# Supplementary material for: Identify potential drugs for cardiovascular diseases caused by stress-induced genes in vascular smooth muscle cells
Source: PeerJ. 2016 Sep 28;4:e2478. doi: 10.7717/peerj.2478 (PMC5045879; doi:10.7717/peerj.2478)
Supplement: Supplemental Information 2 [file peerj-04-2478-s002.cel]

[CEL]
Version=3

[HEADER]
Cols=712
Rows=712
TotalX=712
TotalY=712
OffsetX=0
OffsetY=0
GridCornerUL=230 232
GridCornerUR=4506 248
GridCornerLR=4500 4518
GridCornerLL=224 4503
Axis-invertX=0
AxisInvertY=0
swapXY=0
DatHeader=[1..46078]  C 2:CLS=4733 RWS=4733 XIN=3  YIN=3  VE=17        2.0 11/22/02 13:06:29       HG-U133A.1sq                  6
Algorithm=Percentile
AlgorithmParameters=Percentile:75;CellMargin:2;OutlierHigh:1.500;OutlierLow:1.004

[INTENSITY]
NumberCells=506944
CellHeader=X	Y	MEAN	STDV	NPIXELS
  0	  0	110.0	16.3	 16
  1	  0	9949.8	1116.2	 16
  2	  0	133.3	45.1	 16
  3	  0	10313.8	954.5	 16
  4	  0	73.8	16.3	 16
  5	  0	103.8	15.6	 16
  6	  0	9542.0	937.5	 16
  7	  0	123.0	17.0	 16
  8	  0	9733.5	791.9	 16
  9	  0	118.3	19.5	 16
 10	  0	9640.8	785.9	 16
 11	  0	128.5	21.4	 16
 12	  0	9523.3	822.0	 16
 13	  0	121.0	20.6	 16
 14	  0	9204.0	860.8	 16
 15	  0	112.8	23.8	 16
 16	  0	9489.0	849.5	 16
 17	  0	139.5	21.7	 16
 18	  0	9327.0	874.9	 16
 19	  0	130.8	28.8	 16
 20	  0	9454.0	901.1	 16
 21	  0	114.3	17.5	 16
 22	  0	9574.3	1790.2	 16
 23	  0	117.8	30.0	 16
 24	  0	9417.3	2023.0	 16
 25	  0	181.8	135.1	 16
 26	  0	9773.0	1555.4	 16
 27	  0	124.3	18.4	 16
 28	  0	9415.5	1601.9	 16
 29	  0	134.3	20.6	 16
 30	  0	9609.5	1525.9	 16
 31	  0	124.3	19.2	 16
 32	  0	9475.8	1466.5	 16
 33	  0	120.0	30.2	 16
 34	  0	9431.8	1475.9	 16
 35	  0	127.5	20.7	 16
 36	  0	9842.8	1267.9	 16
 37	  0	117.0	17.5	 16
 38	  0	9714.5	1011.5	 16
 39	  0	120.5	23.6	 16
 40	  0	9817.0	1048.3	 16
 41	  0	124.0	20.9	 16
 42	  0	10015.0	1202.4	 16
 43	  0	113.5	17.2	 16
 44	  0	9568.5	998.6	 16
 45	  0	140.3	25.4	 16
 46	  0	9898.3	1170.0	 16
 47	  0	129.0	27.0	 16
 48	  0	9747.8	787.4	 16
 49	  0	127.5	19.9	 16
 50	  0	9611.8	899.2	 16
 51	  0	128.5	21.4	 16
 52	  0	9357.5	908.0	 16
 53	  0	123.8	17.3	 16
 54	  0	9193.0	847.7	 16
 55	  0	119.5	19.4	 16
 56	  0	9382.0	892.2	 16
 57	  0	118.0	23.1	 16
 58	  0	8966.0	952.6	 16
 59	  0	122.3	14.6	 16
 60	  0	8954.5	934.6	 16
 61	  0	119.5	23.0	 16
 62	  0	8492.5	905.5	 16
 63	  0	135.3	26.8	 16
 64	  0	8825.5	1123.6	 16
 65	  0	115.5	25.8	 16
 66	  0	8451.0	969.8	 16
 67	  0	131.8	29.5	 16
 68	  0	8533.8	1723.1	 16
 69	  0	128.3	30.1	 16
 70	  0	8948.5	1577.0	 16
 71	  0	112.5	18.6	 20
 72	  0	8788.0	2139.7	 16
 73	  0	111.5	23.0	 16
 74	  0	8868.5	1951.9	 16
 75	  0	128.3	19.3	 16
 76	  0	8667.3	1743.7	 16
 77	  0	120.0	14.4	 16
 78	  0	8509.3	1739.2	 16
 79	  0	114.3	17.4	 16
 80	  0	8581.5	1531.5	 16
 81	  0	116.3	19.3	 16
 82	  0	8473.0	1359.9	 16
 83	  0	125.8	20.6	 16
 84	  0	8385.3	1173.6	 16
 85	  0	126.5	17.1	 16
 86	  0	8418.0	1170.7	 16
 87	  0	121.5	26.3	 16
 88	  0	8274.8	1077.2	 16
 89	  0	108.3	19.2	 16
 90	  0	8278.8	937.5	 16
 91	  0	129.0	18.9	 16
 92	  0	8355.8	975.7	 16
 93	  0	119.5	23.1	 16
 94	  0	8612.3	919.3	 16
 95	  0	123.3	15.5	 16
 96	  0	8392.5	849.4	 16
 97	  0	112.3	19.5	 16
 98	  0	8067.5	848.8	 16
 99	  0	108.0	15.3	 16
100	  0	8399.5	982.4	 16
101	  0	111.8	15.1	 16
102	  0	8126.5	953.4	 16
103	  0	121.3	12.8	 16
104	  0	8213.8	1018.9	 16
105	  0	118.8	19.7	 16
106	  0	8065.5	1024.4	 16
107	  0	114.5	20.0	 16
108	  0	7855.8	1025.5	 16
109	  0	99.8	17.3	 16
110	  0	7899.0	1061.0	 16
111	  0	112.8	23.4	 16
112	  0	7715.8	1726.2	 16
113	  0	111.3	19.1	 16
114	  0	7649.3	1459.8	 16
115	  0	108.0	18.9	 16
116	  0	7329.8	1481.4	 16
117	  0	104.3	17.4	 16
118	  0	7021.5	1468.8	 16
119	  0	104.8	12.8	 16
120	  0	7184.8	1313.0	 16
121	  0	106.3	21.2	 16
122	  0	7576.3	1120.4	 16
123	  0	106.5	16.9	 16
124	  0	7417.8	1225.0	 16
125	  0	106.3	20.1	 16
126	  0	7432.3	1242.2	 16
127	  0	99.3	17.2	 16
128	  0	7157.3	1132.3	 16
129	  0	108.3	18.8	 16
130	  0	7265.3	1045.1	 16
131	  0	110.8	17.4	 16
132	  0	7261.8	913.2	 16
133	  0	115.3	16.6	 16
134	  0	7123.8	959.0	 16
135	  0	125.3	19.0	 16
136	  0	7241.0	971.7	 16
137	  0	118.0	68.7	 16
138	  0	7330.8	810.3	 16
139	  0	106.0	18.3	 16
140	  0	7628.3	970.7	 16
141	  0	169.3	86.8	 16
142	  0	7587.3	792.3	 16
143	  0	132.0	15.7	 16
144	  0	7542.3	832.4	 16
145	  0	100.8	17.2	 16
146	  0	7672.5	835.1	 16
147	  0	100.5	20.5	 16
148	  0	7730.0	933.0	 16
149	  0	116.5	22.8	 16
150	  0	7554.8	870.4	 16
151	  0	111.3	21.1	 16
152	  0	7218.0	944.5	 16
153	  0	127.3	18.4	 16
154	  0	6940.5	908.8	 16
155	  0	115.0	18.3	 16
156	  0	6978.0	1534.7	 16
157	  0	114.5	29.2	 16
158	  0	7129.5	1383.0	 16
159	  0	113.3	15.9	 16
160	  0	6866.5	1400.0	 16
161	  0	124.5	22.2	 16
162	  0	6913.3	1335.6	 16
163	  0	130.0	23.9	 16
164	  0	6861.0	1407.6	 16
165	  0	92.0	12.2	 16
166	  0	6881.8	1250.1	 16
167	  0	98.5	17.7	 16
168	  0	6737.8	1252.7	 16
169	  0	124.3	41.7	 16
170	  0	6844.5	1085.1	 16
171	  0	121.3	20.6	 16
172	  0	6936.8	995.8	 16
173	  0	109.3	19.7	 16
174	  0	7093.5	898.0	 16
175	  0	112.5	20.9	 16
176	  0	7135.8	824.8	 16
177	  0	95.8	11.2	 16
178	  0	6890.8	814.8	 16
179	  0	108.5	19.5	 16
180	  0	7165.3	817.1	 16
181	  0	95.8	14.9	 16
182	  0	6952.0	712.7	 16
183	  0	99.5	20.1	 16
184	  0	6513.8	750.8	 16
185	  0	103.5	22.3	 16
186	  0	6673.8	672.7	 16
187	  0	102.8	17.9	 16
188	  0	6663.5	707.2	 16
189	  0	100.5	17.3	 16
190	  0	6568.3	721.5	 16
191	  0	105.3	17.0	 16
192	  0	6614.3	773.1	 16
193	  0	99.0	15.2	 16
194	  0	6590.8	828.5	 16
195	  0	100.3	21.7	 16
196	  0	6235.3	907.1	 16
197	  0	101.3	16.9	 16
198	  0	6197.8	1013.1	 16
199	  0	101.3	14.3	 16
200	  0	6116.0	1421.3	 16
201	  0	101.5	13.6	 16
202	  0	6373.3	1530.1	 16
203	  0	90.3	14.1	 16
204	  0	6239.3	1379.5	 16
205	  0	105.5	17.0	 16
206	  0	6331.5	1227.9	 16
207	  0	96.0	15.8	 16
208	  0	6220.8	1296.3	 16
209	  0	92.8	11.6	 16
210	  0	6198.5	1265.2	 16
211	  0	114.8	23.7	 16
212	  0	6361.5	1300.4	 16
213	  0	98.8	19.1	 16
214	  0	6060.5	1430.1	 20
215	  0	95.0	17.2	 16
216	  0	6006.5	1292.4	 16
217	  0	107.3	17.2	 16
218	  0	5719.3	1275.4	 16
219	  0	122.3	25.4	 16
220	  0	5522.3	1124.8	 16
221	  0	123.0	34.9	 16
222	  0	5575.0	1085.0	 16
223	  0	112.5	16.9	 16
224	  0	5448.3	1059.1	 16
225	  0	99.0	10.0	 16
226	  0	5427.3	1087.5	 16
227	  0	105.3	18.6	 16
228	  0	5707.3	1093.4	 16
229	  0	101.0	13.1	 16
230	  0	6093.0	1229.8	 16
231	  0	87.0	15.2	 16
232	  0	5672.3	1107.5	 16
233	  0	99.3	15.1	 16
234	  0	6112.3	1148.8	 16
235	  0	49.8	11.1	 16
236	  0	3005.8	631.5	 16
237	  0	65.8	21.7	 16
238	  0	95.8	15.2	 16
239	  0	50.0	11.8	 16
240	  0	6335.5	1186.4	 16
241	  0	107.0	17.5	 16
242	  0	5441.3	960.1	 16
243	  0	91.0	14.8	 16
244	  0	5117.3	881.3	 16
245	  0	88.8	15.6	 16
246	  0	5187.5	1230.7	 16
247	  0	98.8	17.9	 16
248	  0	5335.0	1033.4	 16
249	  0	101.0	15.1	 16
250	  0	5264.8	1006.1	 16
251	  0	88.8	12.6	 16
252	  0	5127.3	970.2	 16
253	  0	92.3	16.2	 16
254	  0	5021.5	843.4	 16
255	  0	91.0	11.4	 16
256	  0	4827.8	832.2	 16
257	  0	93.3	12.6	 16
258	  0	4585.3	668.6	 16
259	  0	78.5	13.8	 16
260	  0	4659.5	773.6	 16
261	  0	97.5	95.8	 16
262	  0	5005.5	698.1	 16
263	  0	96.3	17.7	 16
264	  0	5388.3	686.8	 16
265	  0	108.3	16.6	 16
266	  0	5472.5	613.0	 16
267	  0	91.3	12.1	 16
268	  0	5540.8	557.5	 16
269	  0	106.5	21.1	 16
270	  0	5553.8	669.9	 16
271	  0	104.8	21.3	 16
272	  0	5435.5	545.0	 16
273	  0	103.3	16.7	 16
274	  0	5357.0	564.0	 16
275	  0	90.5	13.9	 16
276	  0	5392.3	613.1	 16
277	  0	99.3	17.4	 16
278	  0	5532.8	609.8	 16
279	  0	94.3	12.7	 16
280	  0	5912.8	651.7	 16
281	  0	95.0	17.8	 16
282	  0	5969.8	657.3	 16
283	  0	101.3	30.2	 16
284	  0	6146.5	755.2	 16
285	  0	158.3	89.6	 16
286	  0	6049.5	759.3	 16
287	  0	94.5	40.2	 16
288	  0	5925.3	753.2	 16
289	  0	133.8	39.2	 16
290	  0	6367.3	1252.3	 16
291	  0	92.3	14.2	 16
292	  0	6173.5	1274.0	 16
293	  0	131.5	28.5	 16
294	  0	6475.0	1286.7	 16
295	  0	96.5	14.8	 16
296	  0	6641.8	1265.8	 16
297	  0	97.3	18.2	 16
298	  0	6537.8	1136.7	 16
299	  0	106.3	16.5	 16
300	  0	6488.3	1067.3	 16
301	  0	100.0	15.8	 16
302	  0	6392.0	1111.1	 16
303	  0	108.5	18.9	 16
304	  0	6344.3	1006.1	 16
305	  0	95.0	14.9	 16
306	  0	6524.5	1003.1	 16
307	  0	104.3	14.0	 16
308	  0	6526.0	962.2	 16
309	  0	99.5	13.0	 16
310	  0	6459.8	810.1	 16
311	  0	98.0	13.1	 16
312	  0	6540.5	815.0	 16
313	  0	122.8	26.6	 16
314	  0	6889.5	748.3	 16
315	  0	95.3	16.6	 16
316	  0	7143.5	744.5	 16
317	  0	97.3	17.8	 16
318	  0	7255.5	725.2	 16
319	  0	103.3	20.2	 16
320	  0	7180.8	690.5	 16
321	  0	97.5	9.6	 16
322	  0	7282.8	648.8	 16
323	  0	99.3	14.9	 16
324	  0	7038.3	606.5	 16
325	  0	101.5	14.9	 16
326	  0	7316.5	642.4	 16
327	  0	98.3	15.1	 16
328	  0	7356.3	670.4	 16
329	  0	87.3	12.3	 16
330	  0	6960.3	652.7	 16
331	  0	103.3	13.1	 16
332	  0	7042.0	795.4	 16
333	  0	101.8	16.5	 16
334	  0	6455.5	1294.9	 16
335	  0	93.3	11.0	 16
336	  0	6355.0	1241.1	 16
337	  0	89.5	10.9	 16
338	  0	6194.0	1016.4	 16
339	  0	113.5	18.0	 16
340	  0	6243.8	1003.6	 16
341	  0	108.0	14.8	 16
342	  0	6431.0	1066.7	 16
343	  0	105.0	19.5	 16
344	  0	6839.0	1132.8	 16
345	  0	105.0	16.4	 16
346	  0	6911.3	1133.6	 16
347	  0	90.5	16.0	 16
348	  0	6861.8	1156.1	 16
349	  0	109.5	18.8	 16
350	  0	6879.8	1186.3	 16
351	  0	110.0	34.7	 16
352	  0	6720.3	1110.8	 16
353	  0	111.5	20.9	 16
354	  0	6687.5	1227.1	 16
355	  0	115.5	19.8	 16
356	  0	6860.0	1300.4	 20
357	  0	130.0	82.0	 16
358	  0	7034.3	982.2	 16
359	  0	115.3	16.4	 16
360	  0	6905.8	966.6	 16
361	  0	109.5	16.5	 16
362	  0	6810.0	959.8	 16
363	  0	90.3	13.0	 16
364	  0	6881.5	881.9	 16
365	  0	101.3	13.9	 16
366	  0	7243.0	840.3	 16
367	  0	109.5	15.7	 16
368	  0	7318.0	877.7	 16
369	  0	106.3	16.7	 16
370	  0	6999.3	715.8	 16
371	  0	108.3	16.8	 16
372	  0	7360.3	821.3	 16
373	  0	99.8	15.3	 16
374	  0	7167.8	789.2	 16
375	  0	103.3	11.9	 16
376	  0	7202.5	821.6	 16
377	  0	92.3	14.1	 16
378	  0	7405.5	1686.8	 16
379	  0	99.8	20.4	 16
380	  0	7353.8	1607.7	 16
381	  0	105.5	17.1	 16
382	  0	7254.5	1534.2	 16
383	  0	93.0	9.0	 16
384	  0	7129.5	1355.9	 16
385	  0	99.8	16.2	 16
386	  0	7153.5	1297.9	 16
387	  0	110.0	30.5	 16
388	  0	7338.3	1183.5	 16
389	  0	98.8	19.2	 16
390	  0	7118.3	1105.3	 16
391	  0	104.8	164.0	 16
392	  0	7428.3	1112.9	 16
393	  0	107.5	20.0	 16
394	  0	7556.5	1037.7	 16
395	  0	94.5	11.9	 16
396	  0	7419.3	941.5	 16
397	  0	105.0	12.7	 16
398	  0	7203.3	911.4	 16
399	  0	100.3	15.7	 16
400	  0	6958.3	797.4	 16
401	  0	111.3	15.5	 16
402	  0	6515.5	775.2	 16
403	  0	89.0	15.2	 16
404	  0	6682.3	704.8	 16
405	  0	85.0	14.9	 16
406	  0	6310.3	677.4	 16
407	  0	91.3	18.5	 16
408	  0	6220.5	682.1	 16
409	  0	89.0	14.1	 16
410	  0	6589.5	816.9	 16
411	  0	100.3	12.1	 16
412	  0	6694.5	761.2	 16
413	  0	96.0	14.7	 16
414	  0	6860.5	812.1	 16
415	  0	103.3	20.5	 16
416	  0	7209.8	986.5	 16
417	  0	93.3	15.5	 16
418	  0	7236.8	955.5	 16
419	  0	91.5	16.4	 16
420	  0	7632.0	1041.9	 16
421	  0	96.5	13.3	 16
422	  0	7792.5	1091.1	 16
423	  0	114.3	41.2	 16
424	  0	7714.8	1685.2	 16
425	  0	91.5	11.2	 16
426	  0	7660.5	1792.5	 16
427	  0	89.3	16.9	 16
428	  0	7666.8	1531.9	 16
429	  0	99.8	18.0	 16
430	  0	7785.3	1362.7	 16
431	  0	103.5	10.2	 16
432	  0	7535.5	1287.6	 16
433	  0	102.8	14.1	 16
434	  0	7365.5	1186.3	 16
435	  0	103.0	14.6	 16
436	  0	7361.0	1168.4	 16
437	  0	100.3	17.8	 16
438	  0	7090.3	1032.6	 16
439	  0	101.5	16.2	 16
440	  0	7020.3	876.8	 16
441	  0	115.8	20.2	 16
442	  0	6906.8	986.5	 16
443	  0	100.3	15.9	 16
444	  0	7049.5	811.3	 16
445	  0	102.3	19.4	 16
446	  0	7024.3	944.5	 16
447	  0	108.0	16.6	 16
448	  0	7018.5	991.3	 16
449	  0	102.8	21.4	 16
450	  0	7182.5	1017.3	 16
451	  0	96.8	22.9	 16
452	  0	6951.0	945.9	 16
453	  0	93.8	12.5	 16
454	  0	7083.5	1052.5	 16
455	  0	131.8	54.7	 16
456	  0	7172.5	1102.8	 16
457	  0	110.5	27.2	 16
458	  0	7511.0	1195.7	 16
459	  0	99.0	16.4	 16
460	  0	7253.8	1133.9	 16
461	  0	105.0	11.2	 16
462	  0	7235.3	1154.0	 16
463	  0	98.5	17.9	 16
464	  0	7032.0	1088.9	 16
465	  0	101.8	9.7	 16
466	  0	7315.0	1175.4	 16
467	  0	93.3	18.7	 16
468	  0	7007.5	1795.2	 16
469	  0	103.5	21.5	 16
470	  0	6865.0	1572.1	 16
471	  0	107.3	45.0	 16
472	  0	52.5	9.8	 16
473	  0	4817.8	1250.9	 16
474	  0	53.0	8.9	 16
475	  0	76.3	16.5	 16
476	  0	45.3	7.4	 16
477	  0	92.0	13.8	 16
478	  0	6782.3	1397.2	 16
479	  0	102.5	15.1	 16
480	  0	6869.8	1397.6	 16
481	  0	106.3	20.7	 16
482	  0	6916.8	1291.2	 16
483	  0	92.3	17.0	 16
484	  0	6956.3	1240.5	 16
485	  0	92.8	16.4	 16
486	  0	6894.0	1148.1	 16
487	  0	100.0	16.6	 16
488	  0	7046.8	1114.3	 16
489	  0	167.0	32.9	 16
490	  0	7173.8	1002.3	 16
491	  0	119.8	18.3	 16
492	  0	6901.8	784.4	 16
493	  0	104.8	15.5	 16
494	  0	7222.0	930.1	 16
495	  0	99.0	14.1	 16
496	  0	6819.3	800.5	 16
497	  0	109.8	35.1	 16
498	  0	6747.3	1490.4	 20
499	  0	110.3	22.6	 16
500	  0	6728.8	1622.0	 16
501	  0	104.8	16.8	 16
502	  0	6898.5	1501.1	 16
503	  0	111.8	20.3	 16
504	  0	6869.8	1459.4	 16
505	  0	108.3	15.4	 16
506	  0	7129.8	1435.7	 16
507	  0	103.3	16.8	 16
508	  0	7303.0	1311.9	 16
509	  0	342.3	101.8	 16
510	  0	7575.3	1192.7	 16
511	  0	291.5	52.5	 16
512	  0	7295.8	1731.3	 16
513	  0	100.5	16.4	 16
514	  0	7492.3	1786.7	 16
515	  0	100.8	16.2	 16
516	  0	7463.8	1765.6	 16
517	  0	106.3	14.9	 16
518	  0	8049.3	1618.3	 16
519	  0	95.3	13.9	 16
520	  0	7798.5	1400.9	 16
521	  0	93.3	17.8	 16
522	  0	7594.3	1466.0	 16
523	  0	91.8	14.8	 16
524	  0	7402.8	1427.6	 16
525	  0	109.0	21.7	 16
526	  0	7459.0	1195.2	 16
527	  0	115.3	14.9	 16
528	  0	7612.3	1099.7	 16
529	  0	96.3	17.8	 16
530	  0	7735.8	1015.8	 16
531	  0	88.0	12.0	 16
532	  0	7686.5	1033.9	 16
533	  0	89.5	20.0	 16
534	  0	7590.0	985.2	 16
535	  0	106.8	20.7	 16
536	  0	7588.5	964.4	 16
537	  0	88.5	14.3	 16
538	  0	7624.3	797.5	 16
539	  0	103.3	18.6	 16
540	  0	7946.3	831.3	 16
541	  0	104.5	14.6	 16
542	  0	7966.3	794.5	 16
543	  0	113.5	12.3	 16
544	  0	7859.8	828.1	 16
545	  0	122.8	12.2	 16
546	  0	7848.8	857.4	 16
547	  0	99.0	10.3	 16
548	  0	8016.3	895.1	 16
549	  0	108.5	17.4	 16
550	  0	7865.3	1001.0	 16
551	  0	108.5	21.0	 16
552	  0	7999.0	1061.9	 16
553	  0	116.5	19.8	 16
554	  0	8149.8	1157.5	 16
555	  0	103.3	17.7	 16
556	  0	8292.8	1900.7	 16
557	  0	107.0	22.4	 16
558	  0	8420.0	1953.2	 16
559	  0	114.8	14.8	 16
560	  0	8328.8	1851.5	 16
561	  0	118.3	20.0	 16
562	  0	7963.8	1791.5	 16
563	  0	115.8	16.8	 16
564	  0	7906.5	1799.3	 16
565	  0	104.5	14.5	 16
566	  0	7999.5	1630.7	 16
567	  0	111.0	17.9	 16
568	  0	7852.5	1683.8	 16
569	  0	108.3	23.3	 16
570	  0	8045.5	1586.7	 16
571	  0	113.8	20.8	 16
572	  0	8005.5	1640.4	 16
573	  0	103.8	17.2	 16
574	  0	7866.0	1497.2	 16
575	  0	104.0	16.5	 16
576	  0	7540.0	1461.4	 16
577	  0	93.3	20.0	 16
578	  0	7890.3	1473.2	 16
579	  0	114.5	18.1	 16
580	  0	7968.5	1546.0	 16
581	  0	108.8	26.5	 16
582	  0	7933.8	1542.0	 16
583	  0	106.5	21.4	 16
584	  0	7900.0	1483.7	 16
585	  0	119.8	16.8	 16
586	  0	7742.8	1529.8	 16
587	  0	111.0	26.6	 16
588	  0	7804.5	1601.7	 16
589	  0	114.5	17.6	 16
590	  0	7976.5	1582.2	 16
591	  0	118.3	27.8	 16
592	  0	7964.5	1519.8	 16
593	  0	127.0	22.4	 16
594	  0	8080.5	1569.0	 16
595	  0	120.5	18.2	 16
596	  0	7984.8	1495.7	 16
597	  0	145.8	47.8	 16
598	  0	8065.8	1510.0	 16
599	  0	104.8	22.1	 16
600	  0	8126.0	1390.1	 16
601	  0	102.3	13.6	 16
602	  0	8064.8	1743.8	 16
603	  0	97.3	17.2	 16
604	  0	8267.0	1611.0	 16
605	  0	107.3	19.2	 16
606	  0	7996.5	1702.1	 16
607	  0	178.0	34.2	 16
608	  0	8260.5	1633.6	 16
609	  0	137.3	23.7	 16
610	  0	8262.8	1681.5	 16
611	  0	119.3	25.8	 16
612	  0	8371.0	1554.5	 16
613	  0	108.5	15.8	 16
614	  0	8476.0	1585.5	 16
615	  0	114.5	21.2	 16
616	  0	8643.8	1581.4	 16
617	  0	117.5	15.4	 16
618	  0	8796.8	1694.6	 16
619	  0	129.3	22.3	 16
620	  0	9518.0	1920.9	 16
621	  0	110.3	16.7	 16
622	  0	9340.8	1795.3	 16
623	  0	111.3	17.5	 16
624	  0	9312.8	1710.9	 16
625	  0	102.3	23.3	 16
626	  0	9070.3	1640.6	 16
627	  0	118.8	22.4	 16
628	  0	8861.3	1716.2	 16
629	  0	107.3	20.7	 16
630	  0	8427.3	1598.3	 16
631	  0	128.3	30.4	 16
632	  0	8246.3	1532.6	 16
633	  0	111.5	19.4	 16
634	  0	7916.3	1541.6	 16
635	  0	122.3	56.7	 16
636	  0	8387.5	1705.8	 16
637	  0	115.3	22.6	 16
638	  0	8380.0	1678.2	 16
639	  0	127.0	20.1	 16
640	  0	8433.5	1801.6	 16
641	  0	131.3	27.5	 20
642	  0	8719.3	792.3	 16
643	  0	110.0	15.6	 16
644	  0	8894.3	892.5	 16
645	  0	100.3	15.7	 16
646	  0	9377.3	1624.0	 16
647	  0	110.3	13.0	 16
648	  0	9274.5	1597.8	 16
649	  0	124.0	19.3	 16
650	  0	9106.3	1650.5	 16
651	  0	102.3	18.8	 16
652	  0	9059.5	1560.3	 16
653	  0	121.0	20.8	 16
654	  0	8953.8	1512.7	 16
655	  0	109.5	19.8	 16
656	  0	9355.0	1378.2	 16
657	  0	103.0	16.7	 16
658	  0	9345.5	1184.9	 16
659	  0	104.5	22.8	 16
660	  0	9310.0	1322.3	 16
661	  0	119.5	22.1	 16
662	  0	9184.0	1108.5	 16
663	  0	114.0	45.3	 16
664	  0	9576.5	1043.1	 16
665	  0	112.3	12.8	 16
666	  0	9516.8	962.2	 16
667	  0	108.0	20.0	 16
668	  0	9427.8	854.8	 16
669	  0	127.0	21.4	 16
670	  0	9649.8	943.4	 16
671	  0	111.3	14.8	 16
672	  0	9509.5	857.7	 16
673	  0	114.8	105.3	 16
674	  0	9669.5	760.7	 16
675	  0	121.3	19.3	 16
676	  0	9700.8	740.1	 16
677	  0	107.0	15.2	 16
678	  0	9629.5	740.8	 16
679	  0	118.0	28.8	 16
680	  0	9739.8	735.6	 16
681	  0	107.3	18.0	 16
682	  0	9544.3	803.5	 16
683	  0	112.5	15.7	 16
684	  0	9539.0	718.2	 16
685	  0	131.3	24.3	 16
686	  0	9455.5	906.3	 16
687	  0	102.3	18.7	 16
688	  0	10034.0	1033.0	 16
689	  0	110.3	19.6	 16
690	  0	9848.3	2196.0	 16
691	  0	103.0	14.5	 16
692	  0	9959.5	1998.2	 16
693	  0	119.8	16.7	 16
694	  0	10289.8	1936.1	 16
695	  0	125.3	18.2	 16
696	  0	10196.8	1826.2	 16
697	  0	118.3	12.8	 16
698	  0	10000.8	2039.9	 16
699	  0	111.0	17.4	 16
700	  0	9876.8	1764.9	 16
701	  0	125.8	16.3	 16
702	  0	10212.8	1667.0	 16
703	  0	126.8	19.0	 16
704	  0	10334.5	1309.3	 16
705	  0	116.0	16.0	 16
706	  0	10738.8	1382.7	 16
707	  0	77.5	14.2	 16
708	  0	134.0	16.7	 16
709	  0	10326.0	1331.6	 16
710	  0	138.0	13.9	 16
711	  0	10657.3	1240.4	 16
  0	  1	9214.3	1016.7	 16
  1	  1	135.5	21.9	 16
  2	  1	9041.0	947.5	 16
  3	  1	124.8	21.3	 16
  4	  1	63.3	10.6	 16
  5	  1	222.3	22.7	 16
  6	  1	118.8	23.6	 16
  7	  1	70.8	9.0	 16
  8	  1	203.3	22.6	 16
  9	  1	86.3	10.2	 16
 10	  1	123.5	21.6	 16
 11	  1	118.0	15.2	 16
 12	  1	100.0	19.6	 16
 13	  1	122.0	30.0	 16
 14	  1	175.8	20.6	 16
 15	  1	152.0	22.9	 16
 16	  1	156.5	22.2	 16
 17	  1	116.5	21.0	 16
 18	  1	83.3	17.1	 16
 19	  1	278.3	38.9	 16
 20	  1	153.0	25.5	 16
 21	  1	78.3	14.0	 16
 22	  1	269.8	41.1	 16
 23	  1	103.8	26.8	 16
 24	  1	266.3	35.9	 16
 25	  1	907.5	75.2	 16
 26	  1	175.5	28.2	 16
 27	  1	264.3	60.5	 16
 28	  1	168.5	21.4	 16
 29	  1	306.5	48.4	 16
 30	  1	106.5	38.0	 16
 31	  1	78.3	14.2	 16
 32	  1	132.5	29.0	 16
 33	  1	84.5	16.1	 16
 34	  1	282.5	29.6	 16
 35	  1	116.5	22.7	 16
 36	  1	137.3	19.7	 16
 37	  1	111.3	14.8	 16
 38	  1	213.8	25.6	 16
 39	  1	164.0	26.9	 16
 40	  1	239.3	29.8	 16
 41	  1	121.0	19.3	 16
 42	  1	698.8	37.7	 16
 43	  1	221.3	30.0	 16
 44	  1	130.0	19.7	 16
 45	  1	518.8	51.3	 16
 46	  1	144.3	22.3	 16
 47	  1	329.3	39.6	 16
 48	  1	132.5	22.7	 16
 49	  1	235.3	46.5	 16
 50	  1	164.8	27.6	 16
 51	  1	240.8	56.1	 16
 52	  1	245.5	33.7	 16
 53	  1	83.8	11.8	 16
 54	  1	83.8	18.3	 16
 55	  1	119.5	13.1	 16
 56	  1	155.8	22.8	 16
 57	  1	181.5	23.7	 16
 58	  1	878.8	118.5	 16
 59	  1	89.8	18.0	 16
 60	  1	104.3	25.3	 16
 61	  1	78.5	12.2	 16
 62	  1	138.0	23.9	 16
 63	  1	116.8	39.3	 16
 64	  1	151.3	25.6	 16
 65	  1	110.5	14.7	 16
 66	  1	231.5	21.5	 16
 67	  1	149.8	21.4	 16
 68	  1	287.0	30.7	 16
 69	  1	65.0	18.6	 16
 70	  1	118.3	20.0	 16
 71	  1	305.3	29.7	 16
 72	  1	128.3	21.7	 20
 73	  1	340.0	37.9	 16
 74	  1	314.0	58.4	 16
 75	  1	73.0	12.6	 16
 76	  1	126.0	18.7	 16
 77	  1	82.0	13.7	 16
 78	  1	127.3	21.8	 16
 79	  1	78.3	13.3	 16
 80	  1	111.3	24.3	 16
 81	  1	87.0	14.6	 16
 82	  1	297.5	44.9	 16
 83	  1	192.0	37.2	 16
 84	  1	123.0	21.0	 16
 85	  1	83.3	15.3	 16
 86	  1	74.3	9.3	 16
 87	  1	482.0	54.9	 16
 88	  1	129.0	45.5	 16
 89	  1	284.3	35.3	 16
 90	  1	122.0	20.6	 16
 91	  1	98.5	14.7	 16
 92	  1	86.5	21.2	 16
 93	  1	154.0	19.2	 16
 94	  1	166.8	19.6	 16
 95	  1	252.5	36.3	 16
 96	  1	84.8	16.0	 16
 97	  1	212.8	42.3	 16
 98	  1	125.0	39.4	 16
 99	  1	157.3	18.2	 16
100	  1	317.8	49.6	 16
101	  1	99.0	21.7	 16
102	  1	75.3	11.4	 16
103	  1	140.3	22.4	 16
104	  1	107.8	19.5	 16
105	  1	148.0	24.4	 16
106	  1	133.8	16.0	 16
107	  1	118.5	14.7	 16
108	  1	130.8	46.8	 16
109	  1	63.8	11.6	 16
110	  1	111.0	16.3	 16
111	  1	235.5	33.9	 16
112	  1	160.8	29.0	 16
113	  1	141.3	20.2	 16
114	  1	208.5	26.6	 16
115	  1	98.8	22.2	 16
116	  1	151.0	23.0	 16
117	  1	115.0	14.9	 16
118	  1	86.5	9.4	 16
119	  1	181.8	24.7	 16
120	  1	256.0	42.3	 16
121	  1	133.5	19.2	 16
122	  1	128.5	23.5	 16
123	  1	133.3	23.1	 16
124	  1	97.5	13.7	 16
125	  1	148.5	19.9	 16
126	  1	143.3	19.4	 16
127	  1	143.8	29.5	 16
128	  1	158.3	25.6	 16
129	  1	67.3	9.9	 16
130	  1	132.3	24.6	 16
131	  1	120.3	10.3	 16
132	  1	143.0	18.3	 16
133	  1	158.3	35.1	 16
134	  1	191.0	24.1	 16
135	  1	141.0	20.6	 16
136	  1	94.0	17.8	 16
137	  1	79.3	13.0	 16
138	  1	84.0	17.5	 16
139	  1	100.8	36.3	 16
140	  1	71.5	10.9	 16
141	  1	74.3	13.2	 16
142	  1	252.8	32.0	 16
143	  1	149.5	25.0	 16
144	  1	313.8	36.0	 16
145	  1	448.3	99.9	 16
146	  1	273.8	34.3	 16
147	  1	81.3	35.4	 16
148	  1	652.3	119.6	 16
149	  1	112.0	19.2	 16
150	  1	100.3	22.7	 16
151	  1	101.3	15.3	 16
152	  1	158.5	18.4	 16
153	  1	158.5	20.2	 16
154	  1	83.8	16.2	 16
155	  1	72.0	11.0	 16
156	  1	400.8	53.1	 16
157	  1	314.0	32.6	 16
158	  1	94.5	16.8	 16
159	  1	117.3	20.6	 16
160	  1	140.0	24.8	 16
161	  1	266.5	50.2	 16
162	  1	125.8	20.3	 16
163	  1	191.3	31.7	 16
164	  1	356.3	55.0	 16
165	  1	113.8	23.1	 16
166	  1	178.8	45.6	 16
167	  1	334.5	38.9	 16
168	  1	116.5	18.7	 16
169	  1	81.8	23.4	 16
170	  1	140.8	20.2	 16
171	  1	86.0	14.5	 16
172	  1	232.0	33.4	 16
173	  1	99.0	23.3	 16
174	  1	109.0	20.4	 16
175	  1	1140.0	153.3	 16
176	  1	174.3	16.5	 16
177	  1	119.8	20.1	 16
178	  1	133.3	20.1	 16
179	  1	129.0	19.1	 16
180	  1	175.8	31.6	 16
181	  1	230.5	84.1	 16
182	  1	91.5	17.1	 16
183	  1	143.8	32.6	 16
184	  1	101.3	31.8	 16
185	  1	87.0	20.1	 16
186	  1	146.3	101.5	 16
187	  1	179.8	16.7	 16
188	  1	111.3	21.4	 16
189	  1	610.0	92.0	 16
190	  1	84.5	15.0	 16
191	  1	111.5	17.5	 16
192	  1	229.0	40.5	 16
193	  1	172.3	23.1	 16
194	  1	130.3	18.9	 16
195	  1	172.3	25.1	 16
196	  1	144.0	20.4	 16
197	  1	93.5	15.8	 16
198	  1	129.0	21.0	 16
199	  1	188.0	22.0	 16
200	  1	107.8	14.2	 16
201	  1	100.8	25.2	 16
202	  1	287.3	37.9	 16
203	  1	187.0	30.7	 16
204	  1	76.8	14.1	 16
205	  1	101.0	11.0	 16
206	  1	247.8	27.2	 16
207	  1	144.5	19.3	 16
208	  1	76.0	17.3	 16
209	  1	84.5	15.0	 16
210	  1	83.0	18.8	 16
211	  1	292.3	41.9	 16
212	  1	72.3	15.3	 16
213	  1	79.3	15.7	 16
214	  1	85.5	19.5	 16
215	  1	137.5	18.3	 20
216	  1	90.5	16.1	 16
217	  1	513.0	99.7	 16
218	  1	211.3	35.6	 16
219	  1	104.5	18.7	 16
220	  1	76.5	12.4	 16
221	  1	181.8	24.5	 16
222	  1	83.3	22.9	 16
223	  1	337.8	67.1	 16
224	  1	76.0	16.7	 16
225	  1	70.3	13.6	 16
226	  1	189.8	29.1	 16
227	  1	150.3	28.8	 16
228	  1	185.8	32.2	 16
229	  1	212.3	49.8	 16
230	  1	273.3	30.1	 16
231	  1	99.3	15.7	 16
232	  1	70.3	15.5	 16
233	  1	92.0	16.4	 16
234	  1	93.5	15.8	 16
235	  1	50.0	11.2	 16
236	  1	844.3	187.5	 16
237	  1	53.0	11.6	 16
238	  1	66.5	17.2	 16
239	  1	49.0	12.6	 16
240	  1	135.8	17.8	 16
241	  1	126.8	21.2	 16
242	  1	94.5	16.3	 16
243	  1	150.3	45.1	 16
244	  1	186.8	33.0	 16
245	  1	189.8	19.6	 16
246	  1	129.3	15.2	 16
247	  1	152.8	32.4	 16
248	  1	68.5	17.7	 16
249	  1	108.8	17.3	 16
250	  1	108.5	20.6	 16
251	  1	96.0	19.9	 16
252	  1	67.0	10.4	 16
253	  1	105.8	18.1	 16
254	  1	66.0	14.1	 16
255	  1	66.8	11.4	 16
256	  1	155.0	25.1	 16
257	  1	73.8	13.4	 16
258	  1	97.8	16.8	 16
259	  1	155.0	30.5	 16
260	  1	84.0	13.5	 16
261	  1	184.8	55.0	 16
262	  1	87.8	16.2	 16
263	  1	115.8	30.4	 16
264	  1	163.5	24.9	 16
265	  1	184.3	30.1	 16
266	  1	102.0	22.3	 16
267	  1	118.5	11.5	 16
268	  1	127.3	13.4	 16
269	  1	62.0	12.3	 16
270	  1	72.0	16.3	 16
271	  1	71.3	9.6	 16
272	  1	84.5	17.6	 16
273	  1	467.3	78.8	 16
274	  1	83.0	12.8	 16
275	  1	91.8	12.4	 16
276	  1	809.3	106.7	 16
277	  1	96.8	15.9	 16
278	  1	130.3	100.5	 16
279	  1	183.3	16.6	 16
280	  1	78.5	18.2	 16
281	  1	134.0	83.1	 16
282	  1	103.8	14.4	 16
283	  1	211.3	28.6	 16
284	  1	98.8	18.0	 16
285	  1	174.3	21.7	 16
286	  1	185.5	28.6	 16
287	  1	113.8	19.0	 16
288	  1	114.5	18.1	 16
289	  1	200.0	23.8	 16
290	  1	187.8	24.4	 16
291	  1	69.0	10.1	 16
292	  1	272.0	33.2	 16
293	  1	178.5	32.2	 16
294	  1	136.8	25.0	 16
295	  1	90.3	14.3	 16
296	  1	76.3	15.3	 16
297	  1	76.8	14.8	 16
298	  1	196.8	79.1	 16
299	  1	67.0	11.9	 16
300	  1	67.5	11.2	 16
301	  1	92.3	92.6	 16
302	  1	88.0	11.6	 16
303	  1	196.5	68.2	 16
304	  1	66.8	11.3	 16
305	  1	132.8	18.7	 16
306	  1	193.3	36.2	 16
307	  1	88.3	13.9	 16
308	  1	118.0	22.5	 16
309	  1	161.5	18.5	 16
310	  1	95.0	17.2	 16
311	  1	218.5	29.3	 16
312	  1	104.3	17.5	 16
313	  1	125.0	18.3	 16
314	  1	288.3	54.4	 16
315	  1	155.3	34.0	 16
316	  1	74.5	14.9	 16
317	  1	141.0	27.7	 16
318	  1	93.3	9.7	 16
319	  1	162.5	30.2	 16
320	  1	152.5	28.6	 16
321	  1	156.0	17.8	 16
322	  1	80.5	10.9	 16
323	  1	129.0	24.6	 16
324	  1	121.0	15.7	 16
325	  1	79.8	14.6	 16
326	  1	109.3	17.3	 16
327	  1	75.3	12.5	 16
328	  1	150.3	27.0	 16
329	  1	327.5	43.7	 16
330	  1	117.8	21.6	 16
331	  1	127.0	26.6	 16
332	  1	182.0	33.6	 16
333	  1	258.8	31.2	 16
334	  1	113.0	18.9	 16
335	  1	670.5	105.6	 16
336	  1	124.3	14.5	 16
337	  1	269.5	59.0	 16
338	  1	84.3	46.7	 16
339	  1	69.3	10.5	 16
340	  1	172.0	33.1	 16
341	  1	100.0	17.8	 16
342	  1	196.3	58.2	 16
343	  1	146.8	17.6	 16
344	  1	133.3	17.1	 16
345	  1	368.3	40.3	 16
346	  1	141.0	18.8	 16
347	  1	240.0	37.2	 16
348	  1	359.0	88.7	 16
349	  1	185.3	21.7	 16
350	  1	79.3	12.3	 16
351	  1	124.0	66.8	 16
352	  1	202.8	35.5	 16
353	  1	102.0	15.1	 16
354	  1	7242.8	1284.2	 16
355	  1	512.5	80.7	 16
356	  1	336.5	35.8	 16
357	  1	94.8	19.3	 20
358	  1	88.0	15.9	 16
359	  1	106.5	19.4	 16
360	  1	63.8	12.3	 16
361	  1	54.8	9.9	 16
362	  1	61.3	11.1	 16
363	  1	81.3	15.0	 16
364	  1	70.3	38.2	 16
365	  1	68.5	14.0	 16
366	  1	95.8	15.0	 16
367	  1	112.0	22.2	 16
368	  1	246.0	50.4	 16
369	  1	90.0	13.6	 16
370	  1	110.8	95.8	 16
371	  1	6381.5	998.5	 16
372	  1	130.0	23.2	 16
373	  1	727.8	120.3	 16
374	  1	119.8	17.9	 16
375	  1	124.0	25.8	 16
376	  1	159.8	20.8	 16
377	  1	177.0	27.4	 16
378	  1	203.3	46.2	 16
379	  1	173.0	28.4	 16
380	  1	88.3	8.1	 16
381	  1	168.3	20.4	 16
382	  1	306.3	45.0	 16
383	  1	254.0	23.4	 16
384	  1	256.3	29.1	 16
385	  1	76.8	21.2	 16
386	  1	89.5	15.9	 16
387	  1	76.3	11.9	 16
388	  1	55.3	10.6	 16
389	  1	59.3	9.6	 16
390	  1	83.5	11.8	 16
391	  1	101.5	16.4	 16
392	  1	104.8	126.3	 16
393	  1	78.3	17.1	 16
394	  1	84.0	16.8	 16
395	  1	242.3	40.5	 16
396	  1	326.0	44.6	 16
397	  1	137.0	13.6	 16
398	  1	153.8	19.6	 16
399	  1	152.3	24.9	 16
400	  1	122.8	25.6	 16
401	  1	85.0	16.0	 16
402	  1	145.3	21.3	 16
403	  1	127.8	14.6	 16
404	  1	466.3	59.9	 16
405	  1	552.3	63.5	 16
406	  1	198.8	28.2	 16
407	  1	142.3	23.9	 16
408	  1	178.0	21.2	 16
409	  1	167.5	96.7	 16
410	  1	136.5	19.4	 16
411	  1	180.0	22.7	 16
412	  1	304.8	27.6	 16
413	  1	182.3	24.6	 16
414	  1	141.3	16.6	 16
415	  1	91.8	15.2	 16
416	  1	88.3	17.3	 16
417	  1	174.5	27.3	 16
418	  1	130.5	21.2	 16
419	  1	113.0	17.1	 16
420	  1	278.5	24.3	 16
421	  1	157.3	18.9	 16
422	  1	237.5	29.7	 16
423	  1	304.8	29.5	 16
424	  1	108.8	18.5	 16
425	  1	118.0	16.8	 16
426	  1	131.5	19.4	 16
427	  1	87.0	16.5	 16
428	  1	79.3	10.7	 16
429	  1	191.3	29.4	 16
430	  1	68.0	16.7	 16
431	  1	165.0	27.8	 16
432	  1	150.8	40.0	 16
433	  1	160.0	30.6	 16
434	  1	205.8	36.4	 16
435	  1	89.3	11.9	 16
436	  1	78.8	17.0	 16
437	  1	67.5	11.3	 16
438	  1	67.5	14.0	 16
439	  1	164.5	19.9	 16
440	  1	79.3	10.4	 16
441	  1	99.5	13.9	 16
442	  1	108.5	15.3	 16
443	  1	73.0	13.7	 16
444	  1	114.3	19.4	 16
445	  1	93.5	14.3	 16
446	  1	75.3	14.6	 16
447	  1	63.8	7.8	 16
448	  1	76.0	13.6	 16
449	  1	87.3	18.3	 16
450	  1	97.3	12.7	 16
451	  1	128.8	31.7	 16
452	  1	319.3	19.9	 16
453	  1	309.8	28.8	 16
454	  1	142.3	25.6	 16
455	  1	88.8	13.7	 16
456	  1	496.3	61.5	 16
457	  1	593.3	54.2	 16
458	  1	123.5	20.9	 16
459	  1	91.8	16.2	 16
460	  1	275.3	43.4	 16
461	  1	157.0	22.0	 16
462	  1	69.5	11.2	 16
463	  1	70.0	9.5	 16
464	  1	110.5	14.8	 16
465	  1	405.3	57.0	 16
466	  1	179.3	61.8	 16
467	  1	183.5	32.6	 16
468	  1	180.3	21.2	 16
469	  1	117.0	79.0	 16
470	  1	244.3	17.8	 16
471	  1	58.5	6.8	 16
472	  1	47.5	9.8	 16
473	  1	2013.5	296.7	 16
474	  1	41.5	8.6	 16
475	  1	73.0	8.5	 16
476	  1	45.3	8.7	 16
477	  1	211.0	28.0	 16
478	  1	77.0	19.4	 16
479	  1	80.3	15.5	 16
480	  1	64.0	13.7	 16
481	  1	60.8	10.0	 16
482	  1	340.5	44.7	 16
483	  1	97.0	16.1	 16
484	  1	107.8	19.1	 16
485	  1	253.5	34.9	 16
486	  1	85.0	16.5	 16
487	  1	85.3	13.8	 16
488	  1	76.3	11.4	 16
489	  1	78.0	11.7	 16
490	  1	200.3	30.8	 16
491	  1	122.5	34.1	 16
492	  1	76.0	13.0	 16
493	  1	147.8	26.6	 16
494	  1	137.8	23.4	 16
495	  1	101.5	18.0	 16
496	  1	201.5	49.5	 16
497	  1	190.3	34.5	 16
498	  1	63.3	11.1	 16
499	  1	94.0	24.2	 16
500	  1	88.0	19.2	 20
501	  1	103.0	19.2	 16
502	  1	205.0	49.2	 16
503	  1	95.0	15.2	 16
504	  1	71.5	9.7	 16
505	  1	69.0	12.2	 16
506	  1	300.5	36.1	 16
507	  1	173.0	27.8	 16
508	  1	135.3	23.2	 16
509	  1	162.3	24.4	 16
510	  1	328.0	44.5	 16
511	  1	241.5	26.1	 16
512	  1	83.3	9.0	 16
513	  1	675.5	92.3	 16
514	  1	91.0	13.6	 16
515	  1	126.5	22.9	 16
516	  1	106.5	84.8	 16
517	  1	122.8	21.2	 16
518	  1	505.5	61.0	 16
519	  1	328.0	37.9	 16
520	  1	88.3	11.8	 16
521	  1	65.5	14.0	 16
522	  1	316.8	38.8	 16
523	  1	93.3	9.2	 16
524	  1	292.8	31.3	 16
525	  1	400.0	43.8	 16
526	  1	274.5	40.8	 16
527	  1	139.0	25.9	 16
528	  1	95.3	15.1	 16
529	  1	166.3	27.7	 16
530	  1	466.8	59.4	 16
531	  1	75.3	13.0	 16
532	  1	60.3	12.3	 16
533	  1	146.8	218.2	 16
534	  1	177.8	22.0	 16
535	  1	172.3	37.6	 16
536	  1	101.3	36.4	 16
537	  1	90.3	18.4	 16
538	  1	102.5	17.3	 16
539	  1	113.3	81.1	 16
540	  1	175.3	16.9	 16
541	  1	131.8	56.7	 16
542	  1	664.0	73.6	 16
543	  1	153.8	21.6	 16
544	  1	154.0	23.7	 16
545	  1	88.5	10.5	 16
546	  1	185.8	34.8	 16
547	  1	250.8	37.0	 16
548	  1	86.5	25.1	 16
549	  1	87.0	13.4	 16
550	  1	284.5	61.6	 16
551	  1	118.8	17.3	 16
552	  1	111.0	24.4	 16
553	  1	162.8	33.3	 16
554	  1	83.5	46.5	 16
555	  1	94.5	17.1	 16
556	  1	100.8	17.0	 16
557	  1	186.3	24.8	 16
558	  1	156.0	24.0	 16
559	  1	858.3	129.8	 16
560	  1	3359.5	194.6	 16
561	  1	156.5	37.4	 16
562	  1	327.8	39.0	 16
563	  1	113.5	20.1	 16
564	  1	154.5	26.5	 16
565	  1	130.0	14.8	 16
566	  1	143.3	20.5	 16
567	  1	74.3	14.1	 16
568	  1	572.0	90.1	 16
569	  1	139.3	13.9	 16
570	  1	66.3	8.8	 16
571	  1	67.3	10.3	 16
572	  1	60.3	11.4	 16
573	  1	152.8	24.9	 16
574	  1	85.5	18.5	 16
575	  1	66.3	7.0	 16
576	  1	104.3	14.7	 16
577	  1	102.5	21.6	 16
578	  1	114.5	19.4	 16
579	  1	180.3	21.9	 16
580	  1	192.8	31.2	 16
581	  1	77.5	14.1	 16
582	  1	184.8	25.0	 16
583	  1	288.0	45.9	 16
584	  1	173.5	22.0	 16
585	  1	161.5	70.0	 16
586	  1	143.3	22.8	 16
587	  1	82.3	13.7	 16
588	  1	93.0	14.9	 16
589	  1	160.0	18.8	 16
590	  1	152.3	21.5	 16
591	  1	77.3	11.0	 16
592	  1	237.5	48.2	 16
593	  1	90.3	20.7	 16
594	  1	102.3	14.9	 16
595	  1	72.5	14.0	 16
596	  1	242.0	29.9	 16
597	  1	222.3	42.4	 16
598	  1	240.0	17.6	 16
599	  1	245.8	27.6	 16
600	  1	250.3	25.0	 16
601	  1	222.8	28.1	 16
602	  1	208.0	25.9	 16
603	  1	149.0	22.3	 16
604	  1	489.5	90.3	 16
605	  1	71.5	11.9	 16
606	  1	89.5	18.4	 16
607	  1	125.5	27.6	 16
608	  1	221.3	36.1	 16
609	  1	3413.0	679.1	 16
610	  1	189.0	32.1	 16
611	  1	253.8	31.6	 16
612	  1	91.3	18.5	 16
613	  1	96.5	16.4	 16
614	  1	96.8	16.9	 16
615	  1	98.0	18.8	 16
616	  1	149.3	19.4	 16
617	  1	274.5	36.6	 16
618	  1	143.5	31.1	 16
619	  1	85.5	19.1	 16
620	  1	147.5	19.6	 16
621	  1	110.3	17.1	 16
622	  1	146.3	17.1	 16
623	  1	143.0	26.3	 16
624	  1	130.5	21.3	 16
625	  1	125.8	11.8	 16
626	  1	504.8	91.5	 16
627	  1	158.5	26.5	 16
628	  1	352.8	33.5	 16
629	  1	133.8	25.2	 16
630	  1	148.8	17.9	 16
631	  1	602.8	121.7	 16
632	  1	668.8	144.5	 16
633	  1	795.3	103.0	 16
634	  1	70.5	15.0	 16
635	  1	77.3	12.7	 16
636	  1	97.0	13.0	 16
637	  1	170.8	28.8	 16
638	  1	119.5	17.3	 16
639	  1	135.3	34.9	 16
640	  1	121.5	24.3	 16
641	  1	176.3	28.9	 16
642	  1	101.5	20.4	 20
643	  1	494.5	95.8	 16
644	  1	981.3	140.1	 16
645	  1	76.0	9.4	 16
646	  1	79.0	14.2	 16
647	  1	114.5	19.9	 16
648	  1	85.5	13.4	 16
649	  1	100.5	18.6	 16
650	  1	121.0	13.8	 16
651	  1	74.5	13.4	 16
652	  1	167.0	22.9	 16
653	  1	110.3	16.0	 16
654	  1	103.0	24.0	 16
655	  1	417.8	54.7	 16
656	  1	63.8	9.8	 16
657	  1	273.0	26.7	 16
658	  1	75.8	12.2	 16
659	  1	359.3	34.3	 16
660	  1	96.3	18.4	 16
661	  1	91.0	14.8	 16
662	  1	79.5	15.8	 16
663	  1	216.3	32.2	 16
664	  1	134.8	28.4	 16
665	  1	70.8	12.0	 16
666	  1	77.3	12.8	 16
667	  1	1292.8	89.9	 16
668	  1	256.0	33.0	 16
669	  1	251.3	22.0	 16
670	  1	126.3	21.6	 16
671	  1	125.0	25.0	 16
672	  1	226.8	30.2	 16
673	  1	129.3	16.8	 16
674	  1	163.3	25.3	 16
675	  1	343.8	43.2	 16
676	  1	207.5	32.4	 16
677	  1	114.3	14.3	 16
678	  1	128.3	27.3	 16
679	  1	122.3	18.2	 16
680	  1	2666.3	385.0	 16
681	  1	78.0	13.5	 16
682	  1	188.8	27.2	 16
683	  1	147.8	19.7	 16
684	  1	421.0	64.6	 16
685	  1	138.0	18.8	 16
686	  1	214.0	23.6	 16
687	  1	426.5	34.5	 16
688	  1	121.8	27.1	 16
689	  1	234.8	56.2	 16
690	  1	100.8	18.0	 16
691	  1	1479.5	195.2	 16
692	  1	1177.5	102.4	 16
693	  1	89.3	13.6	 16
694	  1	88.0	14.4	 16
695	  1	82.3	13.8	 16
696	  1	78.5	59.0	 16
697	  1	86.5	14.0	 16
698	  1	87.0	17.9	 16
699	  1	96.8	11.8	 16
700	  1	94.3	27.8	 16
701	  1	71.5	13.0	 16
702	  1	198.8	37.2	 16
703	  1	229.0	23.3	 16
704	  1	250.3	35.3	 16
705	  1	171.5	19.4	 16
706	  1	86.3	12.1	 16
707	  1	53.0	13.8	 16
708	  1	9654.3	885.1	 16
709	  1	136.3	21.7	 16
710	  1	9173.8	805.8	 16
711	  1	135.3	19.0	 16
  0	  2	114.0	22.3	 16
  1	  2	8756.5	1125.4	 16
  2	  2	127.5	32.2	 16
  3	  2	9258.8	1195.7	 16
  4	  2	64.8	19.0	 16
  5	  2	241.5	33.2	 16
  6	  2	114.5	18.2	 16
  7	  2	76.0	11.9	 16
  8	  2	170.8	38.9	 16
  9	  2	71.3	8.4	 16
 10	  2	86.5	13.3	 16
 11	  2	145.0	31.4	 16
 12	  2	82.3	14.4	 16
 13	  2	105.3	16.8	 16
 14	  2	223.5	23.2	 16
 15	  2	265.3	34.1	 16
 16	  2	233.8	36.8	 16
 17	  2	106.8	15.3	 16
 18	  2	86.3	22.8	 16
 19	  2	290.8	34.1	 16
 20	  2	80.3	19.5	 16
 21	  2	65.3	12.5	 16
 22	  2	100.3	19.1	 16
 23	  2	89.3	27.8	 16
 24	  2	329.0	42.2	 16
 25	  2	863.8	140.7	 16
 26	  2	89.5	28.5	 16
 27	  2	201.5	22.1	 16
 28	  2	256.8	33.0	 16
 29	  2	193.0	34.5	 16
 30	  2	149.3	22.8	 16
 31	  2	81.3	9.6	 16
 32	  2	168.0	28.8	 16
 33	  2	97.5	17.7	 16
 34	  2	398.5	46.7	 16
 35	  2	113.3	21.2	 16
 36	  2	278.3	25.4	 16
 37	  2	90.8	14.5	 16
 38	  2	140.8	33.7	 16
 39	  2	162.5	25.6	 16
 40	  2	213.5	28.7	 16
 41	  2	142.3	26.6	 16
 42	  2	284.5	28.7	 16
 43	  2	137.0	17.1	 16
 44	  2	95.5	19.6	 16
 45	  2	371.3	55.6	 16
 46	  2	113.0	15.4	 16
 47	  2	228.5	28.2	 16
 48	  2	95.5	13.9	 16
 49	  2	209.0	34.0	 16
 50	  2	157.8	40.2	 16
 51	  2	199.0	24.0	 16
 52	  2	169.5	81.3	 16
 53	  2	73.3	20.9	 16
 54	  2	74.5	11.3	 16
 55	  2	105.3	11.1	 16
 56	  2	206.8	27.1	 16
 57	  2	259.8	37.4	 16
 58	  2	248.5	34.2	 16
 59	  2	70.0	9.7	 16
 60	  2	100.8	19.4	 16
 61	  2	88.8	12.2	 16
 62	  2	99.8	18.1	 16
 63	  2	93.0	19.4	 16
 64	  2	131.3	22.3	 16
 65	  2	147.5	24.5	 16
 66	  2	153.8	26.4	 16
 67	  2	133.0	25.0	 16
 68	  2	194.0	28.9	 16
 69	  2	71.3	13.7	 16
 70	  2	92.0	13.8	 16
 71	  2	125.5	20.9	 16
 72	  2	82.0	13.5	 16
 73	  2	156.5	24.7	 16
 74	  2	118.3	20.1	 20
 75	  2	69.5	10.5	 16
 76	  2	118.0	104.8	 16
 77	  2	99.3	11.7	 16
 78	  2	87.0	15.6	 16
 79	  2	71.0	24.6	 16
 80	  2	64.8	10.9	 16
 81	  2	137.8	22.2	 16
 82	  2	292.8	49.1	 16
 83	  2	161.8	27.9	 16
 84	  2	124.0	18.8	 16
 85	  2	67.5	12.9	 16
 86	  2	65.0	13.8	 16
 87	  2	182.0	17.9	 16
 88	  2	94.0	11.9	 16
 89	  2	279.0	20.6	 16
 90	  2	85.5	12.7	 16
 91	  2	95.5	18.1	 16
 92	  2	87.5	13.2	 16
 93	  2	121.0	19.1	 16
 94	  2	130.3	23.4	 16
 95	  2	225.0	23.3	 16
 96	  2	74.3	9.3	 16
 97	  2	87.8	14.1	 16
 98	  2	101.5	18.5	 16
 99	  2	215.3	36.2	 16
100	  2	223.0	36.9	 16
101	  2	80.0	16.3	 16
102	  2	62.3	9.5	 16
103	  2	81.8	19.9	 16
104	  2	98.0	18.3	 16
105	  2	378.0	34.8	 16
106	  2	94.3	13.5	 16
107	  2	90.0	13.7	 16
108	  2	90.3	16.6	 16
109	  2	60.3	10.5	 16
110	  2	103.3	18.2	 16
111	  2	168.3	19.1	 16
112	  2	141.8	19.9	 16
113	  2	112.5	20.0	 16
114	  2	116.5	18.8	 16
115	  2	104.0	14.5	 16
116	  2	135.0	22.0	 16
117	  2	114.3	15.3	 16
118	  2	111.0	17.7	 16
119	  2	234.8	24.1	 16
120	  2	103.0	15.5	 16
121	  2	108.8	24.2	 16
122	  2	53.3	9.3	 16
123	  2	98.3	13.9	 16
124	  2	77.0	14.4	 16
125	  2	178.3	23.6	 16
126	  2	147.5	21.3	 16
127	  2	228.8	30.5	 16
128	  2	188.8	25.7	 16
129	  2	71.0	17.9	 16
130	  2	173.3	20.0	 16
131	  2	125.0	22.0	 16
132	  2	168.3	17.8	 16
133	  2	218.3	29.7	 16
134	  2	167.5	30.5	 16
135	  2	82.0	18.2	 16
136	  2	96.3	15.5	 16
137	  2	81.5	11.6	 16
138	  2	67.0	12.0	 16
139	  2	88.0	15.3	 16
140	  2	75.5	17.0	 16
141	  2	68.5	12.3	 16
142	  2	320.5	30.5	 16
143	  2	111.3	13.2	 16
144	  2	290.8	33.8	 16
145	  2	82.3	9.5	 16
146	  2	107.8	11.0	 16
147	  2	86.8	14.2	 16
148	  2	276.3	42.0	 16
149	  2	104.8	13.3	 16
150	  2	75.3	17.0	 16
151	  2	94.3	13.1	 16
152	  2	98.8	16.2	 16
153	  2	106.3	12.4	 16
154	  2	57.5	8.1	 16
155	  2	77.0	11.4	 16
156	  2	121.3	23.7	 16
157	  2	207.0	33.7	 16
158	  2	82.3	14.0	 16
159	  2	153.8	19.6	 16
160	  2	265.5	45.5	 16
161	  2	184.0	30.7	 16
162	  2	70.0	10.0	 16
163	  2	116.5	19.9	 16
164	  2	147.5	19.8	 16
165	  2	121.3	19.1	 16
166	  2	210.0	61.2	 16
167	  2	304.3	59.3	 16
168	  2	93.3	19.3	 16
169	  2	71.5	12.3	 16
170	  2	141.5	21.3	 16
171	  2	78.0	10.0	 16
172	  2	114.5	23.0	 16
173	  2	76.3	13.1	 16
174	  2	106.3	17.7	 16
175	  2	232.3	40.2	 16
176	  2	149.3	20.7	 16
177	  2	53.0	10.1	 16
178	  2	191.5	39.3	 16
179	  2	155.5	27.1	 16
180	  2	85.5	18.2	 16
181	  2	119.0	97.9	 16
182	  2	80.0	14.4	 16
183	  2	78.8	9.4	 16
184	  2	77.5	15.1	 16
185	  2	71.3	18.9	 16
186	  2	100.3	17.7	 16
187	  2	146.0	18.4	 16
188	  2	98.5	18.0	 16
189	  2	125.8	25.3	 16
190	  2	172.3	22.6	 16
191	  2	93.3	18.5	 16
192	  2	197.8	20.5	 16
193	  2	333.0	53.2	 16
194	  2	146.5	37.3	 16
195	  2	185.0	19.0	 16
196	  2	139.0	15.1	 16
197	  2	97.0	13.9	 16
198	  2	92.0	16.5	 16
199	  2	184.0	23.9	 16
200	  2	99.0	31.5	 16
201	  2	63.3	10.4	 16
202	  2	138.3	18.7	 16
203	  2	139.0	22.1	 16
204	  2	70.8	18.6	 16
205	  2	91.5	14.2	 16
206	  2	166.5	20.3	 16
207	  2	132.5	15.9	 16
208	  2	70.3	15.2	 16
209	  2	76.5	13.2	 16
210	  2	76.0	18.2	 16
211	  2	88.3	13.6	 16
212	  2	57.3	10.3	 16
213	  2	68.0	10.2	 16
214	  2	99.0	14.2	 16
215	  2	111.3	19.1	 16
216	  2	96.8	17.1	 20
217	  2	221.0	30.5	 16
218	  2	217.8	33.1	 16
219	  2	101.3	17.3	 16
220	  2	78.0	15.8	 16
221	  2	153.3	20.9	 16
222	  2	74.3	10.1	 16
223	  2	91.3	13.6	 16
224	  2	71.5	18.4	 16
225	  2	67.8	14.1	 16
226	  2	104.3	16.1	 16
227	  2	122.5	17.7	 16
228	  2	77.0	10.9	 16
229	  2	80.5	21.9	 16
230	  2	218.3	30.4	 16
231	  2	74.8	11.4	 16
232	  2	64.3	13.6	 16
233	  2	76.8	11.6	 16
234	  2	67.3	9.8	 16
235	  2	47.0	7.8	 16
236	  2	416.3	78.9	 16
237	  2	43.3	9.4	 16
238	  2	68.5	11.6	 16
239	  2	48.3	8.2	 16
240	  2	93.3	11.9	 16
241	  2	93.0	48.9	 16
242	  2	77.0	14.3	 16
243	  2	119.3	18.9	 16
244	  2	215.3	68.8	 16
245	  2	184.8	20.5	 16
246	  2	201.3	25.3	 16
247	  2	224.8	26.4	 16
248	  2	77.8	14.9	 16
249	  2	97.0	13.7	 16
250	  2	93.3	14.6	 16
251	  2	102.0	14.5	 16
252	  2	56.5	11.1	 16
253	  2	71.3	13.1	 16
254	  2	72.0	16.0	 16
255	  2	75.5	15.1	 16
256	  2	107.3	21.3	 16
257	  2	69.0	10.6	 16
258	  2	104.5	20.5	 16
259	  2	73.8	13.1	 16
260	  2	95.0	53.4	 16
261	  2	109.3	16.8	 16
262	  2	80.3	12.5	 16
263	  2	108.8	19.6	 16
264	  2	178.5	26.9	 16
265	  2	78.3	13.3	 16
266	  2	78.3	12.8	 16
267	  2	232.0	43.1	 16
268	  2	190.0	21.7	 16
269	  2	76.0	11.2	 16
270	  2	76.5	12.4	 16
271	  2	63.8	12.0	 16
272	  2	83.3	14.7	 16
273	  2	150.5	19.5	 16
274	  2	85.8	42.6	 16
275	  2	124.5	16.9	 16
276	  2	253.8	34.4	 16
277	  2	96.8	12.5	 16
278	  2	111.5	19.6	 16
279	  2	270.3	27.7	 16
280	  2	107.5	33.0	 16
281	  2	80.0	13.5	 16
282	  2	131.3	68.6	 16
283	  2	200.3	18.5	 16
284	  2	88.8	17.0	 16
285	  2	167.0	24.6	 16
286	  2	150.0	24.4	 16
287	  2	117.8	18.8	 16
288	  2	84.0	13.4	 16
289	  2	165.3	30.2	 16
290	  2	158.3	13.0	 16
291	  2	77.5	17.5	 16
292	  2	378.0	44.1	 16
293	  2	205.8	26.0	 16
294	  2	102.8	21.0	 16
295	  2	107.0	24.0	 16
296	  2	78.3	14.1	 16
297	  2	71.3	12.9	 16
298	  2	132.0	17.3	 16
299	  2	78.0	21.2	 16
300	  2	68.8	15.6	 16
301	  2	58.0	10.8	 16
302	  2	75.0	14.2	 16
303	  2	152.5	24.4	 16
304	  2	74.3	12.6	 16
305	  2	64.3	13.0	 16
306	  2	86.8	15.5	 16
307	  2	77.0	10.5	 16
308	  2	98.0	18.8	 16
309	  2	114.3	15.5	 16
310	  2	81.8	16.5	 16
311	  2	146.8	30.9	 16
312	  2	61.0	8.8	 16
313	  2	124.5	15.0	 16
314	  2	92.0	14.0	 16
315	  2	98.3	16.8	 16
316	  2	62.3	8.7	 16
317	  2	161.5	25.0	 16
318	  2	83.8	16.9	 16
319	  2	127.0	13.3	 16
320	  2	149.3	18.8	 16
321	  2	152.0	21.1	 16
322	  2	70.0	15.3	 16
323	  2	97.0	16.7	 16
324	  2	90.3	16.1	 16
325	  2	68.5	11.7	 16
326	  2	86.8	19.1	 16
327	  2	95.3	17.9	 16
328	  2	128.3	25.0	 16
329	  2	595.0	42.8	 16
330	  2	140.0	22.6	 16
331	  2	116.8	19.6	 16
332	  2	63.5	9.3	 16
333	  2	150.5	17.4	 16
334	  2	138.8	23.7	 16
335	  2	90.0	12.8	 16
336	  2	137.5	27.1	 16
337	  2	112.5	19.4	 16
338	  2	92.0	16.6	 16
339	  2	65.5	9.7	 16
340	  2	58.0	9.8	 16
341	  2	88.0	12.6	 16
342	  2	194.5	22.4	 16
343	  2	131.0	18.7	 16
344	  2	126.8	18.7	 16
345	  2	343.5	48.0	 16
346	  2	127.5	12.9	 16
347	  2	201.3	35.6	 16
348	  2	351.3	35.1	 16
349	  2	308.8	26.3	 16
350	  2	86.3	16.3	 16
351	  2	74.3	14.9	 16
352	  2	177.5	30.0	 16
353	  2	82.3	17.1	 16
354	  2	2514.0	515.0	 16
355	  2	157.5	17.3	 16
356	  2	217.5	40.9	 16
357	  2	155.3	17.2	 16
358	  2	86.3	13.0	 16
359	  2	96.8	18.1	 20
360	  2	66.0	14.3	 16
361	  2	57.3	12.9	 16
362	  2	58.0	12.2	 16
363	  2	74.8	12.2	 16
364	  2	89.8	39.5	 16
365	  2	63.5	10.6	 16
366	  2	62.8	13.0	 16
367	  2	74.8	12.4	 16
368	  2	69.8	14.8	 16
369	  2	73.3	11.5	 16
370	  2	80.5	16.7	 16
371	  2	1853.5	210.1	 16
372	  2	115.3	20.8	 16
373	  2	159.3	38.4	 16
374	  2	100.3	10.4	 16
375	  2	77.8	12.1	 16
376	  2	142.3	21.0	 16
377	  2	81.3	57.4	 16
378	  2	95.3	15.3	 16
379	  2	112.0	19.5	 16
380	  2	75.0	13.5	 16
381	  2	91.3	11.1	 16
382	  2	237.8	36.6	 16
383	  2	211.3	16.2	 16
384	  2	104.8	16.5	 16
385	  2	80.0	12.5	 16
386	  2	51.3	5.0	 16
387	  2	70.3	11.7	 16
388	  2	55.0	9.0	 16
389	  2	83.0	37.1	 16
390	  2	77.5	22.7	 16
391	  2	119.5	16.5	 16
392	  2	93.0	21.7	 16
393	  2	78.0	35.4	 16
394	  2	83.0	13.0	 16
395	  2	171.8	24.9	 16
396	  2	277.3	36.2	 16
397	  2	83.3	19.3	 16
398	  2	160.3	19.3	 16
399	  2	142.5	18.0	 16
400	  2	128.0	21.0	 16
401	  2	77.3	12.3	 16
402	  2	113.5	22.0	 16
403	  2	103.0	18.0	 16
404	  2	502.3	54.6	 16
405	  2	618.0	79.9	 16
406	  2	183.3	25.0	 16
407	  2	155.0	23.2	 16
408	  2	177.0	19.1	 16
409	  2	94.5	21.0	 16
410	  2	143.5	25.5	 16
411	  2	133.8	19.2	 16
412	  2	297.0	35.7	 16
413	  2	189.5	13.0	 16
414	  2	299.0	33.1	 16
415	  2	81.8	15.0	 16
416	  2	83.5	14.1	 16
417	  2	102.0	12.5	 16
418	  2	165.0	22.8	 16
419	  2	92.5	12.0	 16
420	  2	203.0	22.5	 16
421	  2	137.0	14.8	 16
422	  2	227.8	27.7	 16
423	  2	392.3	31.3	 16
424	  2	69.8	10.3	 16
425	  2	98.3	16.8	 16
426	  2	63.3	14.6	 16
427	  2	57.0	8.8	 16
428	  2	82.8	17.7	 16
429	  2	69.3	19.5	 16
430	  2	58.5	11.8	 16
431	  2	140.8	20.9	 16
432	  2	142.8	35.4	 16
433	  2	149.3	22.0	 16
434	  2	165.0	22.3	 16
435	  2	71.0	10.3	 16
436	  2	59.5	10.1	 16
437	  2	65.5	11.2	 16
438	  2	50.3	8.0	 16
439	  2	82.0	14.4	 16
440	  2	81.3	18.8	 16
441	  2	112.3	20.6	 16
442	  2	96.5	30.5	 16
443	  2	69.0	7.1	 16
444	  2	95.0	17.0	 16
445	  2	84.0	15.5	 16
446	  2	75.8	14.7	 16
447	  2	69.0	16.0	 16
448	  2	59.0	12.6	 16
449	  2	81.3	20.0	 16
450	  2	83.3	17.6	 16
451	  2	138.3	14.7	 16
452	  2	229.3	20.0	 16
453	  2	231.8	38.3	 16
454	  2	176.0	23.7	 16
455	  2	100.5	16.6	 16
456	  2	362.8	35.4	 16
457	  2	615.3	55.7	 16
458	  2	161.5	32.7	 16
459	  2	86.3	10.8	 16
460	  2	238.8	35.3	 16
461	  2	159.5	16.9	 16
462	  2	54.8	9.8	 16
463	  2	73.3	14.8	 16
464	  2	131.8	21.8	 16
465	  2	367.0	37.3	 16
466	  2	122.5	21.9	 16
467	  2	217.8	29.3	 16
468	  2	211.8	33.0	 16
469	  2	87.8	19.4	 16
470	  2	215.8	25.7	 16
471	  2	67.0	13.6	 16
472	  2	55.5	11.3	 16
473	  2	1083.3	204.1	 16
474	  2	52.5	10.0	 16
475	  2	80.8	26.3	 16
476	  2	54.3	21.4	 16
477	  2	160.0	28.9	 16
478	  2	86.5	21.0	 16
479	  2	78.5	14.0	 16
480	  2	59.3	9.0	 16
481	  2	61.0	9.1	 16
482	  2	109.3	15.4	 16
483	  2	76.3	11.1	 16
484	  2	113.0	18.2	 16
485	  2	138.0	10.5	 16
486	  2	72.3	13.3	 16
487	  2	71.3	12.1	 16
488	  2	64.3	11.9	 16
489	  2	66.8	12.0	 16
490	  2	112.3	16.7	 16
491	  2	95.3	14.8	 16
492	  2	74.5	25.6	 16
493	  2	165.3	24.3	 16
494	  2	92.5	9.3	 16
495	  2	80.3	12.8	 16
496	  2	129.3	15.6	 16
497	  2	310.8	44.9	 16
498	  2	61.0	11.0	 16
499	  2	63.0	15.8	 16
500	  2	73.5	13.4	 16
501	  2	102.0	19.2	 20
502	  2	128.0	65.2	 16
503	  2	69.0	11.1	 16
504	  2	64.8	16.8	 16
505	  2	64.8	11.0	 16
506	  2	321.5	29.4	 16
507	  2	114.5	22.0	 16
508	  2	115.5	16.3	 16
509	  2	148.5	16.9	 16
510	  2	200.0	26.0	 16
511	  2	237.3	35.9	 16
512	  2	77.3	12.9	 16
513	  2	229.3	39.0	 16
514	  2	116.3	16.7	 16
515	  2	75.0	12.9	 16
516	  2	74.3	11.4	 16
517	  2	109.8	21.6	 16
518	  2	244.5	24.8	 16
519	  2	167.0	24.8	 16
520	  2	70.5	11.6	 16
521	  2	56.0	9.2	 16
522	  2	88.5	24.1	 16
523	  2	74.3	18.1	 16
524	  2	638.0	73.6	 16
525	  2	305.3	34.5	 16
526	  2	226.8	21.7	 16
527	  2	108.3	15.3	 16
528	  2	99.5	15.9	 16
529	  2	126.3	26.5	 16
530	  2	109.3	16.6	 16
531	  2	63.5	8.4	 16
532	  2	52.0	9.4	 16
533	  2	119.3	27.7	 16
534	  2	131.5	19.6	 16
535	  2	75.5	17.5	 16
536	  2	97.8	60.8	 16
537	  2	76.8	13.9	 16
538	  2	117.0	24.8	 16
539	  2	119.3	41.6	 16
540	  2	121.8	17.3	 16
541	  2	93.5	14.1	 16
542	  2	200.3	36.1	 16
543	  2	341.8	33.8	 16
544	  2	190.0	28.7	 16
545	  2	178.0	31.9	 16
546	  2	84.8	17.9	 16
547	  2	169.5	25.2	 16
548	  2	57.3	17.0	 16
549	  2	67.3	6.0	 16
550	  2	93.3	25.9	 16
551	  2	102.8	18.3	 16
552	  2	86.0	18.4	 16
553	  2	87.8	14.7	 16
554	  2	69.5	21.7	 16
555	  2	59.3	10.0	 16
556	  2	94.0	11.1	 16
557	  2	152.3	26.5	 16
558	  2	144.3	28.3	 16
559	  2	296.8	53.5	 16
560	  2	3322.0	340.9	 16
561	  2	156.8	36.5	 16
562	  2	162.8	26.2	 16
563	  2	115.0	22.5	 16
564	  2	124.5	19.6	 16
565	  2	163.5	19.9	 16
566	  2	108.3	14.8	 16
567	  2	62.5	13.5	 16
568	  2	154.3	24.7	 16
569	  2	112.8	13.5	 16
570	  2	75.0	16.8	 16
571	  2	85.3	36.4	 16
572	  2	49.3	9.4	 16
573	  2	153.8	28.1	 16
574	  2	86.8	14.8	 16
575	  2	72.8	14.9	 16
576	  2	110.0	49.2	 16
577	  2	59.8	8.2	 16
578	  2	109.3	17.0	 16
579	  2	116.3	14.5	 16
580	  2	186.3	21.2	 16
581	  2	115.5	16.2	 16
582	  2	148.0	22.9	 16
583	  2	318.8	66.5	 16
584	  2	133.5	17.7	 16
585	  2	88.3	13.1	 16
586	  2	153.8	24.8	 16
587	  2	91.8	14.2	 16
588	  2	75.5	13.7	 16
589	  2	171.3	30.3	 16
590	  2	129.3	20.1	 16
591	  2	73.3	15.2	 16
592	  2	96.0	16.5	 16
593	  2	79.5	13.9	 16
594	  2	77.5	15.9	 16
595	  2	82.3	12.4	 16
596	  2	221.5	25.5	 16
597	  2	284.5	27.9	 16
598	  2	283.0	34.5	 16
599	  2	259.0	35.8	 16
600	  2	212.3	15.2	 16
601	  2	248.5	66.4	 16
602	  2	162.3	23.7	 16
603	  2	128.5	21.8	 16
604	  2	154.0	25.3	 16
605	  2	72.3	12.5	 16
606	  2	61.3	9.0	 16
607	  2	91.5	19.5	 16
608	  2	128.3	22.6	 16
609	  2	610.3	214.9	 16
610	  2	128.0	14.4	 16
611	  2	70.8	17.5	 16
612	  2	100.8	12.3	 16
613	  2	75.8	13.7	 16
614	  2	111.0	20.7	 16
615	  2	77.3	12.0	 16
616	  2	68.3	10.1	 16
617	  2	97.3	18.3	 16
618	  2	88.5	16.1	 16
619	  2	68.0	12.1	 16
620	  2	130.5	18.9	 16
621	  2	88.0	17.4	 16
622	  2	148.0	25.4	 16
623	  2	95.8	19.5	 16
624	  2	121.5	17.5	 16
625	  2	110.3	19.4	 16
626	  2	236.5	39.8	 16
627	  2	97.5	15.5	 16
628	  2	606.8	62.9	 16
629	  2	105.8	22.3	 16
630	  2	108.0	14.1	 16
631	  2	86.8	21.4	 16
632	  2	156.0	31.7	 16
633	  2	158.8	25.7	 16
634	  2	73.3	13.0	 16
635	  2	70.5	14.1	 16
636	  2	89.0	14.4	 16
637	  2	210.3	30.5	 16
638	  2	103.3	17.1	 16
639	  2	92.3	19.8	 16
640	  2	132.5	21.7	 16
641	  2	147.3	25.5	 16
642	  2	107.8	22.3	 16
643	  2	153.0	29.8	 20
644	  2	274.8	43.7	 16
645	  2	70.0	10.4	 16
646	  2	86.3	13.7	 16
647	  2	115.8	20.0	 16
648	  2	72.5	9.1	 16
649	  2	87.0	19.0	 16
650	  2	127.0	18.5	 16
651	  2	84.0	23.1	 16
652	  2	88.5	14.2	 16
653	  2	90.3	14.8	 16
654	  2	90.3	15.9	 16
655	  2	203.5	55.3	 16
656	  2	58.8	9.7	 16
657	  2	248.8	30.6	 16
658	  2	54.5	8.2	 16
659	  2	138.5	27.5	 16
660	  2	87.5	13.6	 16
661	  2	85.0	14.9	 16
662	  2	73.0	23.8	 16
663	  2	117.3	15.8	 16
664	  2	92.0	15.2	 16
665	  2	56.3	18.9	 16
666	  2	93.5	56.4	 16
667	  2	572.8	61.0	 16
668	  2	132.5	19.1	 16
669	  2	116.5	16.3	 16
670	  2	111.0	24.9	 16
671	  2	113.3	14.8	 16
672	  2	184.3	14.4	 16
673	  2	134.0	20.4	 16
674	  2	310.3	27.4	 16
675	  2	131.0	19.9	 16
676	  2	205.0	25.7	 16
677	  2	131.5	21.1	 16
678	  2	154.8	30.7	 16
679	  2	205.3	38.1	 16
680	  2	776.3	109.5	 16
681	  2	72.3	12.5	 16
682	  2	85.0	16.9	 16
683	  2	112.8	27.5	 16
684	  2	331.5	31.1	 16
685	  2	100.3	16.5	 16
686	  2	355.0	35.2	 16
687	  2	140.3	22.0	 16
688	  2	100.8	8.7	 16
689	  2	96.5	20.7	 16
690	  2	63.3	14.8	 16
691	  2	219.3	35.5	 16
692	  2	354.8	33.3	 16
693	  2	92.0	48.8	 16
694	  2	74.5	16.0	 16
695	  2	97.5	19.4	 16
696	  2	70.0	14.8	 16
697	  2	93.3	13.9	 16
698	  2	82.3	18.1	 16
699	  2	60.3	10.6	 16
700	  2	62.5	10.2	 16
701	  2	71.3	12.7	 16
702	  2	330.8	50.6	 16
703	  2	235.8	26.0	 16
704	  2	261.5	32.0	 16
705	  2	221.5	64.8	 16
706	  2	84.5	11.9	 16
707	  2	56.3	10.9	 16
708	  2	131.3	39.4	 16
709	  2	9057.5	898.6	 16
710	  2	143.0	26.3	 16
711	  2	9510.5	915.6	 16
  0	  3	9567.8	1108.7	 16
  1	  3	107.8	18.0	 16
  2	  3	9010.3	982.9	 16
  3	  3	110.3	27.5	 16
  4	  3	70.5	16.7	 16
  5	  3	175.5	24.7	 16
  6	  3	73.5	13.9	 16
  7	  3	204.0	29.1	 16
  8	  3	64.3	10.9	 16
  9	  3	135.8	21.0	 16
 10	  3	141.8	24.3	 16
 11	  3	248.5	26.2	 16
 12	  3	128.8	22.3	 16
 13	  3	184.0	28.9	 16
 14	  3	120.8	16.0	 16
 15	  3	143.3	30.3	 16
 16	  3	360.3	78.5	 16
 17	  3	315.0	30.9	 16
 18	  3	500.8	60.9	 16
 19	  3	216.0	31.9	 16
 20	  3	134.3	22.9	 16
 21	  3	115.8	68.2	 16
 22	  3	150.3	21.5	 16
 23	  3	1697.3	138.6	 16
 24	  3	98.0	18.6	 16
 25	  3	178.3	16.0	 16
 26	  3	136.5	17.6	 16
 27	  3	126.5	20.3	 16
 28	  3	150.3	25.5	 16
 29	  3	130.5	21.5	 16
 30	  3	132.5	24.5	 16
 31	  3	205.0	27.2	 16
 32	  3	117.0	15.4	 16
 33	  3	210.0	30.7	 16
 34	  3	138.0	19.8	 16
 35	  3	151.8	33.8	 16
 36	  3	222.8	28.4	 16
 37	  3	495.3	37.8	 16
 38	  3	160.8	23.5	 16
 39	  3	87.8	13.5	 16
 40	  3	154.0	16.7	 16
 41	  3	488.0	55.2	 16
 42	  3	471.5	66.2	 16
 43	  3	118.3	82.3	 16
 44	  3	185.5	31.5	 16
 45	  3	83.5	9.0	 16
 46	  3	157.3	27.3	 16
 47	  3	282.0	97.3	 16
 48	  3	78.3	16.5	 16
 49	  3	98.5	17.6	 16
 50	  3	108.5	19.2	 16
 51	  3	183.0	27.3	 16
 52	  3	215.3	28.8	 16
 53	  3	93.8	11.8	 16
 54	  3	99.3	13.3	 16
 55	  3	154.5	17.8	 16
 56	  3	268.3	34.5	 16
 57	  3	179.3	18.2	 16
 58	  3	109.5	20.4	 16
 59	  3	220.5	30.2	 16
 60	  3	76.3	12.5	 16
 61	  3	203.0	26.7	 16
 62	  3	177.8	35.0	 16
 63	  3	117.0	20.9	 16
 64	  3	2490.5	545.6	 16
 65	  3	146.0	19.0	 16
 66	  3	110.3	16.0	 16
 67	  3	250.8	38.3	 16
 68	  3	80.8	12.8	 16
 69	  3	101.5	11.1	 16
 70	  3	228.3	37.0	 16
 71	  3	168.3	21.7	 16
 72	  3	136.0	21.1	 16
 73	  3	750.3	113.8	 16
 74	  3	138.0	27.0	 16
 75	  3	91.5	16.1	 20
 76	  3	73.0	10.4	 16
 77	  3	99.5	17.6	 16
 78	  3	142.8	20.0	 16
 79	  3	114.3	15.8	 16
 80	  3	83.5	13.2	 16
 81	  3	91.5	17.1	 16
 82	  3	79.3	13.7	 16
 83	  3	489.3	63.5	 16
 84	  3	252.0	35.0	 16
 85	  3	132.0	22.7	 16
 86	  3	140.3	108.3	 16
 87	  3	119.5	23.9	 16
 88	  3	258.3	37.0	 16
 89	  3	217.3	32.8	 16
 90	  3	152.0	21.3	 16
 91	  3	305.8	37.7	 16
 92	  3	297.5	34.6	 16
 93	  3	348.3	37.2	 16
 94	  3	374.5	82.4	 16
 95	  3	372.0	71.0	 16
 96	  3	224.5	31.2	 16
 97	  3	296.5	31.2	 16
 98	  3	184.3	28.9	 16
 99	  3	95.8	38.1	 16
100	  3	114.5	19.8	 16
101	  3	207.5	27.1	 16
102	  3	83.5	14.1	 16
103	  3	311.5	58.5	 16
104	  3	127.0	19.6	 16
105	  3	104.5	15.4	 16
106	  3	70.5	13.0	 16
107	  3	178.3	25.1	 16
108	  3	101.8	14.2	 16
109	  3	155.0	22.4	 16
110	  3	100.8	17.2	 16
111	  3	170.0	21.7	 16
112	  3	155.3	19.2	 16
113	  3	325.8	40.3	 16
114	  3	159.5	24.7	 16
115	  3	119.3	19.8	 16
116	  3	134.3	21.7	 16
117	  3	142.8	26.9	 16
118	  3	122.3	15.9	 16
119	  3	246.5	35.2	 16
120	  3	121.8	18.4	 16
121	  3	160.8	23.5	 16
122	  3	82.0	10.0	 16
123	  3	66.8	12.6	 16
124	  3	70.8	10.8	 16
125	  3	89.0	15.2	 16
126	  3	139.0	16.3	 16
127	  3	79.8	17.6	 16
128	  3	76.3	13.2	 16
129	  3	59.5	14.7	 16
130	  3	232.5	51.5	 16
131	  3	214.8	65.3	 16
132	  3	277.0	40.0	 16
133	  3	119.3	14.4	 16
134	  3	209.8	34.4	 16
135	  3	237.3	32.0	 16
136	  3	937.0	114.0	 16
137	  3	89.0	12.7	 16
138	  3	337.8	56.2	 16
139	  3	696.0	92.3	 16
140	  3	79.5	13.4	 16
141	  3	82.3	16.0	 16
142	  3	592.0	60.7	 16
143	  3	242.8	35.5	 16
144	  3	74.0	24.5	 16
145	  3	81.8	13.2	 16
146	  3	3196.0	525.3	 16
147	  3	660.5	89.5	 16
148	  3	175.3	21.1	 16
149	  3	113.8	45.5	 16
150	  3	78.0	13.4	 16
151	  3	204.0	30.7	 16
152	  3	333.8	94.2	 16
153	  3	159.0	26.9	 16
154	  3	67.0	11.4	 16
155	  3	552.0	113.8	 16
156	  3	84.3	12.4	 16
157	  3	208.3	128.8	 16
158	  3	89.5	15.0	 16
159	  3	169.3	26.8	 16
160	  3	195.3	27.3	 16
161	  3	268.8	29.3	 16
162	  3	2104.0	228.9	 16
163	  3	363.5	59.4	 16
164	  3	193.8	29.0	 16
165	  3	217.0	38.1	 16
166	  3	122.8	21.4	 16
167	  3	170.3	19.5	 16
168	  3	412.5	60.7	 16
169	  3	81.0	8.5	 16
170	  3	100.5	17.9	 16
171	  3	59.3	10.7	 16
172	  3	87.0	13.5	 16
173	  3	58.5	10.5	 16
174	  3	97.3	17.9	 16
175	  3	58.3	6.4	 16
176	  3	1066.5	185.7	 16
177	  3	62.0	9.7	 16
178	  3	73.0	16.1	 16
179	  3	155.3	18.6	 16
180	  3	192.8	26.9	 16
181	  3	70.5	13.8	 16
182	  3	97.3	18.1	 16
183	  3	121.0	24.1	 16
184	  3	84.3	18.0	 16
185	  3	86.8	15.5	 16
186	  3	65.0	9.8	 16
187	  3	62.0	14.1	 16
188	  3	63.3	11.6	 16
189	  3	87.8	19.8	 16
190	  3	110.3	16.4	 16
191	  3	237.3	61.3	 16
192	  3	157.3	23.1	 16
193	  3	123.5	23.8	 16
194	  3	191.8	32.7	 16
195	  3	209.3	38.7	 16
196	  3	136.5	11.9	 16
197	  3	132.0	76.6	 16
198	  3	138.0	24.8	 16
199	  3	126.8	18.5	 16
200	  3	123.3	18.3	 16
201	  3	207.3	37.2	 16
202	  3	981.5	187.6	 16
203	  3	95.3	13.9	 16
204	  3	83.3	17.6	 16
205	  3	86.0	14.7	 16
206	  3	103.5	51.0	 16
207	  3	230.5	73.4	 16
208	  3	70.5	11.2	 16
209	  3	108.3	25.3	 16
210	  3	83.3	15.8	 16
211	  3	68.0	11.6	 16
212	  3	77.0	15.7	 16
213	  3	81.0	11.3	 16
214	  3	63.3	9.5	 16
215	  3	196.8	33.5	 16
216	  3	75.3	14.1	 16
217	  3	126.3	19.5	 20
218	  3	112.5	12.1	 16
219	  3	126.3	20.7	 16
220	  3	123.5	19.9	 16
221	  3	151.8	21.4	 16
222	  3	59.8	12.1	 16
223	  3	105.3	20.1	 16
224	  3	62.3	11.3	 16
225	  3	99.5	18.6	 16
226	  3	122.3	18.7	 16
227	  3	93.5	14.5	 16
228	  3	92.0	15.6	 16
229	  3	88.3	45.8	 16
230	  3	544.5	150.2	 16
231	  3	137.8	32.2	 16
232	  3	60.8	14.1	 16
233	  3	80.5	13.0	 16
234	  3	60.3	10.9	 16
235	  3	46.0	6.8	 16
236	  3	50.3	10.0	 16
237	  3	41.8	9.9	 16
238	  3	46.0	10.7	 16
239	  3	50.0	10.4	 16
240	  3	138.5	14.6	 16
241	  3	124.8	26.1	 16
242	  3	73.8	11.6	 16
243	  3	255.8	31.3	 16
244	  3	91.3	19.1	 16
245	  3	133.3	29.1	 16
246	  3	174.5	16.9	 16
247	  3	74.5	12.9	 16
248	  3	68.3	11.9	 16
249	  3	73.3	10.7	 16
250	  3	116.3	19.9	 16
251	  3	108.0	20.0	 16
252	  3	156.3	26.4	 16
253	  3	82.0	15.0	 16
254	  3	71.8	12.9	 16
255	  3	156.0	85.5	 16
256	  3	86.5	16.4	 16
257	  3	73.3	15.6	 16
258	  3	141.5	18.8	 16
259	  3	86.3	18.8	 16
260	  3	64.0	9.1	 16
261	  3	60.0	11.3	 16
262	  3	63.0	11.1	 16
263	  3	87.0	16.1	 16
264	  3	286.5	38.6	 16
265	  3	104.5	21.5	 16
266	  3	191.0	36.0	 16
267	  3	111.3	18.3	 16
268	  3	92.8	36.4	 16
269	  3	192.0	24.6	 16
270	  3	161.3	26.8	 16
271	  3	99.5	17.6	 16
272	  3	97.5	18.1	 16
273	  3	293.0	34.0	 16
274	  3	433.3	73.1	 16
275	  3	200.3	24.8	 16
276	  3	118.8	17.8	 16
277	  3	189.8	30.4	 16
278	  3	144.3	25.9	 16
279	  3	178.0	33.0	 16
280	  3	99.8	14.5	 16
281	  3	62.0	11.4	 16
282	  3	126.8	20.3	 16
283	  3	149.0	67.4	 16
284	  3	102.5	23.0	 16
285	  3	157.5	16.5	 16
286	  3	104.5	13.6	 16
287	  3	101.5	16.5	 16
288	  3	162.0	34.7	 16
289	  3	95.8	22.5	 16
290	  3	126.5	22.0	 16
291	  3	70.0	15.0	 16
292	  3	118.5	21.0	 16
293	  3	590.0	47.9	 16
294	  3	217.3	32.9	 16
295	  3	115.8	19.1	 16
296	  3	140.8	21.0	 16
297	  3	1317.8	194.7	 16
298	  3	239.3	24.2	 16
299	  3	273.8	25.3	 16
300	  3	209.8	23.7	 16
301	  3	110.0	11.2	 16
302	  3	75.0	15.0	 16
303	  3	68.0	11.3	 16
304	  3	102.3	20.3	 16
305	  3	65.0	10.2	 16
306	  3	73.5	10.4	 16
307	  3	119.3	17.9	 16
308	  3	87.5	37.5	 16
309	  3	2166.5	398.0	 16
310	  3	2345.3	295.3	 16
311	  3	177.8	24.9	 16
312	  3	251.3	34.5	 16
313	  3	255.0	32.3	 16
314	  3	129.8	18.7	 16
315	  3	400.5	70.0	 16
316	  3	438.0	64.2	 16
317	  3	174.8	25.6	 16
318	  3	153.5	32.8	 16
319	  3	72.3	16.4	 16
320	  3	146.5	34.6	 16
321	  3	192.8	25.0	 16
322	  3	111.0	20.1	 16
323	  3	132.8	18.2	 16
324	  3	191.3	17.2	 16
325	  3	109.3	19.5	 16
326	  3	591.8	146.6	 16
327	  3	100.0	38.3	 16
328	  3	130.5	29.2	 16
329	  3	341.8	45.5	 16
330	  3	84.3	14.2	 16
331	  3	70.3	13.3	 16
332	  3	58.3	19.8	 16
333	  3	65.5	11.1	 16
334	  3	102.3	20.6	 16
335	  3	63.8	13.4	 16
336	  3	66.0	15.7	 16
337	  3	68.3	11.2	 16
338	  3	76.5	19.2	 16
339	  3	71.0	38.1	 16
340	  3	76.5	11.1	 16
341	  3	1305.8	155.0	 16
342	  3	99.3	11.5	 16
343	  3	98.5	23.5	 16
344	  3	150.5	21.9	 16
345	  3	198.5	32.7	 16
346	  3	133.0	21.0	 16
347	  3	88.3	22.1	 16
348	  3	489.3	87.2	 16
349	  3	293.0	96.7	 16
350	  3	94.0	13.5	 16
351	  3	92.8	14.0	 16
352	  3	82.3	13.5	 16
353	  3	66.3	11.4	 16
354	  3	119.5	18.3	 16
355	  3	102.5	15.0	 16
356	  3	82.0	10.5	 16
357	  3	134.3	24.3	 16
358	  3	53.0	10.5	 16
359	  3	78.0	11.7	 16
360	  3	75.5	10.7	 20
361	  3	565.5	95.2	 16
362	  3	702.0	128.9	 16
363	  3	636.5	137.2	 16
364	  3	124.5	17.4	 16
365	  3	185.3	25.7	 16
366	  3	67.0	14.3	 16
367	  3	73.8	15.1	 16
368	  3	63.8	9.9	 16
369	  3	88.3	12.1	 16
370	  3	107.0	18.2	 16
371	  3	290.0	48.7	 16
372	  3	122.0	28.0	 16
373	  3	463.0	78.3	 16
374	  3	101.8	17.6	 16
375	  3	86.5	12.4	 16
376	  3	158.5	18.4	 16
377	  3	82.3	13.1	 16
378	  3	118.5	16.5	 16
379	  3	112.0	21.6	 16
380	  3	113.0	30.9	 16
381	  3	759.3	51.9	 16
382	  3	315.8	34.3	 16
383	  3	395.3	53.4	 16
384	  3	84.5	14.8	 16
385	  3	65.3	8.8	 16
386	  3	67.5	42.6	 16
387	  3	161.0	19.6	 16
388	  3	71.3	9.0	 16
389	  3	170.3	19.8	 16
390	  3	144.3	25.0	 16
391	  3	60.3	10.3	 16
392	  3	99.5	14.0	 16
393	  3	86.3	14.0	 16
394	  3	163.3	21.5	 16
395	  3	120.8	18.8	 16
396	  3	569.8	52.1	 16
397	  3	81.0	17.3	 16
398	  3	74.3	12.0	 16
399	  3	73.8	13.8	 16
400	  3	346.0	54.0	 16
401	  3	150.3	18.2	 16
402	  3	115.3	22.4	 16
403	  3	58.5	13.2	 16
404	  3	66.0	10.1	 16
405	  3	244.3	33.5	 16
406	  3	152.3	27.2	 16
407	  3	108.0	20.8	 16
408	  3	90.0	13.7	 16
409	  3	136.8	17.7	 16
410	  3	132.5	26.5	 16
411	  3	255.0	48.2	 16
412	  3	212.8	24.3	 16
413	  3	512.3	70.3	 16
414	  3	73.3	15.5	 16
415	  3	78.0	15.0	 16
416	  3	124.3	19.5	 16
417	  3	104.5	14.4	 16
418	  3	73.8	18.0	 16
419	  3	103.0	20.4	 16
420	  3	64.0	9.8	 16
421	  3	441.3	100.2	 16
422	  3	408.0	74.0	 16
423	  3	114.5	15.2	 16
424	  3	81.0	16.2	 16
425	  3	610.3	55.1	 16
426	  3	63.5	14.4	 16
427	  3	75.3	13.7	 16
428	  3	58.5	8.6	 16
429	  3	493.0	55.8	 16
430	  3	135.3	20.4	 16
431	  3	79.8	17.1	 16
432	  3	79.5	12.6	 16
433	  3	403.3	48.3	 16
434	  3	86.3	18.1	 16
435	  3	73.8	13.1	 16
436	  3	80.8	25.3	 16
437	  3	67.3	9.2	 16
438	  3	80.0	14.1	 16
439	  3	83.3	15.6	 16
440	  3	69.0	9.0	 16
441	  3	96.3	14.7	 16
442	  3	217.3	24.8	 16
443	  3	352.8	42.4	 16
444	  3	85.3	16.1	 16
445	  3	66.5	13.5	 16
446	  3	60.5	8.7	 16
447	  3	59.8	9.7	 16
448	  3	115.8	23.0	 16
449	  3	69.3	10.6	 16
450	  3	137.3	18.4	 16
451	  3	64.3	11.6	 16
452	  3	242.8	49.7	 16
453	  3	518.3	61.6	 16
454	  3	677.0	81.5	 16
455	  3	250.3	28.1	 16
456	  3	348.3	37.0	 16
457	  3	106.0	14.0	 16
458	  3	75.0	15.9	 16
459	  3	112.3	22.2	 16
460	  3	233.3	21.2	 16
461	  3	447.8	32.0	 16
462	  3	72.3	10.0	 16
463	  3	63.3	10.8	 16
464	  3	707.3	83.9	 16
465	  3	1619.0	152.6	 16
466	  3	1590.3	152.8	 16
467	  3	1373.0	135.9	 16
468	  3	113.5	24.5	 16
469	  3	81.8	15.8	 16
470	  3	288.8	38.1	 16
471	  3	66.3	8.4	 16
472	  3	49.8	10.6	 16
473	  3	50.3	11.7	 16
474	  3	41.3	8.9	 16
475	  3	39.3	8.3	 16
476	  3	46.3	8.1	 16
477	  3	142.3	18.7	 16
478	  3	89.5	17.5	 16
479	  3	81.3	11.7	 16
480	  3	66.3	9.3	 16
481	  3	65.3	10.5	 16
482	  3	104.8	23.8	 16
483	  3	152.3	25.8	 16
484	  3	103.3	23.3	 16
485	  3	177.5	20.2	 16
486	  3	96.3	15.8	 16
487	  3	66.5	13.2	 16
488	  3	148.0	19.2	 16
489	  3	66.8	10.6	 16
490	  3	55.3	9.7	 16
491	  3	80.8	9.2	 16
492	  3	99.5	11.1	 16
493	  3	130.8	25.3	 16
494	  3	99.0	19.6	 16
495	  3	411.5	58.5	 16
496	  3	242.3	36.1	 16
497	  3	288.0	28.4	 16
498	  3	76.3	12.6	 16
499	  3	88.0	17.9	 16
500	  3	115.5	17.6	 16
501	  3	122.0	22.0	 16
502	  3	248.3	41.0	 20
503	  3	71.0	13.1	 16
504	  3	61.0	8.9	 16
505	  3	2604.3	664.5	 16
506	  3	187.3	30.5	 16
507	  3	131.8	23.4	 16
508	  3	93.3	14.5	 16
509	  3	120.3	16.9	 16
510	  3	181.0	29.7	 16
511	  3	124.0	23.2	 16
512	  3	257.3	40.9	 16
513	  3	68.8	11.9	 16
514	  3	61.3	10.4	 16
515	  3	70.3	12.1	 16
516	  3	166.3	26.2	 16
517	  3	109.0	18.9	 16
518	  3	92.5	13.2	 16
519	  3	144.8	33.0	 16
520	  3	71.3	14.1	 16
521	  3	84.3	13.9	 16
522	  3	242.0	27.9	 16
523	  3	195.8	31.2	 16
524	  3	199.5	32.6	 16
525	  3	64.0	9.9	 16
526	  3	70.3	9.0	 16
527	  3	62.8	14.0	 16
528	  3	91.5	60.5	 16
529	  3	62.0	10.6	 16
530	  3	60.5	11.5	 16
531	  3	58.8	9.7	 16
532	  3	78.3	12.9	 16
533	  3	68.3	14.6	 16
534	  3	123.3	12.9	 16
535	  3	239.8	34.6	 16
536	  3	140.8	26.4	 16
537	  3	102.5	14.0	 16
538	  3	86.3	14.6	 16
539	  3	388.5	55.1	 16
540	  3	77.5	13.2	 16
541	  3	94.3	14.1	 16
542	  3	145.3	16.7	 16
543	  3	203.3	26.4	 16
544	  3	251.8	30.2	 16
545	  3	209.8	28.6	 16
546	  3	98.3	16.4	 16
547	  3	155.3	31.8	 16
548	  3	339.0	34.8	 16
549	  3	102.0	19.9	 16
550	  3	82.3	13.3	 16
551	  3	72.5	13.6	 16
552	  3	215.5	45.9	 16
553	  3	69.0	11.9	 16
554	  3	1356.3	287.4	 16
555	  3	76.3	12.4	 16
556	  3	93.0	15.1	 16
557	  3	81.5	16.3	 16
558	  3	511.5	96.5	 16
559	  3	176.8	28.6	 16
560	  3	823.5	133.0	 16
561	  3	558.8	53.9	 16
562	  3	306.5	58.4	 16
563	  3	141.3	16.9	 16
564	  3	264.0	33.0	 16
565	  3	166.3	22.7	 16
566	  3	320.3	43.5	 16
567	  3	64.0	11.2	 16
568	  3	129.5	23.2	 16
569	  3	94.3	16.2	 16
570	  3	69.8	10.2	 16
571	  3	71.0	15.3	 16
572	  3	223.0	41.5	 16
573	  3	87.8	13.0	 16
574	  3	98.0	15.1	 16
575	  3	198.5	35.5	 16
576	  3	125.3	17.9	 16
577	  3	182.3	23.5	 16
578	  3	83.0	13.6	 16
579	  3	96.0	22.1	 16
580	  3	95.3	16.2	 16
581	  3	118.3	19.4	 16
582	  3	104.5	16.3	 16
583	  3	188.8	23.7	 16
584	  3	214.0	39.1	 16
585	  3	120.0	16.9	 16
586	  3	151.3	18.2	 16
587	  3	101.3	14.7	 16
588	  3	114.5	19.6	 16
589	  3	124.3	18.5	 16
590	  3	201.3	26.4	 16
591	  3	97.8	16.2	 16
592	  3	167.3	22.2	 16
593	  3	185.8	43.8	 16
594	  3	119.8	68.5	 16
595	  3	154.0	48.2	 16
596	  3	128.5	19.7	 16
597	  3	116.0	26.2	 16
598	  3	148.8	27.4	 16
599	  3	157.5	27.6	 16
600	  3	255.5	30.0	 16
601	  3	211.5	18.6	 16
602	  3	306.5	30.3	 16
603	  3	452.8	54.8	 16
604	  3	119.3	18.1	 16
605	  3	389.3	66.5	 16
606	  3	104.5	20.3	 16
607	  3	113.8	18.2	 16
608	  3	135.8	22.0	 16
609	  3	122.0	41.0	 16
610	  3	375.5	36.3	 16
611	  3	203.0	56.2	 16
612	  3	147.8	31.2	 16
613	  3	54.3	12.5	 16
614	  3	126.3	20.0	 16
615	  3	63.3	11.7	 16
616	  3	118.0	15.1	 16
617	  3	177.5	43.2	 16
618	  3	91.0	14.0	 16
619	  3	70.5	9.7	 16
620	  3	989.8	191.3	 16
621	  3	72.3	9.7	 16
622	  3	56.3	16.3	 16
623	  3	78.0	12.4	 16
624	  3	56.0	9.6	 16
625	  3	119.0	23.2	 16
626	  3	110.5	20.9	 16
627	  3	676.0	150.3	 16
628	  3	626.8	95.2	 16
629	  3	218.8	28.3	 16
630	  3	115.8	18.4	 16
631	  3	371.0	71.6	 16
632	  3	84.5	15.1	 16
633	  3	149.0	19.8	 16
634	  3	113.5	21.1	 16
635	  3	122.3	24.0	 16
636	  3	124.5	23.3	 16
637	  3	412.0	86.6	 16
638	  3	88.5	16.9	 16
639	  3	217.3	43.5	 16
640	  3	195.8	52.4	 16
641	  3	85.8	14.0	 16
642	  3	66.5	12.8	 16
643	  3	88.5	12.9	 16
644	  3	133.8	23.8	 20
645	  3	250.0	34.4	 16
646	  3	1808.3	172.2	 16
647	  3	62.8	12.8	 16
648	  3	131.8	20.0	 16
649	  3	84.3	12.7	 16
650	  3	62.5	16.0	 16
651	  3	97.3	53.7	 16
652	  3	81.8	13.0	 16
653	  3	79.0	12.6	 16
654	  3	62.0	12.8	 16
655	  3	101.5	22.7	 16
656	  3	96.3	17.3	 16
657	  3	65.8	15.0	 16
658	  3	58.0	12.6	 16
659	  3	66.5	8.9	 16
660	  3	107.0	16.6	 16
661	  3	264.3	33.8	 16
662	  3	195.3	28.4	 16
663	  3	347.8	115.2	 16
664	  3	73.3	12.6	 16
665	  3	180.0	23.7	 16
666	  3	427.0	41.0	 16
667	  3	77.0	12.6	 16
668	  3	137.0	17.8	 16
669	  3	91.5	13.8	 16
670	  3	126.8	61.7	 16
671	  3	327.8	24.4	 16
672	  3	138.8	16.7	 16
673	  3	567.0	52.3	 16
674	  3	181.8	26.6	 16
675	  3	167.3	21.1	 16
676	  3	176.5	21.1	 16
677	  3	164.3	27.9	 16
678	  3	57.3	12.1	 16
679	  3	87.0	17.1	 16
680	  3	116.5	19.9	 16
681	  3	82.8	19.8	 16
682	  3	219.5	110.0	 16
683	  3	86.5	13.7	 16
684	  3	80.5	13.5	 16
685	  3	114.5	17.5	 16
686	  3	234.8	30.9	 16
687	  3	94.5	14.9	 16
688	  3	70.5	11.2	 16
689	  3	117.5	91.6	 16
690	  3	1011.5	130.7	 16
691	  3	148.8	28.5	 16
692	  3	346.3	48.5	 16
693	  3	110.3	15.6	 16
694	  3	174.3	17.2	 16
695	  3	193.5	24.6	 16
696	  3	265.3	33.8	 16
697	  3	81.0	18.8	 16
698	  3	88.3	14.4	 16
699	  3	135.8	17.8	 16
700	  3	744.3	117.4	 16
701	  3	260.0	27.8	 16
702	  3	139.3	18.5	 16
703	  3	201.3	23.1	 16
704	  3	267.3	45.5	 16
705	  3	322.5	36.1	 16
706	  3	85.3	9.7	 16
707	  3	65.0	13.0	 16
708	  3	9391.3	820.0	 16
709	  3	131.0	17.6	 16
710	  3	9029.0	798.4	 16
711	  3	127.8	27.6	 16
  0	  4	71.0	24.7	 16
  1	  4	58.8	14.8	 16
  2	  4	64.0	16.6	 16
  3	  4	55.0	12.7	 16
  4	  4	54.5	10.7	 16
  5	  4	146.0	23.0	 16
  6	  4	78.0	15.1	 16
  7	  4	158.8	20.7	 16
  8	  4	80.8	15.4	 16
  9	  4	88.3	18.0	 16
 10	  4	90.0	14.3	 16
 11	  4	185.3	20.6	 16
 12	  4	86.0	26.4	 16
 13	  4	194.3	22.9	 16
 14	  4	97.8	17.6	 16
 15	  4	198.0	32.8	 16
 16	  4	195.8	26.8	 16
 17	  4	1079.0	79.5	 16
 18	  4	660.5	33.1	 16
 19	  4	435.5	34.2	 16
 20	  4	101.0	15.5	 16
 21	  4	76.3	14.1	 16
 22	  4	185.5	31.4	 16
 23	  4	262.3	48.5	 16
 24	  4	94.0	17.7	 16
 25	  4	149.3	13.8	 16
 26	  4	118.3	16.7	 16
 27	  4	130.5	17.9	 16
 28	  4	147.3	31.2	 16
 29	  4	128.3	21.8	 16
 30	  4	181.8	49.5	 16
 31	  4	171.5	17.9	 16
 32	  4	127.8	20.1	 16
 33	  4	113.5	12.6	 16
 34	  4	142.5	20.6	 16
 35	  4	287.3	29.9	 16
 36	  4	131.8	15.8	 16
 37	  4	161.3	21.2	 16
 38	  4	154.0	23.0	 16
 39	  4	108.3	24.0	 16
 40	  4	135.3	28.5	 16
 41	  4	137.5	19.9	 16
 42	  4	150.3	18.7	 16
 43	  4	134.0	25.9	 16
 44	  4	110.3	17.3	 16
 45	  4	100.3	17.8	 16
 46	  4	191.5	24.2	 16
 47	  4	190.0	19.8	 16
 48	  4	86.8	23.0	 16
 49	  4	102.8	17.6	 16
 50	  4	185.0	25.5	 16
 51	  4	156.0	20.2	 16
 52	  4	122.0	23.2	 16
 53	  4	102.0	12.9	 16
 54	  4	133.8	13.8	 16
 55	  4	202.5	26.3	 16
 56	  4	230.3	20.9	 16
 57	  4	173.5	29.8	 16
 58	  4	115.0	17.1	 16
 59	  4	128.3	26.1	 16
 60	  4	91.3	16.1	 16
 61	  4	198.8	27.6	 16
 62	  4	103.0	16.8	 16
 63	  4	238.0	47.3	 16
 64	  4	917.0	137.4	 16
 65	  4	125.3	18.4	 16
 66	  4	104.3	15.3	 16
 67	  4	234.5	33.6	 16
 68	  4	94.5	17.4	 16
 69	  4	129.8	21.0	 16
 70	  4	173.0	22.1	 16
 71	  4	116.3	12.8	 16
 72	  4	129.3	11.7	 16
 73	  4	307.0	35.5	 16
 74	  4	159.0	15.1	 16
 75	  4	162.5	125.0	 16
 76	  4	77.8	15.2	 20
 77	  4	95.5	14.0	 16
 78	  4	141.8	20.1	 16
 79	  4	102.8	15.0	 16
 80	  4	102.8	18.6	 16
 81	  4	91.5	10.6	 16
 82	  4	94.8	15.7	 16
 83	  4	335.3	57.3	 16
 84	  4	221.8	22.8	 16
 85	  4	126.8	27.6	 16
 86	  4	114.8	17.1	 16
 87	  4	249.5	33.2	 16
 88	  4	499.5	36.7	 16
 89	  4	289.8	33.5	 16
 90	  4	157.5	24.2	 16
 91	  4	244.5	53.3	 16
 92	  4	231.3	21.3	 16
 93	  4	221.0	27.8	 16
 94	  4	235.3	26.7	 16
 95	  4	227.8	103.9	 16
 96	  4	137.5	23.5	 16
 97	  4	296.0	35.9	 16
 98	  4	108.0	14.6	 16
 99	  4	91.0	27.0	 16
100	  4	130.0	21.6	 16
101	  4	289.8	31.4	 16
102	  4	80.5	10.1	 16
103	  4	130.5	17.5	 16
104	  4	179.8	20.7	 16
105	  4	141.0	27.8	 16
106	  4	83.0	15.9	 16
107	  4	158.3	18.1	 16
108	  4	79.0	10.4	 16
109	  4	156.5	18.1	 16
110	  4	85.0	12.2	 16
111	  4	92.0	17.0	 16
112	  4	156.8	15.8	 16
113	  4	133.8	20.0	 16
114	  4	128.3	23.0	 16
115	  4	101.3	13.2	 16
116	  4	104.3	49.1	 16
117	  4	120.5	15.6	 16
118	  4	117.0	26.0	 16
119	  4	165.0	19.5	 16
120	  4	172.8	20.9	 16
121	  4	122.3	19.1	 16
122	  4	82.0	11.4	 16
123	  4	72.5	13.2	 16
124	  4	69.8	12.1	 16
125	  4	82.5	16.2	 16
126	  4	97.8	15.0	 16
127	  4	77.5	13.6	 16
128	  4	66.5	10.0	 16
129	  4	63.0	11.9	 16
130	  4	90.3	19.1	 16
131	  4	481.3	74.2	 16
132	  4	291.8	39.3	 16
133	  4	106.0	15.1	 16
134	  4	232.0	26.6	 16
135	  4	138.8	16.9	 16
136	  4	323.8	42.9	 16
137	  4	80.8	15.5	 16
138	  4	121.5	25.9	 16
139	  4	296.5	26.4	 16
140	  4	79.5	14.2	 16
141	  4	104.5	44.2	 16
142	  4	335.0	34.8	 16
143	  4	261.3	103.9	 16
144	  4	61.8	9.1	 16
145	  4	87.3	92.3	 16
146	  4	1018.5	130.7	 16
147	  4	142.0	20.2	 16
148	  4	90.0	13.3	 16
149	  4	76.8	13.8	 16
150	  4	88.3	18.4	 16
151	  4	119.0	18.6	 16
152	  4	117.8	13.5	 16
153	  4	133.0	19.9	 16
154	  4	70.5	13.9	 16
155	  4	98.0	18.1	 16
156	  4	64.3	15.2	 16
157	  4	77.3	17.9	 16
158	  4	66.8	15.7	 16
159	  4	76.0	16.0	 16
160	  4	278.3	30.6	 16
161	  4	301.3	39.3	 16
162	  4	271.0	53.0	 16
163	  4	85.3	15.0	 16
164	  4	139.0	19.5	 16
165	  4	183.5	27.3	 16
166	  4	78.0	15.2	 16
167	  4	145.8	23.8	 16
168	  4	68.8	14.5	 16
169	  4	65.8	14.1	 16
170	  4	152.0	96.0	 16
171	  4	95.8	37.4	 16
172	  4	85.5	14.1	 16
173	  4	67.3	86.2	 16
174	  4	76.8	12.3	 16
175	  4	58.3	12.4	 16
176	  4	98.0	16.1	 16
177	  4	62.0	8.3	 16
178	  4	70.0	68.5	 16
179	  4	228.3	24.8	 16
180	  4	299.8	30.2	 16
181	  4	73.0	12.0	 16
182	  4	86.5	13.6	 16
183	  4	123.0	18.0	 16
184	  4	69.5	13.6	 16
185	  4	78.5	18.5	 16
186	  4	75.8	15.3	 16
187	  4	55.0	7.9	 16
188	  4	75.3	14.6	 16
189	  4	71.5	13.3	 16
190	  4	79.3	8.4	 16
191	  4	175.0	23.9	 16
192	  4	84.5	13.8	 16
193	  4	89.3	17.4	 16
194	  4	86.8	15.7	 16
195	  4	84.3	9.9	 16
196	  4	143.8	22.5	 16
197	  4	224.3	30.0	 16
198	  4	151.8	15.3	 16
199	  4	166.0	30.3	 16
200	  4	121.3	21.8	 16
201	  4	79.0	18.2	 16
202	  4	101.8	17.8	 16
203	  4	90.0	21.5	 16
204	  4	76.0	17.1	 16
205	  4	94.0	15.1	 16
206	  4	102.5	21.5	 16
207	  4	100.5	18.6	 16
208	  4	109.5	37.2	 16
209	  4	94.3	12.3	 16
210	  4	78.8	12.7	 16
211	  4	66.8	12.5	 16
212	  4	63.5	10.4	 16
213	  4	90.0	11.9	 16
214	  4	54.5	8.7	 16
215	  4	151.0	152.6	 16
216	  4	73.5	12.1	 16
217	  4	145.5	16.3	 16
218	  4	170.5	32.1	 20
219	  4	102.3	13.3	 16
220	  4	83.5	11.3	 16
221	  4	92.3	15.0	 16
222	  4	74.8	16.2	 16
223	  4	75.0	12.4	 16
224	  4	67.0	13.4	 16
225	  4	86.5	15.2	 16
226	  4	85.0	17.7	 16
227	  4	99.3	15.1	 16
228	  4	107.8	18.9	 16
229	  4	78.3	22.1	 16
230	  4	74.3	11.8	 16
231	  4	67.5	13.6	 16
232	  4	59.3	18.2	 16
233	  4	78.8	23.0	 16
234	  4	63.3	10.8	 16
235	  4	45.3	7.2	 16
236	  4	38.8	9.4	 16
237	  4	43.0	7.6	 16
238	  4	46.0	9.5	 16
239	  4	52.0	9.5	 16
240	  4	138.5	17.8	 16
241	  4	92.0	15.2	 16
242	  4	86.0	16.3	 16
243	  4	332.8	26.1	 16
244	  4	119.0	21.4	 16
245	  4	99.5	18.1	 16
246	  4	241.0	44.2	 16
247	  4	184.3	24.0	 16
248	  4	79.3	19.9	 16
249	  4	64.3	13.2	 16
250	  4	66.0	9.4	 16
251	  4	108.3	86.7	 16
252	  4	98.0	16.6	 16
253	  4	63.0	10.5	 16
254	  4	73.0	15.8	 16
255	  4	74.0	25.8	 16
256	  4	79.3	19.2	 16
257	  4	72.8	11.7	 16
258	  4	83.3	13.1	 16
259	  4	74.0	17.0	 16
260	  4	85.0	48.0	 16
261	  4	70.0	19.9	 16
262	  4	73.0	38.8	 16
263	  4	80.8	16.2	 16
264	  4	178.8	25.3	 16
265	  4	71.3	15.7	 16
266	  4	157.3	21.9	 16
267	  4	97.8	19.6	 16
268	  4	70.0	15.3	 16
269	  4	91.5	16.6	 16
270	  4	102.3	13.3	 16
271	  4	78.0	18.8	 16
272	  4	177.3	17.1	 16
273	  4	672.3	56.0	 16
274	  4	250.8	21.3	 16
275	  4	201.0	32.9	 16
276	  4	124.3	22.3	 16
277	  4	171.0	48.5	 16
278	  4	150.8	22.8	 16
279	  4	96.8	13.9	 16
280	  4	88.3	13.5	 16
281	  4	63.5	10.1	 16
282	  4	68.3	10.2	 16
283	  4	138.3	16.9	 16
284	  4	81.5	12.0	 16
285	  4	176.0	23.2	 16
286	  4	128.8	22.8	 16
287	  4	115.0	16.1	 16
288	  4	93.5	15.6	 16
289	  4	91.5	21.2	 16
290	  4	164.8	70.9	 16
291	  4	84.3	17.0	 16
292	  4	87.0	13.2	 16
293	  4	141.8	24.9	 16
294	  4	117.0	10.8	 16
295	  4	96.3	13.9	 16
296	  4	70.3	12.6	 16
297	  4	120.3	33.1	 16
298	  4	110.8	17.4	 16
299	  4	110.0	21.6	 16
300	  4	117.8	93.0	 16
301	  4	109.3	16.8	 16
302	  4	67.0	14.7	 16
303	  4	99.3	20.6	 16
304	  4	108.3	13.9	 16
305	  4	70.0	15.3	 16
306	  4	71.0	14.8	 16
307	  4	109.5	19.2	 16
308	  4	82.8	23.3	 16
309	  4	396.0	75.7	 16
310	  4	427.3	74.2	 16
311	  4	161.5	28.4	 16
312	  4	197.0	25.5	 16
313	  4	296.3	26.3	 16
314	  4	147.5	20.9	 16
315	  4	122.0	19.1	 16
316	  4	118.3	20.8	 16
317	  4	68.3	10.5	 16
318	  4	72.0	14.6	 16
319	  4	68.3	11.0	 16
320	  4	105.8	16.4	 16
321	  4	183.8	25.7	 16
322	  4	88.5	23.8	 16
323	  4	86.0	12.3	 16
324	  4	123.3	26.3	 16
325	  4	138.3	13.5	 16
326	  4	103.5	19.2	 16
327	  4	93.5	32.7	 16
328	  4	158.5	27.2	 16
329	  4	326.8	51.1	 16
330	  4	75.5	14.0	 16
331	  4	68.5	9.0	 16
332	  4	60.5	12.5	 16
333	  4	87.5	52.3	 16
334	  4	65.0	15.7	 16
335	  4	64.3	10.2	 16
336	  4	62.0	8.8	 16
337	  4	71.0	14.3	 16
338	  4	72.3	12.1	 16
339	  4	58.3	10.4	 16
340	  4	76.0	9.7	 16
341	  4	407.3	133.3	 16
342	  4	95.3	13.0	 16
343	  4	141.8	21.5	 16
344	  4	135.0	25.2	 16
345	  4	187.3	29.4	 16
346	  4	107.5	15.0	 16
347	  4	93.0	15.3	 16
348	  4	304.8	46.1	 16
349	  4	152.5	19.3	 16
350	  4	84.5	14.4	 16
351	  4	72.8	12.0	 16
352	  4	108.0	11.7	 16
353	  4	81.0	15.1	 16
354	  4	78.0	15.7	 16
355	  4	100.3	13.1	 16
356	  4	74.0	13.6	 16
357	  4	112.8	20.3	 16
358	  4	60.5	11.3	 16
359	  4	62.3	16.2	 16
360	  4	68.8	11.9	 16
361	  4	147.5	27.3	 20
362	  4	165.3	23.2	 16
363	  4	172.5	24.0	 16
364	  4	160.3	36.7	 16
365	  4	302.0	41.4	 16
366	  4	68.0	13.7	 16
367	  4	79.0	16.4	 16
368	  4	66.3	16.8	 16
369	  4	98.8	12.5	 16
370	  4	123.3	20.5	 16
371	  4	169.0	19.3	 16
372	  4	116.5	19.9	 16
373	  4	166.8	28.5	 16
374	  4	74.0	13.7	 16
375	  4	98.8	24.0	 16
376	  4	125.3	22.7	 16
377	  4	85.3	17.7	 16
378	  4	110.3	15.2	 16
379	  4	109.3	16.4	 16
380	  4	230.3	32.7	 16
381	  4	956.3	106.2	 16
382	  4	425.0	47.7	 16
383	  4	425.8	51.0	 16
384	  4	89.5	19.5	 16
385	  4	64.5	8.7	 16
386	  4	60.3	10.7	 16
387	  4	235.0	40.6	 16
388	  4	58.5	13.0	 16
389	  4	100.0	36.5	 16
390	  4	58.0	7.8	 16
391	  4	60.0	10.4	 16
392	  4	74.0	7.0	 16
393	  4	87.3	19.8	 16
394	  4	104.8	16.8	 16
395	  4	159.0	27.1	 16
396	  4	188.0	28.5	 16
397	  4	93.5	20.2	 16
398	  4	86.0	10.7	 16
399	  4	85.5	18.0	 16
400	  4	112.5	16.8	 16
401	  4	101.3	18.4	 16
402	  4	79.0	9.9	 16
403	  4	63.5	13.1	 16
404	  4	70.0	14.0	 16
405	  4	202.3	26.7	 16
406	  4	132.8	22.0	 16
407	  4	195.8	29.1	 16
408	  4	104.3	19.5	 16
409	  4	142.3	21.9	 16
410	  4	120.8	22.6	 16
411	  4	211.0	28.4	 16
412	  4	317.5	39.5	 16
413	  4	476.5	34.2	 16
414	  4	77.5	13.7	 16
415	  4	83.0	10.4	 16
416	  4	68.3	11.8	 16
417	  4	69.5	10.1	 16
418	  4	73.5	16.5	 16
419	  4	174.5	23.1	 16
420	  4	71.5	13.3	 16
421	  4	89.0	10.9	 16
422	  4	138.5	30.1	 16
423	  4	131.8	17.9	 16
424	  4	90.3	13.5	 16
425	  4	140.0	25.4	 16
426	  4	57.3	8.1	 16
427	  4	60.0	7.7	 16
428	  4	50.3	9.1	 16
429	  4	196.0	26.4	 16
430	  4	189.5	27.0	 16
431	  4	103.5	18.8	 16
432	  4	59.3	11.8	 16
433	  4	80.0	18.4	 16
434	  4	103.3	16.6	 16
435	  4	58.8	10.0	 16
436	  4	56.0	11.8	 16
437	  4	64.3	9.4	 16
438	  4	72.0	14.2	 16
439	  4	80.0	17.7	 16
440	  4	76.5	13.8	 16
441	  4	82.3	8.0	 16
442	  4	72.3	7.2	 16
443	  4	283.0	27.7	 16
444	  4	92.3	18.6	 16
445	  4	67.5	11.0	 16
446	  4	66.8	12.3	 16
447	  4	64.3	10.1	 16
448	  4	71.3	17.8	 16
449	  4	88.8	14.7	 16
450	  4	85.0	8.9	 16
451	  4	63.5	15.0	 16
452	  4	75.8	14.1	 16
453	  4	400.3	51.9	 16
454	  4	647.0	71.8	 16
455	  4	151.8	17.7	 16
456	  4	219.0	21.1	 16
457	  4	99.0	17.5	 16
458	  4	82.5	12.8	 16
459	  4	95.3	16.8	 16
460	  4	295.3	29.7	 16
461	  4	836.5	62.0	 16
462	  4	91.0	35.6	 16
463	  4	59.0	11.0	 16
464	  4	338.3	49.8	 16
465	  4	383.5	90.8	 16
466	  4	311.3	34.0	 16
467	  4	236.3	36.8	 16
468	  4	129.0	27.7	 16
469	  4	70.3	8.8	 16
470	  4	203.5	30.0	 16
471	  4	60.8	17.2	 16
472	  4	49.5	13.9	 16
473	  4	49.5	11.3	 16
474	  4	42.3	8.6	 16
475	  4	34.3	5.2	 16
476	  4	45.3	10.6	 16
477	  4	83.0	12.5	 16
478	  4	69.8	14.8	 16
479	  4	90.3	13.8	 16
480	  4	79.8	23.3	 16
481	  4	61.8	14.1	 16
482	  4	77.3	11.8	 16
483	  4	78.3	13.8	 16
484	  4	70.3	12.5	 16
485	  4	166.5	27.2	 16
486	  4	92.8	17.0	 16
487	  4	64.0	11.9	 16
488	  4	153.5	16.9	 16
489	  4	66.8	12.6	 16
490	  4	51.8	9.8	 16
491	  4	70.3	10.9	 16
492	  4	70.5	13.0	 16
493	  4	118.5	16.2	 16
494	  4	71.5	14.4	 16
495	  4	274.8	40.3	 16
496	  4	92.3	15.6	 16
497	  4	414.3	41.0	 16
498	  4	94.3	16.0	 16
499	  4	90.0	16.6	 16
500	  4	109.3	17.3	 16
501	  4	129.3	15.8	 16
502	  4	133.5	21.4	 16
503	  4	58.0	10.6	 20
504	  4	66.3	14.5	 16
505	  4	635.0	154.2	 16
506	  4	109.3	22.0	 16
507	  4	84.5	15.7	 16
508	  4	82.0	11.3	 16
509	  4	119.5	22.3	 16
510	  4	220.5	27.8	 16
511	  4	152.8	23.7	 16
512	  4	126.3	24.5	 16
513	  4	64.5	9.1	 16
514	  4	63.5	9.4	 16
515	  4	65.3	11.2	 16
516	  4	87.5	19.2	 16
517	  4	81.3	17.7	 16
518	  4	92.3	14.7	 16
519	  4	84.3	18.5	 16
520	  4	54.0	11.0	 16
521	  4	69.0	8.8	 16
522	  4	152.3	24.6	 16
523	  4	127.3	19.6	 16
524	  4	79.3	13.0	 16
525	  4	63.0	11.3	 16
526	  4	63.0	9.2	 16
527	  4	61.5	10.0	 16
528	  4	89.8	17.4	 16
529	  4	63.0	9.8	 16
530	  4	65.0	12.0	 16
531	  4	55.5	13.7	 16
532	  4	93.5	18.2	 16
533	  4	69.5	16.8	 16
534	  4	93.0	14.9	 16
535	  4	199.3	39.2	 16
536	  4	115.0	19.0	 16
537	  4	96.0	12.9	 16
538	  4	109.5	22.4	 16
539	  4	125.0	40.8	 16
540	  4	64.0	15.1	 16
541	  4	59.3	7.7	 16
542	  4	79.5	17.2	 16
543	  4	324.0	39.0	 16
544	  4	185.3	19.3	 16
545	  4	82.5	14.4	 16
546	  4	69.5	13.0	 16
547	  4	126.0	15.7	 16
548	  4	183.3	26.3	 16
549	  4	80.3	11.3	 16
550	  4	69.0	14.9	 16
551	  4	72.8	63.8	 16
552	  4	73.8	16.5	 16
553	  4	61.3	11.7	 16
554	  4	193.0	38.8	 16
555	  4	52.3	10.0	 16
556	  4	83.0	17.5	 16
557	  4	68.5	10.4	 16
558	  4	81.8	11.7	 16
559	  4	185.8	23.3	 16
560	  4	300.5	53.0	 16
561	  4	632.0	60.6	 16
562	  4	314.5	22.7	 16
563	  4	92.8	17.5	 16
564	  4	160.3	24.1	 16
565	  4	173.5	32.8	 16
566	  4	192.0	23.9	 16
567	  4	62.8	12.8	 16
568	  4	92.3	12.4	 16
569	  4	81.3	28.6	 16
570	  4	64.3	15.9	 16
571	  4	85.0	20.4	 16
572	  4	86.5	12.8	 16
573	  4	69.8	15.0	 16
574	  4	76.0	12.0	 16
575	  4	162.0	28.9	 16
576	  4	135.0	34.2	 16
577	  4	118.3	12.8	 16
578	  4	80.3	73.9	 16
579	  4	100.3	15.6	 16
580	  4	100.3	16.5	 16
581	  4	126.0	19.3	 16
582	  4	135.3	17.7	 16
583	  4	116.3	14.5	 16
584	  4	203.0	20.6	 16
585	  4	194.8	26.5	 16
586	  4	95.5	13.1	 16
587	  4	83.3	15.9	 16
588	  4	132.3	20.0	 16
589	  4	139.5	29.1	 16
590	  4	104.0	14.4	 16
591	  4	104.5	14.9	 16
592	  4	120.3	13.9	 16
593	  4	88.0	17.3	 16
594	  4	90.5	15.9	 16
595	  4	82.8	11.1	 16
596	  4	96.8	18.1	 16
597	  4	90.0	17.5	 16
598	  4	78.3	10.4	 16
599	  4	106.5	12.0	 16
600	  4	168.8	18.3	 16
601	  4	164.0	16.0	 16
602	  4	227.5	34.5	 16
603	  4	452.5	41.7	 16
604	  4	100.3	19.3	 16
605	  4	147.3	28.0	 16
606	  4	95.8	12.8	 16
607	  4	70.0	9.8	 16
608	  4	118.0	23.0	 16
609	  4	106.3	15.3	 16
610	  4	145.0	25.1	 16
611	  4	113.3	19.0	 16
612	  4	74.3	14.3	 16
613	  4	58.0	13.6	 16
614	  4	78.8	20.3	 16
615	  4	54.0	13.9	 16
616	  4	87.3	12.7	 16
617	  4	90.3	15.1	 16
618	  4	62.3	11.1	 16
619	  4	63.0	11.8	 16
620	  4	242.8	79.4	 16
621	  4	69.5	13.8	 16
622	  4	64.3	12.3	 16
623	  4	81.3	16.5	 16
624	  4	58.5	11.5	 16
625	  4	154.5	14.9	 16
626	  4	76.8	10.9	 16
627	  4	156.3	50.2	 16
628	  4	245.8	34.8	 16
629	  4	221.3	19.8	 16
630	  4	83.3	16.2	 16
631	  4	88.0	14.8	 16
632	  4	86.5	14.0	 16
633	  4	140.8	25.9	 16
634	  4	95.8	16.8	 16
635	  4	97.8	17.2	 16
636	  4	120.0	15.3	 16
637	  4	177.0	36.4	 16
638	  4	91.5	21.7	 16
639	  4	80.8	13.4	 16
640	  4	83.8	12.7	 16
641	  4	79.8	22.5	 16
642	  4	72.0	13.1	 16
643	  4	78.0	17.3	 16
644	  4	141.5	14.7	 16
645	  4	125.8	20.7	 12
646	  4	145.0	39.9	 20
647	  4	60.3	12.3	 16
648	  4	95.8	13.3	 16
649	  4	78.8	18.9	 16
650	  4	60.8	13.8	 16
651	  4	86.8	15.9	 16
652	  4	67.5	8.8	 16
653	  4	69.0	11.3	 16
654	  4	63.8	12.2	 16
655	  4	73.0	8.8	 16
656	  4	68.5	11.8	 16
657	  4	70.3	16.1	 16
658	  4	64.0	13.1	 16
659	  4	65.8	13.8	 16
660	  4	72.0	10.0	 16
661	  4	165.5	20.6	 16
662	  4	144.0	16.6	 16
663	  4	250.8	21.0	 16
664	  4	104.0	66.1	 16
665	  4	84.0	18.3	 16
666	  4	251.0	29.2	 16
667	  4	74.8	22.1	 16
668	  4	84.5	15.7	 16
669	  4	73.3	13.4	 16
670	  4	94.5	17.7	 16
671	  4	110.5	18.2	 16
672	  4	121.5	14.3	 16
673	  4	333.5	47.8	 16
674	  4	257.3	33.2	 16
675	  4	270.3	27.7	 16
676	  4	80.3	9.1	 16
677	  4	135.0	20.7	 16
678	  4	59.5	8.2	 16
679	  4	79.0	14.2	 16
680	  4	251.0	29.6	 16
681	  4	57.0	8.1	 16
682	  4	73.3	13.5	 16
683	  4	78.5	12.6	 16
684	  4	57.3	8.5	 16
685	  4	116.5	26.5	 16
686	  4	155.0	30.7	 16
687	  4	81.3	12.0	 16
688	  4	75.8	34.2	 16
689	  4	69.3	12.6	 16
690	  4	558.5	107.5	 16
691	  4	104.0	17.4	 16
692	  4	381.8	43.2	 16
693	  4	123.3	24.5	 16
694	  4	139.3	32.6	 16
695	  4	162.8	23.3	 16
696	  4	156.5	31.0	 16
697	  4	64.5	10.9	 16
698	  4	69.3	10.6	 16
699	  4	99.8	28.8	 16
700	  4	129.8	20.8	 16
701	  4	120.5	17.1	 16
702	  4	161.3	34.5	 16
703	  4	225.3	23.7	 16
704	  4	293.0	43.8	 16
705	  4	345.0	36.1	 16
706	  4	102.8	16.1	 16
707	  4	58.8	15.6	 16
708	  4	61.8	10.6	 16
709	  4	50.3	9.6	 16
710	  4	52.3	9.1	 16
711	  4	48.3	9.8	 16
  0	  5	123.8	24.0	 16
  1	  5	71.5	10.8	 16
  2	  5	83.0	15.6	 16
  3	  5	121.5	36.4	 16
  4	  5	64.5	10.3	 16
  5	  5	125.3	22.2	 16
  6	  5	560.8	74.6	 16
  7	  5	141.0	14.7	 16
  8	  5	98.5	25.3	 16
  9	  5	178.5	25.4	 16
 10	  5	171.5	26.5	 16
 11	  5	92.5	19.1	 16
 12	  5	126.3	16.8	 16
 13	  5	8082.0	994.5	 16
 14	  5	8718.8	1358.9	 16
 15	  5	8277.3	1069.0	 16
 16	  5	120.0	16.0	 16
 17	  5	69.8	15.0	 16
 18	  5	127.3	19.6	 16
 19	  5	115.5	12.2	 16
 20	  5	110.3	15.3	 16
 21	  5	114.3	15.4	 16
 22	  5	121.8	14.0	 16
 23	  5	73.3	11.1	 16
 24	  5	129.3	19.3	 16
 25	  5	138.0	15.6	 16
 26	  5	122.5	15.8	 16
 27	  5	120.5	21.5	 16
 28	  5	126.0	22.3	 16
 29	  5	80.0	12.8	 16
 30	  5	129.8	22.9	 16
 31	  5	134.3	23.4	 16
 32	  5	112.8	12.3	 16
 33	  5	113.3	17.9	 16
 34	  5	113.3	20.2	 16
 35	  5	83.5	11.6	 16
 36	  5	127.8	18.0	 16
 37	  5	7300.8	1088.0	 16
 38	  5	8097.8	1119.5	 16
 39	  5	8171.8	1125.4	 16
 40	  5	143.3	17.2	 16
 41	  5	91.5	16.9	 16
 42	  5	7838.3	629.1	 16
 43	  5	138.8	24.7	 16
 44	  5	133.0	19.5	 16
 45	  5	130.3	21.2	 16
 46	  5	147.5	27.1	 16
 47	  5	68.0	11.6	 16
 48	  5	119.5	19.6	 16
 49	  5	123.3	18.6	 16
 50	  5	127.0	12.9	 16
 51	  5	102.8	14.5	 16
 52	  5	101.8	12.9	 16
 53	  5	75.0	12.6	 16
 54	  5	109.0	18.3	 16
 55	  5	118.5	18.1	 16
 56	  5	104.3	14.8	 16
 57	  5	117.0	15.2	 16
 58	  5	124.0	13.0	 16
 59	  5	90.3	42.2	 16
 60	  5	72.3	13.6	 16
 61	  5	85.3	16.6	 16
 62	  5	6699.3	1056.2	 16
 63	  5	143.5	25.2	 16
 64	  5	113.0	19.4	 16
 65	  5	114.0	14.7	 16
 66	  5	6200.0	1237.1	 16
 67	  5	99.3	17.2	 16
 68	  5	137.0	17.0	 16
 69	  5	6250.8	1203.9	 16
 70	  5	6563.5	1152.2	 16
 71	  5	5872.8	973.9	 16
 72	  5	125.0	13.7	 16
 73	  5	71.3	12.5	 16
 74	  5	122.0	18.0	 16
 75	  5	107.0	17.7	 16
 76	  5	97.0	12.4	 16
 77	  5	135.3	48.3	 20
 78	  5	120.8	14.8	 16
 79	  5	77.5	15.6	 16
 80	  5	7013.0	1168.6	 16
 81	  5	116.0	10.2	 16
 82	  5	116.5	17.9	 16
 83	  5	108.3	13.9	 16
 84	  5	6967.0	871.9	 16
 85	  5	99.5	18.7	 16
 86	  5	111.3	15.0	 16
 87	  5	128.5	11.6	 16
 88	  5	6424.3	769.0	 16
 89	  5	124.3	17.9	 16
 90	  5	134.3	35.9	 16
 91	  5	104.0	21.2	 16
 92	  5	116.3	22.7	 16
 93	  5	5287.5	515.4	 16
 94	  5	5317.8	649.6	 16
 95	  5	134.3	24.1	 16
 96	  5	116.3	19.9	 16
 97	  5	74.3	13.3	 16
 98	  5	113.5	13.5	 16
 99	  5	6238.5	511.9	 16
100	  5	6394.5	793.9	 16
101	  5	113.3	13.8	 16
102	  5	96.3	11.9	 16
103	  5	66.5	11.6	 16
104	  5	107.3	19.9	 16
105	  5	145.5	19.7	 16
106	  5	5081.0	679.0	 16
107	  5	120.0	17.1	 16
108	  5	115.3	27.1	 16
109	  5	64.3	11.4	 16
110	  5	61.3	11.7	 16
111	  5	87.3	16.8	 16
112	  5	136.5	19.4	 16
113	  5	85.5	13.7	 16
114	  5	66.3	12.0	 16
115	  5	158.3	16.3	 16
116	  5	96.0	16.0	 16
117	  5	108.0	17.6	 16
118	  5	2297.3	243.0	 16
119	  5	187.0	25.7	 16
120	  5	83.0	16.9	 16
121	  5	93.5	15.5	 16
122	  5	67.0	13.7	 16
123	  5	75.3	16.4	 16
124	  5	59.3	11.4	 16
125	  5	83.3	19.9	 16
126	  5	183.5	30.9	 16
127	  5	65.3	17.8	 16
128	  5	268.0	29.1	 16
129	  5	162.0	14.4	 16
130	  5	114.3	20.0	 16
131	  5	228.0	32.9	 16
132	  5	73.0	16.4	 16
133	  5	225.8	30.2	 16
134	  5	166.0	23.2	 16
135	  5	105.0	13.1	 16
136	  5	83.5	22.5	 16
137	  5	67.3	12.7	 16
138	  5	60.5	55.3	 16
139	  5	266.3	40.4	 16
140	  5	59.5	9.9	 16
141	  5	162.0	23.8	 16
142	  5	63.5	19.6	 16
143	  5	278.8	51.2	 16
144	  5	119.8	26.7	 16
145	  5	82.8	16.6	 16
146	  5	111.8	12.9	 16
147	  5	408.3	52.4	 16
148	  5	84.0	14.8	 16
149	  5	81.0	13.2	 16
150	  5	154.0	30.2	 16
151	  5	109.3	20.5	 16
152	  5	188.8	23.2	 16
153	  5	109.5	16.7	 16
154	  5	177.3	35.0	 16
155	  5	74.3	8.9	 16
156	  5	109.0	13.9	 16
157	  5	196.5	31.6	 16
158	  5	133.0	17.0	 16
159	  5	205.5	25.0	 16
160	  5	152.0	21.9	 16
161	  5	133.8	31.4	 16
162	  5	117.0	16.9	 16
163	  5	117.0	24.8	 16
164	  5	125.0	23.2	 16
165	  5	232.5	31.3	 16
166	  5	204.8	23.4	 16
167	  5	98.3	15.8	 16
168	  5	68.5	10.0	 16
169	  5	172.5	28.0	 16
170	  5	98.0	28.5	 16
171	  5	107.3	15.7	 16
172	  5	139.8	18.9	 16
173	  5	68.5	13.8	 16
174	  5	190.3	37.2	 16
175	  5	98.8	15.9	 16
176	  5	72.5	36.0	 16
177	  5	74.5	20.2	 16
178	  5	52.5	8.3	 16
179	  5	79.0	14.4	 16
180	  5	288.8	54.0	 16
181	  5	354.5	52.7	 16
182	  5	155.5	19.3	 16
183	  5	87.3	20.0	 16
184	  5	59.3	14.4	 16
185	  5	189.5	27.6	 16
186	  5	145.5	28.5	 16
187	  5	63.8	13.1	 16
188	  5	111.3	14.4	 16
189	  5	81.0	11.7	 16
190	  5	79.0	15.2	 16
191	  5	72.5	13.5	 16
192	  5	136.8	28.8	 16
193	  5	111.5	26.5	 16
194	  5	158.8	29.1	 16
195	  5	152.5	26.7	 16
196	  5	137.3	27.5	 16
197	  5	156.3	27.4	 16
198	  5	134.8	14.0	 16
199	  5	86.0	14.3	 16
200	  5	157.0	25.2	 16
201	  5	83.3	14.3	 16
202	  5	86.0	18.8	 16
203	  5	78.0	13.9	 16
204	  5	71.5	12.6	 16
205	  5	63.5	9.5	 16
206	  5	460.3	78.7	 16
207	  5	55.5	7.2	 16
208	  5	76.5	13.8	 16
209	  5	160.5	22.3	 16
210	  5	137.3	25.6	 16
211	  5	88.0	15.6	 16
212	  5	103.3	19.1	 16
213	  5	144.3	26.8	 16
214	  5	227.8	29.5	 16
215	  5	82.5	14.4	 16
216	  5	101.3	15.3	 16
217	  5	364.0	58.0	 16
218	  5	72.0	12.0	 16
219	  5	73.5	13.5	 16
220	  5	65.3	11.6	 20
221	  5	143.0	26.7	 16
222	  5	73.3	11.7	 16
223	  5	76.0	17.2	 16
224	  5	83.5	15.2	 16
225	  5	67.5	11.2	 16
226	  5	91.3	18.1	 16
227	  5	101.3	18.6	 16
228	  5	117.0	17.1	 16
229	  5	382.0	47.8	 16
230	  5	83.3	13.7	 16
231	  5	105.5	18.7	 16
232	  5	64.5	12.4	 16
233	  5	75.0	16.2	 16
234	  5	58.8	9.3	 16
235	  5	171.3	29.5	 16
236	  5	78.3	15.3	 16
237	  5	62.0	8.2	 16
238	  5	117.8	19.7	 16
239	  5	235.8	41.2	 16
240	  5	82.0	16.5	 16
241	  5	54.5	10.0	 16
242	  5	83.3	12.1	 16
243	  5	148.3	22.3	 16
244	  5	112.8	11.1	 16
245	  5	372.3	44.2	 16
246	  5	189.0	22.5	 16
247	  5	66.3	12.1	 16
248	  5	84.3	19.1	 16
249	  5	113.0	16.4	 16
250	  5	80.0	18.0	 16
251	  5	1892.5	278.6	 16
252	  5	67.3	11.5	 16
253	  5	59.5	11.9	 16
254	  5	62.5	10.4	 16
255	  5	159.3	28.7	 16
256	  5	385.3	59.9	 16
257	  5	83.3	15.3	 16
258	  5	79.8	17.3	 16
259	  5	69.0	11.5	 16
260	  5	76.0	17.8	 16
261	  5	69.3	13.3	 16
262	  5	155.0	25.6	 16
263	  5	61.5	13.0	 16
264	  5	66.3	10.6	 16
265	  5	62.5	9.7	 16
266	  5	61.8	10.9	 16
267	  5	59.3	15.8	 16
268	  5	78.3	15.1	 16
269	  5	74.3	12.3	 16
270	  5	90.0	9.1	 16
271	  5	258.8	40.9	 16
272	  5	132.8	19.4	 16
273	  5	102.5	15.8	 16
274	  5	71.3	18.3	 16
275	  5	74.3	15.6	 16
276	  5	63.5	12.2	 16
277	  5	73.0	12.5	 16
278	  5	100.3	20.7	 16
279	  5	68.5	14.0	 16
280	  5	106.0	11.3	 16
281	  5	540.0	72.0	 16
282	  5	541.3	88.3	 16
283	  5	154.0	23.3	 16
284	  5	93.8	20.5	 16
285	  5	207.8	27.3	 16
286	  5	75.8	16.1	 16
287	  5	86.3	15.8	 16
288	  5	184.5	37.5	 16
289	  5	146.3	20.1	 16
290	  5	1208.5	158.8	 16
291	  5	110.8	17.3	 16
292	  5	129.3	22.0	 16
293	  5	133.5	27.9	 16
294	  5	285.8	37.8	 16
295	  5	144.5	22.3	 16
296	  5	111.3	29.1	 16
297	  5	86.8	13.4	 16
298	  5	74.3	11.9	 16
299	  5	65.5	12.7	 16
300	  5	1039.5	160.8	 16
301	  5	135.3	23.9	 16
302	  5	275.0	46.4	 16
303	  5	347.8	51.3	 16
304	  5	63.8	10.7	 16
305	  5	76.5	11.2	 16
306	  5	296.0	37.6	 16
307	  5	77.3	12.8	 16
308	  5	242.0	26.1	 16
309	  5	178.8	23.2	 16
310	  5	82.5	16.7	 16
311	  5	200.8	31.2	 16
312	  5	113.8	16.2	 16
313	  5	124.3	19.0	 16
314	  5	142.8	26.2	 16
315	  5	95.5	13.1	 16
316	  5	96.8	27.4	 16
317	  5	99.3	38.4	 16
318	  5	148.3	26.8	 16
319	  5	77.5	14.6	 16
320	  5	59.5	12.6	 16
321	  5	73.8	13.8	 16
322	  5	68.0	15.9	 16
323	  5	94.3	17.0	 16
324	  5	173.0	29.5	 16
325	  5	151.3	19.3	 16
326	  5	201.5	30.3	 16
327	  5	211.0	29.2	 16
328	  5	68.0	11.8	 16
329	  5	349.0	47.3	 16
330	  5	597.5	87.6	 16
331	  5	110.5	17.6	 16
332	  5	79.0	12.2	 16
333	  5	294.0	55.6	 16
334	  5	109.3	14.9	 16
335	  5	76.0	13.0	 16
336	  5	68.5	12.7	 16
337	  5	120.3	35.5	 16
338	  5	91.0	17.5	 16
339	  5	77.5	14.2	 16
340	  5	194.0	121.5	 16
341	  5	269.0	29.0	 16
342	  5	64.3	11.5	 16
343	  5	68.5	12.8	 16
344	  5	87.0	15.0	 16
345	  5	99.8	16.9	 16
346	  5	105.3	19.0	 16
347	  5	963.3	92.4	 16
348	  5	84.0	15.0	 16
349	  5	144.5	69.8	 16
350	  5	159.3	27.2	 16
351	  5	319.8	39.7	 16
352	  5	339.3	35.0	 16
353	  5	102.8	17.5	 16
354	  5	82.3	14.1	 16
355	  5	1824.3	314.5	 16
356	  5	83.5	14.4	 16
357	  5	106.0	21.1	 16
358	  5	70.8	8.9	 16
359	  5	97.0	17.7	 16
360	  5	107.0	22.5	 16
361	  5	143.3	15.9	 16
362	  5	219.3	42.0	 20
363	  5	64.0	12.4	 16
364	  5	58.8	14.8	 16
365	  5	67.0	11.5	 16
366	  5	62.5	13.7	 16
367	  5	800.5	133.2	 16
368	  5	133.8	23.7	 16
369	  5	122.8	15.1	 16
370	  5	79.5	10.5	 16
371	  5	222.5	23.7	 16
372	  5	188.0	35.9	 16
373	  5	116.0	18.9	 16
374	  5	74.0	15.1	 16
375	  5	62.3	13.3	 16
376	  5	89.3	52.7	 16
377	  5	80.3	14.9	 16
378	  5	126.0	18.6	 16
379	  5	106.5	18.5	 16
380	  5	166.0	35.5	 16
381	  5	93.3	16.7	 16
382	  5	166.0	16.3	 16
383	  5	292.3	40.1	 16
384	  5	65.3	12.5	 16
385	  5	118.0	17.6	 16
386	  5	125.0	23.1	 16
387	  5	200.0	27.0	 16
388	  5	143.0	25.8	 16
389	  5	475.8	48.5	 16
390	  5	88.0	19.4	 16
391	  5	70.5	15.0	 16
392	  5	290.0	28.9	 16
393	  5	83.0	11.5	 16
394	  5	104.3	15.6	 16
395	  5	69.0	20.2	 16
396	  5	63.0	8.4	 16
397	  5	176.3	43.8	 16
398	  5	221.5	35.0	 16
399	  5	145.5	21.6	 16
400	  5	272.8	34.4	 16
401	  5	90.3	9.8	 16
402	  5	83.0	19.0	 16
403	  5	59.0	12.1	 16
404	  5	103.3	11.8	 16
405	  5	69.5	9.2	 16
406	  5	106.0	15.0	 16
407	  5	124.5	26.3	 16
408	  5	159.3	19.0	 16
409	  5	85.3	15.5	 16
410	  5	126.0	21.2	 16
411	  5	137.8	24.9	 16
412	  5	80.3	15.7	 16
413	  5	103.3	17.0	 16
414	  5	105.0	15.8	 16
415	  5	3186.8	447.9	 16
416	  5	3198.5	440.9	 16
417	  5	310.5	52.0	 16
418	  5	104.8	19.0	 16
419	  5	211.5	36.3	 16
420	  5	64.3	11.0	 16
421	  5	93.0	11.6	 16
422	  5	70.5	10.2	 16
423	  5	88.3	16.6	 16
424	  5	87.3	17.5	 16
425	  5	114.8	18.0	 16
426	  5	75.3	14.7	 16
427	  5	80.3	19.5	 16
428	  5	86.3	11.4	 16
429	  5	110.0	12.9	 16
430	  5	86.3	15.4	 16
431	  5	99.0	14.6	 16
432	  5	140.5	24.7	 16
433	  5	106.3	17.7	 16
434	  5	103.3	13.0	 16
435	  5	65.0	11.9	 16
436	  5	74.0	14.2	 16
437	  5	105.5	37.9	 16
438	  5	71.3	16.4	 16
439	  5	168.5	24.1	 16
440	  5	108.0	16.9	 16
441	  5	113.5	15.6	 16
442	  5	154.0	14.7	 16
443	  5	116.0	24.5	 16
444	  5	109.3	17.6	 16
445	  5	109.3	20.6	 16
446	  5	114.3	11.3	 16
447	  5	67.5	11.5	 16
448	  5	162.5	20.8	 16
449	  5	585.0	101.2	 16
450	  5	310.3	30.0	 16
451	  5	436.8	72.9	 16
452	  5	203.5	28.6	 16
453	  5	178.5	25.6	 16
454	  5	333.0	66.2	 16
455	  5	106.8	22.1	 16
456	  5	67.3	10.6	 16
457	  5	79.5	17.3	 16
458	  5	146.3	24.5	 16
459	  5	91.5	19.3	 16
460	  5	72.0	13.4	 16
461	  5	115.8	16.9	 16
462	  5	83.0	10.3	 16
463	  5	122.5	15.3	 16
464	  5	913.0	95.7	 16
465	  5	263.3	37.9	 16
466	  5	96.8	20.9	 16
467	  5	111.0	38.6	 16
468	  5	96.0	13.8	 16
469	  5	170.0	20.8	 16
470	  5	113.5	14.1	 16
471	  5	83.8	11.7	 16
472	  5	164.8	23.6	 16
473	  5	110.3	13.6	 16
474	  5	65.5	13.8	 16
475	  5	78.5	12.7	 16
476	  5	134.5	32.1	 16
477	  5	91.3	15.0	 16
478	  5	133.3	13.8	 16
479	  5	96.0	19.6	 16
480	  5	83.3	20.1	 16
481	  5	86.3	18.0	 16
482	  5	121.3	21.3	 16
483	  5	74.3	10.5	 16
484	  5	90.8	18.8	 16
485	  5	186.0	25.2	 16
486	  5	86.3	15.9	 16
487	  5	134.0	21.4	 16
488	  5	104.3	14.4	 16
489	  5	95.0	11.5	 16
490	  5	78.3	14.0	 16
491	  5	223.3	23.7	 16
492	  5	67.5	8.8	 16
493	  5	89.3	28.8	 16
494	  5	84.0	10.2	 16
495	  5	120.3	14.4	 16
496	  5	228.3	38.7	 16
497	  5	98.3	16.3	 16
498	  5	113.5	19.4	 16
499	  5	91.3	15.3	 16
500	  5	112.5	13.9	 16
501	  5	82.5	16.1	 16
502	  5	57.0	9.3	 16
503	  5	377.3	76.8	 16
504	  5	87.3	21.0	 20
505	  5	120.5	22.0	 16
506	  5	61.3	9.2	 16
507	  5	69.5	8.2	 16
508	  5	138.8	24.4	 16
509	  5	863.0	176.0	 16
510	  5	72.3	10.8	 16
511	  5	288.3	43.8	 16
512	  5	84.0	14.7	 16
513	  5	70.5	10.8	 16
514	  5	68.0	13.1	 16
515	  5	72.3	9.5	 16
516	  5	75.8	13.8	 16
517	  5	273.5	31.5	 16
518	  5	139.5	23.5	 16
519	  5	86.5	17.2	 16
520	  5	84.8	12.6	 16
521	  5	174.8	17.4	 16
522	  5	172.0	20.4	 16
523	  5	141.3	25.8	 16
524	  5	415.8	45.5	 16
525	  5	63.3	8.7	 16
526	  5	112.0	14.4	 16
527	  5	233.3	29.7	 16
528	  5	75.3	15.0	 16
529	  5	300.3	63.0	 16
530	  5	112.0	17.7	 16
531	  5	122.3	15.0	 16
532	  5	90.0	15.0	 16
533	  5	148.3	42.1	 16
534	  5	136.5	21.7	 16
535	  5	195.5	25.0	 16
536	  5	542.5	62.6	 16
537	  5	93.5	17.0	 16
538	  5	3376.0	355.6	 16
539	  5	596.3	87.4	 16
540	  5	64.8	11.8	 16
541	  5	149.3	18.1	 16
542	  5	116.0	24.9	 16
543	  5	62.8	12.3	 16
544	  5	136.8	18.0	 16
545	  5	227.5	23.8	 16
546	  5	254.5	50.2	 16
547	  5	271.5	32.0	 16
548	  5	134.5	15.3	 16
549	  5	109.5	18.1	 16
550	  5	97.0	11.2	 16
551	  5	154.3	25.6	 16
552	  5	65.8	13.3	 16
553	  5	86.3	14.8	 16
554	  5	57.5	11.9	 16
555	  5	93.3	19.2	 16
556	  5	87.3	15.3	 12
557	  5	119.8	17.2	 16
558	  5	77.8	13.6	 16
559	  5	77.3	15.2	 16
560	  5	194.5	26.9	 16
561	  5	215.3	28.3	 16
562	  5	4911.3	834.3	 16
563	  5	84.5	12.9	 16
564	  5	79.0	13.6	 16
565	  5	154.3	22.6	 16
566	  5	358.5	59.1	 16
567	  5	309.8	49.9	 16
568	  5	98.3	16.0	 16
569	  5	270.0	40.0	 16
570	  5	674.5	82.3	 16
571	  5	100.5	13.1	 16
572	  5	135.8	21.0	 16
573	  5	75.0	13.0	 16
574	  5	103.5	14.8	 16
575	  5	112.3	19.2	 16
576	  5	156.3	33.9	 16
577	  5	79.3	12.5	 16
578	  5	105.8	17.3	 16
579	  5	1023.8	228.9	 16
580	  5	107.5	19.1	 16
581	  5	267.3	28.9	 16
582	  5	327.0	55.8	 16
583	  5	219.8	22.8	 16
584	  5	135.0	39.7	 16
585	  5	176.0	28.1	 16
586	  5	139.5	18.0	 16
587	  5	118.0	18.5	 16
588	  5	99.0	15.8	 16
589	  5	91.8	41.8	 16
590	  5	62.5	9.5	 16
591	  5	75.5	10.2	 16
592	  5	259.5	35.7	 16
593	  5	209.0	26.8	 16
594	  5	131.8	19.7	 16
595	  5	88.0	21.3	 16
596	  5	112.8	23.0	 16
597	  5	211.0	47.2	 16
598	  5	195.3	33.8	 16
599	  5	64.0	12.0	 16
600	  5	96.8	14.5	 16
601	  5	123.3	16.5	 16
602	  5	494.8	71.3	 16
603	  5	88.3	18.6	 16
604	  5	68.5	9.4	 16
605	  5	69.8	12.3	 16
606	  5	59.8	9.1	 16
607	  5	75.8	30.1	 16
608	  5	69.5	14.2	 16
609	  5	153.5	17.9	 16
610	  5	56.0	7.6	 16
611	  5	52.8	9.5	 16
612	  5	105.0	23.3	 16
613	  5	90.3	13.5	 16
614	  5	146.3	20.2	 16
615	  5	93.3	11.1	 16
616	  5	169.8	19.9	 16
617	  5	189.0	18.8	 16
618	  5	105.0	17.7	 16
619	  5	74.0	15.2	 16
620	  5	67.5	9.4	 16
621	  5	64.5	9.7	 16
622	  5	67.3	15.1	 16
623	  5	147.3	26.8	 16
624	  5	225.3	31.9	 16
625	  5	100.8	13.8	 16
626	  5	361.3	37.3	 16
627	  5	71.3	14.4	 16
628	  5	80.3	14.0	 16
629	  5	210.0	33.3	 16
630	  5	77.0	15.1	 16
631	  5	68.0	10.1	 16
632	  5	155.0	27.2	 16
633	  5	125.8	19.4	 16
634	  5	136.5	24.3	 16
635	  5	98.0	24.8	 16
636	  5	91.3	12.8	 16
637	  5	464.8	97.2	 16
638	  5	271.8	40.1	 16
639	  5	74.8	12.8	 16
640	  5	119.3	16.6	 16
641	  5	72.3	12.0	 16
642	  5	56.3	8.5	 16
643	  5	101.0	16.6	 16
644	  5	121.3	24.8	 16
645	  5	127.0	26.0	 16
646	  5	79.0	11.6	 16
647	  5	63.8	9.7	 20
648	  5	469.3	54.9	 16
649	  5	72.0	10.4	 16
650	  5	87.0	33.9	 16
651	  5	300.5	25.3	 16
652	  5	131.0	21.1	 16
653	  5	68.3	12.4	 16
654	  5	124.5	23.1	 16
655	  5	172.3	25.8	 16
656	  5	149.8	20.5	 16
657	  5	1125.5	99.8	 16
658	  5	60.8	10.3	 16
659	  5	273.5	45.1	 16
660	  5	164.5	25.4	 16
661	  5	242.5	32.5	 16
662	  5	120.3	23.6	 16
663	  5	122.0	21.3	 16
664	  5	1426.8	156.9	 16
665	  5	148.3	18.4	 16
666	  5	244.0	35.2	 16
667	  5	124.5	20.5	 16
668	  5	275.8	35.8	 16
669	  5	259.0	39.1	 16
670	  5	94.0	12.7	 16
671	  5	88.3	15.6	 16
672	  5	156.3	23.6	 16
673	  5	87.8	13.1	 16
674	  5	204.3	107.6	 16
675	  5	136.8	48.5	 16
676	  5	79.5	15.5	 16
677	  5	74.0	11.3	 16
678	  5	123.5	19.8	 16
679	  5	2702.0	500.3	 16
680	  5	63.5	11.0	 16
681	  5	311.5	51.4	 16
682	  5	118.0	45.2	 16
683	  5	124.3	24.0	 16
684	  5	81.3	12.3	 16
685	  5	65.5	10.9	 16
686	  5	66.5	12.8	 16
687	  5	72.3	11.3	 16
688	  5	3999.8	792.9	 16
689	  5	355.3	34.7	 16
690	  5	110.8	16.4	 16
691	  5	347.5	41.7	 16
692	  5	175.0	28.9	 16
693	  5	231.3	32.1	 16
694	  5	287.8	29.3	 16
695	  5	153.5	18.6	 16
696	  5	108.0	23.0	 16
697	  5	101.0	14.3	 16
698	  5	71.5	12.2	 16
699	  5	267.5	28.7	 16
700	  5	73.0	9.6	 16
701	  5	123.5	19.9	 16
702	  5	175.3	27.4	 16
703	  5	253.8	29.3	 16
704	  5	84.5	15.1	 16
705	  5	179.0	22.4	 16
706	  5	169.8	15.9	 16
707	  5	150.5	21.5	 16
708	  5	99.5	32.2	 16
709	  5	104.5	14.0	 16
710	  5	153.0	24.5	 16
711	  5	113.5	14.7	 16
  0	  6	8470.3	903.3	 16
  1	  6	99.5	15.6	 16
  2	  6	75.8	14.6	 16
  3	  6	102.0	18.1	 16
  4	  6	67.3	8.1	 16
  5	  6	105.0	15.5	 16
  6	  6	188.5	18.4	 16
  7	  6	114.3	26.6	 16
  8	  6	87.0	18.4	 16
  9	  6	313.0	41.4	 16
 10	  6	176.3	23.4	 16
 11	  6	81.0	11.9	 16
 12	  6	8088.0	1139.3	 16
 13	  6	139.0	29.2	 16
 14	  6	134.0	20.4	 16
 15	  6	143.3	24.6	 16
 16	  6	8032.5	1102.5	 16
 17	  6	81.3	9.4	 16
 18	  6	124.5	22.8	 16
 19	  6	146.0	15.6	 16
 20	  6	145.3	23.2	 16
 21	  6	122.0	14.9	 16
 22	  6	134.3	22.8	 16
 23	  6	77.0	10.1	 16
 24	  6	161.5	70.5	 16
 25	  6	138.3	15.2	 16
 26	  6	131.3	18.2	 16
 27	  6	138.5	16.2	 16
 28	  6	132.5	15.0	 16
 29	  6	77.8	10.9	 16
 30	  6	123.3	17.5	 16
 31	  6	132.5	12.1	 16
 32	  6	132.8	29.3	 16
 33	  6	118.0	15.5	 16
 34	  6	133.0	15.5	 16
 35	  6	88.3	10.1	 16
 36	  6	8089.0	892.2	 16
 37	  6	156.5	41.0	 16
 38	  6	127.5	18.4	 16
 39	  6	141.5	222.8	 16
 40	  6	8401.0	1124.5	 16
 41	  6	96.5	17.7	 16
 42	  6	8739.3	595.2	 16
 43	  6	144.5	13.0	 16
 44	  6	132.5	18.4	 16
 45	  6	115.8	15.5	 16
 46	  6	123.0	23.1	 16
 47	  6	71.3	11.1	 16
 48	  6	120.5	12.9	 16
 49	  6	130.5	19.0	 16
 50	  6	128.0	21.5	 16
 51	  6	124.5	20.0	 16
 52	  6	110.0	18.7	 16
 53	  6	74.3	12.6	 16
 54	  6	113.5	14.7	 16
 55	  6	123.5	18.2	 16
 56	  6	112.8	17.3	 16
 57	  6	120.5	11.6	 16
 58	  6	129.8	22.9	 16
 59	  6	71.8	11.5	 16
 60	  6	76.3	16.0	 16
 61	  6	77.8	11.1	 16
 62	  6	8011.0	657.6	 16
 63	  6	152.3	26.8	 16
 64	  6	109.5	15.3	 16
 65	  6	127.0	12.7	 16
 66	  6	7807.8	927.3	 16
 67	  6	97.3	14.7	 16
 68	  6	7944.5	817.0	 16
 69	  6	144.8	20.7	 16
 70	  6	119.0	15.1	 16
 71	  6	129.0	22.8	 16
 72	  6	6497.8	1196.6	 16
 73	  6	93.3	15.7	 16
 74	  6	142.8	26.7	 16
 75	  6	138.0	22.8	 16
 76	  6	110.0	16.0	 16
 77	  6	118.0	17.7	 16
 78	  6	119.0	16.2	 20
 79	  6	81.8	12.1	 16
 80	  6	8055.8	1330.3	 16
 81	  6	122.8	20.3	 16
 82	  6	109.8	16.1	 16
 83	  6	128.0	22.9	 16
 84	  6	8025.5	862.0	 16
 85	  6	94.0	16.7	 16
 86	  6	112.0	15.8	 16
 87	  6	7213.8	776.0	 16
 88	  6	7723.5	998.4	 16
 89	  6	126.5	15.3	 16
 90	  6	122.5	24.7	 16
 91	  6	80.3	12.0	 16
 92	  6	6196.0	844.5	 16
 93	  6	121.8	15.0	 16
 94	  6	125.8	20.1	 16
 95	  6	6272.8	916.9	 16
 96	  6	121.8	17.1	 16
 97	  6	77.5	14.2	 16
 98	  6	6788.5	877.0	 16
 99	  6	129.8	22.6	 16
100	  6	125.0	18.5	 16
101	  6	6672.3	999.2	 16
102	  6	117.8	23.0	 16
103	  6	72.3	10.5	 16
104	  6	119.3	13.6	 16
105	  6	6032.3	1006.2	 16
106	  6	118.3	20.7	 16
107	  6	6036.3	1076.3	 16
108	  6	128.0	20.0	 16
109	  6	68.3	12.2	 16
110	  6	59.5	11.3	 16
111	  6	78.5	12.8	 16
112	  6	82.3	12.9	 16
113	  6	80.5	14.3	 16
114	  6	76.0	18.2	 16
115	  6	191.5	29.3	 16
116	  6	112.8	15.9	 16
117	  6	102.0	23.7	 16
118	  6	252.3	49.2	 16
119	  6	163.0	22.0	 16
120	  6	96.0	13.9	 16
121	  6	108.0	16.8	 16
122	  6	75.5	12.4	 16
123	  6	83.5	13.6	 16
124	  6	70.0	7.3	 16
125	  6	70.3	12.9	 16
126	  6	80.0	16.9	 16
127	  6	79.8	18.5	 16
128	  6	204.0	22.4	 16
129	  6	126.0	19.5	 16
130	  6	129.5	23.5	 16
131	  6	312.0	31.6	 16
132	  6	67.3	11.7	 16
133	  6	179.3	19.5	 16
134	  6	105.3	13.5	 16
135	  6	88.3	17.9	 16
136	  6	73.3	13.0	 16
137	  6	73.0	14.7	 16
138	  6	59.0	12.6	 16
139	  6	146.5	29.0	 16
140	  6	74.5	14.1	 16
141	  6	82.0	14.0	 16
142	  6	83.3	14.4	 16
143	  6	97.8	13.7	 16
144	  6	85.8	11.3	 16
145	  6	85.0	19.9	 16
146	  6	118.5	21.3	 16
147	  6	176.3	21.4	 16
148	  6	75.0	12.7	 16
149	  6	88.0	36.9	 16
150	  6	110.5	26.2	 16
151	  6	108.8	21.1	 16
152	  6	116.5	16.6	 16
153	  6	115.3	18.3	 16
154	  6	75.0	9.3	 16
155	  6	110.8	12.9	 16
156	  6	116.3	25.6	 16
157	  6	149.3	22.9	 16
158	  6	116.3	23.0	 16
159	  6	171.0	20.7	 16
160	  6	149.3	22.3	 16
161	  6	138.3	19.4	 16
162	  6	118.0	11.8	 16
163	  6	139.8	20.5	 16
164	  6	143.3	19.6	 16
165	  6	77.3	9.6	 16
166	  6	150.3	26.3	 16
167	  6	86.0	13.1	 16
168	  6	77.8	12.6	 16
169	  6	114.0	19.3	 16
170	  6	82.0	15.2	 16
171	  6	127.5	17.4	 16
172	  6	87.8	15.4	 16
173	  6	63.3	12.6	 16
174	  6	115.8	46.6	 16
175	  6	61.0	8.7	 16
176	  6	74.5	15.8	 16
177	  6	54.0	10.4	 16
178	  6	64.3	10.7	 16
179	  6	74.3	17.0	 16
180	  6	149.8	27.7	 16
181	  6	107.0	19.0	 16
182	  6	118.0	27.2	 16
183	  6	101.3	15.4	 16
184	  6	48.3	10.8	 16
185	  6	107.8	19.2	 16
186	  6	102.0	11.9	 16
187	  6	74.5	15.9	 16
188	  6	100.5	13.7	 16
189	  6	87.0	18.1	 16
190	  6	104.5	22.6	 16
191	  6	58.0	9.2	 16
192	  6	88.3	14.9	 16
193	  6	83.0	13.1	 16
194	  6	101.0	13.1	 16
195	  6	89.5	14.7	 16
196	  6	133.3	17.7	 16
197	  6	146.5	19.3	 16
198	  6	219.5	42.6	 16
199	  6	234.5	24.7	 16
200	  6	236.8	33.7	 16
201	  6	134.3	26.5	 16
202	  6	132.5	24.2	 16
203	  6	85.5	56.5	 16
204	  6	67.5	15.0	 16
205	  6	56.3	9.4	 16
206	  6	123.5	58.2	 16
207	  6	59.3	12.4	 16
208	  6	68.5	16.4	 16
209	  6	154.3	21.7	 16
210	  6	90.8	15.3	 16
211	  6	67.3	11.8	 16
212	  6	101.5	12.1	 16
213	  6	84.3	13.7	 16
214	  6	161.3	26.0	 16
215	  6	100.3	15.3	 16
216	  6	114.3	34.9	 16
217	  6	155.0	23.7	 16
218	  6	73.0	9.9	 16
219	  6	62.3	11.9	 16
220	  6	59.3	8.9	 16
221	  6	69.5	16.8	 20
222	  6	67.3	17.7	 16
223	  6	105.8	23.1	 16
224	  6	64.0	12.3	 16
225	  6	71.5	14.8	 16
226	  6	58.3	10.0	 16
227	  6	72.0	6.6	 16
228	  6	233.3	198.7	 16
229	  6	330.3	45.0	 16
230	  6	55.0	8.8	 16
231	  6	80.0	11.4	 16
232	  6	53.8	8.3	 16
233	  6	82.3	19.0	 16
234	  6	69.3	15.6	 16
235	  6	81.5	9.7	 16
236	  6	73.0	15.1	 16
237	  6	57.5	9.2	 16
238	  6	112.3	16.0	 16
239	  6	170.0	44.3	 16
240	  6	62.3	10.0	 16
241	  6	60.3	10.8	 16
242	  6	80.3	12.5	 16
243	  6	98.5	12.3	 16
244	  6	92.3	13.0	 16
245	  6	145.3	17.8	 16
246	  6	85.5	16.3	 16
247	  6	59.5	12.9	 16
248	  6	72.0	11.3	 16
249	  6	84.3	13.9	 16
250	  6	70.8	17.0	 16
251	  6	220.0	42.9	 16
252	  6	71.8	14.1	 16
253	  6	55.5	10.7	 16
254	  6	67.3	14.2	 16
255	  6	104.3	18.3	 16
256	  6	178.8	21.9	 16
257	  6	58.3	10.1	 16
258	  6	107.8	74.9	 16
259	  6	63.5	9.7	 16
260	  6	69.0	35.8	 16
261	  6	62.8	11.8	 16
262	  6	86.8	12.6	 16
263	  6	73.5	13.3	 16
264	  6	57.8	9.8	 16
265	  6	57.5	9.3	 16
266	  6	92.0	55.2	 16
267	  6	82.3	105.3	 16
268	  6	71.3	12.2	 16
269	  6	61.8	10.8	 16
270	  6	72.0	11.4	 16
271	  6	79.8	20.7	 16
272	  6	119.8	25.2	 16
273	  6	107.8	20.0	 16
274	  6	59.8	13.1	 16
275	  6	67.3	13.7	 16
276	  6	64.0	9.6	 16
277	  6	64.5	11.6	 16
278	  6	75.3	10.6	 16
279	  6	59.3	11.4	 16
280	  6	97.8	18.2	 16
281	  6	364.8	18.9	 16
282	  6	331.5	55.3	 16
283	  6	184.8	63.3	 16
284	  6	90.8	64.0	 16
285	  6	148.3	21.8	 16
286	  6	71.0	59.2	 16
287	  6	94.3	18.4	 16
288	  6	243.5	40.9	 16
289	  6	216.0	32.6	 16
290	  6	146.5	20.6	 16
291	  6	79.5	17.9	 16
292	  6	87.3	20.4	 16
293	  6	85.0	13.9	 16
294	  6	109.3	19.1	 16
295	  6	73.8	17.0	 16
296	  6	71.5	10.9	 16
297	  6	90.0	13.2	 16
298	  6	57.3	9.4	 16
299	  6	72.5	14.1	 16
300	  6	308.8	32.9	 16
301	  6	75.0	10.8	 16
302	  6	76.3	18.6	 16
303	  6	149.0	25.5	 16
304	  6	103.0	16.4	 16
305	  6	63.3	14.0	 16
306	  6	253.5	40.7	 16
307	  6	89.3	18.4	 16
308	  6	75.0	16.3	 16
309	  6	104.8	18.2	 16
310	  6	76.8	39.5	 16
311	  6	120.5	18.7	 16
312	  6	70.5	14.3	 16
313	  6	82.3	13.9	 16
314	  6	164.3	25.1	 16
315	  6	81.0	11.3	 16
316	  6	80.8	16.2	 16
317	  6	67.0	12.4	 16
318	  6	61.5	8.6	 16
319	  6	60.3	12.3	 16
320	  6	61.5	11.1	 16
321	  6	55.5	11.8	 16
322	  6	57.0	11.5	 16
323	  6	70.0	11.9	 16
324	  6	139.0	41.5	 16
325	  6	184.5	31.1	 16
326	  6	166.0	25.5	 16
327	  6	109.3	15.6	 16
328	  6	146.8	19.4	 16
329	  6	586.5	93.3	 16
330	  6	194.0	32.2	 16
331	  6	87.3	12.6	 16
332	  6	107.8	18.7	 16
333	  6	202.3	30.8	 16
334	  6	88.8	17.5	 16
335	  6	66.0	11.8	 16
336	  6	76.3	16.0	 16
337	  6	112.5	21.3	 16
338	  6	82.3	10.9	 16
339	  6	89.8	25.5	 16
340	  6	187.5	32.4	 16
341	  6	108.3	25.9	 16
342	  6	58.0	11.4	 16
343	  6	60.0	14.6	 16
344	  6	96.0	23.3	 16
345	  6	78.5	10.4	 16
346	  6	89.3	14.1	 16
347	  6	309.8	49.7	 16
348	  6	68.8	11.3	 16
349	  6	72.3	14.7	 16
350	  6	126.0	14.5	 16
351	  6	345.5	39.4	 16
352	  6	379.3	22.0	 16
353	  6	78.8	15.4	 16
354	  6	56.0	7.0	 16
355	  6	324.8	50.7	 16
356	  6	68.0	12.3	 16
357	  6	68.3	13.0	 16
358	  6	70.0	11.1	 16
359	  6	82.0	15.6	 16
360	  6	79.3	12.0	 16
361	  6	174.3	25.1	 16
362	  6	143.5	23.5	 16
363	  6	66.0	13.3	 20
364	  6	68.0	17.2	 16
365	  6	60.5	10.4	 16
366	  6	53.0	9.3	 16
367	  6	124.5	22.0	 16
368	  6	73.5	14.5	 16
369	  6	61.3	11.5	 16
370	  6	87.8	12.7	 16
371	  6	287.0	19.2	 16
372	  6	101.0	9.9	 16
373	  6	119.5	19.9	 16
374	  6	90.5	54.6	 16
375	  6	62.3	12.1	 16
376	  6	68.3	11.4	 16
377	  6	62.8	10.4	 16
378	  6	93.5	14.1	 16
379	  6	135.5	48.2	 16
380	  6	132.0	28.0	 16
381	  6	115.0	22.9	 16
382	  6	131.5	18.1	 16
383	  6	304.8	44.7	 16
384	  6	52.3	12.1	 16
385	  6	89.3	11.8	 16
386	  6	89.0	16.0	 16
387	  6	95.3	12.0	 16
388	  6	87.5	15.3	 16
389	  6	179.0	26.1	 16
390	  6	79.3	14.1	 16
391	  6	72.3	30.7	 16
392	  6	119.8	12.1	 16
393	  6	67.5	9.4	 16
394	  6	72.0	11.9	 16
395	  6	58.3	10.3	 16
396	  6	76.3	14.6	 16
397	  6	114.5	47.3	 16
398	  6	94.5	13.7	 16
399	  6	84.3	32.8	 16
400	  6	130.3	18.0	 16
401	  6	100.0	19.1	 16
402	  6	58.8	10.3	 16
403	  6	60.0	10.9	 16
404	  6	70.5	11.4	 16
405	  6	74.3	13.8	 16
406	  6	99.0	18.0	 16
407	  6	148.3	15.9	 16
408	  6	125.5	18.1	 16
409	  6	76.3	14.4	 16
410	  6	152.3	20.1	 16
411	  6	139.0	20.3	 16
412	  6	77.5	13.2	 16
413	  6	79.8	15.4	 16
414	  6	83.3	14.0	 16
415	  6	419.5	71.5	 16
416	  6	438.3	89.7	 16
417	  6	102.0	16.8	 16
418	  6	139.5	22.3	 16
419	  6	171.5	20.2	 16
420	  6	61.0	12.4	 16
421	  6	55.3	9.7	 16
422	  6	67.3	18.0	 16
423	  6	61.5	8.4	 16
424	  6	70.8	12.8	 16
425	  6	132.0	28.5	 16
426	  6	80.3	14.6	 16
427	  6	65.0	12.0	 16
428	  6	75.0	8.5	 16
429	  6	118.5	23.9	 16
430	  6	72.3	15.8	 16
431	  6	79.0	10.5	 16
432	  6	183.0	28.8	 16
433	  6	88.5	23.9	 16
434	  6	74.5	15.6	 16
435	  6	67.5	13.2	 16
436	  6	62.3	9.4	 16
437	  6	73.3	15.1	 16
438	  6	87.0	17.9	 16
439	  6	180.8	25.3	 16
440	  6	123.0	18.4	 16
441	  6	117.3	22.3	 16
442	  6	207.3	25.0	 16
443	  6	90.8	15.6	 16
444	  6	96.3	19.0	 16
445	  6	102.3	17.7	 16
446	  6	80.5	9.3	 16
447	  6	77.8	40.7	 16
448	  6	515.5	39.5	 16
449	  6	196.8	26.8	 16
450	  6	150.3	26.9	 16
451	  6	107.8	15.6	 16
452	  6	122.3	17.4	 16
453	  6	104.5	34.0	 16
454	  6	199.0	28.0	 16
455	  6	63.5	10.7	 16
456	  6	59.8	9.2	 16
457	  6	99.0	22.3	 16
458	  6	125.0	16.2	 16
459	  6	103.8	17.0	 16
460	  6	65.0	11.6	 16
461	  6	105.5	19.4	 16
462	  6	62.0	12.0	 16
463	  6	81.3	11.5	 16
464	  6	743.0	69.5	 16
465	  6	211.5	22.8	 16
466	  6	118.0	16.5	 16
467	  6	95.0	15.7	 12
468	  6	92.0	16.4	 16
469	  6	141.5	18.9	 16
470	  6	91.8	16.3	 16
471	  6	112.5	24.7	 16
472	  6	133.8	22.2	 16
473	  6	107.0	18.7	 16
474	  6	57.0	12.8	 16
475	  6	67.3	11.9	 16
476	  6	60.8	8.5	 16
477	  6	76.3	13.4	 16
478	  6	73.8	13.6	 16
479	  6	85.5	48.5	 16
480	  6	64.0	10.9	 16
481	  6	82.3	14.9	 16
482	  6	90.8	15.4	 16
483	  6	77.5	13.0	 16
484	  6	111.5	17.8	 16
485	  6	149.5	26.8	 16
486	  6	102.8	18.5	 16
487	  6	154.3	25.1	 16
488	  6	74.5	13.7	 16
489	  6	72.8	14.7	 16
490	  6	92.5	11.6	 16
491	  6	114.8	18.5	 16
492	  6	72.3	10.3	 16
493	  6	66.3	14.2	 16
494	  6	65.3	12.6	 16
495	  6	125.3	14.0	 16
496	  6	271.0	20.2	 16
497	  6	76.3	12.4	 16
498	  6	95.0	16.1	 16
499	  6	74.8	13.7	 16
500	  6	117.5	13.8	 16
501	  6	117.0	18.2	 16
502	  6	62.5	8.9	 16
503	  6	252.5	36.5	 16
504	  6	67.5	9.2	 16
505	  6	94.0	14.0	 16
506	  6	73.0	8.5	 20
507	  6	75.0	12.9	 16
508	  6	177.3	24.1	 16
509	  6	494.8	56.4	 16
510	  6	96.3	19.7	 16
511	  6	89.5	15.6	 16
512	  6	63.5	12.1	 16
513	  6	64.5	12.2	 16
514	  6	64.0	11.0	 16
515	  6	56.0	10.2	 16
516	  6	67.8	11.8	 16
517	  6	135.3	22.2	 16
518	  6	80.0	13.8	 16
519	  6	78.3	14.3	 16
520	  6	91.0	37.4	 16
521	  6	122.5	12.5	 16
522	  6	83.3	12.5	 16
523	  6	233.3	18.8	 16
524	  6	358.3	50.7	 16
525	  6	57.8	10.2	 16
526	  6	584.3	72.5	 16
527	  6	75.0	14.2	 16
528	  6	65.3	13.6	 16
529	  6	79.0	10.5	 16
530	  6	81.0	15.5	 16
531	  6	115.0	27.1	 16
532	  6	111.3	15.4	 16
533	  6	111.5	12.8	 16
534	  6	91.8	17.2	 16
535	  6	204.3	29.5	 16
536	  6	452.0	32.2	 16
537	  6	105.0	13.3	 16
538	  6	1433.8	144.1	 16
539	  6	199.3	26.2	 16
540	  6	63.3	10.8	 16
541	  6	120.3	18.1	 16
542	  6	90.3	14.5	 16
543	  6	56.3	13.0	 16
544	  6	125.0	18.9	 16
545	  6	191.5	21.7	 16
546	  6	192.3	24.2	 16
547	  6	217.3	17.2	 16
548	  6	177.3	27.0	 16
549	  6	167.8	21.8	 16
550	  6	118.5	17.2	 16
551	  6	118.0	20.2	 16
552	  6	59.3	12.5	 16
553	  6	63.0	11.7	 16
554	  6	66.3	12.8	 16
555	  6	66.3	11.9	 16
556	  6	73.3	15.4	 16
557	  6	63.5	12.0	 16
558	  6	125.8	84.9	 16
559	  6	73.0	13.2	 16
560	  6	196.5	24.4	 16
561	  6	92.0	21.2	 16
562	  6	1035.0	226.9	 16
563	  6	98.3	17.5	 16
564	  6	89.0	10.5	 16
565	  6	110.5	19.1	 16
566	  6	161.3	23.5	 16
567	  6	91.0	17.7	 16
568	  6	59.5	13.0	 16
569	  6	122.0	16.3	 16
570	  6	339.0	64.4	 16
571	  6	90.8	13.7	 16
572	  6	97.8	17.1	 16
573	  6	77.0	9.3	 16
574	  6	105.3	17.8	 16
575	  6	77.3	12.5	 16
576	  6	108.3	17.3	 16
577	  6	87.5	32.9	 16
578	  6	69.5	13.0	 16
579	  6	295.3	48.6	 16
580	  6	125.5	17.5	 16
581	  6	307.5	20.5	 16
582	  6	379.8	50.0	 16
583	  6	211.0	32.0	 16
584	  6	147.8	26.3	 16
585	  6	169.5	22.9	 16
586	  6	116.5	20.8	 16
587	  6	102.3	14.8	 16
588	  6	58.3	8.6	 16
589	  6	61.5	11.0	 16
590	  6	68.5	16.1	 16
591	  6	66.0	8.8	 16
592	  6	251.8	29.5	 16
593	  6	172.5	24.3	 16
594	  6	151.3	25.7	 16
595	  6	85.5	16.7	 16
596	  6	85.3	12.8	 16
597	  6	106.8	20.2	 16
598	  6	80.5	12.5	 16
599	  6	49.3	9.2	 16
600	  6	61.3	15.0	 16
601	  6	87.5	29.2	 16
602	  6	119.5	20.7	 16
603	  6	67.8	11.7	 16
604	  6	68.8	18.6	 16
605	  6	57.8	14.3	 16
606	  6	66.8	12.6	 16
607	  6	86.3	25.9	 16
608	  6	64.0	14.1	 16
609	  6	110.3	17.7	 16
610	  6	56.8	12.1	 16
611	  6	63.8	9.4	 16
612	  6	77.0	20.3	 16
613	  6	73.5	11.9	 16
614	  6	147.5	17.6	 16
615	  6	88.8	17.5	 16
616	  6	80.3	13.5	 16
617	  6	91.3	17.9	 16
618	  6	67.0	11.5	 16
619	  6	71.0	24.8	 16
620	  6	64.3	17.1	 16
621	  6	61.3	9.6	 16
622	  6	67.8	15.0	 16
623	  6	153.3	31.0	 16
624	  6	96.5	12.2	 16
625	  6	80.0	15.4	 16
626	  6	735.0	86.6	 16
627	  6	107.5	16.5	 16
628	  6	59.8	13.9	 16
629	  6	120.3	21.0	 16
630	  6	63.3	10.5	 16
631	  6	66.8	13.4	 16
632	  6	81.0	18.2	 16
633	  6	116.0	18.2	 16
634	  6	119.3	19.1	 16
635	  6	89.0	10.3	 16
636	  6	76.3	16.3	 16
637	  6	233.3	34.5	 16
638	  6	509.8	56.4	 16
639	  6	72.5	13.1	 16
640	  6	93.8	17.6	 16
641	  6	75.5	11.2	 16
642	  6	58.0	12.2	 16
643	  6	83.5	15.2	 16
644	  6	93.0	9.2	 16
645	  6	113.8	18.3	 16
646	  6	78.5	14.0	 16
647	  6	56.3	16.2	 16
648	  6	131.3	24.5	 20
649	  6	67.0	12.5	 16
650	  6	93.3	24.0	 16
651	  6	320.8	34.4	 16
652	  6	123.5	20.7	 16
653	  6	64.5	9.4	 16
654	  6	126.3	24.5	 16
655	  6	172.5	30.7	 16
656	  6	214.8	23.4	 16
657	  6	695.0	80.8	 16
658	  6	74.5	13.3	 16
659	  6	195.5	26.6	 16
660	  6	147.3	18.2	 16
661	  6	125.3	17.4	 16
662	  6	82.5	17.7	 16
663	  6	79.8	16.5	 16
664	  6	613.3	114.5	 16
665	  6	205.3	18.5	 16
666	  6	213.8	32.9	 16
667	  6	102.0	21.4	 16
668	  6	153.0	33.0	 16
669	  6	77.5	15.0	 16
670	  6	65.5	12.8	 16
671	  6	88.3	11.0	 16
672	  6	148.0	16.6	 16
673	  6	90.0	15.3	 16
674	  6	129.0	20.7	 16
675	  6	67.0	12.8	 16
676	  6	88.8	12.2	 16
677	  6	65.0	14.9	 16
678	  6	68.3	10.9	 16
679	  6	293.8	64.4	 16
680	  6	68.0	12.8	 16
681	  6	238.5	40.5	 16
682	  6	114.5	13.7	 16
683	  6	97.0	16.3	 16
684	  6	64.5	9.8	 16
685	  6	70.8	29.7	 16
686	  6	70.5	17.7	 16
687	  6	83.3	15.2	 16
688	  6	925.3	147.5	 16
689	  6	212.0	21.7	 16
690	  6	154.5	24.0	 16
691	  6	177.8	25.0	 16
692	  6	116.3	18.6	 16
693	  6	144.5	19.9	 16
694	  6	97.8	16.4	 16
695	  6	109.8	16.7	 16
696	  6	130.0	17.7	 16
697	  6	123.0	23.9	 16
698	  6	76.3	14.2	 16
699	  6	91.0	18.3	 16
700	  6	70.3	13.2	 16
701	  6	115.5	18.3	 16
702	  6	112.8	19.2	 16
703	  6	160.3	19.4	 16
704	  6	105.5	18.1	 16
705	  6	128.8	23.5	 16
706	  6	189.8	26.0	 16
707	  6	157.8	29.1	 16
708	  6	90.8	19.5	 16
709	  6	88.5	11.5	 16
710	  6	132.3	16.3	 16
711	  6	9174.3	1098.8	 16
  0	  7	121.0	17.7	 16
  1	  7	90.0	11.6	 16
  2	  7	124.5	10.6	 16
  3	  7	189.3	24.9	 16
  4	  7	98.3	16.8	 16
  5	  7	104.5	13.2	 16
  6	  7	65.0	12.3	 16
  7	  7	99.0	17.2	 16
  8	  7	175.0	27.9	 16
  9	  7	318.3	30.4	 16
 10	  7	178.0	24.6	 16
 11	  7	66.8	12.0	 16
 12	  7	8892.0	584.3	 16
 13	  7	134.0	23.2	 16
 14	  7	124.0	15.4	 16
 15	  7	133.3	20.2	 16
 16	  7	125.8	19.9	 16
 17	  7	95.5	13.9	 16
 18	  7	148.5	16.7	 16
 19	  7	7046.3	787.9	 16
 20	  7	7192.3	848.3	 16
 21	  7	7113.3	982.6	 16
 22	  7	146.0	19.4	 16
 23	  7	90.5	16.6	 16
 24	  7	8261.3	788.4	 16
 25	  7	148.3	22.1	 16
 26	  7	7154.5	1140.6	 16
 27	  7	7213.3	1209.9	 16
 28	  7	165.0	48.3	 16
 29	  7	94.0	16.8	 16
 30	  7	134.3	15.0	 16
 31	  7	7153.8	1012.9	 16
 32	  7	7332.3	975.0	 16
 33	  7	7188.0	908.9	 16
 34	  7	152.8	23.9	 16
 35	  7	94.3	11.5	 16
 36	  7	9194.8	591.1	 16
 37	  7	148.0	26.5	 16
 38	  7	117.0	16.1	 16
 39	  7	138.3	35.6	 16
 40	  7	125.8	18.9	 16
 41	  7	79.3	19.8	 16
 42	  7	9290.8	699.0	 16
 43	  7	154.5	22.8	 16
 44	  7	7173.0	688.5	 16
 45	  7	7356.5	586.0	 16
 46	  7	128.0	19.7	 16
 47	  7	82.0	14.5	 16
 48	  7	143.3	30.2	 16
 49	  7	133.0	13.7	 16
 50	  7	5939.5	633.0	 16
 51	  7	133.5	47.1	 16
 52	  7	123.0	16.5	 16
 53	  7	86.3	15.0	 16
 54	  7	8048.3	1016.5	 16
 55	  7	7205.0	765.8	 16
 56	  7	6699.3	783.5	 16
 57	  7	138.0	24.8	 16
 58	  7	124.3	17.5	 16
 59	  7	71.5	13.1	 16
 60	  7	71.8	12.4	 16
 61	  7	73.8	14.9	 16
 62	  7	8766.8	668.7	 16
 63	  7	166.3	44.6	 16
 64	  7	124.3	21.2	 16
 65	  7	136.0	16.2	 16
 66	  7	8933.0	1017.1	 16
 67	  7	118.0	23.6	 16
 68	  7	9007.8	719.5	 16
 69	  7	157.3	24.7	 16
 70	  7	131.0	20.6	 16
 71	  7	125.8	18.9	 16
 72	  7	129.0	18.6	 16
 73	  7	85.5	13.3	 16
 74	  7	124.8	18.1	 16
 75	  7	116.3	13.6	 16
 76	  7	120.3	16.3	 16
 77	  7	117.3	18.1	 16
 78	  7	116.3	22.4	 16
 79	  7	72.8	11.0	 16
 80	  7	8383.0	1498.9	 20
 81	  7	125.5	23.8	 16
 82	  7	129.5	16.6	 16
 83	  7	136.0	19.9	 16
 84	  7	8726.3	1096.6	 16
 85	  7	93.5	16.0	 16
 86	  7	109.3	18.9	 16
 87	  7	130.3	25.7	 16
 88	  7	7575.5	860.5	 16
 89	  7	124.0	47.9	 16
 90	  7	115.0	15.8	 16
 91	  7	78.3	11.5	 16
 92	  7	107.8	13.2	 16
 93	  7	117.3	18.0	 16
 94	  7	122.8	16.8	 16
 95	  7	7043.8	696.8	 16
 96	  7	117.5	18.0	 16
 97	  7	70.5	10.4	 16
 98	  7	113.3	23.0	 16
 99	  7	110.5	19.4	 16
100	  7	120.5	19.4	 16
101	  7	7208.5	755.1	 16
102	  7	128.3	19.0	 16
103	  7	71.5	10.4	 16
104	  7	120.0	25.7	 16
105	  7	7371.0	664.3	 16
106	  7	138.8	17.9	 16
107	  7	7240.3	679.8	 16
108	  7	120.8	22.2	 16
109	  7	66.5	8.9	 16
110	  7	62.5	14.1	 16
111	  7	88.0	15.2	 16
112	  7	99.0	14.5	 16
113	  7	83.0	13.1	 16
114	  7	73.3	9.9	 16
115	  7	84.3	15.9	 16
116	  7	207.5	29.2	 16
117	  7	116.8	18.8	 16
118	  7	80.8	20.1	 16
119	  7	369.3	219.8	 16
120	  7	209.0	34.4	 16
121	  7	325.0	36.5	 16
122	  7	113.8	12.7	 16
123	  7	176.0	26.3	 16
124	  7	118.0	20.7	 16
125	  7	258.5	27.2	 16
126	  7	3617.8	336.7	 16
127	  7	3844.3	257.7	 16
128	  7	3664.0	454.6	 16
129	  7	131.5	20.4	 16
130	  7	92.0	17.2	 16
131	  7	1414.8	166.9	 16
132	  7	82.0	12.0	 16
133	  7	745.8	55.5	 16
134	  7	409.3	41.6	 16
135	  7	285.5	30.4	 16
136	  7	244.5	25.8	 16
137	  7	113.5	28.0	 16
138	  7	85.3	13.8	 16
139	  7	89.3	14.7	 16
140	  7	69.5	8.1	 16
141	  7	79.5	15.4	 16
142	  7	98.5	16.9	 16
143	  7	137.5	27.7	 16
144	  7	99.8	12.7	 16
145	  7	228.0	48.6	 16
146	  7	69.3	10.5	 16
147	  7	98.3	11.9	 16
148	  7	84.5	39.9	 16
149	  7	88.0	26.5	 16
150	  7	66.3	9.3	 16
151	  7	72.0	8.4	 16
152	  7	87.3	20.7	 16
153	  7	89.8	15.4	 16
154	  7	140.3	22.6	 16
155	  7	85.3	15.3	 16
156	  7	670.0	70.3	 16
157	  7	668.8	37.6	 16
158	  7	150.0	23.9	 16
159	  7	174.0	17.2	 16
160	  7	109.3	20.5	 16
161	  7	86.8	13.8	 16
162	  7	92.3	9.3	 16
163	  7	94.3	11.0	 16
164	  7	73.0	17.0	 16
165	  7	116.5	13.4	 16
166	  7	79.3	13.1	 16
167	  7	80.5	31.3	 16
168	  7	81.3	10.5	 16
169	  7	124.3	22.8	 16
170	  7	168.5	24.5	 16
171	  7	174.5	46.3	 16
172	  7	68.0	14.8	 16
173	  7	75.3	13.0	 16
174	  7	338.0	48.1	 16
175	  7	85.0	26.3	 16
176	  7	139.0	16.2	 16
177	  7	53.3	5.2	 16
178	  7	67.8	11.7	 16
179	  7	74.8	17.3	 16
180	  7	205.3	26.6	 16
181	  7	84.5	17.6	 16
182	  7	185.0	31.1	 16
183	  7	65.3	12.9	 16
184	  7	62.5	10.2	 16
185	  7	76.3	11.6	 16
186	  7	106.0	22.7	 16
187	  7	89.3	15.8	 16
188	  7	119.3	20.5	 16
189	  7	129.0	20.6	 16
190	  7	95.3	13.6	 16
191	  7	105.3	21.4	 16
192	  7	110.0	20.7	 16
193	  7	111.5	22.6	 16
194	  7	125.3	14.6	 16
195	  7	81.8	16.8	 16
196	  7	75.0	21.3	 16
197	  7	76.8	12.0	 16
198	  7	99.5	21.2	 16
199	  7	445.3	85.4	 16
200	  7	178.3	26.9	 16
201	  7	90.0	12.6	 16
202	  7	74.5	11.0	 16
203	  7	89.5	8.3	 16
204	  7	106.3	18.8	 16
205	  7	66.3	13.2	 16
206	  7	142.3	30.3	 16
207	  7	73.5	10.8	 16
208	  7	63.8	16.6	 16
209	  7	61.0	10.2	 16
210	  7	67.3	12.2	 16
211	  7	84.8	16.5	 16
212	  7	95.8	10.6	 16
213	  7	75.8	16.2	 16
214	  7	92.8	20.0	 16
215	  7	103.8	19.0	 16
216	  7	69.8	12.7	 16
217	  7	118.0	27.1	 16
218	  7	89.5	15.5	 16
219	  7	63.3	12.4	 16
220	  7	100.8	25.6	 16
221	  7	102.3	22.9	 16
222	  7	317.5	53.8	 20
223	  7	77.8	11.0	 16
224	  7	71.3	15.0	 16
225	  7	107.8	15.7	 16
226	  7	142.5	18.5	 16
227	  7	122.5	19.2	 16
228	  7	155.5	19.3	 16
229	  7	67.3	10.9	 16
230	  7	71.3	11.9	 16
231	  7	257.0	49.0	 16
232	  7	73.0	15.6	 16
233	  7	84.0	15.3	 16
234	  7	74.3	12.4	 16
235	  7	81.5	15.0	 16
236	  7	156.3	24.1	 16
237	  7	46.5	9.0	 16
238	  7	56.5	8.5	 16
239	  7	346.3	51.6	 16
240	  7	63.3	8.9	 16
241	  7	105.5	14.9	 16
242	  7	114.0	20.9	 16
243	  7	109.8	108.5	 16
244	  7	234.5	57.4	 16
245	  7	85.8	17.0	 16
246	  7	59.8	12.5	 16
247	  7	95.5	18.3	 16
248	  7	65.3	10.8	 16
249	  7	81.0	16.8	 16
250	  7	64.0	7.5	 16
251	  7	112.0	18.4	 16
252	  7	170.3	22.2	 16
253	  7	55.0	5.7	 16
254	  7	82.5	10.8	 16
255	  7	82.8	10.1	 16
256	  7	57.8	10.5	 16
257	  7	83.0	13.7	 16
258	  7	64.3	9.8	 16
259	  7	112.3	14.2	 16
260	  7	108.8	16.5	 16
261	  7	190.5	21.3	 16
262	  7	71.5	15.5	 16
263	  7	930.3	101.1	 16
264	  7	74.3	20.2	 16
265	  7	77.3	13.3	 16
266	  7	69.3	10.9	 16
267	  7	146.5	25.2	 16
268	  7	197.8	21.7	 16
269	  7	53.5	8.2	 16
270	  7	63.5	9.7	 16
271	  7	119.8	47.9	 16
272	  7	183.5	26.3	 16
273	  7	74.5	11.7	 16
274	  7	108.5	18.8	 16
275	  7	89.3	15.6	 16
276	  7	164.0	23.4	 16
277	  7	107.3	20.8	 16
278	  7	120.3	16.7	 16
279	  7	76.0	12.9	 16
280	  7	78.0	10.3	 16
281	  7	104.3	20.3	 16
282	  7	494.8	92.5	 16
283	  7	85.5	13.8	 16
284	  7	76.8	13.1	 16
285	  7	72.3	8.0	 16
286	  7	76.3	8.3	 16
287	  7	171.8	42.3	 16
288	  7	124.3	19.7	 16
289	  7	149.3	23.0	 16
290	  7	115.0	18.8	 16
291	  7	166.0	26.8	 16
292	  7	62.5	13.6	 16
293	  7	124.0	31.1	 16
294	  7	102.0	18.3	 16
295	  7	84.0	13.2	 16
296	  7	88.0	17.0	 16
297	  7	73.8	16.2	 16
298	  7	191.0	20.7	 16
299	  7	169.8	22.0	 16
300	  7	178.3	20.7	 16
301	  7	260.5	30.4	 16
302	  7	73.5	14.1	 16
303	  7	146.8	21.4	 16
304	  7	92.8	17.1	 16
305	  7	53.0	9.3	 16
306	  7	750.8	76.9	 16
307	  7	79.5	11.2	 16
308	  7	162.3	24.6	 16
309	  7	110.3	20.1	 16
310	  7	115.0	22.6	 16
311	  7	201.8	31.2	 16
312	  7	104.3	29.9	 16
313	  7	181.0	23.8	 16
314	  7	178.0	25.1	 16
315	  7	156.0	25.7	 16
316	  7	265.5	37.6	 16
317	  7	92.5	61.9	 16
318	  7	82.0	26.4	 16
319	  7	89.8	14.5	 16
320	  7	61.3	12.0	 16
321	  7	148.5	13.5	 16
322	  7	117.5	14.1	 16
323	  7	91.3	15.2	 16
324	  7	169.3	49.3	 16
325	  7	225.8	35.1	 16
326	  7	672.3	82.9	 16
327	  7	183.8	19.8	 16
328	  7	69.3	16.4	 16
329	  7	145.5	26.3	 16
330	  7	313.3	47.0	 16
331	  7	135.0	24.1	 16
332	  7	113.3	19.1	 16
333	  7	5246.0	802.6	 16
334	  7	5056.8	492.3	 16
335	  7	119.3	15.3	 16
336	  7	73.0	12.0	 16
337	  7	71.0	10.9	 16
338	  7	82.0	11.7	 16
339	  7	109.0	19.7	 16
340	  7	132.3	18.3	 16
341	  7	84.5	12.1	 16
342	  7	110.5	25.8	 16
343	  7	61.3	10.0	 16
344	  7	94.0	18.4	 16
345	  7	108.0	21.5	 16
346	  7	115.3	18.8	 16
347	  7	258.3	33.2	 16
348	  7	184.0	30.1	 16
349	  7	71.5	7.8	 16
350	  7	91.3	12.9	 16
351	  7	64.8	8.9	 16
352	  7	204.3	35.6	 16
353	  7	86.0	11.8	 16
354	  7	59.5	11.5	 16
355	  7	119.8	28.3	 16
356	  7	120.8	23.7	 16
357	  7	198.0	36.3	 16
358	  7	758.3	88.7	 16
359	  7	168.3	23.2	 16
360	  7	128.5	28.0	 16
361	  7	79.5	16.0	 16
362	  7	77.0	15.1	 16
363	  7	69.8	14.7	 16
364	  7	53.5	9.6	 20
365	  7	86.3	14.3	 16
366	  7	137.8	26.6	 16
367	  7	173.3	151.7	 16
368	  7	80.3	12.0	 16
369	  7	96.3	14.4	 16
370	  7	153.5	41.8	 16
371	  7	138.8	19.4	 16
372	  7	189.3	41.6	 16
373	  7	123.8	34.3	 16
374	  7	119.3	19.6	 16
375	  7	53.3	14.4	 16
376	  7	65.5	16.1	 16
377	  7	84.8	13.2	 16
378	  7	135.3	17.6	 12
379	  7	196.5	22.4	 16
380	  7	184.5	30.9	 16
381	  7	85.5	18.2	 16
382	  7	109.3	17.2	 16
383	  7	1133.8	74.7	 16
384	  7	92.8	16.3	 16
385	  7	82.3	12.0	 16
386	  7	83.5	12.2	 16
387	  7	166.0	50.8	 16
388	  7	126.5	22.1	 16
389	  7	56.3	8.1	 16
390	  7	71.5	11.3	 16
391	  7	95.0	17.9	 16
392	  7	60.0	11.6	 16
393	  7	76.8	29.1	 16
394	  7	116.8	18.4	 16
395	  7	238.3	23.5	 16
396	  7	320.5	36.1	 16
397	  7	267.5	42.6	 16
398	  7	58.8	9.2	 16
399	  7	73.8	16.2	 16
400	  7	74.3	10.3	 16
401	  7	128.0	23.9	 16
402	  7	154.0	23.0	 16
403	  7	85.5	11.5	 16
404	  7	71.5	18.0	 16
405	  7	58.3	25.5	 16
406	  7	216.0	36.0	 16
407	  7	73.5	11.5	 16
408	  7	68.3	17.0	 16
409	  7	74.0	14.3	 16
410	  7	96.5	50.7	 16
411	  7	119.8	21.1	 16
412	  7	122.3	12.4	 16
413	  7	336.5	48.2	 16
414	  7	72.5	11.0	 16
415	  7	74.5	18.6	 16
416	  7	69.3	16.6	 16
417	  7	70.8	9.4	 16
418	  7	171.5	30.2	 16
419	  7	58.3	8.6	 16
420	  7	46.3	7.2	 16
421	  7	61.0	12.5	 16
422	  7	64.0	14.6	 16
423	  7	116.8	24.4	 16
424	  7	390.0	38.4	 16
425	  7	121.0	14.9	 16
426	  7	306.0	45.8	 16
427	  7	155.8	19.1	 16
428	  7	109.8	14.6	 16
429	  7	63.3	8.2	 16
430	  7	67.5	13.7	 16
431	  7	72.5	9.3	 16
432	  7	90.5	9.9	 16
433	  7	70.0	12.1	 16
434	  7	116.3	18.6	 16
435	  7	119.5	15.2	 16
436	  7	108.5	18.3	 16
437	  7	80.5	13.6	 16
438	  7	97.5	18.9	 16
439	  7	68.0	11.7	 16
440	  7	80.3	11.2	 16
441	  7	138.5	23.8	 16
442	  7	106.3	17.2	 16
443	  7	132.0	20.2	 16
444	  7	104.0	12.2	 16
445	  7	77.0	18.4	 16
446	  7	116.5	33.4	 16
447	  7	189.3	29.0	 16
448	  7	250.5	28.1	 16
449	  7	196.3	26.4	 16
450	  7	230.0	26.9	 16
451	  7	79.0	31.6	 16
452	  7	180.0	28.6	 16
453	  7	158.8	25.7	 16
454	  7	311.8	26.9	 16
455	  7	174.5	29.3	 16
456	  7	182.0	28.0	 16
457	  7	84.8	16.2	 16
458	  7	66.0	10.6	 16
459	  7	73.3	13.4	 16
460	  7	191.8	29.9	 16
461	  7	56.8	12.8	 16
462	  7	164.8	29.3	 16
463	  7	65.8	13.5	 16
464	  7	56.5	11.3	 16
465	  7	71.3	14.1	 16
466	  7	85.5	21.0	 16
467	  7	118.8	15.8	 16
468	  7	78.5	18.1	 16
469	  7	73.3	13.6	 16
470	  7	133.3	30.9	 16
471	  7	68.0	8.7	 16
472	  7	79.8	13.5	 16
473	  7	88.3	16.2	 16
474	  7	73.8	74.0	 16
475	  7	72.5	10.3	 16
476	  7	59.0	13.5	 16
477	  7	75.5	10.4	 16
478	  7	57.3	12.8	 16
479	  7	58.8	11.2	 16
480	  7	52.5	9.9	 16
481	  7	70.0	15.5	 16
482	  7	73.5	12.5	 16
483	  7	210.0	33.9	 16
484	  7	68.3	11.7	 16
485	  7	108.3	14.9	 16
486	  7	133.5	22.0	 16
487	  7	169.0	20.8	 16
488	  7	186.3	17.4	 16
489	  7	75.5	14.3	 16
490	  7	89.3	18.6	 16
491	  7	62.8	50.9	 16
492	  7	74.0	10.6	 16
493	  7	152.8	29.2	 16
494	  7	126.0	15.4	 16
495	  7	296.3	26.6	 16
496	  7	79.5	15.7	 16
497	  7	99.3	18.5	 16
498	  7	105.0	13.5	 16
499	  7	83.5	20.5	 16
500	  7	124.0	48.1	 16
501	  7	82.5	7.0	 16
502	  7	251.3	52.8	 16
503	  7	351.0	39.5	 16
504	  7	135.0	40.5	 16
505	  7	110.5	20.2	 16
506	  7	130.3	19.6	 16
507	  7	117.5	23.9	 20
508	  7	95.5	16.9	 16
509	  7	104.8	17.5	 16
510	  7	72.3	8.9	 16
511	  7	85.0	19.1	 16
512	  7	75.0	13.8	 16
513	  7	66.8	15.6	 16
514	  7	61.5	12.6	 16
515	  7	58.8	10.4	 16
516	  7	56.0	10.7	 16
517	  7	216.0	31.5	 16
518	  7	110.3	19.2	 16
519	  7	125.8	26.0	 16
520	  7	71.3	12.7	 16
521	  7	83.3	13.7	 16
522	  7	87.0	19.9	 16
523	  7	80.3	12.1	 16
524	  7	76.0	10.7	 16
525	  7	59.3	18.4	 16
526	  7	49.0	8.3	 16
527	  7	68.5	8.6	 16
528	  7	82.5	16.0	 16
529	  7	80.3	17.5	 16
530	  7	114.3	15.4	 16
531	  7	88.8	18.4	 16
532	  7	169.8	22.7	 16
533	  7	68.5	15.0	 16
534	  7	136.0	53.2	 16
535	  7	100.0	35.2	 16
536	  7	126.5	14.7	 16
537	  7	98.5	15.1	 16
538	  7	139.8	26.7	 16
539	  7	460.0	51.3	 16
540	  7	178.3	24.9	 16
541	  7	81.0	19.0	 16
542	  7	77.0	42.4	 16
543	  7	69.8	12.5	 16
544	  7	71.8	74.2	 16
545	  7	63.0	10.2	 16
546	  7	111.5	19.3	 16
547	  7	108.8	23.4	 16
548	  7	183.3	23.8	 16
549	  7	186.5	25.8	 16
550	  7	77.3	16.4	 16
551	  7	130.0	16.1	 16
552	  7	161.0	20.3	 16
553	  7	80.5	13.4	 16
554	  7	86.3	17.1	 16
555	  7	54.3	6.7	 16
556	  7	63.0	16.6	 16
557	  7	74.3	15.5	 16
558	  7	172.5	37.2	 16
559	  7	418.3	45.5	 16
560	  7	57.0	8.7	 16
561	  7	94.3	16.1	 16
562	  7	122.5	21.9	 16
563	  7	289.5	23.0	 16
564	  7	107.0	19.1	 16
565	  7	146.5	23.1	 16
566	  7	62.3	30.7	 16
567	  7	63.0	10.4	 16
568	  7	97.5	17.7	 16
569	  7	130.8	29.8	 16
570	  7	102.0	20.2	 16
571	  7	86.0	14.7	 16
572	  7	74.8	8.0	 16
573	  7	103.3	16.0	 16
574	  7	86.0	12.3	 16
575	  7	162.8	31.4	 16
576	  7	62.5	16.2	 16
577	  7	314.0	44.8	 16
578	  7	84.8	17.6	 16
579	  7	74.0	14.3	 16
580	  7	99.3	14.9	 16
581	  7	119.5	25.8	 16
582	  7	150.5	15.4	 16
583	  7	70.8	18.0	 16
584	  7	92.3	14.3	 16
585	  7	100.5	18.9	 16
586	  7	62.8	11.2	 16
587	  7	88.3	10.6	 16
588	  7	73.8	11.1	 16
589	  7	90.5	20.9	 16
590	  7	78.8	13.3	 16
591	  7	92.3	19.3	 16
592	  7	700.3	162.0	 16
593	  7	429.5	74.6	 16
594	  7	67.5	11.5	 16
595	  7	64.5	11.1	 16
596	  7	103.3	18.9	 16
597	  7	75.0	15.8	 16
598	  7	105.8	17.2	 16
599	  7	69.3	14.2	 16
600	  7	64.5	11.9	 16
601	  7	64.0	12.8	 16
602	  7	67.3	11.1	 16
603	  7	96.3	20.4	 16
604	  7	223.8	34.4	 16
605	  7	80.8	11.2	 16
606	  7	87.0	14.3	 16
607	  7	93.8	17.5	 16
608	  7	57.8	9.3	 16
609	  7	88.5	12.1	 16
610	  7	165.0	31.4	 16
611	  7	207.3	24.6	 16
612	  7	100.3	15.0	 16
613	  7	77.0	15.9	 16
614	  7	80.0	11.3	 16
615	  7	92.0	18.6	 16
616	  7	89.3	12.8	 16
617	  7	174.0	30.7	 16
618	  7	71.3	13.8	 16
619	  7	144.3	20.5	 16
620	  7	137.8	19.8	 16
621	  7	197.8	43.5	 16
622	  7	105.5	14.7	 16
623	  7	76.5	12.3	 16
624	  7	57.8	9.7	 16
625	  7	164.0	27.6	 16
626	  7	99.3	13.4	 16
627	  7	171.3	25.0	 16
628	  7	167.5	22.8	 16
629	  7	66.8	11.5	 16
630	  7	143.5	23.5	 16
631	  7	177.0	24.8	 16
632	  7	163.5	32.1	 16
633	  7	141.3	24.3	 16
634	  7	104.0	18.0	 16
635	  7	115.3	27.1	 16
636	  7	104.0	22.7	 16
637	  7	311.8	73.7	 16
638	  7	69.5	10.3	 16
639	  7	112.3	72.0	 16
640	  7	53.3	12.7	 16
641	  7	97.5	17.5	 16
642	  7	121.5	20.9	 16
643	  7	56.3	9.5	 16
644	  7	283.3	51.3	 16
645	  7	85.0	15.6	 16
646	  7	158.8	37.6	 16
647	  7	225.3	36.7	 16
648	  7	202.3	24.5	 16
649	  7	579.3	110.1	 20
650	  7	76.0	11.6	 16
651	  7	95.0	21.9	 16
652	  7	110.0	25.0	 16
653	  7	96.0	11.6	 16
654	  7	96.3	18.0	 16
655	  7	92.0	14.8	 16
656	  7	82.5	17.7	 16
657	  7	112.0	15.9	 16
658	  7	130.5	26.6	 16
659	  7	452.8	79.3	 16
660	  7	68.5	13.2	 16
661	  7	169.8	27.2	 16
662	  7	74.3	13.9	 16
663	  7	128.3	20.1	 16
664	  7	182.8	24.1	 16
665	  7	247.3	24.0	 16
666	  7	249.0	37.8	 16
667	  7	246.8	26.5	 16
668	  7	335.0	48.2	 16
669	  7	157.5	18.0	 16
670	  7	241.8	36.9	 16
671	  7	71.3	11.8	 16
672	  7	73.3	11.8	 16
673	  7	78.5	13.8	 16
674	  7	71.3	18.2	 16
675	  7	72.3	10.9	 16
676	  7	436.5	79.5	 16
677	  7	70.0	26.4	 16
678	  7	197.0	33.8	 16
679	  7	130.0	13.9	 16
680	  7	144.8	22.3	 16
681	  7	208.3	30.5	 16
682	  7	112.8	18.6	 16
683	  7	221.8	25.6	 16
684	  7	144.3	18.5	 16
685	  7	162.3	24.1	 16
686	  7	182.0	17.6	 16
687	  7	2057.5	354.8	 16
688	  7	127.0	16.7	 16
689	  7	143.5	26.4	 16
690	  7	135.5	23.7	 16
691	  7	207.5	55.1	 16
692	  7	185.3	26.1	 16
693	  7	301.3	34.7	 16
694	  7	97.5	17.4	 16
695	  7	72.5	8.9	 16
696	  7	73.0	12.9	 16
697	  7	72.0	10.6	 16
698	  7	77.3	14.1	 16
699	  7	224.0	30.5	 16
700	  7	99.3	11.3	 16
701	  7	100.3	12.0	 16
702	  7	138.0	19.2	 16
703	  7	88.3	13.4	 16
704	  7	101.5	22.7	 16
705	  7	88.8	13.1	 16
706	  7	237.8	24.2	 16
707	  7	242.0	28.2	 16
708	  7	108.0	12.8	 16
709	  7	158.0	20.0	 16
710	  7	159.8	24.7	 16
711	  7	112.8	18.2	 16
  0	  8	8176.5	776.4	 16
  1	  8	95.3	23.1	 16
  2	  8	121.3	35.0	 16
  3	  8	162.3	22.7	 16
  4	  8	75.3	12.3	 16
  5	  8	72.3	13.1	 16
  6	  8	76.0	12.5	 16
  7	  8	77.3	11.5	 16
  8	  8	97.3	17.9	 16
  9	  8	355.5	50.7	 16
 10	  8	134.0	20.6	 16
 11	  8	80.5	11.8	 16
 12	  8	9370.5	674.1	 16
 13	  8	138.5	28.0	 16
 14	  8	131.5	16.8	 16
 15	  8	8157.0	802.1	 16
 16	  8	9632.8	907.6	 16
 17	  8	104.8	16.1	 16
 18	  8	8995.5	1096.0	 16
 19	  8	153.8	20.9	 16
 20	  8	152.5	24.6	 16
 21	  8	143.5	15.9	 16
 22	  8	8306.3	1686.7	 16
 23	  8	106.3	14.9	 16
 24	  8	9856.8	471.4	 16
 25	  8	8175.8	1615.6	 16
 26	  8	152.5	23.0	 16
 27	  8	147.0	19.8	 16
 28	  8	8963.8	760.8	 16
 29	  8	110.3	22.8	 16
 30	  8	9027.0	825.4	 16
 31	  8	166.3	20.5	 16
 32	  8	144.5	23.2	 16
 33	  8	161.5	26.7	 16
 34	  8	8383.5	1095.8	 16
 35	  8	91.5	13.8	 16
 36	  8	9362.3	646.0	 16
 37	  8	149.5	28.8	 16
 38	  8	112.8	19.0	 16
 39	  8	119.5	21.7	 16
 40	  8	124.3	16.6	 16
 41	  8	81.3	15.3	 16
 42	  8	10264.5	724.0	 16
 43	  8	8430.3	914.0	 16
 44	  8	146.0	21.6	 16
 45	  8	127.8	18.4	 16
 46	  8	9058.0	1034.9	 16
 47	  8	96.8	14.7	 16
 48	  8	155.5	60.9	 16
 49	  8	120.3	18.9	 16
 50	  8	123.3	24.1	 16
 51	  8	110.0	18.4	 16
 52	  8	113.8	17.5	 16
 53	  8	76.5	11.4	 16
 54	  8	9184.5	747.7	 16
 55	  8	154.3	24.6	 16
 56	  8	135.0	17.8	 16
 57	  8	6545.5	778.5	 16
 58	  8	143.3	20.9	 16
 59	  8	71.8	17.5	 16
 60	  8	69.3	11.1	 16
 61	  8	82.3	14.7	 16
 62	  8	9944.5	829.4	 16
 63	  8	8127.3	1080.5	 16
 64	  8	7564.3	1029.1	 16
 65	  8	8054.8	1094.0	 16
 66	  8	10019.5	390.9	 16
 67	  8	107.8	26.3	 16
 68	  8	9481.8	750.4	 16
 69	  8	141.0	25.3	 16
 70	  8	121.0	16.2	 16
 71	  8	7426.5	1453.7	 16
 72	  8	8688.5	454.6	 16
 73	  8	114.5	20.9	 16
 74	  8	135.5	24.9	 16
 75	  8	6421.5	1148.0	 16
 76	  8	6516.5	878.3	 16
 77	  8	6405.0	882.8	 16
 78	  8	130.8	18.2	 16
 79	  8	67.0	8.7	 16
 80	  8	8879.0	1209.2	 16
 81	  8	133.5	28.1	 20
 82	  8	119.8	28.2	 16
 83	  8	122.3	15.1	 16
 84	  8	9001.5	1186.1	 16
 85	  8	87.0	16.9	 16
 86	  8	108.0	12.4	 16
 87	  8	135.5	20.8	 16
 88	  8	7802.5	976.3	 16
 89	  8	129.0	19.5	 16
 90	  8	114.0	13.9	 16
 91	  8	71.5	11.7	 16
 92	  8	110.5	22.2	 16
 93	  8	7056.0	723.7	 16
 94	  8	7109.3	854.9	 16
 95	  8	131.3	42.1	 16
 96	  8	114.0	22.3	 16
 97	  8	63.3	8.9	 16
 98	  8	113.0	15.6	 16
 99	  8	7155.0	750.7	 16
100	  8	6909.0	863.5	 16
101	  8	126.3	27.2	 16
102	  8	100.3	14.4	 16
103	  8	83.3	12.7	 16
104	  8	116.0	17.0	 16
105	  8	8047.5	494.1	 16
106	  8	7702.5	902.3	 16
107	  8	8029.3	792.5	 16
108	  8	124.3	12.6	 16
109	  8	68.8	10.9	 16
110	  8	53.8	9.5	 16
111	  8	84.0	11.4	 16
112	  8	98.0	17.2	 16
113	  8	118.8	20.1	 16
114	  8	71.3	10.4	 16
115	  8	97.8	28.0	 16
116	  8	96.0	14.5	 16
117	  8	119.5	73.9	 16
118	  8	93.0	13.5	 16
119	  8	183.5	25.6	 16
120	  8	183.3	25.0	 16
121	  8	221.0	25.0	 16
122	  8	159.3	41.0	 16
123	  8	90.8	13.0	 16
124	  8	94.3	18.6	 16
125	  8	404.3	51.6	 16
126	  8	679.5	126.1	 16
127	  8	855.3	134.6	 16
128	  8	728.8	153.6	 16
129	  8	86.3	14.7	 16
130	  8	73.0	12.2	 16
131	  8	298.0	56.1	 16
132	  8	76.5	11.3	 16
133	  8	181.8	20.5	 16
134	  8	1449.5	107.8	 16
135	  8	420.3	33.8	 16
136	  8	195.5	28.0	 16
137	  8	117.5	21.5	 16
138	  8	101.0	11.2	 16
139	  8	69.0	9.1	 16
140	  8	71.8	10.9	 16
141	  8	89.3	17.0	 16
142	  8	91.0	12.2	 16
143	  8	86.3	15.3	 16
144	  8	81.5	25.3	 16
145	  8	92.3	15.8	 16
146	  8	63.5	12.1	 16
147	  8	141.5	94.6	 16
148	  8	81.0	24.3	 16
149	  8	69.0	9.5	 16
150	  8	78.0	14.9	 16
151	  8	83.3	16.6	 16
152	  8	91.8	27.5	 16
153	  8	73.0	14.8	 16
154	  8	118.0	22.4	 16
155	  8	70.0	12.9	 16
156	  8	437.3	62.4	 16
157	  8	444.3	59.0	 16
158	  8	102.8	15.8	 16
159	  8	236.3	24.7	 16
160	  8	128.8	16.9	 16
161	  8	75.3	30.0	 16
162	  8	158.0	30.1	 16
163	  8	108.0	18.1	 16
164	  8	81.5	21.7	 16
165	  8	107.3	15.6	 16
166	  8	71.3	15.7	 16
167	  8	66.5	10.5	 16
168	  8	87.0	19.1	 16
169	  8	80.0	15.5	 16
170	  8	78.3	16.4	 16
171	  8	86.5	13.8	 16
172	  8	147.5	104.5	 16
173	  8	64.3	8.7	 16
174	  8	82.0	12.0	 16
175	  8	87.5	12.5	 16
176	  8	72.3	11.0	 16
177	  8	71.3	11.8	 16
178	  8	83.5	14.2	 16
179	  8	88.0	26.8	 16
180	  8	165.8	19.5	 16
181	  8	72.5	10.9	 16
182	  8	75.3	13.6	 16
183	  8	55.3	10.6	 16
184	  8	60.0	10.0	 16
185	  8	81.0	13.2	 16
186	  8	106.8	15.6	 16
187	  8	66.0	13.5	 16
188	  8	83.5	15.4	 16
189	  8	124.3	20.0	 16
190	  8	89.0	15.8	 16
191	  8	81.3	7.9	 16
192	  8	69.8	12.6	 16
193	  8	70.5	11.7	 16
194	  8	124.8	24.7	 16
195	  8	76.8	13.8	 16
196	  8	82.3	10.3	 16
197	  8	82.8	15.7	 16
198	  8	83.5	16.9	 16
199	  8	124.5	22.3	 16
200	  8	125.8	21.2	 16
201	  8	72.3	11.3	 16
202	  8	81.3	10.9	 16
203	  8	69.3	16.2	 16
204	  8	81.8	14.1	 16
205	  8	59.5	11.0	 16
206	  8	99.0	17.7	 16
207	  8	75.0	17.0	 16
208	  8	58.0	9.3	 16
209	  8	48.3	8.1	 16
210	  8	67.3	19.7	 16
211	  8	132.3	20.2	 16
212	  8	64.0	11.3	 16
213	  8	74.0	11.2	 16
214	  8	74.3	14.8	 16
215	  8	75.8	11.6	 16
216	  8	69.5	18.3	 16
217	  8	88.8	18.3	 16
218	  8	68.8	14.1	 16
219	  8	65.8	17.1	 16
220	  8	68.5	11.5	 16
221	  8	83.3	13.2	 16
222	  8	68.5	11.4	 16
223	  8	65.0	12.4	 20
224	  8	66.3	32.4	 16
225	  8	128.3	18.1	 16
226	  8	127.5	26.5	 16
227	  8	158.0	30.3	 16
228	  8	159.8	43.3	 16
229	  8	62.3	11.5	 16
230	  8	72.5	11.7	 16
231	  8	83.3	11.5	 16
232	  8	69.3	14.1	 16
233	  8	71.3	12.6	 16
234	  8	66.0	9.8	 16
235	  8	81.3	15.8	 16
236	  8	102.8	18.6	 16
237	  8	62.8	13.2	 16
238	  8	62.3	14.3	 16
239	  8	154.0	22.7	 16
240	  8	66.0	10.6	 16
241	  8	83.3	11.1	 16
242	  8	88.3	13.2	 16
243	  8	77.5	12.3	 16
244	  8	74.0	11.9	 16
245	  8	69.8	14.1	 16
246	  8	58.3	9.2	 16
247	  8	86.0	12.9	 16
248	  8	67.0	16.2	 16
249	  8	75.3	10.1	 16
250	  8	72.5	11.7	 16
251	  8	131.8	19.9	 16
252	  8	156.5	32.0	 16
253	  8	78.5	14.2	 16
254	  8	73.3	12.6	 16
255	  8	90.8	16.8	 16
256	  8	100.0	170.2	 16
257	  8	96.3	20.4	 16
258	  8	60.5	12.0	 16
259	  8	95.3	18.0	 16
260	  8	93.5	21.4	 16
261	  8	111.5	15.5	 16
262	  8	79.3	14.6	 16
263	  8	313.5	40.3	 16
264	  8	68.5	10.8	 16
265	  8	66.0	17.0	 16
266	  8	69.5	13.3	 16
267	  8	82.8	14.3	 16
268	  8	126.0	26.9	 16
269	  8	58.3	12.3	 16
270	  8	54.0	9.5	 16
271	  8	120.0	20.0	 16
272	  8	175.3	30.7	 16
273	  8	63.3	11.2	 16
274	  8	72.0	15.3	 16
275	  8	87.3	14.9	 16
276	  8	175.0	23.3	 16
277	  8	121.5	20.2	 16
278	  8	116.8	40.8	 16
279	  8	74.5	13.2	 16
280	  8	63.5	14.4	 16
281	  8	93.3	12.8	 16
282	  8	156.8	22.3	 16
283	  8	111.8	19.0	 16
284	  8	76.0	15.5	 16
285	  8	60.3	11.6	 16
286	  8	86.3	13.6	 16
287	  8	74.3	12.2	 16
288	  8	85.5	13.8	 16
289	  8	152.5	22.7	 16
290	  8	162.3	26.9	 16
291	  8	108.0	20.3	 16
292	  8	71.8	15.0	 16
293	  8	160.5	65.6	 16
294	  8	117.0	22.2	 16
295	  8	95.5	16.6	 16
296	  8	95.5	29.6	 16
297	  8	76.0	16.8	 16
298	  8	201.3	22.6	 16
299	  8	150.5	30.0	 16
300	  8	183.0	27.6	 16
301	  8	124.3	19.7	 16
302	  8	64.0	11.7	 16
303	  8	101.3	19.6	 16
304	  8	83.0	12.7	 16
305	  8	78.3	12.8	 16
306	  8	269.5	22.4	 16
307	  8	86.8	25.0	 16
308	  8	108.5	16.1	 16
309	  8	101.8	17.2	 16
310	  8	116.8	18.0	 16
311	  8	195.3	23.9	 16
312	  8	122.0	116.1	 16
313	  8	216.0	35.8	 16
314	  8	178.5	24.3	 16
315	  8	99.3	16.1	 16
316	  8	104.0	22.1	 16
317	  8	82.5	16.5	 16
318	  8	83.8	17.6	 16
319	  8	68.0	29.5	 16
320	  8	57.5	13.8	 16
321	  8	129.0	21.1	 16
322	  8	93.3	12.6	 16
323	  8	85.3	15.5	 16
324	  8	159.3	29.1	 16
325	  8	129.5	17.3	 16
326	  8	454.3	37.3	 16
327	  8	102.0	13.3	 16
328	  8	65.0	9.8	 16
329	  8	160.0	16.8	 16
330	  8	490.3	48.4	 16
331	  8	150.5	42.1	 16
332	  8	84.8	19.8	 16
333	  8	1504.3	185.4	 16
334	  8	1386.0	330.5	 16
335	  8	92.3	12.8	 16
336	  8	72.5	12.4	 16
337	  8	73.5	17.1	 16
338	  8	74.8	10.5	 16
339	  8	72.3	13.4	 16
340	  8	130.0	18.2	 16
341	  8	81.3	15.9	 16
342	  8	84.5	15.4	 16
343	  8	70.3	141.0	 16
344	  8	83.0	9.1	 16
345	  8	94.8	15.5	 16
346	  8	145.5	18.7	 16
347	  8	414.5	42.5	 16
348	  8	167.8	23.6	 16
349	  8	76.3	14.1	 16
350	  8	97.8	16.3	 16
351	  8	65.5	15.7	 16
352	  8	127.8	23.3	 16
353	  8	79.5	14.6	 16
354	  8	65.3	12.4	 16
355	  8	113.0	18.0	 16
356	  8	96.5	16.3	 16
357	  8	163.5	30.8	 16
358	  8	510.3	86.6	 16
359	  8	144.0	24.0	 16
360	  8	95.3	14.5	 16
361	  8	60.3	10.7	 16
362	  8	65.3	16.9	 16
363	  8	76.3	11.6	 16
364	  8	60.5	9.4	 16
365	  8	81.5	19.0	 16
366	  8	107.3	17.5	 20
367	  8	82.3	8.5	 16
368	  8	81.5	12.0	 16
369	  8	120.5	18.4	 16
370	  8	90.3	14.4	 16
371	  8	89.5	14.5	 16
372	  8	114.8	22.0	 16
373	  8	136.8	47.0	 16
374	  8	69.5	19.9	 16
375	  8	50.0	7.9	 16
376	  8	54.5	10.6	 16
377	  8	79.3	11.4	 16
378	  8	185.5	22.4	 16
379	  8	112.0	21.3	 16
380	  8	118.5	18.9	 16
381	  8	67.0	11.6	 16
382	  8	59.0	6.1	 16
383	  8	626.8	78.5	 16
384	  8	111.5	15.5	 16
385	  8	71.8	8.8	 16
386	  8	96.5	15.3	 16
387	  8	146.8	25.6	 16
388	  8	195.5	39.9	 16
389	  8	55.3	8.4	 16
390	  8	58.8	11.5	 16
391	  8	51.3	4.9	 16
392	  8	60.8	7.9	 16
393	  8	62.0	9.4	 16
394	  8	114.3	24.5	 16
395	  8	230.3	20.5	 16
396	  8	203.8	31.9	 16
397	  8	193.5	26.8	 16
398	  8	53.0	8.6	 16
399	  8	65.8	10.3	 16
400	  8	72.5	17.8	 16
401	  8	221.8	23.4	 16
402	  8	66.0	11.9	 16
403	  8	74.0	13.0	 16
404	  8	72.0	12.6	 16
405	  8	58.3	11.0	 16
406	  8	77.8	10.7	 16
407	  8	62.3	11.5	 16
408	  8	67.8	15.2	 16
409	  8	82.5	17.4	 16
410	  8	72.5	13.5	 16
411	  8	146.0	23.0	 16
412	  8	92.5	12.2	 16
413	  8	111.3	17.2	 16
414	  8	64.3	11.1	 16
415	  8	97.8	11.9	 16
416	  8	55.3	6.9	 16
417	  8	63.5	13.3	 16
418	  8	89.5	14.8	 16
419	  8	65.5	14.3	 16
420	  8	52.0	10.9	 16
421	  8	54.3	17.7	 16
422	  8	66.3	11.3	 16
423	  8	99.3	15.1	 16
424	  8	403.3	58.5	 16
425	  8	108.0	12.5	 16
426	  8	298.8	53.5	 16
427	  8	67.8	12.7	 16
428	  8	71.3	9.9	 16
429	  8	71.3	16.7	 16
430	  8	79.5	13.3	 16
431	  8	81.3	10.7	 16
432	  8	64.0	10.9	 16
433	  8	52.5	7.2	 16
434	  8	94.3	18.2	 16
435	  8	93.3	17.1	 16
436	  8	70.3	13.1	 16
437	  8	99.3	10.5	 16
438	  8	153.5	24.9	 16
439	  8	77.0	22.2	 16
440	  8	70.3	9.1	 16
441	  8	76.5	14.7	 16
442	  8	79.3	24.4	 16
443	  8	89.3	10.3	 16
444	  8	75.5	14.7	 16
445	  8	69.5	9.9	 16
446	  8	82.8	9.3	 16
447	  8	98.5	18.4	 16
448	  8	197.0	30.4	 16
449	  8	1058.5	151.2	 16
450	  8	156.5	16.0	 16
451	  8	63.8	12.9	 16
452	  8	163.5	24.6	 16
453	  8	109.3	22.1	 16
454	  8	216.3	20.6	 16
455	  8	109.5	13.6	 16
456	  8	93.5	23.5	 16
457	  8	68.3	12.4	 16
458	  8	63.0	13.2	 16
459	  8	81.0	20.0	 16
460	  8	146.3	20.4	 16
461	  8	58.3	10.5	 16
462	  8	87.3	18.2	 16
463	  8	66.0	13.2	 16
464	  8	64.5	14.0	 16
465	  8	67.8	14.4	 16
466	  8	69.5	12.7	 16
467	  8	121.5	20.8	 16
468	  8	81.0	18.8	 16
469	  8	60.5	12.6	 16
470	  8	96.5	12.0	 16
471	  8	56.5	10.6	 16
472	  8	72.0	9.7	 16
473	  8	120.0	17.6	 16
474	  8	63.0	15.4	 16
475	  8	60.5	15.5	 16
476	  8	61.5	14.3	 16
477	  8	67.5	11.8	 16
478	  8	54.3	9.1	 16
479	  8	53.3	9.8	 16
480	  8	48.5	10.3	 16
481	  8	61.8	8.0	 16
482	  8	72.5	14.3	 16
483	  8	107.8	18.4	 16
484	  8	125.3	28.9	 16
485	  8	142.0	18.6	 16
486	  8	156.0	23.4	 16
487	  8	172.0	31.6	 16
488	  8	128.0	20.9	 16
489	  8	71.0	10.9	 16
490	  8	74.5	18.9	 16
491	  8	62.3	10.6	 16
492	  8	65.8	13.2	 16
493	  8	106.3	14.5	 16
494	  8	151.3	23.4	 16
495	  8	191.0	36.6	 16
496	  8	75.5	9.8	 16
497	  8	80.3	11.8	 16
498	  8	99.3	42.7	 16
499	  8	78.5	13.7	 16
500	  8	76.8	40.7	 16
501	  8	101.8	15.0	 16
502	  8	118.5	18.9	 16
503	  8	133.0	25.4	 16
504	  8	89.5	15.0	 16
505	  8	71.0	13.0	 16
506	  8	85.0	11.8	 16
507	  8	94.8	14.9	 16
508	  8	72.3	12.6	 20
509	  8	76.0	13.8	 16
510	  8	59.0	11.2	 16
511	  8	67.5	14.6	 16
512	  8	57.0	10.8	 16
513	  8	56.3	11.1	 16
514	  8	57.8	14.8	 16
515	  8	63.0	9.2	 16
516	  8	55.3	10.1	 16
517	  8	68.0	10.4	 16
518	  8	99.0	20.5	 16
519	  8	193.3	21.0	 16
520	  8	93.5	15.1	 16
521	  8	77.0	9.7	 16
522	  8	77.0	13.6	 16
523	  8	80.8	15.9	 16
524	  8	79.0	10.4	 16
525	  8	57.8	9.3	 16
526	  8	53.3	9.9	 16
527	  8	65.0	11.6	 16
528	  8	81.5	11.6	 16
529	  8	57.3	9.4	 16
530	  8	112.8	26.5	 16
531	  8	160.5	23.5	 16
532	  8	196.0	84.4	 16
533	  8	58.3	18.5	 16
534	  8	74.0	15.4	 16
535	  8	95.8	25.0	 16
536	  8	114.5	107.3	 16
537	  8	70.0	14.3	 16
538	  8	213.5	39.8	 16
539	  8	246.0	31.6	 16
540	  8	160.5	27.6	 16
541	  8	74.5	12.6	 16
542	  8	57.0	19.1	 16
543	  8	56.3	9.6	 16
544	  8	64.5	10.9	 16
545	  8	64.5	12.2	 16
546	  8	61.5	8.1	 16
547	  8	72.3	13.0	 16
548	  8	122.5	17.1	 16
549	  8	114.8	16.3	 16
550	  8	82.5	19.9	 16
551	  8	104.8	16.3	 16
552	  8	157.5	22.1	 16
553	  8	104.0	18.5	 16
554	  8	67.0	13.8	 16
555	  8	54.3	11.0	 16
556	  8	57.3	9.8	 16
557	  8	63.3	13.2	 16
558	  8	152.3	19.7	 16
559	  8	276.5	42.6	 16
560	  8	56.5	11.1	 16
561	  8	77.0	10.6	 16
562	  8	107.5	23.5	 16
563	  8	528.5	73.4	 16
564	  8	93.0	16.9	 16
565	  8	76.0	7.8	 16
566	  8	67.5	18.0	 16
567	  8	57.0	11.4	 16
568	  8	66.5	7.0	 16
569	  8	111.0	16.1	 16
570	  8	111.0	20.5	 16
571	  8	98.0	86.6	 16
572	  8	77.3	17.9	 16
573	  8	97.8	16.1	 16
574	  8	99.3	15.7	 16
575	  8	93.8	19.8	 16
576	  8	92.5	16.5	 16
577	  8	87.8	18.4	 16
578	  8	58.0	8.5	 16
579	  8	51.0	9.3	 16
580	  8	76.5	11.1	 16
581	  8	88.8	15.7	 16
582	  8	110.8	15.7	 16
583	  8	65.5	14.7	 16
584	  8	64.3	12.5	 16
585	  8	80.3	15.8	 16
586	  8	74.0	9.5	 16
587	  8	62.0	14.7	 16
588	  8	55.3	11.6	 16
589	  8	102.5	19.6	 16
590	  8	110.3	17.2	 16
591	  8	73.5	11.5	 16
592	  8	173.0	34.5	 16
593	  8	106.3	19.1	 16
594	  8	64.8	11.6	 16
595	  8	73.3	16.0	 16
596	  8	152.0	19.0	 16
597	  8	68.8	12.0	 16
598	  8	93.8	21.3	 16
599	  8	75.8	14.4	 16
600	  8	59.3	9.6	 16
601	  8	56.8	8.3	 16
602	  8	56.5	8.4	 16
603	  8	107.0	17.7	 16
604	  8	117.3	20.0	 16
605	  8	72.8	12.3	 16
606	  8	67.8	12.7	 16
607	  8	81.0	11.5	 16
608	  8	60.3	9.4	 16
609	  8	82.0	9.9	 16
610	  8	61.8	17.9	 16
611	  8	68.5	10.1	 16
612	  8	81.0	19.3	 16
613	  8	63.3	11.1	 16
614	  8	66.3	13.6	 16
615	  8	144.0	23.6	 16
616	  8	101.5	20.9	 16
617	  8	166.3	23.0	 16
618	  8	73.0	15.8	 16
619	  8	105.8	15.7	 16
620	  8	62.3	12.0	 16
621	  8	115.8	14.6	 16
622	  8	71.8	14.9	 16
623	  8	75.3	17.7	 16
624	  8	72.8	14.8	 16
625	  8	107.8	17.3	 16
626	  8	85.0	14.6	 16
627	  8	253.8	40.4	 16
628	  8	200.3	95.3	 16
629	  8	62.5	12.7	 16
630	  8	112.5	13.3	 16
631	  8	158.3	23.4	 16
632	  8	100.8	24.6	 16
633	  8	93.3	14.6	 16
634	  8	107.3	11.0	 16
635	  8	89.8	33.5	 16
636	  8	74.0	11.9	 16
637	  8	86.3	16.5	 16
638	  8	68.0	114.4	 16
639	  8	108.3	70.2	 16
640	  8	60.0	27.0	 16
641	  8	85.5	21.3	 16
642	  8	105.8	22.2	 16
643	  8	61.8	28.2	 16
644	  8	249.0	46.1	 16
645	  8	82.0	49.8	 16
646	  8	177.8	31.3	 16
647	  8	180.8	35.0	 16
648	  8	194.3	32.1	 16
649	  8	177.0	38.7	 16
650	  8	83.0	14.5	 20
651	  8	83.3	18.0	 16
652	  8	108.0	96.3	 16
653	  8	83.5	13.1	 16
654	  8	73.3	12.8	 16
655	  8	74.3	14.5	 16
656	  8	65.5	8.7	 16
657	  8	78.5	9.1	 16
658	  8	71.8	10.8	 16
659	  8	227.3	39.4	 16
660	  8	66.3	13.2	 16
661	  8	86.0	15.0	 16
662	  8	62.5	10.8	 16
663	  8	85.5	17.8	 16
664	  8	120.8	66.6	 16
665	  8	241.3	18.2	 16
666	  8	228.5	25.0	 16
667	  8	295.8	32.0	 16
668	  8	149.3	16.0	 16
669	  8	172.3	18.7	 16
670	  8	199.5	30.9	 16
671	  8	81.5	31.8	 16
672	  8	72.5	14.0	 16
673	  8	81.3	91.9	 16
674	  8	63.5	13.3	 16
675	  8	65.0	13.6	 16
676	  8	91.5	14.2	 16
677	  8	61.5	9.0	 16
678	  8	197.8	28.9	 16
679	  8	86.0	19.9	 16
680	  8	126.3	23.4	 16
681	  8	106.3	12.0	 16
682	  8	139.5	24.4	 16
683	  8	317.5	30.6	 16
684	  8	141.0	34.7	 16
685	  8	159.8	23.7	 16
686	  8	154.5	20.4	 16
687	  8	707.8	77.5	 16
688	  8	120.5	13.4	 16
689	  8	100.5	13.4	 16
690	  8	189.8	23.2	 16
691	  8	187.3	23.7	 16
692	  8	179.8	28.8	 16
693	  8	92.0	18.3	 16
694	  8	63.5	14.0	 16
695	  8	70.0	19.4	 16
696	  8	63.3	10.8	 16
697	  8	80.0	13.6	 16
698	  8	76.0	11.5	 16
699	  8	91.5	16.1	 16
700	  8	79.5	13.6	 16
701	  8	81.3	34.0	 16
702	  8	115.8	15.1	 16
703	  8	84.5	13.2	 16
704	  8	77.5	14.7	 16
705	  8	81.3	14.2	 16
706	  8	209.3	32.1	 16
707	  8	159.8	25.0	 16
708	  8	102.3	18.4	 16
709	  8	142.3	19.8	 16
710	  8	91.3	13.2	 16
711	  8	8518.5	1089.5	 16
  0	  9	110.5	22.6	 16
  1	  9	153.0	16.3	 16
  2	  9	107.3	19.5	 16
  3	  9	95.5	15.4	 16
  4	  9	69.5	10.3	 16
  5	  9	73.5	13.0	 16
  6	  9	444.5	93.8	 16
  7	  9	70.5	10.3	 16
  8	  9	74.0	9.8	 16
  9	  9	75.0	8.5	 16
 10	  9	130.0	18.7	 16
 11	  9	102.3	76.7	 16
 12	  9	9419.8	743.4	 16
 13	  9	155.8	47.3	 16
 14	  9	112.8	14.3	 16
 15	  9	135.0	20.6	 16
 16	  9	9853.5	593.1	 16
 17	  9	90.3	12.0	 16
 18	  9	10316.3	270.6	 16
 19	  9	9124.0	730.9	 16
 20	  9	8811.3	721.3	 16
 21	  9	8513.3	938.5	 16
 22	  9	130.3	19.0	 16
 23	  9	83.3	10.5	 16
 24	  9	10158.3	762.7	 16
 25	  9	135.5	21.9	 16
 26	  9	127.3	19.0	 16
 27	  9	116.3	14.4	 16
 28	  9	9869.3	690.4	 16
 29	  9	105.3	15.7	 16
 30	  9	10195.5	479.6	 16
 31	  9	9001.0	1245.1	 16
 32	  9	8669.8	1231.9	 16
 33	  9	8594.0	1183.9	 16
 34	  9	130.8	16.3	 16
 35	  9	73.3	12.6	 16
 36	  9	9561.5	560.6	 16
 37	  9	134.5	20.4	 16
 38	  9	120.3	16.8	 16
 39	  9	119.3	19.1	 16
 40	  9	121.3	17.9	 16
 41	  9	82.5	18.5	 16
 42	  9	9967.3	615.9	 16
 43	  9	125.3	19.5	 16
 44	  9	115.3	16.8	 16
 45	  9	118.5	11.9	 16
 46	  9	9373.5	802.2	 16
 47	  9	105.5	25.0	 16
 48	  9	108.5	14.8	 16
 49	  9	104.0	15.4	 16
 50	  9	7091.8	731.8	 16
 51	  9	114.3	15.3	 16
 52	  9	109.5	21.3	 16
 53	  9	73.5	12.3	 16
 54	  9	10089.3	749.4	 16
 55	  9	8992.5	638.4	 16
 56	  9	7911.3	615.3	 16
 57	  9	131.3	16.7	 16
 58	  9	98.8	13.8	 16
 59	  9	63.8	10.7	 16
 60	  9	67.5	11.9	 16
 61	  9	73.5	16.4	 16
 62	  9	9895.8	702.8	 16
 63	  9	139.0	27.2	 16
 64	  9	129.8	28.0	 16
 65	  9	120.3	17.8	 16
 66	  9	9976.0	1004.8	 16
 67	  9	97.8	23.0	 16
 68	  9	9285.8	783.1	 16
 69	  9	130.3	17.2	 16
 70	  9	105.8	16.2	 16
 71	  9	113.5	15.7	 16
 72	  9	8815.8	1079.2	 16
 73	  9	102.3	34.9	 16
 74	  9	108.0	15.3	 16
 75	  9	113.3	20.9	 16
 76	  9	110.0	12.2	 16
 77	  9	118.3	15.1	 16
 78	  9	104.5	18.6	 16
 79	  9	70.0	10.4	 16
 80	  9	8584.0	1154.1	 16
 81	  9	147.0	31.9	 16
 82	  9	116.8	19.9	 20
 83	  9	112.0	18.3	 16
 84	  9	8741.8	1108.0	 16
 85	  9	87.0	14.3	 16
 86	  9	116.0	110.3	 16
 87	  9	119.0	15.2	 16
 88	  9	7376.5	877.4	 16
 89	  9	141.8	44.0	 16
 90	  9	114.5	63.1	 16
 91	  9	72.3	13.2	 16
 92	  9	103.8	19.1	 16
 93	  9	121.5	40.5	 16
 94	  9	110.5	10.5	 16
 95	  9	7391.8	860.5	 16
 96	  9	124.0	24.7	 16
 97	  9	58.8	11.7	 16
 98	  9	116.5	20.9	 16
 99	  9	113.3	20.7	 16
100	  9	108.5	14.0	 16
101	  9	7027.0	860.0	 16
102	  9	113.3	18.8	 16
103	  9	67.0	12.5	 16
104	  9	7856.3	1017.6	 16
105	  9	134.5	15.3	 16
106	  9	111.3	17.8	 16
107	  9	128.3	21.3	 16
108	  9	7836.8	1106.9	 16
109	  9	74.0	15.0	 16
110	  9	63.0	10.7	 16
111	  9	251.8	31.8	 16
112	  9	805.8	91.6	 16
113	  9	274.0	31.2	 16
114	  9	178.8	25.6	 16
115	  9	70.5	9.6	 16
116	  9	77.5	14.5	 16
117	  9	69.0	19.9	 16
118	  9	76.0	11.6	 16
119	  9	87.5	14.1	 16
120	  9	110.3	16.9	 16
121	  9	86.5	11.0	 16
122	  9	68.3	8.9	 16
123	  9	107.8	18.0	 16
124	  9	213.0	51.2	 16
125	  9	73.8	12.5	 16
126	  9	74.5	13.9	 16
127	  9	169.3	32.3	 16
128	  9	61.3	9.9	 16
129	  9	92.3	17.7	 16
130	  9	83.0	12.2	 16
131	  9	119.0	18.1	 16
132	  9	179.3	19.5	 16
133	  9	90.3	12.7	 16
134	  9	279.8	48.8	 16
135	  9	60.8	12.2	 16
136	  9	77.8	11.9	 16
137	  9	84.5	15.7	 16
138	  9	61.0	12.6	 16
139	  9	67.0	14.3	 16
140	  9	60.3	10.7	 16
141	  9	129.3	26.2	 16
142	  9	109.8	16.4	 16
143	  9	441.8	58.8	 16
144	  9	89.5	14.2	 16
145	  9	88.8	21.8	 16
146	  9	108.5	122.8	 16
147	  9	71.3	11.8	 16
148	  9	83.0	10.1	 16
149	  9	83.5	21.8	 16
150	  9	173.8	20.7	 16
151	  9	74.3	12.1	 16
152	  9	4272.0	776.6	 16
153	  9	408.0	94.7	 16
154	  9	156.8	19.0	 16
155	  9	599.3	111.4	 16
156	  9	185.8	19.8	 16
157	  9	372.3	53.1	 16
158	  9	138.3	18.1	 16
159	  9	240.3	39.3	 16
160	  9	512.0	37.9	 16
161	  9	69.5	14.9	 16
162	  9	83.0	26.5	 16
163	  9	85.0	16.3	 16
164	  9	100.5	19.2	 16
165	  9	219.8	36.4	 16
166	  9	82.0	15.8	 16
167	  9	79.0	13.1	 16
168	  9	91.5	16.4	 16
169	  9	399.0	55.9	 16
170	  9	1091.5	197.3	 16
171	  9	74.3	11.9	 16
172	  9	117.0	13.6	 16
173	  9	118.5	18.0	 16
174	  9	178.8	20.3	 16
175	  9	176.5	19.8	 16
176	  9	75.0	12.3	 16
177	  9	63.5	11.0	 16
178	  9	59.8	8.9	 16
179	  9	68.3	12.7	 16
180	  9	62.0	10.2	 16
181	  9	69.0	16.9	 16
182	  9	59.3	9.9	 16
183	  9	63.5	8.2	 16
184	  9	61.5	9.3	 16
185	  9	62.5	13.9	 16
186	  9	75.0	12.3	 16
187	  9	62.8	11.8	 16
188	  9	66.5	12.0	 16
189	  9	61.5	12.0	 16
190	  9	69.0	17.3	 16
191	  9	193.0	26.7	 16
192	  9	132.0	19.2	 16
193	  9	81.8	44.9	 16
194	  9	66.8	13.9	 16
195	  9	91.8	13.8	 16
196	  9	70.5	8.8	 16
197	  9	73.5	23.2	 16
198	  9	93.5	23.8	 16
199	  9	124.3	65.5	 16
200	  9	80.0	19.9	 16
201	  9	960.5	127.7	 16
202	  9	71.0	15.8	 16
203	  9	56.3	10.3	 16
204	  9	86.8	15.4	 16
205	  9	152.3	20.4	 16
206	  9	181.8	27.8	 16
207	  9	64.8	12.3	 16
208	  9	104.3	17.3	 16
209	  9	60.3	12.0	 16
210	  9	154.0	22.9	 16
211	  9	90.5	19.3	 16
212	  9	335.5	70.2	 16
213	  9	143.5	16.3	 16
214	  9	139.0	17.7	 16
215	  9	103.0	11.6	 16
216	  9	80.0	12.4	 16
217	  9	73.3	11.0	 16
218	  9	57.8	12.5	 16
219	  9	72.5	12.7	 16
220	  9	117.5	19.2	 16
221	  9	100.3	17.2	 16
222	  9	96.0	12.3	 16
223	  9	164.8	31.9	 16
224	  9	109.8	20.2	 20
225	  9	122.3	21.7	 16
226	  9	64.5	16.9	 16
227	  9	77.3	12.5	 16
228	  9	67.5	15.1	 16
229	  9	106.3	15.5	 16
230	  9	94.8	10.3	 16
231	  9	432.3	85.2	 16
232	  9	89.8	15.5	 16
233	  9	269.3	47.8	 16
234	  9	75.3	15.2	 16
235	  9	250.8	36.8	 16
236	  9	140.5	27.7	 16
237	  9	141.3	28.1	 16
238	  9	423.5	72.8	 16
239	  9	105.0	14.4	 16
240	  9	152.8	24.4	 16
241	  9	89.3	17.4	 16
242	  9	64.5	11.9	 16
243	  9	65.3	16.9	 16
244	  9	67.5	10.8	 16
245	  9	88.5	17.0	 16
246	  9	65.3	10.5	 16
247	  9	1685.3	229.4	 16
248	  9	66.3	14.1	 16
249	  9	69.3	14.8	 16
250	  9	72.3	25.5	 16
251	  9	119.8	18.9	 16
252	  9	157.3	26.8	 16
253	  9	213.5	16.3	 16
254	  9	76.5	13.9	 16
255	  9	48.8	9.0	 16
256	  9	70.8	13.2	 16
257	  9	86.8	17.4	 16
258	  9	390.3	52.1	 16
259	  9	121.8	19.5	 16
260	  9	127.5	18.4	 16
261	  9	136.0	20.2	 16
262	  9	123.8	15.8	 16
263	  9	70.0	12.3	 16
264	  9	153.3	85.1	 16
265	  9	55.3	7.8	 16
266	  9	172.8	27.7	 16
267	  9	148.3	22.7	 16
268	  9	80.3	13.1	 16
269	  9	176.3	17.5	 16
270	  9	61.3	12.9	 16
271	  9	62.0	7.1	 16
272	  9	66.0	12.2	 16
273	  9	67.0	11.8	 16
274	  9	71.0	11.9	 16
275	  9	69.0	14.7	 16
276	  9	59.0	9.2	 16
277	  9	83.8	17.6	 16
278	  9	87.3	13.8	 16
279	  9	149.5	29.1	 16
280	  9	78.0	13.4	 16
281	  9	101.0	19.6	 16
282	  9	162.3	33.4	 16
283	  9	64.8	9.4	 16
284	  9	64.0	12.2	 16
285	  9	67.5	10.0	 16
286	  9	85.0	23.2	 16
287	  9	61.0	10.0	 16
288	  9	71.5	12.2	 16
289	  9	112.8	16.1	 12
290	  9	124.0	14.7	 16
291	  9	150.5	27.5	 16
292	  9	198.8	30.4	 16
293	  9	95.0	13.9	 16
294	  9	707.0	67.2	 16
295	  9	448.0	200.7	 16
296	  9	119.0	20.1	 16
297	  9	297.5	37.2	 16
298	  9	86.0	15.1	 16
299	  9	128.0	22.2	 16
300	  9	107.3	28.9	 16
301	  9	85.0	13.2	 16
302	  9	70.0	11.5	 16
303	  9	67.8	13.9	 16
304	  9	95.3	19.1	 16
305	  9	453.5	47.0	 16
306	  9	126.8	25.2	 16
307	  9	130.0	14.4	 16
308	  9	246.3	34.0	 16
309	  9	145.8	22.9	 16
310	  9	330.8	23.0	 16
311	  9	351.5	26.3	 16
312	  9	102.8	61.3	 16
313	  9	149.0	39.0	 16
314	  9	119.8	15.2	 16
315	  9	101.3	18.3	 16
316	  9	152.0	20.7	 16
317	  9	300.0	41.9	 16
318	  9	68.3	10.0	 16
319	  9	56.5	9.5	 16
320	  9	135.0	26.3	 16
321	  9	99.3	23.1	 16
322	  9	153.0	15.7	 16
323	  9	65.3	15.6	 16
324	  9	67.0	14.1	 16
325	  9	68.3	8.7	 16
326	  9	77.5	23.1	 16
327	  9	66.5	13.2	 16
328	  9	317.0	43.5	 16
329	  9	138.8	22.7	 16
330	  9	108.3	17.9	 16
331	  9	109.0	18.9	 16
332	  9	297.8	25.5	 16
333	  9	236.0	29.1	 16
334	  9	104.8	13.8	 16
335	  9	53.3	9.4	 16
336	  9	63.5	13.8	 16
337	  9	72.8	13.7	 16
338	  9	80.0	13.2	 16
339	  9	121.3	16.2	 16
340	  9	79.3	18.9	 16
341	  9	70.8	24.4	 16
342	  9	145.5	22.5	 16
343	  9	119.0	18.8	 16
344	  9	443.0	68.7	 16
345	  9	77.0	21.6	 16
346	  9	657.5	93.9	 16
347	  9	106.8	17.8	 16
348	  9	693.5	68.3	 16
349	  9	100.0	15.5	 16
350	  9	588.5	104.0	 16
351	  9	98.0	17.3	 16
352	  9	154.3	25.6	 16
353	  9	109.3	54.0	 16
354	  9	103.5	18.0	 16
355	  9	145.5	32.5	 16
356	  9	237.5	37.3	 16
357	  9	100.8	15.6	 16
358	  9	145.8	43.8	 16
359	  9	126.3	27.3	 16
360	  9	79.0	21.0	 16
361	  9	126.3	19.4	 16
362	  9	76.5	17.0	 16
363	  9	142.5	24.3	 16
364	  9	61.3	13.5	 16
365	  9	70.8	14.3	 16
366	  9	59.5	11.6	 16
367	  9	61.3	9.9	 20
368	  9	70.3	12.1	 16
369	  9	89.3	12.0	 16
370	  9	118.3	23.4	 16
371	  9	169.5	19.1	 16
372	  9	98.8	19.2	 16
373	  9	104.5	40.1	 16
374	  9	57.5	7.4	 16
375	  9	81.8	14.0	 16
376	  9	105.0	18.4	 16
377	  9	465.5	41.0	 16
378	  9	2011.8	341.7	 16
379	  9	93.0	15.8	 16
380	  9	61.5	11.7	 16
381	  9	79.0	12.7	 16
382	  9	110.8	16.5	 16
383	  9	186.8	19.7	 16
384	  9	297.3	30.2	 16
385	  9	308.0	42.2	 16
386	  9	143.3	14.9	 16
387	  9	631.3	49.8	 16
388	  9	164.0	45.4	 16
389	  9	69.5	11.0	 16
390	  9	74.5	11.7	 16
391	  9	122.3	14.2	 16
392	  9	98.3	21.9	 16
393	  9	63.3	14.9	 16
394	  9	920.0	163.2	 16
395	  9	114.3	30.3	 16
396	  9	60.8	10.1	 16
397	  9	59.3	12.0	 16
398	  9	74.3	12.1	 16
399	  9	57.8	12.4	 16
400	  9	60.3	9.2	 16
401	  9	62.5	9.0	 16
402	  9	63.0	13.9	 16
403	  9	81.3	17.8	 16
404	  9	74.8	15.1	 16
405	  9	103.3	16.5	 16
406	  9	67.3	14.8	 16
407	  9	93.8	13.3	 16
408	  9	75.0	15.2	 16
409	  9	92.3	12.0	 16
410	  9	65.5	15.9	 16
411	  9	135.0	21.0	 16
412	  9	107.5	23.1	 16
413	  9	93.0	15.9	 16
414	  9	105.3	19.5	 16
415	  9	116.8	19.5	 16
416	  9	84.0	18.5	 16
417	  9	86.0	16.2	 16
418	  9	56.8	10.2	 16
419	  9	127.0	23.5	 16
420	  9	321.3	72.0	 16
421	  9	85.0	19.0	 16
422	  9	56.8	11.6	 16
423	  9	232.3	23.0	 16
424	  9	151.5	26.0	 16
425	  9	72.3	16.5	 16
426	  9	69.0	14.1	 16
427	  9	95.8	18.1	 16
428	  9	71.5	16.4	 16
429	  9	70.3	16.0	 16
430	  9	70.8	10.5	 16
431	  9	58.3	10.8	 16
432	  9	54.5	13.4	 16
433	  9	252.3	29.4	 16
434	  9	68.3	14.8	 16
435	  9	59.0	9.5	 16
436	  9	73.3	22.2	 16
437	  9	60.0	13.3	 16
438	  9	350.8	54.7	 16
439	  9	87.3	14.7	 16
440	  9	126.3	18.5	 16
441	  9	96.5	15.3	 16
442	  9	384.3	50.5	 16
443	  9	220.0	24.6	 16
444	  9	192.0	27.4	 16
445	  9	79.3	28.5	 16
446	  9	83.5	12.3	 16
447	  9	70.0	10.0	 16
448	  9	72.8	10.5	 16
449	  9	64.5	72.6	 16
450	  9	123.5	19.5	 16
451	  9	185.3	29.4	 16
452	  9	64.5	8.7	 16
453	  9	123.0	15.0	 16
454	  9	734.8	82.1	 16
455	  9	138.0	20.3	 16
456	  9	93.3	17.1	 16
457	  9	65.3	13.9	 16
458	  9	68.0	17.7	 16
459	  9	66.0	13.8	 16
460	  9	274.8	47.0	 16
461	  9	64.0	14.8	 16
462	  9	66.0	11.2	 16
463	  9	85.5	18.0	 16
464	  9	75.3	12.8	 16
465	  9	92.0	20.9	 16
466	  9	133.8	18.4	 16
467	  9	57.8	13.5	 16
468	  9	66.0	11.0	 16
469	  9	71.5	11.4	 16
470	  9	68.5	10.5	 16
471	  9	70.8	12.6	 16
472	  9	99.5	10.4	 16
473	  9	95.3	13.1	 16
474	  9	108.0	16.7	 16
475	  9	74.0	10.7	 16
476	  9	61.5	12.2	 16
477	  9	69.3	13.9	 16
478	  9	75.0	10.3	 16
479	  9	62.5	12.4	 16
480	  9	78.3	23.8	 16
481	  9	57.5	9.1	 16
482	  9	62.5	12.1	 16
483	  9	90.8	52.7	 16
484	  9	208.0	29.5	 16
485	  9	73.3	13.8	 16
486	  9	346.8	59.4	 16
487	  9	161.0	30.6	 16
488	  9	100.0	16.5	 16
489	  9	61.0	13.7	 16
490	  9	73.3	11.2	 16
491	  9	71.3	14.3	 16
492	  9	113.0	16.5	 16
493	  9	195.0	29.1	 16
494	  9	332.0	28.3	 16
495	  9	165.3	23.5	 16
496	  9	141.3	25.0	 16
497	  9	380.3	40.7	 16
498	  9	125.0	19.7	 16
499	  9	115.3	23.3	 16
500	  9	78.3	14.7	 16
501	  9	71.3	12.4	 16
502	  9	70.8	13.3	 16
503	  9	94.0	16.2	 16
504	  9	106.3	15.7	 16
505	  9	160.8	24.4	 16
506	  9	368.0	57.0	 16
507	  9	132.5	25.3	 16
508	  9	293.8	70.3	 16
509	  9	77.3	27.5	 20
510	  9	156.0	37.4	 16
511	  9	75.3	10.8	 16
512	  9	57.8	9.8	 16
513	  9	79.8	48.2	 16
514	  9	130.5	16.5	 16
515	  9	54.3	12.0	 16
516	  9	61.3	14.3	 16
517	  9	59.3	12.9	 16
518	  9	56.0	11.7	 16
519	  9	82.0	18.7	 16
520	  9	110.0	20.4	 16
521	  9	71.0	91.3	 16
522	  9	79.0	18.9	 16
523	  9	64.0	11.4	 16
524	  9	78.5	40.8	 16
525	  9	75.8	13.5	 16
526	  9	137.5	19.3	 16
527	  9	108.0	12.4	 16
528	  9	79.8	9.4	 16
529	  9	71.3	9.4	 16
530	  9	112.8	16.0	 16
531	  9	70.8	13.7	 16
532	  9	62.3	12.5	 16
533	  9	61.5	14.8	 16
534	  9	63.3	9.6	 16
535	  9	100.8	15.3	 16
536	  9	76.0	12.8	 16
537	  9	94.0	14.4	 16
538	  9	73.3	15.4	 16
539	  9	85.3	14.9	 16
540	  9	217.3	31.0	 16
541	  9	84.8	14.4	 16
542	  9	61.0	9.2	 16
543	  9	78.5	15.0	 16
544	  9	73.3	13.5	 16
545	  9	150.3	19.5	 16
546	  9	119.3	18.8	 16
547	  9	137.3	21.6	 16
548	  9	129.8	18.6	 16
549	  9	96.3	11.7	 16
550	  9	120.0	19.1	 16
551	  9	207.3	14.2	 16
552	  9	146.8	28.9	 16
553	  9	135.0	22.3	 16
554	  9	93.8	16.7	 16
555	  9	58.0	12.4	 16
556	  9	85.0	9.6	 16
557	  9	68.3	15.4	 16
558	  9	64.3	12.4	 16
559	  9	90.0	38.5	 16
560	  9	73.0	16.2	 16
561	  9	217.8	32.3	 16
562	  9	52.3	12.1	 16
563	  9	99.0	16.8	 16
564	  9	142.5	45.9	 16
565	  9	158.3	24.9	 16
566	  9	399.5	64.1	 16
567	  9	75.8	15.9	 16
568	  9	56.0	12.0	 16
569	  9	65.0	11.8	 16
570	  9	217.0	36.6	 16
571	  9	453.0	56.7	 16
572	  9	152.5	19.1	 16
573	  9	102.3	16.1	 16
574	  9	189.8	28.3	 16
575	  9	157.8	18.7	 16
576	  9	151.0	20.7	 16
577	  9	103.0	11.7	 16
578	  9	68.3	12.6	 16
579	  9	70.3	9.6	 16
580	  9	85.3	15.3	 16
581	  9	261.8	55.3	 16
582	  9	203.8	23.8	 16
583	  9	99.3	18.6	 16
584	  9	94.0	18.2	 16
585	  9	158.8	19.0	 16
586	  9	101.0	16.8	 16
587	  9	67.3	12.7	 16
588	  9	87.3	14.4	 16
589	  9	90.3	17.6	 16
590	  9	80.5	12.4	 16
591	  9	129.8	22.8	 16
592	  9	52.0	13.6	 16
593	  9	98.5	14.4	 16
594	  9	74.5	14.2	 16
595	  9	102.0	13.2	 16
596	  9	345.8	88.3	 16
597	  9	379.3	45.1	 16
598	  9	202.5	40.0	 16
599	  9	104.3	16.5	 16
600	  9	128.5	31.9	 16
601	  9	84.8	13.2	 16
602	  9	78.0	15.8	 16
603	  9	153.5	20.7	 16
604	  9	90.0	16.6	 16
605	  9	62.3	11.7	 16
606	  9	167.0	29.2	 16
607	  9	62.3	13.2	 16
608	  9	64.5	17.1	 16
609	  9	74.3	12.7	 16
610	  9	98.3	11.3	 16
611	  9	88.8	19.4	 16
612	  9	90.3	16.4	 16
613	  9	858.0	141.3	 16
614	  9	98.3	20.9	 16
615	  9	92.8	12.5	 16
616	  9	104.0	19.4	 16
617	  9	334.5	35.0	 16
618	  9	137.0	27.7	 16
619	  9	68.5	12.6	 16
620	  9	113.3	16.3	 16
621	  9	81.0	13.3	 16
622	  9	70.8	14.3	 16
623	  9	93.0	16.0	 16
624	  9	82.3	13.0	 16
625	  9	82.0	7.9	 16
626	  9	58.0	10.1	 16
627	  9	92.5	18.0	 16
628	  9	84.5	14.4	 16
629	  9	82.5	14.0	 16
630	  9	152.3	18.6	 16
631	  9	138.5	24.5	 16
632	  9	439.0	92.7	 16
633	  9	70.3	9.2	 16
634	  9	370.5	72.2	 16
635	  9	725.5	153.0	 16
636	  9	160.8	40.1	 16
637	  9	69.0	7.1	 16
638	  9	60.5	9.6	 16
639	  9	61.0	9.3	 16
640	  9	75.8	66.7	 16
641	  9	417.5	63.2	 16
642	  9	57.3	11.6	 16
643	  9	73.3	13.2	 16
644	  9	65.8	11.6	 16
645	  9	79.3	30.1	 16
646	  9	120.8	26.9	 16
647	  9	103.3	13.3	 16
648	  9	431.3	85.1	 16
649	  9	70.0	16.2	 16
650	  9	57.0	8.0	 16
651	  9	104.8	110.6	 16
652	  9	146.5	30.4	 20
653	  9	317.5	43.4	 16
654	  9	131.0	27.1	 16
655	  9	168.3	36.5	 16
656	  9	61.3	12.6	 16
657	  9	174.3	30.0	 16
658	  9	136.8	14.0	 16
659	  9	116.0	18.2	 16
660	  9	107.5	17.3	 16
661	  9	98.5	14.4	 16
662	  9	59.3	12.3	 16
663	  9	158.5	17.1	 16
664	  9	400.5	53.7	 16
665	  9	84.8	31.8	 16
666	  9	105.5	20.5	 16
667	  9	326.3	217.0	 16
668	  9	296.8	37.3	 16
669	  9	190.8	15.8	 16
670	  9	105.0	14.8	 16
671	  9	300.8	40.8	 16
672	  9	221.3	28.4	 16
673	  9	133.0	23.6	 16
674	  9	127.5	25.7	 16
675	  9	72.5	11.3	 16
676	  9	87.0	13.2	 16
677	  9	120.3	22.0	 16
678	  9	100.3	14.9	 16
679	  9	87.5	12.9	 16
680	  9	283.8	36.0	 16
681	  9	3579.0	689.1	 16
682	  9	3960.8	624.5	 16
683	  9	4272.5	676.7	 16
684	  9	4055.5	693.4	 16
685	  9	198.3	32.9	 16
686	  9	176.5	62.8	 16
687	  9	74.8	13.5	 16
688	  9	60.3	9.9	 16
689	  9	75.0	14.1	 16
690	  9	66.0	11.4	 16
691	  9	183.5	31.2	 16
692	  9	69.3	11.5	 16
693	  9	101.8	20.7	 16
694	  9	116.0	16.5	 16
695	  9	87.5	14.8	 16
696	  9	113.3	23.5	 16
697	  9	157.5	19.9	 16
698	  9	392.5	45.2	 16
699	  9	158.5	25.2	 16
700	  9	261.3	30.7	 16
701	  9	71.3	11.9	 16
702	  9	70.8	13.9	 16
703	  9	69.8	11.7	 16
704	  9	73.5	10.9	 16
705	  9	112.0	21.2	 16
706	  9	106.8	20.7	 16
707	  9	148.3	29.8	 16
708	  9	371.5	37.0	 16
709	  9	319.8	33.5	 16
710	  9	380.3	37.6	 16
711	  9	132.0	26.8	 16
  0	 10	7669.5	822.2	 16
  1	 10	79.3	11.3	 16
  2	 10	86.0	15.0	 16
  3	 10	72.0	8.5	 16
  4	 10	63.5	12.5	 16
  5	 10	71.5	10.9	 16
  6	 10	112.8	17.2	 16
  7	 10	70.0	14.2	 16
  8	 10	74.5	13.9	 16
  9	 10	84.0	16.0	 16
 10	 10	130.5	21.2	 16
 11	 10	62.5	8.6	 16
 12	 10	8933.8	803.3	 16
 13	 10	122.3	16.9	 16
 14	 10	115.8	22.0	 16
 15	 10	137.0	18.9	 16
 16	 10	9961.8	810.1	 16
 17	 10	84.5	9.7	 16
 18	 10	10179.5	928.0	 16
 19	 10	138.8	17.5	 16
 20	 10	139.3	20.3	 16
 21	 10	141.5	78.4	 16
 22	 10	117.8	18.9	 16
 23	 10	74.0	13.8	 16
 24	 10	9907.0	619.2	 16
 25	 10	134.3	23.0	 16
 26	 10	105.8	12.8	 16
 27	 10	125.5	19.7	 16
 28	 10	10309.0	733.8	 16
 29	 10	96.8	20.9	 16
 30	 10	9628.0	1551.0	 16
 31	 10	132.0	20.6	 16
 32	 10	128.8	18.5	 16
 33	 10	140.5	22.4	 16
 34	 10	99.8	15.0	 16
 35	 10	69.8	14.4	 16
 36	 10	8916.3	1112.8	 16
 37	 10	128.3	25.3	 16
 38	 10	110.5	17.1	 16
 39	 10	128.0	19.4	 16
 40	 10	7883.5	926.5	 16
 41	 10	82.0	17.1	 16
 42	 10	9928.3	647.2	 16
 43	 10	134.8	21.3	 16
 44	 10	108.0	16.6	 16
 45	 10	110.3	19.3	 16
 46	 10	9432.5	773.8	 16
 47	 10	88.5	16.2	 16
 48	 10	116.0	21.8	 16
 49	 10	104.8	12.8	 16
 50	 10	7790.0	578.7	 16
 51	 10	123.0	15.1	 16
 52	 10	110.0	16.9	 16
 53	 10	63.0	11.8	 16
 54	 10	9964.5	681.5	 16
 55	 10	140.0	29.3	 16
 56	 10	107.5	12.4	 16
 57	 10	102.0	15.9	 16
 58	 10	106.5	23.0	 16
 59	 10	53.8	12.2	 16
 60	 10	57.3	14.6	 16
 61	 10	61.3	9.1	 16
 62	 10	9921.8	708.6	 16
 63	 10	129.0	23.6	 16
 64	 10	99.8	22.2	 16
 65	 10	107.0	16.5	 16
 66	 10	9714.3	933.0	 16
 67	 10	96.0	21.3	 16
 68	 10	8500.5	1575.9	 16
 69	 10	139.0	27.0	 16
 70	 10	125.0	19.4	 16
 71	 10	100.3	13.8	 16
 72	 10	8735.3	1634.9	 16
 73	 10	93.0	24.2	 16
 74	 10	91.0	14.3	 16
 75	 10	94.8	11.8	 16
 76	 10	93.3	11.6	 16
 77	 10	101.3	19.3	 16
 78	 10	93.5	17.4	 16
 79	 10	60.3	10.6	 16
 80	 10	8206.0	1347.1	 16
 81	 10	132.5	18.8	 16
 82	 10	108.3	18.4	 16
 83	 10	109.3	18.8	 20
 84	 10	8339.3	1237.1	 16
 85	 10	69.0	13.5	 16
 86	 10	101.0	19.5	 16
 87	 10	125.3	17.9	 16
 88	 10	7417.0	931.8	 16
 89	 10	111.5	16.9	 16
 90	 10	112.0	23.1	 16
 91	 10	69.8	12.7	 16
 92	 10	7089.3	928.9	 16
 93	 10	109.5	15.4	 16
 94	 10	106.5	12.0	 16
 95	 10	7328.8	715.8	 16
 96	 10	105.0	18.6	 16
 97	 10	56.3	13.3	 16
 98	 10	6886.3	799.0	 16
 99	 10	96.0	12.1	 16
100	 10	111.3	17.4	 16
101	 10	7063.5	579.6	 16
102	 10	109.0	11.5	 16
103	 10	62.8	9.3	 16
104	 10	8175.8	794.7	 16
105	 10	111.0	18.3	 16
106	 10	85.0	13.5	 16
107	 10	91.8	13.3	 16
108	 10	8714.0	709.5	 16
109	 10	79.8	19.2	 16
110	 10	52.3	9.4	 16
111	 10	123.5	163.9	 16
112	 10	287.0	50.0	 16
113	 10	143.5	25.2	 16
114	 10	212.8	25.0	 16
115	 10	79.3	18.7	 16
116	 10	68.8	10.7	 16
117	 10	62.0	8.0	 16
118	 10	71.8	15.1	 16
119	 10	76.5	25.8	 16
120	 10	71.3	15.4	 16
121	 10	77.5	20.7	 16
122	 10	94.5	42.3	 16
123	 10	92.3	17.9	 16
124	 10	104.0	17.6	 16
125	 10	78.3	13.3	 16
126	 10	66.3	10.3	 16
127	 10	68.8	11.4	 16
128	 10	62.8	12.6	 16
129	 10	65.0	11.4	 16
130	 10	74.3	13.5	 16
131	 10	95.0	11.1	 16
132	 10	87.5	18.0	 16
133	 10	69.8	13.6	 16
134	 10	63.3	13.3	 16
135	 10	57.8	12.3	 16
136	 10	75.8	31.5	 16
137	 10	66.3	17.5	 16
138	 10	62.8	12.4	 16
139	 10	60.0	12.4	 16
140	 10	63.3	10.5	 16
141	 10	70.8	9.7	 16
142	 10	88.3	19.6	 16
143	 10	202.8	30.8	 16
144	 10	127.3	23.1	 16
145	 10	79.5	13.9	 16
146	 10	78.5	15.2	 16
147	 10	57.3	7.6	 16
148	 10	77.5	15.2	 16
149	 10	59.8	12.3	 16
150	 10	89.0	14.9	 16
151	 10	61.0	11.9	 16
152	 10	953.8	92.6	 16
153	 10	75.5	15.7	 16
154	 10	196.8	27.5	 16
155	 10	214.3	37.7	 16
156	 10	78.5	17.9	 16
157	 10	230.0	27.2	 16
158	 10	121.3	23.4	 16
159	 10	176.0	18.8	 16
160	 10	501.0	65.7	 16
161	 10	61.8	9.0	 16
162	 10	52.0	11.5	 16
163	 10	101.3	21.3	 16
164	 10	95.0	18.4	 16
165	 10	137.0	27.0	 16
166	 10	74.3	14.0	 16
167	 10	69.8	15.0	 16
168	 10	101.5	59.9	 16
169	 10	432.5	78.1	 16
170	 10	269.0	51.1	 16
171	 10	71.5	10.0	 16
172	 10	109.5	22.1	 16
173	 10	97.0	18.0	 16
174	 10	79.8	18.8	 16
175	 10	156.8	21.8	 16
176	 10	67.0	17.5	 16
177	 10	77.5	20.2	 16
178	 10	63.3	12.9	 16
179	 10	59.0	12.2	 16
180	 10	65.8	12.9	 16
181	 10	73.5	12.1	 16
182	 10	65.3	11.6	 16
183	 10	62.5	10.9	 16
184	 10	78.0	53.2	 16
185	 10	63.5	12.5	 16
186	 10	77.8	14.0	 16
187	 10	63.5	11.3	 16
188	 10	64.0	11.1	 16
189	 10	66.8	14.3	 16
190	 10	68.0	18.1	 16
191	 10	134.8	21.2	 16
192	 10	90.3	14.9	 16
193	 10	65.3	10.4	 16
194	 10	59.3	7.5	 16
195	 10	57.3	10.0	 16
196	 10	69.5	12.9	 16
197	 10	71.0	10.4	 16
198	 10	66.3	11.4	 16
199	 10	99.5	15.2	 16
200	 10	62.3	10.6	 16
201	 10	290.3	67.9	 16
202	 10	73.0	16.6	 16
203	 10	60.5	10.7	 16
204	 10	79.8	13.5	 16
205	 10	114.0	19.2	 16
206	 10	122.5	18.7	 16
207	 10	73.5	21.7	 16
208	 10	99.3	11.5	 16
209	 10	56.5	10.0	 16
210	 10	143.3	23.6	 16
211	 10	83.3	13.8	 16
212	 10	223.3	40.6	 16
213	 10	140.5	26.6	 16
214	 10	182.5	39.5	 16
215	 10	91.3	14.5	 16
216	 10	82.8	16.1	 16
217	 10	84.0	22.3	 16
218	 10	70.3	17.6	 16
219	 10	68.8	15.4	 16
220	 10	92.0	16.5	 16
221	 10	110.0	15.6	 16
222	 10	96.8	172.2	 16
223	 10	109.0	22.9	 16
224	 10	116.3	20.2	 16
225	 10	79.8	22.2	 16
226	 10	74.5	17.6	 20
227	 10	66.5	14.1	 16
228	 10	75.8	17.2	 16
229	 10	87.0	16.5	 16
230	 10	89.8	20.6	 16
231	 10	100.8	16.0	 16
232	 10	141.0	108.6	 16
233	 10	123.5	16.2	 16
234	 10	74.0	11.5	 16
235	 10	115.0	13.6	 16
236	 10	94.5	20.5	 16
237	 10	73.3	17.4	 16
238	 10	81.0	15.3	 16
239	 10	105.5	19.5	 16
240	 10	79.3	14.4	 16
241	 10	94.0	19.4	 16
242	 10	61.3	8.9	 16
243	 10	70.0	11.6	 16
244	 10	65.5	11.1	 16
245	 10	97.5	19.5	 16
246	 10	54.0	13.2	 16
247	 10	188.8	32.9	 16
248	 10	63.3	24.3	 16
249	 10	69.0	9.8	 16
250	 10	79.0	11.7	 16
251	 10	102.5	74.4	 16
252	 10	87.3	15.3	 16
253	 10	193.0	22.4	 16
254	 10	77.0	17.3	 16
255	 10	68.5	74.0	 16
256	 10	89.0	14.7	 16
257	 10	84.0	18.1	 16
258	 10	210.8	30.9	 16
259	 10	102.3	16.1	 16
260	 10	143.5	29.3	 16
261	 10	136.3	18.3	 16
262	 10	63.0	13.5	 16
263	 10	76.0	11.5	 16
264	 10	64.5	8.8	 16
265	 10	74.3	14.9	 16
266	 10	105.8	18.1	 16
267	 10	112.8	14.9	 16
268	 10	74.3	14.1	 16
269	 10	152.3	24.6	 16
270	 10	77.3	15.6	 16
271	 10	62.3	13.3	 16
272	 10	75.3	46.5	 16
273	 10	60.3	10.2	 16
274	 10	74.3	14.0	 16
275	 10	60.0	9.2	 16
276	 10	61.3	12.2	 16
277	 10	66.0	12.1	 16
278	 10	74.0	10.4	 16
279	 10	114.3	16.0	 16
280	 10	77.5	12.9	 16
281	 10	78.8	16.6	 16
282	 10	150.8	23.9	 16
283	 10	69.0	15.4	 16
284	 10	70.0	19.0	 16
285	 10	68.0	11.5	 16
286	 10	68.0	31.4	 16
287	 10	65.0	13.2	 16
288	 10	78.8	14.6	 16
289	 10	85.0	12.6	 16
290	 10	97.8	17.9	 16
291	 10	128.8	19.7	 16
292	 10	137.3	18.0	 16
293	 10	85.8	12.9	 16
294	 10	919.5	124.9	 16
295	 10	438.0	44.8	 16
296	 10	92.5	13.4	 16
297	 10	381.8	40.2	 16
298	 10	140.5	35.9	 16
299	 10	81.0	17.4	 16
300	 10	67.0	10.2	 16
301	 10	80.5	14.6	 16
302	 10	73.5	13.0	 16
303	 10	69.8	11.4	 16
304	 10	103.0	15.3	 16
305	 10	278.3	25.2	 16
306	 10	76.3	14.1	 16
307	 10	117.3	12.4	 16
308	 10	95.3	23.0	 16
309	 10	93.8	13.7	 16
310	 10	149.8	27.0	 16
311	 10	112.0	18.2	 16
312	 10	74.3	13.0	 16
313	 10	73.5	11.8	 16
314	 10	91.0	37.4	 16
315	 10	90.0	16.4	 16
316	 10	123.3	15.4	 16
317	 10	731.8	73.5	 16
318	 10	52.0	10.9	 16
319	 10	60.3	11.4	 16
320	 10	75.0	12.2	 16
321	 10	87.3	17.4	 16
322	 10	238.3	68.8	 16
323	 10	56.3	8.3	 16
324	 10	135.8	16.6	 16
325	 10	73.3	7.5	 16
326	 10	54.3	10.3	 16
327	 10	64.3	15.0	 16
328	 10	169.3	27.4	 16
329	 10	95.5	18.6	 16
330	 10	81.3	12.7	 16
331	 10	79.3	13.0	 16
332	 10	252.3	29.5	 16
333	 10	195.3	25.7	 16
334	 10	111.0	22.7	 16
335	 10	57.0	8.4	 16
336	 10	58.0	11.0	 16
337	 10	61.3	10.1	 16
338	 10	89.8	15.5	 16
339	 10	115.8	19.6	 16
340	 10	82.0	16.4	 16
341	 10	61.5	10.0	 16
342	 10	119.5	18.3	 16
343	 10	71.8	30.5	 16
344	 10	231.0	29.4	 16
345	 10	60.5	9.4	 16
346	 10	203.0	47.2	 16
347	 10	80.0	13.3	 16
348	 10	589.5	65.8	 16
349	 10	82.5	21.4	 16
350	 10	125.0	19.1	 16
351	 10	90.0	19.0	 16
352	 10	91.3	12.5	 16
353	 10	71.3	13.6	 16
354	 10	72.5	15.6	 16
355	 10	105.3	20.4	 16
356	 10	115.3	26.6	 16
357	 10	96.5	14.8	 16
358	 10	87.3	19.5	 16
359	 10	115.3	20.6	 16
360	 10	58.3	14.9	 16
361	 10	99.5	23.5	 16
362	 10	75.5	13.2	 16
363	 10	86.5	18.8	 16
364	 10	57.3	11.2	 16
365	 10	56.5	9.8	 16
366	 10	51.8	9.5	 16
367	 10	62.0	11.7	 16
368	 10	67.3	13.9	 20
369	 10	92.8	15.8	 16
370	 10	112.5	21.2	 16
371	 10	87.0	14.9	 16
372	 10	62.0	8.4	 16
373	 10	53.8	9.2	 16
374	 10	61.3	10.9	 16
375	 10	72.8	13.9	 16
376	 10	71.0	9.8	 16
377	 10	209.3	26.7	 16
378	 10	316.0	78.8	 16
379	 10	78.0	11.7	 16
380	 10	71.8	50.8	 16
381	 10	62.8	13.2	 16
382	 10	81.0	10.8	 16
383	 10	181.8	32.4	 16
384	 10	122.5	21.0	 16
385	 10	108.3	18.4	 16
386	 10	157.5	17.0	 16
387	 10	157.8	25.2	 16
388	 10	62.5	11.2	 16
389	 10	68.8	13.9	 16
390	 10	77.5	14.1	 16
391	 10	125.8	29.0	 16
392	 10	69.0	19.0	 16
393	 10	68.0	45.1	 16
394	 10	322.5	39.4	 16
395	 10	146.0	23.1	 16
396	 10	56.5	9.9	 16
397	 10	67.8	12.8	 16
398	 10	68.3	15.5	 16
399	 10	61.8	10.9	 16
400	 10	63.3	16.1	 16
401	 10	69.3	12.6	 16
402	 10	67.0	13.0	 16
403	 10	61.8	10.0	 16
404	 10	86.3	12.1	 16
405	 10	107.3	19.0	 16
406	 10	67.8	11.9	 16
407	 10	63.5	11.2	 16
408	 10	70.0	13.1	 16
409	 10	102.3	20.1	 16
410	 10	52.0	9.4	 16
411	 10	242.0	26.6	 16
412	 10	94.5	13.8	 16
413	 10	90.8	14.5	 16
414	 10	108.8	21.7	 16
415	 10	78.3	16.3	 16
416	 10	100.3	18.2	 16
417	 10	61.0	12.9	 16
418	 10	47.3	8.5	 16
419	 10	71.5	13.8	 16
420	 10	153.8	16.6	 16
421	 10	70.8	13.6	 16
422	 10	51.0	9.4	 16
423	 10	72.0	10.9	 16
424	 10	73.5	15.2	 16
425	 10	56.3	14.1	 16
426	 10	55.3	8.6	 16
427	 10	57.5	9.4	 16
428	 10	80.5	25.5	 16
429	 10	64.8	15.5	 16
430	 10	54.3	8.1	 16
431	 10	55.8	11.8	 16
432	 10	56.0	12.2	 16
433	 10	61.5	12.1	 16
434	 10	59.0	17.6	 16
435	 10	56.5	9.9	 16
436	 10	62.3	10.0	 16
437	 10	51.8	9.7	 16
438	 10	196.3	34.0	 16
439	 10	74.3	10.5	 16
440	 10	76.3	15.1	 16
441	 10	79.3	9.9	 16
442	 10	102.8	20.5	 16
443	 10	124.3	23.1	 16
444	 10	71.3	11.3	 16
445	 10	69.3	9.6	 16
446	 10	73.0	15.7	 16
447	 10	54.3	10.7	 16
448	 10	61.5	15.1	 16
449	 10	60.5	10.3	 16
450	 10	139.0	30.2	 16
451	 10	94.8	21.1	 16
452	 10	91.0	13.4	 16
453	 10	110.3	13.7	 16
454	 10	567.3	72.7	 16
455	 10	104.3	17.1	 16
456	 10	87.8	12.8	 16
457	 10	58.0	9.7	 16
458	 10	77.8	13.9	 16
459	 10	71.3	12.5	 16
460	 10	240.3	28.7	 16
461	 10	61.3	10.9	 16
462	 10	56.3	9.6	 16
463	 10	71.5	14.0	 16
464	 10	59.5	12.9	 16
465	 10	91.0	70.3	 16
466	 10	185.0	30.1	 16
467	 10	62.0	10.2	 16
468	 10	67.8	30.1	 16
469	 10	66.3	14.0	 16
470	 10	62.0	7.8	 16
471	 10	69.3	9.7	 16
472	 10	106.3	12.5	 16
473	 10	90.3	16.2	 16
474	 10	76.3	12.7	 16
475	 10	75.3	20.5	 16
476	 10	56.3	10.7	 16
477	 10	58.8	9.5	 16
478	 10	68.3	12.0	 16
479	 10	65.3	9.0	 16
480	 10	63.5	15.9	 16
481	 10	61.3	12.3	 16
482	 10	55.8	7.7	 16
483	 10	45.5	10.4	 16
484	 10	99.8	16.0	 16
485	 10	75.5	17.0	 16
486	 10	104.3	18.8	 16
487	 10	69.0	13.4	 16
488	 10	73.3	15.2	 16
489	 10	58.5	12.4	 16
490	 10	64.3	11.2	 16
491	 10	58.3	10.3	 16
492	 10	79.5	14.5	 16
493	 10	222.3	31.1	 16
494	 10	338.8	41.4	 16
495	 10	197.3	25.3	 16
496	 10	200.0	26.2	 16
497	 10	336.5	26.1	 16
498	 10	179.5	21.7	 16
499	 10	153.5	29.0	 16
500	 10	76.0	17.1	 16
501	 10	70.3	12.2	 16
502	 10	71.5	9.9	 16
503	 10	97.3	17.9	 16
504	 10	86.5	16.8	 16
505	 10	88.3	25.2	 16
506	 10	511.8	61.3	 16
507	 10	76.5	11.5	 16
508	 10	120.8	23.3	 16
509	 10	53.5	7.4	 16
510	 10	95.5	14.3	 16
511	 10	74.3	15.4	 20
512	 10	64.0	12.5	 16
513	 10	58.0	11.5	 16
514	 10	76.5	18.6	 16
515	 10	54.3	7.6	 16
516	 10	61.0	12.4	 16
517	 10	72.3	17.1	 16
518	 10	50.3	9.6	 16
519	 10	74.5	9.9	 16
520	 10	72.3	15.6	 16
521	 10	71.8	12.1	 16
522	 10	85.8	14.5	 16
523	 10	52.8	8.6	 16
524	 10	68.3	17.3	 16
525	 10	96.3	13.7	 16
526	 10	89.3	12.8	 16
527	 10	105.3	14.9	 16
528	 10	73.0	13.0	 16
529	 10	80.3	15.3	 16
530	 10	133.5	19.3	 16
531	 10	52.5	8.1	 16
532	 10	54.5	10.6	 16
533	 10	65.0	13.2	 16
534	 10	48.0	6.9	 16
535	 10	90.3	14.5	 16
536	 10	74.3	10.8	 16
537	 10	93.3	18.2	 16
538	 10	79.5	16.8	 16
539	 10	70.0	12.9	 16
540	 10	76.5	12.0	 16
541	 10	67.5	10.4	 16
542	 10	57.5	13.7	 16
543	 10	93.8	42.4	 16
544	 10	79.5	12.1	 16
545	 10	73.8	18.8	 16
546	 10	152.0	24.9	 16
547	 10	267.3	38.7	 16
548	 10	72.5	8.7	 16
549	 10	88.5	8.8	 16
550	 10	77.0	10.6	 16
551	 10	305.0	32.2	 16
552	 10	176.8	22.2	 16
553	 10	138.5	22.2	 16
554	 10	71.5	15.6	 16
555	 10	57.8	12.8	 16
556	 10	74.3	10.5	 16
557	 10	93.0	14.3	 16
558	 10	62.0	11.6	 16
559	 10	76.5	15.0	 16
560	 10	57.0	11.9	 16
561	 10	145.5	14.1	 16
562	 10	68.8	11.7	 16
563	 10	86.3	18.6	 16
564	 10	103.3	18.5	 16
565	 10	100.5	15.3	 16
566	 10	121.0	21.8	 16
567	 10	65.3	11.8	 16
568	 10	49.3	8.8	 16
569	 10	118.5	21.5	 16
570	 10	145.0	17.2	 16
571	 10	231.0	27.9	 16
572	 10	192.3	26.9	 16
573	 10	101.0	18.6	 16
574	 10	153.0	23.0	 16
575	 10	167.3	22.6	 16
576	 10	129.5	18.1	 16
577	 10	81.0	10.4	 16
578	 10	64.3	12.3	 16
579	 10	62.3	13.6	 16
580	 10	87.3	8.6	 16
581	 10	84.3	19.3	 16
582	 10	93.0	14.5	 16
583	 10	66.3	10.4	 16
584	 10	66.8	12.0	 16
585	 10	77.0	11.5	 16
586	 10	75.0	13.3	 16
587	 10	57.0	9.8	 16
588	 10	69.0	8.8	 16
589	 10	68.8	12.7	 16
590	 10	65.5	10.9	 16
591	 10	83.8	17.6	 16
592	 10	54.8	8.8	 16
593	 10	85.0	14.3	 16
594	 10	80.0	13.7	 16
595	 10	117.0	15.6	 16
596	 10	103.5	22.6	 16
597	 10	100.8	14.7	 16
598	 10	103.5	18.2	 16
599	 10	128.3	16.4	 16
600	 10	117.3	17.7	 16
601	 10	94.3	13.3	 16
602	 10	83.0	20.1	 16
603	 10	79.5	12.5	 16
604	 10	66.8	23.1	 16
605	 10	70.5	13.4	 16
606	 10	201.3	163.2	 16
607	 10	69.5	9.1	 16
608	 10	60.8	10.2	 16
609	 10	70.5	13.5	 16
610	 10	126.8	22.9	 16
611	 10	130.0	21.0	 16
612	 10	65.3	15.8	 16
613	 10	155.3	24.3	 16
614	 10	69.0	11.5	 16
615	 10	75.0	7.3	 16
616	 10	88.5	13.6	 16
617	 10	188.5	24.9	 16
618	 10	150.0	24.6	 16
619	 10	70.5	13.5	 16
620	 10	75.0	17.5	 16
621	 10	97.5	14.4	 16
622	 10	60.0	12.0	 16
623	 10	65.3	24.4	 16
624	 10	63.5	8.1	 16
625	 10	83.5	41.9	 16
626	 10	54.5	12.1	 16
627	 10	63.5	14.1	 16
628	 10	117.0	26.8	 16
629	 10	82.0	21.5	 16
630	 10	123.5	11.2	 16
631	 10	233.5	29.1	 16
632	 10	92.0	16.6	 16
633	 10	66.0	12.1	 16
634	 10	411.0	70.9	 16
635	 10	125.0	16.3	 16
636	 10	95.0	20.8	 16
637	 10	59.0	7.3	 16
638	 10	85.8	36.9	 16
639	 10	60.5	13.6	 16
640	 10	62.0	12.0	 16
641	 10	425.0	54.7	 16
642	 10	75.0	19.1	 16
643	 10	63.5	9.5	 16
644	 10	130.8	19.9	 16
645	 10	60.8	12.3	 16
646	 10	88.0	19.9	 16
647	 10	125.3	24.8	 16
648	 10	134.5	22.7	 16
649	 10	58.5	9.4	 16
650	 10	66.8	11.8	 16
651	 10	58.3	10.8	 16
652	 10	69.0	9.8	 16
653	 10	159.3	25.0	 20
654	 10	107.3	18.9	 16
655	 10	94.5	16.8	 16
656	 10	76.5	20.3	 16
657	 10	69.0	10.8	 16
658	 10	250.5	22.7	 16
659	 10	63.8	10.4	 16
660	 10	73.8	14.0	 16
661	 10	57.3	11.7	 16
662	 10	57.5	7.9	 16
663	 10	194.3	25.1	 16
664	 10	116.5	20.4	 16
665	 10	102.8	14.8	 16
666	 10	70.5	15.9	 16
667	 10	289.5	37.9	 16
668	 10	168.8	41.0	 16
669	 10	173.3	20.3	 16
670	 10	168.8	19.6	 16
671	 10	93.5	19.1	 16
672	 10	193.5	34.2	 16
673	 10	117.5	15.2	 16
674	 10	78.8	12.6	 16
675	 10	87.0	11.1	 16
676	 10	98.8	19.4	 16
677	 10	130.3	18.5	 16
678	 10	146.5	158.1	 16
679	 10	73.5	16.0	 16
680	 10	330.5	37.9	 16
681	 10	815.3	102.0	 16
682	 10	927.0	83.4	 16
683	 10	957.5	53.8	 16
684	 10	879.0	74.4	 16
685	 10	123.3	15.7	 16
686	 10	87.0	15.8	 16
687	 10	116.5	71.9	 16
688	 10	55.0	7.9	 16
689	 10	67.5	12.6	 16
690	 10	67.3	10.7	 16
691	 10	202.5	31.4	 16
692	 10	78.3	14.1	 16
693	 10	76.0	11.7	 16
694	 10	88.0	14.6	 16
695	 10	70.3	9.4	 16
696	 10	78.8	19.5	 16
697	 10	130.0	25.1	 16
698	 10	129.8	17.6	 16
699	 10	117.0	14.4	 16
700	 10	100.3	14.3	 16
701	 10	68.3	12.3	 16
702	 10	55.3	14.9	 16
703	 10	67.3	12.8	 16
704	 10	58.3	11.0	 16
705	 10	99.0	13.7	 16
706	 10	79.8	11.3	 16
707	 10	138.3	23.6	 16
708	 10	290.5	36.4	 16
709	 10	359.8	42.8	 16
710	 10	145.3	25.5	 16
711	 10	8605.5	876.5	 16
  0	 11	116.5	19.7	 16
  1	 11	93.5	21.4	 16
  2	 11	60.3	11.2	 16
  3	 11	75.3	10.8	 16
  4	 11	60.3	10.5	 16
  5	 11	268.0	58.2	 16
  6	 11	75.3	22.2	 16
  7	 11	193.5	23.3	 16
  8	 11	114.0	16.8	 16
  9	 11	83.3	24.1	 16
 10	 11	92.0	20.6	 16
 11	 11	55.0	9.4	 16
 12	 11	114.5	19.9	 16
 13	 11	8321.8	681.2	 16
 14	 11	8697.0	772.5	 16
 15	 11	8841.0	851.1	 16
 16	 11	117.3	19.1	 16
 17	 11	68.8	14.9	 16
 18	 11	133.8	21.3	 16
 19	 11	9624.5	863.5	 16
 20	 11	9496.8	865.5	 16
 21	 11	9056.3	1096.0	 16
 22	 11	118.3	14.9	 16
 23	 11	56.5	14.1	 16
 24	 11	9673.5	1922.0	 16
 25	 11	112.5	14.6	 16
 26	 11	108.8	12.1	 16
 27	 11	111.5	19.3	 16
 28	 11	9716.5	1627.5	 16
 29	 11	73.8	15.6	 16
 30	 11	100.3	14.8	 16
 31	 11	9338.3	1358.6	 16
 32	 11	9265.5	1275.9	 16
 33	 11	9092.8	1224.6	 16
 34	 11	112.5	11.5	 16
 35	 11	67.3	13.2	 16
 36	 11	105.3	14.8	 16
 37	 11	8241.8	839.8	 16
 38	 11	8011.5	730.9	 16
 39	 11	7816.8	715.4	 16
 40	 11	121.5	20.8	 16
 41	 11	63.5	11.6	 16
 42	 11	9302.3	1014.7	 16
 43	 11	113.3	16.5	 16
 44	 11	95.3	16.9	 16
 45	 11	101.5	18.0	 16
 46	 11	9382.8	962.8	 16
 47	 11	85.5	26.3	 16
 48	 11	83.3	12.0	 16
 49	 11	96.3	13.1	 16
 50	 11	7966.3	637.4	 16
 51	 11	126.0	25.1	 16
 52	 11	99.8	14.1	 16
 53	 11	54.5	8.6	 16
 54	 11	9607.0	783.0	 16
 55	 11	112.8	24.3	 16
 56	 11	93.0	12.9	 16
 57	 11	86.5	18.0	 16
 58	 11	108.3	30.5	 16
 59	 11	56.3	60.0	 16
 60	 11	51.3	8.6	 16
 61	 11	51.0	9.0	 16
 62	 11	9577.5	708.2	 16
 63	 11	112.8	21.8	 16
 64	 11	90.0	23.7	 16
 65	 11	97.0	15.7	 16
 66	 11	9628.3	1016.2	 16
 67	 11	68.0	15.7	 16
 68	 11	95.0	14.9	 16
 69	 11	7596.0	1274.9	 16
 70	 11	7777.5	1060.7	 16
 71	 11	7973.5	1101.6	 16
 72	 11	117.0	21.7	 16
 73	 11	53.8	11.7	 16
 74	 11	87.3	12.8	 16
 75	 11	81.3	11.0	 16
 76	 11	136.3	42.3	 16
 77	 11	95.0	17.0	 16
 78	 11	95.5	14.1	 16
 79	 11	56.8	11.3	 16
 80	 11	98.8	16.9	 16
 81	 11	7355.5	1209.5	 16
 82	 11	7441.3	563.5	 16
 83	 11	7735.0	618.7	 16
 84	 11	109.0	21.3	 20
 85	 11	50.0	7.3	 16
 86	 11	101.5	21.6	 16
 87	 11	7445.5	594.2	 16
 88	 11	7961.5	488.0	 16
 89	 11	6910.3	951.9	 16
 90	 11	104.3	16.0	 16
 91	 11	53.3	8.2	 16
 92	 11	106.5	17.3	 16
 93	 11	7458.0	480.7	 16
 94	 11	7379.5	810.3	 16
 95	 11	110.5	23.3	 16
 96	 11	92.0	12.6	 16
 97	 11	75.8	37.5	 16
 98	 11	113.3	19.7	 16
 99	 11	7203.8	530.9	 16
100	 11	7299.5	804.7	 16
101	 11	101.8	16.0	 16
102	 11	112.3	24.4	 16
103	 11	63.3	12.1	 16
104	 11	7957.8	826.7	 16
105	 11	95.0	17.6	 16
106	 11	108.8	17.0	 16
107	 11	106.3	16.7	 16
108	 11	8524.3	638.9	 16
109	 11	71.5	16.0	 16
110	 11	64.0	35.4	 16
111	 11	75.8	14.1	 16
112	 11	442.8	85.3	 16
113	 11	97.5	14.5	 16
114	 11	139.8	25.3	 16
115	 11	149.3	20.8	 16
116	 11	148.0	21.5	 16
117	 11	75.0	12.1	 16
118	 11	63.5	11.4	 16
119	 11	89.8	13.0	 16
120	 11	109.8	14.9	 16
121	 11	114.5	16.6	 16
122	 11	153.3	27.0	 16
123	 11	308.3	61.9	 16
124	 11	139.0	23.7	 16
125	 11	78.5	15.8	 16
126	 11	90.0	22.0	 16
127	 11	164.3	24.8	 16
128	 11	63.5	12.7	 16
129	 11	103.3	16.9	 16
130	 11	946.5	143.2	 16
131	 11	73.0	16.2	 16
132	 11	145.3	66.9	 16
133	 11	86.0	11.8	 16
134	 11	104.8	28.4	 16
135	 11	153.3	31.5	 16
136	 11	59.5	9.8	 16
137	 11	62.0	10.6	 16
138	 11	57.5	14.2	 16
139	 11	77.0	15.4	 16
140	 11	63.0	16.9	 16
141	 11	96.5	14.7	 16
142	 11	511.5	64.0	 16
143	 11	320.5	50.4	 16
144	 11	79.3	21.1	 16
145	 11	76.0	18.3	 16
146	 11	201.3	37.9	 16
147	 11	58.5	14.8	 16
148	 11	62.3	9.8	 16
149	 11	103.0	22.7	 16
150	 11	99.8	24.9	 16
151	 11	88.8	15.1	 16
152	 11	98.3	16.2	 16
153	 11	1505.0	259.0	 16
154	 11	1370.0	183.3	 16
155	 11	230.8	34.6	 16
156	 11	75.3	13.6	 16
157	 11	223.3	31.2	 16
158	 11	438.0	52.0	 16
159	 11	144.0	18.6	 16
160	 11	72.5	13.2	 16
161	 11	206.3	30.8	 16
162	 11	85.8	107.1	 16
163	 11	67.0	15.9	 16
164	 11	55.5	9.8	 16
165	 11	74.3	9.4	 16
166	 11	206.0	29.6	 16
167	 11	66.0	9.6	 16
168	 11	78.8	16.4	 16
169	 11	64.0	13.3	 16
170	 11	203.5	28.7	 16
171	 11	86.8	16.8	 16
172	 11	107.0	16.6	 16
173	 11	112.8	20.8	 16
174	 11	113.3	23.7	 16
175	 11	199.3	39.3	 16
176	 11	139.0	34.3	 16
177	 11	87.0	15.2	 16
178	 11	163.5	23.1	 16
179	 11	105.8	21.1	 16
180	 11	86.3	15.9	 16
181	 11	432.8	88.0	 16
182	 11	139.5	27.3	 16
183	 11	59.3	7.9	 16
184	 11	69.5	14.7	 16
185	 11	67.3	10.3	 16
186	 11	60.0	12.8	 16
187	 11	158.5	32.2	 16
188	 11	90.3	8.1	 16
189	 11	144.0	28.1	 16
190	 11	86.8	12.4	 16
191	 11	99.3	13.1	 16
192	 11	100.5	16.9	 16
193	 11	61.5	15.9	 16
194	 11	61.3	9.3	 16
195	 11	73.5	13.5	 16
196	 11	164.5	26.3	 16
197	 11	73.8	14.8	 16
198	 11	136.3	26.7	 16
199	 11	167.8	24.6	 16
200	 11	78.5	11.7	 16
201	 11	100.0	49.8	 16
202	 11	378.3	53.3	 16
203	 11	82.0	20.8	 16
204	 11	57.5	10.6	 16
205	 11	55.0	13.6	 16
206	 11	68.3	22.0	 16
207	 11	56.5	13.7	 16
208	 11	183.3	24.1	 16
209	 11	124.3	23.2	 16
210	 11	103.0	22.4	 16
211	 11	122.0	73.9	 16
212	 11	69.3	10.2	 16
213	 11	174.5	20.2	 16
214	 11	145.5	16.7	 16
215	 11	454.3	50.2	 16
216	 11	211.0	24.3	 16
217	 11	91.3	19.1	 16
218	 11	114.3	26.6	 16
219	 11	91.0	16.1	 16
220	 11	74.3	13.6	 16
221	 11	188.0	24.7	 16
222	 11	516.8	75.1	 16
223	 11	121.3	22.4	 16
224	 11	75.8	17.3	 16
225	 11	155.5	23.8	 16
226	 11	157.5	27.0	 16
227	 11	61.0	12.4	 20
228	 11	95.5	57.2	 16
229	 11	139.3	23.2	 16
230	 11	136.8	27.3	 16
231	 11	183.3	29.6	 16
232	 11	122.8	17.8	 16
233	 11	93.0	16.1	 16
234	 11	81.3	17.5	 16
235	 11	135.3	17.9	 16
236	 11	150.0	14.9	 16
237	 11	91.0	21.2	 16
238	 11	72.8	10.9	 16
239	 11	131.3	32.5	 16
240	 11	402.5	94.9	 16
241	 11	125.5	21.5	 16
242	 11	170.5	40.8	 16
243	 11	71.5	15.9	 16
244	 11	75.8	16.3	 16
245	 11	78.3	12.9	 16
246	 11	64.0	11.7	 16
247	 11	73.0	11.5	 16
248	 11	269.0	41.4	 16
249	 11	77.0	11.3	 16
250	 11	110.3	22.2	 16
251	 11	95.3	14.8	 16
252	 11	77.3	18.4	 16
253	 11	97.5	12.5	 16
254	 11	70.5	15.0	 16
255	 11	70.5	14.4	 16
256	 11	68.3	15.9	 16
257	 11	65.3	11.4	 16
258	 11	126.5	16.1	 16
259	 11	134.0	23.6	 16
260	 11	96.8	12.9	 16
261	 11	62.5	13.2	 16
262	 11	62.5	12.2	 16
263	 11	98.3	11.8	 16
264	 11	62.3	15.2	 16
265	 11	78.8	15.5	 16
266	 11	163.5	24.3	 16
267	 11	126.3	18.1	 16
268	 11	109.3	14.0	 16
269	 11	117.5	86.5	 16
270	 11	110.3	16.2	 16
271	 11	141.0	14.3	 16
272	 11	73.3	14.9	 16
273	 11	75.0	16.6	 16
274	 11	153.3	18.7	 16
275	 11	89.5	17.5	 16
276	 11	73.5	10.0	 16
277	 11	91.0	11.5	 16
278	 11	197.8	33.1	 16
279	 11	138.8	16.8	 16
280	 11	95.0	12.9	 16
281	 11	73.0	16.3	 16
282	 11	135.3	45.8	 16
283	 11	112.3	15.1	 16
284	 11	59.3	13.2	 16
285	 11	70.5	12.8	 16
286	 11	201.5	209.7	 16
287	 11	166.0	30.9	 16
288	 11	471.0	95.4	 16
289	 11	139.5	118.6	 16
290	 11	63.8	12.1	 16
291	 11	69.8	27.8	 16
292	 11	157.0	19.9	 16
293	 11	243.5	35.5	 16
294	 11	136.8	26.8	 16
295	 11	230.0	31.8	 16
296	 11	296.5	46.0	 16
297	 11	425.0	47.9	 16
298	 11	73.0	19.2	 16
299	 11	108.5	12.3	 16
300	 11	170.0	37.0	 16
301	 11	100.3	79.0	 16
302	 11	70.3	12.8	 16
303	 11	104.0	18.9	 16
304	 11	109.0	16.3	 16
305	 11	328.3	35.5	 16
306	 11	124.3	15.8	 16
307	 11	105.3	18.5	 16
308	 11	174.0	19.9	 16
309	 11	215.0	28.2	 16
310	 11	76.5	12.5	 16
311	 11	92.8	16.2	 16
312	 11	68.3	11.3	 16
313	 11	153.8	25.0	 16
314	 11	116.8	18.7	 16
315	 11	71.3	12.0	 16
316	 11	50.0	9.5	 16
317	 11	66.3	11.5	 16
318	 11	70.3	13.2	 16
319	 11	63.3	9.2	 16
320	 11	81.5	11.7	 16
321	 11	78.8	65.4	 16
322	 11	79.0	99.9	 16
323	 11	551.3	49.1	 16
324	 11	104.3	12.3	 16
325	 11	99.5	19.2	 16
326	 11	146.5	23.8	 16
327	 11	89.3	18.5	 16
328	 11	77.8	12.3	 16
329	 11	90.3	17.7	 16
330	 11	722.8	102.2	 16
331	 11	64.8	11.0	 16
332	 11	76.5	26.5	 16
333	 11	91.5	38.7	 16
334	 11	67.3	11.6	 16
335	 11	110.5	13.3	 16
336	 11	58.3	11.4	 16
337	 11	72.5	13.8	 16
338	 11	62.0	11.3	 16
339	 11	85.8	18.4	 16
340	 11	85.3	10.6	 16
341	 11	109.5	20.6	 16
342	 11	212.0	25.1	 16
343	 11	47.8	5.2	 16
344	 11	135.0	21.6	 16
345	 11	81.3	12.9	 16
346	 11	74.0	16.8	 16
347	 11	53.8	12.2	 16
348	 11	64.0	9.4	 16
349	 11	61.5	13.7	 16
350	 11	155.8	22.0	 16
351	 11	70.3	13.2	 16
352	 11	89.8	17.8	 16
353	 11	84.8	20.7	 16
354	 11	131.0	15.8	 16
355	 11	174.3	36.4	 16
356	 11	192.0	30.0	 16
357	 11	165.3	19.3	 16
358	 11	110.3	19.7	 16
359	 11	68.0	15.6	 16
360	 11	93.3	16.8	 16
361	 11	197.8	32.4	 16
362	 11	61.3	11.1	 16
363	 11	73.0	11.6	 16
364	 11	91.8	22.2	 16
365	 11	61.3	14.8	 16
366	 11	62.5	10.7	 16
367	 11	71.8	15.1	 16
368	 11	91.3	16.4	 16
369	 11	91.3	15.2	 20
370	 11	114.3	10.7	 16
371	 11	177.0	22.5	 16
372	 11	107.5	13.4	 16
373	 11	96.5	15.6	 16
374	 11	85.3	15.0	 16
375	 11	175.0	23.7	 16
376	 11	73.5	14.5	 16
377	 11	75.5	17.3	 16
378	 11	148.8	23.7	 16
379	 11	66.8	14.0	 16
380	 11	70.5	10.3	 16
381	 11	98.3	9.4	 16
382	 11	72.8	25.7	 16
383	 11	97.0	21.0	 16
384	 11	87.0	16.3	 16
385	 11	55.3	10.9	 16
386	 11	87.5	11.5	 16
387	 11	81.3	12.8	 16
388	 11	60.5	12.1	 16
389	 11	59.5	8.4	 16
390	 11	94.3	11.8	 16
391	 11	73.3	14.8	 16
392	 11	62.5	7.9	 16
393	 11	68.3	12.5	 16
394	 11	96.5	16.5	 16
395	 11	65.8	10.8	 16
396	 11	123.8	12.5	 16
397	 11	462.8	46.1	 16
398	 11	134.0	22.5	 16
399	 11	110.5	26.7	 16
400	 11	87.3	16.1	 16
401	 11	112.0	16.8	 16
402	 11	71.3	15.2	 16
403	 11	77.5	13.7	 16
404	 11	65.3	16.6	 16
405	 11	67.8	13.4	 16
406	 11	158.3	106.7	 16
407	 11	56.5	11.6	 16
408	 11	75.3	14.1	 16
409	 11	85.3	14.1	 16
410	 11	100.5	62.2	 16
411	 11	78.0	12.8	 16
412	 11	99.5	10.0	 16
413	 11	80.8	10.7	 16
414	 11	69.0	11.6	 16
415	 11	264.3	37.5	 16
416	 11	94.3	13.4	 16
417	 11	100.3	22.3	 16
418	 11	125.3	18.7	 16
419	 11	84.0	16.9	 16
420	 11	57.8	15.3	 16
421	 11	95.5	17.2	 16
422	 11	59.0	15.2	 16
423	 11	108.5	11.9	 16
424	 11	174.8	25.4	 16
425	 11	650.0	82.0	 16
426	 11	111.0	20.0	 16
427	 11	63.8	8.1	 16
428	 11	68.5	10.5	 16
429	 11	85.3	12.2	 16
430	 11	65.3	13.3	 16
431	 11	58.0	8.6	 16
432	 11	87.3	15.0	 16
433	 11	88.8	68.8	 16
434	 11	67.5	15.7	 16
435	 11	79.5	12.2	 16
436	 11	88.0	13.6	 16
437	 11	132.5	21.4	 16
438	 11	719.3	72.6	 16
439	 11	94.5	12.8	 16
440	 11	63.5	13.9	 16
441	 11	99.5	14.4	 16
442	 11	71.5	7.5	 16
443	 11	128.5	14.3	 16
444	 11	55.0	9.9	 16
445	 11	195.5	21.4	 16
446	 11	69.5	14.6	 16
447	 11	88.5	20.7	 16
448	 11	66.3	11.6	 16
449	 11	67.3	16.1	 16
450	 11	138.8	23.1	 16
451	 11	109.0	18.2	 16
452	 11	92.3	21.1	 16
453	 11	77.0	12.4	 16
454	 11	82.5	20.1	 16
455	 11	104.8	24.2	 16
456	 11	75.0	17.0	 16
457	 11	165.3	20.5	 16
458	 11	140.5	36.6	 16
459	 11	93.8	18.5	 16
460	 11	150.0	135.0	 16
461	 11	65.8	9.2	 16
462	 11	69.5	16.2	 16
463	 11	124.0	23.2	 16
464	 11	97.3	22.2	 16
465	 11	69.0	16.1	 16
466	 11	72.8	10.2	 16
467	 11	62.3	9.1	 16
468	 11	89.3	13.4	 16
469	 11	208.5	34.8	 16
470	 11	73.8	13.5	 16
471	 11	82.5	13.7	 16
472	 11	109.5	29.3	 16
473	 11	69.8	14.1	 16
474	 11	52.5	9.6	 16
475	 11	73.3	58.2	 16
476	 11	79.8	20.1	 16
477	 11	68.5	9.9	 16
478	 11	89.0	15.0	 16
479	 11	79.3	11.0	 16
480	 11	75.0	15.6	 16
481	 11	166.3	25.9	 16
482	 11	82.3	18.8	 16
483	 11	63.3	15.2	 16
484	 11	61.3	9.8	 16
485	 11	59.3	7.0	 16
486	 11	116.0	18.1	 16
487	 11	82.8	13.0	 16
488	 11	59.8	65.9	 16
489	 11	51.3	12.1	 16
490	 11	62.0	9.9	 16
491	 11	65.8	19.1	 16
492	 11	65.8	13.3	 16
493	 11	76.0	9.7	 16
494	 11	150.3	18.3	 16
495	 11	70.3	8.1	 16
496	 11	277.5	25.4	 16
497	 11	320.5	28.9	 16
498	 11	279.3	28.7	 16
499	 11	184.3	32.8	 16
500	 11	82.3	15.3	 16
501	 11	71.3	11.5	 16
502	 11	61.3	12.5	 16
503	 11	66.5	13.0	 16
504	 11	151.8	21.4	 16
505	 11	72.0	14.2	 16
506	 11	65.3	13.0	 16
507	 11	118.5	72.6	 16
508	 11	70.5	17.7	 16
509	 11	54.3	7.6	 16
510	 11	80.3	17.0	 16
511	 11	83.8	16.1	 16
512	 11	62.0	17.2	 20
513	 11	108.0	15.6	 16
514	 11	132.3	59.2	 16
515	 11	65.8	9.4	 16
516	 11	71.3	11.3	 16
517	 11	102.3	10.9	 16
518	 11	66.5	11.3	 16
519	 11	193.3	67.6	 16
520	 11	480.5	69.1	 16
521	 11	241.3	21.2	 16
522	 11	57.0	11.0	 16
523	 11	52.3	10.4	 16
524	 11	79.3	20.6	 16
525	 11	61.0	12.8	 16
526	 11	56.8	12.5	 16
527	 11	67.0	14.5	 16
528	 11	58.5	13.4	 16
529	 11	87.5	13.3	 16
530	 11	82.8	26.6	 16
531	 11	57.3	11.9	 16
532	 11	94.3	23.5	 16
533	 11	84.0	12.1	 16
534	 11	75.3	22.1	 16
535	 11	83.5	15.3	 16
536	 11	225.8	33.5	 16
537	 11	251.0	37.1	 16
538	 11	155.3	24.7	 16
539	 11	308.3	39.0	 16
540	 11	273.3	40.0	 16
541	 11	96.0	13.1	 16
542	 11	72.0	12.4	 16
543	 11	73.5	15.1	 16
544	 11	79.8	18.6	 16
545	 11	118.3	21.4	 16
546	 11	81.3	9.1	 16
547	 11	116.8	23.2	 16
548	 11	92.0	19.9	 16
549	 11	58.8	11.9	 16
550	 11	131.3	20.8	 16
551	 11	93.0	14.8	 16
552	 11	69.5	10.1	 16
553	 11	99.5	15.3	 16
554	 11	372.5	79.3	 16
555	 11	138.3	23.5	 16
556	 11	239.5	35.2	 16
557	 11	78.8	14.1	 16
558	 11	921.3	152.5	 16
559	 11	94.0	15.3	 16
560	 11	289.3	41.5	 16
561	 11	477.5	36.1	 16
562	 11	288.8	39.2	 16
563	 11	121.3	29.8	 16
564	 11	158.5	27.1	 16
565	 11	151.3	18.5	 16
566	 11	68.3	10.6	 16
567	 11	85.8	17.5	 16
568	 11	96.5	40.3	 16
569	 11	92.5	16.3	 16
570	 11	1238.5	218.7	 16
571	 11	154.8	23.1	 16
572	 11	58.5	8.8	 16
573	 11	60.5	12.6	 16
574	 11	75.3	10.5	 16
575	 11	83.5	36.0	 16
576	 11	72.0	10.9	 16
577	 11	97.3	16.2	 16
578	 11	116.5	28.7	 16
579	 11	258.5	41.1	 16
580	 11	68.8	10.2	 16
581	 11	288.0	59.7	 16
582	 11	72.5	12.4	 16
583	 11	131.8	66.9	 16
584	 11	58.8	14.5	 16
585	 11	108.0	13.4	 16
586	 11	93.5	14.8	 16
587	 11	133.8	25.0	 16
588	 11	63.0	12.9	 16
589	 11	320.3	54.1	 16
590	 11	134.3	37.4	 16
591	 11	88.0	13.3	 16
592	 11	140.5	34.1	 16
593	 11	83.5	17.0	 16
594	 11	154.8	26.5	 16
595	 11	158.3	30.5	 16
596	 11	315.0	63.9	 16
597	 11	138.8	20.7	 16
598	 11	110.0	14.1	 16
599	 11	124.8	20.1	 16
600	 11	70.5	12.3	 16
601	 11	109.8	13.0	 16
602	 11	129.8	22.0	 16
603	 11	143.5	26.8	 16
604	 11	407.8	79.7	 16
605	 11	70.3	12.1	 16
606	 11	91.0	15.8	 16
607	 11	61.8	12.3	 16
608	 11	61.0	13.3	 16
609	 11	82.0	14.4	 16
610	 11	60.0	9.6	 16
611	 11	176.0	42.1	 16
612	 11	145.5	22.2	 16
613	 11	142.8	15.0	 16
614	 11	127.0	24.0	 16
615	 11	99.3	17.3	 16
616	 11	71.0	16.1	 16
617	 11	87.8	15.1	 16
618	 11	84.3	10.5	 16
619	 11	176.0	30.8	 16
620	 11	60.5	12.3	 16
621	 11	55.0	11.9	 16
622	 11	62.5	11.8	 16
623	 11	69.0	13.1	 16
624	 11	79.0	13.4	 16
625	 11	69.0	26.9	 16
626	 11	67.3	18.5	 16
627	 11	169.5	30.5	 16
628	 11	85.3	14.7	 16
629	 11	61.0	14.4	 16
630	 11	69.3	9.5	 16
631	 11	100.3	31.6	 16
632	 11	133.3	20.7	 16
633	 11	121.0	18.4	 16
634	 11	211.5	24.6	 16
635	 11	78.0	13.1	 16
636	 11	54.5	11.5	 16
637	 11	104.8	16.6	 16
638	 11	105.5	23.5	 16
639	 11	51.0	11.9	 16
640	 11	92.5	16.3	 16
641	 11	98.3	16.6	 16
642	 11	83.3	13.0	 16
643	 11	237.0	48.3	 16
644	 11	137.3	21.6	 16
645	 11	74.3	14.2	 16
646	 11	111.5	36.7	 16
647	 11	75.3	13.9	 16
648	 11	108.8	16.8	 16
649	 11	200.5	30.8	 16
650	 11	69.0	14.1	 16
651	 11	100.3	15.7	 16
652	 11	75.3	11.3	 16
653	 11	63.5	12.6	 16
654	 11	64.3	16.7	 20
655	 11	96.0	18.7	 16
656	 11	71.3	13.9	 16
657	 11	50.0	13.4	 16
658	 11	202.5	27.3	 16
659	 11	74.0	13.5	 16
660	 11	70.3	11.7	 16
661	 11	59.5	8.7	 16
662	 11	90.0	13.9	 16
663	 11	594.8	60.9	 16
664	 11	319.3	40.8	 16
665	 11	150.8	24.2	 16
666	 11	237.0	39.9	 16
667	 11	66.0	11.0	 16
668	 11	132.0	19.9	 16
669	 11	247.5	31.8	 16
670	 11	140.5	17.5	 16
671	 11	778.3	86.5	 16
672	 11	314.3	35.4	 16
673	 11	78.0	17.4	 16
674	 11	92.5	14.8	 16
675	 11	94.3	17.0	 16
676	 11	69.0	11.5	 16
677	 11	249.3	31.2	 16
678	 11	347.8	45.7	 16
679	 11	168.5	24.9	 16
680	 11	202.5	24.5	 16
681	 11	118.0	21.4	 16
682	 11	462.5	65.0	 16
683	 11	170.3	19.7	 16
684	 11	549.0	99.6	 16
685	 11	209.5	26.7	 16
686	 11	119.5	21.0	 16
687	 11	67.0	9.9	 16
688	 11	72.5	8.7	 16
689	 11	69.0	9.1	 16
690	 11	75.0	12.6	 16
691	 11	68.3	15.0	 16
692	 11	81.3	41.9	 16
693	 11	61.3	11.3	 16
694	 11	146.0	21.3	 16
695	 11	117.8	20.6	 16
696	 11	66.5	13.8	 16
697	 11	321.5	43.8	 16
698	 11	170.8	30.4	 16
699	 11	401.5	59.9	 16
700	 11	129.8	26.8	 16
701	 11	179.3	24.4	 16
702	 11	178.3	39.6	 16
703	 11	129.0	21.5	 16
704	 11	63.5	9.8	 16
705	 11	185.3	21.7	 16
706	 11	152.3	28.5	 16
707	 11	98.3	23.4	 16
708	 11	100.5	15.1	 16
709	 11	122.3	14.4	 16
710	 11	200.3	33.6	 16
711	 11	125.3	19.0	 16
  0	 12	8069.0	899.9	 16
  1	 12	108.0	18.9	 16
  2	 12	66.5	12.5	 16
  3	 12	77.8	30.8	 16
  4	 12	63.3	10.1	 16
  5	 12	91.0	59.4	 16
  6	 12	64.0	11.9	 16
  7	 12	123.5	23.3	 16
  8	 12	121.5	36.7	 16
  9	 12	62.5	10.1	 16
 10	 12	76.0	10.4	 16
 11	 12	40.8	7.5	 16
 12	 12	51.3	11.0	 16
 13	 12	59.3	14.5	 16
 14	 12	60.5	15.2	 16
 15	 12	65.8	14.4	 16
 16	 12	50.5	7.6	 16
 17	 12	47.3	8.0	 16
 18	 12	45.3	10.3	 16
 19	 12	58.3	11.5	 16
 20	 12	62.8	14.7	 16
 21	 12	50.3	11.8	 16
 22	 12	60.3	13.2	 16
 23	 12	46.5	11.4	 16
 24	 12	57.3	14.1	 16
 25	 12	54.0	13.7	 16
 26	 12	49.0	13.1	 16
 27	 12	47.3	9.2	 16
 28	 12	54.0	18.1	 16
 29	 12	45.0	10.7	 16
 30	 12	49.0	7.9	 16
 31	 12	53.5	11.7	 16
 32	 12	58.3	10.8	 16
 33	 12	56.3	10.5	 16
 34	 12	58.8	13.5	 16
 35	 12	53.5	8.7	 16
 36	 12	51.8	8.1	 16
 37	 12	60.3	20.0	 16
 38	 12	55.0	7.8	 16
 39	 12	54.0	12.5	 16
 40	 12	51.8	9.1	 16
 41	 12	44.3	6.2	 16
 42	 12	50.8	9.1	 16
 43	 12	66.0	13.6	 16
 44	 12	49.0	8.5	 16
 45	 12	57.0	9.5	 16
 46	 12	45.5	8.0	 16
 47	 12	44.5	9.4	 16
 48	 12	46.5	9.5	 16
 49	 12	52.3	9.8	 16
 50	 12	62.0	10.9	 16
 51	 12	56.0	12.7	 16
 52	 12	52.0	9.7	 16
 53	 12	53.0	9.5	 16
 54	 12	85.5	28.8	 16
 55	 12	50.8	13.2	 16
 56	 12	47.0	9.7	 16
 57	 12	56.0	10.7	 16
 58	 12	47.5	6.5	 16
 59	 12	44.3	8.2	 16
 60	 12	40.0	7.9	 16
 61	 12	43.0	7.9	 16
 62	 12	58.0	18.1	 16
 63	 12	46.5	9.6	 16
 64	 12	52.5	9.1	 16
 65	 12	43.8	10.0	 16
 66	 12	59.3	19.4	 16
 67	 12	45.3	6.7	 16
 68	 12	60.8	10.5	 16
 69	 12	58.3	15.1	 16
 70	 12	51.3	11.6	 16
 71	 12	62.0	10.3	 16
 72	 12	58.0	9.8	 16
 73	 12	50.3	8.3	 16
 74	 12	53.0	12.5	 16
 75	 12	55.5	12.2	 16
 76	 12	54.3	10.3	 16
 77	 12	50.5	9.1	 16
 78	 12	47.0	8.5	 16
 79	 12	44.5	7.0	 16
 80	 12	49.3	8.9	 16
 81	 12	49.8	9.9	 16
 82	 12	50.8	7.1	 16
 83	 12	58.3	12.6	 16
 84	 12	48.3	9.9	 16
 85	 12	50.8	10.7	 16
 86	 12	51.0	11.4	 20
 87	 12	59.8	13.0	 16
 88	 12	59.0	11.3	 16
 89	 12	76.0	34.7	 16
 90	 12	44.0	5.4	 16
 91	 12	51.5	11.2	 16
 92	 12	58.8	14.5	 16
 93	 12	55.5	11.8	 16
 94	 12	58.8	13.7	 16
 95	 12	47.5	11.7	 16
 96	 12	43.3	7.8	 16
 97	 12	46.3	6.9	 16
 98	 12	53.8	11.5	 16
 99	 12	58.0	14.8	 16
100	 12	66.3	18.3	 16
101	 12	53.5	9.9	 16
102	 12	53.0	9.2	 16
103	 12	46.8	7.8	 16
104	 12	58.3	18.6	 16
105	 12	56.5	12.4	 16
106	 12	53.3	9.9	 16
107	 12	45.0	6.5	 16
108	 12	44.3	10.1	 16
109	 12	43.0	7.5	 16
110	 12	49.0	10.6	 16
111	 12	85.3	26.7	 16
112	 12	70.3	16.4	 16
113	 12	274.8	52.8	 16
114	 12	131.5	22.2	 16
115	 12	185.5	52.4	 16
116	 12	125.0	19.7	 16
117	 12	74.5	18.3	 16
118	 12	66.3	10.7	 16
119	 12	79.5	13.3	 16
120	 12	78.5	17.0	 16
121	 12	77.0	13.9	 16
122	 12	81.8	14.6	 16
123	 12	100.3	17.7	 16
124	 12	125.5	12.7	 16
125	 12	69.5	14.7	 16
126	 12	65.3	10.2	 16
127	 12	97.5	21.0	 16
128	 12	66.5	13.8	 16
129	 12	77.0	17.4	 16
130	 12	136.5	19.9	 16
131	 12	59.0	9.7	 16
132	 12	65.5	16.1	 16
133	 12	82.5	17.1	 16
134	 12	74.0	12.3	 16
135	 12	155.5	17.9	 16
136	 12	66.8	11.3	 16
137	 12	59.5	10.9	 16
138	 12	58.0	9.9	 16
139	 12	48.3	9.6	 16
140	 12	58.8	10.8	 16
141	 12	111.0	23.0	 16
142	 12	164.3	22.6	 16
143	 12	124.3	24.1	 16
144	 12	61.3	15.7	 16
145	 12	79.8	15.4	 16
146	 12	69.5	10.6	 16
147	 12	54.3	13.6	 16
148	 12	62.3	10.9	 16
149	 12	83.3	13.8	 16
150	 12	77.5	14.0	 16
151	 12	138.0	21.4	 16
152	 12	80.8	20.4	 16
153	 12	245.8	35.0	 16
154	 12	335.8	27.5	 16
155	 12	58.8	8.7	 16
156	 12	62.0	12.6	 16
157	 12	133.5	111.3	 16
158	 12	403.0	59.2	 16
159	 12	97.3	16.6	 16
160	 12	63.5	9.4	 16
161	 12	97.8	14.5	 16
162	 12	69.3	12.3	 16
163	 12	55.5	9.7	 16
164	 12	59.0	12.0	 16
165	 12	80.0	14.1	 16
166	 12	109.3	20.0	 16
167	 12	66.3	15.8	 16
168	 12	48.3	9.4	 16
169	 12	64.5	25.4	 16
170	 12	101.8	19.2	 16
171	 12	68.0	25.5	 16
172	 12	95.8	16.3	 16
173	 12	92.0	35.1	 16
174	 12	72.5	14.4	 16
175	 12	107.0	15.2	 16
176	 12	99.0	12.1	 16
177	 12	105.5	36.3	 16
178	 12	82.8	15.0	 16
179	 12	94.0	16.5	 16
180	 12	86.3	15.7	 16
181	 12	147.8	24.2	 16
182	 12	100.8	21.2	 16
183	 12	51.5	11.4	 16
184	 12	77.5	14.4	 16
185	 12	79.3	44.8	 16
186	 12	69.3	14.2	 16
187	 12	140.5	16.6	 16
188	 12	72.8	17.8	 16
189	 12	106.5	20.6	 16
190	 12	68.3	13.2	 16
191	 12	65.5	10.9	 16
192	 12	102.5	20.2	 16
193	 12	53.8	10.6	 16
194	 12	78.8	16.3	 16
195	 12	61.0	12.4	 16
196	 12	93.8	13.1	 16
197	 12	50.0	8.8	 16
198	 12	72.3	10.5	 16
199	 12	203.0	21.6	 16
200	 12	58.8	8.4	 16
201	 12	68.5	11.4	 16
202	 12	77.0	19.6	 16
203	 12	87.0	50.1	 16
204	 12	63.8	14.6	 16
205	 12	56.3	16.7	 16
206	 12	65.3	21.8	 16
207	 12	57.3	14.5	 16
208	 12	63.0	10.0	 16
209	 12	82.5	15.6	 16
210	 12	79.3	18.5	 16
211	 12	71.0	14.3	 16
212	 12	105.8	19.2	 16
213	 12	123.8	20.4	 16
214	 12	161.3	92.4	 16
215	 12	379.8	33.4	 16
216	 12	259.0	48.9	 16
217	 12	99.3	13.3	 16
218	 12	77.3	11.2	 16
219	 12	84.3	12.8	 16
220	 12	68.0	11.8	 16
221	 12	109.3	15.0	 16
222	 12	203.8	388.5	 16
223	 12	92.5	18.3	 16
224	 12	62.3	11.1	 16
225	 12	90.5	15.0	 16
226	 12	73.0	9.6	 16
227	 12	59.3	10.4	 16
228	 12	61.3	11.2	 20
229	 12	164.8	21.9	 16
230	 12	169.8	19.8	 16
231	 12	120.3	22.0	 16
232	 12	95.3	16.1	 16
233	 12	101.3	41.2	 16
234	 12	74.0	17.9	 16
235	 12	120.3	11.7	 16
236	 12	120.0	15.3	 16
237	 12	87.3	19.0	 16
238	 12	87.0	14.0	 16
239	 12	75.0	14.6	 16
240	 12	139.5	23.3	 16
241	 12	86.3	15.1	 16
242	 12	87.3	18.5	 16
243	 12	67.8	15.1	 16
244	 12	71.0	11.9	 16
245	 12	74.8	13.9	 16
246	 12	61.0	10.2	 16
247	 12	63.3	10.5	 16
248	 12	73.0	11.6	 16
249	 12	65.0	11.0	 16
250	 12	65.3	10.8	 16
251	 12	82.3	21.3	 16
252	 12	70.5	16.6	 16
253	 12	83.5	15.1	 16
254	 12	82.8	18.4	 16
255	 12	58.3	5.1	 16
256	 12	62.0	11.3	 16
257	 12	70.3	17.0	 16
258	 12	100.8	14.1	 16
259	 12	106.0	20.6	 16
260	 12	94.8	12.7	 16
261	 12	70.5	14.4	 16
262	 12	86.5	23.8	 16
263	 12	77.5	12.9	 16
264	 12	66.0	15.6	 16
265	 12	75.0	14.9	 16
266	 12	194.3	28.5	 16
267	 12	118.5	43.5	 16
268	 12	101.0	13.6	 16
269	 12	85.3	17.4	 16
270	 12	93.3	12.4	 16
271	 12	121.0	24.7	 16
272	 12	72.0	11.0	 16
273	 12	55.8	8.8	 16
274	 12	101.3	14.4	 16
275	 12	123.5	17.9	 16
276	 12	66.5	13.9	 16
277	 12	510.3	734.9	 16
278	 12	87.3	24.2	 16
279	 12	85.8	20.3	 16
280	 12	69.3	14.0	 16
281	 12	72.8	13.0	 16
282	 12	153.5	28.3	 16
283	 12	76.3	15.2	 16
284	 12	73.3	62.1	 16
285	 12	64.8	11.9	 16
286	 12	85.0	13.7	 16
287	 12	69.3	12.4	 16
288	 12	167.8	134.1	 16
289	 12	77.0	10.8	 16
290	 12	63.0	9.2	 16
291	 12	60.5	11.4	 16
292	 12	79.3	15.7	 16
293	 12	87.0	19.1	 16
294	 12	83.0	14.3	 16
295	 12	131.5	21.1	 16
296	 12	193.0	29.2	 16
297	 12	86.8	21.3	 16
298	 12	68.5	11.4	 16
299	 12	98.8	13.7	 16
300	 12	75.8	10.1	 16
301	 12	92.5	19.2	 16
302	 12	77.5	14.4	 16
303	 12	103.3	14.2	 16
304	 12	184.5	61.3	 16
305	 12	490.8	56.7	 16
306	 12	129.0	17.5	 16
307	 12	79.0	9.8	 16
308	 12	145.0	16.3	 16
309	 12	225.0	21.6	 16
310	 12	72.5	17.9	 16
311	 12	77.3	12.1	 16
312	 12	65.8	9.8	 16
313	 12	161.5	17.4	 16
314	 12	59.3	9.6	 16
315	 12	64.3	8.5	 16
316	 12	54.0	8.2	 16
317	 12	134.8	663.1	 16
318	 12	59.0	9.6	 16
319	 12	67.5	15.6	 16
320	 12	62.8	19.9	 16
321	 12	61.3	11.2	 16
322	 12	61.5	13.8	 16
323	 12	148.0	19.2	 16
324	 12	174.8	21.1	 16
325	 12	61.8	51.5	 16
326	 12	69.3	9.8	 16
327	 12	72.5	13.2	 16
328	 12	64.0	12.3	 16
329	 12	74.0	13.2	 16
330	 12	152.3	16.7	 16
331	 12	55.0	8.2	 16
332	 12	58.0	8.3	 16
333	 12	70.8	14.4	 16
334	 12	65.0	12.3	 16
335	 12	80.0	11.1	 16
336	 12	68.3	23.3	 16
337	 12	62.0	12.9	 16
338	 12	69.5	87.3	 16
339	 12	63.0	8.1	 16
340	 12	69.3	10.9	 16
341	 12	99.0	19.3	 16
342	 12	110.5	21.9	 16
343	 12	58.5	7.5	 16
344	 12	72.3	17.3	 16
345	 12	80.0	13.4	 16
346	 12	52.0	15.4	 16
347	 12	57.5	14.2	 16
348	 12	66.3	11.8	 16
349	 12	62.8	16.8	 16
350	 12	252.8	34.9	 16
351	 12	66.0	13.1	 16
352	 12	79.0	8.8	 16
353	 12	128.5	23.5	 16
354	 12	137.0	17.2	 16
355	 12	127.3	17.0	 16
356	 12	137.0	22.7	 16
357	 12	74.8	12.1	 16
358	 12	54.8	7.0	 16
359	 12	59.3	8.8	 16
360	 12	106.5	22.3	 16
361	 12	260.5	41.5	 16
362	 12	65.8	15.4	 16
363	 12	65.5	12.6	 16
364	 12	69.5	12.1	 16
365	 12	74.0	18.9	 16
366	 12	57.5	9.3	 16
367	 12	64.0	13.1	 16
368	 12	60.3	11.0	 16
369	 12	87.3	16.9	 16
370	 12	89.8	16.9	 20
371	 12	181.3	20.7	 16
372	 12	143.3	22.7	 16
373	 12	63.5	10.8	 16
374	 12	72.3	25.7	 16
375	 12	134.3	19.2	 16
376	 12	68.0	16.4	 16
377	 12	69.0	9.2	 16
378	 12	96.3	41.3	 16
379	 12	71.5	16.0	 16
380	 12	58.0	11.6	 16
381	 12	86.3	11.8	 16
382	 12	106.5	23.8	 16
383	 12	56.0	10.6	 16
384	 12	92.3	15.6	 16
385	 12	59.3	13.1	 16
386	 12	88.5	29.7	 16
387	 12	57.5	9.4	 16
388	 12	55.0	6.3	 16
389	 12	47.0	6.2	 16
390	 12	74.8	19.7	 16
391	 12	62.5	9.4	 16
392	 12	57.8	12.7	 16
393	 12	60.5	8.0	 16
394	 12	67.0	9.8	 16
395	 12	58.5	10.7	 16
396	 12	112.3	19.5	 16
397	 12	238.8	32.0	 16
398	 12	136.8	26.7	 16
399	 12	91.0	12.7	 16
400	 12	73.0	11.8	 16
401	 12	74.8	14.1	 16
402	 12	63.5	10.0	 16
403	 12	63.5	16.2	 16
404	 12	70.3	20.8	 16
405	 12	63.5	9.3	 16
406	 12	76.5	13.5	 16
407	 12	63.5	12.1	 16
408	 12	98.0	20.8	 16
409	 12	92.0	17.7	 16
410	 12	134.0	18.4	 16
411	 12	69.5	12.1	 16
412	 12	92.0	28.5	 16
413	 12	72.0	14.8	 16
414	 12	63.3	8.7	 16
415	 12	110.3	15.7	 16
416	 12	108.5	30.8	 16
417	 12	84.5	14.1	 16
418	 12	113.3	16.7	 16
419	 12	73.8	13.8	 16
420	 12	59.3	11.1	 16
421	 12	107.3	15.8	 16
422	 12	77.0	15.0	 16
423	 12	81.3	10.1	 16
424	 12	198.8	30.7	 16
425	 12	223.3	33.5	 16
426	 12	126.0	13.9	 16
427	 12	62.0	12.9	 16
428	 12	88.0	43.2	 16
429	 12	68.0	10.7	 16
430	 12	72.0	12.5	 16
431	 12	58.5	8.7	 16
432	 12	61.3	13.0	 16
433	 12	65.0	13.0	 16
434	 12	56.8	10.8	 16
435	 12	57.3	8.1	 16
436	 12	61.3	9.5	 16
437	 12	64.8	12.1	 16
438	 12	244.0	29.2	 16
439	 12	67.0	16.7	 16
440	 12	63.8	13.0	 16
441	 12	144.8	16.0	 16
442	 12	70.8	14.7	 16
443	 12	119.0	19.2	 16
444	 12	60.8	12.0	 16
445	 12	170.0	37.1	 16
446	 12	72.8	17.4	 16
447	 12	119.0	70.1	 16
448	 12	61.5	13.9	 16
449	 12	66.8	9.2	 16
450	 12	82.0	14.0	 16
451	 12	79.5	14.6	 16
452	 12	66.3	12.4	 16
453	 12	61.8	16.3	 16
454	 12	83.3	12.2	 16
455	 12	57.5	10.9	 16
456	 12	57.3	9.6	 16
457	 12	173.8	28.8	 16
458	 12	126.5	17.2	 16
459	 12	83.5	14.7	 16
460	 12	61.8	16.7	 16
461	 12	79.8	12.8	 16
462	 12	85.0	19.9	 16
463	 12	149.5	23.7	 16
464	 12	91.5	18.5	 16
465	 12	64.5	12.2	 16
466	 12	68.3	15.5	 16
467	 12	58.3	8.9	 16
468	 12	65.0	11.9	 16
469	 12	111.8	11.9	 16
470	 12	96.8	22.4	 16
471	 12	102.5	18.3	 16
472	 12	123.8	44.3	 16
473	 12	60.0	9.8	 16
474	 12	56.8	12.3	 16
475	 12	63.0	14.5	 16
476	 12	57.0	11.8	 16
477	 12	63.8	11.5	 16
478	 12	71.0	10.1	 16
479	 12	68.8	12.8	 16
480	 12	76.3	12.4	 16
481	 12	94.5	15.3	 16
482	 12	70.3	10.2	 16
483	 12	64.0	8.4	 16
484	 12	63.3	11.8	 16
485	 12	59.0	11.2	 16
486	 12	68.5	12.9	 16
487	 12	69.0	9.2	 16
488	 12	65.0	48.8	 16
489	 12	58.5	9.0	 16
490	 12	68.0	14.5	 16
491	 12	65.0	9.9	 16
492	 12	71.5	15.2	 16
493	 12	62.8	10.3	 16
494	 12	202.3	29.8	 16
495	 12	81.3	18.9	 16
496	 12	1398.5	119.3	 16
497	 12	1438.8	103.9	 16
498	 12	1435.0	110.3	 16
499	 12	188.8	23.7	 16
500	 12	70.3	9.5	 16
501	 12	60.3	21.3	 16
502	 12	64.3	12.0	 16
503	 12	73.0	10.7	 16
504	 12	73.3	15.9	 16
505	 12	56.5	10.4	 16
506	 12	56.3	11.3	 16
507	 12	62.3	9.9	 16
508	 12	51.3	11.8	 16
509	 12	63.5	17.6	 16
510	 12	73.3	14.2	 16
511	 12	106.3	15.3	 16
512	 12	64.5	13.9	 16
513	 12	121.3	22.4	 20
514	 12	118.8	19.4	 16
515	 12	69.0	10.3	 16
516	 12	69.3	15.4	 16
517	 12	73.0	14.4	 16
518	 12	66.8	11.7	 16
519	 12	80.3	24.7	 16
520	 12	75.3	14.5	 16
521	 12	115.5	22.6	 16
522	 12	67.0	11.1	 16
523	 12	52.3	10.4	 16
524	 12	155.8	27.4	 16
525	 12	61.0	10.0	 16
526	 12	59.0	9.4	 16
527	 12	60.5	12.9	 16
528	 12	60.5	10.6	 16
529	 12	143.3	24.5	 16
530	 12	60.3	8.5	 16
531	 12	62.3	11.7	 16
532	 12	64.8	10.9	 16
533	 12	87.3	9.8	 16
534	 12	65.3	11.8	 16
535	 12	79.3	18.7	 16
536	 12	98.8	15.4	 16
537	 12	107.0	20.3	 16
538	 12	121.8	15.4	 16
539	 12	244.8	21.8	 16
540	 12	116.8	19.0	 16
541	 12	121.3	19.8	 16
542	 12	109.8	17.0	 16
543	 12	85.8	10.3	 16
544	 12	66.8	11.5	 16
545	 12	71.3	11.8	 16
546	 12	76.0	12.8	 16
547	 12	114.0	22.8	 16
548	 12	74.3	13.9	 16
549	 12	75.5	16.1	 16
550	 12	71.3	11.0	 16
551	 12	73.8	16.7	 16
552	 12	63.5	13.1	 16
553	 12	73.3	10.8	 16
554	 12	110.5	17.1	 16
555	 12	83.5	14.3	 16
556	 12	103.0	21.7	 16
557	 12	103.3	40.4	 16
558	 12	147.3	24.3	 16
559	 12	78.0	14.1	 16
560	 12	333.0	55.5	 16
561	 12	370.8	47.3	 16
562	 12	107.3	16.4	 16
563	 12	105.8	18.3	 16
564	 12	100.5	16.0	 16
565	 12	103.8	21.1	 16
566	 12	66.3	12.9	 16
567	 12	128.5	43.8	 16
568	 12	66.8	11.1	 16
569	 12	63.8	11.8	 16
570	 12	187.5	35.4	 16
571	 12	142.0	19.4	 16
572	 12	72.5	17.0	 16
573	 12	66.5	13.5	 16
574	 12	74.3	9.5	 16
575	 12	67.3	14.8	 16
576	 12	64.0	12.1	 16
577	 12	76.5	11.2	 16
578	 12	120.0	20.3	 16
579	 12	133.0	22.0	 16
580	 12	70.0	14.3	 16
581	 12	167.8	29.2	 16
582	 12	73.0	14.4	 16
583	 12	130.3	25.4	 16
584	 12	54.5	11.2	 16
585	 12	160.3	22.7	 16
586	 12	204.3	34.6	 16
587	 12	69.5	19.3	 16
588	 12	71.3	13.4	 16
589	 12	104.0	15.1	 16
590	 12	101.5	16.2	 16
591	 12	82.0	12.6	 16
592	 12	98.3	11.8	 16
593	 12	77.8	12.9	 16
594	 12	201.3	24.7	 16
595	 12	105.5	15.6	 16
596	 12	92.8	11.8	 16
597	 12	97.8	16.0	 16
598	 12	130.0	20.0	 16
599	 12	101.8	18.8	 16
600	 12	293.3	38.3	 16
601	 12	119.5	21.5	 16
602	 12	110.8	15.8	 16
603	 12	74.8	12.8	 16
604	 12	79.8	8.6	 16
605	 12	65.5	16.5	 16
606	 12	61.5	11.6	 16
607	 12	60.3	11.7	 16
608	 12	69.3	12.9	 16
609	 12	61.0	8.7	 16
610	 12	68.0	11.3	 16
611	 12	69.3	10.2	 16
612	 12	76.3	19.5	 16
613	 12	192.3	31.7	 16
614	 12	92.8	21.9	 16
615	 12	101.5	14.8	 16
616	 12	78.3	13.0	 16
617	 12	82.0	15.5	 16
618	 12	87.0	11.3	 16
619	 12	244.0	47.1	 16
620	 12	65.8	10.6	 16
621	 12	49.5	9.2	 16
622	 12	62.0	8.4	 16
623	 12	63.5	9.9	 16
624	 12	60.0	10.5	 16
625	 12	61.3	12.5	 16
626	 12	79.3	16.6	 16
627	 12	73.3	14.2	 16
628	 12	70.3	12.3	 16
629	 12	65.8	13.5	 16
630	 12	65.5	12.0	 16
631	 12	72.8	12.1	 16
632	 12	82.0	14.0	 16
633	 12	86.8	13.9	 16
634	 12	163.8	31.3	 16
635	 12	75.3	11.0	 16
636	 12	62.3	10.9	 16
637	 12	78.5	18.6	 16
638	 12	65.8	12.9	 16
639	 12	53.8	9.1	 16
640	 12	127.8	17.3	 16
641	 12	88.0	15.8	 16
642	 12	80.3	13.3	 16
643	 12	91.0	11.3	 16
644	 12	112.3	20.9	 16
645	 12	58.8	8.4	 16
646	 12	86.3	7.8	 16
647	 12	103.3	14.8	 16
648	 12	84.5	11.8	 16
649	 12	166.0	23.5	 16
650	 12	86.0	14.4	 16
651	 12	50.3	8.0	 16
652	 12	62.0	15.2	 16
653	 12	63.5	9.4	 16
654	 12	58.0	11.2	 16
655	 12	74.8	12.9	 20
656	 12	62.3	14.3	 16
657	 12	57.0	10.8	 16
658	 12	88.5	13.9	 16
659	 12	79.5	12.7	 16
660	 12	57.5	11.2	 16
661	 12	68.5	10.4	 16
662	 12	99.3	18.2	 16
663	 12	179.3	20.9	 16
664	 12	141.3	22.0	 16
665	 12	77.5	13.7	 16
666	 12	164.3	37.5	 16
667	 12	93.5	56.6	 16
668	 12	93.3	13.6	 16
669	 12	129.3	14.2	 16
670	 12	106.0	17.6	 16
671	 12	284.8	48.4	 16
672	 12	446.0	45.6	 16
673	 12	68.3	12.3	 16
674	 12	91.0	18.7	 16
675	 12	69.3	13.8	 16
676	 12	65.0	14.2	 16
677	 12	109.5	17.9	 16
678	 12	180.5	47.8	 16
679	 12	213.8	24.9	 16
680	 12	284.3	42.5	 16
681	 12	138.3	15.0	 16
682	 12	141.3	27.9	 16
683	 12	192.0	76.1	 16
684	 12	151.0	27.9	 16
685	 12	222.0	26.4	 16
686	 12	98.0	15.5	 16
687	 12	68.5	11.6	 16
688	 12	59.5	16.2	 16
689	 12	60.0	13.1	 16
690	 12	83.5	7.6	 12
691	 12	64.8	11.4	 16
692	 12	62.5	13.4	 16
693	 12	82.0	16.9	 16
694	 12	89.5	13.2	 16
695	 12	81.8	10.7	 16
696	 12	58.8	9.9	 16
697	 12	106.0	69.0	 16
698	 12	68.5	12.8	 16
699	 12	126.8	26.5	 16
700	 12	183.3	34.6	 16
701	 12	103.3	19.5	 16
702	 12	66.0	9.6	 16
703	 12	58.3	8.3	 16
704	 12	73.3	25.7	 16
705	 12	99.8	17.0	 16
706	 12	111.3	20.7	 16
707	 12	124.3	18.5	 16
708	 12	148.8	20.2	 16
709	 12	125.8	15.5	 16
710	 12	102.3	15.6	 16
711	 12	8434.8	950.1	 16
  0	 13	100.3	13.1	 16
  1	 13	149.0	19.8	 16
  2	 13	81.0	14.3	 16
  3	 13	92.5	15.2	 16
  4	 13	144.3	19.4	 16
  5	 13	85.3	17.8	 16
  6	 13	55.3	5.9	 16
  7	 13	116.0	21.9	 16
  8	 13	113.8	18.8	 16
  9	 13	204.0	31.0	 16
 10	 13	95.5	16.2	 16
 11	 13	61.3	7.9	 16
 12	 13	149.3	161.5	 16
 13	 13	66.3	11.1	 16
 14	 13	99.0	44.7	 16
 15	 13	147.5	27.7	 16
 16	 13	244.3	31.9	 16
 17	 13	227.5	26.3	 16
 18	 13	77.3	14.4	 16
 19	 13	81.8	16.0	 16
 20	 13	108.8	23.7	 16
 21	 13	191.5	24.9	 16
 22	 13	73.3	17.2	 16
 23	 13	60.0	8.7	 16
 24	 13	63.0	13.1	 16
 25	 13	88.8	14.7	 16
 26	 13	71.8	13.0	 16
 27	 13	431.0	63.7	 16
 28	 13	117.5	23.5	 16
 29	 13	83.3	18.1	 16
 30	 13	63.0	11.6	 16
 31	 13	323.8	41.7	 16
 32	 13	70.8	10.3	 16
 33	 13	162.8	27.2	 16
 34	 13	497.5	60.3	 16
 35	 13	284.0	38.6	 16
 36	 13	102.3	16.9	 16
 37	 13	312.8	71.9	 16
 38	 13	95.5	15.7	 16
 39	 13	170.5	25.3	 16
 40	 13	93.3	16.7	 16
 41	 13	133.3	17.2	 16
 42	 13	93.8	21.1	 16
 43	 13	76.5	13.8	 16
 44	 13	71.0	11.9	 16
 45	 13	177.5	18.7	 16
 46	 13	360.8	38.6	 16
 47	 13	1597.3	102.0	 16
 48	 13	178.8	25.0	 16
 49	 13	86.3	11.3	 16
 50	 13	72.0	12.1	 16
 51	 13	755.8	81.4	 16
 52	 13	93.5	14.5	 16
 53	 13	60.5	14.3	 16
 54	 13	99.3	57.7	 16
 55	 13	73.3	12.8	 16
 56	 13	65.0	12.5	 16
 57	 13	77.3	10.4	 16
 58	 13	64.5	13.5	 16
 59	 13	91.3	10.8	 16
 60	 13	80.0	12.5	 16
 61	 13	114.8	58.5	 16
 62	 13	113.5	21.0	 16
 63	 13	121.3	17.8	 16
 64	 13	868.8	119.7	 16
 65	 13	165.8	29.0	 16
 66	 13	89.5	16.5	 16
 67	 13	114.0	24.5	 16
 68	 13	136.3	25.2	 16
 69	 13	85.0	16.9	 16
 70	 13	66.0	11.4	 16
 71	 13	136.0	24.7	 16
 72	 13	60.3	9.7	 16
 73	 13	57.8	12.0	 16
 74	 13	111.8	16.1	 16
 75	 13	65.8	10.5	 16
 76	 13	73.8	8.5	 16
 77	 13	1164.8	131.1	 16
 78	 13	157.0	35.9	 16
 79	 13	62.5	15.3	 16
 80	 13	137.5	23.7	 16
 81	 13	76.3	16.1	 16
 82	 13	137.5	17.6	 16
 83	 13	87.0	14.7	 16
 84	 13	56.3	12.2	 16
 85	 13	57.3	10.4	 16
 86	 13	139.5	29.8	 16
 87	 13	78.5	15.9	 20
 88	 13	302.8	36.7	 16
 89	 13	518.8	63.6	 16
 90	 13	107.5	19.4	 16
 91	 13	284.3	32.1	 16
 92	 13	63.5	11.6	 16
 93	 13	82.8	13.8	 16
 94	 13	103.8	18.7	 16
 95	 13	86.3	15.4	 16
 96	 13	64.3	11.2	 16
 97	 13	56.5	11.6	 16
 98	 13	69.5	10.2	 16
 99	 13	64.3	7.5	 16
100	 13	68.0	13.4	 16
101	 13	327.3	46.4	 16
102	 13	70.8	15.4	 16
103	 13	87.3	16.0	 16
104	 13	70.8	15.5	 16
105	 13	69.0	10.7	 16
106	 13	188.8	32.8	 16
107	 13	70.0	15.9	 16
108	 13	76.0	11.9	 16
109	 13	68.0	9.6	 16
110	 13	91.3	23.2	 16
111	 13	123.0	13.7	 16
112	 13	203.8	24.7	 16
113	 13	93.0	13.0	 16
114	 13	74.0	13.7	 16
115	 13	119.3	24.2	 16
116	 13	84.0	14.5	 16
117	 13	95.3	18.6	 16
118	 13	77.8	16.4	 16
119	 13	114.0	18.7	 16
120	 13	429.5	57.0	 16
121	 13	109.3	15.5	 16
122	 13	62.0	11.5	 16
123	 13	111.3	22.2	 16
124	 13	128.5	19.7	 16
125	 13	76.0	10.6	 16
126	 13	390.5	61.1	 16
127	 13	85.0	15.1	 16
128	 13	71.3	10.7	 16
129	 13	179.0	25.5	 16
130	 13	69.5	10.7	 16
131	 13	128.0	22.8	 16
132	 13	120.0	21.5	 16
133	 13	122.8	22.0	 16
134	 13	806.0	98.8	 16
135	 13	91.0	17.3	 16
136	 13	85.3	17.8	 16
137	 13	116.0	18.0	 16
138	 13	143.5	24.2	 16
139	 13	88.0	12.2	 16
140	 13	64.3	8.0	 16
141	 13	56.0	11.1	 16
142	 13	227.3	43.1	 16
143	 13	77.8	14.1	 16
144	 13	170.0	24.2	 16
145	 13	220.0	32.6	 16
146	 13	824.3	103.1	 16
147	 13	67.0	13.3	 16
148	 13	301.0	22.8	 16
149	 13	96.3	14.1	 16
150	 13	98.3	11.5	 16
151	 13	63.3	16.5	 16
152	 13	78.3	11.4	 16
153	 13	2815.8	520.6	 16
154	 13	154.0	13.7	 16
155	 13	65.3	10.6	 16
156	 13	78.0	12.0	 16
157	 13	82.3	13.2	 16
158	 13	109.3	21.5	 16
159	 13	110.5	19.2	 16
160	 13	68.3	16.3	 16
161	 13	128.8	70.6	 16
162	 13	68.0	15.1	 16
163	 13	52.5	10.9	 16
164	 13	112.8	29.4	 16
165	 13	138.8	20.3	 16
166	 13	71.8	12.3	 16
167	 13	73.0	10.6	 16
168	 13	77.5	15.0	 16
169	 13	65.8	18.5	 16
170	 13	78.0	17.6	 16
171	 13	60.8	11.0	 16
172	 13	67.8	13.4	 16
173	 13	66.3	11.8	 16
174	 13	80.0	11.2	 16
175	 13	93.0	15.7	 16
176	 13	94.0	21.8	 16
177	 13	66.0	12.4	 16
178	 13	120.8	20.2	 16
179	 13	64.0	9.0	 16
180	 13	159.0	20.5	 16
181	 13	144.8	31.7	 16
182	 13	115.3	15.2	 16
183	 13	61.3	10.5	 16
184	 13	73.8	16.5	 16
185	 13	57.3	10.7	 16
186	 13	391.0	65.6	 16
187	 13	174.0	27.5	 16
188	 13	122.8	84.2	 16
189	 13	86.3	13.7	 16
190	 13	101.0	16.6	 16
191	 13	82.3	13.2	 16
192	 13	88.8	16.0	 16
193	 13	108.0	74.6	 16
194	 13	78.0	15.9	 16
195	 13	124.5	17.6	 16
196	 13	97.5	12.2	 16
197	 13	63.5	11.7	 16
198	 13	111.0	13.6	 16
199	 13	79.8	13.8	 16
200	 13	111.0	22.9	 16
201	 13	54.5	12.0	 16
202	 13	85.3	14.1	 16
203	 13	67.0	14.3	 16
204	 13	59.5	9.2	 16
205	 13	65.5	8.4	 16
206	 13	64.8	15.0	 16
207	 13	59.8	11.8	 16
208	 13	59.3	9.3	 16
209	 13	62.8	10.7	 16
210	 13	57.0	9.1	 16
211	 13	99.0	24.7	 16
212	 13	552.0	69.9	 16
213	 13	99.0	19.6	 16
214	 13	67.0	15.2	 16
215	 13	85.3	15.2	 16
216	 13	71.0	14.2	 16
217	 13	58.3	11.4	 16
218	 13	72.5	11.9	 16
219	 13	67.3	9.9	 16
220	 13	123.3	22.1	 16
221	 13	125.3	18.5	 16
222	 13	120.3	18.3	 16
223	 13	230.0	25.0	 16
224	 13	87.3	18.9	 16
225	 13	64.3	11.2	 16
226	 13	80.5	15.5	 16
227	 13	74.3	9.8	 16
228	 13	95.8	16.1	 16
229	 13	66.5	10.4	 20
230	 13	60.0	7.3	 16
231	 13	196.0	15.3	 16
232	 13	220.5	31.5	 16
233	 13	246.3	36.1	 16
234	 13	71.3	13.5	 16
235	 13	376.8	53.7	 16
236	 13	243.3	28.7	 16
237	 13	1193.8	146.7	 16
238	 13	1149.0	135.1	 16
239	 13	416.8	68.6	 16
240	 13	133.0	28.0	 16
241	 13	1181.5	210.9	 16
242	 13	1105.5	255.2	 16
243	 13	100.8	21.9	 16
244	 13	94.8	14.8	 16
245	 13	55.5	6.7	 16
246	 13	105.3	21.1	 16
247	 13	63.8	8.6	 16
248	 13	70.3	11.9	 16
249	 13	52.0	7.3	 16
250	 13	73.0	14.1	 16
251	 13	62.5	15.0	 16
252	 13	59.8	10.0	 16
253	 13	56.8	11.6	 16
254	 13	71.3	13.5	 16
255	 13	71.5	12.6	 16
256	 13	183.3	24.4	 16
257	 13	72.5	15.3	 16
258	 13	101.0	14.3	 16
259	 13	65.3	9.2	 16
260	 13	59.3	10.5	 16
261	 13	93.5	21.5	 16
262	 13	79.8	13.4	 16
263	 13	131.8	24.9	 16
264	 13	79.3	18.3	 16
265	 13	81.5	14.0	 16
266	 13	102.8	17.1	 16
267	 13	138.3	22.0	 16
268	 13	65.0	16.1	 16
269	 13	162.3	23.0	 16
270	 13	98.3	16.2	 16
271	 13	75.3	11.7	 16
272	 13	81.0	17.0	 16
273	 13	68.3	10.1	 16
274	 13	64.5	13.8	 16
275	 13	71.0	16.0	 16
276	 13	636.5	84.3	 16
277	 13	58.3	15.7	 16
278	 13	63.3	12.9	 16
279	 13	70.3	15.0	 16
280	 13	61.3	12.0	 16
281	 13	83.0	75.5	 16
282	 13	76.0	16.9	 16
283	 13	103.5	13.5	 16
284	 13	65.5	16.6	 16
285	 13	83.0	32.5	 16
286	 13	312.3	51.2	 16
287	 13	96.5	17.8	 16
288	 13	64.0	12.1	 16
289	 13	71.0	15.7	 16
290	 13	113.8	18.2	 16
291	 13	66.3	11.2	 16
292	 13	99.3	14.9	 16
293	 13	67.3	12.0	 16
294	 13	108.3	20.4	 16
295	 13	128.8	22.6	 16
296	 13	113.3	23.0	 16
297	 13	106.0	16.8	 16
298	 13	225.3	52.3	 16
299	 13	187.5	30.0	 16
300	 13	127.8	21.7	 16
301	 13	110.8	15.4	 16
302	 13	152.3	24.2	 16
303	 13	100.0	17.9	 16
304	 13	179.3	20.5	 16
305	 13	99.0	14.7	 16
306	 13	159.3	35.3	 16
307	 13	85.8	17.0	 16
308	 13	83.0	13.9	 16
309	 13	263.3	38.1	 16
310	 13	196.8	23.8	 16
311	 13	119.8	11.5	 16
312	 13	67.8	12.7	 16
313	 13	70.3	12.2	 16
314	 13	67.3	10.0	 16
315	 13	53.3	9.8	 16
316	 13	80.0	5.9	 16
317	 13	120.0	24.2	 16
318	 13	62.3	10.4	 16
319	 13	72.0	8.1	 16
320	 13	100.3	27.9	 16
321	 13	96.8	13.7	 16
322	 13	104.5	19.7	 16
323	 13	631.5	66.4	 16
324	 13	120.5	91.6	 16
325	 13	148.0	20.3	 16
326	 13	121.3	15.2	 16
327	 13	127.8	19.5	 16
328	 13	85.5	17.9	 16
329	 13	197.3	41.7	 16
330	 13	223.8	34.9	 16
331	 13	193.8	24.4	 16
332	 13	100.3	20.1	 16
333	 13	90.8	15.4	 16
334	 13	62.3	11.9	 16
335	 13	71.0	18.1	 16
336	 13	68.8	27.2	 16
337	 13	46.5	6.8	 16
338	 13	91.3	30.2	 16
339	 13	143.3	23.3	 16
340	 13	145.3	31.1	 16
341	 13	822.5	113.8	 16
342	 13	63.3	13.5	 16
343	 13	57.5	11.6	 16
344	 13	70.0	14.0	 16
345	 13	93.3	16.3	 16
346	 13	174.3	36.4	 16
347	 13	69.5	11.5	 16
348	 13	114.3	25.5	 16
349	 13	343.5	61.9	 16
350	 13	780.8	117.7	 16
351	 13	105.0	19.8	 16
352	 13	88.3	17.5	 16
353	 13	677.3	123.3	 16
354	 13	309.5	62.0	 16
355	 13	233.8	41.7	 16
356	 13	134.5	23.0	 16
357	 13	128.5	15.7	 16
358	 13	84.0	14.9	 16
359	 13	175.8	250.5	 16
360	 13	66.8	9.9	 16
361	 13	227.3	29.9	 16
362	 13	95.3	13.5	 16
363	 13	65.0	10.4	 16
364	 13	62.0	6.7	 16
365	 13	51.3	9.9	 16
366	 13	67.0	15.0	 16
367	 13	208.0	35.4	 16
368	 13	58.3	15.8	 16
369	 13	71.5	12.9	 16
370	 13	189.0	25.1	 16
371	 13	250.8	28.5	 16
372	 13	200.0	29.6	 20
373	 13	95.3	16.1	 16
374	 13	67.3	13.5	 16
375	 13	147.8	20.9	 16
376	 13	107.0	18.5	 16
377	 13	163.5	29.7	 16
378	 13	76.3	13.5	 16
379	 13	190.3	16.3	 16
380	 13	172.5	22.8	 16
381	 13	56.3	11.9	 16
382	 13	76.0	83.3	 16
383	 13	111.0	15.4	 16
384	 13	174.5	15.3	 16
385	 13	60.3	8.3	 16
386	 13	69.8	7.7	 16
387	 13	63.3	7.6	 16
388	 13	76.0	8.8	 16
389	 13	70.5	10.2	 16
390	 13	110.8	23.6	 16
391	 13	95.5	13.4	 16
392	 13	64.0	17.8	 16
393	 13	57.3	13.7	 16
394	 13	174.0	29.4	 16
395	 13	76.8	13.5	 16
396	 13	141.0	17.5	 16
397	 13	193.8	33.0	 16
398	 13	103.5	16.6	 16
399	 13	79.5	14.8	 16
400	 13	283.5	35.9	 16
401	 13	153.3	21.9	 16
402	 13	90.0	12.6	 16
403	 13	72.0	9.6	 16
404	 13	91.0	29.1	 16
405	 13	60.0	12.5	 16
406	 13	142.5	21.8	 16
407	 13	142.3	25.5	 16
408	 13	76.3	15.4	 16
409	 13	82.5	11.6	 16
410	 13	111.8	21.8	 16
411	 13	84.0	15.7	 16
412	 13	88.5	13.7	 16
413	 13	387.0	45.0	 16
414	 13	172.3	57.5	 16
415	 13	145.5	23.2	 16
416	 13	90.0	14.0	 16
417	 13	123.0	22.3	 16
418	 13	141.5	16.4	 16
419	 13	101.3	20.2	 16
420	 13	86.8	13.5	 16
421	 13	61.5	13.0	 16
422	 13	106.8	17.6	 16
423	 13	85.3	12.9	 16
424	 13	102.0	12.2	 16
425	 13	92.5	14.9	 16
426	 13	64.5	15.2	 16
427	 13	314.0	48.2	 16
428	 13	88.3	14.2	 16
429	 13	121.8	26.2	 16
430	 13	67.3	10.7	 16
431	 13	149.5	25.2	 16
432	 13	184.8	17.8	 16
433	 13	476.5	64.9	 16
434	 13	655.8	48.2	 16
435	 13	92.3	17.8	 16
436	 13	87.5	19.3	 16
437	 13	107.3	12.4	 16
438	 13	129.5	16.1	 16
439	 13	955.0	171.0	 16
440	 13	64.5	12.9	 16
441	 13	88.3	12.9	 16
442	 13	101.0	18.8	 16
443	 13	74.3	11.0	 16
444	 13	90.0	17.5	 16
445	 13	61.5	12.8	 16
446	 13	88.3	14.8	 16
447	 13	64.5	14.9	 16
448	 13	80.0	14.6	 16
449	 13	58.0	9.6	 16
450	 13	56.3	12.8	 16
451	 13	61.8	14.8	 16
452	 13	69.8	14.6	 16
453	 13	62.3	13.9	 16
454	 13	83.0	10.4	 16
455	 13	140.5	32.4	 16
456	 13	64.3	14.4	 16
457	 13	76.5	19.4	 16
458	 13	103.8	17.2	 16
459	 13	97.0	42.1	 16
460	 13	100.0	23.9	 16
461	 13	128.0	22.5	 16
462	 13	398.3	57.9	 16
463	 13	90.5	16.4	 16
464	 13	69.8	8.6	 16
465	 13	155.0	14.2	 16
466	 13	132.5	22.4	 16
467	 13	111.0	18.5	 16
468	 13	64.0	13.1	 16
469	 13	71.8	13.5	 16
470	 13	79.5	14.4	 16
471	 13	98.8	15.4	 16
472	 13	59.0	13.3	 16
473	 13	119.0	19.7	 16
474	 13	118.8	18.3	 16
475	 13	81.8	112.7	 16
476	 13	62.3	13.4	 16
477	 13	64.0	10.9	 16
478	 13	65.8	13.6	 16
479	 13	81.5	14.4	 16
480	 13	9715.3	865.8	 16
481	 13	178.0	31.4	 16
482	 13	90.5	15.3	 16
483	 13	56.8	8.2	 16
484	 13	64.5	17.0	 16
485	 13	101.8	16.0	 16
486	 13	124.3	26.5	 16
487	 13	131.3	19.6	 16
488	 13	99.3	31.0	 16
489	 13	74.0	15.6	 16
490	 13	58.3	11.3	 16
491	 13	54.0	10.5	 16
492	 13	54.3	11.5	 16
493	 13	57.8	10.2	 16
494	 13	67.8	13.9	 16
495	 13	79.8	15.0	 16
496	 13	81.5	15.1	 16
497	 13	87.8	15.7	 16
498	 13	71.5	12.2	 16
499	 13	113.0	24.4	 16
500	 13	102.0	18.9	 16
501	 13	64.0	11.4	 16
502	 13	81.8	13.2	 16
503	 13	60.5	6.4	 16
504	 13	70.5	10.9	 16
505	 13	48.5	10.8	 16
506	 13	93.5	15.9	 16
507	 13	79.5	12.7	 16
508	 13	302.3	47.7	 16
509	 13	182.3	38.2	 16
510	 13	76.5	12.9	 16
511	 13	165.5	58.8	 16
512	 13	92.5	15.6	 16
513	 13	113.8	16.6	 16
514	 13	157.0	21.1	 20
515	 13	183.0	23.8	 16
516	 13	171.0	79.1	 16
517	 13	89.0	15.2	 16
518	 13	76.5	10.2	 16
519	 13	87.3	14.5	 16
520	 13	86.5	11.6	 16
521	 13	74.5	11.7	 16
522	 13	113.3	19.7	 16
523	 13	122.5	19.5	 16
524	 13	127.5	25.6	 16
525	 13	60.5	11.6	 16
526	 13	74.3	13.1	 16
527	 13	163.8	21.9	 16
528	 13	302.3	88.4	 16
529	 13	215.5	27.9	 16
530	 13	94.3	16.5	 16
531	 13	86.5	18.7	 16
532	 13	116.3	25.2	 16
533	 13	73.0	9.0	 16
534	 13	69.8	11.1	 16
535	 13	172.8	34.5	 16
536	 13	71.0	16.2	 16
537	 13	120.3	14.3	 16
538	 13	152.0	17.9	 16
539	 13	120.3	22.5	 16
540	 13	114.3	16.0	 16
541	 13	170.5	24.0	 16
542	 13	74.5	16.9	 16
543	 13	108.3	108.0	 16
544	 13	69.0	13.3	 16
545	 13	94.5	25.4	 16
546	 13	137.5	28.5	 16
547	 13	552.5	48.4	 16
548	 13	312.5	39.2	 16
549	 13	158.0	22.3	 16
550	 13	71.0	17.4	 16
551	 13	108.0	18.6	 16
552	 13	67.5	15.5	 16
553	 13	1448.3	346.3	 16
554	 13	51.5	7.0	 16
555	 13	63.5	9.9	 16
556	 13	323.3	78.4	 16
557	 13	58.3	9.4	 16
558	 13	75.5	10.8	 16
559	 13	110.8	19.7	 16
560	 13	92.0	16.1	 16
561	 13	89.0	15.6	 16
562	 13	116.5	29.2	 16
563	 13	427.0	71.3	 16
564	 13	118.3	17.0	 16
565	 13	75.3	9.9	 16
566	 13	114.0	21.6	 16
567	 13	285.0	35.5	 16
568	 13	164.8	19.2	 16
569	 13	132.5	13.9	 16
570	 13	74.3	17.9	 16
571	 13	53.0	12.5	 16
572	 13	83.3	19.2	 16
573	 13	92.8	14.5	 16
574	 13	115.3	14.2	 16
575	 13	131.3	12.2	 16
576	 13	132.3	27.4	 16
577	 13	92.3	14.3	 16
578	 13	224.3	29.1	 16
579	 13	346.3	42.6	 16
580	 13	155.5	28.9	 16
581	 13	111.3	16.3	 16
582	 13	97.8	12.8	 16
583	 13	58.3	9.0	 16
584	 13	214.0	40.6	 16
585	 13	107.0	22.9	 16
586	 13	84.8	14.8	 16
587	 13	113.8	24.9	 16
588	 13	73.8	15.0	 16
589	 13	89.3	12.4	 16
590	 13	73.5	15.3	 16
591	 13	154.3	22.1	 16
592	 13	296.3	53.5	 16
593	 13	88.0	15.7	 16
594	 13	151.0	16.1	 16
595	 13	196.3	36.7	 16
596	 13	88.3	13.9	 16
597	 13	694.3	147.5	 16
598	 13	166.0	15.3	 16
599	 13	108.3	20.0	 16
600	 13	115.3	15.3	 16
601	 13	115.3	19.1	 16
602	 13	160.3	22.9	 16
603	 13	67.8	10.7	 16
604	 13	86.8	15.5	 16
605	 13	125.8	18.7	 16
606	 13	122.8	17.2	 16
607	 13	66.3	9.3	 16
608	 13	72.3	11.8	 16
609	 13	69.3	9.8	 16
610	 13	55.3	8.0	 16
611	 13	65.8	14.1	 16
612	 13	83.5	14.9	 16
613	 13	98.8	14.0	 16
614	 13	139.3	23.9	 16
615	 13	187.8	24.9	 16
616	 13	264.8	42.0	 16
617	 13	138.8	21.5	 16
618	 13	113.5	19.7	 16
619	 13	187.0	27.0	 16
620	 13	81.0	23.6	 16
621	 13	66.3	10.7	 16
622	 13	92.0	10.2	 16
623	 13	85.5	15.8	 16
624	 13	79.3	12.0	 16
625	 13	66.3	10.3	 16
626	 13	57.3	10.2	 16
627	 13	63.5	12.8	 16
628	 13	73.0	143.8	 16
629	 13	74.5	17.8	 16
630	 13	478.3	83.6	 16
631	 13	727.0	144.0	 16
632	 13	103.0	14.7	 16
633	 13	154.5	30.2	 16
634	 13	565.5	54.2	 16
635	 13	181.0	30.3	 16
636	 13	215.5	42.4	 16
637	 13	55.0	13.3	 16
638	 13	229.3	50.4	 16
639	 13	103.3	31.0	 16
640	 13	109.3	27.5	 16
641	 13	142.8	21.3	 16
642	 13	137.0	20.0	 16
643	 13	102.5	20.2	 16
644	 13	95.3	17.6	 16
645	 13	141.5	39.3	 16
646	 13	85.3	15.0	 16
647	 13	174.3	45.4	 16
648	 13	68.5	13.1	 16
649	 13	55.3	11.2	 16
650	 13	86.5	24.0	 16
651	 13	69.3	11.2	 16
652	 13	238.3	44.6	 16
653	 13	82.3	19.2	 16
654	 13	73.3	13.5	 16
655	 13	70.5	12.8	 16
656	 13	58.3	15.1	 16
657	 13	66.0	10.6	 20
658	 13	338.0	40.5	 16
659	 13	381.3	56.6	 16
660	 13	792.0	73.8	 16
661	 13	161.5	26.4	 16
662	 13	115.8	18.8	 16
663	 13	291.8	37.2	 16
664	 13	618.8	86.9	 16
665	 13	123.0	15.4	 16
666	 13	730.3	102.6	 16
667	 13	54.0	10.4	 16
668	 13	253.3	23.8	 16
669	 13	67.0	10.5	 16
670	 13	84.3	11.9	 16
671	 13	65.8	10.3	 16
672	 13	100.8	28.1	 16
673	 13	101.8	13.9	 16
674	 13	63.0	14.5	 16
675	 13	53.3	8.3	 16
676	 13	135.8	43.7	 16
677	 13	113.3	14.8	 16
678	 13	74.0	12.5	 16
679	 13	104.0	24.7	 16
680	 13	412.5	37.2	 16
681	 13	77.3	10.0	 16
682	 13	117.3	15.3	 16
683	 13	92.5	16.3	 16
684	 13	149.3	20.4	 16
685	 13	107.0	20.4	 16
686	 13	61.8	10.0	 16
687	 13	68.3	14.4	 16
688	 13	75.8	14.2	 16
689	 13	456.5	53.8	 16
690	 13	95.3	19.9	 16
691	 13	255.8	52.2	 16
692	 13	270.0	19.0	 16
693	 13	339.8	36.3	 16
694	 13	92.8	15.7	 16
695	 13	90.5	15.6	 16
696	 13	154.3	24.8	 16
697	 13	75.5	11.6	 16
698	 13	1075.0	122.8	 16
699	 13	233.0	37.9	 16
700	 13	142.8	20.6	 16
701	 13	158.0	19.1	 16
702	 13	1149.5	130.2	 16
703	 13	172.0	23.5	 16
704	 13	151.5	21.3	 16
705	 13	107.3	17.3	 16
706	 13	121.5	24.3	 16
707	 13	354.8	37.9	 16
708	 13	182.3	14.7	 16
709	 13	131.8	18.6	 16
710	 13	459.5	54.9	 16
711	 13	113.3	12.8	 16
  0	 14	8488.8	1127.0	 16
  1	 14	197.5	24.5	 16
  2	 14	78.0	9.5	 16
  3	 14	63.8	9.9	 16
  4	 14	107.3	16.4	 16
  5	 14	79.3	15.1	 16
  6	 14	76.0	18.5	 16
  7	 14	78.3	14.3	 16
  8	 14	251.8	38.6	 16
  9	 14	126.8	18.2	 16
 10	 14	67.5	13.4	 16
 11	 14	84.5	15.7	 16
 12	 14	71.5	15.9	 16
 13	 14	69.0	10.0	 16
 14	 14	60.3	10.9	 16
 15	 14	227.5	37.3	 16
 16	 14	203.0	44.5	 16
 17	 14	81.5	15.4	 16
 18	 14	74.3	68.6	 16
 19	 14	63.3	10.5	 16
 20	 14	81.8	18.1	 16
 21	 14	86.3	11.0	 16
 22	 14	67.5	13.9	 16
 23	 14	59.0	7.7	 16
 24	 14	71.0	13.0	 16
 25	 14	69.3	12.3	 16
 26	 14	59.3	14.1	 16
 27	 14	95.3	14.7	 16
 28	 14	55.0	10.2	 16
 29	 14	67.8	9.0	 16
 30	 14	58.5	8.7	 16
 31	 14	77.0	14.2	 16
 32	 14	73.0	12.0	 16
 33	 14	64.3	10.3	 16
 34	 14	72.5	10.0	 16
 35	 14	64.0	9.7	 16
 36	 14	84.5	14.7	 16
 37	 14	109.0	24.4	 16
 38	 14	68.5	16.0	 16
 39	 14	112.8	25.4	 16
 40	 14	80.3	16.5	 16
 41	 14	173.3	29.1	 16
 42	 14	66.3	11.2	 16
 43	 14	73.5	9.4	 16
 44	 14	60.0	14.0	 16
 45	 14	168.0	22.3	 16
 46	 14	173.3	27.6	 16
 47	 14	676.0	56.5	 16
 48	 14	164.5	26.1	 16
 49	 14	70.3	10.6	 16
 50	 14	79.5	14.6	 16
 51	 14	243.8	28.4	 16
 52	 14	104.5	26.1	 16
 53	 14	57.5	11.2	 16
 54	 14	82.8	36.2	 16
 55	 14	68.0	11.8	 16
 56	 14	55.0	8.3	 16
 57	 14	61.3	9.8	 16
 58	 14	61.3	10.2	 16
 59	 14	62.5	10.3	 16
 60	 14	76.0	10.0	 16
 61	 14	71.0	12.3	 16
 62	 14	136.3	22.1	 16
 63	 14	135.8	27.2	 16
 64	 14	171.5	38.9	 16
 65	 14	62.5	10.4	 16
 66	 14	79.0	10.4	 16
 67	 14	91.0	17.1	 16
 68	 14	74.0	11.5	 16
 69	 14	59.8	10.5	 16
 70	 14	57.3	7.6	 16
 71	 14	69.5	11.1	 16
 72	 14	60.0	7.2	 16
 73	 14	61.8	13.3	 16
 74	 14	60.3	10.3	 16
 75	 14	75.5	24.9	 16
 76	 14	72.0	12.8	 16
 77	 14	252.0	42.2	 16
 78	 14	61.5	10.0	 16
 79	 14	62.3	12.9	 16
 80	 14	84.3	13.7	 16
 81	 14	68.8	10.9	 16
 82	 14	72.3	10.9	 16
 83	 14	70.0	12.5	 16
 84	 14	58.0	8.0	 16
 85	 14	58.8	11.2	 16
 86	 14	105.3	18.7	 16
 87	 14	68.5	32.2	 16
 88	 14	250.8	30.4	 20
 89	 14	385.0	28.9	 16
 90	 14	85.3	12.5	 16
 91	 14	164.3	16.6	 16
 92	 14	70.0	12.4	 16
 93	 14	77.3	15.1	 16
 94	 14	173.3	27.2	 16
 95	 14	70.8	13.7	 16
 96	 14	58.5	13.0	 16
 97	 14	52.5	8.4	 16
 98	 14	57.0	11.5	 16
 99	 14	61.3	9.8	 16
100	 14	71.0	13.5	 16
101	 14	118.5	19.2	 16
102	 14	65.8	8.6	 16
103	 14	71.0	13.7	 16
104	 14	56.0	8.6	 16
105	 14	60.3	10.4	 16
106	 14	101.5	16.4	 16
107	 14	68.3	11.5	 16
108	 14	92.3	60.0	 16
109	 14	66.0	9.7	 16
110	 14	76.5	15.8	 16
111	 14	85.8	13.6	 16
112	 14	107.0	19.2	 16
113	 14	97.3	26.6	 16
114	 14	88.0	18.3	 16
115	 14	86.3	21.8	 16
116	 14	80.5	10.8	 16
117	 14	74.8	164.2	 16
118	 14	66.5	11.7	 16
119	 14	112.8	14.5	 16
120	 14	134.5	20.3	 16
121	 14	82.0	8.7	 16
122	 14	59.8	12.8	 16
123	 14	92.8	21.9	 16
124	 14	79.0	13.5	 16
125	 14	85.8	17.0	 16
126	 14	100.5	18.4	 16
127	 14	83.0	18.8	 16
128	 14	74.0	11.1	 16
129	 14	123.5	20.7	 16
130	 14	79.5	13.0	 16
131	 14	80.3	9.9	 16
132	 14	62.3	11.2	 16
133	 14	72.3	12.7	 16
134	 14	171.5	32.8	 16
135	 14	87.3	12.7	 16
136	 14	78.0	12.9	 16
137	 14	54.3	10.9	 16
138	 14	270.5	39.1	 16
139	 14	93.5	24.7	 16
140	 14	59.8	10.2	 16
141	 14	81.3	87.8	 16
142	 14	52.3	11.0	 16
143	 14	78.3	13.1	 16
144	 14	74.3	12.4	 16
145	 14	138.0	18.5	 16
146	 14	352.0	61.2	 16
147	 14	57.5	8.9	 16
148	 14	145.3	25.3	 16
149	 14	97.3	21.1	 16
150	 14	105.5	18.1	 16
151	 14	56.3	14.1	 16
152	 14	57.5	10.4	 16
153	 14	910.5	95.6	 16
154	 14	75.5	12.2	 16
155	 14	58.5	9.3	 16
156	 14	77.8	19.1	 16
157	 14	80.8	10.9	 16
158	 14	177.5	24.3	 16
159	 14	107.3	14.9	 16
160	 14	58.5	13.0	 16
161	 14	67.8	8.2	 16
162	 14	78.3	16.4	 16
163	 14	68.3	9.6	 16
164	 14	80.3	12.0	 16
165	 14	63.0	9.5	 16
166	 14	74.3	10.9	 16
167	 14	82.0	16.4	 16
168	 14	67.5	12.9	 16
169	 14	60.8	10.2	 16
170	 14	58.0	11.5	 16
171	 14	64.3	26.2	 16
172	 14	74.0	14.2	 16
173	 14	58.5	13.1	 16
174	 14	66.3	17.8	 16
175	 14	69.8	11.7	 16
176	 14	78.0	18.0	 16
177	 14	92.5	18.9	 16
178	 14	72.3	15.9	 16
179	 14	68.0	13.6	 16
180	 14	105.5	15.1	 16
181	 14	151.0	35.7	 16
182	 14	160.0	17.4	 16
183	 14	52.5	10.0	 16
184	 14	75.0	13.6	 16
185	 14	63.5	17.1	 16
186	 14	120.5	14.5	 16
187	 14	75.3	15.3	 16
188	 14	93.3	18.2	 16
189	 14	99.8	18.3	 16
190	 14	71.0	12.7	 16
191	 14	72.0	7.1	 16
192	 14	71.0	10.1	 16
193	 14	83.3	14.7	 16
194	 14	79.0	14.8	 16
195	 14	82.8	16.8	 16
196	 14	113.3	14.0	 16
197	 14	58.3	7.6	 16
198	 14	84.0	13.2	 16
199	 14	88.0	14.4	 16
200	 14	96.0	13.4	 12
201	 14	57.0	13.2	 16
202	 14	65.8	10.9	 16
203	 14	69.5	10.9	 16
204	 14	58.0	13.6	 16
205	 14	64.3	16.0	 16
206	 14	52.0	10.3	 16
207	 14	62.5	13.5	 16
208	 14	58.3	12.8	 16
209	 14	65.8	42.1	 16
210	 14	59.5	7.5	 16
211	 14	65.0	11.4	 16
212	 14	162.5	34.9	 16
213	 14	182.0	241.9	 16
214	 14	61.0	11.3	 16
215	 14	62.0	9.6	 16
216	 14	62.8	9.6	 16
217	 14	69.0	14.7	 16
218	 14	64.5	9.7	 16
219	 14	68.0	11.8	 16
220	 14	82.0	11.0	 16
221	 14	104.8	22.0	 16
222	 14	103.5	19.2	 16
223	 14	213.0	30.9	 16
224	 14	76.3	30.0	 16
225	 14	83.5	16.8	 16
226	 14	85.5	16.5	 16
227	 14	67.8	9.2	 16
228	 14	89.5	15.1	 16
229	 14	76.3	14.2	 16
230	 14	62.3	15.7	 16
231	 14	172.0	24.7	 20
232	 14	162.8	19.4	 16
233	 14	262.0	30.4	 16
234	 14	111.3	21.9	 16
235	 14	329.3	21.8	 16
236	 14	221.0	31.4	 16
237	 14	2657.5	228.8	 16
238	 14	2623.0	296.5	 16
239	 14	383.5	62.5	 16
240	 14	95.3	18.5	 16
241	 14	289.3	40.4	 16
242	 14	251.5	40.6	 16
243	 14	75.3	10.3	 16
244	 14	67.3	14.2	 16
245	 14	55.5	10.5	 16
246	 14	65.3	11.1	 16
247	 14	59.8	12.2	 16
248	 14	59.3	11.3	 16
249	 14	65.3	9.5	 16
250	 14	55.8	10.1	 16
251	 14	67.3	17.7	 16
252	 14	63.3	12.2	 16
253	 14	72.0	13.4	 16
254	 14	64.3	11.3	 16
255	 14	67.8	10.8	 16
256	 14	110.5	17.0	 16
257	 14	70.0	11.6	 16
258	 14	81.3	13.5	 16
259	 14	72.3	12.6	 16
260	 14	53.3	7.9	 16
261	 14	56.5	12.0	 16
262	 14	62.8	12.1	 16
263	 14	95.3	14.3	 16
264	 14	74.5	15.2	 16
265	 14	85.3	14.4	 16
266	 14	69.8	16.0	 16
267	 14	195.0	35.8	 16
268	 14	64.3	15.9	 16
269	 14	127.5	17.3	 16
270	 14	84.3	12.6	 16
271	 14	64.3	9.6	 16
272	 14	72.5	12.2	 16
273	 14	70.5	27.3	 16
274	 14	65.3	16.2	 16
275	 14	58.5	7.6	 16
276	 14	88.0	14.5	 16
277	 14	64.3	10.4	 16
278	 14	55.3	10.4	 16
279	 14	72.3	23.5	 16
280	 14	60.8	12.1	 16
281	 14	60.0	11.0	 16
282	 14	101.3	24.1	 16
283	 14	111.5	19.6	 16
284	 14	55.3	9.7	 16
285	 14	70.8	13.3	 16
286	 14	173.5	21.5	 16
287	 14	63.3	9.0	 16
288	 14	54.8	16.9	 16
289	 14	75.0	9.0	 16
290	 14	63.3	15.8	 16
291	 14	55.8	11.0	 16
292	 14	69.0	11.9	 16
293	 14	74.0	13.7	 16
294	 14	77.8	18.4	 16
295	 14	87.8	8.4	 16
296	 14	127.3	26.0	 16
297	 14	70.8	16.0	 16
298	 14	79.0	25.3	 16
299	 14	123.3	23.6	 16
300	 14	77.3	14.8	 16
301	 14	112.8	17.7	 16
302	 14	70.5	13.6	 16
303	 14	98.0	34.7	 16
304	 14	93.5	9.7	 16
305	 14	63.0	10.5	 16
306	 14	75.8	13.6	 16
307	 14	102.3	14.1	 16
308	 14	69.8	15.7	 16
309	 14	135.5	13.8	 16
310	 14	126.0	18.2	 16
311	 14	108.3	16.8	 16
312	 14	60.0	13.0	 16
313	 14	68.0	10.2	 16
314	 14	68.3	9.9	 16
315	 14	64.0	29.4	 16
316	 14	86.0	21.9	 16
317	 14	86.3	18.6	 16
318	 14	65.0	14.0	 16
319	 14	76.3	13.8	 16
320	 14	76.3	9.6	 16
321	 14	90.3	16.1	 16
322	 14	89.8	16.6	 16
323	 14	136.5	18.6	 16
324	 14	74.0	9.7	 16
325	 14	306.0	32.3	 16
326	 14	92.8	14.7	 16
327	 14	75.0	12.0	 16
328	 14	78.8	15.7	 16
329	 14	80.3	12.3	 16
330	 14	74.5	13.6	 16
331	 14	111.8	21.2	 16
332	 14	78.8	13.8	 16
333	 14	77.3	12.3	 16
334	 14	63.8	18.9	 16
335	 14	56.3	7.8	 16
336	 14	57.0	9.9	 16
337	 14	62.3	12.6	 16
338	 14	65.0	9.9	 16
339	 14	207.3	21.8	 16
340	 14	136.3	24.9	 16
341	 14	107.0	18.0	 16
342	 14	55.3	8.8	 16
343	 14	66.5	34.4	 16
344	 14	60.0	16.9	 16
345	 14	54.5	12.0	 16
346	 14	70.0	11.7	 16
347	 14	63.3	16.9	 16
348	 14	65.0	13.0	 16
349	 14	83.3	18.6	 16
350	 14	148.0	25.9	 16
351	 14	106.8	12.7	 16
352	 14	71.8	14.3	 16
353	 14	143.3	19.5	 16
354	 14	69.0	11.8	 16
355	 14	116.5	20.7	 16
356	 14	190.0	28.7	 16
357	 14	166.0	29.1	 16
358	 14	115.0	24.6	 16
359	 14	67.0	13.9	 16
360	 14	71.0	45.2	 16
361	 14	144.8	24.0	 16
362	 14	81.8	15.8	 16
363	 14	60.0	10.8	 16
364	 14	59.3	9.5	 16
365	 14	56.0	6.8	 16
366	 14	70.3	11.8	 16
367	 14	95.0	16.5	 16
368	 14	63.0	9.3	 16
369	 14	80.8	17.2	 16
370	 14	149.5	26.8	 16
371	 14	147.5	14.6	 16
372	 14	243.5	21.8	 16
373	 14	108.5	21.6	 20
374	 14	49.3	8.9	 16
375	 14	94.3	16.5	 16
376	 14	74.3	20.4	 16
377	 14	214.8	26.5	 16
378	 14	87.3	39.2	 16
379	 14	122.5	17.6	 16
380	 14	121.0	22.0	 16
381	 14	66.0	13.1	 16
382	 14	85.5	39.5	 16
383	 14	94.0	19.4	 16
384	 14	103.3	15.6	 16
385	 14	61.8	13.6	 16
386	 14	62.3	8.8	 16
387	 14	76.3	11.2	 16
388	 14	72.8	10.6	 16
389	 14	67.5	13.5	 16
390	 14	70.5	11.1	 16
391	 14	69.5	41.1	 16
392	 14	63.0	10.1	 16
393	 14	66.3	14.8	 16
394	 14	169.5	17.8	 16
395	 14	67.5	10.6	 16
396	 14	115.3	22.0	 16
397	 14	209.5	21.8	 16
398	 14	107.3	17.5	 16
399	 14	80.0	15.5	 16
400	 14	90.5	15.1	 16
401	 14	81.8	15.5	 16
402	 14	84.3	18.0	 16
403	 14	63.0	13.7	 16
404	 14	86.5	18.2	 16
405	 14	57.8	11.2	 16
406	 14	116.0	20.4	 16
407	 14	145.8	17.5	 16
408	 14	192.5	204.2	 16
409	 14	62.3	9.6	 16
410	 14	62.8	13.9	 16
411	 14	100.8	28.4	 16
412	 14	92.8	21.7	 16
413	 14	123.0	99.3	 16
414	 14	64.5	12.2	 16
415	 14	111.5	18.5	 16
416	 14	55.5	14.5	 16
417	 14	76.0	13.7	 16
418	 14	100.5	18.2	 16
419	 14	79.3	8.7	 16
420	 14	66.3	10.8	 16
421	 14	59.3	9.0	 16
422	 14	69.0	15.0	 16
423	 14	76.0	12.4	 16
424	 14	141.5	113.3	 16
425	 14	77.5	12.1	 16
426	 14	68.5	14.5	 16
427	 14	68.0	9.2	 16
428	 14	86.3	11.8	 16
429	 14	98.0	17.3	 16
430	 14	95.5	45.1	 16
431	 14	113.8	21.5	 16
432	 14	101.8	19.6	 16
433	 14	107.0	22.7	 16
434	 14	165.3	88.1	 16
435	 14	73.3	14.1	 16
436	 14	65.8	9.8	 16
437	 14	73.0	16.7	 16
438	 14	171.8	18.3	 16
439	 14	84.3	20.3	 16
440	 14	60.5	13.0	 16
441	 14	67.3	13.4	 16
442	 14	104.5	22.0	 16
443	 14	61.8	10.2	 16
444	 14	64.0	14.3	 16
445	 14	58.5	11.0	 16
446	 14	68.8	10.5	 16
447	 14	91.0	29.0	 16
448	 14	60.5	16.3	 16
449	 14	57.3	12.1	 16
450	 14	61.3	12.8	 16
451	 14	64.0	12.1	 16
452	 14	71.8	16.8	 16
453	 14	63.5	11.2	 16
454	 14	75.5	11.5	 16
455	 14	67.0	10.7	 16
456	 14	59.5	13.0	 16
457	 14	63.3	11.2	 16
458	 14	92.0	15.0	 16
459	 14	71.0	14.8	 16
460	 14	97.8	13.7	 16
461	 14	84.5	19.7	 16
462	 14	109.3	25.2	 16
463	 14	63.5	13.8	 16
464	 14	60.5	11.5	 16
465	 14	93.3	17.5	 16
466	 14	67.8	10.8	 16
467	 14	65.0	12.7	 16
468	 14	99.0	61.9	 16
469	 14	62.3	57.0	 16
470	 14	78.3	11.6	 16
471	 14	81.3	15.2	 16
472	 14	59.3	5.2	 16
473	 14	69.8	10.9	 16
474	 14	98.0	16.2	 16
475	 14	65.5	9.2	 16
476	 14	61.3	10.9	 16
477	 14	58.5	12.7	 16
478	 14	56.0	8.2	 16
479	 14	69.5	11.5	 16
480	 14	4726.3	891.9	 16
481	 14	88.0	22.2	 16
482	 14	55.8	8.9	 16
483	 14	53.3	7.5	 16
484	 14	52.5	10.2	 16
485	 14	68.0	10.6	 16
486	 14	72.3	13.6	 16
487	 14	69.0	17.3	 16
488	 14	69.3	9.7	 16
489	 14	70.0	13.0	 16
490	 14	56.5	8.9	 16
491	 14	68.3	12.5	 16
492	 14	58.8	10.7	 16
493	 14	62.3	10.0	 16
494	 14	72.3	14.4	 16
495	 14	122.8	21.4	 16
496	 14	90.3	16.2	 16
497	 14	71.0	14.2	 16
498	 14	60.3	12.2	 16
499	 14	128.8	20.5	 16
500	 14	59.0	9.3	 16
501	 14	62.5	13.0	 16
502	 14	63.3	13.3	 16
503	 14	58.3	9.6	 16
504	 14	73.0	12.8	 16
505	 14	57.8	11.2	 16
506	 14	71.8	11.7	 16
507	 14	73.3	13.8	 16
508	 14	92.5	12.2	 16
509	 14	84.3	11.5	 16
510	 14	87.0	11.4	 16
511	 14	120.5	20.5	 16
512	 14	85.3	15.9	 16
513	 14	80.3	13.7	 16
514	 14	118.3	15.1	 16
515	 14	94.3	20.2	 20
516	 14	152.0	32.9	 16
517	 14	75.8	14.6	 16
518	 14	74.5	13.7	 16
519	 14	84.8	12.7	 16
520	 14	73.8	15.4	 16
521	 14	75.3	14.8	 16
522	 14	140.8	25.2	 16
523	 14	117.5	16.1	 16
524	 14	127.0	19.4	 16
525	 14	55.8	13.8	 16
526	 14	75.3	9.9	 16
527	 14	64.3	10.0	 16
528	 14	133.3	15.8	 16
529	 14	135.5	21.0	 16
530	 14	59.3	12.5	 16
531	 14	64.3	13.3	 16
532	 14	75.0	15.8	 16
533	 14	58.5	10.5	 16
534	 14	52.8	10.8	 16
535	 14	74.5	72.0	 16
536	 14	75.8	12.4	 16
537	 14	127.8	22.3	 16
538	 14	139.3	22.6	 16
539	 14	130.0	17.5	 16
540	 14	110.3	20.6	 16
541	 14	168.3	26.9	 16
542	 14	49.3	10.6	 16
543	 14	75.0	12.8	 16
544	 14	80.8	17.0	 16
545	 14	64.3	13.8	 16
546	 14	68.5	20.4	 16
547	 14	310.0	28.2	 16
548	 14	288.8	53.6	 16
549	 14	181.0	28.1	 16
550	 14	69.0	14.8	 16
551	 14	108.3	23.4	 16
552	 14	94.5	20.8	 16
553	 14	342.0	58.9	 16
554	 14	57.3	10.1	 16
555	 14	52.0	10.5	 16
556	 14	84.5	12.5	 16
557	 14	79.5	17.3	 16
558	 14	67.0	14.8	 16
559	 14	157.3	22.0	 16
560	 14	91.3	15.6	 16
561	 14	65.0	15.2	 16
562	 14	73.0	13.0	 16
563	 14	105.8	17.2	 16
564	 14	127.3	22.7	 16
565	 14	66.5	10.6	 16
566	 14	80.8	14.0	 16
567	 14	341.0	35.0	 16
568	 14	94.8	14.8	 16
569	 14	98.0	20.9	 16
570	 14	62.8	11.5	 16
571	 14	74.3	22.6	 16
572	 14	65.8	15.9	 16
573	 14	73.0	9.5	 16
574	 14	98.5	16.2	 16
575	 14	139.3	17.5	 16
576	 14	95.3	15.4	 16
577	 14	66.3	11.4	 16
578	 14	320.5	35.8	 16
579	 14	268.5	31.3	 16
580	 14	112.0	47.4	 16
581	 14	70.0	8.9	 16
582	 14	125.0	23.4	 16
583	 14	66.3	14.6	 16
584	 14	109.3	19.8	 16
585	 14	104.0	20.5	 16
586	 14	94.3	15.2	 16
587	 14	93.5	15.3	 16
588	 14	62.0	8.8	 16
589	 14	59.5	18.5	 16
590	 14	53.3	9.1	 16
591	 14	92.3	15.7	 16
592	 14	135.8	23.8	 16
593	 14	95.3	52.3	 16
594	 14	118.3	19.7	 16
595	 14	76.3	11.5	 16
596	 14	69.0	13.2	 16
597	 14	148.8	25.8	 16
598	 14	69.3	12.1	 16
599	 14	83.3	14.5	 16
600	 14	91.5	15.9	 16
601	 14	131.8	18.5	 12
602	 14	150.5	24.8	 16
603	 14	61.3	12.4	 16
604	 14	112.5	17.3	 16
605	 14	74.5	12.6	 16
606	 14	59.5	13.8	 16
607	 14	55.0	7.7	 16
608	 14	54.3	9.5	 16
609	 14	62.3	11.3	 16
610	 14	58.5	7.9	 16
611	 14	59.0	11.0	 16
612	 14	68.5	12.7	 16
613	 14	97.3	13.4	 16
614	 14	80.3	18.3	 16
615	 14	91.5	12.4	 16
616	 14	159.8	25.8	 16
617	 14	148.5	16.8	 16
618	 14	97.3	14.6	 16
619	 14	127.0	30.8	 16
620	 14	72.8	8.9	 16
621	 14	65.3	17.0	 16
622	 14	72.3	16.7	 16
623	 14	79.3	13.2	 16
624	 14	67.0	12.4	 16
625	 14	63.3	14.0	 16
626	 14	57.5	13.2	 16
627	 14	65.0	14.6	 16
628	 14	65.3	14.1	 16
629	 14	58.0	15.3	 16
630	 14	230.8	30.8	 16
631	 14	180.0	29.9	 16
632	 14	86.0	13.3	 16
633	 14	187.8	29.7	 16
634	 14	496.0	50.2	 16
635	 14	94.3	16.2	 16
636	 14	86.3	15.9	 16
637	 14	67.0	10.8	 16
638	 14	112.3	18.0	 16
639	 14	83.3	11.8	 16
640	 14	67.3	17.5	 16
641	 14	100.3	19.6	 16
642	 14	110.8	22.6	 16
643	 14	116.3	16.7	 16
644	 14	133.3	19.0	 16
645	 14	110.3	25.5	 16
646	 14	87.3	13.6	 16
647	 14	76.3	14.6	 16
648	 14	101.5	48.1	 16
649	 14	61.8	9.5	 16
650	 14	56.3	9.9	 16
651	 14	61.3	7.5	 16
652	 14	100.0	12.3	 16
653	 14	74.0	11.0	 16
654	 14	63.0	10.9	 16
655	 14	81.3	38.5	 16
656	 14	67.0	12.4	 16
657	 14	77.0	12.9	 16
658	 14	149.5	23.1	 20
659	 14	118.0	19.4	 16
660	 14	914.5	100.8	 16
661	 14	289.0	53.1	 16
662	 14	179.5	22.6	 16
663	 14	136.3	19.5	 16
664	 14	144.3	24.9	 16
665	 14	90.0	15.2	 16
666	 14	232.0	41.2	 16
667	 14	70.5	30.2	 16
668	 14	102.5	26.8	 16
669	 14	78.5	13.3	 16
670	 14	82.8	19.3	 16
671	 14	67.0	13.8	 16
672	 14	70.8	14.2	 16
673	 14	70.0	14.8	 16
674	 14	67.3	13.7	 16
675	 14	79.3	16.7	 16
676	 14	72.8	18.7	 16
677	 14	77.0	14.1	 16
678	 14	69.5	12.9	 16
679	 14	79.5	13.1	 16
680	 14	194.5	23.4	 16
681	 14	59.5	12.9	 16
682	 14	86.5	9.0	 16
683	 14	110.0	18.7	 16
684	 14	85.0	16.9	 16
685	 14	86.8	13.2	 16
686	 14	73.0	13.5	 16
687	 14	78.5	12.3	 16
688	 14	73.0	13.5	 16
689	 14	135.5	29.1	 16
690	 14	94.0	12.8	 16
691	 14	173.0	31.2	 16
692	 14	141.0	20.6	 16
693	 14	205.0	33.3	 16
694	 14	64.3	11.8	 16
695	 14	69.8	13.1	 16
696	 14	92.5	40.9	 16
697	 14	123.5	18.8	 16
698	 14	316.3	78.8	 16
699	 14	344.8	62.8	 16
700	 14	104.8	16.0	 16
701	 14	141.5	26.2	 16
702	 14	524.5	59.2	 16
703	 14	88.0	15.1	 16
704	 14	182.5	28.4	 16
705	 14	167.3	28.1	 16
706	 14	170.8	24.3	 16
707	 14	227.5	33.4	 16
708	 14	110.3	14.1	 16
709	 14	87.0	13.7	 16
710	 14	135.5	26.8	 16
711	 14	8409.5	1031.4	 16
  0	 15	100.8	17.2	 16
  1	 15	98.3	18.0	 16
  2	 15	72.8	11.7	 16
  3	 15	76.3	17.8	 16
  4	 15	123.5	14.9	 16
  5	 15	78.5	14.0	 16
  6	 15	119.5	17.1	 16
  7	 15	214.5	29.0	 16
  8	 15	77.0	12.2	 16
  9	 15	104.8	19.1	 16
 10	 15	85.5	17.8	 16
 11	 15	82.8	16.5	 16
 12	 15	256.0	30.1	 16
 13	 15	73.3	13.7	 16
 14	 15	78.0	11.6	 16
 15	 15	95.8	14.3	 16
 16	 15	239.0	23.3	 16
 17	 15	185.3	27.8	 16
 18	 15	135.5	23.4	 16
 19	 15	293.5	33.4	 16
 20	 15	128.0	15.0	 16
 21	 15	75.8	16.5	 16
 22	 15	61.0	21.3	 16
 23	 15	124.5	19.0	 16
 24	 15	321.5	33.3	 16
 25	 15	124.0	27.2	 16
 26	 15	95.5	18.1	 16
 27	 15	60.5	10.7	 16
 28	 15	498.5	58.9	 16
 29	 15	495.0	70.1	 16
 30	 15	95.0	18.2	 16
 31	 15	211.0	23.6	 16
 32	 15	66.0	13.3	 16
 33	 15	758.3	84.3	 16
 34	 15	109.0	29.0	 16
 35	 15	86.8	22.0	 16
 36	 15	69.0	11.2	 16
 37	 15	91.5	19.1	 16
 38	 15	79.8	19.1	 16
 39	 15	79.3	13.3	 16
 40	 15	70.3	11.0	 16
 41	 15	170.5	27.1	 16
 42	 15	78.0	14.7	 16
 43	 15	114.8	18.7	 16
 44	 15	168.5	29.2	 16
 45	 15	110.3	16.2	 16
 46	 15	101.0	18.6	 16
 47	 15	77.3	14.3	 16
 48	 15	876.8	66.6	 16
 49	 15	260.3	36.6	 16
 50	 15	328.0	36.1	 16
 51	 15	189.8	33.1	 16
 52	 15	152.8	21.8	 16
 53	 15	184.5	23.8	 16
 54	 15	68.5	12.5	 16
 55	 15	82.3	10.7	 16
 56	 15	108.3	105.0	 16
 57	 15	98.5	17.6	 16
 58	 15	783.5	117.8	 16
 59	 15	296.0	43.6	 16
 60	 15	72.0	13.2	 16
 61	 15	145.8	24.3	 16
 62	 15	209.3	25.9	 16
 63	 15	65.0	10.2	 16
 64	 15	141.0	14.3	 16
 65	 15	105.5	16.8	 16
 66	 15	66.0	10.7	 16
 67	 15	99.0	20.3	 16
 68	 15	292.3	35.9	 16
 69	 15	129.3	25.1	 16
 70	 15	117.0	28.1	 16
 71	 15	104.8	18.5	 16
 72	 15	108.0	23.8	 16
 73	 15	207.0	32.5	 16
 74	 15	707.5	61.7	 16
 75	 15	63.8	11.7	 16
 76	 15	526.8	74.5	 16
 77	 15	87.5	14.1	 16
 78	 15	66.3	11.7	 16
 79	 15	157.5	22.1	 16
 80	 15	56.5	9.7	 16
 81	 15	162.3	27.8	 16
 82	 15	71.8	26.9	 16
 83	 15	82.8	15.5	 16
 84	 15	81.5	15.6	 16
 85	 15	266.8	46.8	 16
 86	 15	130.8	17.7	 16
 87	 15	96.0	15.1	 16
 88	 15	85.0	21.2	 16
 89	 15	196.5	35.7	 20
 90	 15	114.3	17.1	 16
 91	 15	187.5	24.6	 16
 92	 15	119.0	15.1	 16
 93	 15	134.8	14.7	 16
 94	 15	467.3	69.0	 16
 95	 15	321.5	40.7	 16
 96	 15	194.3	26.0	 16
 97	 15	63.0	9.0	 16
 98	 15	97.5	17.4	 16
 99	 15	82.8	14.2	 16
100	 15	73.5	11.8	 16
101	 15	2579.5	336.6	 16
102	 15	154.5	25.8	 16
103	 15	76.3	8.2	 16
104	 15	1157.5	148.2	 16
105	 15	229.3	30.7	 16
106	 15	83.3	13.1	 16
107	 15	58.5	11.6	 16
108	 15	131.8	24.6	 16
109	 15	114.3	18.1	 16
110	 15	76.5	17.3	 16
111	 15	129.0	20.4	 16
112	 15	134.5	26.0	 16
113	 15	93.3	14.1	 16
114	 15	199.0	22.8	 16
115	 15	242.0	28.1	 16
116	 15	199.3	36.8	 16
117	 15	100.0	69.2	 16
118	 15	230.0	33.0	 16
119	 15	62.5	10.9	 16
120	 15	92.3	12.8	 16
121	 15	173.8	29.3	 16
122	 15	96.0	65.3	 16
123	 15	111.3	16.4	 16
124	 15	127.3	21.1	 16
125	 15	74.3	13.7	 16
126	 15	187.0	24.2	 16
127	 15	73.5	10.6	 16
128	 15	83.3	22.4	 16
129	 15	54.0	8.2	 16
130	 15	67.3	11.9	 16
131	 15	316.5	43.6	 16
132	 15	116.0	24.2	 16
133	 15	72.5	13.3	 16
134	 15	107.5	23.0	 16
135	 15	68.3	15.2	 16
136	 15	71.3	20.2	 16
137	 15	829.3	118.5	 16
138	 15	638.0	84.9	 16
139	 15	126.3	17.0	 16
140	 15	128.3	45.7	 16
141	 15	81.5	14.9	 16
142	 15	64.5	11.8	 16
143	 15	113.0	13.3	 16
144	 15	340.0	36.4	 16
145	 15	226.5	30.9	 16
146	 15	161.0	27.6	 16
147	 15	79.3	12.4	 16
148	 15	290.5	32.5	 16
149	 15	103.0	8.7	 16
150	 15	146.5	18.0	 16
151	 15	278.5	34.6	 16
152	 15	113.8	12.8	 16
153	 15	95.8	12.5	 16
154	 15	108.5	20.8	 16
155	 15	65.5	16.7	 16
156	 15	109.5	33.0	 16
157	 15	178.5	71.2	 16
158	 15	132.3	20.1	 16
159	 15	187.5	27.1	 16
160	 15	245.5	37.9	 16
161	 15	573.8	57.6	 16
162	 15	87.0	14.4	 16
163	 15	110.3	18.2	 16
164	 15	51.8	10.1	 16
165	 15	65.3	10.4	 16
166	 15	73.3	12.4	 16
167	 15	107.0	16.6	 16
168	 15	91.0	19.8	 16
169	 15	102.5	17.0	 16
170	 15	69.5	10.0	 16
171	 15	81.5	11.5	 16
172	 15	84.5	17.1	 16
173	 15	90.3	15.6	 16
174	 15	50.0	11.6	 16
175	 15	73.0	11.8	 16
176	 15	84.3	14.4	 16
177	 15	120.8	16.9	 16
178	 15	356.0	41.8	 16
179	 15	104.5	15.4	 16
180	 15	86.8	14.8	 16
181	 15	66.8	12.0	 16
182	 15	346.3	38.8	 16
183	 15	88.5	16.2	 16
184	 15	100.0	15.9	 16
185	 15	80.3	13.4	 16
186	 15	81.8	13.6	 16
187	 15	61.0	8.2	 16
188	 15	221.0	26.2	 16
189	 15	230.5	41.9	 16
190	 15	184.0	28.0	 16
191	 15	68.5	12.1	 16
192	 15	111.5	16.8	 16
193	 15	100.5	14.1	 16
194	 15	114.5	17.8	 16
195	 15	100.5	16.0	 16
196	 15	69.5	11.1	 16
197	 15	139.5	22.8	 16
198	 15	74.8	13.8	 16
199	 15	58.3	9.5	 16
200	 15	55.3	11.5	 16
201	 15	156.3	26.6	 16
202	 15	123.0	17.8	 16
203	 15	110.0	15.7	 16
204	 15	80.3	12.1	 16
205	 15	136.5	29.2	 16
206	 15	199.3	30.5	 16
207	 15	101.5	21.8	 16
208	 15	97.5	15.0	 16
209	 15	105.5	12.8	 16
210	 15	79.5	13.3	 16
211	 15	70.3	14.5	 16
212	 15	77.5	12.8	 16
213	 15	60.8	9.3	 16
214	 15	92.3	11.2	 16
215	 15	61.3	11.3	 16
216	 15	697.0	83.7	 16
217	 15	111.3	22.9	 16
218	 15	807.5	162.3	 16
219	 15	141.3	20.2	 16
220	 15	91.0	15.4	 16
221	 15	98.3	12.4	 16
222	 15	96.0	13.8	 16
223	 15	109.3	44.7	 16
224	 15	77.0	10.7	 16
225	 15	76.8	14.2	 16
226	 15	105.5	18.3	 16
227	 15	56.3	9.8	 16
228	 15	73.8	14.9	 16
229	 15	315.0	38.7	 16
230	 15	104.5	20.1	 16
231	 15	76.8	17.1	 16
232	 15	90.5	16.0	 20
233	 15	57.3	11.0	 16
234	 15	117.5	22.4	 16
235	 15	338.8	50.6	 16
236	 15	539.8	69.3	 16
237	 15	215.5	34.8	 16
238	 15	252.3	47.5	 16
239	 15	124.0	18.1	 16
240	 15	103.3	34.5	 16
241	 15	121.3	24.0	 16
242	 15	434.3	63.7	 16
243	 15	56.3	11.3	 16
244	 15	81.0	12.9	 16
245	 15	77.8	15.6	 16
246	 15	93.5	14.5	 16
247	 15	77.8	17.7	 16
248	 15	92.3	14.9	 16
249	 15	289.0	54.9	 16
250	 15	60.3	17.4	 16
251	 15	75.0	12.2	 16
252	 15	91.5	15.9	 16
253	 15	112.5	30.3	 16
254	 15	525.5	64.4	 16
255	 15	121.8	18.6	 16
256	 15	123.3	16.3	 16
257	 15	222.5	34.2	 16
258	 15	68.3	162.0	 16
259	 15	66.5	12.0	 16
260	 15	68.0	11.6	 16
261	 15	94.5	14.2	 16
262	 15	159.8	26.4	 16
263	 15	98.3	20.6	 16
264	 15	135.3	23.4	 16
265	 15	94.5	13.1	 16
266	 15	71.0	15.3	 16
267	 15	114.3	24.2	 16
268	 15	121.3	21.7	 16
269	 15	81.8	18.7	 16
270	 15	66.0	13.8	 16
271	 15	66.3	12.2	 16
272	 15	108.3	17.4	 16
273	 15	74.3	9.4	 16
274	 15	177.3	31.2	 16
275	 15	184.8	26.3	 16
276	 15	124.0	16.0	 16
277	 15	67.3	13.5	 16
278	 15	53.8	9.3	 16
279	 15	105.5	19.5	 16
280	 15	216.3	42.5	 16
281	 15	76.3	12.0	 16
282	 15	103.3	19.8	 16
283	 15	70.8	11.1	 16
284	 15	73.3	14.9	 16
285	 15	126.8	19.0	 16
286	 15	122.5	23.0	 16
287	 15	168.8	25.2	 16
288	 15	670.0	94.1	 16
289	 15	89.3	14.0	 16
290	 15	122.5	19.1	 16
291	 15	109.0	24.8	 16
292	 15	457.3	73.0	 16
293	 15	193.3	25.0	 16
294	 15	106.8	40.4	 16
295	 15	85.0	13.1	 16
296	 15	117.5	23.9	 16
297	 15	544.5	49.7	 16
298	 15	117.5	20.4	 16
299	 15	129.0	19.1	 16
300	 15	67.0	14.5	 16
301	 15	97.0	17.0	 16
302	 15	73.0	10.7	 16
303	 15	79.8	26.4	 16
304	 15	200.5	30.7	 16
305	 15	71.0	16.5	 16
306	 15	93.0	16.9	 16
307	 15	107.5	17.0	 16
308	 15	123.5	25.7	 16
309	 15	104.3	16.3	 16
310	 15	289.0	36.8	 16
311	 15	180.0	26.4	 16
312	 15	118.0	16.3	 16
313	 15	65.8	14.6	 16
314	 15	83.0	14.5	 16
315	 15	129.3	27.3	 16
316	 15	447.0	63.5	 16
317	 15	180.5	21.2	 16
318	 15	103.8	17.1	 16
319	 15	185.5	18.0	 16
320	 15	109.8	14.3	 16
321	 15	155.8	21.4	 16
322	 15	249.3	45.3	 16
323	 15	103.3	17.5	 16
324	 15	408.5	47.8	 16
325	 15	111.3	22.8	 16
326	 15	99.8	14.7	 16
327	 15	81.0	18.0	 16
328	 15	73.0	30.8	 16
329	 15	66.0	14.8	 16
330	 15	602.3	104.8	 16
331	 15	161.0	19.3	 16
332	 15	289.5	33.1	 16
333	 15	170.5	23.2	 16
334	 15	64.5	10.0	 16
335	 15	63.8	16.4	 16
336	 15	84.0	36.8	 16
337	 15	260.0	60.3	 16
338	 15	204.5	27.0	 16
339	 15	202.5	23.5	 16
340	 15	122.8	18.5	 16
341	 15	87.0	18.9	 16
342	 15	71.8	29.4	 16
343	 15	70.8	11.0	 16
344	 15	117.5	12.8	 16
345	 15	80.8	12.2	 16
346	 15	122.3	23.1	 16
347	 15	54.3	8.0	 16
348	 15	161.5	31.8	 16
349	 15	65.8	11.7	 16
350	 15	117.3	18.1	 16
351	 15	86.5	13.6	 16
352	 15	74.5	12.0	 16
353	 15	130.3	25.5	 16
354	 15	61.3	10.4	 16
355	 15	142.3	29.0	 16
356	 15	409.8	58.1	 16
357	 15	212.3	31.1	 16
358	 15	206.0	21.1	 16
359	 15	187.5	28.5	 16
360	 15	53.8	6.6	 16
361	 15	103.3	25.0	 16
362	 15	123.3	18.5	 16
363	 15	75.3	11.8	 16
364	 15	117.5	20.7	 16
365	 15	67.3	9.4	 16
366	 15	88.0	17.5	 16
367	 15	133.3	25.4	 16
368	 15	64.5	11.2	 16
369	 15	59.0	12.7	 16
370	 15	60.0	24.1	 16
371	 15	77.3	14.3	 16
372	 15	111.0	18.3	 16
373	 15	316.3	46.4	 16
374	 15	74.3	13.2	 20
375	 15	192.3	28.6	 16
376	 15	167.0	23.4	 16
377	 15	103.5	11.3	 16
378	 15	116.3	21.6	 16
379	 15	166.3	26.8	 16
380	 15	76.3	17.2	 16
381	 15	63.8	15.2	 16
382	 15	60.8	10.1	 16
383	 15	99.5	20.3	 16
384	 15	70.3	16.8	 16
385	 15	239.5	40.6	 16
386	 15	110.8	21.4	 16
387	 15	259.0	22.3	 16
388	 15	213.0	24.5	 16
389	 15	141.8	17.6	 16
390	 15	62.0	14.9	 16
391	 15	78.5	21.6	 16
392	 15	78.8	10.4	 16
393	 15	294.5	51.6	 16
394	 15	227.5	26.2	 16
395	 15	105.3	20.1	 16
396	 15	54.8	10.2	 16
397	 15	79.5	10.7	 16
398	 15	59.3	6.4	 16
399	 15	77.5	10.5	 16
400	 15	142.8	19.1	 16
401	 15	77.5	13.3	 16
402	 15	123.3	24.4	 16
403	 15	84.5	12.9	 16
404	 15	763.5	98.6	 16
405	 15	205.3	23.6	 16
406	 15	96.0	14.0	 16
407	 15	355.8	58.0	 16
408	 15	147.3	17.3	 16
409	 15	90.5	24.9	 16
410	 15	119.0	25.6	 16
411	 15	99.8	16.4	 16
412	 15	71.3	10.5	 16
413	 15	138.3	27.1	 16
414	 15	84.5	13.9	 16
415	 15	180.3	32.6	 16
416	 15	135.3	19.3	 16
417	 15	376.5	34.5	 16
418	 15	105.0	13.7	 16
419	 15	114.3	17.8	 16
420	 15	71.5	14.1	 16
421	 15	63.5	13.9	 16
422	 15	61.3	11.8	 16
423	 15	166.3	43.4	 16
424	 15	114.3	21.6	 16
425	 15	64.8	9.3	 16
426	 15	66.8	14.3	 16
427	 15	173.8	15.7	 16
428	 15	60.8	11.9	 16
429	 15	71.5	13.4	 16
430	 15	67.5	12.1	 16
431	 15	5741.5	534.3	 16
432	 15	90.8	15.4	 16
433	 15	93.8	19.2	 16
434	 15	287.0	47.0	 16
435	 15	181.0	26.0	 16
436	 15	113.3	13.4	 16
437	 15	227.5	23.5	 16
438	 15	181.0	27.2	 16
439	 15	104.8	18.9	 16
440	 15	4963.5	476.9	 16
441	 15	247.8	31.7	 16
442	 15	56.3	10.6	 16
443	 15	159.3	17.6	 16
444	 15	154.5	15.4	 16
445	 15	201.3	26.9	 16
446	 15	175.8	24.4	 16
447	 15	173.0	22.9	 16
448	 15	196.0	33.0	 16
449	 15	194.5	33.7	 16
450	 15	226.5	31.4	 16
451	 15	557.5	101.7	 16
452	 15	79.3	11.8	 16
453	 15	171.5	26.3	 16
454	 15	229.3	48.8	 16
455	 15	72.5	10.4	 16
456	 15	49.3	10.0	 16
457	 15	85.0	13.0	 16
458	 15	232.8	28.4	 16
459	 15	99.5	15.7	 16
460	 15	92.0	19.3	 16
461	 15	92.3	16.8	 16
462	 15	78.8	13.9	 16
463	 15	67.3	12.7	 16
464	 15	96.5	19.6	 16
465	 15	73.0	13.0	 16
466	 15	65.5	13.6	 16
467	 15	118.3	18.1	 16
468	 15	114.0	22.6	 16
469	 15	182.5	35.0	 16
470	 15	74.3	15.5	 16
471	 15	116.5	22.6	 16
472	 15	78.0	9.6	 16
473	 15	75.5	16.3	 16
474	 15	110.3	19.8	 16
475	 15	112.3	16.1	 16
476	 15	65.3	11.6	 16
477	 15	161.8	28.8	 16
478	 15	485.3	62.3	 16
479	 15	116.8	14.2	 16
480	 15	80.8	14.2	 16
481	 15	133.0	24.6	 16
482	 15	72.3	11.9	 16
483	 15	60.5	11.3	 16
484	 15	74.3	18.5	 16
485	 15	56.8	8.4	 16
486	 15	90.0	14.7	 16
487	 15	78.5	10.8	 16
488	 15	75.3	13.0	 16
489	 15	67.5	10.9	 16
490	 15	62.8	13.8	 16
491	 15	57.5	15.6	 16
492	 15	124.3	17.2	 16
493	 15	89.3	14.3	 16
494	 15	69.3	19.9	 16
495	 15	63.0	10.4	 16
496	 15	130.8	29.0	 16
497	 15	65.0	13.3	 16
498	 15	58.0	10.5	 16
499	 15	61.0	10.4	 16
500	 15	57.8	11.1	 16
501	 15	85.3	18.2	 16
502	 15	69.5	11.6	 16
503	 15	158.3	20.4	 16
504	 15	92.3	25.7	 16
505	 15	167.3	34.6	 16
506	 15	67.3	9.3	 16
507	 15	226.0	38.8	 16
508	 15	118.5	25.0	 16
509	 15	86.3	16.0	 16
510	 15	87.0	12.7	 16
511	 15	99.3	18.8	 16
512	 15	70.5	11.2	 16
513	 15	79.3	12.3	 16
514	 15	123.8	126.1	 16
515	 15	74.0	13.9	 16
516	 15	102.0	20.7	 20
517	 15	84.5	19.1	 16
518	 15	108.0	19.8	 16
519	 15	69.8	12.4	 16
520	 15	61.5	11.6	 16
521	 15	89.3	21.2	 16
522	 15	63.3	11.3	 16
523	 15	188.3	27.1	 16
524	 15	55.3	11.6	 16
525	 15	194.0	26.4	 16
526	 15	119.0	19.3	 16
527	 15	81.5	12.0	 16
528	 15	144.0	81.2	 16
529	 15	80.5	13.1	 16
530	 15	122.3	19.5	 16
531	 15	128.3	22.6	 16
532	 15	59.0	7.3	 16
533	 15	56.3	9.9	 16
534	 15	68.5	12.1	 16
535	 15	176.5	16.8	 16
536	 15	101.3	17.2	 16
537	 15	218.0	25.0	 16
538	 15	223.0	34.0	 16
539	 15	117.8	19.8	 16
540	 15	1022.8	130.6	 16
541	 15	76.3	13.2	 16
542	 15	88.5	21.5	 16
543	 15	82.5	15.5	 16
544	 15	331.0	31.5	 16
545	 15	127.5	19.8	 16
546	 15	69.8	14.3	 16
547	 15	235.3	36.1	 16
548	 15	116.5	18.1	 16
549	 15	62.5	13.4	 16
550	 15	58.0	8.9	 16
551	 15	62.0	9.5	 16
552	 15	104.0	17.1	 16
553	 15	236.5	44.1	 16
554	 15	110.0	19.1	 16
555	 15	73.3	15.6	 16
556	 15	560.5	93.6	 16
557	 15	257.0	33.8	 16
558	 15	67.3	10.3	 16
559	 15	115.3	22.0	 16
560	 15	63.3	13.9	 16
561	 15	156.3	23.3	 16
562	 15	95.5	19.0	 16
563	 15	110.3	19.5	 16
564	 15	88.0	13.3	 16
565	 15	92.3	14.9	 16
566	 15	215.8	101.8	 16
567	 15	163.3	25.5	 16
568	 15	161.0	21.6	 16
569	 15	160.0	28.5	 16
570	 15	274.5	44.5	 16
571	 15	108.8	36.2	 16
572	 15	101.8	22.8	 16
573	 15	433.8	97.1	 16
574	 15	54.5	11.7	 16
575	 15	63.3	10.7	 16
576	 15	153.8	53.7	 16
577	 15	257.0	46.5	 16
578	 15	73.3	11.1	 16
579	 15	109.3	18.5	 16
580	 15	250.5	41.1	 16
581	 15	100.5	14.5	 16
582	 15	90.3	16.3	 16
583	 15	96.0	17.5	 16
584	 15	106.8	17.1	 16
585	 15	108.0	20.4	 16
586	 15	592.8	104.8	 16
587	 15	111.0	23.6	 16
588	 15	88.0	11.6	 16
589	 15	57.3	10.1	 16
590	 15	59.8	12.1	 16
591	 15	81.8	14.8	 16
592	 15	207.3	32.0	 16
593	 15	157.0	23.9	 16
594	 15	77.8	17.4	 16
595	 15	132.5	21.2	 16
596	 15	101.5	22.2	 16
597	 15	119.5	11.3	 16
598	 15	98.8	12.8	 16
599	 15	135.0	22.0	 16
600	 15	309.3	57.3	 16
601	 15	234.3	38.1	 16
602	 15	162.8	30.4	 16
603	 15	51.5	9.8	 16
604	 15	104.0	21.6	 16
605	 15	204.0	25.9	 16
606	 15	89.5	17.7	 16
607	 15	370.5	37.9	 16
608	 15	335.3	60.9	 16
609	 15	70.3	21.7	 16
610	 15	59.0	13.2	 16
611	 15	57.3	8.1	 16
612	 15	75.0	16.5	 16
613	 15	193.0	27.4	 16
614	 15	168.3	24.1	 16
615	 15	89.8	16.0	 16
616	 15	120.8	35.3	 16
617	 15	355.3	44.6	 16
618	 15	93.0	16.2	 16
619	 15	216.8	27.4	 16
620	 15	242.8	31.8	 16
621	 15	125.3	24.3	 16
622	 15	1673.8	281.7	 16
623	 15	440.0	53.7	 16
624	 15	75.3	16.6	 16
625	 15	170.3	36.6	 16
626	 15	80.0	13.1	 16
627	 15	108.3	19.9	 16
628	 15	125.3	19.0	 16
629	 15	135.3	25.2	 16
630	 15	209.8	36.9	 16
631	 15	124.3	25.4	 16
632	 15	157.3	23.1	 16
633	 15	297.3	36.8	 16
634	 15	311.5	31.4	 16
635	 15	205.3	26.4	 16
636	 15	162.3	23.0	 16
637	 15	97.3	15.5	 16
638	 15	224.5	46.1	 16
639	 15	105.8	20.4	 16
640	 15	108.8	19.8	 16
641	 15	185.5	25.3	 16
642	 15	120.0	22.5	 16
643	 15	359.5	78.4	 16
644	 15	130.0	19.8	 16
645	 15	164.5	41.1	 16
646	 15	126.0	21.7	 16
647	 15	98.5	15.3	 16
648	 15	186.8	28.9	 16
649	 15	173.0	65.8	 16
650	 15	65.5	14.0	 16
651	 15	63.0	9.8	 16
652	 15	87.5	13.5	 16
653	 15	159.5	38.2	 16
654	 15	76.8	15.1	 16
655	 15	63.0	13.9	 16
656	 15	2046.5	532.3	 16
657	 15	73.0	15.0	 16
658	 15	91.5	12.1	 16
659	 15	90.3	17.3	 20
660	 15	401.8	54.6	 16
661	 15	104.0	16.3	 16
662	 15	2662.0	263.7	 16
663	 15	84.3	13.8	 16
664	 15	98.0	14.7	 16
665	 15	225.5	31.5	 16
666	 15	88.0	60.4	 16
667	 15	61.3	11.1	 16
668	 15	97.0	14.0	 16
669	 15	68.5	13.8	 16
670	 15	77.3	13.1	 16
671	 15	151.5	15.0	 16
672	 15	101.3	12.2	 16
673	 15	145.8	23.2	 16
674	 15	108.0	18.1	 16
675	 15	2986.0	268.2	 16
676	 15	127.3	14.7	 16
677	 15	90.0	12.8	 16
678	 15	167.3	26.5	 16
679	 15	85.3	15.5	 16
680	 15	77.0	9.1	 16
681	 15	64.3	10.9	 16
682	 15	66.3	11.1	 16
683	 15	193.5	22.0	 16
684	 15	130.8	26.2	 16
685	 15	159.0	19.1	 16
686	 15	658.5	82.1	 16
687	 15	88.5	12.2	 16
688	 15	149.0	18.0	 16
689	 15	59.3	7.6	 16
690	 15	289.0	61.1	 16
691	 15	102.0	10.0	 16
692	 15	4460.0	506.5	 16
693	 15	78.0	13.3	 16
694	 15	187.8	31.4	 16
695	 15	67.8	8.7	 16
696	 15	79.0	9.8	 16
697	 15	131.8	23.8	 16
698	 15	108.3	14.3	 16
699	 15	87.0	15.3	 16
700	 15	79.3	14.9	 16
701	 15	127.8	20.6	 16
702	 15	253.3	28.1	 16
703	 15	69.5	13.3	 16
704	 15	262.0	37.8	 16
705	 15	289.0	39.6	 16
706	 15	142.3	29.0	 16
707	 15	121.8	23.8	 16
708	 15	257.3	33.9	 16
709	 15	65.5	9.4	 16
710	 15	1619.8	183.5	 16
711	 15	119.8	17.8	 16
  0	 16	8187.0	955.8	 16
  1	 16	92.5	15.4	 16
  2	 16	70.5	13.5	 16
  3	 16	65.5	8.3	 16
  4	 16	84.8	12.9	 16
  5	 16	85.0	17.3	 16
  6	 16	94.5	14.9	 16
  7	 16	77.0	12.0	 16
  8	 16	84.5	25.6	 16
  9	 16	88.5	18.4	 16
 10	 16	64.3	13.3	 16
 11	 16	79.0	33.3	 16
 12	 16	116.5	21.2	 16
 13	 16	67.3	12.4	 16
 14	 16	71.3	10.9	 16
 15	 16	69.3	14.2	 16
 16	 16	222.3	28.4	 16
 17	 16	131.3	17.8	 16
 18	 16	77.0	14.3	 16
 19	 16	153.0	14.8	 16
 20	 16	94.8	18.8	 16
 21	 16	66.5	12.8	 16
 22	 16	72.0	11.4	 16
 23	 16	70.3	11.0	 16
 24	 16	132.0	20.4	 16
 25	 16	97.0	19.1	 16
 26	 16	71.5	10.2	 16
 27	 16	77.3	84.4	 16
 28	 16	121.5	17.2	 16
 29	 16	121.0	18.6	 16
 30	 16	84.3	15.5	 16
 31	 16	143.5	20.3	 16
 32	 16	71.3	12.0	 16
 33	 16	78.3	18.0	 16
 34	 16	87.8	34.7	 16
 35	 16	125.5	19.1	 16
 36	 16	77.3	13.2	 16
 37	 16	61.0	14.1	 16
 38	 16	60.5	14.7	 16
 39	 16	85.5	70.6	 16
 40	 16	66.3	10.4	 16
 41	 16	85.0	16.2	 16
 42	 16	81.0	13.9	 16
 43	 16	104.3	13.5	 16
 44	 16	164.5	19.4	 16
 45	 16	145.5	35.4	 16
 46	 16	84.0	13.1	 16
 47	 16	93.8	19.7	 16
 48	 16	589.8	41.8	 16
 49	 16	120.3	20.5	 16
 50	 16	100.3	20.0	 16
 51	 16	210.3	20.6	 16
 52	 16	157.5	20.2	 16
 53	 16	93.0	15.2	 16
 54	 16	70.8	13.7	 16
 55	 16	72.0	13.3	 16
 56	 16	178.3	115.6	 16
 57	 16	99.5	18.0	 16
 58	 16	338.3	42.7	 16
 59	 16	95.3	23.5	 16
 60	 16	72.0	14.4	 16
 61	 16	77.8	16.2	 16
 62	 16	101.0	15.5	 16
 63	 16	61.3	10.4	 16
 64	 16	214.0	41.9	 16
 65	 16	87.0	15.2	 16
 66	 16	79.8	38.3	 16
 67	 16	109.3	18.9	 16
 68	 16	150.5	28.2	 16
 69	 16	231.0	34.8	 16
 70	 16	130.5	24.6	 16
 71	 16	86.3	14.7	 16
 72	 16	237.8	22.9	 16
 73	 16	226.0	28.2	 16
 74	 16	1366.3	189.0	 16
 75	 16	79.0	18.7	 16
 76	 16	231.8	45.5	 16
 77	 16	96.5	16.2	 16
 78	 16	61.3	11.1	 16
 79	 16	70.3	10.5	 16
 80	 16	63.5	14.6	 16
 81	 16	104.0	17.9	 16
 82	 16	65.8	11.9	 16
 83	 16	92.3	18.0	 16
 84	 16	58.0	8.2	 16
 85	 16	76.0	12.0	 16
 86	 16	72.8	29.7	 16
 87	 16	64.5	11.1	 16
 88	 16	95.8	17.0	 16
 89	 16	92.0	16.0	 16
 90	 16	107.5	23.5	 16
 91	 16	139.0	23.7	 20
 92	 16	84.3	12.2	 16
 93	 16	73.5	11.4	 16
 94	 16	94.3	13.8	 16
 95	 16	125.0	19.8	 16
 96	 16	119.3	22.0	 16
 97	 16	62.3	14.4	 16
 98	 16	81.5	21.2	 16
 99	 16	54.3	8.5	 16
100	 16	67.5	12.9	 16
101	 16	410.3	83.2	 16
102	 16	67.0	12.9	 16
103	 16	72.0	14.5	 16
104	 16	178.3	26.0	 16
105	 16	187.8	24.2	 16
106	 16	86.5	19.0	 16
107	 16	54.3	6.0	 16
108	 16	146.0	23.5	 16
109	 16	66.0	11.5	 16
110	 16	71.3	14.9	 16
111	 16	126.3	19.7	 16
112	 16	126.3	18.3	 16
113	 16	113.3	10.2	 16
114	 16	146.5	17.1	 16
115	 16	205.0	27.3	 16
116	 16	100.0	23.9	 16
117	 16	169.0	24.6	 16
118	 16	211.5	25.2	 16
119	 16	72.8	8.6	 16
120	 16	68.0	13.3	 16
121	 16	109.5	12.8	 16
122	 16	64.3	9.4	 16
123	 16	71.3	12.2	 16
124	 16	91.5	15.3	 16
125	 16	70.3	9.8	 16
126	 16	81.0	15.4	 16
127	 16	50.0	5.3	 16
128	 16	69.5	15.1	 16
129	 16	54.3	7.8	 16
130	 16	73.0	15.5	 16
131	 16	101.8	14.2	 16
132	 16	69.5	9.8	 16
133	 16	79.3	12.1	 16
134	 16	66.3	14.1	 16
135	 16	81.8	69.6	 16
136	 16	67.5	16.6	 16
137	 16	295.5	40.3	 16
138	 16	150.3	28.5	 16
139	 16	90.5	15.0	 16
140	 16	64.5	11.3	 16
141	 16	66.5	10.9	 16
142	 16	54.5	10.3	 16
143	 16	144.5	18.2	 16
144	 16	373.0	35.6	 16
145	 16	159.3	18.1	 16
146	 16	72.3	13.7	 16
147	 16	66.0	10.7	 16
148	 16	534.8	40.3	 16
149	 16	132.5	24.7	 16
150	 16	133.3	22.6	 16
151	 16	150.5	17.7	 16
152	 16	64.3	12.2	 16
153	 16	74.3	9.9	 16
154	 16	98.0	16.0	 16
155	 16	62.5	11.4	 16
156	 16	70.3	18.3	 16
157	 16	116.3	20.4	 16
158	 16	146.5	23.1	 16
159	 16	186.3	21.8	 16
160	 16	405.0	116.0	 16
161	 16	234.8	47.4	 16
162	 16	67.5	10.3	 16
163	 16	98.5	18.0	 16
164	 16	62.0	11.5	 16
165	 16	61.8	13.2	 16
166	 16	93.3	47.1	 16
167	 16	69.5	14.8	 16
168	 16	75.8	14.0	 16
169	 16	72.3	16.1	 16
170	 16	63.8	11.6	 16
171	 16	70.3	15.0	 16
172	 16	88.8	12.7	 16
173	 16	76.3	12.6	 16
174	 16	60.0	14.9	 16
175	 16	69.3	10.9	 16
176	 16	78.3	42.7	 16
177	 16	209.0	39.0	 16
178	 16	918.5	296.5	 16
179	 16	104.3	17.9	 16
180	 16	74.5	13.0	 16
181	 16	157.8	22.7	 16
182	 16	229.5	30.8	 16
183	 16	148.3	19.7	 16
184	 16	126.5	16.5	 16
185	 16	69.0	16.2	 16
186	 16	69.0	11.3	 16
187	 16	64.3	10.1	 16
188	 16	118.8	20.8	 16
189	 16	167.5	65.7	 16
190	 16	165.0	16.3	 16
191	 16	78.3	13.6	 16
192	 16	91.5	19.1	 16
193	 16	86.5	14.4	 16
194	 16	151.0	13.6	 16
195	 16	93.5	10.4	 16
196	 16	62.5	15.6	 16
197	 16	75.0	26.1	 16
198	 16	52.3	8.5	 16
199	 16	64.3	9.9	 16
200	 16	59.8	9.5	 16
201	 16	80.0	14.3	 16
202	 16	169.0	23.1	 16
203	 16	90.5	21.4	 16
204	 16	77.5	21.2	 16
205	 16	121.0	18.2	 16
206	 16	90.0	11.0	 16
207	 16	62.5	11.1	 16
208	 16	84.8	11.8	 16
209	 16	99.3	19.5	 16
210	 16	56.3	9.5	 16
211	 16	57.0	9.3	 16
212	 16	59.3	7.5	 16
213	 16	54.5	8.1	 16
214	 16	56.5	10.9	 16
215	 16	67.0	10.4	 16
216	 16	169.5	30.2	 16
217	 16	89.0	11.1	 16
218	 16	122.3	19.7	 16
219	 16	96.5	22.2	 16
220	 16	63.5	7.1	 16
221	 16	82.5	15.9	 16
222	 16	129.3	34.0	 16
223	 16	77.8	16.6	 16
224	 16	76.3	11.6	 16
225	 16	65.8	11.1	 16
226	 16	59.0	10.7	 16
227	 16	67.3	12.0	 16
228	 16	60.5	12.3	 16
229	 16	361.5	41.7	 16
230	 16	69.0	17.2	 16
231	 16	79.0	15.0	 16
232	 16	53.5	10.7	 16
233	 16	65.5	11.7	 20
234	 16	178.3	41.0	 16
235	 16	341.3	38.8	 16
236	 16	406.0	44.5	 16
237	 16	160.5	18.4	 16
238	 16	78.3	12.0	 16
239	 16	102.3	14.1	 16
240	 16	107.5	21.3	 16
241	 16	68.3	13.8	 16
242	 16	110.0	18.6	 16
243	 16	74.0	12.5	 16
244	 16	72.8	20.3	 16
245	 16	108.5	26.1	 16
246	 16	71.3	41.2	 16
247	 16	86.5	10.7	 16
248	 16	66.3	7.3	 16
249	 16	114.5	27.2	 16
250	 16	61.5	10.6	 16
251	 16	69.8	13.2	 16
252	 16	65.3	11.5	 16
253	 16	119.0	32.1	 16
254	 16	558.8	68.0	 16
255	 16	149.0	23.0	 16
256	 16	105.8	82.9	 16
257	 16	143.0	33.0	 16
258	 16	79.3	34.1	 16
259	 16	63.3	10.7	 16
260	 16	67.0	14.1	 16
261	 16	78.8	10.1	 16
262	 16	93.5	14.2	 16
263	 16	76.3	14.5	 16
264	 16	113.3	18.7	 16
265	 16	88.0	16.3	 16
266	 16	79.5	19.9	 16
267	 16	102.8	19.0	 16
268	 16	150.3	25.8	 16
269	 16	82.5	22.1	 16
270	 16	64.8	10.6	 16
271	 16	76.0	17.1	 16
272	 16	89.0	41.7	 16
273	 16	72.0	10.9	 16
274	 16	160.0	17.8	 16
275	 16	182.0	26.0	 16
276	 16	101.3	18.3	 16
277	 16	72.3	11.8	 16
278	 16	53.8	7.4	 16
279	 16	76.8	14.5	 16
280	 16	145.0	23.5	 16
281	 16	87.5	17.3	 16
282	 16	88.3	19.4	 16
283	 16	60.5	14.0	 16
284	 16	67.5	11.7	 16
285	 16	96.0	13.8	 16
286	 16	98.8	10.9	 16
287	 16	144.8	18.7	 16
288	 16	346.5	26.1	 16
289	 16	87.0	9.8	 16
290	 16	86.0	15.5	 16
291	 16	86.3	16.2	 16
292	 16	271.5	63.6	 16
293	 16	112.8	18.9	 16
294	 16	85.3	13.7	 16
295	 16	71.3	13.1	 16
296	 16	78.5	16.6	 16
297	 16	224.8	29.3	 16
298	 16	95.3	15.9	 16
299	 16	96.5	14.6	 16
300	 16	66.3	11.0	 16
301	 16	78.5	19.8	 16
302	 16	66.8	9.2	 16
303	 16	60.5	10.1	 16
304	 16	77.3	14.6	 16
305	 16	65.3	15.3	 16
306	 16	72.3	12.3	 16
307	 16	77.5	12.5	 16
308	 16	97.3	18.9	 16
309	 16	94.0	18.2	 16
310	 16	619.8	107.0	 16
311	 16	161.8	20.4	 16
312	 16	107.8	25.1	 16
313	 16	58.0	12.5	 16
314	 16	70.8	10.8	 16
315	 16	75.5	20.2	 16
316	 16	423.0	47.1	 16
317	 16	192.0	24.9	 16
318	 16	97.5	17.6	 16
319	 16	161.8	18.1	 16
320	 16	123.8	19.7	 16
321	 16	163.0	21.0	 16
322	 16	182.3	31.3	 16
323	 16	56.5	13.8	 16
324	 16	96.8	23.4	 16
325	 16	163.3	34.4	 16
326	 16	86.8	13.8	 16
327	 16	94.3	18.5	 16
328	 16	65.8	14.9	 16
329	 16	62.3	23.9	 16
330	 16	139.3	19.1	 16
331	 16	59.3	12.0	 16
332	 16	118.5	23.4	 16
333	 16	181.3	25.5	 16
334	 16	63.3	12.3	 16
335	 16	53.0	8.7	 16
336	 16	61.3	11.4	 16
337	 16	176.0	28.6	 16
338	 16	76.0	9.8	 16
339	 16	78.0	12.3	 16
340	 16	68.3	10.8	 16
341	 16	55.0	8.0	 16
342	 16	70.3	12.1	 16
343	 16	74.3	14.3	 16
344	 16	56.0	6.8	 16
345	 16	71.5	15.6	 16
346	 16	90.3	17.7	 16
347	 16	54.0	7.1	 16
348	 16	69.3	13.2	 16
349	 16	75.5	15.1	 16
350	 16	82.0	15.0	 16
351	 16	104.0	15.3	 16
352	 16	62.3	13.1	 16
353	 16	71.3	15.5	 16
354	 16	95.3	73.0	 16
355	 16	71.3	11.4	 16
356	 16	231.8	25.6	 16
357	 16	114.8	15.0	 16
358	 16	119.3	18.5	 16
359	 16	103.0	8.6	 16
360	 16	58.3	13.7	 16
361	 16	83.5	64.1	 16
362	 16	82.8	17.7	 16
363	 16	57.3	9.9	 16
364	 16	70.3	12.0	 16
365	 16	55.3	10.2	 16
366	 16	89.3	17.1	 16
367	 16	114.0	19.4	 16
368	 16	68.0	22.4	 16
369	 16	72.0	16.5	 16
370	 16	50.3	5.9	 16
371	 16	59.5	8.9	 16
372	 16	105.5	43.1	 16
373	 16	125.5	19.9	 16
374	 16	58.5	13.3	 16
375	 16	252.8	22.3	 20
376	 16	112.3	18.3	 16
377	 16	101.3	16.0	 16
378	 16	86.0	16.0	 16
379	 16	153.3	35.6	 16
380	 16	64.5	8.5	 16
381	 16	63.5	10.0	 16
382	 16	55.3	10.4	 16
383	 16	68.3	14.8	 16
384	 16	75.8	11.0	 16
385	 16	88.0	46.4	 16
386	 16	110.3	12.8	 16
387	 16	187.3	20.5	 16
388	 16	204.0	34.4	 16
389	 16	103.3	16.5	 16
390	 16	65.3	8.2	 16
391	 16	65.5	12.4	 16
392	 16	73.8	19.7	 16
393	 16	119.5	21.2	 16
394	 16	126.3	15.2	 16
395	 16	88.5	17.4	 16
396	 16	66.8	13.4	 16
397	 16	62.3	12.2	 16
398	 16	68.3	13.1	 16
399	 16	66.0	13.0	 16
400	 16	107.8	17.9	 16
401	 16	63.0	12.4	 16
402	 16	109.3	18.6	 16
403	 16	101.5	19.7	 16
404	 16	192.5	20.1	 16
405	 16	284.8	26.1	 16
406	 16	90.0	12.9	 16
407	 16	87.0	12.6	 16
408	 16	86.3	13.1	 16
409	 16	63.5	11.6	 16
410	 16	91.0	9.8	 16
411	 16	58.3	9.8	 16
412	 16	61.8	10.2	 16
413	 16	64.8	8.5	 16
414	 16	62.0	10.5	 16
415	 16	77.3	13.2	 16
416	 16	138.3	25.4	 16
417	 16	116.8	14.9	 16
418	 16	89.3	10.4	 16
419	 16	77.5	8.3	 16
420	 16	77.5	17.6	 16
421	 16	58.5	8.8	 16
422	 16	57.0	9.2	 16
423	 16	151.3	103.4	 16
424	 16	67.5	18.7	 16
425	 16	67.8	15.3	 16
426	 16	72.5	13.6	 16
427	 16	141.3	24.1	 16
428	 16	69.0	10.7	 16
429	 16	57.0	11.0	 16
430	 16	64.8	10.8	 16
431	 16	1501.0	275.1	 16
432	 16	69.8	11.7	 16
433	 16	67.0	15.0	 16
434	 16	204.8	93.7	 16
435	 16	123.0	23.4	 16
436	 16	80.0	14.4	 16
437	 16	186.0	28.2	 16
438	 16	246.8	34.6	 16
439	 16	125.0	20.1	 16
440	 16	992.8	183.9	 16
441	 16	297.0	32.4	 16
442	 16	66.0	10.0	 16
443	 16	72.0	11.3	 16
444	 16	88.5	11.3	 16
445	 16	240.0	36.0	 16
446	 16	165.3	33.9	 16
447	 16	140.8	18.5	 16
448	 16	160.3	20.5	 16
449	 16	101.8	26.0	 16
450	 16	103.3	14.6	 16
451	 16	214.3	32.8	 16
452	 16	112.0	18.5	 16
453	 16	151.8	30.1	 16
454	 16	156.5	130.3	 16
455	 16	60.5	11.1	 16
456	 16	52.3	11.0	 16
457	 16	66.5	13.7	 16
458	 16	140.0	26.1	 16
459	 16	94.5	64.5	 16
460	 16	171.5	67.9	 16
461	 16	98.3	12.5	 16
462	 16	83.5	10.3	 16
463	 16	69.3	16.3	 16
464	 16	74.3	10.6	 16
465	 16	84.5	14.5	 16
466	 16	79.5	35.8	 16
467	 16	77.0	15.0	 16
468	 16	82.0	12.0	 16
469	 16	129.0	22.4	 16
470	 16	125.3	46.6	 16
471	 16	73.3	12.7	 16
472	 16	90.3	13.2	 16
473	 16	61.3	7.3	 16
474	 16	83.3	11.9	 16
475	 16	126.8	17.0	 16
476	 16	49.3	8.5	 16
477	 16	89.3	16.9	 16
478	 16	145.5	21.6	 16
479	 16	107.5	25.2	 16
480	 16	65.5	20.0	 16
481	 16	83.8	14.0	 16
482	 16	69.3	9.5	 16
483	 16	65.0	11.8	 16
484	 16	65.3	8.9	 16
485	 16	57.8	13.7	 16
486	 16	83.5	12.2	 16
487	 16	75.5	18.5	 16
488	 16	79.5	13.1	 16
489	 16	70.8	13.5	 16
490	 16	83.0	16.6	 16
491	 16	57.5	13.9	 16
492	 16	105.3	20.4	 16
493	 16	117.5	20.5	 16
494	 16	57.0	11.0	 16
495	 16	54.8	8.7	 16
496	 16	59.0	11.2	 16
497	 16	57.8	12.5	 16
498	 16	54.0	8.7	 16
499	 16	61.3	12.6	 16
500	 16	60.3	11.1	 16
501	 16	143.8	26.4	 16
502	 16	70.3	11.0	 16
503	 16	71.3	12.9	 16
504	 16	56.3	7.6	 16
505	 16	83.3	14.2	 16
506	 16	72.3	15.4	 16
507	 16	79.0	13.3	 16
508	 16	103.3	16.2	 16
509	 16	110.3	15.3	 16
510	 16	95.0	16.3	 16
511	 16	72.0	16.8	 16
512	 16	77.8	11.0	 12
513	 16	70.3	10.1	 16
514	 16	100.0	18.7	 16
515	 16	67.3	13.3	 16
516	 16	67.8	6.4	 16
517	 16	53.3	9.0	 16
518	 16	66.3	7.0	 20
519	 16	52.3	12.9	 16
520	 16	76.5	35.7	 16
521	 16	67.3	13.4	 16
522	 16	66.0	11.9	 16
523	 16	71.8	13.3	 16
524	 16	57.8	17.0	 16
525	 16	84.3	14.6	 16
526	 16	83.3	15.9	 16
527	 16	126.3	21.2	 16
528	 16	69.5	11.1	 16
529	 16	50.3	9.5	 16
530	 16	147.0	20.4	 16
531	 16	215.3	25.9	 16
532	 16	63.0	23.5	 16
533	 16	58.8	11.3	 16
534	 16	79.3	22.2	 16
535	 16	128.3	29.8	 16
536	 16	56.0	11.6	 16
537	 16	143.5	18.2	 16
538	 16	247.0	30.5	 16
539	 16	119.0	18.4	 16
540	 16	247.8	30.8	 16
541	 16	67.0	11.8	 16
542	 16	75.5	12.4	 16
543	 16	69.5	16.3	 16
544	 16	136.3	22.0	 16
545	 16	105.5	19.7	 16
546	 16	64.0	9.0	 16
547	 16	111.5	18.0	 16
548	 16	84.0	13.8	 16
549	 16	50.5	8.6	 16
550	 16	55.3	8.0	 16
551	 16	64.0	10.2	 16
552	 16	67.3	13.8	 16
553	 16	72.3	12.8	 16
554	 16	282.0	36.8	 16
555	 16	95.0	10.2	 16
556	 16	363.5	40.6	 16
557	 16	141.3	23.6	 16
558	 16	78.0	16.8	 16
559	 16	86.0	18.3	 16
560	 16	61.5	14.1	 16
561	 16	69.8	53.1	 16
562	 16	90.8	14.1	 16
563	 16	91.3	18.1	 16
564	 16	87.5	19.4	 16
565	 16	87.3	14.7	 16
566	 16	62.0	11.3	 16
567	 16	178.8	21.7	 16
568	 16	169.0	27.4	 16
569	 16	177.8	27.3	 16
570	 16	171.8	28.6	 16
571	 16	70.8	12.8	 16
572	 16	75.5	13.2	 16
573	 16	77.0	13.6	 16
574	 16	56.3	10.3	 16
575	 16	59.3	12.6	 16
576	 16	80.8	12.4	 16
577	 16	206.3	32.3	 16
578	 16	74.0	15.0	 16
579	 16	86.3	25.5	 16
580	 16	164.3	22.2	 16
581	 16	102.3	17.6	 16
582	 16	78.3	12.5	 16
583	 16	93.8	27.4	 16
584	 16	88.5	15.5	 16
585	 16	110.8	21.3	 16
586	 16	128.5	17.8	 16
587	 16	85.5	20.6	 16
588	 16	76.3	13.8	 16
589	 16	60.3	9.3	 16
590	 16	57.8	9.6	 16
591	 16	72.5	12.1	 16
592	 16	71.3	5.0	 16
593	 16	158.0	35.3	 16
594	 16	92.3	16.8	 16
595	 16	188.8	24.5	 16
596	 16	91.5	10.6	 16
597	 16	78.3	8.8	 16
598	 16	54.3	11.2	 16
599	 16	83.3	17.2	 16
600	 16	131.5	14.4	 16
601	 16	158.5	23.5	 16
602	 16	137.3	26.8	 16
603	 16	62.3	11.9	 16
604	 16	80.3	20.4	 16
605	 16	128.3	15.0	 16
606	 16	71.0	16.1	 16
607	 16	87.0	16.2	 16
608	 16	95.8	19.9	 16
609	 16	103.0	18.4	 16
610	 16	61.3	11.1	 16
611	 16	77.5	14.8	 16
612	 16	76.0	18.2	 16
613	 16	103.3	17.4	 16
614	 16	81.8	14.0	 16
615	 16	62.3	9.8	 16
616	 16	88.3	19.7	 16
617	 16	214.3	26.6	 16
618	 16	94.5	15.7	 16
619	 16	163.3	17.0	 16
620	 16	116.0	12.9	 16
621	 16	71.5	13.1	 16
622	 16	401.5	69.5	 16
623	 16	460.5	39.3	 16
624	 16	76.0	16.8	 16
625	 16	209.5	25.1	 16
626	 16	94.8	13.8	 16
627	 16	97.8	16.5	 16
628	 16	163.0	25.8	 16
629	 16	138.0	30.6	 16
630	 16	225.8	31.5	 16
631	 16	162.8	29.8	 16
632	 16	97.0	17.4	 16
633	 16	191.3	23.5	 16
634	 16	197.0	30.5	 16
635	 16	179.5	27.7	 16
636	 16	119.8	21.9	 16
637	 16	87.3	14.9	 16
638	 16	178.3	22.0	 16
639	 16	86.3	12.7	 16
640	 16	93.8	16.8	 16
641	 16	257.8	38.2	 16
642	 16	171.5	30.0	 16
643	 16	88.3	13.1	 16
644	 16	157.8	84.0	 16
645	 16	84.0	13.7	 16
646	 16	85.3	23.4	 16
647	 16	117.0	25.4	 16
648	 16	97.5	18.6	 16
649	 16	79.5	12.6	 16
650	 16	66.5	12.1	 16
651	 16	54.8	10.1	 16
652	 16	79.0	14.2	 16
653	 16	133.3	21.3	 16
654	 16	97.3	18.4	 16
655	 16	60.3	11.9	 16
656	 16	373.0	101.2	 16
657	 16	102.0	13.7	 16
658	 16	90.8	16.5	 16
659	 16	70.0	9.0	 16
660	 16	192.8	40.7	 20
661	 16	101.3	19.4	 16
662	 16	589.8	80.9	 16
663	 16	100.5	10.9	 16
664	 16	105.3	14.2	 16
665	 16	222.8	38.3	 16
666	 16	65.0	13.6	 16
667	 16	52.0	6.3	 16
668	 16	70.3	14.7	 16
669	 16	64.3	11.0	 16
670	 16	61.8	9.6	 16
671	 16	110.5	14.4	 16
672	 16	104.8	18.0	 16
673	 16	77.3	13.3	 16
674	 16	150.0	21.4	 16
675	 16	690.3	82.0	 16
676	 16	100.5	19.3	 16
677	 16	76.5	14.1	 16
678	 16	89.0	14.6	 16
679	 16	98.8	15.8	 16
680	 16	69.3	10.2	 16
681	 16	70.8	13.0	 16
682	 16	55.8	11.6	 16
683	 16	119.5	16.9	 16
684	 16	98.0	19.8	 16
685	 16	95.8	14.5	 16
686	 16	126.0	12.7	 16
687	 16	155.0	24.0	 16
688	 16	66.5	16.2	 16
689	 16	57.3	11.9	 16
690	 16	91.0	15.4	 16
691	 16	89.8	19.1	 16
692	 16	731.0	144.3	 16
693	 16	74.5	10.2	 16
694	 16	130.5	13.3	 16
695	 16	72.5	17.3	 16
696	 16	86.8	11.1	 16
697	 16	90.3	21.1	 16
698	 16	83.3	13.4	 16
699	 16	55.3	10.1	 16
700	 16	89.3	13.1	 16
701	 16	141.0	21.3	 16
702	 16	523.5	67.1	 16
703	 16	125.8	34.7	 16
704	 16	467.8	45.7	 16
705	 16	343.3	28.6	 16
706	 16	177.0	26.7	 16
707	 16	110.5	17.0	 16
708	 16	140.3	16.9	 16
709	 16	63.8	9.8	 16
710	 16	243.8	33.7	 16
711	 16	8051.3	894.4	 16
  0	 17	104.3	17.9	 16
  1	 17	100.8	14.1	 16
  2	 17	76.3	24.8	 16
  3	 17	626.0	69.0	 16
  4	 17	136.3	17.4	 16
  5	 17	165.5	21.4	 16
  6	 17	240.0	48.8	 16
  7	 17	80.8	11.8	 16
  8	 17	220.0	37.8	 16
  9	 17	146.0	28.0	 16
 10	 17	70.3	17.5	 16
 11	 17	78.0	13.8	 16
 12	 17	100.3	19.4	 16
 13	 17	74.5	12.0	 16
 14	 17	89.5	16.9	 16
 15	 17	79.3	13.3	 16
 16	 17	185.5	19.7	 16
 17	 17	97.5	18.1	 16
 18	 17	1045.0	157.9	 16
 19	 17	92.0	17.6	 16
 20	 17	126.3	14.8	 16
 21	 17	97.3	20.1	 16
 22	 17	82.8	14.8	 16
 23	 17	61.3	12.0	 16
 24	 17	156.5	23.9	 16
 25	 17	95.5	39.5	 16
 26	 17	98.3	30.0	 16
 27	 17	57.8	7.7	 16
 28	 17	286.8	30.9	 16
 29	 17	53.0	10.3	 16
 30	 17	57.8	10.8	 16
 31	 17	62.3	11.0	 16
 32	 17	61.5	8.3	 16
 33	 17	56.8	13.5	 16
 34	 17	161.3	19.5	 16
 35	 17	173.8	31.7	 16
 36	 17	79.3	12.6	 16
 37	 17	109.0	16.9	 16
 38	 17	66.0	12.1	 16
 39	 17	231.3	38.5	 16
 40	 17	65.8	10.7	 16
 41	 17	76.3	19.0	 16
 42	 17	62.5	11.4	 16
 43	 17	67.5	11.7	 16
 44	 17	362.3	42.2	 16
 45	 17	369.3	37.8	 16
 46	 17	177.3	18.2	 16
 47	 17	151.3	27.1	 16
 48	 17	111.0	22.9	 16
 49	 17	97.8	15.7	 16
 50	 17	127.3	22.0	 16
 51	 17	94.3	19.0	 16
 52	 17	124.8	17.7	 16
 53	 17	66.5	16.0	 16
 54	 17	68.5	12.3	 16
 55	 17	73.0	13.6	 16
 56	 17	1122.0	185.4	 16
 57	 17	111.5	18.2	 16
 58	 17	52.5	7.4	 16
 59	 17	85.0	19.3	 16
 60	 17	110.8	18.8	 16
 61	 17	204.3	27.4	 16
 62	 17	92.8	17.0	 16
 63	 17	999.8	164.5	 16
 64	 17	153.3	14.2	 16
 65	 17	138.3	22.9	 16
 66	 17	78.3	17.6	 16
 67	 17	199.0	29.7	 16
 68	 17	241.5	33.2	 16
 69	 17	494.0	42.0	 16
 70	 17	515.3	31.6	 16
 71	 17	289.0	38.1	 16
 72	 17	214.5	43.7	 16
 73	 17	67.3	10.3	 16
 74	 17	194.5	31.3	 16
 75	 17	130.3	26.8	 16
 76	 17	1062.3	106.4	 16
 77	 17	766.8	133.1	 16
 78	 17	382.8	65.3	 16
 79	 17	102.3	17.8	 16
 80	 17	114.0	16.8	 16
 81	 17	72.5	11.5	 16
 82	 17	81.0	35.5	 16
 83	 17	241.0	36.6	 16
 84	 17	64.3	10.5	 16
 85	 17	65.5	13.8	 16
 86	 17	58.0	13.3	 16
 87	 17	114.3	90.2	 16
 88	 17	368.5	58.0	 16
 89	 17	609.3	101.6	 16
 90	 17	118.0	17.1	 16
 91	 17	295.0	30.4	 16
 92	 17	167.3	25.0	 20
 93	 17	159.0	30.0	 16
 94	 17	61.3	11.3	 16
 95	 17	132.5	15.1	 16
 96	 17	326.5	38.7	 16
 97	 17	1544.8	165.2	 16
 98	 17	128.3	19.9	 16
 99	 17	413.0	65.5	 16
100	 17	1135.0	87.1	 16
101	 17	184.0	30.6	 16
102	 17	127.3	20.8	 16
103	 17	75.3	14.4	 16
104	 17	68.3	11.8	 16
105	 17	327.5	158.6	 16
106	 17	63.3	11.0	 16
107	 17	59.0	9.5	 16
108	 17	86.8	11.1	 16
109	 17	116.3	15.6	 16
110	 17	283.3	52.8	 16
111	 17	164.0	22.6	 16
112	 17	128.0	21.4	 16
113	 17	204.5	23.7	 16
114	 17	95.3	16.7	 16
115	 17	332.0	35.3	 16
116	 17	161.5	26.9	 16
117	 17	145.3	15.2	 16
118	 17	199.3	35.6	 16
119	 17	166.0	23.0	 16
120	 17	76.0	13.5	 16
121	 17	61.8	10.3	 16
122	 17	97.3	16.3	 16
123	 17	84.3	15.8	 16
124	 17	150.5	22.8	 16
125	 17	121.3	21.4	 16
126	 17	137.5	10.9	 16
127	 17	108.8	17.8	 16
128	 17	66.3	9.1	 16
129	 17	129.5	27.6	 16
130	 17	74.8	13.6	 16
131	 17	153.8	16.4	 16
132	 17	78.0	14.7	 16
133	 17	93.5	18.7	 16
134	 17	85.5	12.0	 16
135	 17	114.5	34.6	 16
136	 17	102.3	16.4	 16
137	 17	129.3	21.6	 16
138	 17	62.0	9.9	 16
139	 17	69.3	12.4	 16
140	 17	80.3	19.1	 16
141	 17	65.8	9.2	 16
142	 17	345.5	71.4	 16
143	 17	103.3	23.3	 16
144	 17	80.0	19.1	 16
145	 17	69.8	12.8	 16
146	 17	106.8	17.9	 16
147	 17	65.0	11.9	 16
148	 17	131.0	14.6	 16
149	 17	71.0	9.2	 16
150	 17	62.5	9.7	 16
151	 17	76.3	14.5	 16
152	 17	90.8	10.6	 16
153	 17	89.5	15.7	 16
154	 17	129.8	17.8	 16
155	 17	77.3	13.0	 16
156	 17	82.0	16.8	 16
157	 17	728.8	105.3	 16
158	 17	112.3	17.6	 16
159	 17	170.0	24.7	 16
160	 17	125.5	20.5	 16
161	 17	141.5	14.1	 16
162	 17	143.3	26.6	 16
163	 17	100.5	23.1	 16
164	 17	101.5	15.0	 16
165	 17	66.3	12.4	 16
166	 17	88.3	14.7	 16
167	 17	80.3	13.4	 16
168	 17	198.8	27.0	 16
169	 17	175.5	28.1	 16
170	 17	439.5	52.6	 16
171	 17	97.5	16.8	 16
172	 17	282.5	31.9	 16
173	 17	149.0	14.9	 16
174	 17	131.8	19.6	 16
175	 17	163.3	23.4	 16
176	 17	359.5	45.9	 16
177	 17	280.0	31.3	 16
178	 17	625.0	52.5	 16
179	 17	274.0	29.2	 16
180	 17	180.3	27.1	 16
181	 17	112.0	18.4	 16
182	 17	119.5	20.0	 16
183	 17	101.0	16.6	 16
184	 17	74.8	12.4	 16
185	 17	71.5	11.8	 16
186	 17	104.3	19.9	 16
187	 17	886.8	126.5	 16
188	 17	64.8	37.7	 16
189	 17	95.8	48.6	 16
190	 17	58.5	12.0	 16
191	 17	116.8	27.2	 16
192	 17	95.8	29.7	 16
193	 17	167.5	27.6	 16
194	 17	1747.8	170.6	 16
195	 17	145.5	32.8	 16
196	 17	82.0	13.6	 16
197	 17	60.0	10.6	 16
198	 17	187.3	28.6	 16
199	 17	173.0	18.4	 16
200	 17	202.3	26.4	 16
201	 17	70.3	9.5	 16
202	 17	63.3	11.9	 16
203	 17	145.0	18.2	 16
204	 17	75.0	13.1	 16
205	 17	65.3	13.7	 16
206	 17	81.5	18.3	 16
207	 17	85.8	21.6	 16
208	 17	83.3	13.6	 16
209	 17	65.0	17.5	 16
210	 17	164.3	23.3	 16
211	 17	56.8	10.9	 16
212	 17	222.3	32.4	 16
213	 17	105.8	15.8	 16
214	 17	106.5	17.6	 16
215	 17	66.0	10.5	 16
216	 17	68.8	10.0	 16
217	 17	152.3	23.5	 16
218	 17	55.5	11.9	 16
219	 17	64.0	16.6	 16
220	 17	96.0	14.5	 16
221	 17	63.0	9.8	 16
222	 17	63.3	14.3	 16
223	 17	52.0	10.2	 16
224	 17	84.0	12.3	 16
225	 17	57.5	10.9	 16
226	 17	59.0	7.3	 16
227	 17	54.5	9.9	 16
228	 17	168.0	31.1	 16
229	 17	166.3	26.2	 16
230	 17	84.3	15.4	 16
231	 17	291.0	30.8	 16
232	 17	126.0	17.5	 16
233	 17	944.8	150.5	 16
234	 17	285.5	31.9	 20
235	 17	105.8	23.2	 16
236	 17	68.0	18.9	 16
237	 17	121.0	17.2	 16
238	 17	55.5	10.9	 16
239	 17	146.5	21.7	 16
240	 17	79.8	16.1	 16
241	 17	199.3	41.6	 16
242	 17	116.0	20.9	 16
243	 17	275.0	41.9	 16
244	 17	62.8	15.8	 16
245	 17	208.8	31.4	 16
246	 17	90.8	15.3	 16
247	 17	70.3	12.3	 16
248	 17	96.0	23.8	 16
249	 17	83.3	15.0	 16
250	 17	133.3	22.2	 16
251	 17	129.0	34.3	 16
252	 17	73.0	19.3	 16
253	 17	155.0	22.8	 16
254	 17	85.3	13.5	 16
255	 17	69.0	21.5	 16
256	 17	109.8	15.8	 16
257	 17	121.3	47.9	 16
258	 17	208.0	39.7	 16
259	 17	105.8	17.3	 16
260	 17	111.5	14.6	 16
261	 17	396.8	48.8	 16
262	 17	116.0	16.2	 16
263	 17	65.3	13.7	 16
264	 17	73.5	15.1	 16
265	 17	70.5	14.3	 16
266	 17	71.5	10.2	 16
267	 17	76.0	13.8	 16
268	 17	122.0	17.2	 16
269	 17	200.3	26.4	 16
270	 17	151.3	22.7	 16
271	 17	112.0	14.7	 16
272	 17	123.3	17.2	 16
273	 17	80.5	12.7	 16
274	 17	63.3	14.3	 16
275	 17	249.3	46.4	 16
276	 17	103.3	20.6	 16
277	 17	153.5	24.5	 16
278	 17	106.8	39.2	 16
279	 17	117.3	17.7	 16
280	 17	64.0	22.6	 16
281	 17	61.3	9.4	 16
282	 17	88.3	16.0	 16
283	 17	63.3	11.9	 16
284	 17	77.3	11.8	 16
285	 17	65.5	10.7	 16
286	 17	73.0	14.0	 16
287	 17	121.3	17.8	 16
288	 17	94.8	19.2	 16
289	 17	78.8	13.1	 16
290	 17	141.3	29.5	 16
291	 17	75.5	12.5	 16
292	 17	85.5	14.2	 16
293	 17	64.3	13.7	 16
294	 17	52.3	11.2	 16
295	 17	73.5	16.2	 16
296	 17	90.3	13.5	 16
297	 17	59.0	18.0	 16
298	 17	83.3	13.7	 16
299	 17	78.8	17.2	 16
300	 17	155.3	32.8	 16
301	 17	146.5	28.3	 16
302	 17	200.5	17.4	 16
303	 17	149.3	24.0	 16
304	 17	92.8	21.8	 16
305	 17	180.5	34.7	 16
306	 17	200.0	23.4	 16
307	 17	5094.3	538.3	 16
308	 17	5197.5	315.0	 16
309	 17	4687.8	413.5	 16
310	 17	118.5	18.6	 16
311	 17	77.3	15.2	 16
312	 17	113.0	20.2	 16
313	 17	139.0	17.8	 16
314	 17	116.3	17.8	 16
315	 17	115.0	16.6	 16
316	 17	618.8	49.3	 16
317	 17	102.0	24.9	 16
318	 17	91.3	40.1	 16
319	 17	59.5	11.7	 16
320	 17	86.0	18.8	 16
321	 17	66.8	9.7	 16
322	 17	103.0	17.9	 16
323	 17	76.0	19.9	 16
324	 17	61.8	11.9	 16
325	 17	51.8	7.5	 16
326	 17	56.5	9.0	 16
327	 17	91.0	17.7	 16
328	 17	66.3	10.3	 16
329	 17	69.3	10.2	 16
330	 17	177.5	19.0	 16
331	 17	117.3	18.9	 16
332	 17	143.3	42.7	 16
333	 17	154.5	39.3	 16
334	 17	69.3	14.6	 16
335	 17	317.3	27.6	 16
336	 17	161.0	22.6	 16
337	 17	182.5	16.5	 16
338	 17	177.0	24.3	 16
339	 17	941.3	95.2	 16
340	 17	74.0	13.8	 16
341	 17	71.3	15.0	 16
342	 17	211.5	33.1	 16
343	 17	96.8	13.2	 16
344	 17	165.8	30.0	 16
345	 17	153.5	21.6	 16
346	 17	166.3	27.0	 16
347	 17	87.3	12.0	 16
348	 17	186.5	22.6	 16
349	 17	85.0	15.7	 16
350	 17	71.8	18.5	 16
351	 17	78.5	10.7	 16
352	 17	1148.3	136.8	 16
353	 17	66.8	13.9	 16
354	 17	113.3	21.4	 16
355	 17	79.8	13.6	 16
356	 17	102.5	16.1	 16
357	 17	104.5	16.6	 16
358	 17	84.8	23.9	 16
359	 17	78.3	17.6	 16
360	 17	73.8	12.6	 16
361	 17	139.5	30.5	 16
362	 17	102.5	16.4	 16
363	 17	106.3	17.3	 16
364	 17	114.8	21.0	 16
365	 17	278.3	56.1	 16
366	 17	110.3	16.9	 16
367	 17	69.3	13.1	 16
368	 17	66.3	11.0	 16
369	 17	485.0	104.7	 16
370	 17	61.5	8.6	 16
371	 17	57.3	17.6	 16
372	 17	114.0	49.7	 16
373	 17	62.8	8.7	 16
374	 17	65.5	10.8	 16
375	 17	94.3	17.1	 16
376	 17	144.5	32.7	 16
377	 17	107.8	16.7	 20
378	 17	87.8	16.3	 16
379	 17	55.3	12.3	 16
380	 17	74.0	12.5	 16
381	 17	85.3	17.1	 16
382	 17	57.8	10.3	 16
383	 17	112.3	17.8	 16
384	 17	120.3	16.2	 16
385	 17	391.8	39.4	 16
386	 17	124.3	18.8	 16
387	 17	160.0	22.5	 16
388	 17	56.0	8.6	 16
389	 17	108.3	18.8	 16
390	 17	66.3	9.3	 16
391	 17	75.8	14.3	 16
392	 17	73.3	11.9	 16
393	 17	86.3	13.7	 16
394	 17	95.5	17.0	 16
395	 17	191.8	17.8	 16
396	 17	69.5	10.9	 16
397	 17	51.5	7.4	 16
398	 17	71.3	15.2	 16
399	 17	87.3	19.1	 16
400	 17	70.8	15.2	 16
401	 17	66.0	16.1	 16
402	 17	135.8	29.1	 16
403	 17	107.8	15.5	 16
404	 17	110.3	16.2	 16
405	 17	69.3	10.2	 16
406	 17	64.3	11.6	 16
407	 17	165.5	26.6	 16
408	 17	54.8	9.9	 16
409	 17	52.3	21.2	 16
410	 17	63.3	11.4	 16
411	 17	75.3	9.9	 16
412	 17	107.0	21.4	 16
413	 17	78.3	13.1	 16
414	 17	131.3	13.7	 16
415	 17	134.0	118.2	 16
416	 17	61.3	11.8	 16
417	 17	84.3	14.3	 16
418	 17	185.3	33.4	 16
419	 17	64.0	11.3	 16
420	 17	280.3	39.7	 16
421	 17	79.8	12.2	 16
422	 17	88.8	16.0	 16
423	 17	91.0	14.4	 16
424	 17	109.5	16.3	 16
425	 17	116.5	18.7	 16
426	 17	302.5	34.0	 16
427	 17	140.5	25.7	 16
428	 17	60.5	10.8	 16
429	 17	59.3	11.9	 16
430	 17	181.0	25.3	 16
431	 17	189.3	26.9	 16
432	 17	152.3	22.8	 16
433	 17	72.8	14.6	 16
434	 17	138.5	29.3	 16
435	 17	71.5	12.9	 16
436	 17	98.5	17.1	 16
437	 17	79.5	13.3	 16
438	 17	120.0	17.9	 16
439	 17	70.0	10.8	 16
440	 17	153.0	29.4	 16
441	 17	112.5	15.6	 16
442	 17	166.3	25.0	 16
443	 17	190.0	20.2	 16
444	 17	147.3	26.2	 16
445	 17	92.5	15.8	 16
446	 17	104.5	17.0	 16
447	 17	91.8	13.1	 16
448	 17	76.3	11.7	 16
449	 17	67.0	11.2	 16
450	 17	84.3	21.8	 16
451	 17	90.5	39.0	 16
452	 17	222.5	30.5	 16
453	 17	102.5	16.3	 16
454	 17	83.3	15.7	 16
455	 17	95.0	13.8	 16
456	 17	82.8	17.3	 16
457	 17	68.3	51.3	 16
458	 17	55.3	8.1	 16
459	 17	112.8	19.3	 16
460	 17	120.0	21.4	 16
461	 17	63.0	11.9	 16
462	 17	95.3	13.3	 16
463	 17	108.3	21.7	 16
464	 17	282.0	62.7	 16
465	 17	128.3	28.9	 16
466	 17	49.5	11.5	 16
467	 17	113.8	24.0	 16
468	 17	92.0	13.7	 16
469	 17	58.5	12.2	 16
470	 17	106.8	22.1	 16
471	 17	64.0	11.8	 16
472	 17	91.8	12.8	 16
473	 17	59.5	19.6	 16
474	 17	83.0	14.8	 16
475	 17	157.3	18.5	 16
476	 17	106.5	15.5	 16
477	 17	71.5	12.7	 16
478	 17	145.0	19.6	 16
479	 17	256.3	30.6	 16
480	 17	126.3	20.2	 16
481	 17	83.3	10.0	 16
482	 17	218.8	28.5	 16
483	 17	252.3	29.5	 16
484	 17	83.8	15.0	 16
485	 17	175.3	29.0	 16
486	 17	62.3	16.9	 16
487	 17	173.5	19.8	 16
488	 17	60.8	11.8	 16
489	 17	82.3	15.2	 16
490	 17	69.0	17.6	 16
491	 17	84.5	10.9	 16
492	 17	53.3	8.7	 16
493	 17	101.3	18.0	 16
494	 17	357.0	31.7	 16
495	 17	229.0	24.7	 16
496	 17	104.3	16.0	 16
497	 17	93.8	18.8	 16
498	 17	208.0	143.6	 16
499	 17	169.3	93.1	 16
500	 17	81.5	15.7	 16
501	 17	133.3	19.6	 16
502	 17	88.0	15.2	 16
503	 17	129.3	24.6	 16
504	 17	77.0	11.4	 16
505	 17	62.3	9.7	 16
506	 17	54.3	9.3	 16
507	 17	54.0	9.9	 16
508	 17	66.0	11.4	 16
509	 17	68.0	11.2	 16
510	 17	146.8	20.4	 16
511	 17	168.0	28.3	 16
512	 17	80.8	63.5	 16
513	 17	59.3	7.4	 16
514	 17	63.3	12.0	 16
515	 17	185.0	39.2	 16
516	 17	96.0	13.6	 16
517	 17	68.0	14.1	 16
518	 17	128.8	23.8	 16
519	 17	61.3	10.8	 20
520	 17	79.5	16.7	 16
521	 17	57.3	11.0	 16
522	 17	71.5	12.6	 16
523	 17	133.0	18.5	 16
524	 17	65.5	13.5	 16
525	 17	79.5	9.2	 16
526	 17	153.3	26.0	 16
527	 17	68.5	8.5	 16
528	 17	112.0	30.1	 16
529	 17	91.3	16.5	 16
530	 17	82.0	10.3	 16
531	 17	213.0	29.5	 16
532	 17	57.8	9.9	 16
533	 17	71.3	17.1	 16
534	 17	94.5	14.2	 16
535	 17	48.3	9.2	 16
536	 17	56.0	8.0	 16
537	 17	63.3	8.2	 16
538	 17	69.3	13.9	 16
539	 17	64.3	8.4	 16
540	 17	135.3	18.6	 16
541	 17	128.3	16.2	 16
542	 17	205.3	23.0	 16
543	 17	118.0	15.8	 16
544	 17	73.0	10.5	 16
545	 17	99.8	12.8	 16
546	 17	81.8	12.1	 16
547	 17	83.0	14.3	 16
548	 17	86.0	15.2	 16
549	 17	90.5	17.5	 16
550	 17	157.5	30.1	 16
551	 17	133.5	15.2	 16
552	 17	422.3	71.2	 16
553	 17	178.0	22.0	 16
554	 17	303.5	43.7	 16
555	 17	298.3	43.5	 16
556	 17	119.5	36.4	 16
557	 17	82.8	16.9	 16
558	 17	143.0	14.1	 16
559	 17	647.3	50.8	 16
560	 17	108.0	22.0	 16
561	 17	63.5	11.4	 16
562	 17	95.3	43.0	 16
563	 17	142.0	24.0	 16
564	 17	994.3	131.1	 16
565	 17	87.3	15.8	 16
566	 17	82.8	11.9	 16
567	 17	89.3	12.7	 16
568	 17	65.3	15.0	 16
569	 17	343.5	78.1	 16
570	 17	63.5	10.4	 16
571	 17	60.0	21.5	 16
572	 17	60.8	8.4	 16
573	 17	133.5	18.0	 16
574	 17	102.5	17.3	 16
575	 17	344.3	37.0	 16
576	 17	310.3	47.5	 16
577	 17	80.0	19.6	 16
578	 17	84.3	15.1	 16
579	 17	217.3	37.3	 16
580	 17	705.8	78.6	 16
581	 17	171.0	33.6	 16
582	 17	226.3	24.0	 16
583	 17	103.0	20.7	 16
584	 17	760.3	104.5	 16
585	 17	345.3	51.9	 16
586	 17	101.0	17.1	 16
587	 17	71.5	12.3	 16
588	 17	71.5	11.8	 16
589	 17	126.5	15.1	 16
590	 17	271.3	60.3	 16
591	 17	66.3	11.5	 16
592	 17	81.8	15.9	 16
593	 17	271.3	52.1	 16
594	 17	74.0	11.3	 16
595	 17	94.3	14.3	 16
596	 17	255.0	46.4	 16
597	 17	267.5	30.7	 16
598	 17	96.5	32.5	 16
599	 17	109.8	17.9	 16
600	 17	127.3	24.1	 16
601	 17	329.3	29.0	 16
602	 17	821.3	90.2	 16
603	 17	118.0	14.3	 16
604	 17	206.0	24.7	 16
605	 17	131.3	10.1	 16
606	 17	108.8	19.5	 16
607	 17	89.3	11.5	 16
608	 17	146.5	18.2	 16
609	 17	66.3	11.3	 16
610	 17	85.0	14.8	 16
611	 17	178.8	17.9	 16
612	 17	60.5	14.5	 16
613	 17	60.3	9.2	 16
614	 17	57.5	9.9	 16
615	 17	388.3	67.9	 16
616	 17	96.0	21.4	 16
617	 17	144.3	23.8	 16
618	 17	334.5	43.1	 16
619	 17	195.3	32.0	 16
620	 17	155.8	27.0	 16
621	 17	235.3	36.3	 16
622	 17	344.5	34.3	 16
623	 17	254.5	43.5	 16
624	 17	165.0	31.2	 16
625	 17	138.3	18.1	 16
626	 17	100.8	22.9	 16
627	 17	88.0	16.0	 16
628	 17	120.5	17.1	 16
629	 17	153.0	27.4	 16
630	 17	120.3	19.0	 16
631	 17	83.5	9.6	 16
632	 17	53.0	8.6	 16
633	 17	127.5	20.0	 16
634	 17	128.5	22.2	 16
635	 17	143.3	24.3	 16
636	 17	59.8	11.6	 16
637	 17	71.5	10.4	 16
638	 17	80.0	14.0	 16
639	 17	422.8	79.2	 16
640	 17	144.5	21.0	 16
641	 17	215.0	34.0	 16
642	 17	210.0	34.1	 16
643	 17	165.8	42.6	 16
644	 17	75.3	14.3	 16
645	 17	312.8	70.4	 16
646	 17	155.0	30.8	 16
647	 17	203.0	31.2	 16
648	 17	188.5	24.8	 16
649	 17	212.0	28.7	 16
650	 17	134.5	27.6	 16
651	 17	82.8	15.0	 16
652	 17	102.0	18.2	 16
653	 17	173.8	28.5	 16
654	 17	170.3	29.8	 16
655	 17	76.0	12.8	 16
656	 17	53.8	11.8	 16
657	 17	112.5	22.4	 16
658	 17	58.5	9.3	 16
659	 17	201.8	37.4	 16
660	 17	82.3	16.4	 16
661	 17	148.8	70.6	 20
662	 17	205.3	40.5	 16
663	 17	100.8	20.0	 16
664	 17	66.8	17.3	 16
665	 17	74.3	14.4	 16
666	 17	410.8	42.6	 16
667	 17	180.3	22.8	 16
668	 17	62.5	11.0	 16
669	 17	66.8	9.5	 16
670	 17	88.8	14.9	 16
671	 17	1143.3	165.2	 16
672	 17	1182.3	158.7	 16
673	 17	77.3	21.0	 16
674	 17	187.8	59.8	 16
675	 17	291.0	41.5	 16
676	 17	179.3	20.3	 16
677	 17	347.5	48.6	 16
678	 17	113.3	21.0	 16
679	 17	133.0	22.7	 16
680	 17	152.8	28.1	 16
681	 17	124.8	12.6	 16
682	 17	97.5	16.6	 16
683	 17	96.8	13.7	 16
684	 17	186.0	50.9	 16
685	 17	209.3	31.2	 16
686	 17	116.3	21.4	 16
687	 17	274.8	35.7	 16
688	 17	325.3	59.4	 16
689	 17	70.0	10.8	 16
690	 17	96.8	12.5	 16
691	 17	184.8	25.3	 16
692	 17	210.0	24.1	 16
693	 17	199.5	24.7	 16
694	 17	243.0	35.3	 16
695	 17	95.0	20.2	 16
696	 17	137.3	24.4	 16
697	 17	196.5	23.0	 16
698	 17	279.8	33.5	 16
699	 17	95.5	10.9	 16
700	 17	85.3	18.9	 16
701	 17	96.5	10.7	 16
702	 17	262.3	30.8	 16
703	 17	135.8	21.6	 16
704	 17	134.0	12.8	 16
705	 17	113.3	17.0	 16
706	 17	99.3	17.4	 16
707	 17	153.5	23.5	 16
708	 17	69.0	10.8	 16
709	 17	116.0	16.8	 16
710	 17	151.8	56.1	 16
711	 17	108.3	16.5	 16
  0	 18	7970.3	861.7	 16
  1	 18	111.0	26.3	 16
  2	 18	59.3	10.6	 16
  3	 18	133.5	17.1	 16
  4	 18	82.8	14.9	 16
  5	 18	147.3	21.7	 16
  6	 18	141.5	20.0	 16
  7	 18	92.8	21.3	 16
  8	 18	104.0	17.1	 16
  9	 18	67.8	11.1	 16
 10	 18	58.5	7.5	 16
 11	 18	102.3	64.1	 16
 12	 18	85.0	18.4	 16
 13	 18	78.0	13.0	 16
 14	 18	81.8	11.7	 16
 15	 18	72.3	23.4	 16
 16	 18	205.5	31.9	 16
 17	 18	94.5	19.4	 16
 18	 18	216.5	39.9	 16
 19	 18	125.0	24.5	 16
 20	 18	81.0	11.5	 16
 21	 18	103.0	15.1	 16
 22	 18	81.0	32.0	 16
 23	 18	68.5	9.2	 16
 24	 18	125.0	25.2	 16
 25	 18	71.5	11.8	 16
 26	 18	99.8	27.8	 16
 27	 18	54.8	12.9	 16
 28	 18	77.3	17.8	 16
 29	 18	72.3	78.3	 16
 30	 18	56.5	14.8	 16
 31	 18	54.3	7.6	 16
 32	 18	61.3	8.7	 16
 33	 18	56.3	12.7	 16
 34	 18	86.0	15.4	 16
 35	 18	169.0	29.6	 16
 36	 18	69.3	13.8	 16
 37	 18	100.3	13.0	 16
 38	 18	69.8	11.2	 16
 39	 18	82.8	9.6	 16
 40	 18	57.5	8.2	 16
 41	 18	86.0	16.2	 16
 42	 18	55.5	10.1	 16
 43	 18	75.0	16.8	 16
 44	 18	150.0	21.9	 16
 45	 18	230.0	34.6	 16
 46	 18	112.5	20.6	 16
 47	 18	98.5	17.4	 16
 48	 18	77.3	10.6	 16
 49	 18	74.0	10.8	 16
 50	 18	83.5	13.3	 16
 51	 18	117.0	22.0	 16
 52	 18	77.3	16.1	 16
 53	 18	63.8	14.9	 16
 54	 18	61.0	14.4	 16
 55	 18	65.3	9.2	 16
 56	 18	131.0	21.8	 16
 57	 18	69.0	14.6	 16
 58	 18	69.3	11.1	 16
 59	 18	62.5	13.8	 16
 60	 18	85.5	14.3	 16
 61	 18	114.5	25.7	 16
 62	 18	72.8	16.3	 16
 63	 18	234.3	27.6	 16
 64	 18	106.5	13.1	 16
 65	 18	74.8	15.8	 16
 66	 18	85.0	25.8	 16
 67	 18	79.0	11.8	 16
 68	 18	70.3	11.5	 16
 69	 18	312.3	41.1	 16
 70	 18	294.5	39.4	 16
 71	 18	141.0	52.9	 16
 72	 18	107.0	19.6	 16
 73	 18	93.3	22.3	 16
 74	 18	112.3	16.2	 16
 75	 18	76.0	15.2	 16
 76	 18	118.0	17.1	 16
 77	 18	123.3	20.6	 16
 78	 18	126.3	32.7	 16
 79	 18	115.3	16.2	 16
 80	 18	122.0	30.1	 16
 81	 18	62.0	10.0	 16
 82	 18	69.5	16.1	 16
 83	 18	79.5	16.3	 16
 84	 18	64.3	16.1	 16
 85	 18	62.3	11.7	 16
 86	 18	62.8	13.1	 16
 87	 18	91.3	15.3	 16
 88	 18	140.5	25.3	 16
 89	 18	152.5	16.4	 16
 90	 18	93.5	16.4	 16
 91	 18	195.3	26.0	 16
 92	 18	216.3	50.3	 16
 93	 18	156.0	14.0	 20
 94	 18	62.0	12.7	 16
 95	 18	130.5	17.9	 16
 96	 18	265.0	30.6	 16
 97	 18	180.0	32.6	 16
 98	 18	124.3	28.9	 16
 99	 18	149.5	19.9	 16
100	 18	237.0	34.2	 16
101	 18	154.3	27.8	 16
102	 18	120.5	21.3	 16
103	 18	85.0	15.1	 16
104	 18	88.8	110.9	 16
105	 18	111.3	15.8	 16
106	 18	73.3	10.8	 16
107	 18	62.0	13.3	 16
108	 18	94.5	20.0	 16
109	 18	98.5	17.4	 16
110	 18	95.3	14.9	 16
111	 18	122.0	15.7	 16
112	 18	231.5	32.3	 16
113	 18	64.3	10.1	 16
114	 18	54.3	10.2	 16
115	 18	177.5	32.8	 16
116	 18	155.0	21.6	 16
117	 18	136.3	15.8	 16
118	 18	109.0	20.3	 16
119	 18	121.0	20.1	 16
120	 18	83.3	14.8	 16
121	 18	64.0	14.0	 16
122	 18	61.0	12.4	 16
123	 18	77.0	15.3	 16
124	 18	125.8	21.3	 16
125	 18	105.0	18.9	 16
126	 18	159.3	18.7	 16
127	 18	99.0	16.3	 16
128	 18	64.3	13.4	 16
129	 18	70.0	17.2	 16
130	 18	63.3	13.9	 16
131	 18	134.5	19.3	 16
132	 18	69.3	10.2	 16
133	 18	71.3	9.7	 16
134	 18	74.3	13.2	 16
135	 18	72.0	10.6	 16
136	 18	88.5	22.0	 16
137	 18	71.3	9.3	 16
138	 18	66.3	10.2	 16
139	 18	60.3	8.6	 16
140	 18	66.5	11.3	 16
141	 18	61.5	12.2	 16
142	 18	89.5	17.0	 16
143	 18	55.3	9.6	 16
144	 18	84.5	15.7	 16
145	 18	140.3	103.4	 16
146	 18	75.3	15.3	 16
147	 18	68.5	16.9	 16
148	 18	74.3	10.9	 16
149	 18	69.0	18.0	 16
150	 18	66.0	9.9	 16
151	 18	73.8	13.9	 16
152	 18	98.3	22.9	 16
153	 18	80.0	13.9	 16
154	 18	88.5	17.7	 16
155	 18	73.0	12.1	 16
156	 18	86.0	12.9	 16
157	 18	167.8	23.7	 16
158	 18	84.8	20.2	 16
159	 18	104.3	19.2	 16
160	 18	178.5	24.0	 16
161	 18	105.0	18.5	 16
162	 18	130.0	20.4	 16
163	 18	80.5	17.4	 16
164	 18	231.5	156.8	 16
165	 18	63.3	8.6	 16
166	 18	83.8	22.1	 16
167	 18	84.5	38.8	 16
168	 18	102.0	37.2	 16
169	 18	71.3	12.2	 16
170	 18	131.3	18.0	 16
171	 18	83.0	14.2	 16
172	 18	314.8	22.1	 16
173	 18	144.8	21.2	 16
174	 18	111.8	22.2	 16
175	 18	191.0	26.5	 16
176	 18	473.5	56.6	 16
177	 18	313.3	21.8	 16
178	 18	741.5	83.7	 16
179	 18	295.5	34.5	 16
180	 18	132.0	103.5	 16
181	 18	97.5	20.7	 16
182	 18	132.5	22.5	 16
183	 18	98.0	15.6	 16
184	 18	87.0	14.0	 16
185	 18	95.0	95.3	 16
186	 18	72.5	16.7	 16
187	 18	81.5	20.4	 16
188	 18	57.5	13.6	 16
189	 18	95.3	18.5	 16
190	 18	68.3	11.9	 16
191	 18	88.3	8.9	 16
192	 18	84.3	20.9	 16
193	 18	148.5	17.0	 16
194	 18	1242.0	115.0	 16
195	 18	208.3	20.6	 16
196	 18	100.5	58.8	 16
197	 18	54.0	12.0	 16
198	 18	79.0	18.9	 16
199	 18	101.5	18.9	 16
200	 18	126.5	21.0	 16
201	 18	104.5	12.5	 16
202	 18	84.0	14.6	 16
203	 18	120.5	19.2	 16
204	 18	74.0	21.7	 16
205	 18	87.0	18.0	 16
206	 18	133.5	25.9	 16
207	 18	61.5	13.3	 16
208	 18	48.0	12.7	 16
209	 18	65.0	11.8	 16
210	 18	127.3	25.7	 16
211	 18	70.5	14.1	 16
212	 18	92.0	16.3	 16
213	 18	73.5	12.2	 16
214	 18	72.3	12.6	 16
215	 18	57.3	9.4	 16
216	 18	63.0	11.8	 16
217	 18	87.5	13.9	 16
218	 18	59.5	10.3	 16
219	 18	119.3	146.7	 16
220	 18	75.0	11.2	 16
221	 18	55.3	9.8	 16
222	 18	71.0	20.9	 16
223	 18	55.8	7.8	 16
224	 18	57.5	14.5	 16
225	 18	55.3	11.8	 16
226	 18	71.5	14.0	 16
227	 18	51.3	23.6	 16
228	 18	85.5	18.7	 16
229	 18	94.5	14.7	 16
230	 18	59.3	77.6	 16
231	 18	333.0	41.1	 16
232	 18	111.0	16.1	 16
233	 18	262.8	25.3	 16
234	 18	253.8	30.0	 16
235	 18	86.8	15.7	 20
236	 18	61.5	15.4	 16
237	 18	151.8	22.9	 16
238	 18	57.0	11.5	 16
239	 18	105.3	15.0	 16
240	 18	69.3	17.6	 16
241	 18	61.3	9.9	 16
242	 18	141.5	19.2	 16
243	 18	381.0	45.0	 16
244	 18	79.0	10.9	 16
245	 18	101.8	30.9	 16
246	 18	55.3	7.7	 16
247	 18	58.3	13.1	 16
248	 18	103.3	18.9	 16
249	 18	64.8	16.1	 16
250	 18	64.3	8.9	 16
251	 18	58.0	11.6	 16
252	 18	101.0	23.3	 16
253	 18	70.5	9.5	 16
254	 18	77.0	13.3	 16
255	 18	74.5	16.4	 16
256	 18	106.5	21.0	 16
257	 18	70.8	9.9	 16
258	 18	172.5	26.3	 16
259	 18	80.0	12.9	 16
260	 18	91.0	13.2	 16
261	 18	515.8	47.2	 16
262	 18	140.8	21.4	 16
263	 18	74.8	18.3	 16
264	 18	72.3	12.3	 16
265	 18	86.3	16.7	 16
266	 18	76.5	16.8	 16
267	 18	71.3	11.8	 16
268	 18	95.0	11.0	 16
269	 18	188.8	19.8	 16
270	 18	135.3	13.3	 16
271	 18	63.8	15.0	 16
272	 18	68.3	11.9	 16
273	 18	64.3	13.1	 16
274	 18	63.0	10.5	 16
275	 18	92.3	16.7	 16
276	 18	103.0	15.1	 16
277	 18	88.3	8.2	 16
278	 18	81.8	15.1	 16
279	 18	91.3	12.6	 16
280	 18	61.0	10.2	 16
281	 18	60.0	14.6	 16
282	 18	82.8	17.8	 16
283	 18	61.3	12.1	 16
284	 18	80.0	18.8	 16
285	 18	53.3	9.3	 16
286	 18	78.3	20.7	 16
287	 18	78.5	15.2	 16
288	 18	103.8	38.7	 16
289	 18	71.5	13.4	 16
290	 18	114.0	20.9	 16
291	 18	100.0	21.2	 16
292	 18	82.3	13.7	 16
293	 18	61.8	12.0	 16
294	 18	59.3	10.7	 16
295	 18	71.5	12.9	 16
296	 18	70.3	8.7	 16
297	 18	61.8	11.3	 16
298	 18	61.8	9.4	 16
299	 18	65.8	12.0	 16
300	 18	79.8	16.6	 16
301	 18	87.0	11.8	 16
302	 18	65.0	11.4	 16
303	 18	91.0	17.7	 16
304	 18	121.5	18.8	 16
305	 18	62.5	11.3	 16
306	 18	81.5	18.3	 16
307	 18	523.8	96.8	 16
308	 18	656.3	62.8	 16
309	 18	552.8	78.2	 16
310	 18	86.3	20.1	 16
311	 18	63.0	13.0	 16
312	 18	108.5	17.9	 16
313	 18	123.3	18.3	 16
314	 18	126.3	24.1	 16
315	 18	158.3	20.0	 16
316	 18	463.3	57.8	 16
317	 18	80.8	13.4	 16
318	 18	72.3	12.7	 16
319	 18	60.3	9.9	 16
320	 18	65.3	16.3	 16
321	 18	70.3	12.0	 16
322	 18	102.0	18.2	 16
323	 18	68.5	12.1	 16
324	 18	53.0	8.9	 16
325	 18	50.5	11.6	 16
326	 18	63.3	13.0	 16
327	 18	58.3	8.2	 16
328	 18	74.3	29.2	 16
329	 18	73.0	21.2	 16
330	 18	77.0	10.7	 16
331	 18	100.0	17.5	 16
332	 18	71.5	14.6	 16
333	 18	106.5	19.5	 16
334	 18	76.8	14.4	 16
335	 18	125.3	22.0	 16
336	 18	93.3	10.1	 16
337	 18	60.3	10.2	 16
338	 18	121.3	27.5	 16
339	 18	330.8	42.5	 16
340	 18	77.3	14.8	 16
341	 18	61.3	11.6	 16
342	 18	132.3	25.4	 16
343	 18	82.5	13.3	 16
344	 18	101.3	20.3	 16
345	 18	98.5	16.4	 16
346	 18	110.3	14.4	 16
347	 18	230.0	29.0	 16
348	 18	175.0	40.8	 16
349	 18	144.3	21.3	 16
350	 18	61.5	11.5	 16
351	 18	62.8	11.1	 16
352	 18	587.0	60.3	 16
353	 18	69.0	14.5	 16
354	 18	152.3	24.5	 16
355	 18	69.3	16.0	 16
356	 18	66.5	11.6	 16
357	 18	77.0	9.8	 16
358	 18	75.0	13.6	 16
359	 18	79.5	14.2	 16
360	 18	83.3	18.1	 16
361	 18	75.5	8.2	 16
362	 18	68.3	16.6	 16
363	 18	113.0	12.4	 16
364	 18	135.3	16.9	 16
365	 18	97.8	22.8	 16
366	 18	79.8	15.2	 16
367	 18	61.5	13.8	 16
368	 18	58.8	11.6	 16
369	 18	149.5	27.1	 16
370	 18	61.8	12.9	 16
371	 18	62.0	8.7	 16
372	 18	86.8	32.4	 16
373	 18	59.5	13.0	 16
374	 18	61.8	12.8	 16
375	 18	71.5	12.1	 16
376	 18	53.0	11.1	 16
377	 18	108.3	16.1	 16
378	 18	56.3	11.7	 20
379	 18	79.3	33.1	 16
380	 18	79.8	13.7	 16
381	 18	173.8	32.5	 16
382	 18	75.0	18.5	 16
383	 18	105.0	19.4	 16
384	 18	88.3	14.5	 16
385	 18	671.5	60.4	 16
386	 18	174.5	17.7	 16
387	 18	93.8	14.3	 16
388	 18	54.3	11.7	 16
389	 18	124.0	19.6	 16
390	 18	63.8	11.8	 16
391	 18	80.3	11.5	 16
392	 18	64.8	13.9	 16
393	 18	81.0	13.1	 16
394	 18	74.0	10.7	 16
395	 18	142.8	26.3	 16
396	 18	87.0	14.2	 16
397	 18	53.3	8.4	 16
398	 18	60.0	14.4	 16
399	 18	70.3	30.5	 16
400	 18	62.3	13.0	 16
401	 18	63.0	8.9	 16
402	 18	127.3	19.5	 16
403	 18	104.5	13.9	 16
404	 18	246.0	44.0	 16
405	 18	162.0	145.5	 16
406	 18	48.0	9.9	 16
407	 18	82.0	15.5	 16
408	 18	58.5	11.6	 16
409	 18	56.5	7.8	 16
410	 18	55.3	9.4	 16
411	 18	53.3	10.9	 16
412	 18	97.0	14.2	 16
413	 18	96.3	19.6	 16
414	 18	123.5	23.1	 16
415	 18	64.3	13.5	 16
416	 18	54.0	9.3	 16
417	 18	52.8	10.4	 16
418	 18	77.0	12.5	 16
419	 18	57.0	9.1	 16
420	 18	76.0	16.2	 16
421	 18	75.0	11.6	 16
422	 18	137.3	20.2	 16
423	 18	122.8	20.4	 16
424	 18	132.3	43.7	 16
425	 18	93.0	16.5	 16
426	 18	171.0	25.8	 16
427	 18	125.0	18.5	 16
428	 18	67.5	15.8	 16
429	 18	76.8	50.7	 16
430	 18	132.8	20.6	 16
431	 18	180.3	20.5	 16
432	 18	126.3	18.6	 16
433	 18	69.5	15.5	 16
434	 18	82.5	16.9	 16
435	 18	76.3	11.0	 16
436	 18	73.0	15.3	 16
437	 18	81.3	14.1	 16
438	 18	72.3	12.4	 16
439	 18	71.3	64.7	 16
440	 18	81.5	15.2	 16
441	 18	78.5	15.6	 16
442	 18	187.8	18.7	 16
443	 18	203.0	25.3	 16
444	 18	101.0	12.8	 16
445	 18	86.8	16.6	 16
446	 18	91.0	9.6	 16
447	 18	67.3	12.7	 16
448	 18	84.0	14.2	 16
449	 18	58.0	12.7	 16
450	 18	65.8	11.3	 16
451	 18	82.3	17.5	 16
452	 18	139.0	19.5	 16
453	 18	113.0	22.5	 16
454	 18	91.3	14.3	 16
455	 18	96.5	46.5	 16
456	 18	62.5	10.3	 16
457	 18	59.5	19.5	 16
458	 18	59.5	11.8	 16
459	 18	69.5	11.6	 16
460	 18	80.0	13.3	 16
461	 18	79.8	15.5	 16
462	 18	133.5	25.2	 16
463	 18	136.8	18.4	 16
464	 18	106.0	29.5	 16
465	 18	81.5	18.6	 16
466	 18	53.3	9.4	 16
467	 18	139.0	15.9	 16
468	 18	102.3	19.0	 16
469	 18	68.0	13.1	 16
470	 18	97.5	18.8	 16
471	 18	70.5	11.0	 16
472	 18	77.0	16.5	 16
473	 18	56.5	6.9	 16
474	 18	66.5	13.7	 16
475	 18	183.3	33.7	 16
476	 18	82.0	13.1	 16
477	 18	72.5	11.6	 16
478	 18	139.8	28.2	 16
479	 18	153.3	17.3	 16
480	 18	105.0	20.9	 16
481	 18	108.0	26.6	 16
482	 18	223.5	31.8	 16
483	 18	101.5	16.7	 16
484	 18	58.0	10.5	 16
485	 18	168.3	22.4	 16
486	 18	67.3	10.3	 16
487	 18	216.0	31.3	 16
488	 18	60.3	13.6	 16
489	 18	75.5	10.2	 16
490	 18	99.5	22.5	 16
491	 18	74.3	11.8	 16
492	 18	72.0	16.7	 16
493	 18	85.0	12.3	 16
494	 18	280.8	28.8	 16
495	 18	155.8	22.9	 16
496	 18	83.8	12.4	 16
497	 18	64.5	12.6	 16
498	 18	168.5	20.1	 16
499	 18	87.5	14.3	 16
500	 18	283.5	225.8	 16
501	 18	62.3	13.1	 16
502	 18	74.0	11.3	 16
503	 18	91.3	16.5	 16
504	 18	74.8	15.4	 16
505	 18	54.3	8.1	 16
506	 18	55.5	11.0	 16
507	 18	57.8	11.2	 16
508	 18	63.3	11.7	 16
509	 18	61.0	14.1	 16
510	 18	68.3	12.9	 16
511	 18	156.8	17.4	 16
512	 18	58.3	14.8	 16
513	 18	56.8	12.4	 16
514	 18	65.3	14.4	 16
515	 18	138.0	29.5	 16
516	 18	97.0	19.9	 16
517	 18	63.0	13.2	 16
518	 18	74.0	13.5	 16
519	 18	56.0	9.7	 16
520	 18	66.0	14.2	 20
521	 18	66.5	12.1	 16
522	 18	66.3	11.5	 16
523	 18	111.0	15.4	 16
524	 18	53.3	9.2	 16
525	 18	73.3	18.0	 16
526	 18	58.3	9.3	 16
527	 18	48.5	8.2	 16
528	 18	100.0	15.3	 16
529	 18	70.8	13.8	 16
530	 18	57.8	11.6	 16
531	 18	67.0	13.9	 16
532	 18	56.0	6.3	 16
533	 18	73.3	12.0	 16
534	 18	86.8	15.9	 16
535	 18	58.3	11.1	 16
536	 18	63.3	13.0	 16
537	 18	70.3	17.2	 16
538	 18	72.0	13.9	 16
539	 18	148.5	131.6	 16
540	 18	156.3	23.0	 16
541	 18	215.8	25.5	 16
542	 18	208.8	26.1	 16
543	 18	111.5	15.7	 16
544	 18	60.0	9.6	 16
545	 18	110.8	17.5	 16
546	 18	147.3	18.2	 16
547	 18	148.3	19.6	 16
548	 18	84.5	15.0	 16
549	 18	111.5	40.4	 16
550	 18	286.0	35.2	 16
551	 18	93.8	15.7	 16
552	 18	121.0	17.7	 16
553	 18	68.8	12.5	 16
554	 18	90.3	15.6	 16
555	 18	109.8	17.1	 16
556	 18	130.3	15.6	 16
557	 18	63.0	13.9	 16
558	 18	87.3	12.5	 16
559	 18	504.5	55.1	 16
560	 18	109.0	23.8	 16
561	 18	64.3	13.2	 16
562	 18	66.3	14.5	 16
563	 18	145.0	24.9	 16
564	 18	147.3	25.4	 16
565	 18	63.3	8.8	 16
566	 18	76.3	18.5	 16
567	 18	162.0	182.7	 16
568	 18	61.5	10.6	 16
569	 18	78.8	15.5	 16
570	 18	58.3	11.6	 16
571	 18	62.5	8.0	 16
572	 18	82.8	16.5	 16
573	 18	130.3	19.3	 16
574	 18	112.3	19.5	 16
575	 18	348.0	29.0	 16
576	 18	296.3	45.5	 16
577	 18	120.0	23.7	 16
578	 18	81.0	13.6	 16
579	 18	108.0	15.1	 16
580	 18	482.0	47.8	 16
581	 18	170.0	31.5	 16
582	 18	186.5	24.7	 16
583	 18	75.5	9.7	 16
584	 18	205.0	28.1	 16
585	 18	208.8	28.7	 16
586	 18	115.5	19.3	 16
587	 18	58.5	9.2	 16
588	 18	69.5	18.1	 16
589	 18	133.0	19.6	 16
590	 18	115.0	16.0	 16
591	 18	77.5	15.8	 16
592	 18	71.5	11.7	 16
593	 18	68.0	18.0	 16
594	 18	85.5	24.3	 16
595	 18	97.0	21.0	 16
596	 18	317.0	43.4	 16
597	 18	154.0	22.2	 16
598	 18	96.8	20.0	 16
599	 18	92.3	16.9	 16
600	 18	103.0	18.9	 16
601	 18	345.8	42.5	 16
602	 18	688.0	88.3	 16
603	 18	126.8	16.0	 16
604	 18	155.3	33.6	 16
605	 18	99.0	14.4	 16
606	 18	110.3	17.7	 16
607	 18	65.3	11.9	 16
608	 18	113.0	13.6	 16
609	 18	78.5	12.0	 16
610	 18	60.0	8.3	 16
611	 18	124.0	18.4	 16
612	 18	59.8	11.4	 16
613	 18	59.0	9.0	 16
614	 18	79.3	11.8	 16
615	 18	151.8	27.4	 16
616	 18	170.3	26.3	 16
617	 18	154.3	22.6	 16
618	 18	130.3	22.6	 16
619	 18	90.5	11.5	 16
620	 18	338.0	53.4	 16
621	 18	103.0	17.9	 16
622	 18	437.0	49.7	 16
623	 18	117.3	65.7	 16
624	 18	108.0	17.8	 16
625	 18	321.0	42.1	 16
626	 18	92.0	12.3	 16
627	 18	67.8	10.2	 16
628	 18	233.8	33.0	 16
629	 18	156.5	23.0	 16
630	 18	140.0	127.5	 16
631	 18	106.3	24.1	 16
632	 18	59.3	9.3	 16
633	 18	77.3	13.0	 16
634	 18	89.8	14.5	 16
635	 18	102.5	19.1	 16
636	 18	65.3	11.9	 16
637	 18	77.5	15.7	 16
638	 18	81.3	35.9	 16
639	 18	179.3	25.6	 16
640	 18	109.5	18.4	 16
641	 18	92.3	15.2	 16
642	 18	157.3	25.8	 16
643	 18	119.3	13.4	 16
644	 18	58.3	11.4	 16
645	 18	80.5	11.2	 16
646	 18	98.3	16.0	 16
647	 18	224.3	96.7	 16
648	 18	182.8	33.5	 16
649	 18	190.3	27.9	 16
650	 18	167.3	36.3	 16
651	 18	74.0	14.0	 16
652	 18	88.3	22.0	 16
653	 18	140.3	20.2	 16
654	 18	114.0	13.5	 16
655	 18	81.3	22.5	 16
656	 18	62.3	10.1	 16
657	 18	175.0	24.1	 16
658	 18	64.3	13.5	 16
659	 18	87.5	13.7	 16
660	 18	68.3	12.5	 16
661	 18	65.8	10.0	 16
662	 18	103.5	14.6	 20
663	 18	79.3	14.0	 16
664	 18	64.3	8.6	 16
665	 18	74.5	14.5	 16
666	 18	121.3	20.8	 16
667	 18	60.0	10.7	 16
668	 18	62.5	24.1	 16
669	 18	68.0	9.0	 16
670	 18	58.3	10.7	 16
671	 18	359.8	58.3	 16
672	 18	381.0	52.0	 16
673	 18	61.8	20.4	 16
674	 18	97.0	16.0	 16
675	 18	345.0	39.4	 16
676	 18	120.3	16.9	 16
677	 18	739.3	57.5	 16
678	 18	87.0	13.7	 16
679	 18	105.5	32.7	 16
680	 18	87.3	12.3	 16
681	 18	135.3	24.4	 16
682	 18	81.8	27.7	 16
683	 18	87.3	13.8	 16
684	 18	139.5	17.6	 16
685	 18	135.3	16.6	 16
686	 18	128.3	20.8	 16
687	 18	220.3	16.9	 16
688	 18	282.0	40.8	 16
689	 18	81.3	13.4	 16
690	 18	107.8	17.6	 16
691	 18	82.0	21.3	 16
692	 18	158.0	31.1	 16
693	 18	180.8	20.6	 16
694	 18	85.3	15.1	 16
695	 18	68.0	12.7	 16
696	 18	828.8	145.4	 16
697	 18	125.8	22.7	 16
698	 18	138.8	44.8	 16
699	 18	75.3	13.0	 16
700	 18	63.5	12.6	 16
701	 18	92.3	14.9	 16
702	 18	233.0	37.2	 16
703	 18	62.3	7.5	 16
704	 18	256.0	37.1	 16
705	 18	195.0	29.3	 16
706	 18	123.8	21.3	 16
707	 18	144.0	18.1	 16
708	 18	73.5	11.9	 16
709	 18	87.8	17.1	 16
710	 18	537.3	72.2	 16
711	 18	8170.0	1118.6	 16
  0	 19	98.3	13.2	 16
  1	 19	96.8	15.4	 16
  2	 19	77.5	13.7	 16
  3	 19	277.0	40.0	 16
  4	 19	162.3	26.5	 16
  5	 19	154.3	21.3	 16
  6	 19	76.0	13.2	 16
  7	 19	70.0	11.2	 16
  8	 19	119.0	21.0	 16
  9	 19	69.3	14.9	 16
 10	 19	69.0	10.5	 16
 11	 19	167.3	31.8	 16
 12	 19	181.0	24.6	 16
 13	 19	113.5	18.9	 16
 14	 19	184.0	29.1	 16
 15	 19	209.0	29.2	 16
 16	 19	271.0	28.1	 16
 17	 19	191.5	32.1	 16
 18	 19	191.5	31.5	 16
 19	 19	159.5	28.0	 16
 20	 19	96.0	16.9	 16
 21	 19	128.0	13.3	 16
 22	 19	192.8	25.3	 16
 23	 19	192.8	29.1	 16
 24	 19	401.0	41.4	 16
 25	 19	119.0	18.4	 16
 26	 19	116.3	54.5	 16
 27	 19	362.8	63.8	 16
 28	 19	68.5	25.9	 16
 29	 19	55.5	14.1	 16
 30	 19	66.8	11.6	 16
 31	 19	175.3	24.7	 16
 32	 19	67.5	9.4	 16
 33	 19	74.5	13.7	 16
 34	 19	137.5	22.9	 16
 35	 19	183.0	26.0	 16
 36	 19	250.5	46.5	 16
 37	 19	137.0	19.5	 16
 38	 19	1902.5	261.1	 16
 39	 19	353.0	24.3	 16
 40	 19	167.8	32.5	 16
 41	 19	74.0	25.7	 16
 42	 19	74.5	14.9	 16
 43	 19	129.5	22.2	 16
 44	 19	342.0	60.4	 16
 45	 19	103.8	15.4	 16
 46	 19	161.3	18.8	 16
 47	 19	327.0	38.2	 16
 48	 19	166.8	25.1	 16
 49	 19	652.8	93.9	 16
 50	 19	80.8	15.0	 16
 51	 19	173.8	26.4	 16
 52	 19	94.5	9.1	 16
 53	 19	226.5	22.9	 16
 54	 19	170.3	58.6	 16
 55	 19	320.8	44.5	 16
 56	 19	525.5	53.4	 16
 57	 19	114.0	10.2	 16
 58	 19	220.0	35.3	 16
 59	 19	196.0	32.1	 16
 60	 19	213.5	34.2	 16
 61	 19	264.8	52.6	 16
 62	 19	179.5	20.0	 16
 63	 19	334.8	48.2	 16
 64	 19	201.5	20.7	 16
 65	 19	140.8	18.3	 16
 66	 19	109.5	19.9	 16
 67	 19	82.5	12.3	 16
 68	 19	119.8	25.6	 16
 69	 19	215.5	31.2	 16
 70	 19	422.0	61.7	 16
 71	 19	761.5	75.6	 16
 72	 19	247.3	23.8	 16
 73	 19	242.8	30.6	 16
 74	 19	271.8	38.1	 16
 75	 19	73.3	12.3	 16
 76	 19	82.0	12.2	 16
 77	 19	287.8	30.8	 16
 78	 19	102.5	20.4	 16
 79	 19	78.8	10.1	 16
 80	 19	94.5	22.6	 16
 81	 19	79.5	15.5	 16
 82	 19	82.0	16.0	 16
 83	 19	384.3	55.3	 16
 84	 19	109.3	30.2	 16
 85	 19	169.0	28.9	 16
 86	 19	107.5	18.4	 16
 87	 19	1548.3	379.9	 16
 88	 19	141.3	19.2	 16
 89	 19	79.5	15.2	 16
 90	 19	486.8	65.9	 16
 91	 19	162.5	21.7	 16
 92	 19	60.8	12.2	 16
 93	 19	84.3	15.2	 16
 94	 19	108.0	20.5	 20
 95	 19	187.5	23.9	 16
 96	 19	653.0	82.0	 16
 97	 19	94.5	17.5	 16
 98	 19	124.3	17.2	 16
 99	 19	87.0	23.7	 16
100	 19	102.3	16.3	 16
101	 19	115.8	16.2	 16
102	 19	549.3	64.3	 16
103	 19	236.0	33.4	 16
104	 19	151.5	16.0	 16
105	 19	240.8	30.1	 16
106	 19	150.8	24.6	 16
107	 19	154.5	25.8	 16
108	 19	57.8	9.0	 16
109	 19	89.3	14.2	 16
110	 19	86.8	16.5	 16
111	 19	213.0	31.8	 16
112	 19	138.3	20.5	 16
113	 19	497.3	62.2	 16
114	 19	83.5	10.5	 16
115	 19	97.5	14.8	 16
116	 19	79.3	15.2	 16
117	 19	75.0	15.0	 16
118	 19	74.0	10.4	 16
119	 19	925.0	162.0	 16
120	 19	63.5	12.0	 16
121	 19	56.5	8.9	 16
122	 19	75.0	15.8	 16
123	 19	82.3	10.7	 16
124	 19	96.3	16.6	 16
125	 19	90.8	10.8	 16
126	 19	208.5	29.2	 16
127	 19	476.3	25.8	 16
128	 19	119.0	17.7	 16
129	 19	92.3	20.2	 16
130	 19	98.0	15.9	 16
131	 19	377.5	35.9	 16
132	 19	103.3	19.3	 16
133	 19	71.3	76.6	 16
134	 19	133.3	21.9	 16
135	 19	76.3	12.9	 16
136	 19	64.8	17.1	 16
137	 19	257.8	36.2	 16
138	 19	100.3	22.9	 16
139	 19	257.3	36.0	 16
140	 19	104.5	29.2	 16
141	 19	463.8	64.3	 16
142	 19	63.8	13.8	 16
143	 19	141.0	21.8	 16
144	 19	60.5	10.5	 16
145	 19	190.8	53.3	 16
146	 19	87.3	18.7	 16
147	 19	77.3	21.2	 16
148	 19	69.3	15.1	 16
149	 19	98.8	19.2	 16
150	 19	150.5	26.1	 16
151	 19	112.3	23.2	 16
152	 19	94.0	17.4	 16
153	 19	161.5	45.8	 16
154	 19	386.0	84.2	 16
155	 19	105.0	13.5	 16
156	 19	82.8	15.0	 16
157	 19	222.3	24.6	 16
158	 19	194.3	26.6	 16
159	 19	138.8	37.3	 16
160	 19	220.0	71.0	 16
161	 19	96.0	11.5	 16
162	 19	140.3	20.1	 16
163	 19	276.8	33.5	 16
164	 19	173.3	21.8	 16
165	 19	72.8	10.2	 16
166	 19	155.5	25.7	 16
167	 19	90.3	16.2	 16
168	 19	204.3	32.9	 16
169	 19	80.5	40.4	 16
170	 19	286.8	43.3	 16
171	 19	110.8	20.1	 16
172	 19	134.5	26.4	 16
173	 19	416.5	46.9	 16
174	 19	164.0	19.7	 16
175	 19	74.5	15.4	 16
176	 19	140.3	32.2	 16
177	 19	69.0	16.0	 16
178	 19	241.5	38.7	 16
179	 19	120.3	17.5	 16
180	 19	180.5	21.6	 16
181	 19	147.0	24.4	 16
182	 19	70.8	16.3	 16
183	 19	199.0	28.3	 16
184	 19	89.3	11.3	 16
185	 19	120.0	19.7	 16
186	 19	119.5	19.7	 16
187	 19	292.0	38.8	 16
188	 19	72.3	12.7	 16
189	 19	52.3	8.1	 16
190	 19	71.5	14.0	 16
191	 19	105.8	20.5	 16
192	 19	164.0	15.8	 16
193	 19	119.3	21.0	 16
194	 19	122.3	25.5	 16
195	 19	252.5	36.4	 16
196	 19	76.0	15.1	 16
197	 19	77.8	12.7	 16
198	 19	108.0	15.9	 16
199	 19	188.0	34.2	 16
200	 19	199.3	35.1	 16
201	 19	272.0	29.3	 16
202	 19	149.8	27.0	 16
203	 19	131.3	66.7	 16
204	 19	127.3	16.2	 16
205	 19	152.8	21.4	 16
206	 19	70.3	10.5	 16
207	 19	84.5	36.2	 16
208	 19	345.8	60.1	 16
209	 19	58.0	8.6	 16
210	 19	86.0	72.1	 16
211	 19	79.5	14.7	 16
212	 19	57.8	8.6	 16
213	 19	71.8	10.8	 16
214	 19	67.0	10.6	 16
215	 19	403.0	67.9	 16
216	 19	61.0	10.3	 16
217	 19	296.3	54.6	 16
218	 19	111.8	17.1	 16
219	 19	71.0	19.2	 16
220	 19	65.5	12.3	 16
221	 19	94.0	13.3	 16
222	 19	161.3	28.1	 16
223	 19	54.5	7.7	 16
224	 19	135.3	16.7	 16
225	 19	59.3	10.0	 16
226	 19	65.0	12.8	 16
227	 19	156.5	19.5	 16
228	 19	77.3	16.8	 16
229	 19	1622.8	280.8	 16
230	 19	139.0	20.7	 16
231	 19	264.8	58.2	 16
232	 19	63.0	10.8	 16
233	 19	62.5	15.2	 16
234	 19	56.0	9.6	 16
235	 19	180.3	48.2	 16
236	 19	120.0	28.9	 20
237	 19	89.5	20.9	 16
238	 19	215.5	35.4	 16
239	 19	75.3	11.2	 16
240	 19	112.0	18.3	 16
241	 19	91.8	14.0	 16
242	 19	56.5	13.5	 16
243	 19	99.5	19.4	 16
244	 19	128.5	20.1	 16
245	 19	72.8	11.1	 16
246	 19	134.5	33.1	 16
247	 19	63.0	11.3	 16
248	 19	605.0	74.8	 16
249	 19	65.8	14.6	 16
250	 19	56.3	8.3	 16
251	 19	72.5	13.4	 16
252	 19	64.0	11.0	 16
253	 19	73.8	17.6	 16
254	 19	77.3	14.2	 16
255	 19	65.8	17.7	 16
256	 19	64.8	10.3	 16
257	 19	70.3	11.8	 16
258	 19	62.0	10.4	 16
259	 19	149.3	21.8	 16
260	 19	122.5	22.5	 16
261	 19	323.5	57.3	 16
262	 19	244.8	34.7	 16
263	 19	60.0	9.6	 16
264	 19	90.5	14.4	 16
265	 19	88.5	15.2	 16
266	 19	140.3	15.3	 16
267	 19	147.3	22.9	 16
268	 19	97.5	16.1	 16
269	 19	149.8	31.8	 16
270	 19	125.3	22.7	 16
271	 19	567.0	55.6	 16
272	 19	321.3	36.4	 16
273	 19	79.3	43.0	 16
274	 19	94.0	20.2	 16
275	 19	134.0	20.5	 16
276	 19	150.0	28.8	 16
277	 19	58.3	12.3	 16
278	 19	114.3	109.7	 16
279	 19	90.3	36.3	 16
280	 19	129.5	35.8	 16
281	 19	67.0	11.8	 16
282	 19	58.0	10.2	 16
283	 19	65.0	12.5	 16
284	 19	75.5	13.0	 16
285	 19	73.8	50.3	 16
286	 19	70.3	13.1	 16
287	 19	109.3	19.0	 16
288	 19	84.3	13.9	 16
289	 19	161.8	26.6	 16
290	 19	291.5	33.9	 16
291	 19	229.0	24.2	 16
292	 19	78.3	10.4	 16
293	 19	174.0	26.4	 16
294	 19	160.3	27.2	 16
295	 19	80.5	10.1	 16
296	 19	90.5	19.9	 16
297	 19	61.3	11.1	 16
298	 19	90.3	18.3	 16
299	 19	75.8	14.5	 16
300	 19	65.0	13.0	 16
301	 19	72.0	15.2	 16
302	 19	138.3	18.9	 16
303	 19	231.3	34.7	 16
304	 19	243.3	45.2	 16
305	 19	90.8	18.9	 16
306	 19	154.0	17.4	 16
307	 19	98.0	17.7	 16
308	 19	102.8	18.3	 16
309	 19	82.3	19.2	 16
310	 19	207.3	30.3	 16
311	 19	61.8	10.0	 16
312	 19	422.8	61.3	 16
313	 19	73.3	11.3	 16
314	 19	93.3	17.2	 16
315	 19	93.0	14.2	 16
316	 19	76.5	88.5	 16
317	 19	270.0	36.7	 16
318	 19	114.0	21.4	 16
319	 19	76.3	10.1	 16
320	 19	127.8	20.2	 16
321	 19	326.8	35.2	 16
322	 19	84.3	15.2	 16
323	 19	111.3	18.3	 16
324	 19	155.0	24.1	 16
325	 19	58.0	7.6	 16
326	 19	301.5	65.7	 16
327	 19	83.5	12.0	 16
328	 19	69.3	14.9	 16
329	 19	55.5	10.9	 16
330	 19	64.3	9.6	 16
331	 19	91.5	21.1	 16
332	 19	63.3	10.2	 16
333	 19	173.0	37.0	 16
334	 19	101.0	13.8	 16
335	 19	310.0	28.5	 16
336	 19	57.8	13.1	 16
337	 19	56.3	12.4	 16
338	 19	141.8	17.3	 16
339	 19	71.3	8.7	 16
340	 19	99.0	21.6	 16
341	 19	62.3	12.8	 16
342	 19	62.5	26.4	 16
343	 19	87.5	21.6	 16
344	 19	70.5	10.4	 16
345	 19	60.0	10.5	 16
346	 19	72.8	14.9	 16
347	 19	66.3	9.9	 16
348	 19	116.8	18.0	 16
349	 19	114.8	17.6	 16
350	 19	63.3	10.5	 16
351	 19	99.5	9.8	 16
352	 19	97.8	19.2	 16
353	 19	168.3	21.6	 16
354	 19	97.3	15.7	 16
355	 19	116.5	13.3	 16
356	 19	130.3	19.4	 16
357	 19	437.0	84.4	 16
358	 19	4581.5	816.6	 16
359	 19	224.3	36.2	 16
360	 19	81.0	13.4	 16
361	 19	401.0	66.7	 16
362	 19	93.3	16.4	 16
363	 19	75.0	37.1	 16
364	 19	134.3	21.5	 16
365	 19	94.3	16.7	 16
366	 19	131.8	20.8	 16
367	 19	76.5	13.2	 16
368	 19	69.5	12.3	 16
369	 19	131.3	13.8	 16
370	 19	67.3	12.2	 16
371	 19	76.0	15.6	 16
372	 19	68.8	15.1	 16
373	 19	354.3	89.7	 16
374	 19	95.3	18.6	 16
375	 19	72.3	20.3	 16
376	 19	76.5	14.5	 16
377	 19	124.5	19.4	 16
378	 19	71.0	10.6	 16
379	 19	68.5	15.0	 20
380	 19	1307.3	167.2	 16
381	 19	153.5	26.6	 16
382	 19	61.0	16.2	 16
383	 19	94.0	13.6	 16
384	 19	454.0	68.4	 16
385	 19	110.0	17.4	 16
386	 19	88.5	12.7	 16
387	 19	258.0	27.7	 16
388	 19	113.5	22.0	 16
389	 19	70.3	9.7	 16
390	 19	73.3	14.2	 16
391	 19	70.3	18.0	 16
392	 19	79.3	51.6	 16
393	 19	125.5	24.4	 16
394	 19	72.3	10.8	 16
395	 19	179.8	29.0	 16
396	 19	113.8	18.3	 16
397	 19	135.0	57.6	 16
398	 19	79.0	20.4	 16
399	 19	142.3	67.3	 16
400	 19	731.8	123.7	 16
401	 19	68.0	15.4	 16
402	 19	117.5	26.8	 16
403	 19	106.3	15.7	 16
404	 19	56.3	11.6	 16
405	 19	70.0	17.4	 16
406	 19	65.5	7.2	 16
407	 19	93.3	14.9	 16
408	 19	637.3	104.8	 16
409	 19	1601.3	241.9	 16
410	 19	61.3	8.6	 16
411	 19	77.5	13.1	 16
412	 19	147.3	22.5	 16
413	 19	69.8	18.3	 16
414	 19	107.3	17.8	 16
415	 19	79.3	13.4	 16
416	 19	115.8	20.6	 16
417	 19	62.3	10.8	 16
418	 19	344.3	83.4	 16
419	 19	61.5	9.2	 16
420	 19	194.5	31.2	 16
421	 19	60.8	12.5	 16
422	 19	103.8	17.7	 16
423	 19	193.5	22.2	 16
424	 19	342.8	42.6	 16
425	 19	354.0	39.3	 16
426	 19	122.0	17.8	 16
427	 19	107.5	12.0	 16
428	 19	226.3	27.2	 16
429	 19	124.3	17.9	 16
430	 19	72.0	16.3	 16
431	 19	214.3	27.3	 16
432	 19	126.5	34.9	 16
433	 19	110.3	21.0	 16
434	 19	1072.3	150.0	 16
435	 19	64.3	15.8	 16
436	 19	122.0	18.0	 16
437	 19	166.5	22.3	 16
438	 19	79.8	18.9	 16
439	 19	59.0	8.4	 16
440	 19	81.5	14.0	 16
441	 19	193.3	23.8	 16
442	 19	118.3	23.5	 16
443	 19	145.5	23.1	 16
444	 19	395.0	50.9	 16
445	 19	188.3	28.0	 16
446	 19	192.5	26.7	 16
447	 19	85.3	14.1	 16
448	 19	106.0	17.0	 16
449	 19	122.3	20.4	 16
450	 19	63.5	10.0	 16
451	 19	106.0	14.2	 16
452	 19	75.3	12.1	 16
453	 19	72.8	16.0	 16
454	 19	62.0	10.4	 16
455	 19	71.3	16.8	 16
456	 19	106.0	19.4	 16
457	 19	57.5	11.8	 16
458	 19	209.8	40.7	 16
459	 19	62.0	11.4	 16
460	 19	63.8	13.8	 16
461	 19	62.3	13.3	 16
462	 19	98.3	26.4	 16
463	 19	95.3	16.8	 16
464	 19	67.5	14.4	 16
465	 19	61.3	12.3	 16
466	 19	59.0	11.4	 16
467	 19	52.0	9.6	 16
468	 19	165.8	23.9	 16
469	 19	90.3	13.2	 16
470	 19	667.0	60.1	 16
471	 19	239.8	18.8	 16
472	 19	89.0	19.0	 16
473	 19	95.3	13.4	 16
474	 19	61.3	13.1	 16
475	 19	106.5	17.1	 16
476	 19	108.3	16.8	 16
477	 19	62.5	12.7	 16
478	 19	102.8	15.5	 16
479	 19	80.8	16.4	 16
480	 19	112.3	16.6	 16
481	 19	54.5	9.1	 16
482	 19	62.3	13.7	 16
483	 19	54.3	10.4	 16
484	 19	61.8	10.8	 16
485	 19	387.0	36.6	 16
486	 19	376.3	38.8	 16
487	 19	237.0	30.9	 16
488	 19	555.3	72.0	 16
489	 19	128.3	23.6	 16
490	 19	63.8	9.0	 16
491	 19	117.3	20.5	 16
492	 19	74.5	10.6	 16
493	 19	79.5	14.8	 16
494	 19	80.0	18.4	 16
495	 19	73.3	14.7	 16
496	 19	641.0	83.4	 16
497	 19	174.0	28.2	 16
498	 19	346.3	47.7	 16
499	 19	80.0	12.0	 16
500	 19	71.5	12.9	 16
501	 19	90.8	17.2	 16
502	 19	81.8	13.0	 16
503	 19	183.3	23.7	 16
504	 19	91.3	20.7	 16
505	 19	84.3	22.7	 16
506	 19	87.0	16.6	 16
507	 19	253.0	28.4	 16
508	 19	72.8	16.5	 16
509	 19	391.3	82.4	 16
510	 19	94.8	18.3	 16
511	 19	125.5	19.0	 16
512	 19	65.5	9.4	 16
513	 19	60.0	10.4	 16
514	 19	142.8	24.2	 16
515	 19	64.3	16.9	 16
516	 19	91.5	13.4	 16
517	 19	180.8	33.7	 16
518	 19	52.0	18.3	 16
519	 19	58.3	11.1	 16
520	 19	50.5	7.8	 16
521	 19	56.3	13.6	 20
522	 19	61.5	13.8	 16
523	 19	225.3	29.1	 16
524	 19	54.3	11.3	 16
525	 19	75.3	11.0	 16
526	 19	157.0	29.9	 16
527	 19	104.0	13.8	 16
528	 19	115.0	19.7	 16
529	 19	258.3	21.6	 16
530	 19	130.8	28.1	 16
531	 19	289.3	35.3	 16
532	 19	132.3	20.2	 16
533	 19	132.5	22.4	 16
534	 19	78.3	13.2	 16
535	 19	96.3	19.2	 16
536	 19	57.8	12.8	 16
537	 19	83.0	13.9	 16
538	 19	62.0	10.2	 16
539	 19	147.3	23.1	 16
540	 19	153.8	22.7	 16
541	 19	82.5	12.9	 16
542	 19	94.5	11.4	 16
543	 19	115.0	19.3	 16
544	 19	80.5	18.8	 16
545	 19	130.8	20.6	 16
546	 19	91.3	13.8	 16
547	 19	77.3	13.4	 16
548	 19	102.0	22.4	 16
549	 19	115.0	19.2	 16
550	 19	80.8	16.3	 16
551	 19	96.3	12.5	 16
552	 19	72.8	18.0	 16
553	 19	97.5	13.6	 16
554	 19	82.0	13.1	 16
555	 19	58.0	13.3	 16
556	 19	109.3	21.6	 16
557	 19	277.3	51.6	 16
558	 19	63.0	10.3	 16
559	 19	618.5	90.8	 16
560	 19	181.5	24.5	 16
561	 19	66.0	11.4	 16
562	 19	116.8	24.4	 16
563	 19	177.0	29.7	 16
564	 19	65.5	8.6	 16
565	 19	51.8	10.5	 16
566	 19	247.0	44.7	 16
567	 19	85.3	18.6	 16
568	 19	478.0	62.5	 16
569	 19	75.5	9.7	 16
570	 19	58.5	17.2	 16
571	 19	82.5	18.4	 16
572	 19	104.0	21.3	 16
573	 19	72.5	13.7	 16
574	 19	116.0	17.4	 16
575	 19	94.3	14.3	 16
576	 19	79.0	12.3	 16
577	 19	74.5	8.7	 16
578	 19	98.0	17.5	 16
579	 19	276.3	31.8	 16
580	 19	405.3	35.8	 16
581	 19	335.5	19.3	 16
582	 19	94.3	16.0	 16
583	 19	153.3	26.1	 16
584	 19	99.3	17.6	 16
585	 19	80.5	11.4	 16
586	 19	476.3	91.0	 16
587	 19	944.5	217.4	 16
588	 19	101.0	13.3	 16
589	 19	56.3	11.6	 16
590	 19	147.3	23.4	 16
591	 19	103.5	12.5	 16
592	 19	115.0	16.9	 16
593	 19	154.3	23.0	 16
594	 19	82.8	20.4	 16
595	 19	69.3	11.4	 16
596	 19	108.0	11.4	 16
597	 19	684.8	142.5	 16
598	 19	73.3	13.7	 16
599	 19	179.0	35.0	 16
600	 19	88.8	15.4	 16
601	 19	84.8	11.9	 16
602	 19	316.8	98.2	 16
603	 19	116.8	18.7	 16
604	 19	81.8	11.8	 16
605	 19	116.0	14.7	 16
606	 19	143.5	68.7	 16
607	 19	244.3	32.8	 16
608	 19	382.0	53.0	 16
609	 19	115.3	16.4	 16
610	 19	71.0	11.1	 16
611	 19	63.3	10.5	 16
612	 19	72.3	13.5	 16
613	 19	87.8	39.8	 16
614	 19	195.5	42.0	 16
615	 19	338.8	41.2	 16
616	 19	392.5	41.5	 16
617	 19	848.5	95.7	 16
618	 19	127.0	30.5	 16
619	 19	98.5	37.0	 16
620	 19	69.3	13.7	 16
621	 19	71.8	14.3	 16
622	 19	184.8	27.3	 16
623	 19	110.3	18.9	 16
624	 19	190.5	23.6	 16
625	 19	127.8	20.0	 16
626	 19	111.3	19.3	 16
627	 19	59.5	10.3	 16
628	 19	67.3	7.9	 16
629	 19	149.0	18.1	 16
630	 19	82.0	18.4	 16
631	 19	92.0	16.0	 16
632	 19	103.8	15.6	 16
633	 19	269.8	36.6	 16
634	 19	326.5	40.2	 16
635	 19	346.5	42.8	 16
636	 19	162.0	33.1	 16
637	 19	96.5	21.4	 16
638	 19	66.0	7.2	 16
639	 19	129.3	23.4	 16
640	 19	201.3	27.4	 16
641	 19	600.0	52.9	 16
642	 19	311.0	26.0	 16
643	 19	301.0	40.1	 16
644	 19	239.8	27.0	 16
645	 19	150.3	31.5	 16
646	 19	118.3	19.1	 16
647	 19	288.3	27.7	 16
648	 19	442.0	87.6	 16
649	 19	162.3	25.0	 16
650	 19	191.3	31.5	 16
651	 19	232.3	28.6	 16
652	 19	154.0	44.6	 16
653	 19	161.5	153.8	 16
654	 19	399.3	69.9	 16
655	 19	135.5	21.0	 16
656	 19	87.3	12.4	 16
657	 19	114.0	19.5	 16
658	 19	76.0	14.9	 16
659	 19	84.8	24.5	 16
660	 19	133.8	26.2	 16
661	 19	107.3	26.3	 16
662	 19	157.8	22.1	 16
663	 19	52.0	11.4	 16
664	 19	69.0	14.8	 20
665	 19	68.3	13.2	 16
666	 19	279.8	18.6	 16
667	 19	86.3	13.4	 16
668	 19	55.5	8.7	 16
669	 19	166.3	26.5	 16
670	 19	99.3	15.8	 16
671	 19	161.0	25.7	 16
672	 19	78.5	16.9	 16
673	 19	69.0	12.1	 16
674	 19	87.8	13.0	 16
675	 19	81.3	11.3	 16
676	 19	369.3	30.7	 16
677	 19	138.3	16.5	 16
678	 19	66.0	11.8	 16
679	 19	55.8	9.9	 16
680	 19	58.3	10.3	 16
681	 19	70.8	9.0	 16
682	 19	67.3	9.1	 16
683	 19	862.3	138.9	 16
684	 19	138.0	10.4	 16
685	 19	127.3	22.3	 16
686	 19	72.3	14.0	 16
687	 19	84.5	15.6	 16
688	 19	122.5	19.4	 16
689	 19	178.3	46.4	 16
690	 19	138.8	30.9	 16
691	 19	79.8	16.9	 16
692	 19	310.5	25.1	 16
693	 19	291.0	37.1	 16
694	 19	182.5	27.7	 16
695	 19	167.0	25.0	 16
696	 19	846.5	119.0	 16
697	 19	72.3	14.6	 16
698	 19	81.5	13.7	 16
699	 19	98.0	13.3	 16
700	 19	86.0	16.7	 16
701	 19	68.3	11.2	 16
702	 19	89.5	11.7	 16
703	 19	84.3	15.1	 16
704	 19	761.5	89.6	 16
705	 19	74.0	14.4	 16
706	 19	72.3	9.8	 16
707	 19	233.5	30.9	 16
708	 19	142.3	21.1	 16
709	 19	218.8	19.3	 16
710	 19	186.5	30.5	 16
711	 19	102.5	13.1	 16
  0	 20	7714.3	790.3	 16
  1	 20	104.0	18.0	 16
  2	 20	93.5	16.0	 16
  3	 20	156.0	28.6	 16
  4	 20	353.3	40.7	 16
  5	 20	74.3	17.0	 16
  6	 20	78.3	12.5	 16
  7	 20	70.3	11.0	 16
  8	 20	76.5	15.5	 16
  9	 20	66.5	10.8	 16
 10	 20	78.0	13.5	 16
 11	 20	62.3	12.8	 16
 12	 20	87.0	16.3	 16
 13	 20	116.0	19.9	 16
 14	 20	163.5	18.0	 16
 15	 20	189.5	21.5	 16
 16	 20	167.3	25.3	 16
 17	 20	199.8	31.9	 16
 18	 20	318.0	28.6	 16
 19	 20	184.0	27.0	 16
 20	 20	124.5	19.3	 16
 21	 20	152.3	25.9	 16
 22	 20	88.5	12.5	 16
 23	 20	91.0	18.1	 16
 24	 20	135.0	22.4	 16
 25	 20	128.5	23.9	 16
 26	 20	56.3	9.2	 16
 27	 20	109.5	39.1	 16
 28	 20	62.0	9.5	 16
 29	 20	63.0	13.1	 16
 30	 20	70.8	14.9	 16
 31	 20	137.5	23.3	 16
 32	 20	64.0	8.1	 16
 33	 20	83.5	12.7	 16
 34	 20	104.3	16.9	 16
 35	 20	392.3	54.9	 16
 36	 20	88.0	19.7	 16
 37	 20	84.5	19.4	 16
 38	 20	221.3	25.0	 16
 39	 20	183.0	27.5	 16
 40	 20	172.5	25.5	 16
 41	 20	70.5	11.2	 16
 42	 20	61.8	9.7	 16
 43	 20	68.5	9.6	 16
 44	 20	142.8	19.8	 16
 45	 20	75.3	7.8	 16
 46	 20	86.0	34.5	 16
 47	 20	88.8	16.3	 16
 48	 20	235.5	26.1	 16
 49	 20	163.0	18.7	 16
 50	 20	71.3	12.7	 16
 51	 20	132.3	24.0	 16
 52	 20	92.3	14.0	 16
 53	 20	293.5	33.7	 16
 54	 20	100.5	14.5	 16
 55	 20	234.8	37.7	 16
 56	 20	186.3	27.9	 16
 57	 20	132.3	19.7	 16
 58	 20	213.0	29.4	 16
 59	 20	194.8	19.8	 16
 60	 20	464.5	63.0	 16
 61	 20	68.3	13.7	 16
 62	 20	241.3	25.2	 16
 63	 20	332.3	35.8	 16
 64	 20	161.8	24.9	 16
 65	 20	117.0	18.8	 16
 66	 20	79.3	20.7	 16
 67	 20	73.3	12.8	 16
 68	 20	109.8	22.1	 16
 69	 20	145.0	19.6	 16
 70	 20	234.8	18.9	 16
 71	 20	178.3	23.5	 16
 72	 20	141.0	23.6	 16
 73	 20	260.8	26.2	 16
 74	 20	141.8	23.9	 16
 75	 20	94.5	14.4	 16
 76	 20	95.5	18.1	 16
 77	 20	176.3	21.3	 16
 78	 20	144.0	19.7	 16
 79	 20	62.0	12.6	 16
 80	 20	83.3	12.3	 16
 81	 20	68.5	12.0	 16
 82	 20	68.5	12.2	 16
 83	 20	220.3	35.0	 16
 84	 20	146.0	37.4	 16
 85	 20	112.3	16.5	 16
 86	 20	71.5	15.0	 16
 87	 20	286.5	64.7	 16
 88	 20	118.0	17.5	 16
 89	 20	101.5	19.9	 16
 90	 20	168.3	23.7	 16
 91	 20	148.5	27.5	 16
 92	 20	67.5	12.9	 16
 93	 20	75.3	12.3	 16
 94	 20	78.3	15.8	 16
 95	 20	71.5	10.4	 20
 96	 20	289.3	42.5	 16
 97	 20	87.5	19.6	 16
 98	 20	162.8	18.8	 16
 99	 20	109.0	22.7	 16
100	 20	105.8	16.2	 16
101	 20	96.0	16.4	 16
102	 20	701.5	68.9	 16
103	 20	394.8	31.4	 16
104	 20	243.5	26.3	 16
105	 20	114.3	20.2	 16
106	 20	72.3	11.5	 16
107	 20	84.3	14.5	 16
108	 20	59.3	8.3	 16
109	 20	82.5	14.2	 16
110	 20	71.3	10.9	 16
111	 20	89.3	18.1	 16
112	 20	125.8	64.3	 16
113	 20	116.5	22.3	 16
114	 20	77.0	13.7	 16
115	 20	73.0	15.7	 16
116	 20	67.0	11.3	 16
117	 20	65.5	13.7	 16
118	 20	65.0	12.1	 16
119	 20	107.0	19.9	 16
120	 20	56.5	9.8	 16
121	 20	59.5	9.0	 16
122	 20	62.8	10.7	 16
123	 20	89.3	15.5	 16
124	 20	65.0	13.3	 16
125	 20	80.3	9.8	 16
126	 20	514.0	61.2	 16
127	 20	634.8	65.7	 16
128	 20	202.0	27.3	 16
129	 20	89.3	20.6	 16
130	 20	115.0	59.6	 16
131	 20	278.8	47.4	 16
132	 20	90.0	20.7	 16
133	 20	77.5	25.6	 16
134	 20	76.5	14.5	 16
135	 20	61.8	13.5	 16
136	 20	61.3	9.3	 16
137	 20	151.8	96.1	 16
138	 20	142.5	18.9	 16
139	 20	121.5	19.3	 16
140	 20	187.3	31.9	 16
141	 20	139.0	24.4	 16
142	 20	67.3	21.6	 16
143	 20	76.3	11.5	 16
144	 20	53.3	8.9	 16
145	 20	70.3	17.2	 16
146	 20	69.3	14.7	 16
147	 20	64.3	11.9	 16
148	 20	60.3	6.4	 16
149	 20	107.8	37.5	 16
150	 20	139.5	23.4	 16
151	 20	98.5	17.6	 16
152	 20	78.0	16.2	 16
153	 20	82.5	18.6	 16
154	 20	107.8	20.6	 16
155	 20	106.0	13.6	 16
156	 20	115.5	31.7	 16
157	 20	140.5	38.4	 16
158	 20	73.8	9.0	 16
159	 20	123.3	36.0	 16
160	 20	131.5	24.0	 16
161	 20	82.8	27.5	 16
162	 20	182.5	29.7	 16
163	 20	600.8	85.1	 16
164	 20	152.5	23.0	 16
165	 20	75.5	15.1	 16
166	 20	157.3	23.7	 16
167	 20	62.3	11.8	 16
168	 20	198.8	23.1	 16
169	 20	67.5	14.9	 16
170	 20	104.3	16.3	 16
171	 20	323.5	24.1	 16
172	 20	114.0	23.7	 16
173	 20	265.5	34.5	 16
174	 20	115.8	16.8	 16
175	 20	75.5	13.4	 16
176	 20	95.0	20.9	 16
177	 20	70.3	12.9	 16
178	 20	189.3	28.9	 16
179	 20	182.0	71.1	 16
180	 20	124.0	21.3	 16
181	 20	78.3	14.8	 16
182	 20	69.3	13.7	 16
183	 20	114.3	18.0	 16
184	 20	81.3	13.2	 16
185	 20	71.5	12.2	 16
186	 20	68.0	23.1	 16
187	 20	160.3	25.6	 16
188	 20	65.0	11.6	 16
189	 20	49.0	7.0	 16
190	 20	60.3	15.4	 16
191	 20	62.0	7.4	 16
192	 20	93.0	23.8	 16
193	 20	72.0	9.9	 16
194	 20	108.0	12.6	 16
195	 20	113.3	15.6	 16
196	 20	62.3	12.0	 16
197	 20	91.5	20.5	 16
198	 20	117.3	18.3	 16
199	 20	133.3	18.6	 16
200	 20	106.0	18.9	 16
201	 20	275.3	45.1	 16
202	 20	184.0	45.2	 16
203	 20	79.0	16.7	 16
204	 20	80.3	16.4	 16
205	 20	113.0	20.3	 16
206	 20	65.8	14.0	 16
207	 20	69.0	15.5	 16
208	 20	134.5	18.4	 16
209	 20	73.0	12.6	 16
210	 20	58.8	12.2	 16
211	 20	77.3	18.0	 16
212	 20	56.0	13.7	 16
213	 20	67.0	11.1	 16
214	 20	69.5	12.1	 16
215	 20	68.5	15.0	 16
216	 20	65.8	11.1	 16
217	 20	60.3	10.1	 16
218	 20	52.3	6.3	 16
219	 20	76.0	15.1	 16
220	 20	60.0	11.1	 16
221	 20	122.5	17.5	 16
222	 20	73.3	14.7	 16
223	 20	58.8	49.3	 16
224	 20	73.8	12.4	 16
225	 20	66.0	85.4	 16
226	 20	52.3	8.5	 16
227	 20	192.3	25.9	 16
228	 20	78.5	14.1	 16
229	 20	196.5	38.2	 16
230	 20	77.0	42.1	 16
231	 20	65.5	11.8	 16
232	 20	58.5	9.9	 16
233	 20	68.3	20.5	 16
234	 20	55.5	8.4	 16
235	 20	157.0	21.2	 16
236	 20	62.0	12.3	 16
237	 20	73.5	13.1	 16
238	 20	449.5	57.5	 20
239	 20	90.8	14.5	 16
240	 20	93.5	21.6	 16
241	 20	80.0	17.1	 16
242	 20	54.5	10.4	 16
243	 20	70.5	12.0	 16
244	 20	145.5	26.8	 16
245	 20	73.8	28.7	 16
246	 20	98.5	20.0	 16
247	 20	53.5	8.7	 16
248	 20	183.8	37.6	 16
249	 20	73.5	13.2	 16
250	 20	59.3	9.3	 16
251	 20	68.0	13.7	 16
252	 20	61.8	13.4	 16
253	 20	71.0	11.6	 16
254	 20	90.5	16.9	 16
255	 20	65.5	9.8	 16
256	 20	61.5	14.0	 16
257	 20	60.3	11.1	 16
258	 20	59.3	9.2	 16
259	 20	104.0	18.3	 16
260	 20	106.3	15.4	 16
261	 20	253.0	30.8	 16
262	 20	166.0	20.0	 16
263	 20	71.5	15.2	 16
264	 20	81.5	16.6	 16
265	 20	119.8	110.1	 16
266	 20	121.5	20.6	 16
267	 20	115.0	17.6	 16
268	 20	105.3	15.1	 16
269	 20	72.3	12.2	 16
270	 20	108.0	16.6	 16
271	 20	191.8	31.0	 16
272	 20	217.5	25.6	 16
273	 20	63.3	8.0	 16
274	 20	83.5	12.0	 16
275	 20	135.0	23.2	 16
276	 20	164.0	24.9	 16
277	 20	59.0	19.7	 16
278	 20	63.5	14.8	 16
279	 20	90.8	20.0	 16
280	 20	93.8	14.6	 16
281	 20	73.3	35.3	 16
282	 20	58.5	9.2	 16
283	 20	72.3	15.3	 16
284	 20	58.3	9.3	 16
285	 20	54.0	5.7	 16
286	 20	63.3	10.0	 16
287	 20	82.0	15.9	 16
288	 20	88.0	14.1	 16
289	 20	79.0	11.0	 16
290	 20	150.0	34.9	 16
291	 20	103.8	13.3	 16
292	 20	73.8	17.4	 16
293	 20	87.3	15.3	 16
294	 20	94.5	14.6	 16
295	 20	59.5	10.9	 16
296	 20	62.5	11.5	 16
297	 20	63.3	9.4	 16
298	 20	81.8	11.7	 16
299	 20	80.0	17.1	 16
300	 20	70.5	17.9	 16
301	 20	76.5	17.0	 16
302	 20	82.3	18.9	 16
303	 20	210.5	20.7	 16
304	 20	150.5	22.4	 16
305	 20	114.0	16.1	 16
306	 20	110.0	20.5	 16
307	 20	66.0	9.9	 16
308	 20	75.3	15.9	 16
309	 20	79.0	12.4	 16
310	 20	81.3	14.4	 16
311	 20	52.3	10.6	 16
312	 20	99.0	15.8	 16
313	 20	60.8	10.0	 16
314	 20	73.0	11.8	 16
315	 20	69.0	12.9	 16
316	 20	63.0	15.2	 16
317	 20	86.0	16.5	 16
318	 20	97.5	16.7	 16
319	 20	91.5	31.7	 16
320	 20	106.3	29.5	 16
321	 20	401.5	39.0	 16
322	 20	155.0	22.2	 16
323	 20	164.8	24.7	 16
324	 20	171.5	19.6	 16
325	 20	60.0	12.4	 16
326	 20	104.3	13.0	 16
327	 20	95.8	19.4	 16
328	 20	52.8	10.6	 16
329	 20	56.8	8.2	 16
330	 20	58.5	12.9	 16
331	 20	77.5	11.3	 16
332	 20	59.3	10.1	 16
333	 20	80.5	12.6	 16
334	 20	103.5	14.7	 16
335	 20	462.8	58.0	 16
336	 20	51.5	8.7	 16
337	 20	52.3	7.8	 16
338	 20	114.5	20.5	 16
339	 20	81.5	11.3	 16
340	 20	100.5	19.0	 16
341	 20	54.8	10.4	 16
342	 20	52.8	10.4	 16
343	 20	64.3	9.4	 16
344	 20	70.5	19.6	 16
345	 20	58.8	8.7	 16
346	 20	64.0	15.0	 16
347	 20	59.5	10.8	 16
348	 20	172.5	21.5	 16
349	 20	66.8	11.9	 16
350	 20	56.3	12.0	 16
351	 20	67.0	14.8	 16
352	 20	73.0	12.0	 16
353	 20	96.8	18.6	 16
354	 20	71.0	11.7	 16
355	 20	89.5	16.3	 16
356	 20	115.3	18.2	 16
357	 20	183.5	27.3	 16
358	 20	538.5	84.5	 16
359	 20	321.5	37.8	 16
360	 20	75.5	16.5	 16
361	 20	91.0	34.9	 16
362	 20	66.5	8.4	 16
363	 20	60.8	9.5	 16
364	 20	112.3	25.5	 16
365	 20	159.5	27.3	 16
366	 20	710.8	74.8	 16
367	 20	130.5	30.8	 16
368	 20	63.0	20.0	 16
369	 20	149.0	26.6	 16
370	 20	76.3	22.8	 16
371	 20	94.5	20.8	 16
372	 20	66.0	7.8	 16
373	 20	78.3	20.3	 16
374	 20	65.8	14.4	 16
375	 20	116.8	86.3	 16
376	 20	86.3	16.6	 16
377	 20	95.5	19.6	 16
378	 20	53.5	10.3	 16
379	 20	65.3	11.7	 16
380	 20	125.3	33.8	 20
381	 20	67.0	11.2	 16
382	 20	54.8	12.7	 16
383	 20	146.8	20.5	 16
384	 20	81.8	18.4	 16
385	 20	96.0	16.9	 16
386	 20	67.3	14.7	 16
387	 20	121.5	17.2	 16
388	 20	78.3	13.4	 16
389	 20	65.8	10.8	 16
390	 20	56.5	11.8	 16
391	 20	62.5	12.3	 16
392	 20	79.0	13.0	 16
393	 20	62.3	11.4	 16
394	 20	63.0	6.0	 16
395	 20	278.8	33.9	 16
396	 20	85.5	20.5	 16
397	 20	103.5	91.0	 16
398	 20	71.3	12.6	 16
399	 20	141.0	20.2	 16
400	 20	131.0	23.2	 16
401	 20	65.5	9.9	 16
402	 20	61.3	7.0	 16
403	 20	75.5	16.3	 16
404	 20	52.0	7.2	 16
405	 20	52.3	8.3	 16
406	 20	50.3	10.6	 16
407	 20	78.5	14.6	 16
408	 20	222.5	20.6	 16
409	 20	486.5	73.9	 16
410	 20	80.3	16.7	 16
411	 20	86.8	22.1	 16
412	 20	237.5	29.1	 16
413	 20	79.3	15.6	 16
414	 20	151.5	22.2	 16
415	 20	86.0	13.3	 16
416	 20	130.3	23.4	 16
417	 20	72.8	12.1	 16
418	 20	76.0	13.9	 16
419	 20	56.8	10.3	 16
420	 20	175.0	23.9	 16
421	 20	74.8	18.6	 16
422	 20	60.0	8.7	 16
423	 20	137.3	13.4	 12
424	 20	263.5	40.9	 16
425	 20	110.5	17.1	 16
426	 20	93.5	18.9	 16
427	 20	107.0	16.6	 16
428	 20	189.0	29.6	 16
429	 20	141.8	21.9	 16
430	 20	74.5	8.8	 16
431	 20	201.5	27.5	 16
432	 20	116.8	25.1	 16
433	 20	104.0	17.8	 16
434	 20	193.5	26.1	 16
435	 20	57.8	14.0	 16
436	 20	108.3	19.8	 16
437	 20	75.3	12.9	 16
438	 20	61.8	10.1	 16
439	 20	58.0	9.3	 16
440	 20	74.3	22.1	 16
441	 20	107.0	15.0	 16
442	 20	158.0	45.1	 16
443	 20	74.3	9.5	 16
444	 20	229.3	32.4	 16
445	 20	201.3	22.3	 16
446	 20	176.5	43.2	 16
447	 20	86.5	11.0	 16
448	 20	86.8	14.4	 16
449	 20	102.3	13.2	 16
450	 20	79.5	18.4	 16
451	 20	84.3	15.2	 16
452	 20	87.3	12.8	 16
453	 20	62.3	8.3	 16
454	 20	69.0	15.8	 16
455	 20	83.0	16.7	 16
456	 20	91.0	14.8	 16
457	 20	69.0	9.9	 16
458	 20	76.8	11.4	 16
459	 20	66.3	18.3	 16
460	 20	53.0	10.2	 16
461	 20	61.5	9.9	 16
462	 20	72.8	12.4	 16
463	 20	100.0	16.7	 16
464	 20	63.3	9.3	 16
465	 20	59.0	9.9	 16
466	 20	52.5	8.1	 16
467	 20	50.0	9.9	 16
468	 20	99.0	15.6	 16
469	 20	78.0	11.8	 16
470	 20	182.5	37.9	 16
471	 20	244.3	37.6	 16
472	 20	70.3	11.7	 16
473	 20	81.3	14.4	 16
474	 20	51.8	9.0	 16
475	 20	80.3	14.9	 16
476	 20	77.3	18.6	 16
477	 20	59.5	12.2	 16
478	 20	77.5	12.9	 16
479	 20	98.8	66.3	 16
480	 20	177.0	24.0	 16
481	 20	65.3	12.7	 16
482	 20	86.0	19.7	 16
483	 20	54.5	10.6	 16
484	 20	69.5	15.6	 16
485	 20	368.5	35.7	 16
486	 20	325.3	31.5	 16
487	 20	385.0	49.7	 16
488	 20	507.0	34.4	 16
489	 20	150.3	19.4	 16
490	 20	64.5	9.8	 16
491	 20	122.3	16.6	 16
492	 20	85.0	17.0	 16
493	 20	107.0	15.7	 16
494	 20	109.0	19.2	 16
495	 20	73.3	15.8	 16
496	 20	101.3	22.1	 16
497	 20	68.3	10.7	 16
498	 20	103.8	14.6	 16
499	 20	87.0	15.3	 16
500	 20	70.5	15.0	 16
501	 20	82.5	14.7	 16
502	 20	84.5	15.5	 16
503	 20	94.0	17.1	 16
504	 20	110.0	20.3	 16
505	 20	72.8	14.2	 16
506	 20	71.3	26.3	 16
507	 20	172.3	48.3	 16
508	 20	81.0	14.6	 16
509	 20	155.3	25.4	 16
510	 20	78.3	10.4	 16
511	 20	145.0	24.4	 16
512	 20	54.3	11.4	 16
513	 20	60.0	9.6	 16
514	 20	59.0	11.1	 16
515	 20	53.0	11.4	 16
516	 20	80.3	13.7	 16
517	 20	74.8	11.1	 16
518	 20	48.0	7.5	 16
519	 20	57.3	9.0	 16
520	 20	49.0	13.5	 16
521	 20	56.5	9.9	 16
522	 20	57.3	12.0	 16
523	 20	98.3	14.7	 20
524	 20	59.3	12.8	 16
525	 20	60.8	13.7	 16
526	 20	83.5	13.6	 16
527	 20	83.5	11.6	 16
528	 20	151.0	20.6	 16
529	 20	403.3	42.4	 16
530	 20	169.5	136.9	 16
531	 20	179.3	85.2	 16
532	 20	106.8	18.2	 16
533	 20	76.3	14.9	 16
534	 20	62.3	12.3	 16
535	 20	67.3	10.7	 16
536	 20	62.0	9.7	 16
537	 20	81.0	13.4	 16
538	 20	78.5	14.9	 16
539	 20	84.0	9.4	 16
540	 20	82.3	16.4	 16
541	 20	82.3	9.7	 16
542	 20	84.0	13.8	 16
543	 20	73.0	13.7	 16
544	 20	86.5	17.4	 16
545	 20	73.3	16.4	 16
546	 20	83.3	10.9	 16
547	 20	76.5	13.1	 16
548	 20	72.8	12.2	 16
549	 20	80.3	11.3	 16
550	 20	73.5	9.9	 16
551	 20	96.3	17.4	 16
552	 20	67.3	12.3	 16
553	 20	102.8	24.2	 16
554	 20	66.3	11.0	 16
555	 20	59.5	10.9	 16
556	 20	83.5	31.7	 16
557	 20	85.3	16.0	 16
558	 20	55.0	11.3	 16
559	 20	142.5	18.9	 16
560	 20	121.0	18.2	 16
561	 20	73.8	16.0	 16
562	 20	81.8	14.8	 16
563	 20	85.5	29.1	 16
564	 20	92.8	15.3	 16
565	 20	54.8	8.4	 16
566	 20	87.5	10.9	 16
567	 20	58.3	8.8	 16
568	 20	330.8	53.7	 16
569	 20	73.5	15.1	 16
570	 20	58.3	8.7	 16
571	 20	109.0	17.2	 16
572	 20	94.5	12.8	 16
573	 20	65.0	12.9	 16
574	 20	84.3	15.4	 16
575	 20	77.5	12.5	 16
576	 20	141.5	21.0	 16
577	 20	65.3	10.1	 16
578	 20	86.3	12.6	 16
579	 20	173.3	26.8	 16
580	 20	450.3	49.1	 16
581	 20	415.5	62.6	 16
582	 20	95.3	17.7	 16
583	 20	92.5	18.8	 16
584	 20	92.5	18.0	 16
585	 20	84.0	14.9	 16
586	 20	249.0	31.0	 16
587	 20	139.0	15.9	 16
588	 20	60.3	9.3	 16
589	 20	69.5	8.6	 16
590	 20	215.5	32.2	 16
591	 20	120.3	50.7	 16
592	 20	127.3	10.3	 16
593	 20	95.3	19.7	 16
594	 20	73.5	14.7	 16
595	 20	103.0	22.3	 16
596	 20	88.8	24.0	 16
597	 20	153.8	24.7	 16
598	 20	56.0	8.8	 16
599	 20	165.8	20.3	 16
600	 20	135.8	22.2	 16
601	 20	136.5	16.9	 16
602	 20	362.8	47.1	 16
603	 20	150.3	18.2	 16
604	 20	114.8	57.7	 16
605	 20	82.8	12.1	 16
606	 20	140.3	30.8	 16
607	 20	190.3	22.5	 16
608	 20	448.0	53.6	 16
609	 20	117.3	21.9	 16
610	 20	74.5	13.9	 16
611	 20	61.5	7.9	 16
612	 20	58.0	11.9	 16
613	 20	66.3	9.1	 16
614	 20	70.3	8.0	 16
615	 20	155.0	22.1	 16
616	 20	264.0	36.8	 16
617	 20	145.3	30.8	 16
618	 20	118.5	20.0	 16
619	 20	85.3	17.5	 16
620	 20	71.3	10.8	 16
621	 20	72.5	15.4	 16
622	 20	76.3	13.9	 16
623	 20	86.8	10.9	 16
624	 20	91.8	15.9	 16
625	 20	105.3	28.2	 16
626	 20	71.0	11.8	 16
627	 20	64.0	29.9	 16
628	 20	62.5	11.4	 16
629	 20	152.3	30.3	 16
630	 20	73.0	9.1	 16
631	 20	135.5	21.3	 16
632	 20	148.3	30.2	 16
633	 20	118.5	13.7	 16
634	 20	108.3	20.4	 16
635	 20	117.3	18.3	 16
636	 20	223.3	28.0	 16
637	 20	80.0	13.3	 16
638	 20	81.0	13.5	 16
639	 20	112.5	13.4	 16
640	 20	140.5	22.4	 16
641	 20	1016.5	105.8	 16
642	 20	434.3	38.6	 16
643	 20	336.5	30.0	 16
644	 20	518.5	49.9	 16
645	 20	175.5	26.5	 16
646	 20	145.0	19.5	 16
647	 20	206.5	36.7	 16
648	 20	458.3	64.3	 16
649	 20	197.0	38.4	 16
650	 20	180.8	31.1	 16
651	 20	363.3	55.5	 16
652	 20	202.3	28.0	 16
653	 20	104.5	12.2	 16
654	 20	115.3	15.1	 16
655	 20	93.3	12.2	 16
656	 20	83.0	16.4	 16
657	 20	116.3	28.0	 16
658	 20	87.3	10.9	 16
659	 20	85.0	19.6	 16
660	 20	80.8	16.9	 16
661	 20	90.0	12.0	 16
662	 20	78.8	13.5	 16
663	 20	64.3	21.1	 16
664	 20	56.5	9.0	 16
665	 20	84.3	36.6	 20
666	 20	158.3	17.9	 16
667	 20	103.0	32.1	 16
668	 20	54.3	8.5	 16
669	 20	90.0	13.5	 16
670	 20	180.0	111.1	 16
671	 20	334.3	29.1	 16
672	 20	75.0	11.9	 16
673	 20	49.5	9.4	 16
674	 20	56.3	10.6	 16
675	 20	131.3	93.4	 16
676	 20	128.5	24.0	 16
677	 20	100.0	16.1	 16
678	 20	63.3	14.3	 16
679	 20	54.0	8.6	 16
680	 20	48.5	12.9	 16
681	 20	67.3	13.6	 16
682	 20	72.8	12.3	 16
683	 20	101.5	28.7	 16
684	 20	82.5	17.2	 16
685	 20	77.3	11.8	 16
686	 20	81.0	13.5	 16
687	 20	63.0	11.2	 16
688	 20	71.3	14.5	 16
689	 20	167.5	22.5	 16
690	 20	98.8	15.2	 16
691	 20	100.0	115.3	 16
692	 20	390.3	35.7	 16
693	 20	448.0	50.0	 16
694	 20	169.0	25.0	 16
695	 20	148.5	39.0	 16
696	 20	137.0	27.1	 16
697	 20	62.3	8.4	 16
698	 20	61.3	11.8	 16
699	 20	71.8	13.9	 16
700	 20	114.3	24.2	 16
701	 20	70.5	11.3	 16
702	 20	93.5	13.1	 16
703	 20	107.0	24.2	 16
704	 20	391.5	47.4	 16
705	 20	69.0	14.0	 16
706	 20	73.5	18.7	 16
707	 20	152.5	22.4	 16
708	 20	82.5	11.7	 16
709	 20	138.0	16.1	 16
710	 20	123.5	15.8	 16
711	 20	7976.8	997.2	 16
  0	 21	119.3	38.7	 16
  1	 21	216.3	27.0	 16
  2	 21	286.5	45.8	 16
  3	 21	104.0	14.7	 16
  4	 21	111.3	17.9	 16
  5	 21	86.0	15.8	 16
  6	 21	68.8	12.4	 16
  7	 21	204.3	25.9	 16
  8	 21	188.3	32.0	 16
  9	 21	98.3	17.8	 16
 10	 21	218.3	31.0	 16
 11	 21	109.5	20.2	 16
 12	 21	254.5	23.9	 16
 13	 21	79.5	10.8	 16
 14	 21	191.3	16.2	 16
 15	 21	1328.0	139.6	 16
 16	 21	110.0	16.2	 16
 17	 21	82.0	11.4	 16
 18	 21	105.3	15.7	 16
 19	 21	123.3	16.9	 16
 20	 21	144.5	19.3	 16
 21	 21	130.8	19.4	 16
 22	 21	220.3	37.3	 16
 23	 21	72.5	10.0	 16
 24	 21	104.8	14.3	 16
 25	 21	168.8	27.6	 16
 26	 21	67.3	16.8	 16
 27	 21	98.5	22.9	 16
 28	 21	68.0	15.3	 16
 29	 21	80.8	15.9	 16
 30	 21	277.3	39.7	 16
 31	 21	214.8	27.6	 16
 32	 21	66.0	13.0	 16
 33	 21	461.8	63.2	 16
 34	 21	277.0	25.0	 16
 35	 21	63.8	11.6	 16
 36	 21	100.5	124.3	 16
 37	 21	65.8	14.7	 16
 38	 21	178.5	33.2	 16
 39	 21	157.8	25.1	 16
 40	 21	248.5	21.5	 16
 41	 21	179.0	21.3	 16
 42	 21	79.0	12.7	 16
 43	 21	66.5	10.5	 16
 44	 21	74.3	17.1	 16
 45	 21	70.5	10.0	 16
 46	 21	88.0	11.7	 16
 47	 21	94.5	13.8	 16
 48	 21	148.5	17.0	 16
 49	 21	129.5	22.4	 16
 50	 21	73.5	55.1	 16
 51	 21	181.3	21.4	 16
 52	 21	222.0	42.3	 16
 53	 21	63.8	8.0	 16
 54	 21	84.0	13.8	 16
 55	 21	139.8	27.9	 16
 56	 21	278.8	36.6	 16
 57	 21	340.8	99.6	 16
 58	 21	607.3	70.2	 16
 59	 21	206.5	28.0	 16
 60	 21	81.3	15.2	 16
 61	 21	86.5	15.9	 16
 62	 21	100.8	12.8	 16
 63	 21	231.3	34.0	 16
 64	 21	118.5	67.6	 16
 65	 21	84.5	13.4	 16
 66	 21	96.0	18.0	 16
 67	 21	58.3	8.3	 16
 68	 21	139.8	18.4	 16
 69	 21	246.5	36.5	 16
 70	 21	405.8	30.9	 16
 71	 21	74.8	24.6	 16
 72	 21	115.3	38.5	 16
 73	 21	2275.5	231.4	 16
 74	 21	502.0	49.6	 16
 75	 21	172.5	25.5	 16
 76	 21	87.5	12.7	 16
 77	 21	81.8	26.2	 16
 78	 21	125.0	23.4	 16
 79	 21	64.0	16.3	 16
 80	 21	83.5	18.6	 16
 81	 21	96.0	15.8	 16
 82	 21	123.8	21.3	 16
 83	 21	322.3	43.6	 16
 84	 21	694.8	106.7	 16
 85	 21	94.8	14.7	 16
 86	 21	132.3	32.7	 16
 87	 21	137.3	26.3	 16
 88	 21	119.8	21.1	 16
 89	 21	92.0	10.3	 16
 90	 21	66.5	12.4	 16
 91	 21	167.3	29.1	 16
 92	 21	226.5	33.9	 16
 93	 21	243.3	37.9	 16
 94	 21	522.0	96.5	 16
 95	 21	513.5	44.9	 16
 96	 21	116.3	16.7	 20
 97	 21	175.5	21.5	 16
 98	 21	92.0	15.4	 16
 99	 21	55.3	9.8	 16
100	 21	88.0	12.6	 16
101	 21	157.3	25.5	 16
102	 21	99.8	18.7	 16
103	 21	69.5	7.4	 16
104	 21	121.3	17.8	 16
105	 21	114.0	15.5	 16
106	 21	130.3	20.0	 16
107	 21	205.8	36.8	 16
108	 21	80.0	16.8	 16
109	 21	163.5	23.5	 16
110	 21	92.5	21.6	 16
111	 21	90.5	21.4	 16
112	 21	616.5	94.9	 16
113	 21	72.0	17.4	 16
114	 21	68.5	15.3	 16
115	 21	69.0	13.4	 16
116	 21	73.0	11.6	 16
117	 21	59.0	13.4	 16
118	 21	82.0	13.0	 16
119	 21	56.5	11.1	 16
120	 21	99.0	9.9	 16
121	 21	546.3	56.6	 16
122	 21	723.5	102.7	 16
123	 21	118.3	20.2	 16
124	 21	125.0	26.2	 16
125	 21	116.3	21.6	 16
126	 21	94.8	17.2	 16
127	 21	103.0	142.8	 16
128	 21	66.5	12.3	 16
129	 21	175.3	29.2	 16
130	 21	96.3	16.2	 16
131	 21	70.5	16.3	 16
132	 21	145.8	23.6	 16
133	 21	235.5	28.7	 16
134	 21	132.8	18.5	 16
135	 21	84.0	16.2	 16
136	 21	193.3	30.8	 16
137	 21	217.3	29.7	 16
138	 21	90.3	13.3	 16
139	 21	326.8	30.7	 16
140	 21	128.8	23.5	 16
141	 21	84.0	10.6	 16
142	 21	139.3	11.6	 16
143	 21	70.3	10.8	 16
144	 21	213.5	34.0	 16
145	 21	85.8	17.9	 16
146	 21	63.3	14.6	 16
147	 21	125.5	17.9	 16
148	 21	85.3	15.1	 16
149	 21	118.0	13.6	 16
150	 21	86.3	9.7	 16
151	 21	119.3	12.7	 16
152	 21	547.0	57.1	 16
153	 21	86.3	17.8	 16
154	 21	89.0	18.3	 16
155	 21	113.5	22.3	 16
156	 21	153.0	25.1	 16
157	 21	305.8	40.3	 16
158	 21	99.0	15.1	 16
159	 21	78.0	14.4	 16
160	 21	397.5	48.7	 16
161	 21	67.3	9.0	 16
162	 21	335.8	32.6	 16
163	 21	72.0	14.2	 16
164	 21	107.3	22.0	 16
165	 21	65.8	10.4	 16
166	 21	62.5	17.4	 16
167	 21	138.5	44.0	 16
168	 21	112.8	17.4	 16
169	 21	104.3	24.6	 16
170	 21	71.5	15.3	 16
171	 21	207.5	28.8	 16
172	 21	130.5	22.4	 16
173	 21	158.8	15.6	 16
174	 21	88.5	10.2	 16
175	 21	83.8	13.8	 16
176	 21	139.3	71.5	 16
177	 21	82.8	12.2	 16
178	 21	103.3	19.6	 16
179	 21	129.5	22.1	 16
180	 21	192.3	33.9	 16
181	 21	57.5	11.6	 16
182	 21	125.3	68.3	 16
183	 21	72.0	27.6	 16
184	 21	64.0	11.5	 16
185	 21	59.8	13.4	 16
186	 21	67.3	11.7	 16
187	 21	58.5	10.8	 16
188	 21	57.0	10.5	 16
189	 21	431.0	64.1	 16
190	 21	98.0	15.6	 16
191	 21	265.0	33.6	 16
192	 21	109.8	13.9	 16
193	 21	84.5	20.2	 16
194	 21	83.5	12.9	 16
195	 21	68.0	15.4	 16
196	 21	138.5	25.1	 16
197	 21	73.5	15.8	 16
198	 21	75.0	10.8	 16
199	 21	200.0	26.5	 16
200	 21	80.3	9.0	 16
201	 21	66.3	9.1	 16
202	 21	64.8	56.1	 16
203	 21	80.5	13.3	 16
204	 21	55.3	18.5	 16
205	 21	64.8	13.4	 16
206	 21	88.3	12.1	 16
207	 21	65.3	11.7	 16
208	 21	118.3	23.2	 16
209	 21	74.5	10.7	 16
210	 21	85.8	16.2	 16
211	 21	54.0	8.2	 16
212	 21	84.8	15.6	 16
213	 21	71.0	10.3	 16
214	 21	77.0	15.0	 16
215	 21	101.8	29.6	 16
216	 21	92.0	18.6	 16
217	 21	66.3	10.9	 16
218	 21	129.8	22.3	 16
219	 21	156.3	29.6	 16
220	 21	122.8	24.5	 16
221	 21	130.3	19.6	 16
222	 21	62.5	9.4	 16
223	 21	64.0	9.1	 16
224	 21	131.3	22.9	 16
225	 21	64.5	12.7	 16
226	 21	63.3	12.8	 16
227	 21	501.3	113.3	 16
228	 21	90.8	11.4	 16
229	 21	263.0	28.4	 16
230	 21	344.0	56.3	 16
231	 21	168.3	41.1	 16
232	 21	189.0	40.0	 16
233	 21	68.5	13.5	 16
234	 21	106.3	17.8	 16
235	 21	163.3	22.1	 16
236	 21	54.8	12.3	 16
237	 21	74.5	13.1	 16
238	 21	74.3	9.9	 16
239	 21	92.3	12.9	 20
240	 21	103.0	15.9	 16
241	 21	131.8	21.5	 16
242	 21	55.3	9.0	 16
243	 21	370.0	73.4	 16
244	 21	112.0	25.5	 16
245	 21	153.3	24.5	 16
246	 21	212.8	39.7	 16
247	 21	96.0	17.2	 16
248	 21	180.5	31.0	 16
249	 21	206.3	91.7	 16
250	 21	66.0	9.2	 16
251	 21	51.0	9.0	 16
252	 21	77.8	15.3	 16
253	 21	58.3	9.4	 16
254	 21	51.0	7.5	 16
255	 21	102.0	22.1	 16
256	 21	106.3	14.4	 16
257	 21	115.0	15.7	 16
258	 21	97.5	12.2	 16
259	 21	64.8	13.4	 16
260	 21	84.3	17.7	 16
261	 21	64.0	11.5	 16
262	 21	421.8	41.4	 16
263	 21	1728.0	281.4	 16
264	 21	59.0	11.2	 16
265	 21	89.3	597.2	 16
266	 21	179.3	82.0	 16
267	 21	99.3	16.9	 16
268	 21	104.0	16.0	 16
269	 21	195.3	21.3	 16
270	 21	163.8	23.3	 16
271	 21	62.3	10.6	 16
272	 21	59.0	15.1	 16
273	 21	53.5	8.9	 16
274	 21	91.8	16.8	 16
275	 21	137.3	23.6	 16
276	 21	118.0	17.2	 16
277	 21	56.5	15.9	 16
278	 21	106.5	50.8	 16
279	 21	113.5	23.8	 16
280	 21	65.5	10.8	 16
281	 21	102.3	19.8	 16
282	 21	57.3	10.8	 16
283	 21	103.3	24.1	 16
284	 21	45.5	5.6	 16
285	 21	53.0	8.6	 16
286	 21	73.5	11.4	 16
287	 21	120.0	18.4	 16
288	 21	292.5	35.0	 16
289	 21	96.5	17.3	 16
290	 21	99.3	17.6	 16
291	 21	96.8	21.3	 16
292	 21	72.3	13.3	 16
293	 21	241.5	28.5	 16
294	 21	200.3	18.5	 16
295	 21	63.3	8.2	 16
296	 21	103.0	23.3	 16
297	 21	59.8	10.4	 16
298	 21	70.0	12.3	 16
299	 21	105.8	15.5	 16
300	 21	101.5	17.1	 16
301	 21	99.3	16.9	 16
302	 21	208.8	16.8	 16
303	 21	372.3	39.0	 16
304	 21	342.8	47.8	 16
305	 21	1004.3	177.7	 16
306	 21	145.3	18.3	 16
307	 21	74.5	15.2	 16
308	 21	66.5	13.6	 16
309	 21	133.5	22.1	 16
310	 21	127.3	18.1	 16
311	 21	158.8	19.0	 16
312	 21	68.3	10.3	 16
313	 21	161.5	26.8	 16
314	 21	66.0	10.1	 16
315	 21	54.3	9.4	 16
316	 21	83.5	14.0	 16
317	 21	246.3	41.0	 16
318	 21	678.3	70.4	 16
319	 21	61.3	11.8	 16
320	 21	123.5	28.9	 16
321	 21	459.0	99.5	 16
322	 21	1895.8	276.6	 16
323	 21	297.8	39.2	 16
324	 21	72.3	11.8	 16
325	 21	78.3	9.0	 16
326	 21	123.8	20.3	 16
327	 21	73.8	16.4	 16
328	 21	59.5	9.2	 16
329	 21	123.8	26.1	 16
330	 21	57.3	11.4	 16
331	 21	95.0	20.5	 16
332	 21	165.0	15.1	 16
333	 21	165.0	70.3	 16
334	 21	149.5	21.6	 16
335	 21	239.3	29.1	 16
336	 21	74.3	14.2	 16
337	 21	105.5	15.6	 16
338	 21	133.3	20.6	 16
339	 21	110.3	34.0	 16
340	 21	205.0	93.1	 16
341	 21	737.5	59.1	 16
342	 21	82.5	16.8	 16
343	 21	73.3	10.5	 16
344	 21	130.8	23.6	 16
345	 21	78.0	50.7	 16
346	 21	100.3	40.5	 16
347	 21	101.3	11.0	 16
348	 21	670.5	129.7	 16
349	 21	671.0	65.2	 16
350	 21	75.8	11.3	 16
351	 21	91.5	14.7	 16
352	 21	82.0	12.5	 16
353	 21	128.5	21.7	 16
354	 21	78.3	11.2	 16
355	 21	2000.5	337.2	 16
356	 21	150.0	18.4	 16
357	 21	481.8	38.3	 16
358	 21	244.0	20.0	 16
359	 21	306.3	23.7	 16
360	 21	322.8	30.8	 16
361	 21	456.0	213.0	 16
362	 21	74.5	13.3	 16
363	 21	79.3	17.4	 16
364	 21	64.8	14.8	 16
365	 21	97.5	13.5	 16
366	 21	141.3	21.3	 16
367	 21	276.8	42.2	 16
368	 21	126.3	27.7	 16
369	 21	170.0	25.3	 16
370	 21	114.5	12.9	 16
371	 21	174.8	21.1	 16
372	 21	114.3	19.1	 16
373	 21	63.5	15.1	 16
374	 21	81.5	13.5	 16
375	 21	112.5	17.2	 16
376	 21	70.0	10.3	 16
377	 21	88.5	19.9	 16
378	 21	103.3	12.6	 16
379	 21	74.5	10.4	 16
380	 21	75.3	11.1	 16
381	 21	61.0	8.8	 20
382	 21	91.3	13.9	 16
383	 21	68.0	15.2	 16
384	 21	56.3	13.3	 16
385	 21	74.8	14.9	 16
386	 21	61.3	10.2	 16
387	 21	73.0	12.3	 16
388	 21	70.8	13.4	 16
389	 21	117.5	12.9	 16
390	 21	71.8	9.0	 16
391	 21	62.3	9.3	 16
392	 21	332.0	46.8	 16
393	 21	333.0	39.8	 16
394	 21	65.5	13.1	 16
395	 21	80.8	11.3	 16
396	 21	226.3	25.5	 16
397	 21	2636.8	282.9	 16
398	 21	110.5	39.7	 16
399	 21	107.3	17.1	 16
400	 21	110.3	15.6	 16
401	 21	82.0	16.0	 16
402	 21	58.5	12.7	 16
403	 21	94.3	56.5	 16
404	 21	76.3	8.2	 16
405	 21	56.0	11.8	 16
406	 21	148.5	20.0	 16
407	 21	123.0	19.6	 16
408	 21	91.0	15.0	 16
409	 21	65.0	12.4	 16
410	 21	60.0	12.3	 16
411	 21	72.0	14.6	 16
412	 21	599.5	74.9	 16
413	 21	97.8	18.7	 16
414	 21	185.5	48.6	 16
415	 21	83.5	11.1	 16
416	 21	110.5	19.3	 16
417	 21	94.0	26.3	 16
418	 21	261.3	39.8	 16
419	 21	260.3	39.8	 16
420	 21	64.0	12.9	 16
421	 21	94.8	16.7	 16
422	 21	88.3	13.2	 16
423	 21	80.3	14.5	 16
424	 21	287.5	29.1	 16
425	 21	179.0	25.7	 16
426	 21	180.5	26.1	 16
427	 21	136.8	57.7	 16
428	 21	138.3	16.7	 16
429	 21	126.8	22.7	 16
430	 21	131.8	21.8	 16
431	 21	92.0	11.9	 16
432	 21	152.0	20.4	 16
433	 21	201.8	27.5	 16
434	 21	175.8	21.3	 16
435	 21	181.3	21.8	 16
436	 21	65.5	8.0	 16
437	 21	75.8	10.0	 16
438	 21	215.8	31.3	 16
439	 21	69.8	9.4	 16
440	 21	98.5	20.4	 16
441	 21	146.3	16.0	 16
442	 21	83.3	12.1	 16
443	 21	80.0	14.6	 16
444	 21	101.8	18.8	 16
445	 21	67.0	16.3	 16
446	 21	97.3	18.1	 16
447	 21	101.8	16.1	 16
448	 21	144.8	11.8	 16
449	 21	2473.8	369.9	 16
450	 21	181.3	14.2	 16
451	 21	141.3	21.5	 16
452	 21	129.8	25.4	 16
453	 21	77.3	13.2	 16
454	 21	105.5	19.0	 16
455	 21	93.0	14.8	 16
456	 21	132.3	16.7	 16
457	 21	94.3	12.1	 16
458	 21	137.8	17.4	 16
459	 21	135.8	20.2	 16
460	 21	172.3	40.5	 16
461	 21	122.3	16.9	 16
462	 21	629.5	133.9	 16
463	 21	189.8	40.0	 16
464	 21	66.5	17.4	 16
465	 21	72.0	16.7	 16
466	 21	87.0	21.2	 16
467	 21	114.3	26.9	 16
468	 21	194.5	26.7	 16
469	 21	102.3	15.1	 16
470	 21	96.8	14.7	 16
471	 21	81.0	67.3	 16
472	 21	78.5	15.4	 16
473	 21	94.0	14.0	 16
474	 21	64.0	11.7	 16
475	 21	67.3	12.5	 16
476	 21	206.0	22.8	 16
477	 21	324.8	31.1	 16
478	 21	144.0	18.8	 16
479	 21	84.0	18.4	 16
480	 21	67.5	14.7	 16
481	 21	58.5	11.0	 16
482	 21	74.0	9.9	 16
483	 21	70.3	12.8	 16
484	 21	56.3	12.6	 16
485	 21	69.5	21.3	 16
486	 21	97.3	16.9	 16
487	 21	223.5	30.9	 16
488	 21	82.8	12.6	 16
489	 21	85.3	17.2	 16
490	 21	157.0	24.8	 16
491	 21	158.5	19.5	 16
492	 21	126.0	16.7	 16
493	 21	103.0	11.4	 16
494	 21	134.8	15.9	 16
495	 21	105.3	40.4	 16
496	 21	93.0	16.0	 16
497	 21	57.5	12.2	 16
498	 21	72.8	10.0	 16
499	 21	114.5	19.7	 16
500	 21	111.3	13.2	 16
501	 21	190.0	31.8	 16
502	 21	171.0	23.5	 16
503	 21	109.8	14.1	 16
504	 21	117.0	15.4	 16
505	 21	328.3	72.0	 16
506	 21	60.0	10.0	 16
507	 21	175.5	34.5	 16
508	 21	75.5	15.3	 16
509	 21	64.3	15.0	 16
510	 21	66.0	12.7	 16
511	 21	1137.8	232.4	 16
512	 21	78.0	14.0	 16
513	 21	62.8	13.2	 16
514	 21	70.5	15.9	 16
515	 21	154.3	34.3	 16
516	 21	208.8	49.9	 16
517	 21	64.0	12.4	 16
518	 21	111.8	15.5	 16
519	 21	62.0	10.5	 16
520	 21	107.0	20.9	 16
521	 21	137.3	21.9	 16
522	 21	136.5	21.7	 16
523	 21	74.3	12.1	 16
524	 21	56.3	9.7	 20
525	 21	58.5	13.7	 16
526	 21	59.5	13.2	 16
527	 21	204.5	41.4	 16
528	 21	137.5	16.7	 16
529	 21	205.8	35.4	 16
530	 21	166.5	21.1	 16
531	 21	73.0	9.6	 16
532	 21	222.5	40.2	 16
533	 21	72.8	17.4	 16
534	 21	64.5	9.4	 16
535	 21	184.5	22.8	 16
536	 21	75.0	12.4	 16
537	 21	116.5	16.3	 16
538	 21	75.3	14.1	 16
539	 21	64.3	9.6	 16
540	 21	58.3	15.2	 16
541	 21	68.0	11.5	 16
542	 21	63.0	9.8	 16
543	 21	178.3	22.7	 16
544	 21	124.0	19.1	 16
545	 21	655.3	97.8	 16
546	 21	757.3	90.7	 16
547	 21	103.3	12.8	 16
548	 21	127.0	14.8	 16
549	 21	75.0	14.0	 16
550	 21	111.0	18.9	 16
551	 21	102.0	20.7	 16
552	 21	136.3	22.7	 16
553	 21	74.0	14.1	 16
554	 21	55.3	8.5	 16
555	 21	59.3	10.0	 16
556	 21	65.3	11.5	 16
557	 21	52.3	10.3	 16
558	 21	62.0	10.3	 16
559	 21	70.3	14.9	 16
560	 21	86.3	19.8	 16
561	 21	84.8	13.3	 16
562	 21	142.0	24.0	 16
563	 21	189.3	24.1	 16
564	 21	179.3	25.5	 16
565	 21	61.3	7.5	 16
566	 21	102.5	19.7	 16
567	 21	59.0	9.7	 16
568	 21	162.3	23.6	 16
569	 21	85.0	15.6	 16
570	 21	70.8	12.7	 16
571	 21	87.5	18.6	 16
572	 21	75.8	16.1	 16
573	 21	81.8	14.1	 16
574	 21	122.3	25.1	 16
575	 21	114.0	12.4	 16
576	 21	193.3	29.7	 16
577	 21	154.0	22.0	 16
578	 21	115.0	17.8	 16
579	 21	175.0	21.4	 16
580	 21	154.8	21.4	 16
581	 21	73.0	13.5	 16
582	 21	63.8	13.3	 16
583	 21	1734.5	305.8	 16
584	 21	69.5	9.4	 16
585	 21	212.5	38.8	 16
586	 21	89.8	13.8	 16
587	 21	58.3	13.2	 16
588	 21	62.8	13.4	 16
589	 21	77.0	12.4	 16
590	 21	107.5	15.8	 16
591	 21	343.8	52.4	 16
592	 21	244.5	30.1	 16
593	 21	166.3	24.0	 16
594	 21	86.0	13.2	 16
595	 21	88.8	95.3	 16
596	 21	140.5	19.0	 16
597	 21	90.3	14.5	 16
598	 21	102.8	29.0	 16
599	 21	161.3	26.6	 16
600	 21	97.8	17.3	 16
601	 21	91.8	15.1	 16
602	 21	245.5	32.5	 16
603	 21	132.0	20.0	 16
604	 21	123.5	21.6	 16
605	 21	112.3	17.7	 16
606	 21	126.3	23.5	 16
607	 21	120.0	17.0	 16
608	 21	131.5	17.0	 16
609	 21	260.8	44.4	 16
610	 21	102.5	21.2	 16
611	 21	73.3	13.8	 16
612	 21	150.5	20.8	 16
613	 21	251.8	44.0	 16
614	 21	171.8	26.3	 16
615	 21	139.8	15.2	 16
616	 21	312.8	38.1	 16
617	 21	145.3	17.9	 16
618	 21	75.0	11.2	 16
619	 21	302.3	37.7	 16
620	 21	117.8	54.4	 16
621	 21	97.3	14.3	 16
622	 21	79.0	12.1	 16
623	 21	94.3	18.9	 16
624	 21	96.8	13.4	 16
625	 21	93.8	13.0	 16
626	 21	211.0	29.0	 16
627	 21	80.5	14.5	 16
628	 21	97.3	21.5	 16
629	 21	95.3	16.5	 16
630	 21	117.0	24.8	 16
631	 21	99.8	18.2	 16
632	 21	327.3	55.8	 16
633	 21	107.5	16.7	 16
634	 21	62.0	8.8	 16
635	 21	405.8	69.5	 16
636	 21	122.0	31.8	 16
637	 21	90.8	13.7	 16
638	 21	341.5	78.2	 16
639	 21	78.0	18.4	 16
640	 21	62.8	11.3	 16
641	 21	255.3	41.1	 16
642	 21	99.5	19.3	 16
643	 21	71.5	10.9	 16
644	 21	78.0	15.8	 16
645	 21	66.0	13.3	 16
646	 21	82.8	15.8	 16
647	 21	81.0	16.0	 16
648	 21	170.0	45.0	 16
649	 21	172.8	27.7	 16
650	 21	118.3	16.4	 16
651	 21	153.0	20.0	 16
652	 21	216.5	24.1	 16
653	 21	226.5	25.6	 16
654	 21	124.0	42.5	 16
655	 21	199.8	30.4	 16
656	 21	2178.8	508.0	 16
657	 21	5547.0	1314.9	 16
658	 21	149.8	41.4	 16
659	 21	74.3	9.5	 16
660	 21	200.8	41.9	 16
661	 21	89.5	15.2	 16
662	 21	1893.8	456.6	 16
663	 21	109.0	18.1	 16
664	 21	382.3	84.1	 16
665	 21	66.8	12.4	 16
666	 21	66.0	11.2	 20
667	 21	50.8	7.4	 16
668	 21	58.0	12.3	 16
669	 21	67.0	14.3	 16
670	 21	64.8	12.9	 16
671	 21	235.0	31.0	 16
672	 21	117.3	15.2	 16
673	 21	144.3	19.5	 16
674	 21	221.5	29.7	 16
675	 21	231.0	35.9	 16
676	 21	292.3	38.4	 16
677	 21	153.5	23.0	 16
678	 21	72.0	13.6	 16
679	 21	135.0	27.5	 16
680	 21	60.3	11.4	 16
681	 21	97.3	14.9	 16
682	 21	213.8	55.0	 16
683	 21	59.0	12.8	 16
684	 21	61.5	10.6	 16
685	 21	65.0	17.7	 16
686	 21	77.0	16.5	 16
687	 21	142.3	22.1	 16
688	 21	89.5	17.6	 16
689	 21	501.8	66.6	 16
690	 21	507.5	33.1	 16
691	 21	183.5	53.5	 16
692	 21	124.5	64.6	 16
693	 21	273.0	34.5	 16
694	 21	202.5	28.8	 16
695	 21	98.0	15.8	 16
696	 21	122.8	12.8	 16
697	 21	156.0	20.5	 16
698	 21	132.5	26.2	 16
699	 21	62.0	15.6	 16
700	 21	391.5	42.6	 16
701	 21	130.8	25.3	 16
702	 21	72.3	13.5	 16
703	 21	83.5	16.9	 16
704	 21	115.5	13.3	 16
705	 21	119.5	20.0	 16
706	 21	348.5	37.5	 16
707	 21	244.3	31.4	 16
708	 21	119.0	17.9	 16
709	 21	203.3	47.0	 16
710	 21	352.5	41.5	 16
711	 21	113.0	18.5	 16
  0	 22	8113.8	904.6	 16
  1	 22	226.3	28.1	 16
  2	 22	81.5	18.5	 16
  3	 22	73.5	11.6	 16
  4	 22	133.8	23.4	 16
  5	 22	70.0	11.4	 16
  6	 22	56.5	8.0	 16
  7	 22	152.3	17.1	 16
  8	 22	142.0	19.4	 16
  9	 22	103.8	21.4	 16
 10	 22	199.0	22.1	 16
 11	 22	114.5	15.1	 16
 12	 22	115.3	20.4	 16
 13	 22	63.0	11.8	 16
 14	 22	130.3	20.9	 16
 15	 22	188.0	45.0	 16
 16	 22	75.0	9.3	 16
 17	 22	137.8	23.1	 16
 18	 22	130.3	18.4	 16
 19	 22	89.5	18.7	 16
 20	 22	57.5	10.7	 16
 21	 22	114.8	19.3	 16
 22	 22	121.0	16.2	 16
 23	 22	76.0	13.0	 16
 24	 22	65.3	10.6	 16
 25	 22	97.0	16.0	 16
 26	 22	80.0	21.3	 16
 27	 22	86.0	24.7	 16
 28	 22	64.3	12.2	 16
 29	 22	83.8	28.0	 16
 30	 22	172.8	25.0	 16
 31	 22	164.0	20.1	 16
 32	 22	69.8	16.1	 16
 33	 22	111.5	14.9	 16
 34	 22	93.8	18.4	 16
 35	 22	58.3	9.2	 16
 36	 22	66.3	11.3	 16
 37	 22	59.3	18.3	 16
 38	 22	119.3	26.0	 16
 39	 22	260.8	30.3	 16
 40	 22	143.3	20.1	 16
 41	 22	144.5	16.8	 16
 42	 22	67.5	11.5	 16
 43	 22	65.5	10.5	 16
 44	 22	63.0	11.3	 16
 45	 22	61.0	12.2	 16
 46	 22	73.0	13.2	 16
 47	 22	65.0	13.0	 16
 48	 22	95.3	125.1	 16
 49	 22	63.3	10.0	 16
 50	 22	64.8	11.5	 16
 51	 22	104.5	19.0	 16
 52	 22	98.8	41.1	 16
 53	 22	63.5	15.9	 16
 54	 22	76.0	11.5	 16
 55	 22	70.0	13.1	 16
 56	 22	120.0	25.9	 16
 57	 22	245.0	37.4	 16
 58	 22	124.3	19.2	 16
 59	 22	117.3	19.3	 16
 60	 22	66.5	9.6	 16
 61	 22	75.3	15.1	 16
 62	 22	71.3	14.8	 16
 63	 22	139.5	21.9	 16
 64	 22	95.0	12.3	 16
 65	 22	91.0	20.3	 16
 66	 22	110.3	22.2	 16
 67	 22	72.0	13.8	 16
 68	 22	221.0	37.7	 16
 69	 22	378.0	56.6	 16
 70	 22	335.0	49.8	 16
 71	 22	69.5	11.9	 16
 72	 22	74.0	13.3	 16
 73	 22	483.8	73.1	 16
 74	 22	112.5	17.5	 16
 75	 22	93.0	20.0	 16
 76	 22	74.0	13.9	 16
 77	 22	87.5	17.0	 16
 78	 22	147.3	23.8	 16
 79	 22	67.3	13.4	 16
 80	 22	78.0	8.0	 16
 81	 22	178.0	20.4	 16
 82	 22	194.5	32.4	 16
 83	 22	122.5	21.1	 16
 84	 22	222.0	31.0	 16
 85	 22	114.3	21.9	 16
 86	 22	92.5	13.1	 16
 87	 22	174.8	18.8	 16
 88	 22	70.0	16.9	 16
 89	 22	126.0	25.0	 16
 90	 22	69.3	14.4	 16
 91	 22	227.5	34.1	 16
 92	 22	328.0	51.5	 16
 93	 22	98.5	18.1	 16
 94	 22	225.3	53.7	 16
 95	 22	230.5	30.0	 16
 96	 22	110.3	11.3	 16
 97	 22	175.0	24.2	 16
 98	 22	83.0	14.7	 20
 99	 22	90.0	68.2	 16
100	 22	69.5	13.9	 16
101	 22	80.0	13.1	 16
102	 22	77.5	12.1	 16
103	 22	63.3	13.0	 16
104	 22	94.3	8.1	 16
105	 22	246.3	31.0	 16
106	 22	211.3	34.7	 16
107	 22	64.3	11.9	 16
108	 22	63.8	11.3	 16
109	 22	204.0	31.9	 16
110	 22	81.0	12.6	 16
111	 22	94.8	21.3	 16
112	 22	168.5	99.5	 16
113	 22	60.0	8.9	 16
114	 22	71.8	12.9	 16
115	 22	59.0	9.8	 16
116	 22	67.3	12.9	 16
117	 22	68.5	16.4	 16
118	 22	62.5	10.4	 16
119	 22	52.5	10.2	 16
120	 22	125.3	25.6	 16
121	 22	146.5	28.1	 16
122	 22	102.3	17.1	 16
123	 22	88.0	17.0	 16
124	 22	75.3	11.4	 16
125	 22	77.0	19.7	 16
126	 22	219.5	204.1	 16
127	 22	58.8	8.6	 16
128	 22	64.0	13.6	 16
129	 22	221.8	25.5	 16
130	 22	98.5	14.1	 16
131	 22	72.0	13.9	 16
132	 22	95.3	17.0	 16
133	 22	168.3	14.7	 16
134	 22	82.0	13.4	 16
135	 22	82.0	17.0	 16
136	 22	115.0	25.4	 16
137	 22	145.8	30.8	 16
138	 22	83.0	10.0	 16
139	 22	108.8	14.5	 16
140	 22	94.5	16.7	 16
141	 22	59.5	12.7	 16
142	 22	78.0	16.6	 16
143	 22	66.3	14.0	 16
144	 22	162.5	19.3	 16
145	 22	100.8	21.6	 16
146	 22	64.5	11.8	 16
147	 22	65.0	9.9	 16
148	 22	114.0	57.0	 16
149	 22	63.8	10.1	 16
150	 22	84.5	22.8	 16
151	 22	84.3	13.9	 16
152	 22	466.5	33.8	 16
153	 22	95.3	33.1	 16
154	 22	67.3	11.7	 16
155	 22	91.8	27.6	 16
156	 22	128.0	24.1	 16
157	 22	105.0	15.8	 16
158	 22	86.5	15.4	 16
159	 22	92.5	16.7	 16
160	 22	169.5	34.0	 16
161	 22	68.3	14.1	 16
162	 22	164.3	17.8	 16
163	 22	61.3	9.7	 16
164	 22	60.8	15.9	 16
165	 22	63.5	11.7	 16
166	 22	54.0	8.7	 16
167	 22	122.0	19.7	 16
168	 22	87.5	9.5	 16
169	 22	73.3	11.5	 16
170	 22	65.3	10.5	 16
171	 22	142.8	30.0	 16
172	 22	83.3	53.6	 16
173	 22	182.5	42.5	 16
174	 22	96.5	19.2	 16
175	 22	59.5	13.2	 16
176	 22	106.0	11.4	 16
177	 22	106.0	22.8	 16
178	 22	89.3	12.7	 16
179	 22	68.0	10.5	 16
180	 22	125.5	16.2	 16
181	 22	64.5	12.6	 16
182	 22	63.3	13.5	 16
183	 22	69.3	15.5	 16
184	 22	51.0	7.8	 16
185	 22	78.8	38.9	 16
186	 22	55.8	16.2	 16
187	 22	49.3	13.1	 16
188	 22	66.0	12.8	 16
189	 22	156.5	26.1	 16
190	 22	66.5	17.7	 16
191	 22	96.0	19.2	 16
192	 22	85.8	14.9	 16
193	 22	75.3	9.7	 16
194	 22	61.0	13.6	 16
195	 22	62.5	11.9	 16
196	 22	79.0	7.3	 16
197	 22	55.3	9.7	 16
198	 22	55.5	14.2	 16
199	 22	256.0	32.8	 16
200	 22	70.0	13.5	 16
201	 22	64.3	11.1	 16
202	 22	61.0	12.9	 16
203	 22	63.3	19.2	 16
204	 22	53.5	14.0	 16
205	 22	72.0	19.0	 16
206	 22	75.0	11.6	 16
207	 22	68.3	11.6	 16
208	 22	114.3	20.2	 16
209	 22	98.0	20.9	 16
210	 22	180.0	24.9	 16
211	 22	65.5	11.6	 16
212	 22	70.8	12.6	 16
213	 22	71.5	12.2	 16
214	 22	83.8	13.5	 16
215	 22	61.8	11.5	 16
216	 22	175.0	24.0	 16
217	 22	60.5	11.4	 16
218	 22	63.0	11.0	 16
219	 22	121.5	19.7	 16
220	 22	81.3	10.4	 16
221	 22	91.3	19.7	 16
222	 22	70.3	17.4	 16
223	 22	60.8	15.0	 16
224	 22	65.5	12.8	 16
225	 22	66.3	24.7	 16
226	 22	65.5	10.1	 16
227	 22	165.3	46.2	 16
228	 22	93.3	16.0	 16
229	 22	237.8	28.4	 16
230	 22	117.5	15.5	 16
231	 22	62.0	12.8	 16
232	 22	61.5	12.8	 16
233	 22	62.8	11.9	 16
234	 22	157.3	26.9	 16
235	 22	154.0	24.5	 16
236	 22	64.5	12.8	 16
237	 22	59.3	10.6	 16
238	 22	57.3	8.9	 16
239	 22	91.8	31.3	 16
240	 22	84.5	13.9	 20
241	 22	106.8	19.0	 16
242	 22	70.0	10.5	 16
243	 22	189.5	23.8	 16
244	 22	109.3	19.7	 16
245	 22	106.0	13.9	 16
246	 22	152.5	27.3	 16
247	 22	77.5	9.6	 16
248	 22	237.8	43.7	 16
249	 22	102.3	15.5	 16
250	 22	80.3	19.1	 16
251	 22	63.8	11.8	 16
252	 22	63.0	12.0	 16
253	 22	55.5	10.5	 16
254	 22	87.0	22.3	 16
255	 22	87.3	12.8	 16
256	 22	104.5	19.5	 16
257	 22	93.0	53.9	 16
258	 22	82.5	13.2	 16
259	 22	65.3	10.8	 16
260	 22	88.3	20.5	 16
261	 22	79.8	10.7	 16
262	 22	236.3	25.5	 16
263	 22	355.3	74.6	 16
264	 22	51.0	11.7	 16
265	 22	68.5	16.0	 16
266	 22	138.8	20.1	 16
267	 22	143.0	23.3	 16
268	 22	168.0	22.9	 16
269	 22	127.8	22.3	 16
270	 22	71.5	13.0	 16
271	 22	60.5	20.9	 16
272	 22	60.3	9.6	 16
273	 22	61.5	10.5	 16
274	 22	82.8	18.3	 16
275	 22	79.8	14.2	 16
276	 22	85.3	16.4	 16
277	 22	70.8	18.2	 16
278	 22	62.3	8.6	 16
279	 22	80.3	23.3	 16
280	 22	72.3	12.3	 16
281	 22	65.5	11.7	 16
282	 22	62.0	6.3	 16
283	 22	57.3	11.0	 16
284	 22	57.3	13.8	 16
285	 22	57.5	10.3	 16
286	 22	64.5	12.2	 16
287	 22	104.8	90.4	 16
288	 22	152.5	32.3	 16
289	 22	99.8	15.8	 16
290	 22	132.0	38.8	 16
291	 22	83.0	12.6	 16
292	 22	81.0	15.5	 16
293	 22	134.3	24.7	 16
294	 22	130.8	19.4	 16
295	 22	68.3	13.1	 16
296	 22	94.3	15.7	 16
297	 22	76.8	18.8	 16
298	 22	71.5	12.7	 16
299	 22	77.0	12.0	 16
300	 22	66.8	15.1	 16
301	 22	90.5	18.7	 16
302	 22	544.8	84.3	 16
303	 22	208.5	25.8	 16
304	 22	267.5	42.1	 16
305	 22	244.5	36.0	 16
306	 22	109.3	16.1	 16
307	 22	76.0	14.0	 16
308	 22	64.0	11.8	 16
309	 22	98.5	18.2	 16
310	 22	108.5	16.0	 16
311	 22	84.5	15.7	 16
312	 22	70.0	16.4	 16
313	 22	139.3	13.8	 16
314	 22	66.5	12.4	 16
315	 22	66.0	12.5	 16
316	 22	87.3	15.3	 16
317	 22	678.0	92.9	 16
318	 22	203.3	29.5	 16
319	 22	71.8	13.3	 16
320	 22	111.5	32.9	 16
321	 22	96.0	15.1	 16
322	 22	251.3	41.7	 16
323	 22	75.5	24.0	 16
324	 22	68.5	10.4	 16
325	 22	101.0	45.0	 16
326	 22	113.0	141.6	 16
327	 22	63.3	10.7	 16
328	 22	56.5	8.9	 16
329	 22	58.0	8.9	 16
330	 22	49.5	8.7	 16
331	 22	83.3	19.4	 16
332	 22	112.0	17.8	 16
333	 22	79.3	15.8	 16
334	 22	88.5	16.5	 16
335	 22	539.0	72.1	 16
336	 22	72.5	14.5	 16
337	 22	96.3	12.7	 16
338	 22	264.0	31.9	 16
339	 22	79.0	9.7	 16
340	 22	198.5	20.6	 16
341	 22	158.0	28.1	 16
342	 22	147.8	22.9	 16
343	 22	95.5	13.8	 16
344	 22	79.3	11.6	 16
345	 22	80.5	12.4	 16
346	 22	76.5	11.7	 16
347	 22	89.3	21.0	 16
348	 22	176.5	39.1	 16
349	 22	162.8	20.0	 16
350	 22	66.3	10.9	 16
351	 22	66.8	8.3	 16
352	 22	81.8	19.5	 16
353	 22	80.8	14.6	 16
354	 22	75.5	18.3	 16
355	 22	404.8	62.5	 16
356	 22	119.5	19.3	 16
357	 22	707.0	78.8	 16
358	 22	265.3	23.8	 16
359	 22	245.8	25.2	 16
360	 22	245.3	35.7	 16
361	 22	163.8	26.5	 16
362	 22	69.0	11.7	 16
363	 22	70.0	14.9	 16
364	 22	61.5	11.8	 16
365	 22	79.3	15.0	 16
366	 22	94.3	17.9	 16
367	 22	124.3	23.5	 16
368	 22	174.3	23.4	 16
369	 22	78.3	20.7	 16
370	 22	101.3	12.1	 16
371	 22	145.8	18.6	 16
372	 22	93.0	21.2	 16
373	 22	60.3	11.0	 16
374	 22	81.8	21.4	 16
375	 22	72.8	14.6	 16
376	 22	85.5	17.0	 16
377	 22	132.8	22.1	 16
378	 22	112.5	13.8	 16
379	 22	62.3	7.6	 16
380	 22	72.0	14.1	 16
381	 22	54.3	9.8	 16
382	 22	59.5	11.1	 16
383	 22	60.3	9.7	 20
384	 22	58.3	11.8	 16
385	 22	75.8	21.1	 16
386	 22	66.3	13.7	 16
387	 22	64.3	13.1	 16
388	 22	79.0	17.9	 16
389	 22	82.5	14.4	 16
390	 22	67.5	11.8	 16
391	 22	48.8	6.6	 16
392	 22	77.3	14.9	 16
393	 22	78.3	16.6	 16
394	 22	67.5	12.1	 16
395	 22	84.8	15.8	 16
396	 22	91.0	52.3	 16
397	 22	97.5	13.4	 16
398	 22	196.0	138.4	 16
399	 22	88.3	16.3	 16
400	 22	78.5	10.3	 16
401	 22	74.5	20.6	 16
402	 22	56.3	7.6	 16
403	 22	63.5	8.6	 16
404	 22	92.0	17.1	 16
405	 22	60.3	7.9	 16
406	 22	95.0	15.1	 16
407	 22	108.5	21.8	 16
408	 22	97.8	22.8	 16
409	 22	63.0	9.1	 16
410	 22	61.3	11.5	 16
411	 22	71.8	14.0	 16
412	 22	169.0	29.5	 16
413	 22	83.0	12.8	 16
414	 22	86.5	44.3	 16
415	 22	66.0	11.6	 16
416	 22	60.8	9.3	 16
417	 22	99.5	14.0	 16
418	 22	101.8	23.8	 16
419	 22	96.5	13.3	 16
420	 22	70.5	8.9	 16
421	 22	153.0	30.5	 16
422	 22	79.5	10.5	 16
423	 22	70.5	14.0	 16
424	 22	237.3	34.8	 16
425	 22	107.0	17.8	 16
426	 22	156.3	29.9	 16
427	 22	119.3	30.3	 16
428	 22	407.8	51.8	 16
429	 22	173.8	26.5	 16
430	 22	112.0	14.4	 16
431	 22	80.3	21.3	 16
432	 22	130.8	22.8	 16
433	 22	274.3	61.5	 16
434	 22	264.8	18.2	 16
435	 22	284.5	60.3	 16
436	 22	81.5	15.4	 16
437	 22	73.8	25.5	 16
438	 22	65.0	22.8	 16
439	 22	79.3	14.1	 16
440	 22	92.3	10.1	 16
441	 22	166.3	28.4	 16
442	 22	114.0	23.0	 16
443	 22	75.3	11.8	 16
444	 22	94.5	20.6	 16
445	 22	67.3	15.6	 16
446	 22	70.0	10.6	 16
447	 22	98.0	19.0	 16
448	 22	180.3	26.4	 16
449	 22	683.0	95.1	 16
450	 22	118.3	19.7	 16
451	 22	173.5	13.2	 16
452	 22	106.5	91.4	 16
453	 22	82.3	15.2	 16
454	 22	76.8	14.2	 16
455	 22	90.3	21.7	 16
456	 22	140.3	18.8	 16
457	 22	125.3	15.9	 16
458	 22	126.3	20.7	 16
459	 22	122.0	21.4	 16
460	 22	120.3	18.9	 16
461	 22	244.5	22.4	 16
462	 22	211.3	17.5	 16
463	 22	97.5	19.5	 16
464	 22	57.0	9.8	 16
465	 22	73.3	21.3	 16
466	 22	64.5	9.7	 16
467	 22	56.5	15.1	 16
468	 22	178.8	27.7	 16
469	 22	90.3	15.5	 16
470	 22	114.0	16.3	 16
471	 22	70.3	15.2	 16
472	 22	79.5	14.2	 16
473	 22	76.8	12.1	 16
474	 22	60.5	9.3	 16
475	 22	64.0	14.2	 16
476	 22	107.5	17.0	 16
477	 22	205.3	27.4	 16
478	 22	84.0	14.6	 16
479	 22	111.5	15.3	 16
480	 22	62.3	11.3	 16
481	 22	55.3	8.3	 16
482	 22	59.0	7.7	 16
483	 22	64.8	15.5	 16
484	 22	59.0	12.4	 16
485	 22	57.3	7.7	 16
486	 22	154.3	21.4	 16
487	 22	215.3	27.0	 16
488	 22	79.5	11.4	 16
489	 22	80.3	10.8	 16
490	 22	128.5	19.9	 16
491	 22	180.3	28.3	 16
492	 22	115.3	15.4	 16
493	 22	113.0	19.8	 16
494	 22	159.8	18.7	 16
495	 22	85.0	18.8	 16
496	 22	146.8	24.9	 16
497	 22	55.8	12.5	 16
498	 22	72.3	13.4	 16
499	 22	110.0	13.8	 16
500	 22	130.5	18.7	 16
501	 22	88.0	21.5	 16
502	 22	197.3	24.9	 16
503	 22	88.8	13.0	 16
504	 22	126.3	21.0	 16
505	 22	171.3	21.0	 16
506	 22	86.8	26.1	 16
507	 22	84.3	17.3	 16
508	 22	61.8	20.5	 16
509	 22	78.8	22.2	 16
510	 22	70.0	10.7	 16
511	 22	149.0	44.5	 16
512	 22	72.3	12.4	 16
513	 22	52.8	10.2	 16
514	 22	57.8	10.7	 16
515	 22	87.5	12.9	 16
516	 22	91.0	12.8	 16
517	 22	63.3	9.5	 16
518	 22	74.0	16.8	 16
519	 22	63.5	9.8	 16
520	 22	70.5	9.4	 16
521	 22	64.3	17.5	 16
522	 22	69.8	10.0	 16
523	 22	80.3	9.5	 16
524	 22	57.3	9.2	 16
525	 22	52.0	9.8	 20
526	 22	59.8	11.0	 16
527	 22	139.3	14.8	 16
528	 22	87.8	14.4	 16
529	 22	156.3	10.0	 16
530	 22	142.8	20.5	 16
531	 22	76.8	14.2	 16
532	 22	93.5	18.1	 16
533	 22	67.5	10.3	 16
534	 22	60.3	11.2	 16
535	 22	97.0	15.3	 16
536	 22	66.5	15.9	 16
537	 22	127.5	32.7	 16
538	 22	70.8	9.5	 16
539	 22	72.0	65.0	 16
540	 22	62.5	12.7	 16
541	 22	67.5	11.8	 16
542	 22	70.8	14.4	 16
543	 22	149.8	32.3	 16
544	 22	160.8	25.6	 16
545	 22	351.8	45.2	 16
546	 22	359.5	39.4	 16
547	 22	113.0	40.8	 16
548	 22	102.0	16.0	 16
549	 22	98.3	13.2	 16
550	 22	81.8	13.4	 16
551	 22	69.5	10.4	 16
552	 22	188.0	31.4	 16
553	 22	72.0	13.9	 16
554	 22	60.3	11.7	 16
555	 22	62.0	24.0	 16
556	 22	84.3	113.3	 16
557	 22	51.0	6.6	 16
558	 22	54.5	9.4	 16
559	 22	72.3	11.8	 16
560	 22	77.0	15.1	 16
561	 22	67.0	6.6	 16
562	 22	144.0	20.2	 16
563	 22	136.8	18.9	 16
564	 22	139.8	29.0	 16
565	 22	78.3	104.6	 16
566	 22	63.3	15.7	 16
567	 22	53.3	17.5	 16
568	 22	69.0	13.4	 16
569	 22	70.8	10.8	 16
570	 22	70.3	12.0	 16
571	 22	68.0	16.6	 16
572	 22	71.8	12.2	 16
573	 22	82.5	18.2	 16
574	 22	85.5	15.6	 16
575	 22	122.3	15.1	 16
576	 22	197.3	18.6	 16
577	 22	99.3	15.0	 16
578	 22	91.3	15.5	 16
579	 22	126.3	16.0	 16
580	 22	136.3	10.3	 16
581	 22	77.5	14.1	 16
582	 22	72.5	16.2	 16
583	 22	375.5	70.4	 16
584	 22	94.3	31.3	 16
585	 22	244.3	168.8	 16
586	 22	90.5	19.5	 16
587	 22	62.5	12.7	 16
588	 22	51.8	13.5	 16
589	 22	95.3	17.7	 16
590	 22	110.5	14.0	 16
591	 22	167.3	25.5	 16
592	 22	315.5	33.8	 16
593	 22	133.3	29.0	 16
594	 22	91.8	13.8	 16
595	 22	85.0	15.4	 16
596	 22	83.3	20.3	 16
597	 22	74.8	17.8	 16
598	 22	104.3	21.0	 16
599	 22	123.0	18.6	 16
600	 22	94.0	11.7	 16
601	 22	89.8	10.4	 16
602	 22	112.0	16.7	 16
603	 22	91.5	15.6	 16
604	 22	98.5	13.5	 16
605	 22	152.3	23.2	 16
606	 22	97.5	16.6	 16
607	 22	243.5	26.0	 16
608	 22	98.0	17.6	 16
609	 22	115.5	14.7	 16
610	 22	89.5	19.2	 16
611	 22	79.3	11.7	 16
612	 22	119.3	18.1	 16
613	 22	148.3	22.7	 16
614	 22	170.3	25.8	 16
615	 22	239.0	37.9	 16
616	 22	408.5	50.4	 16
617	 22	158.0	87.9	 16
618	 22	66.3	8.6	 16
619	 22	115.0	23.3	 16
620	 22	69.3	10.9	 16
621	 22	78.5	14.8	 16
622	 22	75.3	14.1	 16
623	 22	91.5	17.3	 16
624	 22	78.0	18.5	 16
625	 22	88.5	19.3	 16
626	 22	102.0	18.2	 16
627	 22	67.0	12.9	 16
628	 22	74.0	12.9	 16
629	 22	87.5	11.8	 16
630	 22	184.0	20.8	 16
631	 22	298.5	33.5	 16
632	 22	250.8	38.9	 16
633	 22	119.5	29.8	 16
634	 22	67.0	15.1	 16
635	 22	88.5	14.1	 16
636	 22	130.8	38.1	 16
637	 22	80.3	20.3	 16
638	 22	102.0	17.2	 16
639	 22	64.5	12.8	 16
640	 22	72.5	12.3	 16
641	 22	149.0	22.0	 16
642	 22	101.0	16.6	 16
643	 22	105.0	44.0	 16
644	 22	78.5	12.1	 16
645	 22	62.0	10.6	 16
646	 22	66.3	11.2	 12
647	 22	126.8	93.2	 16
648	 22	113.3	16.2	 16
649	 22	130.5	13.6	 16
650	 22	144.0	19.7	 16
651	 22	135.5	22.6	 16
652	 22	166.5	20.9	 16
653	 22	144.3	22.7	 16
654	 22	99.3	22.9	 16
655	 22	130.3	17.1	 16
656	 22	564.3	139.3	 16
657	 22	700.0	152.4	 16
658	 22	96.8	15.2	 16
659	 22	108.3	25.4	 16
660	 22	98.8	20.2	 16
661	 22	95.8	17.2	 16
662	 22	583.0	122.0	 16
663	 22	65.0	14.8	 16
664	 22	249.0	36.2	 16
665	 22	63.8	12.6	 16
666	 22	55.0	10.3	 16
667	 22	54.3	9.9	 20
668	 22	55.5	13.6	 16
669	 22	57.3	10.0	 16
670	 22	70.0	11.3	 16
671	 22	126.3	21.5	 16
672	 22	84.3	11.8	 16
673	 22	90.0	16.6	 16
674	 22	168.5	14.1	 16
675	 22	92.8	16.4	 16
676	 22	98.0	12.9	 16
677	 22	85.8	10.3	 16
678	 22	65.5	9.6	 16
679	 22	65.3	14.2	 16
680	 22	62.0	11.6	 16
681	 22	98.8	20.8	 16
682	 22	144.8	31.0	 16
683	 22	63.0	12.2	 16
684	 22	65.5	13.0	 16
685	 22	56.3	22.7	 16
686	 22	71.5	11.0	 16
687	 22	135.0	20.6	 16
688	 22	72.3	14.7	 16
689	 22	213.5	21.5	 16
690	 22	426.3	34.5	 16
691	 22	113.8	19.9	 16
692	 22	83.0	13.4	 16
693	 22	197.8	22.4	 16
694	 22	206.3	24.4	 16
695	 22	99.0	12.5	 16
696	 22	108.3	16.3	 16
697	 22	117.3	20.7	 16
698	 22	67.5	10.5	 16
699	 22	63.8	9.0	 16
700	 22	145.8	20.5	 16
701	 22	133.0	29.2	 16
702	 22	74.8	10.1	 16
703	 22	78.3	11.3	 16
704	 22	94.3	21.3	 16
705	 22	404.3	49.0	 16
706	 22	124.5	21.6	 16
707	 22	123.3	18.5	 16
708	 22	287.8	23.6	 16
709	 22	328.5	27.2	 16
710	 22	172.0	28.3	 16
711	 22	8119.0	796.5	 16
  0	 23	114.3	18.8	 16
  1	 23	182.0	21.9	 16
  2	 23	116.5	17.9	 16
  3	 23	107.5	156.6	 16
  4	 23	667.8	80.5	 16
  5	 23	66.8	10.4	 16
  6	 23	144.3	23.8	 16
  7	 23	152.0	18.0	 16
  8	 23	126.3	17.1	 16
  9	 23	85.5	15.9	 16
 10	 23	76.5	11.8	 16
 11	 23	151.3	16.8	 16
 12	 23	103.3	22.1	 16
 13	 23	122.5	16.8	 16
 14	 23	78.3	9.8	 16
 15	 23	99.3	23.6	 16
 16	 23	116.5	20.8	 16
 17	 23	95.3	14.9	 16
 18	 23	77.3	12.4	 16
 19	 23	178.5	16.8	 16
 20	 23	121.0	24.3	 16
 21	 23	75.0	13.4	 16
 22	 23	139.8	16.1	 16
 23	 23	175.3	18.2	 16
 24	 23	396.5	34.4	 16
 25	 23	303.0	50.4	 16
 26	 23	119.0	81.0	 16
 27	 23	93.8	13.0	 16
 28	 23	62.0	15.0	 16
 29	 23	93.0	13.6	 16
 30	 23	165.3	21.1	 16
 31	 23	144.5	24.7	 16
 32	 23	401.5	52.6	 16
 33	 23	278.5	46.4	 16
 34	 23	75.5	11.7	 16
 35	 23	110.5	147.0	 16
 36	 23	105.5	16.9	 16
 37	 23	107.3	18.2	 16
 38	 23	62.3	7.7	 16
 39	 23	145.3	31.0	 16
 40	 23	88.8	14.2	 16
 41	 23	73.5	15.0	 16
 42	 23	96.0	22.0	 16
 43	 23	66.5	10.0	 16
 44	 23	261.8	25.9	 16
 45	 23	229.8	21.4	 16
 46	 23	113.0	15.0	 16
 47	 23	94.8	19.9	 16
 48	 23	119.3	20.1	 16
 49	 23	139.5	148.0	 16
 50	 23	89.3	21.7	 16
 51	 23	188.5	31.2	 16
 52	 23	351.8	52.3	 16
 53	 23	356.5	50.4	 16
 54	 23	205.5	25.5	 16
 55	 23	230.8	36.3	 16
 56	 23	92.3	15.9	 16
 57	 23	122.8	20.0	 16
 58	 23	93.0	15.7	 16
 59	 23	83.0	14.5	 16
 60	 23	95.5	15.8	 16
 61	 23	119.0	19.6	 16
 62	 23	118.5	17.6	 16
 63	 23	91.3	21.2	 16
 64	 23	354.0	63.0	 16
 65	 23	86.5	23.2	 16
 66	 23	70.8	12.4	 16
 67	 23	67.3	11.6	 16
 68	 23	67.0	14.0	 16
 69	 23	114.5	23.7	 16
 70	 23	176.5	30.3	 16
 71	 23	77.8	16.2	 16
 72	 23	91.0	19.4	 16
 73	 23	133.5	18.0	 16
 74	 23	221.0	652.7	 16
 75	 23	149.3	24.5	 16
 76	 23	145.0	22.0	 16
 77	 23	55.0	9.9	 16
 78	 23	82.8	29.9	 16
 79	 23	106.3	14.0	 16
 80	 23	88.8	22.2	 16
 81	 23	61.3	9.9	 16
 82	 23	100.0	28.3	 16
 83	 23	72.5	10.9	 16
 84	 23	81.3	18.2	 16
 85	 23	95.8	18.2	 16
 86	 23	68.5	14.6	 16
 87	 23	177.3	18.2	 16
 88	 23	175.3	25.9	 16
 89	 23	86.0	14.7	 16
 90	 23	69.3	10.1	 16
 91	 23	160.8	27.2	 16
 92	 23	184.5	24.1	 16
 93	 23	347.5	36.7	 16
 94	 23	157.8	27.1	 16
 95	 23	88.0	17.7	 16
 96	 23	83.3	15.3	 16
 97	 23	94.3	16.7	 16
 98	 23	101.0	20.8	 16
 99	 23	119.0	18.1	 20
100	 23	104.5	29.1	 16
101	 23	122.5	17.0	 16
102	 23	160.8	24.2	 16
103	 23	70.8	10.4	 16
104	 23	195.5	24.0	 16
105	 23	188.0	17.3	 16
106	 23	166.3	22.9	 16
107	 23	79.8	28.2	 16
108	 23	161.5	25.6	 16
109	 23	70.0	77.0	 16
110	 23	82.3	16.8	 16
111	 23	153.5	19.1	 16
112	 23	127.8	19.3	 16
113	 23	62.0	9.2	 16
114	 23	58.0	10.6	 16
115	 23	102.3	17.9	 16
116	 23	63.5	15.4	 16
117	 23	102.5	19.0	 16
118	 23	80.0	13.3	 16
119	 23	62.8	9.0	 16
120	 23	84.5	13.5	 16
121	 23	144.5	21.9	 16
122	 23	89.5	17.3	 16
123	 23	206.8	37.3	 16
124	 23	86.0	18.6	 16
125	 23	86.5	12.7	 16
126	 23	83.3	15.2	 16
127	 23	106.5	13.4	 16
128	 23	111.8	20.6	 16
129	 23	140.5	25.8	 16
130	 23	129.8	34.0	 16
131	 23	100.3	11.8	 16
132	 23	264.0	44.1	 16
133	 23	498.8	68.5	 16
134	 23	259.0	40.1	 16
135	 23	122.0	18.3	 16
136	 23	632.0	49.8	 16
137	 23	123.5	36.7	 16
138	 23	163.5	20.4	 16
139	 23	110.3	11.7	 16
140	 23	62.5	11.8	 16
141	 23	65.8	10.8	 16
142	 23	65.0	10.9	 16
143	 23	71.3	16.5	 16
144	 23	154.8	729.8	 16
145	 23	125.5	18.6	 16
146	 23	242.0	33.1	 16
147	 23	82.3	16.3	 16
148	 23	69.5	15.3	 16
149	 23	88.3	12.3	 16
150	 23	63.3	8.8	 16
151	 23	85.3	18.5	 16
152	 23	85.3	18.8	 16
153	 23	95.8	23.3	 16
154	 23	74.5	18.2	 16
155	 23	110.0	15.6	 16
156	 23	180.3	22.3	 16
157	 23	91.8	14.6	 16
158	 23	213.5	23.9	 16
159	 23	115.0	16.0	 16
160	 23	675.8	78.3	 16
161	 23	601.5	70.4	 16
162	 23	66.3	10.5	 16
163	 23	94.5	50.5	 16
164	 23	165.3	20.1	 16
165	 23	69.0	18.3	 16
166	 23	62.0	8.2	 16
167	 23	100.8	16.9	 16
168	 23	150.3	561.6	 16
169	 23	143.8	23.0	 16
170	 23	155.0	22.9	 16
171	 23	61.8	10.8	 16
172	 23	216.5	129.8	 16
173	 23	119.0	19.9	 16
174	 23	169.3	28.0	 16
175	 23	71.5	15.8	 16
176	 23	88.0	16.1	 16
177	 23	100.8	27.0	 16
178	 23	120.8	18.3	 16
179	 23	118.3	24.0	 16
180	 23	125.0	16.0	 16
181	 23	119.3	20.7	 16
182	 23	143.0	24.2	 16
183	 23	81.5	14.1	 16
184	 23	141.0	24.6	 16
185	 23	68.8	15.0	 16
186	 23	61.3	10.1	 16
187	 23	86.8	15.0	 16
188	 23	185.8	80.5	 16
189	 23	125.3	14.1	 16
190	 23	93.3	17.2	 16
191	 23	80.5	9.7	 16
192	 23	98.3	14.9	 16
193	 23	96.5	18.2	 16
194	 23	85.5	17.7	 16
195	 23	74.8	10.8	 16
196	 23	236.0	34.4	 16
197	 23	74.3	16.4	 16
198	 23	71.5	14.0	 16
199	 23	67.3	9.4	 16
200	 23	140.8	24.3	 16
201	 23	66.0	13.8	 16
202	 23	72.0	19.4	 16
203	 23	214.5	27.4	 16
204	 23	88.3	12.9	 16
205	 23	76.3	13.0	 16
206	 23	102.8	17.7	 16
207	 23	63.3	11.5	 16
208	 23	67.3	14.4	 16
209	 23	111.0	14.6	 16
210	 23	182.8	20.8	 16
211	 23	382.8	43.2	 16
212	 23	90.3	13.6	 16
213	 23	419.8	61.8	 16
214	 23	67.3	14.9	 16
215	 23	293.8	51.5	 16
216	 23	89.3	11.1	 16
217	 23	87.5	19.0	 16
218	 23	64.0	14.1	 16
219	 23	528.3	64.3	 16
220	 23	73.3	10.4	 16
221	 23	113.0	18.3	 16
222	 23	84.3	14.5	 16
223	 23	61.0	17.9	 16
224	 23	200.3	36.7	 16
225	 23	104.8	20.6	 16
226	 23	82.8	11.8	 16
227	 23	135.5	45.3	 16
228	 23	107.3	18.0	 16
229	 23	95.5	17.4	 16
230	 23	131.3	22.2	 16
231	 23	205.3	43.8	 16
232	 23	285.5	48.0	 16
233	 23	168.0	28.6	 16
234	 23	68.5	13.2	 16
235	 23	252.5	35.9	 16
236	 23	92.3	28.0	 16
237	 23	67.5	17.2	 16
238	 23	65.3	11.3	 16
239	 23	237.5	35.3	 16
240	 23	85.3	16.8	 16
241	 23	162.0	25.5	 20
242	 23	64.3	14.6	 16
243	 23	86.3	11.9	 16
244	 23	96.8	18.3	 16
245	 23	109.0	25.9	 16
246	 23	80.0	12.7	 16
247	 23	59.5	10.8	 16
248	 23	97.3	16.2	 16
249	 23	115.3	19.9	 16
250	 23	99.8	22.9	 16
251	 23	63.8	12.8	 16
252	 23	112.0	21.1	 16
253	 23	94.3	62.8	 16
254	 23	60.5	10.7	 16
255	 23	54.8	8.7	 16
256	 23	206.0	30.6	 16
257	 23	96.8	16.6	 16
258	 23	183.3	37.2	 16
259	 23	134.8	15.1	 16
260	 23	794.0	76.9	 16
261	 23	806.5	83.5	 16
262	 23	751.3	131.5	 16
263	 23	69.3	12.4	 16
264	 23	102.3	60.9	 16
265	 23	62.8	10.8	 16
266	 23	149.0	25.3	 16
267	 23	94.0	13.3	 16
268	 23	107.3	14.2	 16
269	 23	130.8	12.7	 16
270	 23	169.8	52.9	 16
271	 23	85.0	19.0	 16
272	 23	226.3	31.8	 16
273	 23	3082.5	477.2	 16
274	 23	69.0	12.2	 16
275	 23	90.5	16.9	 16
276	 23	165.8	21.0	 16
277	 23	72.5	15.0	 16
278	 23	175.8	26.7	 16
279	 23	287.8	39.6	 16
280	 23	118.0	20.4	 16
281	 23	80.5	45.1	 16
282	 23	98.0	15.9	 16
283	 23	189.8	30.0	 16
284	 23	56.0	10.3	 16
285	 23	64.0	11.4	 16
286	 23	83.3	17.2	 16
287	 23	85.8	18.9	 16
288	 23	65.5	10.0	 16
289	 23	307.3	40.4	 16
290	 23	265.5	28.4	 16
291	 23	192.5	27.1	 16
292	 23	131.5	18.6	 16
293	 23	137.5	23.1	 16
294	 23	132.5	21.9	 16
295	 23	91.0	13.5	 16
296	 23	63.8	13.5	 16
297	 23	62.8	11.3	 16
298	 23	153.5	20.4	 16
299	 23	531.3	84.7	 16
300	 23	91.8	15.0	 16
301	 23	73.5	10.0	 16
302	 23	1232.0	131.4	 16
303	 23	90.3	17.0	 16
304	 23	152.3	18.7	 16
305	 23	165.3	21.2	 16
306	 23	227.0	37.3	 16
307	 23	223.8	41.1	 16
308	 23	86.3	17.5	 16
309	 23	81.3	21.4	 16
310	 23	101.0	16.3	 16
311	 23	133.5	25.7	 16
312	 23	149.5	23.8	 16
313	 23	85.0	20.7	 16
314	 23	115.3	23.9	 16
315	 23	55.8	12.6	 16
316	 23	93.0	18.9	 16
317	 23	87.8	16.0	 16
318	 23	76.8	17.7	 16
319	 23	82.3	14.0	 16
320	 23	104.0	18.9	 16
321	 23	69.8	10.3	 16
322	 23	131.3	19.8	 16
323	 23	72.3	12.5	 16
324	 23	204.3	27.4	 16
325	 23	347.8	42.2	 16
326	 23	108.8	21.3	 16
327	 23	69.0	13.8	 16
328	 23	189.8	39.9	 16
329	 23	70.8	12.2	 16
330	 23	125.0	25.3	 16
331	 23	77.0	15.4	 16
332	 23	90.5	19.4	 16
333	 23	162.0	145.7	 16
334	 23	55.3	13.8	 16
335	 23	77.0	13.4	 16
336	 23	76.3	15.6	 16
337	 23	84.0	16.8	 16
338	 23	107.8	18.5	 16
339	 23	60.0	10.0	 16
340	 23	79.3	15.1	 16
341	 23	95.0	15.5	 16
342	 23	138.3	26.9	 16
343	 23	128.3	21.0	 16
344	 23	132.8	26.0	 16
345	 23	245.3	32.9	 16
346	 23	114.5	15.9	 16
347	 23	92.5	21.3	 16
348	 23	93.0	13.1	 16
349	 23	88.5	11.3	 16
350	 23	93.3	17.5	 16
351	 23	60.3	12.5	 16
352	 23	166.5	19.1	 16
353	 23	78.0	16.3	 16
354	 23	182.0	26.8	 16
355	 23	68.3	12.3	 16
356	 23	204.0	27.1	 16
357	 23	109.0	18.0	 16
358	 23	455.5	57.8	 16
359	 23	264.3	25.1	 16
360	 23	167.3	26.7	 16
361	 23	323.0	48.9	 16
362	 23	504.3	90.6	 16
363	 23	138.0	24.2	 16
364	 23	112.3	20.3	 16
365	 23	141.0	24.6	 16
366	 23	60.5	15.8	 16
367	 23	55.8	8.7	 16
368	 23	68.3	11.3	 16
369	 23	53.3	7.7	 16
370	 23	73.5	13.3	 16
371	 23	67.3	16.6	 16
372	 23	175.5	25.2	 16
373	 23	153.5	30.5	 16
374	 23	61.3	9.4	 16
375	 23	66.0	16.7	 16
376	 23	67.5	13.8	 16
377	 23	143.3	23.8	 16
378	 23	126.8	17.3	 16
379	 23	210.0	34.5	 16
380	 23	121.5	14.7	 16
381	 23	1283.5	233.1	 16
382	 23	155.5	20.7	 16
383	 23	62.5	9.0	 16
384	 23	76.3	15.5	 20
385	 23	98.0	20.4	 16
386	 23	91.0	22.4	 16
387	 23	86.0	11.3	 16
388	 23	64.3	10.9	 16
389	 23	74.0	11.6	 16
390	 23	101.8	22.0	 16
391	 23	430.0	68.5	 16
392	 23	54.3	12.5	 16
393	 23	120.0	59.8	 16
394	 23	98.8	15.4	 16
395	 23	70.3	10.9	 16
396	 23	83.5	11.1	 16
397	 23	221.8	40.7	 16
398	 23	105.0	16.5	 16
399	 23	104.3	18.8	 16
400	 23	146.8	28.6	 16
401	 23	85.0	10.4	 16
402	 23	471.3	64.4	 16
403	 23	2794.5	291.8	 16
404	 23	93.3	18.4	 16
405	 23	675.3	93.5	 16
406	 23	61.8	8.7	 16
407	 23	74.3	11.1	 16
408	 23	127.8	21.3	 16
409	 23	83.0	16.2	 16
410	 23	99.0	15.3	 16
411	 23	104.0	21.8	 16
412	 23	162.0	27.9	 16
413	 23	135.5	25.8	 16
414	 23	54.8	10.7	 16
415	 23	75.0	18.8	 16
416	 23	86.3	13.5	 16
417	 23	97.3	9.7	 16
418	 23	171.5	24.9	 16
419	 23	135.0	29.9	 16
420	 23	68.8	13.8	 16
421	 23	60.8	16.8	 16
422	 23	221.8	35.4	 16
423	 23	76.5	18.6	 16
424	 23	72.3	15.6	 16
425	 23	76.0	14.2	 16
426	 23	838.5	80.7	 16
427	 23	189.8	81.0	 16
428	 23	257.0	34.2	 16
429	 23	1888.8	149.5	 16
430	 23	1033.8	159.5	 16
431	 23	85.0	10.6	 16
432	 23	94.5	18.4	 16
433	 23	72.5	20.5	 16
434	 23	147.3	19.8	 16
435	 23	222.8	24.2	 16
436	 23	175.8	28.7	 16
437	 23	178.5	29.4	 16
438	 23	111.5	15.7	 16
439	 23	263.0	29.5	 16
440	 23	92.3	15.5	 16
441	 23	137.8	21.6	 16
442	 23	115.3	15.2	 16
443	 23	90.3	15.5	 16
444	 23	105.0	16.1	 16
445	 23	214.3	27.7	 16
446	 23	223.8	25.7	 16
447	 23	575.3	58.7	 16
448	 23	216.3	27.4	 16
449	 23	92.5	16.7	 16
450	 23	173.5	20.3	 16
451	 23	122.5	18.2	 16
452	 23	156.5	25.8	 16
453	 23	108.0	12.9	 16
454	 23	222.3	42.1	 16
455	 23	292.3	42.5	 16
456	 23	105.5	13.9	 16
457	 23	96.5	15.3	 16
458	 23	184.0	28.8	 16
459	 23	177.5	22.7	 16
460	 23	96.8	17.5	 16
461	 23	371.0	59.9	 16
462	 23	146.5	26.9	 16
463	 23	105.3	17.1	 16
464	 23	125.0	21.3	 16
465	 23	57.0	10.6	 16
466	 23	56.5	12.3	 16
467	 23	54.5	10.1	 16
468	 23	119.3	16.8	 16
469	 23	120.8	19.8	 16
470	 23	75.5	11.8	 16
471	 23	81.5	57.7	 16
472	 23	270.5	46.2	 16
473	 23	133.3	22.1	 16
474	 23	159.0	20.7	 16
475	 23	170.5	20.5	 16
476	 23	161.5	63.2	 16
477	 23	126.8	14.3	 16
478	 23	113.0	17.4	 16
479	 23	279.0	31.7	 16
480	 23	83.3	15.0	 16
481	 23	68.3	15.0	 16
482	 23	72.5	12.2	 16
483	 23	73.3	12.0	 16
484	 23	294.0	32.8	 16
485	 23	167.5	25.0	 16
486	 23	162.5	36.7	 16
487	 23	117.0	27.9	 16
488	 23	88.8	15.7	 16
489	 23	261.0	47.2	 16
490	 23	76.0	11.0	 16
491	 23	57.5	11.1	 16
492	 23	98.8	19.7	 16
493	 23	539.8	53.7	 16
494	 23	120.3	21.4	 16
495	 23	107.3	17.1	 16
496	 23	71.3	8.1	 16
497	 23	357.3	71.3	 16
498	 23	87.8	41.3	 16
499	 23	139.3	22.5	 16
500	 23	65.5	9.7	 16
501	 23	75.0	10.9	 16
502	 23	84.5	16.2	 16
503	 23	65.5	8.0	 16
504	 23	172.5	19.0	 16
505	 23	303.3	35.6	 16
506	 23	79.3	15.3	 16
507	 23	84.3	18.2	 16
508	 23	56.0	10.4	 16
509	 23	120.5	18.2	 16
510	 23	133.5	62.5	 16
511	 23	243.3	44.2	 16
512	 23	73.0	13.0	 16
513	 23	90.0	16.9	 16
514	 23	47.8	8.9	 16
515	 23	62.8	15.7	 16
516	 23	97.5	19.7	 16
517	 23	77.3	14.4	 16
518	 23	101.5	18.0	 16
519	 23	95.3	13.4	 16
520	 23	110.3	19.7	 16
521	 23	761.3	98.5	 16
522	 23	577.5	102.9	 16
523	 23	165.5	30.9	 16
524	 23	219.5	28.2	 16
525	 23	72.5	10.9	 16
526	 23	83.5	15.4	 20
527	 23	175.8	29.1	 16
528	 23	185.3	26.9	 16
529	 23	203.5	23.0	 16
530	 23	207.8	28.0	 16
531	 23	104.5	14.4	 16
532	 23	5448.0	699.3	 16
533	 23	108.0	15.6	 16
534	 23	133.0	17.5	 16
535	 23	171.3	34.4	 16
536	 23	72.8	20.1	 16
537	 23	165.0	21.2	 16
538	 23	80.3	17.3	 16
539	 23	70.3	9.7	 16
540	 23	146.3	21.0	 16
541	 23	78.3	16.9	 16
542	 23	77.0	13.7	 16
543	 23	1542.3	302.7	 16
544	 23	117.5	18.6	 16
545	 23	73.0	11.9	 16
546	 23	86.0	20.6	 16
547	 23	124.8	18.5	 16
548	 23	73.5	12.8	 16
549	 23	293.3	38.5	 16
550	 23	105.3	21.7	 16
551	 23	246.5	33.3	 16
552	 23	87.0	18.0	 16
553	 23	167.5	16.5	 16
554	 23	114.0	106.1	 16
555	 23	101.5	18.9	 16
556	 23	213.0	35.2	 16
557	 23	132.8	18.0	 16
558	 23	117.0	14.4	 16
559	 23	74.3	12.4	 16
560	 23	72.3	15.0	 16
561	 23	2953.5	439.0	 16
562	 23	82.5	12.1	 16
563	 23	162.0	24.5	 16
564	 23	150.3	16.0	 16
565	 23	107.0	19.8	 16
566	 23	309.3	44.0	 16
567	 23	426.0	65.6	 16
568	 23	331.3	51.0	 16
569	 23	98.3	18.7	 16
570	 23	94.5	19.6	 16
571	 23	67.3	14.2	 16
572	 23	118.0	8.4	 16
573	 23	916.8	142.9	 16
574	 23	231.3	42.2	 16
575	 23	549.0	49.1	 16
576	 23	87.3	17.2	 16
577	 23	70.3	13.5	 16
578	 23	485.3	85.9	 16
579	 23	100.3	15.4	 16
580	 23	67.8	11.1	 16
581	 23	230.5	41.4	 16
582	 23	199.5	44.1	 16
583	 23	74.0	11.8	 16
584	 23	85.0	12.9	 16
585	 23	67.3	15.2	 16
586	 23	510.3	103.8	 16
587	 23	512.0	111.0	 16
588	 23	87.3	16.6	 16
589	 23	435.3	106.4	 16
590	 23	205.3	30.5	 16
591	 23	107.3	26.4	 16
592	 23	198.5	29.9	 16
593	 23	181.3	30.7	 16
594	 23	301.0	63.7	 16
595	 23	74.3	12.5	 16
596	 23	80.3	15.4	 16
597	 23	54.0	9.2	 16
598	 23	112.8	29.5	 16
599	 23	266.3	36.5	 16
600	 23	138.0	24.3	 16
601	 23	73.5	11.8	 16
602	 23	92.8	12.3	 16
603	 23	947.8	158.8	 16
604	 23	80.0	12.5	 16
605	 23	267.0	63.8	 16
606	 23	99.0	20.0	 16
607	 23	190.8	30.1	 16
608	 23	408.5	68.9	 16
609	 23	127.0	15.1	 16
610	 23	129.0	20.5	 16
611	 23	250.0	44.1	 16
612	 23	427.3	52.2	 16
613	 23	167.0	29.5	 16
614	 23	694.0	107.7	 16
615	 23	167.3	22.3	 16
616	 23	248.0	33.3	 16
617	 23	75.8	15.6	 16
618	 23	230.0	31.8	 16
619	 23	140.8	25.9	 16
620	 23	122.3	16.2	 16
621	 23	89.3	12.7	 16
622	 23	136.8	22.8	 16
623	 23	277.5	37.4	 16
624	 23	118.5	15.4	 16
625	 23	136.0	16.6	 16
626	 23	134.3	13.7	 16
627	 23	118.3	29.2	 16
628	 23	153.8	30.3	 16
629	 23	89.0	15.9	 16
630	 23	82.3	10.3	 16
631	 23	197.5	30.7	 16
632	 23	120.3	20.6	 16
633	 23	158.5	16.6	 16
634	 23	885.3	180.5	 16
635	 23	275.5	53.8	 16
636	 23	300.0	58.2	 16
637	 23	350.8	63.6	 16
638	 23	139.5	25.5	 16
639	 23	139.3	20.8	 16
640	 23	357.8	62.9	 16
641	 23	76.3	15.7	 16
642	 23	95.5	18.2	 16
643	 23	101.3	15.2	 16
644	 23	329.0	69.9	 16
645	 23	108.0	20.1	 16
646	 23	172.5	28.9	 16
647	 23	106.3	19.4	 16
648	 23	196.3	32.7	 16
649	 23	181.3	25.2	 16
650	 23	160.0	21.1	 16
651	 23	123.0	20.1	 16
652	 23	77.0	13.3	 16
653	 23	75.5	12.9	 16
654	 23	79.3	9.9	 16
655	 23	112.5	22.5	 16
656	 23	120.8	16.7	 16
657	 23	122.0	21.7	 16
658	 23	148.8	24.7	 16
659	 23	143.3	19.9	 16
660	 23	173.3	22.7	 16
661	 23	62.0	10.5	 16
662	 23	223.3	40.8	 16
663	 23	181.3	29.7	 16
664	 23	185.5	28.6	 16
665	 23	119.3	27.6	 16
666	 23	88.5	16.3	 16
667	 23	102.8	12.8	 16
668	 23	70.5	16.1	 20
669	 23	87.5	11.7	 16
670	 23	79.0	18.3	 16
671	 23	173.0	18.4	 16
672	 23	96.0	17.4	 16
673	 23	73.5	14.7	 16
674	 23	83.8	20.5	 16
675	 23	105.8	17.3	 16
676	 23	184.3	34.4	 16
677	 23	174.8	28.7	 16
678	 23	100.5	43.5	 16
679	 23	65.0	13.1	 16
680	 23	61.8	8.4	 16
681	 23	150.5	24.1	 16
682	 23	393.0	47.1	 16
683	 23	128.0	20.3	 16
684	 23	214.5	30.4	 16
685	 23	156.0	30.2	 16
686	 23	87.3	19.2	 16
687	 23	122.3	21.3	 16
688	 23	342.8	33.0	 16
689	 23	132.8	16.8	 16
690	 23	78.8	15.6	 16
691	 23	111.8	24.4	 16
692	 23	69.5	11.9	 16
693	 23	120.3	17.7	 16
694	 23	189.5	18.4	 16
695	 23	79.5	15.7	 16
696	 23	57.3	12.8	 16
697	 23	70.5	12.8	 16
698	 23	62.8	22.6	 16
699	 23	76.8	18.6	 16
700	 23	293.3	31.2	 16
701	 23	323.0	29.9	 16
702	 23	197.3	24.0	 16
703	 23	211.0	19.8	 16
704	 23	176.5	23.1	 16
705	 23	168.0	16.8	 16
706	 23	180.5	31.8	 16
707	 23	174.3	22.6	 16
708	 23	196.3	28.8	 16
709	 23	181.5	25.1	 16
710	 23	102.5	12.8	 16
711	 23	105.5	17.3	 16
  0	 24	8134.0	968.0	 16
  1	 24	96.3	20.6	 16
  2	 24	83.5	17.1	 16
  3	 24	78.3	19.4	 16
  4	 24	163.0	28.1	 16
  5	 24	60.3	10.7	 16
  6	 24	161.0	34.3	 16
  7	 24	194.8	28.6	 16
  8	 24	138.3	16.4	 16
  9	 24	61.3	27.5	 16
 10	 24	73.3	16.8	 16
 11	 24	220.5	23.7	 16
 12	 24	79.3	20.0	 16
 13	 24	377.8	42.9	 16
 14	 24	90.5	57.8	 16
 15	 24	216.5	38.7	 16
 16	 24	100.3	24.7	 16
 17	 24	81.3	14.5	 16
 18	 24	101.5	16.2	 16
 19	 24	123.5	14.1	 16
 20	 24	83.3	9.6	 16
 21	 24	72.5	15.8	 16
 22	 24	127.3	20.1	 16
 23	 24	148.3	22.1	 16
 24	 24	500.0	89.6	 16
 25	 24	357.3	64.5	 16
 26	 24	60.0	8.6	 16
 27	 24	83.3	14.1	 16
 28	 24	85.5	70.0	 16
 29	 24	108.5	17.9	 16
 30	 24	154.3	26.4	 16
 31	 24	329.8	33.9	 16
 32	 24	128.8	20.4	 16
 33	 24	137.3	23.4	 16
 34	 24	67.0	12.5	 16
 35	 24	71.5	13.1	 16
 36	 24	167.0	21.7	 16
 37	 24	67.3	10.8	 16
 38	 24	63.5	11.9	 16
 39	 24	82.3	11.4	 16
 40	 24	57.8	9.4	 16
 41	 24	67.8	14.0	 16
 42	 24	71.5	15.5	 16
 43	 24	55.3	9.7	 16
 44	 24	117.3	16.5	 16
 45	 24	365.3	50.5	 16
 46	 24	108.3	13.4	 16
 47	 24	94.5	20.1	 16
 48	 24	104.0	17.1	 16
 49	 24	97.0	19.4	 16
 50	 24	68.8	10.7	 16
 51	 24	109.0	23.7	 16
 52	 24	454.5	49.3	 16
 53	 24	345.0	35.1	 16
 54	 24	255.8	29.5	 16
 55	 24	321.8	44.8	 16
 56	 24	71.3	13.2	 16
 57	 24	93.5	16.3	 16
 58	 24	71.5	8.5	 16
 59	 24	91.0	17.1	 16
 60	 24	67.0	11.1	 16
 61	 24	87.0	12.2	 16
 62	 24	86.0	14.9	 16
 63	 24	93.5	15.8	 16
 64	 24	135.0	19.0	 16
 65	 24	89.5	20.6	 16
 66	 24	79.0	17.1	 16
 67	 24	77.0	15.0	 16
 68	 24	70.8	17.6	 16
 69	 24	103.3	13.8	 16
 70	 24	190.3	41.2	 16
 71	 24	84.0	24.3	 16
 72	 24	74.5	11.6	 16
 73	 24	156.5	20.8	 16
 74	 24	106.3	18.9	 16
 75	 24	87.0	17.0	 16
 76	 24	154.3	23.1	 16
 77	 24	51.0	11.6	 16
 78	 24	70.0	29.1	 16
 79	 24	75.3	15.5	 16
 80	 24	82.3	63.2	 16
 81	 24	66.3	14.7	 16
 82	 24	114.8	19.8	 16
 83	 24	68.3	11.5	 16
 84	 24	62.5	11.4	 16
 85	 24	76.3	13.1	 16
 86	 24	55.3	6.8	 16
 87	 24	96.3	21.8	 16
 88	 24	106.3	14.4	 16
 89	 24	84.8	15.2	 16
 90	 24	71.3	12.8	 16
 91	 24	104.3	14.7	 16
 92	 24	98.3	18.9	 16
 93	 24	109.5	20.7	 16
 94	 24	170.3	28.9	 16
 95	 24	99.3	16.9	 16
 96	 24	105.3	20.4	 16
 97	 24	94.8	116.1	 16
 98	 24	110.3	19.4	 16
 99	 24	92.3	13.3	 16
100	 24	83.0	9.4	 20
101	 24	123.0	27.7	 16
102	 24	152.0	27.7	 16
103	 24	74.8	11.7	 16
104	 24	157.3	23.6	 16
105	 24	152.3	15.2	 16
106	 24	92.3	15.2	 16
107	 24	68.0	12.1	 16
108	 24	78.0	18.8	 16
109	 24	64.0	11.7	 16
110	 24	77.5	16.5	 16
111	 24	79.8	18.9	 16
112	 24	118.5	21.8	 16
113	 24	60.0	10.4	 16
114	 24	61.8	10.7	 16
115	 24	67.0	14.7	 16
116	 24	62.3	10.6	 16
117	 24	82.0	13.5	 16
118	 24	65.3	17.8	 16
119	 24	55.3	10.6	 16
120	 24	78.0	15.9	 16
121	 24	76.3	12.6	 16
122	 24	67.8	12.1	 16
123	 24	92.3	19.6	 16
124	 24	69.0	9.5	 16
125	 24	61.3	10.4	 16
126	 24	83.3	13.2	 16
127	 24	112.3	23.6	 16
128	 24	116.0	15.8	 16
129	 24	93.3	14.2	 16
130	 24	121.8	18.0	 16
131	 24	87.8	20.3	 16
132	 24	119.5	16.6	 16
133	 24	248.3	23.8	 16
134	 24	285.8	32.1	 16
135	 24	131.8	30.9	 16
136	 24	315.0	27.0	 16
137	 24	121.3	20.8	 16
138	 24	116.3	21.7	 16
139	 24	86.5	13.0	 16
140	 24	57.0	9.6	 16
141	 24	66.5	11.5	 16
142	 24	58.0	7.6	 16
143	 24	90.3	103.6	 16
144	 24	86.3	19.7	 16
145	 24	102.5	18.0	 16
146	 24	142.5	28.0	 16
147	 24	66.0	12.2	 16
148	 24	67.0	13.2	 16
149	 24	56.5	9.7	 16
150	 24	61.8	13.7	 16
151	 24	71.5	11.5	 16
152	 24	67.0	12.2	 16
153	 24	70.8	14.1	 16
154	 24	65.8	12.4	 16
155	 24	85.0	11.1	 16
156	 24	81.8	17.0	 16
157	 24	138.0	26.7	 16
158	 24	151.5	90.0	 16
159	 24	72.5	13.8	 16
160	 24	311.5	50.5	 16
161	 24	249.3	32.2	 16
162	 24	130.3	109.8	 16
163	 24	60.5	10.4	 16
164	 24	84.5	17.2	 16
165	 24	64.5	16.2	 16
166	 24	71.0	15.0	 16
167	 24	87.5	12.7	 16
168	 24	67.0	11.9	 16
169	 24	74.3	19.1	 16
170	 24	93.0	16.3	 16
171	 24	64.0	7.2	 16
172	 24	83.8	12.2	 16
173	 24	629.8	48.2	 16
174	 24	101.0	64.1	 16
175	 24	53.3	9.0	 16
176	 24	62.3	28.0	 16
177	 24	78.0	19.6	 16
178	 24	61.3	11.2	 16
179	 24	63.0	10.8	 16
180	 24	250.5	39.8	 16
181	 24	157.3	31.8	 16
182	 24	82.3	18.1	 16
183	 24	93.0	16.3	 16
184	 24	121.3	17.8	 16
185	 24	57.8	9.3	 16
186	 24	58.8	11.4	 16
187	 24	69.5	16.9	 16
188	 24	223.8	36.2	 16
189	 24	252.3	16.7	 16
190	 24	119.8	22.1	 16
191	 24	151.5	43.0	 16
192	 24	111.8	16.7	 16
193	 24	110.0	17.5	 16
194	 24	108.0	17.3	 16
195	 24	66.3	12.4	 16
196	 24	129.5	16.8	 16
197	 24	86.3	10.0	 16
198	 24	105.8	64.4	 16
199	 24	70.5	64.2	 16
200	 24	134.8	21.3	 16
201	 24	63.8	10.3	 16
202	 24	75.5	15.6	 16
203	 24	92.5	17.8	 16
204	 24	67.3	10.4	 16
205	 24	64.0	12.2	 16
206	 24	76.8	19.7	 16
207	 24	63.5	11.5	 16
208	 24	61.3	14.3	 16
209	 24	104.0	18.7	 16
210	 24	74.0	14.2	 16
211	 24	83.0	15.0	 16
212	 24	83.8	24.7	 16
213	 24	148.0	23.2	 16
214	 24	76.8	17.0	 16
215	 24	131.5	49.1	 16
216	 24	66.5	14.4	 16
217	 24	68.5	11.2	 16
218	 24	68.5	13.7	 16
219	 24	178.8	28.4	 16
220	 24	97.0	26.3	 16
221	 24	133.8	22.9	 16
222	 24	63.0	9.0	 16
223	 24	60.0	9.1	 16
224	 24	75.5	148.6	 16
225	 24	116.0	19.4	 16
226	 24	70.8	14.2	 16
227	 24	90.8	44.9	 16
228	 24	85.3	15.4	 16
229	 24	86.5	20.3	 16
230	 24	122.3	15.4	 16
231	 24	133.5	23.4	 16
232	 24	509.0	41.7	 16
233	 24	192.3	26.2	 16
234	 24	74.5	18.2	 16
235	 24	119.0	18.4	 16
236	 24	81.8	20.9	 16
237	 24	51.0	9.1	 16
238	 24	56.3	12.1	 16
239	 24	629.5	86.7	 16
240	 24	112.5	16.3	 16
241	 24	136.5	18.7	 16
242	 24	65.8	11.4	 20
243	 24	68.5	9.6	 16
244	 24	67.0	10.7	 16
245	 24	82.5	15.3	 16
246	 24	90.5	17.4	 16
247	 24	57.5	10.9	 16
248	 24	85.8	18.4	 16
249	 24	117.8	15.4	 16
250	 24	87.5	13.7	 16
251	 24	62.0	12.9	 16
252	 24	134.5	88.6	 16
253	 24	65.3	26.6	 16
254	 24	61.3	16.8	 16
255	 24	62.8	9.8	 16
256	 24	218.5	37.4	 16
257	 24	135.3	16.8	 16
258	 24	181.5	25.4	 16
259	 24	95.3	13.3	 16
260	 24	256.3	44.7	 16
261	 24	276.0	44.6	 16
262	 24	240.8	35.9	 16
263	 24	64.3	12.5	 16
264	 24	71.8	10.6	 16
265	 24	52.5	8.8	 16
266	 24	78.3	12.7	 16
267	 24	97.3	14.6	 16
268	 24	250.3	276.1	 16
269	 24	115.5	13.9	 16
270	 24	103.0	19.9	 16
271	 24	74.8	12.0	 16
272	 24	89.0	17.8	 16
273	 24	542.8	84.5	 16
274	 24	64.8	13.5	 16
275	 24	86.3	17.0	 16
276	 24	149.8	17.9	 16
277	 24	62.3	10.4	 16
278	 24	117.3	15.9	 16
279	 24	116.8	13.9	 16
280	 24	99.0	21.9	 16
281	 24	90.3	16.1	 16
282	 24	156.3	26.9	 16
283	 24	185.0	24.8	 16
284	 24	55.0	10.5	 16
285	 24	56.0	7.9	 16
286	 24	56.5	9.4	 16
287	 24	92.8	26.2	 16
288	 24	61.5	10.4	 16
289	 24	413.8	45.4	 16
290	 24	112.8	30.6	 16
291	 24	212.3	36.4	 16
292	 24	207.5	31.8	 16
293	 24	84.5	11.0	 16
294	 24	129.0	25.6	 16
295	 24	90.5	23.2	 16
296	 24	63.3	13.0	 16
297	 24	71.0	18.3	 16
298	 24	86.8	11.3	 16
299	 24	130.3	20.1	 16
300	 24	70.0	9.4	 16
301	 24	66.3	13.0	 16
302	 24	107.3	15.0	 16
303	 24	112.8	21.4	 16
304	 24	120.8	19.6	 16
305	 24	151.5	19.2	 16
306	 24	112.3	19.8	 16
307	 24	120.5	22.7	 16
308	 24	63.3	14.8	 16
309	 24	69.3	11.0	 16
310	 24	115.5	20.3	 16
311	 24	111.8	19.8	 16
312	 24	84.5	16.3	 16
313	 24	108.3	20.9	 16
314	 24	80.5	10.8	 16
315	 24	80.0	16.6	 16
316	 24	89.8	16.3	 16
317	 24	65.5	10.2	 16
318	 24	70.0	11.1	 16
319	 24	70.0	14.4	 16
320	 24	147.5	20.7	 16
321	 24	85.3	18.9	 16
322	 24	91.0	104.1	 16
323	 24	78.3	10.8	 16
324	 24	85.5	20.5	 16
325	 24	129.3	16.7	 16
326	 24	198.3	31.5	 16
327	 24	74.3	11.5	 16
328	 24	203.3	35.5	 16
329	 24	61.8	9.9	 16
330	 24	95.5	20.7	 16
331	 24	72.3	20.2	 16
332	 24	84.0	16.1	 16
333	 24	56.3	10.3	 16
334	 24	59.8	17.1	 16
335	 24	80.0	15.9	 16
336	 24	70.3	11.7	 16
337	 24	72.3	12.8	 16
338	 24	87.5	17.5	 16
339	 24	63.3	9.7	 16
340	 24	95.3	13.7	 16
341	 24	94.5	15.9	 16
342	 24	119.5	49.9	 16
343	 24	179.8	17.5	 16
344	 24	125.3	15.4	 16
345	 24	276.0	24.8	 16
346	 24	161.3	23.2	 16
347	 24	97.3	18.0	 16
348	 24	109.0	16.9	 16
349	 24	114.3	21.2	 16
350	 24	83.0	17.1	 16
351	 24	62.5	11.0	 16
352	 24	63.3	11.6	 16
353	 24	71.3	14.1	 16
354	 24	80.8	11.5	 16
355	 24	67.0	10.5	 16
356	 24	256.3	25.6	 16
357	 24	101.0	17.0	 16
358	 24	167.3	20.6	 16
359	 24	231.0	37.0	 16
360	 24	111.3	21.3	 16
361	 24	356.8	28.2	 16
362	 24	228.3	35.5	 16
363	 24	81.3	13.8	 16
364	 24	115.5	104.1	 16
365	 24	103.0	13.0	 16
366	 24	60.5	8.7	 16
367	 24	56.3	7.0	 16
368	 24	61.0	26.3	 16
369	 24	69.5	13.5	 16
370	 24	83.0	12.5	 16
371	 24	62.3	12.3	 16
372	 24	125.3	26.1	 16
373	 24	88.0	11.9	 16
374	 24	55.3	10.9	 16
375	 24	69.3	16.7	 16
376	 24	72.8	15.6	 16
377	 24	112.8	18.3	 16
378	 24	185.0	16.1	 16
379	 24	268.8	43.4	 16
380	 24	96.8	18.5	 16
381	 24	249.8	58.0	 16
382	 24	112.8	17.3	 16
383	 24	118.0	135.6	 16
384	 24	74.0	12.1	 16
385	 24	69.0	14.7	 20
386	 24	67.0	10.5	 16
387	 24	120.5	14.4	 16
388	 24	57.0	11.4	 16
389	 24	70.3	11.3	 16
390	 24	120.3	42.1	 16
391	 24	98.3	21.4	 16
392	 24	69.3	7.9	 16
393	 24	56.3	10.3	 16
394	 24	112.0	91.2	 16
395	 24	66.5	14.7	 16
396	 24	73.3	11.2	 16
397	 24	92.8	23.0	 16
398	 24	79.3	14.0	 16
399	 24	85.5	15.1	 16
400	 24	98.5	22.3	 16
401	 24	71.3	12.2	 16
402	 24	103.5	17.0	 16
403	 24	981.0	130.1	 16
404	 24	82.5	11.1	 16
405	 24	209.8	39.6	 16
406	 24	54.3	9.9	 16
407	 24	59.8	12.8	 16
408	 24	261.0	50.0	 16
409	 24	156.3	15.4	 16
410	 24	130.3	19.6	 16
411	 24	79.5	12.1	 16
412	 24	76.3	16.7	 16
413	 24	82.0	11.2	 16
414	 24	57.5	9.5	 16
415	 24	69.3	10.2	 16
416	 24	81.3	16.6	 16
417	 24	106.5	17.2	 16
418	 24	119.5	21.1	 16
419	 24	158.8	22.7	 16
420	 24	66.0	10.7	 16
421	 24	54.0	7.0	 16
422	 24	225.3	30.7	 16
423	 24	67.3	13.9	 16
424	 24	63.8	11.3	 16
425	 24	76.3	14.8	 16
426	 24	252.5	43.8	 16
427	 24	72.3	12.4	 16
428	 24	178.5	25.5	 16
429	 24	357.5	50.3	 16
430	 24	177.3	36.9	 16
431	 24	82.3	12.6	 16
432	 24	76.8	14.4	 16
433	 24	71.8	9.7	 16
434	 24	116.3	12.6	 16
435	 24	205.8	30.0	 16
436	 24	102.0	16.2	 16
437	 24	78.0	17.2	 16
438	 24	100.0	16.1	 16
439	 24	232.8	30.3	 16
440	 24	87.8	15.5	 16
441	 24	118.0	25.2	 16
442	 24	114.0	15.9	 16
443	 24	91.0	15.9	 16
444	 24	97.3	17.4	 16
445	 24	143.0	19.4	 16
446	 24	164.3	17.7	 16
447	 24	462.5	44.6	 16
448	 24	178.0	24.2	 16
449	 24	122.3	16.2	 16
450	 24	149.0	17.8	 16
451	 24	103.0	15.0	 16
452	 24	83.0	11.9	 16
453	 24	99.5	24.3	 16
454	 24	101.3	15.2	 16
455	 24	152.0	24.0	 16
456	 24	71.0	16.5	 16
457	 24	61.0	12.2	 16
458	 24	85.3	18.7	 16
459	 24	68.0	15.6	 16
460	 24	68.3	15.2	 16
461	 24	129.5	17.0	 16
462	 24	254.3	35.2	 16
463	 24	94.5	13.1	 16
464	 24	113.5	20.0	 16
465	 24	52.3	7.7	 16
466	 24	61.3	11.9	 16
467	 24	59.0	10.4	 16
468	 24	84.3	13.1	 16
469	 24	125.8	14.6	 16
470	 24	99.0	18.4	 16
471	 24	61.8	12.5	 16
472	 24	116.5	25.7	 16
473	 24	95.8	12.6	 16
474	 24	164.5	30.2	 16
475	 24	140.8	20.9	 16
476	 24	128.0	20.0	 16
477	 24	66.5	13.4	 16
478	 24	59.0	12.3	 16
479	 24	251.0	40.4	 16
480	 24	109.0	11.0	 16
481	 24	87.8	15.2	 16
482	 24	64.0	12.9	 16
483	 24	61.3	10.3	 16
484	 24	143.3	20.1	 16
485	 24	123.3	12.3	 16
486	 24	101.8	21.2	 16
487	 24	84.0	12.7	 16
488	 24	74.3	17.3	 16
489	 24	82.0	13.3	 16
490	 24	73.8	10.1	 16
491	 24	72.5	14.0	 16
492	 24	72.0	15.4	 16
493	 24	334.0	33.6	 16
494	 24	157.3	31.4	 16
495	 24	98.3	18.8	 16
496	 24	70.0	13.9	 16
497	 24	128.5	19.8	 16
498	 24	78.8	17.7	 16
499	 24	91.3	12.9	 16
500	 24	64.0	11.4	 16
501	 24	77.0	17.3	 16
502	 24	58.8	11.0	 16
503	 24	67.5	11.1	 16
504	 24	118.8	15.7	 16
505	 24	180.3	27.9	 16
506	 24	106.8	24.5	 16
507	 24	78.5	11.4	 16
508	 24	67.3	19.1	 16
509	 24	130.3	23.0	 16
510	 24	124.0	19.3	 16
511	 24	79.0	15.2	 16
512	 24	67.0	11.4	 16
513	 24	70.3	17.7	 16
514	 24	56.3	10.1	 16
515	 24	63.5	12.7	 16
516	 24	74.5	12.8	 16
517	 24	80.8	25.9	 16
518	 24	127.0	21.9	 16
519	 24	107.8	19.6	 16
520	 24	161.0	16.9	 16
521	 24	1133.0	158.9	 16
522	 24	218.3	116.2	 16
523	 24	163.3	29.5	 16
524	 24	110.3	20.8	 16
525	 24	67.3	11.9	 16
526	 24	81.3	15.5	 16
527	 24	148.3	25.1	 20
528	 24	170.3	26.7	 16
529	 24	155.8	24.5	 16
530	 24	126.8	22.7	 16
531	 24	103.3	18.6	 16
532	 24	1073.0	183.9	 16
533	 24	72.8	14.4	 16
534	 24	74.5	15.6	 16
535	 24	72.8	12.0	 16
536	 24	59.5	12.9	 16
537	 24	87.3	16.5	 16
538	 24	74.0	16.2	 16
539	 24	72.8	12.7	 16
540	 24	71.8	29.7	 16
541	 24	71.0	10.5	 16
542	 24	69.0	18.2	 16
543	 24	435.0	52.7	 16
544	 24	157.3	24.0	 16
545	 24	79.0	12.8	 16
546	 24	102.5	14.7	 16
547	 24	87.5	15.3	 16
548	 24	96.5	74.0	 16
549	 24	221.5	21.6	 16
550	 24	124.0	57.0	 16
551	 24	131.5	13.8	 16
552	 24	89.8	11.6	 16
553	 24	158.0	17.6	 16
554	 24	76.3	10.5	 16
555	 24	83.3	13.9	 16
556	 24	87.3	11.6	 16
557	 24	71.0	12.7	 16
558	 24	122.0	17.4	 16
559	 24	75.8	15.1	 16
560	 24	67.8	10.5	 16
561	 24	717.8	160.1	 16
562	 24	83.3	15.9	 16
563	 24	173.0	21.8	 16
564	 24	145.3	21.6	 16
565	 24	71.5	11.8	 16
566	 24	64.0	17.1	 16
567	 24	97.8	19.5	 16
568	 24	82.0	12.4	 16
569	 24	151.3	27.6	 16
570	 24	143.0	21.6	 16
571	 24	57.8	10.4	 16
572	 24	101.0	13.3	 16
573	 24	209.3	42.3	 16
574	 24	107.3	9.9	 16
575	 24	289.3	31.8	 16
576	 24	64.0	10.5	 16
577	 24	66.5	10.2	 16
578	 24	181.5	40.7	 16
579	 24	106.0	118.2	 16
580	 24	69.0	14.3	 16
581	 24	94.5	25.9	 16
582	 24	79.8	20.6	 16
583	 24	57.5	11.2	 16
584	 24	67.0	11.0	 16
585	 24	60.5	10.3	 16
586	 24	124.5	15.0	 16
587	 24	130.8	22.1	 16
588	 24	82.0	15.0	 16
589	 24	129.3	18.6	 16
590	 24	82.5	13.0	 16
591	 24	93.3	23.9	 16
592	 24	94.3	22.1	 16
593	 24	80.3	12.5	 16
594	 24	116.0	19.6	 16
595	 24	60.0	6.8	 16
596	 24	61.8	13.2	 16
597	 24	65.8	13.2	 16
598	 24	124.3	19.8	 16
599	 24	223.0	32.1	 16
600	 24	114.0	21.1	 16
601	 24	63.3	12.2	 16
602	 24	156.5	116.5	 16
603	 24	139.3	22.7	 16
604	 24	73.3	12.6	 16
605	 24	1738.8	450.8	 16
606	 24	82.0	15.3	 16
607	 24	99.8	14.3	 16
608	 24	78.0	14.3	 16
609	 24	91.5	9.4	 16
610	 24	85.8	19.2	 16
611	 24	82.8	11.9	 16
612	 24	243.0	30.0	 16
613	 24	142.8	17.6	 16
614	 24	250.0	24.0	 16
615	 24	137.0	22.0	 16
616	 24	182.0	21.4	 16
617	 24	67.0	13.8	 16
618	 24	81.8	15.5	 16
619	 24	87.5	15.4	 16
620	 24	226.5	31.2	 16
621	 24	123.8	19.0	 16
622	 24	121.3	24.0	 16
623	 24	206.5	21.0	 16
624	 24	106.8	13.9	 16
625	 24	96.5	17.7	 16
626	 24	129.3	16.4	 16
627	 24	174.5	16.5	 16
628	 24	159.8	25.3	 16
629	 24	60.3	12.4	 16
630	 24	98.8	18.8	 16
631	 24	115.5	15.2	 16
632	 24	156.5	24.9	 16
633	 24	149.5	20.2	 16
634	 24	122.8	28.2	 16
635	 24	174.3	32.1	 16
636	 24	319.5	46.1	 16
637	 24	306.3	24.1	 16
638	 24	305.0	36.5	 16
[truncated: 11,053,547 more chars]
