# Supplementary material for: Identify potential drugs for cardiovascular diseases caused by stress-induced genes in vascular smooth muscle cells
Source: PeerJ. 2016 Sep 28;4:e2478. doi: 10.7717/peerj.2478 (PMC5045879; doi:10.7717/peerj.2478)
Supplement: Supplemental Information 3 [file peerj-04-2478-s003.cel]

[CEL]
Version=3

[HEADER]
Cols=712
Rows=712
TotalX=712
TotalY=712
OffsetX=0
OffsetY=0
GridCornerUL=229 233
GridCornerUR=4505 265
GridCornerLR=4483 4535
GridCornerLL=207 4503
Axis-invertX=0
AxisInvertY=0
swapXY=0
DatHeader=[2..46162]  CO RPT:CLS=4733 RWS=4733 XIN=3  YIN=3  VE=17        2.0 02/11/03 15:41:57       HG-U133A.1sq                  6
Algorithm=Percentile
AlgorithmParameters=Percentile:75;CellMargin:2;OutlierHigh:1.500;OutlierLow:1.004

[INTENSITY]
NumberCells=506944
CellHeader=X	Y	MEAN	STDV	NPIXELS
  0	  0	153.3	17.4	 16
  1	  0	10452.8	818.7	 16
  2	  0	166.5	20.2	 16
  3	  0	10409.5	885.2	 16
  4	  0	104.3	15.6	 16
  5	  0	144.0	22.6	 16
  6	  0	9323.3	813.9	 16
  7	  0	152.0	23.8	 16
  8	  0	9026.8	912.9	 16
  9	  0	141.0	19.2	 16
 10	  0	9281.8	1067.8	 16
 11	  0	136.3	15.0	 16
 12	  0	9562.0	2280.1	 16
 13	  0	139.0	25.2	 16
 14	  0	9205.0	1734.7	 16
 15	  0	163.5	22.5	 16
 16	  0	8960.3	1647.6	 16
 17	  0	138.3	31.7	 16
 18	  0	8795.5	1350.0	 16
 19	  0	162.5	26.7	 16
 20	  0	8838.3	1178.6	 16
 21	  0	140.3	22.3	 16
 22	  0	8917.0	1017.4	 16
 23	  0	133.3	13.9	 16
 24	  0	8685.0	810.9	 16
 25	  0	133.3	13.2	 16
 26	  0	8620.3	660.7	 16
 27	  0	146.3	19.9	 16
 28	  0	8825.5	628.0	 16
 29	  0	132.3	18.6	 16
 30	  0	8936.0	733.3	 16
 31	  0	141.0	26.3	 16
 32	  0	8699.5	852.7	 16
 33	  0	129.5	24.0	 16
 34	  0	8446.3	1654.2	 16
 35	  0	141.0	23.9	 16
 36	  0	8555.3	1441.6	 16
 37	  0	125.8	18.2	 16
 38	  0	8885.5	1207.3	 16
 39	  0	113.5	18.8	 16
 40	  0	9055.8	882.3	 16
 41	  0	121.8	14.2	 16
 42	  0	8914.0	895.4	 16
 43	  0	135.3	15.6	 16
 44	  0	8965.5	801.3	 16
 45	  0	129.5	23.2	 16
 46	  0	8579.0	693.6	 16
 47	  0	111.0	20.8	 16
 48	  0	8512.3	669.4	 16
 49	  0	136.3	17.6	 16
 50	  0	8343.0	609.6	 16
 51	  0	137.0	23.3	 16
 52	  0	8251.3	707.0	 16
 53	  0	132.5	20.7	 16
 54	  0	7981.0	848.0	 16
 55	  0	156.3	30.1	 16
 56	  0	8360.5	1648.0	 16
 57	  0	120.5	19.4	 16
 58	  0	8472.3	1429.1	 16
 59	  0	134.3	26.1	 16
 60	  0	8575.3	1420.2	 16
 61	  0	161.0	27.9	 16
 62	  0	8387.3	1186.5	 16
 63	  0	127.0	21.3	 16
 64	  0	8420.8	1138.9	 16
 65	  0	123.8	19.8	 16
 66	  0	8284.0	1061.6	 16
 67	  0	146.0	27.8	 16
 68	  0	8202.0	981.6	 16
 69	  0	142.5	29.6	 16
 70	  0	8048.5	855.0	 16
 71	  0	130.0	24.8	 16
 72	  0	7678.0	827.1	 16
 73	  0	134.5	26.3	 20
 74	  0	7821.5	1442.4	 16
 75	  0	149.5	28.7	 16
 76	  0	8269.0	1606.1	 16
 77	  0	155.3	29.3	 16
 78	  0	8220.8	1962.7	 16
 79	  0	139.0	29.7	 16
 80	  0	8296.0	1894.3	 16
 81	  0	125.0	25.1	 16
 82	  0	8206.3	1631.0	 16
 83	  0	136.0	22.9	 16
 84	  0	8488.0	1638.6	 16
 85	  0	120.3	21.4	 16
 86	  0	8317.0	1474.3	 16
 87	  0	135.5	22.3	 16
 88	  0	8456.3	1346.3	 16
 89	  0	120.5	16.7	 16
 90	  0	8802.5	1331.7	 16
 91	  0	128.5	22.0	 16
 92	  0	8436.0	1176.0	 16
 93	  0	138.3	21.2	 16
 94	  0	8481.8	1087.2	 16
 95	  0	151.8	26.8	 16
 96	  0	8589.8	1194.4	 16
 97	  0	119.5	21.7	 16
 98	  0	8044.0	1093.2	 16
 99	  0	133.3	20.1	 16
100	  0	8381.3	1905.3	 16
101	  0	132.0	23.7	 16
102	  0	8723.3	1830.6	 16
103	  0	131.0	22.4	 16
104	  0	8303.0	1641.3	 16
105	  0	126.8	22.7	 16
106	  0	8108.5	1585.4	 16
107	  0	117.5	19.0	 16
108	  0	8030.0	1448.4	 16
109	  0	113.5	23.7	 16
110	  0	8183.8	1349.5	 16
111	  0	126.5	18.5	 16
112	  0	8146.0	1332.3	 16
113	  0	131.0	34.9	 16
114	  0	8405.3	1105.5	 16
115	  0	187.8	28.3	 16
116	  0	8872.5	1240.7	 16
117	  0	130.5	19.2	 16
118	  0	8343.8	1280.5	 16
119	  0	120.0	19.7	 16
120	  0	8163.0	1185.2	 16
121	  0	197.5	41.7	 16
122	  0	8541.3	1967.8	 16
123	  0	318.5	95.3	 16
124	  0	8418.5	2039.4	 16
125	  0	137.8	23.4	 16
126	  0	8178.8	1777.7	 16
127	  0	128.8	23.7	 16
128	  0	8365.5	1742.6	 16
129	  0	117.0	20.6	 16
130	  0	8430.3	1739.5	 16
131	  0	130.5	19.2	 16
132	  0	8248.5	1486.0	 16
133	  0	142.0	18.9	 16
134	  0	8076.5	1473.2	 16
135	  0	153.8	26.8	 16
136	  0	7813.3	1439.6	 16
137	  0	134.8	19.0	 16
138	  0	8017.0	1347.0	 16
139	  0	116.3	14.8	 16
140	  0	8016.3	1193.7	 16
141	  0	123.3	19.3	 16
142	  0	7915.0	1154.7	 16
143	  0	134.3	19.6	 16
144	  0	7963.8	1154.3	 16
145	  0	161.0	23.2	 16
146	  0	7645.5	1640.3	 16
147	  0	125.8	20.3	 16
148	  0	7690.5	1464.2	 16
149	  0	115.0	21.0	 16
150	  0	7622.0	1250.3	 16
151	  0	108.3	20.7	 16
152	  0	8014.0	1014.5	 16
153	  0	122.3	17.1	 16
154	  0	8514.3	1016.8	 16
155	  0	129.0	14.9	 16
156	  0	8231.8	736.3	 16
157	  0	126.3	22.1	 16
158	  0	8145.0	741.8	 16
159	  0	142.0	18.7	 16
160	  0	8014.0	660.1	 16
161	  0	142.8	28.9	 16
162	  0	7463.8	684.4	 16
163	  0	119.8	16.3	 16
164	  0	6999.5	566.9	 16
165	  0	111.5	15.2	 16
166	  0	7060.3	674.5	 16
167	  0	115.8	15.1	 16
168	  0	7081.3	1470.9	 16
169	  0	115.3	18.0	 16
170	  0	7231.8	1251.0	 16
171	  0	113.5	16.3	 16
172	  0	7421.5	1083.5	 16
173	  0	120.3	21.6	 16
174	  0	7286.5	990.8	 16
175	  0	116.3	24.5	 16
176	  0	7777.5	976.5	 16
177	  0	111.5	18.2	 16
178	  0	7294.0	775.1	 16
179	  0	116.8	19.0	 16
180	  0	7231.8	826.1	 16
181	  0	109.3	16.2	 16
182	  0	7075.0	773.1	 16
183	  0	108.0	24.7	 16
184	  0	6755.0	770.7	 16
185	  0	135.0	29.7	 16
186	  0	6921.5	802.2	 16
187	  0	115.3	16.6	 16
188	  0	7145.3	682.9	 16
189	  0	121.5	23.8	 16
190	  0	7403.8	1394.6	 16
191	  0	111.0	24.7	 16
192	  0	7285.0	1267.6	 16
193	  0	95.5	17.1	 16
194	  0	7245.5	979.8	 16
195	  0	105.5	15.4	 16
196	  0	7361.8	1017.3	 16
197	  0	115.8	23.0	 16
198	  0	7421.0	923.6	 16
199	  0	111.3	14.9	 16
200	  0	7338.3	949.9	 16
201	  0	123.5	19.9	 16
202	  0	7640.3	1020.4	 16
203	  0	119.5	26.3	 16
204	  0	7532.8	936.0	 16
205	  0	119.3	18.5	 16
206	  0	7766.5	924.9	 16
207	  0	94.5	17.8	 16
208	  0	7622.5	877.1	 16
209	  0	126.5	24.3	 16
210	  0	7675.5	885.7	 16
211	  0	119.3	34.0	 16
212	  0	7350.0	1380.6	 16
213	  0	109.3	24.9	 16
214	  0	7171.5	1264.8	 16
215	  0	123.5	21.3	 20
216	  0	7197.8	1499.0	 16
217	  0	104.5	18.2	 16
218	  0	7150.3	1377.6	 16
219	  0	111.5	40.5	 16
220	  0	7059.8	1232.4	 16
221	  0	99.3	20.3	 16
222	  0	7054.5	1200.2	 16
223	  0	109.0	20.7	 16
224	  0	7215.8	1121.6	 16
225	  0	103.3	13.3	 16
226	  0	6908.5	1145.6	 16
227	  0	114.8	17.2	 16
228	  0	6727.5	1023.0	 16
229	  0	128.3	22.1	 16
230	  0	7245.0	1129.8	 16
231	  0	89.5	14.6	 16
232	  0	7238.0	1157.3	 16
233	  0	103.3	17.9	 16
234	  0	7428.0	1684.8	 16
235	  0	58.5	12.2	 16
236	  0	3265.3	778.4	 16
237	  0	51.8	9.1	 16
238	  0	86.5	13.9	 16
239	  0	66.3	20.4	 16
240	  0	7928.5	1436.3	 16
241	  0	109.8	21.1	 16
242	  0	7346.3	1314.6	 16
243	  0	111.8	11.0	 16
244	  0	6892.3	1254.7	 16
245	  0	106.3	22.7	 16
246	  0	6697.5	1269.0	 16
247	  0	121.5	18.9	 16
248	  0	6835.3	1049.7	 16
249	  0	107.8	16.6	 16
250	  0	7116.8	1197.7	 16
251	  0	124.0	19.7	 16
252	  0	6972.5	1146.8	 16
253	  0	114.0	18.7	 16
254	  0	6903.8	1134.3	 16
255	  0	111.5	19.7	 16
256	  0	6646.8	1543.5	 16
257	  0	128.5	26.0	 16
258	  0	6553.0	1446.9	 16
259	  0	114.3	18.8	 16
260	  0	6522.8	1292.7	 16
261	  0	122.3	24.3	 16
262	  0	6629.3	1160.3	 16
263	  0	106.0	11.9	 16
264	  0	6925.5	1087.4	 16
265	  0	116.3	18.0	 16
266	  0	6736.8	926.7	 16
267	  0	106.0	20.7	 16
268	  0	6915.5	922.2	 16
269	  0	101.0	11.9	 16
270	  0	6558.3	825.2	 16
271	  0	118.3	21.7	 16
272	  0	6587.0	710.9	 16
273	  0	110.5	13.9	 16
274	  0	6662.0	888.7	 16
275	  0	107.8	15.1	 16
276	  0	6755.8	886.8	 16
277	  0	103.8	18.3	 16
278	  0	6763.0	1725.9	 16
279	  0	115.0	19.4	 16
280	  0	6884.3	1516.9	 16
281	  0	106.0	28.6	 16
282	  0	7240.8	1441.0	 16
283	  0	91.8	13.8	 16
284	  0	7812.5	1299.4	 16
285	  0	124.0	18.3	 16
286	  0	7832.5	1286.0	 16
287	  0	105.0	12.7	 16
288	  0	7390.3	1036.8	 16
289	  0	113.8	23.9	 16
290	  0	7256.8	836.3	 16
291	  0	119.8	26.5	 16
292	  0	6928.5	765.1	 16
293	  0	100.0	20.4	 16
294	  0	6847.5	699.5	 16
295	  0	105.3	15.9	 16
296	  0	6757.3	591.1	 16
297	  0	99.3	14.0	 16
298	  0	6897.0	614.5	 16
299	  0	117.3	28.5	 16
300	  0	7117.8	1677.5	 16
301	  0	111.5	20.5	 16
302	  0	7156.8	1569.9	 16
303	  0	116.5	20.3	 16
304	  0	7215.3	1306.1	 16
305	  0	101.0	12.3	 16
306	  0	7453.8	1211.9	 16
307	  0	114.8	20.6	 16
308	  0	7753.3	1129.3	 16
309	  0	126.5	26.7	 16
310	  0	7724.3	957.7	 16
311	  0	111.0	17.5	 16
312	  0	7486.3	857.1	 16
313	  0	140.0	22.1	 16
314	  0	7789.3	674.6	 16
315	  0	115.5	23.4	 16
316	  0	8271.3	635.3	 16
317	  0	118.0	19.1	 16
318	  0	7935.3	667.1	 16
319	  0	107.8	14.2	 16
320	  0	7467.0	752.7	 16
321	  0	116.5	19.3	 16
322	  0	7705.8	786.7	 16
323	  0	120.3	22.6	 16
324	  0	7542.8	1596.3	 16
325	  0	121.0	23.2	 16
326	  0	7738.8	1402.8	 16
327	  0	139.8	39.6	 16
328	  0	8082.5	1227.4	 16
329	  0	110.8	21.5	 16
330	  0	8095.8	1143.3	 16
331	  0	109.0	13.3	 16
332	  0	7948.0	1050.6	 16
333	  0	113.0	15.1	 16
334	  0	7827.5	914.8	 16
335	  0	116.0	23.4	 16
336	  0	7784.0	811.5	 16
337	  0	114.5	12.4	 16
338	  0	7784.8	757.5	 16
339	  0	122.8	18.1	 16
340	  0	7461.8	807.6	 16
341	  0	112.5	22.8	 16
342	  0	7786.3	787.4	 16
343	  0	120.3	16.2	 16
344	  0	7768.3	821.5	 16
345	  0	123.5	21.4	 16
346	  0	7731.5	1388.5	 16
347	  0	124.5	24.6	 16
348	  0	7654.3	1097.1	 16
349	  0	125.5	30.7	 16
350	  0	7828.3	1087.8	 16
351	  0	116.5	12.9	 16
352	  0	7951.8	1015.7	 16
353	  0	117.5	21.7	 16
354	  0	7874.0	877.8	 16
355	  0	124.0	20.0	 16
356	  0	7361.5	868.9	 16
357	  0	121.0	18.4	 16
358	  0	7464.8	1413.2	 20
359	  0	126.8	24.3	 16
360	  0	7871.3	1556.9	 16
361	  0	111.8	15.9	 16
362	  0	7643.3	1494.5	 16
363	  0	119.0	19.7	 16
364	  0	7316.3	1350.7	 16
365	  0	122.3	17.7	 16
366	  0	7295.8	1230.9	 16
367	  0	95.8	20.8	 16
368	  0	7433.3	1673.6	 16
369	  0	118.5	20.7	 16
370	  0	7476.8	1606.9	 16
371	  0	139.0	18.1	 16
372	  0	8042.8	1404.5	 16
373	  0	136.3	21.0	 16
374	  0	7981.3	1344.6	 16
375	  0	120.3	17.1	 16
376	  0	8114.3	1265.4	 16
377	  0	125.3	22.8	 16
378	  0	8081.5	1112.0	 16
379	  0	110.5	13.1	 16
380	  0	8093.5	1074.3	 16
381	  0	120.3	16.7	 16
382	  0	7825.0	928.3	 16
383	  0	119.8	17.1	 16
384	  0	7766.3	899.1	 16
385	  0	116.3	19.7	 16
386	  0	7367.0	745.2	 16
387	  0	119.5	15.2	 16
388	  0	7761.0	730.6	 16
389	  0	100.5	15.2	 16
390	  0	7957.5	1710.3	 16
391	  0	114.0	20.6	 16
392	  0	7955.3	1441.7	 16
393	  0	111.5	18.0	 16
394	  0	8132.0	1253.7	 16
395	  0	102.0	14.3	 16
396	  0	8461.3	1149.8	 16
397	  0	106.5	15.4	 16
398	  0	7927.0	966.3	 16
399	  0	123.5	24.6	 16
400	  0	8022.8	905.9	 16
401	  0	103.8	12.7	 16
402	  0	8003.3	848.4	 16
403	  0	132.0	20.3	 16
404	  0	8037.0	867.8	 16
405	  0	113.3	15.6	 16
406	  0	7894.0	791.7	 16
407	  0	119.5	16.6	 16
408	  0	7774.0	847.7	 16
409	  0	122.3	22.6	 16
410	  0	7535.0	817.3	 16
411	  0	110.5	16.4	 16
412	  0	7397.5	1689.1	 16
413	  0	100.5	22.6	 16
414	  0	7181.3	1513.3	 16
415	  0	114.0	15.2	 16
416	  0	7439.3	1384.1	 16
417	  0	121.0	11.9	 16
418	  0	7798.3	1132.4	 16
419	  0	149.5	25.4	 16
420	  0	7968.3	1061.6	 16
421	  0	105.5	18.3	 16
422	  0	8100.0	1053.0	 16
423	  0	129.8	19.7	 16
424	  0	7802.8	994.8	 16
425	  0	115.3	14.9	 16
426	  0	7122.3	968.2	 16
427	  0	112.5	22.0	 16
428	  0	6978.3	840.7	 16
429	  0	111.5	16.5	 16
430	  0	7208.0	979.3	 16
431	  0	102.3	13.1	 16
432	  0	7747.3	1046.1	 16
433	  0	104.5	21.2	 16
434	  0	7458.0	1792.9	 16
435	  0	91.5	9.5	 16
436	  0	7567.3	1735.3	 16
437	  0	98.5	19.6	 16
438	  0	8094.5	1647.6	 16
439	  0	115.8	25.4	 16
440	  0	8325.5	1372.7	 16
441	  0	119.0	18.1	 16
442	  0	7915.8	1147.3	 16
443	  0	125.0	22.6	 16
444	  0	8187.3	1008.6	 16
445	  0	106.3	15.8	 16
446	  0	8291.0	1022.9	 16
447	  0	119.5	23.2	 16
448	  0	7721.5	789.6	 16
449	  0	126.3	27.9	 16
450	  0	7608.5	683.3	 16
451	  0	109.3	11.8	 16
452	  0	7728.3	650.0	 16
453	  0	132.3	18.4	 16
454	  0	7523.8	659.3	 16
455	  0	117.8	13.3	 16
456	  0	8100.8	1847.4	 16
457	  0	121.0	20.5	 16
458	  0	8068.8	1724.9	 16
459	  0	117.0	20.4	 16
460	  0	7810.8	1500.4	 16
461	  0	104.5	13.7	 16
462	  0	7755.0	1318.5	 16
463	  0	108.3	14.7	 16
464	  0	7684.3	1172.7	 16
465	  0	120.8	14.0	 16
466	  0	8022.5	973.0	 16
467	  0	119.0	17.4	 16
468	  0	8264.3	978.5	 16
469	  0	104.0	14.2	 16
470	  0	8198.8	820.2	 16
471	  0	120.5	34.5	 16
472	  0	63.8	10.7	 16
473	  0	4033.8	460.9	 16
474	  0	57.8	18.0	 16
475	  0	102.3	23.6	 16
476	  0	54.5	15.8	 16
477	  0	113.5	18.4	 16
478	  0	7901.8	1826.0	 16
479	  0	105.5	17.7	 16
480	  0	7510.0	1564.4	 16
481	  0	110.3	16.9	 16
482	  0	7962.3	1481.7	 16
483	  0	113.8	18.8	 16
484	  0	7774.0	1314.0	 16
485	  0	107.0	12.5	 16
486	  0	7824.8	1243.7	 16
487	  0	112.8	14.5	 16
488	  0	7661.5	1138.7	 16
489	  0	111.8	24.7	 16
490	  0	8132.8	1103.4	 16
491	  0	132.0	18.9	 16
492	  0	8008.8	932.8	 16
493	  0	128.8	17.7	 16
494	  0	8173.3	974.5	 16
495	  0	125.5	20.5	 16
496	  0	8314.3	1062.8	 16
497	  0	112.0	21.1	 16
498	  0	8122.5	969.6	 16
499	  0	108.3	13.5	 16
500	  0	7608.5	1347.4	 20
501	  0	125.3	26.1	 16
502	  0	7344.3	1776.7	 16
503	  0	101.3	20.5	 16
504	  0	7423.8	1619.2	 16
505	  0	108.3	24.4	 16
506	  0	7811.3	1437.2	 16
507	  0	119.5	21.4	 16
508	  0	8597.0	1385.6	 16
509	  0	110.0	18.7	 16
510	  0	8285.3	1294.1	 16
511	  0	108.0	13.1	 16
512	  0	8371.3	1251.2	 16
513	  0	117.3	17.5	 16
514	  0	8131.8	1044.4	 16
515	  0	126.0	26.6	 16
516	  0	7899.5	913.9	 16
517	  0	110.5	17.3	 16
518	  0	8065.3	943.8	 16
519	  0	118.5	15.3	 16
520	  0	8166.8	869.9	 16
521	  0	97.5	13.1	 16
522	  0	7906.3	868.7	 16
523	  0	120.3	25.1	 16
524	  0	7719.8	1672.9	 16
525	  0	112.5	14.0	 16
526	  0	8008.8	1596.1	 16
527	  0	119.8	25.1	 16
528	  0	8219.0	1324.4	 16
529	  0	106.0	20.8	 16
530	  0	8324.3	1337.7	 16
531	  0	134.0	28.3	 16
532	  0	8065.0	1089.1	 16
533	  0	122.0	19.2	 16
534	  0	8350.3	1107.0	 16
535	  0	123.5	17.3	 16
536	  0	8134.0	1040.0	 16
537	  0	134.0	28.0	 16
538	  0	8085.3	991.2	 16
539	  0	106.3	20.0	 16
540	  0	8147.0	963.1	 16
541	  0	128.8	24.6	 16
542	  0	8131.3	886.1	 16
543	  0	114.8	19.5	 16
544	  0	8295.8	959.4	 16
545	  0	110.3	18.1	 16
546	  0	8113.8	1945.5	 16
547	  0	117.3	23.7	 16
548	  0	8046.0	1818.5	 16
549	  0	123.3	17.5	 16
550	  0	8316.3	1727.8	 16
551	  0	177.5	30.5	 16
552	  0	7905.0	1416.9	 16
553	  0	126.0	23.9	 16
554	  0	8180.3	1288.2	 16
555	  0	116.5	15.7	 16
556	  0	8248.8	1106.3	 16
557	  0	111.8	12.2	 16
558	  0	8476.8	969.4	 16
559	  0	128.8	23.2	 16
560	  0	8302.5	933.5	 16
561	  0	127.5	17.2	 16
562	  0	8171.8	842.3	 16
563	  0	120.0	13.5	 16
564	  0	7966.0	949.2	 16
565	  0	115.3	13.6	 16
566	  0	8250.0	988.7	 16
567	  0	117.5	16.3	 16
568	  0	8415.0	1958.1	 16
569	  0	128.8	31.7	 16
570	  0	8732.8	1805.6	 16
571	  0	122.5	27.6	 16
572	  0	8498.5	1694.0	 16
573	  0	133.3	14.2	 16
574	  0	8473.8	1506.6	 16
575	  0	123.0	18.9	 16
576	  0	8563.5	1419.8	 16
577	  0	108.3	20.3	 16
578	  0	8925.5	1129.6	 16
579	  0	111.3	19.3	 16
580	  0	9298.8	1015.6	 16
581	  0	117.5	15.6	 16
582	  0	8998.8	920.7	 16
583	  0	128.8	21.9	 16
584	  0	8825.8	757.1	 16
585	  0	130.3	19.3	 16
586	  0	9020.3	893.6	 16
587	  0	235.0	41.6	 16
588	  0	8804.3	936.5	 16
589	  0	162.0	29.6	 16
590	  0	8469.0	1924.1	 16
591	  0	119.5	18.6	 16
592	  0	8465.5	1959.8	 16
593	  0	118.0	17.2	 16
594	  0	8246.5	1792.7	 16
595	  0	105.8	16.9	 16
596	  0	8419.0	1550.9	 16
597	  0	110.3	13.0	 16
598	  0	8457.3	1402.2	 16
599	  0	388.0	119.5	 16
600	  0	10188.8	1605.9	 16
601	  0	801.0	159.4	 16
602	  0	10498.8	1301.9	 16
603	  0	334.5	124.0	 16
604	  0	9508.3	1900.3	 16
605	  0	113.5	25.1	 16
606	  0	8611.8	1012.5	 16
607	  0	121.5	16.7	 16
608	  0	8202.5	959.2	 16
609	  0	123.0	22.9	 16
610	  0	8618.8	1080.8	 16
611	  0	121.8	19.4	 16
612	  0	8337.0	1976.8	 16
613	  0	87.0	16.6	 16
614	  0	7586.3	1737.7	 16
615	  0	88.5	15.2	 16
616	  0	8039.5	1744.5	 16
617	  0	105.8	18.2	 16
618	  0	8524.8	1543.0	 16
619	  0	128.0	21.5	 16
620	  0	8677.5	1488.5	 16
621	  0	121.0	19.7	 16
622	  0	8371.8	1339.2	 16
623	  0	131.3	19.7	 16
624	  0	8701.5	1360.8	 16
625	  0	120.8	24.0	 16
626	  0	9352.5	1437.8	 16
627	  0	146.8	28.3	 16
628	  0	8991.3	1434.9	 16
629	  0	141.3	20.7	 16
630	  0	8746.3	1377.3	 16
631	  0	136.0	25.7	 16
632	  0	8412.8	1335.7	 16
633	  0	145.3	40.3	 16
634	  0	8167.3	2137.0	 16
635	  0	129.5	25.8	 16
636	  0	8532.8	2045.8	 16
637	  0	141.0	24.9	 16
638	  0	9070.5	1993.4	 16
639	  0	145.0	39.8	 16
640	  0	8901.3	1799.9	 16
641	  0	128.5	32.2	 16
642	  0	8687.3	1693.8	 20
643	  0	138.3	24.1	 16
644	  0	8658.3	1570.4	 16
645	  0	145.5	26.5	 16
646	  0	8813.5	1335.2	 16
647	  0	119.5	28.7	 16
648	  0	8660.3	1347.9	 16
649	  0	140.5	28.9	 16
650	  0	8506.5	1331.6	 16
651	  0	129.0	25.0	 16
652	  0	8418.3	1311.4	 16
653	  0	148.5	19.7	 16
654	  0	7905.5	1263.5	 16
655	  0	142.0	29.5	 16
656	  0	7893.8	2141.7	 16
657	  0	130.5	38.7	 16
658	  0	8138.5	1938.1	 16
659	  0	130.3	28.7	 16
660	  0	8081.5	1832.0	 16
661	  0	141.5	25.1	 16
662	  0	8216.0	1713.6	 16
663	  0	139.3	26.3	 16
664	  0	7935.3	1575.3	 16
665	  0	140.0	23.4	 16
666	  0	7862.0	1391.1	 16
667	  0	126.3	17.4	 16
668	  0	7858.0	1373.0	 16
669	  0	137.3	25.0	 16
670	  0	7265.5	1239.4	 16
671	  0	125.8	19.9	 16
672	  0	6939.5	997.5	 16
673	  0	162.3	87.5	 16
674	  0	8724.5	4628.8	 16
675	  0	134.3	18.7	 16
676	  0	7282.8	966.8	 16
677	  0	135.3	22.0	 16
678	  0	7284.5	991.8	 16
679	  0	136.3	21.2	 16
680	  0	7475.3	1682.9	 16
681	  0	123.5	14.3	 16
682	  0	7721.3	1648.1	 16
683	  0	147.3	20.3	 16
684	  0	7807.8	1548.2	 16
685	  0	133.8	19.0	 16
686	  0	8017.3	1391.3	 16
687	  0	144.8	21.7	 16
688	  0	8379.0	1244.2	 16
689	  0	133.3	16.1	 16
690	  0	8410.8	1212.7	 16
691	  0	139.5	21.0	 16
692	  0	8373.0	980.6	 16
693	  0	148.3	22.0	 16
694	  0	8457.0	806.1	 16
695	  0	137.8	16.2	 16
696	  0	8572.0	822.6	 16
697	  0	135.0	20.2	 16
698	  0	7867.3	766.4	 16
699	  0	187.0	55.2	 16
700	  0	7843.3	848.0	 16
701	  0	145.8	25.8	 16
702	  0	8440.5	2054.1	 16
703	  0	134.3	26.6	 16
704	  0	8725.5	1835.6	 16
705	  0	147.3	22.2	 16
706	  0	9092.3	1645.7	 16
707	  0	94.0	16.9	 16
708	  0	135.5	14.0	 16
709	  0	9413.0	1415.6	 16
710	  0	139.5	18.8	 16
711	  0	9802.8	1349.2	 16
  0	  1	10560.5	982.6	 16
  1	  1	165.8	28.7	 16
  2	  1	9829.8	819.9	 16
  3	  1	167.0	21.2	 16
  4	  1	100.3	12.4	 16
  5	  1	310.5	36.3	 16
  6	  1	151.3	17.1	 16
  7	  1	115.0	13.6	 16
  8	  1	220.3	25.7	 16
  9	  1	117.0	10.3	 16
 10	  1	172.8	30.0	 16
 11	  1	147.0	12.1	 16
 12	  1	123.5	14.2	 16
 13	  1	183.0	21.0	 16
 14	  1	229.0	32.2	 16
 15	  1	240.5	31.3	 16
 16	  1	253.5	43.5	 16
 17	  1	223.8	29.7	 16
 18	  1	100.3	15.3	 16
 19	  1	433.3	49.1	 16
 20	  1	594.0	82.8	 16
 21	  1	96.5	12.5	 16
 22	  1	946.3	87.4	 16
 23	  1	127.3	15.8	 16
 24	  1	328.0	30.3	 16
 25	  1	1350.8	88.3	 16
 26	  1	458.8	74.9	 16
 27	  1	377.5	47.2	 16
 28	  1	177.5	27.1	 16
 29	  1	433.8	41.9	 16
 30	  1	133.5	15.7	 16
 31	  1	90.3	20.1	 16
 32	  1	122.5	18.9	 16
 33	  1	112.5	20.1	 16
 34	  1	452.3	58.4	 16
 35	  1	206.0	28.9	 16
 36	  1	178.3	21.2	 16
 37	  1	171.0	34.9	 16
 38	  1	432.5	56.2	 16
 39	  1	193.5	33.3	 16
 40	  1	289.0	41.0	 16
 41	  1	124.5	14.9	 16
 42	  1	1104.5	111.9	 16
 43	  1	314.0	29.6	 16
 44	  1	130.3	13.1	 16
 45	  1	809.8	53.5	 16
 46	  1	121.5	15.0	 16
 47	  1	718.8	69.0	 16
 48	  1	156.0	18.4	 16
 49	  1	269.5	33.3	 16
 50	  1	192.0	31.9	 16
 51	  1	240.0	29.6	 16
 52	  1	573.5	75.7	 16
 53	  1	100.3	14.1	 16
 54	  1	98.0	21.2	 16
 55	  1	203.8	28.1	 16
 56	  1	195.3	22.1	 16
 57	  1	274.5	40.4	 16
 58	  1	2707.0	315.8	 16
 59	  1	101.0	17.7	 16
 60	  1	134.8	14.6	 16
 61	  1	100.8	11.0	 16
 62	  1	295.0	49.3	 16
 63	  1	111.5	13.1	 16
 64	  1	293.5	31.7	 16
 65	  1	170.8	23.3	 16
 66	  1	506.0	68.3	 16
 67	  1	244.8	32.8	 16
 68	  1	617.8	69.0	 16
 69	  1	82.8	18.7	 16
 70	  1	108.0	23.9	 16
 71	  1	583.3	78.3	 16
 72	  1	182.3	21.4	 16
 73	  1	768.3	102.2	 16
 74	  1	905.8	101.1	 16
 75	  1	73.0	8.8	 16
 76	  1	344.0	71.0	 16
 77	  1	113.0	21.0	 20
 78	  1	329.0	50.4	 16
 79	  1	101.0	15.9	 16
 80	  1	206.0	41.5	 16
 81	  1	126.0	23.0	 16
 82	  1	325.0	42.1	 16
 83	  1	152.0	29.3	 16
 84	  1	146.0	29.8	 16
 85	  1	91.8	21.0	 16
 86	  1	93.5	13.1	 16
 87	  1	1019.8	99.4	 16
 88	  1	200.8	29.0	 16
 89	  1	566.5	57.7	 16
 90	  1	149.0	19.0	 16
 91	  1	321.8	47.2	 16
 92	  1	106.8	16.8	 16
 93	  1	193.8	41.7	 16
 94	  1	268.0	36.6	 16
 95	  1	278.0	27.4	 16
 96	  1	83.3	14.8	 16
 97	  1	594.0	99.8	 16
 98	  1	112.3	20.3	 16
 99	  1	297.8	46.4	 16
100	  1	1021.8	152.9	 16
101	  1	98.3	18.3	 16
102	  1	76.5	16.1	 16
103	  1	365.5	57.4	 16
104	  1	148.3	30.2	 16
105	  1	223.8	35.9	 16
106	  1	285.0	54.4	 16
107	  1	186.0	25.4	 16
108	  1	124.0	19.2	 16
109	  1	76.0	12.3	 16
110	  1	109.5	28.9	 16
111	  1	467.0	54.2	 16
112	  1	242.3	22.9	 16
113	  1	214.0	33.7	 16
114	  1	447.3	67.5	 16
115	  1	178.3	18.0	 16
116	  1	291.0	68.1	 16
117	  1	216.3	41.2	 16
118	  1	104.5	42.6	 16
119	  1	262.5	43.0	 16
120	  1	1207.8	198.1	 16
121	  1	151.3	19.6	 16
122	  1	479.0	93.8	 16
123	  1	171.8	30.7	 16
124	  1	116.5	24.7	 16
125	  1	126.3	28.0	 16
126	  1	166.5	43.5	 16
127	  1	217.3	36.8	 16
128	  1	317.3	55.3	 16
129	  1	99.8	13.1	 16
130	  1	169.3	23.9	 16
131	  1	156.0	31.9	 16
132	  1	184.8	23.2	 16
133	  1	208.3	21.9	 16
134	  1	242.5	17.9	 16
135	  1	181.5	23.9	 16
136	  1	144.5	18.9	 16
137	  1	79.8	8.6	 16
138	  1	139.3	31.4	 16
139	  1	113.0	17.4	 16
140	  1	121.0	22.9	 16
141	  1	96.3	21.8	 16
142	  1	327.0	28.6	 16
143	  1	219.3	34.3	 16
144	  1	485.5	60.0	 16
145	  1	1148.8	167.8	 16
146	  1	390.8	34.8	 16
147	  1	84.5	12.6	 16
148	  1	1190.8	146.3	 16
149	  1	150.8	19.6	 16
150	  1	118.3	19.4	 16
151	  1	158.5	24.7	 16
152	  1	363.0	45.5	 16
153	  1	201.3	30.3	 16
154	  1	90.5	14.0	 16
155	  1	106.3	12.0	 16
156	  1	1092.3	125.5	 16
157	  1	337.3	30.3	 16
158	  1	126.5	27.2	 16
159	  1	141.8	22.1	 16
160	  1	201.3	35.6	 16
161	  1	470.0	57.0	 16
162	  1	269.5	28.3	 16
163	  1	548.8	99.9	 16
164	  1	806.0	133.8	 16
165	  1	131.3	21.4	 16
166	  1	163.0	20.2	 16
167	  1	400.3	48.8	 16
168	  1	194.0	32.8	 16
169	  1	72.5	14.2	 16
170	  1	193.0	26.9	 16
171	  1	98.0	14.9	 16
172	  1	518.3	63.0	 16
173	  1	136.3	19.4	 16
174	  1	113.8	14.6	 16
175	  1	3998.3	354.9	 16
176	  1	230.8	36.0	 16
177	  1	385.8	35.8	 16
178	  1	150.3	25.1	 16
179	  1	146.5	19.7	 16
180	  1	168.3	23.8	 16
181	  1	221.0	17.8	 16
182	  1	93.8	14.9	 16
183	  1	317.5	51.8	 16
184	  1	157.0	22.7	 16
185	  1	94.0	11.2	 16
186	  1	136.0	21.0	 16
187	  1	232.3	25.5	 16
188	  1	113.8	19.2	 16
189	  1	1464.8	225.2	 16
190	  1	99.3	20.3	 16
191	  1	110.5	21.3	 16
192	  1	286.3	31.2	 16
193	  1	192.0	22.6	 16
194	  1	130.8	17.2	 16
195	  1	257.3	29.8	 16
196	  1	157.8	17.9	 16
197	  1	131.8	27.4	 16
198	  1	176.5	28.7	 16
199	  1	268.3	56.4	 16
200	  1	278.8	35.6	 16
201	  1	128.0	20.0	 16
202	  1	864.0	118.9	 16
203	  1	197.8	20.4	 16
204	  1	80.3	14.0	 16
205	  1	131.8	21.8	 16
206	  1	478.8	69.7	 16
207	  1	135.3	18.8	 16
208	  1	107.0	22.3	 16
209	  1	178.3	34.7	 16
210	  1	95.8	19.6	 16
211	  1	937.8	105.7	 16
212	  1	99.5	17.4	 16
213	  1	102.3	20.2	 16
214	  1	165.8	29.2	 16
215	  1	170.0	31.1	 16
216	  1	78.0	10.9	 16
217	  1	899.0	105.1	 16
218	  1	296.8	29.5	 16
219	  1	143.0	20.3	 16
220	  1	78.3	12.5	 20
221	  1	356.3	47.8	 16
222	  1	88.3	18.9	 16
223	  1	1218.5	147.6	 16
224	  1	79.5	17.4	 16
225	  1	69.8	12.0	 16
226	  1	279.5	30.2	 16
227	  1	182.0	21.7	 16
228	  1	628.3	94.3	 16
229	  1	591.3	96.0	 16
230	  1	466.5	58.6	 16
231	  1	221.3	36.3	 16
232	  1	104.8	15.9	 16
233	  1	139.0	24.3	 16
234	  1	155.5	59.4	 16
235	  1	54.5	13.1	 16
236	  1	529.8	105.9	 16
237	  1	44.8	9.4	 16
238	  1	82.3	15.7	 16
239	  1	44.5	7.2	 16
240	  1	210.8	34.6	 16
241	  1	154.0	24.9	 16
242	  1	97.3	12.6	 16
243	  1	197.3	23.2	 16
244	  1	217.8	32.9	 16
245	  1	216.3	29.5	 16
246	  1	167.0	17.8	 16
247	  1	177.5	38.0	 16
248	  1	63.5	10.0	 16
249	  1	111.3	12.8	 16
250	  1	107.3	22.5	 16
251	  1	98.8	22.4	 16
252	  1	86.5	16.9	 16
253	  1	361.5	61.6	 16
254	  1	82.3	22.3	 16
255	  1	72.3	10.6	 16
256	  1	584.0	89.6	 16
257	  1	87.3	15.7	 16
258	  1	91.3	12.9	 16
259	  1	453.8	73.6	 16
260	  1	99.5	14.9	 16
261	  1	407.3	56.0	 16
262	  1	88.3	12.3	 16
263	  1	96.8	17.3	 16
264	  1	154.8	26.9	 16
265	  1	429.3	51.6	 16
266	  1	80.0	14.6	 16
267	  1	174.0	25.4	 16
268	  1	283.3	39.8	 16
269	  1	69.3	15.2	 16
270	  1	86.0	13.9	 16
271	  1	86.8	13.2	 16
272	  1	92.8	23.0	 16
273	  1	1977.0	218.3	 16
274	  1	72.3	15.8	 16
275	  1	193.3	30.8	 16
276	  1	2606.8	308.6	 16
277	  1	163.5	22.9	 16
278	  1	101.5	18.8	 16
279	  1	297.0	29.0	 16
280	  1	84.5	13.4	 16
281	  1	277.3	49.4	 16
282	  1	254.0	34.5	 16
283	  1	231.5	24.0	 16
284	  1	110.0	22.1	 16
285	  1	195.3	30.0	 16
286	  1	234.3	37.6	 16
287	  1	172.0	25.7	 16
288	  1	127.0	16.9	 16
289	  1	222.3	31.2	 16
290	  1	224.0	25.1	 16
291	  1	94.3	24.1	 16
292	  1	369.5	34.8	 16
293	  1	299.5	48.3	 16
294	  1	153.3	14.0	 16
295	  1	100.3	20.1	 16
296	  1	92.3	13.2	 16
297	  1	91.5	17.8	 16
298	  1	290.0	27.3	 16
299	  1	86.0	14.1	 16
300	  1	69.8	11.5	 16
301	  1	74.5	15.7	 16
302	  1	115.8	16.0	 16
303	  1	296.5	48.1	 16
304	  1	84.8	17.3	 16
305	  1	527.8	73.2	 16
306	  1	433.5	63.9	 16
307	  1	84.0	11.8	 16
308	  1	130.0	22.7	 16
309	  1	275.0	38.3	 16
310	  1	241.5	32.8	 16
311	  1	728.8	71.0	 16
312	  1	305.8	51.4	 16
313	  1	167.0	34.9	 16
314	  1	1249.0	148.3	 16
315	  1	356.5	39.0	 16
316	  1	115.5	21.3	 16
317	  1	168.3	26.7	 16
318	  1	103.3	10.1	 16
319	  1	153.0	23.6	 16
320	  1	158.8	24.7	 16
321	  1	260.8	40.4	 16
322	  1	141.3	15.6	 16
323	  1	286.5	45.0	 16
324	  1	275.3	37.1	 16
325	  1	93.5	14.0	 16
326	  1	202.3	23.5	 16
327	  1	74.3	14.1	 16
328	  1	174.5	21.3	 16
329	  1	608.5	77.0	 16
330	  1	145.0	33.4	 16
331	  1	223.3	26.7	 16
332	  1	615.5	80.9	 16
333	  1	585.5	79.4	 16
334	  1	144.5	15.8	 16
335	  1	3508.8	341.2	 16
336	  1	140.3	19.6	 16
337	  1	1066.8	126.1	 16
338	  1	104.5	30.5	 16
339	  1	79.3	15.5	 16
340	  1	444.0	59.7	 16
341	  1	164.5	19.4	 16
342	  1	211.3	31.5	 16
343	  1	152.3	16.6	 16
344	  1	178.0	29.2	 16
345	  1	593.0	73.7	 16
346	  1	136.5	20.7	 16
347	  1	629.5	76.2	 16
348	  1	609.8	31.1	 16
349	  1	285.5	34.0	 16
350	  1	72.0	12.5	 16
351	  1	72.3	14.4	 16
352	  1	203.3	21.3	 16
353	  1	135.3	12.7	 16
354	  1	12218.0	1149.2	 16
355	  1	2130.0	208.0	 16
356	  1	1153.8	112.0	 16
357	  1	79.3	11.2	 16
358	  1	117.3	29.5	 16
359	  1	161.5	30.1	 16
360	  1	80.5	14.5	 16
361	  1	68.0	9.9	 16
362	  1	86.0	12.7	 20
363	  1	114.8	20.7	 16
364	  1	90.3	15.4	 16
365	  1	72.5	15.4	 16
366	  1	213.0	33.7	 16
367	  1	374.3	91.3	 16
368	  1	895.5	169.5	 16
369	  1	101.8	16.1	 16
370	  1	96.8	15.2	 16
371	  1	11383.0	1813.2	 16
372	  1	152.5	25.1	 16
373	  1	1863.0	285.4	 16
374	  1	130.8	24.0	 16
375	  1	157.3	28.2	 16
376	  1	179.8	24.6	 16
377	  1	307.5	31.7	 16
378	  1	553.8	36.0	 16
379	  1	643.3	79.7	 16
380	  1	112.0	15.9	 16
381	  1	255.3	30.6	 16
382	  1	440.3	34.1	 16
383	  1	472.0	43.3	 16
384	  1	648.0	69.7	 16
385	  1	105.8	15.5	 16
386	  1	146.8	23.9	 16
387	  1	124.3	22.9	 16
388	  1	83.0	16.9	 16
389	  1	77.5	13.7	 16
390	  1	213.5	30.5	 16
391	  1	106.5	15.5	 16
392	  1	85.8	13.8	 16
393	  1	69.0	15.8	 16
394	  1	83.3	15.7	 16
395	  1	290.0	53.9	 16
396	  1	442.0	30.4	 16
397	  1	339.0	46.3	 16
398	  1	173.8	16.9	 16
399	  1	212.5	30.6	 16
400	  1	198.3	24.3	 16
401	  1	125.3	21.9	 16
402	  1	338.5	29.5	 16
403	  1	373.0	44.8	 16
404	  1	1028.3	64.0	 16
405	  1	1129.5	135.0	 16
406	  1	218.5	30.8	 16
407	  1	153.0	25.6	 16
408	  1	245.5	28.8	 16
409	  1	236.0	37.8	 16
410	  1	150.3	23.3	 16
411	  1	343.8	45.5	 16
412	  1	600.5	52.0	 16
413	  1	199.3	21.7	 16
414	  1	199.0	30.3	 16
415	  1	102.5	23.9	 16
416	  1	106.3	16.4	 16
417	  1	636.8	94.9	 16
418	  1	165.3	24.6	 16
419	  1	168.3	19.5	 16
420	  1	447.0	54.0	 16
421	  1	156.8	24.5	 16
422	  1	257.8	25.2	 16
423	  1	468.0	44.7	 16
424	  1	155.3	24.9	 16
425	  1	144.3	20.0	 16
426	  1	395.8	53.3	 16
427	  1	192.5	39.8	 16
428	  1	79.0	10.8	 16
429	  1	610.8	71.3	 16
430	  1	71.3	11.0	 16
431	  1	234.0	22.4	 16
432	  1	233.0	22.5	 16
433	  1	248.5	33.0	 16
434	  1	435.3	53.0	 16
435	  1	119.3	23.1	 16
436	  1	141.3	22.0	 16
437	  1	69.8	13.3	 16
438	  1	104.8	16.3	 16
439	  1	925.0	118.4	 16
440	  1	79.3	13.7	 16
441	  1	227.5	41.0	 16
442	  1	338.5	41.1	 16
443	  1	172.3	33.7	 16
444	  1	112.5	21.3	 16
445	  1	110.5	14.4	 16
446	  1	111.3	19.4	 16
447	  1	68.5	13.2	 16
448	  1	173.8	23.0	 16
449	  1	106.3	23.4	 16
450	  1	115.3	20.8	 16
451	  1	180.3	20.6	 16
452	  1	696.5	59.6	 16
453	  1	660.5	45.8	 16
454	  1	237.3	35.8	 16
455	  1	88.5	16.4	 16
456	  1	946.3	73.1	 16
457	  1	1375.3	83.6	 16
458	  1	169.0	25.0	 16
459	  1	124.8	23.6	 16
460	  1	864.3	91.6	 16
461	  1	186.0	25.5	 16
462	  1	73.3	13.0	 16
463	  1	127.5	27.1	 16
464	  1	225.3	33.4	 16
465	  1	1009.5	55.2	 16
466	  1	309.3	29.6	 16
467	  1	453.8	52.6	 16
468	  1	236.5	32.5	 16
469	  1	120.0	16.3	 16
470	  1	385.5	40.2	 16
471	  1	75.0	12.0	 16
472	  1	53.0	12.1	 16
473	  1	913.0	138.2	 16
474	  1	59.3	7.7	 16
475	  1	83.8	13.3	 16
476	  1	44.3	7.4	 16
477	  1	382.3	59.5	 16
478	  1	339.8	56.5	 16
479	  1	87.0	13.1	 16
480	  1	75.8	14.4	 16
481	  1	85.8	14.9	 16
482	  1	1779.0	268.1	 16
483	  1	194.3	31.4	 16
484	  1	112.3	20.9	 16
485	  1	371.3	45.6	 16
486	  1	2233.5	937.1	 16
487	  1	86.0	21.4	 16
488	  1	70.5	13.3	 16
489	  1	124.3	20.7	 16
490	  1	457.5	46.2	 16
491	  1	150.5	16.5	 16
492	  1	81.5	15.0	 16
493	  1	180.3	22.5	 16
494	  1	181.8	21.9	 16
495	  1	189.0	35.7	 16
496	  1	292.3	32.7	 16
497	  1	234.5	33.6	 16
498	  1	67.5	13.5	 16
499	  1	90.5	21.1	 16
500	  1	86.3	16.0	 16
501	  1	269.0	45.6	 16
502	  1	578.8	100.2	 16
503	  1	172.3	52.4	 16
504	  1	139.8	30.3	 20
505	  1	88.3	16.4	 16
506	  1	360.0	30.7	 16
507	  1	158.8	21.9	 16
508	  1	141.5	23.0	 16
509	  1	206.8	21.8	 16
510	  1	613.8	80.5	 16
511	  1	234.5	28.1	 16
512	  1	133.0	25.6	 16
513	  1	2331.3	343.8	 16
514	  1	114.3	17.3	 16
515	  1	477.5	68.3	 16
516	  1	147.5	17.0	 16
517	  1	205.3	21.1	 16
518	  1	1326.0	157.5	 16
519	  1	1360.5	138.7	 16
520	  1	224.8	27.4	 16
521	  1	65.5	8.5	 16
522	  1	2209.5	334.6	 16
523	  1	274.0	55.7	 16
524	  1	517.3	53.9	 16
525	  1	679.3	83.9	 16
526	  1	276.5	31.7	 16
527	  1	154.0	19.4	 16
528	  1	105.5	17.2	 16
529	  1	623.3	77.0	 16
530	  1	2370.3	269.5	 16
531	  1	77.8	15.6	 16
532	  1	64.3	11.8	 16
533	  1	149.3	30.1	 16
534	  1	204.3	26.1	 16
535	  1	454.3	61.5	 16
536	  1	84.8	21.7	 16
537	  1	105.0	14.6	 16
538	  1	126.5	30.0	 16
539	  1	90.5	14.7	 16
540	  1	188.8	24.9	 16
541	  1	130.8	20.1	 16
542	  1	1715.0	196.7	 16
543	  1	221.0	25.3	 16
544	  1	311.8	41.6	 16
545	  1	104.8	14.4	 16
546	  1	607.0	74.6	 16
547	  1	634.5	58.7	 16
548	  1	88.3	14.7	 16
549	  1	80.8	12.4	 16
550	  1	690.0	115.6	 16
551	  1	225.8	25.5	 16
552	  1	97.0	15.8	 16
553	  1	313.3	29.1	 16
554	  1	70.5	9.9	 16
555	  1	144.0	51.7	 16
556	  1	87.5	11.4	 16
557	  1	300.5	25.7	 16
558	  1	246.0	31.8	 16
559	  1	1475.3	167.4	 16
560	  1	7356.3	463.6	 16
561	  1	208.0	30.8	 16
562	  1	909.8	116.8	 16
563	  1	141.3	21.6	 16
564	  1	203.0	24.3	 16
565	  1	154.3	26.6	 16
566	  1	443.0	56.7	 16
567	  1	76.0	13.4	 16
568	  1	2173.0	293.7	 16
569	  1	324.5	49.3	 16
570	  1	74.0	10.3	 16
571	  1	69.0	9.3	 16
572	  1	69.3	16.7	 16
573	  1	191.0	24.7	 16
574	  1	76.8	9.9	 16
575	  1	67.0	14.9	 16
576	  1	107.8	19.4	 16
577	  1	156.3	22.8	 16
578	  1	214.3	31.7	 16
579	  1	244.5	34.0	 16
580	  1	244.0	26.4	 16
581	  1	83.0	13.6	 16
582	  1	373.8	35.4	 16
583	  1	346.0	38.9	 16
584	  1	337.0	43.3	 16
585	  1	608.0	67.6	 16
586	  1	185.0	20.7	 16
587	  1	117.3	20.9	 16
588	  1	159.3	31.3	 16
589	  1	207.3	19.7	 16
590	  1	221.0	26.3	 16
591	  1	79.0	9.9	 16
592	  1	1257.8	185.2	 16
593	  1	127.0	18.5	 16
594	  1	104.5	17.5	 16
595	  1	72.8	11.1	 16
596	  1	278.8	22.1	 16
597	  1	327.5	30.4	 16
598	  1	326.0	20.8	 16
599	  1	414.3	44.7	 16
600	  1	598.0	71.9	 16
601	  1	590.5	63.6	 16
602	  1	462.8	57.9	 16
603	  1	400.0	38.4	 16
604	  1	1862.0	204.0	 16
605	  1	75.0	14.5	 16
606	  1	183.0	28.3	 16
607	  1	400.5	57.1	 16
608	  1	531.0	70.0	 16
609	  1	11185.0	1614.0	 16
610	  1	356.3	36.0	 16
611	  1	1095.8	233.2	 16
612	  1	79.3	11.1	 16
613	  1	139.3	27.0	 16
614	  1	81.3	11.3	 16
615	  1	117.5	19.6	 16
616	  1	608.3	122.3	 16
617	  1	497.3	55.1	 16
618	  1	317.3	40.7	 16
619	  1	124.3	20.6	 16
620	  1	185.5	18.9	 16
621	  1	163.3	24.1	 16
622	  1	172.5	25.8	 16
623	  1	369.8	49.3	 16
624	  1	151.0	28.2	 16
625	  1	185.0	19.5	 16
626	  1	729.8	91.6	 16
627	  1	725.8	114.6	 16
628	  1	653.8	79.0	 16
629	  1	232.5	34.5	 16
630	  1	273.3	22.5	 16
631	  1	1943.0	354.2	 16
632	  1	2561.5	412.4	 16
633	  1	3031.5	215.8	 16
634	  1	98.3	13.8	 16
635	  1	94.5	10.7	 16
636	  1	107.5	22.1	 16
637	  1	247.5	44.1	 16
638	  1	119.0	13.4	 16
639	  1	422.5	67.7	 16
640	  1	130.8	19.7	 16
641	  1	258.0	24.8	 16
642	  1	101.0	20.6	 16
643	  1	1060.8	165.2	 16
644	  1	2755.8	482.1	 16
645	  1	95.8	22.3	 16
646	  1	86.3	14.7	 16
647	  1	135.3	20.0	 20
648	  1	106.3	15.4	 16
649	  1	171.5	22.1	 16
650	  1	152.5	23.9	 16
651	  1	85.3	21.7	 16
652	  1	1006.0	130.6	 16
653	  1	154.8	24.4	 16
654	  1	126.3	17.3	 16
655	  1	730.8	112.8	 16
656	  1	78.3	14.8	 16
657	  1	495.0	60.9	 16
658	  1	77.0	13.7	 16
659	  1	544.3	60.9	 16
660	  1	125.0	23.3	 16
661	  1	84.0	15.6	 16
662	  1	69.3	10.2	 16
663	  1	662.5	104.4	 16
664	  1	480.5	75.6	 16
665	  1	172.0	85.8	 16
666	  1	107.3	27.5	 16
667	  1	2602.5	160.2	 16
668	  1	322.5	28.9	 16
669	  1	316.3	31.8	 16
670	  1	128.5	23.4	 16
671	  1	99.8	11.0	 16
672	  1	256.5	26.3	 16
673	  1	298.8	39.1	 16
674	  1	197.3	31.7	 16
675	  1	514.0	88.7	 16
676	  1	465.3	53.7	 16
677	  1	113.8	17.1	 16
678	  1	133.3	18.7	 16
679	  1	141.3	18.5	 16
680	  1	3335.0	509.6	 16
681	  1	89.8	15.0	 16
682	  1	485.5	71.5	 16
683	  1	176.0	29.5	 16
684	  1	1005.0	109.4	 16
685	  1	178.0	19.3	 16
686	  1	266.3	22.9	 16
687	  1	1571.3	199.9	 16
688	  1	134.0	29.0	 16
689	  1	266.8	39.7	 16
690	  1	200.8	27.0	 16
691	  1	3184.5	278.2	 16
692	  1	2734.5	242.0	 16
693	  1	116.8	22.9	 16
694	  1	179.8	22.6	 16
695	  1	105.0	12.5	 16
696	  1	88.3	15.3	 16
697	  1	103.0	15.9	 16
698	  1	101.3	19.7	 16
699	  1	196.8	46.7	 16
700	  1	92.5	13.8	 16
701	  1	112.3	23.6	 16
702	  1	238.0	22.0	 16
703	  1	276.3	28.7	 16
704	  1	243.5	25.9	 16
705	  1	184.5	16.7	 16
706	  1	95.8	16.3	 16
707	  1	86.8	14.9	 16
708	  1	8867.3	1401.5	 16
709	  1	146.3	16.6	 16
710	  1	8558.3	1137.3	 16
711	  1	160.5	19.1	 16
  0	  2	154.8	22.1	 16
  1	  2	9962.3	780.0	 16
  2	  2	158.5	17.7	 16
  3	  2	10325.8	1595.5	 16
  4	  2	110.5	19.6	 16
  5	  2	306.8	33.7	 16
  6	  2	157.5	20.5	 16
  7	  2	89.3	11.8	 16
  8	  2	192.8	23.5	 16
  9	  2	100.8	8.6	 16
 10	  2	114.5	17.7	 16
 11	  2	150.5	24.7	 16
 12	  2	91.3	13.2	 16
 13	  2	136.0	19.4	 16
 14	  2	309.3	36.1	 16
 15	  2	318.0	37.2	 16
 16	  2	375.5	35.8	 16
 17	  2	148.0	23.1	 16
 18	  2	98.3	10.8	 16
 19	  2	422.5	52.6	 16
 20	  2	105.8	17.8	 16
 21	  2	89.8	16.2	 16
 22	  2	131.5	18.8	 16
 23	  2	149.3	25.5	 16
 24	  2	471.5	56.0	 16
 25	  2	1202.8	55.8	 16
 26	  2	102.5	14.5	 16
 27	  2	339.5	27.3	 16
 28	  2	339.3	23.3	 16
 29	  2	281.8	35.1	 16
 30	  2	172.8	27.9	 16
 31	  2	77.3	10.2	 16
 32	  2	177.3	21.9	 16
 33	  2	98.3	17.1	 16
 34	  2	513.3	54.6	 16
 35	  2	137.3	17.7	 16
 36	  2	474.3	58.6	 16
 37	  2	111.5	23.0	 16
 38	  2	115.0	18.3	 16
 39	  2	213.3	22.1	 16
 40	  2	257.8	23.1	 16
 41	  2	154.3	17.7	 16
 42	  2	341.0	42.2	 16
 43	  2	177.3	23.5	 16
 44	  2	132.3	20.6	 16
 45	  2	445.0	63.5	 16
 46	  2	111.5	19.6	 16
 47	  2	334.8	48.0	 16
 48	  2	131.8	19.5	 16
 49	  2	238.0	36.0	 16
 50	  2	211.5	33.4	 16
 51	  2	212.0	25.2	 16
 52	  2	247.5	35.8	 16
 53	  2	109.8	24.2	 16
 54	  2	90.5	16.6	 16
 55	  2	104.3	18.0	 16
 56	  2	244.3	39.6	 16
 57	  2	349.3	41.4	 16
 58	  2	569.5	70.0	 16
 59	  2	89.8	19.6	 16
 60	  2	122.3	17.2	 16
 61	  2	81.8	10.4	 16
 62	  2	104.5	14.1	 16
 63	  2	123.3	24.9	 16
 64	  2	164.3	23.2	 16
 65	  2	215.8	32.1	 16
 66	  2	207.0	21.6	 16
 67	  2	143.3	26.4	 16
 68	  2	280.5	31.5	 16
 69	  2	79.3	14.3	 16
 70	  2	116.5	17.6	 16
 71	  2	160.8	29.1	 16
 72	  2	84.3	11.5	 16
 73	  2	236.3	39.9	 16
 74	  2	197.8	27.4	 16
 75	  2	80.8	12.3	 16
 76	  2	106.5	18.1	 16
 77	  2	120.8	14.1	 16
 78	  2	113.8	17.1	 16
 79	  2	76.3	9.3	 16
 80	  2	85.0	15.4	 16
 81	  2	175.3	24.8	 16
 82	  2	338.0	52.4	 20
 83	  2	149.3	18.3	 16
 84	  2	140.5	22.1	 16
 85	  2	73.0	12.4	 16
 86	  2	95.0	17.7	 16
 87	  2	298.8	44.6	 16
 88	  2	107.8	12.7	 16
 89	  2	428.8	51.0	 16
 90	  2	142.3	33.1	 16
 91	  2	123.8	20.7	 16
 92	  2	96.3	14.5	 16
 93	  2	122.5	16.5	 16
 94	  2	152.0	17.4	 16
 95	  2	257.0	40.0	 16
 96	  2	78.3	7.1	 16
 97	  2	105.3	14.7	 16
 98	  2	116.3	20.4	 16
 99	  2	335.8	34.0	 16
100	  2	367.0	44.0	 16
101	  2	69.3	10.6	 16
102	  2	76.3	11.1	 16
103	  2	100.0	22.7	 16
104	  2	92.0	13.6	 16
105	  2	671.5	95.3	 16
106	  2	102.0	17.2	 16
107	  2	102.5	20.5	 16
108	  2	99.0	11.9	 16
109	  2	73.8	14.9	 16
110	  2	139.0	19.0	 16
111	  2	213.8	32.1	 16
112	  2	221.0	36.0	 16
113	  2	121.8	22.3	 16
114	  2	151.5	18.5	 16
115	  2	128.5	18.8	 16
116	  2	163.0	24.9	 16
117	  2	129.0	27.7	 16
118	  2	96.3	13.8	 16
119	  2	322.5	43.9	 16
120	  2	155.0	28.2	 16
121	  2	139.8	26.5	 16
122	  2	69.8	10.5	 16
123	  2	97.8	14.8	 16
124	  2	117.5	18.7	 16
125	  2	196.8	32.5	 16
126	  2	155.0	17.3	 16
127	  2	315.0	30.8	 16
128	  2	331.3	48.1	 16
129	  2	67.3	10.4	 16
130	  2	303.3	50.9	 16
131	  2	148.0	30.3	 16
132	  2	266.8	31.3	 16
133	  2	321.8	36.0	 16
134	  2	202.8	28.5	 16
135	  2	103.3	18.7	 16
136	  2	119.3	19.8	 16
137	  2	82.5	10.6	 16
138	  2	92.3	32.7	 16
139	  2	108.8	17.2	 16
140	  2	77.8	10.4	 16
141	  2	69.8	20.1	 16
142	  2	419.5	71.2	 16
143	  2	156.0	29.3	 16
144	  2	388.5	49.4	 16
145	  2	100.3	14.1	 16
146	  2	133.0	21.4	 16
147	  2	101.8	17.3	 16
148	  2	392.0	48.9	 16
149	  2	127.3	18.2	 16
150	  2	80.5	11.9	 16
151	  2	115.5	18.3	 16
152	  2	134.3	12.1	 16
153	  2	131.8	37.9	 16
154	  2	87.5	48.9	 16
155	  2	127.3	17.0	 16
156	  2	266.5	33.7	 16
157	  2	245.0	34.7	 16
158	  2	93.0	22.5	 16
159	  2	161.0	20.8	 16
160	  2	501.5	79.0	 16
161	  2	329.8	33.4	 16
162	  2	82.0	9.8	 16
163	  2	182.3	34.6	 16
164	  2	197.3	24.7	 16
165	  2	127.8	21.8	 16
166	  2	179.8	27.3	 16
167	  2	340.0	58.9	 16
168	  2	77.5	17.0	 16
169	  2	65.5	12.0	 16
170	  2	180.5	35.2	 16
171	  2	82.8	16.6	 16
172	  2	176.3	36.1	 16
173	  2	130.0	20.6	 16
174	  2	119.3	30.5	 16
175	  2	764.3	142.4	 16
176	  2	184.3	20.3	 16
177	  2	76.3	15.5	 16
178	  2	197.5	18.8	 16
179	  2	171.3	21.6	 16
180	  2	84.8	12.0	 16
181	  2	93.5	17.1	 16
182	  2	88.5	15.0	 16
183	  2	102.0	19.6	 16
184	  2	113.3	23.3	 16
185	  2	74.0	12.5	 16
186	  2	91.8	15.7	 16
187	  2	181.3	23.4	 16
188	  2	102.8	26.5	 16
189	  2	198.8	34.1	 16
190	  2	194.5	27.3	 16
191	  2	93.8	18.1	 16
192	  2	238.8	38.3	 16
193	  2	617.5	108.8	 16
194	  2	121.5	24.8	 16
195	  2	239.5	31.5	 16
196	  2	145.8	24.0	 16
197	  2	95.8	17.1	 16
198	  2	84.3	13.7	 16
199	  2	243.5	33.2	 16
200	  2	151.3	21.4	 16
201	  2	60.5	8.4	 16
202	  2	238.5	38.4	 16
203	  2	176.8	34.1	 16
204	  2	64.8	10.6	 16
205	  2	97.8	16.8	 16
206	  2	211.5	26.2	 16
207	  2	145.5	21.6	 16
208	  2	61.5	10.3	 16
209	  2	83.5	15.2	 16
210	  2	91.8	19.2	 16
211	  2	84.3	13.6	 16
212	  2	85.0	20.9	 16
213	  2	78.5	17.0	 16
214	  2	133.3	28.8	 16
215	  2	117.5	27.2	 16
216	  2	95.3	15.6	 16
217	  2	307.5	41.8	 16
218	  2	379.5	135.9	 16
219	  2	141.8	24.6	 16
220	  2	68.0	9.3	 16
221	  2	168.8	31.8	 16
222	  2	81.8	15.1	 16
223	  2	184.5	28.8	 16
224	  2	74.3	13.4	 20
225	  2	62.3	10.9	 16
226	  2	119.0	17.5	 16
227	  2	124.5	18.5	 16
228	  2	110.0	17.7	 16
229	  2	85.0	14.9	 16
230	  2	335.0	46.4	 16
231	  2	93.0	19.3	 16
232	  2	76.3	17.4	 16
233	  2	101.5	17.9	 16
234	  2	80.8	18.9	 16
235	  2	56.3	15.8	 16
236	  2	199.0	40.4	 16
237	  2	50.5	13.8	 16
238	  2	75.5	14.2	 16
239	  2	49.5	11.5	 16
240	  2	124.0	20.4	 16
241	  2	104.3	14.2	 16
242	  2	82.3	15.7	 16
243	  2	123.3	17.2	 16
244	  2	188.3	27.7	 16
245	  2	202.8	34.9	 16
246	  2	225.5	38.1	 16
247	  2	254.8	37.7	 16
248	  2	70.5	11.4	 16
249	  2	88.3	18.8	 16
250	  2	96.3	14.3	 16
251	  2	73.8	9.8	 16
252	  2	83.5	18.8	 16
253	  2	88.0	11.6	 16
254	  2	62.8	16.0	 16
255	  2	74.3	15.2	 16
256	  2	143.0	33.4	 16
257	  2	72.5	12.0	 16
258	  2	122.5	22.2	 16
259	  2	111.0	19.3	 16
260	  2	78.0	12.5	 16
261	  2	135.0	25.3	 16
262	  2	81.5	17.5	 16
263	  2	109.5	17.0	 16
264	  2	221.5	26.4	 16
265	  2	93.0	18.0	 16
266	  2	73.8	20.3	 16
267	  2	497.3	40.4	 16
268	  2	447.0	49.3	 16
269	  2	65.5	12.0	 16
270	  2	96.5	17.1	 16
271	  2	71.5	11.6	 16
272	  2	72.8	12.9	 16
273	  2	413.3	45.9	 16
274	  2	73.8	17.0	 16
275	  2	193.0	34.5	 16
276	  2	498.8	55.5	 16
277	  2	113.5	11.9	 16
278	  2	132.0	29.6	 16
279	  2	635.0	94.1	 16
280	  2	88.8	57.2	 16
281	  2	89.0	15.8	 16
282	  2	109.3	17.5	 16
283	  2	198.0	26.1	 16
284	  2	91.3	15.5	 16
285	  2	198.8	30.0	 16
286	  2	210.5	23.7	 16
287	  2	138.0	19.3	 16
288	  2	85.3	19.0	 16
289	  2	197.0	51.2	 16
290	  2	182.5	34.2	 16
291	  2	96.3	17.2	 16
292	  2	674.3	78.9	 16
293	  2	381.8	33.8	 16
294	  2	128.5	26.1	 16
295	  2	131.0	24.0	 16
296	  2	134.5	116.3	 16
297	  2	92.5	16.3	 16
298	  2	240.0	27.5	 16
299	  2	93.5	17.3	 16
300	  2	71.5	17.9	 16
301	  2	78.0	10.0	 16
302	  2	106.3	27.1	 16
303	  2	243.0	37.5	 16
304	  2	71.5	13.9	 16
305	  2	126.3	22.7	 16
306	  2	129.0	21.8	 16
307	  2	89.0	13.5	 16
308	  2	93.5	12.6	 16
309	  2	168.5	23.9	 16
310	  2	86.3	20.1	 16
311	  2	202.8	27.3	 16
312	  2	89.5	17.6	 16
313	  2	154.8	20.4	 16
314	  2	166.8	20.7	 16
315	  2	124.8	15.4	 16
316	  2	75.5	13.1	 16
317	  2	179.5	13.3	 16
318	  2	96.3	20.5	 16
319	  2	156.8	19.9	 16
320	  2	154.5	25.9	 16
321	  2	229.3	35.6	 16
322	  2	91.0	11.8	 16
323	  2	98.3	16.5	 16
324	  2	101.3	19.3	 16
325	  2	83.3	16.0	 16
326	  2	95.0	15.7	 16
327	  2	81.0	14.9	 16
328	  2	133.8	22.2	 16
329	  2	1309.8	139.6	 16
330	  2	192.5	26.4	 16
331	  2	202.8	23.4	 16
332	  2	76.3	16.6	 16
333	  2	226.3	24.4	 16
334	  2	171.5	20.9	 16
335	  2	299.8	39.8	 16
336	  2	153.3	20.1	 16
337	  2	211.5	32.1	 16
338	  2	84.3	14.8	 16
339	  2	74.8	12.2	 16
340	  2	85.5	15.0	 16
341	  2	95.3	19.8	 16
342	  2	197.3	21.4	 16
343	  2	184.8	65.9	 16
344	  2	138.0	20.8	 16
345	  2	592.3	116.5	 16
346	  2	152.0	23.2	 16
347	  2	441.8	76.3	 16
348	  2	873.3	70.4	 16
349	  2	839.3	101.9	 16
350	  2	89.3	13.1	 16
351	  2	62.0	10.7	 16
352	  2	192.5	31.8	 16
353	  2	82.5	10.9	 16
354	  2	4336.5	620.6	 16
355	  2	389.5	46.9	 16
356	  2	413.0	59.2	 16
357	  2	192.3	30.4	 16
358	  2	75.3	9.3	 16
359	  2	110.0	13.5	 16
360	  2	76.3	14.2	 16
361	  2	84.3	15.3	 16
362	  2	68.3	9.0	 16
363	  2	107.0	17.9	 16
364	  2	64.3	10.7	 16
365	  2	71.3	10.6	 16
366	  2	74.3	14.6	 20
367	  2	73.3	11.4	 16
368	  2	101.3	18.3	 16
369	  2	84.8	13.8	 16
370	  2	86.5	11.2	 16
371	  2	3376.3	731.7	 16
372	  2	105.3	17.1	 16
373	  2	195.3	34.7	 16
374	  2	124.0	20.3	 16
375	  2	73.0	12.3	 16
376	  2	211.0	37.2	 16
377	  2	88.0	17.5	 16
378	  2	165.0	28.8	 16
379	  2	152.8	27.7	 16
380	  2	105.0	17.0	 16
381	  2	129.0	19.2	 16
382	  2	268.3	30.7	 16
383	  2	257.8	29.8	 16
384	  2	154.8	27.8	 16
385	  2	98.5	16.9	 16
386	  2	64.0	12.7	 16
387	  2	77.8	15.8	 16
388	  2	62.5	12.4	 16
389	  2	67.3	11.1	 16
390	  2	97.5	17.5	 16
391	  2	121.3	14.8	 16
392	  2	83.8	13.7	 16
393	  2	79.5	13.7	 16
394	  2	86.3	13.6	 16
395	  2	189.3	35.9	 16
396	  2	386.3	49.6	 16
397	  2	78.0	10.3	 16
398	  2	193.0	24.1	 16
399	  2	124.3	17.9	 16
400	  2	199.8	27.8	 16
401	  2	82.5	18.6	 16
402	  2	208.3	25.7	 16
403	  2	200.3	20.9	 16
404	  2	981.5	95.6	 16
405	  2	1527.5	190.2	 16
406	  2	209.0	29.1	 16
407	  2	151.8	26.0	 16
408	  2	176.5	13.6	 16
409	  2	96.0	15.8	 16
410	  2	157.8	32.3	 16
411	  2	129.3	15.3	 16
412	  2	520.0	61.6	 16
413	  2	283.5	40.8	 16
414	  2	539.0	92.6	 16
415	  2	127.0	16.5	 16
416	  2	96.8	17.2	 16
417	  2	125.5	24.8	 16
418	  2	206.3	24.7	 16
419	  2	107.3	18.8	 16
420	  2	231.5	31.6	 16
421	  2	154.8	24.6	 16
422	  2	262.8	27.7	 16
423	  2	627.3	63.2	 16
424	  2	71.5	11.5	 16
425	  2	123.0	14.8	 16
426	  2	92.8	23.0	 16
427	  2	66.3	10.9	 16
428	  2	90.0	16.1	 16
429	  2	99.5	21.3	 16
430	  2	67.3	11.8	 16
431	  2	164.3	22.3	 16
432	  2	192.3	25.7	 16
433	  2	206.8	25.0	 16
434	  2	258.5	40.1	 16
435	  2	68.3	10.4	 16
436	  2	65.3	14.5	 16
437	  2	55.5	10.6	 16
438	  2	72.0	14.1	 16
439	  2	144.5	18.6	 16
440	  2	59.5	8.8	 16
441	  2	219.3	29.9	 16
442	  2	127.5	15.4	 16
443	  2	81.3	12.5	 16
444	  2	85.3	9.5	 16
445	  2	87.8	15.3	 16
446	  2	95.5	13.8	 16
447	  2	61.8	9.9	 16
448	  2	67.0	11.9	 16
449	  2	70.3	11.0	 16
450	  2	78.0	14.2	 16
451	  2	216.5	22.6	 16
452	  2	474.3	57.1	 16
453	  2	547.0	40.9	 16
454	  2	351.8	38.6	 16
455	  2	93.3	10.5	 16
456	  2	868.8	104.4	 16
457	  2	1297.8	135.0	 16
458	  2	333.3	89.3	 16
459	  2	80.5	14.1	 16
460	  2	557.8	135.6	 16
461	  2	251.5	24.1	 16
462	  2	68.8	8.3	 16
463	  2	80.5	13.3	 16
464	  2	280.8	41.2	 16
465	  2	881.0	54.0	 16
466	  2	209.3	22.1	 16
467	  2	540.5	71.5	 16
468	  2	227.0	30.0	 16
469	  2	98.8	11.7	 16
470	  2	329.5	41.1	 16
471	  2	78.3	10.9	 16
472	  2	58.8	10.1	 16
473	  2	356.3	63.6	 16
474	  2	51.0	8.7	 16
475	  2	79.5	15.4	 16
476	  2	43.5	7.8	 16
477	  2	167.3	18.5	 16
478	  2	91.5	18.7	 16
479	  2	93.3	13.5	 16
480	  2	73.5	16.7	 16
481	  2	79.0	13.8	 16
482	  2	272.3	56.1	 16
483	  2	85.0	17.3	 16
484	  2	135.0	19.8	 16
485	  2	177.0	29.9	 16
486	  2	79.8	24.0	 16
487	  2	80.5	14.5	 16
488	  2	56.0	9.5	 16
489	  2	67.3	15.6	 16
490	  2	164.0	24.7	 16
491	  2	90.5	10.6	 16
492	  2	82.0	12.7	 16
493	  2	288.3	42.5	 16
494	  2	100.8	16.1	 16
495	  2	71.5	13.5	 16
496	  2	155.5	18.2	 16
497	  2	504.0	42.5	 16
498	  2	63.0	12.2	 16
499	  2	76.3	13.8	 16
500	  2	103.5	26.2	 16
501	  2	167.5	21.4	 16
502	  2	192.3	39.2	 16
503	  2	91.0	18.3	 16
504	  2	68.8	11.5	 16
505	  2	69.0	10.1	 16
506	  2	304.5	37.3	 16
507	  2	173.5	26.6	 16
508	  2	126.5	13.1	 16
509	  2	231.8	32.2	 20
510	  2	233.3	36.3	 16
511	  2	248.0	26.4	 16
512	  2	78.3	17.3	 16
513	  2	880.0	142.3	 16
514	  2	123.0	20.9	 16
515	  2	124.0	28.4	 16
516	  2	87.5	26.7	 16
517	  2	159.3	25.4	 16
518	  2	471.8	33.2	 16
519	  2	457.5	62.1	 16
520	  2	96.8	15.8	 16
521	  2	68.0	12.8	 16
522	  2	356.0	42.9	 16
523	  2	100.0	20.0	 16
524	  2	1639.8	259.3	 16
525	  2	443.3	40.1	 16
526	  2	379.3	35.6	 16
527	  2	119.8	29.7	 16
528	  2	142.5	22.2	 16
529	  2	240.3	33.1	 16
530	  2	297.5	49.5	 16
531	  2	68.3	11.0	 16
532	  2	69.3	13.5	 16
533	  2	229.5	30.1	 16
534	  2	199.5	29.2	 16
535	  2	105.5	17.2	 16
536	  2	71.8	16.3	 16
537	  2	102.5	16.7	 16
538	  2	107.0	18.6	 16
539	  2	78.5	10.3	 16
540	  2	118.3	20.2	 16
541	  2	81.3	10.7	 16
542	  2	298.3	50.0	 16
543	  2	590.8	42.6	 16
544	  2	305.8	40.2	 16
545	  2	284.5	44.4	 16
546	  2	106.0	26.4	 16
547	  2	204.0	21.3	 16
548	  2	69.0	18.0	 16
549	  2	77.0	11.7	 16
550	  2	101.8	18.4	 16
551	  2	99.5	14.4	 16
552	  2	82.3	11.9	 16
553	  2	98.8	17.7	 16
554	  2	68.5	9.5	 16
555	  2	76.5	14.1	 16
556	  2	122.3	24.1	 16
557	  2	265.3	29.1	 16
558	  2	217.8	28.2	 16
559	  2	485.0	116.5	 16
560	  2	6675.5	434.2	 16
561	  2	199.3	21.3	 16
562	  2	356.3	41.5	 16
563	  2	131.5	15.2	 16
564	  2	185.5	30.5	 16
565	  2	178.0	23.2	 16
566	  2	185.8	26.1	 16
567	  2	69.0	10.7	 16
568	  2	218.8	30.7	 16
569	  2	131.3	22.5	 16
570	  2	67.3	11.4	 16
571	  2	68.0	9.1	 16
572	  2	64.0	14.0	 16
573	  2	168.0	20.1	 16
574	  2	77.3	12.2	 16
575	  2	57.0	7.4	 16
576	  2	80.3	15.5	 16
577	  2	72.0	13.5	 16
578	  2	139.5	23.2	 16
579	  2	137.5	21.0	 16
580	  2	262.3	28.9	 16
581	  2	106.8	15.5	 16
582	  2	280.3	40.4	 16
583	  2	460.8	52.8	 16
584	  2	161.5	18.7	 16
585	  2	197.5	33.1	 16
586	  2	144.8	25.9	 16
587	  2	131.8	20.8	 16
588	  2	127.8	22.0	 16
589	  2	278.5	28.5	 16
590	  2	280.5	50.5	 16
591	  2	74.3	13.2	 16
592	  2	137.3	21.0	 16
593	  2	62.3	11.4	 16
594	  2	82.3	13.3	 16
595	  2	65.3	12.3	 16
596	  2	222.3	31.7	 16
597	  2	295.8	46.9	 16
598	  2	364.3	36.4	 16
599	  2	398.0	29.9	 16
600	  2	356.8	46.1	 16
601	  2	417.0	30.7	 16
602	  2	285.5	38.4	 16
603	  2	165.5	24.3	 16
604	  2	183.5	30.9	 16
605	  2	80.8	13.3	 16
606	  2	68.0	13.7	 16
607	  2	88.3	13.9	 16
608	  2	166.3	21.0	 16
609	  2	2425.3	412.0	 16
610	  2	200.5	23.6	 16
611	  2	100.8	22.5	 16
612	  2	107.8	21.1	 16
613	  2	64.5	10.8	 16
614	  2	124.8	21.1	 16
615	  2	72.0	20.5	 16
616	  2	101.8	20.7	 16
617	  2	115.5	20.1	 16
618	  2	94.3	14.8	 16
619	  2	75.0	14.2	 16
620	  2	150.5	32.3	 16
621	  2	96.8	23.6	 16
622	  2	160.3	22.0	 16
623	  2	126.3	19.9	 16
624	  2	118.5	10.5	 16
625	  2	116.5	16.1	 16
626	  2	305.8	45.4	 16
627	  2	202.3	30.6	 16
628	  2	1529.5	137.1	 16
629	  2	152.3	23.1	 16
630	  2	161.5	23.3	 16
631	  2	133.0	20.4	 16
632	  2	309.5	60.5	 16
633	  2	365.3	70.5	 16
634	  2	83.8	13.6	 16
635	  2	85.8	16.6	 16
636	  2	111.5	18.0	 16
637	  2	278.0	43.5	 16
638	  2	102.3	15.5	 16
639	  2	96.5	15.7	 16
640	  2	198.0	25.3	 16
641	  2	203.5	26.0	 16
642	  2	119.3	19.2	 16
643	  2	191.8	39.2	 16
644	  2	585.8	64.5	 16
645	  2	82.3	14.9	 16
646	  2	80.0	14.4	 16
647	  2	160.5	24.8	 16
648	  2	88.0	14.8	 16
649	  2	76.3	11.4	 16
650	  2	141.0	28.1	 16
651	  2	55.5	8.9	 20
652	  2	140.8	24.4	 16
653	  2	102.3	15.1	 16
654	  2	90.3	14.4	 16
655	  2	190.0	35.1	 16
656	  2	63.3	11.6	 16
657	  2	299.5	45.5	 16
658	  2	74.5	15.5	 16
659	  2	163.5	28.1	 16
660	  2	94.3	20.5	 16
661	  2	88.0	16.7	 16
662	  2	65.3	11.2	 16
663	  2	183.0	23.6	 16
664	  2	143.5	22.3	 16
665	  2	67.8	11.5	 16
666	  2	95.8	23.7	 16
667	  2	1043.8	98.8	 16
668	  2	120.8	20.0	 16
669	  2	138.0	18.4	 16
670	  2	105.5	13.9	 16
671	  2	116.5	16.2	 16
672	  2	169.5	27.2	 16
673	  2	178.3	19.8	 16
674	  2	450.3	53.5	 16
675	  2	155.3	19.6	 16
676	  2	291.0	31.0	 16
677	  2	151.3	16.5	 16
678	  2	145.0	20.1	 16
679	  2	239.0	30.2	 16
680	  2	751.5	140.9	 16
681	  2	78.5	12.3	 16
682	  2	108.8	21.7	 16
683	  2	141.5	22.7	 16
684	  2	561.5	84.2	 16
685	  2	107.5	18.4	 16
686	  2	457.3	52.5	 16
687	  2	234.3	24.1	 16
688	  2	98.5	11.5	 16
689	  2	90.8	10.1	 16
690	  2	73.8	12.7	 16
691	  2	514.0	70.9	 16
692	  2	740.3	71.6	 16
693	  2	74.5	9.8	 16
694	  2	91.0	14.0	 16
695	  2	99.0	14.0	 16
696	  2	66.8	14.5	 16
697	  2	94.3	20.4	 16
698	  2	84.0	13.4	 16
699	  2	73.3	8.9	 16
700	  2	74.0	11.7	 16
701	  2	72.0	10.9	 16
702	  2	333.0	39.2	 16
703	  2	247.0	29.2	 16
704	  2	304.5	44.4	 16
705	  2	211.3	31.5	 16
706	  2	87.0	14.8	 16
707	  2	80.0	14.2	 16
708	  2	133.8	18.0	 16
709	  2	8420.8	933.1	 16
710	  2	182.3	28.7	 16
711	  2	9493.0	1120.5	 16
  0	  3	10231.3	710.5	 16
  1	  3	145.8	9.5	 16
  2	  3	9848.8	593.7	 16
  3	  3	161.0	16.8	 16
  4	  3	79.3	12.2	 16
  5	  3	190.3	25.6	 16
  6	  3	94.5	9.4	 16
  7	  3	334.5	40.2	 16
  8	  3	111.0	14.8	 16
  9	  3	628.0	93.4	 16
 10	  3	394.0	63.3	 16
 11	  3	661.0	48.3	 16
 12	  3	200.5	31.8	 16
 13	  3	188.3	19.5	 16
 14	  3	239.5	24.7	 16
 15	  3	452.5	566.7	 16
 16	  3	750.3	81.8	 16
 17	  3	964.0	105.8	 16
 18	  3	1038.8	136.4	 16
 19	  3	255.0	21.4	 16
 20	  3	151.3	24.7	 16
 21	  3	110.5	15.2	 16
 22	  3	244.0	41.8	 16
 23	  3	6014.0	570.4	 16
 24	  3	122.8	17.8	 16
 25	  3	209.3	20.4	 16
 26	  3	188.5	25.4	 16
 27	  3	164.5	19.4	 16
 28	  3	171.0	20.4	 16
 29	  3	151.0	15.4	 16
 30	  3	169.3	27.7	 16
 31	  3	210.0	26.9	 16
 32	  3	118.3	29.9	 16
 33	  3	576.3	59.9	 12
 34	  3	228.5	32.5	 16
 35	  3	162.8	25.2	 16
 36	  3	349.5	35.7	 16
 37	  3	1550.0	125.1	 16
 38	  3	185.0	20.8	 16
 39	  3	93.5	13.9	 16
 40	  3	188.0	26.5	 16
 41	  3	1334.3	116.8	 16
 42	  3	1595.8	154.5	 16
 43	  3	123.3	18.3	 16
 44	  3	343.3	40.6	 16
 45	  3	117.3	14.6	 16
 46	  3	165.0	19.0	 16
 47	  3	622.5	44.6	 16
 48	  3	76.0	26.5	 16
 49	  3	128.3	15.4	 16
 50	  3	123.5	18.7	 16
 51	  3	305.3	48.1	 16
 52	  3	957.5	126.8	 16
 53	  3	99.0	11.8	 16
 54	  3	113.8	21.0	 16
 55	  3	208.0	39.1	 16
 56	  3	385.8	43.9	 16
 57	  3	521.8	57.6	 16
 58	  3	114.8	16.0	 16
 59	  3	303.5	18.5	 16
 60	  3	148.0	16.5	 16
 61	  3	234.0	34.3	 16
 62	  3	1322.3	138.7	 16
 63	  3	195.3	32.7	 16
 64	  3	8634.5	891.5	 16
 65	  3	229.0	24.0	 16
 66	  3	138.0	25.3	 16
 67	  3	257.8	28.0	 16
 68	  3	87.5	11.3	 16
 69	  3	112.3	19.0	 16
 70	  3	279.5	23.7	 16
 71	  3	227.0	23.4	 16
 72	  3	188.0	32.3	 16
 73	  3	704.0	52.2	 16
 74	  3	164.5	25.2	 16
 75	  3	99.5	18.6	 16
 76	  3	88.5	12.1	 16
 77	  3	121.0	20.5	 16
 78	  3	225.8	42.5	 16
 79	  3	291.5	33.3	 16
 80	  3	97.0	16.5	 16
 81	  3	135.8	19.5	 16
 82	  3	98.0	14.7	 16
 83	  3	784.8	71.7	 16
 84	  3	338.3	33.8	 16
 85	  3	282.8	42.5	 16
 86	  3	88.3	14.9	 20
 87	  3	139.3	17.8	 16
 88	  3	397.0	32.6	 16
 89	  3	285.3	28.9	 16
 90	  3	183.5	34.4	 16
 91	  3	1025.0	72.2	 16
 92	  3	1108.8	79.6	 16
 93	  3	1150.0	105.2	 16
 94	  3	1176.5	109.8	 16
 95	  3	1154.5	149.3	 16
 96	  3	819.8	111.4	 16
 97	  3	488.3	69.0	 16
 98	  3	324.3	52.9	 16
 99	  3	85.3	16.6	 16
100	  3	149.0	17.6	 16
101	  3	297.3	51.2	 16
102	  3	92.3	11.8	 16
103	  3	879.0	134.0	 16
104	  3	181.3	18.5	 16
105	  3	99.0	16.6	 16
106	  3	169.0	26.4	 16
107	  3	342.8	32.7	 16
108	  3	120.8	22.0	 16
109	  3	189.0	26.7	 16
110	  3	250.8	68.4	 16
111	  3	255.0	31.1	 16
112	  3	162.8	15.1	 16
113	  3	640.3	76.2	 16
114	  3	173.0	22.7	 16
115	  3	167.8	36.1	 16
116	  3	218.0	22.3	 16
117	  3	155.8	25.0	 16
118	  3	272.0	49.5	 16
119	  3	446.0	48.2	 16
120	  3	179.0	23.2	 16
121	  3	430.0	53.2	 16
122	  3	91.5	17.8	 12
123	  3	68.0	9.5	 16
124	  3	75.5	13.6	 16
125	  3	115.5	18.3	 16
126	  3	165.3	27.9	 16
127	  3	91.0	13.5	 16
128	  3	94.3	17.9	 16
129	  3	103.0	20.1	 16
130	  3	904.3	172.3	 16
131	  3	328.3	28.9	 16
132	  3	547.0	80.3	 16
133	  3	259.5	20.2	 16
134	  3	314.0	51.0	 16
135	  3	380.5	52.7	 16
136	  3	3185.5	459.4	 16
137	  3	136.0	26.1	 16
138	  3	626.3	74.2	 16
139	  3	1971.8	257.7	 16
140	  3	159.5	28.3	 16
141	  3	160.3	26.1	 16
142	  3	1439.3	169.2	 16
143	  3	610.5	110.7	 16
144	  3	86.5	18.8	 16
145	  3	103.3	20.3	 16
146	  3	7392.3	919.2	 16
147	  3	1114.5	127.1	 16
148	  3	286.0	43.1	 16
149	  3	230.5	30.3	 16
150	  3	97.0	14.9	 16
151	  3	560.3	74.6	 16
152	  3	543.8	56.7	 16
153	  3	255.0	32.1	 16
154	  3	83.3	10.6	 16
155	  3	2450.3	243.7	 16
156	  3	123.3	16.7	 16
157	  3	229.3	33.4	 16
158	  3	111.3	16.0	 16
159	  3	727.0	119.8	 16
160	  3	211.8	49.5	 16
161	  3	605.3	101.9	 16
162	  3	8501.3	1106.3	 16
163	  3	1191.5	161.5	 16
164	  3	323.5	53.8	 16
165	  3	341.5	53.8	 16
166	  3	188.0	27.1	 16
167	  3	230.3	24.4	 16
168	  3	1835.8	247.4	 16
169	  3	95.0	18.5	 16
170	  3	121.5	21.4	 16
171	  3	68.3	11.8	 16
172	  3	339.3	41.0	 16
173	  3	65.3	11.4	 16
174	  3	191.0	25.7	 16
175	  3	66.3	9.8	 16
176	  3	4261.5	477.4	 16
177	  3	81.5	16.0	 16
178	  3	71.3	10.6	 16
179	  3	196.8	18.4	 16
180	  3	225.3	23.1	 16
181	  3	74.8	12.8	 16
182	  3	102.8	18.8	 16
183	  3	118.8	21.7	 16
184	  3	208.8	26.7	 16
185	  3	204.3	31.2	 16
186	  3	74.0	11.8	 16
187	  3	85.0	14.4	 16
188	  3	97.0	21.0	 16
189	  3	203.3	27.7	 16
190	  3	150.3	25.5	 16
191	  3	310.8	42.8	 16
192	  3	1056.8	133.4	 16
193	  3	240.5	29.6	 16
194	  3	357.0	48.9	 16
195	  3	1266.3	172.8	 16
196	  3	168.3	27.9	 16
197	  3	160.8	24.0	 16
198	  3	158.5	30.7	 16
199	  3	175.3	23.3	 16
200	  3	147.3	21.5	 16
201	  3	1144.5	149.0	 16
202	  3	4234.5	484.3	 16
203	  3	92.5	17.5	 16
204	  3	160.0	26.1	 16
205	  3	83.3	15.2	 16
206	  3	86.3	19.7	 16
207	  3	663.3	78.8	 16
208	  3	81.3	13.7	 16
209	  3	93.0	14.2	 16
210	  3	96.3	19.7	 16
211	  3	78.0	7.4	 16
212	  3	82.8	15.7	 16
213	  3	93.3	10.7	 16
214	  3	93.0	28.4	 16
215	  3	407.5	65.4	 16
216	  3	79.3	13.6	 16
217	  3	259.0	40.4	 16
218	  3	132.3	22.3	 16
219	  3	157.0	31.3	 16
220	  3	268.0	47.3	 16
221	  3	356.3	41.0	 16
222	  3	90.0	14.1	 16
223	  3	302.8	44.3	 16
224	  3	69.5	13.5	 16
225	  3	108.3	22.5	 16
226	  3	343.0	68.3	 16
227	  3	93.0	17.1	 16
228	  3	80.0	14.5	 20
229	  3	113.0	20.4	 16
230	  3	2279.3	419.4	 16
231	  3	901.3	177.7	 16
232	  3	98.0	20.1	 16
233	  3	271.5	51.7	 16
234	  3	81.3	18.0	 16
235	  3	50.8	9.7	 16
236	  3	46.0	8.6	 16
237	  3	64.3	16.2	 16
238	  3	45.8	11.8	 16
239	  3	48.3	13.1	 16
240	  3	167.5	22.0	 16
241	  3	307.5	63.7	 16
242	  3	84.3	20.4	 16
243	  3	377.3	38.5	 16
244	  3	100.0	17.5	 16
245	  3	99.8	17.5	 16
246	  3	202.0	27.1	 16
247	  3	95.3	15.6	 16
248	  3	74.0	16.1	 16
249	  3	82.3	11.7	 16
250	  3	278.3	38.2	 16
251	  3	97.8	15.8	 16
252	  3	365.3	65.5	 16
253	  3	133.0	20.1	 16
254	  3	109.8	18.4	 16
255	  3	735.3	125.7	 16
256	  3	182.0	26.4	 16
257	  3	152.8	19.6	 16
258	  3	1028.0	204.6	 16
259	  3	500.0	88.4	 16
260	  3	94.0	14.5	 16
261	  3	68.3	16.2	 16
262	  3	67.3	13.6	 16
263	  3	181.8	33.8	 16
264	  3	546.0	66.5	 16
265	  3	499.3	68.2	 16
266	  3	382.5	35.4	 16
267	  3	417.5	58.4	 16
268	  3	82.3	11.5	 16
269	  3	566.3	65.3	 16
270	  3	1177.0	160.8	 16
271	  3	183.0	25.2	 16
272	  3	129.8	22.4	 16
273	  3	647.0	56.5	 16
274	  3	1589.8	184.0	 16
275	  3	338.3	43.0	 16
276	  3	199.3	31.5	 16
277	  3	301.5	37.6	 16
278	  3	189.3	32.9	 16
279	  3	221.5	27.9	 16
280	  3	174.8	25.4	 16
281	  3	96.3	13.4	 16
282	  3	742.8	85.0	 16
283	  3	195.5	34.7	 16
284	  3	179.0	30.7	 16
285	  3	299.3	38.7	 16
286	  3	175.8	20.8	 16
287	  3	127.3	19.8	 16
288	  3	223.3	31.4	 16
289	  3	104.0	17.2	 16
290	  3	152.0	23.7	 16
291	  3	64.0	13.8	 16
292	  3	361.5	51.9	 16
293	  3	2361.3	191.9	 16
294	  3	306.8	44.5	 16
295	  3	156.3	29.9	 16
296	  3	737.8	103.1	 16
297	  3	5649.8	824.4	 16
298	  3	1333.8	204.4	 16
299	  3	1328.5	169.9	 16
300	  3	468.3	56.9	 16
301	  3	123.3	24.5	 16
302	  3	185.3	29.3	 16
303	  3	78.8	14.8	 16
304	  3	188.8	21.5	 16
305	  3	71.8	9.5	 16
306	  3	77.5	15.1	 16
307	  3	141.0	17.4	 16
308	  3	115.8	21.1	 16
309	  3	5910.5	1279.1	 16
310	  3	6707.0	386.2	 16
311	  3	235.5	29.3	 16
312	  3	357.0	43.2	 16
313	  3	361.5	36.5	 16
314	  3	162.0	19.3	 16
315	  3	1168.5	127.2	 16
316	  3	2156.5	199.1	 16
317	  3	1173.5	109.8	 16
318	  3	605.5	74.9	 16
319	  3	95.5	20.3	 16
320	  3	431.8	46.8	 16
321	  3	260.0	29.4	 16
322	  3	176.0	25.7	 16
323	  3	331.5	35.6	 16
324	  3	192.5	38.5	 16
325	  3	171.8	27.2	 16
326	  3	2629.0	316.7	 16
327	  3	78.8	12.8	 16
328	  3	174.5	33.0	 16
329	  3	1902.3	215.0	 16
330	  3	88.0	13.4	 16
331	  3	111.5	28.6	 16
332	  3	72.5	17.0	 16
333	  3	101.0	15.7	 16
334	  3	170.3	21.8	 16
335	  3	66.3	10.3	 16
336	  3	90.3	14.9	 16
337	  3	80.3	20.2	 16
338	  3	83.3	13.5	 16
339	  3	160.0	23.4	 16
340	  3	97.3	15.9	 16
341	  3	4472.0	554.9	 16
342	  3	122.3	13.1	 16
343	  3	153.5	34.3	 16
344	  3	206.8	36.8	 16
345	  3	246.0	29.7	 16
346	  3	216.5	32.3	 16
347	  3	100.0	16.9	 16
348	  3	2073.5	134.4	 16
349	  3	591.0	46.5	 16
350	  3	92.0	15.5	 16
351	  3	104.3	17.6	 16
352	  3	91.0	16.2	 16
353	  3	101.3	22.6	 16
354	  3	258.3	42.8	 16
355	  3	114.3	20.3	 16
356	  3	94.8	13.8	 16
357	  3	345.5	33.7	 16
358	  3	73.5	15.8	 16
359	  3	224.8	30.1	 16
360	  3	124.5	22.8	 16
361	  3	2823.3	434.1	 16
362	  3	3412.0	279.4	 16
363	  3	3862.0	404.3	 16
364	  3	244.3	28.2	 16
365	  3	298.3	51.5	 16
366	  3	70.5	11.1	 16
367	  3	81.8	14.9	 16
368	  3	211.3	30.0	 16
369	  3	105.0	12.6	 16
370	  3	108.0	14.0	 16
371	  3	1240.3	196.8	 20
372	  3	119.3	17.4	 16
373	  3	2465.5	376.4	 16
374	  3	115.8	14.1	 16
375	  3	93.0	17.6	 16
376	  3	356.0	53.2	 16
377	  3	90.3	16.9	 16
378	  3	141.5	27.2	 16
379	  3	156.5	16.7	 16
380	  3	179.5	50.4	 16
381	  3	1874.5	82.8	 16
382	  3	803.0	65.2	 16
383	  3	967.8	142.7	 16
384	  3	112.5	18.4	 16
385	  3	77.3	15.2	 16
386	  3	80.0	12.1	 16
387	  3	356.3	43.9	 16
388	  3	117.3	22.1	 16
389	  3	431.5	44.9	 16
390	  3	368.0	60.6	 16
391	  3	112.8	17.8	 16
392	  3	632.0	94.3	 16
393	  3	108.3	20.2	 16
394	  3	643.5	82.8	 16
395	  3	140.0	20.3	 16
396	  3	1772.8	149.6	 16
397	  3	97.0	17.8	 16
398	  3	86.5	19.3	 16
399	  3	89.3	13.2	 16
400	  3	2206.3	268.0	 16
401	  3	427.8	46.4	 16
402	  3	856.3	91.6	 16
403	  3	120.3	22.2	 16
404	  3	101.8	22.0	 16
405	  3	251.0	34.1	 16
406	  3	146.5	24.0	 16
407	  3	141.3	18.6	 16
408	  3	126.3	17.2	 16
409	  3	131.0	12.3	 16
410	  3	214.3	32.0	 16
411	  3	905.8	109.7	 16
412	  3	317.5	45.8	 16
413	  3	2523.5	287.0	 16
414	  3	112.8	12.8	 16
415	  3	94.8	13.6	 16
416	  3	185.8	25.7	 16
417	  3	167.0	21.9	 16
418	  3	252.3	35.2	 16
419	  3	136.8	18.6	 16
420	  3	68.0	9.6	 16
421	  3	2505.3	367.0	 16
422	  3	1211.0	150.1	 16
423	  3	143.5	25.2	 16
424	  3	125.0	18.3	 16
425	  3	3336.3	456.3	 16
426	  3	61.3	8.1	 16
427	  3	117.8	19.9	 16
428	  3	95.5	12.0	 16
429	  3	1629.0	199.6	 16
430	  3	373.3	55.9	 16
431	  3	82.3	10.9	 16
432	  3	221.0	33.8	 16
433	  3	1585.5	230.2	 16
434	  3	307.5	56.7	 16
435	  3	409.3	72.1	 16
436	  3	119.0	31.3	 16
437	  3	76.5	14.3	 16
438	  3	72.3	12.9	 16
439	  3	159.8	17.7	 16
440	  3	86.0	10.8	 16
441	  3	348.3	39.1	 16
442	  3	1928.0	209.8	 16
443	  3	890.8	58.4	 16
444	  3	216.0	27.4	 16
445	  3	153.3	25.6	 16
446	  3	78.8	16.7	 16
447	  3	70.3	13.2	 16
448	  3	611.8	73.0	 16
449	  3	99.3	17.6	 16
450	  3	1320.3	156.6	 16
451	  3	71.5	9.2	 16
452	  3	1135.3	163.9	 16
453	  3	855.3	60.2	 16
454	  3	2141.5	173.3	 16
455	  3	666.3	74.2	 16
456	  3	842.8	80.7	 16
457	  3	265.3	55.8	 16
458	  3	94.3	17.8	 16
459	  3	343.8	45.7	 16
460	  3	494.8	79.7	 16
461	  3	1177.5	53.8	 16
462	  3	157.0	28.0	 16
463	  3	64.3	10.1	 16
464	  3	2192.8	153.9	 16
465	  3	7528.3	475.7	 16
466	  3	8102.8	200.8	 16
467	  3	8237.3	420.0	 16
468	  3	218.3	20.6	 16
469	  3	279.5	33.1	 16
470	  3	1126.0	125.4	 16
471	  3	86.5	12.5	 16
472	  3	61.3	10.5	 16
473	  3	49.3	8.6	 16
474	  3	48.3	11.1	 16
475	  3	45.5	8.8	 16
476	  3	52.3	13.6	 16
477	  3	304.5	25.2	 16
478	  3	307.0	39.8	 16
479	  3	116.5	18.6	 16
480	  3	120.5	19.5	 16
481	  3	91.0	13.0	 16
482	  3	154.3	29.1	 16
483	  3	645.3	77.6	 16
484	  3	154.8	25.6	 16
485	  3	320.8	35.1	 16
486	  3	191.3	31.0	 16
487	  3	179.0	27.9	 16
488	  3	201.3	23.1	 16
489	  3	70.3	13.7	 16
490	  3	92.0	16.0	 16
491	  3	561.5	87.0	 16
492	  3	133.0	18.2	 16
493	  3	132.3	22.1	 16
494	  3	106.5	20.7	 16
495	  3	1807.8	221.4	 16
496	  3	819.0	97.2	 16
497	  3	396.8	40.1	 16
498	  3	133.8	28.0	 16
499	  3	95.0	21.2	 16
500	  3	448.5	70.7	 16
501	  3	255.8	38.3	 16
502	  3	1064.8	135.3	 16
503	  3	75.5	11.2	 16
504	  3	69.5	13.8	 16
505	  3	9262.0	1677.6	 16
506	  3	387.3	67.7	 16
507	  3	245.8	30.4	 16
508	  3	140.0	24.3	 16
509	  3	194.0	39.4	 16
510	  3	414.3	47.9	 16
511	  3	181.3	35.5	 16
512	  3	1442.0	256.9	 16
513	  3	77.5	13.7	 20
514	  3	69.3	14.2	 16
515	  3	72.3	16.2	 16
516	  3	743.3	93.1	 16
517	  3	716.5	95.0	 16
518	  3	148.0	24.6	 16
519	  3	455.5	68.4	 16
520	  3	157.3	30.2	 16
521	  3	170.0	26.7	 16
522	  3	595.0	58.6	 16
523	  3	516.5	63.6	 16
524	  3	914.3	164.2	 16
525	  3	76.0	15.3	 16
526	  3	91.8	12.9	 16
527	  3	263.8	35.3	 16
528	  3	99.5	14.9	 16
529	  3	326.3	59.5	 16
530	  3	81.3	13.2	 16
531	  3	127.0	20.6	 16
532	  3	187.0	32.3	 16
533	  3	109.0	15.7	 16
534	  3	719.3	89.2	 16
535	  3	257.5	34.6	 16
536	  3	303.5	48.3	 16
537	  3	169.8	19.0	 16
538	  3	123.0	18.4	 16
539	  3	887.3	116.5	 16
540	  3	114.5	21.7	 16
541	  3	448.3	56.1	 16
542	  3	379.5	41.7	 16
543	  3	272.0	45.7	 16
544	  3	716.5	61.1	 16
545	  3	1122.8	102.5	 16
546	  3	328.0	47.0	 16
547	  3	276.8	39.1	 16
548	  3	905.8	108.7	 16
549	  3	154.5	22.5	 16
550	  3	82.5	9.9	 16
551	  3	279.8	42.6	 16
552	  3	1748.8	214.9	 16
553	  3	102.0	15.5	 16
554	  3	4524.8	435.5	 16
555	  3	74.8	14.6	 16
556	  3	301.3	34.7	 16
557	  3	321.8	50.4	 16
558	  3	2053.8	234.1	 16
559	  3	312.3	23.0	 16
560	  3	4117.8	350.6	 16
561	  3	1217.8	94.5	 16
562	  3	421.3	36.7	 16
563	  3	254.5	30.1	 16
564	  3	880.8	89.0	 16
565	  3	274.3	24.5	 16
566	  3	1821.8	209.4	 16
567	  3	72.8	17.2	 16
568	  3	121.8	13.3	 16
569	  3	408.5	56.1	 16
570	  3	81.5	15.6	 16
571	  3	68.3	8.3	 16
572	  3	2195.5	253.2	 16
573	  3	167.3	26.2	 16
574	  3	144.3	23.5	 16
575	  3	419.8	42.6	 16
576	  3	365.0	40.4	 16
577	  3	864.8	92.3	 16
578	  3	87.5	11.4	 16
579	  3	134.0	20.2	 16
580	  3	156.5	22.2	 16
581	  3	210.0	18.1	 16
582	  3	103.8	18.5	 16
583	  3	271.8	32.3	 16
584	  3	309.3	38.5	 16
585	  3	186.3	17.7	 16
586	  3	208.5	20.8	 16
587	  3	220.0	36.6	 16
588	  3	125.8	24.2	 16
589	  3	230.3	29.1	 16
590	  3	271.0	49.4	 16
591	  3	107.5	13.3	 16
592	  3	400.5	40.6	 16
593	  3	917.5	123.9	 16
594	  3	101.5	15.0	 16
595	  3	340.8	57.1	 16
596	  3	488.3	48.7	 16
597	  3	476.8	59.1	 16
598	  3	156.0	20.7	 16
599	  3	211.3	25.4	 16
600	  3	547.3	70.6	 16
601	  3	461.8	46.2	 16
602	  3	566.8	52.4	 16
603	  3	806.0	48.9	 16
604	  3	317.5	47.4	 16
605	  3	1605.5	229.9	 16
606	  3	113.0	19.2	 16
607	  3	591.5	142.3	 16
608	  3	573.3	92.5	 16
609	  3	400.0	57.9	 16
610	  3	745.3	62.0	 16
611	  3	482.8	64.7	 16
612	  3	821.3	133.6	 16
613	  3	61.5	5.9	 16
614	  3	658.8	76.5	 16
615	  3	77.0	16.4	 16
616	  3	162.3	22.4	 16
617	  3	260.8	36.4	 16
618	  3	201.0	35.5	 16
619	  3	97.5	12.5	 16
620	  3	4366.0	628.3	 16
621	  3	317.0	36.6	 16
622	  3	64.5	9.4	 16
623	  3	85.3	19.6	 16
624	  3	61.3	10.6	 16
625	  3	130.5	20.0	 16
626	  3	309.0	24.6	 16
627	  3	3424.8	621.8	 16
628	  3	681.8	96.0	 16
629	  3	525.0	44.7	 16
630	  3	280.3	41.8	 16
631	  3	2670.0	454.9	 16
632	  3	87.5	10.8	 16
633	  3	190.8	37.6	 16
634	  3	234.8	26.5	 16
635	  3	296.3	40.1	 16
636	  3	450.0	66.4	 16
637	  3	1852.3	328.1	 16
638	  3	79.8	15.4	 16
639	  3	889.3	141.7	 16
640	  3	1336.3	228.1	 16
641	  3	104.8	17.2	 16
642	  3	74.3	14.1	 16
643	  3	95.5	18.9	 16
644	  3	319.5	31.2	 16
645	  3	1005.0	139.2	 16
646	  3	4780.8	752.1	 16
647	  3	82.3	16.3	 16
648	  3	214.5	29.4	 16
649	  3	87.3	16.9	 16
650	  3	64.5	8.4	 16
651	  3	123.0	20.0	 16
652	  3	88.3	17.5	 16
653	  3	94.3	14.2	 16
654	  3	64.0	8.4	 16
655	  3	113.8	14.0	 16
656	  3	205.5	37.7	 15
657	  3	74.0	11.4	 16
658	  3	64.3	13.0	 16
659	  3	83.0	13.6	 16
660	  3	664.3	111.5	 16
661	  3	846.5	111.9	 16
662	  3	307.8	41.0	 16
663	  3	842.8	139.7	 16
664	  3	128.0	34.2	 16
665	  3	256.3	49.4	 16
666	  3	1482.5	207.8	 16
667	  3	121.3	19.1	 16
668	  3	223.3	24.4	 16
669	  3	218.8	22.0	 16
670	  3	108.0	12.6	 16
671	  3	1304.8	174.5	 16
672	  3	165.8	42.8	 16
673	  3	1813.3	217.2	 16
674	  3	252.5	41.6	 16
675	  3	232.3	36.5	 16
676	  3	292.0	24.1	 16
677	  3	247.8	29.6	 16
678	  3	69.3	13.9	 16
679	  3	83.5	15.2	 16
680	  3	114.3	12.8	 16
681	  3	79.8	14.8	 16
682	  3	443.3	59.8	 16
683	  3	139.3	18.2	 16
684	  3	106.5	15.5	 16
685	  3	155.5	25.3	 16
686	  3	359.3	40.9	 16
687	  3	104.5	16.3	 16
688	  3	161.3	24.9	 16
689	  3	427.8	50.5	 16
690	  3	2272.3	257.3	 16
691	  3	334.0	42.4	 16
692	  3	901.3	80.4	 16
693	  3	145.8	20.6	 16
694	  3	230.0	27.3	 16
695	  3	343.3	43.7	 16
696	  3	1294.5	110.3	 16
697	  3	162.0	22.6	 16
698	  3	290.8	40.0	 16
699	  3	374.5	61.5	 16
700	  3	2205.8	276.0	 16
701	  3	1132.3	100.1	 16
702	  3	305.3	48.5	 16
703	  3	453.0	47.4	 16
704	  3	338.3	37.7	 16
705	  3	1087.0	96.8	 16
706	  3	123.5	12.9	 16
707	  3	111.3	19.6	 16
708	  3	8550.8	1330.1	 16
709	  3	176.8	17.3	 16
710	  3	9533.0	1360.9	 16
711	  3	253.0	51.6	 16
  0	  4	97.0	13.5	 16
  1	  4	94.0	9.7	 16
  2	  4	95.8	10.4	 16
  3	  4	86.3	13.0	 16
  4	  4	94.8	15.3	 16
  5	  4	170.0	29.3	 16
  6	  4	107.5	12.8	 16
  7	  4	264.5	27.0	 16
  8	  4	108.3	12.9	 16
  9	  4	114.3	13.3	 16
 10	  4	105.8	15.0	 16
 11	  4	231.8	47.9	 16
 12	  4	126.5	18.6	 16
 13	  4	235.0	40.6	 16
 14	  4	143.5	25.8	 16
 15	  4	224.5	22.7	 16
 16	  4	220.0	18.9	 16
 17	  4	2791.3	256.0	 16
 18	  4	1074.3	85.2	 16
 19	  4	904.5	131.3	 16
 20	  4	127.0	19.3	 16
 21	  4	91.8	14.1	 16
 22	  4	251.0	31.0	 16
 23	  4	562.0	81.4	 16
 24	  4	104.5	20.3	 16
 25	  4	179.5	28.3	 16
 26	  4	138.3	24.9	 16
 27	  4	180.5	21.7	 16
 28	  4	154.5	17.8	 16
 29	  4	149.5	12.8	 16
 30	  4	149.8	14.1	 16
 31	  4	193.0	25.2	 16
 32	  4	128.5	17.6	 16
 33	  4	189.5	32.6	 16
 34	  4	179.8	34.1	 16
 35	  4	316.8	52.4	 16
 36	  4	191.0	25.7	 16
 37	  4	217.0	24.8	 16
 38	  4	174.8	30.2	 16
 39	  4	121.3	19.1	 16
 40	  4	149.0	18.7	 16
 41	  4	215.3	24.6	 16
 42	  4	224.3	34.6	 16
 43	  4	144.3	16.1	 16
 44	  4	163.0	24.9	 16
 45	  4	103.5	13.9	 16
 46	  4	172.5	22.7	 16
 47	  4	263.5	34.4	 16
 48	  4	88.0	10.3	 16
 49	  4	105.3	16.7	 16
 50	  4	255.0	36.8	 16
 51	  4	185.5	23.4	 16
 52	  4	242.3	38.0	 16
 53	  4	107.5	14.5	 16
 54	  4	140.3	15.8	 16
 55	  4	241.5	28.5	 16
 56	  4	285.0	59.1	 16
 57	  4	237.8	34.9	 16
 58	  4	135.3	15.9	 16
 59	  4	177.0	24.8	 16
 60	  4	102.5	14.1	 16
 61	  4	233.3	25.7	 16
 62	  4	208.3	31.6	 16
 63	  4	412.3	54.7	 16
 64	  4	2895.8	452.3	 16
 65	  4	179.5	21.3	 16
 66	  4	129.8	21.1	 16
 67	  4	217.0	22.1	 16
 68	  4	113.3	11.9	 16
 69	  4	127.3	19.5	 16
 70	  4	227.3	29.2	 16
 71	  4	149.3	12.6	 16
 72	  4	148.8	30.7	 16
 73	  4	344.8	37.8	 16
 74	  4	168.8	22.8	 16
 75	  4	110.8	16.6	 16
 76	  4	91.3	11.8	 16
 77	  4	100.8	11.0	 16
 78	  4	182.3	32.0	 16
 79	  4	120.5	17.1	 16
 80	  4	107.8	15.4	 16
 81	  4	106.0	11.4	 16
 82	  4	101.0	16.2	 16
 83	  4	434.5	28.4	 16
 84	  4	259.3	26.0	 16
 85	  4	121.8	18.6	 16
 86	  4	146.0	24.2	 16
 87	  4	306.8	45.0	 16
 88	  4	796.3	80.6	 16
 89	  4	431.3	36.9	 16
 90	  4	278.8	25.0	 20
 91	  4	407.0	39.7	 16
 92	  4	430.5	45.5	 16
 93	  4	382.0	37.1	 16
 94	  4	403.5	45.4	 16
 95	  4	373.0	59.0	 16
 96	  4	203.5	25.9	 16
 97	  4	410.0	44.2	 16
 98	  4	123.8	25.1	 16
 99	  4	99.5	15.6	 16
100	  4	198.8	27.5	 16
101	  4	394.0	62.4	 16
102	  4	88.0	15.8	 16
103	  4	188.8	33.2	 16
104	  4	224.3	32.5	 16
105	  4	141.8	20.5	 16
106	  4	101.8	20.7	 16
107	  4	223.5	23.7	 16
108	  4	95.5	16.8	 16
109	  4	188.3	30.4	 16
110	  4	75.5	6.9	 16
111	  4	123.3	20.5	 16
112	  4	269.3	42.7	 16
113	  4	149.0	20.6	 16
114	  4	158.8	33.6	 16
115	  4	115.3	19.4	 16
116	  4	117.3	21.2	 16
117	  4	142.8	20.3	 16
118	  4	123.0	17.8	 16
119	  4	268.0	32.4	 16
120	  4	286.0	38.2	 16
121	  4	212.5	29.1	 16
122	  4	99.5	16.1	 16
123	  4	73.5	16.4	 16
124	  4	73.3	13.4	 16
125	  4	88.8	13.8	 16
126	  4	140.0	24.6	 16
127	  4	90.5	13.7	 16
128	  4	92.8	16.1	 16
129	  4	90.3	23.3	 16
130	  4	135.0	17.7	 16
131	  4	1015.0	92.7	 16
132	  4	425.3	60.1	 16
133	  4	133.3	39.9	 16
134	  4	313.0	70.3	 16
135	  4	183.5	30.7	 16
136	  4	929.3	140.6	 16
137	  4	91.0	26.3	 16
138	  4	255.0	87.1	 16
139	  4	612.8	89.2	 16
140	  4	89.5	15.7	 16
141	  4	90.3	19.1	 16
142	  4	537.0	56.5	 16
143	  4	397.8	70.8	 16
144	  4	61.0	6.4	 16
145	  4	76.3	12.2	 16
146	  4	1855.0	349.8	 16
147	  4	155.5	24.2	 16
148	  4	132.5	26.8	 16
149	  4	97.8	23.9	 16
150	  4	109.3	19.3	 16
151	  4	172.8	25.6	 16
152	  4	132.0	15.7	 16
153	  4	184.0	35.6	 16
154	  4	77.8	16.1	 16
155	  4	141.5	25.4	 16
156	  4	66.8	13.2	 16
157	  4	101.8	18.6	 16
158	  4	113.5	16.8	 16
159	  4	141.5	21.4	 16
160	  4	431.5	41.6	 16
161	  4	392.5	28.8	 16
162	  4	1507.5	213.8	 16
163	  4	126.3	20.6	 16
164	  4	197.3	23.9	 16
165	  4	264.5	22.3	 16
166	  4	102.3	16.0	 16
167	  4	161.0	23.8	 16
168	  4	100.0	22.8	 16
169	  4	97.3	25.9	 16
170	  4	122.5	23.2	 16
171	  4	76.3	22.8	 16
172	  4	91.5	17.9	 16
173	  4	64.0	10.9	 16
174	  4	115.3	28.7	 16
175	  4	80.0	12.7	 16
176	  4	277.3	32.2	 16
177	  4	72.3	18.5	 16
178	  4	58.0	9.5	 16
179	  4	351.3	52.6	 16
180	  4	400.8	49.1	 16
181	  4	79.3	14.3	 16
182	  4	82.8	14.3	 16
183	  4	217.3	31.3	 16
184	  4	96.0	11.9	 16
185	  4	112.8	20.9	 16
186	  4	68.8	13.2	 16
187	  4	71.8	17.1	 16
188	  4	74.8	13.0	 16
189	  4	89.5	20.3	 16
190	  4	85.3	18.7	 16
191	  4	202.0	40.2	 16
192	  4	249.5	41.4	 16
193	  4	122.5	25.0	 16
194	  4	142.0	25.1	 16
195	  4	192.0	37.6	 16
196	  4	222.3	40.4	 16
197	  4	345.5	39.1	 16
198	  4	192.8	26.7	 16
199	  4	341.3	48.9	 16
200	  4	129.0	19.8	 16
201	  4	136.3	31.9	 16
202	  4	204.3	38.9	 16
203	  4	83.0	14.5	 16
204	  4	72.3	14.1	 16
205	  4	121.3	23.5	 16
206	  4	141.0	16.0	 16
207	  4	133.3	18.3	 16
208	  4	71.3	21.9	 16
209	  4	98.3	20.4	 16
210	  4	90.8	19.6	 16
211	  4	61.8	12.7	 12
212	  4	62.0	10.5	 16
213	  4	103.5	18.6	 16
214	  4	83.0	18.7	 16
215	  4	122.8	25.4	 16
216	  4	76.0	10.1	 16
217	  4	240.5	30.9	 16
218	  4	181.5	22.5	 16
219	  4	153.0	24.7	 16
220	  4	98.8	15.8	 16
221	  4	109.8	19.5	 16
222	  4	117.0	24.9	 16
223	  4	97.8	17.0	 16
224	  4	60.3	10.5	 16
225	  4	81.5	15.9	 16
226	  4	124.3	17.0	 16
227	  4	94.8	19.0	 16
228	  4	107.8	16.5	 16
229	  4	76.0	13.7	 16
230	  4	116.5	19.8	 16
231	  4	107.3	17.9	 16
232	  4	77.5	15.8	 16
233	  4	89.3	14.9	 20
234	  4	64.3	11.5	 16
235	  4	48.5	11.5	 16
236	  4	50.0	12.6	 16
237	  4	47.5	10.4	 16
238	  4	56.5	12.9	 16
239	  4	52.0	5.6	 16
240	  4	129.3	32.5	 16
241	  4	153.0	20.1	 16
242	  4	101.5	19.8	 16
243	  4	520.5	65.6	 16
244	  4	142.8	21.0	 16
245	  4	111.8	28.5	 16
246	  4	306.5	48.2	 16
247	  4	204.3	30.0	 16
248	  4	77.3	14.1	 16
249	  4	82.3	11.2	 16
250	  4	79.0	12.3	 16
251	  4	93.5	13.7	 16
252	  4	125.3	19.4	 16
253	  4	69.3	13.6	 16
254	  4	111.8	16.6	 16
255	  4	161.3	21.0	 16
256	  4	162.8	35.8	 16
257	  4	117.3	22.4	 16
258	  4	166.0	24.3	 16
259	  4	76.8	12.4	 16
260	  4	68.0	9.0	 16
261	  4	61.3	8.9	 16
262	  4	69.3	14.9	 16
263	  4	111.5	12.3	 16
264	  4	322.5	44.2	 16
265	  4	78.8	17.0	 16
266	  4	175.5	21.9	 16
267	  4	104.3	12.7	 16
268	  4	77.0	14.9	 16
269	  4	113.3	16.5	 16
270	  4	186.3	28.0	 16
271	  4	90.8	20.5	 16
272	  4	365.5	98.1	 16
273	  4	1571.8	81.6	 16
274	  4	630.3	70.6	 16
275	  4	345.8	40.2	 16
276	  4	145.3	23.1	 16
277	  4	176.0	24.0	 16
278	  4	172.0	25.7	 16
279	  4	135.8	24.1	 16
280	  4	125.0	25.8	 16
281	  4	88.5	24.1	 16
282	  4	82.8	12.5	 16
283	  4	161.5	22.5	 16
284	  4	124.5	26.5	 16
285	  4	278.8	34.7	 16
286	  4	202.8	29.7	 16
287	  4	210.5	26.6	 16
288	  4	154.5	21.1	 16
289	  4	89.0	21.9	 16
290	  4	115.3	16.4	 16
291	  4	81.3	13.2	 16
292	  4	182.0	31.7	 16
293	  4	398.8	47.9	 16
294	  4	203.8	31.0	 16
295	  4	168.8	24.1	 16
296	  4	246.8	35.1	 16
297	  4	701.3	163.5	 16
298	  4	383.0	24.9	 16
299	  4	335.3	38.9	 16
300	  4	131.8	17.2	 12
301	  4	103.5	25.5	 16
302	  4	98.5	10.9	 16
303	  4	108.3	10.4	 16
304	  4	209.3	15.5	 16
305	  4	83.8	15.1	 16
306	  4	67.5	21.6	 16
307	  4	115.3	20.7	 16
308	  4	91.3	14.3	 16
309	  4	798.3	133.5	 16
310	  4	1103.0	148.4	 16
311	  4	196.8	27.9	 16
312	  4	334.3	50.6	 16
313	  4	514.8	39.9	 16
314	  4	265.0	43.2	 16
315	  4	164.3	18.2	 16
316	  4	348.3	44.7	 16
317	  4	102.0	17.9	 16
318	  4	72.5	13.2	 16
319	  4	86.0	15.5	 16
320	  4	226.8	39.1	 16
321	  4	219.5	24.5	 16
322	  4	112.5	17.3	 16
323	  4	109.5	21.6	 16
324	  4	107.3	22.8	 16
325	  4	270.8	25.9	 16
326	  4	246.3	48.8	 16
327	  4	68.0	14.5	 16
328	  4	249.8	40.9	 16
329	  4	655.0	145.6	 16
330	  4	95.0	16.3	 16
331	  4	74.3	11.9	 16
332	  4	82.5	15.0	 16
333	  4	71.3	12.8	 16
334	  4	74.3	11.3	 16
335	  4	76.3	14.1	 16
336	  4	66.5	11.5	 16
337	  4	86.5	12.4	 16
338	  4	92.3	20.0	 16
339	  4	65.5	11.1	 16
340	  4	75.8	12.2	 16
341	  4	1043.8	136.3	 16
342	  4	111.3	20.6	 16
343	  4	146.3	16.9	 16
344	  4	130.3	24.2	 16
345	  4	188.5	22.6	 16
346	  4	125.0	17.9	 16
347	  4	105.0	17.9	 16
348	  4	698.8	162.1	 16
349	  4	209.0	28.9	 16
350	  4	64.8	8.3	 16
351	  4	102.0	21.1	 16
352	  4	123.0	27.9	 16
353	  4	94.3	15.2	 16
354	  4	97.3	11.6	 16
355	  4	140.5	17.6	 16
356	  4	94.0	21.1	 16
357	  4	280.0	38.9	 16
358	  4	60.3	14.1	 16
359	  4	65.3	10.3	 16
360	  4	94.5	14.8	 16
361	  4	422.3	59.3	 16
362	  4	516.8	54.7	 16
363	  4	574.0	87.1	 16
364	  4	252.5	29.1	 16
365	  4	617.5	68.7	 16
366	  4	76.3	12.6	 16
367	  4	117.5	18.7	 16
368	  4	91.3	16.3	 16
369	  4	134.8	24.3	 16
370	  4	130.0	20.1	 16
371	  4	336.5	50.1	 16
372	  4	175.0	27.9	 16
373	  4	501.0	81.7	 16
374	  4	71.8	13.3	 16
375	  4	100.8	21.5	 20
376	  4	146.0	29.6	 16
377	  4	96.5	17.1	 16
378	  4	157.3	21.2	 16
379	  4	138.3	19.8	 16
380	  4	405.3	81.1	 16
381	  4	2040.8	137.5	 16
382	  4	987.0	80.4	 16
383	  4	810.0	78.9	 16
384	  4	132.3	23.6	 16
385	  4	61.8	11.2	 16
386	  4	69.3	12.4	 16
387	  4	283.5	41.4	 16
388	  4	59.3	9.5	 16
389	  4	137.8	13.8	 12
390	  4	60.8	11.7	 16
391	  4	69.0	12.4	 16
392	  4	120.3	21.0	 16
393	  4	89.0	15.5	 16
394	  4	147.5	26.3	 16
395	  4	211.0	37.9	 16
396	  4	305.3	34.1	 16
397	  4	90.5	18.9	 16
398	  4	98.3	15.7	 16
399	  4	103.8	20.3	 16
400	  4	377.0	70.9	 16
401	  4	171.5	23.8	 16
402	  4	176.5	29.5	 16
403	  4	64.5	12.0	 16
404	  4	70.5	14.9	 16
405	  4	226.5	21.4	 16
406	  4	129.3	19.4	 16
407	  4	290.5	36.5	 16
408	  4	95.0	15.1	 16
409	  4	117.3	20.8	 16
410	  4	148.0	23.7	 16
411	  4	575.0	77.3	 16
412	  4	578.5	48.0	 16
413	  4	1415.5	269.8	 16
414	  4	82.3	12.8	 16
415	  4	130.0	19.5	 16
416	  4	117.5	20.8	 16
417	  4	87.0	10.0	 16
418	  4	112.8	15.2	 16
419	  4	329.5	40.5	 16
420	  4	72.0	13.1	 16
421	  4	186.0	29.6	 16
422	  4	207.8	37.6	 16
423	  4	217.3	29.8	 16
424	  4	104.5	17.7	 16
425	  4	639.3	102.0	 16
426	  4	64.3	11.0	 16
427	  4	63.3	12.6	 16
428	  4	56.5	11.5	 16
429	  4	352.5	56.6	 16
430	  4	331.8	34.4	 16
431	  4	128.0	17.8	 16
432	  4	76.3	17.6	 16
433	  4	120.3	16.7	 16
434	  4	150.0	21.4	 16
435	  4	65.8	14.7	 16
436	  4	61.0	12.5	 16
437	  4	81.5	21.5	 16
438	  4	61.3	11.5	 16
439	  4	129.0	13.0	 16
440	  4	126.0	21.8	 16
441	  4	131.5	25.0	 16
442	  4	112.3	19.5	 16
443	  4	698.8	46.8	 16
444	  4	177.8	24.2	 16
445	  4	80.5	18.1	 16
446	  4	74.3	17.3	 16
447	  4	82.5	18.2	 16
448	  4	96.5	13.5	 16
449	  4	128.0	13.3	 16
450	  4	271.3	30.4	 16
451	  4	66.0	10.1	 16
452	  4	134.8	23.5	 16
453	  4	644.8	46.0	 16
454	  4	1210.8	75.3	 16
455	  4	269.8	26.2	 16
456	  4	280.3	47.8	 16
457	  4	116.5	18.0	 16
458	  4	72.0	11.9	 16
459	  4	136.5	18.7	 16
460	  4	637.5	88.3	 16
461	  4	2021.8	278.6	 16
462	  4	86.3	15.9	 16
463	  4	58.3	8.3	 16
464	  4	672.8	111.7	 16
465	  4	941.0	139.6	 16
466	  4	1109.5	150.7	 16
467	  4	1178.0	194.5	 16
468	  4	242.3	33.6	 16
469	  4	94.3	12.1	 16
470	  4	535.3	53.9	 16
471	  4	67.8	12.2	 16
472	  4	61.0	9.7	 16
473	  4	58.5	20.7	 16
474	  4	56.3	14.2	 16
475	  4	52.8	9.9	 16
476	  4	51.0	9.6	 16
477	  4	157.8	24.0	 16
478	  4	87.0	14.7	 12
479	  4	139.5	21.1	 16
480	  4	68.0	12.2	 16
481	  4	60.0	6.1	 16
482	  4	93.3	20.1	 16
483	  4	168.8	29.9	 16
484	  4	93.3	19.8	 16
485	  4	181.0	33.4	 16
486	  4	77.5	15.5	 16
487	  4	78.0	16.2	 16
488	  4	168.3	25.1	 16
489	  4	79.5	15.1	 16
490	  4	57.3	12.1	 16
491	  4	71.0	9.4	 16
492	  4	98.0	17.3	 16
493	  4	122.3	22.3	 16
494	  4	76.3	14.7	 16
495	  4	645.5	103.3	 16
496	  4	134.5	22.6	 16
497	  4	813.0	66.7	 16
498	  4	150.8	27.4	 16
499	  4	79.3	11.2	 16
500	  4	148.5	17.3	 16
501	  4	271.0	37.0	 16
502	  4	322.8	71.5	 16
503	  4	80.8	15.0	 16
504	  4	79.3	17.0	 16
505	  4	2248.0	474.7	 16
506	  4	108.3	15.9	 16
507	  4	189.0	29.7	 16
508	  4	91.0	19.5	 16
509	  4	185.8	29.5	 16
510	  4	460.8	59.8	 16
511	  4	240.3	20.4	 16
512	  4	376.8	58.2	 16
513	  4	65.5	21.8	 16
514	  4	74.5	14.8	 16
515	  4	63.8	13.1	 16
516	  4	140.8	20.3	 16
517	  4	135.5	23.6	 16
518	  4	111.0	19.2	 20
519	  4	128.8	18.0	 16
520	  4	67.8	12.6	 16
521	  4	83.5	14.0	 16
522	  4	362.5	70.1	 16
523	  4	217.0	31.3	 16
524	  4	122.0	22.0	 16
525	  4	69.3	12.9	 16
526	  4	91.3	20.4	 16
527	  4	88.5	13.8	 16
528	  4	109.8	18.5	 16
529	  4	103.3	23.1	 16
530	  4	73.3	11.2	 16
531	  4	70.0	14.7	 16
532	  4	111.8	16.5	 16
533	  4	78.0	18.4	 16
534	  4	153.3	24.9	 16
535	  4	242.3	25.0	 16
536	  4	153.3	18.6	 16
537	  4	164.0	24.6	 16
538	  4	100.3	11.6	 16
539	  4	149.8	33.5	 16
540	  4	68.3	8.5	 16
541	  4	135.8	23.5	 16
542	  4	133.3	20.5	 16
543	  4	390.0	35.7	 16
544	  4	334.8	49.8	 16
545	  4	223.3	39.8	 16
546	  4	122.0	23.6	 16
547	  4	175.3	23.2	 16
548	  4	415.3	43.8	 16
549	  4	125.0	24.8	 16
550	  4	77.8	17.1	 16
551	  4	66.5	8.4	 16
552	  4	134.5	21.1	 16
553	  4	77.3	17.1	 16
554	  4	340.5	55.2	 16
555	  4	69.0	9.0	 16
556	  4	91.3	10.6	 16
557	  4	97.8	16.0	 16
558	  4	163.8	24.1	 16
559	  4	390.3	49.3	 16
560	  4	1188.0	123.1	 16
561	  4	1330.5	124.4	 16
562	  4	626.3	80.2	 16
563	  4	118.8	16.7	 16
564	  4	334.3	34.4	 16
565	  4	265.5	22.1	 16
566	  4	815.3	93.8	 16
567	  4	56.5	10.1	 12
568	  4	106.8	15.6	 16
569	  4	90.3	12.8	 16
570	  4	69.0	13.4	 16
571	  4	64.0	10.6	 16
572	  4	312.3	66.4	 16
573	  4	86.8	15.0	 16
574	  4	92.3	15.7	 16
575	  4	208.0	29.5	 16
576	  4	133.3	25.0	 16
577	  4	249.3	34.6	 16
578	  4	84.0	13.4	 16
579	  4	159.5	33.1	 16
580	  4	152.5	22.2	 16
581	  4	179.3	28.1	 16
582	  4	190.0	24.7	 16
583	  4	162.3	21.0	 16
584	  4	234.3	28.7	 16
585	  4	417.3	40.6	 16
586	  4	107.5	15.8	 16
587	  4	127.0	20.9	 16
588	  4	190.3	25.9	 16
589	  4	210.8	21.7	 16
590	  4	122.8	15.9	 16
591	  4	111.0	17.6	 16
592	  4	202.0	26.9	 16
593	  4	107.0	18.2	 16
594	  4	72.3	9.2	 16
595	  4	94.5	15.5	 16
596	  4	126.0	19.9	 16
597	  4	127.5	26.0	 16
598	  4	85.0	16.2	 16
599	  4	106.3	13.6	 16
600	  4	298.0	28.0	 16
601	  4	305.3	37.2	 16
602	  4	421.5	45.9	 16
603	  4	774.3	60.9	 16
604	  4	144.3	14.5	 16
605	  4	484.3	65.6	 16
606	  4	123.8	22.6	 16
607	  4	145.8	24.6	 16
608	  4	270.5	41.4	 16
609	  4	187.0	33.1	 16
610	  4	218.3	26.4	 16
611	  4	170.0	23.5	 16
612	  4	130.8	27.8	 16
613	  4	63.3	8.7	 16
614	  4	150.3	41.9	 16
615	  4	71.0	14.5	 16
616	  4	113.0	20.2	 16
617	  4	177.0	22.6	 16
618	  4	78.0	9.9	 16
619	  4	78.5	14.2	 16
620	  4	624.3	105.1	 16
621	  4	107.3	22.6	 16
622	  4	62.5	13.7	 16
623	  4	91.3	21.4	 16
624	  4	60.3	11.7	 16
625	  4	200.3	26.1	 16
626	  4	98.8	16.6	 16
627	  4	460.8	91.7	 16
628	  4	271.5	47.9	 16
629	  4	409.0	36.4	 16
630	  4	100.3	19.0	 16
631	  4	215.8	27.6	 16
632	  4	76.0	14.4	 16
633	  4	140.5	19.8	 16
634	  4	132.5	19.5	 16
635	  4	127.8	21.2	 16
636	  4	276.3	67.5	 16
637	  4	385.3	68.3	 16
638	  4	118.5	38.0	 16
639	  4	185.5	43.4	 16
640	  4	203.3	38.4	 16
641	  4	77.3	15.1	 16
642	  4	73.8	11.7	 16
643	  4	104.3	19.2	 16
644	  4	200.3	32.6	 16
645	  4	334.0	43.3	 16
646	  4	333.3	70.9	 16
647	  4	64.3	9.6	 16
648	  4	137.5	19.7	 16
649	  4	79.8	18.8	 16
650	  4	63.5	13.4	 16
651	  4	127.3	21.0	 16
652	  4	72.3	11.3	 16
653	  4	92.3	13.1	 16
654	  4	69.5	10.7	 16
655	  4	91.3	15.3	 16
656	  4	95.3	10.5	 16
657	  4	75.5	12.9	 16
658	  4	67.8	11.1	 16
659	  4	63.0	13.0	 16
660	  4	98.8	19.2	 20
661	  4	293.5	31.8	 16
662	  4	178.5	19.7	 16
663	  4	438.5	70.7	 16
664	  4	126.3	21.0	 16
665	  4	134.8	20.5	 16
666	  4	594.3	75.8	 16
667	  4	84.5	15.0	 16
668	  4	107.5	17.9	 16
669	  4	90.0	18.0	 16
670	  4	127.0	16.3	 16
671	  4	251.5	43.7	 16
672	  4	151.3	27.9	 16
673	  4	777.8	58.6	 16
674	  4	428.8	70.3	 16
675	  4	399.3	44.9	 16
676	  4	93.0	17.8	 16
677	  4	145.5	20.9	 16
678	  4	67.0	10.2	 16
679	  4	72.5	10.2	 16
680	  4	195.0	39.3	 16
681	  4	72.8	12.1	 16
682	  4	70.8	9.2	 16
683	  4	79.5	13.6	 16
684	  4	69.0	12.9	 16
685	  4	117.3	18.7	 16
686	  4	160.3	31.1	 16
687	  4	95.3	17.6	 16
688	  4	77.0	11.3	 16
689	  4	89.8	11.9	 16
690	  4	923.0	116.5	 16
691	  4	185.8	22.5	 16
692	  4	647.5	89.0	 16
693	  4	98.3	14.6	 16
694	  4	169.5	19.6	 16
695	  4	246.3	24.6	 16
696	  4	313.0	38.7	 16
697	  4	72.8	12.6	 16
698	  4	95.3	11.4	 16
699	  4	139.3	21.7	 16
700	  4	232.0	30.4	 16
701	  4	162.0	13.7	 16
702	  4	261.0	41.9	 16
703	  4	366.3	46.8	 16
704	  4	381.0	50.2	 16
705	  4	535.0	63.9	 16
706	  4	129.8	16.8	 16
707	  4	98.5	15.5	 16
708	  4	150.0	27.7	 16
709	  4	210.0	92.3	 16
710	  4	208.0	33.6	 16
711	  4	183.5	19.0	 16
  0	  5	139.3	11.2	 16
  1	  5	115.3	15.7	 16
  2	  5	115.5	15.2	 16
  3	  5	357.0	31.0	 16
  4	  5	99.3	14.3	 16
  5	  5	495.5	51.0	 16
  6	  5	2202.3	120.1	 16
  7	  5	211.8	28.6	 16
  8	  5	136.3	22.1	 16
  9	  5	236.5	29.4	 16
 10	  5	198.5	26.7	 16
 11	  5	104.3	11.8	 16
 12	  5	159.3	24.4	 16
 13	  5	8642.8	1483.1	 16
 14	  5	8910.0	1468.9	 16
 15	  5	8585.5	1293.5	 16
 16	  5	175.5	28.3	 16
 17	  5	102.5	17.5	 16
 18	  5	135.3	27.1	 16
 19	  5	151.5	24.5	 16
 20	  5	161.5	28.3	 16
 21	  5	147.5	22.5	 16
 22	  5	151.0	19.0	 16
 23	  5	92.8	15.3	 16
 24	  5	136.0	16.0	 16
 25	  5	136.8	18.2	 16
 26	  5	155.3	26.5	 16
 27	  5	136.8	19.4	 16
 28	  5	147.3	19.3	 16
 29	  5	94.3	15.0	 16
 30	  5	143.8	18.3	 16
 31	  5	136.3	16.7	 16
 32	  5	134.0	19.4	 16
 33	  5	147.3	17.8	 16
 34	  5	147.0	15.4	 16
 35	  5	97.8	19.0	 16
 36	  5	151.0	22.7	 16
 37	  5	8410.3	1363.9	 16
 38	  5	8511.3	1395.4	 16
 39	  5	8417.0	1348.9	 16
 40	  5	169.8	21.0	 16
 41	  5	108.3	12.0	 16
 42	  5	9252.3	646.7	 16
 43	  5	160.3	17.8	 16
 44	  5	154.0	28.8	 16
 45	  5	124.0	19.0	 16
 46	  5	139.3	21.1	 16
 47	  5	86.0	11.9	 16
 48	  5	129.8	20.1	 16
 49	  5	131.3	15.3	 16
 50	  5	129.3	17.0	 16
 51	  5	141.5	16.6	 16
 52	  5	137.8	21.4	 16
 53	  5	98.3	23.6	 16
 54	  5	143.0	21.0	 16
 55	  5	117.3	15.1	 16
 56	  5	128.0	17.5	 16
 57	  5	123.3	14.9	 16
 58	  5	120.8	13.9	 16
 59	  5	88.0	12.8	 16
 60	  5	79.8	13.9	 16
 61	  5	83.5	14.4	 16
 62	  5	9161.5	696.8	 16
 63	  5	164.5	31.5	 16
 64	  5	143.0	16.3	 16
 65	  5	156.5	22.1	 16
 66	  5	7286.0	751.1	 16
 67	  5	123.5	19.5	 16
 68	  5	157.5	31.2	 16
 69	  5	8117.0	828.2	 16
 70	  5	8047.8	556.4	 16
 71	  5	7663.0	597.4	 16
 72	  5	175.5	39.2	 16
 73	  5	89.5	19.4	 16
 74	  5	123.8	9.7	 16
 75	  5	122.5	11.1	 16
 76	  5	124.0	20.3	 16
 77	  5	134.0	24.7	 16
 78	  5	128.5	20.0	 16
 79	  5	80.8	16.2	 16
 80	  5	7950.5	717.7	 16
 81	  5	152.3	24.5	 16
 82	  5	123.0	17.9	 16
 83	  5	136.0	22.6	 16
 84	  5	7621.5	774.4	 16
 85	  5	109.8	22.1	 16
 86	  5	115.3	18.5	 16
 87	  5	133.5	15.4	 16
 88	  5	8092.3	837.4	 16
 89	  5	184.0	35.7	 16
 90	  5	142.3	15.7	 16
 91	  5	122.0	14.5	 16
 92	  5	195.5	22.7	 16
 93	  5	7337.8	813.7	 16
 94	  5	7164.0	461.2	 16
 95	  5	139.5	25.1	 20
 96	  5	123.0	18.8	 16
 97	  5	96.8	15.0	 16
 98	  5	137.0	21.9	 16
 99	  5	7870.3	714.2	 16
100	  5	7688.5	1700.7	 16
101	  5	122.5	18.6	 16
102	  5	124.5	15.5	 16
103	  5	88.5	16.8	 16
104	  5	137.5	15.5	 16
105	  5	130.0	18.3	 16
106	  5	7261.3	1312.4	 16
107	  5	117.5	12.5	 16
108	  5	142.8	32.4	 16
109	  5	68.3	10.8	 16
110	  5	62.0	10.5	 16
111	  5	150.8	31.5	 16
112	  5	588.3	96.0	 16
113	  5	82.3	13.5	 16
114	  5	91.3	19.0	 16
115	  5	213.3	20.5	 16
116	  5	116.3	15.3	 16
117	  5	256.3	28.4	 16
118	  5	9291.0	1594.4	 16
119	  5	558.3	88.0	 16
120	  5	109.8	20.0	 16
121	  5	110.8	16.7	 16
122	  5	75.3	12.9	 16
123	  5	85.3	12.1	 16
124	  5	75.5	14.9	 16
125	  5	95.5	17.1	 16
126	  5	1285.8	191.7	 16
127	  5	113.8	20.9	 16
128	  5	2137.8	412.0	 16
129	  5	531.5	93.1	 16
130	  5	309.5	43.5	 16
131	  5	437.3	76.2	 16
132	  5	97.5	15.2	 16
133	  5	347.3	30.7	 16
134	  5	237.0	36.0	 16
135	  5	221.0	41.5	 16
136	  5	78.3	14.8	 16
137	  5	82.5	15.0	 16
138	  5	71.0	9.2	 16
139	  5	1365.3	258.2	 16
140	  5	99.3	18.6	 16
141	  5	816.5	140.5	 16
142	  5	79.3	13.4	 16
143	  5	1512.0	262.4	 16
144	  5	210.3	30.5	 16
145	  5	89.5	18.6	 16
146	  5	154.5	29.2	 16
147	  5	1479.0	191.8	 16
148	  5	92.0	15.5	 16
149	  5	142.8	29.2	 16
150	  5	278.5	41.1	 16
151	  5	124.5	19.5	 16
152	  5	526.3	49.6	 16
153	  5	446.3	53.8	 16
154	  5	690.5	98.9	 16
155	  5	98.3	15.2	 16
156	  5	174.3	24.8	 16
157	  5	313.5	35.1	 16
158	  5	340.3	33.8	 16
159	  5	502.3	80.9	 16
160	  5	223.8	27.2	 16
161	  5	344.5	53.3	 16
162	  5	353.3	38.8	 16
163	  5	176.8	28.2	 16
164	  5	176.0	21.9	 16
165	  5	1765.5	174.8	 16
166	  5	368.3	33.3	 16
167	  5	194.5	20.7	 16
168	  5	93.0	16.4	 16
169	  5	609.3	79.1	 16
170	  5	256.8	31.0	 16
171	  5	369.3	38.2	 16
172	  5	676.0	80.2	 16
173	  5	88.0	15.1	 16
174	  5	1343.5	139.7	 16
175	  5	282.3	44.2	 16
176	  5	66.0	9.9	 16
177	  5	82.8	16.7	 16
178	  5	63.8	9.6	 16
179	  5	262.5	42.5	 16
180	  5	876.0	127.7	 16
181	  5	1426.8	192.3	 16
182	  5	215.8	25.9	 16
183	  5	109.5	16.2	 16
184	  5	64.0	11.0	 16
185	  5	1294.0	179.1	 16
186	  5	212.3	43.1	 16
187	  5	86.5	19.1	 16
188	  5	137.8	16.6	 16
189	  5	84.0	11.6	 16
190	  5	87.5	15.6	 16
191	  5	81.8	10.6	 16
192	  5	263.5	44.7	 16
193	  5	460.0	62.3	 16
194	  5	425.0	50.9	 16
195	  5	420.3	52.9	 16
196	  5	303.3	37.3	 16
197	  5	252.0	29.7	 16
198	  5	198.8	23.7	 16
199	  5	91.3	16.4	 16
200	  5	282.3	54.7	 16
201	  5	108.3	21.6	 16
202	  5	135.0	25.3	 16
203	  5	162.3	27.8	 16
204	  5	191.8	19.8	 16
205	  5	59.3	9.2	 16
206	  5	1226.5	166.5	 16
207	  5	64.5	13.1	 16
208	  5	74.0	11.3	 16
209	  5	200.5	38.4	 16
210	  5	442.5	52.4	 16
211	  5	82.8	19.7	 16
212	  5	113.8	17.7	 16
213	  5	551.3	58.1	 16
214	  5	1009.3	128.9	 16
215	  5	117.3	16.0	 16
216	  5	181.0	24.6	 16
217	  5	2101.5	262.5	 16
218	  5	112.5	13.2	 16
219	  5	63.5	10.1	 16
220	  5	55.3	10.8	 16
221	  5	307.3	46.2	 16
222	  5	156.3	26.7	 16
223	  5	117.0	16.2	 16
224	  5	325.3	44.4	 16
225	  5	66.0	10.0	 16
226	  5	249.0	32.4	 16
227	  5	615.5	100.9	 16
228	  5	115.3	18.7	 16
229	  5	441.8	39.5	 16
230	  5	96.8	15.3	 16
231	  5	452.0	58.3	 16
232	  5	71.3	19.5	 16
233	  5	299.0	42.4	 16
234	  5	71.3	13.3	 16
235	  5	742.3	129.9	 16
236	  5	71.3	11.9	 16
237	  5	130.5	17.2	 20
238	  5	169.8	26.5	 16
239	  5	809.3	159.1	 16
240	  5	104.5	21.9	 16
241	  5	100.0	13.9	 16
242	  5	111.3	20.0	 16
243	  5	360.5	53.8	 16
244	  5	133.8	27.2	 16
245	  5	818.8	140.5	 16
246	  5	702.0	135.0	 16
247	  5	316.8	76.4	 16
248	  5	398.8	58.7	 16
249	  5	138.0	17.9	 16
250	  5	102.0	20.2	 16
251	  5	4886.8	854.8	 16
252	  5	64.3	11.5	 16
253	  5	68.0	16.2	 16
254	  5	82.0	14.0	 16
255	  5	1047.3	171.0	 16
256	  5	1837.5	262.3	 16
257	  5	218.3	41.5	 16
258	  5	245.0	42.9	 16
259	  5	67.5	13.3	 16
260	  5	72.8	11.3	 16
261	  5	98.3	16.5	 16
262	  5	801.8	144.2	 16
263	  5	78.0	14.1	 16
264	  5	216.3	47.0	 16
265	  5	119.5	20.6	 16
266	  5	66.0	11.5	 16
267	  5	190.8	33.7	 16
268	  5	102.0	21.9	 16
269	  5	178.3	18.8	 16
270	  5	99.0	10.5	 16
271	  5	2031.8	308.4	 16
272	  5	661.5	99.0	 16
273	  5	105.3	20.3	 16
274	  5	106.5	17.6	 16
275	  5	115.0	18.5	 16
276	  5	78.5	16.2	 16
277	  5	68.0	10.9	 16
278	  5	611.8	88.9	 16
279	  5	173.8	37.6	 16
280	  5	165.3	15.4	 16
281	  5	1902.8	121.4	 16
282	  5	1943.5	181.7	 16
283	  5	754.8	79.9	 16
284	  5	177.5	21.5	 16
285	  5	883.8	77.2	 16
286	  5	126.3	105.7	 16
287	  5	216.5	24.9	 16
288	  5	395.3	44.0	 16
289	  5	279.0	25.0	 16
290	  5	3543.8	398.3	 16
291	  5	234.5	27.1	 16
292	  5	342.5	94.4	 16
293	  5	444.0	54.1	 16
294	  5	1889.3	203.5	 16
295	  5	926.3	60.5	 16
296	  5	403.3	38.9	 16
297	  5	393.8	26.8	 16
298	  5	361.5	28.0	 16
299	  5	235.3	46.1	 16
300	  5	5782.8	821.8	 16
301	  5	159.3	23.3	 16
302	  5	1089.3	111.8	 16
303	  5	2297.0	234.8	 16
304	  5	75.5	11.0	 16
305	  5	100.0	16.3	 16
306	  5	1516.0	122.9	 16
307	  5	75.0	14.8	 16
308	  5	620.5	56.0	 16
309	  5	220.8	29.9	 16
310	  5	156.3	26.5	 16
311	  5	418.3	42.9	 16
312	  5	534.0	71.2	 16
313	  5	812.8	72.2	 16
314	  5	428.8	41.3	 16
315	  5	362.0	41.1	 16
316	  5	170.5	17.5	 16
317	  5	416.5	44.2	 16
318	  5	566.0	66.3	 16
319	  5	161.3	26.5	 16
320	  5	70.8	14.7	 16
321	  5	192.3	33.5	 16
322	  5	108.5	11.4	 16
323	  5	109.0	21.7	 16
324	  5	228.5	19.8	 16
325	  5	179.8	29.8	 16
326	  5	344.3	24.3	 16
327	  5	294.8	34.3	 16
328	  5	75.3	15.1	 16
329	  5	546.3	75.8	 16
330	  5	1049.8	82.6	 16
331	  5	152.5	18.8	 16
332	  5	229.3	33.7	 16
333	  5	1222.8	119.1	 16
334	  5	410.0	61.9	 16
335	  5	89.0	18.2	 16
336	  5	170.8	30.3	 16
337	  5	100.5	17.6	 16
338	  5	99.5	14.8	 16
339	  5	68.5	11.9	 16
340	  5	195.3	21.4	 16
341	  5	491.8	88.3	 16
342	  5	70.0	11.6	 16
343	  5	78.0	18.4	 16
344	  5	118.0	18.8	 16
345	  5	139.3	16.9	 16
346	  5	137.0	17.2	 16
347	  5	4979.5	448.6	 16
348	  5	172.8	13.1	 16
349	  5	523.5	38.6	 16
350	  5	325.3	31.3	 16
351	  5	693.8	62.4	 16
352	  5	662.3	66.1	 16
353	  5	230.3	28.5	 16
354	  5	188.8	28.4	 16
355	  5	7752.8	538.4	 16
356	  5	87.5	10.8	 16
357	  5	557.8	60.4	 16
358	  5	209.0	32.5	 16
359	  5	109.8	17.6	 16
360	  5	157.5	31.9	 16
361	  5	283.8	36.1	 16
362	  5	1329.0	189.4	 16
363	  5	70.0	13.5	 16
364	  5	66.0	13.8	 16
365	  5	77.5	10.8	 16
366	  5	90.5	14.2	 16
367	  5	3448.3	431.2	 16
368	  5	422.0	85.2	 16
369	  5	658.0	114.0	 16
370	  5	88.3	16.7	 16
371	  5	375.0	48.2	 16
372	  5	483.3	77.0	 16
373	  5	166.0	27.3	 16
374	  5	92.0	18.1	 16
375	  5	110.8	13.5	 16
376	  5	125.8	21.7	 16
377	  5	122.5	17.5	 16
378	  5	160.3	24.8	 16
379	  5	163.5	33.1	 16
380	  5	198.8	31.8	 20
381	  5	109.0	15.7	 16
382	  5	395.3	43.7	 16
383	  5	724.5	98.3	 16
384	  5	121.3	21.7	 16
385	  5	182.3	28.8	 16
386	  5	399.5	51.9	 16
387	  5	662.0	78.8	 16
388	  5	726.0	97.4	 16
389	  5	2983.0	445.9	 16
390	  5	251.3	29.0	 16
391	  5	148.0	28.2	 16
392	  5	1508.8	168.3	 16
393	  5	160.5	33.0	 16
394	  5	306.3	29.9	 16
395	  5	93.8	15.7	 16
396	  5	69.8	11.8	 16
397	  5	309.8	32.9	 16
398	  5	1247.8	136.4	 16
399	  5	589.8	90.0	 16
400	  5	1111.8	118.3	 16
401	  5	333.5	40.3	 16
402	  5	197.3	28.1	 16
403	  5	69.0	13.3	 16
404	  5	533.8	74.7	 16
405	  5	68.3	13.2	 16
406	  5	165.0	20.4	 16
407	  5	211.8	30.7	 16
408	  5	251.8	34.0	 16
409	  5	82.0	10.4	 16
410	  5	171.3	18.6	 16
411	  5	264.8	37.0	 16
412	  5	79.5	14.8	 16
413	  5	186.0	29.2	 16
414	  5	253.8	54.7	 16
415	  5	11666.8	432.7	 16
416	  5	11941.3	1431.5	 16
417	  5	776.5	99.3	 16
418	  5	182.0	29.2	 16
419	  5	439.3	50.7	 16
420	  5	77.3	13.9	 16
421	  5	110.0	17.9	 16
422	  5	70.5	10.8	 16
423	  5	243.3	31.9	 16
424	  5	191.3	29.8	 16
425	  5	184.0	23.2	 16
426	  5	110.3	15.1	 16
427	  5	76.3	9.9	 16
428	  5	108.5	18.3	 16
429	  5	135.3	25.5	 16
430	  5	116.3	19.8	 16
431	  5	131.5	19.3	 16
432	  5	171.3	26.6	 16
433	  5	469.3	74.5	 16
434	  5	584.5	86.9	 16
435	  5	181.3	32.1	 16
436	  5	90.0	16.2	 16
437	  5	80.0	13.9	 16
438	  5	107.5	21.9	 16
439	  5	272.3	39.2	 16
440	  5	221.0	30.7	 16
441	  5	181.5	25.1	 16
442	  5	294.8	38.6	 16
443	  5	358.5	49.2	 16
444	  5	392.3	56.0	 16
445	  5	342.8	27.0	 16
446	  5	461.5	48.8	 16
447	  5	81.0	10.7	 16
448	  5	459.8	70.2	 16
449	  5	2988.5	288.2	 16
450	  5	1708.3	141.7	 16
451	  5	3459.0	503.6	 16
452	  5	536.0	63.4	 16
453	  5	348.5	39.4	 16
454	  5	1506.5	188.6	 16
455	  5	668.3	102.8	 16
456	  5	70.5	16.1	 16
457	  5	178.0	27.8	 16
458	  5	684.5	53.6	 16
459	  5	100.8	21.6	 16
460	  5	162.0	26.9	 16
461	  5	728.3	71.1	 16
462	  5	102.8	15.3	 16
463	  5	973.3	87.0	 16
464	  5	3158.0	168.0	 16
465	  5	878.8	68.4	 16
466	  5	124.0	14.9	 16
467	  5	100.8	16.1	 16
468	  5	125.0	24.3	 16
469	  5	218.5	32.1	 16
470	  5	135.0	25.4	 16
471	  5	90.5	12.3	 16
472	  5	279.3	201.9	 16
473	  5	212.0	20.9	 16
474	  5	81.8	14.2	 16
475	  5	78.5	13.9	 16
476	  5	365.0	36.9	 16
477	  5	139.3	16.5	 16
478	  5	432.0	50.7	 16
479	  5	690.3	72.3	 16
480	  5	154.5	22.1	 16
481	  5	205.5	30.0	 16
482	  5	324.0	36.6	 16
483	  5	80.0	13.5	 16
484	  5	232.0	28.5	 16
485	  5	1059.0	62.7	 16
486	  5	100.0	15.8	 16
487	  5	540.8	64.8	 16
488	  5	117.3	16.6	 16
489	  5	102.5	16.4	 16
490	  5	82.3	10.6	 16
491	  5	588.8	57.4	 16
492	  5	76.0	12.0	 16
493	  5	361.0	39.8	 16
494	  5	106.8	16.2	 16
495	  5	475.8	70.0	 16
496	  5	803.5	90.5	 16
497	  5	203.8	33.2	 16
498	  5	644.3	117.6	 16
499	  5	79.3	16.3	 16
500	  5	122.3	18.9	 16
501	  5	164.5	27.6	 16
502	  5	96.5	11.6	 16
503	  5	1811.3	160.9	 16
504	  5	122.8	18.7	 16
505	  5	737.3	103.0	 16
506	  5	76.0	11.5	 16
507	  5	67.8	12.9	 16
508	  5	498.8	59.1	 16
509	  5	6098.0	762.3	 16
510	  5	116.5	16.4	 16
511	  5	949.5	127.6	 16
512	  5	101.8	15.3	 16
513	  5	96.8	14.1	 16
514	  5	130.0	60.3	 16
515	  5	167.0	29.7	 16
516	  5	95.0	18.7	 16
517	  5	459.5	80.4	 16
518	  5	433.5	33.7	 16
519	  5	101.0	19.9	 16
520	  5	96.5	20.3	 16
521	  5	341.0	28.2	 16
522	  5	425.3	91.7	 20
523	  5	257.8	29.8	 16
524	  5	1436.0	188.7	 16
525	  5	68.5	14.0	 16
526	  5	232.5	57.3	 16
527	  5	1399.8	219.6	 16
528	  5	101.3	14.4	 16
529	  5	2303.5	394.3	 16
530	  5	616.8	81.6	 16
531	  5	236.5	43.2	 16
532	  5	125.0	25.2	 16
533	  5	285.0	34.5	 16
534	  5	212.8	33.2	 16
535	  5	183.5	25.2	 16
536	  5	1183.3	126.0	 16
537	  5	143.5	27.8	 16
538	  5	9758.5	830.9	 16
539	  5	3430.8	534.6	 16
540	  5	83.5	14.4	 16
541	  5	246.3	39.9	 16
542	  5	841.0	157.0	 16
543	  5	119.5	21.1	 16
544	  5	370.0	43.8	 16
545	  5	343.5	26.7	 16
546	  5	334.5	36.6	 16
547	  5	355.0	36.4	 16
548	  5	220.3	27.9	 16
549	  5	201.8	26.2	 16
550	  5	110.8	17.7	 16
551	  5	322.5	37.7	 16
552	  5	72.3	14.1	 16
553	  5	424.0	58.0	 16
554	  5	127.8	13.4	 16
555	  5	199.0	18.0	 16
556	  5	113.8	12.3	 16
557	  5	198.3	29.2	 16
558	  5	79.0	15.7	 16
559	  5	184.5	23.6	 16
560	  5	277.8	38.3	 16
561	  5	347.0	31.1	 16
562	  5	13965.0	1564.1	 16
563	  5	99.3	18.7	 16
564	  5	97.3	14.6	 16
565	  5	212.0	24.7	 16
566	  5	1553.5	156.0	 16
567	  5	2473.0	272.1	 16
568	  5	465.8	57.2	 16
569	  5	417.5	37.8	 16
570	  5	2183.5	183.0	 16
571	  5	91.0	9.5	 16
572	  5	435.8	70.9	 16
573	  5	90.0	16.1	 16
574	  5	105.8	13.7	 16
575	  5	493.3	53.7	 16
576	  5	428.0	34.1	 16
577	  5	120.3	19.4	 16
578	  5	487.8	53.3	 16
579	  5	3918.5	315.4	 16
580	  5	188.0	24.1	 16
581	  5	669.3	60.9	 16
582	  5	871.8	63.1	 16
583	  5	436.3	38.4	 16
584	  5	143.8	24.5	 16
585	  5	176.5	22.1	 16
586	  5	204.0	28.9	 16
587	  5	339.5	47.2	 16
588	  5	204.0	30.2	 16
589	  5	110.0	16.2	 16
590	  5	73.3	11.5	 16
591	  5	73.8	20.5	 16
592	  5	413.3	42.8	 16
593	  5	440.3	47.1	 16
594	  5	175.8	25.0	 16
595	  5	152.5	30.0	 16
596	  5	186.5	21.6	 16
597	  5	524.5	61.5	 16
598	  5	1049.0	90.7	 16
599	  5	60.0	10.1	 16
600	  5	216.5	32.4	 16
601	  5	473.5	49.1	 16
602	  5	1021.5	98.0	 16
603	  5	78.0	14.0	 16
604	  5	97.8	22.7	 16
605	  5	78.0	14.2	 16
606	  5	126.8	21.2	 16
607	  5	63.3	11.8	 16
608	  5	87.8	18.3	 16
609	  5	225.3	27.2	 16
610	  5	62.8	11.8	 16
611	  5	78.0	17.2	 16
612	  5	323.5	52.1	 16
613	  5	86.5	16.1	 16
614	  5	151.0	17.1	 16
615	  5	98.0	13.7	 16
616	  5	311.3	40.4	 16
617	  5	476.5	49.2	 16
618	  5	647.5	74.5	 16
619	  5	82.3	16.5	 16
620	  5	71.5	11.0	 16
621	  5	91.8	17.1	 16
622	  5	79.3	14.2	 16
623	  5	194.5	23.0	 16
624	  5	624.8	74.1	 16
625	  5	200.0	27.9	 16
626	  5	857.0	79.1	 16
627	  5	117.5	15.1	 16
628	  5	89.3	17.0	 16
629	  5	475.5	47.2	 16
630	  5	79.3	10.4	 16
631	  5	76.8	14.1	 16
632	  5	382.8	39.4	 16
633	  5	103.5	17.1	 16
634	  5	333.3	65.4	 16
635	  5	140.5	21.4	 16
636	  5	124.0	18.9	 16
637	  5	2016.5	274.8	 16
638	  5	566.3	32.1	 16
639	  5	151.8	19.9	 16
640	  5	260.5	37.6	 16
641	  5	85.3	12.6	 16
642	  5	91.0	19.1	 16
643	  5	294.5	64.1	 16
644	  5	481.3	65.0	 16
645	  5	362.0	47.3	 16
646	  5	198.0	36.7	 16
647	  5	61.5	11.8	 16
648	  5	1845.8	225.5	 16
649	  5	135.5	19.1	 16
650	  5	133.3	23.6	 16
651	  5	519.8	46.9	 16
652	  5	160.8	25.7	 16
653	  5	83.3	15.2	 16
654	  5	170.3	26.2	 16
655	  5	303.8	36.9	 16
656	  5	233.0	25.1	 16
657	  5	3878.8	423.6	 16
658	  5	113.5	25.6	 16
659	  5	823.0	91.8	 16
660	  5	593.8	48.9	 16
661	  5	1186.3	208.3	 16
662	  5	167.3	30.3	 16
663	  5	135.3	19.4	 16
664	  5	7206.0	1296.0	 20
665	  5	174.5	23.2	 16
666	  5	694.8	98.9	 16
667	  5	134.3	16.9	 16
668	  5	430.5	59.6	 16
669	  5	928.8	156.2	 16
670	  5	187.0	27.4	 16
671	  5	111.5	16.6	 16
672	  5	156.5	18.2	 16
673	  5	116.5	20.7	 16
674	  5	171.3	19.7	 16
675	  5	154.3	19.8	 16
676	  5	103.3	12.5	 16
677	  5	134.0	15.4	 16
678	  5	287.8	35.2	 16
679	  5	7576.8	1321.6	 16
680	  5	117.0	19.6	 16
681	  5	596.0	66.4	 16
682	  5	111.8	23.5	 16
683	  5	153.0	32.6	 16
684	  5	168.0	31.1	 16
685	  5	72.3	13.5	 16
686	  5	72.8	11.0	 16
687	  5	129.0	21.7	 16
688	  5	8775.0	1000.2	 16
689	  5	374.3	37.8	 16
690	  5	133.0	17.0	 16
691	  5	1552.8	205.6	 16
692	  5	213.3	30.2	 16
693	  5	452.5	62.4	 16
694	  5	491.0	49.7	 16
695	  5	303.3	31.3	 16
696	  5	144.0	20.1	 16
697	  5	136.8	15.1	 16
698	  5	97.0	13.3	 16
699	  5	1215.0	139.2	 16
700	  5	81.0	12.5	 16
701	  5	143.3	18.7	 16
702	  5	187.0	21.8	 16
703	  5	376.3	41.2	 16
704	  5	94.0	13.0	 16
705	  5	627.5	53.9	 16
706	  5	250.0	23.1	 16
707	  5	333.0	42.3	 16
708	  5	206.5	24.5	 16
709	  5	289.5	28.9	 16
710	  5	417.5	45.1	 16
711	  5	348.3	169.8	 16
  0	  6	10370.3	936.8	 16
  1	  6	131.5	23.0	 16
  2	  6	104.8	19.3	 16
  3	  6	160.3	11.1	 16
  4	  6	109.5	15.3	 16
  5	  6	179.0	24.7	 16
  6	  6	588.0	43.7	 16
  7	  6	143.5	19.8	 16
  8	  6	128.3	14.4	 16
  9	  6	474.8	48.1	 16
 10	  6	236.3	29.5	 16
 11	  6	101.3	14.7	 16
 12	  6	8373.0	370.0	 16
 13	  6	161.8	20.8	 16
 14	  6	156.0	24.6	 16
 15	  6	155.8	14.2	 16
 16	  6	8619.0	1202.2	 16
 17	  6	122.0	17.5	 16
 18	  6	167.8	24.2	 16
 19	  6	148.8	24.5	 16
 20	  6	158.3	16.5	 16
 21	  6	157.5	17.5	 16
 22	  6	159.0	19.1	 16
 23	  6	97.0	14.6	 16
 24	  6	150.8	22.5	 16
 25	  6	134.0	11.1	 16
 26	  6	168.0	30.0	 16
 27	  6	133.5	14.3	 16
 28	  6	152.8	21.1	 16
 29	  6	107.5	16.9	 16
 30	  6	137.5	13.0	 16
 31	  6	147.5	22.9	 16
 32	  6	164.0	28.6	 16
 33	  6	175.0	27.4	 16
 34	  6	137.0	13.1	 16
 35	  6	113.0	13.5	 16
 36	  6	8908.0	656.6	 16
 37	  6	175.5	27.8	 16
 38	  6	152.8	21.9	 16
 39	  6	157.5	21.9	 16
 40	  6	8032.3	1195.9	 16
 41	  6	122.3	13.2	 16
 42	  6	9510.3	615.0	 16
 43	  6	192.0	35.2	 16
 44	  6	155.3	20.7	 16
 45	  6	132.5	14.6	 16
 46	  6	130.8	16.9	 16
 47	  6	89.5	14.2	 16
 48	  6	140.0	19.1	 16
 49	  6	126.3	16.8	 16
 50	  6	133.8	17.4	 16
 51	  6	128.3	14.0	 16
 52	  6	139.5	12.7	 16
 53	  6	96.3	11.9	 16
 54	  6	132.0	18.6	 16
 55	  6	141.8	21.7	 16
 56	  6	155.8	28.4	 16
 57	  6	131.3	12.3	 16
 58	  6	148.0	22.4	 16
 59	  6	79.5	9.3	 16
 60	  6	92.5	16.0	 16
 61	  6	106.0	18.0	 16
 62	  6	9943.5	637.1	 16
 63	  6	173.3	29.2	 16
 64	  6	143.3	19.3	 16
 65	  6	160.5	37.3	 16
 66	  6	8340.5	727.8	 16
 67	  6	134.0	25.7	 16
 68	  6	9473.5	837.4	 16
 69	  6	172.0	29.9	 16
 70	  6	152.3	20.6	 16
 71	  6	154.0	24.8	 16
 72	  6	7522.0	687.9	 16
 73	  6	113.0	19.3	 16
 74	  6	121.3	12.4	 16
 75	  6	125.8	19.4	 16
 76	  6	119.8	12.6	 16
 77	  6	134.0	10.8	 16
 78	  6	133.3	24.1	 16
 79	  6	94.3	16.2	 16
 80	  6	8394.8	705.8	 16
 81	  6	169.5	21.3	 16
 82	  6	124.5	13.5	 16
 83	  6	133.5	15.6	 16
 84	  6	7752.8	817.9	 16
 85	  6	108.5	19.1	 16
 86	  6	142.0	27.9	 16
 87	  6	8500.0	1151.1	 16
 88	  6	8488.3	347.1	 16
 89	  6	161.0	25.5	 16
 90	  6	121.3	22.1	 16
 91	  6	88.8	9.7	 16
 92	  6	7662.5	850.0	 16
 93	  6	157.0	25.4	 16
 94	  6	137.3	21.7	 16
 95	  6	7780.5	931.4	 16
 96	  6	145.3	36.6	 16
 97	  6	84.3	17.1	 16
 98	  6	8327.0	961.6	 16
 99	  6	143.3	30.7	 20
100	  6	130.3	19.4	 16
101	  6	8133.0	1496.2	 16
102	  6	161.3	22.5	 16
103	  6	99.8	13.4	 16
104	  6	159.3	26.6	 16
105	  6	8195.8	1449.3	 16
106	  6	144.8	22.7	 16
107	  6	8391.5	1484.5	 16
108	  6	130.3	19.9	 16
109	  6	72.0	14.2	 16
110	  6	74.3	17.2	 16
111	  6	97.0	18.7	 16
112	  6	114.3	18.2	 16
113	  6	102.0	17.7	 16
114	  6	87.5	15.1	 16
115	  6	303.3	23.5	 16
116	  6	145.3	22.1	 16
117	  6	201.5	27.2	 16
118	  6	1300.3	250.1	 16
119	  6	372.3	58.4	 16
120	  6	103.3	14.6	 16
121	  6	116.0	19.4	 16
122	  6	77.3	12.4	 16
123	  6	76.3	12.3	 16
124	  6	81.8	13.5	 16
125	  6	86.3	13.5	 16
126	  6	131.3	15.3	 16
127	  6	93.0	19.2	 16
128	  6	300.0	39.5	 16
129	  6	242.5	35.7	 16
130	  6	227.0	44.8	 16
131	  6	464.0	72.8	 16
132	  6	87.8	13.7	 16
133	  6	258.3	33.9	 16
134	  6	141.0	24.2	 16
135	  6	123.0	20.7	 16
136	  6	92.5	16.6	 16
137	  6	109.8	14.6	 16
138	  6	69.5	14.7	 16
139	  6	462.8	79.1	 16
140	  6	63.8	11.7	 16
141	  6	118.0	19.2	 16
142	  6	70.0	13.6	 16
143	  6	237.0	43.0	 16
144	  6	90.8	13.9	 16
145	  6	89.0	11.9	 16
146	  6	137.0	20.4	 16
147	  6	351.8	64.0	 16
148	  6	85.5	12.4	 16
149	  6	63.3	10.9	 16
150	  6	129.3	22.3	 16
151	  6	93.5	15.5	 16
152	  6	179.8	25.6	 16
153	  6	153.0	31.0	 16
154	  6	104.5	15.5	 16
155	  6	133.5	20.1	 16
156	  6	113.5	20.8	 16
157	  6	268.5	55.2	 16
158	  6	128.8	14.9	 16
159	  6	200.3	25.8	 16
160	  6	173.8	21.3	 16
161	  6	243.8	170.6	 16
162	  6	231.8	24.5	 16
163	  6	222.8	19.7	 16
164	  6	230.5	30.8	 16
165	  6	146.0	22.6	 16
166	  6	194.5	29.2	 16
167	  6	108.8	18.5	 16
168	  6	93.3	11.1	 16
169	  6	145.3	20.7	 16
170	  6	104.0	17.5	 16
171	  6	296.3	36.1	 16
172	  6	121.3	20.7	 16
173	  6	75.8	14.4	 16
174	  6	261.3	40.1	 16
175	  6	86.5	16.5	 16
176	  6	66.5	12.4	 16
177	  6	67.5	11.0	 16
178	  6	58.3	9.4	 16
179	  6	94.3	16.9	 16
180	  6	294.3	36.4	 16
181	  6	155.0	17.2	 16
182	  6	168.0	31.7	 16
183	  6	146.8	21.6	 16
184	  6	74.8	17.1	 16
185	  6	298.3	28.5	 16
186	  6	119.0	22.2	 16
187	  6	95.3	12.5	 16
188	  6	121.8	19.9	 16
189	  6	92.3	22.4	 16
190	  6	91.5	13.7	 16
191	  6	63.5	9.9	 16
192	  6	133.8	23.2	 16
193	  6	115.3	17.5	 16
194	  6	120.0	16.0	 16
195	  6	117.5	26.5	 16
196	  6	168.3	37.2	 16
197	  6	256.0	48.0	 16
198	  6	386.3	42.9	 16
199	  6	349.3	74.2	 16
200	  6	429.3	40.8	 16
201	  6	230.8	26.6	 16
202	  6	241.0	35.0	 16
203	  6	98.3	17.3	 16
204	  6	86.3	13.8	 16
205	  6	60.5	9.4	 16
206	  6	152.3	18.9	 16
207	  6	79.5	20.2	 16
208	  6	67.5	10.0	 16
209	  6	167.5	19.4	 16
210	  6	154.3	27.8	 16
211	  6	97.3	16.7	 16
212	  6	111.5	14.3	 16
213	  6	92.5	12.2	 16
214	  6	294.5	37.8	 16
215	  6	106.8	20.9	 16
216	  6	120.3	19.4	 16
217	  6	412.5	78.5	 16
218	  6	59.3	13.0	 16
219	  6	66.0	10.4	 16
220	  6	83.3	12.2	 16
221	  6	98.8	15.3	 16
222	  6	95.8	22.3	 16
223	  6	151.8	31.3	 16
224	  6	99.3	16.1	 16
225	  6	62.3	11.3	 16
226	  6	82.3	9.8	 16
227	  6	166.5	26.5	 16
228	  6	97.3	17.7	 16
229	  6	333.0	35.4	 16
230	  6	81.0	10.1	 16
231	  6	100.0	15.5	 16
232	  6	80.5	14.5	 16
233	  6	108.8	17.0	 16
234	  6	77.8	13.6	 16
235	  6	232.3	33.6	 16
236	  6	98.0	138.1	 16
237	  6	64.5	13.9	 16
238	  6	116.8	22.5	 16
239	  6	296.5	49.5	 16
240	  6	80.3	8.0	 16
241	  6	63.8	9.3	 16
242	  6	98.5	16.4	 20
243	  6	147.8	21.3	 16
244	  6	101.5	13.7	 16
245	  6	147.8	14.0	 16
246	  6	130.8	23.0	 16
247	  6	61.0	12.2	 16
248	  6	103.0	13.9	 16
249	  6	101.5	16.1	 16
250	  6	79.3	12.9	 16
251	  6	659.8	154.7	 16
252	  6	64.3	9.4	 16
253	  6	66.3	9.6	 16
254	  6	86.3	20.6	 16
255	  6	309.3	44.9	 16
256	  6	605.5	163.2	 16
257	  6	113.5	13.0	 16
258	  6	92.3	20.8	 16
259	  6	57.5	9.7	 16
260	  6	67.5	12.3	 16
261	  6	64.5	16.5	 16
262	  6	102.8	13.2	 16
263	  6	71.5	8.6	 16
264	  6	92.5	20.0	 16
265	  6	71.0	11.5	 16
266	  6	62.8	12.6	 16
267	  6	72.3	13.6	 16
268	  6	82.3	14.2	 16
269	  6	77.0	11.4	 16
270	  6	70.5	12.6	 16
271	  6	239.8	28.7	 16
272	  6	161.5	17.1	 16
273	  6	104.8	13.6	 16
274	  6	81.5	17.2	 16
275	  6	73.0	14.9	 16
276	  6	66.3	28.7	 16
277	  6	61.3	9.8	 16
278	  6	125.0	20.5	 16
279	  6	64.0	9.6	 16
280	  6	119.0	26.9	 16
281	  6	794.5	94.7	 16
282	  6	795.8	90.4	 16
283	  6	379.3	46.8	 16
284	  6	141.0	16.4	 16
285	  6	453.0	65.0	 16
286	  6	66.3	11.3	 16
287	  6	83.3	14.5	 16
288	  6	401.0	50.6	 16
289	  6	298.3	39.8	 16
290	  6	238.8	34.2	 16
291	  6	100.0	17.7	 16
292	  6	120.5	18.4	 16
293	  6	148.5	17.8	 16
294	  6	180.5	25.7	 16
295	  6	129.3	18.1	 16
296	  6	217.0	30.0	 16
297	  6	342.8	26.1	 16
298	  6	211.0	31.7	 16
299	  6	149.8	25.0	 16
300	  6	1235.3	82.6	 16
301	  6	76.0	10.4	 16
302	  6	93.5	23.2	 16
303	  6	642.5	131.1	 16
304	  6	153.5	29.0	 16
305	  6	65.5	12.2	 16
306	  6	486.8	67.7	 16
307	  6	73.8	15.0	 16
308	  6	66.5	13.9	 16
309	  6	112.0	16.0	 16
310	  6	55.0	8.0	 16
311	  6	189.0	21.8	 16
312	  6	74.3	14.0	 16
313	  6	113.0	15.9	 16
314	  6	289.3	38.0	 16
315	  6	89.5	15.9	 16
316	  6	244.3	234.8	 16
317	  6	92.3	16.7	 16
318	  6	83.3	14.7	 16
319	  6	73.5	13.9	 16
320	  6	58.3	9.7	 16
321	  6	69.0	21.3	 16
322	  6	72.3	11.2	 16
323	  6	74.5	13.0	 16
324	  6	169.3	32.8	 16
325	  6	232.3	20.9	 16
326	  6	239.0	40.3	 16
327	  6	147.0	25.5	 16
328	  6	184.5	26.2	 16
329	  6	1017.8	113.2	 16
330	  6	293.8	42.9	 16
331	  6	104.5	14.4	 16
332	  6	109.3	13.3	 16
333	  6	459.0	43.9	 16
334	  6	90.0	16.9	 16
335	  6	73.3	11.2	 16
336	  6	84.0	17.4	 16
337	  6	139.8	24.5	 16
338	  6	90.0	9.7	 16
339	  6	71.0	10.3	 16
340	  6	206.3	20.9	 16
341	  6	116.5	30.4	 16
342	  6	65.3	14.3	 16
343	  6	63.5	12.4	 16
344	  6	103.3	11.6	 16
345	  6	67.5	17.2	 16
346	  6	80.5	17.7	 16
347	  6	1485.5	325.5	 16
348	  6	73.3	13.0	 16
349	  6	137.0	27.8	 16
350	  6	217.3	35.6	 16
351	  6	793.3	85.3	 16
352	  6	812.3	52.6	 16
353	  6	118.5	25.6	 16
354	  6	61.3	8.2	 16
355	  6	1606.5	241.1	 16
356	  6	77.3	14.8	 16
357	  6	111.3	18.5	 16
358	  6	93.0	15.5	 16
359	  6	107.8	15.0	 16
360	  6	91.5	16.8	 16
361	  6	280.5	23.8	 16
362	  6	389.8	45.4	 16
363	  6	67.3	10.2	 16
364	  6	66.5	11.6	 16
365	  6	69.5	11.1	 16
366	  6	67.8	10.8	 16
367	  6	288.0	52.2	 16
368	  6	81.8	19.2	 16
369	  6	100.0	18.2	 16
370	  6	108.3	19.3	 16
371	  6	510.8	59.5	 16
372	  6	179.8	35.2	 16
373	  6	142.5	21.0	 16
374	  6	74.3	11.4	 16
375	  6	85.8	12.7	 16
376	  6	94.0	35.9	 16
377	  6	98.5	23.3	 16
378	  6	123.5	22.9	 16
379	  6	155.8	18.9	 16
380	  6	181.0	27.7	 16
381	  6	172.0	23.9	 16
382	  6	198.0	33.0	 16
383	  6	775.3	93.1	 16
384	  6	80.0	18.9	 20
385	  6	113.8	17.0	 16
386	  6	127.0	22.5	 16
387	  6	194.5	31.5	 16
388	  6	220.3	32.4	 16
389	  6	1072.3	148.2	 16
390	  6	136.0	21.4	 16
391	  6	81.0	10.6	 16
392	  6	356.3	73.5	 16
393	  6	81.0	19.9	 16
394	  6	94.3	14.9	 16
395	  6	63.8	10.3	 16
396	  6	143.3	17.6	 16
397	  6	167.3	51.7	 16
398	  6	235.8	35.8	 16
399	  6	96.5	18.6	 16
400	  6	189.0	28.0	 16
401	  6	180.5	22.0	 16
402	  6	74.5	14.7	 16
403	  6	64.0	11.3	 16
404	  6	151.5	25.6	 16
405	  6	69.8	16.0	 16
406	  6	95.3	21.8	 16
407	  6	263.0	27.1	 16
408	  6	183.5	26.7	 16
409	  6	91.3	14.4	 16
410	  6	242.3	30.2	 16
411	  6	239.0	38.2	 16
412	  6	94.0	12.8	 16
413	  6	109.3	16.5	 16
414	  6	154.0	24.3	 16
415	  6	2263.3	444.6	 16
416	  6	2329.0	585.6	 16
417	  6	104.5	16.2	 16
418	  6	197.5	20.8	 16
419	  6	345.0	57.8	 16
420	  6	70.0	11.7	 16
421	  6	67.3	13.6	 16
422	  6	67.3	9.4	 16
423	  6	76.5	13.5	 16
424	  6	89.3	14.6	 16
425	  6	224.8	24.6	 16
426	  6	99.3	17.7	 16
427	  6	70.5	14.8	 16
428	  6	98.0	11.2	 16
429	  6	128.3	20.6	 16
430	  6	77.8	15.3	 16
431	  6	91.5	16.3	 16
432	  6	297.5	54.2	 16
433	  6	191.8	30.6	 16
434	  6	111.5	24.8	 16
435	  6	84.3	15.0	 16
436	  6	66.0	11.7	 16
437	  6	99.3	25.1	 16
438	  6	92.0	16.9	 16
439	  6	257.8	45.2	 16
440	  6	176.0	23.6	 16
441	  6	146.0	15.8	 16
442	  6	322.3	46.5	 16
443	  6	200.3	25.9	 16
444	  6	177.8	21.0	 16
445	  6	182.8	23.2	 16
446	  6	160.3	23.6	 16
447	  6	72.3	10.4	 16
448	  6	1545.8	179.7	 16
449	  6	429.0	53.0	 16
450	  6	404.3	37.4	 16
451	  6	365.0	49.9	 16
452	  6	192.5	21.5	 16
453	  6	140.8	22.8	 16
454	  6	738.5	86.6	 16
455	  6	73.3	11.8	 16
456	  6	86.8	18.3	 16
457	  6	100.8	15.7	 16
458	  6	352.8	66.3	 16
459	  6	163.3	20.3	 16
460	  6	63.5	10.3	 16
461	  6	145.0	19.3	 16
462	  6	78.0	14.5	 16
463	  6	204.5	28.8	 16
464	  6	1765.3	267.3	 16
465	  6	702.5	47.1	 16
466	  6	172.0	27.3	 16
467	  6	126.0	20.4	 16
468	  6	109.3	16.9	 16
469	  6	200.8	24.5	 16
470	  6	98.5	15.1	 16
471	  6	138.5	21.5	 16
472	  6	235.0	46.9	 16
473	  6	174.5	25.6	 16
474	  6	71.8	13.7	 16
475	  6	59.5	7.7	 16
476	  6	71.3	12.9	 16
477	  6	111.3	18.3	 16
478	  6	106.3	18.8	 16
479	  6	126.3	30.0	 16
480	  6	76.5	14.4	 16
481	  6	128.0	31.5	 16
482	  6	156.5	25.3	 16
483	  6	82.0	22.1	 16
484	  6	148.0	23.8	 16
485	  6	358.8	55.2	 16
486	  6	125.3	20.3	 16
487	  6	262.3	39.4	 16
488	  6	84.0	13.2	 16
489	  6	106.5	12.0	 16
490	  6	112.5	20.1	 16
491	  6	129.3	21.1	 16
492	  6	72.8	14.0	 16
493	  6	70.3	13.0	 16
494	  6	66.3	12.7	 16
495	  6	252.3	37.1	 16
496	  6	782.3	73.2	 16
497	  6	141.0	25.2	 16
498	  6	189.3	23.1	 16
499	  6	74.5	10.9	 16
500	  6	113.5	17.3	 16
501	  6	258.0	43.5	 16
502	  6	122.0	38.8	 16
503	  6	1153.8	208.0	 16
504	  6	97.8	14.1	 16
505	  6	334.3	78.0	 16
506	  6	86.0	16.2	 16
507	  6	84.3	12.3	 16
508	  6	659.3	103.3	 16
509	  6	2411.3	264.5	 16
510	  6	146.5	23.1	 16
511	  6	142.3	22.0	 16
512	  6	94.5	21.6	 16
513	  6	88.3	14.8	 16
514	  6	64.5	11.3	 16
515	  6	68.3	15.2	 16
516	  6	68.5	10.5	 16
517	  6	172.5	27.3	 16
518	  6	113.5	22.2	 16
519	  6	87.3	13.2	 16
520	  6	97.3	22.1	 16
521	  6	278.5	43.9	 16
522	  6	118.3	26.3	 16
523	  6	410.3	64.8	 16
524	  6	855.5	128.8	 16
525	  6	66.8	13.8	 16
526	  6	1317.0	295.7	 20
527	  6	110.3	19.0	 16
528	  6	87.8	15.3	 16
529	  6	259.5	60.0	 16
530	  6	143.3	19.9	 16
531	  6	155.8	14.4	 16
532	  6	189.5	32.2	 16
533	  6	149.0	33.5	 16
534	  6	128.5	23.1	 16
535	  6	194.5	17.9	 16
536	  6	831.8	94.3	 16
537	  6	154.0	18.1	 16
538	  6	4230.0	540.8	 16
539	  6	800.0	110.5	 16
540	  6	62.0	10.2	 16
541	  6	167.5	22.3	 16
542	  6	244.3	32.8	 16
543	  6	80.8	25.9	 16
544	  6	229.8	27.7	 16
545	  6	316.0	59.0	 16
546	  6	321.3	49.8	 16
547	  6	324.0	41.2	 16
548	  6	281.8	42.8	 16
549	  6	247.3	33.2	 16
550	  6	153.3	22.1	 16
551	  6	152.8	23.2	 16
552	  6	69.3	13.6	 16
553	  6	69.3	18.7	 16
554	  6	59.3	11.8	 16
555	  6	81.8	16.1	 16
556	  6	73.8	12.4	 16
557	  6	70.5	9.3	 16
558	  6	93.3	16.8	 16
559	  6	114.8	15.9	 16
560	  6	306.8	39.3	 16
561	  6	100.3	13.6	 16
562	  6	4596.8	595.5	 16
563	  6	125.8	27.4	 16
564	  6	99.8	12.0	 16
565	  6	122.3	19.6	 16
566	  6	543.3	54.3	 16
567	  6	293.8	45.8	 16
568	  6	99.5	16.9	 16
569	  6	157.8	29.8	 16
570	  6	757.8	146.2	 16
571	  6	92.5	14.2	 16
572	  6	152.0	29.0	 16
573	  6	99.0	14.2	 16
574	  6	126.8	14.3	 16
575	  6	80.0	11.0	 16
576	  6	120.3	21.8	 16
577	  6	63.3	13.1	 16
578	  6	82.0	13.2	 16
579	  6	966.8	103.6	 16
580	  6	290.0	31.2	 16
581	  6	669.0	56.2	 16
582	  6	841.5	88.1	 16
583	  6	465.3	29.9	 16
584	  6	189.5	30.2	 16
585	  6	195.3	21.0	 16
586	  6	157.3	23.4	 16
587	  6	169.0	22.5	 16
588	  6	79.5	21.6	 16
589	  6	68.8	16.9	 16
590	  6	68.3	9.1	 16
591	  6	69.3	12.2	 16
592	  6	399.8	65.3	 16
593	  6	247.5	36.8	 16
594	  6	173.0	27.4	 16
595	  6	88.3	13.1	 16
596	  6	88.3	26.9	 16
597	  6	115.5	18.3	 16
598	  6	117.0	13.9	 16
599	  6	60.3	16.1	 16
600	  6	82.5	13.5	 16
601	  6	107.5	16.5	 16
602	  6	158.5	33.8	 16
603	  6	68.3	11.8	 16
604	  6	69.8	16.5	 16
605	  6	60.0	8.4	 16
606	  6	72.0	13.9	 16
607	  6	73.5	13.5	 16
608	  6	74.0	15.9	 16
609	  6	190.3	29.0	 16
610	  6	60.3	10.4	 16
611	  6	74.8	12.8	 16
612	  6	84.0	11.4	 16
613	  6	64.5	10.9	 16
614	  6	164.8	22.6	 16
615	  6	92.3	11.2	 16
616	  6	86.3	14.6	 16
617	  6	124.8	24.9	 16
618	  6	83.0	14.1	 16
619	  6	55.3	8.0	 16
620	  6	89.8	22.3	 16
621	  6	74.3	13.2	 16
622	  6	76.3	13.0	 16
623	  6	179.5	21.6	 16
624	  6	150.3	19.3	 16
625	  6	104.3	14.3	 16
626	  6	1769.5	158.7	 16
627	  6	210.5	34.1	 16
628	  6	73.3	11.6	 16
629	  6	193.8	18.4	 16
630	  6	62.8	10.1	 16
631	  6	61.5	11.5	 16
632	  6	128.5	16.0	 16
633	  6	123.8	44.3	 16
634	  6	149.0	22.7	 16
635	  6	91.0	9.5	 16
636	  6	81.5	17.4	 16
637	  6	535.8	84.9	 16
638	  6	1072.5	162.7	 16
639	  6	79.3	16.2	 16
640	  6	103.3	19.0	 16
641	  6	70.3	15.1	 16
642	  6	75.3	12.7	 16
643	  6	89.5	14.4	 16
644	  6	220.3	26.5	 16
645	  6	166.0	20.0	 16
646	  6	91.8	16.0	 16
647	  6	67.5	11.4	 16
648	  6	353.3	52.7	 16
649	  6	108.0	10.9	 16
650	  6	112.5	15.4	 16
651	  6	470.8	57.8	 16
652	  6	187.5	26.0	 16
653	  6	91.3	9.6	 16
654	  6	134.3	18.4	 16
655	  6	290.5	30.1	 16
656	  6	302.5	30.0	 16
657	  6	1522.3	318.9	 16
658	  6	80.5	14.1	 16
659	  6	441.0	59.6	 16
660	  6	250.0	40.4	 16
661	  6	181.0	27.7	 16
662	  6	111.0	29.5	 16
663	  6	76.3	11.3	 16
664	  6	2780.8	650.1	 16
665	  6	244.8	45.3	 16
666	  6	302.5	36.4	 16
667	  6	101.3	9.9	 16
668	  6	228.8	31.4	 16
669	  6	123.0	19.4	 20
670	  6	80.3	12.3	 16
671	  6	110.5	24.4	 16
672	  6	250.3	67.6	 16
673	  6	84.5	16.3	 16
674	  6	135.5	20.0	 16
675	  6	64.3	10.8	 16
676	  6	83.0	17.1	 16
677	  6	78.0	11.9	 16
678	  6	83.0	18.6	 16
679	  6	706.8	207.8	 16
680	  6	79.3	12.5	 16
681	  6	288.0	25.3	 16
682	  6	118.0	19.0	 16
683	  6	99.5	14.5	 16
684	  6	93.3	11.7	 16
685	  6	73.8	10.8	 16
686	  6	93.5	17.3	 16
687	  6	115.3	15.8	 16
688	  6	2232.3	449.1	 16
689	  6	230.5	31.4	 16
690	  6	201.3	28.7	 16
691	  6	473.5	69.3	 16
692	  6	133.3	15.4	 16
693	  6	227.8	31.9	 16
694	  6	130.3	34.6	 16
695	  6	166.0	15.8	 16
696	  6	145.8	15.5	 16
697	  6	145.3	19.8	 16
698	  6	91.0	16.9	 16
699	  6	153.0	13.5	 16
700	  6	75.8	11.1	 16
701	  6	108.8	15.2	 16
702	  6	115.5	20.7	 16
703	  6	188.5	34.2	 16
704	  6	98.0	17.1	 16
705	  6	232.5	43.7	 16
706	  6	238.5	35.5	 16
707	  6	263.0	29.6	 16
708	  6	195.0	24.8	 16
709	  6	269.8	22.5	 16
710	  6	320.3	41.8	 16
711	  6	8373.8	1161.6	 16
  0	  7	159.8	29.7	 16
  1	  7	396.8	37.2	 16
  2	  7	176.5	26.1	 16
  3	  7	301.5	33.2	 16
  4	  7	132.0	18.3	 16
  5	  7	251.8	30.9	 16
  6	  7	134.3	20.5	 16
  7	  7	219.5	35.1	 16
  8	  7	755.5	65.7	 16
  9	  7	604.3	49.1	 16
 10	  7	236.0	26.7	 16
 11	  7	113.0	14.8	 16
 12	  7	8643.8	558.3	 16
 13	  7	174.5	18.5	 16
 14	  7	156.8	22.7	 16
 15	  7	160.3	20.3	 16
 16	  7	168.0	24.8	 16
 17	  7	128.5	13.6	 16
 18	  7	174.3	25.3	 16
 19	  7	8731.5	609.1	 16
 20	  7	8625.3	582.2	 16
 21	  7	8158.5	737.2	 16
 22	  7	159.3	14.8	 16
 23	  7	115.5	22.5	 16
 24	  7	9168.3	760.4	 16
 25	  7	181.5	21.6	 16
 26	  7	8395.3	408.1	 16
 27	  7	7869.0	696.0	 16
 28	  7	160.5	17.7	 16
 29	  7	113.0	12.4	 16
 30	  7	132.5	23.8	 16
 31	  7	8779.5	716.8	 16
 32	  7	8308.5	827.4	 16
 33	  7	8280.8	1101.1	 16
 34	  7	155.5	22.7	 16
 35	  7	115.0	15.0	 16
 36	  7	9577.3	826.3	 16
 37	  7	170.5	22.7	 16
 38	  7	143.3	17.1	 16
 39	  7	140.3	16.9	 16
 40	  7	159.5	18.3	 16
 41	  7	128.8	21.7	 16
 42	  7	9533.5	646.3	 16
 43	  7	203.0	16.7	 16
 44	  7	8628.5	498.1	 16
 45	  7	7911.3	759.3	 16
 46	  7	147.5	22.3	 16
 47	  7	100.3	17.1	 16
 48	  7	141.3	23.1	 16
 49	  7	124.8	18.7	 16
 50	  7	7031.3	977.8	 16
 51	  7	145.3	14.0	 16
 52	  7	122.8	14.1	 16
 53	  7	93.5	10.0	 16
 54	  7	8771.0	947.8	 16
 55	  7	9025.8	910.0	 16
 56	  7	8476.8	1446.1	 16
 57	  7	159.5	23.1	 16
 58	  7	137.3	23.3	 16
 59	  7	84.5	12.9	 16
 60	  7	94.0	16.4	 16
 61	  7	99.3	12.8	 16
 62	  7	10413.3	621.7	 16
 63	  7	192.3	28.6	 16
 64	  7	145.5	16.4	 16
 65	  7	171.3	14.0	 16
 66	  7	8674.0	708.0	 16
 67	  7	124.3	25.1	 16
 68	  7	10106.0	677.0	 16
 69	  7	168.3	29.4	 16
 70	  7	142.8	14.0	 16
 71	  7	130.5	19.5	 16
 72	  7	148.5	25.9	 16
 73	  7	95.3	11.5	 16
 74	  7	132.3	15.8	 16
 75	  7	144.0	20.4	 16
 76	  7	117.8	19.8	 16
 77	  7	135.8	25.2	 16
 78	  7	109.3	11.5	 16
 79	  7	104.0	19.0	 16
 80	  7	8791.5	618.6	 16
 81	  7	178.0	27.8	 16
 82	  7	121.8	19.9	 16
 83	  7	132.3	23.3	 16
 84	  7	7781.5	730.1	 16
 85	  7	118.3	26.4	 16
 86	  7	122.3	16.7	 16
 87	  7	129.5	21.3	 16
 88	  7	8255.8	782.2	 16
 89	  7	148.8	19.9	 16
 90	  7	134.5	15.9	 16
 91	  7	84.0	17.8	 16
 92	  7	122.3	17.5	 16
 93	  7	117.3	20.1	 16
 94	  7	145.0	17.4	 16
 95	  7	8233.3	899.6	 16
 96	  7	141.0	24.5	 16
 97	  7	81.0	10.4	 16
 98	  7	127.3	20.1	 16
 99	  7	125.5	21.7	 16
100	  7	135.8	19.1	 16
101	  7	7954.0	1667.8	 16
102	  7	155.8	26.7	 16
103	  7	118.5	15.0	 16
104	  7	176.3	22.5	 20
105	  7	8741.3	1586.6	 16
106	  7	156.8	22.9	 16
107	  7	8818.5	1561.2	 16
108	  7	142.0	19.5	 16
109	  7	86.5	14.1	 16
110	  7	76.3	15.3	 16
111	  7	109.0	16.2	 16
112	  7	261.5	36.5	 16
113	  7	121.0	31.0	 16
114	  7	75.5	13.4	 16
115	  7	116.0	18.5	 16
116	  7	805.8	163.0	 16
117	  7	201.5	31.5	 16
118	  7	147.0	23.7	 16
119	  7	313.3	29.0	 16
120	  7	262.3	54.4	 16
121	  7	660.0	55.8	 16
122	  7	342.0	50.9	 16
123	  7	702.8	130.2	 16
124	  7	156.5	26.7	 16
125	  7	613.5	55.2	 16
126	  7	10136.8	851.1	 16
127	  7	11083.0	763.9	 16
128	  7	11274.3	1925.9	 16
129	  7	305.0	46.2	 16
130	  7	115.0	36.5	 16
131	  7	4703.3	811.9	 16
132	  7	194.3	28.3	 16
133	  7	2719.5	442.4	 16
134	  7	971.5	139.3	 16
135	  7	532.3	148.7	 16
136	  7	494.0	51.7	 16
137	  7	135.8	16.3	 16
138	  7	127.0	19.5	 16
139	  7	210.5	35.4	 16
140	  7	72.8	10.9	 16
141	  7	77.8	17.0	 16
142	  7	104.3	13.9	 16
143	  7	492.0	77.3	 16
144	  7	183.8	24.0	 16
145	  7	1253.3	220.6	 16
146	  7	90.3	16.3	 16
147	  7	115.3	16.7	 16
148	  7	135.0	24.0	 16
149	  7	127.0	42.2	 16
150	  7	95.8	8.6	 16
151	  7	127.0	20.8	 16
152	  7	382.3	55.9	 16
153	  7	440.0	67.2	 16
154	  7	228.5	36.7	 16
155	  7	110.3	14.1	 16
156	  7	1257.5	113.9	 16
157	  7	1193.3	93.9	 16
158	  7	222.5	34.7	 16
159	  7	228.8	20.7	 16
160	  7	155.3	19.2	 16
161	  7	227.5	32.0	 16
162	  7	124.0	18.8	 16
163	  7	119.8	17.8	 16
164	  7	213.8	37.3	 16
165	  7	290.5	35.9	 16
166	  7	87.8	13.4	 16
167	  7	245.0	25.8	 16
168	  7	111.0	19.9	 16
169	  7	399.0	47.4	 16
170	  7	511.0	39.5	 16
171	  7	527.5	56.6	 16
172	  7	73.3	18.2	 16
173	  7	125.0	19.3	 16
174	  7	1795.0	182.9	 16
175	  7	91.3	11.4	 16
176	  7	188.3	25.9	 16
177	  7	89.0	13.2	 16
178	  7	98.0	11.9	 16
179	  7	100.0	22.8	 16
180	  7	312.5	34.7	 16
181	  7	124.3	25.2	 16
182	  7	1100.8	114.1	 16
183	  7	88.8	14.8	 16
184	  7	109.5	19.8	 16
185	  7	99.3	17.1	 16
186	  7	124.3	24.1	 16
187	  7	155.3	32.7	 16
188	  7	150.3	25.0	 16
189	  7	285.3	51.5	 16
190	  7	158.0	16.6	 16
191	  7	106.5	26.3	 16
192	  7	191.3	32.9	 16
193	  7	178.3	21.4	 16
194	  7	193.5	21.2	 16
195	  7	104.8	18.4	 16
196	  7	77.8	19.4	 16
197	  7	67.3	11.6	 16
198	  7	159.5	22.9	 16
199	  7	3674.8	333.8	 16
200	  7	485.0	50.8	 16
201	  7	170.0	20.7	 16
202	  7	151.5	32.3	 16
203	  7	208.0	27.1	 16
204	  7	275.5	41.5	 16
205	  7	66.5	11.9	 16
206	  7	227.3	26.5	 16
207	  7	85.8	10.8	 16
208	  7	208.8	25.8	 16
209	  7	83.3	15.2	 16
210	  7	84.5	19.6	 16
211	  7	100.8	13.8	 16
212	  7	231.5	38.6	 16
213	  7	551.3	59.6	 16
214	  7	652.0	64.5	 16
215	  7	389.5	58.1	 16
216	  7	212.8	33.2	 16
217	  7	351.8	33.9	 16
218	  7	239.8	45.4	 16
219	  7	73.3	10.7	 16
220	  7	326.8	42.8	 16
221	  7	219.3	34.0	 16
222	  7	1489.8	157.0	 16
223	  7	139.5	32.0	 16
224	  7	79.5	14.1	 16
225	  7	177.0	25.1	 16
226	  7	341.3	42.1	 16
227	  7	197.0	27.8	 16
228	  7	227.0	23.3	 16
229	  7	76.8	17.7	 16
230	  7	88.8	15.9	 16
231	  7	1468.3	202.5	 16
232	  7	218.5	26.0	 16
233	  7	117.5	20.2	 16
234	  7	84.0	16.7	 16
235	  7	113.0	18.0	 16
236	  7	429.5	48.6	 16
237	  7	67.0	9.0	 16
238	  7	62.3	11.4	 16
239	  7	1306.3	179.3	 16
240	  7	67.5	10.3	 16
241	  7	126.3	74.9	 16
242	  7	666.3	99.3	 16
243	  7	631.8	49.0	 16
244	  7	1242.0	174.0	 16
245	  7	73.3	17.1	 16
246	  7	63.0	13.3	 20
247	  7	122.5	19.8	 16
248	  7	173.3	30.1	 16
249	  7	128.5	22.4	 16
250	  7	71.3	10.9	 16
251	  7	141.0	20.1	 16
252	  7	518.3	104.0	 16
253	  7	73.5	17.4	 16
254	  7	252.5	41.4	 16
255	  7	82.0	22.8	 16
256	  7	85.0	13.2	 16
257	  7	117.0	12.1	 16
258	  7	75.5	14.3	 16
259	  7	184.3	30.7	 16
260	  7	249.0	33.2	 16
261	  7	236.3	28.3	 16
262	  7	127.3	26.6	 16
263	  7	6116.3	1042.7	 16
264	  7	122.3	21.0	 16
265	  7	84.8	15.4	 16
266	  7	85.5	15.3	 16
267	  7	1186.0	230.8	 16
268	  7	1284.0	192.1	 16
269	  7	66.8	12.7	 16
270	  7	68.0	12.1	 16
271	  7	163.8	24.4	 16
272	  7	578.3	90.7	 16
273	  7	217.8	40.4	 16
274	  7	155.3	23.9	 16
275	  7	123.0	26.8	 16
276	  7	252.3	37.8	 16
277	  7	133.8	29.0	 16
278	  7	594.5	103.1	 16
279	  7	86.5	16.3	 16
280	  7	74.3	12.3	 16
281	  7	96.3	24.1	 16
282	  7	4516.8	654.6	 16
283	  7	94.8	14.8	 16
284	  7	261.3	49.5	 16
285	  7	268.3	34.9	 16
286	  7	92.0	17.0	 16
287	  7	1730.3	314.7	 16
288	  7	276.0	360.1	 16
289	  7	209.0	28.6	 16
290	  7	162.5	29.4	 16
291	  7	494.8	67.2	 16
292	  7	70.0	12.3	 16
293	  7	240.5	25.7	 16
294	  7	166.5	20.0	 16
295	  7	138.8	21.9	 16
296	  7	120.0	20.4	 16
297	  7	162.8	21.0	 16
298	  7	350.5	39.5	 16
299	  7	258.3	26.7	 16
300	  7	271.0	38.1	 16
301	  7	1445.8	159.9	 16
302	  7	67.3	17.4	 16
303	  7	251.0	27.3	 16
304	  7	126.8	23.5	 16
305	  7	76.5	16.5	 16
306	  7	2044.8	159.1	 16
307	  7	92.0	18.9	 16
308	  7	299.3	41.7	 16
309	  7	112.3	15.4	 16
310	  7	109.8	17.3	 16
311	  7	194.0	19.9	 16
312	  7	385.0	35.9	 16
313	  7	219.3	25.3	 16
314	  7	330.0	52.3	 16
315	  7	389.3	46.8	 16
316	  7	1347.8	107.3	 16
317	  7	302.0	29.0	 16
318	  7	80.3	10.3	 16
319	  7	185.0	35.5	 16
320	  7	67.8	14.5	 16
321	  7	1302.0	209.7	 16
322	  7	177.8	28.2	 16
323	  7	121.8	15.7	 16
324	  7	355.8	32.9	 16
325	  7	485.3	70.6	 16
326	  7	2633.8	160.9	 16
327	  7	307.3	35.6	 16
328	  7	77.3	11.5	 16
329	  7	192.0	27.1	 16
330	  7	1019.3	74.5	 16
331	  7	148.0	22.2	 16
332	  7	174.3	19.0	 16
333	  7	10836.3	772.4	 16
334	  7	11328.5	468.6	 16
335	  7	233.0	21.4	 16
336	  7	78.0	12.7	 16
337	  7	77.3	15.1	 16
338	  7	84.8	11.5	 16
339	  7	143.5	18.4	 16
340	  7	143.3	17.9	 16
341	  7	78.8	15.4	 16
342	  7	334.0	53.4	 16
343	  7	96.0	15.3	 16
344	  7	140.0	19.5	 16
345	  7	172.8	37.8	 16
346	  7	245.8	18.8	 16
347	  7	458.3	39.3	 16
348	  7	253.3	30.4	 16
349	  7	77.3	15.3	 16
350	  7	92.3	17.0	 16
351	  7	83.3	12.6	 16
352	  7	999.3	115.8	 16
353	  7	176.5	27.8	 16
354	  7	63.8	12.2	 16
355	  7	89.0	15.2	 16
356	  7	178.0	31.2	 16
357	  7	275.3	38.9	 16
358	  7	2497.0	150.9	 16
359	  7	290.0	26.8	 16
360	  7	386.8	42.5	 16
361	  7	113.8	29.3	 16
362	  7	166.5	30.0	 16
363	  7	124.5	24.3	 16
364	  7	61.5	11.8	 16
365	  7	90.5	25.5	 16
366	  7	285.8	49.6	 16
367	  7	268.3	41.2	 16
368	  7	91.0	14.6	 16
369	  7	140.8	27.0	 16
370	  7	316.3	40.4	 16
371	  7	369.8	41.7	 16
372	  7	548.0	66.5	 16
373	  7	230.0	26.6	 16
374	  7	392.0	47.3	 16
375	  7	60.3	6.1	 16
376	  7	158.5	29.0	 16
377	  7	102.8	33.1	 16
378	  7	182.5	32.0	 16
379	  7	1481.3	187.1	 16
380	  7	662.8	95.5	 16
381	  7	330.5	50.5	 16
382	  7	303.3	52.6	 16
383	  7	1806.8	177.8	 16
384	  7	166.0	52.7	 16
385	  7	86.8	11.1	 16
386	  7	107.5	16.7	 16
387	  7	188.0	29.2	 16
388	  7	248.3	50.5	 20
389	  7	69.0	13.8	 16
390	  7	89.0	15.1	 16
391	  7	547.0	93.3	 16
392	  7	72.3	7.3	 16
393	  7	71.3	9.2	 16
394	  7	260.5	27.6	 16
395	  7	391.8	46.1	 16
396	  7	928.0	64.0	 16
397	  7	1002.0	117.3	 16
398	  7	72.8	16.9	 16
399	  7	69.3	12.2	 16
400	  7	105.0	15.8	 16
401	  7	420.5	29.3	 16
402	  7	1223.8	197.7	 16
403	  7	211.0	28.0	 16
404	  7	93.3	11.6	 16
405	  7	80.5	11.9	 16
406	  7	1436.0	204.6	 16
407	  7	132.8	24.7	 16
408	  7	65.8	8.9	 16
409	  7	134.8	24.3	 16
410	  7	164.8	28.8	 16
411	  7	270.5	37.8	 16
412	  7	293.8	37.5	 16
413	  7	1810.3	243.2	 16
414	  7	67.3	8.1	 16
415	  7	365.3	59.1	 16
416	  7	105.8	17.8	 16
417	  7	294.3	51.6	 16
418	  7	822.3	128.9	 16
419	  7	72.8	15.7	 16
420	  7	53.0	12.9	 16
421	  7	54.0	10.9	 16
422	  7	61.5	13.0	 16
423	  7	202.0	27.4	 16
424	  7	631.8	96.6	 16
425	  7	161.0	24.6	 16
426	  7	432.3	35.7	 16
427	  7	523.3	89.8	 16
428	  7	347.8	51.4	 16
429	  7	85.3	10.7	 16
430	  7	65.8	12.4	 16
431	  7	91.3	11.1	 16
432	  7	356.0	66.7	 16
433	  7	67.3	13.2	 16
434	  7	206.3	21.3	 16
435	  7	175.5	31.9	 16
436	  7	259.5	33.8	 16
437	  7	104.3	14.2	 16
438	  7	248.8	42.8	 16
439	  7	72.0	12.7	 16
440	  7	129.8	14.7	 16
441	  7	612.3	67.4	 16
442	  7	160.8	20.5	 16
443	  7	529.5	62.1	 16
444	  7	363.5	70.1	 16
445	  7	97.0	19.1	 16
446	  7	216.0	35.7	 16
447	  7	531.5	51.0	 16
448	  7	511.0	50.0	 16
449	  7	293.8	44.4	 16
450	  7	527.0	48.9	 16
451	  7	115.0	21.3	 16
452	  7	319.3	28.3	 16
453	  7	433.8	56.3	 16
454	  7	648.3	52.0	 16
455	  7	263.3	23.3	 16
456	  7	222.3	42.3	 16
457	  7	62.3	10.7	 16
458	  7	135.3	19.9	 16
459	  7	406.5	63.0	 16
460	  7	649.8	44.4	 16
461	  7	90.8	16.0	 16
462	  7	1213.0	140.3	 16
463	  7	76.8	11.8	 16
464	  7	72.0	15.8	 16
465	  7	75.3	10.7	 16
466	  7	257.0	39.5	 16
467	  7	171.0	20.0	 16
468	  7	89.5	15.6	 16
469	  7	74.8	15.6	 16
470	  7	223.0	25.7	 16
471	  7	191.3	28.7	 16
472	  7	89.3	18.5	 16
473	  7	97.0	14.4	 16
474	  7	54.5	8.6	 16
475	  7	196.3	27.5	 16
476	  7	58.0	8.5	 16
477	  7	233.8	36.4	 16
478	  7	78.3	15.5	 16
479	  7	134.8	26.8	 16
480	  7	66.5	8.5	 16
481	  7	77.3	13.4	 16
482	  7	604.3	72.3	 16
483	  7	654.3	89.6	 16
484	  7	216.0	34.1	 16
485	  7	190.3	33.4	 16
486	  7	216.0	27.8	 16
487	  7	220.0	40.0	 16
488	  7	315.8	40.5	 16
489	  7	68.3	15.2	 16
490	  7	121.3	16.6	 16
491	  7	68.5	11.2	 16
492	  7	96.8	17.0	 16
493	  7	231.8	46.9	 16
494	  7	174.0	20.1	 16
495	  7	737.0	63.2	 16
496	  7	83.0	12.7	 16
497	  7	170.3	22.3	 16
498	  7	138.8	23.9	 16
499	  7	603.5	67.1	 16
500	  7	258.3	40.4	 16
501	  7	129.0	19.3	 16
502	  7	921.8	75.1	 16
503	  7	1062.8	69.9	 16
504	  7	287.3	55.8	 16
505	  7	748.3	95.2	 16
506	  7	270.8	36.7	 16
507	  7	262.8	33.0	 16
508	  7	135.3	23.3	 16
509	  7	214.0	27.6	 16
510	  7	139.8	15.3	 16
511	  7	301.8	41.8	 16
512	  7	141.0	25.7	 16
513	  7	71.0	11.9	 16
514	  7	62.8	9.9	 16
515	  7	75.0	14.1	 16
516	  7	73.5	14.5	 16
517	  7	1292.0	155.4	 16
518	  7	146.3	20.9	 16
519	  7	163.5	27.9	 16
520	  7	88.8	16.2	 16
521	  7	171.0	42.2	 16
522	  7	234.5	50.0	 16
523	  7	116.0	21.6	 16
524	  7	291.8	46.4	 16
525	  7	89.5	17.6	 16
526	  7	54.0	9.9	 16
527	  7	70.3	15.0	 16
528	  7	66.8	14.9	 16
529	  7	367.5	51.2	 16
530	  7	166.5	29.4	 16
531	  7	101.3	17.2	 20
532	  7	302.0	44.1	 16
533	  7	74.8	17.6	 16
534	  7	111.0	17.9	 16
535	  7	88.5	17.7	 16
536	  7	782.8	139.4	 16
537	  7	411.3	69.4	 16
538	  7	458.0	78.3	 16
539	  7	2674.5	320.1	 16
540	  7	354.5	45.8	 16
541	  7	101.3	16.4	 16
542	  7	91.8	17.1	 16
543	  7	70.3	13.1	 16
544	  7	77.5	14.1	 16
545	  7	98.0	19.7	 16
546	  7	373.3	64.0	 16
547	  7	388.3	77.2	 16
548	  7	491.8	67.6	 16
549	  7	285.0	37.6	 16
550	  7	78.8	14.7	 16
551	  7	129.5	17.8	 16
552	  7	217.5	36.9	 16
553	  7	93.8	18.1	 16
554	  7	249.3	45.2	 16
555	  7	71.3	10.9	 16
556	  7	84.8	15.2	 16
557	  7	136.5	22.1	 16
558	  7	257.8	52.3	 16
559	  7	700.0	76.6	 16
560	  7	67.3	13.1	 16
561	  7	129.8	19.8	 16
562	  7	451.3	48.2	 16
563	  7	700.5	87.1	 16
564	  7	107.8	16.3	 16
565	  7	406.0	52.5	 16
566	  7	57.3	10.4	 16
567	  7	73.5	14.7	 16
568	  7	603.3	109.1	 16
569	  7	184.3	38.4	 16
570	  7	110.5	23.1	 16
571	  7	96.8	11.7	 16
572	  7	113.3	21.7	 16
573	  7	120.0	18.8	 16
574	  7	143.8	24.0	 16
575	  7	849.5	79.1	 16
576	  7	90.5	15.3	 16
577	  7	864.8	85.2	 16
578	  7	97.8	18.1	 16
579	  7	126.3	20.9	 16
580	  7	296.8	40.6	 16
581	  7	152.3	25.6	 16
582	  7	662.3	79.4	 16
583	  7	57.0	11.4	 16
584	  7	335.8	50.8	 16
585	  7	404.8	38.7	 16
586	  7	76.5	13.1	 16
587	  7	118.0	16.5	 16
588	  7	117.5	13.2	 16
589	  7	164.3	18.5	 16
590	  7	170.0	20.2	 16
591	  7	80.5	16.2	 16
592	  7	3312.0	283.0	 16
593	  7	2121.5	162.2	 16
594	  7	67.3	8.7	 16
595	  7	55.3	8.6	 16
596	  7	154.5	16.9	 16
597	  7	82.8	14.4	 16
598	  7	480.5	59.9	 16
599	  7	66.3	10.8	 16
600	  7	64.5	18.4	 16
601	  7	64.3	13.9	 16
602	  7	93.3	14.8	 16
603	  7	116.0	19.1	 16
604	  7	961.3	103.2	 16
605	  7	88.3	15.2	 16
606	  7	211.3	30.2	 16
607	  7	147.8	17.5	 16
608	  7	58.3	11.6	 16
609	  7	304.3	35.9	 16
610	  7	664.3	81.7	 16
611	  7	2407.3	357.1	 16
612	  7	180.3	21.4	 16
613	  7	207.0	35.3	 16
614	  7	117.8	16.9	 16
615	  7	135.8	25.1	 16
616	  7	103.8	17.8	 16
617	  7	311.0	34.3	 16
618	  7	75.3	9.6	 16
619	  7	235.8	28.4	 16
620	  7	503.3	44.0	 16
621	  7	917.5	88.5	 16
622	  7	179.8	26.7	 16
623	  7	182.5	19.2	 16
624	  7	74.5	11.2	 16
625	  7	1025.0	104.2	 16
626	  7	124.3	23.9	 16
627	  7	630.3	68.2	 16
628	  7	457.3	68.5	 16
629	  7	86.8	19.2	 16
630	  7	355.8	51.0	 16
631	  7	658.0	74.0	 16
632	  7	260.8	29.0	 16
633	  7	309.3	31.8	 16
634	  7	163.8	38.8	 16
635	  7	282.0	51.4	 16
636	  7	274.8	49.6	 16
637	  7	1213.8	201.7	 16
638	  7	73.0	10.1	 16
639	  7	394.0	69.9	 16
640	  7	67.0	11.9	 16
641	  7	172.5	31.4	 16
642	  7	517.5	70.1	 16
643	  7	71.8	9.8	 16
644	  7	416.8	41.2	 16
645	  7	111.0	18.9	 16
646	  7	242.8	36.8	 16
647	  7	473.8	46.3	 16
648	  7	358.5	35.3	 16
649	  7	1655.3	210.7	 16
650	  7	135.5	21.9	 16
651	  7	145.0	20.0	 16
652	  7	138.0	19.1	 16
653	  7	230.5	32.4	 16
654	  7	288.8	54.4	 16
655	  7	225.5	43.1	 16
656	  7	81.0	12.8	 16
657	  7	137.5	23.8	 16
658	  7	146.3	37.2	 16
659	  7	1012.3	142.2	 16
660	  7	157.8	23.2	 16
661	  7	282.0	36.3	 16
662	  7	109.3	13.8	 16
663	  7	550.3	100.5	 16
664	  7	496.3	79.5	 16
665	  7	276.8	35.3	 16
666	  7	251.5	33.7	 16
667	  7	287.3	35.8	 16
668	  7	920.3	120.7	 16
669	  7	257.8	32.6	 16
670	  7	866.5	132.9	 16
671	  7	101.8	17.2	 16
672	  7	82.0	16.5	 16
673	  7	74.5	11.4	 20
674	  7	103.5	16.9	 16
675	  7	97.5	16.1	 16
676	  7	2056.5	410.2	 16
677	  7	82.8	14.6	 16
678	  7	900.0	188.5	 16
679	  7	344.5	59.6	 16
680	  7	203.3	25.0	 16
681	  7	293.0	29.8	 16
682	  7	146.8	24.9	 16
683	  7	294.3	51.7	 16
684	  7	219.0	28.3	 16
685	  7	240.3	32.1	 16
686	  7	280.0	36.3	 16
687	  7	5288.3	687.0	 16
688	  7	266.5	23.2	 16
689	  7	200.0	27.1	 16
690	  7	161.0	28.4	 16
691	  7	250.0	43.9	 16
692	  7	206.3	31.7	 16
693	  7	919.3	100.3	 16
694	  7	136.3	19.5	 16
695	  7	110.8	22.9	 16
696	  7	65.8	13.2	 16
697	  7	74.8	10.5	 16
698	  7	138.3	20.0	 16
699	  7	411.3	58.4	 16
700	  7	170.0	28.0	 16
701	  7	115.0	20.9	 16
702	  7	139.3	19.8	 16
703	  7	86.5	11.9	 16
704	  7	100.5	15.1	 16
705	  7	95.0	14.9	 16
706	  7	280.8	23.2	 16
707	  7	293.3	31.0	 16
708	  7	151.8	26.0	 16
709	  7	262.8	27.3	 16
710	  7	338.5	37.1	 16
711	  7	184.0	33.8	 16
  0	  8	10244.8	1152.7	 16
  1	  8	169.0	21.6	 16
  2	  8	171.0	21.3	 16
  3	  8	276.3	35.2	 16
  4	  8	134.0	22.7	 16
  5	  8	124.0	15.1	 16
  6	  8	116.0	19.3	 16
  7	  8	104.5	14.3	 16
  8	  8	204.3	23.8	 16
  9	  8	633.0	46.0	 16
 10	  8	233.0	35.8	 16
 11	  8	112.3	16.4	 16
 12	  8	8627.5	470.2	 16
 13	  8	161.3	20.9	 16
 14	  8	146.8	15.7	 16
 15	  8	7598.0	1022.6	 16
 16	  8	8646.0	474.0	 16
 17	  8	126.8	17.4	 16
 18	  8	9929.0	607.2	 16
 19	  8	181.0	20.2	 16
 20	  8	181.8	19.7	 16
 21	  8	193.3	34.7	 16
 22	  8	8809.8	704.1	 16
 23	  8	116.8	16.4	 16
 24	  8	9998.8	289.1	 16
 25	  8	9329.3	932.2	 16
 26	  8	162.0	26.6	 16
 27	  8	152.0	16.9	 16
 28	  8	8274.3	596.0	 16
 29	  8	113.5	11.6	 16
 30	  8	9750.0	897.6	 16
 31	  8	200.3	28.9	 16
 32	  8	155.8	16.7	 16
 33	  8	158.8	27.9	 16
 34	  8	8754.3	1572.9	 16
 35	  8	116.0	14.7	 16
 36	  8	9565.3	871.9	 16
 37	  8	150.0	26.8	 16
 38	  8	128.0	20.2	 16
 39	  8	140.3	24.9	 16
 40	  8	139.0	21.8	 16
 41	  8	105.5	14.8	 16
 42	  8	9675.0	324.1	 16
 43	  8	9130.0	971.8	 16
 44	  8	165.0	23.3	 16
 45	  8	145.0	20.3	 16
 46	  8	8297.0	638.6	 16
 47	  8	97.3	15.3	 16
 48	  8	143.5	20.5	 16
 49	  8	142.0	25.1	 16
 50	  8	137.0	15.8	 16
 51	  8	147.3	17.0	 16
 52	  8	133.0	18.4	 16
 53	  8	102.5	18.3	 16
 54	  8	9154.5	586.0	 16
 55	  8	156.0	23.2	 16
 56	  8	141.5	13.5	 16
 57	  8	7939.3	1293.8	 16
 58	  8	132.5	11.9	 16
 59	  8	88.0	10.4	 16
 60	  8	88.3	13.5	 16
 61	  8	86.3	16.3	 16
 62	  8	10630.5	539.3	 16
 63	  8	9910.5	832.1	 16
 64	  8	8733.0	782.3	 16
 65	  8	8534.0	668.1	 16
 66	  8	9481.8	1095.1	 16
 67	  8	135.0	28.6	 16
 68	  8	10111.0	762.9	 16
 69	  8	163.8	33.4	 16
 70	  8	136.5	18.0	 16
 71	  8	7262.5	767.4	 16
 72	  8	8247.3	820.4	 16
 73	  8	128.3	26.5	 16
 74	  8	124.3	13.2	 16
 75	  8	7991.5	913.8	 16
 76	  8	7631.0	838.6	 16
 77	  8	7297.5	987.6	 16
 78	  8	156.5	23.2	 16
 79	  8	107.3	18.2	 16
 80	  8	8841.3	614.4	 16
 81	  8	172.5	35.0	 16
 82	  8	130.0	19.9	 16
 83	  8	123.3	21.8	 16
 84	  8	7751.8	728.0	 16
 85	  8	113.5	18.8	 16
 86	  8	119.8	17.3	 16
 87	  8	127.5	14.7	 16
 88	  8	8127.0	736.3	 16
 89	  8	154.8	28.9	 16
 90	  8	109.0	16.7	 16
 91	  8	79.3	11.7	 16
 92	  8	134.5	24.4	 16
 93	  8	8021.3	798.5	 16
 94	  8	7983.3	479.7	 16
 95	  8	139.0	22.0	 16
 96	  8	127.0	17.2	 16
 97	  8	92.0	13.5	 16
 98	  8	116.8	16.2	 16
 99	  8	8026.8	1055.0	 16
100	  8	7971.5	1698.3	 16
101	  8	149.3	37.7	 16
102	  8	147.5	20.9	 16
103	  8	99.3	13.4	 16
104	  8	151.5	16.2	 16
105	  8	9240.0	1612.9	 16
106	  8	8891.3	1255.5	 16
107	  8	8886.3	1265.6	 16
108	  8	134.0	22.6	 20
109	  8	77.5	17.5	 16
110	  8	63.3	9.4	 16
111	  8	65.3	9.0	 16
112	  8	106.0	12.6	 16
113	  8	215.5	31.0	 16
114	  8	79.5	12.4	 16
115	  8	96.3	14.0	 16
116	  8	202.8	29.6	 16
117	  8	146.5	18.4	 16
118	  8	107.3	21.9	 16
119	  8	244.3	41.2	 16
120	  8	241.5	32.0	 16
121	  8	444.5	38.2	 16
122	  8	246.8	43.3	 16
123	  8	129.3	25.0	 16
124	  8	119.3	51.7	 16
125	  8	976.5	147.1	 16
126	  8	1890.5	390.0	 16
127	  8	2053.3	314.7	 16
128	  8	2034.0	443.8	 16
129	  8	104.5	18.3	 16
130	  8	102.8	25.8	 16
131	  8	874.0	178.4	 16
132	  8	86.3	11.8	 16
133	  8	493.3	137.2	 16
134	  8	3741.0	490.8	 16
135	  8	932.8	76.0	 16
136	  8	341.0	48.6	 16
137	  8	149.8	31.6	 16
138	  8	157.0	22.7	 16
139	  8	88.3	13.0	 16
140	  8	66.5	16.8	 16
141	  8	84.3	15.4	 16
142	  8	115.0	21.3	 16
143	  8	128.3	20.6	 16
144	  8	91.0	17.5	 16
145	  8	235.8	54.0	 16
146	  8	75.3	9.2	 16
147	  8	90.8	16.6	 16
148	  8	85.8	17.0	 16
149	  8	89.8	12.4	 16
150	  8	85.3	13.1	 16
151	  8	99.8	17.5	 16
152	  8	105.3	16.3	 16
153	  8	141.8	28.1	 16
154	  8	158.3	21.0	 16
155	  8	109.5	32.0	 16
156	  8	598.5	47.2	 16
157	  8	647.8	76.7	 16
158	  8	181.5	18.2	 16
159	  8	292.3	32.8	 16
160	  8	186.3	26.6	 16
161	  8	92.3	17.3	 16
162	  8	212.3	28.2	 16
163	  8	118.0	18.9	 16
164	  8	111.5	16.4	 16
165	  8	167.5	22.1	 16
166	  8	71.5	13.9	 16
167	  8	77.3	11.2	 16
168	  8	101.8	16.9	 16
169	  8	131.5	28.4	 16
170	  8	115.8	26.1	 16
171	  8	109.0	15.6	 16
172	  8	80.0	14.5	 16
173	  8	90.3	17.6	 16
174	  8	128.8	21.7	 16
175	  8	89.0	16.7	 16
176	  8	77.8	11.1	 16
177	  8	67.0	9.1	 16
178	  8	91.3	21.5	 16
179	  8	93.0	17.1	 16
180	  8	337.3	56.0	 16
181	  8	96.8	17.5	 16
182	  8	164.5	22.6	 16
183	  8	76.3	22.8	 16
184	  8	67.8	12.9	 16
185	  8	93.5	16.5	 16
186	  8	136.0	19.0	 16
187	  8	82.0	13.1	 16
188	  8	94.3	11.1	 16
189	  8	191.3	35.0	 16
190	  8	90.3	17.5	 16
191	  8	94.0	24.1	 16
192	  8	95.3	17.0	 16
193	  8	85.5	17.5	 16
194	  8	187.3	25.0	 16
195	  8	77.8	11.7	 16
196	  8	90.0	14.7	 16
197	  8	71.3	25.2	 16
198	  8	117.8	24.3	 16
199	  8	381.5	47.1	 16
200	  8	200.8	45.8	 16
201	  8	99.3	16.9	 16
202	  8	108.5	19.2	 16
203	  8	93.0	15.8	 16
204	  8	116.0	17.6	 16
205	  8	66.0	12.8	 16
206	  8	104.8	14.9	 16
207	  8	79.0	16.5	 16
208	  8	94.8	13.8	 16
209	  8	57.3	10.3	 16
210	  8	69.8	13.6	 16
211	  8	248.8	36.6	 16
212	  8	78.8	10.8	 16
213	  8	218.3	27.3	 16
214	  8	218.5	40.7	 16
215	  8	109.8	19.8	 16
216	  8	94.5	14.6	 16
217	  8	99.0	15.8	 16
218	  8	96.0	17.1	 16
219	  8	58.0	6.4	 16
220	  8	104.5	23.6	 16
221	  8	115.0	20.2	 16
222	  8	85.0	13.2	 16
223	  8	84.8	16.9	 16
224	  8	69.8	12.9	 16
225	  8	216.3	36.5	 16
226	  8	276.5	36.9	 16
227	  8	152.5	27.3	 16
228	  8	177.8	36.3	 16
229	  8	59.3	10.1	 16
230	  8	79.5	10.0	 16
231	  8	123.5	18.4	 16
232	  8	85.8	16.3	 16
233	  8	93.3	14.4	 16
234	  8	74.3	9.8	 16
235	  8	107.8	14.9	 16
236	  8	157.5	17.6	 16
237	  8	68.5	16.7	 16
238	  8	68.5	8.7	 16
239	  8	389.3	59.9	 16
240	  8	69.0	13.1	 16
241	  8	101.3	20.6	 16
242	  8	265.5	29.7	 16
243	  8	236.5	42.9	 16
244	  8	112.8	16.6	 16
245	  8	71.5	10.9	 16
246	  8	63.0	9.3	 16
247	  8	67.0	11.3	 16
248	  8	82.0	14.1	 16
249	  8	83.8	13.9	 16
250	  8	83.0	14.0	 20
251	  8	343.0	60.1	 16
252	  8	304.0	57.4	 16
253	  8	73.5	11.6	 16
254	  8	78.5	17.1	 16
255	  8	75.5	12.1	 16
256	  8	67.5	14.8	 16
257	  8	155.5	26.7	 16
258	  8	57.3	8.5	 16
259	  8	100.3	21.3	 16
260	  8	122.8	17.1	 16
261	  8	155.0	22.4	 16
262	  8	87.3	13.6	 16
263	  8	2192.0	470.4	 16
264	  8	111.5	26.0	 16
265	  8	89.3	15.2	 16
266	  8	68.3	9.6	 16
267	  8	255.5	45.5	 16
268	  8	386.3	66.7	 16
269	  8	61.3	11.2	 16
270	  8	70.5	15.2	 16
271	  8	306.5	41.9	 16
272	  8	283.0	46.5	 16
273	  8	80.0	9.7	 16
274	  8	88.8	16.9	 16
275	  8	88.3	12.9	 16
276	  8	360.8	39.2	 16
277	  8	166.3	24.3	 16
278	  8	154.3	31.0	 16
279	  8	75.3	16.4	 16
280	  8	74.3	13.2	 16
281	  8	93.5	18.8	 16
282	  8	1143.8	242.4	 16
283	  8	137.8	23.7	 16
284	  8	79.3	12.5	 16
285	  8	67.3	12.3	 16
286	  8	81.0	11.7	 16
287	  8	150.5	35.4	 16
288	  8	131.3	22.5	 16
289	  8	261.8	36.5	 16
290	  8	200.3	37.3	 16
291	  8	116.3	24.3	 16
292	  8	79.5	17.3	 16
293	  8	187.3	16.3	 16
294	  8	135.3	26.1	 16
295	  8	158.5	32.5	 16
296	  8	129.8	18.4	 16
297	  8	111.3	18.0	 16
298	  8	291.8	46.7	 16
299	  8	208.0	33.5	 16
300	  8	271.5	24.3	 16
301	  8	235.3	43.2	 16
302	  8	62.3	11.7	 16
303	  8	91.5	33.1	 16
304	  8	93.3	16.5	 16
305	  8	63.5	10.3	 16
306	  8	512.0	58.6	 16
307	  8	73.8	12.1	 16
308	  8	97.8	10.0	 16
309	  8	99.0	24.4	 16
310	  8	104.8	16.1	 16
311	  8	205.3	23.9	 16
312	  8	154.5	22.9	 16
313	  8	307.5	37.2	 16
314	  8	337.5	36.4	 16
315	  8	175.3	20.1	 16
316	  8	283.8	37.8	 16
317	  8	109.8	16.4	 16
318	  8	81.3	17.2	 16
319	  8	66.3	12.2	 16
320	  8	68.3	16.6	 16
321	  8	280.3	42.0	 16
322	  8	118.0	19.2	 16
323	  8	107.0	18.5	 16
324	  8	215.8	37.1	 16
325	  8	354.8	57.6	 16
326	  8	1311.0	215.5	 16
327	  8	132.0	16.5	 16
328	  8	77.0	16.1	 16
329	  8	153.0	16.7	 16
330	  8	853.5	70.1	 16
331	  8	157.3	16.2	 16
332	  8	115.5	20.7	 16
333	  8	3284.0	407.0	 16
334	  8	3633.8	389.8	 16
335	  8	127.8	15.3	 16
336	  8	81.0	15.4	 16
337	  8	68.5	11.5	 16
338	  8	88.3	25.8	 16
339	  8	100.8	50.2	 16
340	  8	138.8	21.8	 16
341	  8	83.0	15.5	 16
342	  8	107.5	16.1	 16
343	  8	62.3	15.4	 16
344	  8	86.0	16.0	 16
345	  8	110.0	20.7	 16
346	  8	231.5	26.5	 16
347	  8	866.5	130.0	 16
348	  8	192.3	24.2	 16
349	  8	92.8	17.2	 16
350	  8	102.8	19.0	 16
351	  8	65.0	10.8	 16
352	  8	220.8	37.8	 16
353	  8	82.5	10.8	 16
354	  8	67.0	15.0	 16
355	  8	199.5	43.6	 16
356	  8	126.3	17.1	 16
357	  8	184.3	18.0	 16
358	  8	1330.5	84.2	 16
359	  8	211.0	25.7	 16
360	  8	136.0	22.1	 16
361	  8	63.0	9.6	 16
362	  8	69.5	17.1	 16
363	  8	80.3	19.4	 16
364	  8	67.0	12.6	 16
365	  8	63.3	12.0	 16
366	  8	234.0	41.1	 16
367	  8	147.3	37.1	 16
368	  8	94.0	13.4	 16
369	  8	141.3	21.7	 16
370	  8	142.5	24.4	 16
371	  8	130.3	17.5	 16
372	  8	227.0	40.5	 16
373	  8	177.5	35.0	 16
374	  8	82.0	12.3	 16
375	  8	71.5	13.6	 16
376	  8	70.8	18.3	 16
377	  8	93.8	13.9	 16
378	  8	266.5	24.2	 16
379	  8	273.3	46.8	 16
380	  8	193.0	27.5	 16
381	  8	84.3	12.5	 16
382	  8	95.5	14.0	 16
383	  8	1114.5	334.3	 16
384	  8	199.5	44.0	 16
385	  8	85.5	16.4	 16
386	  8	79.5	16.0	 16
387	  8	196.8	24.6	 16
388	  8	216.0	35.4	 16
389	  8	64.5	11.3	 16
390	  8	74.0	18.5	 16
391	  8	70.0	14.3	 16
392	  8	67.3	14.1	 16
393	  8	74.0	16.5	 20
394	  8	205.8	31.5	 16
395	  8	272.5	41.5	 16
396	  8	403.5	54.0	 16
397	  8	422.8	54.1	 16
398	  8	82.3	11.9	 16
399	  8	73.0	11.2	 16
400	  8	91.3	15.7	 16
401	  8	584.8	74.5	 16
402	  8	105.5	16.8	 16
403	  8	81.3	17.3	 16
404	  8	90.0	18.1	 16
405	  8	62.5	11.2	 16
406	  8	201.5	30.9	 16
407	  8	70.0	12.6	 16
408	  8	77.3	10.8	 16
409	  8	99.3	15.3	 16
410	  8	101.5	18.4	 16
411	  8	291.5	31.6	 16
412	  8	138.8	25.9	 16
413	  8	218.0	29.3	 16
414	  8	58.0	13.7	 16
415	  8	167.8	31.2	 16
416	  8	61.5	12.7	 16
417	  8	66.5	8.9	 16
418	  8	125.3	25.5	 16
419	  8	58.3	7.0	 16
420	  8	57.8	9.0	 16
421	  8	60.3	10.9	 16
422	  8	59.0	9.4	 16
423	  8	130.5	17.6	 16
424	  8	537.5	61.5	 16
425	  8	131.0	20.9	 16
426	  8	563.0	67.4	 16
427	  8	91.3	20.9	 16
428	  8	80.8	11.1	 16
429	  8	80.0	12.2	 16
430	  8	108.8	21.2	 16
431	  8	98.5	21.3	 16
432	  8	113.0	22.0	 16
433	  8	62.3	12.5	 16
434	  8	123.3	22.4	 16
435	  8	122.0	15.4	 16
436	  8	97.3	10.1	 16
437	  8	158.8	21.4	 16
438	  8	296.0	27.1	 16
439	  8	87.8	17.6	 16
440	  8	87.5	13.4	 16
441	  8	97.8	22.9	 16
442	  8	83.5	17.0	 16
443	  8	193.3	25.6	 16
444	  8	101.0	16.2	 16
445	  8	90.3	16.9	 16
446	  8	120.3	16.3	 16
447	  8	140.0	13.7	 16
448	  8	327.8	51.9	 16
449	  8	2160.8	165.8	 16
450	  8	293.5	27.4	 16
451	  8	71.3	12.2	 16
452	  8	201.8	26.0	 16
453	  8	152.3	27.9	 16
454	  8	332.0	33.4	 16
455	  8	129.8	25.0	 16
456	  8	136.3	20.0	 16
457	  8	68.5	13.1	 16
458	  8	69.0	9.5	 16
459	  8	82.5	14.2	 16
460	  8	264.3	36.1	 16
461	  8	63.3	12.1	 16
462	  8	128.3	21.9	 16
463	  8	80.0	11.6	 16
464	  8	70.0	14.0	 16
465	  8	71.3	9.9	 16
466	  8	67.5	7.2	 16
467	  8	135.5	19.2	 16
468	  8	84.8	13.9	 16
469	  8	71.5	13.6	 16
470	  8	117.8	15.5	 16
471	  8	53.5	11.1	 16
472	  8	83.3	10.6	 16
473	  8	182.8	25.3	 16
474	  8	60.3	11.9	 16
475	  8	72.0	15.4	 16
476	  8	62.0	14.1	 16
477	  8	88.0	18.5	 16
478	  8	65.3	11.4	 16
479	  8	58.3	7.9	 16
480	  8	60.5	12.8	 16
481	  8	72.3	14.8	 16
482	  8	80.5	16.3	 16
483	  8	165.0	29.9	 16
484	  8	210.5	22.0	 16
485	  8	261.3	23.4	 16
486	  8	204.0	28.1	 16
487	  8	224.8	32.8	 16
488	  8	231.5	28.6	 16
489	  8	75.5	16.4	 16
490	  8	124.5	18.2	 16
491	  8	66.3	11.2	 16
492	  8	59.3	17.2	 16
493	  8	207.3	22.8	 16
494	  8	211.3	29.0	 16
495	  8	286.3	31.1	 16
496	  8	68.8	13.4	 16
497	  8	90.8	15.1	 16
498	  8	80.3	21.2	 16
499	  8	145.8	17.0	 16
500	  8	85.3	16.5	 16
501	  8	157.0	37.2	 16
502	  8	264.5	62.3	 16
503	  8	230.8	22.6	 16
504	  8	138.0	15.8	 16
505	  8	123.5	21.0	 16
506	  8	115.3	18.7	 16
507	  8	183.5	27.4	 16
508	  8	88.5	24.7	 16
509	  8	104.3	19.1	 16
510	  8	87.3	13.3	 16
511	  8	102.3	15.4	 16
512	  8	70.3	8.4	 16
513	  8	65.5	12.3	 16
514	  8	66.8	12.8	 16
515	  8	70.3	10.4	 16
516	  8	68.0	12.3	 16
517	  8	178.8	18.7	 16
518	  8	108.3	15.4	 16
519	  8	369.3	33.4	 16
520	  8	224.5	31.8	 16
521	  8	81.5	23.0	 16
522	  8	118.3	20.0	 16
523	  8	98.5	12.3	 16
524	  8	141.8	30.1	 16
525	  8	69.0	15.7	 16
526	  8	54.0	9.3	 16
527	  8	58.0	12.8	 16
528	  8	89.3	12.2	 16
529	  8	109.0	21.9	 16
530	  8	150.3	21.5	 16
531	  8	572.5	96.9	 16
532	  8	231.3	36.7	 16
533	  8	64.0	14.7	 16
534	  8	61.3	13.1	 16
535	  8	87.5	13.4	 20
536	  8	114.5	21.2	 16
537	  8	92.3	15.1	 16
538	  8	365.0	52.1	 16
539	  8	828.0	121.3	 16
540	  8	280.5	53.2	 16
541	  8	84.0	21.0	 16
542	  8	67.0	12.4	 16
543	  8	55.8	9.7	 16
544	  8	92.0	26.7	 16
545	  8	79.3	20.1	 16
546	  8	107.3	27.7	 16
547	  8	62.3	12.7	 16
548	  8	237.3	38.8	 16
549	  8	114.3	18.4	 16
550	  8	80.8	13.9	 16
551	  8	124.5	22.8	 16
552	  8	233.3	26.0	 16
553	  8	137.0	23.3	 16
554	  8	82.5	20.0	 16
555	  8	69.8	13.4	 16
556	  8	69.5	8.6	 16
557	  8	64.0	11.9	 16
558	  8	253.5	42.9	 16
559	  8	452.5	70.6	 16
560	  8	57.8	12.1	 16
561	  8	90.8	14.8	 16
562	  8	175.8	52.3	 16
563	  8	896.8	105.8	 16
564	  8	94.0	12.4	 16
565	  8	94.0	16.2	 16
566	  8	82.0	30.3	 16
567	  8	75.0	13.3	 16
568	  8	160.5	33.8	 16
569	  8	185.0	22.1	 16
570	  8	141.0	41.7	 16
571	  8	79.3	11.0	 16
572	  8	107.3	26.1	 16
573	  8	119.3	25.3	 16
574	  8	116.3	21.9	 16
575	  8	156.0	30.9	 16
576	  8	118.5	22.7	 16
577	  8	114.8	23.7	 16
578	  8	67.0	12.8	 16
579	  8	52.5	12.9	 16
580	  8	94.0	15.2	 16
581	  8	89.8	11.5	 16
582	  8	186.3	25.3	 16
583	  8	66.3	8.9	 16
584	  8	74.5	10.5	 16
585	  8	121.3	16.3	 16
586	  8	66.0	16.9	 16
587	  8	67.3	10.2	 16
588	  8	58.0	10.4	 16
589	  8	152.0	19.4	 16
590	  8	151.0	21.0	 16
591	  8	75.3	14.2	 16
592	  8	600.5	132.3	 16
593	  8	362.8	80.6	 16
594	  8	68.5	14.2	 16
595	  8	70.8	14.6	 16
596	  8	259.5	34.7	 16
597	  8	73.8	10.6	 16
598	  8	240.5	31.1	 16
599	  8	62.0	10.4	 16
600	  8	64.0	10.7	 16
601	  8	74.5	19.4	 16
602	  8	62.5	12.7	 16
603	  8	115.3	18.2	 16
604	  8	327.5	42.3	 16
605	  8	72.3	12.4	 16
606	  8	67.5	16.1	 16
607	  8	103.0	9.9	 16
608	  8	66.3	13.0	 16
609	  8	153.8	30.7	 16
610	  8	90.0	12.8	 16
611	  8	310.5	52.9	 16
612	  8	114.3	19.1	 16
613	  8	66.3	11.3	 16
614	  8	73.5	12.5	 16
615	  8	271.3	30.5	 16
616	  8	104.8	18.3	 16
617	  8	323.8	37.2	 16
618	  8	60.3	11.3	 16
619	  8	157.8	20.9	 16
620	  8	87.3	11.9	 16
621	  8	217.3	27.4	 16
622	  8	95.3	15.4	 16
623	  8	131.8	23.2	 16
624	  8	58.3	9.6	 16
625	  8	219.5	24.2	 16
626	  8	88.3	15.3	 16
627	  8	443.3	32.4	 16
628	  8	223.8	29.1	 16
629	  8	70.3	16.6	 16
630	  8	210.3	36.8	 16
631	  8	471.5	44.8	 16
632	  8	146.0	26.1	 16
633	  8	125.3	17.3	 16
634	  8	169.3	12.9	 16
635	  8	107.5	19.1	 16
636	  8	70.5	9.3	 16
637	  8	124.8	22.9	 16
638	  8	69.8	9.8	 16
639	  8	67.3	11.5	 16
640	  8	51.0	7.0	 16
641	  8	103.0	17.9	 16
642	  8	191.0	22.7	 16
643	  8	74.5	20.1	 16
644	  8	377.8	49.3	 16
645	  8	98.5	14.2	 16
646	  8	269.5	40.9	 16
647	  8	251.0	34.6	 16
648	  8	261.3	16.0	 16
649	  8	398.5	61.1	 16
650	  8	79.3	11.8	 16
651	  8	70.3	10.8	 16
652	  8	96.3	16.8	 16
653	  8	115.3	17.9	 16
654	  8	74.0	14.1	 16
655	  8	83.5	14.3	 16
656	  8	55.5	9.5	 16
657	  8	88.0	24.9	 16
658	  8	79.8	17.9	 16
659	  8	365.5	70.7	 16
660	  8	69.0	12.3	 16
661	  8	107.0	14.4	 16
662	  8	82.0	235.2	 16
663	  8	99.3	19.8	 16
664	  8	173.3	32.2	 16
665	  8	248.3	39.4	 16
666	  8	250.5	27.1	 16
667	  8	384.8	57.1	 16
668	  8	202.5	25.8	 16
669	  8	187.8	26.3	 16
670	  8	418.8	80.3	 16
671	  8	55.3	10.0	 16
672	  8	83.0	15.4	 16
673	  8	92.0	16.0	 16
674	  8	61.3	10.0	 16
675	  8	75.0	9.5	 16
676	  8	214.8	23.4	 16
677	  8	69.5	11.2	 16
678	  8	484.0	90.5	 20
679	  8	132.8	21.8	 16
680	  8	116.8	13.2	 16
681	  8	165.3	21.5	 16
682	  8	154.8	27.2	 16
683	  8	412.3	35.2	 16
684	  8	198.3	26.0	 16
685	  8	213.5	31.3	 16
686	  8	205.5	20.6	 16
687	  8	1294.0	248.9	 16
688	  8	185.5	19.5	 16
689	  8	123.5	30.6	 16
690	  8	245.0	26.5	 16
691	  8	289.3	53.8	 16
692	  8	214.5	28.8	 16
693	  8	126.5	19.9	 16
694	  8	70.8	11.4	 16
695	  8	83.5	16.0	 16
696	  8	79.5	14.6	 16
697	  8	84.3	8.4	 16
698	  8	79.3	14.6	 16
699	  8	99.5	18.5	 16
700	  8	98.0	17.4	 16
701	  8	79.5	13.6	 16
702	  8	100.8	19.7	 16
703	  8	76.3	16.5	 16
704	  8	89.3	14.5	 16
705	  8	98.3	16.2	 16
706	  8	220.8	45.4	 16
707	  8	132.5	18.8	 16
708	  8	99.3	10.7	 16
709	  8	200.8	31.1	 16
710	  8	113.8	17.4	 16
711	  8	6828.3	1227.0	 16
  0	  9	154.8	17.6	 16
  1	  9	354.8	44.0	 16
  2	  9	135.3	22.3	 16
  3	  9	143.0	17.7	 16
  4	  9	147.3	23.3	 16
  5	  9	101.5	13.1	 16
  6	  9	1664.8	132.5	 16
  7	  9	91.8	12.6	 16
  8	  9	135.3	16.2	 16
  9	  9	113.3	18.2	 16
 10	  9	449.3	51.0	 16
 11	  9	90.8	13.2	 16
 12	  9	9329.0	638.3	 16
 13	  9	159.3	22.0	 16
 14	  9	144.0	21.8	 16
 15	  9	154.5	19.1	 16
 16	  9	8942.3	504.7	 16
 17	  9	114.8	16.3	 16
 18	  9	10452.0	202.8	 16
 19	  9	10073.3	1091.2	 16
 20	  9	9562.8	861.8	 16
 21	  9	9378.5	1065.5	 16
 22	  9	155.0	22.3	 16
 23	  9	93.0	14.4	 16
 24	  9	9829.3	757.6	 16
 25	  9	174.5	21.7	 16
 26	  9	135.3	21.3	 16
 27	  9	144.5	22.2	 16
 28	  9	8620.0	582.0	 16
 29	  9	120.5	18.4	 16
 30	  9	10397.0	266.6	 16
 31	  9	9938.8	438.9	 16
 32	  9	9593.3	544.1	 16
 33	  9	9239.3	947.7	 16
 34	  9	141.5	24.0	 16
 35	  9	89.5	12.8	 16
 36	  9	9424.5	851.5	 16
 37	  9	146.0	17.0	 16
 38	  9	126.5	19.3	 16
 39	  9	130.3	16.0	 16
 40	  9	127.3	19.4	 16
 41	  9	95.5	12.0	 16
 42	  9	9648.3	844.8	 16
 43	  9	142.8	14.1	 16
 44	  9	133.5	19.1	 16
 45	  9	140.5	18.6	 16
 46	  9	8371.5	729.5	 16
 47	  9	101.3	20.7	 16
 48	  9	119.8	19.4	 16
 49	  9	117.3	17.9	 16
 50	  9	7318.0	728.5	 16
 51	  9	160.0	22.0	 16
 52	  9	128.5	23.8	 16
 53	  9	82.5	15.1	 16
 54	  9	9452.5	402.6	 16
 55	  9	9528.5	680.1	 16
 56	  9	8899.0	1897.7	 16
 57	  9	138.0	24.9	 16
 58	  9	114.0	17.3	 16
 59	  9	66.3	12.5	 16
 60	  9	69.3	11.8	 16
 61	  9	79.0	20.4	 16
 62	  9	10400.5	805.0	 16
 63	  9	145.5	21.5	 16
 64	  9	126.0	20.4	 16
 65	  9	143.3	17.0	 16
 66	  9	8669.5	546.7	 16
 67	  9	108.3	19.7	 16
 68	  9	9673.5	612.8	 16
 69	  9	157.0	20.7	 16
 70	  9	132.5	13.3	 16
 71	  9	151.0	19.7	 16
 72	  9	8211.3	623.3	 16
 73	  9	101.5	20.5	 16
 74	  9	110.3	15.4	 16
 75	  9	121.5	22.6	 16
 76	  9	138.0	21.4	 16
 77	  9	118.3	19.3	 16
 78	  9	114.5	13.3	 16
 79	  9	83.5	13.6	 16
 80	  9	8962.5	658.6	 16
 81	  9	151.0	20.1	 16
 82	  9	114.3	21.0	 16
 83	  9	129.5	15.0	 16
 84	  9	7888.3	629.3	 16
 85	  9	99.3	22.8	 16
 86	  9	130.8	19.3	 16
 87	  9	118.5	16.0	 16
 88	  9	7981.8	638.7	 16
 89	  9	169.5	26.6	 16
 90	  9	122.5	20.5	 16
 91	  9	81.5	17.4	 16
 92	  9	118.0	19.7	 16
 93	  9	125.8	24.3	 16
 94	  9	124.0	24.7	 16
 95	  9	7986.8	831.3	 16
 96	  9	141.5	19.2	 16
 97	  9	81.5	9.8	 16
 98	  9	116.3	14.3	 16
 99	  9	106.5	14.5	 16
100	  9	120.3	22.6	 16
101	  9	8047.0	703.9	 16
102	  9	148.5	25.6	 16
103	  9	82.3	12.3	 16
104	  9	9058.5	782.7	 16
105	  9	158.3	29.2	 16
106	  9	147.5	22.5	 16
107	  9	115.0	16.4	 16
108	  9	8422.8	782.0	 16
109	  9	94.0	25.2	 16
110	  9	68.3	12.8	 16
111	  9	466.5	56.4	 16
112	  9	2640.5	269.1	 20
113	  9	1450.5	292.3	 16
114	  9	537.0	89.4	 16
115	  9	86.3	14.0	 16
116	  9	83.5	13.8	 16
117	  9	65.3	19.3	 16
118	  9	86.8	15.8	 16
119	  9	122.5	20.0	 16
120	  9	617.8	108.8	 16
121	  9	102.0	17.4	 16
122	  9	132.5	32.2	 16
123	  9	106.0	19.9	 16
124	  9	905.3	174.2	 16
125	  9	74.0	14.7	 16
126	  9	91.3	19.0	 16
127	  9	872.5	211.9	 16
128	  9	62.0	8.8	 16
129	  9	203.5	49.4	 16
130	  9	99.3	22.6	 16
131	  9	165.8	26.3	 16
132	  9	380.5	93.4	 16
133	  9	121.8	22.1	 16
134	  9	1789.8	407.0	 16
135	  9	80.0	12.0	 16
136	  9	101.8	16.8	 16
137	  9	92.5	15.1	 16
138	  9	79.8	14.7	 16
139	  9	91.3	18.5	 16
140	  9	110.5	21.0	 16
141	  9	425.0	93.8	 16
142	  9	144.5	18.2	 16
143	  9	1221.5	233.9	 16
144	  9	140.8	56.0	 16
145	  9	162.3	23.6	 16
146	  9	134.0	34.4	 16
147	  9	90.3	14.8	 16
148	  9	138.8	21.7	 16
149	  9	80.3	11.0	 16
150	  9	651.8	103.0	 16
151	  9	126.8	29.4	 16
152	  9	11257.8	1545.6	 16
153	  9	1280.0	191.9	 16
154	  9	258.0	26.8	 16
155	  9	3458.5	409.4	 16
156	  9	880.5	122.2	 16
157	  9	1576.3	191.4	 16
158	  9	176.5	30.6	 16
159	  9	492.5	59.5	 16
160	  9	1151.3	98.7	 16
161	  9	75.3	11.7	 16
162	  9	84.5	11.0	 16
163	  9	101.0	16.2	 16
164	  9	163.3	19.2	 16
165	  9	449.0	45.4	 16
166	  9	175.0	34.2	 16
167	  9	127.5	15.9	 16
168	  9	185.0	23.9	 16
169	  9	844.8	109.7	 16
170	  9	4031.0	294.6	 16
171	  9	87.5	24.3	 16
172	  9	146.0	20.3	 16
173	  9	149.8	15.2	 16
174	  9	459.0	61.6	 16
175	  9	251.0	44.4	 16
176	  9	77.5	12.0	 16
177	  9	66.5	14.5	 16
178	  9	63.3	9.5	 16
179	  9	142.3	23.6	 16
180	  9	75.0	11.2	 16
181	  9	80.3	13.8	 16
182	  9	76.3	14.3	 16
183	  9	68.3	11.2	 16
184	  9	80.5	14.6	 16
185	  9	84.8	16.2	 16
186	  9	78.8	18.3	 16
187	  9	74.3	11.8	 16
188	  9	65.5	9.7	 16
189	  9	78.5	9.8	 16
190	  9	81.0	12.0	 16
191	  9	1054.5	114.6	 16
192	  9	796.8	74.6	 16
193	  9	157.5	24.1	 16
194	  9	66.0	17.5	 16
195	  9	376.3	57.6	 16
196	  9	92.8	16.2	 16
197	  9	109.3	22.5	 16
198	  9	391.0	54.0	 16
199	  9	162.0	21.5	 16
200	  9	74.0	13.1	 16
201	  9	5054.3	350.9	 16
202	  9	69.3	10.2	 16
203	  9	79.5	14.8	 16
204	  9	96.5	18.1	 16
205	  9	446.8	53.0	 16
206	  9	842.3	51.5	 16
207	  9	199.8	33.6	 16
208	  9	191.3	23.5	 16
209	  9	67.0	13.3	 16
210	  9	277.8	23.7	 16
211	  9	116.3	19.3	 16
212	  9	767.5	62.6	 16
213	  9	589.0	69.7	 16
214	  9	180.3	19.4	 16
215	  9	93.0	15.4	 16
216	  9	156.3	28.9	 16
217	  9	69.5	12.1	 16
218	  9	108.8	19.1	 16
219	  9	58.3	10.7	 16
220	  9	403.5	51.9	 16
221	  9	160.3	20.0	 16
222	  9	198.3	29.3	 16
223	  9	222.8	33.6	 16
224	  9	121.3	14.0	 16
225	  9	176.3	21.6	 16
226	  9	77.8	15.5	 16
227	  9	209.8	40.4	 16
228	  9	75.0	18.8	 16
229	  9	559.5	91.4	 16
230	  9	127.5	19.2	 16
231	  9	2687.8	332.9	 16
232	  9	153.3	19.6	 16
233	  9	1315.0	175.7	 16
234	  9	113.5	24.6	 16
235	  9	872.0	112.1	 16
236	  9	370.3	43.3	 16
237	  9	186.5	19.8	 16
238	  9	951.8	109.9	 16
239	  9	124.3	14.3	 16
240	  9	912.3	114.3	 16
241	  9	171.8	24.3	 16
242	  9	123.8	20.7	 16
243	  9	82.3	15.8	 16
244	  9	131.0	22.3	 16
245	  9	159.8	25.3	 16
246	  9	66.5	13.6	 16
247	  9	7015.8	895.8	 16
248	  9	298.5	46.2	 16
249	  9	425.8	72.7	 16
250	  9	412.8	52.4	 16
251	  9	186.5	24.0	 16
252	  9	955.8	141.8	 16
253	  9	387.5	35.0	 16
254	  9	320.0	35.9	 16
255	  9	62.0	10.8	 20
256	  9	151.3	23.3	 16
257	  9	113.0	19.3	 16
258	  9	1744.5	330.4	 16
259	  9	123.8	16.5	 16
260	  9	135.5	18.2	 16
261	  9	142.0	19.3	 16
262	  9	995.5	207.3	 16
263	  9	80.3	14.9	 16
264	  9	68.3	11.0	 16
265	  9	64.3	11.2	 16
266	  9	578.0	59.7	 16
267	  9	660.3	117.6	 16
268	  9	123.8	21.7	 16
269	  9	882.0	137.7	 16
270	  9	60.5	6.1	 16
271	  9	60.3	9.7	 16
272	  9	76.0	14.5	 16
273	  9	110.3	15.7	 16
274	  9	164.5	28.1	 16
275	  9	177.8	33.2	 16
276	  9	60.0	5.8	 16
277	  9	71.3	11.0	 16
278	  9	113.8	17.9	 16
279	  9	416.0	71.1	 16
280	  9	140.0	18.7	 16
281	  9	105.0	18.5	 16
282	  9	181.5	26.6	 16
283	  9	62.3	11.0	 16
284	  9	156.8	31.9	 16
285	  9	79.3	15.2	 16
286	  9	74.5	14.2	 16
287	  9	63.5	13.9	 16
288	  9	99.3	12.9	 16
289	  9	467.3	52.0	 16
290	  9	314.5	31.0	 16
291	  9	172.5	29.1	 16
292	  9	1177.0	125.0	 16
293	  9	122.0	12.0	 16
294	  9	2051.3	242.3	 16
295	  9	610.3	55.6	 16
296	  9	153.3	27.3	 16
297	  9	495.3	52.1	 16
298	  9	115.3	20.4	 16
299	  9	342.0	35.2	 16
300	  9	396.0	53.4	 16
301	  9	113.8	30.8	 16
302	  9	90.0	14.1	 16
303	  9	78.3	18.5	 16
304	  9	118.5	15.2	 16
305	  9	1010.8	74.8	 16
306	  9	364.5	48.7	 16
307	  9	144.8	19.6	 16
308	  9	702.3	71.4	 16
309	  9	220.3	26.0	 16
310	  9	1024.5	102.7	 16
311	  9	1061.5	118.7	 16
312	  9	113.5	26.8	 16
313	  9	732.5	55.2	 16
314	  9	353.0	44.3	 16
315	  9	152.5	32.3	 16
316	  9	331.8	47.4	 16
317	  9	540.0	45.8	 16
318	  9	119.8	25.9	 16
319	  9	74.0	12.4	 16
320	  9	675.3	79.9	 16
321	  9	307.5	32.3	 16
322	  9	429.0	56.9	 16
323	  9	83.0	17.0	 16
324	  9	70.0	9.5	 16
325	  9	123.5	18.2	 16
326	  9	72.3	10.1	 16
327	  9	76.3	14.0	 16
328	  9	584.0	50.9	 16
329	  9	192.8	31.5	 16
330	  9	163.5	21.4	 16
331	  9	89.3	15.7	 16
332	  9	717.5	68.6	 16
333	  9	651.8	53.4	 16
334	  9	109.5	26.8	 16
335	  9	66.3	11.1	 16
336	  9	92.8	21.9	 16
337	  9	64.5	7.9	 16
338	  9	81.0	15.1	 16
339	  9	265.3	37.5	 16
340	  9	96.3	16.1	 16
341	  9	140.8	21.8	 16
342	  9	248.3	43.1	 16
343	  9	295.5	37.6	 16
344	  9	1820.0	216.2	 16
345	  9	70.0	11.3	 16
346	  9	3289.8	270.4	 16
347	  9	156.0	19.9	 16
348	  9	2305.8	179.3	 16
349	  9	150.3	24.6	 16
350	  9	3004.0	328.6	 16
351	  9	172.5	25.8	 16
352	  9	286.8	33.9	 16
353	  9	363.3	61.3	 16
354	  9	238.3	27.9	 16
355	  9	713.8	50.5	 16
356	  9	1779.5	141.5	 16
357	  9	231.0	28.6	 16
358	  9	338.3	34.4	 16
359	  9	174.5	18.6	 16
360	  9	239.3	33.0	 16
361	  9	378.5	44.2	 16
362	  9	118.0	15.3	 16
363	  9	1064.3	88.9	 16
364	  9	62.5	10.6	 16
365	  9	100.5	13.2	 16
366	  9	56.5	8.7	 16
367	  9	77.3	10.1	 16
368	  9	81.0	16.2	 16
369	  9	190.3	21.0	 16
370	  9	159.8	16.6	 16
371	  9	336.0	24.8	 16
372	  9	259.5	32.0	 16
373	  9	71.5	12.2	 16
374	  9	118.5	23.9	 16
375	  9	128.3	18.0	 16
376	  9	447.5	67.1	 16
377	  9	2705.0	327.3	 16
378	  9	7617.3	908.7	 16
379	  9	196.0	22.9	 16
380	  9	61.0	8.4	 16
381	  9	146.3	28.6	 16
382	  9	305.5	54.6	 16
383	  9	257.8	25.7	 16
384	  9	838.5	91.8	 16
385	  9	1564.0	226.6	 16
386	  9	194.8	33.7	 16
387	  9	814.8	61.7	 16
388	  9	487.0	73.6	 16
389	  9	83.0	10.7	 16
390	  9	76.5	15.2	 16
391	  9	179.5	36.7	 16
392	  9	167.8	22.9	 16
393	  9	81.3	11.5	 16
394	  9	5554.0	898.0	 16
395	  9	169.8	36.0	 16
396	  9	78.3	35.5	 16
397	  9	73.5	13.5	 20
398	  9	111.3	18.7	 16
399	  9	67.8	16.6	 16
400	  9	72.8	13.1	 16
401	  9	75.3	13.3	 16
402	  9	70.3	13.0	 16
403	  9	114.0	19.2	 16
404	  9	86.3	16.0	 16
405	  9	146.0	18.7	 16
406	  9	87.5	22.0	 16
407	  9	245.0	53.7	 16
408	  9	82.0	18.7	 16
409	  9	173.8	55.0	 16
410	  9	103.3	19.6	 16
411	  9	214.3	33.3	 16
412	  9	140.3	24.7	 16
413	  9	181.3	20.2	 16
414	  9	171.3	21.1	 16
415	  9	525.5	74.8	 16
416	  9	92.3	13.7	 16
417	  9	171.0	19.1	 16
418	  9	58.3	9.8	 16
419	  9	673.5	90.4	 16
420	  9	1036.3	130.6	 16
421	  9	111.3	19.3	 16
422	  9	75.0	17.5	 16
423	  9	2095.0	338.0	 16
424	  9	428.0	81.4	 16
425	  9	82.5	12.2	 16
426	  9	67.5	14.0	 16
427	  9	721.5	120.1	 16
428	  9	165.0	23.9	 16
429	  9	61.3	11.9	 16
430	  9	115.3	22.8	 16
431	  9	71.3	14.2	 16
432	  9	75.3	15.4	 16
433	  9	1529.8	289.1	 16
434	  9	77.0	14.2	 16
435	  9	81.8	20.7	 16
436	  9	57.5	10.1	 16
437	  9	87.8	16.2	 16
438	  9	2779.3	399.8	 16
439	  9	131.5	29.9	 16
440	  9	332.0	34.7	 16
441	  9	175.8	27.2	 16
442	  9	3125.3	473.5	 16
443	  9	389.3	24.6	 16
444	  9	1019.5	144.5	 16
445	  9	78.8	11.6	 16
446	  9	308.0	47.6	 16
447	  9	150.5	28.0	 16
448	  9	80.3	14.0	 16
449	  9	63.0	9.4	 16
450	  9	168.5	30.9	 16
451	  9	551.8	59.9	 16
452	  9	62.3	11.3	 16
453	  9	286.5	31.0	 16
454	  9	1555.0	117.8	 16
455	  9	245.0	41.4	 16
456	  9	192.5	43.1	 16
457	  9	57.5	10.8	 16
458	  9	63.3	9.5	 16
459	  9	80.0	9.0	 16
460	  9	563.3	60.2	 16
461	  9	59.8	11.5	 16
462	  9	89.5	16.3	 16
463	  9	449.3	59.5	 16
464	  9	70.3	7.0	 16
465	  9	301.5	39.3	 16
466	  9	331.5	41.3	 16
467	  9	59.3	10.1	 16
468	  9	67.0	12.7	 16
469	  9	275.0	33.5	 16
470	  9	288.8	37.1	 16
471	  9	101.8	12.8	 16
472	  9	205.0	24.7	 16
473	  9	117.0	18.0	 16
474	  9	589.3	87.3	 16
475	  9	87.0	18.8	 16
476	  9	70.3	8.4	 16
477	  9	90.5	14.6	 16
478	  9	347.0	44.4	 16
479	  9	92.3	23.0	 16
480	  9	330.3	27.3	 16
481	  9	110.0	19.1	 16
482	  9	67.5	12.6	 16
483	  9	74.5	17.7	 16
484	  9	708.5	59.4	 16
485	  9	82.5	18.6	 16
486	  9	3086.3	219.7	 16
487	  9	175.5	23.8	 16
488	  9	442.8	62.9	 16
489	  9	61.3	8.0	 16
490	  9	128.3	16.5	 16
491	  9	71.3	16.9	 16
492	  9	441.3	50.0	 16
493	  9	519.3	54.5	 16
494	  9	611.8	51.9	 16
495	  9	322.3	33.3	 16
496	  9	208.3	27.4	 16
497	  9	1076.5	110.9	 16
498	  9	264.0	25.0	 16
499	  9	294.3	27.5	 16
500	  9	122.8	25.3	 16
501	  9	100.8	16.0	 16
502	  9	141.0	25.4	 16
503	  9	131.0	17.8	 16
504	  9	208.5	37.6	 16
505	  9	1485.0	172.1	 16
506	  9	934.3	98.9	 16
507	  9	918.5	99.2	 16
508	  9	2064.3	246.3	 16
509	  9	67.3	8.4	 16
510	  9	963.8	95.7	 16
511	  9	194.8	28.3	 16
512	  9	68.0	8.3	 16
513	  9	243.3	47.4	 16
514	  9	971.8	139.2	 16
515	  9	60.0	7.3	 16
516	  9	293.8	49.6	 16
517	  9	54.0	13.5	 16
518	  9	67.5	12.0	 16
519	  9	401.8	79.0	 16
520	  9	261.0	50.7	 16
521	  9	68.3	11.7	 16
522	  9	72.8	8.5	 16
523	  9	73.0	13.3	 16
524	  9	58.8	10.4	 16
525	  9	101.8	15.9	 16
526	  9	194.0	32.3	 16
527	  9	99.3	17.4	 16
528	  9	82.0	17.9	 16
529	  9	99.5	18.2	 16
530	  9	376.8	63.9	 16
531	  9	94.0	18.5	 16
532	  9	59.3	10.6	 16
533	  9	70.5	15.5	 16
534	  9	70.8	14.6	 16
535	  9	74.5	16.2	 16
536	  9	93.5	19.6	 16
537	  9	221.3	44.8	 16
538	  9	84.3	14.7	 16
539	  9	98.3	18.7	 16
540	  9	765.8	123.4	 20
541	  9	149.8	22.7	 16
542	  9	64.8	13.5	 16
543	  9	137.0	20.7	 16
544	  9	102.3	43.1	 16
545	  9	1074.8	197.7	 16
546	  9	201.5	30.2	 16
547	  9	181.5	24.4	 16
548	  9	213.3	38.3	 16
549	  9	146.3	18.6	 16
550	  9	222.5	33.2	 16
551	  9	302.5	44.1	 16
552	  9	146.8	19.7	 16
553	  9	311.0	32.0	 16
554	  9	136.5	19.2	 16
555	  9	60.5	12.9	 16
556	  9	120.3	26.0	 16
557	  9	103.0	15.8	 16
558	  9	114.8	25.6	 16
559	  9	102.5	11.4	 16
560	  9	82.0	12.9	 16
561	  9	444.0	53.1	 16
562	  9	73.3	11.9	 16
563	  9	139.3	23.9	 16
564	  9	637.3	86.6	 16
565	  9	744.0	108.3	 16
566	  9	2930.5	440.9	 16
567	  9	80.0	17.2	 16
568	  9	60.0	8.9	 16
569	  9	86.3	17.1	 16
570	  9	666.3	74.9	 16
571	  9	1715.3	171.2	 16
572	  9	288.8	36.2	 16
573	  9	122.3	14.5	 16
574	  9	369.3	42.8	 16
575	  9	283.8	42.6	 16
576	  9	184.8	23.9	 16
577	  9	156.8	21.7	 16
578	  9	69.8	15.1	 16
579	  9	67.5	9.9	 16
580	  9	132.8	17.2	 16
581	  9	1065.3	110.3	 16
582	  9	436.8	53.4	 16
583	  9	119.5	13.9	 16
584	  9	117.3	14.7	 16
585	  9	218.3	25.9	 16
586	  9	276.0	38.3	 16
587	  9	59.5	7.4	 16
588	  9	111.3	18.2	 16
589	  9	112.3	16.3	 16
590	  9	342.8	39.6	 16
591	  9	550.0	70.6	 16
592	  9	59.5	12.5	 16
593	  9	134.0	23.0	 16
594	  9	213.0	38.0	 16
595	  9	392.0	32.2	 16
596	  9	2451.8	264.7	 16
597	  9	2650.3	177.9	 16
598	  9	946.3	103.0	 16
599	  9	304.0	36.8	 16
600	  9	343.5	20.4	 16
601	  9	232.3	39.8	 16
602	  9	169.3	33.8	 16
603	  9	876.5	105.4	 16
604	  9	368.5	55.8	 16
605	  9	83.3	17.2	 16
606	  9	581.0	57.9	 16
607	  9	79.5	14.2	 16
608	  9	66.5	11.6	 16
609	  9	149.8	23.7	 16
610	  9	108.8	17.8	 16
611	  9	99.8	15.3	 16
612	  9	245.3	30.5	 16
613	  9	5877.8	517.1	 16
614	  9	98.5	21.2	 16
615	  9	183.5	41.6	 16
616	  9	188.5	32.0	 16
617	  9	974.3	118.3	 16
618	  9	164.5	21.7	 16
619	  9	103.3	13.5	 16
620	  9	295.0	38.8	 16
621	  9	238.3	54.0	 16
622	  9	119.5	16.1	 16
623	  9	434.5	53.2	 16
624	  9	693.5	95.3	 16
625	  9	149.0	21.1	 16
626	  9	70.0	10.1	 16
627	  9	391.0	45.3	 16
628	  9	95.5	11.1	 16
629	  9	82.5	12.7	 16
630	  9	219.3	23.2	 16
631	  9	217.0	29.3	 16
632	  9	2929.8	310.1	 16
633	  9	165.5	22.4	 16
634	  9	2463.0	409.2	 16
635	  9	3705.3	529.2	 16
636	  9	770.0	119.3	 16
637	  9	87.5	9.1	 16
638	  9	72.5	11.7	 16
639	  9	64.3	10.2	 16
640	  9	74.3	17.9	 16
641	  9	1110.8	89.5	 16
642	  9	77.8	12.9	 16
643	  9	76.0	15.2	 16
644	  9	107.3	15.2	 16
645	  9	90.0	14.0	 16
646	  9	494.0	67.0	 16
647	  9	127.0	16.4	 16
648	  9	2493.8	332.9	 16
649	  9	69.8	15.1	 16
650	  9	75.5	12.2	 16
651	  9	67.5	12.0	 16
652	  9	405.5	65.2	 16
653	  9	818.8	122.9	 16
654	  9	339.5	50.9	 16
655	  9	348.5	34.4	 16
656	  9	122.3	30.1	 16
657	  9	447.5	65.7	 16
658	  9	219.0	29.2	 16
659	  9	401.3	77.3	 16
660	  9	124.3	16.4	 16
661	  9	142.0	21.6	 16
662	  9	68.5	9.4	 16
663	  9	564.8	97.9	 16
664	  9	731.8	123.2	 16
665	  9	105.3	22.0	 16
666	  9	225.3	38.5	 16
667	  9	326.8	41.1	 16
668	  9	549.8	61.3	 16
669	  9	231.3	27.6	 16
670	  9	124.3	13.2	 16
671	  9	1159.5	149.9	 16
672	  9	244.3	31.6	 16
673	  9	145.0	27.1	 16
674	  9	246.3	26.6	 16
675	  9	79.0	11.8	 16
676	  9	137.0	20.2	 16
677	  9	315.0	50.7	 16
678	  9	129.3	16.5	 16
679	  9	192.8	39.2	 16
680	  9	732.8	111.8	 16
681	  9	6842.8	1006.8	 16
682	  9	7926.8	512.1	 20
683	  9	8806.3	513.0	 16
684	  9	8690.3	1504.0	 16
685	  9	386.8	30.4	 16
686	  9	421.5	82.0	 16
687	  9	83.3	13.0	 16
688	  9	69.3	14.3	 16
689	  9	87.3	11.8	 16
690	  9	77.3	16.1	 16
691	  9	229.5	40.7	 16
692	  9	73.3	12.6	 16
693	  9	210.8	28.8	 16
694	  9	126.3	19.2	 16
695	  9	90.0	17.3	 16
696	  9	108.8	15.0	 16
697	  9	474.0	41.1	 16
698	  9	1705.0	186.6	 16
699	  9	394.3	36.6	 16
700	  9	385.8	50.9	 16
701	  9	85.0	13.5	 16
702	  9	93.3	17.0	 16
703	  9	65.0	11.1	 16
704	  9	73.0	10.8	 16
705	  9	163.3	18.6	 16
706	  9	225.5	33.1	 16
707	  9	184.5	20.7	 16
708	  9	555.3	37.5	 16
709	  9	366.5	28.7	 16
710	  9	1169.3	94.1	 16
711	  9	123.0	25.6	 16
  0	 10	10170.5	1099.1	 16
  1	 10	116.5	17.4	 16
  2	 10	120.0	19.9	 16
  3	 10	133.8	26.8	 16
  4	 10	109.0	17.3	 16
  5	 10	89.3	9.8	 16
  6	 10	186.8	20.5	 16
  7	 10	99.3	13.7	 16
  8	 10	94.0	13.0	 16
  9	 10	118.3	16.9	 16
 10	 10	175.0	26.0	 16
 11	 10	102.0	24.5	 16
 12	 10	9193.0	1856.3	 16
 13	 10	146.0	22.5	 16
 14	 10	144.3	15.2	 16
 15	 10	165.5	22.8	 16
 16	 10	9311.8	1492.6	 16
 17	 10	97.3	65.6	 16
 18	 10	10065.5	1370.2	 16
 19	 10	156.0	20.7	 16
 20	 10	143.3	14.2	 16
 21	 10	142.8	21.5	 16
 22	 10	137.0	27.9	 16
 23	 10	89.8	13.6	 16
 24	 10	9713.8	846.7	 16
 25	 10	134.3	20.5	 16
 26	 10	124.5	15.6	 16
 27	 10	120.0	22.4	 16
 28	 10	8632.8	661.1	 16
 29	 10	99.8	13.3	 16
 30	 10	10224.3	882.0	 16
 31	 10	151.5	31.6	 16
 32	 10	151.8	22.5	 16
 33	 10	136.5	20.6	 16
 34	 10	119.0	13.7	 16
 35	 10	89.3	13.5	 16
 36	 10	9313.5	1671.9	 16
 37	 10	132.5	22.3	 16
 38	 10	148.8	24.4	 16
 39	 10	145.3	24.1	 16
 40	 10	8286.8	1194.0	 16
 41	 10	98.0	9.8	 16
 42	 10	9618.0	948.7	 16
 43	 10	140.3	16.4	 16
 44	 10	135.5	22.5	 16
 45	 10	134.5	18.8	 16
 46	 10	8415.5	711.6	 16
 47	 10	87.5	9.5	 16
 48	 10	115.3	14.5	 16
 49	 10	107.5	14.8	 16
 50	 10	7766.8	710.8	 16
 51	 10	120.3	22.9	 16
 52	 10	113.0	14.8	 16
 53	 10	69.5	8.1	 16
 54	 10	9237.8	606.0	 16
 55	 10	135.0	26.1	 16
 56	 10	130.3	17.3	 16
 57	 10	106.0	15.8	 16
 58	 10	116.3	15.1	 16
 59	 10	63.0	11.6	 16
 60	 10	65.3	11.1	 16
 61	 10	64.3	8.8	 16
 62	 10	10213.8	723.4	 16
 63	 10	142.0	23.2	 16
 64	 10	118.5	20.0	 16
 65	 10	124.0	15.3	 16
 66	 10	8539.8	648.1	 16
 67	 10	108.0	18.5	 16
 68	 10	9698.8	765.6	 16
 69	 10	135.8	16.9	 16
 70	 10	130.3	16.7	 16
 71	 10	127.8	18.2	 16
 72	 10	8609.3	593.6	 16
 73	 10	93.5	17.0	 16
 74	 10	98.0	19.9	 16
 75	 10	94.3	15.7	 16
 76	 10	90.0	12.7	 16
 77	 10	105.8	15.8	 16
 78	 10	112.3	19.7	 16
 79	 10	65.8	9.0	 16
 80	 10	9016.5	1485.4	 16
 81	 10	126.5	17.4	 16
 82	 10	120.3	25.2	 16
 83	 10	125.8	16.5	 16
 84	 10	8406.3	1056.7	 16
 85	 10	92.0	18.7	 16
 86	 10	110.3	18.9	 16
 87	 10	117.8	13.8	 16
 88	 10	8241.5	570.8	 16
 89	 10	159.5	17.4	 16
 90	 10	138.5	20.5	 16
 91	 10	110.5	42.5	 16
 92	 10	8140.0	671.9	 16
 93	 10	132.0	23.4	 16
 94	 10	115.5	17.8	 16
 95	 10	8253.5	622.1	 16
 96	 10	153.5	22.2	 16
 97	 10	78.3	12.6	 16
 98	 10	8430.5	841.8	 16
 99	 10	135.3	22.5	 16
100	 10	119.8	22.7	 16
101	 10	8303.8	1713.8	 16
102	 10	126.8	26.4	 16
103	 10	71.8	14.5	 16
104	 10	8974.5	702.0	 16
105	 10	131.5	21.9	 16
106	 10	111.3	18.4	 16
107	 10	103.5	18.4	 16
108	 10	8608.8	740.7	 16
109	 10	93.5	28.6	 16
110	 10	61.5	11.1	 16
111	 10	172.0	18.4	 16
112	 10	542.5	44.2	 16
113	 10	440.0	62.8	 16
114	 10	322.0	31.9	 16
115	 10	109.0	15.1	 16
116	 10	78.0	11.3	 16
117	 10	72.3	14.5	 20
118	 10	89.0	17.6	 16
119	 10	95.0	19.4	 16
120	 10	126.0	18.5	 16
121	 10	97.0	22.0	 16
122	 10	83.5	14.2	 16
123	 10	91.8	13.5	 16
124	 10	177.5	34.4	 16
125	 10	74.3	13.9	 16
126	 10	77.0	10.1	 16
127	 10	74.5	10.7	 16
128	 10	69.0	11.9	 16
129	 10	78.0	14.2	 16
130	 10	92.5	17.0	 16
131	 10	133.0	25.0	 16
132	 10	117.8	14.9	 16
133	 10	68.5	13.7	 16
134	 10	107.3	23.0	 16
135	 10	68.5	10.9	 16
136	 10	61.0	10.2	 16
137	 10	73.0	14.8	 16
138	 10	86.0	21.0	 16
139	 10	83.0	16.9	 16
140	 10	79.0	14.3	 16
141	 10	81.8	17.3	 16
142	 10	81.5	16.7	 16
143	 10	414.8	68.7	 16
144	 10	257.0	46.2	 16
145	 10	92.3	12.5	 16
146	 10	75.3	12.2	 16
147	 10	84.3	19.7	 16
148	 10	100.0	22.5	 16
149	 10	83.0	15.1	 16
150	 10	128.0	22.6	 16
151	 10	67.5	13.3	 16
152	 10	2798.5	505.7	 16
153	 10	105.0	19.1	 16
154	 10	333.8	58.1	 16
155	 10	776.8	135.6	 16
156	 10	128.5	21.2	 16
157	 10	556.0	84.2	 16
158	 10	136.5	22.6	 16
159	 10	329.0	44.9	 16
160	 10	1078.5	100.8	 16
161	 10	68.0	11.5	 16
162	 10	62.0	11.8	 16
163	 10	93.3	15.7	 16
164	 10	90.8	15.1	 16
165	 10	194.5	37.4	 16
166	 10	71.0	11.1	 16
167	 10	85.5	15.2	 16
168	 10	106.0	15.3	 16
169	 10	761.0	122.1	 16
170	 10	927.5	167.3	 16
171	 10	77.5	15.2	 16
172	 10	125.3	18.7	 16
173	 10	82.8	21.3	 16
174	 10	105.0	15.7	 16
175	 10	185.0	24.0	 16
176	 10	95.3	16.4	 16
177	 10	79.0	15.9	 16
178	 10	92.5	62.2	 16
179	 10	66.0	9.6	 16
180	 10	61.0	13.0	 16
181	 10	96.8	14.1	 16
182	 10	92.0	18.0	 16
183	 10	85.0	16.7	 16
184	 10	90.8	14.3	 16
185	 10	80.8	12.8	 16
186	 10	83.0	17.4	 16
187	 10	97.0	19.7	 16
188	 10	72.8	11.2	 16
189	 10	79.3	11.8	 16
190	 10	82.0	15.0	 16
191	 10	360.3	34.5	 16
192	 10	248.3	41.0	 16
193	 10	76.8	15.1	 16
194	 10	60.0	11.2	 16
195	 10	83.0	17.0	 16
196	 10	66.8	13.1	 16
197	 10	68.3	10.8	 16
198	 10	94.8	15.1	 16
199	 10	174.5	35.1	 16
200	 10	60.5	16.2	 16
201	 10	1409.8	146.1	 16
202	 10	73.0	14.8	 16
203	 10	68.0	13.7	 16
204	 10	81.5	11.5	 16
205	 10	112.0	21.7	 16
206	 10	301.3	28.7	 16
207	 10	73.5	13.1	 16
208	 10	134.3	22.2	 16
209	 10	55.3	10.9	 16
210	 10	188.8	20.2	 16
211	 10	85.5	18.2	 16
212	 10	391.5	51.6	 16
213	 10	245.5	28.3	 16
214	 10	181.5	23.1	 16
215	 10	104.0	19.2	 16
216	 10	86.3	21.0	 16
217	 10	90.3	12.6	 16
218	 10	81.0	18.4	 16
219	 10	55.5	11.1	 16
220	 10	196.0	32.0	 16
221	 10	193.5	33.0	 16
222	 10	96.0	24.2	 16
223	 10	152.3	25.7	 16
224	 10	193.0	39.8	 16
225	 10	83.0	12.9	 16
226	 10	74.3	14.3	 16
227	 10	75.0	9.7	 16
228	 10	65.0	15.3	 16
229	 10	147.3	26.8	 16
230	 10	86.8	18.6	 16
231	 10	184.3	27.4	 16
232	 10	133.5	22.6	 16
233	 10	211.3	25.5	 16
234	 10	77.3	12.0	 16
235	 10	217.5	51.7	 16
236	 10	109.5	20.0	 16
237	 10	82.3	14.2	 16
238	 10	104.5	16.6	 16
239	 10	158.0	28.4	 16
240	 10	185.3	28.6	 16
241	 10	127.5	21.2	 16
242	 10	71.3	11.4	 16
243	 10	75.5	14.4	 16
244	 10	78.5	11.7	 16
245	 10	203.0	38.8	 16
246	 10	65.5	9.6	 16
247	 10	560.3	65.1	 16
248	 10	100.3	16.1	 16
249	 10	73.5	14.0	 16
250	 10	99.0	21.5	 16
251	 10	159.0	27.8	 16
252	 10	111.0	17.0	 16
253	 10	301.5	36.6	 16
254	 10	97.0	15.7	 16
255	 10	70.0	10.6	 16
256	 10	138.3	21.1	 16
257	 10	95.8	14.7	 16
258	 10	287.0	40.1	 16
259	 10	94.5	20.0	 20
260	 10	136.5	19.0	 16
261	 10	124.0	18.2	 16
262	 10	114.8	21.5	 16
263	 10	55.8	6.6	 16
264	 10	65.3	11.0	 16
265	 10	65.3	9.1	 16
266	 10	209.8	22.3	 16
267	 10	223.3	35.5	 16
268	 10	104.5	14.8	 16
269	 10	338.0	64.5	 16
270	 10	63.8	8.5	 16
271	 10	55.0	9.9	 16
272	 10	58.5	7.7	 16
273	 10	59.0	11.5	 16
274	 10	78.8	16.3	 16
275	 10	71.0	12.9	 16
276	 10	63.5	16.4	 16
277	 10	61.0	10.3	 16
278	 10	91.3	18.0	 16
279	 10	104.5	17.9	 16
280	 10	68.3	12.1	 16
281	 10	76.0	12.1	 16
282	 10	155.5	27.1	 16
283	 10	71.0	14.9	 16
284	 10	69.0	12.1	 16
285	 10	71.0	13.7	 16
286	 10	63.5	11.3	 16
287	 10	68.3	10.9	 16
288	 10	78.0	13.6	 16
289	 10	119.3	27.6	 16
290	 10	134.0	18.5	 16
291	 10	159.0	26.5	 16
292	 10	262.3	27.5	 16
293	 10	127.3	39.2	 16
294	 10	2727.8	277.2	 16
295	 10	773.3	79.7	 16
296	 10	90.3	16.9	 16
297	 10	688.8	81.1	 16
298	 10	175.3	12.8	 16
299	 10	100.0	20.2	 16
300	 10	94.5	15.6	 16
301	 10	98.5	24.7	 16
302	 10	74.8	14.4	 16
303	 10	65.5	10.3	 16
304	 10	146.5	22.9	 16
305	 10	514.5	80.2	 16
306	 10	74.5	22.4	 16
307	 10	106.0	13.7	 16
308	 10	157.5	23.5	 16
309	 10	108.3	19.1	 16
310	 10	277.8	39.2	 16
311	 10	141.8	28.0	 16
312	 10	77.5	16.2	 16
313	 10	106.5	15.3	 16
314	 10	122.3	23.2	 16
315	 10	84.5	12.7	 16
316	 10	214.8	49.8	 16
317	 10	1729.3	162.6	 16
318	 10	65.0	11.0	 16
319	 10	80.5	12.9	 16
320	 10	175.3	26.0	 16
321	 10	113.5	19.7	 16
322	 10	421.5	54.2	 16
323	 10	60.8	11.0	 16
324	 10	157.3	19.4	 16
325	 10	88.0	16.0	 16
326	 10	58.5	10.9	 16
327	 10	69.5	11.4	 16
328	 10	227.5	22.3	 16
329	 10	131.3	17.5	 16
330	 10	93.3	13.6	 16
331	 10	78.0	15.3	 16
332	 10	418.8	58.9	 16
333	 10	372.5	29.4	 16
334	 10	139.3	25.2	 16
335	 10	62.0	8.2	 16
336	 10	63.8	9.5	 16
337	 10	59.8	10.4	 16
338	 10	94.3	28.2	 16
339	 10	173.8	25.2	 16
340	 10	131.8	27.6	 16
341	 10	63.8	11.5	 16
342	 10	176.8	27.6	 16
343	 10	85.5	12.5	 16
344	 10	400.5	43.5	 16
345	 10	60.3	8.6	 16
346	 10	383.3	58.4	 16
347	 10	79.3	11.4	 16
348	 10	1621.3	214.4	 16
349	 10	105.5	16.5	 16
350	 10	464.3	68.9	 16
351	 10	132.5	16.4	 16
352	 10	146.5	13.8	 16
353	 10	120.5	18.0	 16
354	 10	74.8	16.4	 16
355	 10	191.5	15.8	 16
356	 10	235.5	21.6	 16
357	 10	121.3	12.3	 16
358	 10	78.0	12.0	 16
359	 10	141.3	23.1	 16
360	 10	85.0	11.5	 16
361	 10	195.0	27.5	 16
362	 10	66.8	10.0	 16
363	 10	178.8	28.4	 16
364	 10	54.5	7.7	 16
365	 10	60.5	12.6	 16
366	 10	60.5	7.9	 16
367	 10	52.3	7.8	 16
368	 10	62.8	9.7	 16
369	 10	127.5	21.0	 16
370	 10	158.0	27.5	 16
371	 10	113.5	16.3	 16
372	 10	68.0	11.1	 16
373	 10	71.3	13.2	 16
374	 10	68.3	11.0	 16
375	 10	101.8	17.6	 16
376	 10	163.5	45.4	 16
377	 10	682.8	99.2	 16
378	 10	1133.3	161.0	 16
379	 10	111.0	19.8	 16
380	 10	57.3	10.1	 16
381	 10	58.0	10.0	 16
382	 10	82.3	16.1	 16
383	 10	225.3	36.3	 16
384	 10	204.3	25.2	 16
385	 10	248.5	39.8	 16
386	 10	281.0	35.2	 16
387	 10	212.8	33.5	 16
388	 10	86.0	15.9	 16
389	 10	84.0	16.7	 16
390	 10	92.5	17.1	 16
391	 10	111.3	22.2	 16
392	 10	99.0	22.9	 16
393	 10	69.3	11.7	 16
394	 10	1231.5	279.0	 16
395	 10	260.0	36.9	 16
396	 10	68.3	11.8	 16
397	 10	74.0	14.1	 16
398	 10	117.8	23.7	 16
399	 10	83.5	12.2	 16
400	 10	57.5	9.7	 16
401	 10	101.0	17.4	 16
402	 10	79.0	16.0	 20
403	 10	71.3	12.5	 16
404	 10	100.3	13.9	 16
405	 10	113.3	17.9	 16
406	 10	67.0	13.7	 16
407	 10	82.3	14.9	 16
408	 10	76.8	8.4	 16
409	 10	118.5	23.5	 16
410	 10	57.8	10.3	 16
411	 10	432.3	56.1	 16
412	 10	88.0	15.5	 16
413	 10	105.0	16.3	 16
414	 10	167.3	28.3	 16
415	 10	70.0	10.0	 16
416	 10	131.5	29.7	 16
417	 10	80.8	15.8	 16
418	 10	63.8	8.7	 16
419	 10	126.0	17.1	 16
420	 10	265.0	54.5	 16
421	 10	76.3	13.7	 16
422	 10	61.8	13.3	 16
423	 10	203.8	38.8	 16
424	 10	89.8	16.7	 16
425	 10	70.5	14.5	 16
426	 10	64.5	14.1	 16
427	 10	90.5	14.6	 16
428	 10	81.3	11.1	 16
429	 10	70.3	13.5	 16
430	 10	61.3	11.0	 16
431	 10	64.0	11.4	 16
432	 10	62.0	16.1	 16
433	 10	97.5	16.1	 16
434	 10	74.3	13.6	 16
435	 10	61.3	10.9	 16
436	 10	57.3	9.3	 16
437	 10	76.5	12.7	 16
438	 10	1196.8	298.4	 16
439	 10	104.3	17.4	 16
440	 10	139.3	19.3	 16
441	 10	99.3	13.2	 16
442	 10	635.5	127.0	 16
443	 10	199.0	27.7	 16
444	 10	76.0	12.4	 16
445	 10	82.0	15.7	 16
446	 10	74.3	12.0	 16
447	 10	70.5	12.0	 16
448	 10	65.0	11.9	 16
449	 10	65.5	11.9	 16
450	 10	104.3	16.8	 16
451	 10	121.8	23.2	 16
452	 10	149.0	22.1	 16
453	 10	168.0	25.1	 16
454	 10	868.8	94.4	 16
455	 10	137.0	20.5	 16
456	 10	97.3	12.7	 16
457	 10	54.3	9.8	 16
458	 10	72.0	12.6	 16
459	 10	53.0	13.4	 16
460	 10	417.0	75.3	 16
461	 10	61.3	11.9	 16
462	 10	73.3	14.0	 16
463	 10	103.3	21.7	 16
464	 10	59.3	11.7	 16
465	 10	76.5	11.6	 16
466	 10	409.0	36.8	 16
467	 10	69.8	10.6	 16
468	 10	54.3	11.1	 16
469	 10	66.0	15.4	 16
470	 10	68.8	15.9	 16
471	 10	66.8	14.3	 16
472	 10	153.5	21.9	 16
473	 10	93.3	16.5	 16
474	 10	125.8	27.6	 16
475	 10	83.0	15.6	 16
476	 10	60.5	8.7	 16
477	 10	74.3	10.7	 16
478	 10	92.5	17.2	 16
479	 10	60.3	9.2	 16
480	 10	90.0	14.7	 16
481	 10	57.8	7.9	 16
482	 10	74.0	20.8	 16
483	 10	60.5	12.4	 16
484	 10	212.3	38.6	 16
485	 10	86.8	17.7	 16
486	 10	328.3	37.5	 16
487	 10	71.5	12.2	 16
488	 10	89.3	13.0	 16
489	 10	60.0	10.6	 16
490	 10	74.5	9.9	 16
491	 10	80.0	19.6	 16
492	 10	92.0	14.3	 16
493	 10	341.8	36.5	 16
494	 10	727.3	33.0	 16
495	 10	333.8	33.2	 16
496	 10	361.5	38.5	 16
497	 10	900.0	66.7	 16
498	 10	321.3	34.0	 16
499	 10	296.5	33.3	 16
500	 10	64.5	10.3	 16
501	 10	71.8	14.1	 16
502	 10	64.5	12.3	 16
503	 10	126.0	23.4	 16
504	 10	110.3	16.7	 16
505	 10	107.0	16.1	 16
506	 10	1304.8	193.5	 16
507	 10	91.0	15.7	 16
508	 10	500.5	80.9	 16
509	 10	68.0	10.8	 16
510	 10	171.3	21.2	 16
511	 10	91.3	15.9	 16
512	 10	64.3	9.0	 16
513	 10	61.0	12.0	 16
514	 10	139.3	24.3	 16
515	 10	60.5	10.2	 16
516	 10	61.0	11.2	 16
517	 10	63.5	12.3	 16
518	 10	63.3	10.3	 16
519	 10	91.0	13.4	 16
520	 10	94.8	15.6	 16
521	 10	63.8	10.7	 16
522	 10	120.8	24.1	 16
523	 10	56.5	8.4	 16
524	 10	63.8	9.6	 16
525	 10	102.0	21.1	 16
526	 10	85.3	16.3	 16
527	 10	81.5	14.2	 16
528	 10	71.5	11.0	 16
529	 10	73.3	14.2	 16
530	 10	192.0	24.8	 16
531	 10	69.0	8.8	 16
532	 10	74.8	19.5	 16
533	 10	78.3	13.9	 16
534	 10	56.5	12.4	 16
535	 10	96.8	18.7	 16
536	 10	75.0	16.8	 16
537	 10	89.3	16.5	 16
538	 10	70.3	10.5	 16
539	 10	65.8	12.8	 16
540	 10	134.3	23.8	 16
541	 10	77.8	12.5	 16
542	 10	58.5	11.7	 16
543	 10	79.8	25.4	 16
544	 10	77.3	26.4	 20
545	 10	105.5	20.9	 16
546	 10	224.0	31.0	 16
547	 10	358.0	67.5	 16
548	 10	80.3	13.0	 16
549	 10	119.0	22.2	 16
550	 10	139.0	39.4	 16
551	 10	444.8	59.7	 16
552	 10	226.5	31.3	 16
553	 10	184.3	38.6	 16
554	 10	90.3	23.3	 16
555	 10	65.5	13.3	 16
556	 10	63.5	10.2	 16
557	 10	83.0	10.5	 16
558	 10	63.5	9.5	 16
559	 10	73.0	12.2	 16
560	 10	58.5	10.0	 16
561	 10	210.5	27.6	 16
562	 10	59.5	10.8	 16
563	 10	88.3	12.2	 16
564	 10	149.3	20.4	 16
565	 10	241.5	34.3	 16
566	 10	723.0	102.5	 16
567	 10	64.3	8.9	 16
568	 10	70.3	10.8	 16
569	 10	173.3	21.7	 16
570	 10	301.8	56.7	 16
571	 10	591.0	95.7	 16
572	 10	337.0	35.0	 16
573	 10	92.3	20.8	 16
574	 10	218.3	31.3	 16
575	 10	200.5	31.6	 16
576	 10	180.5	50.3	 16
577	 10	94.8	13.1	 16
578	 10	63.0	12.9	 16
579	 10	49.3	9.1	 16
580	 10	121.5	21.7	 16
581	 10	137.3	20.2	 16
582	 10	177.0	23.7	 16
583	 10	73.5	15.8	 16
584	 10	67.0	10.7	 16
585	 10	136.3	22.8	 16
586	 10	84.0	12.4	 16
587	 10	56.5	9.1	 16
588	 10	94.8	13.5	 16
589	 10	96.8	14.3	 16
590	 10	121.3	24.1	 16
591	 10	106.3	19.3	 16
592	 10	57.5	9.3	 16
593	 10	93.0	12.1	 16
594	 10	110.8	16.4	 16
595	 10	165.3	28.8	 16
596	 10	228.3	32.4	 16
597	 10	232.3	24.4	 16
598	 10	176.0	27.3	 16
599	 10	212.5	29.2	 16
600	 10	261.8	26.5	 16
601	 10	142.3	19.2	 16
602	 10	91.5	12.7	 16
603	 10	96.3	19.6	 16
604	 10	64.0	11.3	 16
605	 10	75.0	11.1	 16
606	 10	300.5	33.4	 16
607	 10	73.5	15.2	 16
608	 10	63.5	10.3	 16
609	 10	64.5	13.9	 16
610	 10	211.8	24.9	 16
611	 10	163.0	17.0	 16
612	 10	85.8	13.8	 16
613	 10	833.5	138.6	 16
614	 10	80.0	15.6	 16
615	 10	81.0	17.3	 16
616	 10	104.3	14.6	 16
617	 10	232.8	26.3	 16
618	 10	157.0	31.3	 16
619	 10	69.3	10.4	 16
620	 10	117.8	13.3	 16
621	 10	144.3	30.8	 16
622	 10	86.0	14.8	 16
623	 10	99.3	9.2	 16
624	 10	77.3	10.7	 16
625	 10	69.3	11.6	 16
626	 10	66.0	13.6	 16
627	 10	81.5	15.5	 16
628	 10	175.8	27.5	 16
629	 10	81.5	14.9	 16
630	 10	157.3	25.3	 16
631	 10	413.5	57.9	 16
632	 10	311.3	41.0	 16
633	 10	96.3	15.3	 16
634	 10	918.5	145.4	 16
635	 10	433.0	93.8	 16
636	 10	149.5	23.4	 16
637	 10	68.8	9.1	 16
638	 10	62.8	9.3	 16
639	 10	57.5	11.2	 16
640	 10	71.0	15.3	 16
641	 10	733.8	79.8	 16
642	 10	62.5	12.5	 16
643	 10	62.0	12.4	 16
644	 10	163.3	23.2	 16
645	 10	63.0	12.0	 16
646	 10	107.5	20.5	 16
647	 10	143.5	21.2	 16
648	 10	417.0	59.1	 16
649	 10	62.0	9.1	 16
650	 10	60.3	8.7	 16
651	 10	64.3	13.8	 16
652	 10	78.3	13.1	 16
653	 10	271.5	37.0	 16
654	 10	137.3	25.5	 16
655	 10	115.3	13.4	 16
656	 10	95.5	26.6	 16
657	 10	69.3	10.6	 16
658	 10	758.0	106.4	 16
659	 10	81.0	18.5	 16
660	 10	85.3	17.8	 16
661	 10	63.3	11.7	 16
662	 10	62.3	10.5	 16
663	 10	262.8	36.4	 16
664	 10	106.0	9.7	 16
665	 10	112.0	20.0	 16
666	 10	86.3	14.5	 16
667	 10	372.0	45.5	 16
668	 10	189.3	20.5	 16
669	 10	209.5	36.3	 16
670	 10	217.0	35.8	 16
671	 10	164.3	21.0	 16
672	 10	180.8	22.9	 16
673	 10	122.5	19.4	 16
674	 10	102.3	18.7	 16
675	 10	93.3	18.4	 16
676	 10	137.8	18.8	 16
677	 10	168.5	22.9	 16
678	 10	75.0	13.9	 16
679	 10	78.8	16.7	 16
680	 10	503.8	94.3	 16
681	 10	1371.5	313.8	 16
682	 10	1640.3	243.1	 16
683	 10	2063.3	295.0	 16
684	 10	2091.8	276.7	 16
685	 10	161.8	12.1	 16
686	 10	108.0	18.9	 20
687	 10	96.0	11.7	 16
688	 10	71.3	14.9	 16
689	 10	62.0	15.4	 16
690	 10	73.5	10.3	 16
691	 10	229.5	26.9	 16
692	 10	80.3	14.9	 16
693	 10	84.8	12.1	 16
694	 10	83.0	7.7	 16
695	 10	65.3	11.2	 16
696	 10	67.0	8.6	 16
697	 10	142.8	26.8	 16
698	 10	372.3	76.7	 16
699	 10	175.3	17.6	 16
700	 10	112.0	22.9	 16
701	 10	92.3	16.6	 16
702	 10	83.8	20.8	 16
703	 10	74.0	18.6	 16
704	 10	65.3	13.7	 16
705	 10	106.0	13.8	 16
706	 10	98.8	13.8	 16
707	 10	148.5	18.7	 16
708	 10	464.3	86.7	 16
709	 10	398.5	35.2	 16
710	 10	209.5	18.8	 16
711	 10	6419.5	621.8	 16
  0	 11	153.8	28.3	 16
  1	 11	125.5	16.4	 16
  2	 11	104.3	18.4	 16
  3	 11	124.5	17.3	 16
  4	 11	97.3	12.5	 16
  5	 11	1049.8	115.9	 16
  6	 11	111.0	15.7	 16
  7	 11	538.3	54.7	 16
  8	 11	176.5	30.2	 16
  9	 11	99.8	21.2	 16
 10	 11	154.8	16.7	 16
 11	 11	76.0	11.1	 12
 12	 11	131.8	23.4	 16
 13	 11	9598.0	1934.6	 16
 14	 11	9390.8	1649.2	 16
 15	 11	9288.3	1784.1	 16
 16	 11	146.8	23.5	 16
 17	 11	81.5	13.1	 16
 18	 11	116.0	21.7	 16
 19	 11	9908.0	1381.5	 16
 20	 11	9725.3	1115.3	 16
 21	 11	9339.8	1285.3	 16
 22	 11	119.5	10.9	 16
 23	 11	70.8	12.0	 16
 24	 11	9592.3	1188.7	 16
 25	 11	121.5	20.5	 16
 26	 11	110.3	20.2	 16
 27	 11	109.3	17.8	 16
 28	 11	8519.5	831.7	 16
 29	 11	82.3	15.5	 16
 30	 11	138.8	26.0	 16
 31	 11	9770.3	647.0	 16
 32	 11	9677.0	715.7	 16
 33	 11	9246.5	1208.5	 16
 34	 11	120.3	25.0	 16
 35	 11	67.3	10.7	 16
 36	 11	130.5	31.1	 16
 37	 11	9082.5	1313.6	 16
 38	 11	9084.5	1146.4	 16
 39	 11	8875.5	1328.7	 16
 40	 11	133.0	23.7	 16
 41	 11	75.8	13.8	 16
 42	 11	9553.3	1300.6	 16
 43	 11	123.0	20.3	 16
 44	 11	128.5	24.3	 16
 45	 11	119.8	18.7	 16
 46	 11	8401.5	851.8	 16
 47	 11	71.0	14.9	 16
 48	 11	113.3	17.8	 16
 49	 11	111.3	19.1	 16
 50	 11	8345.0	797.5	 16
 51	 11	117.0	21.1	 16
 52	 11	107.5	17.2	 16
 53	 11	67.3	11.6	 16
 54	 11	8822.5	726.2	 16
 55	 11	101.8	22.4	 16
 56	 11	84.3	14.0	 16
 57	 11	93.0	17.5	 16
 58	 11	104.0	20.2	 16
 59	 11	64.0	13.8	 16
 60	 11	52.3	7.7	 16
 61	 11	58.3	10.4	 16
 62	 11	9499.5	1067.1	 16
 63	 11	123.0	20.6	 16
 64	 11	108.0	14.1	 16
 65	 11	119.3	13.4	 16
 66	 11	8287.5	590.5	 16
 67	 11	87.0	15.6	 16
 68	 11	111.5	24.0	 16
 69	 11	9099.3	532.9	 16
 70	 11	8959.5	366.9	 16
 71	 11	8480.0	583.2	 16
 72	 11	140.8	28.8	 16
 73	 11	56.0	9.5	 16
 74	 11	90.3	15.8	 16
 75	 11	87.8	14.9	 16
 76	 11	80.0	15.6	 16
 77	 11	93.3	15.3	 16
 78	 11	99.5	14.8	 16
 79	 11	62.0	9.5	 16
 80	 11	99.8	17.2	 16
 81	 11	8808.8	1082.4	 16
 82	 11	9037.3	815.4	 16
 83	 11	8574.0	834.6	 16
 84	 11	131.0	24.3	 16
 85	 11	61.3	10.3	 16
 86	 11	108.5	19.3	 16
 87	 11	8626.3	776.7	 16
 88	 11	8793.8	429.4	 16
 89	 11	8481.0	382.2	 16
 90	 11	136.0	30.9	 16
 91	 11	84.0	19.4	 16
 92	 11	130.3	24.0	 16
 93	 11	8807.8	666.5	 16
 94	 11	8680.0	498.6	 16
 95	 11	126.5	22.3	 16
 96	 11	117.3	17.3	 16
 97	 11	64.5	11.3	 16
 98	 11	120.5	18.1	 16
 99	 11	8891.5	820.6	 16
100	 11	8834.3	1828.0	 16
101	 11	119.0	22.4	 16
102	 11	106.0	21.8	 16
103	 11	55.8	8.3	 16
104	 11	8928.8	1510.2	 16
105	 11	114.8	27.5	 16
106	 11	104.3	17.7	 16
107	 11	106.3	20.3	 16
108	 11	8221.8	1068.6	 16
109	 11	74.0	23.9	 16
110	 11	58.0	16.7	 16
111	 11	87.8	16.6	 16
112	 11	2790.5	248.2	 16
113	 11	112.5	13.4	 16
114	 11	182.3	29.2	 16
115	 11	196.0	21.9	 16
116	 11	147.3	19.0	 16
117	 11	107.8	21.8	 16
118	 11	66.0	14.1	 16
119	 11	159.0	35.2	 16
120	 11	283.8	43.6	 16
121	 11	404.0	98.5	 20
122	 11	846.8	201.3	 16
123	 11	1396.8	323.8	 16
124	 11	227.8	33.1	 16
125	 11	103.0	20.7	 16
126	 11	92.3	14.5	 16
127	 11	407.0	77.8	 16
128	 11	71.0	13.8	 16
129	 11	163.5	25.1	 16
130	 11	5212.3	1227.0	 16
131	 11	126.0	22.3	 16
132	 11	121.5	22.7	 16
133	 11	109.8	14.6	 16
134	 11	279.5	49.4	 16
135	 11	147.5	22.9	 16
136	 11	67.5	17.5	 16
137	 11	76.3	16.9	 16
138	 11	70.5	13.9	 16
139	 11	196.3	37.2	 16
140	 11	87.0	13.5	 16
141	 11	95.8	13.4	 16
142	 11	1760.5	379.9	 16
143	 11	1500.3	306.2	 16
144	 11	80.3	18.8	 16
145	 11	73.8	14.8	 16
146	 11	805.8	155.9	 16
147	 11	67.5	13.1	 16
148	 11	95.5	13.7	 16
149	 11	249.0	40.4	 16
150	 11	131.8	21.4	 16
151	 11	136.5	18.1	 16
152	 11	288.5	37.3	 16
153	 11	3493.0	521.6	 16
154	 11	6442.3	689.5	 16
155	 11	1278.8	239.6	 16
156	 11	78.8	17.4	 16
157	 11	544.5	56.5	 16
158	 11	792.0	87.8	 16
159	 11	288.8	59.3	 16
160	 11	71.5	9.8	 16
161	 11	1132.0	121.6	 16
162	 11	84.3	19.2	 16
163	 11	60.0	8.4	 16
164	 11	66.0	15.6	 16
165	 11	72.5	13.7	 16
166	 11	1367.8	247.7	 16
167	 11	81.0	13.6	 16
168	 11	88.3	19.9	 16
169	 11	55.5	8.9	 16
170	 11	872.8	109.6	 16
171	 11	124.8	23.2	 16
172	 11	94.8	11.2	 16
173	 11	122.0	15.5	 16
174	 11	234.3	18.2	 16
175	 11	332.3	37.5	 16
176	 11	144.0	30.9	 16
177	 11	128.5	23.2	 16
178	 11	340.5	38.0	 16
179	 11	147.0	17.5	 16
180	 11	73.5	14.2	 16
181	 11	1059.0	105.6	 16
182	 11	515.8	55.9	 16
183	 11	76.0	15.0	 16
184	 11	85.5	13.6	 16
185	 11	72.5	12.9	 16
186	 11	72.8	13.7	 16
187	 11	597.0	62.7	 16
188	 11	558.0	65.6	 16
189	 11	411.8	36.2	 16
190	 11	154.8	26.7	 16
191	 11	110.8	18.1	 16
192	 11	152.5	26.1	 16
193	 11	54.8	8.9	 16
194	 11	203.3	34.2	 16
195	 11	80.5	12.0	 16
196	 11	458.8	42.5	 16
197	 11	151.0	16.8	 16
198	 11	643.3	92.5	 16
199	 11	308.3	30.9	 16
200	 11	92.3	18.8	 16
201	 11	85.8	15.9	 16
202	 11	2214.5	180.3	 16
203	 11	111.5	16.7	 16
204	 11	63.8	11.8	 16
205	 11	71.5	11.7	 16
206	 11	86.0	16.6	 16
207	 11	65.3	11.6	 16
208	 11	242.5	38.1	 16
209	 11	512.5	46.9	 16
210	 11	310.5	48.6	 16
211	 11	68.0	14.7	 16
212	 11	89.3	12.4	 16
213	 11	192.3	25.8	 16
214	 11	210.3	35.4	 16
215	 11	811.0	53.5	 16
216	 11	372.0	42.5	 16
217	 11	91.0	16.4	 16
218	 11	200.3	40.1	 16
219	 11	171.0	28.1	 16
220	 11	74.3	13.6	 16
221	 11	431.8	38.4	 16
222	 11	2599.0	274.9	 16
223	 11	133.5	25.9	 16
224	 11	78.3	13.9	 16
225	 11	839.5	76.8	 16
226	 11	337.8	48.2	 16
227	 11	67.3	9.6	 16
228	 11	97.3	24.2	 16
229	 11	149.3	23.8	 16
230	 11	251.5	40.1	 16
231	 11	377.3	40.1	 16
232	 11	215.8	30.8	 16
233	 11	136.5	27.2	 16
234	 11	97.0	17.0	 16
235	 11	191.8	36.3	 16
236	 11	302.8	40.9	 16
237	 11	122.3	15.4	 16
238	 11	133.3	16.6	 16
239	 11	238.3	27.9	 16
240	 11	1993.0	200.4	 16
241	 11	186.5	28.7	 16
242	 11	1256.3	176.6	 16
243	 11	58.0	10.7	 16
244	 11	68.8	15.9	 16
245	 11	277.0	33.1	 16
246	 11	95.8	22.2	 16
247	 11	77.8	13.4	 16
248	 11	1464.3	139.8	 16
249	 11	248.0	29.3	 16
250	 11	835.8	93.3	 16
251	 11	80.5	13.6	 16
252	 11	74.8	13.0	 16
253	 11	110.8	15.1	 16
254	 11	101.0	18.6	 16
255	 11	80.8	15.8	 16
256	 11	59.8	10.3	 16
257	 11	69.0	15.3	 16
258	 11	202.3	35.5	 16
259	 11	123.5	16.8	 16
260	 11	79.3	14.4	 16
261	 11	60.5	10.5	 16
262	 11	67.5	12.2	 16
263	 11	389.8	42.0	 16
264	 11	75.0	11.9	 20
265	 11	95.0	14.8	 16
266	 11	308.3	40.1	 16
267	 11	192.3	20.1	 16
268	 11	219.0	42.6	 16
269	 11	287.8	54.7	 16
270	 11	184.3	26.3	 16
271	 11	299.3	46.9	 16
272	 11	69.8	14.6	 16
273	 11	109.5	20.1	 16
274	 11	221.5	41.4	 16
275	 11	124.8	20.9	 16
276	 11	125.3	19.6	 16
277	 11	332.3	57.2	 16
278	 11	1211.3	181.7	 16
279	 11	647.0	104.8	 16
280	 11	148.5	24.1	 16
281	 11	100.3	18.5	 16
282	 11	274.3	48.1	 16
283	 11	200.0	35.6	 16
284	 11	61.8	10.1	 16
285	 11	134.3	25.7	 16
286	 11	618.5	88.9	 16
287	 11	847.8	124.3	 16
288	 11	3176.8	501.6	 16
289	 11	696.0	80.3	 16
290	 11	76.5	15.0	 16
291	 11	89.8	14.2	 16
292	 11	286.3	37.9	 16
293	 11	1056.3	115.1	 16
294	 11	102.5	19.3	 16
295	 11	589.5	65.7	 16
296	 11	686.3	59.8	 16
297	 11	2647.0	360.5	 16
298	 11	71.3	12.4	 16
299	 11	385.5	43.3	 16
300	 11	247.5	37.5	 16
301	 11	73.0	8.9	 16
302	 11	102.8	19.5	 16
303	 11	242.5	35.9	 16
304	 11	177.5	29.3	 16
305	 11	600.0	52.0	 16
306	 11	130.3	23.3	 16
307	 11	130.0	18.8	 16
308	 11	260.0	27.6	 16
309	 11	525.5	64.2	 16
310	 11	98.0	17.4	 16
311	 11	138.0	29.2	 16
312	 11	108.8	21.8	 16
313	 11	262.0	29.0	 16
314	 11	680.0	78.3	 16
315	 11	86.0	20.3	 16
316	 11	57.0	9.3	 16
317	 11	117.8	19.1	 16
318	 11	90.3	17.0	 16
319	 11	67.3	11.5	 16
320	 11	455.8	42.2	 16
321	 11	102.0	18.9	 16
322	 11	66.0	8.6	 16
323	 11	1602.8	143.5	 16
324	 11	304.5	40.6	 16
325	 11	326.3	33.4	 16
326	 11	557.5	70.0	 16
327	 11	112.5	16.6	 16
328	 11	88.8	16.6	 16
329	 11	105.8	18.0	 16
330	 11	1103.0	117.6	 16
331	 11	97.8	22.6	 16
332	 11	66.0	12.3	 16
333	 11	102.0	13.1	 16
334	 11	75.0	11.2	 16
335	 11	298.0	34.9	 16
336	 11	59.0	11.0	 16
337	 11	165.3	47.5	 16
338	 11	62.5	10.5	 16
339	 11	228.3	45.7	 16
340	 11	312.3	47.5	 16
341	 11	437.3	50.0	 16
342	 11	307.0	29.4	 16
343	 11	78.8	13.2	 16
344	 11	306.8	30.8	 16
345	 11	80.5	10.8	 16
346	 11	76.0	18.4	 16
347	 11	59.0	10.7	 16
348	 11	60.5	7.8	 16
349	 11	66.0	10.5	 16
350	 11	626.0	55.4	 16
351	 11	76.0	14.3	 16
352	 11	81.8	13.0	 16
353	 11	89.0	17.8	 16
354	 11	196.0	25.9	 16
355	 11	859.5	105.9	 16
356	 11	991.8	81.0	 16
357	 11	434.3	48.9	 16
358	 11	785.5	102.5	 16
359	 11	67.3	11.0	 16
360	 11	100.5	17.4	 16
361	 11	276.3	32.9	 16
362	 11	77.0	18.1	 16
363	 11	100.0	18.0	 16
364	 11	195.5	14.4	 16
365	 11	122.0	75.7	 16
366	 11	56.8	9.4	 16
367	 11	118.0	17.8	 16
368	 11	230.0	28.4	 16
369	 11	89.8	17.5	 16
370	 11	266.0	50.5	 16
371	 11	393.0	39.3	 16
372	 11	120.5	21.9	 16
373	 11	337.8	49.2	 16
374	 11	300.8	33.2	 16
375	 11	369.5	30.4	 16
376	 11	104.5	22.3	 16
377	 11	89.0	18.2	 16
378	 11	598.0	70.5	 16
379	 11	88.5	16.7	 16
380	 11	108.3	23.0	 16
381	 11	148.8	32.7	 16
382	 11	80.3	11.2	 16
383	 11	349.8	61.3	 16
384	 11	75.3	12.3	 16
385	 11	212.3	30.8	 16
386	 11	156.3	15.7	 16
387	 11	240.5	30.9	 16
388	 11	68.0	10.2	 16
389	 11	62.3	7.6	 16
390	 11	132.8	25.1	 16
391	 11	157.5	22.5	 16
392	 11	86.8	29.7	 16
393	 11	444.3	64.9	 16
394	 11	85.0	13.4	 16
395	 11	186.5	33.0	 16
396	 11	294.0	44.7	 16
397	 11	1174.5	100.8	 16
398	 11	330.5	58.0	 16
399	 11	545.3	92.5	 16
400	 11	147.3	33.5	 16
401	 11	386.5	58.6	 16
402	 11	86.5	17.1	 16
403	 11	212.5	28.4	 16
404	 11	72.8	11.8	 16
405	 11	98.8	22.9	 16
406	 11	404.3	84.2	 20
407	 11	59.8	13.4	 16
408	 11	65.3	10.8	 16
409	 11	84.3	14.1	 16
410	 11	121.5	15.1	 16
411	 11	88.5	19.1	 16
412	 11	141.0	25.0	 16
413	 11	98.8	16.1	 16
414	 11	92.0	32.7	 16
415	 11	1255.3	218.8	 16
416	 11	256.0	34.1	 16
417	 11	363.8	52.4	 16
418	 11	334.5	37.4	 16
419	 11	105.5	18.3	 16
420	 11	58.5	9.4	 16
421	 11	90.0	14.8	 16
422	 11	85.3	13.4	 16
423	 11	335.3	49.4	 16
424	 11	250.0	24.1	 16
425	 11	1483.5	248.2	 16
426	 11	151.8	30.4	 16
427	 11	90.8	17.0	 16
428	 11	264.0	33.8	 16
429	 11	108.3	15.7	 16
430	 11	354.5	57.0	 16
431	 11	62.3	6.7	 16
432	 11	203.8	38.0	 16
433	 11	90.0	14.6	 16
434	 11	66.0	10.1	 16
435	 11	141.3	26.9	 16
436	 11	247.0	45.0	 16
437	 11	412.0	50.4	 16
438	 11	3714.3	473.4	 16
439	 11	206.3	31.5	 16
440	 11	70.0	13.6	 16
441	 11	172.8	42.1	 16
442	 11	160.0	26.6	 16
443	 11	488.0	74.3	 16
444	 11	79.8	14.2	 16
445	 11	285.8	45.1	 16
446	 11	125.5	15.3	 16
447	 11	270.0	51.0	 16
448	 11	79.3	12.0	 16
449	 11	66.0	11.0	 16
450	 11	269.5	32.4	 16
451	 11	206.5	40.3	 16
452	 11	206.8	31.4	 16
453	 11	62.5	11.6	 16
454	 11	82.8	10.4	 16
455	 11	580.5	95.4	 16
456	 11	162.3	19.9	 16
457	 11	236.3	33.8	 16
458	 11	193.3	23.0	 16
459	 11	264.8	30.8	 16
460	 11	360.5	50.2	 16
461	 11	87.5	11.6	 16
462	 11	95.8	13.1	 16
463	 11	380.3	53.1	 16
464	 11	206.0	19.4	 16
465	 11	82.0	14.8	 16
466	 11	146.0	26.4	 16
467	 11	60.5	11.2	 16
468	 11	266.0	21.4	 16
469	 11	1384.5	110.2	 16
470	 11	101.0	20.4	 16
471	 11	252.8	27.9	 16
472	 11	389.8	45.2	 16
473	 11	99.3	19.6	 16
474	 11	120.5	26.5	 16
475	 11	82.8	12.7	 16
476	 11	219.8	38.2	 16
477	 11	70.3	10.2	 16
478	 11	141.8	17.4	 16
479	 11	349.0	57.0	 16
480	 11	86.3	13.5	 16
481	 11	653.0	63.5	 16
482	 11	155.5	24.6	 16
483	 11	244.3	23.9	 16
484	 11	63.8	12.4	 16
485	 11	63.3	9.9	 16
486	 11	788.5	77.1	 16
487	 11	355.5	37.6	 16
488	 11	163.8	24.7	 16
489	 11	70.3	22.1	 16
490	 11	149.0	27.4	 16
491	 11	76.0	12.0	 16
492	 11	97.3	11.8	 16
493	 11	102.0	21.8	 16
494	 11	397.5	27.8	 16
495	 11	79.0	10.7	 16
496	 11	784.8	55.9	 16
497	 11	794.3	50.1	 16
498	 11	748.3	40.7	 16
499	 11	354.0	39.1	 16
500	 11	239.3	35.9	 16
501	 11	103.0	16.7	 16
502	 11	87.0	17.7	 16
503	 11	75.8	10.2	 16
504	 11	1287.3	114.9	 16
505	 11	94.8	21.9	 16
506	 11	71.0	14.0	 16
507	 11	59.3	14.6	 16
508	 11	57.3	8.4	 16
509	 11	75.5	11.9	 16
510	 11	176.8	23.5	 16
511	 11	190.5	25.7	 16
512	 11	87.8	18.4	 16
513	 11	134.8	18.3	 16
514	 11	135.3	15.5	 16
515	 11	77.8	19.7	 16
516	 11	136.3	18.1	 16
517	 11	746.3	95.4	 16
518	 11	79.5	13.6	 16
519	 11	794.5	117.0	 16
520	 11	2015.5	260.0	 16
521	 11	462.0	63.6	 16
522	 11	57.3	10.5	 16
523	 11	72.5	10.3	 16
524	 11	180.8	28.2	 16
525	 11	60.5	9.0	 16
526	 11	55.0	11.8	 16
527	 11	124.5	27.1	 16
528	 11	59.5	10.5	 16
529	 11	119.3	16.8	 16
530	 11	145.8	18.8	 16
531	 11	67.3	12.4	 16
532	 11	472.3	73.0	 16
533	 11	96.0	15.4	 16
534	 11	92.0	18.1	 16
535	 11	84.3	19.6	 16
536	 11	1313.0	152.6	 16
537	 11	1468.5	135.9	 16
538	 11	343.3	39.6	 16
539	 11	601.3	60.4	 16
540	 11	1717.3	271.2	 16
541	 11	136.5	27.2	 16
542	 11	77.3	17.5	 16
543	 11	127.5	13.7	 16
544	 11	78.5	15.1	 16
545	 11	479.8	73.1	 16
546	 11	172.8	34.1	 16
547	 11	442.8	81.2	 16
548	 11	201.8	29.3	 20
549	 11	77.3	18.5	 16
550	 11	465.5	60.3	 16
551	 11	204.0	42.0	 16
552	 11	88.0	14.5	 16
553	 11	167.8	23.1	 16
554	 11	2227.0	364.5	 16
555	 11	302.0	45.3	 16
556	 11	736.3	73.7	 16
557	 11	99.8	23.9	 16
558	 11	3570.5	419.7	 16
559	 11	157.8	25.6	 16
560	 11	480.5	67.5	 16
561	 11	995.5	121.6	 16
562	 11	580.5	65.0	 16
563	 11	325.5	55.4	 16
564	 11	256.0	47.6	 16
565	 11	233.8	36.4	 16
566	 11	77.8	16.7	 16
567	 11	119.3	15.2	 16
568	 11	291.3	41.6	 16
569	 11	580.5	79.6	 16
570	 11	5695.5	646.6	 16
571	 11	529.3	69.9	 16
572	 11	63.8	9.9	 16
573	 11	65.8	10.9	 16
574	 11	131.5	20.2	 16
575	 11	141.0	22.6	 16
576	 11	115.5	14.3	 16
577	 11	215.3	36.4	 16
578	 11	147.3	22.4	 16
579	 11	906.5	100.3	 16
580	 11	107.0	15.8	 16
581	 11	1148.8	120.9	 16
582	 11	96.0	13.5	 16
583	 11	175.0	25.7	 16
584	 11	62.5	11.3	 16
585	 11	221.0	36.3	 16
586	 11	144.5	31.3	 16
587	 11	478.3	69.6	 16
588	 11	83.3	14.7	 16
589	 11	1371.5	220.5	 16
590	 11	138.8	30.2	 16
591	 11	201.5	21.1	 16
592	 11	288.8	41.3	 16
593	 11	104.3	16.8	 16
594	 11	763.3	74.5	 16
595	 11	210.3	29.4	 16
596	 11	1899.3	114.1	 16
597	 11	442.0	35.1	 16
598	 11	145.0	24.5	 16
599	 11	168.8	24.4	 16
600	 11	76.0	15.4	 16
601	 11	156.8	26.5	 16
602	 11	185.8	20.9	 16
603	 11	183.3	28.3	 16
604	 11	112.0	17.7	 16
605	 11	99.5	20.3	 16
606	 11	169.5	23.0	 16
607	 11	74.3	14.5	 16
608	 11	74.0	14.8	 16
609	 11	171.8	25.5	 16
610	 11	61.3	12.5	 16
611	 11	886.0	161.4	 16
612	 11	603.0	56.3	 16
613	 11	246.3	26.1	 16
614	 11	561.3	56.5	 16
615	 11	120.3	13.7	 16
616	 11	107.3	26.5	 16
617	 11	93.5	20.5	 16
618	 11	88.3	19.3	 16
619	 11	624.5	72.0	 16
620	 11	82.3	18.5	 16
621	 11	68.0	11.4	 16
622	 11	84.5	12.3	 16
623	 11	70.5	16.4	 16
624	 11	207.8	33.9	 16
625	 11	105.8	25.7	 16
626	 11	167.0	23.7	 16
627	 11	820.3	125.5	 16
628	 11	163.8	23.5	 16
629	 11	80.0	14.1	 16
630	 11	186.0	37.1	 16
631	 11	530.0	79.4	 16
632	 11	470.3	63.5	 16
633	 11	146.5	26.4	 16
634	 11	352.3	51.9	 16
635	 11	76.0	10.4	 16
636	 11	63.3	15.7	 16
637	 11	322.5	45.0	 16
638	 11	195.8	31.6	 16
639	 11	70.3	15.2	 16
640	 11	127.8	25.9	 16
641	 11	129.0	15.0	 16
642	 11	93.3	18.0	 16
643	 11	750.8	99.6	 16
644	 11	205.5	28.8	 16
645	 11	90.0	13.0	 16
646	 11	79.3	13.8	 16
647	 11	88.0	14.0	 16
648	 11	247.3	30.5	 16
649	 11	485.3	50.6	 16
650	 11	72.8	12.9	 16
651	 11	270.0	36.9	 16
652	 11	212.5	42.4	 16
653	 11	62.3	15.6	 16
654	 11	54.5	8.4	 16
655	 11	315.8	61.6	 16
656	 11	83.8	17.2	 16
657	 11	61.3	11.5	 16
658	 11	425.8	65.5	 16
659	 11	113.5	22.6	 16
660	 11	178.3	26.7	 16
661	 11	70.3	12.3	 16
662	 11	93.3	14.9	 16
663	 11	2438.3	347.1	 16
664	 11	1631.3	213.2	 16
665	 11	531.8	70.9	 16
666	 11	465.3	45.9	 16
667	 11	92.3	13.9	 16
668	 11	180.5	25.1	 16
669	 11	939.8	113.1	 16
670	 11	643.5	106.4	 16
671	 11	2117.3	298.1	 16
672	 11	384.3	35.6	 16
673	 11	127.3	21.1	 16
674	 11	101.3	20.3	 16
675	 11	215.8	31.2	 16
676	 11	67.3	10.6	 16
677	 11	531.3	63.2	 16
678	 11	911.0	148.0	 16
679	 11	158.5	25.4	 16
680	 11	209.8	27.4	 16
681	 11	114.3	21.8	 16
682	 11	1744.3	245.3	 16
683	 11	186.5	24.4	 16
684	 11	1022.3	178.9	 16
685	 11	213.5	23.5	 16
686	 11	147.3	22.6	 16
687	 11	91.8	13.1	 16
688	 11	122.5	25.0	 16
689	 11	77.5	8.4	 16
690	 11	76.8	12.8	 16
691	 11	65.3	9.2	 20
692	 11	93.3	16.3	 16
693	 11	61.0	10.8	 16
694	 11	200.0	25.2	 16
695	 11	116.3	14.8	 16
696	 11	69.0	9.4	 16
697	 11	1277.8	233.1	 16
698	 11	586.0	80.3	 16
699	 11	996.0	139.5	 16
700	 11	195.3	35.1	 16
701	 11	283.8	44.4	 16
702	 11	816.5	124.4	 16
703	 11	573.8	100.8	 16
704	 11	85.5	22.1	 16
705	 11	648.0	101.6	 16
706	 11	365.8	47.8	 16
707	 11	124.8	21.8	 16
708	 11	138.3	21.1	 16
709	 11	148.8	18.4	 16
710	 11	380.0	43.0	 16
711	 11	112.3	11.6	 16
  0	 12	10433.5	1247.6	 16
  1	 12	147.5	25.0	 16
  2	 12	92.5	12.0	 16
  3	 12	110.0	16.4	 16
  4	 12	97.3	13.9	 16
  5	 12	134.3	27.3	 16
  6	 12	80.8	11.3	 16
  7	 12	250.8	27.2	 16
  8	 12	157.5	21.7	 16
  9	 12	102.3	18.3	 16
 10	 12	98.3	13.9	 16
 11	 12	71.3	11.8	 16
 12	 12	66.8	10.1	 16
 13	 12	75.3	15.1	 16
 14	 12	81.3	12.5	 16
 15	 12	70.3	10.3	 16
 16	 12	83.3	12.6	 16
 17	 12	74.5	29.1	 16
 18	 12	67.5	11.1	 16
 19	 12	82.3	13.9	 16
 20	 12	85.8	13.4	 16
 21	 12	73.3	18.6	 16
 22	 12	64.5	9.1	 16
 23	 12	65.3	9.4	 16
 24	 12	60.8	12.3	 16
 25	 12	61.0	12.0	 16
 26	 12	84.0	15.7	 16
 27	 12	60.5	10.7	 16
 28	 12	81.0	17.8	 16
 29	 12	70.5	17.4	 16
 30	 12	67.0	6.7	 16
 31	 12	64.3	11.3	 16
 32	 12	78.5	21.8	 16
 33	 12	71.0	20.5	 16
 34	 12	55.5	5.7	 16
 35	 12	65.3	11.8	 16
 36	 12	73.3	16.8	 16
 37	 12	66.3	11.3	 16
 38	 12	61.5	14.8	 16
 39	 12	62.0	12.2	 16
 40	 12	68.3	14.6	 16
 41	 12	83.0	95.7	 16
 42	 12	63.8	14.5	 16
 43	 12	63.3	11.3	 16
 44	 12	56.0	7.7	 16
 45	 12	58.8	13.1	 16
 46	 12	58.8	15.2	 16
 47	 12	63.8	15.7	 16
 48	 12	64.0	16.1	 16
 49	 12	51.8	9.8	 16
 50	 12	58.5	10.3	 16
 51	 12	59.5	12.0	 16
 52	 12	58.5	10.5	 16
 53	 12	58.3	10.6	 16
 54	 12	54.3	10.0	 16
 55	 12	50.0	7.7	 16
 56	 12	52.3	11.5	 16
 57	 12	49.5	9.4	 16
 58	 12	49.3	9.4	 16
 59	 12	45.5	9.9	 16
 60	 12	56.5	10.0	 16
 61	 12	46.3	7.5	 16
 62	 12	56.3	10.2	 16
 63	 12	58.8	13.8	 16
 64	 12	56.0	13.8	 16
 65	 12	58.8	10.7	 16
 66	 12	56.5	8.4	 16
 67	 12	54.5	8.3	 16
 68	 12	61.3	12.9	 16
 69	 12	57.0	19.2	 16
 70	 12	72.0	17.8	 16
 71	 12	64.0	10.2	 16
 72	 12	50.0	10.7	 16
 73	 12	52.0	11.4	 16
 74	 12	47.0	9.0	 16
 75	 12	49.0	8.8	 16
 76	 12	53.3	9.4	 16
 77	 12	57.3	6.0	 16
 78	 12	61.0	15.7	 16
 79	 12	52.3	11.9	 16
 80	 12	53.3	10.3	 16
 81	 12	61.0	10.2	 16
 82	 12	61.5	10.7	 16
 83	 12	52.3	12.0	 16
 84	 12	59.8	13.1	 16
 85	 12	47.0	6.9	 16
 86	 12	50.5	9.5	 16
 87	 12	62.3	13.3	 16
 88	 12	61.3	11.2	 16
 89	 12	58.5	10.5	 16
 90	 12	64.0	13.4	 16
 91	 12	59.0	14.0	 16
 92	 12	61.0	12.5	 16
 93	 12	60.0	12.2	 16
 94	 12	59.3	12.2	 16
 95	 12	56.3	10.5	 16
 96	 12	46.5	7.7	 16
 97	 12	54.0	9.2	 16
 98	 12	54.5	13.1	 16
 99	 12	57.8	10.3	 16
100	 12	56.3	7.5	 12
101	 12	55.5	15.2	 16
102	 12	70.3	12.9	 16
103	 12	48.3	8.7	 16
104	 12	53.3	10.3	 16
105	 12	55.8	10.3	 16
106	 12	49.0	7.1	 16
107	 12	55.3	11.3	 16
108	 12	53.3	10.9	 16
109	 12	60.8	8.0	 16
110	 12	57.0	9.1	 16
111	 12	72.3	12.2	 16
112	 12	184.3	25.1	 16
113	 12	479.0	48.2	 16
114	 12	170.5	19.3	 16
115	 12	177.0	23.0	 16
116	 12	145.0	23.1	 16
117	 12	70.3	13.0	 16
118	 12	64.3	13.8	 16
119	 12	112.3	13.7	 16
120	 12	111.8	16.5	 16
121	 12	106.3	24.1	 16
122	 12	131.8	17.9	 16
123	 12	198.0	42.9	 16
124	 12	288.0	48.0	 16
125	 12	72.5	14.7	 16
126	 12	95.8	18.5	 20
127	 12	166.3	34.6	 16
128	 12	81.5	15.5	 16
129	 12	97.0	17.5	 16
130	 12	422.8	105.6	 16
131	 12	70.0	17.1	 16
132	 12	85.0	14.1	 16
133	 12	96.8	17.8	 16
134	 12	85.8	14.4	 16
135	 12	165.3	33.2	 16
136	 12	65.5	15.4	 16
137	 12	61.8	12.4	 16
138	 12	59.8	10.5	 16
139	 12	64.0	11.7	 16
140	 12	75.0	17.9	 16
141	 12	104.0	23.6	 16
142	 12	427.8	98.8	 16
143	 12	350.5	71.9	 16
144	 12	84.0	17.5	 16
145	 12	73.5	13.6	 16
146	 12	93.8	17.1	 16
147	 12	61.3	9.4	 16
148	 12	78.0	17.8	 16
149	 12	111.5	31.7	 16
150	 12	82.5	16.7	 16
151	 12	184.8	29.4	 16
152	 12	120.5	17.8	 16
153	 12	325.8	64.3	 16
154	 12	1469.8	223.0	 16
155	 12	85.0	13.2	 16
156	 12	70.0	10.1	 16
157	 12	195.8	34.9	 16
158	 12	743.8	108.3	 16
159	 12	141.0	20.5	 16
160	 12	68.5	12.5	 16
161	 12	251.5	51.4	 16
162	 12	62.5	10.3	 16
163	 12	74.3	12.2	 16
164	 12	69.0	10.8	 16
165	 12	69.3	13.0	 16
166	 12	199.0	28.8	 16
167	 12	61.0	8.2	 16
168	 12	70.5	15.4	 16
169	 12	69.3	12.8	 16
170	 12	157.5	35.8	 16
171	 12	58.5	8.7	 16
172	 12	92.8	11.7	 16
173	 12	84.8	13.7	 16
174	 12	75.5	13.1	 16
175	 12	104.0	12.9	 16
176	 12	135.8	19.1	 16
177	 12	135.3	27.5	 16
178	 12	95.3	14.3	 16
179	 12	80.5	18.0	 16
180	 12	79.5	9.7	 16
181	 12	227.5	47.4	 16
182	 12	137.8	19.2	 16
183	 12	67.5	13.4	 16
184	 12	75.0	10.2	 16
185	 12	93.0	20.0	 16
186	 12	72.5	10.6	 16
187	 12	256.0	40.4	 16
188	 12	110.5	17.1	 16
189	 12	184.0	27.3	 12
190	 12	84.3	17.6	 16
191	 12	82.5	15.6	 16
192	 12	117.5	16.9	 16
193	 12	71.0	15.7	 16
194	 12	232.8	51.6	 16
195	 12	97.3	112.4	 16
196	 12	125.3	20.9	 16
197	 12	76.5	13.1	 16
198	 12	104.0	19.3	 16
199	 12	353.8	38.6	 16
200	 12	81.3	16.8	 16
201	 12	85.5	15.3	 16
202	 12	201.8	31.7	 16
203	 12	64.5	21.9	 16
204	 12	62.3	11.1	 16
205	 12	66.0	12.0	 16
206	 12	66.8	12.7	 16
207	 12	60.0	11.3	 16
208	 12	76.3	20.8	 16
209	 12	137.8	25.0	 16
210	 12	89.3	21.4	 16
211	 12	70.5	9.0	 16
212	 12	137.0	18.5	 16
213	 12	140.3	23.2	 16
214	 12	195.8	23.6	 16
215	 12	604.5	78.3	 16
216	 12	470.8	79.1	 16
217	 12	117.3	24.9	 16
218	 12	81.3	15.2	 16
219	 12	98.3	16.0	 16
220	 12	69.3	11.8	 16
221	 12	171.0	22.8	 16
222	 12	722.0	97.4	 16
223	 12	95.0	11.1	 16
224	 12	63.3	10.1	 16
225	 12	139.3	18.3	 16
226	 12	102.3	21.9	 16
227	 12	67.5	13.1	 16
228	 12	79.5	11.9	 16
229	 12	203.5	37.1	 16
230	 12	268.5	34.0	 16
231	 12	175.8	22.3	 16
232	 12	128.3	17.6	 16
233	 12	80.5	10.7	 16
234	 12	86.0	18.4	 16
235	 12	170.8	23.7	 16
236	 12	180.8	24.8	 16
237	 12	115.5	28.7	 16
238	 12	136.5	33.0	 16
239	 12	84.3	12.2	 16
240	 12	250.5	37.0	 16
241	 12	114.3	15.1	 16
242	 12	148.3	20.6	 16
243	 12	69.8	15.8	 16
244	 12	82.3	14.2	 16
245	 12	92.0	15.8	 16
246	 12	66.3	12.4	 16
247	 12	72.3	16.2	 16
248	 12	105.5	19.4	 16
249	 12	84.3	13.6	 16
250	 12	119.8	24.6	 16
251	 12	88.5	15.4	 16
252	 12	77.5	14.7	 16
253	 12	95.5	15.0	 16
254	 12	76.3	14.8	 16
255	 12	72.3	18.9	 16
256	 12	73.0	14.0	 16
257	 12	70.5	12.9	 16
258	 12	127.5	26.5	 16
259	 12	130.5	22.9	 16
260	 12	81.0	10.0	 16
261	 12	66.3	13.7	 16
262	 12	79.8	14.0	 16
263	 12	92.5	10.8	 16
264	 12	71.3	12.1	 16
265	 12	70.8	15.6	 16
266	 12	457.0	49.1	 16
267	 12	161.8	22.6	 16
268	 12	137.5	20.6	 20
269	 12	134.3	22.2	 16
270	 12	138.5	17.5	 16
271	 12	131.0	28.5	 16
272	 12	64.3	9.1	 16
273	 12	63.8	12.7	 16
274	 12	185.8	37.6	 16
275	 12	225.0	29.7	 16
276	 12	69.3	10.1	 16
277	 12	80.3	16.5	 16
278	 12	181.0	38.2	 12
279	 12	148.0	32.3	 16
280	 12	79.5	19.8	 16
281	 12	111.0	21.4	 16
282	 12	207.0	24.6	 16
283	 12	90.3	13.1	 16
284	 12	65.8	14.4	 16
285	 12	63.8	10.7	 16
286	 12	163.0	22.4	 16
287	 12	108.0	22.5	 16
288	 12	499.0	83.4	 16
289	 12	186.3	31.8	 16
290	 12	69.8	14.8	 16
291	 12	71.8	11.7	 16
292	 12	90.5	15.7	 16
293	 12	149.0	25.2	 16
294	 12	70.8	13.5	 16
295	 12	210.3	76.3	 16
296	 12	215.3	28.3	 16
297	 12	168.5	28.4	 16
298	 12	69.5	16.1	 16
299	 12	193.3	31.6	 16
300	 12	136.0	23.2	 16
301	 12	90.8	15.2	 16
302	 12	126.5	28.0	 16
303	 12	150.8	31.0	 16
304	 12	169.0	16.8	 16
305	 12	855.8	99.1	 16
306	 12	149.3	21.3	 16
307	 12	106.5	13.4	 16
308	 12	235.0	33.5	 16
309	 12	425.3	42.9	 16
310	 12	76.5	10.2	 16
311	 12	104.0	14.1	 16
312	 12	66.5	15.3	 16
313	 12	343.5	47.8	 16
314	 12	107.0	18.4	 16
315	 12	64.8	12.0	 16
316	 12	65.3	10.8	 16
317	 12	83.3	18.1	 16
318	 12	59.8	22.0	 16
319	 12	68.0	19.0	 16
320	 12	69.3	12.4	 16
321	 12	98.8	24.5	 16
322	 12	65.5	9.8	 16
323	 12	248.8	28.4	 16
324	 12	287.5	41.2	 16
325	 12	68.3	18.9	 16
326	 12	113.8	15.0	 16
327	 12	85.0	17.8	 16
328	 12	75.0	13.6	 16
329	 12	87.5	14.7	 16
330	 12	192.8	31.5	 16
331	 12	67.8	11.2	 16
332	 12	68.0	11.1	 16
333	 12	100.3	15.7	 16
334	 12	72.0	11.1	 16
335	 12	113.0	14.3	 16
336	 12	63.0	10.5	 16
337	 12	86.5	42.3	 16
338	 12	57.0	11.6	 16
339	 12	67.5	19.7	 16
340	 12	76.8	14.6	 16
341	 12	196.3	17.9	 16
342	 12	158.8	19.1	 16
343	 12	75.0	18.7	 16
344	 12	90.0	17.0	 16
345	 12	76.0	12.5	 16
346	 12	65.0	11.2	 16
347	 12	62.3	11.2	 16
348	 12	72.3	13.1	 16
349	 12	57.5	10.0	 16
350	 12	630.5	62.9	 16
351	 12	65.5	15.9	 16
352	 12	87.5	17.2	 16
353	 12	136.5	17.8	 16
354	 12	166.3	30.4	 16
355	 12	311.5	37.0	 16
356	 12	309.3	29.5	 16
357	 12	117.3	29.9	 16
358	 12	85.3	16.9	 16
359	 12	72.3	13.1	 16
360	 12	113.3	18.6	 16
361	 12	380.0	27.0	 16
362	 12	71.5	10.7	 16
363	 12	64.3	11.3	 16
364	 12	72.5	13.8	 16
365	 12	61.8	20.4	 16
366	 12	65.5	11.3	 16
367	 12	70.5	16.3	 12
368	 12	64.0	10.9	 16
369	 12	111.0	19.4	 16
370	 12	108.0	19.8	 16
371	 12	292.0	27.4	 16
372	 12	200.3	24.6	 16
373	 12	83.5	16.9	 16
374	 12	67.0	9.5	 16
375	 12	201.3	25.3	 16
376	 12	56.3	9.6	 16
377	 12	74.0	11.1	 16
378	 12	111.0	17.8	 16
379	 12	73.0	10.8	 16
380	 12	54.5	7.8	 16
381	 12	117.0	19.7	 16
382	 12	118.0	22.1	 16
383	 12	79.5	12.6	 16
384	 12	126.3	25.9	 16
385	 12	55.5	10.7	 16
386	 12	65.5	10.9	 16
387	 12	71.8	12.1	 16
388	 12	57.5	8.1	 16
389	 12	76.3	14.3	 16
390	 12	86.5	14.7	 16
391	 12	60.0	11.1	 16
392	 12	58.3	12.0	 16
393	 12	99.8	19.6	 16
394	 12	86.8	19.1	 16
395	 12	79.0	14.1	 16
396	 12	125.0	26.2	 16
397	 12	448.3	46.1	 16
398	 12	241.8	38.1	 16
399	 12	125.8	20.4	 16
400	 12	106.0	12.1	 16
401	 12	108.3	11.8	 16
402	 12	83.3	12.4	 16
403	 12	70.0	18.9	 16
404	 12	69.0	11.7	 16
405	 12	66.5	10.8	 16
406	 12	80.8	10.6	 16
407	 12	53.0	7.7	 16
408	 12	80.0	16.7	 16
409	 12	140.3	17.5	 16
410	 12	244.3	36.3	 20
411	 12	109.0	19.6	 16
412	 12	84.3	15.3	 16
413	 12	82.3	19.0	 16
414	 12	83.8	18.9	 16
415	 12	146.5	19.8	 16
416	 12	113.5	19.7	 16
417	 12	112.3	17.6	 16
418	 12	192.0	23.6	 16
419	 12	88.0	14.1	 16
420	 12	64.0	9.8	 16
421	 12	145.8	21.8	 16
422	 12	65.0	12.5	 16
423	 12	110.5	17.4	 16
424	 12	365.0	40.9	 16
425	 12	422.5	55.4	 16
426	 12	184.3	30.5	 16
427	 12	77.5	16.4	 16
428	 12	65.0	8.9	 16
429	 12	89.3	14.4	 16
430	 12	124.3	19.1	 16
431	 12	70.0	16.3	 16
432	 12	73.8	12.0	 16
433	 12	76.0	10.7	 16
434	 12	62.5	7.4	 16
435	 12	70.5	12.5	 16
436	 12	84.3	15.8	 16
437	 12	103.3	23.1	 16
438	 12	740.5	97.9	 16
439	 12	89.5	11.6	 16
440	 12	79.8	11.1	 16
441	 12	357.5	46.4	 16
442	 12	92.5	14.9	 16
443	 12	147.0	21.5	 16
444	 12	68.3	11.2	 16
445	 12	256.0	33.6	 16
446	 12	76.3	14.5	 16
447	 12	113.5	16.6	 16
448	 12	73.0	14.0	 16
449	 12	69.0	11.7	 16
450	 12	100.8	18.6	 16
451	 12	102.0	12.6	 16
452	 12	71.0	6.1	 16
453	 12	59.8	10.9	 16
454	 12	78.3	9.2	 16
455	 12	65.5	9.6	 16
456	 12	76.5	13.6	 12
457	 12	172.0	23.1	 16
458	 12	141.5	17.0	 16
459	 12	110.8	16.2	 16
460	 12	74.8	15.4	 16
461	 12	115.5	21.2	 16
462	 12	174.5	22.6	 16
463	 12	484.0	64.5	 16
464	 12	135.8	20.2	 16
465	 12	63.5	13.8	 16
466	 12	70.3	16.9	 16
467	 12	57.5	12.9	 16
468	 12	77.5	14.2	 16
469	 12	279.0	27.7	 16
470	 12	113.8	20.0	 16
471	 12	307.8	34.8	 16
472	 12	260.5	31.0	 16
473	 12	85.3	16.7	 16
474	 12	57.0	12.7	 16
475	 12	73.3	11.2	 16
476	 12	94.0	16.0	 16
477	 12	68.5	14.4	 16
478	 12	84.3	18.7	 16
479	 12	84.0	14.2	 16
480	 12	94.8	11.1	 16
481	 12	208.0	24.6	 16
482	 12	100.3	15.0	 16
483	 12	66.3	9.8	 16
484	 12	76.5	15.7	 16
485	 12	68.5	11.3	 16
486	 12	154.0	21.6	 16
487	 12	75.0	12.5	 16
488	 12	69.8	12.4	 16
489	 12	66.8	11.9	 16
490	 12	68.0	12.3	 16
491	 12	67.0	12.1	 16
492	 12	84.0	23.8	 16
493	 12	86.0	19.4	 16
494	 12	514.3	54.2	 16
495	 12	89.3	18.1	 16
496	 12	4381.0	241.1	 16
497	 12	4502.0	189.8	 16
498	 12	4460.3	147.8	 16
499	 12	303.5	46.3	 16
500	 12	100.5	18.3	 16
501	 12	61.8	8.2	 16
502	 12	69.3	11.3	 16
503	 12	71.3	16.6	 16
504	 12	149.0	30.7	 16
505	 12	65.3	12.4	 16
506	 12	67.8	14.6	 16
507	 12	71.3	11.0	 16
508	 12	77.8	13.4	 16
509	 12	66.5	12.7	 16
510	 12	119.8	22.8	 16
511	 12	251.3	40.5	 16
512	 12	79.0	13.3	 16
513	 12	146.8	24.2	 16
514	 12	126.8	18.6	 16
515	 12	74.5	13.7	 16
516	 12	76.5	9.5	 16
517	 12	90.5	19.0	 16
518	 12	73.3	13.4	 16
519	 12	88.3	16.0	 16
520	 12	140.3	29.2	 16
521	 12	143.0	20.3	 16
522	 12	66.3	12.6	 16
523	 12	66.5	13.1	 16
524	 12	355.0	39.0	 16
525	 12	58.0	10.6	 16
526	 12	53.0	10.6	 16
527	 12	53.5	12.2	 16
528	 12	60.0	13.7	 16
529	 12	201.0	41.5	 16
530	 12	66.5	13.6	 16
531	 12	65.3	15.0	 16
532	 12	82.0	12.2	 16
533	 12	92.0	15.3	 16
534	 12	64.5	14.2	 16
535	 12	70.8	11.5	 16
536	 12	263.5	47.1	 16
537	 12	280.3	33.6	 16
538	 12	146.3	27.5	 16
539	 12	363.8	31.6	 16
540	 12	375.5	52.2	 16
541	 12	160.8	24.5	 16
542	 12	153.5	19.4	 16
543	 12	89.3	17.1	 16
544	 12	67.0	9.9	 16
545	 12	80.0	13.9	 12
546	 12	78.3	11.3	 16
547	 12	136.5	19.6	 16
548	 12	117.8	16.9	 16
549	 12	78.8	12.7	 16
550	 12	96.5	18.8	 16
551	 12	71.5	13.8	 16
552	 12	69.3	11.8	 16
553	 12	78.0	11.6	 20
554	 12	274.0	47.7	 16
555	 12	101.0	9.5	 16
556	 12	135.0	20.8	 16
557	 12	91.3	14.5	 16
558	 12	375.0	47.1	 16
559	 12	132.5	21.2	 16
560	 12	718.5	69.0	 16
561	 12	656.0	68.4	 16
562	 12	180.8	24.4	 16
563	 12	145.5	12.3	 16
564	 12	125.0	26.1	 16
565	 12	139.5	18.9	 16
566	 12	80.5	7.8	 16
567	 12	180.0	24.9	 16
568	 12	63.3	9.1	 16
569	 12	91.0	13.8	 16
570	 12	838.5	191.6	 16
571	 12	228.8	33.9	 16
572	 12	63.5	15.1	 16
573	 12	58.3	9.8	 16
574	 12	86.3	14.1	 16
575	 12	67.3	9.8	 16
576	 12	62.8	11.0	 16
577	 12	102.3	12.8	 16
578	 12	148.0	19.8	 16
579	 12	250.3	28.6	 16
580	 12	85.8	14.0	 16
581	 12	405.5	53.7	 16
582	 12	73.3	11.6	 16
583	 12	260.0	38.2	 16
584	 12	83.0	19.9	 16
585	 12	334.3	58.2	 16
586	 12	526.8	65.0	 16
587	 12	102.3	17.4	 16
588	 12	79.0	11.5	 16
589	 12	193.8	28.2	 16
590	 12	101.8	14.5	 16
591	 12	118.0	15.5	 16
592	 12	133.5	24.0	 16
593	 12	73.3	15.5	 16
594	 12	357.0	41.8	 16
595	 12	110.3	21.1	 16
596	 12	380.0	67.1	 16
597	 12	167.0	28.5	 16
598	 12	159.5	21.6	 16
599	 12	133.5	15.0	 16
600	 12	526.0	62.1	 16
601	 12	141.5	22.1	 16
602	 12	141.0	19.8	 16
603	 12	109.0	17.8	 16
604	 12	100.3	17.9	 16
605	 12	60.3	15.0	 16
606	 12	66.5	10.2	 16
607	 12	62.0	13.8	 16
608	 12	60.3	11.7	 16
609	 12	61.3	10.3	 16
610	 12	63.3	10.0	 16
611	 12	99.5	20.8	 16
612	 12	116.0	25.8	 16
613	 12	256.8	40.6	 16
614	 12	179.3	32.7	 16
615	 12	102.3	16.8	 16
616	 12	69.0	12.3	 16
617	 12	78.5	11.1	 16
618	 12	78.3	11.7	 16
619	 12	441.3	56.2	 16
620	 12	79.5	14.8	 16
621	 12	72.5	16.7	 16
622	 12	65.8	14.8	 16
623	 12	66.3	14.4	 16
624	 12	65.8	12.0	 16
625	 12	69.3	44.9	 16
626	 12	77.3	12.6	 16
627	 12	98.5	19.2	 16
628	 12	75.3	10.9	 16
629	 12	95.3	16.4	 16
630	 12	211.8	68.1	 16
631	 12	304.5	92.4	 16
632	 12	191.0	23.5	 16
633	 12	112.3	15.0	 16
634	 12	249.8	21.5	 12
635	 12	84.3	18.0	 16
636	 12	62.5	12.7	 16
637	 12	67.0	8.9	 16
638	 12	82.8	16.6	 16
639	 12	64.8	8.8	 16
640	 12	226.8	28.1	 16
641	 12	119.5	18.9	 16
642	 12	84.3	20.9	 16
643	 12	107.3	16.8	 16
644	 12	114.0	16.8	 16
645	 12	108.3	34.3	 16
646	 12	98.0	24.3	 16
647	 12	115.5	16.8	 16
648	 12	115.3	17.9	 16
649	 12	259.0	43.0	 16
650	 12	73.8	16.1	 16
651	 12	75.0	10.2	 16
652	 12	86.8	14.8	 16
653	 12	64.3	11.8	 16
654	 12	64.0	12.6	 16
655	 12	110.0	19.7	 16
656	 12	65.3	9.5	 16
657	 12	55.3	9.7	 16
658	 12	116.8	22.3	 16
659	 12	74.5	8.4	 16
660	 12	79.5	13.9	 16
661	 12	76.3	14.5	 16
662	 12	123.5	16.4	 16
663	 12	322.3	37.0	 16
664	 12	280.5	32.2	 16
665	 12	105.3	14.0	 16
666	 12	209.0	25.3	 16
667	 12	71.0	10.2	 16
668	 12	118.5	20.8	 16
669	 12	284.8	40.6	 16
670	 12	241.5	39.6	 16
671	 12	413.5	42.1	 16
672	 12	557.0	42.3	 16
673	 12	68.0	15.6	 16
674	 12	97.5	15.0	 16
675	 12	73.0	10.7	 16
676	 12	60.3	9.7	 16
677	 12	122.8	27.9	 16
678	 12	221.8	31.9	 16
679	 12	222.0	51.8	 16
680	 12	286.3	34.4	 16
681	 12	162.3	18.0	 16
682	 12	248.3	45.7	 16
683	 12	173.0	23.6	 16
684	 12	134.0	30.3	 16
685	 12	216.0	22.5	 16
686	 12	96.3	9.2	 16
687	 12	73.8	17.4	 16
688	 12	69.0	12.9	 16
689	 12	68.0	12.0	 16
690	 12	81.5	13.0	 16
691	 12	74.5	13.8	 16
692	 12	62.8	10.4	 16
693	 12	77.8	14.4	 16
694	 12	110.3	13.3	 16
695	 12	87.3	17.7	 20
696	 12	60.5	13.5	 16
697	 12	149.5	27.0	 16
698	 12	73.5	13.1	 16
699	 12	162.3	24.4	 16
700	 12	286.5	23.6	 16
701	 12	95.5	17.8	 16
702	 12	120.8	21.9	 16
703	 12	95.3	15.7	 16
704	 12	78.8	13.9	 16
705	 12	139.5	21.6	 16
706	 12	140.3	18.2	 16
707	 12	139.3	26.6	 16
708	 12	168.5	20.0	 16
709	 12	135.5	17.7	 16
710	 12	111.0	14.2	 16
711	 12	6769.3	917.3	 16
  0	 13	146.5	16.3	 16
  1	 13	219.0	34.3	 16
  2	 13	115.0	17.7	 16
  3	 13	122.3	16.8	 16
  4	 13	205.8	34.5	 16
  5	 13	180.0	30.0	 16
  6	 13	100.0	19.8	 16
  7	 13	249.8	29.9	 16
  8	 13	152.8	25.8	 16
  9	 13	272.8	34.4	 16
 10	 13	224.0	25.1	 16
 11	 13	81.0	13.4	 16
 12	 13	86.5	14.0	 16
 13	 13	112.5	17.9	 16
 14	 13	88.0	18.0	 16
 15	 13	234.3	30.2	 16
 16	 13	539.8	54.6	 16
 17	 13	914.8	120.4	 16
 18	 13	184.3	30.9	 16
 19	 13	131.5	18.9	 16
 20	 13	240.3	31.5	 16
 21	 13	420.3	52.3	 16
 22	 13	82.0	11.7	 16
 23	 13	109.8	18.6	 16
 24	 13	87.0	12.8	 16
 25	 13	292.3	43.6	 16
 26	 13	94.8	16.4	 16
 27	 13	1445.5	136.5	 16
 28	 13	298.3	45.0	 16
 29	 13	77.3	12.8	 16
 30	 13	79.8	13.8	 16
 31	 13	1861.0	228.4	 16
 32	 13	92.5	14.8	 16
 33	 13	517.8	94.6	 16
 34	 13	1236.3	239.5	 16
 35	 13	855.8	189.8	 16
 36	 13	136.5	27.2	 16
 37	 13	778.3	103.2	 16
 38	 13	94.3	12.3	 16
 39	 13	216.0	26.8	 16
 40	 13	181.5	30.3	 16
 41	 13	168.5	25.3	 16
 42	 13	229.3	40.4	 16
 43	 13	89.3	10.2	 16
 44	 13	70.3	15.4	 16
 45	 13	188.3	22.7	 16
 46	 13	1277.0	133.0	 16
 47	 13	5936.5	462.0	 16
 48	 13	188.8	22.3	 16
 49	 13	95.0	23.7	 16
 50	 13	117.0	15.6	 16
 51	 13	2806.0	245.4	 16
 52	 13	145.5	21.0	 16
 53	 13	71.0	11.0	 16
 54	 13	78.8	14.9	 16
 55	 13	79.3	15.0	 16
 56	 13	71.5	12.9	 16
 57	 13	77.3	9.4	 16
 58	 13	89.0	16.8	 16
 59	 13	95.0	17.3	 16
 60	 13	103.5	19.5	 16
 61	 13	98.5	13.5	 16
 62	 13	127.3	20.1	 16
 63	 13	123.3	24.2	 16
 64	 13	3622.8	240.4	 16
 65	 13	574.3	59.5	 16
 66	 13	110.3	14.7	 16
 67	 13	204.5	28.5	 16
 68	 13	659.0	78.7	 16
 69	 13	131.0	21.2	 16
 70	 13	68.3	11.1	 16
 71	 13	362.3	43.7	 16
 72	 13	70.5	80.0	 16
 73	 13	64.3	9.2	 16
 74	 13	528.3	71.7	 16
 75	 13	72.3	17.6	 16
 76	 13	85.3	16.0	 16
 77	 13	2782.5	236.5	 16
 78	 13	396.0	47.3	 16
 79	 13	68.3	10.7	 16
 80	 13	589.8	71.5	 16
 81	 13	80.3	13.0	 16
 82	 13	444.8	57.9	 16
 83	 13	154.3	25.5	 16
 84	 13	63.8	12.3	 16
 85	 13	62.3	13.3	 16
 86	 13	176.3	31.1	 16
 87	 13	97.5	18.4	 16
 88	 13	555.5	62.3	 16
 89	 13	927.8	64.5	 16
 90	 13	254.5	33.9	 16
 91	 13	942.3	160.5	 16
 92	 13	95.3	18.3	 16
 93	 13	84.0	13.5	 16
 94	 13	134.3	27.5	 16
 95	 13	89.3	16.6	 16
 96	 13	126.5	20.2	 16
 97	 13	74.0	14.4	 16
 98	 13	78.5	18.9	 16
 99	 13	75.3	19.1	 16
100	 13	170.5	27.2	 16
101	 13	1456.8	127.7	 16
102	 13	81.5	15.2	 16
103	 13	127.5	16.6	 16
104	 13	74.5	15.9	 16
105	 13	122.0	19.7	 16
106	 13	484.0	77.3	 16
107	 13	74.3	18.3	 16
108	 13	145.3	27.8	 16
109	 13	83.8	18.0	 16
110	 13	110.3	16.5	 16
111	 13	287.5	45.6	 16
112	 13	768.8	84.1	 16
113	 13	96.5	20.7	 16
114	 13	70.5	14.3	 16
115	 13	173.8	30.8	 16
116	 13	141.3	22.5	 16
117	 13	363.3	37.7	 16
118	 13	105.0	15.9	 16
119	 13	109.0	13.8	 16
120	 13	2716.5	296.1	 16
121	 13	199.0	28.0	 16
122	 13	71.8	13.3	 16
123	 13	125.3	20.6	 16
124	 13	221.3	31.6	 16
125	 13	89.3	13.5	 16
126	 13	2391.3	286.5	 16
127	 13	149.3	20.3	 16
128	 13	170.3	24.0	 16
129	 13	714.3	96.9	 16
130	 13	95.0	16.9	 20
131	 13	582.3	106.2	 16
132	 13	652.5	145.4	 16
133	 13	651.3	133.2	 16
134	 13	3449.5	802.7	 16
135	 13	156.3	24.7	 16
136	 13	71.0	9.9	 16
137	 13	306.0	62.3	 16
138	 13	363.3	75.3	 16
139	 13	281.0	60.1	 16
140	 13	217.0	42.6	 16
141	 13	84.5	19.9	 16
142	 13	988.5	249.2	 16
143	 13	96.0	13.9	 16
144	 13	284.0	52.4	 16
145	 13	773.8	128.7	 16
146	 13	2496.5	510.3	 16
147	 13	89.0	15.6	 16
148	 13	743.3	102.3	 16
149	 13	100.3	15.4	 16
150	 13	171.5	27.4	 16
151	 13	82.3	15.2	 16
152	 13	163.3	31.6	 16
153	 13	8303.0	1175.9	 16
154	 13	587.0	98.4	 16
155	 13	90.5	18.9	 16
156	 13	136.0	22.3	 16
157	 13	104.5	14.5	 16
158	 13	130.8	21.5	 16
159	 13	272.5	39.6	 16
160	 13	68.3	10.1	 16
161	 13	162.3	28.0	 16
162	 13	79.0	14.8	 16
163	 13	64.3	10.6	 16
164	 13	112.0	20.2	 16
165	 13	608.5	77.7	 16
166	 13	75.0	10.8	 16
167	 13	250.5	42.4	 16
168	 13	82.8	15.9	 16
169	 13	128.0	30.6	 16
170	 13	133.5	31.8	 16
171	 13	68.0	14.3	 16
172	 13	241.3	21.0	 16
173	 13	60.8	11.1	 16
174	 13	186.3	30.5	 16
175	 13	100.8	22.5	 16
176	 13	123.3	19.9	 16
177	 13	66.3	12.1	 16
178	 13	362.0	53.5	 16
179	 13	89.5	13.4	 16
180	 13	510.8	70.5	 16
181	 13	199.8	26.5	 16
182	 13	338.0	42.3	 16
183	 13	122.3	21.7	 16
184	 13	194.5	19.8	 16
185	 13	64.0	11.5	 16
186	 13	2586.3	211.3	 16
187	 13	711.0	64.0	 16
188	 13	173.5	26.8	 16
189	 13	89.8	60.6	 16
190	 13	427.8	63.1	 16
191	 13	211.0	25.5	 16
192	 13	326.3	28.6	 16
193	 13	164.0	24.1	 16
194	 13	86.8	13.2	 16
195	 13	327.3	28.4	 16
196	 13	136.8	20.0	 16
197	 13	124.0	20.8	 16
198	 13	475.5	48.4	 16
199	 13	99.5	19.3	 16
200	 13	1029.3	66.6	 16
201	 13	56.3	13.2	 16
202	 13	322.0	20.9	 16
203	 13	241.0	35.3	 16
204	 13	73.3	14.3	 16
205	 13	58.3	13.2	 16
206	 13	154.5	15.3	 16
207	 13	69.3	12.2	 16
208	 13	137.8	27.8	 16
209	 13	57.3	10.1	 16
210	 13	128.0	23.5	 16
211	 13	295.5	37.5	 16
212	 13	4189.5	267.4	 16
213	 13	199.0	28.5	 16
214	 13	70.8	15.6	 16
215	 13	184.8	31.2	 16
216	 13	70.8	9.7	 16
217	 13	73.3	11.9	 16
218	 13	67.3	13.9	 16
219	 13	69.3	11.8	 16
220	 13	176.5	21.0	 16
221	 13	235.0	29.9	 16
222	 13	256.0	25.7	 16
223	 13	327.8	43.6	 16
224	 13	83.0	18.4	 16
225	 13	87.3	15.0	 16
226	 13	81.8	18.0	 16
227	 13	120.0	23.0	 16
228	 13	142.5	18.0	 16
229	 13	80.0	11.5	 16
230	 13	72.5	16.9	 16
231	 13	339.8	46.9	 16
232	 13	392.5	39.0	 16
233	 13	284.5	36.9	 16
234	 13	88.8	15.1	 16
235	 13	1595.0	183.0	 16
236	 13	262.0	23.3	 16
237	 13	2476.3	179.7	 16
238	 13	2687.0	145.4	 16
239	 13	922.5	68.3	 16
240	 13	408.5	40.8	 16
241	 13	5625.8	534.0	 16
242	 13	6325.8	286.0	 16
243	 13	429.3	39.5	 16
244	 13	507.0	55.1	 16
245	 13	64.5	11.9	 16
246	 13	168.0	22.4	 16
247	 13	213.0	24.2	 16
248	 13	205.5	31.5	 16
249	 13	127.5	20.9	 16
250	 13	70.8	12.6	 16
251	 13	137.0	25.3	 16
252	 13	70.0	13.5	 16
253	 13	70.8	17.6	 16
254	 13	76.3	9.7	 16
255	 13	106.3	14.9	 16
256	 13	1091.3	109.7	 16
257	 13	76.3	11.1	 16
258	 13	102.8	19.1	 16
259	 13	103.5	18.5	 16
260	 13	63.3	10.0	 16
261	 13	324.8	42.9	 16
262	 13	114.3	18.2	 16
263	 13	592.0	56.1	 16
264	 13	68.8	11.2	 16
265	 13	125.0	16.4	 16
266	 13	437.8	69.0	 16
267	 13	313.5	48.2	 16
268	 13	102.5	12.0	 16
269	 13	464.3	63.0	 16
270	 13	596.5	83.0	 16
271	 13	110.8	24.2	 16
272	 13	128.0	18.7	 20
273	 13	85.3	15.9	 16
274	 13	92.0	14.8	 16
275	 13	104.3	26.9	 16
276	 13	3952.3	713.5	 16
277	 13	186.5	26.3	 16
278	 13	198.5	34.8	 16
279	 13	132.0	17.0	 16
280	 13	94.3	22.5	 16
281	 13	70.3	15.1	 16
282	 13	93.0	12.9	 16
283	 13	151.0	24.4	 16
284	 13	58.8	11.7	 16
285	 13	91.0	14.3	 16
286	 13	1568.8	210.9	 16
287	 13	622.5	96.0	 16
288	 13	187.5	29.6	 16
289	 13	108.5	19.1	 16
290	 13	559.3	98.4	 16
291	 13	118.0	20.4	 16
292	 13	391.3	42.7	 16
293	 13	100.0	14.2	 16
294	 13	304.8	50.5	 16
295	 13	258.0	28.7	 16
296	 13	167.0	24.3	 16
297	 13	289.5	38.5	 16
298	 13	331.8	36.1	 16
299	 13	265.5	27.2	 16
300	 13	302.3	36.0	 16
301	 13	196.8	29.7	 16
302	 13	497.0	56.6	 16
303	 13	530.5	55.4	 16
304	 13	1074.0	123.5	 16
305	 13	510.5	65.1	 16
306	 13	1227.8	137.1	 16
307	 13	125.5	22.2	 16
308	 13	96.3	14.6	 16
309	 13	499.5	50.3	 16
310	 13	719.3	72.9	 16
311	 13	129.5	17.4	 16
312	 13	155.8	25.6	 16
313	 13	128.3	19.8	 16
314	 13	193.3	21.2	 16
315	 13	80.3	9.8	 16
316	 13	121.8	19.6	 16
317	 13	125.5	17.2	 16
318	 13	60.0	14.2	 16
319	 13	68.3	4.8	 16
320	 13	156.0	41.2	 16
321	 13	118.8	16.2	 16
322	 13	154.3	28.5	 16
323	 13	2967.3	224.9	 16
324	 13	111.0	14.5	 16
325	 13	297.0	43.5	 16
326	 13	454.3	45.1	 16
327	 13	139.5	22.6	 16
328	 13	89.5	17.0	 16
329	 13	975.3	86.6	 16
330	 13	1097.0	68.0	 16
331	 13	1068.0	112.3	 16
332	 13	384.5	29.9	 16
333	 13	334.3	34.8	 16
334	 13	77.0	11.2	 16
335	 13	68.5	14.1	 16
336	 13	74.8	10.1	 16
337	 13	82.8	18.5	 16
338	 13	389.5	61.7	 16
339	 13	232.0	38.0	 16
340	 13	517.5	67.9	 16
341	 13	4645.3	592.1	 16
342	 13	188.0	31.3	 16
343	 13	71.5	13.1	 16
344	 13	63.3	10.8	 16
345	 13	340.0	37.8	 16
346	 13	640.3	77.6	 16
347	 13	86.8	14.8	 16
348	 13	295.5	30.1	 16
349	 13	1597.8	162.2	 16
350	 13	4392.0	285.9	 16
351	 13	563.0	68.3	 16
352	 13	352.3	59.5	 16
353	 13	2826.0	267.2	 16
354	 13	752.5	52.8	 16
355	 13	372.3	40.5	 16
356	 13	255.3	35.8	 16
357	 13	209.3	28.4	 16
358	 13	82.8	12.0	 16
359	 13	77.0	16.4	 16
360	 13	92.3	16.5	 16
361	 13	435.3	35.6	 16
362	 13	131.3	14.2	 16
363	 13	99.8	16.7	 16
364	 13	84.5	14.4	 16
365	 13	68.3	16.0	 16
366	 13	89.8	17.9	 16
367	 13	723.0	99.1	 16
368	 13	78.5	13.6	 16
369	 13	140.3	23.4	 16
370	 13	403.5	37.2	 16
371	 13	686.0	50.1	 16
372	 13	405.0	39.0	 16
373	 13	135.5	22.5	 16
374	 13	58.3	12.5	 16
375	 13	156.3	16.4	 16
376	 13	133.0	23.2	 16
377	 13	256.3	26.5	 16
378	 13	86.0	23.1	 16
379	 13	503.5	43.9	 16
380	 13	528.8	47.8	 16
381	 13	70.8	14.5	 16
382	 13	78.5	17.4	 16
383	 13	126.3	29.4	 16
384	 13	737.0	72.7	 16
385	 13	91.0	14.0	 16
386	 13	142.0	25.6	 16
387	 13	82.0	14.2	 16
388	 13	133.3	32.8	 16
389	 13	85.0	14.2	 16
390	 13	233.3	32.2	 16
391	 13	273.8	31.9	 16
392	 13	72.8	12.8	 16
393	 13	58.5	9.6	 16
394	 13	511.8	68.6	 16
395	 13	89.0	15.5	 16
396	 13	352.3	43.0	 16
397	 13	230.0	23.8	 16
398	 13	128.8	26.3	 16
399	 13	83.0	13.2	 16
400	 13	991.3	135.7	 16
401	 13	838.5	112.9	 16
402	 13	133.0	24.1	 16
403	 13	80.8	13.3	 16
404	 13	116.0	16.1	 16
405	 13	67.3	11.5	 16
406	 13	326.3	40.9	 16
407	 13	218.8	33.2	 16
408	 13	118.0	19.6	 16
409	 13	101.5	20.0	 16
410	 13	739.0	158.8	 16
411	 13	129.3	19.0	 16
412	 13	86.5	15.7	 16
413	 13	597.5	72.4	 16
414	 13	869.8	90.7	 16
415	 13	238.5	33.5	 20
416	 13	334.5	59.0	 16
417	 13	223.0	28.7	 16
418	 13	212.3	32.8	 16
419	 13	168.8	25.9	 16
420	 13	83.0	11.6	 16
421	 13	67.5	10.7	 16
422	 13	192.5	28.0	 16
423	 13	87.3	15.1	 16
424	 13	164.3	24.3	 16
425	 13	108.3	23.2	 16
426	 13	73.5	14.2	 16
427	 13	1244.5	227.0	 16
428	 13	160.0	20.9	 16
429	 13	445.0	55.8	 16
430	 13	224.0	30.2	 16
431	 13	474.0	87.7	 16
432	 13	1738.0	311.0	 16
433	 13	2295.8	377.7	 16
434	 13	2067.8	370.5	 16
435	 13	211.8	31.0	 16
436	 13	146.3	23.7	 16
437	 13	629.8	109.0	 16
438	 13	176.3	21.0	 16
439	 13	3525.8	661.7	 16
440	 13	135.5	19.2	 16
441	 13	385.0	59.7	 16
442	 13	151.3	31.4	 16
443	 13	90.0	14.3	 16
444	 13	213.5	42.0	 16
445	 13	78.3	16.2	 16
446	 13	183.5	22.3	 16
447	 13	104.5	19.6	 16
448	 13	136.0	19.8	 16
449	 13	63.0	12.9	 16
450	 13	61.5	9.0	 16
451	 13	68.8	13.7	 16
452	 13	58.3	13.1	 16
453	 13	159.5	29.2	 16
454	 13	109.0	20.3	 16
455	 13	1030.0	200.5	 16
456	 13	67.3	11.7	 16
457	 13	267.3	41.4	 16
458	 13	127.5	17.7	 16
459	 13	100.5	14.0	 16
460	 13	105.5	19.4	 16
461	 13	198.0	19.5	 16
462	 13	1605.5	164.7	 16
463	 13	275.3	29.0	 16
464	 13	85.8	15.6	 16
465	 13	313.8	24.0	 16
466	 13	371.8	41.0	 16
467	 13	747.0	73.8	 16
468	 13	69.5	13.0	 16
469	 13	349.5	48.3	 16
470	 13	143.3	19.9	 16
471	 13	741.3	105.5	 16
472	 13	92.3	18.5	 16
473	 13	411.8	48.7	 16
474	 13	251.3	41.6	 16
475	 13	77.0	13.1	 16
476	 13	98.0	17.5	 16
477	 13	198.5	34.0	 16
478	 13	67.8	12.3	 16
479	 13	87.5	17.5	 16
480	 13	16558.8	1182.2	 16
481	 13	1297.3	114.0	 16
482	 13	453.5	42.4	 16
483	 13	74.3	14.7	 16
484	 13	70.0	12.0	 16
485	 13	869.3	86.3	 16
486	 13	1031.8	79.1	 16
487	 13	1154.3	57.8	 16
488	 13	280.5	33.1	 16
489	 13	67.8	15.9	 16
490	 13	126.3	17.4	 16
491	 13	69.5	13.3	 16
492	 13	67.8	17.0	 16
493	 13	93.5	19.3	 16
494	 13	75.3	15.2	 16
495	 13	125.3	15.0	 16
496	 13	107.8	22.5	 16
497	 13	455.8	70.8	 16
498	 13	83.3	16.8	 16
499	 13	247.3	33.4	 16
500	 13	417.8	70.6	 16
501	 13	124.0	23.4	 16
502	 13	279.3	36.6	 16
503	 13	70.5	13.1	 16
504	 13	226.0	41.6	 16
505	 13	83.0	14.5	 16
506	 13	337.8	43.5	 16
507	 13	252.5	44.5	 16
508	 13	3124.8	292.7	 16
509	 13	937.0	93.7	 16
510	 13	196.8	38.7	 16
511	 13	214.8	23.6	 16
512	 13	105.0	19.6	 16
513	 13	220.0	27.6	 16
514	 13	420.8	61.9	 16
515	 13	1042.3	116.6	 16
516	 13	216.5	34.4	 16
517	 13	202.0	36.5	 16
518	 13	79.0	16.6	 16
519	 13	256.5	40.2	 16
520	 13	103.0	18.7	 16
521	 13	104.3	21.2	 16
522	 13	168.0	26.1	 16
523	 13	203.5	31.5	 16
524	 13	234.0	37.6	 16
525	 13	61.5	11.8	 16
526	 13	86.3	10.9	 16
527	 13	186.8	22.1	 16
528	 13	320.5	40.3	 16
529	 13	231.3	24.8	 16
530	 13	296.5	35.0	 16
531	 13	93.8	15.9	 16
532	 13	224.3	36.4	 16
533	 13	84.5	12.8	 16
534	 13	84.3	17.2	 16
535	 13	993.8	104.7	 16
536	 13	84.8	16.2	 16
537	 13	138.5	22.8	 16
538	 13	193.0	33.9	 16
539	 13	175.0	40.8	 16
540	 13	140.8	25.3	 16
541	 13	210.0	14.5	 16
542	 13	58.8	7.9	 16
543	 13	187.8	33.9	 16
544	 13	57.3	10.8	 16
545	 13	279.0	48.8	 16
546	 13	716.5	99.5	 16
547	 13	1420.0	154.7	 16
548	 13	926.0	78.3	 16
549	 13	325.0	38.5	 16
550	 13	85.0	14.9	 16
551	 13	173.0	26.9	 16
552	 13	80.0	12.8	 16
553	 13	6091.5	890.3	 16
554	 13	84.3	16.9	 16
555	 13	65.3	12.7	 16
556	 13	1727.0	317.7	 16
557	 13	79.3	11.7	 20
558	 13	71.0	13.5	 16
559	 13	137.8	18.9	 16
560	 13	108.0	22.0	 16
561	 13	87.3	11.9	 16
562	 13	496.0	88.6	 16
563	 13	1676.5	261.1	 16
564	 13	127.3	14.7	 16
565	 13	112.0	16.0	 16
566	 13	551.0	67.5	 16
567	 13	682.8	71.1	 16
568	 13	315.3	55.9	 16
569	 13	198.0	34.2	 16
570	 13	135.8	28.6	 16
571	 13	63.3	10.0	 16
572	 13	307.3	58.0	 16
573	 13	385.8	46.0	 16
574	 13	134.8	19.4	 16
575	 13	243.3	32.7	 16
576	 13	222.3	37.0	 16
577	 13	137.5	19.2	 16
578	 13	418.5	49.4	 16
579	 13	1219.0	145.4	 16
580	 13	322.8	38.1	 16
581	 13	235.3	29.7	 16
582	 13	164.8	23.6	 16
583	 13	188.8	31.4	 16
584	 13	891.0	113.8	 16
585	 13	146.3	23.9	 16
586	 13	130.5	20.8	 16
587	 13	465.8	64.4	 16
588	 13	54.5	7.3	 16
589	 13	122.3	16.7	 16
590	 13	100.5	17.1	 16
591	 13	562.8	52.1	 16
592	 13	1938.8	204.9	 16
593	 13	164.5	30.5	 16
594	 13	480.8	62.1	 16
595	 13	1191.5	120.2	 16
596	 13	90.5	19.5	 16
597	 13	3873.5	261.8	 16
598	 13	482.0	45.7	 16
599	 13	222.5	37.2	 16
600	 13	133.3	24.0	 16
601	 13	129.5	19.2	 16
602	 13	315.8	48.0	 16
603	 13	82.0	12.3	 16
604	 13	158.0	18.4	 16
605	 13	289.3	36.1	 16
606	 13	302.3	33.7	 16
607	 13	139.5	19.0	 16
608	 13	187.5	24.9	 16
609	 13	171.3	21.9	 16
610	 13	63.5	12.3	 16
611	 13	67.5	10.4	 16
612	 13	88.8	13.9	 16
613	 13	153.3	31.3	 16
614	 13	313.0	58.9	 16
615	 13	386.3	53.9	 16
616	 13	409.0	50.7	 16
617	 13	151.3	20.1	 16
618	 13	482.0	53.0	 16
619	 13	333.3	24.2	 16
620	 13	85.0	13.0	 16
621	 13	75.0	11.6	 16
622	 13	185.5	18.7	 16
623	 13	570.8	51.8	 16
624	 13	171.3	31.9	 16
625	 13	157.5	23.2	 16
626	 13	81.5	13.5	 16
627	 13	78.8	13.6	 16
628	 13	108.0	14.4	 16
629	 13	106.0	28.6	 16
630	 13	3900.8	1101.8	 16
631	 13	4091.3	375.9	 16
632	 13	250.5	60.0	 16
633	 13	365.8	39.6	 16
634	 13	1198.5	92.5	 16
635	 13	908.0	121.1	 16
636	 13	1549.3	212.0	 16
637	 13	58.0	10.3	 16
638	 13	527.5	97.9	 16
639	 13	137.5	21.8	 16
640	 13	241.3	37.8	 16
641	 13	214.3	35.0	 16
642	 13	142.5	22.2	 16
643	 13	110.5	16.7	 16
644	 13	99.3	16.7	 16
645	 13	290.5	37.7	 16
646	 13	146.3	19.6	 16
647	 13	400.3	61.5	 16
648	 13	79.3	17.2	 16
649	 13	87.5	13.2	 16
650	 13	186.3	29.1	 16
651	 13	84.0	11.3	 16
652	 13	298.8	23.0	 16
653	 13	79.5	10.7	 16
654	 13	71.3	14.4	 16
655	 13	70.3	11.6	 16
656	 13	71.3	15.8	 16
657	 13	63.3	11.6	 16
658	 13	543.0	47.1	 16
659	 13	1433.0	204.7	 16
660	 13	2395.8	217.2	 16
661	 13	263.8	21.5	 16
662	 13	200.5	31.4	 16
663	 13	631.8	46.4	 16
664	 13	3516.0	2312.4	 16
665	 13	210.8	25.3	 16
666	 13	2791.5	270.1	 16
667	 13	69.5	11.8	 16
668	 13	900.8	112.0	 16
669	 13	56.0	9.1	 16
670	 13	160.8	24.3	 16
671	 13	83.5	12.3	 16
672	 13	102.0	15.9	 16
673	 13	111.3	15.3	 16
674	 13	70.0	11.1	 16
675	 13	62.5	9.3	 16
676	 13	127.5	16.9	 16
677	 13	364.0	51.6	 16
678	 13	80.3	12.9	 16
679	 13	92.0	16.0	 16
680	 13	1742.0	232.5	 16
681	 13	116.5	15.4	 16
682	 13	148.3	20.1	 16
683	 13	110.5	16.3	 16
684	 13	374.8	56.5	 16
685	 13	299.0	54.8	 16
686	 13	74.5	9.5	 16
687	 13	80.3	16.3	 16
688	 13	101.5	18.8	 16
689	 13	1745.8	207.1	 16
690	 13	134.5	17.6	 16
691	 13	386.3	42.9	 16
692	 13	336.5	32.4	 16
693	 13	374.0	28.7	 16
694	 13	96.0	18.5	 16
695	 13	181.3	20.2	 16
696	 13	432.0	84.3	 16
697	 13	134.3	25.1	 16
698	 13	4005.3	590.6	 16
699	 13	337.0	44.7	 16
700	 13	178.3	25.9	 20
701	 13	348.5	41.7	 16
702	 13	1785.5	195.2	 16
703	 13	523.8	59.7	 16
704	 13	144.0	18.0	 16
705	 13	149.3	25.7	 16
706	 13	120.3	19.8	 16
707	 13	1627.8	151.3	 16
708	 13	214.5	33.0	 16
709	 13	263.3	25.6	 16
710	 13	1748.8	128.6	 16
711	 13	125.5	18.5	 16
  0	 14	10343.3	1111.3	 16
  1	 14	252.8	19.1	 16
  2	 14	113.0	18.4	 16
  3	 14	116.3	20.5	 16
  4	 14	141.3	32.7	 16
  5	 14	117.0	18.5	 16
  6	 14	83.0	12.9	 16
  7	 14	85.0	15.1	 16
  8	 14	312.3	42.3	 16
  9	 14	167.3	23.1	 16
 10	 14	107.8	17.6	 16
 11	 14	93.8	11.8	 16
 12	 14	95.8	19.1	 16
 13	 14	93.3	18.6	 16
 14	 14	86.5	16.1	 16
 15	 14	284.3	36.6	 16
 16	 14	367.0	47.0	 16
 17	 14	128.3	21.1	 16
 18	 14	97.3	18.1	 16
 19	 14	87.0	14.4	 16
 20	 14	133.3	19.4	 16
 21	 14	107.3	16.0	 16
 22	 14	78.3	11.9	 16
 23	 14	78.8	13.3	 16
 24	 14	80.5	11.3	 16
 25	 14	84.8	14.5	 16
 26	 14	80.0	13.8	 16
 27	 14	133.8	28.5	 16
 28	 14	84.0	12.2	 16
 29	 14	77.3	16.8	 16
 30	 14	69.3	15.3	 16
 31	 14	197.5	39.7	 16
 32	 14	87.5	20.4	 16
 33	 14	84.5	14.1	 16
 34	 14	77.3	10.4	 16
 35	 14	104.3	16.9	 16
 36	 14	91.0	13.6	 16
 37	 14	136.3	17.7	 16
 38	 14	103.3	16.9	 16
 39	 14	138.0	24.0	 16
 40	 14	85.8	12.4	 16
 41	 14	271.3	52.9	 16
 42	 14	78.0	11.8	 16
 43	 14	81.8	13.7	 16
 44	 14	73.5	13.5	 16
 45	 14	263.3	40.1	 16
 46	 14	213.3	31.8	 16
 47	 14	2394.0	215.1	 16
 48	 14	245.5	29.6	 16
 49	 14	84.3	17.8	 16
 50	 14	79.8	14.5	 16
 51	 14	753.5	104.8	 16
 52	 14	79.3	13.1	 16
 53	 14	63.8	8.4	 16
 54	 14	79.8	15.4	 16
 55	 14	75.3	12.6	 16
 56	 14	70.3	10.8	 16
 57	 14	79.3	14.0	 16
 58	 14	66.5	11.3	 16
 59	 14	90.3	20.3	 16
 60	 14	80.0	11.0	 16
 61	 14	81.0	10.6	 16
 62	 14	162.8	19.6	 16
 63	 14	145.5	21.6	 16
 64	 14	361.0	56.5	 16
 65	 14	78.3	11.9	 16
 66	 14	89.0	17.7	 16
 67	 14	99.0	19.1	 16
 68	 14	85.5	12.6	 16
 69	 14	71.3	15.1	 16
 70	 14	67.0	9.1	 16
 71	 14	106.3	17.6	 16
 72	 14	69.3	11.2	 16
 73	 14	58.3	17.4	 16
 74	 14	75.0	12.8	 16
 75	 14	60.3	10.8	 16
 76	 14	89.0	17.7	 16
 77	 14	419.0	76.2	 16
 78	 14	66.5	7.0	 16
 79	 14	63.8	12.7	 16
 80	 14	131.0	19.2	 16
 81	 14	89.0	14.2	 16
 82	 14	89.0	12.8	 16
 83	 14	69.0	13.3	 16
 84	 14	63.5	13.6	 16
 85	 14	71.3	14.3	 16
 86	 14	162.0	26.6	 16
 87	 14	77.3	12.9	 16
 88	 14	407.8	29.8	 16
 89	 14	781.5	64.3	 16
 90	 14	107.3	17.6	 16
 91	 14	382.3	37.5	 16
 92	 14	81.0	16.0	 16
 93	 14	97.0	17.3	 16
 94	 14	187.0	22.0	 16
 95	 14	97.8	18.5	 16
 96	 14	67.3	13.6	 16
 97	 14	62.5	11.1	 16
 98	 14	64.5	13.2	 16
 99	 14	67.0	9.9	 16
100	 14	76.5	14.2	 16
101	 14	290.8	42.2	 16
102	 14	82.3	14.7	 16
103	 14	110.3	19.9	 16
104	 14	77.8	16.4	 16
105	 14	67.5	10.9	 16
106	 14	109.3	14.4	 16
107	 14	71.8	11.1	 16
108	 14	70.3	14.1	 16
109	 14	60.5	8.5	 16
110	 14	82.5	16.6	 16
111	 14	90.3	13.6	 16
112	 14	191.3	32.6	 16
113	 14	88.5	17.7	 16
114	 14	86.3	12.1	 16
115	 14	81.5	15.6	 16
116	 14	114.5	18.4	 16
117	 14	111.3	21.7	 16
118	 14	112.8	33.2	 16
119	 14	131.8	16.3	 16
120	 14	592.0	64.9	 16
121	 14	98.3	15.9	 16
122	 14	60.3	12.3	 16
123	 14	74.5	11.5	 16
124	 14	100.8	20.0	 16
125	 14	146.0	21.9	 16
126	 14	203.5	36.1	 16
127	 14	101.0	23.0	 16
128	 14	78.3	12.3	 16
129	 14	257.5	26.3	 16
130	 14	85.8	20.4	 16
131	 14	97.8	21.0	 16
132	 14	86.5	14.8	 16
133	 14	134.3	16.4	 16
134	 14	571.5	116.9	 20
135	 14	97.5	13.5	 16
136	 14	90.5	18.2	 16
137	 14	64.3	13.2	 16
138	 14	570.0	101.1	 16
139	 14	94.3	18.5	 16
140	 14	74.5	16.1	 16
141	 14	77.3	12.8	 16
142	 14	67.5	12.0	 16
143	 14	105.0	76.6	 16
144	 14	110.0	22.2	 16
145	 14	318.0	35.2	 16
146	 14	795.3	188.5	 16
147	 14	79.8	15.5	 16
148	 14	213.3	39.9	 16
149	 14	100.0	14.3	 16
150	 14	115.5	19.4	 16
151	 14	74.5	19.3	 16
152	 14	69.3	12.1	 16
153	 14	2552.0	402.1	 16
154	 14	112.0	19.7	 16
155	 14	81.8	14.2	 16
156	 14	111.3	20.2	 16
157	 14	123.8	27.6	 16
158	 14	306.5	37.7	 16
159	 14	131.3	22.7	 16
160	 14	66.3	10.1	 16
161	 14	91.3	19.4	 16
162	 14	62.8	14.8	 16
163	 14	66.0	13.9	 16
164	 14	95.5	19.0	 16
165	 14	69.3	11.6	 16
166	 14	65.5	9.0	 16
167	 14	86.0	17.0	 16
168	 14	84.8	18.3	 16
169	 14	63.5	13.8	 16
170	 14	66.0	14.6	 16
171	 14	56.5	9.9	 16
172	 14	84.3	16.7	 16
173	 14	64.8	12.7	 16
174	 14	72.0	10.3	 16
175	 14	77.0	12.4	 16
176	 14	86.5	13.6	 16
177	 14	99.3	16.7	 16
178	 14	109.3	16.2	 16
179	 14	73.3	13.4	 16
180	 14	264.0	41.1	 16
181	 14	156.0	21.4	 16
182	 14	399.0	45.0	 16
183	 14	73.3	12.8	 16
184	 14	104.0	20.5	 16
185	 14	62.8	11.3	 16
186	 14	491.5	42.0	 16
187	 14	113.8	21.7	 16
188	 14	112.5	20.5	 16
189	 14	180.5	13.7	 16
190	 14	132.0	21.7	 16
191	 14	117.5	19.8	 16
192	 14	84.0	14.7	 16
193	 14	89.3	16.4	 16
194	 14	104.3	17.3	 16
195	 14	107.0	20.7	 16
196	 14	205.3	23.6	 16
197	 14	77.0	15.7	 16
198	 14	121.3	20.6	 16
199	 14	109.3	19.6	 16
200	 14	234.8	40.2	 16
201	 14	59.5	13.4	 16
202	 14	82.3	13.6	 16
203	 14	96.0	15.7	 16
204	 14	73.3	14.3	 16
205	 14	55.3	9.5	 16
206	 14	87.3	21.5	 16
207	 14	58.8	10.0	 16
208	 14	57.5	11.5	 16
209	 14	64.3	12.7	 16
210	 14	90.3	11.7	 16
211	 14	87.5	22.0	 16
212	 14	939.3	180.3	 16
213	 14	91.0	19.6	 16
214	 14	69.5	13.0	 16
215	 14	75.5	20.2	 16
216	 14	82.8	18.8	 16
217	 14	58.3	7.9	 16
218	 14	61.3	11.0	 16
219	 14	66.5	15.0	 16
220	 14	119.8	23.5	 16
221	 14	108.0	14.0	 16
222	 14	122.5	19.7	 16
223	 14	413.0	32.0	 16
224	 14	90.0	17.3	 16
225	 14	86.8	11.5	 16
226	 14	87.3	13.0	 16
227	 14	80.0	15.7	 16
228	 14	111.3	14.8	 16
229	 14	110.5	20.1	 16
230	 14	61.0	6.4	 16
231	 14	205.0	27.0	 16
232	 14	199.5	26.5	 16
233	 14	362.5	33.2	 16
234	 14	182.5	33.0	 16
235	 14	732.3	96.3	 16
236	 14	236.3	20.7	 16
237	 14	6245.3	429.1	 16
238	 14	6744.8	428.2	 16
239	 14	824.0	75.3	 16
240	 14	138.3	21.2	 16
241	 14	1071.3	146.6	 16
242	 14	1316.3	161.6	 16
243	 14	139.8	18.5	 16
244	 14	102.0	18.9	 16
245	 14	63.0	8.9	 16
246	 14	107.8	13.8	 16
247	 14	77.8	11.8	 16
248	 14	65.5	14.6	 16
249	 14	85.5	14.4	 16
250	 14	66.5	15.1	 16
251	 14	69.0	12.1	 16
252	 14	66.0	14.3	 16
253	 14	58.5	8.7	 16
254	 14	82.8	14.1	 16
255	 14	82.5	13.1	 16
256	 14	243.5	45.2	 16
257	 14	103.0	15.8	 16
258	 14	75.5	12.9	 16
259	 14	72.8	16.3	 16
260	 14	64.0	9.2	 16
261	 14	57.3	7.2	 16
262	 14	70.0	11.9	 16
263	 14	186.0	24.4	 16
264	 14	66.3	11.7	 16
265	 14	117.5	20.3	 16
266	 14	87.8	11.5	 16
267	 14	425.8	55.2	 16
268	 14	94.8	19.1	 16
269	 14	285.0	43.0	 16
270	 14	163.3	41.3	 16
271	 14	73.3	11.6	 16
272	 14	109.0	12.4	 16
273	 14	80.3	18.6	 16
274	 14	61.8	10.7	 16
275	 14	75.5	13.4	 16
276	 14	232.0	49.3	 16
277	 14	74.5	14.8	 20
278	 14	86.5	15.0	 16
279	 14	70.3	14.5	 16
280	 14	62.3	10.8	 16
281	 14	68.3	13.2	 16
282	 14	136.3	21.9	 16
283	 14	182.5	29.8	 16
284	 14	64.0	11.6	 16
285	 14	86.3	16.9	 16
286	 14	462.8	65.8	 16
287	 14	92.3	11.5	 16
288	 14	80.5	17.7	 16
289	 14	136.5	36.0	 16
290	 14	69.5	8.9	 16
291	 14	61.0	15.3	 16
292	 14	94.5	18.8	 16
293	 14	81.3	12.0	 16
294	 14	126.3	18.5	 16
295	 14	179.0	18.3	 16
296	 14	188.3	23.7	 16
297	 14	76.5	19.8	 16
298	 14	90.8	15.3	 16
299	 14	175.5	31.1	 16
300	 14	156.8	28.9	 16
301	 14	182.3	31.8	 16
302	 14	96.5	21.0	 16
303	 14	116.0	23.4	 16
304	 14	211.5	39.2	 16
305	 14	101.3	16.3	 16
306	 14	197.3	34.3	 16
307	 14	118.8	16.7	 16
308	 14	68.3	14.7	 16
309	 14	186.0	26.1	 16
310	 14	215.0	22.5	 16
311	 14	109.3	21.7	 16
312	 14	71.3	16.8	 16
313	 14	92.3	18.6	 16
314	 14	84.3	16.2	 16
315	 14	66.3	9.0	 16
316	 14	89.5	13.5	 16
317	 14	104.5	19.2	 16
318	 14	60.5	11.7	 16
319	 14	73.0	15.5	 16
320	 14	110.3	22.8	 16
321	 14	110.8	17.3	 16
322	 14	141.0	14.0	 16
323	 14	420.3	41.5	 16
324	 14	122.3	21.2	 16
325	 14	764.0	83.4	 16
326	 14	117.5	19.1	 16
327	 14	86.3	14.5	 16
328	 14	74.8	13.6	 16
329	 14	104.3	17.5	 16
330	 14	118.8	20.9	 16
331	 14	298.0	47.2	 16
332	 14	138.3	29.5	 16
333	 14	127.3	19.7	 16
334	 14	66.5	9.8	 16
335	 14	74.3	12.4	 16
336	 14	78.0	15.1	 16
337	 14	82.3	12.5	 16
338	 14	114.0	15.4	 16
339	 14	511.5	58.7	 16
340	 14	263.8	31.7	 16
341	 14	267.8	39.7	 16
342	 14	86.5	16.7	 16
343	 14	73.0	12.2	 16
344	 14	69.3	12.8	 16
345	 14	74.5	11.9	 16
346	 14	112.5	30.2	 16
347	 14	64.5	10.5	 16
348	 14	85.3	21.6	 16
349	 14	145.8	24.8	 16
350	 14	471.3	73.2	 16
351	 14	194.3	24.5	 16
352	 14	83.0	10.6	 16
353	 14	301.3	47.4	 16
354	 14	93.3	17.3	 16
355	 14	170.5	20.2	 16
356	 14	385.8	53.9	 16
357	 14	363.8	36.4	 16
358	 14	119.8	23.0	 16
359	 14	58.5	12.7	 16
360	 14	67.5	15.9	 16
361	 14	210.3	26.1	 16
362	 14	116.8	15.7	 16
363	 14	64.0	12.4	 16
364	 14	73.3	10.6	 16
365	 14	68.3	10.7	 16
366	 14	91.0	18.2	 16
367	 14	206.0	33.6	 16
368	 14	69.5	13.6	 16
369	 14	69.5	13.3	 16
370	 14	173.8	34.8	 16
371	 14	250.3	47.6	 16
372	 14	417.5	68.1	 16
373	 14	174.0	24.5	 16
374	 14	69.3	12.9	 16
375	 14	90.5	14.6	 16
376	 14	78.5	20.0	 16
377	 14	328.5	43.2	 16
378	 14	88.8	12.9	 16
379	 14	161.0	19.7	 16
380	 14	176.0	60.9	 16
381	 14	71.5	10.6	 16
382	 14	101.5	15.9	 16
383	 14	106.0	17.0	 16
384	 14	173.3	20.5	 16
385	 14	80.3	13.6	 16
386	 14	72.3	11.8	 16
387	 14	88.3	16.5	 16
388	 14	112.0	32.2	 16
389	 14	98.0	17.8	 16
390	 14	91.8	18.1	 16
391	 14	85.5	13.9	 16
392	 14	68.3	15.5	 16
393	 14	68.0	12.0	 16
394	 14	391.0	51.9	 16
395	 14	97.3	14.5	 16
396	 14	170.3	25.1	 16
397	 14	324.0	28.9	 16
398	 14	113.3	27.6	 16
399	 14	95.8	12.5	 16
400	 14	107.5	17.9	 16
401	 14	173.3	26.0	 16
402	 14	90.5	12.5	 16
403	 14	65.0	8.6	 16
404	 14	99.8	17.1	 16
405	 14	66.0	10.3	 16
406	 14	303.0	44.6	 16
407	 14	245.8	27.9	 16
408	 14	82.5	17.2	 16
409	 14	75.5	15.1	 16
410	 14	72.0	10.9	 16
411	 14	78.5	9.0	 16
412	 14	83.0	15.2	 16
413	 14	88.5	18.7	 16
414	 14	98.8	16.5	 16
415	 14	116.3	24.0	 16
416	 14	68.3	9.7	 16
417	 14	70.0	16.2	 16
418	 14	154.8	17.8	 16
419	 14	89.8	20.9	 20
420	 14	71.5	13.8	 16
421	 14	69.5	16.6	 16
422	 14	78.3	10.8	 16
423	 14	73.3	12.5	 16
424	 14	96.8	39.0	 16
425	 14	93.0	15.6	 16
426	 14	71.5	15.1	 16
427	 14	120.3	29.8	 16
428	 14	125.8	18.4	 16
429	 14	151.8	26.4	 16
430	 14	75.0	13.4	 16
431	 14	171.5	16.9	 16
432	 14	237.5	49.0	 16
433	 14	373.3	46.0	 16
434	 14	256.3	38.6	 16
435	 14	90.5	14.9	 16
436	 14	70.5	10.2	 16
437	 14	147.5	21.6	 16
438	 14	274.5	43.3	 16
439	 14	128.0	23.0	 16
440	 14	72.8	10.8	 16
441	 14	90.8	14.8	 16
442	 14	114.3	16.3	 16
443	 14	71.3	10.9	 16
444	 14	94.0	14.8	 16
445	 14	68.0	8.8	 16
446	 14	90.5	18.8	 16
447	 14	66.8	16.1	 16
448	 14	57.5	8.5	 16
449	 14	54.3	6.1	 16
450	 14	67.0	18.0	 16
451	 14	64.8	11.7	 16
452	 14	69.0	12.6	 16
453	 14	63.3	9.1	 16
454	 14	92.3	18.2	 16
455	 14	87.5	22.7	 16
456	 14	64.0	7.0	 16
457	 14	63.8	12.2	 16
458	 14	104.3	17.4	 16
459	 14	82.3	15.6	 16
460	 14	93.5	16.8	 16
461	 14	74.8	11.9	 16
462	 14	175.3	31.9	 16
463	 14	73.5	16.0	 16
464	 14	72.0	14.6	 16
465	 14	101.3	14.8	 16
466	 14	75.5	11.4	 16
467	 14	101.8	21.9	 16
468	 14	62.3	9.9	 16
469	 14	65.3	14.9	 16
470	 14	187.8	23.1	 16
471	 14	182.0	22.8	 16
472	 14	69.5	11.0	 16
473	 14	108.8	16.3	 16
474	 14	103.5	18.4	 16
475	 14	74.3	9.5	 16
476	 14	82.0	12.7	 16
477	 14	68.0	15.2	 16
478	 14	55.3	9.4	 16
479	 14	66.3	10.0	 16
480	 14	7090.3	1651.4	 16
481	 14	279.8	71.5	 16
482	 14	65.8	14.6	 16
483	 14	67.0	10.3	 16
484	 14	60.0	12.7	 16
485	 14	202.3	34.8	 16
486	 14	231.0	45.6	 16
487	 14	267.8	45.3	 16
488	 14	115.8	17.9	 16
489	 14	71.0	11.6	 16
490	 14	73.8	12.8	 16
491	 14	75.8	21.4	 16
492	 14	73.0	16.3	 16
493	 14	66.5	7.8	 16
494	 14	71.5	10.8	 16
495	 14	185.0	22.9	 16
496	 14	97.3	19.3	 16
497	 14	58.5	8.9	 16
498	 14	53.5	10.7	 16
499	 14	300.3	30.5	 16
500	 14	85.8	13.5	 16
501	 14	64.5	14.3	 16
502	 14	65.0	10.4	 16
503	 14	68.3	9.4	 16
504	 14	54.0	8.2	 16
505	 14	64.3	9.2	 16
506	 14	152.5	25.5	 16
507	 14	73.8	15.9	 16
508	 14	450.3	89.4	 16
509	 14	164.3	23.6	 16
510	 14	110.0	22.1	 16
511	 14	136.0	35.4	 16
512	 14	68.8	16.8	 16
513	 14	90.3	19.5	 16
514	 14	245.3	35.8	 16
515	 14	207.3	27.6	 16
516	 14	172.3	20.3	 16
517	 14	70.3	11.2	 16
518	 14	77.5	17.3	 16
519	 14	113.3	14.9	 16
520	 14	90.3	11.6	 16
521	 14	104.0	17.2	 16
522	 14	231.0	29.0	 16
523	 14	206.3	37.0	 16
524	 14	126.5	26.9	 16
525	 14	68.3	11.4	 16
526	 14	69.0	16.2	 16
527	 14	74.3	13.7	 16
528	 14	156.0	24.0	 16
529	 14	143.8	16.5	 16
530	 14	54.5	9.0	 16
531	 14	70.3	11.5	 16
532	 14	79.3	11.8	 16
533	 14	75.0	12.5	 16
534	 14	78.8	18.2	 16
535	 14	142.0	20.1	 16
536	 14	96.5	18.9	 16
537	 14	123.3	16.9	 16
538	 14	198.0	29.6	 16
539	 14	120.0	17.1	 16
540	 14	86.8	20.3	 16
541	 14	167.8	26.4	 16
542	 14	58.0	11.1	 16
543	 14	107.3	20.1	 16
544	 14	108.0	25.3	 16
545	 14	63.5	10.3	 16
546	 14	85.3	18.7	 16
547	 14	454.3	68.8	 16
548	 14	539.0	60.4	 16
549	 14	247.0	45.6	 16
550	 14	68.3	8.4	 16
551	 14	120.5	19.7	 16
552	 14	124.0	25.1	 16
553	 14	1262.8	211.3	 16
554	 14	58.5	12.0	 16
555	 14	70.8	17.2	 16
556	 14	124.0	21.0	 16
557	 14	100.0	19.6	 16
558	 14	60.5	11.4	 16
559	 14	227.3	28.1	 16
560	 14	103.0	17.6	 16
561	 14	65.0	16.5	 16
562	 14	104.3	18.3	 20
563	 14	197.5	30.7	 16
564	 14	193.0	29.5	 16
565	 14	89.5	15.7	 16
566	 14	136.0	24.2	 16
567	 14	758.0	104.5	 16
568	 14	118.5	26.6	 16
569	 14	94.5	12.4	 16
570	 14	64.5	11.8	 16
571	 14	60.8	13.8	 16
572	 14	70.3	9.8	 16
573	 14	100.0	20.0	 16
574	 14	110.5	16.3	 16
575	 14	235.8	29.0	 16
576	 14	79.5	12.7	 16
577	 14	74.0	12.4	 16
578	 14	512.3	30.4	 16
579	 14	742.0	51.2	 16
580	 14	108.8	17.7	 16
581	 14	90.3	16.5	 16
582	 14	180.3	33.7	 16
583	 14	89.8	11.2	 16
584	 14	225.3	34.8	 16
585	 14	86.3	11.8	 16
586	 14	102.0	14.1	 16
587	 14	142.8	20.3	 16
588	 14	69.3	12.4	 16
589	 14	74.5	13.1	 16
590	 14	73.0	13.8	 16
591	 14	125.0	22.2	 16
592	 14	431.0	68.5	 16
593	 14	87.5	11.7	 16
594	 14	159.5	21.7	 16
595	 14	102.3	22.4	 16
596	 14	69.8	11.1	 16
597	 14	497.5	96.3	 16
598	 14	92.0	13.9	 16
599	 14	104.0	18.5	 16
600	 14	83.5	16.7	 16
601	 14	108.0	19.1	 16
602	 14	214.0	35.4	 16
603	 14	63.3	9.6	 16
604	 14	152.0	17.0	 16
605	 14	89.8	14.8	 16
606	 14	79.5	9.9	 16
607	 14	77.0	12.8	 16
608	 14	68.0	21.1	 16
609	 14	64.0	11.4	 16
610	 14	56.8	11.3	 16
611	 14	57.3	10.2	 16
612	 14	64.0	10.5	 16
613	 14	82.5	17.9	 16
614	 14	79.0	8.6	 16
615	 14	89.3	11.4	 16
616	 14	204.3	22.8	 16
617	 14	122.5	18.9	 16
618	 14	128.3	26.1	 16
619	 14	164.3	24.9	 16
620	 14	64.3	9.3	 16
621	 14	61.0	8.4	 16
622	 14	112.0	22.3	 16
623	 14	87.3	11.0	 16
624	 14	90.5	13.3	 16
625	 14	58.5	10.1	 16
626	 14	57.0	14.4	 16
627	 14	59.3	8.3	 16
628	 14	56.0	13.3	 16
629	 14	79.3	11.2	 16
630	 14	944.3	136.9	 16
631	 14	671.5	116.4	 16
632	 14	117.8	15.0	 16
633	 14	351.5	45.5	 16
634	 14	1043.5	65.6	 16
635	 14	156.8	26.3	 16
636	 14	145.0	28.7	 16
637	 14	62.3	9.5	 16
638	 14	144.3	16.1	 16
639	 14	103.0	15.7	 16
640	 14	87.0	13.1	 16
641	 14	122.3	14.7	 16
642	 14	118.8	23.4	 16
643	 14	129.5	14.0	 16
644	 14	162.0	32.1	 16
645	 14	143.5	21.9	 16
646	 14	100.3	13.6	 16
647	 14	99.5	13.7	 16
648	 14	88.0	16.2	 16
649	 14	58.5	8.2	 16
650	 14	65.0	10.9	 16
651	 14	62.8	9.0	 16
652	 14	107.8	16.3	 16
653	 14	73.5	10.8	 16
654	 14	63.5	9.8	 16
655	 14	60.5	9.2	 16
656	 14	57.3	10.3	 16
657	 14	83.0	12.8	 16
658	 14	209.5	23.2	 16
659	 14	172.0	29.4	 16
660	 14	1856.3	266.4	 16
661	 14	530.0	59.5	 16
662	 14	233.5	33.1	 16
663	 14	194.5	23.1	 16
664	 14	467.3	106.5	 16
665	 14	109.0	19.8	 16
666	 14	718.0	83.8	 16
667	 14	65.3	12.7	 16
668	 14	145.0	27.2	 16
669	 14	58.8	10.6	 16
670	 14	97.0	14.2	 16
671	 14	71.3	13.5	 16
672	 14	68.8	11.0	 16
673	 14	84.5	16.3	 16
674	 14	71.0	12.1	 16
675	 14	63.0	9.3	 16
676	 14	71.3	9.9	 16
677	 14	103.3	19.5	 16
678	 14	77.8	13.0	 16
679	 14	79.3	18.4	 16
680	 14	384.5	96.0	 16
681	 14	61.5	7.6	 16
682	 14	104.3	18.9	 16
683	 14	97.8	12.2	 16
684	 14	100.3	19.3	 16
685	 14	81.3	15.3	 16
686	 14	74.0	12.1	 16
687	 14	73.0	12.0	 16
688	 14	85.5	15.4	 16
689	 14	218.8	29.3	 16
690	 14	114.0	14.4	 16
691	 14	184.3	35.5	 16
692	 14	145.8	26.9	 16
693	 14	203.0	30.5	 16
694	 14	77.3	14.1	 16
695	 14	84.3	17.4	 16
696	 14	70.3	8.8	 16
697	 14	132.0	23.1	 16
698	 14	767.3	115.9	 16
699	 14	458.8	73.0	 16
700	 14	138.8	16.4	 16
701	 14	155.0	28.6	 16
702	 14	539.3	71.9	 16
703	 14	112.5	16.7	 16
704	 14	203.0	29.2	 20
705	 14	212.0	23.4	 16
706	 14	180.8	29.6	 16
707	 14	688.5	105.3	 16
708	 14	97.5	14.3	 16
709	 14	103.0	12.3	 16
710	 14	270.3	49.8	 16
711	 14	6409.0	711.4	 16
  0	 15	127.3	21.1	 16
  1	 15	178.8	31.9	 16
  2	 15	162.0	17.9	 16
  3	 15	162.0	29.8	 16
  4	 15	219.0	41.4	 16
  5	 15	104.5	17.3	 16
  6	 15	173.5	35.3	 16
  7	 15	953.8	103.8	 16
  8	 15	109.5	14.2	 16
  9	 15	146.0	23.5	 16
 10	 15	183.8	29.4	 16
 11	 15	115.0	13.8	 16
 12	 15	657.0	83.2	 16
 13	 15	115.0	20.6	 16
 14	 15	111.8	14.5	 16
 15	 15	152.0	29.2	 16
 16	 15	286.3	49.0	 16
 17	 15	255.8	29.8	 16
 18	 15	460.3	39.8	 16
 19	 15	868.5	98.2	 16
 20	 15	325.0	31.4	 16
 21	 15	113.5	19.4	 16
 22	 15	115.0	17.0	 16
 23	 15	354.0	43.7	 16
 24	 15	525.5	49.5	 16
 25	 15	141.8	19.7	 16
 26	 15	135.8	24.0	 16
 27	 15	80.0	16.1	 16
 28	 15	2586.0	310.8	 16
 29	 15	1764.3	236.2	 16
 30	 15	141.5	24.6	 16
 31	 15	613.5	92.5	 16
 32	 15	75.0	16.4	 16
 33	 15	1693.3	299.9	 16
 34	 15	99.3	14.8	 16
 35	 15	131.3	21.9	 16
 36	 15	84.3	14.2	 16
 37	 15	287.0	32.8	 16
 38	 15	120.0	18.6	 16
 39	 15	84.0	17.4	 16
 40	 15	80.5	22.1	 16
 41	 15	406.8	56.5	 16
 42	 15	101.5	19.3	 16
 43	 15	123.5	20.5	 16
 44	 15	196.3	28.8	 16
 45	 15	127.5	23.3	 16
 46	 15	165.8	29.2	 16
 47	 15	136.5	21.1	 16
 48	 15	1598.3	143.7	 16
 49	 15	378.0	48.0	 16
 50	 15	1369.0	207.0	 16
 51	 15	205.0	36.2	 16
 52	 15	143.3	22.6	 16
 53	 15	331.8	60.8	 16
 54	 15	83.0	16.0	 16
 55	 15	74.3	13.9	 16
 56	 15	93.0	17.6	 16
 57	 15	118.3	43.8	 16
 58	 15	1777.8	130.3	 16
 59	 15	1291.0	151.3	 16
 60	 15	169.3	27.5	 16
 61	 15	352.8	42.3	 16
 62	 15	490.0	50.1	 16
 63	 15	82.3	14.9	 16
 64	 15	268.3	39.4	 16
 65	 15	369.8	50.2	 16
 66	 15	107.8	24.3	 16
 67	 15	102.0	20.0	 16
 68	 15	712.0	60.0	 16
 69	 15	125.3	23.8	 16
 70	 15	371.8	57.4	 16
 71	 15	305.0	44.6	 16
 72	 15	147.8	28.3	 16
 73	 15	388.8	41.1	 16
 74	 15	967.0	136.2	 16
 75	 15	64.3	8.8	 16
 76	 15	2241.5	318.8	 16
 77	 15	105.8	18.9	 16
 78	 15	66.3	10.7	 16
 79	 15	378.8	52.6	 16
 80	 15	74.8	14.8	 16
 81	 15	264.5	33.1	 16
 82	 15	61.5	14.5	 16
 83	 15	74.3	10.0	 16
 84	 15	121.3	17.6	 16
 85	 15	1408.3	184.0	 16
 86	 15	541.5	55.3	 16
 87	 15	277.3	41.1	 16
 88	 15	113.5	17.3	 16
 89	 15	377.5	41.6	 16
 90	 15	240.8	29.7	 16
 91	 15	283.0	43.5	 16
 92	 15	529.8	56.8	 16
 93	 15	512.5	47.5	 16
 94	 15	2237.0	239.1	 16
 95	 15	824.5	92.5	 16
 96	 15	754.5	96.4	 16
 97	 15	73.5	14.2	 16
 98	 15	220.8	30.1	 16
 99	 15	142.0	23.5	 16
100	 15	108.5	20.1	 16
101	 15	8484.0	587.7	 16
102	 15	379.3	39.3	 16
103	 15	91.0	12.0	 16
104	 15	2874.0	217.8	 16
105	 15	434.8	37.4	 16
106	 15	131.5	19.4	 16
107	 15	64.0	10.4	 16
108	 15	201.8	29.4	 16
109	 15	426.5	48.7	 16
110	 15	109.8	22.5	 16
111	 15	210.3	25.2	 16
112	 15	188.3	28.3	 16
113	 15	100.5	15.0	 16
114	 15	254.8	30.1	 16
115	 15	437.0	42.7	 16
116	 15	268.3	35.2	 16
117	 15	91.5	17.7	 16
118	 15	457.3	48.0	 16
119	 15	86.0	12.9	 16
120	 15	682.8	96.3	 16
121	 15	306.5	44.0	 16
122	 15	83.3	13.8	 16
123	 15	614.5	80.2	 16
124	 15	166.5	23.8	 16
125	 15	91.0	11.7	 16
126	 15	528.0	59.1	 16
127	 15	88.8	12.5	 16
128	 15	88.0	14.7	 16
129	 15	56.5	11.2	 16
130	 15	92.5	30.7	 16
131	 15	1674.3	142.6	 16
132	 15	720.0	61.9	 16
133	 15	151.0	22.5	 16
134	 15	1101.8	103.1	 16
135	 15	58.3	11.0	 16
136	 15	194.0	21.3	 16
137	 15	4540.5	471.3	 16
138	 15	3064.8	372.8	 16
139	 15	407.0	89.6	 20
140	 15	263.8	50.8	 16
141	 15	78.3	15.8	 16
142	 15	149.0	33.8	 16
143	 15	144.0	18.5	 16
144	 15	620.0	85.1	 16
145	 15	502.5	84.7	 16
146	 15	167.5	26.0	 16
147	 15	80.5	14.0	 16
148	 15	518.5	62.8	 16
149	 15	127.8	19.8	 16
150	 15	232.0	39.4	 16
151	 15	387.8	51.7	 16
152	 15	481.0	79.4	 16
153	 15	435.3	75.0	 16
154	 15	152.3	25.4	 16
155	 15	63.0	9.5	 16
156	 15	115.3	27.9	 16
157	 15	347.3	50.2	 16
158	 15	174.0	24.7	 16
159	 15	417.0	73.8	 16
160	 15	653.8	103.6	 16
161	 15	3142.5	434.5	 16
162	 15	106.0	16.6	 16
163	 15	139.8	20.9	 16
164	 15	63.0	13.0	 16
165	 15	81.0	10.8	 16
166	 15	104.3	36.9	 16
167	 15	512.8	81.3	 16
168	 15	381.8	50.8	 16
169	 15	200.0	27.7	 16
170	 15	168.3	27.8	 16
171	 15	80.3	15.5	 16
172	 15	88.3	15.7	 16
173	 15	93.0	10.8	 16
174	 15	58.3	9.5	 16
175	 15	147.0	23.8	 16
176	 15	93.5	23.7	 16
177	 15	163.3	33.7	 16
178	 15	614.0	70.2	 16
179	 15	125.0	16.6	 16
180	 15	126.8	14.2	 16
181	 15	123.3	25.2	 16
182	 15	720.5	54.0	 16
183	 15	154.3	26.7	 16
184	 15	102.5	16.2	 16
185	 15	105.0	10.5	 16
186	 15	132.3	15.3	 16
187	 15	60.0	11.2	 16
188	 15	1123.0	210.7	 16
189	 15	380.3	37.9	 16
190	 15	644.8	72.7	 16
191	 15	77.5	19.9	 16
192	 15	145.3	20.5	 16
193	 15	132.5	14.0	 16
194	 15	279.3	47.0	 16
195	 15	181.0	26.6	 16
196	 15	118.5	22.5	 16
197	 15	617.0	67.8	 16
198	 15	76.8	9.1	 16
199	 15	60.8	11.5	 16
200	 15	60.5	12.9	 16
201	 15	968.5	114.9	 16
202	 15	164.5	21.4	 16
203	 15	239.3	33.7	 16
204	 15	84.0	15.5	 16
205	 15	489.5	66.4	 16
206	 15	598.5	66.6	 16
207	 15	109.8	22.1	 16
208	 15	205.8	32.5	 16
209	 15	148.5	25.7	 16
210	 15	217.5	41.0	 16
211	 15	220.3	44.8	 16
212	 15	174.0	29.6	 16
213	 15	66.5	11.8	 16
214	 15	320.0	34.9	 16
215	 15	162.3	26.6	 16
216	 15	3111.0	255.2	 16
217	 15	155.5	27.9	 16
218	 15	5592.0	387.2	 16
219	 15	1185.0	112.2	 16
220	 15	273.5	34.5	 16
221	 15	314.5	49.6	 16
222	 15	191.5	25.1	 16
223	 15	130.3	19.0	 16
224	 15	72.3	11.8	 16
225	 15	117.5	19.3	 16
226	 15	290.5	33.8	 16
227	 15	76.3	12.2	 16
228	 15	93.5	15.7	 16
229	 15	574.3	45.8	 16
230	 15	122.0	15.6	 16
231	 15	75.5	12.3	 16
232	 15	317.3	47.4	 16
233	 15	75.3	18.3	 16
234	 15	122.0	18.7	 16
235	 15	560.3	57.1	 16
236	 15	1081.5	91.9	 16
237	 15	539.8	30.2	 16
238	 15	1496.3	137.8	 16
239	 15	120.8	26.2	 16
240	 15	145.3	17.0	 16
241	 15	690.3	50.6	 16
242	 15	1776.8	160.1	 16
243	 15	80.5	13.7	 16
244	 15	100.5	22.6	 16
245	 15	178.0	25.2	 16
246	 15	407.8	59.5	 16
247	 15	73.8	13.0	 16
248	 15	715.0	90.1	 16
249	 15	2470.3	213.3	 16
250	 15	77.8	15.1	 16
251	 15	87.8	15.5	 16
252	 15	610.5	91.8	 16
253	 15	143.5	24.4	 16
254	 15	2771.8	242.7	 16
255	 15	164.0	21.7	 16
256	 15	214.5	30.3	 16
257	 15	781.5	71.8	 16
258	 15	70.3	14.2	 16
259	 15	59.5	11.1	 16
260	 15	282.0	44.2	 16
261	 15	89.3	17.3	 16
262	 15	207.8	37.3	 16
263	 15	151.3	24.9	 16
264	 15	530.3	75.0	 16
265	 15	126.3	22.9	 16
266	 15	81.3	16.1	 16
267	 15	144.0	57.6	 16
268	 15	160.5	20.3	 16
269	 15	511.3	87.9	 16
270	 15	74.3	16.6	 16
271	 15	77.5	15.6	 16
272	 15	308.3	27.9	 16
273	 15	86.8	17.5	 16
274	 15	354.8	45.1	 16
275	 15	384.5	40.9	 16
276	 15	351.0	61.7	 16
277	 15	95.8	21.4	 16
278	 15	78.3	23.3	 16
279	 15	635.8	106.4	 16
280	 15	1056.8	117.8	 16
281	 15	92.0	20.8	 20
282	 15	630.5	102.1	 16
283	 15	69.5	12.4	 16
284	 15	138.0	31.0	 16
285	 15	147.8	23.0	 16
286	 15	124.5	18.0	 16
287	 15	414.8	52.9	 16
288	 15	2205.0	298.9	 16
289	 15	146.8	23.1	 16
290	 15	474.0	67.2	 16
291	 15	171.3	27.5	 16
292	 15	4078.0	576.7	 16
293	 15	962.5	155.7	 16
294	 15	150.3	27.4	 16
295	 15	99.3	18.8	 16
296	 15	599.0	93.8	 16
297	 15	2303.8	231.2	 16
298	 15	183.8	22.9	 16
299	 15	136.5	23.6	 16
300	 15	72.0	10.5	 16
301	 15	224.5	35.2	 16
302	 15	71.3	11.2	 16
303	 15	67.3	8.8	 16
304	 15	1209.3	163.7	 16
305	 15	98.3	17.5	 16
306	 15	460.8	71.2	 16
307	 15	492.8	65.9	 16
308	 15	469.3	48.9	 16
309	 15	155.8	29.0	 16
310	 15	379.5	48.9	 16
311	 15	416.3	63.0	 16
312	 15	171.5	20.2	 16
313	 15	116.3	17.2	 16
314	 15	242.5	36.6	 16
315	 15	423.3	48.6	 16
316	 15	1115.0	112.5	 16
317	 15	276.3	31.9	 16
318	 15	114.3	17.1	 16
319	 15	369.8	35.3	 16
320	 15	126.5	11.8	 16
321	 15	183.0	30.8	 16
322	 15	279.8	33.4	 16
323	 15	152.0	20.6	 16
324	 15	1607.3	191.7	 16
325	 15	137.0	26.8	 16
326	 15	200.5	22.7	 16
327	 15	243.3	28.9	 16
328	 15	73.5	22.9	 16
329	 15	73.8	14.9	 16
330	 15	1843.8	128.7	 16
331	 15	557.0	69.2	 16
332	 15	583.0	57.4	 16
333	 15	727.3	66.5	 16
334	 15	107.5	20.2	 16
335	 15	63.0	12.4	 16
336	 15	82.3	16.1	 16
337	 15	491.0	48.5	 16
338	 15	754.8	67.6	 16
339	 15	925.0	71.8	 16
340	 15	213.3	24.7	 16
341	 15	182.5	22.4	 16
342	 15	85.8	12.9	 16
343	 15	87.8	18.2	 16
344	 15	367.0	63.9	 16
345	 15	172.8	27.1	 16
346	 15	421.5	38.6	 16
347	 15	55.8	10.1	 16
348	 15	1062.0	120.7	 16
349	 15	68.3	7.4	 16
350	 15	237.0	29.7	 16
351	 15	163.3	24.3	 16
352	 15	82.0	13.0	 16
353	 15	518.8	65.9	 16
354	 15	63.5	14.5	 16
355	 15	339.3	36.9	 16
356	 15	705.3	47.0	 16
357	 15	352.8	41.1	 16
358	 15	341.5	33.4	 16
359	 15	976.3	76.5	 16
360	 15	63.3	8.8	 16
361	 15	116.8	24.4	 16
362	 15	868.0	84.4	 16
363	 15	66.3	14.5	 16
364	 15	277.0	35.0	 16
365	 15	89.0	14.6	 16
366	 15	375.8	64.1	 16
367	 15	345.8	48.1	 16
368	 15	117.5	17.6	 16
369	 15	71.0	12.1	 16
370	 15	103.0	17.4	 16
371	 15	94.5	24.5	 16
372	 15	185.0	29.9	 16
373	 15	788.0	64.9	 16
374	 15	71.8	11.0	 16
375	 15	255.8	16.8	 16
376	 15	301.3	34.1	 16
377	 15	114.8	16.7	 16
378	 15	116.0	17.7	 16
379	 15	281.8	33.3	 16
380	 15	80.0	18.9	 16
381	 15	72.0	11.8	 16
382	 15	62.8	14.2	 16
383	 15	253.0	41.3	 16
384	 15	77.5	17.5	 16
385	 15	1318.8	202.5	 16
386	 15	103.8	20.3	 16
387	 15	758.3	116.0	 16
388	 15	429.5	50.7	 16
389	 15	244.0	33.5	 16
390	 15	73.3	18.0	 16
391	 15	92.5	14.0	 16
392	 15	88.8	15.2	 16
393	 15	1216.0	149.9	 16
394	 15	920.8	129.4	 16
395	 15	218.5	24.4	 16
396	 15	83.0	11.9	 16
397	 15	95.0	15.4	 16
398	 15	128.8	15.8	 16
399	 15	116.0	22.4	 16
400	 15	220.8	34.5	 16
401	 15	263.8	27.9	 16
402	 15	199.5	34.6	 16
403	 15	119.0	17.8	 16
404	 15	2843.0	384.1	 16
405	 15	308.5	47.6	 16
406	 15	180.8	25.0	 16
407	 15	3198.8	432.8	 16
408	 15	402.8	58.6	 16
409	 15	87.3	13.4	 16
410	 15	209.3	26.7	 16
411	 15	682.0	114.8	 16
412	 15	68.5	12.5	 16
413	 15	874.5	128.1	 16
414	 15	106.0	15.7	 16
415	 15	404.8	45.7	 16
416	 15	276.5	51.7	 16
417	 15	1122.8	186.3	 16
418	 15	427.8	63.6	 16
419	 15	481.5	36.1	 16
420	 15	76.0	10.9	 16
421	 15	115.8	22.0	 16
422	 15	120.8	21.5	 16
423	 15	486.0	53.2	 16
424	 15	288.3	49.2	 20
425	 15	66.3	10.0	 16
426	 15	69.8	16.1	 16
427	 15	166.0	29.5	 16
428	 15	64.8	10.9	 16
429	 15	70.0	12.5	 16
430	 15	308.0	165.7	 16
431	 15	15094.3	2884.3	 16
432	 15	102.3	15.2	 16
433	 15	175.3	28.6	 16
434	 15	2220.3	383.8	 16
435	 15	715.3	107.0	 16
436	 15	188.5	35.9	 16
437	 15	443.3	60.0	 16
438	 15	238.8	24.3	 16
439	 15	198.3	29.4	 16
440	 15	13392.0	2338.0	 16
441	 15	400.8	78.8	 16
442	 15	65.8	9.8	 16
443	 15	192.3	26.7	 16
444	 15	497.0	25.2	 16
445	 15	824.5	127.8	 16
446	 15	442.8	35.8	 16
447	 15	480.0	59.8	 16
448	 15	480.0	45.1	 16
449	 15	707.8	49.5	 16
450	 15	724.8	106.6	 16
451	 15	3530.8	588.2	 16
452	 15	86.3	10.5	 16
453	 15	585.5	94.3	 16
454	 15	1289.8	172.6	 16
455	 15	82.0	15.1	 16
456	 15	62.5	8.8	 16
457	 15	473.8	58.2	 16
458	 15	994.0	91.0	 16
459	 15	139.0	26.9	 16
460	 15	83.5	16.5	 16
461	 15	131.8	18.0	 16
462	 15	80.3	29.8	 16
463	 15	66.8	14.0	 16
464	 15	249.8	33.1	 16
465	 15	63.5	10.1	 16
466	 15	196.8	23.7	 16
467	 15	363.5	39.2	 16
468	 15	382.5	65.0	 16
469	 15	1038.8	101.1	 16
470	 15	121.5	22.3	 16
471	 15	616.3	77.7	 16
472	 15	86.8	15.5	 16
473	 15	203.0	28.3	 16
474	 15	239.8	27.2	 16
475	 15	167.0	19.7	 16
476	 15	99.8	17.6	 16
477	 15	282.3	33.1	 16
478	 15	1494.3	211.5	 16
479	 15	183.3	28.7	 16
480	 15	106.3	18.5	 16
481	 15	904.8	93.0	 16
482	 15	83.0	13.3	 16
483	 15	75.5	16.4	 16
484	 15	95.8	30.4	 16
485	 15	54.0	13.4	 16
486	 15	300.5	32.8	 16
487	 15	113.5	20.6	 16
488	 15	212.0	37.3	 16
489	 15	105.3	20.9	 16
490	 15	117.5	24.2	 16
491	 15	70.3	13.7	 16
492	 15	998.3	97.0	 16
493	 15	147.0	23.6	 16
494	 15	67.8	10.7	 16
495	 15	107.8	17.5	 16
496	 15	907.8	144.1	 16
497	 15	59.8	11.4	 16
498	 15	63.5	10.0	 16
499	 15	122.3	21.7	 16
500	 15	74.3	17.3	 16
501	 15	99.3	18.8	 16
502	 15	160.0	16.1	 16
503	 15	1335.0	149.7	 16
504	 15	290.5	39.5	 16
505	 15	949.0	99.1	 16
506	 15	97.3	13.9	 16
507	 15	1421.3	145.1	 16
508	 15	218.3	41.5	 16
509	 15	91.5	17.9	 16
510	 15	86.8	13.5	 16
511	 15	286.0	42.3	 16
512	 15	76.0	14.1	 16
513	 15	77.3	12.2	 16
514	 15	69.0	11.4	 16
515	 15	241.3	31.0	 16
516	 15	140.3	17.1	 16
517	 15	250.0	32.4	 16
518	 15	135.0	28.7	 16
519	 15	187.5	30.4	 16
520	 15	72.0	17.9	 16
521	 15	78.5	14.6	 16
522	 15	221.5	45.7	 16
523	 15	661.3	113.1	 16
524	 15	66.0	19.9	 16
525	 15	816.3	87.2	 16
526	 15	470.8	55.7	 16
527	 15	119.3	24.6	 16
528	 15	364.5	45.7	 16
529	 15	191.5	19.6	 16
530	 15	426.3	59.3	 16
531	 15	262.5	28.2	 16
532	 15	70.0	16.2	 16
533	 15	72.0	13.2	 16
534	 15	74.5	14.8	 16
535	 15	1016.8	123.4	 16
536	 15	285.3	43.1	 16
537	 15	466.8	47.8	 16
538	 15	309.0	39.8	 16
539	 15	119.0	14.4	 16
540	 15	3692.3	395.0	 16
541	 15	68.3	15.0	 16
542	 15	99.8	128.7	 16
543	 15	123.0	25.8	 16
544	 15	1072.3	165.0	 16
545	 15	440.8	55.7	 16
546	 15	94.3	15.2	 16
547	 15	662.3	83.4	 16
548	 15	158.5	28.6	 16
549	 15	64.5	11.4	 16
550	 15	66.3	12.9	 16
551	 15	61.5	10.9	 16
552	 15	248.8	36.2	 16
553	 15	1258.5	172.7	 16
554	 15	165.0	27.2	 16
555	 15	104.5	14.5	 16
556	 15	1549.5	146.3	 16
557	 15	523.0	59.8	 16
558	 15	82.5	10.4	 16
559	 15	474.0	76.9	 16
560	 15	69.3	13.8	 16
561	 15	585.0	70.7	 16
562	 15	135.8	32.3	 16
563	 15	321.5	56.4	 16
564	 15	91.0	19.0	 16
565	 15	106.5	18.4	 16
566	 15	468.3	89.1	 20
567	 15	210.3	27.1	 16
568	 15	191.0	30.3	 16
569	 15	224.0	29.2	 16
570	 15	615.0	91.8	 16
571	 15	152.5	15.7	 16
572	 15	249.3	20.6	 16
573	 15	2918.5	375.3	 16
574	 15	83.5	19.9	 16
575	 15	80.3	12.4	 16
576	 15	538.0	64.5	 16
577	 15	672.5	86.5	 16
578	 15	84.5	19.6	 16
579	 15	112.3	22.0	 16
580	 15	564.8	71.7	 16
581	 15	124.5	21.8	 16
582	 15	98.8	18.2	 16
583	 15	111.3	19.7	 16
584	 15	129.0	20.8	 16
585	 15	158.3	19.4	 16
586	 15	1684.5	193.2	 16
587	 15	179.5	21.7	 16
588	 15	251.3	33.3	 16
589	 15	85.5	12.4	 16
590	 15	66.3	14.7	 16
591	 15	103.0	15.4	 16
592	 15	607.8	60.6	 16
593	 15	183.5	25.0	 16
594	 15	90.5	11.3	 16
595	 15	265.3	42.4	 16
596	 15	258.8	30.7	 16
597	 15	170.3	32.1	 16
598	 15	315.5	46.2	 16
599	 15	379.8	51.2	 16
600	 15	1089.0	96.2	 16
601	 15	342.3	39.9	 16
602	 15	329.5	32.5	 16
603	 15	72.3	14.1	 16
604	 15	197.3	28.4	 16
605	 15	346.5	56.6	 16
606	 15	291.0	36.3	 16
607	 15	1476.0	133.7	 16
608	 15	1001.5	130.7	 16
609	 15	205.5	34.0	 16
610	 15	80.8	20.2	 16
611	 15	62.3	10.2	 16
612	 15	207.3	30.5	 16
613	 15	415.3	40.9	 16
614	 15	523.3	42.2	 16
615	 15	112.3	19.8	 16
616	 15	187.5	33.9	 16
617	 15	636.0	45.5	 16
618	 15	91.3	12.2	 16
619	 15	285.5	28.5	 16
620	 15	744.0	78.3	 16
621	 15	484.3	56.2	 16
622	 15	4577.0	373.8	 16
623	 15	1111.8	93.1	 16
624	 15	84.0	14.8	 16
625	 15	364.8	25.7	 16
626	 15	88.3	17.6	 16
627	 15	152.5	30.7	 16
628	 15	167.5	19.0	 16
629	 15	108.3	9.6	 16
630	 15	350.8	37.5	 16
631	 15	151.0	23.3	 16
632	 15	234.5	27.8	 16
633	 15	604.5	69.8	 16
634	 15	606.5	40.3	 16
635	 15	315.8	32.4	 16
636	 15	393.3	34.8	 16
637	 15	349.5	49.3	 16
638	 15	939.0	77.0	 16
639	 15	132.0	19.2	 16
640	 15	307.3	38.3	 16
641	 15	301.8	24.4	 16
642	 15	159.5	29.8	 16
643	 15	830.8	113.0	 16
644	 15	258.0	43.3	 16
645	 15	196.5	27.6	 16
646	 15	343.5	36.7	 16
647	 15	88.5	13.2	 16
648	 15	939.0	120.2	 16
649	 15	272.5	27.4	 16
650	 15	84.3	17.5	 16
651	 15	63.3	12.3	 16
652	 15	81.8	11.1	 16
653	 15	285.0	29.3	 16
654	 15	74.3	14.2	 16
655	 15	63.5	11.7	 16
656	 15	6530.8	874.9	 16
657	 15	82.5	15.0	 16
658	 15	104.3	11.8	 16
659	 15	111.0	21.8	 16
660	 15	486.3	67.9	 16
661	 15	117.3	19.9	 16
662	 15	7787.5	987.7	 16
663	 15	123.5	17.1	 16
664	 15	106.5	17.0	 16
665	 15	482.5	29.0	 16
666	 15	68.3	13.0	 16
667	 15	71.3	11.5	 16
668	 15	190.5	22.8	 16
669	 15	87.0	15.8	 16
670	 15	147.5	22.1	 16
671	 15	705.3	92.2	 16
672	 15	133.0	22.7	 16
673	 15	558.3	87.0	 16
674	 15	136.3	15.6	 16
675	 15	5275.0	641.0	 16
676	 15	357.0	41.4	 16
677	 15	105.5	20.2	 16
678	 15	545.3	103.5	 16
679	 15	121.5	14.5	 16
680	 15	69.8	10.8	 16
681	 15	59.5	11.9	 16
682	 15	77.8	16.5	 16
683	 15	267.8	45.7	 16
684	 15	271.3	34.3	 16
685	 15	357.5	61.9	 16
686	 15	1789.3	242.7	 16
687	 15	127.0	19.6	 16
688	 15	380.5	51.4	 16
689	 15	72.3	15.2	 16
690	 15	945.0	126.6	 16
691	 15	129.0	19.9	 16
692	 15	9206.8	1126.0	 16
693	 15	82.0	25.6	 16
694	 15	303.0	39.2	 16
695	 15	103.0	17.2	 16
696	 15	77.3	14.2	 16
697	 15	158.8	31.3	 16
698	 15	233.3	32.8	 16
699	 15	138.5	17.8	 16
700	 15	89.3	14.6	 16
701	 15	303.3	37.1	 16
702	 15	332.3	57.0	 16
703	 15	78.3	20.4	 16
704	 15	455.8	75.7	 16
705	 15	519.8	61.6	 16
706	 15	145.0	21.0	 16
707	 15	167.0	35.5	 16
708	 15	1130.5	199.3	 20
709	 15	84.0	13.2	 16
710	 15	4694.8	569.7	 16
711	 15	119.0	17.7	 16
  0	 16	10372.5	1857.5	 16
  1	 16	155.0	39.2	 20
  2	 16	110.0	12.9	 16
  3	 16	100.3	15.5	 16
  4	 16	125.3	19.8	 16
  5	 16	126.8	22.9	 16
  6	 16	159.5	24.9	 16
  7	 16	164.8	21.5	 16
  8	 16	108.8	17.5	 16
  9	 16	108.5	19.2	 16
 10	 16	79.3	15.3	 16
 11	 16	80.8	15.8	 16
 12	 16	175.0	29.5	 16
 13	 16	88.3	13.3	 16
 14	 16	87.3	12.4	 16
 15	 16	92.5	14.5	 16
 16	 16	267.0	21.9	 16
 17	 16	213.0	32.9	 16
 18	 16	119.8	19.2	 16
 19	 16	256.8	31.9	 16
 20	 16	166.5	31.8	 16
 21	 16	74.0	14.1	 16
 22	 16	76.5	15.2	 16
 23	 16	81.3	16.3	 16
 24	 16	175.5	26.9	 16
 25	 16	103.8	15.1	 16
 26	 16	87.5	11.7	 16
 27	 16	72.3	9.9	 16
 28	 16	194.0	30.8	 16
 29	 16	240.5	36.5	 16
 30	 16	121.5	15.7	 16
 31	 16	163.3	14.3	 16
 32	 16	71.5	7.8	 16
 33	 16	125.3	24.8	 16
 34	 16	93.3	16.9	 16
 35	 16	137.0	23.9	 16
 36	 16	93.3	16.4	 16
 37	 16	73.5	13.0	 16
 38	 16	70.3	15.2	 16
 39	 16	85.3	16.5	 16
 40	 16	75.5	16.5	 16
 41	 16	104.0	15.2	 16
 42	 16	85.5	12.4	 16
 43	 16	122.0	20.4	 16
 44	 16	175.0	23.8	 16
 45	 16	148.5	24.2	 16
 46	 16	102.0	18.3	 16
 47	 16	114.3	15.4	 16
 48	 16	869.5	67.3	 16
 49	 16	200.0	30.2	 16
 50	 16	214.0	34.0	 16
 51	 16	343.3	45.7	 16
 52	 16	187.5	33.7	 16
 53	 16	107.5	15.9	 16
 54	 16	77.3	12.5	 16
 55	 16	83.8	14.6	 16
 56	 16	120.3	18.3	 16
 57	 16	112.5	20.6	 16
 58	 16	576.3	81.7	 16
 59	 16	136.5	18.9	 16
 60	 16	84.8	19.9	 16
 61	 16	103.8	16.0	 16
 62	 16	127.3	23.9	 16
 63	 16	71.8	13.3	 16
 64	 16	333.8	34.0	 16
 65	 16	136.8	27.8	 16
 66	 16	88.0	12.4	 16
 67	 16	176.5	24.3	 16
 68	 16	295.0	45.9	 16
 69	 16	304.8	32.1	 16
 70	 16	283.0	31.0	 16
 71	 16	165.0	20.8	 16
 72	 16	618.8	36.3	 16
 73	 16	458.5	37.5	 16
 74	 16	2394.5	156.6	 16
 75	 16	70.3	14.4	 16
 76	 16	727.0	102.4	 16
 77	 16	115.3	19.5	 16
 78	 16	70.0	12.8	 16
 79	 16	69.3	13.9	 16
 80	 16	61.0	11.6	 16
 81	 16	161.8	28.9	 16
 82	 16	62.3	11.1	 16
 83	 16	68.0	11.4	 16
 84	 16	70.8	13.9	 16
 85	 16	95.3	13.4	 16
 86	 16	92.3	16.3	 16
 87	 16	63.5	12.9	 16
 88	 16	96.0	15.4	 16
 89	 16	107.0	20.0	 16
 90	 16	112.0	20.2	 16
 91	 16	106.8	13.8	 16
 92	 16	183.0	38.7	 16
 93	 16	87.5	20.3	 16
 94	 16	127.8	24.3	 16
 95	 16	215.3	21.3	 16
 96	 16	232.0	35.3	 16
 97	 16	74.5	12.0	 16
 98	 16	119.5	16.3	 16
 99	 16	86.8	15.1	 16
100	 16	104.3	13.7	 16
101	 16	1646.3	363.3	 16
102	 16	74.8	11.1	 16
103	 16	62.8	10.0	 16
104	 16	266.3	37.6	 16
105	 16	333.5	38.2	 16
106	 16	109.0	26.9	 16
107	 16	68.8	11.2	 16
108	 16	187.5	23.1	 16
109	 16	85.0	17.9	 16
110	 16	71.8	14.4	 16
111	 16	167.5	24.4	 16
112	 16	118.8	25.1	 16
113	 16	119.5	17.2	 16
114	 16	192.0	27.8	 16
115	 16	279.5	19.0	 16
116	 16	117.5	18.3	 16
117	 16	197.0	34.2	 16
118	 16	344.3	38.1	 16
119	 16	77.0	12.5	 16
120	 16	75.3	13.1	 16
121	 16	168.5	36.6	 16
122	 16	74.5	13.3	 16
123	 16	111.3	22.9	 16
124	 16	95.3	21.6	 16
125	 16	64.0	9.8	 16
126	 16	94.3	17.3	 16
127	 16	74.0	27.2	 16
128	 16	66.5	7.0	 16
129	 16	66.3	16.1	 16
130	 16	64.0	12.2	 16
131	 16	185.3	20.3	 16
132	 16	131.3	20.4	 16
133	 16	74.0	18.0	 16
134	 16	89.8	13.7	 16
135	 16	64.5	12.6	 16
136	 16	68.5	11.3	 16
137	 16	1433.5	157.7	 16
138	 16	344.3	33.6	 16
139	 16	139.3	21.7	 16
140	 16	70.0	14.1	 16
141	 16	70.0	16.1	 16
142	 16	77.5	12.5	 16
143	 16	212.0	41.6	 20
144	 16	638.8	70.0	 16
145	 16	196.8	29.0	 16
146	 16	85.5	11.4	 16
147	 16	103.3	30.0	 16
148	 16	1302.8	254.1	 16
149	 16	166.8	27.9	 16
150	 16	159.5	17.2	 16
151	 16	196.5	33.8	 16
152	 16	67.0	10.8	 16
153	 16	89.5	15.4	 16
154	 16	99.5	19.3	 16
155	 16	83.0	16.1	 16
156	 16	65.8	13.0	 16
157	 16	161.3	32.2	 16
158	 16	191.3	26.1	 16
159	 16	280.8	40.7	 16
160	 16	930.8	96.1	 16
161	 16	736.3	93.5	 16
162	 16	107.3	17.3	 16
163	 16	83.5	12.5	 16
164	 16	67.0	15.0	 16
165	 16	76.3	15.2	 16
166	 16	69.3	13.8	 16
167	 16	91.3	15.7	 16
168	 16	99.3	19.3	 16
169	 16	106.3	18.7	 16
170	 16	69.8	13.7	 16
171	 16	67.5	15.6	 16
172	 16	105.5	19.5	 16
173	 16	82.0	11.0	 16
174	 16	64.5	11.1	 16
175	 16	65.3	11.8	 16
176	 16	80.3	15.2	 16
177	 16	238.8	34.6	 16
178	 16	3789.0	279.4	 16
179	 16	132.0	21.8	 16
180	 16	91.3	13.1	 16
181	 16	239.0	35.3	 16
182	 16	320.3	28.7	 16
183	 16	233.3	33.1	 16
184	 16	144.5	24.0	 16
185	 16	86.3	13.0	 16
186	 16	69.0	7.1	 16
187	 16	84.3	17.5	 16
188	 16	309.8	51.1	 16
189	 16	198.5	31.5	 16
190	 16	231.8	31.0	 16
191	 16	78.3	11.8	 16
192	 16	121.0	22.5	 16
193	 16	117.3	25.0	 16
194	 16	229.5	25.0	 16
195	 16	135.0	20.2	 16
196	 16	75.0	13.5	 16
197	 16	89.8	14.8	 16
198	 16	69.8	10.8	 16
199	 16	71.5	16.6	 16
200	 16	59.8	11.6	 16
201	 16	121.5	19.8	 16
202	 16	247.0	23.0	 16
203	 16	101.0	15.7	 16
204	 16	73.8	14.3	 16
205	 16	207.0	22.5	 16
206	 16	139.0	20.5	 16
207	 16	103.8	17.4	 16
208	 16	136.3	20.8	 16
209	 16	135.3	28.2	 16
210	 16	71.8	13.0	 16
211	 16	71.0	16.0	 16
212	 16	65.3	14.4	 16
213	 16	62.0	16.7	 16
214	 16	70.5	15.0	 16
215	 16	73.3	18.9	 16
216	 16	490.5	99.9	 16
217	 16	142.0	16.8	 16
218	 16	602.3	105.5	 16
219	 16	337.8	58.9	 16
220	 16	114.3	14.1	 16
221	 16	122.0	15.5	 16
222	 16	190.5	38.6	 16
223	 16	77.5	14.1	 16
224	 16	68.3	14.4	 16
225	 16	84.5	19.4	 16
226	 16	90.5	18.9	 16
227	 16	72.3	11.9	 16
228	 16	80.5	14.9	 16
229	 16	729.3	53.4	 16
230	 16	96.3	15.2	 16
231	 16	54.0	11.1	 16
232	 16	66.8	13.9	 16
233	 16	57.8	7.2	 16
234	 16	338.3	68.7	 16
235	 16	590.3	83.5	 16
236	 16	772.8	68.1	 16
237	 16	219.5	25.1	 16
238	 16	106.0	15.6	 16
239	 16	160.3	27.6	 16
240	 16	109.0	15.4	 16
241	 16	119.8	21.1	 16
242	 16	215.5	36.1	 16
243	 16	89.5	13.8	 16
244	 16	70.5	11.7	 16
245	 16	115.0	15.2	 16
246	 16	85.0	9.7	 16
247	 16	86.0	14.4	 16
248	 16	89.8	14.1	 16
249	 16	692.0	61.0	 16
250	 16	76.3	11.1	 16
251	 16	78.0	12.9	 16
252	 16	82.5	10.8	 16
253	 16	108.8	25.1	 16
254	 16	1738.8	98.8	 16
255	 16	260.0	24.8	 16
256	 16	125.5	20.5	 16
257	 16	248.3	33.4	 16
258	 16	66.0	15.3	 16
259	 16	67.5	17.4	 16
260	 16	64.8	9.4	 16
261	 16	84.8	21.2	 16
262	 16	116.5	16.8	 16
263	 16	90.5	9.6	 16
264	 16	261.5	35.8	 16
265	 16	98.5	13.8	 16
266	 16	53.5	11.5	 16
267	 16	102.8	17.8	 16
268	 16	182.3	19.2	 16
269	 16	110.0	15.2	 16
270	 16	71.3	15.2	 16
271	 16	61.8	11.0	 16
272	 16	119.0	22.9	 16
273	 16	86.0	14.9	 16
274	 16	207.3	32.6	 16
275	 16	212.8	24.3	 16
276	 16	153.8	20.1	 16
277	 16	73.8	15.1	 16
278	 16	63.3	16.8	 16
279	 16	113.3	17.6	 16
280	 16	422.0	56.6	 16
281	 16	102.5	19.0	 16
282	 16	186.3	34.3	 16
283	 16	72.8	15.8	 16
284	 16	66.5	8.0	 16
285	 16	92.5	19.4	 16
286	 16	111.3	17.5	 20
287	 16	179.8	36.6	 16
288	 16	765.5	119.0	 16
289	 16	108.0	17.8	 16
290	 16	108.8	23.6	 16
291	 16	117.0	24.4	 16
292	 16	2265.5	281.6	 16
293	 16	271.5	37.1	 16
294	 16	110.0	23.2	 16
295	 16	77.0	12.9	 16
296	 16	100.8	22.0	 16
297	 16	757.3	110.3	 16
298	 16	111.3	22.5	 16
299	 16	113.3	25.4	 16
300	 16	66.5	11.6	 16
301	 16	121.5	31.9	 16
302	 16	59.0	15.2	 16
303	 16	69.5	14.7	 16
304	 16	140.3	20.9	 16
305	 16	86.8	18.8	 16
306	 16	153.0	28.7	 16
307	 16	168.8	28.5	 16
308	 16	146.3	23.3	 16
309	 16	111.0	19.9	 16
310	 16	1113.5	57.0	 16
311	 16	378.5	42.1	 16
312	 16	179.5	33.4	 16
313	 16	69.5	10.3	 16
314	 16	76.8	11.8	 16
315	 16	137.0	22.7	 16
316	 16	730.0	74.1	 16
317	 16	277.0	31.5	 16
318	 16	128.3	24.3	 16
319	 16	274.3	34.7	 16
320	 16	117.3	15.5	 16
321	 16	178.8	19.5	 16
322	 16	243.0	45.1	 16
323	 16	78.3	10.7	 16
324	 16	176.3	32.4	 16
325	 16	295.8	35.1	 16
326	 16	154.8	28.1	 16
327	 16	139.5	17.1	 16
328	 16	56.3	10.4	 16
329	 16	68.5	11.5	 16
330	 16	197.3	39.8	 16
331	 16	72.3	12.6	 16
332	 16	165.3	21.7	 16
333	 16	461.3	71.0	 16
334	 16	71.5	11.0	 16
335	 16	65.5	11.8	 16
336	 16	72.5	14.4	 16
337	 16	341.0	41.3	 16
338	 16	151.0	29.6	 16
339	 16	174.0	22.3	 16
340	 16	70.5	10.2	 16
341	 16	67.0	12.6	 16
342	 16	84.3	16.3	 16
343	 16	56.8	11.9	 16
344	 16	84.5	17.2	 16
345	 16	76.5	11.9	 16
346	 16	165.3	18.0	 16
347	 16	53.3	10.5	 16
348	 16	110.0	20.6	 16
349	 16	81.0	11.4	 16
350	 16	81.5	11.0	 16
351	 16	134.0	21.9	 16
352	 16	80.3	12.9	 16
353	 16	142.3	20.5	 16
354	 16	71.0	10.7	 16
355	 16	101.5	18.6	 16
356	 16	391.3	47.1	 16
357	 16	141.5	25.0	 16
358	 16	159.3	18.8	 16
359	 16	243.0	24.1	 16
360	 16	73.8	18.2	 16
361	 16	97.8	23.5	 16
362	 16	167.8	19.9	 16
363	 16	65.3	10.1	 16
364	 16	88.0	16.5	 16
365	 16	72.8	13.5	 16
366	 16	164.0	26.4	 16
367	 16	223.3	34.4	 16
368	 16	63.5	10.0	 16
369	 16	57.5	11.1	 16
370	 16	73.3	11.7	 16
371	 16	68.5	11.3	 16
372	 16	124.8	18.8	 16
373	 16	182.0	27.8	 16
374	 16	75.3	11.8	 16
375	 16	355.3	46.7	 16
376	 16	148.5	28.7	 16
377	 16	89.0	20.1	 16
378	 16	91.5	15.9	 16
379	 16	202.3	33.2	 16
380	 16	65.0	17.7	 16
381	 16	65.0	8.0	 16
382	 16	66.5	12.4	 16
383	 16	69.8	12.4	 16
384	 16	67.5	9.3	 16
385	 16	291.5	37.1	 16
386	 16	166.5	17.7	 16
387	 16	387.8	48.9	 16
388	 16	465.3	47.9	 16
389	 16	182.3	25.2	 16
390	 16	73.0	13.0	 16
391	 16	74.8	12.2	 16
392	 16	86.3	16.3	 16
393	 16	182.8	30.0	 16
394	 16	256.5	48.4	 16
395	 16	102.3	12.7	 16
396	 16	105.3	23.3	 16
397	 16	65.5	10.3	 16
398	 16	87.3	13.6	 16
399	 16	79.0	12.7	 16
400	 16	156.8	18.1	 16
401	 16	103.3	24.5	 16
402	 16	145.3	20.3	 16
403	 16	138.0	21.4	 16
404	 16	387.0	44.8	 16
405	 16	516.8	28.9	 16
406	 16	122.0	26.2	 16
407	 16	260.5	41.9	 16
408	 16	199.5	25.2	 16
409	 16	87.5	15.3	 16
410	 16	127.0	19.9	 16
411	 16	75.5	11.7	 16
412	 16	60.3	11.0	 16
413	 16	104.3	15.1	 16
414	 16	79.3	13.3	 16
415	 16	98.5	14.7	 16
416	 16	186.5	27.1	 16
417	 16	236.8	33.3	 16
418	 16	158.8	23.8	 16
419	 16	120.3	27.7	 16
420	 16	68.3	14.8	 16
421	 16	68.3	15.3	 16
422	 16	77.5	17.2	 16
423	 16	184.8	20.0	 16
424	 16	83.8	13.9	 16
425	 16	69.3	7.9	 16
426	 16	74.8	10.9	 16
427	 16	164.0	22.6	 16
428	 16	55.3	13.5	 20
429	 16	69.5	16.4	 16
430	 16	89.5	41.2	 16
431	 16	5734.8	1253.8	 16
432	 16	76.8	12.5	 16
433	 16	67.5	10.9	 16
434	 16	420.3	60.0	 16
435	 16	189.0	25.5	 16
436	 16	112.8	24.4	 16
437	 16	255.8	67.3	 16
438	 16	352.5	50.4	 16
439	 16	194.5	24.5	 16
440	 16	2964.8	579.0	 16
441	 16	544.3	80.8	 16
442	 16	73.5	11.3	 16
443	 16	71.3	10.4	 16
444	 16	173.0	21.4	 16
445	 16	694.5	143.2	 16
446	 16	224.3	19.5	 16
447	 16	203.3	16.8	 16
448	 16	226.3	21.4	 16
449	 16	184.5	24.5	 16
450	 16	192.5	22.9	 16
451	 16	1039.8	171.5	 16
452	 16	132.8	17.7	 16
453	 16	239.3	25.5	 16
454	 16	273.8	37.3	 16
455	 16	59.0	8.6	 16
456	 16	47.8	6.4	 16
457	 16	114.5	22.6	 16
458	 16	383.8	64.9	 16
459	 16	93.0	16.7	 16
460	 16	116.3	22.5	 16
461	 16	118.0	18.0	 16
462	 16	102.5	16.0	 16
463	 16	55.3	7.5	 16
464	 16	110.3	20.3	 16
465	 16	72.5	11.3	 16
466	 16	74.8	13.4	 16
467	 16	102.3	18.4	 16
468	 16	138.5	19.4	 16
469	 16	224.0	25.2	 16
470	 16	429.3	64.7	 16
471	 16	197.5	25.9	 16
472	 16	130.8	33.0	 16
473	 16	102.5	19.1	 16
474	 16	104.5	18.9	 16
475	 16	223.8	26.7	 16
476	 16	63.3	8.4	 16
477	 16	123.3	19.8	 16
478	 16	322.5	38.3	 16
479	 16	180.8	43.3	 16
480	 16	68.0	13.7	 16
481	 16	115.3	21.0	 16
482	 16	71.8	15.8	 16
483	 16	54.0	11.5	 16
484	 16	90.0	17.8	 16
485	 16	62.5	9.0	 16
486	 16	108.8	19.4	 16
487	 16	84.0	11.6	 16
488	 16	84.3	16.9	 16
489	 16	76.0	12.9	 16
490	 16	90.5	17.3	 16
491	 16	69.5	15.6	 16
492	 16	219.0	25.2	 16
493	 16	289.5	35.6	 16
494	 16	63.5	13.2	 16
495	 16	74.8	11.0	 16
496	 16	76.8	9.8	 16
497	 16	65.5	11.8	 16
498	 16	62.3	11.4	 16
499	 16	67.3	10.1	 16
500	 16	64.5	9.6	 16
501	 16	355.3	65.7	 16
502	 16	85.5	16.5	 16
503	 16	245.5	39.6	 16
504	 16	67.5	16.0	 16
505	 16	166.5	27.7	 16
506	 16	85.0	14.9	 16
507	 16	164.3	32.9	 16
508	 16	134.5	20.9	 16
509	 16	141.8	18.8	 16
510	 16	105.3	14.5	 16
511	 16	91.3	18.0	 16
512	 16	59.0	11.9	 16
513	 16	82.3	16.4	 16
514	 16	88.0	12.5	 16
515	 16	87.0	16.1	 16
516	 16	103.3	12.8	 16
517	 16	75.0	16.2	 16
518	 16	71.0	14.1	 16
519	 16	67.0	8.1	 16
520	 16	66.3	14.8	 16
521	 16	64.3	12.5	 16
522	 16	113.0	16.7	 16
523	 16	90.3	16.6	 16
524	 16	48.0	7.5	 16
525	 16	169.5	26.3	 16
526	 16	92.5	16.4	 16
527	 16	259.5	45.2	 16
528	 16	90.3	17.1	 16
529	 16	59.5	8.7	 16
530	 16	243.5	25.8	 16
531	 16	442.5	45.1	 16
532	 16	54.5	10.6	 16
533	 16	70.3	13.2	 16
534	 16	89.8	19.2	 16
535	 16	224.3	29.9	 16
536	 16	75.5	13.2	 16
537	 16	197.3	29.7	 16
538	 16	451.3	55.9	 16
539	 16	115.8	17.2	 16
540	 16	552.5	76.7	 16
541	 16	75.0	16.6	 16
542	 16	249.0	658.6	 16
543	 16	82.3	18.2	 16
544	 16	199.0	37.8	 16
545	 16	186.5	21.7	 16
546	 16	58.3	13.1	 16
547	 16	217.3	46.8	 16
548	 16	143.0	33.8	 16
549	 16	70.3	13.2	 16
550	 16	62.0	8.9	 16
551	 16	63.5	12.5	 16
552	 16	79.5	11.4	 16
553	 16	130.5	20.5	 16
554	 16	589.3	76.6	 16
555	 16	165.0	27.4	 16
556	 16	795.3	91.6	 16
557	 16	173.0	23.0	 16
558	 16	66.0	13.1	 16
559	 16	123.5	21.8	 16
560	 16	60.0	12.2	 16
561	 16	92.5	15.0	 16
562	 16	131.5	16.4	 16
563	 16	89.0	17.0	 16
564	 16	87.0	17.6	 16
565	 16	127.3	20.7	 16
566	 16	67.3	12.5	 16
567	 16	245.3	40.0	 16
568	 16	173.0	27.5	 16
569	 16	205.5	29.3	 16
570	 16	252.0	34.2	 16
571	 16	85.3	13.4	 20
572	 16	117.3	20.5	 16
573	 16	132.0	28.5	 16
574	 16	60.3	10.6	 16
575	 16	65.0	13.1	 16
576	 16	123.3	26.4	 16
577	 16	342.5	51.2	 16
578	 16	165.8	37.3	 16
579	 16	103.3	22.1	 16
580	 16	296.3	32.4	 16
581	 16	96.5	14.1	 16
582	 16	80.3	12.3	 16
583	 16	109.3	17.4	 16
584	 16	117.0	17.8	 16
585	 16	153.0	26.6	 16
586	 16	220.5	29.3	 16
587	 16	134.0	16.4	 16
588	 16	157.8	19.4	 16
589	 16	94.0	12.2	 16
590	 16	109.8	18.7	 16
591	 16	75.5	11.3	 16
592	 16	108.8	20.8	 16
593	 16	176.5	17.7	 16
594	 16	139.0	27.1	 16
595	 16	342.5	33.2	 16
596	 16	136.3	31.7	 16
597	 16	129.8	14.8	 16
598	 16	74.0	12.1	 16
599	 16	152.5	25.8	 16
600	 16	245.5	34.3	 16
601	 16	225.0	29.7	 16
602	 16	152.0	23.6	 16
603	 16	58.3	9.9	 16
604	 16	81.0	16.0	 16
605	 16	179.8	24.6	 16
606	 16	90.5	19.9	 16
607	 16	147.5	22.1	 16
608	 16	124.3	21.4	 16
609	 16	112.8	19.8	 16
610	 16	66.3	17.5	 16
611	 16	74.5	13.8	 16
612	 16	73.3	13.4	 16
613	 16	122.0	21.7	 16
614	 16	99.5	16.8	 16
615	 16	66.0	9.8	 16
616	 16	98.8	18.0	 16
617	 16	321.8	39.3	 16
618	 16	86.0	17.8	 16
619	 16	164.5	18.6	 16
620	 16	242.5	39.8	 16
621	 16	90.0	10.7	 16
622	 16	1042.3	96.5	 16
623	 16	1106.5	75.7	 16
624	 16	93.3	38.4	 16
625	 16	494.3	48.1	 16
626	 16	115.3	16.3	 16
627	 16	92.8	20.0	 16
628	 16	188.3	22.8	 16
629	 16	116.0	16.6	 16
630	 16	311.5	32.1	 16
631	 16	192.5	17.5	 16
632	 16	103.3	15.2	 16
633	 16	325.8	31.7	 16
634	 16	308.8	28.2	 16
635	 16	366.3	75.8	 16
636	 16	162.0	27.6	 16
637	 16	92.8	17.5	 16
638	 16	404.5	58.4	 16
639	 16	121.8	19.5	 16
640	 16	139.0	20.7	 16
641	 16	458.8	79.6	 16
642	 16	268.5	47.6	 16
643	 16	109.5	17.2	 16
644	 16	267.5	40.2	 16
645	 16	85.3	19.4	 16
646	 16	102.8	19.7	 16
647	 16	120.8	18.9	 16
648	 16	207.5	37.9	 16
649	 16	92.0	17.2	 16
650	 16	64.3	9.1	 16
651	 16	61.8	12.4	 16
652	 16	75.0	10.5	 16
653	 16	166.3	24.5	 16
654	 16	81.3	14.8	 16
655	 16	63.3	12.7	 16
656	 16	927.8	104.9	 16
657	 16	109.3	21.4	 16
658	 16	84.3	14.2	 16
659	 16	86.8	14.9	 16
660	 16	207.3	40.7	 16
661	 16	105.5	18.5	 16
662	 16	1878.0	409.7	 16
663	 16	123.5	16.6	 16
664	 16	147.5	22.5	 16
665	 16	341.5	45.1	 16
666	 16	79.3	18.0	 16
667	 16	59.3	10.7	 16
668	 16	71.8	13.9	 16
669	 16	64.0	13.0	 16
670	 16	66.3	9.6	 16
671	 16	159.3	27.0	 16
672	 16	84.5	11.3	 16
673	 16	86.3	14.3	 16
674	 16	180.5	27.5	 16
675	 16	1308.0	180.2	 16
676	 16	123.5	14.3	 16
677	 16	87.3	14.9	 16
678	 16	157.8	18.2	 16
679	 16	105.0	21.3	 16
680	 16	65.3	11.7	 16
681	 16	68.0	13.0	 16
682	 16	56.0	11.1	 16
683	 16	133.8	21.4	 16
684	 16	75.5	14.0	 16
685	 16	101.8	14.4	 16
686	 16	178.5	29.8	 16
687	 16	189.0	20.5	 16
688	 16	83.3	17.1	 16
689	 16	60.3	12.0	 16
690	 16	136.5	29.0	 16
691	 16	91.3	15.9	 16
692	 16	1354.3	235.3	 16
693	 16	76.3	12.4	 16
694	 16	137.5	13.6	 16
695	 16	67.5	13.2	 16
696	 16	101.5	13.3	 16
697	 16	107.0	19.8	 16
698	 16	107.3	14.4	 16
699	 16	76.5	21.9	 16
700	 16	102.0	15.0	 16
701	 16	176.8	37.8	 16
702	 16	842.3	168.2	 16
703	 16	94.8	23.2	 16
704	 16	601.3	110.5	 16
705	 16	505.3	76.0	 16
706	 16	154.0	21.6	 16
707	 16	127.8	26.7	 16
708	 16	256.3	58.0	 16
709	 16	71.8	17.4	 16
710	 16	523.3	111.5	 16
711	 16	6326.8	1355.6	 16
  0	 17	172.0	35.4	 16
  1	 17	131.5	20.7	 16
  2	 17	129.0	18.0	 16
  3	 17	2864.3	446.7	 16
  4	 17	379.3	56.2	 16
  5	 17	225.8	29.5	 20
  6	 17	412.3	49.7	 16
  7	 17	118.8	23.1	 16
  8	 17	673.0	67.5	 16
  9	 17	540.8	94.7	 16
 10	 17	84.0	11.6	 16
 11	 17	81.5	13.3	 16
 12	 17	173.5	31.1	 16
 13	 17	100.5	16.5	 16
 14	 17	151.3	18.2	 16
 15	 17	93.8	13.4	 16
 16	 17	234.0	24.2	 16
 17	 17	131.8	17.2	 16
 18	 17	2748.3	287.8	 16
 19	 17	160.0	18.7	 16
 20	 17	294.3	48.9	 16
 21	 17	107.5	15.7	 16
 22	 17	150.0	23.5	 16
 23	 17	79.0	11.7	 16
 24	 17	309.8	50.8	 16
 25	 17	104.3	12.2	 16
 26	 17	105.0	23.2	 16
 27	 17	66.0	10.8	 16
 28	 17	913.3	139.3	 16
 29	 17	84.3	14.5	 16
 30	 17	74.8	8.7	 16
 31	 17	77.0	13.0	 16
 32	 17	70.3	15.0	 16
 33	 17	79.5	16.4	 16
 34	 17	273.0	37.5	 16
 35	 17	453.0	56.4	 16
 36	 17	84.5	18.9	 16
 37	 17	241.0	38.0	 16
 38	 17	91.5	16.5	 16
 39	 17	698.5	59.2	 16
 40	 17	78.3	16.6	 16
 41	 17	67.0	7.8	 16
 42	 17	63.0	12.7	 16
 43	 17	99.3	20.1	 16
 44	 17	424.8	79.5	 16
 45	 17	487.3	74.9	 16
 46	 17	246.8	39.5	 16
 47	 17	490.5	63.6	 16
 48	 17	124.3	21.2	 16
 49	 17	182.0	26.7	 16
 50	 17	195.5	28.5	 16
 51	 17	192.3	33.3	 16
 52	 17	164.8	29.9	 16
 53	 17	70.3	17.6	 16
 54	 17	74.5	12.1	 16
 55	 17	72.3	11.2	 16
 56	 17	2807.3	322.2	 16
 57	 17	554.3	74.3	 16
 58	 17	88.8	20.0	 16
 59	 17	160.3	30.1	 16
 60	 17	158.0	24.3	 16
 61	 17	457.0	39.3	 16
 62	 17	175.0	24.1	 16
 63	 17	4578.5	458.7	 16
 64	 17	192.8	31.4	 16
 65	 17	236.0	22.4	 16
 66	 17	82.3	13.6	 16
 67	 17	428.3	36.6	 16
 68	 17	524.0	41.0	 16
 69	 17	862.3	62.3	 16
 70	 17	841.8	67.2	 16
 71	 17	1127.8	175.6	 16
 72	 17	261.8	33.1	 16
 73	 17	84.5	13.3	 16
 74	 17	315.8	26.4	 16
 75	 17	263.0	27.7	 16
 76	 17	251.8	32.2	 16
 77	 17	1119.8	197.5	 16
 78	 17	1748.3	146.6	 16
 79	 17	151.0	40.2	 16
 80	 17	194.3	35.9	 16
 81	 17	65.3	12.2	 16
 82	 17	101.3	12.9	 16
 83	 17	440.5	35.2	 16
 84	 17	67.5	12.6	 16
 85	 17	64.5	11.6	 16
 86	 17	76.3	11.6	 16
 87	 17	141.5	28.3	 16
 88	 17	1158.3	99.0	 16
 89	 17	2354.8	162.8	 16
 90	 17	293.0	32.8	 16
 91	 17	570.5	45.0	 16
 92	 17	237.5	21.8	 16
 93	 17	239.5	39.3	 16
 94	 17	74.3	12.7	 16
 95	 17	182.3	33.2	 16
 96	 17	967.3	123.1	 16
 97	 17	4985.5	427.5	 16
 98	 17	237.3	85.3	 16
 99	 17	2042.0	204.0	 16
100	 17	1951.5	84.4	 16
101	 17	287.0	29.6	 16
102	 17	104.3	30.1	 16
103	 17	74.5	13.9	 16
104	 17	62.3	9.6	 16
105	 17	511.8	59.4	 16
106	 17	73.5	10.8	 16
107	 17	72.8	12.0	 16
108	 17	132.5	17.9	 16
109	 17	160.5	26.4	 16
110	 17	1245.0	113.1	 16
111	 17	369.0	53.6	 16
112	 17	203.8	29.6	 16
113	 17	1046.0	71.6	 16
114	 17	156.8	18.7	 16
115	 17	540.3	52.4	 16
116	 17	183.3	30.8	 16
117	 17	239.3	38.2	 16
118	 17	261.3	25.7	 16
119	 17	291.5	31.1	 16
120	 17	81.3	16.6	 16
121	 17	67.3	16.0	 16
122	 17	367.3	64.9	 16
123	 17	88.8	20.5	 16
124	 17	618.3	50.5	 16
125	 17	246.8	37.5	 16
126	 17	320.0	39.6	 16
127	 17	193.0	34.1	 16
128	 17	65.8	10.7	 16
129	 17	339.3	41.7	 16
130	 17	74.0	16.3	 16
131	 17	226.3	21.6	 16
132	 17	96.8	17.0	 16
133	 17	115.8	16.6	 16
134	 17	133.8	31.5	 16
135	 17	112.3	17.1	 16
136	 17	119.5	14.0	 16
137	 17	341.0	42.8	 16
138	 17	80.0	12.3	 16
139	 17	141.3	19.7	 16
140	 17	219.3	41.5	 16
141	 17	75.0	11.6	 16
142	 17	1317.8	201.6	 16
143	 17	412.3	54.4	 16
144	 17	98.3	20.6	 16
145	 17	104.8	14.9	 16
146	 17	133.3	18.5	 16
147	 17	84.0	20.4	 16
148	 17	181.3	37.9	 20
149	 17	69.3	17.1	 16
150	 17	82.3	17.9	 16
151	 17	76.0	12.5	 16
152	 17	157.3	18.9	 16
153	 17	106.8	22.7	 16
154	 17	416.5	72.7	 16
155	 17	65.8	14.1	 16
156	 17	103.3	17.9	 16
157	 17	2102.8	251.4	 16
158	 17	159.8	21.5	 16
159	 17	449.3	33.7	 16
160	 17	303.0	32.8	 16
161	 17	326.0	32.4	 16
162	 17	213.0	21.1	 16
163	 17	82.8	16.8	 16
164	 17	162.3	29.9	 16
165	 17	76.3	16.1	 16
166	 17	74.5	13.2	 16
167	 17	95.8	12.5	 16
168	 17	599.3	95.5	 16
169	 17	593.3	63.1	 16
170	 17	1541.0	81.8	 16
171	 17	114.0	14.7	 16
172	 17	588.8	54.1	 16
173	 17	230.8	38.8	 16
174	 17	371.3	43.3	 16
175	 17	222.8	23.2	 16
176	 17	794.0	57.7	 16
177	 17	383.0	47.5	 16
178	 17	973.0	80.2	 16
179	 17	395.8	43.7	 16
180	 17	210.8	28.5	 16
181	 17	152.5	26.1	 16
182	 17	155.5	30.7	 16
183	 17	192.0	28.4	 16
184	 17	75.8	12.1	 16
185	 17	146.0	30.8	 16
186	 17	468.8	64.5	 16
187	 17	3432.8	381.7	 16
188	 17	73.3	15.6	 16
189	 17	132.5	17.1	 16
190	 17	100.3	14.9	 16
191	 17	334.3	45.1	 16
192	 17	89.5	19.8	 16
193	 17	260.5	38.4	 16
194	 17	3979.0	246.3	 16
195	 17	184.5	19.9	 16
196	 17	136.0	30.7	 16
197	 17	64.5	11.0	 16
198	 17	695.8	60.0	 16
199	 17	812.5	88.3	 16
200	 17	1147.8	104.2	 16
201	 17	100.5	12.5	 16
202	 17	283.8	37.4	 16
203	 17	201.0	25.2	 16
204	 17	87.8	13.8	 16
205	 17	65.8	9.6	 16
206	 17	83.8	16.9	 16
207	 17	215.8	37.9	 16
208	 17	214.3	23.3	 16
209	 17	80.3	12.5	 16
210	 17	456.0	78.2	 16
211	 17	61.5	14.2	 16
212	 17	1286.3	142.5	 16
213	 17	350.8	39.8	 16
214	 17	169.3	27.0	 16
215	 17	70.0	13.4	 16
216	 17	134.5	24.3	 16
217	 17	282.5	42.0	 16
218	 17	75.8	12.9	 16
219	 17	60.5	9.7	 16
220	 17	191.3	35.5	 16
221	 17	70.3	8.4	 16
222	 17	67.0	15.0	 16
223	 17	61.5	9.2	 16
224	 17	379.3	53.1	 16
225	 17	80.8	16.8	 16
226	 17	70.0	13.2	 16
227	 17	65.8	12.7	 16
228	 17	422.8	52.3	 16
229	 17	455.0	55.5	 16
230	 17	98.3	16.1	 16
231	 17	582.0	60.9	 16
232	 17	114.3	14.5	 16
233	 17	2340.0	412.1	 16
234	 17	585.5	64.5	 16
235	 17	178.5	24.5	 16
236	 17	79.3	13.9	 16
237	 17	189.0	24.0	 16
238	 17	63.0	8.4	 16
239	 17	248.3	39.0	 16
240	 17	81.3	13.1	 16
241	 17	1105.8	110.3	 16
242	 17	274.0	38.4	 16
243	 17	556.3	49.0	 16
244	 17	141.0	20.8	 16
245	 17	1531.8	193.1	 16
246	 17	247.3	27.2	 16
247	 17	152.5	25.0	 16
248	 17	82.8	13.4	 16
249	 17	253.5	39.6	 16
250	 17	904.3	104.8	 16
251	 17	984.5	101.1	 16
252	 17	297.0	43.5	 16
253	 17	1341.0	213.7	 16
254	 17	293.5	46.4	 16
255	 17	76.5	11.6	 16
256	 17	175.0	23.7	 16
257	 17	140.0	22.9	 16
258	 17	387.3	24.2	 16
259	 17	367.0	52.5	 16
260	 17	345.3	55.1	 16
261	 17	591.3	52.5	 16
262	 17	128.0	18.2	 16
263	 17	86.0	20.8	 16
264	 17	119.5	20.5	 16
265	 17	116.3	18.6	 16
266	 17	155.0	24.8	 16
267	 17	72.5	11.0	 16
268	 17	313.0	28.1	 16
269	 17	588.0	71.6	 16
270	 17	316.8	42.7	 16
271	 17	621.0	84.4	 16
272	 17	734.0	76.3	 16
273	 17	319.8	30.1	 16
274	 17	81.0	12.7	 16
275	 17	1568.0	237.3	 16
276	 17	190.0	22.2	 16
277	 17	516.5	68.3	 16
278	 17	263.0	34.6	 16
279	 17	156.8	33.5	 16
280	 17	70.0	13.1	 16
281	 17	83.0	14.2	 16
282	 17	137.5	28.0	 16
283	 17	68.3	8.4	 16
284	 17	87.3	15.1	 16
285	 17	66.3	15.4	 16
286	 17	68.5	13.3	 16
287	 17	109.3	27.4	 16
288	 17	181.0	19.7	 16
289	 17	87.8	19.4	 16
290	 17	219.0	36.2	 20
291	 17	105.3	23.0	 16
292	 17	181.0	24.8	 16
293	 17	110.8	24.9	 16
294	 17	54.0	9.8	 16
295	 17	115.0	19.4	 16
296	 17	72.5	16.6	 16
297	 17	71.5	15.7	 16
298	 17	201.8	46.6	 16
299	 17	87.8	15.7	 16
300	 17	756.3	104.8	 16
301	 17	209.8	22.3	 16
302	 17	1096.0	126.8	 16
303	 17	527.8	45.2	 16
304	 17	134.0	20.6	 16
305	 17	475.3	49.2	 16
306	 17	374.3	45.1	 16
307	 17	12883.0	511.1	 16
308	 17	13625.5	344.5	 16
309	 17	13720.5	1362.2	 16
310	 17	155.0	22.6	 16
311	 17	88.5	12.8	 16
312	 17	145.8	22.4	 16
313	 17	407.5	37.5	 16
314	 17	288.8	32.7	 16
315	 17	144.3	33.2	 16
316	 17	963.0	88.6	 16
317	 17	133.3	22.2	 16
318	 17	238.8	40.0	 16
319	 17	71.8	9.9	 16
320	 17	296.8	41.6	 16
321	 17	92.5	18.1	 16
322	 17	347.8	61.9	 16
323	 17	107.3	18.3	 16
324	 17	90.0	23.7	 16
325	 17	58.3	11.6	 16
326	 17	74.5	15.5	 16
327	 17	279.8	34.4	 16
328	 17	62.3	8.5	 16
329	 17	82.5	13.6	 16
330	 17	1053.5	82.6	 16
331	 17	262.8	33.5	 16
332	 17	1127.5	137.2	 16
333	 17	497.3	51.2	 16
334	 17	81.5	14.3	 16
335	 17	1148.5	114.0	 16
336	 17	395.5	34.6	 16
337	 17	171.0	16.0	 16
338	 17	283.0	26.6	 16
339	 17	4868.3	457.5	 16
340	 17	82.8	16.3	 16
341	 17	94.5	15.1	 16
342	 17	629.8	66.6	 16
343	 17	126.8	23.0	 16
344	 17	274.3	36.3	 16
345	 17	274.5	29.4	 16
346	 17	283.8	60.1	 16
347	 17	108.3	20.3	 16
348	 17	276.5	49.5	 16
349	 17	114.3	21.4	 16
350	 17	83.8	16.3	 16
351	 17	176.0	29.1	 16
352	 17	3035.5	158.8	 16
353	 17	64.5	11.8	 16
354	 17	199.8	34.8	 16
355	 17	206.0	41.5	 16
356	 17	458.0	52.4	 16
357	 17	146.0	23.8	 16
358	 17	158.5	23.0	 16
359	 17	91.3	18.6	 16
360	 17	95.8	21.3	 16
361	 17	480.0	84.2	 16
362	 17	227.5	22.5	 16
363	 17	138.0	17.8	 16
364	 17	149.8	18.3	 16
365	 17	1141.3	138.1	 16
366	 17	338.5	41.3	 16
367	 17	65.5	14.9	 16
368	 17	74.3	10.5	 16
369	 17	1093.0	106.1	 16
370	 17	155.0	26.9	 16
371	 17	65.3	12.3	 16
372	 17	106.8	27.2	 16
373	 17	135.3	19.7	 16
374	 17	69.3	13.1	 16
375	 17	120.3	23.2	 16
376	 17	918.8	112.2	 16
377	 17	234.3	36.2	 16
378	 17	165.3	22.8	 16
379	 17	93.0	26.1	 16
380	 17	80.0	16.1	 16
381	 17	159.3	23.0	 16
382	 17	73.3	12.6	 16
383	 17	173.5	25.9	 16
384	 17	157.3	16.3	 16
385	 17	506.0	45.6	 16
386	 17	198.5	18.5	 16
387	 17	708.0	103.3	 16
388	 17	75.3	15.9	 16
389	 17	147.3	29.5	 16
390	 17	71.0	11.9	 16
391	 17	209.8	33.4	 16
392	 17	196.0	30.2	 16
393	 17	95.3	14.0	 16
394	 17	167.0	29.8	 16
395	 17	316.5	34.2	 16
396	 17	101.5	17.3	 16
397	 17	64.3	11.5	 16
398	 17	119.5	19.3	 16
399	 17	272.3	29.3	 16
400	 17	172.5	24.0	 16
401	 17	115.3	23.4	 16
402	 17	205.8	30.1	 16
403	 17	306.3	36.4	 16
404	 17	162.5	30.5	 16
405	 17	102.3	20.3	 16
406	 17	199.5	40.4	 16
407	 17	1071.3	156.2	 16
408	 17	76.8	11.5	 16
409	 17	87.8	18.4	 16
410	 17	68.5	11.7	 16
411	 17	129.0	22.8	 16
412	 17	134.0	18.5	 16
413	 17	88.3	11.1	 16
414	 17	188.0	24.1	 16
415	 17	189.3	27.8	 16
416	 17	63.3	11.8	 16
417	 17	162.3	26.0	 16
418	 17	1008.5	142.3	 16
419	 17	77.0	11.3	 16
420	 17	1324.5	187.7	 16
421	 17	111.3	23.6	 16
422	 17	87.3	12.2	 16
423	 17	195.5	27.8	 16
424	 17	148.0	21.9	 16
425	 17	186.3	22.1	 16
426	 17	541.5	69.1	 16
427	 17	348.8	37.5	 16
428	 17	74.0	9.9	 16
429	 17	61.8	9.4	 16
430	 17	759.5	124.5	 16
431	 17	287.5	39.9	 16
432	 17	417.0	56.7	 16
433	 17	62.5	12.7	 20
434	 17	515.0	105.7	 16
435	 17	74.0	12.4	 16
436	 17	288.3	29.8	 16
437	 17	343.0	77.2	 16
438	 17	235.8	39.7	 16
439	 17	60.3	11.5	 16
440	 17	648.3	119.8	 16
441	 17	784.8	159.2	 16
442	 17	292.5	41.5	 16
443	 17	335.5	36.7	 16
444	 17	380.8	59.0	 16
445	 17	103.3	18.3	 16
446	 17	102.3	10.3	 16
447	 17	135.3	17.6	 16
448	 17	91.8	14.2	 16
449	 17	65.0	12.3	 16
450	 17	86.3	15.6	 16
451	 17	77.3	13.4	 16
452	 17	460.8	47.0	 16
453	 17	127.0	22.3	 16
454	 17	88.5	15.9	 16
455	 17	174.0	23.2	 16
456	 17	381.5	56.6	 16
457	 17	98.0	16.4	 16
458	 17	68.8	11.9	 16
459	 17	131.3	20.4	 16
460	 17	712.3	107.7	 16
461	 17	72.8	16.1	 16
462	 17	225.0	27.2	 16
463	 17	125.5	23.5	 16
464	 17	2571.3	306.8	 16
465	 17	1324.3	167.7	 16
466	 17	73.5	15.5	 16
467	 17	206.3	22.1	 16
468	 17	133.3	25.4	 16
469	 17	171.8	20.5	 16
470	 17	186.5	17.3	 16
471	 17	75.0	13.3	 16
472	 17	136.3	13.5	 16
473	 17	82.3	19.5	 16
474	 17	188.8	32.9	 16
475	 17	399.5	36.5	 16
476	 17	144.5	16.8	 16
477	 17	80.0	18.3	 16
478	 17	329.3	43.9	 16
479	 17	838.5	74.0	 16
480	 17	171.8	19.4	 16
481	 17	96.3	15.4	 16
482	 17	679.0	60.0	 16
483	 17	712.0	51.6	 16
484	 17	113.8	19.2	 16
485	 17	337.5	58.9	 16
486	 17	87.8	16.6	 16
487	 17	322.3	50.1	 16
488	 17	76.8	12.6	 16
489	 17	99.3	19.8	 16
490	 17	75.3	17.5	 16
491	 17	253.0	36.7	 16
492	 17	65.3	9.9	 16
493	 17	162.3	23.6	 16
494	 17	1515.0	103.2	 16
495	 17	538.8	47.3	 16
496	 17	301.3	26.5	 16
497	 17	452.0	54.6	 16
498	 17	209.8	33.2	 16
499	 17	76.3	9.6	 16
500	 17	109.0	18.3	 16
501	 17	875.5	93.5	 16
502	 17	166.8	20.2	 16
503	 17	205.5	25.5	 16
504	 17	100.5	17.3	 16
505	 17	62.0	12.5	 16
506	 17	64.5	10.2	 16
507	 17	65.5	10.8	 16
508	 17	67.3	12.5	 16
509	 17	76.8	15.1	 16
510	 17	293.3	33.1	 16
511	 17	305.3	38.4	 16
512	 17	75.0	13.5	 16
513	 17	76.3	15.2	 16
514	 17	79.5	12.6	 16
515	 17	914.0	99.1	 16
516	 17	182.8	28.7	 16
517	 17	227.8	35.3	 16
518	 17	308.3	45.7	 16
519	 17	94.5	17.8	 16
520	 17	88.5	19.4	 16
521	 17	193.0	23.5	 16
522	 17	70.3	14.2	 16
523	 17	386.0	51.2	 16
524	 17	209.3	27.5	 16
525	 17	89.5	11.8	 16
526	 17	629.5	85.2	 16
527	 17	123.5	23.6	 16
528	 17	212.0	23.3	 16
529	 17	144.5	26.8	 16
530	 17	345.8	40.0	 16
531	 17	328.5	53.6	 16
532	 17	68.0	13.2	 16
533	 17	128.8	17.4	 16
534	 17	731.3	100.5	 16
535	 17	63.0	6.9	 16
536	 17	63.3	11.4	 16
537	 17	72.3	11.8	 16
538	 17	73.5	14.1	 16
539	 17	82.3	14.1	 16
540	 17	134.3	21.2	 16
541	 17	172.3	23.5	 16
542	 17	293.3	37.3	 16
543	 17	178.5	27.4	 16
544	 17	216.3	33.5	 16
545	 17	107.8	13.0	 16
546	 17	108.0	23.0	 16
547	 17	121.0	18.1	 16
548	 17	140.5	23.7	 16
549	 17	160.5	28.6	 16
550	 17	281.8	35.4	 16
551	 17	409.8	52.8	 16
552	 17	1651.0	192.5	 16
553	 17	1026.3	110.5	 16
554	 17	978.0	104.0	 16
555	 17	593.3	61.2	 16
556	 17	144.5	22.9	 16
557	 17	82.8	15.6	 16
558	 17	210.5	25.0	 16
559	 17	1856.3	159.2	 16
560	 17	107.3	17.7	 16
561	 17	103.5	48.8	 16
562	 17	90.8	15.6	 16
563	 17	230.0	34.6	 16
564	 17	5212.5	761.5	 16
565	 17	181.5	24.5	 16
566	 17	100.0	18.7	 16
567	 17	240.0	36.2	 16
568	 17	148.0	30.0	 16
569	 17	1192.0	227.5	 16
570	 17	71.0	9.1	 16
571	 17	77.3	14.8	 16
572	 17	82.0	12.0	 16
573	 17	276.5	27.7	 16
574	 17	128.0	14.7	 16
575	 17	859.8	134.4	 20
576	 17	590.3	79.4	 16
577	 17	68.3	11.8	 16
578	 17	179.8	29.5	 16
579	 17	264.3	30.3	 16
580	 17	2065.5	166.8	 16
581	 17	281.8	34.3	 16
582	 17	332.5	37.1	 16
583	 17	142.8	20.5	 16
584	 17	4083.3	386.9	 16
585	 17	600.0	64.3	 16
586	 17	188.5	28.6	 16
587	 17	232.5	39.5	 16
588	 17	145.0	22.1	 16
589	 17	223.8	23.9	 16
590	 17	1739.0	229.7	 16
591	 17	170.0	23.4	 16
592	 17	96.5	15.0	 16
593	 17	2178.8	328.6	 16
594	 17	102.0	11.5	 16
595	 17	111.0	17.7	 16
596	 17	560.0	39.5	 16
597	 17	860.3	62.4	 16
598	 17	102.5	18.9	 16
599	 17	129.8	24.1	 16
600	 17	150.5	16.1	 16
601	 17	586.0	53.7	 16
602	 17	1834.3	101.2	 16
603	 17	201.8	25.2	 16
604	 17	579.5	63.0	 16
605	 17	198.0	17.0	 16
606	 17	287.3	33.1	 16
607	 17	168.3	16.8	 16
608	 17	189.8	22.5	 16
609	 17	232.8	19.7	 16
610	 17	256.3	40.3	 16
611	 17	278.5	35.3	 16
612	 17	68.8	14.6	 16
613	 17	55.3	11.0	 16
614	 17	97.3	17.0	 16
615	 17	1094.5	118.2	 16
616	 17	146.3	25.4	 16
617	 17	248.5	32.0	 16
618	 17	1334.8	98.2	 16
619	 17	1131.3	96.8	 16
620	 17	210.3	21.8	 16
621	 17	362.0	56.3	 16
622	 17	561.3	57.5	 16
623	 17	668.5	76.0	 16
624	 17	504.3	53.5	 16
625	 17	261.8	37.6	 16
626	 17	98.3	10.1	 16
627	 17	233.8	31.9	 16
628	 17	177.8	28.9	 16
629	 17	212.3	21.7	 16
630	 17	145.8	14.2	 16
631	 17	73.8	14.4	 16
632	 17	76.3	11.7	 16
633	 17	436.5	57.7	 16
634	 17	560.8	73.6	 16
635	 17	456.8	59.0	 16
636	 17	80.5	14.6	 16
637	 17	59.3	7.7	 16
638	 17	208.5	24.9	 16
639	 17	2070.0	202.8	 16
640	 17	357.8	29.5	 16
641	 17	258.3	23.0	 16
642	 17	1017.5	139.9	 16
643	 17	681.0	80.0	 16
644	 17	97.5	17.3	 16
645	 17	2243.5	232.6	 16
646	 17	576.3	70.5	 16
647	 17	247.5	27.0	 16
648	 17	267.0	21.3	 16
649	 17	257.5	20.2	 16
650	 17	116.3	24.6	 16
651	 17	131.3	14.1	 16
652	 17	94.8	15.0	 16
653	 17	193.0	16.1	 16
654	 17	360.3	48.9	 16
655	 17	102.0	17.2	 16
656	 17	62.3	10.2	 16
657	 17	107.0	13.4	 16
658	 17	80.0	10.7	 16
659	 17	790.0	118.8	 16
660	 17	192.5	27.8	 16
661	 17	380.8	49.9	 16
662	 17	232.5	31.4	 16
663	 17	161.5	33.3	 16
664	 17	76.3	15.2	 16
665	 17	75.3	12.6	 16
666	 17	538.5	46.2	 16
667	 17	426.8	48.2	 16
668	 17	67.5	12.8	 16
669	 17	82.8	62.6	 16
670	 17	116.5	13.0	 16
671	 17	3619.0	460.0	 16
672	 17	3881.5	311.3	 16
673	 17	73.5	13.0	 16
674	 17	621.5	70.1	 16
675	 17	549.5	98.7	 16
676	 17	248.0	26.5	 16
677	 17	525.5	49.4	 16
678	 17	119.8	13.2	 16
679	 17	183.5	27.5	 16
680	 17	221.5	27.5	 16
681	 17	158.5	22.8	 16
682	 17	116.3	23.6	 16
683	 17	110.5	14.2	 16
684	 17	245.0	26.0	 16
685	 17	301.8	38.9	 16
686	 17	132.3	30.5	 16
687	 17	296.5	30.4	 16
688	 17	633.5	74.5	 16
689	 17	70.5	15.6	 16
690	 17	94.5	15.5	 16
691	 17	185.8	19.4	 16
692	 17	197.3	31.1	 16
693	 17	219.8	33.0	 16
694	 17	655.0	119.1	 16
695	 17	90.8	15.0	 16
696	 17	146.3	21.3	 16
697	 17	285.3	36.6	 16
698	 17	356.3	31.1	 16
699	 17	82.5	13.2	 16
700	 17	157.5	28.5	 16
701	 17	382.5	80.2	 16
702	 17	328.3	58.9	 16
703	 17	611.5	125.3	 16
704	 17	207.3	35.8	 16
705	 17	164.0	30.9	 16
706	 17	101.3	17.1	 16
707	 17	161.0	22.8	 16
708	 17	171.8	25.2	 16
709	 17	262.8	44.0	 16
710	 17	233.0	54.8	 16
711	 17	109.3	19.8	 16
  0	 18	10073.0	1638.2	 16
  1	 18	154.0	35.0	 16
  2	 18	103.0	21.5	 16
  3	 18	452.5	70.1	 16
  4	 18	129.5	19.7	 16
  5	 18	228.8	30.1	 16
  6	 18	191.0	25.6	 16
  7	 18	132.3	18.8	 16
  8	 18	179.5	21.6	 16
  9	 18	122.3	26.8	 16
 10	 18	92.0	12.4	 20
 11	 18	96.5	17.5	 16
 12	 18	99.5	15.2	 16
 13	 18	96.5	13.4	 16
 14	 18	103.3	13.5	 16
 15	 18	83.0	13.1	 16
 16	 18	225.8	23.3	 16
 17	 18	102.8	18.1	 16
 18	 18	405.0	58.3	 16
 19	 18	189.3	26.1	 16
 20	 18	128.8	18.1	 16
 21	 18	120.3	16.5	 16
 22	 18	97.0	14.2	 16
 23	 18	72.5	12.1	 16
 24	 18	168.5	30.0	 16
 25	 18	86.8	15.7	 16
 26	 18	98.8	13.9	 16
 27	 18	71.8	14.3	 16
 28	 18	94.5	15.8	 16
 29	 18	69.8	15.0	 16
 30	 18	70.3	14.7	 16
 31	 18	85.0	14.8	 16
 32	 18	63.3	10.4	 16
 33	 18	72.3	14.0	 16
 34	 18	131.0	21.1	 16
 35	 18	221.0	37.5	 16
 36	 18	86.0	16.4	 16
 37	 18	106.3	12.9	 16
 38	 18	91.0	11.7	 16
 39	 18	146.0	31.7	 16
 40	 18	76.3	11.8	 16
 41	 18	74.8	14.7	 16
 42	 18	76.0	20.8	 16
 43	 18	82.3	13.8	 16
 44	 18	152.0	28.2	 16
 45	 18	285.5	54.0	 16
 46	 18	131.0	22.2	 16
 47	 18	126.5	17.7	 16
 48	 18	74.0	8.9	 16
 49	 18	83.8	11.0	 16
 50	 18	85.8	14.9	 16
 51	 18	157.0	23.5	 16
 52	 18	102.5	15.6	 16
 53	 18	59.8	11.5	 16
 54	 18	79.8	17.8	 16
 55	 18	91.0	13.1	 16
 56	 18	225.8	29.8	 16
 57	 18	68.3	9.7	 16
 58	 18	69.8	10.3	 16
 59	 18	61.3	10.0	 16
 60	 18	92.5	17.1	 16
 61	 18	111.8	18.4	 16
 62	 18	75.0	17.9	 16
 63	 18	590.3	97.5	 16
 64	 18	92.3	18.9	 16
 65	 18	117.3	35.0	 16
 66	 18	97.8	16.7	 16
 67	 18	95.5	12.5	 16
 68	 18	88.0	13.5	 16
 69	 18	422.3	43.5	 16
 70	 18	456.5	38.4	 16
 71	 18	256.8	40.0	 16
 72	 18	145.8	25.3	 16
 73	 18	104.8	23.6	 16
 74	 18	141.5	18.9	 16
 75	 18	87.8	14.5	 16
 76	 18	79.3	9.3	 16
 77	 18	161.8	38.5	 16
 78	 18	254.8	44.6	 16
 79	 18	138.3	27.5	 16
 80	 18	102.8	20.9	 16
 81	 18	85.0	16.1	 16
 82	 18	65.5	13.4	 16
 83	 18	84.8	13.4	 16
 84	 18	73.8	13.5	 16
 85	 18	78.0	15.8	 16
 86	 18	78.8	18.3	 16
 87	 18	109.3	14.8	 16
 88	 18	292.8	34.1	 16
 89	 18	432.5	57.4	 16
 90	 18	167.3	37.7	 16
 91	 18	268.3	20.2	 16
 92	 18	215.5	31.6	 16
 93	 18	221.3	27.4	 16
 94	 18	75.3	11.5	 16
 95	 18	145.3	25.9	 16
 96	 18	403.5	36.8	 16
 97	 18	561.5	73.7	 16
 98	 18	191.0	25.8	 16
 99	 18	269.0	35.9	 16
100	 18	338.8	57.7	 16
101	 18	178.5	27.4	 16
102	 18	167.0	43.9	 16
103	 18	110.8	15.8	 16
104	 18	77.0	8.0	 16
105	 18	167.5	27.3	 16
106	 18	80.0	12.2	 16
107	 18	68.5	10.6	 16
108	 18	117.3	26.6	 16
109	 18	116.3	19.2	 16
110	 18	135.8	25.7	 16
111	 18	226.3	31.5	 16
112	 18	328.5	56.1	 16
113	 18	110.3	19.2	 16
114	 18	78.0	11.4	 16
115	 18	296.3	42.2	 16
116	 18	192.5	25.8	 16
117	 18	161.3	23.0	 16
118	 18	108.8	14.6	 16
119	 18	170.8	26.8	 16
120	 18	80.0	13.5	 16
121	 18	60.3	9.0	 16
122	 18	76.0	16.1	 16
123	 18	92.3	18.4	 16
124	 18	164.8	34.3	 16
125	 18	129.3	16.3	 16
126	 18	285.5	47.0	 16
127	 18	124.5	50.7	 16
128	 18	67.3	11.2	 16
129	 18	75.0	15.0	 16
130	 18	74.3	16.3	 16
131	 18	178.3	16.8	 16
132	 18	82.5	19.0	 16
133	 18	82.8	24.2	 16
134	 18	81.8	11.8	 16
135	 18	77.3	17.4	 16
136	 18	82.0	15.7	 16
137	 18	85.3	17.5	 16
138	 18	72.5	12.4	 16
139	 18	62.3	9.2	 16
140	 18	84.5	15.8	 16
141	 18	69.5	10.9	 16
142	 18	120.8	22.7	 16
143	 18	65.3	13.8	 16
144	 18	79.3	12.4	 16
145	 18	62.0	15.9	 16
146	 18	80.0	7.3	 16
147	 18	69.0	10.8	 16
148	 18	99.3	16.0	 16
149	 18	59.3	8.8	 16
150	 18	68.8	14.2	 16
151	 18	92.3	15.7	 16
152	 18	102.5	17.3	 20
153	 18	96.3	14.3	 16
154	 18	117.0	18.7	 16
155	 18	76.5	11.6	 16
156	 18	84.8	15.6	 16
157	 18	387.8	60.4	 16
158	 18	90.3	19.8	 16
159	 18	147.5	27.8	 16
160	 18	279.8	37.9	 16
161	 18	113.0	13.1	 16
162	 18	136.8	19.9	 16
163	 18	82.0	20.3	 16
164	 18	87.8	13.2	 16
165	 18	77.0	16.0	 16
166	 18	82.0	14.6	 16
167	 18	86.5	42.1	 16
168	 18	94.3	12.8	 16
169	 18	129.3	21.2	 16
170	 18	305.5	58.3	 16
171	 18	91.0	16.4	 16
172	 18	460.8	55.8	 16
173	 18	175.3	27.0	 16
174	 18	123.8	17.8	 16
175	 18	289.8	30.1	 16
176	 18	860.5	64.6	 16
177	 18	481.0	45.4	 16
178	 18	1269.5	103.4	 16
179	 18	533.3	65.1	 16
180	 18	131.0	20.5	 16
181	 18	111.3	18.9	 16
182	 18	174.0	16.6	 16
183	 18	137.5	18.4	 16
184	 18	102.8	15.1	 16
185	 18	63.8	12.6	 16
186	 18	107.3	11.4	 16
187	 18	113.5	29.8	 16
188	 18	60.3	10.5	 16
189	 18	102.5	15.7	 16
190	 18	53.0	10.3	 16
191	 18	109.8	21.2	 16
192	 18	95.8	17.7	 16
193	 18	221.3	45.6	 16
194	 18	2294.5	166.3	 16
195	 18	312.8	37.6	 16
196	 18	76.0	12.4	 16
197	 18	57.8	10.7	 16
198	 18	133.5	18.6	 16
199	 18	285.0	43.7	 16
200	 18	425.5	58.8	 16
201	 18	114.8	14.0	 16
202	 18	152.3	27.9	 16
203	 18	148.5	19.9	 16
204	 18	84.3	16.5	 16
205	 18	96.0	12.5	 16
206	 18	202.5	27.6	 16
207	 18	61.8	10.0	 16
208	 18	70.0	11.7	 16
209	 18	66.5	12.8	 16
210	 18	272.0	27.4	 16
211	 18	66.3	13.1	 16
212	 18	207.5	36.5	 16
213	 18	109.0	20.8	 16
214	 18	93.5	19.6	 16
215	 18	62.5	11.7	 16
216	 18	59.0	11.4	 16
217	 18	111.3	19.9	 16
218	 18	87.3	18.0	 16
219	 18	74.8	10.1	 16
220	 18	91.0	17.9	 16
221	 18	56.5	16.0	 16
222	 18	65.5	12.2	 16
223	 18	47.3	7.8	 16
224	 18	80.8	11.3	 16
225	 18	53.0	8.4	 16
226	 18	62.5	8.6	 16
227	 18	71.0	16.0	 16
228	 18	105.5	14.9	 16
229	 18	140.0	24.3	 16
230	 18	80.0	19.5	 16
231	 18	800.8	55.3	 16
232	 18	156.0	20.0	 16
233	 18	624.0	53.0	 16
234	 18	417.5	65.3	 16
235	 18	98.3	13.5	 16
236	 18	59.8	13.1	 16
237	 18	264.3	30.6	 16
238	 18	61.5	7.8	 16
239	 18	135.0	22.4	 16
240	 18	76.0	13.6	 16
241	 18	84.5	17.9	 16
242	 18	252.5	23.2	 16
243	 18	665.8	63.2	 16
244	 18	124.8	21.6	 16
245	 18	260.0	40.2	 16
246	 18	107.3	24.9	 16
247	 18	62.3	13.2	 16
248	 18	111.0	17.2	 16
249	 18	99.5	35.8	 16
250	 18	85.0	11.9	 16
251	 18	90.3	28.3	 16
252	 18	77.8	12.7	 16
253	 18	89.3	15.6	 16
254	 18	96.3	15.0	 16
255	 18	76.0	12.2	 16
256	 18	109.8	19.6	 16
257	 18	72.0	11.9	 16
258	 18	290.3	31.7	 16
259	 18	94.8	16.1	 16
260	 18	124.3	17.1	 16
261	 18	1004.3	130.5	 16
262	 18	208.3	27.9	 16
263	 18	81.3	15.8	 16
264	 18	69.0	10.3	 16
265	 18	113.0	14.6	 16
266	 18	102.5	20.5	 16
267	 18	68.0	13.6	 16
268	 18	127.0	19.1	 16
269	 18	386.0	42.0	 16
270	 18	198.8	39.9	 16
271	 18	126.0	19.7	 16
272	 18	138.3	20.6	 16
273	 18	68.0	11.9	 16
274	 18	73.3	9.3	 16
275	 18	305.8	40.3	 16
276	 18	144.8	25.0	 16
277	 18	145.8	27.4	 16
278	 18	115.3	18.3	 16
279	 18	95.5	15.2	 16
280	 18	55.3	10.6	 16
281	 18	73.3	14.0	 16
282	 18	106.3	27.3	 16
283	 18	65.8	12.3	 16
284	 18	66.3	11.2	 16
285	 18	60.5	14.3	 16
286	 18	73.5	11.8	 16
287	 18	92.0	17.7	 16
288	 18	91.3	14.3	 16
289	 18	88.3	17.2	 16
290	 18	164.0	23.6	 16
291	 18	106.3	17.2	 16
292	 18	101.5	14.5	 16
293	 18	79.0	17.5	 16
294	 18	55.8	10.0	 16
295	 18	59.8	13.5	 20
296	 18	65.5	11.8	 16
297	 18	57.0	9.2	 16
298	 18	61.3	10.6	 16
299	 18	83.0	11.2	 16
300	 18	201.3	46.0	 16
301	 18	106.3	15.9	 16
302	 18	81.8	16.3	 16
303	 18	160.0	24.8	 16
304	 18	148.5	23.4	 16
305	 18	71.3	10.5	 16
306	 18	95.0	17.5	 16
307	 18	2134.8	325.7	 16
308	 18	2506.0	329.8	 16
309	 18	2470.5	445.8	 16
310	 18	100.3	23.1	 16
311	 18	75.3	13.6	 16
312	 18	128.0	19.8	 16
313	 18	211.5	26.8	 16
314	 18	146.0	27.7	 16
315	 18	212.0	51.2	 16
316	 18	834.5	84.1	 16
317	 18	81.8	14.4	 16
318	 18	90.3	15.0	 16
319	 18	80.3	17.7	 16
320	 18	60.0	9.9	 16
321	 18	75.8	15.5	 16
322	 18	124.8	22.9	 16
323	 18	82.3	11.8	 16
324	 18	72.5	12.5	 16
325	 18	66.3	12.7	 16
326	 18	72.8	13.8	 16
327	 18	84.3	14.9	 16
328	 18	77.0	13.4	 16
329	 18	72.5	18.6	 16
330	 18	190.5	25.4	 16
331	 18	192.5	33.1	 16
332	 18	109.3	18.8	 16
333	 18	202.0	29.1	 16
334	 18	76.5	12.9	 16
335	 18	228.0	26.2	 16
336	 18	149.0	23.5	 16
337	 18	81.3	19.1	 16
338	 18	150.0	27.3	 16
339	 18	1403.8	144.5	 16
340	 18	89.0	14.3	 16
341	 18	64.8	11.3	 16
342	 18	288.8	23.0	 16
343	 18	78.3	16.0	 16
344	 18	105.3	14.3	 16
345	 18	107.3	18.8	 16
346	 18	113.3	24.1	 16
347	 18	288.3	46.6	 16
348	 18	203.3	35.3	 16
349	 18	229.5	31.6	 16
350	 18	70.0	14.0	 16
351	 18	92.5	14.4	 16
352	 18	1357.3	122.0	 16
353	 18	88.3	14.4	 16
354	 18	250.8	39.2	 16
355	 18	85.5	13.8	 16
356	 18	91.3	14.3	 16
357	 18	93.5	10.7	 16
358	 18	86.8	19.5	 16
359	 18	81.8	16.4	 16
360	 18	82.0	15.1	 16
361	 18	138.3	20.5	 16
362	 18	101.5	20.3	 16
363	 18	176.0	30.7	 16
364	 18	194.3	56.2	 16
365	 18	148.0	23.8	 16
366	 18	132.8	24.7	 16
367	 18	68.8	15.8	 16
368	 18	76.8	18.3	 16
369	 18	267.5	49.5	 16
370	 18	69.3	9.5	 16
371	 18	69.5	13.2	 16
372	 18	91.3	14.5	 16
373	 18	65.3	10.6	 16
374	 18	66.0	11.6	 16
375	 18	75.0	14.1	 16
376	 18	71.0	10.5	 16
377	 18	118.3	17.2	 16
378	 18	69.8	15.5	 16
379	 18	76.8	15.7	 16
380	 18	81.0	12.6	 16
381	 18	288.8	32.5	 16
382	 18	70.8	12.5	 16
383	 18	149.3	18.1	 16
384	 18	121.3	23.6	 16
385	 18	1106.5	74.5	 16
386	 18	345.0	83.3	 16
387	 18	187.5	21.2	 16
388	 18	68.3	15.5	 16
389	 18	151.3	17.0	 16
390	 18	84.3	18.8	 16
391	 18	121.3	29.7	 16
392	 18	73.3	14.0	 16
393	 18	81.0	19.9	 16
394	 18	106.0	19.0	 16
395	 18	261.5	41.6	 16
396	 18	126.3	16.4	 16
397	 18	65.8	15.7	 16
398	 18	76.8	11.7	 16
399	 18	77.3	13.9	 16
400	 18	80.0	15.5	 16
401	 18	87.3	16.1	 16
402	 18	188.3	24.4	 16
403	 18	187.0	22.6	 16
404	 18	470.0	67.4	 16
405	 18	76.3	11.1	 16
406	 18	77.8	17.4	 16
407	 18	134.3	18.5	 16
408	 18	74.5	11.2	 16
409	 18	87.5	59.2	 16
410	 18	67.3	9.7	 16
411	 18	71.0	13.7	 16
412	 18	121.0	11.4	 16
413	 18	115.5	19.3	 16
414	 18	138.5	19.2	 16
415	 18	61.8	11.8	 16
416	 18	74.5	14.4	 16
417	 18	63.5	7.3	 16
418	 18	127.3	19.0	 16
419	 18	56.0	10.2	 16
420	 18	125.8	17.1	 16
421	 18	77.3	15.1	 16
422	 18	232.8	30.3	 16
423	 18	172.5	24.3	 16
424	 18	165.5	23.4	 16
425	 18	110.5	17.0	 16
426	 18	252.8	29.1	 16
427	 18	163.3	19.0	 16
428	 18	70.3	11.7	 16
429	 18	72.0	13.1	 16
430	 18	320.0	34.5	 16
431	 18	280.8	30.4	 16
432	 18	209.0	21.0	 16
433	 18	65.0	10.8	 16
434	 18	125.0	17.4	 16
435	 18	84.0	13.3	 16
436	 18	104.3	13.5	 16
437	 18	105.5	13.6	 20
438	 18	99.5	23.4	 16
439	 18	63.0	13.2	 16
440	 18	90.3	13.1	 16
441	 18	127.0	29.3	 16
442	 18	187.5	24.1	 16
443	 18	293.8	47.5	 16
444	 18	164.0	29.1	 16
445	 18	99.3	13.0	 16
446	 18	111.8	24.9	 16
447	 18	69.5	13.9	 16
448	 18	96.3	17.1	 16
449	 18	65.0	10.9	 16
450	 18	61.0	12.0	 16
451	 18	93.0	14.9	 16
452	 18	268.8	36.1	 16
453	 18	122.3	17.3	 16
454	 18	73.3	14.7	 16
455	 18	95.5	16.0	 16
456	 18	88.3	16.2	 16
457	 18	63.3	13.5	 16
458	 18	85.5	19.1	 16
459	 18	85.0	16.6	 16
460	 18	134.3	23.0	 16
461	 18	85.5	18.1	 16
462	 18	222.8	39.4	 16
463	 18	143.3	18.6	 16
464	 18	343.3	34.5	 16
465	 18	298.8	66.3	 16
466	 18	74.3	14.8	 16
467	 18	341.8	52.0	 16
468	 18	106.5	16.2	 16
469	 18	84.5	18.3	 16
470	 18	152.8	17.5	 16
471	 18	95.3	17.8	 16
472	 18	121.5	44.4	 16
473	 18	62.3	11.7	 16
474	 18	87.3	12.8	 16
475	 18	465.3	46.2	 16
476	 18	85.3	17.5	 16
477	 18	59.3	8.3	 16
478	 18	221.0	24.0	 16
479	 18	264.3	48.6	 16
480	 18	142.0	17.8	 16
481	 18	104.3	11.5	 16
482	 18	465.5	63.3	 16
483	 18	196.8	37.6	 16
484	 18	64.8	11.0	 16
485	 18	307.0	63.1	 16
486	 18	80.3	15.4	 16
487	 18	406.3	40.2	 16
488	 18	71.3	9.8	 16
489	 18	96.5	17.6	 16
490	 18	111.3	16.6	 16
491	 18	70.3	10.5	 16
492	 18	65.0	15.0	 16
493	 18	107.0	14.1	 16
494	 18	849.3	76.7	 16
495	 18	278.8	31.6	 16
496	 18	149.0	19.2	 16
497	 18	107.3	21.7	 16
498	 18	173.3	24.3	 16
499	 18	89.3	14.6	 16
500	 18	84.5	15.7	 16
501	 18	76.3	16.2	 16
502	 18	79.3	11.6	 16
503	 18	92.0	21.3	 16
504	 18	87.5	17.6	 16
505	 18	60.5	9.6	 16
506	 18	59.8	12.8	 16
507	 18	61.3	11.0	 16
508	 18	55.3	13.7	 16
509	 18	67.0	11.8	 16
510	 18	78.8	13.7	 16
511	 18	163.8	28.5	 16
512	 18	53.8	7.6	 16
513	 18	65.0	14.7	 16
514	 18	67.8	11.9	 16
515	 18	382.5	53.4	 16
516	 18	123.0	22.8	 16
517	 18	116.0	28.4	 16
518	 18	117.3	17.8	 16
519	 18	65.3	12.4	 16
520	 18	76.8	15.9	 16
521	 18	84.3	21.4	 16
522	 18	66.8	10.7	 16
523	 18	205.0	36.0	 16
524	 18	63.3	10.1	 16
525	 18	66.3	14.6	 16
526	 18	83.3	18.0	 16
527	 18	70.8	12.8	 16
528	 18	153.3	30.5	 16
529	 18	70.5	13.5	 16
530	 18	79.0	11.9	 16
531	 18	74.5	10.6	 16
532	 18	57.0	12.3	 16
533	 18	106.0	16.1	 16
534	 18	159.3	25.8	 16
535	 18	71.0	11.8	 16
536	 18	73.0	10.4	 16
537	 18	71.0	13.3	 16
538	 18	58.0	7.5	 16
539	 18	64.5	11.4	 16
540	 18	141.8	18.1	 16
541	 18	467.5	52.5	 16
542	 18	286.5	48.1	 16
543	 18	110.3	26.5	 16
544	 18	80.0	15.5	 16
545	 18	141.8	27.2	 16
546	 18	186.5	30.2	 16
547	 18	195.3	37.6	 16
548	 18	124.3	21.5	 16
549	 18	105.5	18.3	 16
550	 18	416.8	67.4	 16
551	 18	123.8	26.3	 16
552	 18	199.0	27.4	 16
553	 18	120.8	20.2	 16
554	 18	123.8	23.9	 16
555	 18	137.3	17.7	 16
556	 18	148.5	25.6	 16
557	 18	59.5	7.3	 16
558	 18	102.0	21.3	 16
559	 18	1381.8	160.6	 16
560	 18	107.5	18.9	 16
561	 18	59.0	6.4	 16
562	 18	76.0	14.0	 16
563	 18	230.3	29.3	 16
564	 18	585.8	98.9	 16
565	 18	78.0	16.7	 16
566	 18	76.3	14.0	 16
567	 18	116.0	18.8	 16
568	 18	80.3	11.8	 16
569	 18	120.3	15.5	 16
570	 18	71.0	9.0	 16
571	 18	67.0	11.8	 16
572	 18	73.3	10.8	 16
573	 18	195.5	29.6	 16
574	 18	149.0	30.2	 16
575	 18	866.3	97.5	 16
576	 18	528.0	119.3	 16
577	 18	127.8	20.2	 16
578	 18	108.3	14.4	 16
579	 18	117.3	19.6	 20
580	 18	934.0	52.2	 16
581	 18	225.3	26.0	 16
582	 18	244.0	32.4	 16
583	 18	85.5	12.1	 16
584	 18	796.5	119.5	 16
585	 18	329.8	47.0	 16
586	 18	189.3	25.1	 16
587	 18	69.5	13.3	 16
588	 18	73.0	13.2	 16
589	 18	158.8	26.2	 16
590	 18	273.5	46.3	 16
591	 18	79.8	14.9	 16
592	 18	87.5	14.1	 16
593	 18	82.5	11.7	 16
594	 18	67.3	13.8	 16
595	 18	105.8	17.1	 16
596	 18	620.3	85.1	 16
597	 18	238.8	22.4	 16
598	 18	81.3	14.3	 16
599	 18	124.3	24.3	 16
600	 18	113.3	19.5	 16
601	 18	748.8	69.0	 16
602	 18	1584.8	134.7	 16
603	 18	233.5	27.0	 16
604	 18	269.3	30.5	 16
605	 18	117.8	14.3	 16
606	 18	146.0	12.9	 16
607	 18	88.3	19.5	 16
608	 18	132.3	13.9	 16
609	 18	99.3	22.9	 16
610	 18	71.0	8.9	 16
611	 18	177.0	21.4	 16
612	 18	67.0	13.7	 16
613	 18	58.0	11.2	 16
614	 18	84.8	17.4	 16
615	 18	292.3	40.2	 16
616	 18	290.3	26.3	 16
617	 18	215.5	32.2	 16
618	 18	285.8	54.6	 16
619	 18	130.5	14.6	 16
620	 18	557.5	66.5	 16
621	 18	149.5	34.7	 16
622	 18	638.5	76.7	 16
623	 18	125.5	15.6	 16
624	 18	226.5	25.7	 16
625	 18	599.8	41.8	 16
626	 18	97.5	12.0	 16
627	 18	66.8	13.2	 16
628	 18	358.5	34.6	 16
629	 18	161.0	16.5	 16
630	 18	153.5	20.1	 16
631	 18	95.0	19.1	 16
632	 18	68.3	12.7	 16
633	 18	105.8	18.5	 16
634	 18	109.0	18.3	 16
635	 18	183.3	30.6	 16
636	 18	78.8	12.7	 16
637	 18	74.0	12.8	 16
638	 18	103.3	15.9	 16
639	 18	650.0	128.3	 16
640	 18	140.0	18.6	 16
641	 18	125.5	22.8	 16
642	 18	396.3	47.4	 16
643	 18	274.5	29.9	 16
644	 18	62.3	11.4	 16
645	 18	140.0	28.3	 16
646	 18	134.8	24.7	 16
647	 18	171.3	15.6	 16
648	 18	192.0	24.7	 16
649	 18	194.5	23.6	 16
650	 18	152.8	22.0	 16
651	 18	66.0	9.9	 16
652	 18	97.0	13.0	 16
653	 18	168.0	22.9	 16
654	 18	140.5	23.9	 16
655	 18	79.0	16.4	 16
656	 18	54.3	8.0	 16
657	 18	177.8	25.3	 16
658	 18	63.3	11.8	 16
659	 18	150.8	28.0	 16
660	 18	83.5	15.5	 16
661	 18	76.8	14.6	 16
662	 18	93.5	15.1	 16
663	 18	74.5	13.0	 16
664	 18	89.5	17.3	 16
665	 18	94.3	13.3	 16
666	 18	145.5	21.1	 16
667	 18	67.5	13.8	 16
668	 18	61.0	11.8	 16
669	 18	79.3	14.3	 16
670	 18	79.3	13.6	 16
671	 18	807.0	118.6	 16
672	 18	961.8	143.1	 16
673	 18	75.3	11.0	 16
674	 18	142.8	20.2	 16
675	 18	465.8	50.2	 16
676	 18	126.3	14.8	 16
677	 18	1133.3	67.0	 16
678	 18	90.3	19.2	 16
679	 18	105.0	14.8	 16
680	 18	110.5	23.3	 16
681	 18	131.3	27.7	 16
682	 18	84.8	8.5	 16
683	 18	96.3	16.8	 16
684	 18	190.3	27.7	 16
685	 18	182.0	24.9	 16
686	 18	129.0	16.4	 16
687	 18	218.5	38.0	 16
688	 18	294.5	38.4	 16
689	 18	61.5	8.1	 16
690	 18	107.0	19.7	 16
691	 18	67.8	11.2	 16
692	 18	121.3	17.3	 16
693	 18	199.8	20.9	 16
694	 18	94.3	15.9	 16
695	 18	80.0	17.2	 16
696	 18	1523.3	188.0	 16
697	 18	130.3	17.9	 16
698	 18	169.0	25.2	 16
699	 18	67.5	11.1	 16
700	 18	70.3	13.7	 16
701	 18	138.3	26.4	 16
702	 18	281.3	60.6	 16
703	 18	105.5	23.0	 16
704	 18	305.8	56.4	 16
705	 18	237.0	56.1	 16
706	 18	131.5	24.4	 16
707	 18	200.3	31.7	 16
708	 18	85.3	14.6	 16
709	 18	139.5	25.3	 16
710	 18	1035.0	173.1	 16
711	 18	6507.3	1365.8	 16
  0	 19	161.5	24.1	 16
  1	 19	199.8	24.5	 16
  2	 19	129.3	22.4	 16
  3	 19	531.0	66.5	 16
  4	 19	256.0	44.4	 16
  5	 19	384.3	70.2	 16
  6	 19	94.0	14.4	 16
  7	 19	106.5	17.4	 16
  8	 19	420.5	79.8	 16
  9	 19	90.0	14.1	 16
 10	 19	100.5	14.8	 16
 11	 19	423.8	60.6	 16
 12	 19	263.8	31.1	 16
 13	 19	196.8	20.7	 16
 14	 19	616.8	101.2	 20
 15	 19	352.5	40.4	 16
 16	 19	396.0	38.1	 16
 17	 19	382.8	42.9	 16
 18	 19	281.0	33.9	 16
 19	 19	189.5	22.1	 16
 20	 19	101.3	15.0	 16
 21	 19	146.3	19.3	 16
 22	 19	446.5	43.8	 16
 23	 19	846.8	121.9	 16
 24	 19	2097.0	316.4	 16
 25	 19	195.0	24.9	 16
 26	 19	207.3	33.4	 16
 27	 19	1066.8	182.4	 16
 28	 19	76.3	9.4	 16
 29	 19	80.3	13.1	 16
 30	 19	83.8	15.7	 16
 31	 19	542.8	71.7	 16
 32	 19	96.3	15.8	 16
 33	 19	101.3	19.9	 16
 34	 19	448.5	72.0	 16
 35	 19	254.8	43.6	 16
 36	 19	679.3	68.5	 16
 37	 19	307.8	45.0	 16
 38	 19	7225.8	1045.6	 16
 39	 19	893.8	99.8	 16
 40	 19	186.3	22.4	 16
 41	 19	85.3	16.6	 16
 42	 19	62.3	15.5	 16
 43	 19	603.5	112.3	 16
 44	 19	1242.5	170.1	 16
 45	 19	104.0	11.3	 16
 46	 19	389.3	43.6	 16
 47	 19	815.0	108.4	 16
 48	 19	221.0	23.7	 16
 49	 19	2653.8	367.2	 16
 50	 19	79.0	15.9	 16
 51	 19	240.5	28.5	 16
 52	 19	227.8	17.6	 16
 53	 19	380.3	39.1	 16
 54	 19	95.0	12.7	 16
 55	 19	975.8	104.9	 16
 56	 19	1837.5	195.3	 16
 57	 19	133.0	19.0	 16
 58	 19	451.3	54.3	 16
 59	 19	993.3	113.6	 16
 60	 19	260.5	41.3	 16
 61	 19	1090.3	127.2	 16
 62	 19	217.3	30.2	 16
 63	 19	1162.3	111.9	 16
 64	 19	318.8	41.2	 16
 65	 19	203.0	26.1	 16
 66	 19	134.5	20.1	 16
 67	 19	110.0	15.2	 16
 68	 19	127.3	25.3	 16
 69	 19	422.0	45.8	 16
 70	 19	1271.8	89.2	 16
 71	 19	1297.8	100.9	 16
 72	 19	329.3	22.4	 16
 73	 19	391.0	49.3	 16
 74	 19	1309.0	149.2	 16
 75	 19	96.0	13.0	 16
 76	 19	113.8	24.5	 16
 77	 19	1401.8	190.0	 16
 78	 19	120.0	17.2	 16
 79	 19	76.5	13.2	 16
 80	 19	72.5	11.7	 16
 81	 19	88.5	18.2	 16
 82	 19	131.0	22.5	 16
 83	 19	610.8	58.3	 16
 84	 19	139.8	17.4	 16
 85	 19	414.3	44.2	 16
 86	 19	352.0	44.1	 16
 87	 19	7084.0	6150.1	 16
 88	 19	266.8	30.0	 16
 89	 19	130.0	15.4	 16
 90	 19	2319.3	145.6	 16
 91	 19	293.5	44.4	 16
 92	 19	70.3	14.9	 16
 93	 19	84.5	12.7	 16
 94	 19	210.0	32.7	 16
 95	 19	652.8	106.3	 16
 96	 19	1570.5	155.3	 16
 97	 19	143.5	17.5	 16
 98	 19	140.3	15.9	 16
 99	 19	105.3	21.2	 16
100	 19	163.5	21.5	 16
101	 19	154.0	27.2	 16
102	 19	989.5	79.7	 16
103	 19	406.5	46.4	 16
104	 19	371.8	41.9	 16
105	 19	571.5	64.1	 16
106	 19	597.5	70.6	 16
107	 19	674.3	56.2	 16
108	 19	109.3	21.5	 16
109	 19	122.3	21.6	 16
110	 19	102.3	20.7	 16
111	 19	357.5	56.2	 16
112	 19	552.0	49.2	 16
113	 19	2665.3	305.4	 16
114	 19	115.8	20.6	 16
115	 19	129.3	22.8	 16
116	 19	132.3	19.9	 16
117	 19	79.8	15.8	 16
118	 19	71.0	14.8	 16
119	 19	4648.0	560.3	 16
120	 19	82.3	30.6	 16
121	 19	72.3	15.5	 16
122	 19	95.5	14.2	 16
123	 19	112.8	15.1	 16
124	 19	104.8	18.6	 16
125	 19	124.0	17.8	 16
126	 19	352.0	47.9	 16
127	 19	934.8	69.4	 16
128	 19	192.0	30.6	 16
129	 19	116.5	12.0	 16
130	 19	239.0	35.4	 16
131	 19	670.8	53.3	 16
132	 19	194.3	25.9	 16
133	 19	94.3	22.7	 16
134	 19	241.3	36.1	 16
135	 19	83.0	14.9	 16
136	 19	75.8	16.8	 16
137	 19	1188.3	124.8	 16
138	 19	100.8	15.5	 16
139	 19	317.0	38.7	 16
140	 19	111.3	20.9	 16
141	 19	2275.3	282.6	 16
142	 19	137.3	21.5	 16
143	 19	468.0	76.8	 16
144	 19	67.3	9.0	 16
145	 19	650.3	78.3	 16
146	 19	300.0	44.2	 16
147	 19	99.8	22.8	 16
148	 19	77.5	11.8	 16
149	 19	90.0	11.4	 16
150	 19	192.8	24.1	 16
151	 19	287.8	43.0	 16
152	 19	147.3	24.7	 16
153	 19	773.5	116.4	 16
154	 19	2129.3	228.2	 16
155	 19	464.8	62.5	 16
156	 19	106.8	19.6	 20
157	 19	470.8	69.4	 16
158	 19	1094.5	217.2	 16
159	 19	186.3	22.6	 16
160	 19	912.0	89.4	 16
161	 19	105.3	14.6	 16
162	 19	254.0	31.1	 16
163	 19	356.3	26.4	 16
164	 19	187.8	20.4	 16
165	 19	80.8	13.2	 16
166	 19	141.3	21.3	 16
167	 19	129.3	20.5	 16
168	 19	1099.0	197.1	 16
169	 19	78.8	18.6	 16
170	 19	1021.0	113.1	 16
171	 19	153.5	15.4	 16
172	 19	175.5	22.9	 16
173	 19	696.8	62.5	 16
174	 19	211.8	24.9	 16
175	 19	82.0	12.5	 16
176	 19	164.3	20.6	 16
177	 19	63.0	10.6	 16
178	 19	228.5	31.5	 16
179	 19	161.3	16.3	 16
180	 19	344.3	35.2	 16
181	 19	479.0	63.8	 16
182	 19	80.3	18.0	 16
183	 19	859.3	78.3	 16
184	 19	106.0	11.8	 16
185	 19	273.0	27.1	 16
186	 19	289.5	41.9	 16
187	 19	682.3	75.1	 16
188	 19	92.5	16.0	 16
189	 19	59.3	12.6	 16
190	 19	259.0	52.9	 16
191	 19	860.0	78.0	 16
192	 19	221.0	31.0	 16
193	 19	636.0	87.9	 16
194	 19	101.5	15.5	 16
195	 19	1385.8	105.2	 16
196	 19	72.5	12.3	 16
197	 19	104.3	19.5	 16
198	 19	103.0	21.5	 16
199	 19	612.8	60.8	 16
200	 19	704.3	93.5	 16
201	 19	1556.8	161.0	 16
202	 19	269.8	28.8	 16
203	 19	220.3	26.1	 16
204	 19	254.8	31.7	 16
205	 19	250.3	32.5	 16
206	 19	67.0	15.8	 16
207	 19	87.3	16.3	 16
208	 19	1514.0	134.3	 16
209	 19	59.5	11.1	 16
210	 19	79.8	13.4	 16
211	 19	93.5	15.6	 16
212	 19	72.3	16.9	 16
213	 19	98.3	20.1	 16
214	 19	80.3	14.8	 16
215	 19	2607.5	232.2	 16
216	 19	127.3	16.4	 16
217	 19	1390.8	144.3	 16
218	 19	165.5	22.3	 16
219	 19	93.5	15.2	 16
220	 19	83.5	21.9	 16
221	 19	107.3	17.3	 16
222	 19	1098.5	110.9	 16
223	 19	59.3	9.8	 16
224	 19	838.0	86.4	 16
225	 19	59.5	8.7	 16
226	 19	87.0	13.4	 16
227	 19	256.8	39.8	 16
228	 19	127.5	14.4	 16
229	 19	5089.0	440.8	 16
230	 19	669.3	96.3	 16
231	 19	1131.8	155.6	 16
232	 19	82.5	12.5	 16
233	 19	89.8	17.4	 16
234	 19	72.3	13.9	 16
235	 19	351.0	41.9	 16
236	 19	556.5	94.8	 16
237	 19	88.0	16.1	 16
238	 19	320.5	31.2	 16
239	 19	82.5	18.3	 16
240	 19	183.3	27.9	 16
241	 19	186.3	25.3	 16
242	 19	90.3	17.8	 16
243	 19	109.0	19.2	 16
244	 19	163.8	20.8	 16
245	 19	148.0	23.9	 16
246	 19	153.0	15.7	 16
247	 19	78.3	15.1	 16
248	 19	3656.8	362.1	 16
249	 19	67.3	13.5	 16
250	 19	63.3	12.6	 16
251	 19	80.5	18.0	 16
252	 19	71.3	13.5	 16
253	 19	62.5	12.4	 16
254	 19	86.8	16.0	 16
255	 19	73.0	14.9	 16
256	 19	77.3	12.2	 16
257	 19	212.3	34.6	 16
258	 19	80.3	14.9	 16
259	 19	391.8	46.1	 16
260	 19	216.3	26.5	 16
261	 19	477.8	62.9	 16
262	 19	907.8	75.2	 16
263	 19	83.0	17.8	 16
264	 19	335.5	43.5	 16
265	 19	101.3	17.3	 16
266	 19	304.0	33.9	 16
267	 19	213.5	33.4	 16
268	 19	113.0	17.1	 16
269	 19	298.3	53.3	 16
270	 19	245.3	41.1	 16
271	 19	2120.8	167.9	 16
272	 19	2002.5	206.1	 16
273	 19	104.3	15.2	 16
274	 19	192.0	18.7	 16
275	 19	159.5	27.8	 16
276	 19	222.3	42.2	 16
277	 19	64.5	13.9	 16
278	 19	504.8	80.4	 16
279	 19	112.3	20.7	 16
280	 19	483.8	92.0	 16
281	 19	69.0	13.4	 16
282	 19	64.0	12.1	 16
283	 19	68.0	11.5	 16
284	 19	98.8	26.8	 16
285	 19	71.8	12.2	 16
286	 19	101.8	17.2	 16
287	 19	399.3	68.9	 16
288	 19	81.5	12.1	 16
289	 19	367.3	43.2	 16
290	 19	951.0	108.3	 16
291	 19	594.3	43.9	 16
292	 19	87.8	16.9	 16
293	 19	567.3	95.7	 16
294	 19	451.8	58.7	 16
295	 19	141.3	24.3	 16
296	 19	133.3	12.1	 16
297	 19	81.5	11.7	 16
298	 19	70.0	12.2	 16
299	 19	249.0	51.5	 20
300	 19	83.5	26.2	 16
301	 19	75.5	15.8	 16
302	 19	255.0	33.9	 16
303	 19	369.0	33.1	 16
304	 19	747.8	67.0	 16
305	 19	106.3	19.3	 16
306	 19	327.8	63.3	 16
307	 19	431.5	74.4	 16
308	 19	212.8	34.9	 16
309	 19	97.8	19.4	 16
310	 19	506.3	72.6	 16
311	 19	112.8	25.9	 16
312	 19	1703.5	188.1	 16
313	 19	64.5	12.0	 16
314	 19	214.5	29.1	 16
315	 19	349.3	56.9	 16
316	 19	73.8	16.6	 16
317	 19	631.8	64.2	 16
318	 19	276.0	35.5	 16
319	 19	203.5	24.7	 16
320	 19	1028.5	122.5	 16
321	 19	580.8	62.7	 16
322	 19	88.0	23.0	 16
323	 19	101.0	30.3	 16
324	 19	157.3	18.4	 16
325	 19	60.0	11.2	 16
326	 19	1303.8	145.2	 16
327	 19	94.0	15.9	 16
328	 19	62.5	14.6	 16
329	 19	67.5	17.8	 16
330	 19	67.3	11.0	 16
331	 19	87.5	13.9	 16
332	 19	77.5	10.8	 16
333	 19	913.8	98.1	 16
334	 19	131.8	20.0	 16
335	 19	874.5	70.2	 16
336	 19	72.3	12.1	 16
337	 19	62.0	10.3	 16
338	 19	221.5	27.1	 16
339	 19	91.0	13.4	 16
340	 19	86.8	14.0	 16
341	 19	56.3	8.7	 16
342	 19	62.5	10.2	 16
343	 19	84.0	15.2	 16
344	 19	65.3	10.2	 16
345	 19	62.8	11.1	 16
346	 19	66.5	12.0	 16
347	 19	57.0	8.9	 16
348	 19	184.3	32.3	 16
349	 19	428.0	71.8	 16
350	 19	86.3	11.6	 16
351	 19	356.3	37.0	 16
352	 19	86.8	18.3	 16
353	 19	262.8	29.0	 16
354	 19	122.8	18.3	 16
355	 19	177.8	45.0	 16
356	 19	189.5	24.2	 16
357	 19	1280.5	96.2	 16
358	 19	9420.0	527.9	 16
359	 19	393.0	36.9	 16
360	 19	381.8	46.3	 16
361	 19	1424.0	102.0	 16
362	 19	146.0	27.9	 16
363	 19	248.3	42.5	 16
364	 19	619.3	63.5	 16
365	 19	120.5	20.6	 16
366	 19	203.8	29.4	 16
367	 19	77.0	13.0	 16
368	 19	115.8	17.9	 16
369	 19	216.0	25.9	 16
370	 19	76.0	12.5	 16
371	 19	96.8	15.0	 16
372	 19	202.5	34.9	 16
373	 19	458.5	65.1	 16
374	 19	285.5	36.9	 16
375	 19	85.8	16.4	 16
376	 19	368.0	60.4	 16
377	 19	550.5	56.3	 16
378	 19	102.5	16.9	 16
379	 19	76.8	17.9	 16
380	 19	6550.5	513.7	 16
381	 19	833.8	77.4	 16
382	 19	119.0	17.2	 16
383	 19	152.0	19.3	 16
384	 19	1681.5	200.3	 16
385	 19	146.0	29.2	 16
386	 19	83.0	18.3	 16
387	 19	587.0	56.1	 16
388	 19	139.5	19.6	 16
389	 19	76.5	12.4	 16
390	 19	149.5	24.6	 16
391	 19	111.3	16.2	 16
392	 19	130.0	25.7	 16
393	 19	719.3	101.3	 16
394	 19	90.3	12.1	 16
395	 19	794.3	73.2	 16
396	 19	151.0	22.3	 16
397	 19	70.3	8.6	 16
398	 19	95.3	16.3	 16
399	 19	365.8	50.7	 16
400	 19	3648.3	335.6	 16
401	 19	91.0	15.8	 16
402	 19	799.8	105.7	 16
403	 19	400.8	50.6	 16
404	 19	156.8	23.6	 16
405	 19	99.5	13.6	 16
406	 19	108.3	17.9	 16
407	 19	168.3	27.6	 16
408	 19	3392.0	439.0	 16
409	 19	8771.0	1093.5	 16
410	 19	103.5	24.0	 16
411	 19	93.8	14.6	 16
412	 19	264.3	45.3	 16
413	 19	127.3	32.6	 16
414	 19	187.3	27.5	 16
415	 19	88.3	12.0	 16
416	 19	161.3	20.8	 16
417	 19	86.0	10.8	 16
418	 19	2869.5	385.0	 16
419	 19	124.3	30.4	 16
420	 19	357.0	45.9	 16
421	 19	97.0	15.7	 16
422	 19	293.8	44.7	 16
423	 19	716.5	69.3	 16
424	 19	609.5	47.2	 16
425	 19	923.5	114.3	 16
426	 19	133.5	18.0	 16
427	 19	212.3	40.5	 16
428	 19	389.5	35.8	 16
429	 19	193.0	27.1	 16
430	 19	75.3	12.0	 16
431	 19	348.8	34.1	 16
432	 19	343.3	50.3	 16
433	 19	134.0	17.6	 16
434	 19	3473.0	529.0	 16
435	 19	120.5	18.6	 16
436	 19	326.0	45.0	 16
437	 19	390.5	68.7	 16
438	 19	74.5	16.9	 16
439	 19	58.0	11.7	 16
440	 19	129.8	21.3	 16
441	 19	300.8	36.3	 20
442	 19	127.0	20.5	 16
443	 19	214.0	30.5	 16
444	 19	529.8	73.4	 16
445	 19	196.3	21.6	 16
446	 19	244.5	37.2	 16
447	 19	113.5	17.6	 16
448	 19	111.5	21.9	 16
449	 19	138.0	24.3	 16
450	 19	72.3	14.2	 16
451	 19	196.3	18.0	 16
452	 19	137.5	25.6	 16
453	 19	65.5	12.1	 16
454	 19	69.8	14.7	 16
455	 19	68.3	10.5	 16
456	 19	186.0	28.0	 16
457	 19	69.5	12.4	 16
458	 19	1417.5	223.5	 16
459	 19	133.3	25.2	 16
460	 19	110.5	19.9	 16
461	 19	65.3	12.0	 16
462	 19	91.8	12.4	 16
463	 19	150.0	21.6	 16
464	 19	103.0	23.1	 16
465	 19	64.3	9.8	 16
466	 19	53.8	12.7	 16
467	 19	69.0	18.5	 16
468	 19	1126.0	98.6	 16
469	 19	136.0	30.5	 16
470	 19	1816.3	135.4	 16
471	 19	1052.0	103.5	 16
472	 19	127.0	26.8	 16
473	 19	171.8	14.2	 16
474	 19	70.5	11.7	 16
475	 19	454.5	46.8	 16
476	 19	608.5	63.9	 16
477	 19	78.8	20.7	 16
478	 19	162.8	24.9	 16
479	 19	172.5	34.0	 16
480	 19	191.8	31.6	 16
481	 19	129.8	45.3	 16
482	 19	132.0	20.7	 16
483	 19	71.5	13.5	 16
484	 19	69.3	13.0	 16
485	 19	751.5	58.4	 16
486	 19	781.5	57.8	 16
487	 19	426.8	39.7	 16
488	 19	1270.5	98.5	 16
489	 19	155.0	22.3	 16
490	 19	215.3	32.0	 16
491	 19	167.8	18.2	 16
492	 19	115.3	22.7	 16
493	 19	117.3	14.3	 16
494	 19	97.5	18.5	 16
495	 19	112.3	17.9	 16
496	 19	4064.5	250.3	 16
497	 19	1217.3	109.3	 16
498	 19	1830.3	173.0	 16
499	 19	75.3	13.6	 16
500	 19	72.8	14.0	 16
501	 19	98.5	11.1	 16
502	 19	121.0	26.6	 16
503	 19	712.5	69.3	 16
504	 19	109.8	16.4	 16
505	 19	174.3	24.9	 16
506	 19	148.0	24.0	 16
507	 19	592.8	28.2	 16
508	 19	101.3	14.8	 16
509	 19	3416.8	238.6	 16
510	 19	560.8	34.5	 16
511	 19	185.5	31.8	 16
512	 19	69.8	10.8	 16
513	 19	59.0	7.3	 16
514	 19	1009.8	113.2	 16
515	 19	153.5	25.4	 16
516	 19	92.5	12.1	 16
517	 19	1172.3	141.2	 16
518	 19	68.3	11.8	 16
519	 19	68.0	13.6	 16
520	 19	67.3	12.2	 16
521	 19	64.5	10.5	 16
522	 19	64.5	14.4	 16
523	 19	1210.0	146.2	 16
524	 19	119.3	25.5	 16
525	 19	249.8	40.6	 16
526	 19	558.5	97.9	 16
527	 19	116.0	20.4	 16
528	 19	120.3	17.3	 16
529	 19	405.0	38.4	 16
530	 19	218.8	30.8	 16
531	 19	1228.8	178.4	 16
532	 19	349.5	38.2	 16
533	 19	225.5	22.3	 16
534	 19	151.0	27.9	 16
535	 19	352.3	48.7	 16
536	 19	66.8	7.5	 16
537	 19	153.0	33.3	 16
538	 19	72.3	13.9	 16
539	 19	432.3	58.1	 16
540	 19	366.5	40.8	 16
541	 19	111.3	14.4	 16
542	 19	141.0	18.2	 16
543	 19	703.5	114.8	 16
544	 19	86.5	13.5	 16
545	 19	433.8	59.5	 16
546	 19	116.0	25.8	 16
547	 19	78.5	13.0	 16
548	 19	324.5	54.5	 16
549	 19	429.3	62.5	 16
550	 19	96.8	15.5	 16
551	 19	116.8	20.6	 16
552	 19	64.3	10.3	 16
553	 19	152.8	20.0	 16
554	 19	87.3	11.6	 16
555	 19	85.8	15.5	 16
556	 19	116.3	22.2	 16
557	 19	1369.3	178.2	 16
558	 19	69.5	10.0	 16
559	 19	2332.0	294.5	 16
560	 19	307.3	30.9	 16
561	 19	71.0	11.9	 16
562	 19	355.8	56.2	 16
563	 19	443.0	61.1	 16
564	 19	93.0	16.0	 16
565	 19	66.3	9.2	 16
566	 19	2188.8	429.5	 16
567	 19	95.3	16.2	 16
568	 19	1024.8	108.1	 16
569	 19	101.0	13.1	 16
570	 19	79.8	14.3	 16
571	 19	136.8	24.4	 16
572	 19	125.5	23.4	 16
573	 19	131.5	21.4	 16
574	 19	211.8	36.4	 16
575	 19	116.3	19.0	 16
576	 19	111.3	22.6	 16
577	 19	100.0	14.6	 16
578	 19	157.8	31.7	 16
579	 19	360.5	32.3	 16
580	 19	631.8	51.3	 16
581	 19	813.5	49.2	 16
582	 19	168.8	22.6	 16
583	 19	645.0	116.5	 16
584	 19	143.0	16.9	 20
585	 19	158.5	27.1	 16
586	 19	1732.8	185.4	 16
587	 19	4778.5	577.4	 16
588	 19	497.8	76.7	 16
589	 19	82.3	14.9	 16
590	 19	176.0	24.4	 16
591	 19	423.8	66.6	 16
592	 19	144.5	21.6	 16
593	 19	400.3	43.9	 16
594	 19	74.3	17.6	 16
595	 19	58.5	9.4	 16
596	 19	380.5	49.5	 16
597	 19	4095.8	357.0	 16
598	 19	75.3	12.7	 16
599	 19	194.5	28.4	 16
600	 19	120.5	14.0	 16
601	 19	112.3	21.8	 16
602	 19	552.5	48.7	 16
603	 19	284.5	32.6	 16
604	 19	106.8	19.2	 16
605	 19	171.3	22.6	 16
606	 19	117.8	16.5	 16
607	 19	461.0	66.8	 16
608	 19	693.5	44.5	 16
609	 19	118.5	19.5	 16
610	 19	107.3	20.5	 16
611	 19	94.0	15.5	 16
612	 19	111.0	18.5	 16
613	 19	206.8	24.2	 16
614	 19	792.8	88.3	 16
615	 19	1401.5	147.0	 16
616	 19	656.0	67.0	 16
617	 19	3835.3	295.7	 16
618	 19	359.8	44.8	 16
619	 19	105.8	19.7	 16
620	 19	73.3	12.3	 16
621	 19	78.0	16.8	 16
622	 19	734.3	68.5	 16
623	 19	179.8	23.5	 16
624	 19	288.0	38.5	 16
625	 19	134.8	21.0	 16
626	 19	424.3	56.0	 16
627	 19	72.0	17.5	 16
628	 19	54.8	12.1	 16
629	 19	193.3	29.0	 16
630	 19	92.0	14.2	 16
631	 19	132.8	17.6	 16
632	 19	140.8	29.2	 16
633	 19	417.5	61.4	 16
634	 19	558.8	66.0	 16
635	 19	684.3	70.6	 16
636	 19	260.5	45.3	 16
637	 19	96.0	15.1	 16
638	 19	74.0	15.7	 16
639	 19	179.3	24.9	 16
640	 19	319.8	43.3	 16
641	 19	1783.3	103.9	 16
642	 19	827.3	78.3	 16
643	 19	783.8	37.3	 16
644	 19	386.0	34.8	 16
645	 19	216.0	22.3	 16
646	 19	120.0	20.8	 16
647	 19	430.5	49.7	 16
648	 19	1177.3	128.7	 16
649	 19	297.0	51.0	 16
650	 19	261.5	29.4	 16
651	 19	342.8	37.1	 16
652	 19	152.3	22.7	 16
653	 19	329.0	49.3	 16
654	 19	948.0	118.4	 16
655	 19	139.3	21.1	 16
656	 19	99.5	17.2	 16
657	 19	147.8	21.9	 16
658	 19	107.8	16.7	 16
659	 19	77.8	14.6	 16
660	 19	305.3	44.9	 16
661	 19	208.0	28.9	 16
662	 19	139.0	14.8	 16
663	 19	57.3	5.2	 16
664	 19	56.5	11.1	 16
665	 19	56.5	9.8	 16
666	 19	483.3	41.2	 16
667	 19	97.5	14.7	 16
668	 19	71.8	15.5	 16
669	 19	958.3	136.7	 16
670	 19	94.0	9.4	 16
671	 19	169.5	19.5	 16
672	 19	73.8	16.5	 16
673	 19	71.3	14.6	 16
674	 19	138.3	21.5	 16
675	 19	73.3	12.9	 16
676	 19	422.3	47.3	 16
677	 19	229.3	20.9	 16
678	 19	67.3	14.7	 16
679	 19	55.3	8.3	 16
680	 19	63.5	13.9	 16
681	 19	74.0	14.1	 16
682	 19	89.8	18.5	 16
683	 19	959.0	143.4	 16
684	 19	481.5	73.9	 16
685	 19	341.5	40.4	 16
686	 19	75.5	17.3	 16
687	 19	98.3	18.0	 16
688	 19	282.5	32.5	 16
689	 19	450.3	59.7	 16
690	 19	333.3	40.0	 16
691	 19	70.3	12.0	 16
692	 19	373.5	34.6	 16
693	 19	414.3	43.6	 16
694	 19	181.3	28.6	 16
695	 19	274.0	48.4	 16
696	 19	2476.3	349.8	 16
697	 19	75.3	14.0	 16
698	 19	107.5	20.9	 16
699	 19	175.0	39.0	 16
700	 19	135.0	16.4	 16
701	 19	75.3	14.8	 16
702	 19	120.8	23.4	 16
703	 19	80.0	17.3	 16
704	 19	2475.8	340.5	 16
705	 19	77.5	17.7	 16
706	 19	63.0	12.6	 16
707	 19	291.0	32.8	 16
708	 19	682.5	116.0	 16
709	 19	567.3	78.6	 16
710	 19	259.3	34.1	 16
711	 19	138.8	31.0	 16
  0	 20	10293.0	1575.8	 16
  1	 20	190.0	27.1	 16
  2	 20	117.0	17.3	 16
  3	 20	243.5	42.6	 16
  4	 20	483.5	38.4	 16
  5	 20	106.5	11.0	 16
  6	 20	99.0	16.9	 16
  7	 20	111.8	15.0	 16
  8	 20	107.3	14.3	 16
  9	 20	86.3	17.7	 16
 10	 20	100.3	11.6	 16
 11	 20	100.3	14.4	 16
 12	 20	114.8	22.0	 16
 13	 20	150.5	25.4	 16
 14	 20	246.3	38.5	 16
 15	 20	268.8	38.8	 16
 16	 20	214.8	35.0	 16
 17	 20	263.5	26.4	 16
 18	 20	411.5	57.7	 20
 19	 20	220.0	23.3	 16
 20	 20	168.8	19.9	 16
 21	 20	140.5	18.7	 16
 22	 20	137.5	20.6	 16
 23	 20	138.3	29.1	 16
 24	 20	327.3	69.3	 16
 25	 20	176.5	19.6	 16
 26	 20	73.8	12.2	 16
 27	 20	156.0	28.4	 16
 28	 20	82.5	15.2	 16
 29	 20	117.5	98.9	 16
 30	 20	83.5	13.3	 16
 31	 20	281.5	69.4	 16
 32	 20	78.3	13.0	 16
 33	 20	114.5	28.8	 16
 34	 20	106.0	22.6	 16
 35	 20	663.0	124.6	 16
 36	 20	87.5	15.6	 16
 37	 20	87.3	15.8	 16
 38	 20	501.5	145.8	 16
 39	 20	236.3	23.9	 16
 40	 20	191.5	23.1	 16
 41	 20	74.8	13.9	 16
 42	 20	76.5	13.9	 16
 43	 20	74.8	14.3	 16
 44	 20	212.8	29.0	 16
 45	 20	80.0	13.1	 16
 46	 20	87.0	17.7	 16
 47	 20	128.3	23.9	 16
 48	 20	384.0	44.0	 16
 49	 20	527.8	81.6	 16
 50	 20	76.8	14.8	 16
 51	 20	159.5	30.6	 16
 52	 20	103.0	19.9	 16
 53	 20	408.3	56.5	 16
 54	 20	117.3	12.2	 16
 55	 20	335.3	37.5	 16
 56	 20	371.3	27.5	 16
 57	 20	146.8	27.1	 16
 58	 20	265.8	25.6	 16
 59	 20	313.8	38.4	 16
 60	 20	587.0	69.7	 16
 61	 20	95.0	15.9	 16
 62	 20	320.3	33.8	 16
 63	 20	580.8	51.9	 16
 64	 20	179.5	21.2	 16
 65	 20	163.8	27.9	 16
 66	 20	76.0	12.8	 16
 67	 20	78.0	11.5	 16
 68	 20	96.3	14.6	 16
 69	 20	183.3	21.3	 16
 70	 20	440.5	31.5	 16
 71	 20	184.0	23.4	 16
 72	 20	122.8	25.1	 16
 73	 20	320.3	32.6	 16
 74	 20	189.5	22.6	 16
 75	 20	97.8	16.9	 16
 76	 20	124.5	14.0	 16
 77	 20	415.8	49.2	 16
 78	 20	206.8	52.0	 12
 79	 20	73.8	13.5	 16
 80	 20	78.5	19.6	 16
 81	 20	77.5	15.1	 16
 82	 20	69.3	11.9	 16
 83	 20	259.8	40.4	 16
 84	 20	169.5	18.9	 16
 85	 20	170.8	27.7	 16
 86	 20	80.3	17.8	 16
 87	 20	778.5	97.5	 16
 88	 20	108.3	19.6	 16
 89	 20	101.5	22.9	 16
 90	 20	453.3	58.7	 16
 91	 20	156.5	20.1	 16
 92	 20	70.3	11.9	 16
 93	 20	78.3	12.0	 16
 94	 20	86.0	13.7	 16
 95	 20	123.8	28.3	 16
 96	 20	426.3	36.0	 16
 97	 20	103.0	16.7	 16
 98	 20	258.0	25.0	 16
 99	 20	163.5	23.4	 16
100	 20	115.0	18.0	 16
101	 20	86.3	16.4	 16
102	 20	1152.0	152.9	 16
103	 20	555.5	67.5	 16
104	 20	377.3	62.5	 16
105	 20	156.3	27.7	 16
106	 20	99.0	15.9	 16
107	 20	100.3	16.5	 16
108	 20	78.0	15.4	 16
109	 20	117.5	17.2	 16
110	 20	79.3	15.2	 16
111	 20	113.3	21.0	 16
112	 20	126.3	21.5	 16
113	 20	312.3	35.8	 16
114	 20	80.0	14.2	 16
115	 20	75.3	10.0	 16
116	 20	76.3	12.5	 16
117	 20	66.5	17.9	 16
118	 20	63.3	14.5	 16
119	 20	514.5	81.1	 16
120	 20	93.3	23.9	 16
121	 20	75.0	16.4	 16
122	 20	79.0	15.9	 16
123	 20	96.8	20.4	 16
124	 20	79.5	18.0	 16
125	 20	91.8	13.3	 16
126	 20	978.0	113.6	 16
127	 20	1328.8	159.7	 16
128	 20	402.5	39.6	 16
129	 20	85.0	16.5	 16
130	 20	63.3	9.4	 16
131	 20	398.3	61.9	 16
132	 20	151.5	26.4	 16
133	 20	75.8	16.3	 16
134	 20	91.5	13.3	 16
135	 20	61.3	10.0	 16
136	 20	71.5	13.0	 16
137	 20	121.3	24.2	 16
138	 20	266.5	36.5	 16
139	 20	134.3	22.6	 16
140	 20	213.0	33.2	 16
141	 20	390.0	46.1	 16
142	 20	68.5	12.1	 16
143	 20	162.5	40.7	 16
144	 20	77.0	15.1	 16
145	 20	101.5	23.0	 16
146	 20	61.3	9.2	 16
147	 20	70.3	21.1	 16
148	 20	67.0	12.6	 16
149	 20	85.3	13.7	 16
150	 20	194.3	33.7	 16
151	 20	249.3	39.7	 16
152	 20	85.3	13.2	 16
153	 20	123.0	20.4	 16
154	 20	340.0	59.2	 16
155	 20	247.5	38.3	 16
156	 20	161.0	39.9	 16
157	 20	238.0	37.7	 16
158	 20	82.3	14.0	 16
159	 20	150.5	18.3	 16
160	 20	309.5	45.9	 16
161	 20	93.0	17.9	 20
162	 20	407.5	81.0	 16
163	 20	993.3	106.8	 16
164	 20	158.5	24.3	 16
165	 20	90.3	15.9	 16
166	 20	159.0	25.3	 16
167	 20	81.3	11.9	 12
168	 20	243.8	36.7	 16
169	 20	70.3	12.8	 16
170	 20	137.5	21.1	 16
171	 20	830.5	146.7	 16
172	 20	129.5	28.3	 16
173	 20	393.0	67.2	 16
174	 20	106.5	14.9	 16
175	 20	72.0	9.2	 16
176	 20	109.8	20.6	 16
177	 20	64.8	9.7	 16
178	 20	180.3	27.4	 16
179	 20	201.0	34.5	 16
180	 20	154.5	20.4	 16
181	 20	125.8	23.6	 16
182	 20	72.8	11.9	 16
183	 20	153.5	20.3	 16
184	 20	109.5	18.1	 16
185	 20	74.3	11.1	 16
186	 20	78.5	13.2	 16
187	 20	254.0	40.5	 16
188	 20	75.3	15.6	 16
189	 20	61.3	12.6	 16
190	 20	60.0	12.1	 16
191	 20	79.8	14.1	 16
192	 20	95.3	21.3	 16
193	 20	162.3	31.2	 16
194	 20	91.0	22.6	 16
195	 20	178.0	37.5	 16
196	 20	64.8	11.3	 16
197	 20	153.3	29.4	 16
198	 20	176.0	21.4	 16
199	 20	193.3	20.2	 16
200	 20	152.3	20.9	 16
201	 20	608.8	84.3	 16
202	 20	367.5	44.1	 16
203	 20	90.0	16.1	 16
204	 20	100.3	22.3	 16
205	 20	145.3	31.2	 16
206	 20	58.3	11.9	 16
207	 20	91.5	20.9	 16
208	 20	474.3	61.0	 16
209	 20	64.0	10.0	 16
210	 20	58.3	8.5	 16
211	 20	77.0	18.6	 16
212	 20	61.0	7.6	 16
213	 20	77.8	18.0	 16
214	 20	70.0	13.2	 16
215	 20	104.8	16.6	 16
216	 20	67.0	10.6	 16
217	 20	90.3	14.2	 16
218	 20	71.5	15.3	 16
219	 20	91.0	11.8	 16
220	 20	83.0	14.5	 16
221	 20	123.3	21.5	 16
222	 20	95.3	19.8	 16
223	 20	58.8	14.3	 16
224	 20	97.8	16.7	 16
225	 20	57.8	10.6	 16
226	 20	59.3	11.5	 16
227	 20	292.0	36.2	 16
228	 20	111.8	16.8	 16
229	 20	435.8	69.1	 16
230	 20	109.8	16.1	 16
231	 20	101.5	21.8	 16
232	 20	73.3	11.1	 16
233	 20	73.0	12.1	 16
234	 20	61.3	17.6	 16
235	 20	205.8	34.9	 16
236	 20	66.0	12.1	 16
237	 20	76.8	15.6	 16
238	 20	815.0	112.5	 16
239	 20	76.3	13.1	 16
240	 20	85.3	12.7	 16
241	 20	86.0	15.0	 16
242	 20	70.0	11.7	 16
243	 20	85.3	16.8	 16
244	 20	120.5	18.9	 16
245	 20	73.5	13.5	 16
246	 20	121.0	20.6	 16
247	 20	69.3	12.8	 16
248	 20	845.8	97.7	 16
249	 20	85.8	15.5	 16
250	 20	73.8	19.9	 16
251	 20	60.3	8.7	 16
252	 20	71.3	12.0	 16
253	 20	65.5	13.9	 16
254	 20	76.3	13.3	 16
255	 20	55.3	9.8	 16
256	 20	75.0	15.3	 12
257	 20	63.0	11.5	 16
258	 20	60.0	15.5	 16
259	 20	103.5	15.2	 16
260	 20	135.5	20.4	 16
261	 20	305.3	35.9	 16
262	 20	255.5	24.5	 16
263	 20	69.3	9.4	 16
264	 20	85.0	14.2	 16
265	 20	117.3	16.4	 16
266	 20	135.8	21.1	 16
267	 20	153.0	23.9	 16
268	 20	129.3	19.3	 16
269	 20	78.0	8.8	 16
270	 20	159.0	21.1	 16
271	 20	515.5	66.2	 16
272	 20	874.0	101.9	 16
273	 20	81.3	14.6	 16
274	 20	85.0	11.8	 16
275	 20	150.3	23.5	 16
276	 20	172.3	21.8	 16
277	 20	59.3	9.1	 16
278	 20	84.3	11.8	 16
279	 20	80.0	14.5	 16
280	 20	113.0	15.3	 16
281	 20	80.0	14.2	 16
282	 20	68.3	12.0	 16
283	 20	77.5	14.7	 16
284	 20	59.8	10.7	 16
285	 20	63.8	16.2	 16
286	 20	57.5	10.1	 16
287	 20	111.5	20.8	 16
288	 20	70.8	13.0	 16
289	 20	90.5	14.9	 16
290	 20	309.0	59.6	 16
291	 20	172.3	25.1	 16
292	 20	86.0	16.7	 16
293	 20	122.3	18.4	 16
294	 20	149.8	25.3	 16
295	 20	87.0	17.9	 16
296	 20	96.0	14.6	 16
297	 20	66.3	13.1	 16
298	 20	84.0	14.4	 16
299	 20	101.3	21.1	 16
300	 20	72.3	15.2	 16
301	 20	57.8	11.5	 16
302	 20	122.5	24.8	 16
303	 20	272.5	31.7	 20
304	 20	235.3	39.6	 16
305	 20	157.5	23.9	 16
306	 20	158.0	25.7	 16
307	 20	85.8	13.8	 16
308	 20	92.8	20.4	 16
309	 20	92.5	20.0	 16
310	 20	79.5	16.6	 16
311	 20	59.8	14.3	 16
312	 20	247.0	42.9	 16
313	 20	57.5	11.1	 16
314	 20	120.3	19.3	 16
315	 20	87.8	16.0	 16
316	 20	76.8	18.2	 16
317	 20	107.5	13.7	 16
318	 20	113.0	15.0	 16
319	 20	84.0	10.8	 16
320	 20	173.0	21.3	 16
321	 20	1218.3	133.3	 16
322	 20	194.0	33.0	 16
323	 20	223.8	84.1	 16
324	 20	161.3	24.2	 16
325	 20	65.8	10.8	 16
326	 20	191.8	36.2	 16
327	 20	74.8	16.3	 16
328	 20	60.3	10.0	 16
329	 20	57.3	9.3	 16
330	 20	63.0	8.9	 16
331	 20	72.8	10.9	 16
332	 20	61.5	11.5	 16
333	 20	167.3	23.4	 16
334	 20	166.5	33.1	 16
335	 20	1351.0	92.2	 16
336	 20	77.3	13.1	 16
337	 20	61.3	8.8	 16
338	 20	141.8	32.0	 16
339	 20	91.3	19.3	 16
340	 20	118.3	21.4	 16
341	 20	69.5	11.5	 16
342	 20	52.3	8.2	 16
343	 20	62.5	13.0	 16
344	 20	65.5	12.3	 16
345	 20	67.3	11.9	 12
346	 20	61.0	9.5	 16
347	 20	63.3	10.5	 16
348	 20	195.3	27.2	 16
349	 20	94.0	22.6	 16
350	 20	74.5	12.9	 16
351	 20	122.0	26.0	 16
352	 20	74.3	23.6	 16
353	 20	95.8	13.0	 16
354	 20	91.0	12.3	 16
355	 20	116.0	18.0	 16
356	 20	159.5	24.6	 16
357	 20	344.0	43.4	 16
358	 20	1238.8	123.5	 16
359	 20	491.3	36.8	 16
360	 20	124.0	26.8	 16
361	 20	163.3	22.8	 16
362	 20	80.3	12.3	 16
363	 20	67.3	13.8	 16
364	 20	181.0	31.7	 16
365	 20	161.5	20.5	 16
366	 20	999.8	71.0	 16
367	 20	120.3	14.9	 16
368	 20	60.8	11.1	 16
369	 20	313.8	49.6	 16
370	 20	72.5	16.1	 16
371	 20	119.8	19.9	 16
372	 20	75.5	11.9	 16
373	 20	97.8	18.0	 16
374	 20	79.5	12.4	 16
375	 20	76.8	14.0	 16
376	 20	116.3	17.6	 16
377	 20	199.3	22.2	 16
378	 20	61.0	12.4	 16
379	 20	93.8	31.2	 16
380	 20	566.0	71.5	 16
381	 20	155.5	27.1	 16
382	 20	58.0	11.4	 16
383	 20	217.0	41.7	 16
384	 20	128.3	23.9	 16
385	 20	105.3	17.8	 16
386	 20	71.8	10.1	 16
387	 20	154.0	25.4	 16
388	 20	82.3	14.5	 16
389	 20	64.5	12.5	 16
390	 20	64.0	7.3	 16
391	 20	72.5	11.0	 16
392	 20	119.8	26.7	 16
393	 20	74.5	8.7	 16
394	 20	80.3	10.6	 16
395	 20	570.0	71.7	 16
396	 20	89.3	15.6	 16
397	 20	67.8	11.1	 16
398	 20	87.5	15.8	 16
399	 20	303.3	34.1	 16
400	 20	370.8	73.4	 16
401	 20	66.3	9.9	 16
402	 20	98.5	17.0	 16
403	 20	99.0	12.9	 16
404	 20	63.5	6.8	 16
405	 20	62.8	13.1	 16
406	 20	75.0	15.4	 16
407	 20	84.8	13.7	 16
408	 20	987.3	120.8	 16
409	 20	3575.5	481.9	 16
410	 20	88.3	15.9	 16
411	 20	130.3	20.4	 16
412	 20	499.8	81.5	 16
413	 20	128.5	25.0	 16
414	 20	216.5	29.4	 16
415	 20	89.5	15.9	 16
416	 20	151.0	20.3	 16
417	 20	97.0	14.8	 16
418	 20	162.3	15.8	 16
419	 20	82.0	11.2	 16
420	 20	374.3	55.1	 16
421	 20	64.8	9.9	 16
422	 20	70.8	15.4	 16
423	 20	265.0	47.8	 16
424	 20	364.3	37.7	 16
425	 20	121.0	21.7	 16
426	 20	101.5	16.3	 16
427	 20	145.3	20.0	 16
428	 20	245.5	37.2	 16
429	 20	193.3	27.8	 16
430	 20	75.5	13.5	 16
431	 20	279.0	45.8	 16
432	 20	154.0	18.9	 16
433	 20	101.3	17.2	 16
434	 20	573.3	70.9	 12
435	 20	69.8	15.9	 16
436	 20	144.3	24.3	 16
437	 20	94.3	15.8	 16
438	 20	74.0	11.3	 16
439	 20	85.5	30.7	 16
440	 20	78.0	22.0	 16
441	 20	141.5	23.6	 16
442	 20	189.3	36.0	 16
443	 20	83.3	15.8	 16
444	 20	242.5	25.9	 16
445	 20	189.5	29.1	 16
446	 20	253.8	33.0	 20
447	 20	88.3	12.4	 16
448	 20	99.5	10.3	 16
449	 20	129.5	19.6	 16
450	 20	103.5	20.6	 16
451	 20	82.5	9.8	 16
452	 20	93.0	16.3	 16
453	 20	62.5	11.9	 16
454	 20	68.3	13.3	 16
455	 20	111.3	93.0	 16
456	 20	123.3	25.5	 16
457	 20	60.3	12.2	 16
458	 20	134.5	26.6	 16
459	 20	65.8	10.0	 16
460	 20	67.0	9.8	 16
461	 20	68.8	14.5	 16
462	 20	75.5	17.8	 16
463	 20	123.0	20.6	 16
464	 20	75.3	14.4	 16
465	 20	61.0	8.8	 16
466	 20	52.3	12.7	 16
467	 20	70.3	15.3	 16
468	 20	190.8	38.5	 16
469	 20	81.0	12.0	 16
470	 20	295.5	41.2	 16
471	 20	766.8	85.2	 16
472	 20	73.3	11.3	 16
473	 20	97.5	15.3	 16
474	 20	71.3	11.3	 16
475	 20	107.5	15.7	 16
476	 20	124.3	25.3	 16
477	 20	59.8	13.2	 16
478	 20	100.8	16.6	 16
479	 20	71.3	12.8	 16
480	 20	313.0	36.8	 16
481	 20	69.0	15.5	 16
482	 20	64.3	9.8	 16
483	 20	62.8	10.0	 16
484	 20	62.8	8.1	 16
485	 20	642.8	85.7	 16
486	 20	613.5	62.0	 16
487	 20	618.5	39.0	 16
488	 20	1007.3	92.4	 16
489	 20	218.5	23.0	 16
490	 20	83.0	17.6	 16
491	 20	285.3	38.6	 16
492	 20	75.5	9.4	 16
493	 20	153.3	18.8	 16
494	 20	160.5	18.7	 16
495	 20	91.8	17.6	 16
496	 20	458.0	61.2	 16
497	 20	105.8	24.1	 16
498	 20	225.0	30.6	 16
499	 20	79.3	13.2	 16
500	 20	58.8	12.4	 16
501	 20	91.5	14.8	 16
502	 20	81.0	13.1	 16
503	 20	97.3	15.8	 16
504	 20	164.8	24.7	 16
505	 20	110.5	23.4	 16
506	 20	94.0	15.4	 16
507	 20	230.0	29.4	 16
508	 20	79.3	12.9	 16
509	 20	445.5	74.2	 16
510	 20	100.8	16.8	 16
511	 20	243.5	32.4	 16
512	 20	65.0	13.5	 16
513	 20	57.5	12.1	 16
514	 20	82.5	12.8	 16
515	 20	67.3	18.6	 16
516	 20	92.3	17.1	 16
517	 20	151.5	18.5	 16
518	 20	67.3	15.1	 16
519	 20	60.3	11.5	 16
520	 20	52.3	7.6	 16
521	 20	64.3	21.8	 16
522	 20	61.8	11.1	 16
523	 20	284.0	42.3	 12
524	 20	72.0	12.6	 16
525	 20	86.5	14.8	 16
526	 20	130.0	75.8	 16
527	 20	85.3	14.7	 16
528	 20	206.0	40.4	 16
529	 20	676.3	84.8	 16
530	 20	188.8	30.8	 16
531	 20	352.5	40.2	 16
532	 20	138.5	18.2	 16
533	 20	75.3	9.5	 16
534	 20	82.3	14.1	 16
535	 20	74.3	13.9	 16
536	 20	81.8	15.6	 16
537	 20	120.0	18.5	 16
538	 20	75.5	15.9	 16
539	 20	106.5	25.7	 16
540	 20	107.3	22.8	 16
541	 20	82.3	15.5	 16
542	 20	84.5	10.4	 16
543	 20	184.0	37.3	 16
544	 20	68.8	10.6	 16
545	 20	82.0	8.1	 16
546	 20	81.8	13.9	 16
547	 20	92.3	20.4	 16
548	 20	64.5	8.5	 16
549	 20	109.3	19.7	 16
550	 20	86.8	13.0	 16
551	 20	93.3	19.1	 16
552	 20	61.0	11.3	 16
553	 20	161.5	22.5	 16
554	 20	66.8	14.2	 16
555	 20	60.0	10.1	 16
556	 20	91.5	16.9	 16
557	 20	133.5	15.3	 16
558	 20	63.8	12.7	 16
559	 20	280.3	38.3	 16
560	 20	157.0	24.9	 16
561	 20	63.8	8.4	 16
562	 20	143.8	20.5	 16
563	 20	94.0	14.5	 16
564	 20	97.5	12.0	 16
565	 20	63.5	15.9	 16
566	 20	206.0	34.7	 16
567	 20	80.8	13.0	 16
568	 20	756.8	150.4	 16
569	 20	72.0	12.0	 16
570	 20	57.8	12.1	 16
571	 20	138.8	23.2	 16
572	 20	107.8	18.9	 16
573	 20	73.5	12.8	 16
574	 20	107.8	20.0	 16
575	 20	88.5	15.7	 16
576	 20	411.3	78.4	 16
577	 20	87.5	17.7	 16
578	 20	92.3	12.4	 16
579	 20	163.5	30.2	 16
580	 20	661.5	55.1	 16
581	 20	783.5	51.8	 16
582	 20	104.3	14.0	 16
583	 20	145.0	23.0	 16
584	 20	78.3	12.7	 16
585	 20	94.5	16.3	 16
586	 20	545.8	65.9	 16
587	 20	331.3	52.1	 16
588	 20	83.3	11.1	 20
589	 20	67.0	10.2	 16
590	 20	380.0	64.7	 16
591	 20	115.3	16.3	 16
592	 20	130.0	22.3	 16
593	 20	112.3	16.7	 16
594	 20	61.3	11.2	 16
595	 20	117.3	17.3	 16
596	 20	70.5	13.2	 16
597	 20	482.0	91.8	 16
598	 20	75.8	14.2	 16
599	 20	174.0	23.4	 16
600	 20	194.5	30.1	 16
601	 20	178.0	21.4	 16
602	 20	759.8	41.5	 16
603	 20	244.5	29.8	 16
604	 20	96.0	20.7	 16
605	 20	99.0	18.1	 16
606	 20	162.8	29.9	 16
607	 20	293.0	40.2	 16
608	 20	803.0	59.5	 16
609	 20	128.3	19.5	 16
610	 20	84.0	12.3	 16
611	 20	62.3	12.9	 16
612	 20	65.5	9.7	 12
613	 20	66.3	14.5	 16
614	 20	74.0	11.0	 16
615	 20	323.8	56.7	 16
616	 20	397.0	66.8	 16
617	 20	328.8	62.0	 16
618	 20	187.3	32.3	 16
619	 20	86.8	17.7	 16
620	 20	64.8	14.3	 16
621	 20	74.8	20.2	 16
622	 20	103.3	13.2	 16
623	 20	73.3	10.2	 16
624	 20	76.0	15.6	 16
625	 20	99.3	13.1	 16
626	 20	100.8	23.6	 16
627	 20	64.5	11.3	 16
628	 20	72.0	12.7	 16
629	 20	143.3	16.8	 16
630	 20	86.0	13.0	 16
631	 20	175.8	21.6	 16
632	 20	175.3	26.2	 16
633	 20	117.0	11.8	 16
634	 20	140.5	28.3	 16
635	 20	135.8	19.6	 16
636	 20	342.8	50.2	 16
637	 20	79.0	12.7	 16
638	 20	110.0	14.6	 16
639	 20	155.5	25.5	 16
640	 20	216.3	39.0	 16
641	 20	2592.0	159.6	 16
642	 20	916.5	82.7	 16
643	 20	834.5	105.8	 16
644	 20	859.5	91.5	 16
645	 20	215.5	29.2	 16
646	 20	164.8	24.6	 16
647	 20	221.0	36.3	 16
648	 20	714.5	45.0	 16
649	 20	291.8	30.5	 16
650	 20	207.0	25.0	 16
651	 20	516.5	46.8	 16
652	 20	206.5	22.1	 16
653	 20	93.3	10.0	 16
654	 20	146.0	25.4	 16
655	 20	85.8	12.1	 16
656	 20	84.8	17.7	 16
657	 20	136.8	25.7	 16
658	 20	98.0	15.4	 16
659	 20	93.8	14.4	 16
660	 20	81.3	11.7	 16
661	 20	92.5	17.1	 16
662	 20	75.8	14.6	 16
663	 20	81.0	16.7	 16
664	 20	60.0	11.6	 16
665	 20	58.3	13.8	 16
666	 20	236.0	22.8	 16
667	 20	101.8	12.6	 16
668	 20	54.0	11.8	 16
669	 20	236.8	36.0	 16
670	 20	79.5	16.1	 16
671	 20	487.5	49.7	 16
672	 20	81.8	18.2	 16
673	 20	65.3	11.6	 16
674	 20	73.0	14.6	 16
675	 20	65.3	10.6	 16
676	 20	138.3	19.8	 16
677	 20	79.0	10.5	 16
678	 20	79.8	8.2	 16
679	 20	69.3	8.9	 16
680	 20	53.3	11.0	 16
681	 20	68.3	13.2	 16
682	 20	86.8	17.5	 16
683	 20	104.3	24.1	 16
684	 20	74.5	15.0	 16
685	 20	75.3	10.7	 16
686	 20	94.5	19.4	 16
687	 20	58.8	10.8	 16
688	 20	70.5	11.3	 16
689	 20	240.8	27.8	 16
690	 20	119.3	14.2	 16
691	 20	85.3	13.6	 16
692	 20	578.8	64.2	 16
693	 20	640.8	49.5	 16
694	 20	153.5	30.3	 16
695	 20	150.8	21.1	 16
696	 20	168.3	21.9	 16
697	 20	63.5	12.6	 16
698	 20	63.5	15.9	 16
699	 20	93.5	17.9	 16
700	 20	184.3	24.8	 16
701	 20	82.0	14.9	 12
702	 20	93.0	17.0	 16
703	 20	102.8	13.1	 16
704	 20	736.5	140.7	 16
705	 20	74.0	15.8	 16
706	 20	79.0	12.8	 16
707	 20	152.3	25.8	 16
708	 20	146.5	26.5	 16
709	 20	179.3	22.6	 16
710	 20	112.0	18.3	 16
711	 20	7343.5	1371.5	 16
  0	 21	138.0	28.3	 16
  1	 21	450.0	71.1	 16
  2	 21	1209.5	199.4	 16
  3	 21	158.3	18.5	 16
  4	 21	149.8	19.1	 16
  5	 21	199.5	37.8	 16
  6	 21	129.5	15.3	 16
  7	 21	338.5	53.1	 16
  8	 21	422.5	72.1	 16
  9	 21	168.0	27.4	 16
 10	 21	221.0	38.1	 16
 11	 21	140.0	31.9	 16
 12	 21	252.8	34.3	 16
 13	 21	126.3	23.9	 16
 14	 21	271.8	33.7	 16
 15	 21	3502.8	518.2	 16
 16	 21	108.5	17.9	 16
 17	 21	109.0	19.1	 16
 18	 21	126.0	16.7	 16
 19	 21	373.5	57.5	 16
 20	 21	382.5	60.1	 16
 21	 21	135.8	23.6	 16
 22	 21	400.0	51.8	 16
 23	 21	91.8	16.2	 20
 24	 21	227.8	30.8	 16
 25	 21	474.8	62.5	 16
 26	 21	67.5	11.8	 16
 27	 21	144.0	24.8	 16
 28	 21	102.3	15.3	 16
 29	 21	100.3	16.3	 16
 30	 21	669.5	60.5	 16
 31	 21	601.8	81.4	 16
 32	 21	65.0	10.4	 16
 33	 21	2148.0	375.1	 16
 34	 21	1058.0	199.6	 16
 35	 21	80.8	13.7	 16
 36	 21	74.8	13.4	 16
 37	 21	71.3	14.3	 16
 38	 21	213.3	23.5	 16
 39	 21	226.8	22.2	 16
 40	 21	502.8	74.0	 16
 41	 21	355.3	44.0	 16
 42	 21	69.8	10.6	 16
 43	 21	76.3	10.3	 16
 44	 21	80.5	13.7	 16
 45	 21	73.3	12.3	 16
 46	 21	111.3	23.5	 16
 47	 21	181.3	20.2	 16
 48	 21	215.5	33.5	 16
 49	 21	247.8	36.3	 16
 50	 21	94.3	16.0	 16
 51	 21	645.0	49.9	 16
 52	 21	673.0	98.1	 16
 53	 21	75.3	16.5	 16
 54	 21	142.8	28.8	 16
 55	 21	475.8	101.5	 16
 56	 21	485.0	71.0	 16
 57	 21	1126.5	108.7	 16
 58	 21	2416.5	333.2	 16
 59	 21	597.5	74.8	 16
 60	 21	87.5	17.2	 16
 61	 21	170.3	27.8	 16
 62	 21	114.5	25.8	 16
 63	 21	737.3	80.3	 16
 64	 21	71.3	12.7	 16
 65	 21	81.0	14.6	 16
 66	 21	124.8	15.6	 16
 67	 21	81.3	16.1	 16
 68	 21	154.8	24.7	 16
 69	 21	512.5	62.6	 16
 70	 21	2539.8	231.5	 16
 71	 21	65.3	8.1	 16
 72	 21	110.3	15.0	 16
 73	 21	8040.3	924.6	 16
 74	 21	2107.5	253.5	 16
 75	 21	671.5	96.2	 16
 76	 21	126.8	20.8	 16
 77	 21	164.0	27.8	 16
 78	 21	196.0	31.3	 16
 79	 21	113.8	27.6	 16
 80	 21	204.3	42.4	 16
 81	 21	105.0	13.6	 16
 82	 21	114.3	11.8	 16
 83	 21	917.5	62.5	 16
 84	 21	2687.8	183.7	 16
 85	 21	182.3	39.6	 16
 86	 21	179.3	26.1	 16
 87	 21	201.0	21.7	 16
 88	 21	287.5	43.4	 16
 89	 21	120.5	18.3	 16
 90	 21	132.3	19.0	 16
 91	 21	218.8	33.1	 16
 92	 21	293.3	33.6	 16
 93	 21	569.3	67.0	 16
 94	 21	2548.3	217.3	 16
 95	 21	2744.8	114.3	 16
 96	 21	148.0	19.1	 16
 97	 21	192.0	27.2	 16
 98	 21	122.8	15.3	 16
 99	 21	78.0	15.9	 16
100	 21	153.5	24.7	 16
101	 21	457.5	48.9	 16
102	 21	104.8	18.5	 16
103	 21	76.0	15.0	 16
104	 21	124.5	23.3	 16
105	 21	170.5	23.9	 16
106	 21	163.8	41.5	 16
107	 21	830.3	81.4	 16
108	 21	65.0	10.7	 16
109	 21	335.5	38.1	 16
110	 21	174.8	25.4	 16
111	 21	86.3	14.0	 16
112	 21	3307.3	218.2	 16
113	 21	122.3	18.3	 16
114	 21	70.5	16.0	 16
115	 21	73.5	12.1	 16
116	 21	279.0	51.7	 16
117	 21	101.3	19.8	 16
118	 21	311.5	49.1	 16
119	 21	72.0	14.9	 16
120	 21	120.5	12.8	 16
121	 21	3993.8	401.5	 16
122	 21	2655.5	270.4	 16
123	 21	214.0	17.0	 16
124	 21	401.5	58.1	 16
125	 21	366.0	47.9	 16
126	 21	154.3	16.4	 16
127	 21	81.8	13.5	 16
128	 21	91.8	20.0	 16
129	 21	191.5	26.6	 16
130	 21	135.8	18.8	 16
131	 21	77.0	11.5	 16
132	 21	202.0	31.9	 16
133	 21	500.5	52.3	 16
134	 21	137.8	19.1	 16
135	 21	101.8	16.9	 16
136	 21	296.8	41.6	 16
137	 21	384.5	41.4	 16
138	 21	125.5	17.7	 16
139	 21	762.8	58.4	 16
140	 21	183.8	38.4	 16
141	 21	94.8	18.3	 16
142	 21	400.0	48.6	 16
143	 21	87.8	14.8	 16
144	 21	257.5	45.6	 16
145	 21	102.0	15.5	 16
146	 21	78.5	14.2	 16
147	 21	209.8	36.5	 16
148	 21	96.3	20.3	 16
149	 21	257.5	52.5	 16
150	 21	92.3	17.5	 16
151	 21	168.5	27.4	 16
152	 21	948.5	50.5	 16
153	 21	122.8	25.2	 16
154	 21	209.0	22.5	 16
155	 21	248.0	39.9	 16
156	 21	211.5	31.5	 16
157	 21	647.8	45.7	 16
158	 21	195.0	27.0	 16
159	 21	74.3	15.6	 16
160	 21	2040.8	276.0	 16
161	 21	136.3	13.4	 16
162	 21	1324.3	175.1	 16
163	 21	116.5	16.5	 16
164	 21	327.0	38.4	 16
165	 21	79.5	16.3	 20
166	 21	72.5	11.8	 16
167	 21	235.3	34.0	 16
168	 21	97.8	15.3	 16
169	 21	292.8	36.1	 16
170	 21	88.3	18.1	 16
171	 21	248.8	40.8	 16
172	 21	382.3	60.1	 16
173	 21	280.3	28.6	 16
174	 21	109.3	15.8	 16
175	 21	262.0	27.6	 16
176	 21	109.3	12.5	 16
177	 21	82.0	15.3	 16
178	 21	121.0	19.0	 16
179	 21	627.0	76.4	 16
180	 21	221.0	30.2	 16
181	 21	74.0	13.5	 16
182	 21	317.5	54.3	 16
183	 21	67.0	10.8	 16
184	 21	103.3	24.6	 16
185	 21	65.8	9.3	 16
186	 21	65.0	11.1	 16
187	 21	72.3	24.8	 16
188	 21	63.8	14.2	 16
189	 21	1555.3	222.3	 16
190	 21	150.3	16.9	 16
191	 21	639.3	60.3	 16
192	 21	144.0	26.1	 16
193	 21	113.8	16.9	 16
194	 21	315.5	36.1	 16
195	 21	76.0	15.7	 16
196	 21	942.3	92.9	 16
197	 21	74.8	15.1	 16
198	 21	114.3	37.9	 16
199	 21	383.3	42.8	 16
200	 21	392.3	43.8	 16
201	 21	132.5	21.6	 16
202	 21	107.8	23.0	 16
203	 21	361.0	50.5	 16
204	 21	62.0	11.1	 16
205	 21	159.0	32.1	 16
206	 21	98.8	19.2	 16
207	 21	71.8	11.5	 16
208	 21	409.5	40.6	 16
209	 21	92.8	13.4	 16
210	 21	118.8	19.6	 16
211	 21	55.8	14.2	 16
212	 21	67.3	10.7	 16
213	 21	87.3	13.0	 16
214	 21	128.8	22.8	 16
215	 21	495.0	50.0	 16
216	 21	146.0	22.8	 16
217	 21	86.0	13.8	 16
218	 21	483.5	56.4	 16
219	 21	218.5	28.6	 16
220	 21	549.0	59.1	 16
221	 21	303.8	38.5	 16
222	 21	71.3	9.0	 16
223	 21	58.0	7.8	 16
224	 21	294.8	28.0	 16
225	 21	68.8	9.9	 16
226	 21	56.5	10.3	 16
227	 21	2265.5	206.5	 16
228	 21	75.0	12.0	 16
229	 21	732.8	60.2	 16
230	 21	1013.5	85.2	 16
231	 21	961.5	149.6	 16
232	 21	1164.3	148.7	 16
233	 21	88.3	12.6	 16
234	 21	168.3	28.2	 16
235	 21	346.8	42.4	 16
236	 21	69.8	9.9	 16
237	 21	68.0	11.2	 16
238	 21	59.3	10.4	 16
239	 21	171.0	24.8	 16
240	 21	80.3	12.4	 16
241	 21	159.3	17.9	 16
242	 21	63.5	17.0	 16
243	 21	906.0	81.6	 16
244	 21	103.0	19.2	 16
245	 21	338.8	51.6	 16
246	 21	702.3	64.9	 16
247	 21	221.5	20.5	 16
248	 21	235.3	26.0	 16
249	 21	251.3	21.5	 16
250	 21	82.5	17.7	 16
251	 21	78.5	14.0	 16
252	 21	69.0	15.5	 16
253	 21	66.0	12.5	 16
254	 21	78.8	13.5	 16
255	 21	116.3	20.9	 16
256	 21	134.0	20.7	 16
257	 21	335.3	38.3	 16
258	 21	187.8	27.3	 16
259	 21	110.0	20.9	 16
260	 21	74.3	13.0	 16
261	 21	79.5	11.4	 16
262	 21	1321.8	102.7	 16
263	 21	7822.8	592.8	 16
264	 21	71.5	12.4	 16
265	 21	85.3	13.2	 16
266	 21	166.0	19.3	 16
267	 21	165.0	21.4	 16
268	 21	100.3	12.8	 16
269	 21	468.5	34.3	 16
270	 21	993.3	102.8	 16
271	 21	92.0	15.7	 16
272	 21	84.3	15.1	 16
273	 21	78.0	14.5	 16
274	 21	174.8	25.1	 16
275	 21	989.5	118.8	 16
276	 21	415.0	64.9	 16
277	 21	78.3	16.0	 16
278	 21	280.5	44.7	 16
279	 21	747.8	91.2	 16
280	 21	122.3	18.3	 16
281	 21	314.0	46.4	 16
282	 21	83.5	17.4	 16
283	 21	343.0	43.2	 16
284	 21	57.3	10.3	 16
285	 21	55.0	9.5	 16
286	 21	162.3	28.6	 16
287	 21	269.0	38.3	 16
288	 21	1325.3	133.5	 16
289	 21	117.0	13.3	 16
290	 21	115.8	26.7	 16
291	 21	221.3	29.5	 16
292	 21	94.0	21.0	 16
293	 21	352.8	40.9	 16
294	 21	505.3	60.9	 16
295	 21	89.0	16.9	 16
296	 21	224.8	27.4	 16
297	 21	71.0	14.7	 16
298	 21	70.5	10.6	 16
299	 21	143.3	25.0	 16
300	 21	132.8	21.9	 16
301	 21	143.5	20.0	 16
302	 21	369.0	44.2	 16
303	 21	1006.3	90.3	 16
304	 21	872.5	79.8	 16
305	 21	3920.5	647.9	 16
306	 21	159.5	30.9	 16
307	 21	76.3	20.9	 16
308	 21	64.3	11.3	 20
309	 21	174.0	26.4	 16
310	 21	182.3	30.8	 16
311	 21	451.5	71.2	 16
312	 21	78.0	14.3	 16
313	 21	490.5	62.9	 16
314	 21	74.8	12.6	 16
315	 21	64.0	10.4	 16
316	 21	103.3	9.9	 16
317	 21	769.3	92.0	 16
318	 21	2444.8	244.2	 16
319	 21	107.3	20.3	 16
320	 21	203.5	23.3	 16
321	 21	2263.5	186.1	 16
322	 21	7137.8	748.4	 16
323	 21	1171.5	174.8	 16
324	 21	77.5	13.4	 16
325	 21	97.3	16.2	 16
326	 21	547.0	86.1	 16
327	 21	187.8	38.0	 16
328	 21	76.0	9.5	 16
329	 21	355.3	52.7	 16
330	 21	66.0	8.9	 16
331	 21	139.3	19.2	 16
332	 21	738.0	74.3	 16
333	 21	258.3	22.7	 16
334	 21	232.5	22.1	 16
335	 21	285.8	35.8	 16
336	 21	65.8	12.8	 16
337	 21	127.0	17.7	 16
338	 21	217.3	37.0	 16
339	 21	77.8	13.1	 16
340	 21	303.8	35.4	 16
341	 21	1859.3	216.1	 16
342	 21	83.8	13.8	 16
343	 21	84.8	17.7	 16
344	 21	151.8	19.3	 16
345	 21	88.5	19.7	 16
346	 21	146.3	21.4	 16
347	 21	97.5	32.5	 16
348	 21	2906.5	263.9	 16
349	 21	3306.3	319.5	 16
350	 21	324.0	48.4	 16
351	 21	251.0	40.3	 16
352	 21	187.3	26.2	 16
353	 21	144.0	20.2	 16
354	 21	109.3	15.0	 16
355	 21	7549.0	652.4	 16
356	 21	231.0	31.4	 16
357	 21	769.5	68.2	 16
358	 21	320.8	30.1	 16
359	 21	961.0	90.6	 16
360	 21	578.3	38.3	 16
361	 21	1041.8	84.6	 16
362	 21	82.3	15.0	 16
363	 21	303.0	47.7	 16
364	 21	69.3	11.2	 16
365	 21	139.5	20.3	 16
366	 21	453.5	56.7	 16
367	 21	613.5	57.4	 16
368	 21	135.0	17.6	 16
369	 21	763.8	73.4	 16
370	 21	304.8	36.8	 16
371	 21	340.0	34.6	 16
372	 21	302.5	23.6	 16
373	 21	73.8	15.5	 16
374	 21	115.8	12.5	 16
375	 21	496.3	48.5	 16
376	 21	81.0	13.6	 16
377	 21	153.8	26.2	 16
378	 21	114.3	20.2	 16
379	 21	75.3	11.8	 16
380	 21	73.8	14.8	 16
381	 21	74.0	10.4	 16
382	 21	150.3	21.0	 16
383	 21	185.0	33.3	 16
384	 21	62.3	14.5	 16
385	 21	88.0	15.8	 16
386	 21	93.5	14.1	 16
387	 21	227.5	31.5	 16
388	 21	86.5	19.8	 16
389	 21	155.8	23.9	 16
390	 21	69.5	10.0	 16
391	 21	60.5	8.4	 16
392	 21	2002.3	272.6	 16
393	 21	2474.8	175.2	 16
394	 21	71.3	11.7	 16
395	 21	96.5	18.6	 16
396	 21	830.5	85.0	 16
397	 21	7245.3	765.5	 16
398	 21	216.5	23.4	 16
399	 21	162.8	26.4	 16
400	 21	309.0	41.6	 16
401	 21	154.5	29.6	 16
402	 21	67.8	15.4	 16
403	 21	251.8	26.9	 16
404	 21	170.3	31.7	 16
405	 21	79.5	13.9	 16
406	 21	739.3	90.4	 16
407	 21	407.0	32.0	 16
408	 21	111.3	16.8	 16
409	 21	59.0	7.8	 16
410	 21	85.0	14.1	 16
411	 21	71.0	14.5	 16
412	 21	2506.5	317.6	 16
413	 21	109.3	19.7	 16
414	 21	1270.0	204.3	 16
415	 21	251.3	28.2	 16
416	 21	150.8	23.9	 16
417	 21	115.0	19.6	 16
418	 21	318.5	46.0	 16
419	 21	405.3	45.6	 16
420	 21	67.8	11.1	 16
421	 21	161.8	25.4	 16
422	 21	125.5	23.4	 16
423	 21	154.0	23.1	 16
424	 21	1301.0	150.0	 16
425	 21	436.5	60.7	 16
426	 21	211.5	31.7	 16
427	 21	145.8	20.5	 16
428	 21	154.0	27.2	 16
429	 21	150.8	16.8	 16
430	 21	426.8	72.8	 16
431	 21	129.5	12.3	 16
432	 21	270.0	36.1	 16
433	 21	374.5	30.7	 16
434	 21	341.0	41.7	 16
435	 21	300.0	17.5	 16
436	 21	110.3	21.3	 16
437	 21	110.3	16.2	 16
438	 21	1219.5	111.6	 16
439	 21	81.3	12.6	 16
440	 21	141.8	19.0	 16
441	 21	198.5	30.2	 16
442	 21	96.8	16.7	 16
443	 21	97.8	11.5	 16
444	 21	110.8	21.3	 16
445	 21	60.3	11.9	 16
446	 21	140.3	26.0	 16
447	 21	116.0	23.0	 16
448	 21	275.5	36.7	 16
449	 21	5442.8	650.0	 16
450	 21	287.3	28.8	 20
451	 21	251.3	40.4	 16
452	 21	162.0	23.7	 16
453	 21	75.0	16.5	 16
454	 21	294.3	51.5	 16
455	 21	103.0	14.8	 16
456	 21	493.5	84.6	 16
457	 21	121.0	19.9	 16
458	 21	416.0	53.1	 16
459	 21	175.0	21.2	 16
460	 21	697.5	119.4	 16
461	 21	257.5	25.5	 16
462	 21	727.5	99.2	 16
463	 21	1109.5	166.7	 16
464	 21	136.8	25.2	 16
465	 21	261.0	38.8	 16
466	 21	285.0	49.7	 16
467	 21	687.0	98.1	 16
468	 21	186.3	30.7	 16
469	 21	172.0	23.8	 16
470	 21	142.5	22.2	 16
471	 21	172.5	27.9	 16
472	 21	79.5	13.7	 16
473	 21	362.3	46.3	 16
474	 21	74.3	12.5	 16
475	 21	99.3	19.1	 16
476	 21	576.0	46.2	 16
477	 21	1534.5	153.0	 16
478	 21	362.3	32.2	 16
479	 21	151.5	29.3	 16
480	 21	82.3	11.3	 16
481	 21	79.3	15.9	 16
482	 21	120.0	17.2	 16
483	 21	91.0	15.1	 16
484	 21	73.3	11.3	 16
485	 21	107.8	15.1	 16
486	 21	110.3	20.3	 16
487	 21	346.0	34.7	 16
488	 21	123.3	18.3	 16
489	 21	84.0	10.8	 16
490	 21	622.3	38.4	 16
491	 21	655.3	67.3	 16
492	 21	396.5	56.4	 16
493	 21	122.3	18.8	 16
494	 21	233.5	25.9	 16
495	 21	84.8	14.9	 16
496	 21	169.8	29.9	 16
497	 21	70.5	8.5	 16
498	 21	164.5	21.1	 16
499	 21	154.8	16.0	 16
500	 21	187.5	28.0	 16
501	 21	702.8	90.9	 16
502	 21	210.8	30.3	 16
503	 21	129.3	24.3	 16
504	 21	123.0	18.8	 16
505	 21	1362.3	102.0	 16
506	 21	80.3	13.2	 16
507	 21	1450.3	135.4	 16
508	 21	237.0	41.8	 16
509	 21	101.8	15.6	 16
510	 21	114.3	19.1	 16
511	 21	5486.8	224.8	 16
512	 21	120.3	38.0	 16
513	 21	78.0	16.1	 16
514	 21	86.5	14.6	 16
515	 21	728.5	59.7	 16
516	 21	662.8	82.6	 16
517	 21	91.0	11.2	 16
518	 21	295.3	49.7	 16
519	 21	65.3	15.2	 16
520	 21	231.8	30.8	 16
521	 21	470.3	60.4	 16
522	 21	530.5	36.6	 16
523	 21	198.8	31.1	 16
524	 21	60.5	13.3	 16
525	 21	107.5	22.1	 16
526	 21	72.0	13.9	 16
527	 21	301.3	36.2	 16
528	 21	325.0	52.4	 16
529	 21	488.3	47.3	 16
530	 21	302.8	29.7	 16
531	 21	111.8	23.1	 16
532	 21	1307.5	124.2	 16
533	 21	89.0	12.2	 16
534	 21	108.5	22.4	 16
535	 21	535.3	59.1	 16
536	 21	98.5	18.3	 16
537	 21	192.3	29.1	 16
538	 21	85.3	17.4	 16
539	 21	116.3	20.7	 16
540	 21	67.3	11.2	 16
541	 21	116.3	25.6	 16
542	 21	56.3	6.6	 16
543	 21	518.8	59.3	 16
544	 21	157.8	29.4	 16
545	 21	959.0	111.8	 16
546	 21	1093.8	91.0	 16
547	 21	128.3	24.9	 16
548	 21	285.3	35.9	 16
549	 21	100.3	14.9	 16
550	 21	180.0	25.2	 16
551	 21	99.5	11.1	 16
552	 21	212.3	24.9	 16
553	 21	114.5	18.7	 16
554	 21	60.5	8.7	 16
555	 21	64.5	12.4	 16
556	 21	64.8	26.7	 16
557	 21	92.8	12.7	 16
558	 21	65.0	9.8	 16
559	 21	79.0	10.4	 16
560	 21	105.5	17.4	 16
561	 21	198.8	26.7	 16
562	 21	221.0	29.7	 16
563	 21	364.5	47.0	 16
564	 21	313.5	30.2	 16
565	 21	81.5	9.3	 16
566	 21	350.0	60.9	 16
567	 21	62.3	11.5	 16
568	 21	690.0	119.5	 16
569	 21	218.3	27.3	 16
570	 21	61.0	12.0	 16
571	 21	120.0	18.8	 16
572	 21	116.0	23.4	 16
573	 21	100.3	15.9	 16
574	 21	549.3	88.1	 16
575	 21	154.3	17.4	 16
576	 21	356.3	44.5	 16
577	 21	195.0	21.5	 16
578	 21	252.5	37.4	 16
579	 21	248.5	35.1	 16
580	 21	268.5	32.9	 16
581	 21	77.8	10.4	 16
582	 21	85.3	13.8	 16
583	 21	6685.5	1102.0	 16
584	 21	168.3	29.6	 16
585	 21	1232.8	202.6	 16
586	 21	319.8	42.2	 16
587	 21	80.0	13.7	 16
588	 21	130.8	42.1	 16
589	 21	150.3	35.0	 16
590	 21	147.8	23.4	 16
591	 21	752.5	126.8	 16
592	 21	606.3	84.7	 20
593	 21	195.5	35.1	 16
594	 21	134.0	24.1	 16
595	 21	122.5	21.3	 16
596	 21	149.3	22.0	 16
597	 21	85.0	23.2	 16
598	 21	148.5	20.2	 16
599	 21	356.8	62.7	 16
600	 21	92.3	18.7	 16
601	 21	89.0	17.9	 16
602	 21	1324.0	80.6	 16
603	 21	161.5	19.3	 16
604	 21	136.5	18.2	 16
605	 21	124.8	18.9	 16
606	 21	129.0	23.6	 16
607	 21	165.3	30.9	 16
608	 21	183.5	29.8	 16
609	 21	1201.3	144.8	 16
610	 21	145.3	25.3	 16
611	 21	84.8	12.6	 16
612	 21	208.8	23.1	 16
613	 21	416.0	41.2	 16
614	 21	191.8	37.2	 16
615	 21	221.0	43.0	 16
616	 21	367.0	46.4	 16
617	 21	215.3	26.9	 16
618	 21	69.5	13.7	 16
619	 21	591.0	65.8	 16
620	 21	141.8	19.9	 16
621	 21	234.8	108.0	 16
622	 21	74.5	9.4	 16
623	 21	205.5	34.6	 16
624	 21	136.8	19.5	 16
625	 21	115.8	24.0	 16
626	 21	376.5	58.0	 16
627	 21	96.5	13.5	 16
628	 21	84.3	7.6	 16
629	 21	85.0	13.3	 16
630	 21	150.8	17.5	 16
631	 21	112.0	21.5	 16
632	 21	1078.3	85.3	 16
633	 21	119.5	19.2	 16
634	 21	86.3	11.6	 16
635	 21	1761.8	196.3	 16
636	 21	142.3	24.7	 16
637	 21	98.8	9.6	 16
638	 21	2023.8	200.2	 16
639	 21	103.0	13.7	 16
640	 21	92.8	15.4	 16
641	 21	433.3	53.9	 16
642	 21	102.0	15.5	 16
643	 21	66.5	10.8	 16
644	 21	85.0	14.7	 16
645	 21	85.3	17.3	 16
646	 21	126.8	13.7	 16
647	 21	125.8	16.6	 16
648	 21	292.8	34.7	 16
649	 21	308.3	26.8	 16
650	 21	183.0	29.3	 16
651	 21	200.3	36.4	 16
652	 21	290.5	37.2	 16
653	 21	360.8	62.0	 16
654	 21	111.8	20.7	 16
655	 21	316.8	38.5	 16
656	 21	5729.3	659.9	 16
657	 21	12616.0	1167.9	 16
658	 21	185.8	22.7	 16
659	 21	88.3	15.2	 16
660	 21	729.3	79.8	 16
661	 21	114.3	16.9	 16
662	 21	2483.8	206.0	 16
663	 21	86.5	17.0	 16
664	 21	1046.3	106.2	 16
665	 21	60.0	10.4	 16
666	 21	94.3	13.9	 16
667	 21	60.3	11.4	 16
668	 21	112.0	19.9	 16
669	 21	61.8	9.1	 16
670	 21	63.3	13.7	 16
671	 21	770.3	104.0	 16
672	 21	126.3	19.6	 16
673	 21	429.0	58.6	 16
674	 21	467.8	51.5	 16
675	 21	437.3	47.7	 16
676	 21	531.3	43.5	 16
677	 21	126.0	21.0	 16
678	 21	109.3	19.4	 16
679	 21	340.3	61.1	 16
680	 21	96.3	13.5	 16
681	 21	89.8	17.1	 16
682	 21	476.3	56.9	 16
683	 21	61.5	13.9	 16
684	 21	62.0	10.8	 16
685	 21	108.3	43.9	 16
686	 21	78.3	17.6	 16
687	 21	264.8	27.2	 16
688	 21	229.3	28.7	 16
689	 21	1842.0	183.9	 16
690	 21	1417.8	294.7	 16
691	 21	216.5	31.7	 16
692	 21	86.0	12.2	 16
693	 21	517.3	48.1	 16
694	 21	251.0	30.4	 16
695	 21	130.3	24.1	 16
696	 21	167.0	29.2	 16
697	 21	208.3	31.5	 16
698	 21	483.8	87.3	 16
699	 21	70.8	13.8	 16
700	 21	1829.8	255.9	 16
701	 21	128.3	17.8	 16
702	 21	80.0	12.0	 16
703	 21	106.3	20.2	 16
704	 21	143.5	27.1	 16
705	 21	162.3	25.2	 16
706	 21	465.0	50.7	 16
707	 21	262.5	29.1	 16
708	 21	132.3	17.7	 16
709	 21	223.5	31.2	 16
710	 21	437.5	35.8	 16
711	 21	109.5	21.2	 16
  0	 22	10507.5	1456.4	 16
  1	 22	496.3	61.5	 16
  2	 22	130.0	23.1	 16
  3	 22	119.5	20.2	 16
  4	 22	132.3	14.9	 16
  5	 22	100.8	18.0	 16
  6	 22	97.0	14.9	 16
  7	 22	208.3	36.7	 16
  8	 22	225.8	29.5	 16
  9	 22	145.3	18.6	 16
 10	 22	289.5	48.8	 16
 11	 22	153.5	21.8	 16
 12	 22	107.0	17.1	 16
 13	 22	86.0	11.1	 16
 14	 22	195.5	36.6	 16
 15	 22	326.8	59.8	 16
 16	 22	96.3	18.7	 16
 17	 22	219.8	29.0	 16
 18	 22	164.5	32.4	 16
 19	 22	136.8	17.5	 16
 20	 22	82.5	18.3	 16
 21	 22	126.0	23.2	 16
 22	 22	167.5	21.9	 16
 23	 22	84.3	19.4	 16
 24	 22	88.3	14.0	 16
 25	 22	107.5	15.4	 16
 26	 22	75.0	11.7	 16
 27	 22	98.8	15.4	 20
 28	 22	82.0	13.7	 16
 29	 22	62.3	11.6	 16
 30	 22	367.3	38.3	 16
 31	 22	240.8	39.0	 16
 32	 22	76.0	14.4	 16
 33	 22	159.8	24.5	 16
 34	 22	122.5	26.4	 16
 35	 22	67.3	13.4	 16
 36	 22	74.3	11.9	 16
 37	 22	78.0	15.8	 16
 38	 22	132.5	20.8	 16
 39	 22	356.5	62.4	 16
 40	 22	174.8	26.7	 16
 41	 22	215.0	27.4	 16
 42	 22	70.8	9.0	 16
 43	 22	73.0	9.6	 16
 44	 22	66.8	10.4	 16
 45	 22	74.3	12.8	 16
 46	 22	109.0	19.6	 16
 47	 22	82.8	15.3	 16
 48	 22	105.8	16.3	 16
 49	 22	96.8	16.5	 16
 50	 22	72.5	12.1	 16
 51	 22	168.8	32.2	 16
 52	 22	154.3	20.1	 16
 53	 22	68.0	15.6	 16
 54	 22	93.3	18.4	 16
 55	 22	78.8	11.5	 16
 56	 22	135.5	20.1	 16
 57	 22	483.3	87.9	 16
 58	 22	156.3	20.4	 16
 59	 22	161.3	24.8	 16
 60	 22	89.8	19.1	 16
 61	 22	81.0	14.6	 16
 62	 22	86.3	17.6	 16
 63	 22	251.0	32.5	 16
 64	 22	108.5	18.1	 16
 65	 22	100.5	16.6	 16
 66	 22	123.3	19.4	 16
 67	 22	82.5	16.2	 16
 68	 22	344.0	39.6	 16
 69	 22	507.3	40.7	 16
 70	 22	1592.8	237.9	 16
 71	 22	72.8	11.8	 16
 72	 22	75.8	10.1	 16
 73	 22	1415.5	164.4	 16
 74	 22	250.3	29.8	 16
 75	 22	131.3	31.7	 16
 76	 22	77.5	15.1	 16
 77	 22	105.3	16.0	 16
 78	 22	185.0	29.8	 16
 79	 22	80.3	16.6	 16
 80	 22	107.3	18.9	 16
 81	 22	232.3	42.2	 16
 82	 22	161.8	25.0	 16
 83	 22	210.0	26.9	 16
 84	 22	390.0	60.1	 16
 85	 22	137.5	22.3	 16
 86	 22	99.3	12.2	 16
 87	 22	150.3	22.1	 16
 88	 22	73.0	17.8	 16
 89	 22	163.3	19.1	 16
 90	 22	64.0	8.8	 16
 91	 22	361.3	35.6	 16
 92	 22	465.5	35.3	 16
 93	 22	111.3	22.2	 16
 94	 22	659.5	89.2	 16
 95	 22	804.0	69.3	 16
 96	 22	116.8	19.8	 16
 97	 22	190.5	29.3	 16
 98	 22	85.0	18.1	 16
 99	 22	63.0	11.7	 16
100	 22	72.8	10.8	 16
101	 22	76.3	10.3	 16
102	 22	77.5	9.6	 16
103	 22	59.5	14.5	 16
104	 22	108.0	13.3	 16
105	 22	310.8	38.2	 16
106	 22	304.5	35.6	 16
107	 22	75.3	25.3	 16
108	 22	61.8	10.4	 16
109	 22	242.5	24.4	 16
110	 22	82.3	16.4	 16
111	 22	78.0	10.7	 16
112	 22	283.8	44.1	 16
113	 22	86.3	12.2	 16
114	 22	82.8	16.8	 16
115	 22	86.5	16.4	 16
116	 22	75.8	14.8	 16
117	 22	69.0	10.0	 16
118	 22	77.3	14.8	 16
119	 22	69.5	14.5	 16
120	 22	237.0	34.9	 16
121	 22	534.5	66.2	 16
122	 22	141.5	33.0	 16
123	 22	156.0	28.5	 16
124	 22	94.5	14.2	 16
125	 22	94.3	22.4	 16
126	 22	219.5	38.9	 16
127	 22	78.3	15.2	 16
128	 22	65.5	15.7	 16
129	 22	381.0	29.7	 16
130	 22	96.5	19.0	 16
131	 22	82.0	21.9	 16
132	 22	94.0	10.1	 16
133	 22	226.3	25.3	 16
134	 22	93.0	16.6	 16
135	 22	102.0	11.8	 16
136	 22	152.0	22.4	 16
137	 22	229.3	34.6	 16
138	 22	103.5	13.4	 16
139	 22	126.0	18.9	 16
140	 22	118.8	19.8	 16
141	 22	82.0	49.7	 16
142	 22	96.3	14.8	 16
143	 22	68.5	16.3	 16
144	 22	181.5	11.9	 16
145	 22	110.3	17.5	 16
146	 22	59.8	16.3	 16
147	 22	73.3	20.9	 16
148	 22	70.5	10.4	 16
149	 22	77.5	13.6	 16
150	 22	82.5	13.4	 16
151	 22	87.0	13.2	 16
152	 22	680.5	80.3	 16
153	 22	115.5	20.3	 16
154	 22	81.0	12.9	 16
155	 22	93.5	18.7	 16
156	 22	156.0	23.0	 16
157	 22	137.5	22.8	 16
158	 22	104.3	15.4	 16
159	 22	90.3	14.1	 16
160	 22	642.0	96.7	 16
161	 22	78.3	12.4	 16
162	 22	272.3	33.8	 16
163	 22	75.3	12.3	 16
164	 22	78.8	12.0	 16
165	 22	56.8	12.7	 16
166	 22	65.8	15.6	 16
167	 22	222.3	26.7	 16
168	 22	95.5	14.2	 16
169	 22	69.8	9.6	 16
170	 22	93.3	19.1	 20
171	 22	154.8	25.4	 16
172	 22	122.8	26.8	 16
173	 22	210.5	24.2	 16
174	 22	129.0	25.5	 16
175	 22	70.8	12.5	 16
176	 22	177.8	28.3	 16
177	 22	94.8	14.2	 16
178	 22	99.5	17.4	 16
179	 22	83.8	14.7	 16
180	 22	143.8	16.3	 16
181	 22	70.0	14.9	 16
182	 22	97.3	13.8	 16
183	 22	66.5	13.7	 16
184	 22	71.5	12.1	 16
185	 22	66.5	9.8	 16
186	 22	62.5	16.7	 16
187	 22	70.8	13.7	 16
188	 22	65.3	12.3	 16
189	 22	304.5	51.2	 16
190	 22	77.0	26.1	 16
191	 22	156.0	28.3	 16
192	 22	83.3	16.6	 16
193	 22	102.5	13.2	 16
194	 22	94.3	13.4	 16
195	 22	58.0	9.9	 16
196	 22	242.5	47.7	 16
197	 22	68.0	16.3	 16
198	 22	78.3	11.9	 16
199	 22	417.0	61.3	 16
200	 22	78.3	11.1	 16
201	 22	81.5	18.1	 16
202	 22	66.5	10.2	 16
203	 22	57.5	8.7	 16
204	 22	64.5	15.3	 16
205	 22	74.0	15.6	 16
206	 22	80.5	22.6	 16
207	 22	89.0	14.8	 16
208	 22	183.8	27.1	 16
209	 22	105.3	16.0	 16
210	 22	288.0	31.4	 16
211	 22	62.0	12.4	 16
212	 22	64.5	10.8	 16
213	 22	67.3	12.6	 16
214	 22	64.5	11.9	 16
215	 22	99.8	22.4	 16
216	 22	328.8	53.5	 16
217	 22	70.0	12.5	 16
218	 22	71.8	17.6	 16
219	 22	133.5	23.9	 16
220	 22	140.5	21.8	 16
221	 22	130.5	29.2	 16
222	 22	60.0	10.4	 16
223	 22	51.8	7.8	 16
224	 22	77.8	12.0	 16
225	 22	52.5	11.1	 16
226	 22	62.0	10.6	 16
227	 22	433.5	59.5	 16
228	 22	110.3	16.2	 16
229	 22	385.8	43.4	 16
230	 22	201.8	28.7	 16
231	 22	85.3	18.7	 16
232	 22	96.3	19.9	 16
233	 22	75.3	10.9	 16
234	 22	260.8	33.9	 16
235	 22	176.5	39.0	 16
236	 22	69.3	9.8	 16
237	 22	66.8	11.0	 16
238	 22	62.3	12.5	 16
239	 22	91.0	22.3	 16
240	 22	72.3	12.0	 16
241	 22	104.3	20.7	 16
242	 22	71.3	17.5	 16
243	 22	307.8	30.6	 16
244	 22	145.5	19.3	 16
245	 22	170.5	25.5	 16
246	 22	325.5	35.2	 16
247	 22	88.0	14.5	 16
248	 22	338.3	25.4	 16
249	 22	169.5	31.9	 16
250	 22	75.0	11.7	 16
251	 22	61.0	12.1	 16
252	 22	59.0	10.5	 16
253	 22	59.0	13.3	 16
254	 22	75.5	15.5	 16
255	 22	104.3	17.2	 16
256	 22	129.0	19.4	 16
257	 22	112.0	14.6	 16
258	 22	126.0	23.3	 16
259	 22	90.0	15.3	 16
260	 22	78.3	16.4	 16
261	 22	118.5	21.6	 16
262	 22	394.3	52.4	 16
263	 22	1876.3	246.9	 16
264	 22	60.0	9.1	 16
265	 22	82.3	13.3	 16
266	 22	144.5	19.4	 16
267	 22	239.0	31.9	 16
268	 22	175.0	29.9	 16
269	 22	167.8	25.1	 16
270	 22	114.0	16.6	 16
271	 22	67.3	13.9	 16
272	 22	63.8	13.3	 16
273	 22	64.3	8.4	 16
274	 22	129.0	19.2	 16
275	 22	148.3	17.4	 16
276	 22	132.3	22.2	 16
277	 22	76.8	14.6	 16
278	 22	78.0	13.1	 16
279	 22	101.3	20.8	 16
280	 22	81.0	16.7	 16
281	 22	81.5	14.0	 16
282	 22	82.0	25.8	 16
283	 22	68.0	14.7	 16
284	 22	63.3	12.9	 16
285	 22	71.3	15.7	 16
286	 22	76.3	13.0	 16
287	 22	113.8	17.2	 16
288	 22	340.8	55.6	 16
289	 22	109.3	11.8	 16
290	 22	153.8	22.7	 16
291	 22	130.3	19.5	 16
292	 22	110.8	23.0	 16
293	 22	203.3	36.2	 16
294	 22	222.0	32.5	 16
295	 22	72.3	13.8	 16
296	 22	135.5	19.9	 16
297	 22	71.3	12.2	 16
298	 22	79.5	10.3	 16
299	 22	82.5	13.2	 16
300	 22	84.3	20.5	 16
301	 22	100.0	13.0	 16
302	 22	893.8	154.9	 16
303	 22	312.5	65.9	 16
304	 22	403.8	54.1	 16
305	 22	640.3	108.0	 16
306	 22	121.0	20.2	 16
307	 22	85.0	22.9	 16
308	 22	62.5	12.2	 16
309	 22	126.5	21.2	 16
310	 22	152.3	30.0	 16
311	 22	125.5	22.9	 16
312	 22	76.3	11.2	 20
313	 22	184.0	22.9	 16
314	 22	71.0	19.1	 16
315	 22	62.5	12.4	 16
316	 22	82.3	11.9	 16
317	 22	2492.0	319.9	 16
318	 22	582.0	78.4	 16
319	 22	99.0	16.9	 16
320	 22	118.5	20.1	 16
321	 22	180.3	22.5	 16
322	 22	771.3	90.5	 16
323	 22	115.3	15.6	 16
324	 22	83.0	15.5	 16
325	 22	78.0	15.0	 16
326	 22	70.3	13.7	 16
327	 22	78.5	9.5	 16
328	 22	74.3	12.0	 16
329	 22	64.5	10.8	 16
330	 22	58.0	9.0	 16
331	 22	82.0	13.1	 16
332	 22	202.8	27.9	 16
333	 22	105.8	21.7	 16
334	 22	118.3	23.5	 16
335	 22	1208.5	156.0	 16
336	 22	60.3	7.0	 16
337	 22	165.8	35.6	 16
338	 22	543.0	54.1	 16
339	 22	82.5	17.3	 16
340	 22	315.8	25.8	 16
341	 22	298.3	39.7	 16
342	 22	179.8	29.8	 16
343	 22	88.3	19.9	 16
344	 22	110.0	16.5	 16
345	 22	77.0	13.2	 16
346	 22	92.3	14.6	 16
347	 22	127.5	21.0	 16
348	 22	580.3	100.9	 16
349	 22	674.3	138.1	 16
350	 22	111.3	15.2	 16
351	 22	94.8	15.8	 16
352	 22	87.0	13.5	 16
353	 22	84.3	13.3	 16
354	 22	123.3	25.4	 16
355	 22	1586.3	283.3	 16
356	 22	179.0	16.0	 16
357	 22	1171.0	110.6	 16
358	 22	326.0	29.7	 16
359	 22	355.8	38.9	 16
360	 22	395.5	29.7	 16
361	 22	228.3	27.7	 16
362	 22	110.5	19.7	 16
363	 22	87.8	16.1	 16
364	 22	77.5	17.6	 16
365	 22	127.5	25.4	 16
366	 22	133.0	29.2	 16
367	 22	141.3	18.7	 16
368	 22	182.3	20.1	 16
369	 22	131.8	23.7	 16
370	 22	145.0	23.4	 16
371	 22	163.5	27.1	 16
372	 22	113.3	17.8	 16
373	 22	57.8	11.0	 16
374	 22	121.5	25.1	 16
375	 22	101.0	17.7	 16
376	 22	103.0	14.3	 16
377	 22	165.3	18.3	 16
378	 22	126.8	20.0	 16
379	 22	72.3	16.7	 16
380	 22	88.8	14.4	 16
381	 22	66.5	12.6	 16
382	 22	66.0	11.5	 16
383	 22	86.0	13.5	 16
384	 22	71.8	12.2	 16
385	 22	62.5	10.4	 16
386	 22	66.3	11.9	 16
387	 22	71.8	9.5	 16
388	 22	90.3	14.3	 16
389	 22	90.8	17.2	 16
390	 22	90.3	13.5	 16
391	 22	63.5	12.3	 16
392	 22	159.5	26.4	 16
393	 22	157.8	24.6	 16
394	 22	64.0	11.5	 16
395	 22	130.5	14.1	 16
396	 22	148.3	26.9	 16
397	 22	207.3	28.2	 16
398	 22	103.3	21.3	 16
399	 22	98.8	12.4	 16
400	 22	115.0	25.7	 16
401	 22	92.3	16.4	 16
402	 22	69.5	8.5	 16
403	 22	93.0	9.9	 16
404	 22	191.8	18.1	 16
405	 22	87.5	16.6	 16
406	 22	239.8	21.8	 16
407	 22	235.8	34.3	 16
408	 22	110.0	13.0	 16
409	 22	76.3	10.2	 16
410	 22	71.3	13.1	 16
411	 22	83.0	16.1	 16
412	 22	520.5	129.9	 16
413	 22	85.3	11.0	 16
414	 22	90.5	20.2	 16
415	 22	83.5	15.2	 16
416	 22	69.0	11.1	 16
417	 22	134.3	13.1	 16
418	 22	124.5	16.9	 16
419	 22	122.0	18.7	 16
420	 22	94.0	19.3	 16
421	 22	232.3	23.0	 16
422	 22	87.3	14.7	 16
423	 22	120.5	19.3	 16
424	 22	606.5	52.8	 16
425	 22	146.3	17.1	 16
426	 22	185.8	27.5	 16
427	 22	148.5	22.9	 16
428	 22	733.8	68.3	 16
429	 22	337.3	41.1	 16
430	 22	212.5	35.4	 16
431	 22	85.3	13.4	 16
432	 22	174.3	27.7	 16
433	 22	525.0	36.2	 16
434	 22	542.0	43.8	 16
435	 22	527.8	33.1	 16
436	 22	104.5	22.6	 16
437	 22	84.8	13.7	 16
438	 22	116.0	20.4	 16
439	 22	87.3	15.7	 16
440	 22	93.8	14.6	 16
441	 22	200.3	22.7	 16
442	 22	109.3	23.9	 16
443	 22	76.3	9.1	 16
444	 22	84.3	13.1	 16
445	 22	70.3	14.9	 16
446	 22	64.0	13.1	 16
447	 22	120.5	19.1	 16
448	 22	323.8	38.6	 16
449	 22	1034.3	104.7	 16
450	 22	150.0	16.9	 16
451	 22	279.3	27.0	 16
452	 22	89.3	13.4	 16
453	 22	67.0	13.0	 16
454	 22	82.5	9.2	 20
455	 22	84.3	10.7	 16
456	 22	183.5	27.6	 16
457	 22	149.3	22.9	 16
458	 22	240.8	48.6	 16
459	 22	163.8	22.7	 16
460	 22	188.3	33.2	 16
461	 22	744.3	62.6	 16
462	 22	264.3	38.8	 16
463	 22	196.3	28.3	 16
464	 22	70.3	18.7	 16
465	 22	73.0	12.3	 16
466	 22	96.5	13.2	 16
467	 22	71.0	10.7	 16
468	 22	173.5	23.2	 16
469	 22	125.0	22.8	 16
470	 22	173.8	21.6	 16
471	 22	82.3	16.3	 16
472	 22	124.0	19.8	 16
473	 22	82.5	15.3	 16
474	 22	61.8	10.5	 16
475	 22	69.8	13.1	 16
476	 22	259.5	48.1	 16
477	 22	544.0	50.0	 16
478	 22	136.8	42.8	 16
479	 22	157.8	26.8	 16
480	 22	68.0	14.5	 16
481	 22	70.0	15.9	 16
482	 22	65.3	14.0	 16
483	 22	72.3	10.5	 16
484	 22	60.3	9.2	 16
485	 22	66.8	11.4	 16
486	 22	218.5	26.2	 16
487	 22	406.5	49.9	 16
488	 22	113.3	12.2	 16
489	 22	69.8	12.9	 16
490	 22	328.3	31.2	 16
491	 22	422.3	52.6	 16
492	 22	178.3	15.7	 16
493	 22	112.0	12.6	 16
494	 22	278.5	28.5	 16
495	 22	85.5	17.4	 16
496	 22	234.0	24.9	 16
497	 22	73.5	11.9	 16
498	 22	97.0	18.6	 16
499	 22	111.8	13.4	 16
500	 22	157.3	28.5	 16
501	 22	115.8	18.1	 16
502	 22	197.0	37.7	 16
503	 22	106.3	23.5	 16
504	 22	150.8	25.6	 16
505	 22	488.0	68.9	 16
506	 22	103.0	20.2	 16
507	 22	239.8	30.4	 16
508	 22	101.3	17.2	 16
509	 22	85.0	19.1	 16
510	 22	91.5	16.3	 16
511	 22	532.5	71.6	 16
512	 22	88.8	16.2	 16
513	 22	78.5	15.6	 16
514	 22	68.3	12.5	 16
515	 22	144.8	36.0	 16
516	 22	113.0	16.9	 16
517	 22	78.3	16.5	 16
518	 22	97.8	19.0	 16
519	 22	57.5	9.9	 16
520	 22	82.5	14.2	 16
521	 22	75.0	11.8	 16
522	 22	75.5	9.0	 16
523	 22	137.0	23.0	 16
524	 22	64.0	11.7	 16
525	 22	82.0	12.8	 16
526	 22	60.3	8.8	 16
527	 22	171.3	29.0	 16
528	 22	97.3	16.3	 16
529	 22	253.3	34.2	 16
530	 22	195.5	23.3	 16
531	 22	100.8	20.3	 16
532	 22	230.8	29.3	 16
533	 22	76.5	15.9	 16
534	 22	86.0	19.4	 16
535	 22	142.8	20.3	 16
536	 22	80.5	14.9	 16
537	 22	183.3	23.9	 16
538	 22	87.0	15.3	 16
539	 22	68.3	11.1	 16
540	 22	74.5	11.8	 16
541	 22	61.0	12.6	 16
542	 22	75.3	16.7	 16
543	 22	351.8	39.5	 16
544	 22	247.3	33.4	 16
545	 22	487.8	51.7	 16
546	 22	541.3	112.8	 16
547	 22	80.0	15.3	 16
548	 22	146.5	24.9	 16
549	 22	144.8	14.2	 16
550	 22	208.5	31.8	 16
551	 22	70.0	10.9	 16
552	 22	300.8	28.0	 16
553	 22	88.5	18.2	 16
554	 22	67.5	15.3	 16
555	 22	66.5	15.0	 16
556	 22	71.3	6.8	 16
557	 22	79.0	11.8	 16
558	 22	68.8	8.7	 16
559	 22	96.3	16.1	 16
560	 22	87.0	13.5	 16
561	 22	81.5	11.6	 16
562	 22	156.3	16.9	 16
563	 22	191.0	24.5	 16
564	 22	197.5	20.8	 16
565	 22	72.5	10.4	 16
566	 22	66.5	13.1	 16
567	 22	74.3	16.0	 16
568	 22	107.5	18.3	 16
569	 22	77.3	13.1	 16
570	 22	79.5	10.8	 16
571	 22	76.3	14.3	 16
572	 22	79.8	16.1	 16
573	 22	113.5	17.0	 16
574	 22	93.8	11.5	 16
575	 22	158.5	30.5	 16
576	 22	332.5	52.1	 16
577	 22	147.0	17.9	 16
578	 22	106.3	15.3	 16
579	 22	174.0	20.1	 16
580	 22	185.5	23.2	 16
581	 22	77.0	10.2	 16
582	 22	96.3	21.2	 16
583	 22	1074.5	149.3	 16
584	 22	103.5	15.4	 16
585	 22	456.5	97.9	 16
586	 22	164.0	32.9	 16
587	 22	117.8	23.8	 16
588	 22	80.8	17.2	 16
589	 22	149.8	14.5	 16
590	 22	165.3	26.3	 16
591	 22	252.0	49.2	 16
592	 22	879.3	179.1	 16
593	 22	134.0	16.0	 16
594	 22	122.0	20.0	 16
595	 22	94.8	22.3	 16
596	 22	95.3	16.9	 16
597	 22	77.3	15.3	 20
598	 22	81.3	10.2	 16
599	 22	157.5	32.7	 16
600	 22	112.0	17.7	 16
601	 22	88.5	15.0	 16
602	 22	225.3	31.1	 16
603	 22	90.3	14.1	 16
604	 22	86.0	11.4	 16
605	 22	137.0	17.6	 16
606	 22	109.3	16.7	 16
607	 22	396.8	50.5	 16
608	 22	111.8	27.0	 16
609	 22	222.5	26.5	 16
610	 22	116.0	13.5	 16
611	 22	79.3	14.8	 16
612	 22	129.5	19.3	 16
613	 22	229.3	57.4	 16
614	 22	218.5	28.9	 16
615	 22	387.3	68.1	 16
616	 22	691.5	65.8	 16
617	 22	131.5	15.3	 16
618	 22	68.8	9.9	 16
619	 22	145.0	18.9	 16
620	 22	75.5	14.4	 16
621	 22	108.3	16.6	 16
622	 22	93.8	21.2	 16
623	 22	132.3	15.7	 16
624	 22	82.8	16.9	 16
625	 22	81.3	10.4	 16
626	 22	103.8	15.0	 16
627	 22	74.3	16.8	 16
628	 22	76.8	16.3	 16
629	 22	79.0	12.6	 16
630	 22	252.0	36.1	 16
631	 22	371.5	35.1	 16
632	 22	412.0	43.5	 16
633	 22	104.5	18.3	 16
634	 22	60.3	12.8	 16
635	 22	177.0	30.5	 16
636	 22	125.0	22.2	 16
637	 22	93.3	19.3	 16
638	 22	357.5	70.3	 16
639	 22	75.3	12.1	 16
640	 22	90.8	15.8	 16
641	 22	245.8	34.8	 16
642	 22	104.0	15.2	 16
643	 22	71.8	11.8	 16
644	 22	80.3	12.8	 16
645	 22	61.3	12.3	 16
646	 22	74.3	14.9	 16
647	 22	127.5	19.2	 16
648	 22	157.3	18.4	 16
649	 22	168.8	28.5	 16
650	 22	183.5	23.1	 16
651	 22	138.8	27.5	 16
652	 22	199.3	27.6	 16
653	 22	181.5	27.3	 16
654	 22	121.3	20.4	 16
655	 22	147.3	19.0	 16
656	 22	1374.5	191.8	 16
657	 22	1882.3	420.6	 16
658	 22	137.3	17.7	 16
659	 22	95.0	17.8	 16
660	 22	183.0	25.1	 16
661	 22	93.8	18.6	 16
662	 22	619.8	106.9	 16
663	 22	83.0	11.5	 16
664	 22	444.0	42.2	 16
665	 22	54.0	9.0	 16
666	 22	61.5	9.3	 16
667	 22	60.3	9.8	 16
668	 22	51.0	7.7	 16
669	 22	56.0	13.4	 16
670	 22	63.3	12.3	 16
671	 22	260.5	34.1	 16
672	 22	104.0	17.3	 16
673	 22	132.3	15.7	 16
674	 22	227.5	24.3	 16
675	 22	91.5	16.8	 16
676	 22	118.0	19.1	 16
677	 22	105.3	14.6	 16
678	 22	68.3	11.1	 16
679	 22	76.5	10.7	 16
680	 22	69.5	12.7	 16
681	 22	107.5	24.7	 16
682	 22	197.8	17.8	 16
683	 22	63.5	15.3	 16
684	 22	69.3	12.1	 16
685	 22	64.3	16.2	 16
686	 22	83.8	11.5	 16
687	 22	151.5	18.8	 16
688	 22	118.5	22.1	 16
689	 22	460.0	66.0	 16
690	 22	632.5	78.5	 16
691	 22	166.3	17.7	 16
692	 22	70.8	15.6	 16
693	 22	225.5	24.6	 16
694	 22	244.8	27.9	 16
695	 22	95.3	7.1	 16
696	 22	167.8	27.8	 16
697	 22	156.8	24.9	 16
698	 22	85.8	12.5	 16
699	 22	68.5	9.8	 16
700	 22	403.5	45.5	 16
701	 22	140.0	18.4	 16
702	 22	79.8	16.7	 16
703	 22	86.3	14.6	 16
704	 22	108.8	20.7	 16
705	 22	514.8	41.8	 16
706	 22	136.3	16.8	 16
707	 22	106.5	21.4	 16
708	 22	345.3	37.4	 16
709	 22	425.3	41.6	 16
710	 22	203.3	24.6	 16
711	 22	6459.8	782.4	 16
  0	 23	147.8	21.0	 16
  1	 23	351.8	42.4	 16
  2	 23	150.8	28.8	 16
  3	 23	346.8	47.2	 16
  4	 23	3387.5	509.3	 16
  5	 23	99.0	15.6	 16
  6	 23	290.0	44.9	 16
  7	 23	205.0	33.7	 16
  8	 23	135.3	14.4	 16
  9	 23	100.3	16.1	 16
 10	 23	97.0	16.4	 16
 11	 23	195.3	24.4	 16
 12	 23	221.8	35.0	 16
 13	 23	213.5	31.4	 16
 14	 23	122.8	18.5	 16
 15	 23	172.0	21.1	 16
 16	 23	263.3	43.5	 16
 17	 23	232.3	39.5	 16
 18	 23	138.8	29.0	 16
 19	 23	448.5	57.3	 16
 20	 23	217.8	28.8	 16
 21	 23	79.8	17.2	 16
 22	 23	494.8	81.5	 16
 23	 23	486.0	55.8	 16
 24	 23	675.3	98.8	 16
 25	 23	421.8	39.4	 16
 26	 23	327.8	72.9	 16
 27	 23	133.5	19.1	 16
 28	 23	88.0	15.0	 16
 29	 23	110.0	18.4	 16
 30	 23	649.8	85.5	 16
 31	 23	268.0	33.9	 16
 32	 23	483.0	77.0	 20
 33	 23	659.8	132.8	 16
 34	 23	80.5	13.7	 16
 35	 23	359.0	84.3	 16
 36	 23	129.0	17.4	 16
 37	 23	246.8	50.3	 16
 38	 23	57.5	9.4	 16
 39	 23	371.0	82.7	 16
 40	 23	203.3	28.8	 16
 41	 23	74.0	10.5	 16
 42	 23	83.5	14.7	 16
 43	 23	73.5	14.2	 16
 44	 23	461.3	43.1	 16
 45	 23	364.8	60.0	 16
 46	 23	126.8	20.3	 16
 47	 23	93.5	16.2	 16
 48	 23	440.5	61.8	 16
 49	 23	103.8	13.9	 16
 50	 23	75.3	13.8	 16
 51	 23	465.3	64.6	 16
 52	 23	694.0	61.1	 16
 53	 23	617.0	68.1	 16
 54	 23	251.0	67.0	 16
 55	 23	274.0	29.6	 16
 56	 23	104.8	13.9	 16
 57	 23	155.0	12.5	 16
 58	 23	118.3	19.1	 16
 59	 23	91.0	18.2	 16
 60	 23	312.0	58.2	 16
 61	 23	116.5	21.5	 16
 62	 23	316.5	35.3	 16
 63	 23	114.3	10.6	 16
 64	 23	1043.5	110.0	 16
 65	 23	174.3	31.9	 16
 66	 23	76.0	11.4	 16
 67	 23	79.0	16.9	 16
 68	 23	67.8	12.1	 16
 69	 23	127.0	16.5	 16
 70	 23	208.3	31.3	 16
 71	 23	79.0	15.2	 16
 72	 23	92.3	21.0	 16
 73	 23	174.0	19.1	 16
 74	 23	264.0	48.9	 16
 75	 23	234.8	34.8	 16
 76	 23	145.0	17.2	 16
 77	 23	68.5	11.0	 16
 78	 23	74.0	14.5	 16
 79	 23	147.5	25.4	 16
 80	 23	86.3	17.7	 16
 81	 23	73.5	15.0	 16
 82	 23	89.3	18.2	 16
 83	 23	68.0	13.8	 16
 84	 23	130.3	20.9	 16
 85	 23	122.3	17.4	 16
 86	 23	74.8	13.6	 16
 87	 23	476.0	56.7	 16
 88	 23	217.8	29.5	 16
 89	 23	123.0	18.3	 16
 90	 23	86.8	16.0	 16
 91	 23	207.3	28.1	 16
 92	 23	213.0	29.0	 16
 93	 23	650.8	66.2	 16
 94	 23	202.0	29.8	 16
 95	 23	80.3	12.9	 16
 96	 23	91.8	16.6	 16
 97	 23	192.5	33.5	 16
 98	 23	112.0	21.9	 16
 99	 23	294.0	58.3	 16
100	 23	104.8	18.6	 16
101	 23	173.3	32.6	 16
102	 23	177.0	20.0	 16
103	 23	83.0	17.7	 16
104	 23	458.3	50.5	 16
105	 23	558.5	54.8	 16
106	 23	329.0	45.9	 16
107	 23	70.3	12.8	 16
108	 23	728.5	75.2	 16
109	 23	66.3	11.5	 16
110	 23	80.8	13.1	 16
111	 23	1318.5	101.3	 16
112	 23	572.3	67.1	 16
113	 23	78.3	17.7	 16
114	 23	80.0	12.4	 16
115	 23	419.3	62.4	 16
116	 23	74.0	10.2	 16
117	 23	199.5	40.7	 16
118	 23	170.0	24.4	 16
119	 23	77.3	14.6	 16
120	 23	121.3	19.0	 16
121	 23	313.8	53.5	 16
122	 23	94.5	14.8	 16
123	 23	424.8	49.7	 16
124	 23	194.0	35.1	 16
125	 23	294.0	44.0	 16
126	 23	104.0	11.9	 16
127	 23	134.5	20.6	 16
128	 23	237.3	34.6	 16
129	 23	184.0	29.5	 16
130	 23	122.5	22.2	 16
131	 23	245.8	36.0	 16
132	 23	845.0	46.8	 16
133	 23	1847.3	134.1	 16
134	 23	561.5	52.3	 16
135	 23	347.0	41.7	 16
136	 23	1414.3	102.8	 16
137	 23	132.5	25.3	 16
138	 23	894.0	106.8	 16
139	 23	167.5	22.2	 16
140	 23	73.8	11.8	 16
141	 23	81.0	13.6	 16
142	 23	112.8	20.5	 16
143	 23	66.5	10.9	 16
144	 23	553.5	61.5	 16
145	 23	152.5	17.3	 16
146	 23	573.0	52.9	 16
147	 23	117.0	26.1	 16
148	 23	134.3	24.4	 16
149	 23	164.8	28.2	 16
150	 23	79.3	13.7	 16
151	 23	100.3	18.8	 16
152	 23	239.5	24.4	 16
153	 23	331.0	56.1	 16
154	 23	192.0	34.0	 16
155	 23	269.8	36.6	 16
156	 23	258.8	22.0	 16
157	 23	104.3	21.8	 16
158	 23	560.5	63.5	 16
159	 23	208.5	34.1	 16
160	 23	2846.0	379.6	 16
161	 23	1931.5	211.4	 16
162	 23	87.0	13.6	 16
163	 23	101.3	14.0	 16
164	 23	1084.0	213.6	 16
165	 23	76.8	13.9	 16
166	 23	61.3	12.0	 16
167	 23	426.0	74.3	 16
168	 23	97.5	13.1	 16
169	 23	207.3	29.1	 16
170	 23	280.8	38.1	 16
171	 23	71.0	15.1	 16
172	 23	337.5	53.1	 16
173	 23	161.0	26.9	 16
174	 23	397.8	46.9	 20
175	 23	185.8	39.4	 16
176	 23	216.8	32.5	 16
177	 23	242.8	29.8	 16
178	 23	137.8	17.0	 16
179	 23	150.8	22.3	 16
180	 23	135.5	24.1	 16
181	 23	310.0	18.0	 16
182	 23	396.5	112.9	 16
183	 23	80.8	16.8	 16
184	 23	187.0	38.6	 16
185	 23	134.3	28.7	 16
186	 23	69.3	11.6	 16
187	 23	216.5	32.8	 16
188	 23	306.0	45.7	 16
189	 23	250.5	31.0	 16
190	 23	183.8	22.1	 16
191	 23	192.0	41.2	 16
192	 23	114.3	21.0	 16
193	 23	114.0	19.9	 16
194	 23	102.3	19.2	 16
195	 23	105.8	16.2	 16
196	 23	800.0	88.5	 16
197	 23	85.0	11.2	 16
198	 23	104.0	15.4	 16
199	 23	94.5	23.0	 16
200	 23	304.0	40.0	 16
201	 23	87.3	14.4	 16
202	 23	71.0	14.0	 16
203	 23	536.8	71.0	 16
204	 23	300.5	40.5	 16
205	 23	317.3	48.1	 16
206	 23	564.3	61.4	 16
207	 23	81.3	17.7	 16
208	 23	200.8	35.5	 16
209	 23	195.8	37.4	 16
210	 23	379.3	40.8	 16
211	 23	935.5	148.8	 16
212	 23	123.3	17.0	 16
213	 23	1773.8	217.6	 16
214	 23	82.3	12.6	 16
215	 23	1294.8	112.4	 16
216	 23	179.8	18.3	 16
217	 23	86.3	19.4	 16
218	 23	75.3	14.3	 16
219	 23	3027.8	267.4	 16
220	 23	94.3	13.9	 16
221	 23	109.0	17.3	 16
222	 23	383.0	59.7	 16
223	 23	59.5	11.4	 16
224	 23	1147.5	105.1	 16
225	 23	357.8	38.3	 16
226	 23	135.3	21.7	 16
227	 23	116.3	15.3	 16
228	 23	153.0	25.0	 16
229	 23	182.5	30.5	 16
230	 23	141.8	20.1	 16
231	 23	1161.3	144.3	 16
232	 23	636.0	45.9	 16
233	 23	293.8	33.0	 16
234	 23	76.3	12.4	 16
235	 23	1474.5	157.1	 16
236	 23	139.3	20.5	 16
237	 23	64.0	12.3	 16
238	 23	67.8	15.0	 16
239	 23	641.3	49.9	 16
240	 23	206.3	31.8	 16
241	 23	151.5	23.5	 16
242	 23	97.5	19.7	 16
243	 23	102.0	10.2	 16
244	 23	550.8	72.2	 16
245	 23	375.5	40.7	 16
246	 23	72.5	12.9	 16
247	 23	77.3	11.7	 16
248	 23	271.3	32.3	 16
249	 23	177.3	19.7	 16
250	 23	317.0	46.2	 16
251	 23	75.3	12.7	 16
252	 23	203.0	29.3	 16
253	 23	83.8	11.9	 16
254	 23	63.5	10.3	 16
255	 23	81.8	12.7	 16
256	 23	243.5	26.0	 16
257	 23	143.8	22.5	 16
258	 23	193.5	26.3	 16
259	 23	453.3	48.6	 16
260	 23	3894.3	348.5	 16
261	 23	4274.8	113.8	 16
262	 23	4351.0	325.7	 16
263	 23	97.3	16.7	 16
264	 23	74.3	13.1	 16
265	 23	66.3	9.6	 16
266	 23	450.8	52.6	 16
267	 23	142.3	23.3	 16
268	 23	160.0	21.0	 16
269	 23	133.5	17.7	 16
270	 23	235.0	29.7	 16
271	 23	98.3	15.9	 16
272	 23	1468.3	121.8	 16
273	 23	9491.5	699.0	 16
274	 23	116.3	24.5	 16
275	 23	247.3	26.4	 16
276	 23	277.0	29.1	 16
277	 23	74.3	13.9	 16
278	 23	443.8	29.9	 16
279	 23	1662.5	185.7	 16
280	 23	144.0	24.7	 16
281	 23	132.5	19.8	 16
282	 23	221.5	30.4	 16
283	 23	498.5	59.4	 16
284	 23	91.3	15.5	 16
285	 23	72.0	12.3	 16
286	 23	151.8	27.1	 16
287	 23	329.8	42.5	 16
288	 23	90.5	18.4	 16
289	 23	894.3	85.3	 16
290	 23	1663.3	175.3	 16
291	 23	341.5	29.5	 16
292	 23	216.8	29.9	 16
293	 23	277.8	38.3	 16
294	 23	316.0	52.0	 16
295	 23	229.5	32.6	 16
296	 23	83.8	18.1	 16
297	 23	75.0	10.5	 16
298	 23	486.3	60.4	 16
299	 23	2119.5	320.7	 16
300	 23	110.0	11.7	 16
301	 23	102.5	14.8	 16
302	 23	3869.5	389.5	 16
303	 23	93.3	18.4	 16
304	 23	224.5	35.8	 16
305	 23	221.0	32.6	 16
306	 23	623.3	80.4	 16
307	 23	672.5	73.4	 16
308	 23	101.8	14.2	 16
309	 23	130.3	23.7	 16
310	 23	134.3	23.7	 16
311	 23	626.5	82.5	 16
312	 23	879.8	128.6	 16
313	 23	80.3	13.3	 16
314	 23	517.5	91.0	 16
315	 23	76.3	11.5	 16
316	 23	225.8	52.2	 20
317	 23	100.3	17.1	 16
318	 23	111.5	18.4	 16
319	 23	102.3	15.2	 16
320	 23	142.0	17.9	 16
321	 23	99.3	14.2	 16
322	 23	251.5	25.5	 16
323	 23	113.8	19.1	 16
324	 23	200.3	24.0	 16
325	 23	1244.8	134.3	 16
326	 23	193.5	27.3	 16
327	 23	78.3	13.0	 16
328	 23	417.8	54.8	 16
329	 23	152.0	16.4	 16
330	 23	496.5	56.2	 16
331	 23	103.5	14.9	 16
332	 23	136.5	19.1	 16
333	 23	62.0	8.9	 16
334	 23	95.3	19.6	 16
335	 23	73.0	10.6	 16
336	 23	90.5	14.9	 16
337	 23	76.8	13.4	 16
338	 23	180.3	18.4	 16
339	 23	68.0	12.5	 16
340	 23	95.0	15.9	 16
341	 23	167.0	28.7	 16
342	 23	136.0	21.3	 16
343	 23	151.3	21.9	 16
344	 23	254.5	26.4	 16
345	 23	728.3	74.6	 16
346	 23	110.0	14.7	 16
347	 23	92.3	16.0	 16
348	 23	263.8	40.2	 16
349	 23	307.0	36.0	 16
350	 23	215.8	20.9	 16
351	 23	66.0	11.1	 16
352	 23	597.0	76.4	 16
353	 23	97.8	13.9	 16
354	 23	920.5	126.0	 16
355	 23	94.3	19.5	 16
356	 23	479.3	50.7	 16
357	 23	128.0	18.8	 16
358	 23	1045.8	79.9	 16
359	 23	405.3	28.0	 16
360	 23	238.8	22.7	 16
361	 23	498.5	39.1	 16
362	 23	1099.5	112.7	 16
363	 23	264.8	25.6	 16
364	 23	129.0	15.6	 16
365	 23	694.5	71.8	 16
366	 23	60.0	13.8	 16
367	 23	68.3	13.3	 16
368	 23	82.0	17.7	 16
369	 23	65.0	10.9	 16
370	 23	185.5	28.1	 16
371	 23	59.3	9.1	 16
372	 23	704.8	76.1	 16
373	 23	726.8	66.5	 16
374	 23	84.3	16.1	 16
375	 23	76.5	12.8	 16
376	 23	81.8	14.1	 16
377	 23	721.3	76.6	 16
378	 23	215.8	31.2	 16
379	 23	373.8	24.1	 16
380	 23	289.0	24.7	 16
381	 23	5769.3	414.7	 16
382	 23	255.0	30.3	 16
383	 23	79.5	13.1	 16
384	 23	81.0	20.0	 16
385	 23	112.0	14.6	 16
386	 23	85.5	11.0	 16
387	 23	108.5	17.7	 16
388	 23	62.5	10.5	 16
389	 23	124.8	16.3	 16
390	 23	104.3	19.7	 16
391	 23	1286.8	196.2	 16
392	 23	70.0	12.5	 16
393	 23	97.8	24.1	 16
394	 23	525.0	67.7	 16
395	 23	175.0	25.2	 16
396	 23	137.0	65.7	 16
397	 23	1067.3	64.0	 16
398	 23	237.3	18.4	 16
399	 23	466.8	39.4	 16
400	 23	1663.3	148.8	 16
401	 23	241.3	32.9	 16
402	 23	3168.5	565.3	 16
403	 23	9162.3	669.8	 16
404	 23	186.3	23.4	 16
405	 23	4716.0	440.4	 16
406	 23	102.8	18.1	 16
407	 23	167.8	32.6	 16
408	 23	257.0	24.3	 16
409	 23	130.3	21.8	 16
410	 23	194.0	24.1	 16
411	 23	225.0	26.0	 16
412	 23	840.8	129.6	 16
413	 23	988.0	94.6	 16
414	 23	66.5	11.0	 16
415	 23	161.3	27.0	 16
416	 23	208.5	31.8	 16
417	 23	153.0	20.7	 16
418	 23	322.0	37.7	 16
419	 23	178.5	26.3	 16
420	 23	58.8	10.3	 16
421	 23	80.0	9.9	 16
422	 23	779.5	61.0	 16
423	 23	71.0	12.6	 16
424	 23	76.3	11.9	 16
425	 23	109.5	22.2	 16
426	 23	4676.3	457.7	 16
427	 23	433.8	40.0	 16
428	 23	445.3	39.7	 16
429	 23	8131.8	687.6	 16
430	 23	4198.5	480.9	 16
431	 23	105.0	16.9	 16
432	 23	179.3	27.3	 16
433	 23	133.8	25.4	 16
434	 23	375.3	35.6	 16
435	 23	768.0	79.9	 16
436	 23	495.8	47.7	 16
437	 23	243.8	47.3	 16
438	 23	251.3	35.9	 16
439	 23	525.0	57.5	 16
440	 23	84.5	17.7	 16
441	 23	330.3	40.5	 16
442	 23	173.3	22.2	 16
443	 23	120.3	19.3	 16
444	 23	104.5	15.8	 16
445	 23	351.0	41.2	 16
446	 23	383.8	29.7	 16
447	 23	1142.3	85.4	 16
448	 23	306.3	42.2	 16
449	 23	172.8	20.4	 16
450	 23	697.3	53.9	 16
451	 23	407.8	61.9	 16
452	 23	465.0	63.6	 16
453	 23	317.0	57.5	 16
454	 23	888.0	137.8	 16
455	 23	1382.8	219.6	 16
456	 23	155.5	23.4	 16
457	 23	185.0	25.8	 16
458	 23	879.0	91.1	 16
459	 23	755.8	135.6	 20
460	 23	265.3	36.3	 16
461	 23	988.3	124.3	 16
462	 23	379.5	46.1	 16
463	 23	149.8	21.2	 16
464	 23	301.5	31.6	 16
465	 23	106.3	18.8	 16
466	 23	66.3	20.2	 16
467	 23	79.5	9.5	 16
468	 23	1165.5	177.8	 16
469	 23	187.3	29.0	 16
470	 23	73.5	12.6	 16
471	 23	98.0	20.6	 16
472	 23	1537.3	143.7	 16
473	 23	291.8	38.4	 16
474	 23	525.5	49.7	 16
475	 23	1365.5	172.6	 16
476	 23	275.5	36.7	 16
477	 23	421.3	44.3	 16
478	 23	191.5	27.2	 16
479	 23	1155.0	93.8	 16
480	 23	148.3	21.5	 16
481	 23	74.0	14.5	 16
482	 23	102.3	15.7	 16
483	 23	93.0	16.9	 16
484	 23	873.0	50.9	 16
485	 23	273.3	28.0	 16
486	 23	277.3	37.0	 16
487	 23	218.3	27.7	 16
488	 23	119.5	30.7	 16
489	 23	1572.8	89.6	 16
490	 23	210.5	29.4	 16
491	 23	242.0	29.1	 16
492	 23	232.0	33.1	 16
493	 23	1650.8	127.5	 16
494	 23	160.0	23.8	 16
495	 23	145.5	23.3	 16
496	 23	87.0	15.2	 16
497	 23	2018.0	193.8	 16
498	 23	169.8	18.0	 16
499	 23	305.5	33.0	 16
500	 23	193.3	40.3	 16
501	 23	129.0	23.9	 16
502	 23	309.5	41.7	 16
503	 23	117.5	20.6	 16
504	 23	510.5	57.4	 16
505	 23	735.5	55.4	 16
506	 23	221.5	26.0	 16
507	 23	180.3	24.9	 16
508	 23	80.3	12.1	 16
509	 23	140.8	16.5	 16
510	 23	154.5	26.6	 16
511	 23	1154.5	103.6	 16
512	 23	97.0	15.1	 16
513	 23	231.5	30.5	 16
514	 23	82.8	15.5	 16
515	 23	56.5	8.9	 16
516	 23	125.0	22.7	 16
517	 23	76.5	11.4	 16
518	 23	136.3	15.7	 16
519	 23	103.3	22.5	 16
520	 23	179.0	32.9	 16
521	 23	1292.8	81.0	 16
522	 23	2975.8	426.6	 16
523	 23	235.8	27.1	 16
524	 23	903.3	73.2	 16
525	 23	77.0	16.9	 16
526	 23	89.0	15.4	 16
527	 23	297.0	25.8	 16
528	 23	321.8	40.2	 16
529	 23	383.8	34.8	 16
530	 23	743.8	80.5	 16
531	 23	146.3	17.5	 16
532	 23	10557.5	588.7	 16
533	 23	321.3	38.0	 16
534	 23	504.8	44.3	 16
535	 23	1095.8	103.1	 16
536	 23	214.3	23.0	 16
537	 23	600.8	74.6	 16
538	 23	181.8	26.1	 16
539	 23	102.0	15.3	 16
540	 23	406.0	66.9	 16
541	 23	98.5	18.1	 16
542	 23	79.3	16.9	 16
543	 23	5466.3	561.4	 16
544	 23	189.3	17.9	 16
545	 23	92.0	11.7	 16
546	 23	89.0	14.9	 16
547	 23	179.5	29.4	 16
548	 23	89.8	18.0	 16
549	 23	393.5	41.9	 16
550	 23	193.8	31.3	 16
551	 23	769.3	105.8	 16
552	 23	134.0	20.1	 16
553	 23	241.3	33.5	 16
554	 23	215.5	18.1	 16
555	 23	272.3	32.3	 16
556	 23	552.0	62.3	 16
557	 23	249.5	24.6	 16
558	 23	165.3	18.9	 16
559	 23	81.8	16.0	 16
560	 23	74.5	11.6	 16
561	 23	8964.3	995.9	 16
562	 23	129.3	19.2	 16
563	 23	221.3	34.0	 16
564	 23	303.3	29.2	 16
565	 23	853.3	136.2	 16
566	 23	1682.0	255.0	 16
567	 23	1861.0	277.7	 16
568	 23	1031.5	126.9	 16
569	 23	182.8	26.4	 16
570	 23	170.3	38.6	 16
571	 23	88.3	17.0	 16
572	 23	241.8	33.5	 16
573	 23	2553.5	323.7	 16
574	 23	892.3	143.6	 16
575	 23	1923.8	229.6	 16
576	 23	175.5	28.7	 16
577	 23	78.3	13.8	 16
578	 23	2748.3	469.8	 16
579	 23	104.8	14.6	 16
580	 23	65.5	6.3	 16
581	 23	970.0	138.0	 16
582	 23	735.0	124.0	 16
583	 23	89.0	12.7	 16
584	 23	388.0	62.1	 16
585	 23	120.5	24.2	 16
586	 23	2381.0	429.9	 16
587	 23	2814.8	428.5	 16
588	 23	172.0	20.2	 16
589	 23	2631.8	460.7	 16
590	 23	1391.3	245.8	 16
591	 23	175.5	31.2	 16
592	 23	899.5	140.5	 16
593	 23	1025.0	80.6	 16
594	 23	2199.5	322.3	 16
595	 23	88.0	14.9	 16
596	 23	379.3	78.4	 16
597	 23	61.3	14.1	 16
598	 23	106.0	17.0	 16
599	 23	516.0	89.3	 16
600	 23	161.0	19.8	 16
601	 23	72.3	14.6	 20
602	 23	91.5	16.9	 16
603	 23	3423.0	355.6	 16
604	 23	77.5	11.6	 16
605	 23	367.0	42.7	 16
606	 23	290.0	38.8	 16
607	 23	243.0	26.0	 16
608	 23	1400.8	168.3	 16
609	 23	299.3	44.6	 16
610	 23	326.0	50.2	 16
611	 23	1006.5	129.2	 16
612	 23	807.5	98.2	 16
613	 23	212.0	28.3	 16
614	 23	1500.3	112.9	 16
615	 23	338.3	27.4	 16
616	 23	410.0	41.6	 16
617	 23	156.3	24.7	 16
618	 23	769.0	81.4	 16
619	 23	423.5	49.3	 16
620	 23	216.5	33.2	 16
621	 23	191.0	25.1	 16
622	 23	226.3	20.6	 16
623	 23	354.0	42.4	 16
624	 23	216.0	44.1	 16
625	 23	207.8	14.6	 16
626	 23	184.3	24.5	 16
627	 23	129.0	15.4	 16
628	 23	153.3	22.8	 16
629	 23	78.3	12.9	 16
630	 23	71.5	10.6	 16
631	 23	233.0	22.8	 16
632	 23	122.8	17.6	 16
633	 23	216.0	29.7	 16
634	 23	3318.3	577.8	 16
635	 23	1098.0	115.6	 16
636	 23	578.3	80.1	 16
637	 23	760.3	103.7	 16
638	 23	160.0	28.3	 16
639	 23	252.3	28.3	 16
640	 23	2215.3	193.2	 16
641	 23	124.5	20.0	 16
642	 23	115.5	18.8	 16
643	 23	125.5	15.6	 16
644	 23	851.0	98.9	 16
645	 23	184.0	19.5	 16
646	 23	627.8	56.8	 16
647	 23	160.5	19.8	 16
648	 23	388.3	40.9	 16
649	 23	262.0	30.1	 16
650	 23	224.3	26.0	 16
651	 23	198.3	18.4	 16
652	 23	177.5	23.7	 16
653	 23	135.8	20.9	 16
654	 23	92.8	18.0	 16
655	 23	99.3	17.2	 16
656	 23	291.5	47.9	 16
657	 23	167.5	24.6	 16
658	 23	177.5	24.5	 16
659	 23	420.3	22.2	 16
660	 23	310.8	40.9	 16
661	 23	69.0	16.9	 16
662	 23	439.5	51.9	 16
663	 23	313.8	31.0	 16
664	 23	342.3	26.3	 16
665	 23	154.8	24.8	 16
666	 23	101.0	13.9	 16
667	 23	135.3	14.2	 16
668	 23	49.3	6.7	 16
669	 23	100.5	11.5	 16
670	 23	104.5	18.1	 16
671	 23	281.5	33.0	 16
672	 23	108.3	16.0	 16
673	 23	95.3	14.2	 16
674	 23	97.8	12.6	 16
675	 23	125.0	16.2	 16
676	 23	317.0	47.0	 16
677	 23	242.8	56.8	 16
678	 23	103.5	16.7	 16
679	 23	62.8	14.7	 16
680	 23	70.3	13.4	 16
681	 23	197.5	31.6	 16
682	 23	2196.3	168.1	 16
683	 23	159.5	18.3	 16
684	 23	514.3	65.2	 16
685	 23	173.0	18.4	 16
686	 23	166.5	36.7	 16
687	 23	152.3	21.5	 16
688	 23	560.5	51.6	 16
689	 23	204.8	32.8	 16
690	 23	192.8	27.6	 16
691	 23	172.8	20.9	 16
692	 23	67.3	12.0	 16
693	 23	214.3	23.3	 16
694	 23	909.3	90.2	 16
695	 23	235.5	24.8	 16
696	 23	64.5	6.6	 16
697	 23	86.3	13.4	 16
698	 23	74.0	11.6	 16
699	 23	65.3	10.2	 16
700	 23	393.0	40.2	 16
701	 23	355.0	39.6	 16
702	 23	298.3	34.5	 16
703	 23	626.8	67.9	 16
704	 23	198.3	22.6	 16
705	 23	230.0	30.0	 16
706	 23	206.0	21.8	 16
707	 23	233.3	31.7	 16
708	 23	198.8	27.4	 16
709	 23	201.3	21.2	 16
710	 23	104.8	14.8	 16
711	 23	116.5	25.6	 16
  0	 24	10043.8	1225.0	 16
  1	 24	149.3	24.3	 16
  2	 24	97.8	11.6	 16
  3	 24	123.5	35.2	 16
  4	 24	521.3	73.6	 16
  5	 24	102.5	15.7	 16
  6	 24	199.8	21.7	 16
  7	 24	230.3	24.7	 16
  8	 24	186.0	25.0	 16
  9	 24	96.0	13.5	 16
 10	 24	90.0	15.5	 16
 11	 24	296.5	36.8	 16
 12	 24	128.5	16.7	 16
 13	 24	608.5	62.9	 16
 14	 24	107.8	28.5	 16
 15	 24	256.0	27.0	 16
 16	 24	133.3	30.5	 16
 17	 24	95.0	17.8	 16
 18	 24	99.5	21.7	 16
 19	 24	170.8	22.4	 16
 20	 24	147.8	14.7	 16
 21	 24	82.3	12.8	 16
 22	 24	179.8	21.3	 16
 23	 24	250.3	35.8	 16
 24	 24	704.5	62.8	 16
 25	 24	523.3	50.5	 16
 26	 24	104.3	16.1	 16
 27	 24	117.0	21.9	 16
 28	 24	80.8	14.0	 16
 29	 24	155.0	35.4	 16
 30	 24	247.0	22.0	 16
 31	 24	558.3	60.1	 16
 32	 24	181.3	26.1	 16
 33	 24	223.5	31.3	 16
 34	 24	77.3	10.8	 16
 35	 24	108.5	22.9	 16
 36	 24	277.0	39.5	 20
 37	 24	80.5	13.0	 16
 38	 24	67.3	14.7	 16
 39	 24	92.0	22.4	 16
 40	 24	78.3	12.0	 16
 41	 24	85.0	14.8	 16
 42	 24	79.5	11.4	 16
 43	 24	86.3	17.5	 16
 44	 24	159.0	22.7	 16
 45	 24	530.3	72.3	 16
 46	 24	137.8	22.8	 16
 47	 24	116.0	17.2	 16
 48	 24	188.8	36.1	 16
 49	 24	125.3	18.7	 16
 50	 24	79.3	12.9	 16
 51	 24	152.5	34.4	 16
 52	 24	646.8	54.3	 16
 53	 24	571.0	55.2	 16
 54	 24	413.0	129.7	 16
 55	 24	512.0	60.5	 16
 56	 24	91.0	17.0	 16
 57	 24	95.5	16.5	 16
 58	 24	93.5	22.9	 16
 59	 24	89.3	11.6	 16
 60	 24	79.3	13.6	 16
 61	 24	102.5	21.1	 16
 62	 24	107.0	28.4	 16
 63	 24	103.5	18.3	 16
 64	 24	188.5	30.6	 16
 65	 24	77.8	10.1	 16
 66	 24	81.3	13.6	 16
 67	 24	80.5	16.7	 16
 68	 24	69.0	14.5	 16
 69	 24	110.3	12.6	 16
 70	 24	214.5	38.2	 16
 71	 24	85.3	22.3	 16
 72	 24	78.3	15.8	 16
 73	 24	183.5	24.9	 16
 74	 24	137.5	16.4	 16
 75	 24	119.0	22.2	 16
 76	 24	194.0	28.0	 16
 77	 24	55.5	10.4	 16
 78	 24	70.3	15.3	 16
 79	 24	79.0	14.7	 16
 80	 24	96.5	21.0	 16
 81	 24	67.0	10.7	 16
 82	 24	121.3	17.6	 16
 83	 24	84.8	18.0	 16
 84	 24	77.5	19.1	 16
 85	 24	79.0	10.6	 16
 86	 24	66.3	7.6	 16
 87	 24	123.3	18.3	 16
 88	 24	127.0	18.7	 16
 89	 24	92.3	21.1	 16
 90	 24	64.3	11.6	 16
 91	 24	109.3	15.7	 16
 92	 24	103.3	16.6	 16
 93	 24	140.3	18.3	 16
 94	 24	214.3	24.0	 16
 95	 24	92.0	15.3	 16
 96	 24	77.3	9.6	 16
 97	 24	84.3	16.7	 16
 98	 24	109.5	17.1	 16
 99	 24	117.5	15.9	 16
100	 24	84.5	27.3	 16
101	 24	129.5	21.8	 16
102	 24	153.5	27.1	 16
103	 24	65.3	10.4	 16
104	 24	177.5	25.3	 16
105	 24	170.8	28.7	 16
106	 24	108.5	15.8	 16
107	 24	71.8	15.0	 16
108	 24	108.5	21.2	 16
109	 24	65.5	12.7	 16
110	 24	81.8	13.0	 16
111	 24	235.0	38.1	 16
112	 24	259.5	30.4	 16
113	 24	81.3	10.9	 16
114	 24	67.5	11.1	 16
115	 24	66.0	13.3	 16
116	 24	65.3	12.2	 16
117	 24	96.5	15.9	 16
118	 24	88.3	13.5	 16
119	 24	67.5	10.0	 16
120	 24	107.3	18.4	 16
121	 24	96.5	18.9	 16
122	 24	76.0	18.3	 16
123	 24	93.5	14.3	 16
124	 24	75.0	15.3	 16
125	 24	67.5	10.5	 16
126	 24	104.3	19.8	 16
127	 24	107.0	17.9	 16
128	 24	109.3	16.8	 16
129	 24	107.3	13.8	 16
130	 24	145.8	22.0	 16
131	 24	101.0	21.3	 16
132	 24	181.8	22.7	 16
133	 24	685.3	68.5	 16
134	 24	562.5	72.5	 16
135	 24	176.0	17.1	 16
136	 24	541.5	42.1	 16
137	 24	125.3	16.2	 16
138	 24	374.8	37.2	 16
139	 24	109.8	17.5	 16
140	 24	62.5	11.9	 16
141	 24	75.8	17.4	 16
142	 24	57.0	9.6	 16
143	 24	71.5	10.5	 16
144	 24	179.5	32.5	 16
145	 24	123.0	13.5	 16
146	 24	308.3	41.3	 16
147	 24	82.0	13.2	 16
148	 24	76.5	18.2	 16
149	 24	65.3	10.9	 16
150	 24	90.3	30.4	 16
151	 24	100.5	19.7	 16
152	 24	67.3	14.8	 16
153	 24	78.3	10.7	 16
154	 24	75.0	16.4	 16
155	 24	91.5	12.7	 16
156	 24	115.0	14.4	 16
157	 24	138.0	19.4	 16
158	 24	171.0	18.8	 16
159	 24	77.3	10.4	 16
160	 24	856.5	108.3	 16
161	 24	533.5	60.2	 16
162	 24	63.5	10.4	 16
163	 24	70.8	11.4	 16
164	 24	256.0	37.0	 16
165	 24	69.3	19.8	 16
166	 24	72.0	13.4	 16
167	 24	165.8	20.6	 16
168	 24	100.3	13.6	 16
169	 24	85.3	16.6	 16
170	 24	135.5	19.5	 16
171	 24	68.5	8.3	 16
172	 24	114.5	20.9	 16
173	 24	1505.8	291.4	 16
174	 24	135.5	20.6	 16
175	 24	65.0	10.9	 16
176	 24	66.5	11.0	 16
177	 24	108.5	14.9	 16
178	 24	76.0	11.7	 20
179	 24	83.3	16.1	 16
180	 24	525.0	59.1	 16
181	 24	265.8	38.7	 16
182	 24	143.8	23.3	 16
183	 24	100.3	19.4	 16
184	 24	176.3	22.0	 16
185	 24	64.3	13.4	 16
186	 24	64.3	10.0	 16
187	 24	92.3	17.0	 16
188	 24	371.0	47.7	 16
189	 24	632.3	72.8	 16
190	 24	239.3	28.6	 16
191	 24	253.5	40.7	 16
192	 24	129.8	21.0	 16
193	 24	124.3	21.9	 16
194	 24	119.3	17.5	 16
195	 24	79.8	15.6	 16
196	 24	272.8	40.1	 16
197	 24	117.8	18.7	 16
198	 24	99.0	13.4	 16
199	 24	83.3	10.2	 16
200	 24	169.3	24.3	 16
201	 24	69.0	12.8	 16
202	 24	70.3	12.9	 16
203	 24	117.3	17.5	 16
204	 24	94.0	13.5	 16
205	 24	81.5	11.4	 16
206	 24	183.3	31.3	 16
207	 24	73.5	11.4	 16
208	 24	73.8	13.8	 16
209	 24	158.0	25.9	 16
210	 24	95.0	16.9	 16
211	 24	96.3	14.4	 16
212	 24	105.3	14.4	 16
213	 24	306.3	36.7	 16
214	 24	63.5	8.8	 16
215	 24	287.0	44.4	 16
216	 24	71.3	16.4	 16
217	 24	66.8	11.7	 16
218	 24	62.0	11.7	 16
219	 24	466.5	66.6	 16
220	 24	85.3	13.5	 16
221	 24	178.3	25.6	 16
222	 24	64.3	10.5	 16
223	 24	62.3	10.0	 16
224	 24	116.0	21.4	 16
225	 24	161.8	29.6	 16
226	 24	85.8	19.8	 16
227	 24	88.3	8.4	 16
228	 24	80.0	16.6	 16
229	 24	80.0	17.4	 16
230	 24	124.0	23.2	 16
231	 24	253.0	33.6	 16
232	 24	1016.0	71.7	 16
233	 24	265.5	20.8	 16
234	 24	66.8	12.2	 16
235	 24	189.5	23.5	 16
236	 24	70.0	13.3	 16
237	 24	66.0	8.9	 16
238	 24	70.0	11.4	 16
239	 24	1053.3	95.9	 16
240	 24	115.8	15.5	 16
241	 24	164.5	38.3	 16
242	 24	81.5	13.4	 16
243	 24	79.3	9.4	 16
244	 24	114.0	24.5	 16
245	 24	107.3	21.4	 16
246	 24	85.5	17.2	 16
247	 24	65.0	9.5	 16
248	 24	116.3	13.9	 16
249	 24	139.3	12.7	 16
250	 24	98.0	18.9	 16
251	 24	65.3	13.5	 16
252	 24	161.0	29.0	 16
253	 24	70.8	10.0	 16
254	 24	68.3	12.6	 16
255	 24	60.8	9.5	 16
256	 24	325.3	33.7	 16
257	 24	167.8	28.2	 16
258	 24	243.8	22.0	 16
259	 24	170.0	28.1	 16
260	 24	1358.0	206.1	 16
261	 24	1554.5	207.7	 16
262	 24	1506.5	187.8	 16
263	 24	146.3	43.4	 16
264	 24	86.3	16.9	 16
265	 24	68.8	12.3	 16
266	 24	96.0	18.4	 16
267	 24	112.8	15.6	 16
268	 24	155.3	23.6	 16
269	 24	128.0	12.9	 16
270	 24	107.8	18.6	 16
271	 24	102.8	17.7	 16
272	 24	293.5	38.4	 16
273	 24	2476.8	209.5	 16
274	 24	70.5	10.5	 16
275	 24	98.0	15.1	 16
276	 24	239.3	43.7	 16
277	 24	65.3	12.2	 16
278	 24	185.5	26.0	 16
279	 24	316.0	57.6	 16
280	 24	96.3	19.6	 16
281	 24	123.8	15.7	 16
282	 24	269.3	39.1	 16
283	 24	367.8	58.0	 16
284	 24	78.0	13.4	 16
285	 24	73.0	13.5	 16
286	 24	80.3	16.0	 16
287	 24	67.8	11.6	 16
288	 24	77.3	17.5	 16
289	 24	903.3	60.6	 16
290	 24	236.0	26.4	 16
291	 24	358.5	38.9	 16
292	 24	392.5	40.0	 16
293	 24	136.0	18.8	 16
294	 24	170.5	23.4	 16
295	 24	115.0	22.6	 16
296	 24	75.3	12.9	 16
297	 24	77.8	10.9	 16
298	 24	104.8	15.5	 16
299	 24	370.0	42.4	 16
300	 24	103.5	15.1	 16
301	 24	68.8	12.2	 16
302	 24	224.5	46.3	 16
303	 24	125.0	16.0	 16
304	 24	161.8	31.8	 16
305	 24	184.0	23.2	 16
306	 24	158.0	32.1	 16
307	 24	163.3	27.8	 16
308	 24	71.0	12.7	 16
309	 24	111.0	24.9	 16
310	 24	176.3	24.1	 16
311	 24	298.3	49.8	 16
312	 24	162.8	24.5	 16
313	 24	105.3	18.9	 16
314	 24	237.0	46.8	 16
315	 24	78.3	16.6	 16
316	 24	101.8	15.5	 16
317	 24	74.3	9.4	 16
318	 24	96.3	16.9	 16
319	 24	73.0	9.9	 16
320	 24	201.3	34.3	 16
321	 24	132.8	25.3	 20
322	 24	113.5	17.2	 16
323	 24	90.5	16.0	 16
324	 24	107.5	21.4	 16
325	 24	212.0	22.0	 16
326	 24	400.3	55.3	 16
327	 24	93.3	20.0	 16
328	 24	428.3	78.8	 16
329	 24	71.0	11.8	 16
330	 24	132.8	24.2	 16
331	 24	77.5	15.9	 16
332	 24	88.0	12.4	 16
333	 24	60.3	8.0	 16
334	 24	63.3	11.5	 16
335	 24	82.0	16.4	 16
336	 24	70.0	12.6	 16
337	 24	79.5	12.5	 16
338	 24	119.8	22.4	 16
339	 24	56.5	10.4	 16
340	 24	99.0	14.8	 16
341	 24	159.5	31.1	 16
342	 24	124.5	22.8	 16
343	 24	250.5	24.9	 16
344	 24	133.8	21.5	 16
345	 24	721.5	52.0	 16
346	 24	209.5	31.3	 16
347	 24	93.8	16.8	 16
348	 24	148.3	19.6	 16
349	 24	204.0	36.2	 16
350	 24	114.3	16.7	 16
351	 24	70.0	15.0	 16
352	 24	85.5	16.4	 16
353	 24	101.3	16.9	 16
354	 24	106.8	16.2	 16
355	 24	88.0	9.8	 16
356	 24	536.8	52.4	 16
357	 24	120.8	21.1	 16
358	 24	239.3	27.0	 16
359	 24	235.5	35.7	 16
360	 24	135.0	20.5	 16
361	 24	617.8	40.8	 16
362	 24	362.8	52.3	 16
363	 24	108.5	19.8	 16
364	 24	157.8	25.1	 16
365	 24	289.0	40.9	 16
366	 24	82.3	16.0	 16
367	 24	77.5	13.6	 16
368	 24	59.3	9.8	 16
369	 24	65.3	12.6	 16
370	 24	131.0	22.9	 16
371	 24	71.8	12.9	 16
372	 24	161.8	24.8	 16
373	 24	213.8	42.5	 16
374	 24	58.3	12.7	 16
375	 24	81.5	16.6	 16
376	 24	79.5	20.4	 16
377	 24	253.0	27.6	 16
378	 24	314.5	36.0	 16
379	 24	507.8	40.7	 16
380	 24	153.5	24.9	 16
381	 24	1096.3	137.0	 16
382	 24	167.0	24.3	 16
383	 24	74.8	12.6	 16
384	 24	95.3	23.0	 16
385	 24	86.3	18.6	 16
386	 24	81.8	15.1	 16
387	 24	176.3	26.9	 16
388	 24	57.5	10.1	 16
389	 24	89.3	13.9	 16
390	 24	103.8	18.9	 16
391	 24	156.5	31.6	 16
392	 24	70.5	16.7	 16
393	 24	83.0	13.8	 16
394	 24	80.5	10.6	 16
395	 24	88.0	25.1	 16
396	 24	74.5	11.3	 16
397	 24	206.0	34.4	 16
398	 24	89.3	12.2	 16
399	 24	153.0	22.9	 16
400	 24	379.5	49.8	 16
401	 24	83.5	13.6	 16
[truncated: 11,162,128 more chars]
