# Supplementary material for: Identify potential drugs for cardiovascular diseases caused by stress-induced genes in vascular smooth muscle cells
Source: PeerJ. 2016 Sep 28;4:e2478. doi: 10.7717/peerj.2478 (PMC5045879; doi:10.7717/peerj.2478)
Supplement: Supplemental Information 4 [file peerj-04-2478-s004.cel]

[CEL]
Version=3

[HEADER]
Cols=712
Rows=712
TotalX=712
TotalY=712
OffsetX=0
OffsetY=0
GridCornerUL=228 232
GridCornerUR=4504 262
GridCornerLR=4484 4533
GridCornerLL=208 4503
Axis-invertX=0
AxisInvertY=0
swapXY=0
DatHeader=[0..46146]  T 2:CLS=4733 RWS=4733 XIN=3  YIN=3  VE=17        2.0 11/22/02 14:49:26       HG-U133A.1sq                  6
Algorithm=Percentile
AlgorithmParameters=Percentile:75;CellMargin:2;OutlierHigh:1.500;OutlierLow:1.004

[INTENSITY]
NumberCells=506944
CellHeader=X	Y	MEAN	STDV	NPIXELS
  0	  0	170.0	24.6	 16
  1	  0	8075.0	1268.1	 16
  2	  0	207.3	24.6	 16
  3	  0	8436.5	1481.2	 16
  4	  0	123.3	17.7	 16
  5	  0	150.5	19.5	 16
  6	  0	7142.5	1163.2	 16
  7	  0	177.5	26.2	 16
  8	  0	7521.5	1281.7	 16
  9	  0	171.3	24.9	 16
 10	  0	7640.3	1450.4	 16
 11	  0	179.0	27.8	 16
 12	  0	7607.8	1276.3	 16
 13	  0	172.3	19.1	 16
 14	  0	7670.3	1191.3	 16
 15	  0	204.8	31.1	 16
 16	  0	7281.0	1149.8	 16
 17	  0	177.3	24.7	 16
 18	  0	7412.0	934.4	 16
 19	  0	163.8	26.7	 16
 20	  0	7420.0	978.1	 16
 21	  0	172.3	28.4	 16
 22	  0	7310.5	730.8	 16
 23	  0	178.8	21.7	 16
 24	  0	7354.3	670.3	 16
 25	  0	192.5	25.4	 16
 26	  0	7480.3	699.0	 16
 27	  0	182.8	26.9	 16
 28	  0	7270.3	745.8	 16
 29	  0	181.0	16.5	 16
 30	  0	7302.3	836.2	 16
 31	  0	186.3	20.4	 16
 32	  0	7193.8	945.2	 16
 33	  0	177.5	19.5	 16
 34	  0	7150.0	1112.1	 16
 35	  0	163.8	21.1	 16
 36	  0	7460.0	1074.4	 16
 37	  0	160.3	19.4	 16
 38	  0	7723.8	826.8	 16
 39	  0	166.5	27.7	 16
 40	  0	7854.5	796.8	 16
 41	  0	183.8	18.1	 16
 42	  0	7423.5	848.7	 16
 43	  0	196.0	29.2	 16
 44	  0	7233.0	684.3	 16
 45	  0	189.0	17.6	 16
 46	  0	7149.8	704.2	 16
 47	  0	181.3	26.7	 16
 48	  0	7219.3	633.1	 16
 49	  0	187.0	33.8	 16
 50	  0	6924.5	672.2	 16
 51	  0	184.0	17.3	 16
 52	  0	6872.5	846.1	 16
 53	  0	197.3	33.0	 16
 54	  0	6954.3	897.7	 16
 55	  0	188.3	29.3	 16
 56	  0	7186.3	1132.4	 16
 57	  0	188.5	27.3	 16
 58	  0	7227.3	1390.6	 16
 59	  0	181.8	30.3	 16
 60	  0	7163.5	878.3	 16
 61	  0	173.8	19.9	 16
 62	  0	7118.0	927.5	 16
 63	  0	195.8	21.4	 16
 64	  0	6832.3	714.6	 16
 65	  0	177.3	14.9	 16
 66	  0	6709.8	778.7	 16
 67	  0	177.8	21.5	 16
 68	  0	6628.8	669.9	 16
 69	  0	191.8	22.6	 16
 70	  0	6436.5	670.7	 16
 71	  0	197.3	31.1	 16
 72	  0	6517.0	758.8	 16
 73	  0	194.0	29.1	 20
 74	  0	6825.5	1326.7	 16
 75	  0	180.3	22.8	 16
 76	  0	7005.0	1383.3	 16
 77	  0	178.3	29.7	 16
 78	  0	6700.5	1294.7	 16
 79	  0	156.3	20.9	 16
 80	  0	6798.0	1369.1	 16
 81	  0	170.3	17.6	 16
 82	  0	6780.8	1368.0	 16
 83	  0	179.5	17.5	 16
 84	  0	6830.3	977.8	 16
 85	  0	173.0	22.7	 16
 86	  0	6788.5	835.5	 16
 87	  0	200.0	23.2	 16
 88	  0	6983.5	737.7	 16
 89	  0	173.3	22.8	 16
 90	  0	6730.0	707.3	 16
 91	  0	176.0	23.4	 16
 92	  0	6628.3	613.5	 16
 93	  0	177.5	16.1	 16
 94	  0	6851.0	599.5	 16
 95	  0	181.3	17.1	 16
 96	  0	6359.0	640.4	 16
 97	  0	193.8	23.6	 16
 98	  0	6602.3	761.5	 16
 99	  0	184.5	18.5	 16
100	  0	6826.8	870.0	 16
101	  0	184.0	23.9	 16
102	  0	6595.5	902.0	 16
103	  0	165.3	22.0	 16
104	  0	6350.5	1030.3	 16
105	  0	190.3	22.8	 16
106	  0	6173.0	1096.9	 16
107	  0	174.8	19.1	 16
108	  0	6213.8	869.2	 16
109	  0	177.5	25.7	 16
110	  0	6404.8	768.2	 16
111	  0	187.0	17.6	 16
112	  0	6337.8	669.8	 16
113	  0	173.8	22.1	 16
114	  0	6401.0	579.7	 16
115	  0	162.3	22.9	 16
116	  0	6140.3	588.0	 16
117	  0	183.5	26.1	 16
118	  0	5839.0	551.5	 16
119	  0	171.3	19.3	 16
120	  0	6148.3	581.3	 16
121	  0	172.5	23.6	 16
122	  0	6158.5	689.7	 16
123	  0	174.0	24.3	 16
124	  0	5880.3	785.0	 16
125	  0	182.3	21.7	 16
126	  0	5976.5	876.0	 16
127	  0	194.0	26.2	 16
128	  0	5715.0	980.8	 16
129	  0	205.5	32.0	 16
130	  0	5551.0	1102.4	 16
131	  0	305.5	389.0	 16
132	  0	5711.0	725.4	 16
133	  0	225.3	43.4	 16
134	  0	5665.0	702.2	 16
135	  0	175.5	22.7	 16
136	  0	5604.8	643.2	 16
137	  0	186.0	27.9	 16
138	  0	5940.8	608.2	 16
139	  0	164.8	20.7	 16
140	  0	5823.5	688.1	 16
141	  0	175.3	30.7	 16
142	  0	5938.3	649.0	 16
143	  0	190.3	21.0	 16
144	  0	5518.0	697.8	 16
145	  0	158.0	21.9	 16
146	  0	5431.0	809.3	 16
147	  0	165.3	13.5	 16
148	  0	5685.8	928.7	 16
149	  0	174.3	32.8	 16
150	  0	5715.0	1098.3	 16
151	  0	196.0	34.7	 16
152	  0	5916.0	1233.4	 16
153	  0	172.5	19.6	 16
154	  0	5806.5	1080.5	 16
155	  0	181.5	18.5	 16
156	  0	5766.3	874.1	 16
157	  0	168.3	24.1	 16
158	  0	5591.5	870.5	 16
159	  0	175.3	26.8	 16
160	  0	5393.0	802.4	 16
161	  0	184.0	26.0	 16
162	  0	4984.0	746.3	 16
163	  0	172.3	24.7	 16
164	  0	4998.5	847.4	 16
165	  0	153.8	20.9	 16
166	  0	4987.5	799.8	 16
167	  0	164.5	17.4	 16
168	  0	5114.5	785.3	 16
169	  0	171.8	28.8	 16
170	  0	5195.5	777.9	 16
171	  0	150.0	19.8	 16
172	  0	5135.3	786.4	 16
173	  0	176.0	25.7	 16
174	  0	5143.0	868.1	 16
175	  0	155.8	16.4	 16
176	  0	5102.5	1010.1	 16
177	  0	161.5	20.7	 16
178	  0	5065.8	857.1	 16
179	  0	182.8	27.5	 16
180	  0	4895.3	820.4	 16
181	  0	156.0	18.9	 16
182	  0	4846.8	776.6	 16
183	  0	163.8	19.9	 16
184	  0	4681.5	766.8	 16
185	  0	166.0	22.2	 16
186	  0	4954.3	608.2	 16
187	  0	153.3	17.3	 16
188	  0	4894.0	670.9	 16
189	  0	153.5	19.5	 16
190	  0	4723.5	564.7	 16
191	  0	159.3	23.7	 16
192	  0	4876.8	676.2	 16
193	  0	162.3	23.3	 16
194	  0	5006.0	726.7	 16
195	  0	166.3	20.0	 16
196	  0	4797.0	804.0	 16
197	  0	166.8	19.9	 16
198	  0	4931.3	926.7	 16
199	  0	153.0	18.1	 16
200	  0	4854.3	994.9	 16
201	  0	151.0	24.9	 16
202	  0	5000.5	822.2	 16
203	  0	170.3	15.3	 16
204	  0	5070.5	730.6	 16
205	  0	168.5	20.1	 16
206	  0	5187.3	762.1	 16
207	  0	161.0	20.4	 16
208	  0	5206.0	768.5	 16
209	  0	165.8	22.8	 16
210	  0	4942.3	751.1	 16
211	  0	157.5	13.4	 16
212	  0	4876.0	768.8	 16
213	  0	151.3	19.9	 16
214	  0	4721.0	654.4	 16
215	  0	150.3	18.9	 20
216	  0	4778.8	885.6	 16
217	  0	151.8	15.7	 16
218	  0	4652.0	876.9	 16
219	  0	149.3	15.9	 16
220	  0	4701.0	1006.4	 16
221	  0	141.3	12.2	 16
222	  0	4770.3	1049.4	 16
223	  0	149.0	20.8	 16
224	  0	4666.3	1068.4	 16
225	  0	134.3	14.4	 16
226	  0	4462.5	936.7	 16
227	  0	137.3	16.1	 16
228	  0	4757.5	928.8	 16
229	  0	159.3	26.2	 16
230	  0	4848.5	929.0	 16
231	  0	142.8	17.4	 16
232	  0	4895.5	915.8	 16
233	  0	159.8	19.3	 16
234	  0	5187.0	841.1	 16
235	  0	80.3	12.2	 16
236	  0	2241.3	394.6	 16
237	  0	70.0	10.3	 16
238	  0	129.0	14.8	 16
239	  0	83.0	14.2	 16
240	  0	5233.5	798.9	 16
241	  0	146.0	14.9	 16
242	  0	4222.5	532.8	 16
243	  0	159.0	24.6	 16
244	  0	4286.0	581.3	 16
245	  0	156.8	17.0	 16
246	  0	4431.8	615.9	 16
247	  0	147.3	14.9	 16
248	  0	4735.8	736.4	 16
249	  0	144.8	26.2	 16
250	  0	4620.8	477.0	 16
251	  0	151.3	23.8	 16
252	  0	4691.0	450.4	 16
253	  0	148.3	19.3	 16
254	  0	4672.5	438.6	 16
255	  0	155.3	18.4	 16
256	  0	4341.5	423.3	 16
257	  0	149.5	25.0	 16
258	  0	4245.0	371.5	 16
259	  0	140.8	18.8	 16
260	  0	4227.8	387.9	 16
261	  0	155.8	21.9	 16
262	  0	4251.0	329.7	 16
263	  0	150.5	12.6	 16
264	  0	4660.8	451.6	 16
265	  0	163.0	20.6	 16
266	  0	4588.0	528.6	 16
267	  0	190.3	15.9	 16
268	  0	4582.5	576.4	 16
269	  0	171.3	21.6	 16
270	  0	4445.8	695.4	 16
271	  0	158.8	18.0	 16
272	  0	4545.0	818.9	 16
273	  0	162.3	16.5	 16
274	  0	4445.0	621.7	 16
275	  0	158.0	26.5	 16
276	  0	4446.3	596.6	 16
277	  0	154.8	24.6	 16
278	  0	4458.5	558.7	 16
279	  0	152.5	21.8	 16
280	  0	4706.8	534.2	 16
281	  0	145.3	17.7	 16
282	  0	5191.3	530.0	 16
283	  0	151.8	19.7	 16
284	  0	5152.0	601.1	 16
285	  0	156.5	17.7	 16
286	  0	4921.0	736.4	 16
287	  0	143.5	17.2	 16
288	  0	4994.3	739.9	 16
289	  0	148.5	22.0	 16
290	  0	4890.5	824.5	 16
291	  0	150.8	19.5	 16
292	  0	4633.0	942.0	 16
293	  0	133.3	23.3	 16
294	  0	4741.8	1037.1	 16
295	  0	156.3	22.8	 16
296	  0	4797.3	1181.1	 16
297	  0	144.0	22.5	 16
298	  0	4974.0	757.1	 16
299	  0	156.3	16.6	 16
300	  0	5055.0	788.5	 16
301	  0	172.5	29.6	 16
302	  0	4994.3	796.9	 16
303	  0	162.5	21.6	 16
304	  0	5208.5	749.5	 16
305	  0	154.3	15.4	 16
306	  0	5539.8	723.3	 16
307	  0	436.8	71.6	 16
308	  0	6040.5	843.5	 16
309	  0	272.3	87.4	 16
310	  0	5585.3	842.0	 16
311	  0	156.8	32.8	 16
312	  0	5279.0	863.4	 16
313	  0	152.3	17.2	 16
314	  0	5564.0	983.0	 16
315	  0	142.8	19.6	 16
316	  0	5456.0	1142.2	 16
317	  0	154.5	28.3	 16
318	  0	5545.3	1256.4	 16
319	  0	136.0	23.1	 16
320	  0	5475.8	955.0	 16
321	  0	143.0	19.1	 16
322	  0	5195.5	827.3	 16
323	  0	140.3	20.4	 16
324	  0	5189.5	871.8	 16
325	  0	139.3	19.8	 16
326	  0	5759.0	761.1	 16
327	  0	144.8	19.0	 16
328	  0	5583.3	617.5	 16
329	  0	141.8	21.5	 16
330	  0	5513.5	676.2	 16
331	  0	158.5	22.7	 16
332	  0	5550.8	639.4	 16
333	  0	131.8	14.8	 16
334	  0	5465.0	711.9	 16
335	  0	138.5	16.5	 16
336	  0	5523.8	765.0	 16
337	  0	143.8	24.7	 16
338	  0	5453.8	846.4	 16
339	  0	136.3	20.6	 16
340	  0	5749.5	1041.0	 16
341	  0	132.8	20.8	 16
342	  0	6054.5	1272.1	 16
343	  0	469.8	125.5	 16
344	  0	6276.5	842.8	 16
345	  0	808.8	116.7	 16
346	  0	6182.3	921.1	 16
347	  0	164.8	31.1	 16
348	  0	5889.0	886.2	 16
349	  0	149.0	16.7	 16
350	  0	5816.0	851.2	 16
351	  0	145.0	13.2	 16
352	  0	5955.8	902.8	 16
353	  0	145.3	15.6	 16
354	  0	5770.3	897.5	 16
355	  0	156.0	22.8	 16
356	  0	5681.5	971.9	 16
357	  0	209.8	33.9	 20
358	  0	5885.5	739.2	 16
359	  0	152.0	19.6	 16
360	  0	5772.0	768.2	 16
361	  0	138.3	20.3	 16
362	  0	5839.0	801.7	 16
363	  0	150.8	24.1	 16
364	  0	5716.8	848.0	 16
365	  0	143.5	25.7	 16
366	  0	5874.5	1017.0	 16
367	  0	125.0	16.6	 16
368	  0	5851.0	712.2	 16
369	  0	136.8	25.4	 16
370	  0	6156.8	735.9	 16
371	  0	142.5	14.8	 16
372	  0	6367.8	676.2	 16
373	  0	134.0	16.0	 16
374	  0	6164.3	561.3	 16
375	  0	145.0	19.1	 16
376	  0	6237.8	553.8	 16
377	  0	135.5	17.7	 16
378	  0	6036.3	563.2	 16
379	  0	141.8	19.1	 16
380	  0	5951.5	547.2	 16
381	  0	134.3	19.2	 16
382	  0	5856.8	544.4	 16
383	  0	151.0	23.9	 16
384	  0	5985.3	646.6	 16
385	  0	143.3	14.1	 16
386	  0	6024.3	765.1	 16
387	  0	136.5	16.3	 16
388	  0	6025.5	785.6	 16
389	  0	140.0	21.6	 16
390	  0	6083.0	949.0	 16
391	  0	133.3	23.5	 16
392	  0	6299.3	591.9	 16
393	  0	130.3	14.9	 16
394	  0	6320.3	483.4	 16
395	  0	140.0	15.0	 16
396	  0	6346.8	413.7	 16
397	  0	149.5	26.2	 16
398	  0	6333.5	448.4	 16
399	  0	137.0	17.7	 16
400	  0	6204.0	424.2	 16
401	  0	141.8	20.2	 16
402	  0	6215.8	446.1	 16
403	  0	130.5	17.1	 16
404	  0	6457.5	505.2	 16
405	  0	139.3	17.7	 16
406	  0	6245.8	543.6	 16
407	  0	121.3	22.4	 16
408	  0	5999.5	612.9	 16
409	  0	136.8	21.3	 16
410	  0	6075.0	790.8	 16
411	  0	138.5	20.0	 16
412	  0	6129.8	859.0	 16
413	  0	138.0	18.9	 16
414	  0	6190.8	1092.2	 16
415	  0	132.3	19.8	 16
416	  0	6553.8	887.1	 16
417	  0	204.0	31.5	 16
418	  0	7801.5	1064.0	 16
419	  0	443.8	57.7	 16
420	  0	8001.5	985.1	 16
421	  0	327.3	50.2	 16
422	  0	6826.3	791.2	 16
423	  0	155.8	28.4	 16
424	  0	6073.5	641.9	 16
425	  0	161.3	51.3	 16
426	  0	5678.5	686.8	 16
427	  0	136.5	15.9	 16
428	  0	6175.3	789.4	 16
429	  0	131.3	20.8	 16
430	  0	6220.5	803.5	 16
431	  0	130.3	21.5	 16
432	  0	6225.3	940.7	 16
433	  0	141.8	21.9	 16
434	  0	6381.8	1126.9	 16
435	  0	135.5	16.3	 16
436	  0	6366.8	1245.6	 16
437	  0	138.0	28.0	 16
438	  0	6752.3	1433.0	 16
439	  0	137.8	14.0	 16
440	  0	6652.3	888.9	 16
441	  0	129.0	12.4	 16
442	  0	6436.3	852.3	 16
443	  0	132.8	17.6	 16
444	  0	6580.3	711.3	 16
445	  0	144.8	21.8	 16
446	  0	6166.0	759.4	 16
447	  0	132.5	25.2	 16
448	  0	6310.5	873.0	 16
449	  0	149.3	20.3	 16
450	  0	6439.0	873.1	 16
451	  0	147.3	21.4	 16
452	  0	6224.8	836.4	 16
453	  0	150.0	18.9	 16
454	  0	6678.0	1090.1	 16
455	  0	136.3	14.5	 16
456	  0	6804.0	1229.6	 16
457	  0	151.8	20.7	 16
458	  0	6666.5	1391.8	 16
459	  0	139.8	19.2	 16
460	  0	6461.3	1409.3	 16
461	  0	143.0	19.7	 16
462	  0	6527.8	1605.9	 16
463	  0	128.0	17.2	 16
464	  0	6615.0	1039.6	 16
465	  0	143.3	25.5	 16
466	  0	6691.3	995.2	 16
467	  0	144.3	23.8	 16
468	  0	6493.3	1005.8	 16
469	  0	139.0	21.9	 16
470	  0	6707.0	1005.5	 16
471	  0	141.8	19.8	 16
472	  0	69.3	10.3	 16
473	  0	4779.5	724.2	 16
474	  0	66.0	12.2	 16
475	  0	117.8	21.1	 16
476	  0	67.5	15.1	 16
477	  0	115.0	14.0	 16
478	  0	6223.5	941.6	 16
479	  0	135.3	20.8	 16
480	  0	6382.3	1078.6	 16
481	  0	128.3	21.7	 16
482	  0	6530.0	1199.2	 16
483	  0	134.5	18.9	 16
484	  0	6453.5	1313.2	 16
485	  0	133.0	15.6	 16
486	  0	6321.0	1430.9	 16
487	  0	144.5	21.7	 16
488	  0	6427.5	909.1	 16
489	  0	143.5	16.4	 16
490	  0	6530.5	808.6	 16
491	  0	140.0	19.0	 16
492	  0	6481.8	575.0	 16
493	  0	138.5	19.8	 16
494	  0	6616.3	601.5	 16
495	  0	141.5	18.3	 16
496	  0	6626.8	650.7	 16
497	  0	139.0	19.9	 16
498	  0	6345.0	656.5	 16
499	  0	145.5	20.8	 16
500	  0	6025.5	1198.4	 20
501	  0	131.0	22.2	 16
502	  0	6209.0	1283.9	 16
503	  0	156.0	24.9	 16
504	  0	6476.5	1308.2	 16
505	  0	144.8	20.9	 16
506	  0	6898.3	1522.5	 16
507	  0	144.5	19.6	 16
508	  0	6814.0	1504.5	 16
509	  0	141.3	22.4	 16
510	  0	6881.8	1129.5	 16
511	  0	133.5	17.4	 16
512	  0	6700.8	982.9	 16
513	  0	140.8	18.6	 16
514	  0	6698.0	904.3	 16
515	  0	148.5	20.3	 16
516	  0	6666.3	820.9	 16
517	  0	134.5	21.5	 16
518	  0	6698.3	717.7	 16
519	  0	141.5	17.3	 16
520	  0	6541.0	703.8	 16
521	  0	129.3	14.9	 16
522	  0	6338.0	636.9	 16
523	  0	119.0	18.3	 16
524	  0	6383.3	664.7	 16
525	  0	131.5	18.7	 16
526	  0	6424.3	799.6	 16
527	  0	145.5	14.7	 16
528	  0	6609.3	963.1	 16
529	  0	130.0	20.0	 16
530	  0	6868.5	1160.9	 16
531	  0	140.3	15.7	 16
532	  0	6618.5	1286.6	 16
533	  0	129.0	19.7	 16
534	  0	6481.3	633.2	 16
535	  0	129.8	15.8	 16
536	  0	6624.8	564.5	 16
537	  0	135.5	21.9	 16
538	  0	6598.8	607.7	 16
539	  0	152.3	18.1	 16
540	  0	6623.5	557.8	 16
541	  0	142.0	27.8	 16
542	  0	6664.3	465.3	 16
543	  0	140.5	31.2	 16
544	  0	6598.3	498.1	 16
545	  0	148.8	13.7	 16
546	  0	6687.8	665.7	 16
547	  0	136.0	12.8	 16
548	  0	6443.5	716.5	 16
549	  0	146.3	21.6	 16
550	  0	6516.3	818.9	 16
551	  0	138.0	15.1	 16
552	  0	6632.5	1043.6	 16
553	  0	125.8	15.8	 16
554	  0	6724.3	1154.6	 16
555	  0	129.0	18.4	 16
556	  0	6991.3	1417.3	 16
557	  0	138.0	27.3	 16
558	  0	6936.3	1032.6	 16
559	  0	148.5	21.3	 16
560	  0	6965.3	1125.8	 16
561	  0	164.0	27.5	 16
562	  0	6755.5	1096.8	 16
563	  0	138.5	18.8	 16
564	  0	6815.0	1240.0	 16
565	  0	142.5	15.5	 16
566	  0	6976.5	1293.0	 16
567	  0	157.5	17.1	 16
568	  0	6888.5	1286.7	 16
569	  0	139.5	15.7	 16
570	  0	6994.8	1399.2	 16
571	  0	137.3	20.0	 16
572	  0	6779.0	1425.5	 16
573	  0	158.0	23.7	 16
574	  0	6643.3	1443.1	 16
575	  0	148.5	20.0	 16
576	  0	6784.3	1516.5	 16
577	  0	140.8	25.3	 16
578	  0	7275.3	1744.4	 16
579	  0	145.8	25.6	 16
580	  0	7168.5	1788.3	 16
581	  0	169.8	27.6	 16
582	  0	6956.8	1498.9	 16
583	  0	166.3	28.5	 16
584	  0	6998.8	1486.2	 16
585	  0	175.0	31.4	 16
586	  0	6544.0	1470.0	 16
587	  0	162.3	27.8	 16
588	  0	6628.0	1524.9	 16
589	  0	157.0	33.9	 16
590	  0	6679.8	1476.9	 16
591	  0	159.5	40.4	 16
592	  0	6298.3	1396.3	 16
593	  0	160.8	34.1	 16
594	  0	6591.5	1402.2	 16
595	  0	137.0	25.5	 16
596	  0	6495.3	1445.5	 16
597	  0	145.3	25.8	 16
598	  0	6584.3	1494.2	 16
599	  0	154.3	29.8	 16
600	  0	6856.0	1537.4	 16
601	  0	147.5	26.5	 16
602	  0	7015.8	1646.6	 16
603	  0	141.0	18.2	 16
604	  0	6872.0	1747.1	 16
605	  0	147.0	23.7	 16
606	  0	6781.0	1355.1	 16
607	  0	156.5	21.6	 16
608	  0	6861.8	1304.1	 16
609	  0	133.3	27.7	 16
610	  0	6657.8	1252.3	 16
611	  0	153.3	20.7	 16
612	  0	6638.3	1253.6	 16
613	  0	158.8	35.3	 16
614	  0	6727.3	1300.1	 16
615	  0	155.0	27.6	 16
616	  0	6790.3	1232.3	 16
617	  0	181.0	28.7	 16
618	  0	6961.8	1337.9	 16
619	  0	172.0	25.4	 16
620	  0	7087.0	1481.4	 16
621	  0	154.5	25.2	 16
622	  0	7113.5	1529.4	 16
623	  0	135.8	23.0	 16
624	  0	7282.0	1624.5	 16
625	  0	132.0	19.2	 16
626	  0	7210.3	1730.3	 16
627	  0	146.0	25.5	 16
628	  0	7040.0	1795.8	 16
629	  0	148.8	19.6	 16
630	  0	6844.5	1179.9	 16
631	  0	143.0	23.1	 16
632	  0	6708.5	1245.3	 16
633	  0	143.5	25.0	 16
634	  0	6769.8	1159.2	 16
635	  0	150.3	23.2	 16
636	  0	6998.5	1249.1	 16
637	  0	172.0	24.9	 16
638	  0	7092.3	1340.0	 16
639	  0	162.5	26.1	 16
640	  0	6884.3	1324.1	 16
641	  0	164.3	18.3	 16
642	  0	6644.0	1349.6	 20
643	  0	170.0	23.3	 16
644	  0	7044.5	908.4	 16
645	  0	133.0	18.7	 16
646	  0	7049.0	1046.5	 16
647	  0	159.5	24.5	 16
648	  0	6973.8	1210.6	 16
649	  0	127.5	18.0	 16
650	  0	6672.3	1290.0	 16
651	  0	151.5	26.1	 16
652	  0	6639.5	1393.0	 16
653	  0	133.5	19.7	 16
654	  0	6654.5	938.1	 16
655	  0	142.0	21.6	 16
656	  0	6837.3	766.1	 16
657	  0	136.5	21.7	 16
658	  0	6579.5	650.8	 16
659	  0	177.3	31.0	 16
660	  0	6424.3	710.6	 16
661	  0	151.3	28.1	 16
662	  0	6545.5	584.4	 16
663	  0	143.0	18.0	 16
664	  0	6530.5	554.6	 16
665	  0	144.5	19.6	 16
666	  0	6354.0	673.7	 16
667	  0	137.3	20.4	 16
668	  0	6500.0	785.4	 16
669	  0	148.8	21.5	 16
670	  0	6454.5	926.0	 16
671	  0	146.8	18.7	 16
672	  0	6598.8	1066.0	 16
673	  0	150.8	23.5	 16
674	  0	6660.8	1216.2	 16
675	  0	133.3	17.9	 16
676	  0	6697.3	783.7	 16
677	  0	159.0	21.2	 16
678	  0	6787.3	763.1	 16
679	  0	154.3	17.2	 16
680	  0	6906.5	550.4	 16
681	  0	158.8	25.7	 16
682	  0	6913.0	558.9	 16
683	  0	163.8	27.2	 16
684	  0	6871.0	557.0	 16
685	  0	151.3	18.2	 16
686	  0	7070.8	645.8	 16
687	  0	136.5	13.2	 16
688	  0	7180.5	689.6	 16
689	  0	137.8	22.4	 16
690	  0	6809.5	748.0	 16
691	  0	140.3	15.6	 16
692	  0	7205.8	951.5	 16
693	  0	147.5	22.2	 16
694	  0	7275.0	1073.7	 16
695	  0	131.8	15.2	 16
696	  0	6717.5	1117.6	 16
697	  0	131.5	26.2	 16
698	  0	6661.3	1217.9	 16
699	  0	131.5	18.1	 16
700	  0	6969.0	901.7	 16
701	  0	147.5	16.6	 16
702	  0	7250.0	724.4	 16
703	  0	135.3	12.5	 16
704	  0	7335.3	626.8	 16
705	  0	141.0	19.0	 16
706	  0	8182.8	830.5	 16
707	  0	73.5	10.6	 16
708	  0	142.8	20.3	 16
709	  0	7604.3	613.2	 16
710	  0	143.3	19.0	 16
711	  0	7908.5	712.7	 16
  0	  1	7813.8	1198.0	 16
  1	  1	194.0	24.9	 16
  2	  1	7463.5	1187.6	 16
  3	  1	187.0	26.8	 16
  4	  1	100.8	13.8	 16
  5	  1	273.5	32.3	 16
  6	  1	176.0	19.5	 16
  7	  1	99.3	16.9	 16
  8	  1	214.5	16.3	 16
  9	  1	122.3	18.1	 16
 10	  1	188.5	28.7	 16
 11	  1	168.8	22.5	 16
 12	  1	153.0	16.7	 16
 13	  1	163.8	25.8	 16
 14	  1	224.5	29.0	 16
 15	  1	203.5	33.3	 16
 16	  1	179.8	23.1	 16
 17	  1	132.8	13.7	 16
 18	  1	125.5	23.4	 16
 19	  1	282.8	27.2	 16
 20	  1	148.3	20.0	 16
 21	  1	113.5	15.1	 16
 22	  1	202.8	22.9	 16
 23	  1	163.5	19.2	 16
 24	  1	376.8	47.5	 16
 25	  1	617.0	43.4	 16
 26	  1	195.0	20.4	 16
 27	  1	432.5	36.0	 16
 28	  1	225.8	19.9	 16
 29	  1	245.5	24.4	 16
 30	  1	137.0	20.0	 16
 31	  1	136.5	18.7	 16
 32	  1	190.5	27.2	 16
 33	  1	148.8	14.9	 16
 34	  1	253.3	30.8	 16
 35	  1	118.0	18.5	 16
 36	  1	218.0	28.7	 16
 37	  1	156.0	29.3	 16
 38	  1	250.5	26.6	 16
 39	  1	245.5	24.1	 16
 40	  1	187.8	25.2	 16
 41	  1	210.3	19.3	 16
 42	  1	808.0	67.5	 16
 43	  1	274.0	39.2	 16
 44	  1	202.5	23.5	 16
 45	  1	671.5	205.8	 16
 46	  1	215.0	26.6	 16
 47	  1	248.3	27.8	 16
 48	  1	199.3	26.1	 16
 49	  1	240.0	25.2	 16
 50	  1	206.8	20.5	 16
 51	  1	248.5	33.1	 16
 52	  1	266.8	36.7	 16
 53	  1	152.8	24.7	 16
 54	  1	144.5	19.4	 16
 55	  1	145.0	22.7	 16
 56	  1	232.0	20.9	 16
 57	  1	260.5	28.0	 16
 58	  1	683.0	99.6	 16
 59	  1	129.3	28.5	 16
 60	  1	195.5	26.3	 16
 61	  1	173.5	14.6	 16
 62	  1	170.8	18.8	 16
 63	  1	124.8	12.9	 16
 64	  1	225.3	27.9	 16
 65	  1	168.5	25.5	 16
 66	  1	273.8	32.0	 16
 67	  1	173.3	16.2	 16
 68	  1	242.8	29.6	 16
 69	  1	118.5	21.3	 16
 70	  1	187.0	21.5	 16
 71	  1	242.3	15.3	 16
 72	  1	185.3	24.5	 16
 73	  1	430.0	47.9	 16
 74	  1	290.3	34.8	 16
 75	  1	131.8	13.4	 16
 76	  1	195.3	18.6	 16
 77	  1	148.5	21.5	 20
 78	  1	170.8	26.4	 16
 79	  1	122.8	15.0	 16
 80	  1	126.5	28.3	 16
 81	  1	128.0	18.8	 16
 82	  1	286.5	38.1	 16
 83	  1	180.0	25.1	 16
 84	  1	152.8	15.0	 16
 85	  1	124.0	17.5	 16
 86	  1	136.3	18.6	 16
 87	  1	509.5	38.6	 16
 88	  1	177.8	36.6	 16
 89	  1	297.5	21.8	 16
 90	  1	156.5	25.9	 16
 91	  1	142.0	13.2	 16
 92	  1	132.3	16.8	 16
 93	  1	210.0	24.8	 16
 94	  1	244.8	29.0	 16
 95	  1	294.3	45.9	 16
 96	  1	148.3	24.0	 16
 97	  1	191.5	25.6	 16
 98	  1	154.0	22.5	 16
 99	  1	233.8	27.5	 16
100	  1	299.0	24.1	 16
101	  1	139.5	46.6	 16
102	  1	121.8	12.7	 16
103	  1	180.8	32.8	 16
104	  1	160.0	19.7	 16
105	  1	186.5	19.4	 16
106	  1	205.5	22.2	 16
107	  1	200.0	19.6	 16
108	  1	186.3	25.7	 16
109	  1	103.5	20.3	 16
110	  1	169.8	23.9	 16
111	  1	320.3	36.3	 16
112	  1	223.8	32.6	 16
113	  1	213.3	27.1	 16
114	  1	311.0	37.2	 16
115	  1	168.5	19.7	 16
116	  1	166.5	14.9	 16
117	  1	165.5	26.6	 16
118	  1	160.5	19.7	 16
119	  1	227.5	28.9	 16
120	  1	260.3	27.4	 16
121	  1	192.0	23.4	 16
122	  1	193.5	30.3	 16
123	  1	213.3	18.9	 16
124	  1	183.3	22.4	 16
125	  1	220.8	26.4	 16
126	  1	183.3	16.6	 16
127	  1	207.3	24.9	 16
128	  1	194.3	25.4	 16
129	  1	124.0	13.0	 16
130	  1	166.5	17.2	 16
131	  1	195.8	26.0	 16
132	  1	258.8	28.0	 16
133	  1	304.0	30.3	 16
134	  1	233.0	43.0	 16
135	  1	176.3	17.5	 16
136	  1	159.3	15.7	 16
137	  1	111.0	17.6	 16
138	  1	129.3	21.7	 16
139	  1	171.3	20.6	 16
140	  1	115.3	22.1	 16
141	  1	126.5	17.9	 16
142	  1	278.5	32.1	 16
143	  1	192.0	23.0	 16
144	  1	405.0	32.4	 16
145	  1	327.3	70.0	 16
146	  1	262.5	25.9	 16
147	  1	147.3	22.0	 16
148	  1	435.8	67.7	 16
149	  1	150.3	18.2	 16
150	  1	163.0	19.1	 16
151	  1	162.8	28.5	 16
152	  1	252.5	30.2	 16
153	  1	196.8	20.7	 16
154	  1	109.5	16.3	 16
155	  1	116.3	20.1	 16
156	  1	435.3	41.1	 16
157	  1	357.8	35.1	 16
158	  1	126.0	14.1	 16
159	  1	188.8	23.2	 16
160	  1	226.0	37.0	 16
161	  1	229.3	18.5	 16
162	  1	154.5	23.9	 16
163	  1	253.3	29.3	 16
164	  1	381.3	54.9	 16
165	  1	186.5	15.6	 16
166	  1	277.0	36.9	 16
167	  1	371.8	35.8	 16
168	  1	197.3	22.1	 16
169	  1	138.0	19.6	 16
170	  1	166.5	18.9	 16
171	  1	172.3	29.1	 16
172	  1	262.8	29.4	 16
173	  1	139.3	21.1	 16
174	  1	164.0	23.5	 16
175	  1	729.0	127.6	 16
176	  1	222.8	24.1	 16
177	  1	135.5	20.4	 16
178	  1	202.0	19.8	 16
179	  1	184.5	28.4	 16
180	  1	199.3	31.0	 16
181	  1	260.5	25.7	 16
182	  1	139.0	15.9	 16
183	  1	138.5	19.5	 16
184	  1	146.3	14.7	 16
185	  1	126.3	18.0	 16
186	  1	169.8	19.4	 16
187	  1	247.5	22.6	 16
188	  1	149.0	14.6	 16
189	  1	524.5	73.4	 16
190	  1	129.0	15.7	 16
191	  1	170.8	18.2	 16
192	  1	318.3	27.6	 16
193	  1	214.3	33.0	 16
194	  1	146.8	22.2	 16
195	  1	177.5	18.3	 16
196	  1	194.0	25.1	 16
197	  1	149.5	22.8	 16
198	  1	177.0	22.1	 16
199	  1	212.0	25.6	 16
200	  1	144.3	22.7	 16
201	  1	123.3	11.4	 16
202	  1	350.8	28.3	 16
203	  1	220.3	15.6	 16
204	  1	129.0	13.8	 16
205	  1	175.3	32.2	 16
206	  1	296.5	49.6	 16
207	  1	177.5	21.9	 16
208	  1	106.8	27.5	 16
209	  1	136.0	21.2	 16
210	  1	125.3	18.6	 16
211	  1	322.5	47.1	 16
212	  1	102.8	17.1	 16
213	  1	118.3	18.5	 16
214	  1	153.5	20.2	 16
215	  1	190.5	18.5	 16
216	  1	129.0	18.5	 16
217	  1	427.5	64.1	 16
218	  1	247.8	41.5	 16
219	  1	146.8	19.4	 20
220	  1	131.0	25.9	 16
221	  1	208.3	26.6	 16
222	  1	118.3	17.4	 16
223	  1	309.0	51.2	 16
224	  1	99.8	14.7	 16
225	  1	105.5	19.9	 16
226	  1	256.0	25.3	 16
227	  1	219.8	27.5	 16
228	  1	269.0	44.4	 16
229	  1	185.3	28.1	 16
230	  1	266.0	30.3	 16
231	  1	133.5	15.0	 16
232	  1	105.3	13.8	 16
233	  1	128.3	12.6	 16
234	  1	121.0	16.4	 16
235	  1	71.0	11.8	 16
236	  1	560.0	89.4	 16
237	  1	75.0	14.0	 16
238	  1	106.8	13.7	 16
239	  1	85.8	15.4	 16
240	  1	143.3	17.6	 16
241	  1	168.3	20.0	 16
242	  1	118.5	11.9	 16
243	  1	204.3	24.2	 16
244	  1	254.3	36.8	 16
245	  1	177.3	25.2	 16
246	  1	167.8	20.3	 16
247	  1	183.3	25.4	 16
248	  1	130.0	22.8	 16
249	  1	165.3	17.1	 16
250	  1	161.3	23.9	 16
251	  1	151.8	18.1	 16
252	  1	93.3	16.0	 16
253	  1	154.3	19.1	 16
254	  1	98.8	9.0	 16
255	  1	126.0	12.6	 16
256	  1	237.0	30.2	 16
257	  1	112.5	11.4	 16
258	  1	175.5	29.4	 16
259	  1	222.0	27.0	 16
260	  1	137.3	24.7	 16
261	  1	246.3	28.6	 16
262	  1	141.0	18.0	 16
263	  1	158.3	22.5	 16
264	  1	215.0	16.9	 16
265	  1	232.3	34.3	 16
266	  1	119.8	19.8	 16
267	  1	196.8	33.6	 16
268	  1	178.0	14.8	 16
269	  1	101.5	16.8	 16
270	  1	100.8	18.5	 16
271	  1	107.5	19.4	 16
272	  1	136.5	21.0	 16
273	  1	568.3	65.5	 16
274	  1	107.0	16.4	 16
275	  1	148.8	19.1	 16
276	  1	782.5	99.8	 16
277	  1	141.3	14.6	 16
278	  1	135.3	16.6	 16
279	  1	174.3	23.5	 16
280	  1	102.0	12.0	 16
281	  1	134.0	21.8	 16
282	  1	161.8	17.9	 16
283	  1	196.8	25.8	 16
284	  1	140.8	25.2	 16
285	  1	200.3	24.3	 16
286	  1	185.8	19.6	 16
287	  1	191.5	17.5	 16
288	  1	121.0	19.3	 16
289	  1	322.3	30.8	 16
290	  1	306.3	31.7	 16
291	  1	108.3	20.6	 16
292	  1	285.0	42.5	 16
293	  1	206.3	31.4	 16
294	  1	196.3	28.6	 16
295	  1	138.3	20.4	 16
296	  1	102.3	20.7	 16
297	  1	114.3	14.3	 16
298	  1	231.5	26.0	 16
299	  1	115.5	10.3	 16
300	  1	121.8	20.9	 16
301	  1	98.0	13.7	 16
302	  1	201.5	28.5	 16
303	  1	263.0	25.0	 16
304	  1	108.5	13.5	 16
305	  1	194.0	30.2	 16
306	  1	249.3	36.7	 16
307	  1	155.5	14.5	 16
308	  1	286.8	67.7	 16
309	  1	277.0	22.1	 16
310	  1	183.3	45.0	 16
311	  1	252.3	39.9	 16
312	  1	108.8	17.5	 16
313	  1	138.0	17.8	 16
314	  1	364.3	72.4	 16
315	  1	223.5	32.4	 16
316	  1	96.5	17.5	 16
317	  1	186.8	23.8	 16
318	  1	142.0	20.5	 16
319	  1	170.3	19.4	 16
320	  1	206.0	25.2	 16
321	  1	181.8	27.0	 16
322	  1	113.0	19.3	 16
323	  1	161.8	12.5	 16
324	  1	195.3	23.5	 16
325	  1	106.5	14.4	 16
326	  1	178.0	33.3	 16
327	  1	134.3	18.5	 16
328	  1	152.8	15.6	 16
329	  1	312.0	45.6	 16
330	  1	176.5	27.0	 16
331	  1	169.5	20.1	 16
332	  1	215.0	34.3	 16
333	  1	257.3	28.0	 16
334	  1	115.3	17.6	 16
335	  1	765.0	123.6	 16
336	  1	187.3	20.3	 16
337	  1	304.0	48.5	 16
338	  1	113.5	15.6	 16
339	  1	94.3	15.9	 16
340	  1	149.0	20.0	 16
341	  1	143.5	35.2	 16
342	  1	218.0	25.8	 16
343	  1	220.5	25.5	 16
344	  1	247.3	21.7	 16
345	  1	501.5	56.5	 16
346	  1	278.5	21.9	 16
347	  1	286.8	33.9	 16
348	  1	357.5	54.5	 16
349	  1	213.8	25.5	 16
350	  1	105.5	13.4	 16
351	  1	85.3	11.9	 16
352	  1	172.8	19.6	 16
353	  1	148.0	17.6	 16
354	  1	6910.0	1140.8	 16
355	  1	576.8	100.2	 16
356	  1	525.5	49.2	 16
357	  1	125.3	19.6	 16
358	  1	135.5	20.0	 16
359	  1	151.3	25.8	 16
360	  1	97.5	16.7	 16
361	  1	76.8	15.2	 20
362	  1	84.3	15.5	 16
363	  1	105.3	20.3	 16
364	  1	111.8	19.5	 16
365	  1	87.5	10.9	 16
366	  1	115.0	10.9	 16
367	  1	124.0	21.0	 16
368	  1	197.8	35.9	 16
369	  1	116.3	15.3	 16
370	  1	132.3	24.0	 16
371	  1	5774.5	706.2	 16
372	  1	191.5	21.1	 16
373	  1	449.0	41.1	 16
374	  1	156.0	17.5	 16
375	  1	170.0	21.9	 16
376	  1	197.8	20.2	 16
377	  1	168.5	20.9	 16
378	  1	277.0	33.2	 16
379	  1	232.8	26.5	 16
380	  1	113.5	16.5	 16
381	  1	216.0	28.2	 16
382	  1	301.5	45.0	 16
383	  1	248.0	33.3	 16
384	  1	170.8	26.7	 16
385	  1	93.3	17.2	 16
386	  1	118.8	19.1	 16
387	  1	96.3	16.1	 16
388	  1	81.0	15.5	 16
389	  1	87.0	13.9	 16
390	  1	115.5	18.5	 16
391	  1	135.5	21.4	 16
392	  1	128.3	20.9	 16
393	  1	86.5	14.4	 16
394	  1	124.0	17.3	 16
395	  1	231.8	19.5	 16
396	  1	319.3	22.2	 16
397	  1	171.5	28.3	 16
398	  1	159.5	25.4	 16
399	  1	199.8	22.1	 16
400	  1	174.3	21.4	 16
401	  1	108.0	14.4	 16
402	  1	187.3	32.2	 16
403	  1	200.3	20.1	 16
404	  1	545.8	56.9	 16
405	  1	493.3	54.6	 16
406	  1	217.3	30.6	 16
407	  1	197.8	16.3	 16
408	  1	216.3	24.2	 16
409	  1	171.8	22.2	 16
410	  1	162.8	19.6	 16
411	  1	202.5	31.5	 16
412	  1	347.8	34.4	 16
413	  1	189.5	27.3	 16
414	  1	171.5	23.2	 16
415	  1	110.3	14.5	 16
416	  1	140.3	17.8	 16
417	  1	411.8	42.3	 16
418	  1	365.5	58.8	 16
419	  1	426.5	34.2	 16
420	  1	686.8	82.4	 16
421	  1	394.3	33.5	 16
422	  1	390.8	41.7	 16
423	  1	476.5	43.3	 16
424	  1	132.8	16.5	 16
425	  1	154.0	20.7	 16
426	  1	156.3	22.1	 16
427	  1	96.3	14.8	 16
428	  1	100.8	12.7	 16
429	  1	216.0	38.1	 16
430	  1	84.0	9.3	 16
431	  1	218.8	24.7	 16
432	  1	267.8	29.7	 16
433	  1	215.8	30.9	 16
434	  1	207.5	27.9	 16
435	  1	134.5	17.5	 16
436	  1	118.3	18.2	 16
437	  1	90.8	17.1	 16
438	  1	99.8	18.6	 16
439	  1	258.0	35.0	 16
440	  1	107.3	16.2	 16
441	  1	161.3	25.5	 16
442	  1	179.0	19.1	 16
443	  1	89.8	12.6	 16
444	  1	138.5	20.8	 16
445	  1	138.0	21.7	 16
446	  1	140.3	32.1	 16
447	  1	82.0	8.6	 16
448	  1	121.5	21.7	 16
449	  1	93.8	13.2	 16
450	  1	135.0	13.7	 16
451	  1	193.0	21.3	 16
452	  1	466.8	37.3	 16
453	  1	409.5	52.1	 16
454	  1	220.5	26.4	 16
455	  1	142.8	21.6	 16
456	  1	556.8	83.9	 16
457	  1	801.8	86.8	 16
458	  1	185.5	26.8	 16
459	  1	108.0	14.1	 16
460	  1	245.8	37.9	 16
461	  1	173.8	28.1	 16
462	  1	95.3	23.3	 16
463	  1	94.0	16.2	 16
464	  1	152.3	17.7	 16
465	  1	465.5	36.8	 16
466	  1	202.0	32.4	 16
467	  1	185.3	23.8	 16
468	  1	202.8	27.0	 16
469	  1	131.5	18.5	 16
470	  1	323.8	32.2	 16
471	  1	92.3	12.0	 16
472	  1	59.3	11.1	 16
473	  1	2047.5	406.9	 16
474	  1	61.3	11.1	 16
475	  1	102.3	15.2	 16
476	  1	67.3	10.8	 16
477	  1	266.5	32.4	 16
478	  1	153.0	20.5	 16
479	  1	102.3	18.2	 16
480	  1	92.5	22.4	 16
481	  1	93.0	14.9	 16
482	  1	469.8	85.4	 16
483	  1	160.3	21.2	 16
484	  1	145.3	24.2	 16
485	  1	264.3	31.0	 16
486	  1	110.5	18.7	 16
487	  1	120.0	18.7	 16
488	  1	84.8	12.5	 16
489	  1	95.8	13.8	 16
490	  1	270.8	29.5	 16
491	  1	162.8	31.9	 16
492	  1	105.5	17.7	 16
493	  1	154.8	18.2	 16
494	  1	171.5	32.6	 16
495	  1	128.5	14.1	 16
496	  1	245.3	29.1	 16
497	  1	211.8	21.7	 16
498	  1	88.8	16.4	 16
499	  1	97.0	19.6	 16
500	  1	88.5	17.3	 16
501	  1	128.0	16.6	 16
502	  1	291.3	50.5	 16
503	  1	128.5	13.6	 16
504	  1	110.0	19.1	 20
505	  1	94.3	11.1	 16
506	  1	308.3	39.0	 16
507	  1	150.8	23.6	 16
508	  1	148.8	23.9	 16
509	  1	137.8	24.8	 16
510	  1	242.3	37.9	 16
511	  1	174.0	15.2	 16
512	  1	89.5	12.1	 16
513	  1	588.3	91.9	 16
514	  1	128.8	15.1	 16
515	  1	151.3	16.3	 16
516	  1	110.8	16.9	 16
517	  1	211.5	27.5	 16
518	  1	487.8	52.8	 16
519	  1	499.3	57.0	 16
520	  1	115.8	17.9	 16
521	  1	83.3	12.0	 16
522	  1	428.3	59.8	 16
523	  1	151.5	23.9	 16
524	  1	383.5	40.7	 16
525	  1	574.8	54.8	 16
526	  1	280.3	30.1	 16
527	  1	167.5	24.6	 16
528	  1	124.8	24.4	 16
529	  1	218.0	33.5	 16
530	  1	463.8	77.5	 16
531	  1	111.8	34.8	 16
532	  1	85.8	21.5	 16
533	  1	129.0	24.4	 16
534	  1	204.8	23.1	 16
535	  1	160.3	19.6	 16
536	  1	84.3	11.6	 16
537	  1	131.5	22.7	 16
538	  1	151.3	17.9	 16
539	  1	129.8	15.7	 16
540	  1	211.8	24.0	 16
541	  1	149.5	18.9	 16
542	  1	591.0	40.1	 16
543	  1	223.5	34.3	 16
544	  1	202.3	23.1	 16
545	  1	114.3	18.2	 16
546	  1	271.3	44.3	 16
547	  1	300.3	38.6	 16
548	  1	94.0	17.0	 16
549	  1	98.3	17.2	 16
550	  1	170.5	20.5	 16
551	  1	131.5	18.8	 16
552	  1	119.0	19.7	 16
553	  1	191.5	32.6	 16
554	  1	106.8	21.6	 16
555	  1	113.3	12.3	 16
556	  1	141.8	22.8	 16
557	  1	191.8	27.3	 16
558	  1	200.3	27.4	 16
559	  1	814.3	112.7	 16
560	  1	3456.5	271.1	 16
561	  1	184.5	59.9	 16
562	  1	397.5	47.7	 16
563	  1	167.5	28.7	 16
564	  1	222.0	24.0	 16
565	  1	190.3	21.4	 16
566	  1	212.3	37.1	 16
567	  1	92.8	20.7	 16
568	  1	726.3	137.3	 16
569	  1	177.3	19.6	 16
570	  1	116.3	17.4	 16
571	  1	88.3	13.5	 16
572	  1	82.0	12.2	 16
573	  1	283.3	49.0	 16
574	  1	114.8	22.4	 16
575	  1	99.8	14.4	 16
576	  1	148.8	26.7	 16
577	  1	111.8	20.8	 16
578	  1	129.3	18.7	 16
579	  1	180.0	24.4	 16
580	  1	193.0	36.0	 16
581	  1	100.3	13.7	 16
582	  1	190.0	19.3	 16
583	  1	279.3	33.4	 16
584	  1	171.3	21.7	 16
585	  1	292.3	63.3	 16
586	  1	152.5	14.9	 16
587	  1	131.3	11.2	 16
588	  1	146.5	22.2	 16
589	  1	199.0	23.9	 16
590	  1	179.5	36.8	 16
591	  1	112.5	17.4	 16
592	  1	360.0	76.0	 16
593	  1	109.5	16.5	 16
594	  1	132.3	21.5	 16
595	  1	101.0	11.8	 16
596	  1	257.0	36.2	 16
597	  1	226.8	28.5	 16
598	  1	234.8	33.6	 16
599	  1	244.0	29.5	 16
600	  1	270.8	45.4	 16
601	  1	206.5	17.3	 16
602	  1	202.0	29.3	 16
603	  1	189.0	28.5	 16
604	  1	440.0	76.0	 16
605	  1	87.5	16.2	 16
606	  1	102.3	16.1	 16
607	  1	150.0	25.1	 16
608	  1	263.0	49.0	 16
609	  1	2489.8	581.3	 16
610	  1	245.0	34.4	 16
611	  1	265.8	40.4	 16
612	  1	99.5	18.9	 16
613	  1	139.0	16.5	 16
614	  1	125.5	15.6	 16
615	  1	120.8	16.9	 16
616	  1	170.5	26.7	 16
617	  1	352.3	44.5	 16
618	  1	188.3	28.7	 16
619	  1	134.0	18.5	 16
620	  1	291.0	31.3	 16
621	  1	188.3	27.1	 16
622	  1	156.3	16.9	 16
623	  1	166.3	22.1	 16
624	  1	165.8	21.2	 16
625	  1	133.5	21.7	 16
626	  1	351.3	52.4	 16
627	  1	202.0	34.5	 16
628	  1	315.0	44.1	 16
629	  1	178.0	28.8	 16
630	  1	251.8	35.0	 16
631	  1	565.3	80.7	 16
632	  1	982.8	151.7	 16
633	  1	970.0	64.9	 16
634	  1	119.0	17.2	 16
635	  1	100.5	10.7	 16
636	  1	128.0	19.6	 16
637	  1	198.0	19.6	 16
638	  1	152.5	16.3	 16
639	  1	193.5	31.3	 16
640	  1	165.0	25.8	 16
641	  1	125.0	17.6	 16
642	  1	135.0	20.6	 16
643	  1	515.8	111.4	 16
644	  1	762.5	160.5	 16
645	  1	100.3	14.7	 16
646	  1	138.5	22.9	 20
647	  1	123.0	17.3	 16
648	  1	91.0	16.3	 16
649	  1	127.0	13.9	 16
650	  1	280.5	43.7	 16
651	  1	108.0	16.3	 16
652	  1	224.3	32.4	 16
653	  1	133.5	18.7	 16
654	  1	124.8	14.8	 16
655	  1	534.3	53.0	 16
656	  1	104.3	14.8	 16
657	  1	258.5	29.2	 16
658	  1	103.5	15.2	 16
659	  1	382.8	41.4	 16
660	  1	125.5	21.0	 16
661	  1	118.8	22.0	 16
662	  1	112.3	19.1	 16
663	  1	224.0	35.5	 16
664	  1	166.8	30.9	 16
665	  1	81.5	14.3	 16
666	  1	80.5	11.6	 16
667	  1	985.0	93.1	 16
668	  1	277.3	23.2	 16
669	  1	233.5	27.1	 16
670	  1	139.5	19.9	 16
671	  1	138.5	16.9	 16
672	  1	243.5	31.2	 16
673	  1	122.3	10.2	 16
674	  1	179.0	18.3	 16
675	  1	310.5	50.7	 16
676	  1	220.3	29.3	 16
677	  1	168.3	25.3	 16
678	  1	168.8	17.2	 16
679	  1	134.0	16.1	 16
680	  1	1561.5	161.9	 16
681	  1	85.0	10.2	 16
682	  1	173.0	27.1	 16
683	  1	184.0	23.2	 16
684	  1	428.3	27.8	 16
685	  1	151.3	17.5	 16
686	  1	224.3	22.7	 16
687	  1	413.0	45.0	 16
688	  1	162.5	16.8	 16
689	  1	109.3	17.9	 16
690	  1	84.3	7.9	 16
691	  1	1179.3	207.0	 16
692	  1	856.5	84.4	 16
693	  1	80.5	14.0	 16
694	  1	115.5	18.6	 16
695	  1	120.0	17.0	 16
696	  1	110.3	17.0	 16
697	  1	144.5	21.2	 16
698	  1	103.5	12.4	 16
699	  1	104.0	19.0	 16
700	  1	89.5	14.2	 16
701	  1	84.5	18.0	 16
702	  1	203.3	27.2	 16
703	  1	187.0	21.3	 16
704	  1	218.3	21.2	 16
705	  1	181.8	31.4	 16
706	  1	104.0	14.1	 16
707	  1	66.3	8.0	 16
708	  1	7415.3	537.3	 16
709	  1	161.3	25.4	 16
710	  1	7104.5	613.8	 16
711	  1	148.5	19.9	 16
  0	  2	177.3	22.8	 16
  1	  2	7378.5	1101.9	 16
  2	  2	191.0	27.3	 16
  3	  2	6929.8	1075.9	 16
  4	  2	118.8	27.5	 16
  5	  2	281.0	27.0	 16
  6	  2	179.5	93.8	 16
  7	  2	123.5	34.8	 16
  8	  2	212.3	28.8	 16
  9	  2	117.5	15.5	 16
 10	  2	157.3	24.7	 16
 11	  2	167.8	20.6	 16
 12	  2	132.3	9.1	 16
 13	  2	145.0	19.6	 16
 14	  2	217.0	19.8	 16
 15	  2	248.3	30.6	 16
 16	  2	267.8	33.4	 16
 17	  2	143.3	17.8	 16
 18	  2	120.0	15.5	 16
 19	  2	340.8	39.7	 16
 20	  2	107.8	15.1	 16
 21	  2	128.3	17.6	 16
 22	  2	144.3	18.4	 16
 23	  2	162.3	18.7	 16
 24	  2	387.0	25.3	 16
 25	  2	606.0	48.5	 16
 26	  2	154.5	26.7	 16
 27	  2	407.0	41.8	 16
 28	  2	313.0	29.8	 16
 29	  2	246.3	41.6	 16
 30	  2	170.3	20.7	 16
 31	  2	118.3	18.8	 16
 32	  2	244.0	28.5	 16
 33	  2	145.3	19.8	 16
 34	  2	348.5	45.3	 16
 35	  2	129.5	17.0	 16
 36	  2	375.8	30.8	 16
 37	  2	143.0	19.6	 16
 38	  2	147.3	27.9	 16
 39	  2	239.3	27.1	 16
 40	  2	204.8	19.5	 16
 41	  2	200.3	25.2	 16
 42	  2	349.0	32.4	 16
 43	  2	206.3	21.1	 16
 44	  2	156.0	16.2	 16
 45	  2	446.8	33.0	 16
 46	  2	181.5	22.1	 16
 47	  2	255.0	25.3	 16
 48	  2	152.0	17.2	 16
 49	  2	230.3	24.3	 16
 50	  2	195.8	24.9	 16
 51	  2	242.3	24.1	 16
 52	  2	154.3	19.0	 16
 53	  2	150.0	21.7	 16
 54	  2	140.5	23.6	 16
 55	  2	162.0	33.9	 16
 56	  2	254.5	26.6	 16
 57	  2	293.8	20.1	 16
 58	  2	254.3	32.8	 16
 59	  2	109.5	13.4	 16
 60	  2	163.3	18.0	 16
 61	  2	160.3	17.5	 16
 62	  2	137.3	27.0	 16
 63	  2	146.0	21.9	 16
 64	  2	211.8	23.6	 16
 65	  2	205.5	38.1	 16
 66	  2	217.3	26.5	 16
 67	  2	149.3	20.5	 16
 68	  2	191.5	30.3	 16
 69	  2	113.3	12.0	 16
 70	  2	162.5	19.4	 16
 71	  2	171.3	25.8	 16
 72	  2	156.3	18.9	 16
 73	  2	215.0	23.0	 16
 74	  2	142.8	15.9	 16
 75	  2	144.3	21.1	 16
 76	  2	186.5	30.2	 16
 77	  2	168.3	16.1	 16
 78	  2	130.0	15.5	 16
 79	  2	115.3	16.2	 16
 80	  2	107.5	14.0	 16
 81	  2	187.5	23.8	 20
 82	  2	275.0	30.0	 16
 83	  2	186.0	18.7	 16
 84	  2	170.3	29.0	 16
 85	  2	112.0	18.7	 16
 86	  2	132.5	19.8	 16
 87	  2	228.3	29.3	 16
 88	  2	134.5	17.8	 16
 89	  2	304.5	25.0	 16
 90	  2	156.8	27.4	 16
 91	  2	146.3	22.9	 16
 92	  2	127.0	15.6	 16
 93	  2	178.8	31.6	 16
 94	  2	193.5	26.0	 16
 95	  2	281.3	28.4	 16
 96	  2	148.8	15.2	 16
 97	  2	139.0	24.7	 16
 98	  2	141.0	15.0	 16
 99	  2	254.8	30.1	 16
100	  2	223.0	29.5	 16
101	  2	133.5	21.4	 16
102	  2	110.5	18.5	 16
103	  2	127.8	15.8	 16
104	  2	166.0	29.7	 16
105	  2	461.5	33.9	 16
106	  2	141.0	15.8	 16
107	  2	163.5	23.1	 16
108	  2	187.5	22.3	 16
109	  2	106.0	14.3	 16
110	  2	179.8	16.6	 16
111	  2	315.8	35.8	 16
112	  2	249.0	44.6	 16
113	  2	155.8	22.6	 16
114	  2	199.8	25.2	 16
115	  2	163.3	19.5	 16
116	  2	156.0	25.2	 16
117	  2	140.8	26.4	 16
118	  2	157.0	19.6	 16
119	  2	256.8	24.3	 16
120	  2	131.0	12.7	 16
121	  2	168.5	17.2	 16
122	  2	124.3	18.0	 16
123	  2	163.0	24.3	 16
124	  2	169.3	17.2	 16
125	  2	243.0	21.7	 16
126	  2	198.5	37.0	 16
127	  2	274.0	21.0	 16
128	  2	251.5	20.6	 16
129	  2	126.8	18.4	 16
130	  2	207.3	19.1	 16
131	  2	183.3	25.3	 16
132	  2	275.0	19.8	 16
133	  2	314.0	45.4	 16
134	  2	193.5	32.0	 16
135	  2	117.3	14.1	 16
136	  2	152.3	17.4	 16
137	  2	131.3	13.6	 16
138	  2	108.8	16.8	 16
139	  2	135.5	16.8	 16
140	  2	130.3	25.1	 16
141	  2	121.0	20.5	 16
142	  2	312.3	35.5	 16
143	  2	141.8	16.8	 16
144	  2	354.0	33.0	 16
145	  2	109.0	14.8	 16
146	  2	160.8	29.7	 16
147	  2	166.3	21.5	 16
148	  2	288.8	39.4	 16
149	  2	150.0	18.5	 16
150	  2	132.5	13.4	 16
151	  2	173.5	23.3	 16
152	  2	161.8	20.3	 16
153	  2	169.3	26.3	 16
154	  2	107.0	15.7	 16
155	  2	119.3	17.5	 16
156	  2	206.8	22.2	 16
157	  2	254.3	37.0	 16
158	  2	148.3	19.5	 16
159	  2	214.3	25.0	 16
160	  2	389.8	32.1	 16
161	  2	263.0	32.0	 16
162	  2	108.3	11.5	 16
163	  2	191.0	30.7	 16
164	  2	181.5	24.3	 16
165	  2	174.5	20.2	 16
166	  2	276.8	30.1	 16
167	  2	357.3	35.9	 16
168	  2	142.3	19.3	 16
169	  2	124.3	17.7	 16
170	  2	191.5	20.3	 16
171	  2	161.5	29.8	 16
172	  2	178.5	86.7	 16
173	  2	127.0	17.8	 16
174	  2	146.3	21.0	 16
175	  2	250.3	30.9	 16
176	  2	212.8	20.4	 16
177	  2	95.0	13.0	 16
178	  2	262.3	26.1	 16
179	  2	186.5	20.8	 16
180	  2	129.0	15.2	 16
181	  2	133.0	23.3	 16
182	  2	126.8	14.4	 16
183	  2	116.8	16.4	 16
184	  2	125.3	13.8	 16
185	  2	127.3	19.8	 16
186	  2	141.3	16.0	 16
187	  2	223.5	31.4	 16
188	  2	123.8	19.2	 16
189	  2	143.8	19.4	 16
190	  2	190.0	28.6	 16
191	  2	158.3	20.9	 16
192	  2	305.3	40.3	 16
193	  2	321.3	49.1	 16
194	  2	143.0	15.5	 16
195	  2	208.0	28.1	 16
196	  2	173.8	30.0	 16
197	  2	132.3	20.4	 16
198	  2	134.8	14.8	 16
199	  2	211.8	31.3	 16
200	  2	143.3	14.7	 16
201	  2	106.0	11.5	 16
202	  2	247.0	37.3	 16
203	  2	178.3	22.6	 16
204	  2	116.8	15.4	 16
205	  2	141.0	13.0	 16
206	  2	215.3	39.9	 16
207	  2	188.0	21.7	 16
208	  2	96.3	13.5	 16
209	  2	119.5	14.4	 16
210	  2	122.8	14.7	 16
211	  2	111.0	15.3	 16
212	  2	97.0	13.0	 16
213	  2	101.5	12.2	 16
214	  2	137.3	18.3	 16
215	  2	176.8	23.0	 16
216	  2	141.3	17.6	 16
217	  2	216.8	22.4	 16
218	  2	280.3	30.0	 16
219	  2	128.8	14.4	 16
220	  2	127.0	16.7	 16
221	  2	204.0	26.7	 16
222	  2	103.5	19.7	 16
223	  2	125.0	17.4	 20
224	  2	106.3	13.6	 16
225	  2	92.8	17.3	 16
226	  2	182.8	24.7	 16
227	  2	171.3	16.1	 16
228	  2	111.5	14.4	 16
229	  2	121.0	21.7	 16
230	  2	235.0	22.8	 16
231	  2	97.8	14.7	 16
232	  2	117.0	21.7	 16
233	  2	114.5	20.0	 16
234	  2	110.0	14.9	 16
235	  2	75.0	12.5	 16
236	  2	319.3	57.8	 16
237	  2	76.0	13.0	 16
238	  2	122.8	15.8	 16
239	  2	74.8	11.6	 16
240	  2	111.0	16.2	 16
241	  2	136.0	12.6	 16
242	  2	107.3	10.2	 16
243	  2	167.8	25.0	 16
244	  2	239.8	27.3	 16
245	  2	193.8	18.8	 16
246	  2	244.0	23.8	 16
247	  2	226.3	38.8	 16
248	  2	122.5	18.8	 16
249	  2	146.3	19.6	 16
250	  2	165.0	25.9	 16
251	  2	143.0	19.0	 16
252	  2	87.3	15.5	 16
253	  2	124.0	17.1	 16
254	  2	117.0	15.6	 16
255	  2	96.0	26.3	 16
256	  2	155.3	18.9	 16
257	  2	99.8	15.3	 16
258	  2	173.5	26.9	 16
259	  2	111.0	13.0	 16
260	  2	95.3	10.7	 16
261	  2	169.3	18.8	 16
262	  2	113.0	22.7	 16
263	  2	158.3	20.8	 16
264	  2	229.0	26.3	 16
265	  2	134.3	19.2	 16
266	  2	127.5	24.5	 16
267	  2	342.3	27.8	 16
268	  2	224.8	33.4	 16
269	  2	104.3	16.4	 16
270	  2	100.0	17.2	 16
271	  2	105.3	13.5	 16
272	  2	123.8	23.2	 16
273	  2	205.3	19.0	 16
274	  2	108.3	19.8	 16
275	  2	213.3	21.5	 16
276	  2	290.8	45.8	 16
277	  2	119.5	13.2	 16
278	  2	146.5	22.4	 16
279	  2	294.0	38.0	 16
280	  2	94.8	11.6	 16
281	  2	101.3	17.8	 16
282	  2	147.5	17.9	 16
283	  2	198.3	20.6	 16
284	  2	124.3	19.2	 16
285	  2	165.3	24.6	 16
286	  2	169.8	18.7	 16
287	  2	170.3	21.7	 16
288	  2	116.3	20.6	 16
289	  2	267.5	30.9	 16
290	  2	285.3	26.0	 16
291	  2	99.5	14.9	 16
292	  2	386.8	45.8	 16
293	  2	239.8	28.2	 16
294	  2	174.5	25.6	 16
295	  2	156.3	21.8	 16
296	  2	104.0	21.1	 16
297	  2	131.3	15.1	 16
298	  2	215.8	36.2	 16
299	  2	111.0	17.3	 16
300	  2	104.8	10.6	 16
301	  2	107.3	16.9	 16
302	  2	158.0	16.5	 16
303	  2	281.0	33.8	 16
304	  2	82.0	8.1	 16
305	  2	112.5	18.0	 16
306	  2	133.5	14.2	 16
307	  2	122.0	13.0	 16
308	  2	163.8	22.4	 16
309	  2	226.3	25.8	 16
310	  2	139.5	24.5	 16
311	  2	199.5	25.5	 16
312	  2	91.0	12.9	 16
313	  2	126.5	12.4	 16
314	  2	115.0	24.8	 16
315	  2	126.0	17.5	 16
316	  2	100.5	17.6	 16
317	  2	191.3	25.0	 16
318	  2	138.0	23.3	 16
319	  2	134.5	15.1	 16
320	  2	204.8	24.5	 16
321	  2	208.3	29.5	 16
322	  2	106.5	14.7	 16
323	  2	135.3	19.6	 16
324	  2	172.3	30.1	 16
325	  2	113.3	18.1	 16
326	  2	132.5	19.8	 16
327	  2	127.0	19.0	 16
328	  2	153.0	17.7	 16
329	  2	539.3	57.1	 16
330	  2	171.5	28.8	 16
331	  2	139.8	14.5	 16
332	  2	105.0	16.4	 16
333	  2	177.8	29.2	 16
334	  2	185.5	32.4	 16
335	  2	142.0	22.2	 16
336	  2	193.0	16.2	 16
337	  2	141.8	22.3	 16
338	  2	100.8	20.4	 16
339	  2	93.3	16.4	 16
340	  2	89.3	14.7	 16
341	  2	115.3	23.0	 16
342	  2	229.0	30.6	 16
343	  2	199.0	19.6	 16
344	  2	206.8	38.1	 16
345	  2	521.0	45.8	 16
346	  2	280.8	53.4	 16
347	  2	272.0	19.6	 16
348	  2	416.3	42.0	 16
349	  2	451.8	49.6	 16
350	  2	116.8	21.9	 16
351	  2	87.5	18.3	 16
352	  2	173.0	24.2	 16
353	  2	117.3	16.5	 16
354	  2	2110.8	421.9	 16
355	  2	216.5	26.9	 16
356	  2	295.5	37.1	 16
357	  2	178.5	27.8	 16
358	  2	109.8	16.8	 16
359	  2	123.3	15.1	 16
360	  2	95.3	12.6	 16
361	  2	77.5	13.5	 16
362	  2	85.3	15.1	 16
363	  2	97.0	15.4	 16
364	  2	99.0	19.3	 16
365	  2	91.0	14.4	 20
366	  2	84.3	15.4	 16
367	  2	103.5	10.5	 16
368	  2	88.3	13.3	 16
369	  2	110.3	19.0	 16
370	  2	112.3	14.0	 16
371	  2	1725.3	336.2	 16
372	  2	181.0	26.1	 16
373	  2	140.0	35.5	 16
374	  2	141.8	16.5	 16
375	  2	127.0	21.1	 16
376	  2	184.5	27.1	 16
377	  2	111.0	19.9	 16
378	  2	159.0	24.4	 16
379	  2	159.0	17.4	 16
380	  2	111.8	22.9	 16
381	  2	112.8	16.1	 16
382	  2	232.0	23.3	 16
383	  2	197.8	18.8	 16
384	  2	123.3	17.6	 16
385	  2	86.5	13.9	 16
386	  2	74.0	8.2	 16
387	  2	91.8	17.1	 16
388	  2	76.5	10.9	 16
389	  2	82.5	13.4	 16
390	  2	102.5	14.9	 16
391	  2	134.5	16.7	 16
392	  2	132.3	22.5	 16
393	  2	83.5	13.1	 16
394	  2	105.5	16.4	 16
395	  2	199.5	22.5	 16
396	  2	284.8	28.1	 16
397	  2	84.8	16.4	 16
398	  2	186.5	22.4	 16
399	  2	182.5	22.1	 16
400	  2	173.0	25.7	 16
401	  2	85.5	12.4	 16
402	  2	171.8	18.0	 16
403	  2	160.0	23.4	 16
404	  2	498.3	35.4	 16
405	  2	519.3	61.4	 16
406	  2	218.8	24.3	 16
407	  2	218.3	33.5	 16
408	  2	179.3	23.2	 16
409	  2	130.0	22.2	 16
410	  2	160.3	22.6	 16
411	  2	145.0	18.0	 16
412	  2	325.0	22.4	 16
413	  2	233.5	62.7	 16
414	  2	297.0	21.5	 16
415	  2	106.0	15.1	 16
416	  2	125.8	15.7	 16
417	  2	164.3	21.4	 16
418	  2	277.8	46.4	 16
419	  2	317.3	37.4	 16
420	  2	444.5	43.3	 16
421	  2	366.5	34.5	 16
422	  2	394.3	32.3	 16
423	  2	532.0	50.8	 16
424	  2	117.3	14.0	 16
425	  2	135.0	19.0	 16
426	  2	97.0	12.5	 16
427	  2	81.3	12.2	 16
428	  2	110.0	16.0	 16
429	  2	91.0	14.1	 16
430	  2	87.0	14.8	 16
431	  2	187.3	28.3	 16
432	  2	251.5	30.8	 16
433	  2	202.3	14.9	 16
434	  2	173.5	20.8	 16
435	  2	119.5	18.5	 16
436	  2	83.5	15.4	 16
437	  2	83.0	13.3	 16
438	  2	69.5	11.0	 16
439	  2	112.5	21.0	 16
440	  2	92.5	15.7	 16
441	  2	178.0	19.5	 16
442	  2	134.0	24.3	 16
443	  2	94.5	13.8	 16
444	  2	106.0	12.5	 16
445	  2	120.5	17.2	 16
446	  2	121.5	15.8	 16
447	  2	81.5	10.8	 16
448	  2	93.3	15.5	 16
449	  2	91.3	12.9	 16
450	  2	126.0	20.4	 16
451	  2	177.3	18.9	 16
452	  2	377.3	41.6	 16
453	  2	352.8	33.5	 16
454	  2	258.3	19.4	 16
455	  2	147.8	21.1	 16
456	  2	500.8	34.9	 16
457	  2	806.3	70.2	 16
458	  2	189.0	33.8	 16
459	  2	91.0	15.0	 16
460	  2	265.8	29.2	 16
461	  2	164.0	21.2	 16
462	  2	77.0	11.9	 16
463	  2	85.3	17.1	 16
464	  2	182.3	27.7	 16
465	  2	414.5	30.1	 16
466	  2	134.5	16.9	 16
467	  2	260.8	34.2	 16
468	  2	196.8	20.6	 16
469	  2	109.8	19.9	 16
470	  2	335.0	35.3	 16
471	  2	88.5	16.3	 16
472	  2	54.5	4.8	 16
473	  2	1143.3	167.2	 16
474	  2	68.5	13.1	 16
475	  2	97.3	14.3	 16
476	  2	70.5	12.2	 16
477	  2	194.3	24.0	 16
478	  2	105.5	15.6	 16
479	  2	103.5	18.0	 16
480	  2	78.5	14.5	 16
481	  2	80.5	11.2	 16
482	  2	146.3	19.8	 16
483	  2	132.5	23.4	 16
484	  2	136.8	17.9	 16
485	  2	190.0	22.5	 16
486	  2	110.5	11.9	 16
487	  2	116.0	23.0	 16
488	  2	89.5	12.5	 16
489	  2	85.3	14.1	 16
490	  2	158.5	25.3	 16
491	  2	118.0	18.4	 16
492	  2	99.3	16.2	 16
493	  2	238.0	42.9	 16
494	  2	117.3	16.4	 16
495	  2	106.3	13.5	 16
496	  2	180.5	29.4	 16
497	  2	348.8	32.7	 16
498	  2	92.8	11.0	 16
499	  2	90.8	14.9	 16
500	  2	101.0	12.5	 16
501	  2	144.0	19.3	 16
502	  2	139.3	16.5	 16
503	  2	111.3	14.2	 16
504	  2	93.5	15.6	 16
505	  2	88.8	16.4	 16
506	  2	312.5	35.3	 16
507	  2	174.0	15.2	 16
508	  2	112.0	17.3	 20
509	  2	163.0	20.4	 16
510	  2	177.3	21.1	 16
511	  2	162.0	27.6	 16
512	  2	83.5	12.8	 16
513	  2	267.3	43.6	 16
514	  2	167.5	21.9	 16
515	  2	96.3	14.6	 16
516	  2	88.0	18.4	 16
517	  2	168.8	24.7	 16
518	  2	301.0	35.8	 16
519	  2	231.8	34.1	 16
520	  2	80.8	9.1	 16
521	  2	76.0	13.8	 16
522	  2	112.3	17.5	 16
523	  2	102.8	20.0	 16
524	  2	767.0	61.2	 16
525	  2	425.3	38.9	 16
526	  2	327.0	27.1	 16
527	  2	153.8	27.1	 16
528	  2	113.0	14.9	 16
529	  2	151.8	19.8	 16
530	  2	153.3	26.9	 16
531	  2	83.5	12.9	 16
532	  2	70.0	8.3	 16
533	  2	181.5	20.9	 16
534	  2	144.0	18.4	 16
535	  2	87.8	15.8	 16
536	  2	79.8	13.4	 16
537	  2	117.5	20.7	 16
538	  2	142.8	19.4	 16
539	  2	127.3	18.7	 16
540	  2	159.5	14.1	 16
541	  2	132.0	18.7	 16
542	  2	197.8	24.3	 16
543	  2	385.8	37.4	 16
544	  2	224.5	39.0	 16
545	  2	196.8	32.6	 16
546	  2	129.5	15.9	 16
547	  2	171.3	27.4	 16
548	  2	71.0	9.4	 16
549	  2	100.3	15.6	 16
550	  2	117.5	14.7	 16
551	  2	109.8	14.3	 16
552	  2	122.0	17.2	 16
553	  2	136.8	15.2	 16
554	  2	88.3	10.6	 16
555	  2	86.0	10.7	 16
556	  2	123.3	20.3	 16
557	  2	171.8	22.9	 16
558	  2	168.5	19.3	 16
559	  2	453.8	52.3	 16
560	  2	3286.8	288.4	 16
561	  2	191.8	38.9	 16
562	  2	221.0	29.2	 16
563	  2	134.3	17.3	 16
564	  2	187.8	21.0	 16
565	  2	187.5	20.0	 16
566	  2	132.5	16.6	 16
567	  2	106.5	15.7	 16
568	  2	169.3	26.2	 16
569	  2	156.5	24.5	 16
570	  2	100.3	12.2	 16
571	  2	86.5	10.6	 16
572	  2	89.3	15.8	 16
573	  2	247.3	37.8	 16
574	  2	106.5	17.0	 16
575	  2	97.5	11.6	 16
576	  2	133.3	16.6	 16
577	  2	86.3	9.3	 16
578	  2	121.5	21.4	 16
579	  2	145.0	19.2	 16
580	  2	173.5	23.6	 16
581	  2	118.3	15.9	 16
582	  2	205.3	34.7	 16
583	  2	299.5	34.2	 16
584	  2	139.3	19.6	 16
585	  2	128.3	20.6	 16
586	  2	135.0	15.7	 16
587	  2	132.3	22.0	 16
588	  2	133.0	19.2	 16
589	  2	202.5	23.5	 16
590	  2	190.0	30.3	 16
591	  2	94.0	18.4	 16
592	  2	141.0	25.4	 16
593	  2	108.3	20.6	 16
594	  2	108.0	16.7	 16
595	  2	93.3	17.5	 16
596	  2	218.3	31.6	 16
597	  2	284.8	25.4	 16
598	  2	289.8	34.1	 16
599	  2	266.5	26.9	 16
600	  2	205.0	32.0	 16
601	  2	207.3	22.5	 16
602	  2	160.3	22.1	 16
603	  2	127.5	20.7	 16
604	  2	133.3	18.8	 16
605	  2	87.3	10.2	 16
606	  2	73.3	10.9	 16
607	  2	91.0	15.3	 16
608	  2	156.5	27.2	 16
609	  2	398.5	98.7	 16
610	  2	164.3	21.9	 16
611	  2	69.0	11.0	 16
612	  2	123.3	20.9	 16
613	  2	102.8	22.0	 16
614	  2	143.3	15.5	 16
615	  2	96.8	12.3	 16
616	  2	94.8	13.9	 16
617	  2	120.3	13.2	 16
618	  2	138.3	19.7	 16
619	  2	98.0	13.5	 16
620	  2	275.8	31.9	 16
621	  2	133.5	16.9	 16
622	  2	168.0	22.5	 16
623	  2	128.5	15.6	 16
624	  2	154.5	19.0	 16
625	  2	129.5	23.2	 16
626	  2	234.0	26.1	 16
627	  2	123.0	15.5	 16
628	  2	605.8	83.1	 16
629	  2	129.5	19.1	 16
630	  2	181.3	24.5	 16
631	  2	104.3	13.2	 16
632	  2	224.0	32.5	 16
633	  2	206.0	34.1	 16
634	  2	105.5	18.3	 16
635	  2	95.0	13.6	 16
636	  2	143.8	10.9	 16
637	  2	193.8	18.4	 16
638	  2	140.3	21.9	 16
639	  2	112.3	16.2	 16
640	  2	167.5	19.0	 16
641	  2	129.5	20.6	 16
642	  2	132.5	15.9	 16
643	  2	182.0	17.9	 16
644	  2	261.3	19.8	 16
645	  2	81.0	15.0	 16
646	  2	128.5	26.1	 16
647	  2	190.3	30.8	 16
648	  2	106.3	13.7	 16
649	  2	116.5	17.1	 16
650	  2	245.0	27.9	 20
651	  2	99.0	9.3	 16
652	  2	153.0	16.0	 16
653	  2	127.5	20.2	 16
654	  2	111.8	16.1	 16
655	  2	213.0	25.5	 16
656	  2	104.0	16.2	 16
657	  2	243.8	27.6	 16
658	  2	84.0	14.9	 16
659	  2	210.0	24.8	 16
660	  2	124.3	20.6	 16
661	  2	107.8	15.5	 16
662	  2	91.5	11.8	 16
663	  2	133.3	19.2	 16
664	  2	125.3	17.5	 16
665	  2	77.3	11.1	 16
666	  2	79.0	9.2	 16
667	  2	543.5	42.8	 16
668	  2	138.0	14.0	 16
669	  2	142.5	17.1	 16
670	  2	107.3	16.4	 16
671	  2	131.3	19.5	 16
672	  2	139.8	15.5	 16
673	  2	143.5	13.7	 16
674	  2	321.3	39.5	 16
675	  2	141.5	24.7	 16
676	  2	185.5	26.4	 16
677	  2	203.3	24.8	 16
678	  2	148.3	22.2	 16
679	  2	193.5	29.4	 16
680	  2	502.8	82.1	 16
681	  2	91.0	12.3	 16
682	  2	110.5	17.3	 16
683	  2	159.0	20.7	 16
684	  2	402.5	42.4	 16
685	  2	110.5	17.5	 16
686	  2	296.5	33.9	 16
687	  2	139.5	13.3	 16
688	  2	154.5	20.3	 16
689	  2	83.3	15.9	 16
690	  2	83.8	10.8	 16
691	  2	246.3	36.6	 16
692	  2	343.0	38.1	 16
693	  2	92.3	12.1	 16
694	  2	103.5	10.5	 16
695	  2	95.3	17.0	 16
696	  2	97.8	18.5	 16
697	  2	134.3	17.8	 16
698	  2	104.3	16.5	 16
699	  2	78.3	12.8	 16
700	  2	82.5	9.3	 16
701	  2	84.5	14.5	 16
702	  2	249.3	21.5	 16
703	  2	211.0	27.0	 16
704	  2	201.3	17.8	 16
705	  2	180.5	18.8	 16
706	  2	103.3	17.5	 16
707	  2	74.0	16.7	 16
708	  2	145.0	19.7	 16
709	  2	6835.5	494.3	 16
710	  2	151.3	25.6	 16
711	  2	7819.0	709.0	 16
  0	  3	8491.8	1266.0	 16
  1	  3	188.8	35.1	 16
  2	  3	7772.8	1223.8	 16
  3	  3	184.3	29.8	 16
  4	  3	83.5	11.7	 16
  5	  3	229.0	34.9	 16
  6	  3	125.3	19.3	 16
  7	  3	260.0	35.0	 16
  8	  3	114.8	16.3	 16
  9	  3	210.8	22.1	 16
 10	  3	173.0	26.8	 16
 11	  3	307.8	37.7	 16
 12	  3	185.0	25.7	 16
 13	  3	235.8	21.8	 16
 14	  3	170.3	15.4	 16
 15	  3	160.8	16.0	 16
 16	  3	280.5	48.6	 16
 17	  3	318.8	25.6	 16
 18	  3	505.5	58.6	 16
 19	  3	266.3	34.1	 16
 20	  3	159.3	14.3	 16
 21	  3	128.8	22.5	 16
 22	  3	261.0	30.1	 16
 23	  3	1190.3	179.3	 16
 24	  3	131.8	14.0	 16
 25	  3	229.0	36.6	 16
 26	  3	194.8	18.6	 16
 27	  3	187.3	18.5	 16
 28	  3	202.8	24.7	 16
 29	  3	185.5	21.8	 16
 30	  3	182.0	20.8	 16
 31	  3	259.3	38.7	 16
 32	  3	165.5	15.4	 16
 33	  3	295.5	49.0	 16
 34	  3	169.5	26.9	 16
 35	  3	189.5	25.2	 16
 36	  3	239.0	32.3	 16
 37	  3	532.3	33.9	 16
 38	  3	256.5	33.4	 16
 39	  3	157.0	21.2	 16
 40	  3	190.3	18.2	 16
 41	  3	495.3	51.3	 16
 42	  3	413.8	34.7	 16
 43	  3	189.8	41.6	 16
 44	  3	184.5	19.0	 16
 45	  3	138.5	16.9	 16
 46	  3	230.5	23.5	 16
 47	  3	285.5	36.4	 16
 48	  3	111.0	14.1	 16
 49	  3	152.5	17.0	 16
 50	  3	183.0	27.4	 16
 51	  3	231.8	33.1	 16
 52	  3	246.5	27.1	 16
 53	  3	176.0	26.7	 16
 54	  3	152.0	23.1	 16
 55	  3	255.5	39.2	 16
 56	  3	289.0	18.8	 16
 57	  3	286.8	43.6	 16
 58	  3	196.3	28.6	 16
 59	  3	263.3	32.1	 16
 60	  3	141.5	22.5	 16
 61	  3	260.0	19.4	 16
 62	  3	286.5	35.2	 16
 63	  3	155.3	16.4	 16
 64	  3	2327.0	318.6	 16
 65	  3	205.5	31.8	 16
 66	  3	178.3	22.1	 16
 67	  3	299.3	36.0	 16
 68	  3	121.8	14.3	 16
 69	  3	177.0	20.9	 16
 70	  3	268.3	32.0	 16
 71	  3	210.3	23.8	 16
 72	  3	209.0	31.2	 16
 73	  3	580.3	65.4	 16
 74	  3	301.3	33.8	 16
 75	  3	124.5	14.0	 16
 76	  3	110.0	15.1	 16
 77	  3	139.8	13.7	 16
 78	  3	254.3	26.4	 16
 79	  3	167.0	25.8	 16
 80	  3	131.0	10.6	 16
 81	  3	134.8	19.1	 16
 82	  3	121.8	17.6	 16
 83	  3	379.3	32.7	 16
 84	  3	256.0	23.8	 16
 85	  3	161.3	20.0	 20
 86	  3	149.3	22.5	 16
 87	  3	152.0	16.5	 16
 88	  3	288.0	27.3	 16
 89	  3	254.0	28.0	 16
 90	  3	218.5	32.3	 16
 91	  3	419.0	53.3	 16
 92	  3	425.5	38.3	 16
 93	  3	399.3	47.4	 16
 94	  3	423.3	46.1	 16
 95	  3	395.0	46.5	 16
 96	  3	305.0	35.1	 16
 97	  3	418.3	45.8	 16
 98	  3	230.3	36.2	 16
 99	  3	121.5	13.4	 16
100	  3	151.3	18.6	 16
101	  3	402.3	44.4	 16
102	  3	115.0	12.2	 16
103	  3	408.8	58.2	 16
104	  3	155.8	23.4	 16
105	  3	147.0	15.5	 16
106	  3	136.5	19.7	 16
107	  3	277.3	31.0	 16
108	  3	147.0	21.4	 16
109	  3	212.0	28.0	 16
110	  3	169.3	29.8	 16
111	  3	216.0	23.8	 16
112	  3	202.3	23.7	 16
113	  3	382.3	37.3	 16
114	  3	207.0	17.1	 16
115	  3	187.8	21.8	 16
116	  3	206.0	34.2	 16
117	  3	189.5	22.0	 16
118	  3	226.3	26.2	 16
119	  3	289.3	29.4	 16
120	  3	165.3	20.7	 16
121	  3	296.0	37.5	 16
122	  3	184.3	28.3	 16
123	  3	112.5	15.3	 16
124	  3	126.0	11.7	 16
125	  3	146.3	17.1	 16
126	  3	169.8	22.9	 16
127	  3	135.5	25.4	 16
128	  3	106.0	14.1	 16
129	  3	112.8	15.9	 16
130	  3	359.0	49.7	 16
131	  3	298.3	26.9	 16
132	  3	309.8	38.7	 16
133	  3	152.0	19.2	 16
134	  3	274.8	32.0	 16
135	  3	326.3	34.0	 16
136	  3	784.3	68.2	 16
137	  3	155.5	24.0	 16
138	  3	302.8	28.2	 16
139	  3	580.3	68.2	 16
140	  3	137.3	19.2	 16
141	  3	134.5	24.3	 16
142	  3	753.0	89.5	 16
143	  3	458.5	48.5	 16
144	  3	124.0	18.5	 16
145	  3	147.3	18.6	 16
146	  3	3309.0	538.0	 16
147	  3	509.3	33.1	 16
148	  3	292.8	34.1	 16
149	  3	152.8	21.3	 16
150	  3	122.3	19.8	 16
151	  3	301.3	44.2	 16
152	  3	303.5	60.1	 16
153	  3	178.0	26.2	 16
154	  3	109.0	16.5	 16
155	  3	720.0	89.0	 16
156	  3	141.5	29.6	 16
157	  3	149.0	20.6	 16
158	  3	98.3	16.1	 16
159	  3	197.3	27.7	 16
160	  3	213.8	19.5	 16
161	  3	416.5	48.8	 16
162	  3	2500.8	389.2	 16
163	  3	290.0	45.9	 16
164	  3	255.5	28.4	 16
165	  3	284.8	36.2	 16
166	  3	159.3	27.6	 16
167	  3	225.3	18.1	 16
168	  3	665.0	126.5	 16
169	  3	142.3	15.7	 16
170	  3	142.5	17.2	 16
171	  3	106.8	15.4	 16
172	  3	144.5	23.2	 16
173	  3	107.5	16.4	 16
174	  3	120.8	17.8	 16
175	  3	100.5	14.6	 16
176	  3	1080.8	275.8	 16
177	  3	103.0	10.4	 16
178	  3	117.0	20.6	 16
179	  3	214.5	33.8	 16
180	  3	234.5	31.8	 16
181	  3	113.0	13.1	 16
182	  3	137.0	21.5	 16
183	  3	149.0	23.4	 16
184	  3	136.5	17.7	 16
185	  3	168.3	21.8	 16
186	  3	121.0	18.7	 16
187	  3	105.0	17.4	 16
188	  3	100.5	13.7	 16
189	  3	123.0	18.5	 16
190	  3	154.0	17.1	 16
191	  3	227.5	24.5	 16
192	  3	244.5	39.3	 16
193	  3	168.5	22.2	 16
194	  3	216.8	26.7	 16
195	  3	320.3	41.9	 16
196	  3	176.5	20.9	 16
197	  3	182.5	33.8	 16
198	  3	176.3	22.5	 16
199	  3	174.3	19.0	 16
200	  3	173.5	20.7	 16
201	  3	287.0	62.2	 16
202	  3	1032.3	163.1	 16
203	  3	125.0	13.6	 16
204	  3	119.3	11.8	 16
205	  3	148.8	21.8	 16
206	  3	126.3	22.7	 16
207	  3	281.5	22.7	 16
208	  3	120.3	18.9	 16
209	  3	175.0	19.6	 16
210	  3	140.8	25.7	 16
211	  3	98.8	12.3	 16
212	  3	110.3	16.7	 16
213	  3	115.8	15.0	 16
214	  3	98.0	11.4	 16
215	  3	229.0	30.8	 16
216	  3	108.8	17.4	 16
217	  3	200.0	29.2	 16
218	  3	195.3	27.0	 16
219	  3	166.0	23.1	 16
220	  3	169.0	23.0	 16
221	  3	150.5	22.1	 16
222	  3	96.3	12.5	 16
223	  3	147.3	16.5	 16
224	  3	99.3	19.0	 16
225	  3	142.8	16.9	 16
226	  3	156.0	22.6	 16
227	  3	134.0	16.9	 20
228	  3	141.0	17.6	 16
229	  3	113.8	15.6	 16
230	  3	493.0	115.0	 16
231	  3	191.3	33.5	 16
232	  3	92.3	13.6	 16
233	  3	161.0	38.5	 16
234	  3	107.5	16.7	 16
235	  3	69.5	11.7	 16
236	  3	61.8	9.7	 16
237	  3	79.0	15.8	 16
238	  3	67.3	10.3	 16
239	  3	85.0	13.9	 16
240	  3	190.3	23.3	 16
241	  3	139.5	17.4	 16
242	  3	115.5	16.6	 16
243	  3	315.0	38.1	 16
244	  3	154.3	19.8	 16
245	  3	171.5	20.2	 16
246	  3	210.3	24.5	 16
247	  3	114.5	14.8	 16
248	  3	99.0	13.5	 16
249	  3	96.3	10.7	 16
250	  3	157.8	19.6	 16
251	  3	162.3	25.9	 16
252	  3	205.8	21.1	 16
253	  3	110.0	19.4	 16
254	  3	97.0	17.2	 16
255	  3	224.0	23.7	 16
256	  3	137.0	18.9	 16
257	  3	109.0	19.4	 16
258	  3	368.3	57.6	 16
259	  3	158.5	30.4	 16
260	  3	91.5	10.1	 16
261	  3	88.3	7.9	 16
262	  3	90.3	20.0	 16
263	  3	133.0	14.9	 16
264	  3	360.5	49.5	 16
265	  3	180.8	31.2	 16
266	  3	207.0	24.2	 16
267	  3	127.0	26.1	 16
268	  3	111.0	21.6	 16
269	  3	279.8	52.6	 16
270	  3	311.0	60.2	 16
271	  3	150.0	23.9	 16
272	  3	127.3	16.5	 16
273	  3	380.5	42.2	 16
274	  3	697.0	89.6	 16
275	  3	210.8	13.9	 16
276	  3	144.3	18.9	 16
277	  3	194.8	17.3	 16
278	  3	158.3	21.5	 16
279	  3	153.0	20.1	 16
280	  3	146.8	22.7	 16
281	  3	83.3	12.1	 16
282	  3	202.3	19.9	 16
283	  3	170.3	26.0	 16
284	  3	136.5	18.8	 16
285	  3	201.5	31.4	 16
286	  3	151.5	19.9	 16
287	  3	136.8	17.9	 16
288	  3	205.5	20.0	 16
289	  3	134.0	17.6	 16
290	  3	159.3	27.2	 16
291	  3	110.5	16.1	 16
292	  3	175.5	21.2	 16
293	  3	833.3	122.3	 16
294	  3	247.8	32.2	 16
295	  3	125.5	14.1	 16
296	  3	180.5	24.8	 16
297	  3	1415.0	162.3	 16
298	  3	432.0	56.1	 16
299	  3	446.5	49.9	 16
300	  3	261.0	26.7	 16
301	  3	195.3	20.9	 16
302	  3	128.3	15.6	 16
303	  3	109.8	13.3	 16
304	  3	171.8	31.8	 16
305	  3	92.3	15.3	 16
306	  3	109.3	12.5	 16
307	  3	133.0	19.1	 16
308	  3	139.3	13.9	 16
309	  3	2491.8	451.7	 16
310	  3	2569.5	388.9	 16
311	  3	193.3	28.8	 16
312	  3	255.3	29.1	 16
313	  3	308.3	38.0	 16
314	  3	169.5	27.7	 16
315	  3	207.3	23.3	 16
316	  3	627.3	112.2	 16
317	  3	255.8	38.2	 16
318	  3	135.5	21.4	 16
319	  3	103.3	19.6	 16
320	  3	185.0	19.9	 16
321	  3	204.3	43.7	 16
322	  3	116.3	14.4	 16
323	  3	189.3	32.7	 16
324	  3	258.0	27.8	 16
325	  3	178.5	25.1	 16
326	  3	509.0	80.5	 16
327	  3	121.5	20.5	 16
328	  3	174.0	19.8	 16
329	  3	388.5	58.2	 16
330	  3	112.0	14.5	 16
331	  3	100.8	18.5	 16
332	  3	81.0	11.6	 16
333	  3	92.3	11.3	 16
334	  3	119.0	16.8	 16
335	  3	94.0	15.7	 16
336	  3	90.3	11.0	 16
337	  3	105.3	17.9	 16
338	  3	102.3	12.5	 16
339	  3	92.8	11.7	 16
340	  3	111.5	11.5	 16
341	  3	1719.5	407.3	 16
342	  3	159.0	19.1	 16
343	  3	170.3	22.4	 16
344	  3	190.8	25.9	 16
345	  3	220.8	29.6	 16
346	  3	189.8	15.8	 16
347	  3	128.8	23.3	 16
348	  3	699.5	64.5	 16
349	  3	349.5	34.2	 16
350	  3	136.0	16.9	 16
351	  3	122.5	18.2	 16
352	  3	124.3	18.4	 16
353	  3	101.8	17.6	 16
354	  3	190.5	27.4	 16
355	  3	126.0	12.7	 16
356	  3	115.0	13.1	 16
357	  3	233.8	35.0	 16
358	  3	93.5	16.2	 16
359	  3	132.5	19.1	 16
360	  3	119.3	17.4	 16
361	  3	927.5	255.7	 16
362	  3	1151.3	236.7	 16
363	  3	1028.0	221.9	 16
364	  3	144.8	20.2	 16
365	  3	165.3	26.4	 16
366	  3	98.5	19.4	 16
367	  3	105.3	17.5	 16
368	  3	112.0	16.1	 16
369	  3	135.5	21.2	 20
370	  3	118.8	17.9	 16
371	  3	352.0	40.2	 16
372	  3	158.3	17.9	 16
373	  3	515.3	70.5	 16
374	  3	142.0	21.3	 16
375	  3	129.5	15.7	 16
376	  3	242.3	36.2	 16
377	  3	128.0	23.0	 16
378	  3	195.0	27.9	 16
379	  3	154.0	19.2	 16
380	  3	156.8	27.2	 16
381	  3	861.3	59.2	 16
382	  3	485.0	48.1	 16
383	  3	465.3	57.8	 16
384	  3	100.3	12.2	 16
385	  3	97.3	9.4	 16
386	  3	96.0	12.8	 16
387	  3	271.0	31.0	 16
388	  3	94.0	12.5	 16
389	  3	195.3	30.4	 16
390	  3	155.3	20.7	 16
391	  3	75.3	12.7	 16
392	  3	140.5	22.0	 16
393	  3	133.0	19.0	 16
394	  3	256.8	26.1	 16
395	  3	142.3	15.5	 16
396	  3	570.3	49.0	 16
397	  3	117.3	16.6	 16
398	  3	101.0	11.2	 16
399	  3	101.3	20.0	 16
400	  3	513.8	52.7	 16
401	  3	292.3	39.7	 16
402	  3	184.3	26.0	 16
403	  3	76.3	10.4	 16
404	  3	99.3	14.2	 16
405	  3	244.5	34.0	 16
406	  3	148.3	16.5	 16
407	  3	139.5	19.0	 16
408	  3	125.8	15.8	 16
409	  3	221.5	30.7	 16
410	  3	200.3	23.4	 16
411	  3	349.3	34.6	 16
412	  3	203.5	27.6	 16
413	  3	681.8	93.8	 16
414	  3	101.3	13.9	 16
415	  3	110.3	20.4	 16
416	  3	140.8	14.2	 16
417	  3	122.8	16.4	 16
418	  3	153.8	23.4	 16
419	  3	187.3	17.2	 16
420	  3	195.8	26.5	 16
421	  3	613.3	64.4	 16
422	  3	419.0	52.5	 16
423	  3	174.3	27.7	 16
424	  3	113.8	18.0	 16
425	  3	757.8	117.0	 16
426	  3	71.3	8.9	 16
427	  3	91.0	12.6	 16
428	  3	90.5	14.7	 16
429	  3	403.5	67.6	 16
430	  3	127.3	21.7	 16
431	  3	107.8	16.3	 16
432	  3	135.8	25.1	 16
433	  3	1016.5	188.4	 16
434	  3	131.0	15.4	 16
435	  3	158.3	60.6	 16
436	  3	86.8	14.0	 16
437	  3	84.8	14.0	 16
438	  3	98.0	10.7	 16
439	  3	128.5	24.5	 16
440	  3	108.3	14.7	 16
441	  3	179.5	30.0	 16
442	  3	412.3	56.9	 16
443	  3	379.8	39.2	 16
444	  3	108.3	15.6	 16
445	  3	90.0	10.2	 16
446	  3	87.3	11.3	 16
447	  3	79.3	11.5	 16
448	  3	182.3	24.9	 16
449	  3	112.5	14.9	 16
450	  3	230.0	31.9	 16
451	  3	86.0	11.6	 16
452	  3	286.0	54.9	 16
453	  3	797.0	100.8	 16
454	  3	919.8	89.2	 16
455	  3	364.5	40.3	 16
456	  3	423.8	31.4	 16
457	  3	140.8	20.5	 16
458	  3	96.0	18.7	 16
459	  3	146.3	17.0	 16
460	  3	303.8	41.6	 16
461	  3	581.3	66.2	 16
462	  3	102.3	16.1	 16
463	  3	82.0	11.9	 16
464	  3	779.3	79.0	 16
465	  3	1969.0	165.5	 16
466	  3	1896.8	123.6	 16
467	  3	1621.8	133.6	 16
468	  3	152.3	19.1	 16
469	  3	121.8	29.1	 16
470	  3	407.3	72.7	 16
471	  3	80.0	14.2	 16
472	  3	53.8	12.7	 16
473	  3	56.8	14.6	 16
474	  3	61.3	12.7	 16
475	  3	65.0	10.8	 16
476	  3	60.5	10.2	 16
477	  3	202.0	33.1	 16
478	  3	124.0	17.6	 16
479	  3	132.8	24.2	 16
480	  3	94.8	16.5	 16
481	  3	81.5	14.3	 16
482	  3	123.5	18.4	 16
483	  3	207.5	32.7	 16
484	  3	141.5	19.6	 16
485	  3	222.3	31.3	 16
486	  3	143.3	20.1	 16
487	  3	95.3	15.8	 16
488	  3	154.3	18.6	 16
489	  3	74.8	12.1	 16
490	  3	87.3	13.6	 16
491	  3	113.0	16.7	 16
492	  3	133.3	26.8	 16
493	  3	116.3	11.9	 16
494	  3	128.5	22.7	 16
495	  3	607.8	48.2	 16
496	  3	359.5	40.1	 16
497	  3	323.8	38.7	 16
498	  3	121.5	18.0	 16
499	  3	108.5	19.3	 16
500	  3	174.0	20.5	 16
501	  3	173.8	20.1	 16
502	  3	364.3	51.7	 16
503	  3	93.3	14.2	 16
504	  3	80.0	10.2	 16
505	  3	2541.3	492.3	 16
506	  3	214.3	22.2	 16
507	  3	201.5	26.0	 16
508	  3	127.0	21.9	 16
509	  3	148.8	23.9	 16
510	  3	243.3	25.0	 16
511	  3	135.8	15.4	 16
512	  3	444.5	63.9	 20
513	  3	80.8	9.4	 16
514	  3	93.3	12.8	 16
515	  3	82.8	10.7	 16
516	  3	271.3	51.1	 16
517	  3	185.3	33.9	 16
518	  3	149.0	21.3	 16
519	  3	181.5	25.4	 16
520	  3	109.3	14.2	 16
521	  3	124.0	11.9	 16
522	  3	287.0	32.3	 16
523	  3	260.8	36.4	 16
524	  3	223.8	27.7	 16
525	  3	99.3	14.8	 16
526	  3	101.5	20.0	 16
527	  3	110.0	16.2	 16
528	  3	107.3	13.7	 16
529	  3	109.5	18.8	 16
530	  3	100.3	16.8	 16
531	  3	82.3	11.9	 16
532	  3	132.0	21.2	 16
533	  3	106.3	14.8	 16
534	  3	268.5	29.4	 16
535	  3	270.3	18.1	 16
536	  3	186.0	25.0	 16
537	  3	171.8	15.2	 16
538	  3	117.5	33.5	 16
539	  3	323.8	29.6	 16
540	  3	80.5	12.5	 16
541	  3	134.0	22.8	 16
542	  3	188.8	24.2	 16
543	  3	239.8	23.0	 16
544	  3	329.3	33.2	 16
545	  3	247.5	32.0	 16
546	  3	143.3	13.7	 16
547	  3	173.3	13.0	 16
548	  3	449.8	37.1	 16
549	  3	134.3	18.6	 16
550	  3	126.0	21.7	 16
551	  3	133.3	16.6	 16
552	  3	453.5	80.3	 16
553	  3	104.3	25.0	 16
554	  3	1695.3	360.4	 16
555	  3	82.3	10.3	 16
556	  3	118.0	16.9	 16
557	  3	116.5	19.1	 16
558	  3	385.3	42.1	 16
559	  3	184.3	18.0	 16
560	  3	1126.5	137.5	 16
561	  3	590.8	52.4	 16
562	  3	362.0	29.3	 16
563	  3	203.8	28.1	 16
564	  3	356.3	43.6	 16
565	  3	212.0	20.7	 16
566	  3	526.3	54.1	 16
567	  3	86.8	16.1	 16
568	  3	130.0	15.7	 16
569	  3	159.8	23.1	 16
570	  3	91.8	13.6	 16
571	  3	93.3	18.1	 16
572	  3	301.0	54.7	 16
573	  3	103.0	17.0	 16
574	  3	116.0	12.6	 16
575	  3	198.0	21.2	 16
576	  3	189.8	30.3	 16
577	  3	210.8	29.1	 16
578	  3	109.8	20.9	 16
579	  3	132.0	19.3	 16
580	  3	132.8	22.9	 16
581	  3	164.8	20.1	 16
582	  3	103.3	13.2	 16
583	  3	197.3	23.4	 16
584	  3	251.8	31.7	 16
585	  3	137.8	18.8	 16
586	  3	170.5	28.8	 16
587	  3	142.8	17.5	 16
588	  3	143.8	25.2	 16
589	  3	177.0	24.2	 16
590	  3	249.5	39.4	 16
591	  3	140.8	19.7	 16
592	  3	235.5	27.0	 16
593	  3	230.0	44.2	 16
594	  3	102.8	13.9	 16
595	  3	162.3	20.1	 16
596	  3	161.3	21.3	 16
597	  3	135.5	17.7	 16
598	  3	120.3	15.5	 16
599	  3	190.8	25.6	 16
600	  3	420.5	50.0	 16
601	  3	226.5	26.3	 16
602	  3	359.0	46.6	 16
603	  3	472.3	29.9	 16
604	  3	165.5	17.5	 16
605	  3	546.0	78.9	 16
606	  3	128.3	19.6	 16
607	  3	145.5	26.2	 16
608	  3	202.8	33.6	 16
609	  3	185.3	34.1	 16
610	  3	311.5	38.7	 16
611	  3	215.5	28.7	 16
612	  3	140.3	18.9	 16
613	  3	87.3	10.4	 16
614	  3	176.8	26.4	 16
615	  3	76.0	11.3	 16
616	  3	148.8	18.2	 16
617	  3	155.5	19.9	 16
618	  3	111.8	18.0	 16
619	  3	94.3	12.6	 16
620	  3	1147.0	258.6	 16
621	  3	105.3	24.2	 16
622	  3	87.0	11.8	 16
623	  3	99.5	15.6	 16
624	  3	167.8	164.5	 16
625	  3	150.3	20.3	 16
626	  3	112.8	14.1	 16
627	  3	944.5	255.1	 16
628	  3	451.3	65.9	 16
629	  3	265.3	35.9	 16
630	  3	191.5	22.5	 16
631	  3	440.0	58.0	 16
632	  3	113.3	19.4	 16
633	  3	174.0	17.4	 16
634	  3	176.0	22.6	 16
635	  3	167.5	23.9	 16
636	  3	153.5	25.5	 16
637	  3	507.0	98.8	 16
638	  3	123.5	16.1	 16
639	  3	271.3	45.2	 16
640	  3	313.3	59.2	 16
641	  3	128.5	16.6	 16
642	  3	93.8	18.2	 16
643	  3	101.5	14.7	 16
644	  3	167.3	24.6	 16
645	  3	254.0	38.5	 16
646	  3	1881.0	498.5	 16
647	  3	76.3	12.1	 16
648	  3	135.5	24.8	 16
649	  3	97.5	12.9	 16
650	  3	88.5	16.6	 16
651	  3	98.5	13.1	 16
652	  3	106.0	18.1	 16
653	  3	106.0	26.1	 16
654	  3	86.5	15.0	 20
655	  3	128.8	22.9	 16
656	  3	118.3	14.2	 16
657	  3	94.3	14.7	 16
658	  3	80.0	12.7	 16
659	  3	101.0	15.8	 16
660	  3	133.0	14.4	 16
661	  3	288.8	31.1	 16
662	  3	260.3	36.0	 16
663	  3	329.8	35.9	 16
664	  3	122.8	22.2	 16
665	  3	150.3	18.9	 16
666	  3	481.3	76.3	 16
667	  3	108.5	14.8	 16
668	  3	136.8	17.1	 16
669	  3	124.3	19.2	 16
670	  3	94.3	15.3	 16
671	  3	336.8	53.1	 16
672	  3	164.3	29.2	 16
673	  3	578.0	92.3	 16
674	  3	159.3	20.7	 16
675	  3	172.8	25.8	 16
676	  3	233.8	29.4	 16
677	  3	201.5	24.2	 16
678	  3	81.5	14.6	 16
679	  3	108.5	12.9	 16
680	  3	135.3	15.5	 16
681	  3	98.0	23.6	 16
682	  3	135.0	14.6	 16
683	  3	97.3	18.8	 16
684	  3	75.8	9.5	 16
685	  3	143.3	19.4	 16
686	  3	224.8	34.1	 16
687	  3	117.0	18.1	 16
688	  3	103.3	10.2	 16
689	  3	135.8	29.0	 16
690	  3	770.3	152.5	 16
691	  3	162.5	17.2	 16
692	  3	281.0	20.5	 16
693	  3	153.0	18.6	 16
694	  3	210.5	31.4	 16
695	  3	251.5	33.2	 16
696	  3	285.5	36.1	 16
697	  3	88.3	12.6	 16
698	  3	95.8	14.5	 16
699	  3	144.3	27.4	 16
700	  3	627.5	57.2	 16
701	  3	220.8	24.4	 16
702	  3	138.8	20.8	 16
703	  3	266.5	31.7	 16
704	  3	365.8	43.2	 16
705	  3	322.0	31.1	 16
706	  3	129.0	13.1	 16
707	  3	70.3	12.3	 16
708	  3	7294.8	505.7	 16
709	  3	153.8	26.9	 16
710	  3	7496.0	577.6	 16
711	  3	142.8	20.6	 16
  0	  4	96.0	13.3	 16
  1	  4	85.0	16.9	 16
  2	  4	101.3	20.4	 16
  3	  4	94.5	14.0	 16
  4	  4	85.0	16.2	 16
  5	  4	205.5	19.7	 16
  6	  4	105.8	14.7	 16
  7	  4	247.3	28.5	 16
  8	  4	105.3	12.6	 16
  9	  4	145.5	20.0	 16
 10	  4	125.3	18.7	 16
 11	  4	212.0	20.7	 16
 12	  4	152.5	17.6	 16
 13	  4	216.8	25.9	 16
 14	  4	175.3	45.8	 16
 15	  4	192.3	24.5	 16
 16	  4	195.0	25.2	 16
 17	  4	1300.8	106.4	 16
 18	  4	526.5	44.1	 16
 19	  4	717.3	65.2	 16
 20	  4	153.0	14.8	 16
 21	  4	132.5	14.7	 16
 22	  4	274.0	45.4	 16
 23	  4	305.0	32.1	 16
 24	  4	141.5	19.6	 16
 25	  4	229.8	21.7	 16
 26	  4	190.3	28.5	 16
 27	  4	216.5	26.4	 16
 28	  4	189.0	14.3	 16
 29	  4	193.5	24.5	 16
 30	  4	194.8	23.5	 16
 31	  4	240.3	28.9	 16
 32	  4	175.8	27.0	 16
 33	  4	205.8	21.8	 16
 34	  4	167.8	25.9	 16
 35	  4	253.8	28.9	 16
 36	  4	198.8	27.0	 16
 37	  4	222.3	23.8	 16
 38	  4	215.5	13.2	 16
 39	  4	155.3	16.1	 16
 40	  4	187.8	31.0	 16
 41	  4	187.3	14.1	 16
 42	  4	177.3	21.9	 16
 43	  4	182.3	15.2	 16
 44	  4	171.5	13.7	 16
 45	  4	139.3	14.6	 16
 46	  4	237.0	25.6	 16
 47	  4	220.0	25.3	 16
 48	  4	113.0	22.7	 16
 49	  4	134.5	14.1	 16
 50	  4	346.5	49.0	 16
 51	  4	241.5	24.3	 16
 52	  4	156.8	19.5	 16
 53	  4	153.3	23.8	 16
 54	  4	179.8	19.0	 16
 55	  4	260.5	25.4	 16
 56	  4	281.8	35.9	 16
 57	  4	257.3	32.8	 16
 58	  4	183.8	22.0	 16
 59	  4	210.3	34.7	 16
 60	  4	132.5	24.2	 16
 61	  4	260.3	36.6	 16
 62	  4	138.3	16.8	 16
 63	  4	269.5	32.4	 16
 64	  4	737.3	116.5	 16
 65	  4	157.8	21.9	 16
 66	  4	158.0	26.1	 16
 67	  4	280.5	21.1	 16
 68	  4	162.3	22.2	 16
 69	  4	179.3	27.7	 16
 70	  4	252.8	40.5	 16
 71	  4	164.0	19.2	 16
 72	  4	185.3	25.8	 16
 73	  4	343.5	35.7	 16
 74	  4	261.3	18.2	 16
 75	  4	146.5	21.6	 16
 76	  4	114.3	13.4	 16
 77	  4	152.3	17.9	 16
 78	  4	235.0	26.1	 16
 79	  4	156.3	22.6	 16
 80	  4	135.0	17.5	 16
 81	  4	145.0	13.6	 16
 82	  4	128.5	16.8	 16
 83	  4	260.3	24.3	 16
 84	  4	260.3	27.4	 16
 85	  4	148.3	22.4	 16
 86	  4	153.3	19.3	 16
 87	  4	300.3	43.6	 16
 88	  4	509.0	55.6	 16
 89	  4	341.0	37.2	 20
 90	  4	238.8	27.5	 16
 91	  4	289.0	27.3	 16
 92	  4	275.5	35.4	 16
 93	  4	272.5	34.4	 16
 94	  4	291.0	33.7	 16
 95	  4	300.0	27.0	 16
 96	  4	197.5	25.2	 16
 97	  4	407.0	37.6	 16
 98	  4	158.3	21.2	 16
 99	  4	122.8	18.1	 16
100	  4	195.5	24.8	 16
101	  4	478.3	53.2	 16
102	  4	108.0	13.5	 16
103	  4	165.3	11.5	 16
104	  4	238.0	27.7	 16
105	  4	148.8	18.3	 16
106	  4	121.3	17.4	 16
107	  4	222.8	22.2	 16
108	  4	127.3	14.5	 16
109	  4	209.3	21.5	 16
110	  4	145.3	21.8	 16
111	  4	140.3	18.7	 16
112	  4	223.8	17.9	 16
113	  4	206.0	26.8	 16
114	  4	190.0	17.9	 16
115	  4	182.0	27.9	 16
116	  4	172.0	29.6	 16
117	  4	182.0	31.0	 16
118	  4	162.3	20.2	 16
119	  4	266.0	25.9	 16
120	  4	204.5	26.5	 16
121	  4	189.0	16.4	 16
122	  4	184.3	24.3	 16
123	  4	128.0	19.0	 16
124	  4	136.5	17.9	 16
125	  4	134.0	18.0	 16
126	  4	177.5	26.9	 16
127	  4	138.0	19.1	 16
128	  4	104.3	14.1	 16
129	  4	108.5	16.6	 16
130	  4	167.8	20.3	 16
131	  4	531.5	57.0	 16
132	  4	283.5	30.4	 16
133	  4	134.5	15.8	 16
134	  4	284.5	31.8	 16
135	  4	215.5	32.5	 16
136	  4	316.5	41.7	 16
137	  4	136.8	24.4	 16
138	  4	192.5	18.0	 16
139	  4	287.3	35.8	 16
140	  4	117.0	18.5	 16
141	  4	114.0	12.0	 16
142	  4	373.3	26.0	 16
143	  4	480.5	49.3	 16
144	  4	98.3	11.5	 16
145	  4	138.3	20.9	 16
146	  4	1069.0	86.9	 16
147	  4	201.0	25.9	 16
148	  4	175.5	15.5	 16
149	  4	132.8	13.8	 16
150	  4	123.8	18.6	 16
151	  4	194.5	23.6	 16
152	  4	147.0	19.0	 16
153	  4	154.3	19.6	 16
154	  4	104.5	17.4	 16
155	  4	118.0	14.9	 16
156	  4	116.8	14.8	 16
157	  4	115.5	18.4	 16
158	  4	114.0	12.7	 16
159	  4	110.5	16.7	 16
160	  4	309.8	26.7	 16
161	  4	353.8	35.7	 16
162	  4	319.0	40.2	 16
163	  4	120.5	20.2	 16
164	  4	174.8	17.3	 16
165	  4	242.0	24.3	 16
166	  4	121.3	14.9	 16
167	  4	195.5	27.3	 16
168	  4	127.3	15.8	 16
169	  4	99.0	12.7	 16
170	  4	153.5	17.4	 16
171	  4	96.0	14.8	 16
172	  4	122.0	22.9	 16
173	  4	95.5	16.5	 16
174	  4	110.5	14.3	 16
175	  4	97.3	16.2	 16
176	  4	141.5	31.0	 16
177	  4	101.5	14.7	 16
178	  4	105.0	20.5	 16
179	  4	282.8	34.5	 16
180	  4	344.8	27.3	 16
181	  4	125.0	18.6	 16
182	  4	135.5	15.3	 16
183	  4	162.3	27.2	 16
184	  4	115.8	17.2	 16
185	  4	138.8	22.1	 16
186	  4	105.0	11.1	 16
187	  4	95.0	11.0	 16
188	  4	89.5	10.2	 16
189	  4	118.5	21.2	 16
190	  4	110.3	13.9	 16
191	  4	190.0	22.5	 16
192	  4	140.5	25.4	 16
193	  4	127.5	15.1	 16
194	  4	121.8	14.7	 16
195	  4	168.5	22.7	 16
196	  4	206.0	24.0	 16
197	  4	247.8	20.8	 16
198	  4	230.3	34.4	 16
199	  4	215.3	20.2	 16
200	  4	138.3	10.0	 16
201	  4	113.3	22.6	 16
202	  4	134.3	20.6	 16
203	  4	108.0	12.2	 16
204	  4	105.3	11.3	 16
205	  4	141.5	24.7	 16
206	  4	132.0	21.0	 16
207	  4	123.8	16.1	 16
208	  4	113.0	17.2	 16
209	  4	152.3	26.7	 16
210	  4	128.3	17.2	 16
211	  4	94.5	17.2	 16
212	  4	95.3	16.6	 16
213	  4	131.8	20.1	 16
214	  4	92.0	13.0	 16
215	  4	162.5	20.6	 16
216	  4	115.3	15.8	 16
217	  4	253.5	36.2	 16
218	  4	225.0	31.4	 16
219	  4	141.3	21.8	 16
220	  4	139.5	20.2	 16
221	  4	127.8	16.8	 16
222	  4	108.8	15.8	 16
223	  4	127.0	23.1	 16
224	  4	103.8	29.6	 16
225	  4	129.8	15.6	 16
226	  4	161.3	24.7	 16
227	  4	135.8	17.8	 16
228	  4	147.3	18.0	 16
229	  4	103.0	11.9	 16
230	  4	80.8	7.9	 16
231	  4	116.5	14.2	 20
232	  4	95.0	13.5	 16
233	  4	96.5	15.1	 16
234	  4	92.5	15.6	 16
235	  4	72.3	9.8	 16
236	  4	68.5	13.4	 16
237	  4	65.5	10.4	 16
238	  4	72.0	12.7	 16
239	  4	79.5	13.9	 16
240	  4	189.8	25.2	 16
241	  4	140.3	16.6	 16
242	  4	122.3	16.1	 16
243	  4	361.3	38.3	 16
244	  4	158.8	20.4	 16
245	  4	181.3	22.8	 16
246	  4	262.5	29.4	 16
247	  4	176.5	21.6	 16
248	  4	95.5	13.1	 16
249	  4	93.5	14.8	 16
250	  4	110.3	22.0	 16
251	  4	166.5	16.7	 16
252	  4	149.5	22.7	 16
253	  4	116.3	18.6	 16
254	  4	110.5	21.3	 16
255	  4	137.5	19.4	 16
256	  4	97.8	13.8	 16
257	  4	103.8	17.5	 16
258	  4	137.0	17.1	 16
259	  4	99.0	18.8	 16
260	  4	82.3	12.6	 16
261	  4	85.8	11.9	 16
262	  4	97.5	15.5	 16
263	  4	128.8	19.1	 16
264	  4	280.3	36.8	 16
265	  4	89.8	13.7	 16
266	  4	166.3	17.8	 16
267	  4	119.3	13.9	 16
268	  4	84.0	10.1	 16
269	  4	116.8	17.2	 16
270	  4	141.0	19.6	 16
271	  4	125.8	21.4	 16
272	  4	232.5	24.5	 16
273	  4	825.5	86.4	 16
274	  4	394.0	49.8	 16
275	  4	272.8	29.7	 16
276	  4	164.3	15.0	 16
277	  4	170.3	16.8	 16
278	  4	161.5	16.9	 16
279	  4	120.3	16.3	 16
280	  4	141.3	18.8	 16
281	  4	86.0	12.1	 16
282	  4	90.5	11.7	 16
283	  4	158.3	25.9	 16
284	  4	103.8	19.9	 16
285	  4	196.0	18.2	 16
286	  4	173.8	15.8	 16
287	  4	167.3	20.4	 16
288	  4	137.8	21.9	 16
289	  4	146.0	21.7	 16
290	  4	177.3	22.2	 16
291	  4	134.0	20.0	 16
292	  4	142.0	14.3	 16
293	  4	213.5	31.6	 16
294	  4	182.3	31.5	 16
295	  4	147.0	20.1	 16
296	  4	121.0	170.0	 16
297	  4	140.5	18.6	 16
298	  4	181.0	24.4	 16
299	  4	160.8	26.0	 16
300	  4	137.5	16.5	 16
301	  4	180.3	21.3	 16
302	  4	116.3	17.3	 16
303	  4	142.3	19.3	 16
304	  4	175.0	30.1	 16
305	  4	100.3	16.0	 16
306	  4	101.8	17.0	 16
307	  4	131.8	18.4	 16
308	  4	119.0	15.7	 16
309	  4	455.5	64.8	 16
310	  4	447.8	36.7	 16
311	  4	162.0	20.6	 16
312	  4	241.0	30.1	 16
313	  4	340.3	36.4	 16
314	  4	198.8	26.1	 16
315	  4	104.0	14.8	 16
316	  4	192.0	29.2	 16
317	  4	102.0	14.3	 16
318	  4	87.5	13.8	 16
319	  4	95.5	9.9	 16
320	  4	144.0	21.8	 16
321	  4	202.3	32.9	 16
322	  4	108.0	14.5	 16
323	  4	118.5	21.9	 16
324	  4	169.0	22.7	 16
325	  4	200.0	18.6	 16
326	  4	130.5	20.3	 16
327	  4	124.8	13.6	 16
328	  4	236.8	18.0	 16
329	  4	329.5	21.4	 16
330	  4	108.8	17.5	 16
331	  4	94.3	17.8	 16
332	  4	87.3	13.8	 16
333	  4	86.0	16.8	 16
334	  4	81.8	14.2	 16
335	  4	91.0	16.0	 16
336	  4	81.3	12.2	 16
337	  4	110.0	13.9	 16
338	  4	114.3	15.5	 16
339	  4	87.8	10.1	 16
340	  4	134.3	19.4	 16
341	  4	388.5	46.1	 16
342	  4	157.8	25.7	 16
343	  4	185.0	18.7	 16
344	  4	175.8	16.2	 16
345	  4	194.8	18.5	 16
346	  4	146.5	20.0	 16
347	  4	133.5	19.5	 16
348	  4	340.3	37.8	 16
349	  4	300.3	37.6	 16
350	  4	133.3	22.0	 16
351	  4	115.5	16.0	 16
352	  4	134.8	21.3	 16
353	  4	99.0	21.9	 16
354	  4	128.5	15.7	 16
355	  4	162.3	18.0	 16
356	  4	112.3	18.4	 16
357	  4	233.8	32.5	 16
358	  4	79.8	13.7	 16
359	  4	96.8	15.4	 16
360	  4	120.3	14.7	 16
361	  4	256.3	35.5	 16
362	  4	244.3	44.8	 16
363	  4	226.0	29.4	 16
364	  4	182.0	25.9	 16
365	  4	347.0	32.1	 16
366	  4	95.3	14.8	 16
367	  4	102.5	13.8	 16
368	  4	81.0	11.1	 16
369	  4	130.8	25.0	 16
370	  4	143.0	18.2	 16
371	  4	167.0	27.0	 16
372	  4	185.8	29.2	 16
373	  4	210.3	27.4	 16
374	  4	109.5	15.6	 20
375	  4	126.3	18.7	 16
376	  4	169.0	20.7	 16
377	  4	119.0	16.6	 16
378	  4	180.3	37.9	 16
379	  4	141.3	17.3	 16
380	  4	256.3	32.1	 16
381	  4	1092.0	76.4	 16
382	  4	585.3	75.9	 16
383	  4	444.5	40.3	 16
384	  4	123.8	18.7	 16
385	  4	104.5	17.1	 16
386	  4	91.3	13.2	 16
387	  4	283.5	29.3	 16
388	  4	91.5	16.4	 16
389	  4	127.5	24.0	 16
390	  4	86.3	15.0	 16
391	  4	80.3	11.5	 16
392	  4	103.8	11.1	 16
393	  4	106.0	12.4	 16
394	  4	141.3	21.0	 16
395	  4	213.8	21.0	 16
396	  4	196.5	25.1	 16
397	  4	125.8	20.8	 16
398	  4	107.8	14.5	 16
399	  4	111.0	13.1	 16
400	  4	159.3	21.9	 16
401	  4	156.3	28.2	 16
402	  4	109.8	20.6	 16
403	  4	81.0	14.2	 16
404	  4	87.0	9.7	 16
405	  4	187.3	18.4	 16
406	  4	148.3	18.5	 16
407	  4	177.8	20.1	 16
408	  4	117.5	14.4	 16
409	  4	215.3	24.1	 16
410	  4	190.8	26.0	 16
411	  4	308.3	23.4	 16
412	  4	304.0	38.2	 16
413	  4	539.0	50.9	 16
414	  4	102.5	12.9	 16
415	  4	117.8	17.2	 16
416	  4	92.8	10.3	 16
417	  4	98.3	16.4	 16
418	  4	116.0	11.3	 16
419	  4	254.0	23.5	 16
420	  4	135.3	20.3	 16
421	  4	150.5	19.9	 16
422	  4	143.3	17.6	 16
423	  4	234.0	33.2	 16
424	  4	129.8	21.0	 16
425	  4	195.3	77.7	 16
426	  4	74.8	10.9	 16
427	  4	83.8	15.2	 16
428	  4	74.0	13.0	 16
429	  4	166.3	16.0	 16
430	  4	207.0	23.2	 16
431	  4	127.3	10.6	 16
432	  4	93.0	9.6	 16
433	  4	152.5	31.3	 16
434	  4	128.0	17.5	 16
435	  4	83.0	14.7	 16
436	  4	85.8	16.6	 16
437	  4	73.0	9.4	 16
438	  4	100.3	16.5	 16
439	  4	110.5	14.3	 16
440	  4	122.3	18.5	 16
441	  4	112.3	21.5	 16
442	  4	90.0	12.7	 16
443	  4	333.5	33.2	 16
444	  4	102.0	12.7	 16
445	  4	79.5	15.1	 16
446	  4	83.0	19.9	 16
447	  4	76.0	14.0	 16
448	  4	106.5	17.7	 16
449	  4	117.3	11.6	 16
450	  4	125.8	18.5	 16
451	  4	89.3	19.2	 16
452	  4	99.5	13.6	 16
453	  4	643.8	49.8	 16
454	  4	817.3	57.8	 16
455	  4	254.0	29.7	 16
456	  4	247.0	24.7	 16
457	  4	123.0	18.3	 16
458	  4	80.0	12.9	 16
459	  4	118.0	17.4	 16
460	  4	363.8	21.4	 16
461	  4	921.8	52.4	 16
462	  4	91.3	13.0	 16
463	  4	70.3	11.6	 16
464	  4	330.8	44.4	 16
465	  4	349.5	27.4	 16
466	  4	303.8	38.2	 16
467	  4	253.8	36.9	 16
468	  4	156.3	18.6	 16
469	  4	85.8	16.9	 16
470	  4	299.5	38.8	 16
471	  4	76.5	10.3	 16
472	  4	60.5	14.0	 16
473	  4	59.5	12.0	 16
474	  4	68.3	12.5	 16
475	  4	64.0	10.0	 16
476	  4	59.5	10.4	 16
477	  4	136.8	17.3	 16
478	  4	91.0	13.6	 16
479	  4	138.5	16.5	 16
480	  4	78.3	15.2	 16
481	  4	80.0	12.9	 16
482	  4	94.0	12.0	 16
483	  4	131.5	21.9	 16
484	  4	93.5	12.3	 16
485	  4	196.5	23.2	 16
486	  4	124.8	19.4	 16
487	  4	84.5	14.8	 16
488	  4	158.3	21.7	 16
489	  4	78.0	13.6	 16
490	  4	79.5	24.9	 16
491	  4	81.0	10.5	 16
492	  4	114.3	11.8	 16
493	  4	130.0	17.7	 16
494	  4	123.5	17.4	 16
495	  4	358.3	47.3	 16
496	  4	123.3	27.4	 16
497	  4	489.0	34.3	 16
498	  4	126.5	16.9	 16
499	  4	125.8	21.4	 16
500	  4	133.0	24.3	 16
501	  4	198.3	24.4	 16
502	  4	188.8	23.7	 16
503	  4	79.3	9.7	 16
504	  4	84.5	15.1	 16
505	  4	813.3	121.9	 16
506	  4	124.3	24.0	 16
507	  4	135.8	25.2	 16
508	  4	126.0	17.2	 16
509	  4	144.5	17.8	 16
510	  4	279.5	30.4	 16
511	  4	189.0	30.8	 16
512	  4	214.5	33.5	 16
513	  4	87.0	19.8	 16
514	  4	94.0	12.6	 16
515	  4	88.0	11.1	 16
516	  4	118.8	21.3	 20
517	  4	110.8	16.3	 16
518	  4	119.5	15.1	 16
519	  4	111.3	13.3	 16
520	  4	73.3	11.2	 16
521	  4	107.3	16.8	 16
522	  4	225.0	35.5	 16
523	  4	176.8	26.1	 16
524	  4	116.0	16.1	 16
525	  4	91.3	10.6	 16
526	  4	101.3	16.8	 16
527	  4	88.0	12.5	 16
528	  4	114.8	14.9	 16
529	  4	76.3	13.4	 16
530	  4	77.0	12.2	 16
531	  4	68.3	10.5	 16
532	  4	135.3	20.5	 16
533	  4	91.0	9.7	 16
534	  4	117.3	19.5	 16
535	  4	240.0	31.6	 16
536	  4	126.5	14.8	 16
537	  4	165.3	22.9	 16
538	  4	105.5	22.2	 16
539	  4	126.8	17.9	 16
540	  4	77.3	9.6	 16
541	  4	93.3	17.9	 16
542	  4	108.8	16.0	 16
543	  4	319.3	36.3	 16
544	  4	237.0	25.2	 16
545	  4	100.8	13.7	 16
546	  4	101.0	15.3	 16
547	  4	155.8	25.6	 16
548	  4	344.3	47.0	 16
549	  4	113.3	14.8	 16
550	  4	122.8	17.7	 16
551	  4	83.0	9.4	 16
552	  4	100.0	14.1	 16
553	  4	87.8	12.9	 16
554	  4	239.3	79.8	 16
555	  4	83.5	14.4	 16
556	  4	112.0	18.0	 16
557	  4	85.0	11.6	 16
558	  4	84.8	16.2	 16
559	  4	259.5	38.2	 16
560	  4	414.3	64.0	 16
561	  4	721.0	51.4	 16
562	  4	391.5	34.5	 16
563	  4	146.8	29.2	 16
564	  4	208.3	18.1	 16
565	  4	263.5	40.2	 16
566	  4	366.3	36.1	 16
567	  4	109.5	77.3	 16
568	  4	118.8	35.5	 16
569	  4	101.0	17.3	 16
570	  4	78.8	14.8	 16
571	  4	87.8	11.4	 16
572	  4	125.3	21.3	 16
573	  4	97.8	16.8	 16
574	  4	105.5	15.0	 16
575	  4	170.3	28.4	 16
576	  4	157.8	26.5	 16
577	  4	169.3	25.4	 16
578	  4	132.8	18.3	 16
579	  4	145.0	17.3	 16
580	  4	158.8	18.7	 16
581	  4	176.0	22.0	 16
582	  4	164.8	21.2	 16
583	  4	158.5	20.3	 16
584	  4	217.5	26.1	 16
585	  4	201.5	28.1	 16
586	  4	107.0	23.8	 16
587	  4	119.3	23.8	 16
588	  4	181.0	27.1	 16
589	  4	167.0	29.0	 16
590	  4	131.5	12.2	 16
591	  4	131.3	19.1	 16
592	  4	178.3	21.8	 16
593	  4	107.0	15.5	 16
594	  4	115.5	18.0	 16
595	  4	119.0	13.6	 16
596	  4	105.5	13.0	 16
597	  4	116.0	16.9	 16
598	  4	98.3	16.1	 16
599	  4	114.0	16.2	 16
600	  4	345.0	50.1	 16
601	  4	167.3	19.7	 16
602	  4	308.3	31.9	 16
603	  4	455.3	36.3	 16
604	  4	146.8	26.0	 16
605	  4	203.8	39.5	 16
606	  4	119.8	17.8	 16
607	  4	88.5	8.9	 16
608	  4	153.0	18.8	 16
609	  4	145.0	25.0	 16
610	  4	148.8	22.6	 16
611	  4	119.5	16.5	 16
612	  4	97.3	16.3	 16
613	  4	86.0	16.8	 16
614	  4	108.3	18.4	 16
615	  4	92.8	23.6	 16
616	  4	115.0	11.8	 16
617	  4	116.0	15.8	 16
618	  4	88.3	10.6	 16
619	  4	87.0	12.6	 16
620	  4	202.8	33.2	 16
621	  4	89.0	12.6	 16
622	  4	85.3	16.7	 16
623	  4	96.5	13.7	 16
624	  4	88.8	13.4	 16
625	  4	203.3	20.3	 16
626	  4	96.3	9.4	 16
627	  4	178.0	35.6	 16
628	  4	248.3	26.4	 16
629	  4	369.0	34.3	 16
630	  4	189.5	23.9	 16
631	  4	138.8	16.0	 16
632	  4	114.3	13.7	 16
633	  4	170.5	27.8	 16
634	  4	140.0	14.7	 16
635	  4	123.0	17.5	 16
636	  4	136.0	16.8	 16
637	  4	183.8	29.8	 16
638	  4	141.3	26.8	 16
639	  4	123.3	20.3	 16
640	  4	134.0	17.9	 16
641	  4	118.3	19.4	 16
642	  4	103.3	13.5	 16
643	  4	125.0	21.8	 16
644	  4	158.0	25.6	 16
645	  4	145.3	19.4	 16
646	  4	167.3	33.8	 16
647	  4	74.3	12.1	 16
648	  4	122.0	22.6	 16
649	  4	84.5	10.0	 16
650	  4	72.5	8.4	 16
651	  4	115.0	23.9	 16
652	  4	86.3	19.7	 16
653	  4	110.3	19.8	 16
654	  4	87.0	14.1	 16
655	  4	102.8	18.4	 16
656	  4	109.0	17.2	 16
657	  4	79.3	11.6	 16
658	  4	83.3	10.6	 20
659	  4	78.3	12.7	 16
660	  4	110.8	15.6	 16
661	  4	186.8	26.8	 16
662	  4	159.0	23.2	 16
663	  4	283.5	30.6	 16
664	  4	111.0	20.3	 16
665	  4	102.5	19.7	 16
666	  4	268.3	22.8	 16
667	  4	76.5	10.5	 16
668	  4	103.3	18.1	 16
669	  4	97.0	16.0	 16
670	  4	96.0	14.9	 16
671	  4	122.3	21.5	 16
672	  4	152.8	19.2	 16
673	  4	310.0	43.4	 16
674	  4	292.5	33.6	 16
675	  4	244.8	24.0	 16
676	  4	101.5	15.9	 16
677	  4	146.3	15.1	 16
678	  4	73.3	13.2	 16
679	  4	105.3	15.2	 16
680	  4	192.8	17.3	 16
681	  4	89.0	13.1	 16
682	  4	100.3	38.2	 16
683	  4	83.3	13.6	 16
684	  4	78.5	14.2	 16
685	  4	117.3	15.6	 16
686	  4	142.5	20.8	 16
687	  4	96.8	16.6	 16
688	  4	90.5	10.4	 16
689	  4	92.0	14.1	 16
690	  4	399.8	46.3	 16
691	  4	141.0	21.6	 16
692	  4	341.3	28.9	 16
693	  4	136.3	23.9	 16
694	  4	168.5	28.4	 16
695	  4	235.5	27.2	 16
696	  4	210.0	26.8	 16
697	  4	69.5	10.1	 16
698	  4	84.0	13.9	 16
699	  4	101.8	19.5	 16
700	  4	123.8	20.9	 16
701	  4	109.5	14.1	 16
702	  4	131.3	17.7	 16
703	  4	250.5	27.1	 16
704	  4	353.3	47.4	 16
705	  4	256.5	28.6	 16
706	  4	131.3	16.4	 16
707	  4	65.5	11.4	 16
708	  4	67.0	9.4	 16
709	  4	62.0	14.3	 16
710	  4	61.3	11.1	 16
711	  4	54.5	8.0	 16
  0	  5	154.3	20.2	 16
  1	  5	102.8	12.6	 16
  2	  5	102.3	12.6	 16
  3	  5	129.3	17.1	 16
  4	  5	90.5	13.0	 16
  5	  5	171.3	28.9	 16
  6	  5	535.8	55.4	 16
  7	  5	160.5	17.2	 16
  8	  5	93.8	13.6	 16
  9	  5	228.0	31.3	 16
 10	  5	248.3	26.1	 16
 11	  5	115.3	17.5	 16
 12	  5	173.5	18.8	 16
 13	  5	7187.3	852.3	 16
 14	  5	7358.8	719.2	 16
 15	  5	7032.5	588.3	 16
 16	  5	176.8	19.2	 16
 17	  5	105.5	12.9	 16
 18	  5	166.3	21.5	 16
 19	  5	177.8	23.8	 16
 20	  5	148.8	13.2	 16
 21	  5	192.3	24.8	 16
 22	  5	175.3	23.2	 16
 23	  5	124.8	18.1	 16
 24	  5	276.5	34.8	 16
 25	  5	301.8	60.4	 16
 26	  5	187.0	23.3	 16
 27	  5	177.3	19.7	 16
 28	  5	174.8	21.8	 16
 29	  5	108.3	14.7	 16
 30	  5	173.0	21.2	 16
 31	  5	176.0	23.1	 16
 32	  5	170.0	26.5	 16
 33	  5	174.5	21.5	 16
 34	  5	192.0	22.2	 16
 35	  5	126.8	36.6	 16
 36	  5	184.0	26.8	 16
 37	  5	6727.8	778.2	 16
 38	  5	7332.0	800.6	 16
 39	  5	7414.8	802.8	 16
 40	  5	194.0	23.7	 16
 41	  5	125.0	23.5	 16
 42	  5	6454.0	647.5	 16
 43	  5	185.0	20.5	 16
 44	  5	162.3	26.9	 16
 45	  5	174.3	19.6	 16
 46	  5	152.5	17.2	 16
 47	  5	104.5	15.2	 16
 48	  5	163.3	19.1	 16
 49	  5	176.3	27.5	 16
 50	  5	177.8	24.4	 16
 51	  5	180.3	16.1	 16
 52	  5	162.8	19.4	 16
 53	  5	112.8	18.2	 16
 54	  5	158.3	28.7	 16
 55	  5	183.3	21.0	 16
 56	  5	164.3	21.3	 16
 57	  5	166.5	21.2	 16
 58	  5	192.5	27.0	 16
 59	  5	102.3	14.8	 16
 60	  5	96.5	10.3	 16
 61	  5	109.8	15.8	 16
 62	  5	6106.8	451.5	 16
 63	  5	200.5	26.9	 16
 64	  5	182.3	19.2	 16
 65	  5	191.8	27.1	 16
 66	  5	7054.8	882.9	 16
 67	  5	171.0	22.5	 16
 68	  5	261.0	33.4	 16
 69	  5	6115.3	807.5	 16
 70	  5	6326.5	669.3	 16
 71	  5	5834.3	709.3	 16
 72	  5	198.3	20.0	 16
 73	  5	120.3	19.7	 16
 74	  5	166.0	28.5	 16
 75	  5	164.5	15.6	 16
 76	  5	190.0	29.5	 16
 77	  5	164.5	26.5	 16
 78	  5	158.3	23.2	 16
 79	  5	104.5	15.3	 16
 80	  5	5939.8	1193.5	 16
 81	  5	183.5	25.9	 16
 82	  5	149.3	17.9	 16
 83	  5	167.0	21.9	 16
 84	  5	6770.8	1043.4	 16
 85	  5	131.5	28.4	 16
 86	  5	184.8	83.7	 16
 87	  5	176.5	22.6	 16
 88	  5	5781.0	885.4	 16
 89	  5	196.3	19.8	 16
 90	  5	168.0	15.9	 16
 91	  5	122.0	25.3	 16
 92	  5	161.8	16.9	 16
 93	  5	5425.3	981.0	 20
 94	  5	5453.5	790.4	 16
 95	  5	181.0	20.6	 16
 96	  5	166.0	26.3	 16
 97	  5	118.0	15.7	 16
 98	  5	163.5	28.3	 16
 99	  5	6067.0	612.7	 16
100	  5	6091.3	889.0	 16
101	  5	183.5	37.3	 16
102	  5	170.0	22.8	 16
103	  5	108.8	17.7	 16
104	  5	155.0	15.5	 16
105	  5	178.0	21.5	 16
106	  5	5059.0	1012.8	 16
107	  5	181.8	18.3	 16
108	  5	171.0	23.8	 16
109	  5	100.5	20.7	 16
110	  5	97.5	12.2	 16
111	  5	128.3	19.8	 16
112	  5	179.0	25.7	 16
113	  5	133.3	18.7	 16
114	  5	99.3	12.3	 16
115	  5	220.3	21.8	 16
116	  5	168.3	23.6	 16
117	  5	162.0	23.5	 16
118	  5	2795.8	300.3	 16
119	  5	228.5	27.7	 16
120	  5	149.0	19.6	 16
121	  5	150.0	15.7	 16
122	  5	104.8	16.9	 16
123	  5	123.3	20.0	 16
124	  5	123.8	14.0	 16
125	  5	113.5	12.4	 16
126	  5	244.0	43.4	 16
127	  5	123.0	17.8	 16
128	  5	419.3	92.1	 16
129	  5	188.8	19.4	 16
130	  5	137.0	15.4	 16
131	  5	310.0	37.7	 16
132	  5	104.3	15.2	 16
133	  5	229.5	26.1	 16
134	  5	211.0	19.9	 16
135	  5	152.5	21.9	 16
136	  5	99.0	16.8	 16
137	  5	109.3	19.0	 16
138	  5	95.8	16.5	 16
139	  5	302.5	30.3	 16
140	  5	109.8	15.8	 16
141	  5	220.5	32.5	 16
142	  5	127.0	17.5	 16
143	  5	533.3	71.7	 16
144	  5	140.3	17.1	 16
145	  5	124.0	19.6	 16
146	  5	149.0	18.3	 16
147	  5	441.8	42.2	 16
148	  5	118.0	14.9	 16
149	  5	131.8	20.2	 16
150	  5	157.0	18.7	 16
151	  5	167.5	28.6	 16
152	  5	218.5	23.1	 16
153	  5	176.8	24.3	 16
154	  5	253.0	29.3	 16
155	  5	133.3	13.0	 16
156	  5	171.3	26.6	 16
157	  5	248.8	34.0	 16
158	  5	186.8	27.2	 16
159	  5	277.3	21.8	 16
160	  5	174.0	20.2	 16
161	  5	223.5	49.3	 16
162	  5	230.0	29.3	 16
163	  5	150.3	18.2	 16
164	  5	156.3	17.7	 16
165	  5	411.0	44.2	 16
166	  5	320.5	38.2	 16
167	  5	164.0	26.0	 16
168	  5	122.8	17.3	 16
169	  5	329.5	42.0	 16
170	  5	126.5	14.8	 16
171	  5	151.0	21.9	 16
172	  5	237.0	36.8	 16
173	  5	116.3	17.7	 16
174	  5	292.5	51.6	 16
175	  5	132.3	19.7	 16
176	  5	104.3	15.6	 16
177	  5	99.5	17.6	 16
178	  5	100.5	15.6	 16
179	  5	122.5	20.2	 16
180	  5	363.8	56.6	 16
181	  5	515.5	51.0	 16
182	  5	191.8	20.9	 16
183	  5	139.8	18.9	 16
184	  5	100.0	17.4	 16
185	  5	265.3	26.8	 16
186	  5	238.3	23.1	 16
187	  5	119.0	24.7	 16
188	  5	187.5	20.5	 16
189	  5	133.5	20.7	 16
190	  5	136.0	19.9	 16
191	  5	110.5	14.8	 16
192	  5	184.3	26.1	 16
193	  5	275.5	42.0	 16
194	  5	197.3	24.0	 16
195	  5	231.8	30.2	 16
196	  5	196.3	17.2	 16
197	  5	228.8	33.0	 16
198	  5	205.3	26.4	 16
199	  5	131.3	19.1	 16
200	  5	186.3	23.7	 16
201	  5	133.8	18.8	 16
202	  5	133.8	19.5	 16
203	  5	132.0	21.6	 16
204	  5	100.5	24.7	 16
205	  5	91.3	14.1	 16
206	  5	265.5	34.0	 16
207	  5	104.8	17.7	 16
208	  5	122.8	13.7	 16
209	  5	228.0	34.8	 16
210	  5	205.0	25.4	 16
211	  5	114.5	10.6	 16
212	  5	118.5	13.8	 16
213	  5	201.0	23.5	 16
214	  5	267.8	32.4	 16
215	  5	134.8	31.5	 16
216	  5	177.3	27.9	 16
217	  5	541.8	95.9	 16
218	  5	100.5	13.5	 16
219	  5	87.3	23.4	 16
220	  5	93.8	11.6	 16
221	  5	210.5	35.6	 16
222	  5	113.3	19.9	 16
223	  5	117.3	13.9	 16
224	  5	151.0	30.4	 16
225	  5	105.3	17.1	 16
226	  5	141.8	23.6	 16
227	  5	165.3	21.4	 16
228	  5	171.5	23.3	 16
229	  5	468.8	34.4	 16
230	  5	130.5	37.0	 16
231	  5	160.8	20.3	 16
232	  5	91.3	13.4	 16
233	  5	123.3	22.0	 16
234	  5	113.3	16.3	 16
235	  5	226.5	27.3	 20
236	  5	115.8	14.0	 16
237	  5	100.0	9.7	 16
238	  5	183.5	21.6	 16
239	  5	292.5	44.4	 16
240	  5	116.8	15.9	 16
241	  5	99.0	18.1	 16
242	  5	111.5	14.5	 16
243	  5	204.8	21.4	 16
244	  5	163.0	16.9	 16
245	  5	372.3	37.2	 16
246	  5	213.8	36.5	 16
247	  5	116.3	18.9	 16
248	  5	152.5	23.9	 16
249	  5	153.0	18.2	 16
250	  5	113.8	15.9	 16
251	  5	1027.5	86.9	 16
252	  5	91.5	21.6	 16
253	  5	105.3	15.4	 16
254	  5	84.3	19.4	 16
255	  5	343.8	45.3	 16
256	  5	677.0	63.0	 16
257	  5	119.0	17.4	 16
258	  5	119.5	19.1	 16
259	  5	98.0	17.7	 16
260	  5	97.8	16.3	 16
261	  5	96.8	16.6	 16
262	  5	235.5	19.9	 16
263	  5	97.0	13.8	 16
264	  5	99.5	16.6	 16
265	  5	101.0	15.8	 16
266	  5	88.5	11.6	 16
267	  5	128.3	20.1	 16
268	  5	103.0	11.7	 16
269	  5	127.0	22.2	 16
270	  5	109.0	15.1	 16
271	  5	525.0	102.9	 16
272	  5	279.5	65.4	 16
273	  5	144.8	23.5	 16
274	  5	106.3	13.5	 16
275	  5	100.5	17.2	 16
276	  5	96.0	11.6	 16
277	  5	102.8	20.1	 16
278	  5	178.3	27.0	 16
279	  5	122.0	24.7	 16
280	  5	150.5	25.4	 16
281	  5	787.8	58.7	 16
282	  5	740.8	58.7	 16
283	  5	260.5	34.8	 16
284	  5	129.5	13.1	 16
285	  5	269.8	34.0	 16
286	  5	102.3	17.0	 16
287	  5	117.0	18.8	 16
288	  5	216.5	21.0	 16
289	  5	181.0	25.5	 16
290	  5	1642.0	250.8	 16
291	  5	174.3	15.5	 16
292	  5	158.0	23.5	 16
293	  5	178.0	23.5	 16
294	  5	520.5	60.4	 16
295	  5	246.3	39.4	 16
296	  5	145.3	22.5	 16
297	  5	120.0	10.7	 16
298	  5	116.8	12.1	 16
299	  5	106.0	19.0	 16
300	  5	1249.0	154.3	 16
301	  5	171.3	27.3	 16
302	  5	299.3	28.4	 16
303	  5	421.0	54.2	 16
304	  5	109.0	15.4	 16
305	  5	102.8	14.9	 16
306	  5	461.0	64.6	 16
307	  5	136.5	18.6	 16
308	  5	317.3	29.5	 16
309	  5	228.5	56.0	 16
310	  5	140.0	24.1	 16
311	  5	287.0	30.0	 16
312	  5	155.0	24.8	 16
313	  5	165.8	19.3	 16
314	  5	167.0	25.4	 16
315	  5	149.0	21.9	 16
316	  5	125.5	21.1	 16
317	  5	142.3	27.4	 16
318	  5	173.0	24.3	 16
319	  5	95.3	18.1	 16
320	  5	74.3	13.8	 16
321	  5	107.8	20.0	 16
322	  5	87.8	14.5	 16
323	  5	136.8	363.1	 16
324	  5	291.3	27.9	 16
325	  5	159.3	15.7	 16
326	  5	263.0	28.1	 16
327	  5	240.8	28.8	 16
328	  5	94.8	13.4	 16
329	  5	392.8	48.5	 16
330	  5	477.5	44.6	 16
331	  5	151.0	19.0	 16
332	  5	122.0	17.9	 16
333	  5	314.0	41.9	 16
334	  5	151.3	28.1	 16
335	  5	98.0	9.1	 16
336	  5	108.3	15.3	 16
337	  5	144.3	20.8	 16
338	  5	142.3	22.6	 16
339	  5	120.3	22.0	 16
340	  5	212.5	18.8	 16
341	  5	373.5	43.1	 16
342	  5	105.3	15.0	 16
343	  5	95.5	13.8	 16
344	  5	165.0	24.2	 16
345	  5	134.5	16.9	 16
346	  5	129.5	15.7	 16
347	  5	1455.0	167.4	 16
348	  5	114.5	14.2	 16
349	  5	187.0	29.1	 16
350	  5	273.3	22.3	 16
351	  5	411.0	27.5	 16
352	  5	432.0	56.3	 16
353	  5	134.5	12.5	 16
354	  5	136.5	19.2	 16
355	  5	2087.8	371.0	 16
356	  5	108.5	19.2	 16
357	  5	191.8	32.1	 16
358	  5	131.0	24.1	 16
359	  5	147.8	16.7	 16
360	  5	166.0	25.8	 16
361	  5	263.5	35.4	 16
362	  5	370.8	77.4	 16
363	  5	106.0	14.3	 16
364	  5	77.3	10.8	 16
365	  5	90.3	9.9	 16
366	  5	90.0	20.7	 16
367	  5	658.3	156.9	 16
368	  5	185.3	22.9	 16
369	  5	191.0	31.0	 16
370	  5	108.3	13.4	 16
371	  5	243.5	31.3	 16
372	  5	293.8	39.1	 16
373	  5	130.0	18.7	 16
374	  5	100.5	17.1	 16
375	  5	96.5	11.8	 16
376	  5	91.8	12.5	 16
377	  5	103.3	11.0	 20
378	  5	173.5	24.0	 16
379	  5	175.0	29.7	 16
380	  5	189.0	28.6	 16
381	  5	125.0	18.2	 16
382	  5	187.5	22.2	 16
383	  5	704.5	60.8	 16
384	  5	92.5	12.0	 16
385	  5	148.8	27.7	 16
386	  5	178.3	27.8	 16
387	  5	267.5	37.0	 16
388	  5	227.5	38.2	 16
389	  5	443.0	82.4	 16
390	  5	128.3	21.4	 16
391	  5	105.3	17.0	 16
392	  5	344.3	37.3	 16
393	  5	106.0	19.7	 16
394	  5	133.3	20.0	 16
395	  5	101.8	20.7	 16
396	  5	95.5	16.3	 16
397	  5	143.3	20.9	 16
398	  5	279.0	37.4	 16
399	  5	178.0	21.4	 16
400	  5	291.5	35.5	 16
401	  5	120.3	12.7	 16
402	  5	124.0	15.5	 16
403	  5	75.3	11.9	 16
404	  5	199.0	31.0	 16
405	  5	102.3	14.0	 16
406	  5	145.8	16.7	 16
407	  5	127.3	20.3	 16
408	  5	193.8	26.2	 16
409	  5	108.0	14.3	 16
410	  5	202.0	21.5	 16
411	  5	169.8	20.2	 16
412	  5	95.5	15.0	 16
413	  5	133.5	16.9	 16
414	  5	147.3	27.3	 16
415	  5	4375.3	305.5	 16
416	  5	4113.0	218.6	 16
417	  5	311.3	20.0	 16
418	  5	154.5	22.5	 16
419	  5	259.0	22.5	 16
420	  5	104.5	17.5	 16
421	  5	144.5	28.2	 16
422	  5	93.5	13.1	 16
423	  5	127.0	19.1	 16
424	  5	121.8	13.5	 16
425	  5	154.5	21.9	 16
426	  5	104.3	12.9	 16
427	  5	74.8	14.7	 16
428	  5	99.0	18.4	 16
429	  5	171.3	23.7	 16
430	  5	109.3	15.1	 16
431	  5	123.3	17.2	 16
432	  5	179.3	28.3	 16
433	  5	190.8	31.7	 16
434	  5	150.0	20.7	 16
435	  5	100.3	16.7	 16
436	  5	104.0	19.2	 16
437	  5	112.8	16.7	 16
438	  5	108.8	18.1	 16
439	  5	216.5	27.5	 16
440	  5	165.5	21.2	 16
441	  5	148.0	23.9	 16
442	  5	255.5	34.8	 16
443	  5	160.3	16.0	 16
444	  5	179.8	20.3	 16
445	  5	147.3	14.6	 16
446	  5	144.5	18.2	 16
447	  5	102.3	16.4	 16
448	  5	212.8	25.2	 16
449	  5	969.5	115.9	 16
450	  5	490.8	40.9	 16
451	  5	469.8	75.3	 16
452	  5	227.0	36.7	 16
453	  5	218.5	29.4	 16
454	  5	414.5	69.6	 16
455	  5	206.5	42.2	 16
456	  5	75.0	10.2	 16
457	  5	153.3	28.6	 16
458	  5	228.0	27.7	 16
459	  5	132.3	23.6	 16
460	  5	104.0	20.0	 16
461	  5	199.8	29.2	 16
462	  5	110.8	15.6	 16
463	  5	287.8	30.7	 16
464	  5	1192.5	116.4	 16
465	  5	366.3	40.2	 16
466	  5	147.3	22.6	 16
467	  5	102.0	9.3	 16
468	  5	129.0	18.3	 16
469	  5	181.8	20.7	 16
470	  5	192.8	106.1	 16
471	  5	117.5	25.6	 16
472	  5	222.0	30.9	 16
473	  5	179.3	29.8	 16
474	  5	103.0	19.8	 16
475	  5	100.3	22.4	 16
476	  5	157.5	19.9	 16
477	  5	127.5	11.2	 16
478	  5	151.5	16.6	 16
479	  5	145.3	23.0	 16
480	  5	125.0	17.0	 16
481	  5	118.8	20.3	 16
482	  5	170.0	24.4	 16
483	  5	98.8	20.6	 16
484	  5	126.8	15.8	 16
485	  5	300.5	39.5	 16
486	  5	106.5	10.0	 16
487	  5	182.0	14.3	 16
488	  5	118.3	20.1	 16
489	  5	113.3	17.2	 16
490	  5	123.8	20.9	 16
491	  5	281.5	26.8	 16
492	  5	88.0	12.0	 16
493	  5	156.0	23.7	 16
494	  5	110.5	15.3	 16
495	  5	242.5	20.7	 16
496	  5	332.3	44.7	 16
497	  5	127.8	14.7	 16
498	  5	210.3	27.4	 16
499	  5	102.3	18.4	 16
500	  5	124.3	11.8	 16
501	  5	128.5	19.2	 16
502	  5	81.5	10.3	 16
503	  5	330.5	55.1	 16
504	  5	125.3	18.4	 16
505	  5	210.8	21.9	 16
506	  5	88.0	14.3	 16
507	  5	83.0	12.5	 16
508	  5	203.5	39.8	 16
509	  5	2091.0	497.9	 16
510	  5	112.0	15.3	 16
511	  5	355.0	37.4	 16
512	  5	99.8	17.7	 16
513	  5	111.3	19.6	 16
514	  5	79.5	11.1	 16
515	  5	122.0	17.4	 16
516	  5	108.0	15.8	 16
517	  5	327.8	42.3	 16
518	  5	204.3	18.1	 16
519	  5	124.0	17.4	 16
520	  5	116.3	13.6	 20
521	  5	264.8	34.9	 16
522	  5	246.8	28.3	 16
523	  5	204.5	30.7	 16
524	  5	513.8	71.9	 16
525	  5	91.8	18.1	 16
526	  5	177.3	24.1	 16
527	  5	616.0	116.9	 16
528	  5	101.8	15.1	 16
529	  5	559.0	100.9	 16
530	  5	207.5	43.5	 16
531	  5	178.5	22.7	 16
532	  5	107.8	13.6	 16
533	  5	229.3	32.1	 16
534	  5	184.8	23.3	 16
535	  5	236.3	27.2	 16
536	  5	891.3	55.2	 16
537	  5	130.5	9.5	 16
538	  5	3268.0	288.7	 16
539	  5	641.3	86.7	 16
540	  5	92.5	15.9	 16
541	  5	215.0	24.2	 16
542	  5	267.0	48.7	 16
543	  5	96.3	14.2	 16
544	  5	191.5	32.4	 16
545	  5	357.0	31.8	 16
546	  5	368.8	32.0	 16
547	  5	327.8	47.1	 16
548	  5	184.0	24.1	 16
549	  5	159.3	20.4	 16
550	  5	128.0	13.0	 16
551	  5	228.0	33.0	 16
552	  5	89.0	12.8	 16
553	  5	136.3	32.4	 16
554	  5	78.8	13.4	 16
555	  5	119.3	18.9	 16
556	  5	94.3	10.6	 16
557	  5	164.3	31.3	 16
558	  5	115.5	19.7	 16
559	  5	109.8	12.0	 16
560	  5	241.3	38.9	 16
561	  5	251.3	75.1	 16
562	  5	5313.8	653.1	 16
563	  5	114.0	15.5	 16
564	  5	110.0	14.1	 16
565	  5	170.3	29.3	 16
566	  5	487.8	53.6	 16
567	  5	473.8	76.9	 16
568	  5	171.3	20.8	 16
569	  5	329.5	48.7	 16
570	  5	801.8	128.2	 16
571	  5	156.0	20.1	 16
572	  5	194.5	39.5	 16
573	  5	97.3	17.4	 16
574	  5	135.5	13.4	 16
575	  5	165.5	24.2	 16
576	  5	184.5	25.3	 16
577	  5	114.3	20.5	 16
578	  5	166.0	23.3	 16
579	  5	692.8	144.9	 16
580	  5	160.8	18.5	 16
581	  5	374.3	35.2	 16
582	  5	382.5	32.5	 16
583	  5	288.3	27.1	 16
584	  5	152.3	20.9	 16
585	  5	150.5	17.1	 16
586	  5	163.5	26.6	 16
587	  5	158.3	21.2	 16
588	  5	107.5	13.4	 16
589	  5	91.0	16.8	 16
590	  5	82.0	11.6	 16
591	  5	117.5	15.3	 16
592	  5	435.0	49.0	 16
593	  5	357.0	41.7	 16
594	  5	128.3	10.1	 16
595	  5	107.5	17.5	 16
596	  5	138.0	25.5	 16
597	  5	204.0	34.2	 16
598	  5	326.5	48.2	 16
599	  5	75.3	14.9	 16
600	  5	118.3	17.6	 16
601	  5	160.8	20.1	 16
602	  5	487.5	62.1	 16
603	  5	103.5	14.9	 16
604	  5	99.0	17.3	 16
605	  5	82.8	12.0	 16
606	  5	82.5	13.4	 16
607	  5	77.0	8.9	 16
608	  5	81.0	16.6	 16
609	  5	175.0	27.9	 16
610	  5	72.5	17.5	 16
611	  5	77.8	11.1	 16
612	  5	141.0	21.7	 16
613	  5	107.5	19.4	 16
614	  5	145.3	17.9	 16
615	  5	113.3	14.1	 16
616	  5	276.8	30.7	 16
617	  5	283.8	28.2	 16
618	  5	159.5	28.6	 16
619	  5	82.3	14.5	 16
620	  5	70.8	8.7	 16
621	  5	77.3	14.5	 16
622	  5	95.0	12.4	 16
623	  5	170.0	22.3	 16
624	  5	177.0	21.7	 16
625	  5	118.3	25.9	 16
626	  5	464.3	50.8	 16
627	  5	109.8	18.1	 16
628	  5	167.5	20.2	 16
629	  5	364.0	29.4	 16
630	  5	217.3	31.2	 16
631	  5	142.5	17.5	 16
632	  5	242.0	15.1	 16
633	  5	157.5	16.7	 16
634	  5	208.5	39.2	 16
635	  5	145.5	25.5	 16
636	  5	128.3	19.7	 16
637	  5	492.8	69.4	 16
638	  5	277.8	33.3	 16
639	  5	98.5	14.9	 16
640	  5	171.0	31.1	 16
641	  5	93.5	12.7	 16
642	  5	79.0	12.4	 16
643	  5	161.0	28.0	 16
644	  5	228.5	27.4	 16
645	  5	192.0	26.2	 16
646	  5	104.5	16.6	 16
647	  5	79.5	15.3	 16
648	  5	440.3	76.7	 16
649	  5	87.0	15.2	 16
650	  5	100.3	15.9	 16
651	  5	286.3	40.9	 16
652	  5	141.0	14.8	 16
653	  5	83.3	18.2	 16
654	  5	122.0	21.1	 16
655	  5	202.0	27.4	 16
656	  5	157.5	27.9	 16
657	  5	1096.0	251.4	 16
658	  5	93.5	14.8	 16
659	  5	259.3	41.4	 16
660	  5	167.8	26.7	 16
661	  5	360.3	86.9	 16
662	  5	119.8	16.7	 20
663	  5	171.8	21.1	 16
664	  5	1401.5	162.8	 16
665	  5	150.8	12.2	 16
666	  5	265.0	34.2	 16
667	  5	134.8	16.3	 16
668	  5	296.0	36.8	 16
669	  5	249.5	37.2	 16
670	  5	95.8	11.7	 16
671	  5	105.3	14.8	 16
672	  5	136.5	14.5	 16
673	  5	102.3	17.3	 16
674	  5	158.0	20.0	 16
675	  5	127.3	19.9	 16
676	  5	118.5	18.5	 16
677	  5	74.0	14.3	 16
678	  5	116.0	25.7	 16
679	  5	1982.3	238.7	 16
680	  5	88.0	15.8	 16
681	  5	297.0	34.7	 16
682	  5	126.3	19.2	 16
683	  5	172.3	20.4	 16
684	  5	99.3	11.8	 16
685	  5	88.0	13.9	 16
686	  5	109.0	13.1	 16
687	  5	93.0	15.7	 16
688	  5	3621.3	521.5	 16
689	  5	268.8	38.9	 16
690	  5	151.3	17.2	 16
691	  5	332.8	47.1	 16
692	  5	136.3	17.2	 16
693	  5	188.8	27.5	 16
694	  5	248.5	36.2	 16
695	  5	216.0	28.2	 16
696	  5	121.0	19.1	 16
697	  5	107.3	20.0	 16
698	  5	90.3	20.1	 16
699	  5	254.3	52.7	 16
700	  5	89.3	10.0	 16
701	  5	131.0	18.7	 16
702	  5	158.0	20.0	 16
703	  5	255.0	35.2	 16
704	  5	100.5	15.7	 16
705	  5	182.3	27.3	 16
706	  5	193.3	25.6	 16
707	  5	146.0	21.8	 16
708	  5	115.8	19.1	 16
709	  5	104.0	16.1	 16
710	  5	129.8	21.6	 16
711	  5	131.8	17.9	 16
  0	  6	5864.8	624.0	 16
  1	  6	119.0	18.3	 16
  2	  6	97.3	11.6	 16
  3	  6	122.0	12.7	 16
  4	  6	98.3	13.6	 16
  5	  6	137.0	23.7	 16
  6	  6	251.8	24.3	 16
  7	  6	142.0	13.6	 16
  8	  6	120.0	16.5	 16
  9	  6	323.3	33.6	 16
 10	  6	264.0	30.2	 16
 11	  6	95.8	16.6	 16
 12	  6	7360.3	503.1	 16
 13	  6	185.8	24.6	 16
 14	  6	171.3	18.6	 16
 15	  6	185.8	19.5	 16
 16	  6	6692.0	627.7	 16
 17	  6	111.3	14.3	 16
 18	  6	181.0	21.5	 16
 19	  6	166.0	11.6	 16
 20	  6	182.5	24.4	 16
 21	  6	181.5	27.5	 16
 22	  6	203.0	23.4	 16
 23	  6	179.5	23.0	 16
 24	  6	331.8	33.3	 16
 25	  6	343.5	29.1	 16
 26	  6	241.5	28.3	 16
 27	  6	169.3	24.8	 16
 28	  6	187.0	21.1	 16
 29	  6	115.0	16.8	 16
 30	  6	182.0	23.6	 16
 31	  6	186.3	32.1	 16
 32	  6	168.3	21.9	 16
 33	  6	192.0	21.9	 16
 34	  6	187.5	23.3	 16
 35	  6	118.5	24.4	 16
 36	  6	7028.0	491.8	 16
 37	  6	197.0	22.5	 16
 38	  6	177.0	18.4	 16
 39	  6	178.5	14.5	 16
 40	  6	7342.0	712.6	 16
 41	  6	117.0	15.2	 16
 42	  6	6993.3	472.5	 16
 43	  6	165.0	17.8	 16
 44	  6	192.3	17.7	 16
 45	  6	175.3	19.3	 16
 46	  6	172.5	24.2	 16
 47	  6	105.0	14.9	 16
 48	  6	181.3	22.3	 16
 49	  6	180.8	19.8	 16
 50	  6	193.8	21.7	 16
 51	  6	173.5	18.8	 16
 52	  6	166.3	17.4	 16
 53	  6	110.0	14.4	 16
 54	  6	171.0	17.9	 16
 55	  6	173.5	19.2	 16
 56	  6	167.0	23.6	 16
 57	  6	162.5	15.5	 16
 58	  6	169.8	17.2	 16
 59	  6	99.5	14.3	 16
 60	  6	85.0	12.6	 16
 61	  6	103.5	16.8	 16
 62	  6	6555.3	405.2	 16
 63	  6	200.5	28.2	 16
 64	  6	186.5	22.9	 16
 65	  6	209.8	29.2	 16
 66	  6	8343.8	779.3	 16
 67	  6	432.3	79.1	 16
 68	  6	7346.3	639.9	 16
 69	  6	459.3	73.1	 16
 70	  6	241.0	44.7	 16
 71	  6	200.3	29.0	 16
 72	  6	6164.5	800.7	 16
 73	  6	127.5	23.8	 16
 74	  6	168.0	20.0	 16
 75	  6	149.0	18.2	 16
 76	  6	165.8	18.1	 16
 77	  6	164.5	26.6	 16
 78	  6	170.3	20.2	 16
 79	  6	101.5	12.3	 16
 80	  6	6268.8	651.9	 16
 81	  6	176.5	20.7	 16
 82	  6	184.0	24.1	 16
 83	  6	172.8	22.8	 16
 84	  6	7256.0	1115.8	 16
 85	  6	131.3	26.8	 16
 86	  6	159.3	15.3	 16
 87	  6	5975.8	992.9	 16
 88	  6	6604.8	299.5	 16
 89	  6	215.3	28.7	 16
 90	  6	167.8	23.8	 16
 91	  6	110.8	17.4	 16
 92	  6	5842.0	910.6	 16
 93	  6	196.8	27.2	 16
 94	  6	182.8	29.5	 16
 95	  6	6198.3	1105.0	 16
 96	  6	191.5	16.2	 16
 97	  6	113.0	14.2	 20
 98	  6	6024.5	900.2	 16
 99	  6	180.8	25.7	 16
100	  6	183.8	24.1	 16
101	  6	6053.3	1009.0	 16
102	  6	177.3	22.4	 16
103	  6	103.3	11.5	 16
104	  6	165.3	20.5	 16
105	  6	5969.0	1161.7	 16
106	  6	176.3	18.9	 16
107	  6	6205.0	682.0	 16
108	  6	160.8	16.5	 16
109	  6	96.3	13.9	 16
110	  6	99.8	13.8	 16
111	  6	107.3	18.6	 16
112	  6	123.5	12.9	 16
113	  6	126.0	20.6	 16
114	  6	110.8	17.6	 16
115	  6	253.3	33.4	 16
116	  6	169.5	22.4	 16
117	  6	157.8	23.2	 16
118	  6	375.5	64.7	 16
119	  6	221.0	22.4	 16
120	  6	145.5	21.9	 16
121	  6	162.8	20.0	 16
122	  6	111.5	17.6	 16
123	  6	124.0	20.5	 16
124	  6	128.5	15.1	 16
125	  6	113.0	15.0	 16
126	  6	119.8	18.5	 16
127	  6	108.3	17.0	 16
128	  6	210.0	18.1	 16
129	  6	177.3	26.7	 16
130	  6	190.3	25.9	 16
131	  6	345.0	39.2	 16
132	  6	107.5	16.5	 16
133	  6	197.3	23.1	 16
134	  6	135.8	15.9	 16
135	  6	128.0	21.5	 16
136	  6	103.8	14.6	 16
137	  6	118.8	14.6	 16
138	  6	101.8	12.2	 16
139	  6	166.8	27.2	 16
140	  6	111.3	10.9	 16
141	  6	114.8	19.8	 16
142	  6	112.3	17.2	 16
143	  6	195.0	34.5	 16
144	  6	142.5	19.6	 16
145	  6	112.0	15.5	 16
146	  6	155.3	15.1	 16
147	  6	222.5	30.0	 16
148	  6	117.8	15.1	 16
149	  6	110.3	12.9	 16
150	  6	136.5	22.3	 16
151	  6	172.8	25.3	 16
152	  6	139.0	16.8	 16
153	  6	153.3	22.3	 16
154	  6	117.8	18.8	 16
155	  6	152.3	16.5	 16
156	  6	148.3	21.7	 16
157	  6	208.0	27.2	 16
158	  6	179.5	22.1	 16
159	  6	227.3	29.5	 16
160	  6	167.5	16.9	 16
161	  6	239.5	34.9	 16
162	  6	201.0	24.9	 16
163	  6	202.5	14.6	 16
164	  6	204.5	24.5	 16
165	  6	118.5	13.2	 16
166	  6	290.8	27.8	 16
167	  6	156.3	14.5	 16
168	  6	119.3	13.2	 16
169	  6	145.5	18.5	 16
170	  6	117.5	17.1	 16
171	  6	186.0	19.8	 16
172	  6	125.3	17.9	 16
173	  6	98.0	15.2	 16
174	  6	136.8	15.7	 16
175	  6	121.0	14.9	 16
176	  6	111.3	17.4	 16
177	  6	84.3	9.7	 16
178	  6	95.3	11.7	 16
179	  6	102.5	19.2	 16
180	  6	208.8	23.8	 16
181	  6	153.5	19.3	 16
182	  6	169.5	21.1	 16
183	  6	145.8	19.3	 16
184	  6	98.0	16.1	 16
185	  6	182.0	25.7	 16
186	  6	198.5	23.4	 16
187	  6	129.5	18.4	 16
188	  6	176.0	24.8	 16
189	  6	133.3	13.4	 16
190	  6	144.8	25.5	 16
191	  6	98.0	14.8	 16
192	  6	130.5	15.9	 16
193	  6	133.3	16.2	 16
194	  6	166.0	23.9	 16
195	  6	175.3	23.7	 16
196	  6	191.0	23.3	 16
197	  6	214.5	23.8	 16
198	  6	268.8	31.5	 16
199	  6	231.8	19.0	 16
200	  6	264.5	38.2	 16
201	  6	213.0	30.1	 16
202	  6	190.5	20.8	 16
203	  6	112.5	11.6	 16
204	  6	100.8	14.2	 16
205	  6	81.3	11.4	 16
206	  6	116.5	15.7	 16
207	  6	94.3	11.9	 16
208	  6	110.3	15.7	 16
209	  6	209.8	29.5	 16
210	  6	139.3	18.5	 16
211	  6	126.3	15.8	 16
212	  6	138.8	13.8	 16
213	  6	122.5	15.4	 16
214	  6	180.3	22.4	 16
215	  6	136.3	18.0	 16
216	  6	133.0	20.5	 16
217	  6	203.0	19.3	 16
218	  6	96.5	16.4	 16
219	  6	99.3	11.6	 16
220	  6	94.0	16.1	 16
221	  6	104.3	15.4	 16
222	  6	100.0	15.1	 16
223	  6	151.3	27.3	 16
224	  6	117.3	13.2	 16
225	  6	90.5	10.4	 16
226	  6	107.0	17.7	 16
227	  6	131.0	20.5	 16
228	  6	163.0	20.8	 16
229	  6	371.5	30.5	 16
230	  6	112.3	16.6	 16
231	  6	135.0	19.2	 16
232	  6	86.0	9.5	 16
233	  6	103.3	17.2	 16
234	  6	98.5	14.6	 16
235	  6	144.5	22.3	 16
236	  6	124.8	28.4	 16
237	  6	90.5	17.5	 16
238	  6	153.0	24.1	 16
239	  6	186.3	22.2	 20
240	  6	109.8	19.2	 16
241	  6	83.0	16.7	 16
242	  6	112.0	13.3	 16
243	  6	142.5	24.2	 16
244	  6	159.3	28.2	 16
245	  6	213.3	35.7	 16
246	  6	104.3	20.6	 16
247	  6	91.5	13.5	 16
248	  6	109.0	17.6	 16
249	  6	140.3	23.5	 16
250	  6	116.8	16.1	 16
251	  6	214.3	45.6	 16
252	  6	98.0	16.2	 16
253	  6	88.3	14.6	 16
254	  6	104.3	15.1	 16
255	  6	136.3	21.9	 16
256	  6	269.3	35.8	 16
257	  6	97.3	16.0	 16
258	  6	90.3	10.3	 16
259	  6	102.5	13.9	 16
260	  6	129.0	122.7	 16
261	  6	81.3	10.5	 16
262	  6	138.5	21.1	 16
263	  6	86.5	11.4	 16
264	  6	89.5	13.7	 16
265	  6	94.3	13.1	 16
266	  6	81.8	13.7	 16
267	  6	89.0	17.7	 16
268	  6	89.3	11.5	 16
269	  6	112.3	13.6	 16
270	  6	106.8	16.7	 16
271	  6	178.5	24.5	 16
272	  6	211.3	22.8	 16
273	  6	154.5	18.4	 16
274	  6	100.5	16.1	 16
275	  6	98.0	12.8	 16
276	  6	87.5	10.6	 16
277	  6	114.0	20.3	 16
278	  6	117.5	19.8	 16
279	  6	93.0	11.7	 16
280	  6	124.5	14.5	 16
281	  6	482.0	62.7	 16
282	  6	427.8	41.5	 16
283	  6	245.5	31.7	 16
284	  6	114.8	15.4	 16
285	  6	207.0	30.3	 16
286	  6	113.3	33.8	 16
287	  6	106.8	20.8	 16
288	  6	250.5	30.4	 16
289	  6	212.3	18.6	 16
290	  6	190.3	26.9	 16
291	  6	157.0	27.4	 16
292	  6	144.0	13.2	 16
293	  6	130.5	16.0	 16
294	  6	157.3	24.7	 16
295	  6	109.3	17.6	 16
296	  6	112.0	18.2	 16
297	  6	121.0	14.2	 16
298	  6	92.8	19.8	 16
299	  6	89.0	11.5	 16
300	  6	456.3	65.4	 16
301	  6	103.8	10.7	 16
302	  6	118.0	19.0	 16
303	  6	162.5	15.2	 16
304	  6	141.8	24.3	 16
305	  6	92.0	14.1	 16
306	  6	267.5	31.7	 16
307	  6	147.3	19.6	 16
308	  6	103.5	15.9	 16
309	  6	125.0	18.1	 16
310	  6	93.8	16.5	 16
311	  6	186.0	18.5	 16
312	  6	109.3	20.6	 16
313	  6	102.0	22.6	 16
314	  6	161.5	16.2	 16
315	  6	101.3	17.4	 16
316	  6	115.5	20.9	 16
317	  6	87.3	15.9	 16
318	  6	82.3	16.6	 16
319	  6	89.0	15.3	 16
320	  6	86.5	13.8	 16
321	  6	74.3	10.6	 16
322	  6	84.3	8.5	 16
323	  6	101.0	12.0	 16
324	  6	208.8	30.3	 16
325	  6	223.3	26.9	 16
326	  6	224.0	23.5	 16
327	  6	159.8	19.4	 16
328	  6	197.0	24.0	 16
329	  6	547.5	26.5	 16
330	  6	228.3	26.4	 16
331	  6	153.3	23.3	 16
332	  6	115.5	11.0	 16
333	  6	261.8	24.8	 16
334	  6	111.3	13.5	 16
335	  6	81.5	15.9	 16
336	  6	90.5	16.7	 16
337	  6	158.8	20.0	 16
338	  6	156.5	24.4	 16
339	  6	117.0	15.5	 16
340	  6	197.3	30.2	 16
341	  6	142.3	16.5	 16
342	  6	86.0	14.8	 16
343	  6	81.8	12.3	 16
344	  6	149.8	24.3	 16
345	  6	111.0	17.0	 16
346	  6	107.0	13.7	 16
347	  6	447.0	59.9	 16
348	  6	92.5	13.8	 16
349	  6	134.3	14.2	 16
350	  6	241.3	26.7	 16
351	  6	512.8	45.9	 16
352	  6	532.5	59.8	 16
353	  6	114.3	19.7	 16
354	  6	91.3	11.2	 16
355	  6	446.8	59.1	 16
356	  6	99.3	11.6	 16
357	  6	100.3	15.5	 16
358	  6	117.3	23.9	 16
359	  6	143.5	13.9	 16
360	  6	156.0	26.6	 16
361	  6	239.3	35.1	 16
362	  6	222.8	26.5	 16
363	  6	104.8	12.8	 16
364	  6	69.0	11.5	 16
365	  6	82.8	13.5	 16
366	  6	72.0	12.8	 16
367	  6	166.8	30.4	 16
368	  6	88.3	9.6	 16
369	  6	96.0	19.0	 16
370	  6	114.8	14.1	 16
371	  6	358.0	43.3	 16
372	  6	149.0	20.0	 16
373	  6	127.3	26.0	 16
374	  6	93.8	17.7	 16
375	  6	97.3	13.3	 16
376	  6	92.5	12.7	 16
377	  6	102.5	18.2	 16
378	  6	133.3	22.1	 16
379	  6	175.0	20.7	 16
380	  6	158.3	22.0	 16
381	  6	158.5	20.7	 20
382	  6	163.5	23.0	 16
383	  6	725.8	66.6	 16
384	  6	81.8	9.6	 16
385	  6	128.0	12.9	 16
386	  6	118.0	17.4	 16
387	  6	146.3	17.0	 16
388	  6	180.0	21.2	 16
389	  6	233.3	25.5	 16
390	  6	132.3	17.7	 16
391	  6	110.3	17.0	 16
392	  6	161.0	27.1	 16
393	  6	97.3	13.6	 16
394	  6	105.0	15.4	 16
395	  6	82.8	13.8	 16
396	  6	122.8	17.8	 16
397	  6	124.5	17.2	 16
398	  6	141.5	21.9	 16
399	  6	89.3	14.2	 16
400	  6	148.0	21.7	 16
401	  6	130.3	15.2	 16
402	  6	90.3	18.0	 16
403	  6	74.5	11.9	 16
404	  6	98.8	18.8	 16
405	  6	110.3	17.5	 16
406	  6	124.3	15.1	 16
407	  6	183.8	26.4	 16
408	  6	148.3	23.1	 16
409	  6	94.3	14.6	 16
410	  6	225.3	26.4	 16
411	  6	212.3	26.8	 16
412	  6	102.3	15.3	 16
413	  6	103.8	13.1	 16
414	  6	120.5	18.8	 16
415	  6	548.5	100.5	 16
416	  6	534.3	111.4	 16
417	  6	103.0	14.9	 16
418	  6	165.0	23.9	 16
419	  6	157.8	26.4	 16
420	  6	100.5	20.0	 16
421	  6	116.3	20.6	 16
422	  6	86.8	16.9	 16
423	  6	93.8	16.1	 16
424	  6	98.0	10.4	 16
425	  6	152.8	15.4	 16
426	  6	99.0	12.5	 16
427	  6	71.8	13.5	 16
428	  6	116.3	20.2	 16
429	  6	188.5	18.0	 16
430	  6	82.5	11.6	 16
431	  6	103.0	12.5	 16
432	  6	270.0	32.6	 16
433	  6	122.3	15.6	 16
434	  6	88.0	9.5	 16
435	  6	113.8	24.2	 16
436	  6	90.3	14.5	 16
437	  6	122.5	17.5	 16
438	  6	104.0	15.9	 16
439	  6	206.0	23.0	 16
440	  6	189.5	27.4	 16
441	  6	175.5	28.0	 16
442	  6	307.0	34.6	 16
443	  6	154.0	18.4	 16
444	  6	162.3	19.0	 16
445	  6	128.5	18.4	 16
446	  6	126.8	18.9	 16
447	  6	88.8	16.5	 16
448	  6	648.5	78.0	 16
449	  6	210.8	24.2	 16
450	  6	236.5	34.6	 16
451	  6	123.0	17.3	 16
452	  6	166.3	23.1	 16
453	  6	120.3	17.3	 16
454	  6	265.8	32.1	 16
455	  6	85.3	11.0	 16
456	  6	86.8	14.4	 16
457	  6	122.3	15.8	 16
458	  6	176.5	25.0	 16
459	  6	141.3	15.3	 16
460	  6	92.3	13.9	 16
461	  6	131.3	20.4	 16
462	  6	107.0	15.4	 16
463	  6	119.0	14.1	 16
464	  6	702.8	54.7	 16
465	  6	365.0	50.2	 16
466	  6	143.3	26.2	 16
467	  6	108.0	19.2	 16
468	  6	110.0	12.1	 16
469	  6	191.8	22.2	 16
470	  6	134.0	12.5	 16
471	  6	128.3	17.1	 16
472	  6	180.0	22.6	 16
473	  6	144.5	24.1	 16
474	  6	95.5	13.0	 16
475	  6	112.5	19.7	 16
476	  6	83.5	11.0	 16
477	  6	124.3	24.6	 16
478	  6	104.0	21.6	 16
479	  6	94.0	11.2	 16
480	  6	91.3	10.0	 16
481	  6	87.3	13.6	 16
482	  6	127.3	24.3	 16
483	  6	91.3	11.6	 16
484	  6	134.5	19.4	 16
485	  6	212.8	19.7	 16
486	  6	143.3	16.3	 16
487	  6	180.3	24.4	 16
488	  6	100.3	17.3	 16
489	  6	102.5	15.7	 16
490	  6	133.3	22.4	 16
491	  6	136.8	16.3	 16
492	  6	107.5	16.4	 16
493	  6	91.3	13.3	 16
494	  6	97.5	13.5	 16
495	  6	219.8	32.5	 16
496	  6	346.8	30.8	 16
497	  6	123.3	13.8	 16
498	  6	138.3	20.5	 16
499	  6	111.8	11.0	 16
500	  6	148.8	20.4	 16
501	  6	195.3	34.5	 16
502	  6	85.5	13.0	 16
503	  6	231.5	25.0	 16
504	  6	109.0	16.4	 16
505	  6	153.5	16.9	 16
506	  6	96.3	13.6	 16
507	  6	99.3	14.6	 16
508	  6	236.3	22.9	 16
509	  6	935.5	105.5	 16
510	  6	119.5	17.7	 16
511	  6	127.5	12.1	 16
512	  6	102.3	16.3	 16
513	  6	88.3	9.1	 16
514	  6	80.5	16.1	 16
515	  6	79.8	8.0	 16
516	  6	73.3	9.6	 16
517	  6	200.3	18.9	 16
518	  6	103.5	20.0	 16
519	  6	103.3	11.1	 16
520	  6	109.0	18.3	 16
521	  6	187.8	15.7	 16
522	  6	96.3	14.2	 16
523	  6	255.8	30.6	 16
524	  6	373.3	31.3	 20
525	  6	91.3	12.5	 16
526	  6	571.8	66.7	 16
527	  6	94.0	12.9	 16
528	  6	85.5	12.1	 16
529	  6	111.5	17.6	 16
530	  6	115.8	17.2	 16
531	  6	177.3	26.4	 16
532	  6	157.3	18.9	 16
533	  6	196.3	30.5	 16
534	  6	124.5	14.9	 16
535	  6	236.0	24.2	 16
536	  6	701.0	60.8	 16
537	  6	165.5	23.5	 16
538	  6	1239.8	160.2	 16
539	  6	210.0	32.9	 16
540	  6	83.3	11.5	 16
541	  6	177.0	24.9	 16
542	  6	134.0	14.5	 16
543	  6	79.8	15.9	 16
544	  6	161.8	22.9	 16
545	  6	329.8	34.5	 16
546	  6	343.0	33.4	 16
547	  6	301.0	35.4	 16
548	  6	224.5	27.3	 16
549	  6	219.5	28.3	 16
550	  6	153.5	20.7	 16
551	  6	155.5	14.4	 16
552	  6	86.5	16.2	 16
553	  6	85.3	16.4	 16
554	  6	75.3	16.1	 16
555	  6	84.3	12.9	 16
556	  6	90.0	15.8	 16
557	  6	74.8	12.4	 16
558	  6	119.0	21.9	 16
559	  6	97.3	9.6	 16
560	  6	242.0	24.1	 16
561	  6	110.5	18.5	 16
562	  6	1197.3	174.8	 16
563	  6	115.0	15.3	 16
564	  6	120.3	16.5	 16
565	  6	124.3	14.6	 16
566	  6	240.3	20.3	 16
567	  6	127.5	18.9	 16
568	  6	95.5	11.9	 16
569	  6	187.0	19.2	 16
570	  6	423.8	38.2	 16
571	  6	160.3	21.3	 16
572	  6	132.3	22.3	 16
573	  6	112.0	17.3	 16
574	  6	116.3	18.7	 16
575	  6	89.3	13.4	 16
576	  6	110.8	16.9	 16
577	  6	85.3	10.4	 16
578	  6	94.3	16.0	 16
579	  6	254.5	42.4	 16
580	  6	173.3	22.3	 16
581	  6	388.0	39.9	 16
582	  6	398.3	46.9	 16
583	  6	271.8	36.7	 16
584	  6	162.0	33.2	 16
585	  6	171.0	19.5	 16
586	  6	139.5	17.5	 16
587	  6	117.3	21.6	 16
588	  6	82.8	11.8	 16
589	  6	87.8	13.7	 16
590	  6	95.3	14.8	 16
591	  6	96.3	19.3	 16
592	  6	416.0	45.2	 16
593	  6	272.3	19.2	 16
594	  6	183.5	24.6	 16
595	  6	103.5	17.8	 16
596	  6	112.5	13.1	 16
597	  6	135.8	21.8	 16
598	  6	125.3	24.4	 16
599	  6	69.0	12.8	 16
600	  6	76.0	9.2	 16
601	  6	113.8	23.1	 16
602	  6	141.3	19.7	 16
603	  6	95.0	19.0	 16
604	  6	85.5	12.0	 16
605	  6	86.0	15.6	 16
606	  6	95.3	14.0	 16
607	  6	87.8	11.2	 16
608	  6	78.5	12.3	 16
609	  6	143.0	30.5	 16
610	  6	76.3	9.2	 16
611	  6	77.3	7.2	 16
612	  6	90.8	15.4	 16
613	  6	112.3	13.8	 16
614	  6	144.0	12.4	 16
615	  6	110.8	13.4	 16
616	  6	131.3	21.9	 16
617	  6	125.0	15.6	 16
618	  6	82.3	12.1	 16
619	  6	84.8	10.8	 16
620	  6	66.0	35.8	 16
621	  6	66.0	9.5	 16
622	  6	83.3	11.5	 16
623	  6	179.5	30.8	 16
624	  6	105.3	15.8	 16
625	  6	124.3	16.2	 16
626	  6	745.5	55.8	 16
627	  6	139.5	14.2	 16
628	  6	179.5	21.9	 16
629	  6	324.3	25.5	 16
630	  6	314.5	35.1	 16
631	  6	230.5	41.5	 16
632	  6	195.3	27.7	 16
633	  6	137.0	20.9	 16
634	  6	154.3	23.1	 16
635	  6	124.8	15.6	 16
636	  6	126.0	17.9	 16
637	  6	252.8	26.2	 16
638	  6	534.5	48.5	 16
639	  6	98.0	11.8	 16
640	  6	112.3	13.6	 16
641	  6	87.5	10.5	 16
642	  6	79.3	13.0	 16
643	  6	122.5	15.4	 16
644	  6	190.5	26.8	 16
645	  6	159.3	14.6	 16
646	  6	85.8	10.8	 16
647	  6	75.3	10.4	 16
648	  6	139.0	17.7	 16
649	  6	92.5	18.7	 16
650	  6	109.3	21.2	 16
651	  6	287.0	38.3	 16
652	  6	154.8	25.5	 16
653	  6	82.3	10.8	 16
654	  6	112.0	18.8	 16
655	  6	197.3	19.5	 16
656	  6	211.5	32.6	 16
657	  6	624.8	107.0	 16
658	  6	103.0	15.3	 16
659	  6	185.3	37.6	 16
660	  6	165.3	22.3	 16
661	  6	111.3	14.9	 16
662	  6	98.8	16.7	 16
663	  6	131.8	17.0	 16
664	  6	497.3	124.6	 16
665	  6	200.8	15.7	 16
666	  6	209.3	21.0	 20
667	  6	122.0	13.1	 16
668	  6	169.5	24.4	 16
669	  6	97.3	15.6	 16
670	  6	87.5	15.2	 16
671	  6	105.3	14.5	 16
672	  6	131.0	15.5	 16
673	  6	89.5	12.9	 16
674	  6	125.3	18.9	 16
675	  6	85.3	10.4	 16
676	  6	106.8	17.7	 16
677	  6	76.3	12.5	 16
678	  6	82.3	10.1	 16
679	  6	225.5	19.2	 16
680	  6	87.0	11.4	 16
681	  6	247.8	26.7	 16
682	  6	163.0	19.7	 16
683	  6	133.8	18.6	 16
684	  6	82.8	12.0	 16
685	  6	85.3	16.0	 16
686	  6	97.8	22.4	 16
687	  6	101.8	14.5	 16
688	  6	787.5	102.0	 16
689	  6	175.0	24.7	 16
690	  6	169.5	24.8	 16
691	  6	164.8	25.0	 16
692	  6	127.8	17.3	 16
693	  6	141.8	22.5	 16
694	  6	98.3	16.4	 16
695	  6	188.8	20.8	 16
696	  6	126.3	16.5	 16
697	  6	106.8	12.4	 16
698	  6	72.5	12.9	 16
699	  6	95.3	22.8	 16
700	  6	71.3	11.9	 16
701	  6	133.3	16.8	 16
702	  6	133.5	20.6	 16
703	  6	167.5	23.6	 16
704	  6	91.0	13.4	 16
705	  6	128.3	17.5	 16
706	  6	187.0	24.0	 16
707	  6	187.5	26.2	 16
708	  6	111.0	18.3	 16
709	  6	122.8	17.8	 16
710	  6	143.0	19.6	 16
711	  6	7594.8	1092.0	 16
  0	  7	174.3	25.9	 16
  1	  7	135.3	21.5	 16
  2	  7	129.0	15.3	 16
  3	  7	194.8	17.7	 16
  4	  7	111.3	14.4	 16
  5	  7	152.0	25.3	 16
  6	  7	100.5	15.7	 16
  7	  7	126.3	16.0	 16
  8	  7	193.8	20.7	 16
  9	  7	360.3	38.8	 16
 10	  7	177.8	21.2	 16
 11	  7	102.0	14.5	 16
 12	  7	6892.8	367.0	 16
 13	  7	184.0	18.7	 16
 14	  7	182.3	22.5	 16
 15	  7	178.8	19.9	 16
 16	  7	185.3	20.2	 16
 17	  7	122.5	18.7	 16
 18	  7	177.0	20.8	 16
 19	  7	6572.3	477.2	 16
 20	  7	6929.0	281.4	 16
 21	  7	7290.5	495.1	 16
 22	  7	194.5	22.3	 16
 23	  7	155.5	20.4	 16
 24	  7	7172.8	872.0	 16
 25	  7	321.5	39.5	 16
 26	  7	6842.8	694.3	 16
 27	  7	7087.3	714.7	 16
 28	  7	203.3	25.9	 16
 29	  7	117.8	12.2	 16
 30	  7	195.0	24.0	 16
 31	  7	6612.5	908.5	 16
 32	  7	7156.3	991.7	 16
 33	  7	7366.0	1130.9	 16
 34	  7	187.8	27.5	 16
 35	  7	114.8	15.8	 16
 36	  7	6706.8	508.8	 16
 37	  7	181.3	22.4	 16
 38	  7	169.8	22.1	 16
 39	  7	181.8	22.3	 16
 40	  7	185.3	24.8	 16
 41	  7	111.8	11.9	 16
 42	  7	7412.0	561.4	 16
 43	  7	201.0	18.2	 16
 44	  7	6656.8	609.0	 16
 45	  7	6846.3	571.3	 16
 46	  7	173.3	14.2	 16
 47	  7	101.8	14.6	 16
 48	  7	170.5	20.0	 16
 49	  7	166.3	15.2	 16
 50	  7	5077.8	671.5	 16
 51	  7	165.0	16.8	 16
 52	  7	170.0	19.8	 16
 53	  7	112.3	17.1	 16
 54	  7	7392.5	1262.8	 16
 55	  7	6806.0	1088.5	 16
 56	  7	6394.8	1082.6	 16
 57	  7	196.3	24.1	 16
 58	  7	181.5	22.8	 16
 59	  7	96.3	11.4	 16
 60	  7	99.3	17.0	 16
 61	  7	106.3	16.7	 16
 62	  7	7157.8	527.2	 16
 63	  7	190.0	28.4	 16
 64	  7	226.5	36.3	 16
 65	  7	215.0	31.5	 16
 66	  7	8783.5	638.5	 16
 67	  7	539.3	58.0	 16
 68	  7	7498.8	514.5	 16
 69	  7	637.8	101.6	 16
 70	  7	275.8	44.8	 16
 71	  7	199.3	37.3	 16
 72	  7	179.3	28.9	 16
 73	  7	107.8	11.6	 16
 74	  7	182.0	20.3	 16
 75	  7	162.5	28.9	 16
 76	  7	177.0	29.8	 16
 77	  7	171.5	14.9	 16
 78	  7	193.3	72.6	 16
 79	  7	104.5	14.7	 16
 80	  7	6278.0	572.4	 16
 81	  7	182.3	21.7	 16
 82	  7	169.0	16.9	 16
 83	  7	172.8	19.5	 16
 84	  7	7503.5	997.0	 16
 85	  7	127.0	24.6	 16
 86	  7	152.8	14.3	 16
 87	  7	183.0	27.1	 16
 88	  7	6321.0	975.1	 16
 89	  7	212.5	23.8	 16
 90	  7	165.5	19.4	 16
 91	  7	102.8	13.6	 16
 92	  7	155.5	20.0	 16
 93	  7	185.5	25.6	 16
 94	  7	172.0	26.8	 16
 95	  7	6660.0	1103.2	 16
 96	  7	190.3	37.3	 16
 97	  7	101.8	16.1	 16
 98	  7	175.0	23.6	 16
 99	  7	190.0	30.0	 16
100	  7	167.5	19.4	 16
101	  7	6556.5	1094.6	 20
102	  7	184.0	21.6	 16
103	  7	106.8	17.0	 16
104	  7	156.5	16.8	 16
105	  7	6992.5	705.8	 16
106	  7	181.5	13.3	 16
107	  7	7123.3	808.8	 16
108	  7	191.3	25.4	 16
109	  7	95.5	15.0	 16
110	  7	86.0	10.3	 16
111	  7	132.3	22.3	 16
112	  7	178.3	24.3	 16
113	  7	119.5	20.4	 16
114	  7	95.3	9.6	 16
115	  7	136.8	24.8	 16
116	  7	277.8	47.1	 16
117	  7	167.0	21.5	 16
118	  7	138.0	16.4	 16
119	  7	274.5	25.2	 16
120	  7	230.3	23.7	 16
121	  7	443.5	38.5	 16
122	  7	203.5	24.6	 16
123	  7	291.3	35.9	 16
124	  7	166.8	21.8	 16
125	  7	354.0	40.5	 16
126	  7	5103.0	829.8	 16
127	  7	5035.5	859.5	 16
128	  7	4536.0	950.0	 16
129	  7	177.3	17.3	 16
130	  7	132.0	17.7	 16
131	  7	1204.3	108.1	 16
132	  7	132.3	21.1	 16
133	  7	956.0	72.0	 16
134	  7	385.8	29.2	 16
135	  7	286.3	26.9	 16
136	  7	257.5	25.0	 16
137	  7	150.8	20.9	 16
138	  7	125.5	26.1	 16
139	  7	132.8	18.8	 16
140	  7	114.5	14.8	 16
141	  7	131.3	20.0	 16
142	  7	131.5	17.9	 16
143	  7	193.3	17.1	 16
144	  7	142.5	21.5	 16
145	  7	414.5	61.3	 16
146	  7	102.5	14.8	 16
147	  7	134.8	20.6	 16
148	  7	123.3	18.3	 16
149	  7	115.3	17.1	 16
150	  7	99.5	12.2	 16
151	  7	116.0	14.0	 16
152	  7	138.3	24.7	 16
153	  7	129.0	24.5	 16
154	  7	207.5	34.6	 16
155	  7	146.3	11.3	 16
156	  7	777.0	58.9	 16
157	  7	809.3	58.8	 16
158	  7	207.5	27.2	 16
159	  7	272.3	29.6	 16
160	  7	138.3	24.3	 16
161	  7	125.5	17.6	 16
162	  7	124.3	13.6	 16
163	  7	143.5	14.3	 16
164	  7	131.3	18.9	 16
165	  7	180.8	20.4	 16
166	  7	120.0	12.9	 16
167	  7	129.0	21.4	 16
168	  7	133.3	14.5	 16
169	  7	248.3	68.9	 16
170	  7	227.0	35.4	 16
171	  7	201.0	27.3	 16
172	  7	93.0	13.9	 16
173	  7	115.8	19.5	 16
174	  7	371.5	38.5	 16
175	  7	127.0	16.8	 16
176	  7	164.5	24.3	 16
177	  7	100.8	14.6	 16
178	  7	102.5	13.5	 16
179	  7	146.5	19.2	 16
180	  7	299.0	33.0	 16
181	  7	125.8	14.1	 16
182	  7	257.0	26.1	 16
183	  7	82.8	15.6	 16
184	  7	85.5	11.4	 16
185	  7	130.5	24.9	 16
186	  7	184.3	29.4	 16
187	  7	124.3	21.2	 16
188	  7	186.3	17.5	 16
189	  7	166.8	27.3	 16
190	  7	160.8	20.7	 16
191	  7	146.8	22.4	 16
192	  7	151.5	27.9	 16
193	  7	148.0	24.7	 16
194	  7	201.5	26.4	 16
195	  7	116.0	15.8	 16
196	  7	110.8	18.2	 16
197	  7	157.8	32.0	 16
198	  7	188.8	25.8	 16
199	  7	897.5	170.6	 16
200	  7	241.3	34.2	 16
201	  7	155.5	19.9	 16
202	  7	116.5	14.2	 16
203	  7	134.0	19.9	 16
204	  7	139.3	10.8	 16
205	  7	100.3	13.7	 16
206	  7	179.0	20.9	 16
207	  7	109.3	18.0	 16
208	  7	105.3	14.0	 16
209	  7	99.3	19.1	 16
210	  7	123.0	16.6	 16
211	  7	120.0	18.0	 16
212	  7	148.0	24.5	 16
213	  7	137.0	10.7	 16
214	  7	140.5	17.4	 16
215	  7	153.5	27.3	 16
216	  7	109.0	19.3	 16
217	  7	196.8	33.2	 16
218	  7	149.5	22.0	 16
219	  7	90.5	19.4	 16
220	  7	120.0	18.2	 16
221	  7	136.3	23.4	 16
222	  7	714.3	136.9	 16
223	  7	111.5	14.4	 16
224	  7	97.0	13.3	 16
225	  7	143.0	18.9	 16
226	  7	207.3	23.8	 16
227	  7	165.5	21.3	 16
228	  7	177.8	19.7	 16
229	  7	89.0	12.5	 16
230	  7	104.5	13.0	 16
231	  7	365.0	52.4	 16
232	  7	95.5	13.3	 16
233	  7	124.5	22.8	 16
234	  7	100.8	19.6	 16
235	  7	135.5	20.2	 16
236	  7	186.8	17.1	 16
237	  7	86.0	10.9	 16
238	  7	119.0	20.7	 16
239	  7	430.0	70.4	 16
240	  7	111.3	11.8	 16
241	  7	126.5	18.1	 16
242	  7	161.3	23.1	 16
243	  7	166.0	28.1	 20
244	  7	616.0	144.7	 16
245	  7	125.8	15.0	 16
246	  7	94.5	14.6	 16
247	  7	128.0	23.2	 16
248	  7	109.0	15.0	 16
249	  7	121.3	17.3	 16
250	  7	96.5	15.6	 16
251	  7	144.0	19.2	 16
252	  7	308.3	31.1	 16
253	  7	111.5	19.4	 16
254	  7	127.8	20.4	 16
255	  7	139.5	21.2	 16
256	  7	99.3	18.4	 16
257	  7	122.0	23.2	 16
258	  7	87.5	13.7	 16
259	  7	157.0	22.8	 16
260	  7	139.5	16.7	 16
261	  7	201.5	29.2	 16
262	  7	114.0	15.1	 16
263	  7	1772.5	258.0	 16
264	  7	116.3	20.8	 16
265	  7	94.3	14.4	 16
266	  7	105.0	12.9	 16
267	  7	284.8	43.9	 16
268	  7	291.0	45.8	 16
269	  7	85.0	12.2	 16
270	  7	79.0	14.0	 16
271	  7	141.0	14.9	 16
272	  7	302.5	59.9	 16
273	  7	111.3	19.1	 16
274	  7	153.5	22.0	 16
275	  7	140.8	20.0	 16
276	  7	181.8	16.8	 16
277	  7	135.5	13.2	 16
278	  7	184.8	19.1	 16
279	  7	107.0	15.5	 16
280	  7	137.0	24.4	 16
281	  7	116.0	15.0	 16
282	  7	880.5	116.8	 16
283	  7	110.8	10.0	 16
284	  7	124.8	16.0	 16
285	  7	106.8	17.8	 16
286	  7	196.8	89.3	 16
287	  7	276.3	51.7	 16
288	  7	160.0	22.0	 16
289	  7	195.5	32.3	 16
290	  7	158.3	19.3	 16
291	  7	253.8	36.3	 16
292	  7	99.8	18.0	 16
293	  7	166.0	25.3	 16
294	  7	113.5	14.4	 16
295	  7	146.0	20.3	 16
296	  7	124.5	23.3	 16
297	  7	110.3	15.3	 16
298	  7	209.5	20.1	 16
299	  7	215.8	24.2	 16
300	  7	231.5	24.3	 16
301	  7	372.0	49.0	 16
302	  7	103.8	15.3	 16
303	  7	231.3	31.2	 16
304	  7	150.3	23.3	 16
305	  7	93.3	15.5	 16
306	  7	587.0	52.3	 16
307	  7	115.3	23.5	 16
308	  7	232.5	31.5	 16
309	  7	157.8	19.6	 16
310	  7	153.8	25.6	 16
311	  7	233.3	34.0	 16
312	  7	115.5	17.1	 16
313	  7	202.3	18.2	 16
314	  7	199.0	24.6	 16
315	  7	153.8	21.5	 16
316	  7	324.3	39.0	 16
317	  7	116.8	15.3	 16
318	  7	103.0	12.8	 16
319	  7	116.0	15.1	 16
320	  7	77.3	11.7	 16
321	  7	312.5	35.8	 16
322	  7	151.3	18.4	 16
323	  7	119.3	20.5	 16
324	  7	226.8	26.4	 16
325	  7	331.3	28.0	 16
326	  7	1075.0	84.9	 16
327	  7	239.0	20.5	 16
328	  7	105.0	14.4	 16
329	  7	248.3	32.5	 16
330	  7	368.3	36.7	 16
331	  7	159.0	19.7	 16
332	  7	140.3	18.6	 16
333	  7	5538.5	526.0	 16
334	  7	4980.3	423.9	 16
335	  7	157.5	21.7	 16
336	  7	103.5	20.2	 16
337	  7	127.5	15.4	 16
338	  7	143.0	23.0	 16
339	  7	158.0	18.3	 16
340	  7	197.8	26.1	 16
341	  7	118.0	16.9	 16
342	  7	148.8	24.6	 16
343	  7	90.8	22.3	 16
344	  7	131.0	19.7	 16
345	  7	165.8	26.0	 16
346	  7	169.0	14.2	 16
347	  7	271.3	29.9	 16
348	  7	220.8	28.1	 16
349	  7	114.3	12.0	 16
350	  7	140.0	18.8	 16
351	  7	114.3	15.5	 16
352	  7	218.3	27.6	 16
353	  7	119.5	11.2	 16
354	  7	94.5	12.9	 16
355	  7	139.8	23.6	 16
356	  7	161.3	19.7	 16
357	  7	169.3	20.5	 16
358	  7	1140.8	121.5	 16
359	  7	362.5	27.5	 16
360	  7	215.5	39.6	 16
361	  7	100.0	20.5	 16
362	  7	87.5	11.2	 16
363	  7	106.0	18.5	 16
364	  7	72.5	9.0	 16
365	  7	117.3	14.5	 16
366	  7	144.3	20.7	 16
367	  7	138.8	23.0	 16
368	  7	114.8	19.9	 16
369	  7	166.3	28.2	 16
370	  7	191.0	24.6	 16
371	  7	171.3	29.3	 16
372	  7	210.0	17.6	 16
373	  7	126.3	18.2	 16
374	  7	216.8	39.6	 16
375	  7	83.3	13.0	 16
376	  7	97.8	18.4	 16
377	  7	98.3	12.8	 16
378	  7	170.5	35.8	 16
379	  7	317.0	58.2	 16
380	  7	258.5	41.5	 16
381	  7	117.3	14.5	 16
382	  7	127.0	18.7	 16
383	  7	1757.3	182.0	 16
384	  7	192.5	82.4	 16
385	  7	106.0	18.2	 20
386	  7	113.3	18.1	 16
387	  7	169.0	25.6	 16
388	  7	169.3	22.6	 16
389	  7	91.3	17.8	 16
390	  7	93.5	15.7	 16
391	  7	171.8	33.2	 16
392	  7	86.3	15.0	 16
393	  7	73.0	9.9	 16
394	  7	140.0	16.2	 16
395	  7	262.5	33.9	 16
396	  7	378.5	38.5	 16
397	  7	320.8	38.9	 16
398	  7	72.3	10.8	 16
399	  7	81.8	17.4	 16
400	  7	88.0	11.0	 16
401	  7	216.3	22.7	 16
402	  7	189.5	22.4	 16
403	  7	139.0	41.7	 16
404	  7	97.0	21.1	 16
405	  7	76.5	11.9	 16
406	  7	365.0	58.7	 16
407	  7	107.0	19.0	 16
408	  7	81.5	8.8	 16
409	  7	103.0	11.2	 16
410	  7	97.5	12.8	 16
411	  7	196.5	20.9	 16
412	  7	195.5	16.6	 16
413	  7	347.5	55.2	 16
414	  7	103.0	13.9	 16
415	  7	123.3	19.3	 16
416	  7	83.8	10.2	 16
417	  7	109.0	14.4	 16
418	  7	225.8	32.3	 16
419	  7	93.3	15.3	 16
420	  7	68.8	11.3	 16
421	  7	80.3	11.8	 16
422	  7	106.0	18.2	 16
423	  7	178.5	19.4	 16
424	  7	533.0	30.6	 16
425	  7	181.5	27.2	 16
426	  7	356.0	30.5	 16
427	  7	166.5	20.2	 16
428	  7	125.8	19.7	 16
429	  7	88.8	12.1	 16
430	  7	106.3	17.2	 16
431	  7	117.0	16.0	 16
432	  7	129.3	12.8	 16
433	  7	77.3	11.3	 16
434	  7	131.3	16.9	 16
435	  7	154.3	22.6	 16
436	  7	132.5	24.2	 16
437	  7	104.3	11.2	 16
438	  7	139.3	18.7	 16
439	  7	87.5	16.0	 16
440	  7	97.0	13.2	 16
441	  7	246.5	33.6	 16
442	  7	147.5	23.8	 16
443	  7	207.5	29.6	 16
444	  7	159.3	22.8	 16
445	  7	96.8	16.0	 16
446	  7	126.0	17.6	 16
447	  7	238.3	29.7	 16
448	  7	190.5	24.4	 16
449	  7	215.5	37.4	 16
450	  7	265.3	31.2	 16
451	  7	112.5	21.5	 16
452	  7	257.8	29.4	 16
453	  7	227.3	28.3	 16
454	  7	457.3	58.1	 16
455	  7	193.8	16.1	 16
456	  7	198.8	26.8	 16
457	  7	84.0	13.1	 16
458	  7	83.3	10.5	 16
459	  7	144.0	27.7	 16
460	  7	316.8	45.5	 16
461	  7	84.8	10.7	 16
462	  7	461.0	96.2	 16
463	  7	88.0	12.8	 16
464	  7	67.3	8.7	 16
465	  7	86.3	14.1	 16
466	  7	136.8	17.1	 16
467	  7	180.5	17.9	 16
468	  7	103.8	14.2	 16
469	  7	97.8	20.0	 16
470	  7	174.0	20.4	 16
471	  7	105.0	14.0	 16
472	  7	83.8	10.9	 16
473	  7	82.3	11.3	 16
474	  7	75.5	11.7	 16
475	  7	110.5	26.4	 16
476	  7	79.3	10.7	 16
477	  7	114.5	15.0	 16
478	  7	83.8	10.6	 16
479	  7	85.5	13.9	 16
480	  7	71.5	12.9	 16
481	  7	86.0	17.4	 16
482	  7	129.8	21.5	 16
483	  7	284.0	44.3	 16
484	  7	90.0	16.2	 16
485	  7	165.5	27.7	 16
486	  7	175.3	30.1	 16
487	  7	203.5	22.3	 16
488	  7	252.0	34.5	 16
489	  7	73.0	13.6	 16
490	  7	98.3	19.3	 16
491	  7	91.3	13.2	 16
492	  7	82.0	10.4	 16
493	  7	198.5	34.8	 16
494	  7	197.0	22.8	 16
495	  7	393.0	45.4	 16
496	  7	109.0	19.2	 16
497	  7	145.0	22.5	 16
498	  7	151.0	26.6	 16
499	  7	175.5	32.1	 16
500	  7	133.5	18.9	 16
501	  7	117.8	18.2	 16
502	  7	403.5	53.3	 16
503	  7	636.5	68.2	 16
504	  7	160.3	21.1	 16
505	  7	252.5	41.6	 16
506	  7	164.0	18.0	 16
507	  7	171.3	22.6	 16
508	  7	109.0	15.6	 16
509	  7	163.0	27.1	 16
510	  7	111.0	19.8	 16
511	  7	128.3	23.9	 16
512	  7	94.5	13.6	 16
513	  7	88.3	12.5	 16
514	  7	75.0	11.8	 16
515	  7	79.8	16.1	 16
516	  7	84.5	13.4	 16
517	  7	325.3	54.0	 16
518	  7	128.8	14.2	 16
519	  7	134.3	21.2	 16
520	  7	94.3	18.5	 16
521	  7	122.3	13.8	 16
522	  7	108.0	18.6	 16
523	  7	143.8	19.1	 16
524	  7	116.3	10.9	 16
525	  7	83.0	11.8	 16
526	  7	67.5	10.7	 16
527	  7	109.0	16.8	 16
528	  7	115.3	18.5	 20
529	  7	94.3	14.8	 16
530	  7	149.3	21.6	 16
531	  7	122.3	24.4	 16
532	  7	229.8	21.7	 16
533	  7	79.0	14.0	 16
534	  7	129.0	16.2	 16
535	  7	131.0	20.4	 16
536	  7	220.8	31.2	 16
537	  7	152.0	21.8	 16
538	  7	167.8	28.3	 16
539	  7	697.3	86.8	 16
540	  7	260.8	43.4	 16
541	  7	122.3	19.0	 16
542	  7	87.5	14.8	 16
543	  7	75.5	16.0	 16
544	  7	83.3	19.4	 16
545	  7	95.3	17.5	 16
546	  7	126.5	19.9	 16
547	  7	142.0	17.6	 16
548	  7	333.3	34.4	 16
549	  7	245.0	27.1	 16
550	  7	110.8	12.7	 16
551	  7	186.8	26.6	 16
552	  7	202.0	27.5	 16
553	  7	119.8	22.1	 16
554	  7	105.8	14.0	 16
555	  7	81.3	14.3	 16
556	  7	83.0	16.0	 16
557	  7	102.0	19.8	 16
558	  7	245.8	38.2	 16
559	  7	495.3	39.9	 16
560	  7	79.3	11.9	 16
561	  7	146.5	24.3	 16
562	  7	187.5	28.1	 16
563	  7	342.5	30.6	 16
564	  7	98.8	11.2	 16
565	  7	229.3	43.2	 16
566	  7	82.3	18.4	 16
567	  7	69.3	17.8	 16
568	  7	118.3	14.9	 16
569	  7	224.0	35.9	 16
570	  7	128.3	19.8	 16
571	  7	125.5	18.8	 16
572	  7	112.0	17.8	 16
573	  7	120.5	20.2	 16
574	  7	111.3	14.5	 16
575	  7	192.5	40.0	 16
576	  7	96.0	13.4	 16
577	  7	356.8	65.4	 16
578	  7	98.8	16.8	 16
579	  7	97.0	12.1	 16
580	  7	148.8	34.4	 16
581	  7	166.0	20.9	 16
582	  7	257.0	37.8	 16
583	  7	85.0	14.7	 16
584	  7	122.3	19.2	 16
585	  7	164.0	27.2	 16
586	  7	83.3	10.5	 16
587	  7	111.0	16.7	 16
588	  7	98.3	18.6	 16
589	  7	119.0	16.8	 16
590	  7	122.0	16.9	 16
591	  7	115.3	17.7	 16
592	  7	966.8	212.6	 16
593	  7	280.5	42.1	 16
594	  7	96.3	14.8	 16
595	  7	80.5	14.4	 16
596	  7	132.8	25.1	 16
597	  7	96.8	11.6	 16
598	  7	189.5	32.2	 16
599	  7	91.5	10.5	 16
600	  7	81.5	13.7	 16
601	  7	76.0	12.8	 16
602	  7	72.8	9.6	 16
603	  7	119.5	12.1	 16
604	  7	292.3	59.9	 16
605	  7	112.3	16.0	 16
606	  7	103.5	14.7	 16
607	  7	127.0	17.8	 16
608	  7	82.3	12.1	 16
609	  7	135.5	49.0	 16
610	  7	275.3	55.0	 16
611	  7	676.0	143.2	 16
612	  7	137.8	17.0	 16
613	  7	120.5	17.0	 16
614	  7	116.0	15.0	 16
615	  7	117.0	14.7	 16
616	  7	117.5	18.9	 16
617	  7	205.0	21.1	 16
618	  7	88.3	13.5	 16
619	  7	152.8	20.2	 16
620	  7	149.5	19.2	 16
621	  7	244.3	33.0	 16
622	  7	129.8	18.7	 16
623	  7	102.5	22.3	 16
624	  7	69.5	9.8	 16
625	  7	283.5	42.4	 16
626	  7	126.5	16.4	 16
627	  7	323.3	62.2	 16
628	  7	367.5	20.7	 16
629	  7	353.8	54.5	 16
630	  7	567.3	46.4	 16
631	  7	645.8	39.3	 16
632	  7	344.8	54.3	 16
633	  7	240.5	30.5	 16
634	  7	141.3	16.1	 16
635	  7	125.3	22.9	 16
636	  7	140.5	23.5	 16
637	  7	397.0	72.6	 16
638	  7	93.3	17.4	 16
639	  7	160.3	23.9	 16
640	  7	74.0	10.7	 16
641	  7	126.5	21.0	 16
642	  7	160.3	23.7	 16
643	  7	78.0	15.7	 16
644	  7	517.3	75.1	 16
645	  7	131.0	20.6	 16
646	  7	217.0	44.5	 16
647	  7	256.3	38.1	 16
648	  7	247.0	45.5	 16
649	  7	391.5	91.2	 16
650	  7	92.0	15.9	 16
651	  7	113.3	19.9	 16
652	  7	143.0	21.9	 16
653	  7	133.8	19.7	 16
654	  7	127.3	18.9	 16
655	  7	124.0	24.6	 16
656	  7	98.0	13.5	 16
657	  7	100.8	14.9	 16
658	  7	129.5	16.3	 16
659	  7	344.3	66.3	 16
660	  7	106.8	22.5	 16
661	  7	153.0	18.6	 16
662	  7	89.5	14.3	 16
663	  7	153.3	29.6	 16
664	  7	192.0	27.0	 16
665	  7	220.8	30.3	 16
666	  7	202.3	24.8	 16
667	  7	226.5	30.4	 16
668	  7	330.5	70.8	 16
669	  7	190.3	29.0	 16
670	  7	256.0	50.5	 20
671	  7	88.5	19.1	 16
672	  7	107.0	12.3	 16
673	  7	92.0	15.4	 16
674	  7	99.8	15.6	 16
675	  7	89.3	16.1	 16
676	  7	533.3	62.7	 16
677	  7	86.0	10.2	 16
678	  7	252.0	29.2	 16
679	  7	166.5	22.6	 16
680	  7	180.5	24.7	 16
681	  7	196.5	20.1	 16
682	  7	132.0	16.9	 16
683	  7	276.5	31.7	 16
684	  7	179.3	12.3	 16
685	  7	175.3	17.3	 16
686	  7	283.3	29.9	 16
687	  7	1863.8	241.4	 16
688	  7	154.0	18.4	 16
689	  7	141.5	23.9	 16
690	  7	129.0	16.3	 16
691	  7	165.3	27.4	 16
692	  7	186.8	29.7	 16
693	  7	354.3	52.3	 16
694	  7	105.5	14.5	 16
695	  7	94.5	19.3	 16
696	  7	80.8	9.4	 16
697	  7	97.3	16.6	 16
698	  7	86.0	13.4	 16
699	  7	187.5	31.4	 16
700	  7	149.0	20.5	 16
701	  7	112.3	13.8	 16
702	  7	176.8	20.9	 16
703	  7	100.5	15.8	 16
704	  7	119.8	20.4	 16
705	  7	126.5	26.3	 16
706	  7	247.3	26.1	 16
707	  7	223.0	40.5	 16
708	  7	151.3	24.2	 16
709	  7	159.5	20.0	 16
710	  7	167.3	14.8	 16
711	  7	157.0	28.3	 16
  0	  8	5133.3	522.3	 16
  1	  8	132.0	19.9	 16
  2	  8	131.3	14.6	 16
  3	  8	186.0	29.6	 16
  4	  8	111.5	20.5	 16
  5	  8	99.3	18.7	 16
  6	  8	109.5	15.1	 16
  7	  8	106.5	23.1	 16
  8	  8	140.3	19.2	 16
  9	  8	370.8	50.8	 16
 10	  8	190.0	24.9	 16
 11	  8	100.0	12.8	 16
 12	  8	6818.8	340.4	 16
 13	  8	181.8	14.0	 16
 14	  8	196.8	27.5	 16
 15	  8	7730.0	976.0	 16
 16	  8	8842.5	361.5	 16
 17	  8	128.5	17.0	 16
 18	  8	7699.8	564.3	 16
 19	  8	190.0	18.0	 16
 20	  8	190.5	12.7	 16
 21	  8	197.5	21.1	 16
 22	  8	7892.0	485.0	 16
 23	  8	133.0	12.4	 16
 24	  8	7906.5	250.0	 16
 25	  8	6738.5	658.6	 16
 26	  8	202.3	23.6	 16
 27	  8	186.5	25.2	 16
 28	  8	8150.8	819.5	 16
 29	  8	128.5	23.3	 16
 30	  8	7665.0	973.9	 16
 31	  8	190.3	20.0	 16
 32	  8	193.8	26.2	 16
 33	  8	186.5	22.2	 16
 34	  8	7880.3	1164.1	 16
 35	  8	128.8	24.2	 16
 36	  8	6419.5	490.0	 16
 37	  8	195.8	25.1	 16
 38	  8	187.0	36.5	 16
 39	  8	175.3	22.1	 16
 40	  8	182.0	27.3	 16
 41	  8	113.0	15.0	 16
 42	  8	7994.3	222.5	 16
 43	  8	6879.5	623.1	 16
 44	  8	182.3	20.9	 16
 45	  8	182.3	21.3	 16
 46	  8	7046.0	431.8	 16
 47	  8	111.0	21.0	 16
 48	  8	167.3	21.6	 16
 49	  8	167.3	16.8	 16
 50	  8	163.5	23.1	 16
 51	  8	173.0	21.3	 16
 52	  8	168.0	21.3	 16
 53	  8	116.3	14.5	 16
 54	  8	7716.8	455.4	 16
 55	  8	202.5	26.1	 16
 56	  8	186.0	19.6	 16
 57	  8	6468.3	883.9	 16
 58	  8	192.0	22.9	 16
 59	  8	100.5	14.4	 16
 60	  8	99.0	12.2	 16
 61	  8	109.3	13.9	 16
 62	  8	7731.5	338.6	 16
 63	  8	6942.8	397.1	 16
 64	  8	7649.8	543.7	 16
 65	  8	8259.3	524.8	 16
 66	  8	9184.0	303.4	 16
 67	  8	353.8	59.4	 16
 68	  8	7137.0	460.6	 16
 69	  8	424.0	74.0	 16
 70	  8	244.5	32.0	 16
 71	  8	7235.3	847.1	 16
 72	  8	7504.5	717.1	 16
 73	  8	133.3	27.6	 16
 74	  8	183.8	26.1	 16
 75	  8	5769.3	767.7	 16
 76	  8	6080.3	645.6	 16
 77	  8	6393.5	679.1	 16
 78	  8	190.5	21.2	 16
 79	  8	101.3	12.8	 16
 80	  8	6050.8	471.9	 16
 81	  8	189.0	22.2	 16
 82	  8	154.8	19.3	 16
 83	  8	150.8	24.6	 16
 84	  8	7415.3	938.0	 16
 85	  8	133.0	28.1	 16
 86	  8	155.0	20.8	 16
 87	  8	157.0	19.6	 16
 88	  8	6149.8	850.8	 16
 89	  8	189.3	25.5	 16
 90	  8	163.0	22.3	 16
 91	  8	103.5	12.4	 16
 92	  8	175.3	26.5	 16
 93	  8	6056.8	1148.7	 16
 94	  8	6467.5	417.8	 16
 95	  8	198.0	21.6	 16
 96	  8	182.8	25.9	 16
 97	  8	94.3	17.1	 16
 98	  8	171.8	23.2	 16
 99	  8	6013.0	1161.1	 16
100	  8	6328.3	660.2	 16
101	  8	187.0	18.7	 16
102	  8	170.0	14.3	 16
103	  8	95.0	14.3	 16
104	  8	180.5	22.7	 16
105	  8	7164.5	1140.8	 20
106	  8	7073.8	1103.9	 16
107	  8	7488.0	1382.3	 16
108	  8	184.8	34.1	 16
109	  8	89.5	11.4	 16
110	  8	79.0	8.6	 16
111	  8	141.3	22.2	 16
112	  8	153.0	18.1	 16
113	  8	165.3	18.3	 16
114	  8	103.3	12.9	 16
115	  8	132.8	18.9	 16
116	  8	154.5	22.6	 16
117	  8	159.3	27.0	 16
118	  8	130.5	20.5	 16
119	  8	224.0	26.8	 16
120	  8	223.3	24.1	 16
121	  8	298.0	33.3	 16
122	  8	206.0	21.5	 16
123	  8	158.0	21.8	 16
124	  8	147.0	21.1	 16
125	  8	543.3	41.1	 16
126	  8	1080.5	176.4	 16
127	  8	988.3	129.4	 16
128	  8	846.3	177.5	 16
129	  8	111.3	16.3	 16
130	  8	107.8	13.6	 16
131	  8	337.5	60.7	 16
132	  8	91.5	16.3	 16
133	  8	215.8	30.2	 16
134	  8	1411.8	191.8	 16
135	  8	479.0	57.2	 16
136	  8	209.3	39.7	 16
137	  8	124.8	17.4	 16
138	  8	132.8	19.7	 16
139	  8	101.0	15.1	 16
140	  8	108.0	16.7	 16
141	  8	148.0	22.1	 16
142	  8	144.8	23.0	 16
143	  8	109.5	17.0	 16
144	  8	128.0	18.4	 16
145	  8	141.0	26.5	 16
146	  8	104.5	14.2	 16
147	  8	111.8	13.6	 16
148	  8	106.8	20.8	 16
149	  8	116.8	23.1	 16
150	  8	105.3	12.8	 16
151	  8	106.3	14.9	 16
152	  8	120.0	23.6	 16
153	  8	123.0	20.6	 16
154	  8	161.3	25.8	 16
155	  8	148.8	26.1	 16
156	  8	471.3	48.6	 16
157	  8	519.8	49.0	 16
158	  8	201.3	33.7	 16
159	  8	344.8	33.9	 16
160	  8	155.0	22.2	 16
161	  8	104.5	13.0	 16
162	  8	183.8	23.8	 16
163	  8	150.3	25.3	 16
164	  8	103.0	10.1	 16
165	  8	159.8	21.5	 16
166	  8	121.8	15.7	 16
167	  8	92.0	11.8	 16
168	  8	132.8	17.5	 16
169	  8	130.3	16.0	 16
170	  8	102.3	13.4	 16
171	  8	121.0	17.5	 16
172	  8	93.3	14.7	 16
173	  8	98.3	13.4	 16
174	  8	116.0	13.0	 16
175	  8	140.0	20.8	 16
176	  8	112.3	14.6	 16
177	  8	88.8	13.9	 16
178	  8	115.0	17.5	 16
179	  8	146.8	19.2	 16
180	  8	270.3	19.9	 16
181	  8	119.0	13.7	 16
182	  8	111.0	16.5	 16
183	  8	81.8	11.2	 16
184	  8	84.8	12.9	 16
185	  8	135.0	26.7	 16
186	  8	182.0	25.1	 16
187	  8	102.5	17.1	 16
188	  8	139.5	27.6	 16
189	  8	183.5	22.0	 16
190	  8	139.3	13.4	 16
191	  8	145.0	17.3	 16
192	  8	107.5	15.8	 16
193	  8	118.8	21.3	 16
194	  8	160.8	26.7	 16
195	  8	101.3	14.3	 16
196	  8	116.0	15.6	 16
197	  8	149.5	17.6	 16
198	  8	154.3	12.1	 16
199	  8	187.0	26.9	 16
200	  8	169.0	19.3	 16
201	  8	132.3	16.7	 16
202	  8	127.0	34.9	 16
203	  8	106.0	14.6	 16
204	  8	113.5	15.6	 16
205	  8	81.3	11.5	 16
206	  8	145.3	22.7	 16
207	  8	103.8	17.2	 16
208	  8	92.5	11.2	 16
209	  8	90.3	13.7	 16
210	  8	108.3	12.9	 16
211	  8	187.0	23.4	 16
212	  8	99.5	8.8	 16
213	  8	105.5	13.4	 16
214	  8	114.0	26.5	 16
215	  8	126.0	16.9	 16
216	  8	94.8	13.7	 16
217	  8	122.0	18.7	 16
218	  8	142.8	19.0	 16
219	  8	113.3	33.6	 16
220	  8	87.3	9.9	 16
221	  8	111.3	15.6	 16
222	  8	109.3	19.1	 16
223	  8	109.5	16.2	 16
224	  8	91.5	9.9	 16
225	  8	142.0	18.4	 16
226	  8	186.0	21.2	 16
227	  8	159.3	20.4	 16
228	  8	154.3	29.3	 16
229	  8	89.3	18.0	 16
230	  8	99.0	18.6	 16
231	  8	106.8	18.9	 16
232	  8	84.8	13.7	 16
233	  8	119.8	16.5	 16
234	  8	104.0	14.6	 16
235	  8	138.0	24.5	 16
236	  8	155.0	20.3	 16
237	  8	99.5	15.6	 16
238	  8	80.0	16.0	 16
239	  8	196.8	23.6	 16
240	  8	108.5	13.4	 16
241	  8	112.5	18.1	 16
242	  8	137.0	21.5	 16
243	  8	117.3	18.0	 16
244	  8	120.3	21.5	 16
245	  8	106.5	15.5	 16
246	  8	87.3	15.8	 16
247	  8	109.3	10.6	 20
248	  8	95.3	13.1	 16
249	  8	97.8	11.5	 16
250	  8	101.8	12.8	 16
251	  8	188.0	21.1	 16
252	  8	219.5	34.2	 16
253	  8	85.5	11.7	 16
254	  8	103.5	10.4	 16
255	  8	131.0	12.9	 16
256	  8	96.8	12.7	 16
257	  8	142.3	20.1	 16
258	  8	93.8	11.4	 16
259	  8	117.3	20.8	 16
260	  8	120.8	19.9	 16
261	  8	161.3	23.9	 16
262	  8	121.0	19.1	 16
263	  8	478.8	50.3	 16
264	  8	71.8	10.7	 16
265	  8	101.0	20.6	 16
266	  8	103.3	16.8	 16
267	  8	131.8	23.3	 16
268	  8	166.0	25.4	 16
269	  8	85.0	10.6	 16
270	  8	95.5	17.1	 16
271	  8	205.0	26.2	 16
272	  8	232.8	27.2	 16
273	  8	89.3	12.7	 16
274	  8	106.5	15.8	 16
275	  8	129.3	18.3	 16
276	  8	227.0	25.6	 16
277	  8	154.0	24.4	 16
278	  8	146.5	20.1	 16
279	  8	109.5	20.5	 16
280	  8	121.3	17.9	 16
281	  8	128.3	17.8	 16
282	  8	233.8	32.1	 16
283	  8	133.8	15.3	 16
284	  8	102.5	19.4	 16
285	  8	83.0	13.4	 16
286	  8	131.3	26.3	 16
287	  8	115.5	16.4	 16
288	  8	111.8	16.9	 16
289	  8	214.0	25.9	 16
290	  8	199.3	22.4	 16
291	  8	159.8	24.7	 16
292	  8	106.5	11.4	 16
293	  8	167.3	17.9	 16
294	  8	148.5	18.1	 16
295	  8	155.0	18.3	 16
296	  8	152.0	25.4	 16
297	  8	99.0	13.6	 16
298	  8	231.0	27.0	 16
299	  8	201.0	21.6	 16
300	  8	245.5	22.6	 16
301	  8	161.8	26.7	 16
302	  8	94.3	14.6	 16
303	  8	119.0	15.8	 16
304	  8	128.3	28.4	 16
305	  8	97.5	14.4	 16
306	  8	281.5	28.8	 16
307	  8	111.8	16.2	 16
308	  8	140.3	18.8	 16
309	  8	146.3	21.0	 16
310	  8	146.5	24.6	 16
311	  8	232.8	26.7	 16
312	  8	111.3	12.1	 16
313	  8	257.0	32.8	 16
314	  8	225.5	38.6	 16
315	  8	148.8	18.2	 16
316	  8	157.0	23.1	 16
317	  8	93.3	15.0	 16
318	  8	107.3	11.3	 16
319	  8	95.5	11.9	 16
320	  8	88.3	15.5	 16
321	  8	147.3	21.0	 16
322	  8	125.3	21.7	 16
323	  8	96.0	14.3	 16
324	  8	193.3	23.9	 16
325	  8	237.3	33.5	 16
326	  8	763.3	74.3	 16
327	  8	155.3	22.4	 16
328	  8	118.8	18.7	 16
329	  8	226.3	17.8	 16
330	  8	533.0	50.3	 16
331	  8	186.0	24.6	 16
332	  8	126.0	14.0	 16
333	  8	1417.8	133.2	 16
334	  8	1363.3	176.5	 16
335	  8	136.3	16.6	 16
336	  8	95.5	14.1	 16
337	  8	120.8	17.2	 16
338	  8	119.5	15.3	 16
339	  8	117.3	16.9	 16
340	  8	210.0	27.6	 16
341	  8	125.3	13.7	 16
342	  8	107.3	16.4	 16
343	  8	84.8	15.8	 16
344	  8	119.3	18.1	 16
345	  8	129.8	15.0	 16
346	  8	228.3	26.2	 16
347	  8	453.8	38.0	 16
348	  8	194.3	27.0	 16
349	  8	105.8	14.0	 16
350	  8	145.3	17.0	 16
351	  8	106.3	14.5	 16
352	  8	140.3	26.1	 16
353	  8	98.8	11.8	 16
354	  8	93.3	15.2	 16
355	  8	161.3	19.1	 16
356	  8	135.5	20.3	 16
357	  8	175.5	16.8	 16
358	  8	756.3	76.3	 16
359	  8	298.5	26.8	 16
360	  8	119.3	17.0	 16
361	  8	82.8	12.7	 16
362	  8	84.3	15.6	 16
363	  8	105.3	13.6	 16
364	  8	66.3	9.1	 16
365	  8	103.3	12.2	 16
366	  8	122.0	18.1	 16
367	  8	121.3	16.9	 16
368	  8	122.8	17.5	 16
369	  8	183.0	29.3	 16
370	  8	134.8	19.0	 16
371	  8	135.5	15.3	 16
372	  8	132.5	22.1	 16
373	  8	143.3	21.8	 16
374	  8	95.5	16.4	 16
375	  8	70.5	15.8	 16
376	  8	89.8	12.9	 16
377	  8	98.8	15.2	 16
378	  8	211.3	26.0	 16
379	  8	133.0	24.1	 16
380	  8	153.5	17.6	 16
381	  8	85.8	12.0	 16
382	  8	97.3	18.6	 16
383	  8	1162.8	153.3	 16
384	  8	194.5	77.5	 16
385	  8	107.8	18.3	 16
386	  8	98.8	14.4	 16
387	  8	176.5	24.6	 16
388	  8	233.3	21.7	 16
389	  8	75.5	13.3	 20
390	  8	84.5	15.8	 16
391	  8	79.3	10.0	 16
392	  8	76.3	9.6	 16
393	  8	80.5	11.9	 16
394	  8	150.5	13.3	 16
395	  8	218.3	26.7	 16
396	  8	212.0	24.5	 16
397	  8	198.0	32.2	 16
398	  8	77.5	9.4	 16
399	  8	92.0	14.5	 16
400	  8	97.8	17.3	 16
401	  8	314.3	30.3	 16
402	  8	92.5	16.7	 16
403	  8	110.0	16.3	 16
404	  8	85.8	10.8	 16
405	  8	74.5	9.9	 16
406	  8	123.3	15.6	 16
407	  8	91.0	16.4	 16
408	  8	85.0	13.0	 16
409	  8	100.5	14.9	 16
410	  8	99.5	17.2	 16
411	  8	213.5	26.1	 16
412	  8	137.8	16.5	 16
413	  8	148.0	18.0	 16
414	  8	99.0	11.2	 16
415	  8	144.3	20.4	 16
416	  8	73.8	13.4	 16
417	  8	86.5	17.1	 16
418	  8	107.5	15.5	 16
419	  8	82.3	11.5	 16
420	  8	63.3	9.6	 16
421	  8	80.5	14.0	 16
422	  8	98.5	15.4	 16
423	  8	178.3	23.5	 16
424	  8	521.5	28.9	 16
425	  8	160.8	26.8	 16
426	  8	397.8	39.2	 16
427	  8	105.5	21.2	 16
428	  8	87.3	14.0	 16
429	  8	84.8	10.5	 16
430	  8	121.0	21.0	 16
431	  8	115.5	18.7	 16
432	  8	97.0	14.9	 16
433	  8	76.5	12.4	 16
434	  8	114.3	14.8	 16
435	  8	146.3	26.3	 16
436	  8	112.8	15.5	 16
437	  8	120.0	16.8	 16
438	  8	218.3	39.3	 16
439	  8	85.5	16.3	 16
440	  8	88.5	12.0	 16
441	  8	139.5	69.5	 16
442	  8	99.5	15.9	 16
443	  8	140.8	17.6	 16
444	  8	108.5	13.3	 16
445	  8	84.3	15.1	 16
446	  8	98.3	9.6	 16
447	  8	115.8	13.5	 16
448	  8	200.3	26.1	 16
449	  8	1041.0	110.6	 16
450	  8	175.0	19.9	 16
451	  8	88.8	14.7	 16
452	  8	194.8	22.2	 16
453	  8	164.5	22.9	 16
454	  8	319.3	40.0	 16
455	  8	148.5	22.9	 16
456	  8	136.3	19.0	 16
457	  8	77.5	15.8	 16
458	  8	105.0	16.2	 16
459	  8	103.3	19.3	 16
460	  8	254.8	34.8	 16
461	  8	91.8	13.1	 16
462	  8	122.3	17.9	 16
463	  8	99.5	11.7	 16
464	  8	72.5	11.1	 16
465	  8	80.5	14.3	 16
466	  8	96.0	17.7	 16
467	  8	150.3	17.5	 16
468	  8	112.5	13.9	 16
469	  8	115.0	17.2	 16
470	  8	131.0	17.6	 16
471	  8	83.8	14.6	 16
472	  8	98.8	19.1	 16
473	  8	126.5	15.5	 16
474	  8	78.0	13.2	 16
475	  8	90.5	15.6	 16
476	  8	73.5	11.8	 16
477	  8	85.0	6.5	 16
478	  8	80.3	15.3	 16
479	  8	77.8	9.3	 16
480	  8	78.0	12.1	 16
481	  8	75.8	11.0	 16
482	  8	88.0	14.1	 16
483	  8	138.3	19.4	 16
484	  8	149.5	19.2	 16
485	  8	227.0	27.2	 16
486	  8	182.8	22.2	 16
487	  8	217.3	24.1	 16
488	  8	215.5	19.9	 16
489	  8	78.5	16.6	 16
490	  8	101.8	11.5	 16
491	  8	79.3	11.2	 16
492	  8	95.3	9.8	 16
493	  8	171.0	18.5	 16
494	  8	196.3	30.9	 16
495	  8	216.5	21.0	 16
496	  8	103.5	13.8	 16
497	  8	115.0	18.5	 16
498	  8	164.8	26.5	 16
499	  8	99.3	13.5	 16
500	  8	96.5	18.5	 16
501	  8	135.5	11.0	 16
502	  8	192.0	23.3	 16
503	  8	200.3	42.5	 16
504	  8	122.8	16.0	 16
505	  8	102.3	14.4	 16
506	  8	129.0	23.2	 16
507	  8	140.3	15.9	 16
508	  8	91.0	14.9	 16
509	  8	86.0	12.9	 16
510	  8	96.5	16.0	 16
511	  8	112.3	17.8	 16
512	  8	79.0	13.3	 16
513	  8	84.3	12.5	 16
514	  8	70.0	11.4	 16
515	  8	84.0	12.9	 16
516	  8	76.8	15.8	 16
517	  8	100.3	16.1	 16
518	  8	134.0	29.4	 16
519	  8	250.3	31.0	 16
520	  8	138.0	11.3	 16
521	  8	107.5	11.6	 16
522	  8	108.8	17.7	 16
523	  8	127.8	15.0	 16
524	  8	129.3	24.4	 16
525	  8	78.5	17.2	 16
526	  8	69.0	12.4	 16
527	  8	99.3	16.1	 16
528	  8	141.0	17.1	 16
529	  8	83.3	16.6	 16
530	  8	169.0	21.8	 16
531	  8	306.8	56.2	 16
532	  8	214.3	29.2	 20
533	  8	70.8	11.7	 16
534	  8	104.0	18.0	 16
535	  8	115.3	16.7	 16
536	  8	103.0	20.8	 16
537	  8	101.8	16.9	 16
538	  8	266.5	28.6	 16
539	  8	319.5	24.8	 16
540	  8	240.5	48.4	 16
541	  8	118.0	8.8	 16
542	  8	76.5	11.8	 16
543	  8	79.3	11.8	 16
544	  8	79.8	9.8	 16
545	  8	79.0	11.1	 16
546	  8	87.5	12.9	 16
547	  8	109.0	14.7	 16
548	  8	274.3	39.7	 16
549	  8	156.8	20.8	 16
550	  8	111.3	16.1	 16
551	  8	167.8	20.7	 16
552	  8	219.3	25.6	 16
553	  8	151.3	21.4	 16
554	  8	80.8	9.2	 16
555	  8	75.5	13.6	 16
556	  8	71.3	11.4	 16
557	  8	83.8	17.2	 16
558	  8	200.5	24.5	 16
559	  8	355.0	42.7	 16
560	  8	72.5	14.7	 16
561	  8	120.3	18.8	 16
562	  8	144.5	16.8	 16
563	  8	567.5	45.9	 16
564	  8	102.5	22.0	 16
565	  8	110.5	21.0	 16
566	  8	84.5	14.2	 16
567	  8	72.0	12.4	 16
568	  8	95.3	10.8	 16
569	  8	179.3	21.9	 16
570	  8	144.3	19.7	 16
571	  8	97.8	15.3	 16
572	  8	106.5	15.1	 16
573	  8	131.3	21.7	 16
574	  8	132.3	19.9	 16
575	  8	111.3	17.2	 16
576	  8	102.3	17.4	 16
577	  8	109.8	20.4	 16
578	  8	76.3	9.0	 16
579	  8	78.3	18.2	 16
580	  8	106.3	17.4	 16
581	  8	114.3	12.1	 16
582	  8	148.5	23.1	 16
583	  8	85.3	23.6	 16
584	  8	85.3	10.5	 16
585	  8	118.3	14.8	 16
586	  8	86.3	14.9	 16
587	  8	84.0	10.6	 16
588	  8	60.5	9.2	 16
589	  8	118.0	11.2	 16
590	  8	119.8	13.3	 16
591	  8	115.0	16.3	 16
592	  8	209.5	30.5	 16
593	  8	127.0	15.5	 16
594	  8	92.5	11.8	 16
595	  8	91.3	10.3	 16
596	  8	175.8	26.6	 16
597	  8	105.3	12.7	 16
598	  8	171.0	18.9	 16
599	  8	90.8	20.2	 16
600	  8	85.8	13.7	 16
601	  8	78.0	10.7	 16
602	  8	70.5	12.4	 16
603	  8	129.3	16.7	 16
604	  8	169.3	20.4	 16
605	  8	103.3	11.9	 16
606	  8	72.0	12.8	 16
607	  8	94.3	20.3	 16
608	  8	80.3	12.5	 16
609	  8	108.8	15.7	 16
610	  8	76.3	11.3	 16
611	  8	121.3	27.4	 16
612	  8	126.3	20.9	 16
613	  8	92.3	14.4	 16
614	  8	105.8	18.6	 16
615	  8	181.5	21.4	 16
616	  8	127.5	22.1	 16
617	  8	206.8	19.9	 16
618	  8	86.5	15.1	 16
619	  8	113.3	13.5	 16
620	  8	86.5	16.5	 16
621	  8	164.5	22.9	 16
622	  8	87.0	13.7	 16
623	  8	121.3	15.9	 16
624	  8	79.3	10.4	 16
625	  8	180.8	25.8	 16
626	  8	106.0	10.6	 16
627	  8	362.5	47.1	 16
628	  8	259.3	25.0	 16
629	  8	270.0	55.9	 16
630	  8	522.3	43.4	 16
631	  8	610.5	58.2	 16
632	  8	225.5	51.7	 16
633	  8	144.0	26.0	 16
634	  8	163.0	24.7	 16
635	  8	117.3	11.6	 16
636	  8	81.5	12.6	 16
637	  8	119.3	18.3	 16
638	  8	72.5	13.0	 16
639	  8	76.3	7.5	 16
640	  8	72.0	16.7	 16
641	  8	119.3	18.9	 16
642	  8	150.3	18.5	 16
643	  8	83.0	15.6	 16
644	  8	445.3	51.7	 16
645	  8	126.3	15.2	 16
646	  8	266.3	41.4	 16
647	  8	205.3	21.8	 16
648	  8	201.5	33.7	 16
649	  8	180.3	18.4	 16
650	  8	93.0	13.7	 16
651	  8	85.3	15.6	 16
652	  8	119.8	19.3	 16
653	  8	114.3	15.4	 16
654	  8	83.3	12.5	 16
655	  8	109.3	13.1	 16
656	  8	78.0	12.6	 16
657	  8	90.3	12.1	 16
658	  8	93.5	10.4	 16
659	  8	260.5	34.3	 16
660	  8	85.8	14.2	 16
661	  8	105.0	18.7	 16
662	  8	76.0	11.4	 16
663	  8	80.5	13.5	 16
664	  8	132.8	24.3	 16
665	  8	237.5	37.4	 16
666	  8	225.5	29.0	 16
667	  8	247.3	38.2	 16
668	  8	170.8	21.4	 16
669	  8	204.3	26.8	 16
670	  8	188.5	22.3	 16
671	  8	79.8	13.5	 16
672	  8	100.5	10.8	 16
673	  8	96.3	19.3	 16
674	  8	83.3	14.0	 20
675	  8	92.0	16.5	 16
676	  8	120.8	15.3	 16
677	  8	79.3	11.4	 16
678	  8	248.5	26.2	 16
679	  8	128.3	19.2	 16
680	  8	152.5	25.6	 16
681	  8	142.8	18.1	 16
682	  8	155.0	23.2	 16
683	  8	342.3	32.6	 16
684	  8	180.0	31.9	 16
685	  8	171.0	23.8	 16
686	  8	272.0	33.9	 16
687	  8	608.5	46.2	 16
688	  8	158.3	25.8	 16
689	  8	103.0	12.8	 16
690	  8	176.3	24.7	 16
691	  8	171.5	22.3	 16
692	  8	227.3	33.1	 16
693	  8	109.0	19.4	 16
694	  8	82.5	12.6	 16
695	  8	87.0	12.0	 16
696	  8	81.5	16.8	 16
697	  8	86.3	16.4	 16
698	  8	83.8	13.0	 16
699	  8	97.5	16.9	 16
700	  8	106.8	27.9	 16
701	  8	98.5	11.5	 16
702	  8	140.5	14.3	 16
703	  8	111.3	17.3	 16
704	  8	109.8	18.9	 16
705	  8	104.3	13.9	 16
706	  8	220.5	22.1	 16
707	  8	171.3	19.7	 16
708	  8	125.3	17.4	 16
709	  8	159.3	25.7	 16
710	  8	90.3	10.4	 16
711	  8	7737.0	779.6	 16
  0	  9	158.8	21.2	 16
  1	  9	201.0	26.3	 16
  2	  9	170.0	20.9	 16
  3	  9	116.8	15.7	 16
  4	  9	106.5	13.9	 16
  5	  9	113.0	13.2	 16
  6	  9	414.8	74.8	 16
  7	  9	115.3	13.6	 16
  8	  9	125.5	15.0	 16
  9	  9	118.3	10.8	 16
 10	  9	214.3	24.2	 16
 11	  9	99.3	15.9	 16
 12	  9	7006.3	389.0	 16
 13	  9	177.3	25.4	 16
 14	  9	177.5	18.7	 16
 15	  9	178.5	20.1	 16
 16	  9	8860.5	531.9	 16
 17	  9	131.0	19.6	 16
 18	  9	8657.0	274.3	 16
 19	  9	7865.8	650.0	 16
 20	  9	7966.8	610.6	 16
 21	  9	7821.3	721.3	 16
 22	  9	234.3	22.4	 16
 23	  9	131.0	19.7	 16
 24	  9	7578.8	608.8	 16
 25	  9	204.3	29.8	 16
 26	  9	173.0	24.7	 16
 27	  9	174.8	28.3	 16
 28	  9	8869.0	513.2	 16
 29	  9	138.8	19.2	 16
 30	  9	8489.0	306.2	 16
 31	  9	7696.5	568.3	 16
 32	  9	7768.3	589.7	 16
 33	  9	7643.5	790.7	 16
 34	  9	183.5	20.4	 16
 35	  9	106.3	11.5	 16
 36	  9	6579.0	516.4	 16
 37	  9	168.8	22.6	 16
 38	  9	180.0	21.5	 16
 39	  9	166.0	18.8	 16
 40	  9	184.3	26.4	 16
 41	  9	110.8	17.4	 16
 42	  9	7135.0	578.5	 16
 43	  9	191.3	20.4	 16
 44	  9	173.3	16.9	 16
 45	  9	182.5	20.4	 16
 46	  9	7348.3	415.7	 16
 47	  9	116.5	15.7	 16
 48	  9	177.5	27.3	 16
 49	  9	170.8	18.4	 16
 50	  9	5889.5	601.3	 16
 51	  9	186.8	29.7	 16
 52	  9	186.3	27.6	 16
 53	  9	109.5	12.0	 16
 54	  9	8073.3	328.9	 16
 55	  9	6846.8	621.8	 16
 56	  9	6429.0	728.3	 16
 57	  9	169.8	26.4	 16
 58	  9	169.3	22.6	 16
 59	  9	82.0	15.8	 16
 60	  9	99.3	11.5	 16
 61	  9	109.0	13.7	 16
 62	  9	7112.3	382.8	 16
 63	  9	206.3	27.1	 16
 64	  9	176.3	21.6	 16
 65	  9	188.5	23.8	 16
 66	  9	8577.0	501.4	 16
 67	  9	148.0	22.4	 16
 68	  9	6900.3	443.8	 16
 69	  9	235.3	37.2	 16
 70	  9	167.3	21.5	 16
 71	  9	157.0	17.6	 16
 72	  9	7243.3	426.0	 16
 73	  9	124.5	24.6	 16
 74	  9	161.3	19.5	 16
 75	  9	160.8	24.5	 16
 76	  9	158.3	17.0	 16
 77	  9	174.0	24.8	 16
 78	  9	163.8	17.2	 16
 79	  9	93.8	11.4	 16
 80	  9	6265.0	509.3	 16
 81	  9	185.5	27.5	 16
 82	  9	168.3	24.5	 16
 83	  9	173.3	24.2	 16
 84	  9	7049.5	812.8	 16
 85	  9	125.0	21.2	 16
 86	  9	151.3	17.4	 16
 87	  9	163.3	20.1	 16
 88	  9	14658.8	13569.8	 16
 89	  9	211.5	35.9	 16
 90	  9	173.3	20.4	 16
 91	  9	103.5	13.0	 16
 92	  9	161.0	17.5	 16
 93	  9	171.0	22.5	 16
 94	  9	169.5	17.9	 16
 95	  9	6446.8	1049.2	 16
 96	  9	201.5	28.2	 16
 97	  9	100.0	12.7	 16
 98	  9	165.8	23.9	 16
 99	  9	158.5	18.4	 16
100	  9	175.5	23.5	 16
101	  9	6516.5	1207.1	 16
102	  9	174.3	25.3	 16
103	  9	95.0	14.9	 16
104	  9	6367.0	1195.2	 16
105	  9	179.5	27.2	 16
106	  9	175.5	24.4	 16
107	  9	174.5	28.1	 16
108	  9	7659.5	1274.6	 16
109	  9	113.3	29.8	 20
110	  9	95.0	17.2	 16
111	  9	310.8	30.0	 16
112	  9	779.3	62.8	 16
113	  9	329.5	32.8	 16
114	  9	235.5	31.8	 16
115	  9	125.3	19.0	 16
116	  9	101.5	17.3	 16
117	  9	105.8	9.5	 16
118	  9	107.5	19.3	 16
119	  9	119.8	17.3	 16
120	  9	164.3	22.2	 16
121	  9	137.0	25.6	 16
122	  9	117.3	14.7	 16
123	  9	142.8	21.2	 16
124	  9	261.3	46.7	 16
125	  9	103.8	13.1	 16
126	  9	116.3	21.6	 16
127	  9	227.5	39.1	 16
128	  9	107.3	18.5	 16
129	  9	120.5	23.3	 16
130	  9	147.8	18.3	 16
131	  9	198.3	27.1	 16
132	  9	188.5	29.5	 16
133	  9	131.0	20.7	 16
134	  9	408.3	43.4	 16
135	  9	90.3	14.0	 16
136	  9	125.8	18.9	 16
137	  9	108.3	13.8	 16
138	  9	89.0	14.4	 16
139	  9	112.3	18.0	 16
140	  9	101.0	15.6	 16
141	  9	175.3	21.5	 16
142	  9	188.3	30.1	 16
143	  9	375.0	19.6	 16
144	  9	115.3	16.5	 16
145	  9	126.5	16.0	 16
146	  9	159.5	27.6	 16
147	  9	114.3	18.8	 16
148	  9	148.5	21.1	 16
149	  9	118.5	14.6	 16
150	  9	241.8	39.5	 16
151	  9	104.3	13.3	 16
152	  9	4418.3	914.6	 16
153	  9	408.3	85.9	 16
154	  9	262.5	42.6	 16
155	  9	777.8	89.4	 16
156	  9	240.3	35.7	 16
157	  9	499.3	49.5	 16
158	  9	200.3	23.4	 16
159	  9	399.5	59.8	 16
160	  9	784.5	54.5	 16
161	  9	100.8	11.5	 16
162	  9	93.5	9.8	 16
163	  9	164.8	29.4	 16
164	  9	151.8	21.4	 16
165	  9	303.5	24.8	 16
166	  9	147.8	20.6	 16
167	  9	108.0	14.8	 16
168	  9	115.5	19.4	 16
169	  9	544.3	79.0	 16
170	  9	1287.5	172.6	 16
171	  9	99.5	11.1	 16
172	  9	132.5	18.5	 16
173	  9	176.3	20.7	 16
174	  9	234.5	28.1	 16
175	  9	200.5	21.2	 16
176	  9	96.3	11.1	 16
177	  9	103.0	14.4	 16
178	  9	91.3	14.3	 16
179	  9	98.3	14.1	 16
180	  9	101.8	15.7	 16
181	  9	103.8	22.2	 16
182	  9	83.5	13.9	 16
183	  9	94.3	15.5	 16
184	  9	91.3	14.8	 16
185	  9	100.3	13.9	 16
186	  9	92.3	11.5	 16
187	  9	96.8	10.2	 16
188	  9	87.0	14.9	 16
189	  9	92.5	10.6	 16
190	  9	100.0	11.8	 16
191	  9	294.5	49.0	 16
192	  9	236.5	21.1	 16
193	  9	143.5	24.9	 16
194	  9	100.0	13.6	 16
195	  9	196.3	25.6	 16
196	  9	99.3	18.4	 16
197	  9	101.8	15.8	 16
198	  9	159.3	18.6	 16
199	  9	134.3	13.1	 16
200	  9	102.3	14.0	 16
201	  9	982.8	171.0	 16
202	  9	106.0	16.8	 16
203	  9	104.0	13.6	 16
204	  9	123.8	19.2	 16
205	  9	235.0	21.9	 16
206	  9	269.3	33.8	 16
207	  9	115.3	15.1	 16
208	  9	157.5	21.3	 16
209	  9	85.3	12.5	 16
210	  9	250.8	32.7	 16
211	  9	142.0	21.3	 16
212	  9	387.3	46.2	 16
213	  9	184.0	21.2	 16
214	  9	178.3	21.0	 16
215	  9	141.3	16.9	 16
216	  9	143.8	21.0	 16
217	  9	105.3	16.6	 16
218	  9	101.3	15.1	 16
219	  9	91.5	19.0	 16
220	  9	197.8	33.0	 16
221	  9	153.8	22.8	 16
222	  9	126.8	14.8	 16
223	  9	187.5	25.5	 16
224	  9	131.5	17.0	 16
225	  9	179.3	21.7	 16
226	  9	98.5	15.0	 16
227	  9	136.5	28.1	 16
228	  9	88.3	13.6	 16
229	  9	185.8	22.7	 16
230	  9	127.3	14.8	 16
231	  9	482.8	56.2	 16
232	  9	175.5	24.3	 16
233	  9	459.0	49.8	 16
234	  9	114.0	12.6	 16
235	  9	283.5	32.0	 16
236	  9	186.5	26.8	 16
237	  9	201.5	32.1	 16
238	  9	539.3	52.3	 16
239	  9	165.5	20.6	 16
240	  9	263.3	51.7	 16
241	  9	139.3	15.3	 16
242	  9	92.8	13.8	 16
243	  9	104.3	15.5	 16
244	  9	107.3	17.1	 16
245	  9	144.0	19.5	 16
246	  9	79.0	15.6	 16
247	  9	3154.3	859.0	 16
248	  9	112.5	24.1	 16
249	  9	144.8	19.1	 16
250	  9	155.3	21.2	 16
251	  9	178.0	22.8	 20
252	  9	261.8	42.9	 16
253	  9	241.5	26.7	 16
254	  9	121.8	23.4	 16
255	  9	84.0	11.1	 16
256	  9	126.0	16.2	 16
257	  9	153.5	19.9	 16
258	  9	794.5	94.3	 16
259	  9	161.5	18.3	 16
260	  9	175.0	28.6	 16
261	  9	187.3	21.1	 16
262	  9	211.3	38.3	 16
263	  9	99.0	16.4	 16
264	  9	109.0	16.6	 16
265	  9	86.0	15.3	 16
266	  9	239.5	33.7	 16
267	  9	227.3	34.7	 16
268	  9	113.0	15.6	 16
269	  9	326.0	60.0	 16
270	  9	86.5	16.7	 16
271	  9	95.3	18.4	 16
272	  9	94.3	10.5	 16
273	  9	97.0	15.1	 16
274	  9	127.3	15.0	 16
275	  9	113.3	23.3	 16
276	  9	82.8	14.0	 16
277	  9	91.3	12.8	 16
278	  9	157.3	32.9	 16
279	  9	193.5	26.0	 16
280	  9	133.3	17.8	 16
281	  9	121.5	17.0	 16
282	  9	179.8	19.2	 16
283	  9	91.0	12.5	 16
284	  9	100.5	9.5	 16
285	  9	134.3	18.3	 16
286	  9	79.3	8.7	 16
287	  9	86.8	16.4	 16
288	  9	115.5	20.0	 16
289	  9	199.5	25.3	 16
290	  9	213.8	34.1	 16
291	  9	206.3	22.9	 16
292	  9	323.5	56.5	 16
293	  9	151.3	29.0	 16
294	  9	1116.0	236.1	 16
295	  9	400.8	49.6	 16
296	  9	172.3	27.7	 16
297	  9	298.0	26.5	 16
298	  9	146.3	21.6	 16
299	  9	143.8	17.0	 16
300	  9	147.3	22.6	 16
301	  9	167.0	23.9	 16
302	  9	98.0	20.9	 16
303	  9	99.8	19.0	 16
304	  9	136.0	18.3	 16
305	  9	461.5	27.5	 16
306	  9	147.3	15.1	 16
307	  9	160.5	17.7	 16
308	  9	327.0	46.4	 16
309	  9	154.8	19.6	 16
310	  9	329.5	43.2	 16
311	  9	469.8	65.2	 16
312	  9	118.3	20.5	 16
313	  9	270.0	57.4	 16
314	  9	168.5	23.4	 16
315	  9	116.8	21.2	 16
316	  9	220.8	19.8	 16
317	  9	322.8	53.6	 16
318	  9	87.5	14.0	 16
319	  9	87.3	12.5	 16
320	  9	172.0	21.6	 16
321	  9	130.3	19.4	 16
322	  9	234.3	33.7	 16
323	  9	93.5	16.6	 16
324	  9	90.5	14.1	 16
325	  9	88.0	14.3	 16
326	  9	76.3	13.5	 16
327	  9	84.0	14.0	 16
328	  9	381.8	51.2	 16
329	  9	184.5	28.1	 16
330	  9	167.3	20.4	 16
331	  9	140.8	17.7	 16
332	  9	433.3	46.3	 16
333	  9	303.5	31.2	 16
334	  9	157.8	22.5	 16
335	  9	98.3	12.5	 16
336	  9	82.3	17.2	 16
337	  9	94.8	15.5	 16
338	  9	123.3	17.9	 16
339	  9	174.5	19.4	 16
340	  9	129.3	21.2	 16
341	  9	100.3	12.2	 16
342	  9	161.5	18.8	 16
343	  9	152.5	25.1	 16
344	  9	599.0	60.4	 16
345	  9	75.3	9.1	 16
346	  9	720.0	83.6	 16
347	  9	152.3	21.2	 16
348	  9	1301.8	111.9	 16
349	  9	135.8	21.1	 16
350	  9	887.3	142.4	 16
351	  9	160.0	19.9	 16
352	  9	188.8	23.8	 16
353	  9	177.0	27.0	 16
354	  9	141.0	21.6	 16
355	  9	205.5	39.0	 16
356	  9	408.3	70.1	 16
357	  9	155.0	18.9	 16
358	  9	179.3	24.8	 16
359	  9	121.3	16.2	 16
360	  9	93.8	16.3	 16
361	  9	171.0	28.1	 16
362	  9	100.8	17.9	 16
363	  9	231.3	42.8	 16
364	  9	101.5	17.2	 16
365	  9	79.8	8.7	 16
366	  9	76.5	10.1	 16
367	  9	87.3	9.9	 16
368	  9	115.5	22.1	 16
369	  9	121.3	16.9	 16
370	  9	195.5	33.4	 16
371	  9	164.3	22.0	 16
372	  9	133.3	21.5	 16
373	  9	73.8	11.4	 16
374	  9	98.8	16.0	 16
375	  9	97.8	11.4	 16
376	  9	164.3	23.2	 16
377	  9	464.5	52.8	 16
378	  9	2921.3	529.5	 16
379	  9	121.0	14.4	 16
380	  9	93.3	14.0	 16
381	  9	98.3	14.2	 16
382	  9	151.8	25.1	 16
383	  9	398.3	45.1	 16
384	  9	383.3	32.2	 16
385	  9	322.5	61.3	 16
386	  9	153.3	21.1	 16
387	  9	396.8	44.6	 16
388	  9	218.3	37.2	 16
389	  9	96.5	16.1	 16
390	  9	113.0	11.7	 16
391	  9	169.5	29.9	 16
392	  9	122.0	12.9	 16
393	  9	78.5	11.1	 16
394	  9	1420.0	250.3	 20
395	  9	116.0	16.2	 16
396	  9	89.3	19.3	 16
397	  9	82.5	14.6	 16
398	  9	134.8	17.7	 16
399	  9	103.3	14.3	 16
400	  9	79.5	8.6	 16
401	  9	81.3	8.9	 16
402	  9	86.3	14.3	 16
403	  9	114.3	21.3	 16
404	  9	129.0	17.2	 16
405	  9	132.5	16.0	 16
406	  9	103.5	14.6	 16
407	  9	139.0	25.2	 16
408	  9	96.3	13.8	 16
409	  9	141.5	18.3	 16
410	  9	78.5	13.7	 16
411	  9	188.3	19.9	 16
412	  9	140.8	20.3	 16
413	  9	147.0	22.3	 16
414	  9	143.3	17.6	 16
415	  9	219.5	28.1	 16
416	  9	119.0	22.0	 16
417	  9	94.0	11.4	 16
418	  9	73.0	15.8	 16
419	  9	223.8	32.6	 16
420	  9	351.0	46.5	 16
421	  9	101.8	11.5	 16
422	  9	72.3	11.9	 16
423	  9	479.3	80.4	 16
424	  9	175.8	22.2	 16
425	  9	91.5	16.2	 16
426	  9	79.3	14.9	 16
427	  9	186.0	28.8	 16
428	  9	109.3	17.8	 16
429	  9	79.3	12.3	 16
430	  9	86.3	15.7	 16
431	  9	81.5	14.4	 16
432	  9	84.3	12.2	 16
433	  9	416.0	89.0	 16
434	  9	85.8	8.8	 16
435	  9	82.0	13.1	 16
436	  9	83.3	22.2	 16
437	  9	81.5	15.3	 16
438	  9	765.3	221.3	 16
439	  9	111.5	20.4	 16
440	  9	147.3	15.8	 16
441	  9	174.3	20.7	 16
442	  9	772.5	62.6	 16
443	  9	274.8	26.0	 16
444	  9	278.8	30.0	 16
445	  9	90.8	17.5	 16
446	  9	137.5	22.3	 16
447	  9	80.3	9.3	 16
448	  9	92.5	18.9	 16
449	  9	85.8	11.6	 16
450	  9	140.3	14.3	 16
451	  9	257.8	48.7	 16
452	  9	99.3	12.8	 16
453	  9	151.0	21.9	 16
454	  9	928.5	91.9	 16
455	  9	163.0	22.4	 16
456	  9	117.0	15.5	 16
457	  9	106.5	21.2	 16
458	  9	85.8	11.3	 16
459	  9	105.3	16.5	 16
460	  9	359.0	62.0	 16
461	  9	80.3	16.4	 16
462	  9	81.8	13.6	 16
463	  9	149.5	30.1	 16
464	  9	94.0	14.2	 16
465	  9	154.5	25.0	 16
466	  9	212.3	28.7	 16
467	  9	85.5	18.1	 16
468	  9	90.3	15.3	 16
469	  9	100.0	18.9	 16
470	  9	102.3	12.6	 16
471	  9	93.5	16.1	 16
472	  9	138.8	17.0	 16
473	  9	134.0	17.2	 16
474	  9	227.0	36.4	 16
475	  9	87.3	10.5	 16
476	  9	72.3	9.6	 16
477	  9	80.3	9.3	 16
478	  9	145.0	22.3	 16
479	  9	81.5	13.4	 16
480	  9	132.3	19.8	 16
481	  9	94.8	16.3	 16
482	  9	78.5	14.8	 16
483	  9	79.8	14.0	 16
484	  9	298.0	48.8	 16
485	  9	110.8	17.6	 16
486	  9	713.0	180.1	 16
487	  9	180.0	23.7	 16
488	  9	174.8	24.4	 16
489	  9	77.8	12.2	 16
490	  9	114.5	21.9	 16
491	  9	94.8	16.9	 16
492	  9	209.3	32.7	 16
493	  9	353.8	36.4	 16
494	  9	543.8	34.2	 16
495	  9	257.8	14.2	 16
496	  9	177.5	22.5	 16
497	  9	848.3	80.8	 16
498	  9	266.3	26.5	 16
499	  9	161.0	24.3	 16
500	  9	128.8	20.4	 16
501	  9	93.3	12.0	 16
502	  9	108.3	17.6	 16
503	  9	182.5	35.6	 16
504	  9	143.8	20.1	 16
505	  9	402.8	85.7	 16
506	  9	586.3	110.3	 16
507	  9	176.8	27.8	 16
508	  9	802.3	173.7	 16
509	  9	78.3	10.7	 16
510	  9	264.3	31.1	 16
511	  9	113.0	20.4	 16
512	  9	62.0	9.9	 16
513	  9	127.8	21.1	 16
514	  9	252.0	33.2	 16
515	  9	70.3	11.3	 16
516	  9	99.0	18.8	 16
517	  9	76.0	10.2	 16
518	  9	70.0	11.3	 16
519	  9	150.5	19.9	 16
520	  9	125.0	8.5	 16
521	  9	72.0	11.8	 16
522	  9	102.8	9.6	 16
523	  9	75.8	10.5	 16
524	  9	73.5	9.5	 16
525	  9	111.0	15.1	 16
526	  9	152.8	26.3	 16
527	  9	154.8	26.2	 16
528	  9	112.3	17.0	 16
529	  9	110.5	15.4	 16
530	  9	172.0	27.6	 16
531	  9	94.3	12.8	 16
532	  9	80.3	13.9	 16
533	  9	81.0	9.5	 16
534	  9	85.5	11.3	 16
535	  9	103.5	15.8	 16
536	  9	107.3	11.8	 20
537	  9	124.3	14.5	 16
538	  9	110.3	12.0	 16
539	  9	130.8	18.0	 16
540	  9	236.8	26.5	 16
541	  9	113.0	18.3	 16
542	  9	76.5	10.4	 16
543	  9	104.5	9.1	 16
544	  9	101.0	13.0	 16
545	  9	287.8	39.8	 16
546	  9	141.3	19.1	 16
547	  9	156.3	13.2	 16
548	  9	157.3	20.3	 16
549	  9	136.3	17.5	 16
550	  9	134.5	22.3	 16
551	  9	245.5	31.8	 16
552	  9	201.3	24.4	 16
553	  9	167.8	26.5	 16
554	  9	122.5	15.1	 16
555	  9	68.5	8.0	 16
556	  9	102.3	15.8	 16
557	  9	107.5	18.6	 16
558	  9	91.8	11.5	 16
559	  9	112.0	16.2	 16
560	  9	82.3	20.4	 16
561	  9	343.3	36.0	 16
562	  9	84.3	11.1	 16
563	  9	135.0	11.1	 16
564	  9	217.5	33.4	 16
565	  9	306.3	54.5	 16
566	  9	643.5	96.0	 16
567	  9	89.8	16.2	 16
568	  9	77.3	11.9	 16
569	  9	95.3	13.1	 16
570	  9	287.3	30.8	 16
571	  9	491.3	83.5	 16
572	  9	295.3	32.0	 16
573	  9	121.0	17.7	 16
574	  9	234.3	28.9	 16
575	  9	238.3	31.2	 16
576	  9	220.3	43.7	 16
577	  9	141.5	23.3	 16
578	  9	86.5	14.6	 16
579	  9	90.0	14.5	 16
580	  9	134.5	19.1	 16
581	  9	303.5	44.2	 16
582	  9	269.0	25.1	 16
583	  9	124.5	12.7	 16
584	  9	116.0	20.3	 16
585	  9	171.3	21.0	 16
586	  9	169.8	28.3	 16
587	  9	65.3	7.8	 16
588	  9	112.0	14.2	 16
589	  9	139.8	24.9	 16
590	  9	128.8	23.3	 16
591	  9	203.3	33.4	 16
592	  9	76.8	11.3	 16
593	  9	126.5	15.9	 16
594	  9	122.0	18.4	 16
595	  9	150.0	17.7	 16
596	  9	792.3	143.1	 16
597	  9	873.5	149.0	 16
598	  9	335.0	66.7	 16
599	  9	141.0	18.5	 16
600	  9	155.3	25.7	 16
601	  9	158.0	20.4	 16
602	  9	105.8	12.7	 16
603	  9	261.8	60.1	 16
604	  9	114.3	21.9	 16
605	  9	89.8	19.7	 16
606	  9	206.0	25.8	 16
607	  9	91.8	15.5	 16
608	  9	84.0	13.3	 16
609	  9	98.5	12.0	 16
610	  9	115.8	10.6	 16
611	  9	102.8	18.6	 16
612	  9	126.5	28.7	 16
613	  9	1107.3	156.6	 16
614	  9	121.3	26.0	 16
615	  9	116.3	18.6	 16
616	  9	135.5	25.5	 16
617	  9	414.5	65.7	 16
618	  9	273.8	37.4	 16
619	  9	89.5	12.3	 16
620	  9	130.8	21.2	 16
621	  9	112.8	17.2	 16
622	  9	85.5	15.9	 16
623	  9	160.5	22.6	 16
624	  9	178.3	40.4	 16
625	  9	111.3	17.8	 16
626	  9	76.3	11.7	 16
627	  9	144.8	24.9	 16
628	  9	150.3	23.7	 16
629	  9	210.0	24.9	 16
630	  9	394.0	28.5	 16
631	  9	331.8	33.0	 16
632	  9	607.0	61.5	 16
633	  9	108.8	20.1	 16
634	  9	429.8	32.4	 16
635	  9	990.3	138.8	 16
636	  9	242.0	39.9	 16
637	  9	98.5	14.0	 16
638	  9	78.3	12.7	 16
639	  9	74.3	16.5	 16
640	  9	84.3	10.5	 16
641	  9	635.5	74.0	 16
642	  9	85.5	11.8	 16
643	  9	105.3	13.8	 16
644	  9	137.0	19.9	 16
645	  9	73.5	13.5	 16
646	  9	147.0	24.2	 16
647	  9	109.5	13.5	 16
648	  9	500.0	78.6	 16
649	  9	103.8	12.7	 16
650	  9	82.5	16.1	 16
651	  9	87.5	14.1	 16
652	  9	139.8	36.6	 16
653	  9	375.3	52.3	 16
654	  9	161.3	17.2	 16
655	  9	157.5	20.7	 16
656	  9	86.3	13.7	 16
657	  9	175.5	38.9	 16
658	  9	128.3	14.6	 16
659	  9	169.0	30.4	 16
660	  9	115.0	20.4	 16
661	  9	115.5	16.3	 16
662	  9	87.0	12.8	 16
663	  9	197.5	29.2	 16
664	  9	127.8	22.6	 16
665	  9	132.3	14.8	 16
666	  9	122.5	20.7	 16
667	  9	261.3	39.9	 16
668	  9	260.0	35.3	 16
669	  9	200.8	28.7	 16
670	  9	136.5	20.3	 16
671	  9	205.5	27.2	 16
672	  9	247.3	46.0	 16
673	  9	133.5	14.2	 16
674	  9	139.3	17.3	 16
675	  9	92.5	15.3	 16
676	  9	102.5	16.8	 16
677	  9	170.0	25.4	 16
678	  9	107.5	11.3	 20
679	  9	111.3	17.0	 16
680	  9	297.8	39.2	 16
681	  9	3620.3	384.3	 16
682	  9	3789.8	324.3	 16
683	  9	3612.0	331.7	 16
684	  9	3141.8	431.5	 16
685	  9	218.8	25.2	 16
686	  9	137.5	25.1	 16
687	  9	85.3	10.1	 16
688	  9	69.8	13.2	 16
689	  9	97.5	16.6	 16
690	  9	97.3	40.5	 16
691	  9	193.0	14.1	 16
692	  9	96.3	12.5	 16
693	  9	164.3	21.3	 16
694	  9	122.0	18.4	 16
695	  9	95.3	17.4	 16
696	  9	101.8	23.9	 16
697	  9	216.8	35.5	 16
698	  9	474.0	79.7	 16
699	  9	168.0	24.1	 16
700	  9	220.3	30.4	 16
701	  9	117.5	17.6	 16
702	  9	101.5	15.0	 16
703	  9	81.8	8.4	 16
704	  9	89.3	12.8	 16
705	  9	176.3	26.1	 16
706	  9	133.0	20.1	 16
707	  9	165.0	21.8	 16
708	  9	380.3	40.2	 16
709	  9	419.0	46.9	 16
710	  9	521.3	33.0	 16
711	  9	140.3	14.4	 16
  0	 10	4734.0	485.6	 16
  1	 10	121.3	21.7	 16
  2	 10	150.8	19.6	 16
  3	 10	99.3	15.6	 16
  4	 10	108.0	14.3	 16
  5	 10	104.8	10.1	 16
  6	 10	118.3	13.3	 16
  7	 10	111.0	14.6	 16
  8	 10	111.0	11.9	 16
  9	 10	172.0	71.7	 16
 10	 10	189.0	25.3	 16
 11	 10	95.0	11.2	 16
 12	 10	6793.8	787.9	 16
 13	 10	178.3	21.7	 16
 14	 10	171.8	14.9	 16
 15	 10	172.8	20.3	 16
 16	 10	8430.5	822.5	 16
 17	 10	114.5	14.0	 16
 18	 10	8034.3	760.9	 16
 19	 10	170.3	22.2	 16
 20	 10	197.5	25.9	 16
 21	 10	224.0	27.6	 16
 22	 10	233.3	19.8	 16
 23	 10	140.5	15.1	 16
 24	 10	6976.5	510.2	 16
 25	 10	169.8	21.6	 16
 26	 10	181.8	22.7	 16
 27	 10	178.3	30.7	 16
 28	 10	9021.8	505.5	 16
 29	 10	135.3	27.8	 16
 30	 10	8017.3	599.6	 16
 31	 10	189.5	26.2	 16
 32	 10	170.3	15.7	 16
 33	 10	166.3	22.8	 16
 34	 10	175.3	27.3	 16
 35	 10	97.0	11.8	 16
 36	 10	6743.8	723.0	 16
 37	 10	168.5	23.4	 16
 38	 10	169.3	14.9	 16
 39	 10	163.5	14.3	 16
 40	 10	7761.0	590.6	 16
 41	 10	120.8	21.2	 16
 42	 10	6737.3	485.9	 16
 43	 10	180.8	26.2	 16
 44	 10	175.5	22.8	 16
 45	 10	165.8	24.2	 16
 46	 10	7510.8	396.9	 16
 47	 10	118.5	19.7	 16
 48	 10	162.3	23.7	 16
 49	 10	171.0	19.0	 16
 50	 10	6431.0	394.5	 16
 51	 10	165.0	17.6	 16
 52	 10	161.3	20.1	 16
 53	 10	92.3	10.5	 16
 54	 10	7203.0	495.4	 16
 55	 10	194.3	21.1	 16
 56	 10	163.5	21.7	 16
 57	 10	155.8	20.2	 16
 58	 10	168.5	17.5	 16
 59	 10	82.3	13.6	 16
 60	 10	77.5	12.6	 16
 61	 10	89.5	14.7	 16
 62	 10	6677.5	369.6	 16
 63	 10	161.5	15.9	 16
 64	 10	177.8	27.8	 16
 65	 10	154.5	20.5	 16
 66	 10	8208.0	514.4	 16
 67	 10	129.3	18.8	 16
 68	 10	6617.8	359.2	 16
 69	 10	177.3	18.4	 16
 70	 10	155.5	14.9	 16
 71	 10	163.3	20.5	 16
 72	 10	6972.3	446.3	 16
 73	 10	113.5	17.6	 16
 74	 10	151.0	18.6	 16
 75	 10	150.8	14.6	 16
 76	 10	153.3	19.0	 16
 77	 10	157.3	18.5	 16
 78	 10	179.0	15.8	 16
 79	 10	101.5	15.9	 16
 80	 10	6326.8	443.1	 16
 81	 10	167.5	24.5	 16
 82	 10	155.5	25.3	 16
 83	 10	173.0	20.5	 16
 84	 10	7119.8	873.8	 16
 85	 10	115.3	20.2	 16
 86	 10	166.3	21.6	 16
 87	 10	168.0	20.9	 16
 88	 10	6425.8	829.8	 16
 89	 10	200.0	38.4	 16
 90	 10	182.3	25.0	 16
 91	 10	100.3	15.0	 16
 92	 10	6351.8	824.3	 16
 93	 10	183.0	28.9	 16
 94	 10	166.5	22.6	 16
 95	 10	6502.3	889.9	 16
 96	 10	188.5	25.8	 16
 97	 10	104.3	15.3	 16
 98	 10	6178.0	981.3	 16
 99	 10	200.8	36.0	 16
100	 10	167.0	18.7	 16
101	 10	6533.8	975.3	 16
102	 10	184.0	21.8	 16
103	 10	92.3	12.5	 16
104	 10	6195.0	905.2	 16
105	 10	189.5	29.8	 16
106	 10	162.5	20.0	 16
107	 10	157.3	14.9	 16
108	 10	7962.5	1281.3	 16
109	 10	111.3	25.4	 16
110	 10	78.0	11.1	 16
111	 10	193.0	26.4	 16
112	 10	351.5	29.3	 16
113	 10	180.3	19.1	 20
114	 10	275.5	42.7	 16
115	 10	110.8	16.5	 16
116	 10	97.5	15.6	 16
117	 10	101.5	16.5	 16
118	 10	110.3	26.9	 16
119	 10	110.0	12.2	 16
120	 10	96.3	12.9	 16
121	 10	116.3	13.4	 16
122	 10	102.0	12.2	 16
123	 10	155.5	18.2	 16
124	 10	147.8	20.3	 16
125	 10	122.5	15.4	 16
126	 10	107.0	14.7	 16
127	 10	100.0	14.4	 16
128	 10	96.5	15.1	 16
129	 10	110.8	17.1	 16
130	 10	141.3	16.3	 16
131	 10	165.5	21.5	 16
132	 10	114.0	17.3	 16
133	 10	105.3	16.6	 16
134	 10	103.3	18.6	 16
135	 10	88.0	13.4	 16
136	 10	85.0	11.4	 16
137	 10	103.0	15.7	 16
138	 10	83.0	13.0	 16
139	 10	112.5	16.2	 16
140	 10	111.0	21.6	 16
141	 10	104.8	12.9	 16
142	 10	141.3	15.1	 16
143	 10	206.5	29.8	 16
144	 10	158.0	20.4	 16
145	 10	108.8	18.1	 16
146	 10	124.0	12.0	 16
147	 10	107.5	16.7	 16
148	 10	118.3	19.6	 16
149	 10	106.3	15.2	 16
150	 10	144.0	16.0	 16
151	 10	89.5	15.8	 16
152	 10	1063.8	184.3	 16
153	 10	109.3	18.4	 16
154	 10	262.5	29.8	 16
155	 10	258.5	29.2	 16
156	 10	101.5	15.5	 16
157	 10	307.8	41.5	 16
158	 10	204.0	25.2	 16
159	 10	334.0	34.7	 16
160	 10	810.8	64.4	 16
161	 10	95.0	14.8	 16
162	 10	94.8	19.7	 16
163	 10	144.0	21.0	 16
164	 10	158.5	19.9	 16
165	 10	224.3	24.0	 16
166	 10	128.3	21.0	 16
167	 10	116.0	19.7	 16
168	 10	136.5	20.2	 16
169	 10	578.8	47.4	 16
170	 10	414.0	76.3	 16
171	 10	107.3	20.3	 16
172	 10	124.3	20.2	 16
173	 10	103.8	15.7	 16
174	 10	115.3	12.8	 16
175	 10	182.3	27.2	 16
176	 10	112.5	17.3	 16
177	 10	109.5	16.6	 16
178	 10	96.0	14.5	 16
179	 10	95.3	13.6	 16
180	 10	89.0	11.4	 16
181	 10	106.5	13.2	 16
182	 10	97.8	13.7	 16
183	 10	102.5	13.6	 16
184	 10	93.0	14.0	 16
185	 10	95.5	13.0	 16
186	 10	99.5	12.5	 16
187	 10	95.0	16.2	 16
188	 10	103.5	17.7	 16
189	 10	95.5	13.1	 16
190	 10	98.5	14.2	 16
191	 10	212.3	35.5	 16
192	 10	126.3	19.9	 16
193	 10	107.3	10.3	 16
194	 10	104.0	22.8	 16
195	 10	102.3	16.1	 16
196	 10	107.3	12.7	 16
197	 10	94.8	13.6	 16
198	 10	107.3	15.1	 16
199	 10	157.3	19.7	 16
200	 10	119.0	20.0	 16
201	 10	328.8	56.0	 16
202	 10	102.8	15.3	 16
203	 10	93.3	10.7	 16
204	 10	105.0	17.7	 16
205	 10	159.8	17.6	 16
206	 10	180.3	20.1	 16
207	 10	97.8	13.0	 16
208	 10	157.3	22.6	 16
209	 10	90.0	9.3	 16
210	 10	206.3	25.8	 16
211	 10	129.8	25.5	 16
212	 10	292.0	31.2	 16
213	 10	178.5	19.4	 16
214	 10	201.3	24.8	 16
215	 10	159.0	17.2	 16
216	 10	115.5	9.5	 16
217	 10	104.0	21.0	 16
218	 10	98.3	14.4	 16
219	 10	95.5	18.3	 16
220	 10	174.3	29.7	 16
221	 10	188.3	19.4	 16
222	 10	135.8	17.6	 16
223	 10	153.5	16.7	 16
224	 10	158.0	15.4	 16
225	 10	123.8	21.1	 16
226	 10	99.8	19.5	 16
227	 10	93.5	10.2	 16
228	 10	97.0	11.9	 16
229	 10	158.3	16.5	 16
230	 10	121.3	16.2	 16
231	 10	176.5	22.1	 16
232	 10	193.5	21.8	 16
233	 10	221.0	26.3	 16
234	 10	110.0	18.4	 16
235	 10	164.0	21.7	 16
236	 10	132.0	17.1	 16
237	 10	113.8	18.1	 16
238	 10	135.5	18.9	 16
239	 10	177.3	24.0	 16
240	 10	146.5	19.7	 16
241	 10	148.0	21.0	 16
242	 10	104.5	16.6	 16
243	 10	110.8	16.5	 16
244	 10	109.8	18.8	 16
245	 10	158.0	16.0	 16
246	 10	84.5	17.9	 16
247	 10	462.0	174.4	 16
248	 10	99.3	16.4	 16
249	 10	118.8	12.4	 16
250	 10	132.3	18.0	 16
251	 10	143.5	29.3	 16
252	 10	113.0	13.3	 16
253	 10	220.5	23.7	 16
254	 10	143.3	30.6	 16
255	 10	110.0	19.8	 20
256	 10	133.3	16.1	 16
257	 10	164.5	21.0	 16
258	 10	416.0	61.5	 16
259	 10	152.0	17.9	 16
260	 10	182.8	23.2	 16
261	 10	174.0	20.0	 16
262	 10	107.5	13.0	 16
263	 10	102.0	12.2	 16
264	 10	100.5	15.2	 16
265	 10	98.8	15.4	 16
266	 10	159.3	17.1	 16
267	 10	162.5	26.0	 16
268	 10	106.0	15.1	 16
269	 10	225.3	25.9	 16
270	 10	79.3	12.2	 16
271	 10	78.5	11.5	 16
272	 10	88.3	13.1	 16
273	 10	89.3	16.8	 16
274	 10	108.0	13.6	 16
275	 10	85.3	11.9	 16
276	 10	88.3	14.2	 16
277	 10	101.3	18.2	 16
278	 10	125.5	19.6	 16
279	 10	156.8	53.0	 16
280	 10	120.3	21.1	 16
281	 10	118.0	14.3	 16
282	 10	166.3	15.9	 16
283	 10	87.3	11.0	 16
284	 10	93.3	14.6	 16
285	 10	99.3	9.3	 16
286	 10	81.3	10.9	 16
287	 10	91.0	13.9	 16
288	 10	117.5	18.6	 16
289	 10	135.8	21.6	 16
290	 10	183.3	25.7	 16
291	 10	212.3	20.9	 16
292	 10	194.0	22.9	 16
293	 10	114.8	15.0	 16
294	 10	1193.3	94.5	 16
295	 10	521.5	48.4	 16
296	 10	131.0	15.3	 16
297	 10	449.3	43.5	 16
298	 10	194.5	21.0	 16
299	 10	112.3	21.9	 16
300	 10	107.5	17.3	 16
301	 10	144.8	15.9	 16
302	 10	110.8	14.0	 16
303	 10	86.3	11.3	 16
304	 10	153.5	17.8	 16
305	 10	322.3	40.3	 16
306	 10	102.0	13.7	 16
307	 10	168.0	26.9	 16
308	 10	139.8	14.3	 16
309	 10	125.0	18.1	 16
310	 10	170.3	20.2	 16
311	 10	156.3	26.9	 16
312	 10	124.3	24.2	 16
313	 10	129.0	23.8	 16
314	 10	101.8	15.4	 16
315	 10	107.5	11.9	 16
316	 10	196.3	33.0	 16
317	 10	713.0	58.0	 16
318	 10	105.3	17.5	 16
319	 10	93.5	15.8	 16
320	 10	96.8	8.9	 16
321	 10	100.5	17.0	 16
322	 10	246.8	39.8	 16
323	 10	95.5	16.9	 16
324	 10	163.5	21.8	 16
325	 10	88.8	12.7	 16
326	 10	75.3	9.9	 16
327	 10	96.3	16.3	 16
328	 10	196.8	21.9	 16
329	 10	126.3	12.8	 16
330	 10	114.0	17.9	 16
331	 10	123.0	20.4	 16
332	 10	332.3	72.0	 16
333	 10	298.3	46.3	 16
334	 10	170.5	27.7	 16
335	 10	88.3	13.4	 16
336	 10	77.0	12.4	 16
337	 10	101.8	12.0	 16
338	 10	120.5	17.6	 16
339	 10	163.8	16.9	 16
340	 10	143.3	21.0	 16
341	 10	100.8	19.5	 16
342	 10	157.3	22.3	 16
343	 10	116.5	15.0	 16
344	 10	305.3	39.0	 16
345	 10	91.3	15.6	 16
346	 10	238.3	31.2	 16
347	 10	116.3	10.8	 16
348	 10	1174.0	115.0	 16
349	 10	110.5	18.2	 16
350	 10	202.5	30.5	 16
351	 10	123.0	21.6	 16
352	 10	141.0	24.8	 16
353	 10	119.0	19.8	 16
354	 10	96.5	12.5	 16
355	 10	142.3	20.7	 16
356	 10	183.5	22.5	 16
357	 10	106.5	12.9	 16
358	 10	118.8	18.8	 16
359	 10	150.0	24.7	 16
360	 10	85.3	16.4	 16
361	 10	131.0	18.8	 16
362	 10	98.3	13.0	 16
363	 10	149.8	18.8	 16
364	 10	78.3	13.4	 16
365	 10	75.8	10.9	 16
366	 10	75.3	12.7	 16
367	 10	79.8	13.1	 16
368	 10	97.0	13.9	 16
369	 10	113.3	14.6	 16
370	 10	211.8	25.4	 16
371	 10	106.5	16.5	 16
372	 10	93.0	13.3	 16
373	 10	71.5	11.3	 16
374	 10	83.0	12.8	 16
375	 10	100.3	16.4	 16
376	 10	98.8	10.9	 16
377	 10	246.0	29.6	 16
378	 10	363.5	45.4	 16
379	 10	103.5	11.4	 16
380	 10	85.0	14.0	 16
381	 10	70.5	12.9	 16
382	 10	93.0	10.1	 16
383	 10	333.3	29.8	 16
384	 10	192.0	25.9	 16
385	 10	163.5	22.4	 16
386	 10	197.3	28.4	 16
387	 10	188.0	37.2	 16
388	 10	103.3	20.8	 16
389	 10	102.0	25.7	 16
390	 10	126.8	17.7	 16
391	 10	135.8	22.2	 16
392	 10	135.8	22.5	 16
393	 10	74.3	11.8	 16
394	 10	500.3	76.3	 16
395	 10	216.3	34.0	 16
396	 10	88.0	12.1	 16
397	 10	92.5	16.6	 16
398	 10	94.0	14.2	 20
399	 10	103.8	15.6	 16
400	 10	81.0	12.5	 16
401	 10	92.8	11.6	 16
402	 10	91.5	15.0	 16
403	 10	88.0	9.7	 16
404	 10	114.5	11.9	 16
405	 10	148.0	19.0	 16
406	 10	111.0	24.0	 16
407	 10	94.5	16.4	 16
408	 10	100.3	14.7	 16
409	 10	143.5	17.9	 16
410	 10	68.8	10.3	 16
411	 10	284.5	27.5	 16
412	 10	135.0	11.2	 16
413	 10	116.5	13.5	 16
414	 10	181.5	25.7	 16
415	 10	87.8	12.1	 16
416	 10	133.8	17.6	 16
417	 10	90.8	18.9	 16
418	 10	78.3	12.6	 16
419	 10	99.5	17.2	 16
420	 10	171.3	20.1	 16
421	 10	100.0	16.8	 16
422	 10	100.5	92.1	 16
423	 10	89.5	10.9	 16
424	 10	96.3	15.2	 16
425	 10	94.5	12.9	 16
426	 10	79.8	15.2	 16
427	 10	77.5	8.6	 16
428	 10	103.0	17.6	 16
429	 10	76.8	15.2	 16
430	 10	73.0	14.8	 16
431	 10	71.3	13.6	 16
432	 10	71.0	12.4	 16
433	 10	91.3	13.1	 16
434	 10	87.5	15.6	 16
435	 10	77.0	12.7	 16
436	 10	75.3	12.3	 16
437	 10	86.0	15.1	 16
438	 10	425.3	58.2	 16
439	 10	94.0	15.7	 16
440	 10	115.5	17.0	 16
441	 10	120.3	15.8	 16
442	 10	212.3	17.4	 16
443	 10	184.3	17.5	 16
444	 10	105.5	15.2	 16
445	 10	89.5	14.6	 16
446	 10	95.0	15.2	 16
447	 10	94.5	16.1	 16
448	 10	82.5	19.6	 16
449	 10	77.3	14.0	 16
450	 10	106.8	17.1	 16
451	 10	111.5	16.4	 16
452	 10	140.0	21.1	 16
453	 10	122.8	17.8	 16
454	 10	712.0	63.7	 16
455	 10	144.3	22.1	 16
456	 10	112.8	18.7	 16
457	 10	93.3	17.1	 16
458	 10	93.0	13.7	 16
459	 10	96.0	12.6	 16
460	 10	281.5	27.3	 16
461	 10	80.8	14.5	 16
462	 10	82.8	15.9	 16
463	 10	91.3	15.9	 16
464	 10	82.5	16.4	 16
465	 10	100.5	18.1	 16
466	 10	228.5	23.1	 16
467	 10	78.0	12.6	 16
468	 10	81.8	14.4	 16
469	 10	79.3	9.0	 16
470	 10	78.8	12.4	 16
471	 10	86.0	13.8	 16
472	 10	162.0	23.4	 16
473	 10	109.0	22.0	 16
474	 10	92.5	12.2	 16
475	 10	85.3	14.1	 16
476	 10	77.5	14.0	 16
477	 10	78.0	8.0	 16
478	 10	83.5	11.4	 16
479	 10	73.0	10.1	 16
480	 10	87.0	14.6	 16
481	 10	71.5	9.0	 16
482	 10	88.8	14.5	 16
483	 10	69.0	11.7	 16
484	 10	163.0	24.4	 16
485	 10	102.0	13.7	 16
486	 10	214.3	43.1	 16
487	 10	88.5	15.3	 16
488	 10	95.5	15.2	 16
489	 10	74.3	15.8	 16
490	 10	87.8	14.4	 16
491	 10	71.0	9.3	 16
492	 10	97.5	9.4	 16
493	 10	335.3	16.4	 16
494	 10	604.0	36.3	 16
495	 10	302.0	32.3	 16
496	 10	236.8	29.7	 16
497	 10	847.3	54.4	 16
498	 10	327.3	31.2	 16
499	 10	212.0	24.7	 16
500	 10	86.3	9.9	 16
501	 10	98.8	18.0	 16
502	 10	80.0	10.3	 16
503	 10	164.3	28.9	 16
504	 10	124.3	22.2	 16
505	 10	122.3	19.7	 16
506	 10	808.3	55.1	 16
507	 10	104.5	13.4	 16
508	 10	265.3	30.9	 16
509	 10	79.3	8.4	 16
510	 10	129.3	15.7	 16
511	 10	89.3	11.8	 16
512	 10	71.3	12.1	 16
513	 10	88.0	16.3	 16
514	 10	127.3	18.6	 16
515	 10	65.3	10.6	 16
516	 10	76.0	11.4	 16
517	 10	75.0	12.5	 16
518	 10	71.5	17.1	 16
519	 10	89.3	13.5	 16
520	 10	94.0	10.5	 16
521	 10	79.5	12.3	 16
522	 10	124.5	10.7	 16
523	 10	80.8	11.1	 16
524	 10	75.5	13.2	 16
525	 10	156.5	21.9	 16
526	 10	133.5	15.7	 16
527	 10	146.3	19.4	 16
528	 10	110.0	16.3	 16
529	 10	98.5	19.0	 16
530	 10	171.8	26.6	 16
531	 10	92.0	18.3	 16
532	 10	81.5	14.8	 16
533	 10	91.3	12.3	 16
534	 10	84.0	13.1	 16
535	 10	95.5	13.2	 16
536	 10	103.3	14.3	 16
537	 10	92.0	12.8	 16
538	 10	100.3	13.5	 16
539	 10	112.5	17.0	 16
540	 10	97.8	16.1	 20
541	 10	94.5	14.5	 16
542	 10	80.8	14.4	 16
543	 10	91.3	12.0	 16
544	 10	97.8	12.4	 16
545	 10	99.3	15.6	 16
546	 10	205.3	32.8	 16
547	 10	274.5	35.2	 16
548	 10	92.0	15.6	 16
549	 10	119.0	17.9	 16
550	 10	125.8	15.0	 16
551	 10	341.8	28.9	 16
552	 10	229.8	31.1	 16
553	 10	185.5	28.3	 16
554	 10	98.5	17.2	 16
555	 10	74.3	13.4	 16
556	 10	90.3	13.5	 16
557	 10	96.3	10.9	 16
558	 10	86.5	13.0	 16
559	 10	116.8	21.9	 16
560	 10	68.5	9.4	 16
561	 10	217.3	28.0	 16
562	 10	82.5	13.1	 16
563	 10	128.0	14.0	 16
564	 10	146.5	18.0	 16
565	 10	142.0	20.0	 16
566	 10	201.3	33.3	 16
567	 10	83.8	8.8	 16
568	 10	75.0	11.1	 16
569	 10	121.8	18.4	 16
570	 10	219.8	23.3	 16
571	 10	287.5	20.5	 16
572	 10	328.8	38.9	 16
573	 10	97.3	12.8	 16
574	 10	213.8	28.8	 16
575	 10	230.5	21.4	 16
576	 10	234.0	34.1	 16
577	 10	114.0	18.4	 16
578	 10	95.0	13.5	 16
579	 10	87.3	13.1	 16
580	 10	125.3	17.1	 16
581	 10	119.5	15.6	 16
582	 10	179.3	22.2	 16
583	 10	86.0	19.5	 16
584	 10	91.8	12.5	 16
585	 10	110.3	18.5	 16
586	 10	82.3	10.6	 16
587	 10	67.3	14.6	 16
588	 10	106.0	17.9	 16
589	 10	113.3	14.1	 16
590	 10	87.8	12.7	 16
591	 10	106.0	17.3	 16
592	 10	84.3	17.6	 16
593	 10	131.0	18.9	 16
594	 10	103.8	16.7	 16
595	 10	140.8	15.1	 16
596	 10	187.0	32.4	 16
597	 10	176.3	18.8	 16
598	 10	150.0	19.7	 16
599	 10	186.5	25.8	 16
600	 10	157.3	24.4	 16
601	 10	127.0	14.6	 16
602	 10	87.3	12.7	 16
603	 10	112.5	20.1	 16
604	 10	81.3	12.3	 16
605	 10	90.0	12.3	 16
606	 10	195.5	27.8	 16
607	 10	99.5	16.8	 16
608	 10	77.3	11.8	 16
609	 10	81.8	9.5	 16
610	 10	138.3	19.8	 16
611	 10	127.3	15.6	 16
612	 10	86.0	12.6	 16
613	 10	224.5	28.9	 16
614	 10	96.3	19.6	 16
615	 10	93.8	14.6	 16
616	 10	108.5	17.1	 16
617	 10	203.5	19.5	 16
618	 10	273.5	33.0	 16
619	 10	94.3	14.3	 16
620	 10	89.3	12.8	 16
621	 10	104.3	14.8	 16
622	 10	75.0	14.6	 16
623	 10	100.5	17.3	 16
624	 10	77.3	15.6	 16
625	 10	104.0	19.5	 16
626	 10	75.8	13.0	 16
627	 10	80.5	8.0	 16
628	 10	165.5	20.3	 16
629	 10	171.3	20.3	 16
630	 10	255.0	25.5	 16
631	 10	354.5	68.0	 16
632	 10	137.5	22.8	 16
633	 10	94.5	13.5	 16
634	 10	397.0	31.9	 16
635	 10	190.0	22.1	 16
636	 10	132.3	20.1	 16
637	 10	92.3	13.6	 16
638	 10	77.5	11.5	 16
639	 10	67.8	11.3	 16
640	 10	94.8	19.6	 16
641	 10	653.3	81.9	 16
642	 10	81.0	15.8	 16
643	 10	118.3	16.0	 16
644	 10	185.5	28.9	 16
645	 10	78.3	11.8	 16
646	 10	100.5	10.7	 16
647	 10	141.5	20.8	 16
648	 10	216.3	30.5	 16
649	 10	84.3	20.1	 16
650	 10	76.3	16.7	 16
651	 10	75.0	14.0	 16
652	 10	131.0	33.6	 16
653	 10	271.8	48.3	 16
654	 10	137.3	19.0	 16
655	 10	131.0	20.0	 16
656	 10	92.5	13.9	 16
657	 10	84.5	14.1	 16
658	 10	286.0	64.2	 16
659	 10	99.3	14.8	 16
660	 10	98.0	17.5	 16
661	 10	81.3	18.5	 16
662	 10	78.3	11.1	 16
663	 10	184.3	14.1	 16
664	 10	97.5	13.3	 16
665	 10	157.8	18.9	 16
666	 10	92.5	11.3	 16
667	 10	272.3	34.3	 16
668	 10	177.3	28.8	 16
669	 10	187.5	19.3	 16
670	 10	200.5	25.2	 16
671	 10	117.0	12.6	 16
672	 10	208.8	32.0	 16
673	 10	137.5	22.3	 16
674	 10	112.8	17.9	 16
675	 10	94.3	16.4	 16
676	 10	121.5	18.8	 16
677	 10	160.0	20.4	 16
678	 10	101.0	11.5	 16
679	 10	107.8	19.0	 16
680	 10	321.5	59.2	 16
681	 10	723.3	146.1	 16
682	 10	887.8	80.3	 20
683	 10	823.3	76.9	 16
684	 10	655.8	75.4	 16
685	 10	156.3	20.6	 16
686	 10	96.3	17.6	 16
687	 10	107.3	18.6	 16
688	 10	70.5	16.1	 16
689	 10	78.5	9.9	 16
690	 10	82.5	12.0	 16
691	 10	219.3	26.1	 16
692	 10	98.0	15.5	 16
693	 10	88.5	14.3	 16
694	 10	106.8	18.7	 16
695	 10	93.5	13.7	 16
696	 10	94.5	16.4	 16
697	 10	153.8	24.1	 16
698	 10	143.3	17.6	 16
699	 10	126.3	16.0	 16
700	 10	106.0	15.8	 16
701	 10	99.0	16.1	 16
702	 10	78.8	9.8	 16
703	 10	89.3	15.3	 16
704	 10	97.0	10.9	 16
705	 10	115.3	18.0	 16
706	 10	105.8	16.6	 16
707	 10	138.8	19.5	 16
708	 10	328.3	40.6	 16
709	 10	437.8	49.6	 16
710	 10	160.3	19.7	 16
711	 10	7607.8	569.1	 16
  0	 11	154.0	20.6	 16
  1	 11	144.0	20.3	 16
  2	 11	99.5	16.5	 16
  3	 11	112.3	16.3	 16
  4	 11	98.8	14.9	 16
  5	 11	310.0	57.4	 16
  6	 11	100.5	14.7	 16
  7	 11	229.3	44.1	 16
  8	 11	193.8	23.4	 16
  9	 11	126.3	19.0	 16
 10	 11	129.0	19.7	 16
 11	 11	92.5	14.4	 16
 12	 11	165.5	16.0	 16
 13	 11	7656.0	732.5	 16
 14	 11	8258.0	576.9	 16
 15	 11	8319.8	619.8	 16
 16	 11	173.8	25.5	 16
 17	 11	94.3	18.1	 16
 18	 11	160.5	21.5	 16
 19	 11	7998.5	730.0	 16
 20	 11	8207.8	856.8	 16
 21	 11	8136.3	1032.3	 16
 22	 11	209.3	23.7	 16
 23	 11	107.3	12.9	 16
 24	 11	7065.3	550.5	 16
 25	 11	175.5	20.0	 16
 26	 11	181.3	26.1	 16
 27	 11	169.3	12.5	 16
 28	 11	8912.8	544.6	 16
 29	 11	102.8	11.5	 16
 30	 11	173.0	21.7	 16
 31	 11	7855.0	1603.2	 16
 32	 11	8028.3	1750.5	 16
 33	 11	7735.5	1805.6	 16
 34	 11	166.0	22.9	 16
 35	 11	115.3	40.3	 16
 36	 11	174.3	12.3	 16
 37	 11	7478.0	518.5	 16
 38	 11	7776.5	365.1	 16
 39	 11	8064.3	603.4	 16
 40	 11	170.0	25.4	 16
 41	 11	93.8	12.5	 16
 42	 11	7150.8	551.2	 16
 43	 11	173.0	12.3	 16
 44	 11	173.3	26.1	 16
 45	 11	177.3	22.4	 16
 46	 11	7853.0	606.4	 16
 47	 11	113.5	20.4	 16
 48	 11	149.0	17.4	 16
 49	 11	166.5	21.4	 16
 50	 11	6865.8	441.8	 16
 51	 11	175.3	20.0	 16
 52	 11	164.3	20.5	 16
 53	 11	97.3	13.8	 16
 54	 11	7099.5	471.4	 16
 55	 11	167.0	26.4	 16
 56	 11	175.3	27.2	 16
 57	 11	160.0	17.9	 16
 58	 11	155.8	19.7	 16
 59	 11	79.8	14.9	 16
 60	 11	80.8	14.5	 16
 61	 11	88.5	12.3	 16
 62	 11	6711.3	463.9	 16
 63	 11	181.3	24.2	 16
 64	 11	165.3	21.3	 16
 65	 11	169.5	24.6	 16
 66	 11	8392.3	575.6	 16
 67	 11	111.8	18.8	 16
 68	 11	172.8	24.4	 16
 69	 11	7366.8	870.1	 16
 70	 11	7888.0	864.2	 16
 71	 11	7839.0	1050.7	 16
 72	 11	175.5	22.3	 16
 73	 11	85.5	15.3	 16
 74	 11	157.3	22.1	 16
 75	 11	152.3	16.0	 16
 76	 11	155.3	21.9	 16
 77	 11	159.0	18.6	 16
 78	 11	179.8	18.0	 16
 79	 11	109.5	13.9	 16
 80	 11	182.8	21.5	 16
 81	 11	7048.3	1690.1	 16
 82	 11	7773.0	1936.4	 16
 83	 11	7764.3	445.9	 16
 84	 11	190.8	34.9	 16
 85	 11	96.8	19.1	 16
 86	 11	167.0	26.9	 16
 87	 11	7295.0	1034.9	 16
 88	 11	7755.5	164.6	 16
 89	 11	7449.0	660.9	 16
 90	 11	186.3	24.5	 16
 91	 11	84.5	10.0	 16
 92	 11	156.8	19.3	 16
 93	 11	7106.5	1194.7	 16
 94	 11	7116.8	871.2	 16
 95	 11	181.0	25.3	 16
 96	 11	169.8	23.6	 16
 97	 11	93.3	11.2	 16
 98	 11	162.3	23.3	 16
 99	 11	6626.0	1420.0	 16
100	 11	6885.5	1255.1	 16
101	 11	191.3	27.0	 16
102	 11	146.0	19.5	 16
103	 11	92.3	12.2	 16
104	 11	6474.8	901.9	 16
105	 11	177.3	19.0	 16
106	 11	163.5	22.9	 16
107	 11	147.8	18.4	 16
108	 11	8043.8	1273.3	 16
109	 11	112.5	30.8	 16
110	 11	91.5	15.3	 16
111	 11	118.3	22.6	 16
112	 11	437.3	66.9	 16
113	 11	135.3	18.8	 16
114	 11	198.3	21.4	 16
115	 11	235.3	21.9	 16
116	 11	184.5	23.2	 16
117	 11	147.0	19.8	 20
118	 11	115.3	13.4	 16
119	 11	149.3	20.6	 16
120	 11	150.5	19.0	 16
121	 11	168.5	28.3	 16
122	 11	239.3	40.6	 16
123	 11	315.0	59.4	 16
124	 11	177.5	21.8	 16
125	 11	108.5	18.1	 16
126	 11	129.3	19.7	 16
127	 11	261.8	56.6	 16
128	 11	105.0	10.4	 16
129	 11	172.3	21.9	 16
130	 11	1185.0	309.8	 16
131	 11	126.5	18.1	 16
132	 11	130.3	23.9	 16
133	 11	115.3	12.0	 16
134	 11	159.5	22.1	 16
135	 11	192.5	28.8	 16
136	 11	101.8	14.1	 16
137	 11	98.0	11.7	 16
138	 11	110.3	19.7	 16
139	 11	112.5	14.9	 16
140	 11	100.0	18.7	 16
141	 11	169.0	23.1	 16
142	 11	554.0	86.0	 16
143	 11	486.0	78.1	 16
144	 11	102.5	8.1	 16
145	 11	104.5	15.8	 16
146	 11	199.0	18.7	 16
147	 11	90.0	16.2	 16
148	 11	105.5	16.6	 16
149	 11	137.5	15.0	 16
150	 11	129.8	16.9	 16
151	 11	151.5	12.9	 16
152	 11	138.3	21.5	 16
153	 11	1245.0	306.5	 16
154	 11	1499.3	153.9	 16
155	 11	292.5	29.3	 16
156	 11	90.3	10.2	 16
157	 11	304.0	33.1	 16
158	 11	503.5	27.6	 16
159	 11	174.3	16.6	 16
160	 11	110.8	16.3	 16
161	 11	240.5	31.0	 16
162	 11	117.5	21.4	 16
163	 11	97.0	16.4	 16
164	 11	92.8	15.0	 16
165	 11	119.0	16.9	 16
166	 11	326.3	51.0	 16
167	 11	121.8	15.1	 16
168	 11	87.0	12.5	 16
169	 11	92.3	12.0	 16
170	 11	275.0	53.1	 16
171	 11	113.0	18.3	 16
172	 11	134.3	25.7	 16
173	 11	150.3	20.3	 16
174	 11	155.3	25.4	 16
175	 11	197.3	23.9	 16
176	 11	159.0	24.5	 16
177	 11	131.3	19.1	 16
178	 11	230.0	26.1	 16
179	 11	192.3	29.2	 16
180	 11	143.3	18.8	 16
181	 11	499.5	66.7	 16
182	 11	237.5	25.2	 16
183	 11	106.3	19.6	 16
184	 11	111.3	17.0	 16
185	 11	92.3	18.0	 16
186	 11	108.3	15.4	 16
187	 11	241.0	27.5	 16
188	 11	175.8	23.3	 16
189	 11	214.3	24.1	 16
190	 11	126.8	16.1	 16
191	 11	124.3	20.5	 16
192	 11	161.3	18.6	 16
193	 11	100.3	18.3	 16
194	 11	99.5	9.4	 16
195	 11	113.5	16.8	 16
196	 11	251.0	31.9	 16
197	 11	97.8	17.2	 16
198	 11	176.3	30.5	 16
199	 11	224.3	21.4	 16
200	 11	111.8	16.4	 16
201	 11	96.3	17.0	 16
202	 11	517.5	55.4	 16
203	 11	90.0	12.1	 16
204	 11	89.8	10.6	 16
205	 11	93.3	12.1	 16
206	 11	99.3	16.9	 16
207	 11	82.5	9.1	 16
208	 11	216.0	24.8	 16
209	 11	151.5	21.6	 16
210	 11	149.0	17.0	 16
211	 11	104.0	14.9	 16
212	 11	112.0	13.9	 16
213	 11	212.3	28.5	 16
214	 11	185.8	26.8	 16
215	 11	532.8	59.9	 16
216	 11	241.5	28.9	 16
217	 11	131.3	16.8	 16
218	 11	136.3	24.0	 16
219	 11	137.3	22.0	 16
220	 11	114.0	22.3	 16
221	 11	278.5	34.7	 16
222	 11	515.3	74.1	 16
223	 11	152.5	16.3	 16
224	 11	105.0	16.7	 16
225	 11	249.0	30.6	 16
226	 11	200.0	24.6	 16
227	 11	91.3	15.1	 16
228	 11	93.0	14.1	 16
229	 11	182.5	25.0	 16
230	 11	181.8	20.9	 16
231	 11	217.5	23.2	 16
232	 11	183.5	27.8	 16
233	 11	122.8	13.0	 16
234	 11	127.8	20.4	 16
235	 11	249.8	31.2	 16
236	 11	207.0	28.8	 16
237	 11	129.0	23.2	 16
238	 11	134.8	19.0	 16
239	 11	143.0	23.2	 16
240	 11	610.5	113.0	 16
241	 11	155.5	22.6	 16
242	 11	236.5	40.4	 16
243	 11	99.3	17.2	 16
244	 11	91.8	14.2	 16
245	 11	131.0	21.5	 16
246	 11	97.8	14.1	 16
247	 11	98.3	12.8	 16
248	 11	541.5	137.0	 16
249	 11	138.5	19.6	 16
250	 11	170.0	32.1	 16
251	 11	147.8	26.8	 16
252	 11	125.3	21.3	 16
253	 11	155.5	23.4	 16
254	 11	82.8	13.2	 16
255	 11	92.5	18.1	 16
256	 11	94.5	22.3	 16
257	 11	107.0	17.1	 16
258	 11	202.3	28.8	 16
259	 11	156.0	19.4	 20
260	 11	146.0	21.0	 16
261	 11	98.8	13.7	 16
262	 11	107.5	18.2	 16
263	 11	135.0	14.8	 16
264	 11	99.3	12.9	 16
265	 11	118.5	19.7	 16
266	 11	249.3	38.2	 16
267	 11	181.5	22.1	 16
268	 11	162.3	25.3	 16
269	 11	128.5	15.1	 16
270	 11	144.8	21.1	 16
271	 11	229.3	35.8	 16
272	 11	104.5	14.4	 16
273	 11	111.0	15.9	 16
274	 11	180.5	17.2	 16
275	 11	119.0	19.5	 16
276	 11	101.5	17.7	 16
277	 11	143.5	20.3	 16
278	 11	287.3	28.7	 16
279	 11	203.8	18.2	 16
280	 11	123.8	18.7	 16
281	 11	93.5	10.2	 16
282	 11	148.3	24.6	 16
283	 11	150.3	29.3	 16
284	 11	105.5	15.9	 16
285	 11	93.0	18.6	 16
286	 11	156.5	24.3	 16
287	 11	158.0	33.0	 16
288	 11	694.3	128.5	 16
289	 11	182.3	31.1	 16
290	 11	92.0	15.3	 16
291	 11	100.3	10.6	 16
292	 11	212.5	25.2	 16
293	 11	263.3	35.1	 16
294	 11	161.8	28.3	 16
295	 11	282.8	37.5	 16
296	 11	292.0	31.6	 16
297	 11	584.8	64.9	 16
298	 11	110.8	22.5	 16
299	 11	170.3	19.0	 16
300	 11	187.3	26.6	 16
301	 11	114.3	17.3	 16
302	 11	107.3	17.2	 16
303	 11	178.8	30.7	 16
304	 11	166.0	18.8	 16
305	 11	363.8	31.5	 16
306	 11	168.0	25.4	 16
307	 11	144.3	18.1	 16
308	 11	258.0	28.3	 16
309	 11	321.5	31.6	 16
310	 11	107.8	16.9	 16
311	 11	101.8	28.8	 16
312	 11	94.8	14.9	 16
313	 11	181.8	35.6	 16
314	 11	160.3	24.9	 16
315	 11	87.5	16.4	 16
316	 11	83.3	10.2	 16
317	 11	117.5	20.8	 16
318	 11	95.8	21.1	 16
319	 11	96.0	14.6	 16
320	 11	149.3	17.7	 16
321	 11	83.8	10.4	 16
322	 11	76.3	10.1	 16
323	 11	511.5	29.6	 16
324	 11	140.8	22.2	 16
325	 11	144.0	24.6	 16
326	 11	187.3	26.2	 16
327	 11	128.5	19.9	 16
328	 11	128.5	16.5	 16
329	 11	119.3	14.8	 16
330	 11	619.3	72.1	 16
331	 11	91.0	13.2	 16
332	 11	83.0	14.4	 16
333	 11	129.3	14.6	 16
334	 11	80.3	14.0	 16
335	 11	147.0	19.8	 16
336	 11	82.8	21.0	 16
337	 11	106.0	8.8	 16
338	 11	75.5	15.3	 16
339	 11	124.0	24.9	 16
340	 11	128.0	18.6	 16
341	 11	158.3	23.4	 16
342	 11	233.5	33.6	 16
343	 11	76.5	11.6	 16
344	 11	219.3	30.0	 16
345	 11	131.5	21.6	 16
346	 11	82.0	11.9	 16
347	 11	79.0	12.0	 16
348	 11	86.3	13.0	 16
349	 11	82.8	14.4	 16
350	 11	167.3	21.0	 16
351	 11	83.5	13.9	 16
352	 11	132.3	11.8	 16
353	 11	124.0	20.1	 16
354	 11	145.3	16.7	 16
355	 11	318.3	46.8	 16
356	 11	333.0	39.9	 16
357	 11	168.5	20.9	 16
358	 11	229.3	39.0	 16
359	 11	86.3	11.2	 16
360	 11	124.0	20.0	 16
361	 11	237.0	31.3	 16
362	 11	88.0	15.1	 16
363	 11	103.0	17.3	 16
364	 11	132.3	23.4	 16
365	 11	80.5	12.5	 16
366	 11	74.5	12.0	 16
367	 11	90.5	13.4	 16
368	 11	129.3	18.3	 16
369	 11	119.0	10.6	 16
370	 11	170.0	25.2	 16
371	 11	210.5	29.2	 16
372	 11	132.3	17.2	 16
373	 11	129.0	14.7	 16
374	 11	128.5	22.3	 16
375	 11	216.5	30.0	 16
376	 11	135.0	23.0	 16
377	 11	117.0	14.8	 16
378	 11	235.0	20.3	 16
379	 11	104.5	14.2	 16
380	 11	97.8	18.5	 16
381	 11	130.3	18.9	 16
382	 11	98.3	16.2	 16
383	 11	125.8	19.3	 16
384	 11	102.3	12.9	 16
385	 11	79.0	13.7	 16
386	 11	109.0	19.8	 16
387	 11	106.5	19.9	 16
388	 11	76.5	13.3	 16
389	 11	77.8	12.6	 16
390	 11	105.8	16.9	 16
391	 11	85.3	15.5	 16
392	 11	80.3	11.4	 16
393	 11	99.5	11.7	 16
394	 11	110.3	13.6	 16
395	 11	98.5	14.8	 16
396	 11	201.0	34.2	 16
397	 11	636.8	68.2	 16
398	 11	236.3	29.6	 16
399	 11	191.8	22.2	 16
400	 11	96.5	12.3	 16
401	 11	158.3	19.8	 20
402	 11	110.3	15.5	 16
403	 11	119.0	19.1	 16
404	 11	89.5	10.8	 16
405	 11	101.5	17.7	 16
406	 11	124.0	18.9	 16
407	 11	73.3	8.9	 16
408	 11	86.5	11.8	 16
409	 11	115.5	20.1	 16
410	 11	143.8	22.4	 16
411	 11	93.3	9.5	 16
412	 11	134.0	20.6	 16
413	 11	105.0	16.9	 16
414	 11	91.5	14.6	 16
415	 11	374.8	30.8	 16
416	 11	172.3	28.6	 16
417	 11	189.5	25.0	 16
418	 11	172.8	13.2	 16
419	 11	108.8	14.1	 16
420	 11	87.3	16.0	 16
421	 11	131.8	23.2	 16
422	 11	111.5	18.8	 16
423	 11	228.5	26.7	 16
424	 11	182.0	24.8	 16
425	 11	268.5	25.5	 16
426	 11	169.0	27.6	 16
427	 11	87.3	11.5	 16
428	 11	97.5	13.2	 16
429	 11	106.5	12.7	 16
430	 11	100.0	15.0	 16
431	 11	67.3	12.1	 16
432	 11	122.3	17.5	 16
433	 11	99.3	12.9	 16
434	 11	80.3	12.8	 16
435	 11	88.3	16.3	 16
436	 11	119.3	17.2	 16
437	 11	169.5	30.4	 16
438	 11	1318.3	247.9	 16
439	 11	189.3	21.9	 16
440	 11	106.8	14.6	 16
441	 11	131.5	20.1	 16
442	 11	105.5	13.4	 16
443	 11	196.5	27.7	 16
444	 11	88.3	15.2	 16
445	 11	328.3	43.0	 16
446	 11	109.8	16.2	 16
447	 11	126.0	30.5	 16
448	 11	97.0	17.3	 16
449	 11	92.3	18.0	 16
450	 11	120.8	27.4	 16
451	 11	146.8	18.7	 16
452	 11	119.3	19.4	 16
453	 11	95.5	20.5	 16
454	 11	110.3	13.4	 16
455	 11	156.3	30.9	 16
456	 11	93.5	13.8	 16
457	 11	217.5	30.2	 16
458	 11	175.0	24.1	 16
459	 11	137.3	20.2	 16
460	 11	165.8	25.4	 16
461	 11	71.3	11.4	 16
462	 11	106.5	21.6	 16
463	 11	197.0	20.8	 16
464	 11	164.3	19.0	 16
465	 11	80.3	8.7	 16
466	 11	89.8	14.1	 16
467	 11	74.3	8.1	 16
468	 11	129.8	17.9	 16
469	 11	353.3	47.3	 16
470	 11	103.5	13.1	 16
471	 11	131.8	26.3	 16
472	 11	173.3	24.5	 16
473	 11	93.5	21.7	 16
474	 11	74.5	14.7	 16
475	 11	81.8	11.7	 16
476	 11	124.8	23.7	 16
477	 11	81.8	12.8	 16
478	 11	113.5	16.2	 16
479	 11	126.3	14.5	 16
480	 11	91.8	13.0	 16
481	 11	252.8	46.8	 16
482	 11	117.0	18.3	 16
483	 11	88.3	14.7	 16
484	 11	72.3	8.6	 16
485	 11	85.8	13.1	 16
486	 11	246.5	55.4	 16
487	 11	128.3	20.2	 16
488	 11	97.5	15.0	 16
489	 11	77.8	14.6	 16
490	 11	95.3	15.5	 16
491	 11	81.5	13.4	 16
492	 11	111.0	16.8	 16
493	 11	96.3	14.2	 16
494	 11	207.5	20.9	 16
495	 11	96.3	18.5	 16
496	 11	396.3	35.0	 16
497	 11	423.3	54.9	 16
498	 11	418.0	44.3	 16
499	 11	304.0	33.6	 16
500	 11	117.5	25.8	 16
501	 11	94.0	12.0	 16
502	 11	78.8	14.5	 16
503	 11	87.3	15.4	 16
504	 11	276.3	41.5	 16
505	 11	104.8	17.1	 16
506	 11	84.5	16.6	 16
507	 11	76.0	9.6	 16
508	 11	84.0	13.3	 16
509	 11	74.3	11.5	 16
510	 11	109.0	22.7	 16
511	 11	122.0	16.3	 16
512	 11	97.3	17.5	 16
513	 11	146.0	23.4	 16
514	 11	153.3	27.7	 16
515	 11	85.3	15.9	 16
516	 11	109.0	12.8	 16
517	 11	226.0	36.0	 16
518	 11	99.8	18.9	 16
519	 11	293.5	65.2	 16
520	 11	400.3	51.7	 16
521	 11	303.0	29.2	 16
522	 11	79.5	11.5	 16
523	 11	79.5	13.6	 16
524	 11	108.5	15.4	 16
525	 11	83.5	13.7	 16
526	 11	84.8	18.2	 16
527	 11	92.3	14.9	 16
528	 11	75.0	15.2	 16
529	 11	119.5	20.5	 16
530	 11	103.3	14.7	 16
531	 11	70.5	11.5	 16
532	 11	145.3	31.1	 16
533	 11	111.0	16.5	 16
534	 11	92.5	15.4	 16
535	 11	97.0	16.7	 16
536	 11	352.3	68.9	 16
537	 11	323.0	51.7	 16
538	 11	190.3	24.6	 16
539	 11	472.8	70.3	 16
540	 11	508.3	84.3	 16
541	 11	126.3	20.0	 16
542	 11	108.3	17.0	 16
543	 11	117.5	15.4	 16
544	 11	90.3	15.8	 20
545	 11	137.5	15.7	 16
546	 11	110.5	18.9	 16
547	 11	162.3	18.0	 16
548	 11	126.5	16.6	 16
549	 11	93.5	17.9	 16
550	 11	181.3	29.5	 16
551	 11	123.8	17.5	 16
552	 11	94.5	14.5	 16
553	 11	141.0	14.5	 16
554	 11	554.0	101.0	 16
555	 11	154.0	35.4	 16
556	 11	263.3	37.8	 16
557	 11	104.3	22.6	 16
558	 11	1263.3	111.5	 16
559	 11	142.5	27.6	 16
560	 11	366.3	30.2	 16
561	 11	636.0	45.3	 16
562	 11	373.8	34.2	 16
563	 11	143.3	17.7	 16
564	 11	262.8	38.2	 16
565	 11	251.0	24.9	 16
566	 11	87.5	16.5	 16
567	 11	109.3	11.0	 16
568	 11	139.0	31.9	 16
569	 11	109.3	17.7	 16
570	 11	2006.0	308.4	 16
571	 11	247.5	25.5	 16
572	 11	93.0	16.8	 16
573	 11	86.0	16.5	 16
574	 11	119.0	17.3	 16
575	 11	108.0	9.9	 16
576	 11	113.0	16.6	 16
577	 11	136.8	13.1	 16
578	 11	154.8	20.6	 16
579	 11	420.8	75.7	 16
580	 11	120.5	23.3	 16
581	 11	315.5	48.7	 16
582	 11	99.5	20.7	 16
583	 11	218.0	29.3	 16
584	 11	97.8	18.9	 16
585	 11	189.3	21.3	 16
586	 11	130.3	23.2	 16
587	 11	179.3	18.2	 16
588	 11	90.0	12.3	 16
589	 11	313.0	41.4	 16
590	 11	146.8	20.7	 16
591	 11	157.8	14.9	 16
592	 11	223.5	31.1	 16
593	 11	105.3	11.3	 16
594	 11	245.8	49.1	 16
595	 11	201.0	25.0	 16
596	 11	348.5	34.7	 16
597	 11	269.8	50.2	 16
598	 11	136.0	26.5	 16
599	 11	155.8	18.0	 16
600	 11	91.5	15.9	 16
601	 11	124.0	20.5	 16
602	 11	154.3	19.5	 16
603	 11	208.5	33.4	 16
604	 11	334.3	69.7	 16
605	 11	84.0	13.2	 16
606	 11	116.8	16.7	 16
607	 11	77.3	13.6	 16
608	 11	90.3	14.1	 16
609	 11	94.3	16.2	 16
610	 11	83.0	13.7	 16
611	 11	295.5	44.8	 16
612	 11	210.5	30.1	 16
613	 11	198.0	28.3	 16
614	 11	216.5	45.9	 16
615	 11	121.8	44.8	 16
616	 11	84.5	17.4	 16
617	 11	125.8	19.5	 16
618	 11	112.0	18.4	 16
619	 11	224.8	29.7	 16
620	 11	89.3	14.3	 16
621	 11	73.8	15.0	 16
622	 11	80.0	10.1	 16
623	 11	81.3	14.2	 16
624	 11	109.0	17.1	 16
625	 11	79.0	9.8	 16
626	 11	93.3	20.0	 16
627	 11	212.3	38.5	 16
628	 11	167.0	27.2	 16
629	 11	82.3	15.1	 16
630	 11	110.0	13.7	 16
631	 11	181.3	24.2	 16
632	 11	190.3	26.0	 16
633	 11	158.3	26.4	 16
634	 11	258.3	24.7	 16
635	 11	101.0	14.6	 16
636	 11	96.5	15.7	 16
637	 11	169.3	23.4	 16
638	 11	108.5	15.6	 16
639	 11	79.5	16.6	 16
640	 11	102.5	10.2	 16
641	 11	138.5	22.6	 16
642	 11	126.0	19.7	 16
643	 11	212.3	29.8	 16
644	 11	193.5	26.6	 16
645	 11	125.3	15.4	 16
646	 11	106.3	16.5	 16
647	 11	116.0	18.6	 16
648	 11	101.3	13.9	 16
649	 11	228.5	51.6	 16
650	 11	95.3	13.6	 16
651	 11	95.0	20.6	 16
652	 11	79.5	13.4	 16
653	 11	69.3	12.6	 16
654	 11	78.3	8.7	 16
655	 11	122.0	24.9	 16
656	 11	92.0	13.3	 16
657	 11	61.5	9.5	 16
658	 11	240.5	52.7	 16
659	 11	98.3	19.4	 16
660	 11	108.0	17.7	 16
661	 11	73.3	13.1	 16
662	 11	112.3	23.0	 16
663	 11	940.5	257.3	 16
664	 11	223.8	47.0	 16
665	 11	189.8	19.9	 16
666	 11	247.5	37.6	 16
667	 11	103.8	15.8	 16
668	 11	193.5	32.5	 16
669	 11	274.0	58.7	 16
670	 11	180.5	39.8	 16
671	 11	674.5	136.9	 16
672	 11	234.3	32.6	 16
673	 11	99.5	12.8	 16
674	 11	105.0	15.5	 16
675	 11	110.5	18.1	 16
676	 11	98.0	18.8	 16
677	 11	257.5	41.0	 16
678	 11	363.5	65.8	 16
679	 11	205.5	40.5	 16
680	 11	202.0	29.3	 16
681	 11	106.3	11.7	 16
682	 11	456.5	87.7	 16
683	 11	166.5	25.8	 16
684	 11	418.0	90.7	 16
685	 11	164.0	22.3	 16
686	 11	102.0	15.0	 20
687	 11	85.8	20.6	 16
688	 11	79.3	11.2	 16
689	 11	84.5	16.6	 16
690	 11	84.0	15.0	 16
691	 11	88.3	14.9	 16
692	 11	74.8	11.1	 16
693	 11	83.5	11.8	 16
694	 11	157.8	22.4	 16
695	 11	126.8	20.6	 16
696	 11	75.3	13.6	 16
697	 11	263.3	45.1	 16
698	 11	173.3	25.1	 16
699	 11	254.5	49.8	 16
700	 11	148.0	25.8	 16
701	 11	179.5	20.5	 16
702	 11	220.8	27.0	 16
703	 11	134.0	14.8	 16
704	 11	76.3	10.7	 16
705	 11	181.3	20.9	 16
706	 11	162.5	28.5	 16
707	 11	120.5	13.3	 16
708	 11	155.3	25.5	 16
709	 11	148.8	24.0	 16
710	 11	241.5	33.7	 16
711	 11	143.3	23.3	 16
  0	 12	5503.0	715.6	 16
  1	 12	158.3	39.0	 16
  2	 12	95.3	14.2	 16
  3	 12	125.3	22.4	 16
  4	 12	96.5	15.3	 16
  5	 12	119.5	18.0	 16
  6	 12	94.5	13.5	 16
  7	 12	161.5	22.7	 16
  8	 12	179.3	19.4	 16
  9	 12	123.8	18.6	 16
 10	 12	135.8	17.8	 16
 11	 12	86.8	16.8	 16
 12	 12	83.5	12.6	 16
 13	 12	90.8	16.0	 16
 14	 12	87.0	12.7	 16
 15	 12	93.0	15.7	 16
 16	 12	82.3	10.5	 16
 17	 12	81.0	10.5	 16
 18	 12	86.5	13.3	 16
 19	 12	106.3	25.2	 16
 20	 12	102.5	16.6	 16
 21	 12	104.3	21.4	 16
 22	 12	86.5	12.0	 16
 23	 12	77.3	9.1	 16
 24	 12	85.5	10.4	 16
 25	 12	87.8	15.1	 16
 26	 12	91.3	16.0	 16
 27	 12	66.3	9.3	 16
 28	 12	96.8	17.6	 16
 29	 12	75.3	8.9	 16
 30	 12	84.8	15.2	 16
 31	 12	106.0	25.6	 16
 32	 12	83.5	26.8	 16
 33	 12	101.8	30.3	 16
 34	 12	83.5	7.7	 16
 35	 12	74.3	12.0	 16
 36	 12	83.5	13.0	 16
 37	 12	85.3	11.2	 16
 38	 12	90.0	16.5	 16
 39	 12	93.5	16.8	 16
 40	 12	82.0	12.5	 16
 41	 12	85.0	17.6	 16
 42	 12	88.0	14.4	 16
 43	 12	87.3	12.6	 16
 44	 12	87.0	9.8	 16
 45	 12	78.8	14.3	 16
 46	 12	96.5	12.6	 16
 47	 12	81.0	17.4	 16
 48	 12	81.3	12.5	 16
 49	 12	81.8	13.4	 16
 50	 12	94.3	19.0	 16
 51	 12	83.3	16.0	 16
 52	 12	79.3	10.5	 16
 53	 12	93.3	21.7	 16
 54	 12	94.8	16.0	 16
 55	 12	92.0	16.2	 16
 56	 12	83.8	11.4	 16
 57	 12	82.0	17.3	 16
 58	 12	74.8	11.5	 16
 59	 12	87.8	15.1	 16
 60	 12	72.0	15.1	 16
 61	 12	77.0	11.9	 16
 62	 12	89.3	14.0	 16
 63	 12	81.0	16.7	 16
 64	 12	93.0	18.7	 16
 65	 12	76.8	12.7	 16
 66	 12	81.5	16.1	 16
 67	 12	78.8	10.8	 16
 68	 12	71.5	12.2	 16
 69	 12	90.8	17.8	 16
 70	 12	85.5	11.1	 16
 71	 12	94.3	14.3	 16
 72	 12	75.0	14.7	 16
 73	 12	74.8	11.5	 16
 74	 12	87.3	11.7	 16
 75	 12	89.0	12.4	 16
 76	 12	97.5	17.4	 16
 77	 12	107.8	17.8	 16
 78	 12	97.3	10.6	 16
 79	 12	90.0	14.2	 16
 80	 12	81.3	11.5	 16
 81	 12	93.3	20.6	 16
 82	 12	100.5	21.4	 16
 83	 12	81.0	15.6	 16
 84	 12	75.0	10.5	 16
 85	 12	76.5	7.6	 16
 86	 12	79.0	8.7	 16
 87	 12	88.0	14.5	 16
 88	 12	84.3	16.6	 16
 89	 12	87.0	14.1	 16
 90	 12	81.0	13.1	 16
 91	 12	86.0	14.7	 16
 92	 12	85.8	13.7	 16
 93	 12	88.8	13.7	 16
 94	 12	92.0	16.9	 16
 95	 12	79.3	12.0	 16
 96	 12	81.3	11.3	 16
 97	 12	86.3	14.5	 16
 98	 12	76.5	11.0	 16
 99	 12	90.3	11.1	 16
100	 12	99.0	22.3	 16
101	 12	91.3	19.1	 16
102	 12	80.3	12.2	 16
103	 12	66.3	9.1	 16
104	 12	89.5	14.6	 16
105	 12	88.3	14.5	 16
106	 12	80.5	11.8	 16
107	 12	81.5	13.4	 16
108	 12	78.3	14.3	 16
109	 12	81.5	12.5	 16
110	 12	82.8	18.7	 16
111	 12	98.0	14.2	 16
112	 12	118.3	16.1	 16
113	 12	278.3	35.5	 16
114	 12	185.5	22.4	 16
115	 12	174.0	19.6	 16
116	 12	171.3	24.0	 16
117	 12	124.5	18.6	 16
118	 12	104.5	16.8	 16
119	 12	125.8	22.9	 16
120	 12	116.5	12.4	 16
121	 12	128.8	17.3	 20
122	 12	104.8	15.8	 16
123	 12	150.0	27.6	 16
124	 12	210.3	31.2	 16
125	 12	108.5	16.1	 16
126	 12	123.8	16.5	 16
127	 12	155.3	33.0	 16
128	 12	108.0	9.4	 16
129	 12	145.8	19.9	 16
130	 12	187.8	29.4	 16
131	 12	100.0	16.5	 16
132	 12	100.3	15.9	 16
133	 12	110.3	18.8	 16
134	 12	131.8	17.2	 16
135	 12	216.8	26.5	 16
136	 12	101.0	17.4	 16
137	 12	90.5	11.5	 16
138	 12	90.5	13.3	 16
139	 12	95.3	12.4	 16
140	 12	86.3	12.3	 16
141	 12	160.8	23.7	 16
142	 12	194.0	26.0	 16
143	 12	187.8	28.9	 16
144	 12	101.3	17.3	 16
145	 12	110.3	12.7	 16
146	 12	94.3	13.7	 16
147	 12	83.3	12.9	 16
148	 12	95.8	15.2	 16
149	 12	125.0	17.4	 16
150	 12	108.8	10.8	 16
151	 12	172.5	27.8	 16
152	 12	141.5	18.7	 16
153	 12	218.0	39.5	 16
154	 12	333.3	34.4	 16
155	 12	91.3	14.4	 16
156	 12	98.0	18.9	 16
157	 12	165.3	20.7	 16
158	 12	466.8	36.5	 16
159	 12	139.8	22.3	 16
160	 12	105.3	15.0	 16
161	 12	147.0	23.1	 16
162	 12	110.3	19.2	 16
163	 12	88.3	14.4	 16
164	 12	89.3	16.2	 16
165	 12	117.5	13.8	 16
166	 12	156.0	26.7	 16
167	 12	124.3	37.1	 16
168	 12	82.3	8.9	 16
169	 12	101.0	13.5	 16
170	 12	155.3	25.9	 16
171	 12	104.0	13.1	 16
172	 12	141.0	20.4	 16
173	 12	119.0	13.8	 16
174	 12	93.3	12.6	 16
175	 12	131.0	20.7	 16
176	 12	159.5	20.0	 16
177	 12	141.0	27.0	 16
178	 12	141.3	20.0	 16
179	 12	145.8	16.3	 16
180	 12	159.5	27.0	 16
181	 12	180.5	24.4	 16
182	 12	198.5	30.4	 16
183	 12	89.0	11.4	 16
184	 12	119.5	13.9	 16
185	 12	115.3	16.5	 16
186	 12	106.5	11.6	 16
187	 12	258.8	37.1	 16
188	 12	103.5	9.0	 16
189	 12	150.0	23.8	 16
190	 12	119.3	14.1	 16
191	 12	97.3	13.5	 16
192	 12	128.3	16.9	 16
193	 12	93.3	12.3	 16
194	 12	113.0	19.4	 16
195	 12	101.5	14.5	 16
196	 12	139.5	22.3	 16
197	 12	103.8	20.3	 16
198	 12	106.0	11.7	 16
199	 12	253.3	20.0	 16
200	 12	110.5	21.8	 16
201	 12	103.0	11.4	 16
202	 12	106.8	12.0	 16
203	 12	90.0	11.7	 16
204	 12	82.3	10.3	 16
205	 12	99.5	17.2	 16
206	 12	85.8	14.6	 16
207	 12	87.0	15.6	 16
208	 12	98.8	14.5	 16
209	 12	111.0	16.5	 16
210	 12	98.5	16.8	 16
211	 12	107.5	21.5	 16
212	 12	160.3	26.2	 16
213	 12	143.5	22.5	 16
214	 12	160.5	19.7	 16
215	 12	414.8	23.8	 16
216	 12	269.0	26.4	 16
217	 12	150.3	21.8	 16
218	 12	92.0	13.2	 16
219	 12	109.5	14.1	 16
220	 12	97.3	16.7	 16
221	 12	155.5	41.2	 16
222	 12	230.5	30.7	 16
223	 12	124.8	24.7	 16
224	 12	96.3	15.9	 16
225	 12	130.0	25.4	 16
226	 12	98.5	10.9	 16
227	 12	91.3	17.6	 16
228	 12	97.0	15.4	 16
229	 12	185.8	24.1	 16
230	 12	201.8	15.2	 16
231	 12	169.3	23.6	 16
232	 12	119.0	14.7	 16
233	 12	127.8	18.1	 16
234	 12	123.5	18.5	 16
235	 12	213.3	24.1	 16
236	 12	173.5	19.8	 16
237	 12	119.0	13.6	 16
238	 12	157.5	21.9	 16
239	 12	118.3	15.2	 16
240	 12	166.5	20.2	 16
241	 12	122.8	45.7	 16
242	 12	110.8	13.1	 16
243	 12	115.3	17.7	 16
244	 12	113.3	16.3	 16
245	 12	84.0	13.0	 16
246	 12	87.5	16.4	 16
247	 12	98.3	13.8	 16
248	 12	103.8	25.2	 16
249	 12	91.0	17.6	 16
250	 12	103.8	18.7	 16
251	 12	149.3	20.7	 16
252	 12	114.0	16.2	 16
253	 12	142.3	15.2	 16
254	 12	91.5	12.2	 16
255	 12	86.3	13.4	 16
256	 12	92.5	15.7	 16
257	 12	93.5	12.3	 16
258	 12	161.3	57.7	 16
259	 12	143.0	18.4	 16
260	 12	144.5	21.8	 16
261	 12	95.8	12.7	 16
262	 12	93.8	12.5	 16
263	 12	109.8	17.5	 20
264	 12	87.3	11.1	 16
265	 12	116.8	19.0	 16
266	 12	291.8	22.5	 16
267	 12	150.5	33.0	 16
268	 12	138.3	16.1	 16
269	 12	129.8	22.9	 16
270	 12	164.5	21.9	 16
271	 12	148.3	15.9	 16
272	 12	99.3	14.1	 16
273	 12	96.5	14.3	 16
274	 12	183.3	17.1	 16
275	 12	188.3	27.6	 16
276	 12	87.3	14.0	 16
277	 12	109.0	15.4	 16
278	 12	137.8	15.5	 16
279	 12	127.8	20.9	 16
280	 12	97.3	10.8	 16
281	 12	108.3	13.8	 16
282	 12	166.3	22.5	 16
283	 12	111.5	12.5	 16
284	 12	100.8	17.1	 16
285	 12	89.8	15.7	 16
286	 12	120.3	14.0	 16
287	 12	103.3	16.0	 16
288	 12	196.5	23.7	 16
289	 12	120.3	17.9	 16
290	 12	97.3	18.1	 16
291	 12	94.5	17.4	 16
292	 12	107.8	14.7	 16
293	 12	111.0	22.5	 16
294	 12	88.3	12.7	 16
295	 12	170.3	20.0	 16
296	 12	187.3	24.0	 16
297	 12	106.0	14.8	 16
298	 12	114.3	16.8	 16
299	 12	145.8	24.8	 16
300	 12	120.3	20.4	 16
301	 12	128.3	21.2	 16
302	 12	119.3	22.9	 16
303	 12	148.3	29.3	 16
304	 12	163.3	22.1	 16
305	 12	501.0	32.5	 16
306	 12	164.3	25.2	 16
307	 12	143.5	18.1	 16
308	 12	240.8	23.0	 16
309	 12	333.3	39.3	 16
310	 12	103.5	10.0	 16
311	 12	125.0	33.6	 16
312	 12	88.5	18.1	 16
313	 12	159.0	15.6	 16
314	 12	82.5	21.0	 16
315	 12	87.3	14.5	 16
316	 12	85.3	15.0	 16
317	 12	90.0	16.0	 16
318	 12	77.3	10.0	 16
319	 12	119.0	17.2	 16
320	 12	79.0	12.5	 16
321	 12	89.0	17.7	 16
322	 12	77.3	13.0	 16
323	 12	161.0	23.1	 16
324	 12	189.3	25.5	 16
325	 12	81.0	15.3	 16
326	 12	109.3	16.3	 16
327	 12	106.8	14.3	 16
328	 12	107.0	11.4	 16
329	 12	115.0	16.5	 16
330	 12	174.5	20.5	 16
331	 12	91.3	12.6	 16
332	 12	85.5	16.3	 16
333	 12	109.8	19.6	 16
334	 12	88.0	16.7	 16
335	 12	130.3	19.7	 16
336	 12	85.8	14.5	 16
337	 12	107.0	20.4	 16
338	 12	83.0	14.0	 16
339	 12	93.3	19.9	 16
340	 12	87.5	12.7	 16
341	 12	147.3	19.0	 16
342	 12	133.8	17.1	 16
343	 12	70.3	9.9	 16
344	 12	127.3	14.6	 16
345	 12	106.3	13.2	 16
346	 12	89.3	19.7	 16
347	 12	77.3	14.6	 16
348	 12	92.0	13.4	 16
349	 12	83.0	13.2	 16
350	 12	329.3	41.3	 16
351	 12	92.5	16.7	 16
352	 12	110.3	10.2	 16
353	 12	156.5	18.8	 16
354	 12	178.3	29.1	 16
355	 12	187.0	26.5	 16
356	 12	170.0	25.8	 16
357	 12	90.0	14.7	 16
358	 12	91.8	14.5	 16
359	 12	93.8	14.4	 16
360	 12	145.3	21.3	 16
361	 12	280.3	44.6	 16
362	 12	85.3	10.9	 16
363	 12	76.3	12.4	 16
364	 12	114.8	15.4	 16
365	 12	94.3	12.4	 16
366	 12	90.0	16.0	 16
367	 12	72.8	14.8	 16
368	 12	90.3	19.1	 16
369	 12	134.0	15.0	 16
370	 12	133.5	17.0	 16
371	 12	233.8	32.9	 16
372	 12	173.8	22.6	 16
373	 12	87.5	16.1	 16
374	 12	78.3	12.7	 16
375	 12	160.0	23.6	 16
376	 12	100.3	14.5	 16
377	 12	116.8	18.8	 16
378	 12	139.3	24.7	 16
379	 12	109.3	17.5	 16
380	 12	77.3	11.0	 16
381	 12	121.0	18.0	 16
382	 12	130.5	19.4	 16
383	 12	82.5	12.4	 16
384	 12	146.5	21.9	 16
385	 12	63.0	10.8	 16
386	 12	98.5	20.2	 16
387	 12	87.5	15.0	 16
388	 12	72.8	19.8	 16
389	 12	76.5	12.0	 16
390	 12	92.5	16.3	 16
391	 12	78.0	10.8	 16
392	 12	78.3	12.5	 16
393	 12	90.5	13.4	 16
394	 12	71.0	17.8	 16
395	 12	83.3	13.4	 16
396	 12	116.8	14.9	 16
397	 12	343.8	35.2	 16
398	 12	193.8	19.4	 16
399	 12	136.3	23.7	 16
400	 12	114.5	16.5	 16
401	 12	109.5	12.0	 16
402	 12	123.5	23.8	 16
403	 12	98.3	13.5	 16
404	 12	100.3	10.6	 16
405	 12	93.3	16.3	 20
406	 12	94.5	13.7	 16
407	 12	80.3	13.9	 16
408	 12	88.3	7.2	 16
409	 12	130.5	15.6	 16
410	 12	192.5	22.1	 16
411	 12	102.3	15.2	 16
412	 12	107.0	13.0	 16
413	 12	109.5	13.7	 16
414	 12	90.0	13.1	 16
415	 12	182.0	28.8	 16
416	 12	131.3	20.8	 16
417	 12	130.8	19.5	 16
418	 12	158.3	19.9	 16
419	 12	96.8	17.6	 16
420	 12	85.3	14.3	 16
421	 12	127.3	17.9	 16
422	 12	98.3	14.6	 16
423	 12	132.5	23.8	 16
424	 12	285.3	31.1	 16
425	 12	205.5	25.5	 16
426	 12	181.0	21.8	 16
427	 12	85.8	15.6	 16
428	 12	76.0	12.4	 16
429	 12	79.3	12.2	 16
430	 12	92.5	18.4	 16
431	 12	79.5	11.2	 16
432	 12	91.0	15.6	 16
433	 12	97.3	18.6	 16
434	 12	88.3	14.9	 16
435	 12	83.5	16.5	 16
436	 12	82.3	13.0	 16
437	 12	97.0	16.2	 16
438	 12	417.3	87.1	 16
439	 12	125.0	21.0	 16
440	 12	104.3	11.8	 16
441	 12	240.5	23.1	 16
442	 12	100.3	12.3	 16
443	 12	123.8	18.2	 16
444	 12	82.3	8.6	 16
445	 12	290.8	40.8	 16
446	 12	103.5	15.1	 16
447	 12	115.8	18.0	 16
448	 12	85.3	10.3	 16
449	 12	108.0	16.6	 16
450	 12	91.3	9.3	 16
451	 12	124.0	17.4	 16
452	 12	87.8	13.3	 16
453	 12	86.0	17.2	 16
454	 12	119.8	18.8	 16
455	 12	66.8	10.1	 16
456	 12	89.8	17.1	 16
457	 12	201.3	20.8	 16
458	 12	171.8	19.0	 16
459	 12	131.0	17.2	 16
460	 12	80.5	14.3	 16
461	 12	97.3	14.8	 16
462	 12	141.5	16.3	 16
463	 12	249.3	28.9	 16
464	 12	113.0	24.4	 16
465	 12	75.0	12.4	 16
466	 12	74.5	12.9	 16
467	 12	61.3	11.4	 16
468	 12	75.3	7.5	 16
469	 12	196.5	24.0	 16
470	 12	117.3	16.2	 16
471	 12	158.8	20.8	 16
472	 12	182.3	23.7	 16
473	 12	95.8	18.1	 16
474	 12	71.8	11.0	 16
475	 12	70.3	12.3	 16
476	 12	86.3	14.6	 16
477	 12	89.3	9.9	 16
478	 12	109.3	17.6	 16
479	 12	94.0	10.4	 16
480	 12	97.3	13.2	 16
481	 12	141.3	17.6	 16
482	 12	104.0	17.6	 16
483	 12	73.3	12.4	 16
484	 12	76.3	9.6	 16
485	 12	75.0	13.0	 16
486	 12	124.5	20.2	 16
487	 12	87.3	14.9	 16
488	 12	80.0	13.1	 16
489	 12	77.0	12.0	 16
490	 12	93.0	41.4	 16
491	 12	93.3	23.8	 16
492	 12	92.0	13.8	 16
493	 12	64.3	8.2	 16
494	 12	334.5	38.0	 16
495	 12	92.5	12.6	 16
496	 12	1898.3	111.6	 16
497	 12	1989.8	100.4	 16
498	 12	1841.5	114.7	 16
499	 12	301.5	31.7	 16
500	 12	94.8	16.5	 16
501	 12	72.5	10.6	 16
502	 12	69.0	14.0	 16
503	 12	77.3	14.5	 16
504	 12	113.3	15.3	 16
505	 12	75.8	16.2	 16
506	 12	81.0	11.5	 16
507	 12	74.0	13.3	 16
508	 12	79.3	13.6	 16
509	 12	67.8	11.2	 16
510	 12	117.0	19.3	 16
511	 12	167.3	21.8	 16
512	 12	99.3	13.9	 16
513	 12	134.0	13.1	 16
514	 12	152.3	22.3	 16
515	 12	78.3	9.5	 16
516	 12	97.5	16.3	 16
517	 12	98.0	12.5	 16
518	 12	90.8	14.5	 16
519	 12	90.0	18.5	 16
520	 12	86.3	10.7	 16
521	 12	138.8	19.0	 16
522	 12	83.3	10.9	 16
523	 12	77.5	12.7	 16
524	 12	214.8	25.5	 16
525	 12	72.5	14.5	 16
526	 12	84.8	14.8	 16
527	 12	78.5	15.1	 16
528	 12	82.3	13.3	 16
529	 12	169.5	22.0	 16
530	 12	76.5	14.0	 16
531	 12	68.3	11.7	 16
532	 12	94.3	14.7	 16
533	 12	95.5	10.6	 16
534	 12	91.3	10.9	 16
535	 12	101.8	14.7	 16
536	 12	148.5	18.6	 16
537	 12	135.3	23.9	 16
538	 12	145.8	23.8	 16
539	 12	316.8	59.3	 16
540	 12	186.3	27.1	 16
541	 12	163.8	25.4	 16
542	 12	148.0	24.2	 16
543	 12	116.0	18.0	 16
544	 12	83.0	12.5	 16
545	 12	92.5	17.5	 16
546	 12	82.3	11.7	 16
547	 12	139.5	20.2	 16
548	 12	101.8	14.6	 20
549	 12	91.5	13.4	 16
550	 12	102.5	18.5	 16
551	 12	81.3	9.7	 16
552	 12	82.8	13.3	 16
553	 12	122.5	19.2	 16
554	 12	169.5	22.1	 16
555	 12	110.3	18.5	 16
556	 12	135.5	21.9	 16
557	 12	107.8	15.3	 16
558	 12	216.8	27.8	 16
559	 12	130.3	17.8	 16
560	 12	468.0	44.3	 16
561	 12	502.0	58.1	 16
562	 12	156.5	28.6	 16
563	 12	128.0	23.4	 16
564	 12	127.5	16.2	 16
565	 12	153.5	25.1	 16
566	 12	93.3	15.1	 16
567	 12	145.8	23.8	 16
568	 12	82.8	12.8	 16
569	 12	71.5	11.2	 16
570	 12	297.8	43.2	 16
571	 12	178.3	28.2	 16
572	 12	88.5	10.2	 16
573	 12	85.0	14.1	 16
574	 12	96.3	11.4	 16
575	 12	108.3	11.6	 16
576	 12	95.8	15.6	 16
577	 12	116.5	16.1	 16
578	 12	188.0	33.0	 16
579	 12	203.8	34.0	 16
580	 12	112.8	19.5	 16
581	 12	190.3	31.2	 16
582	 12	97.3	19.3	 16
583	 12	243.0	35.1	 16
584	 12	116.8	13.3	 16
585	 12	248.5	25.2	 16
586	 12	288.5	22.9	 16
587	 12	92.5	22.1	 16
588	 12	96.5	14.1	 16
589	 12	155.3	19.4	 16
590	 12	140.0	17.6	 16
591	 12	135.8	26.3	 16
592	 12	154.3	21.7	 16
593	 12	111.3	20.8	 16
594	 12	245.3	20.2	 16
595	 12	152.8	25.8	 16
596	 12	154.5	21.2	 16
597	 12	147.0	17.7	 16
598	 12	146.8	23.2	 16
599	 12	135.3	14.9	 16
600	 12	342.0	60.1	 16
601	 12	126.8	16.2	 16
602	 12	134.0	17.6	 16
603	 12	138.0	24.1	 16
604	 12	122.3	17.7	 16
605	 12	83.0	14.5	 16
606	 12	75.5	16.5	 16
607	 12	87.3	13.8	 16
608	 12	84.5	18.1	 16
609	 12	85.3	16.2	 16
610	 12	82.0	15.6	 16
611	 12	104.3	17.6	 16
612	 12	126.3	20.3	 16
613	 12	257.3	31.2	 16
614	 12	120.3	17.0	 16
615	 12	108.8	12.9	 16
616	 12	73.0	12.3	 16
617	 12	118.5	16.0	 16
618	 12	119.0	21.6	 16
619	 12	274.0	32.4	 16
620	 12	77.8	21.3	 16
621	 12	84.5	11.8	 16
622	 12	67.3	10.3	 16
623	 12	80.0	10.6	 16
624	 12	77.3	12.3	 16
625	 12	88.8	16.1	 16
626	 12	94.5	12.6	 16
627	 12	101.8	13.9	 16
628	 12	116.5	16.0	 16
629	 12	70.0	11.6	 16
630	 12	82.8	11.3	 16
631	 12	102.8	15.1	 16
632	 12	119.3	15.4	 16
633	 12	127.3	14.0	 16
634	 12	192.0	21.6	 16
635	 12	107.3	14.3	 16
636	 12	85.3	11.1	 16
637	 12	95.0	12.2	 16
638	 12	103.3	15.8	 16
639	 12	73.3	10.3	 16
640	 12	167.8	30.3	 16
641	 12	110.5	17.0	 16
642	 12	101.0	13.3	 16
643	 12	119.5	18.4	 16
644	 12	152.5	22.4	 16
645	 12	105.0	16.3	 16
646	 12	129.0	20.9	 16
647	 12	140.3	29.1	 16
648	 12	106.0	15.8	 16
649	 12	195.8	20.5	 16
650	 12	116.3	19.7	 16
651	 12	84.5	15.9	 16
652	 12	76.3	14.1	 16
653	 12	74.0	11.9	 16
654	 12	76.5	8.9	 16
655	 12	111.3	15.4	 16
656	 12	80.5	10.1	 16
657	 12	74.8	14.5	 16
658	 12	128.5	23.7	 16
659	 12	91.3	12.5	 16
660	 12	77.0	14.1	 16
661	 12	81.3	10.5	 16
662	 12	107.0	22.9	 16
663	 12	183.8	41.0	 16
664	 12	127.3	16.7	 16
665	 12	93.5	14.4	 16
666	 12	145.5	22.6	 16
667	 12	102.5	17.0	 16
668	 12	156.3	19.8	 16
669	 12	194.8	20.0	 16
670	 12	129.0	19.9	 16
671	 12	255.5	43.3	 16
672	 12	273.5	25.6	 16
673	 12	94.3	12.4	 16
674	 12	117.3	10.1	 16
675	 12	83.3	19.2	 16
676	 12	103.3	14.2	 16
677	 12	119.8	16.4	 16
678	 12	140.3	23.8	 16
679	 12	238.0	34.2	 16
680	 12	253.0	25.0	 16
681	 12	167.8	27.6	 16
682	 12	143.8	23.3	 16
683	 12	170.5	19.1	 16
684	 12	150.0	24.8	 16
685	 12	188.8	27.5	 16
686	 12	116.0	19.2	 16
687	 12	84.3	14.1	 16
688	 12	79.0	10.2	 16
689	 12	81.3	11.8	 16
690	 12	87.0	12.6	 20
691	 12	79.3	16.5	 16
692	 12	79.5	12.1	 16
693	 12	79.5	13.1	 16
694	 12	109.3	18.2	 16
695	 12	105.0	17.7	 16
696	 12	71.0	17.4	 16
697	 12	126.0	21.7	 16
698	 12	89.8	16.8	 16
699	 12	122.5	20.0	 16
700	 12	168.3	22.6	 16
701	 12	108.3	18.1	 16
702	 12	102.0	17.8	 16
703	 12	89.3	14.0	 16
704	 12	95.3	15.1	 16
705	 12	116.3	12.9	 16
706	 12	114.8	18.5	 16
707	 12	140.3	19.6	 16
708	 12	156.5	12.7	 16
709	 12	141.3	18.8	 16
710	 12	137.0	19.5	 16
711	 12	7667.8	623.0	 16
  0	 13	160.8	18.3	 16
  1	 13	179.8	22.9	 16
  2	 13	98.8	15.4	 16
  3	 13	110.0	16.4	 16
  4	 13	154.0	20.3	 16
  5	 13	136.3	16.1	 16
  6	 13	101.0	9.6	 16
  7	 13	124.8	13.5	 16
  8	 13	141.0	19.1	 16
  9	 13	226.3	35.2	 16
 10	 13	123.3	17.8	 16
 11	 13	130.5	20.6	 16
 12	 13	114.0	25.1	 16
 13	 13	117.8	9.8	 16
 14	 13	121.3	12.8	 16
 15	 13	172.3	20.2	 16
 16	 13	284.5	36.6	 16
 17	 13	285.8	28.0	 16
 18	 13	118.0	16.4	 16
 19	 13	120.0	19.9	 16
 20	 13	147.3	21.2	 16
 21	 13	213.3	27.8	 16
 22	 13	131.5	23.2	 16
 23	 13	124.3	23.8	 16
 24	 13	115.0	17.7	 16
 25	 13	134.5	17.9	 16
 26	 13	117.5	15.4	 16
 27	 13	498.3	69.6	 16
 28	 13	147.3	24.7	 16
 29	 13	112.5	19.6	 16
 30	 13	93.3	9.7	 16
 31	 13	424.8	70.4	 16
 32	 13	119.5	17.2	 16
 33	 13	180.8	23.7	 16
 34	 13	476.0	73.4	 16
 35	 13	222.3	33.4	 16
 36	 13	147.0	24.1	 16
 37	 13	343.0	46.9	 16
 38	 13	176.5	25.8	 16
 39	 13	222.5	38.9	 16
 40	 13	131.5	20.2	 16
 41	 13	193.0	29.1	 16
 42	 13	136.5	15.0	 16
 43	 13	122.0	17.2	 16
 44	 13	118.5	11.5	 16
 45	 13	184.5	26.5	 16
 46	 13	433.3	51.3	 16
 47	 13	1573.3	92.1	 16
 48	 13	225.5	30.8	 16
 49	 13	121.3	14.0	 16
 50	 13	119.3	14.7	 16
 51	 13	773.0	84.5	 16
 52	 13	144.3	22.4	 16
 53	 13	102.5	15.5	 16
 54	 13	108.0	19.7	 16
 55	 13	104.8	15.9	 16
 56	 13	97.5	16.7	 16
 57	 13	104.0	21.0	 16
 58	 13	114.0	22.3	 16
 59	 13	117.0	13.6	 16
 60	 13	128.3	19.5	 16
 61	 13	131.8	20.0	 16
 62	 13	178.8	27.0	 16
 63	 13	154.5	27.5	 16
 64	 13	1064.5	75.8	 16
 65	 13	241.3	36.5	 16
 66	 13	163.0	26.1	 16
 67	 13	173.3	21.0	 16
 68	 13	230.3	28.9	 16
 69	 13	130.3	18.4	 16
 70	 13	110.0	18.6	 16
 71	 13	222.8	34.4	 16
 72	 13	97.0	11.9	 16
 73	 13	89.5	13.0	 16
 74	 13	184.3	22.4	 16
 75	 13	102.8	13.4	 16
 76	 13	119.8	18.5	 16
 77	 13	1109.3	132.2	 16
 78	 13	183.0	25.4	 16
 79	 13	104.0	14.0	 16
 80	 13	193.8	37.5	 16
 81	 13	113.5	22.0	 16
 82	 13	187.0	26.6	 16
 83	 13	136.5	17.3	 16
 84	 13	94.3	16.6	 16
 85	 13	105.8	14.8	 16
 86	 13	226.0	30.5	 16
 87	 13	135.8	28.9	 16
 88	 13	405.5	46.4	 16
 89	 13	581.8	41.8	 16
 90	 13	177.0	23.8	 16
 91	 13	479.5	45.6	 16
 92	 13	108.5	10.7	 16
 93	 13	119.0	17.0	 16
 94	 13	180.3	14.2	 16
 95	 13	120.5	14.5	 16
 96	 13	99.5	13.7	 16
 97	 13	91.5	13.0	 16
 98	 13	87.5	10.0	 16
 99	 13	120.8	18.2	 16
100	 13	109.3	13.2	 16
101	 13	420.8	57.7	 16
102	 13	104.8	20.1	 16
103	 13	131.5	15.5	 16
104	 13	105.8	18.2	 16
105	 13	95.5	11.7	 16
106	 13	301.5	40.7	 16
107	 13	107.5	14.0	 16
108	 13	132.5	33.1	 16
109	 13	105.8	14.2	 16
110	 13	138.3	22.7	 16
111	 13	190.8	25.4	 16
112	 13	235.3	34.2	 16
113	 13	166.0	19.8	 16
114	 13	110.3	22.1	 16
115	 13	144.8	20.8	 16
116	 13	128.0	18.2	 16
117	 13	144.0	50.1	 16
118	 13	113.3	17.2	 16
119	 13	140.0	17.0	 16
120	 13	326.5	73.6	 16
121	 13	165.3	23.0	 16
122	 13	103.0	13.5	 16
123	 13	156.0	22.1	 16
124	 13	194.0	24.6	 16
125	 13	108.0	11.7	 20
126	 13	622.8	123.9	 16
127	 13	109.8	14.0	 16
128	 13	108.3	16.5	 16
129	 13	267.3	44.9	 16
130	 13	109.8	14.7	 16
131	 13	206.3	20.3	 16
132	 13	194.8	28.4	 16
133	 13	227.5	30.2	 16
134	 13	1055.0	126.7	 16
135	 13	140.0	16.9	 16
136	 13	132.3	22.5	 16
137	 13	140.8	19.4	 16
138	 13	183.3	20.5	 16
139	 13	154.3	21.9	 16
140	 13	102.3	12.2	 16
141	 13	92.0	13.5	 16
142	 13	265.0	38.7	 16
143	 13	126.0	20.2	 16
144	 13	217.0	28.1	 16
145	 13	240.3	27.2	 16
146	 13	676.8	68.0	 16
147	 13	92.5	12.6	 16
148	 13	425.0	34.9	 16
149	 13	182.5	24.9	 16
150	 13	151.8	20.2	 16
151	 13	81.8	9.2	 16
152	 13	105.8	20.9	 16
153	 13	3416.5	734.6	 16
154	 13	195.3	28.4	 16
155	 13	141.5	41.1	 16
156	 13	123.0	14.8	 16
157	 13	118.3	17.5	 16
158	 13	160.3	18.8	 16
159	 13	170.5	22.2	 16
160	 13	104.5	18.9	 16
161	 13	141.5	20.0	 16
162	 13	92.5	11.6	 16
163	 13	101.3	15.6	 16
164	 13	165.3	19.3	 16
165	 13	195.8	28.4	 16
166	 13	118.5	17.2	 16
167	 13	133.5	21.0	 16
168	 13	110.3	19.6	 16
169	 13	111.0	20.6	 16
170	 13	104.3	12.8	 16
171	 13	86.3	9.9	 16
172	 13	148.8	24.4	 16
173	 13	106.8	20.6	 16
174	 13	126.0	17.9	 16
175	 13	138.8	16.7	 16
176	 13	120.8	29.4	 16
177	 13	112.8	22.6	 16
178	 13	178.8	20.0	 16
179	 13	109.3	15.7	 16
180	 13	215.3	35.0	 16
181	 13	177.5	23.8	 16
182	 13	210.5	29.7	 16
183	 13	93.8	13.4	 16
184	 13	117.8	18.1	 16
185	 13	89.3	14.5	 16
186	 13	606.3	92.9	 16
187	 13	238.3	27.1	 16
188	 13	169.5	21.5	 16
189	 13	118.0	17.1	 16
190	 13	148.3	21.5	 16
191	 13	134.5	23.2	 16
192	 13	147.0	21.2	 16
193	 13	163.8	20.7	 16
194	 13	124.0	15.0	 16
195	 13	176.5	23.2	 16
196	 13	122.0	20.3	 16
197	 13	95.5	21.0	 16
198	 13	145.5	22.6	 16
199	 13	111.3	14.2	 16
200	 13	204.8	36.7	 16
201	 13	100.0	14.1	 16
202	 13	145.3	27.2	 16
203	 13	112.8	14.1	 16
204	 13	102.8	16.6	 16
205	 13	97.8	13.5	 16
206	 13	105.0	14.3	 16
207	 13	82.0	12.1	 16
208	 13	91.0	14.1	 16
209	 13	90.8	11.1	 16
210	 13	104.3	16.3	 16
211	 13	113.3	14.6	 16
212	 13	866.5	85.8	 16
213	 13	153.5	20.1	 16
214	 13	96.3	11.0	 16
215	 13	112.0	13.5	 16
216	 13	106.3	20.1	 16
217	 13	95.0	15.1	 16
218	 13	90.3	16.4	 16
219	 13	83.3	15.2	 16
220	 13	187.5	28.8	 16
221	 13	185.3	23.8	 16
222	 13	163.0	24.4	 16
223	 13	283.0	42.6	 16
224	 13	97.8	10.0	 16
225	 13	86.3	16.1	 16
226	 13	108.3	17.8	 16
227	 13	119.8	20.4	 16
228	 13	136.5	17.8	 16
229	 13	114.3	14.8	 16
230	 13	96.8	12.5	 16
231	 13	238.0	30.8	 16
232	 13	242.5	24.5	 16
233	 13	248.3	25.8	 16
234	 13	108.5	15.6	 16
235	 13	471.8	38.5	 16
236	 13	295.8	21.5	 16
237	 13	2061.0	177.8	 16
238	 13	1945.3	130.5	 16
239	 13	568.5	58.8	 16
240	 13	209.3	28.6	 16
241	 13	1992.8	359.2	 16
242	 13	1688.5	261.2	 16
243	 13	153.0	26.9	 16
244	 13	137.0	21.1	 16
245	 13	80.8	15.2	 16
246	 13	134.8	17.6	 16
247	 13	131.0	21.5	 16
248	 13	122.0	19.6	 16
249	 13	104.3	12.0	 16
250	 13	99.3	15.8	 16
251	 13	93.3	11.7	 16
252	 13	84.5	12.4	 16
253	 13	91.3	14.9	 16
254	 13	91.8	10.5	 16
255	 13	100.5	13.2	 16
256	 13	312.0	57.7	 16
257	 13	101.3	17.5	 16
258	 13	130.5	19.8	 16
259	 13	98.8	25.2	 16
260	 13	74.3	12.6	 16
261	 13	104.0	17.6	 16
262	 13	99.8	14.9	 16
263	 13	204.0	24.3	 16
264	 13	102.0	13.0	 16
265	 13	126.5	20.6	 16
266	 13	150.5	27.6	 16
267	 13	160.3	27.8	 20
268	 13	89.3	14.3	 16
269	 13	242.3	34.4	 16
270	 13	143.0	23.2	 16
271	 13	103.0	18.7	 16
272	 13	115.3	19.4	 16
273	 13	93.8	16.7	 16
274	 13	94.8	13.0	 16
275	 13	98.0	16.0	 16
276	 13	902.5	52.8	 16
277	 13	137.0	18.2	 16
278	 13	150.3	24.7	 16
279	 13	91.5	12.1	 16
280	 13	84.0	15.7	 16
281	 13	94.8	18.5	 16
282	 13	102.3	13.9	 16
283	 13	136.0	18.1	 16
284	 13	76.8	9.7	 16
285	 13	108.3	17.2	 16
286	 13	428.5	44.5	 16
287	 13	157.3	20.5	 16
288	 13	86.5	17.5	 16
289	 13	115.0	19.1	 16
290	 13	142.5	18.7	 16
291	 13	78.3	14.8	 16
292	 13	166.8	23.1	 16
293	 13	91.8	12.8	 16
294	 13	150.8	19.1	 16
295	 13	203.5	29.9	 16
296	 13	171.3	18.7	 16
297	 13	147.0	23.8	 16
298	 13	228.0	21.9	 16
299	 13	233.5	32.8	 16
300	 13	152.3	19.4	 16
301	 13	137.8	24.2	 16
302	 13	145.8	22.3	 16
303	 13	141.3	26.7	 16
304	 13	299.3	46.7	 16
305	 13	151.0	24.1	 16
306	 13	272.5	20.7	 16
307	 13	119.8	18.0	 16
308	 13	117.3	20.7	 16
309	 13	321.3	25.6	 16
310	 13	213.3	27.6	 16
311	 13	212.3	26.5	 16
312	 13	90.5	10.2	 16
313	 13	110.0	11.5	 16
314	 13	101.0	16.6	 16
315	 13	84.5	14.0	 16
316	 13	129.8	19.2	 16
317	 13	151.0	18.0	 16
318	 13	89.0	13.1	 16
319	 13	104.3	16.3	 16
320	 13	120.5	17.3	 16
321	 13	130.8	21.9	 16
322	 13	137.3	19.5	 16
323	 13	667.3	64.1	 16
324	 13	113.5	22.0	 16
325	 13	182.3	24.4	 16
326	 13	149.0	31.3	 16
327	 13	147.5	17.6	 16
328	 13	106.0	15.8	 16
329	 13	267.5	34.4	 16
330	 13	217.0	30.7	 16
331	 13	252.5	30.3	 16
332	 13	126.0	18.3	 16
333	 13	160.8	20.4	 16
334	 13	101.8	13.5	 16
335	 13	81.3	10.8	 16
336	 13	87.3	14.6	 16
337	 13	82.8	13.7	 16
338	 13	125.3	19.7	 16
339	 13	198.0	27.4	 16
340	 13	242.0	42.5	 16
341	 13	1356.0	295.2	 16
342	 13	114.8	17.8	 16
343	 13	80.3	10.8	 16
344	 13	74.5	10.1	 16
345	 13	119.0	22.4	 16
346	 13	222.0	24.5	 16
347	 13	84.3	14.4	 16
348	 13	139.3	17.7	 16
349	 13	776.3	115.6	 16
350	 13	1414.5	182.7	 16
351	 13	175.0	21.2	 16
352	 13	134.0	18.6	 16
353	 13	1031.3	175.2	 16
354	 13	283.8	35.1	 16
355	 13	311.8	37.2	 16
356	 13	195.0	29.4	 16
357	 13	172.3	27.2	 16
358	 13	121.5	21.2	 16
359	 13	91.5	21.3	 16
360	 13	104.5	12.4	 16
361	 13	294.3	54.3	 16
362	 13	116.5	20.8	 16
363	 13	73.3	9.6	 16
364	 13	90.5	9.8	 16
365	 13	83.0	14.5	 16
366	 13	88.5	11.3	 16
367	 13	362.0	67.3	 16
368	 13	73.8	9.1	 16
369	 13	101.3	13.5	 16
370	 13	269.5	28.9	 16
371	 13	317.3	29.8	 16
372	 13	253.0	31.6	 16
373	 13	126.5	21.1	 16
374	 13	77.3	10.2	 16
375	 13	209.5	32.0	 16
376	 13	152.3	21.6	 16
377	 13	168.0	25.3	 16
378	 13	98.3	16.5	 16
379	 13	204.5	21.9	 16
380	 13	196.0	23.8	 16
381	 13	80.8	13.5	 16
382	 13	114.8	17.7	 16
383	 13	133.3	20.5	 16
384	 13	289.8	38.1	 16
385	 13	103.3	14.7	 16
386	 13	99.8	14.6	 16
387	 13	103.8	17.2	 16
388	 13	115.3	19.1	 16
389	 13	84.8	12.0	 16
390	 13	129.5	21.0	 16
391	 13	127.8	18.4	 16
392	 13	92.5	17.0	 16
393	 13	91.5	20.2	 16
394	 13	362.8	46.6	 16
395	 13	103.5	17.3	 16
396	 13	226.3	21.6	 16
397	 13	183.5	21.2	 16
398	 13	136.3	21.3	 16
399	 13	111.3	16.0	 16
400	 13	375.5	64.6	 16
401	 13	203.3	22.7	 16
402	 13	143.8	21.2	 16
403	 13	89.0	14.0	 16
404	 13	100.5	24.2	 16
405	 13	77.8	13.6	 16
406	 13	205.0	28.5	 16
407	 13	178.0	22.1	 16
408	 13	90.5	16.6	 16
409	 13	110.3	18.5	 20
410	 13	220.5	39.6	 16
411	 13	108.3	14.5	 16
412	 13	128.3	24.8	 16
413	 13	416.5	45.9	 16
414	 13	304.3	61.1	 16
415	 13	245.5	28.7	 16
416	 13	125.3	20.5	 16
417	 13	157.3	24.4	 16
418	 13	177.3	23.0	 16
419	 13	137.5	18.8	 16
420	 13	109.8	16.3	 16
421	 13	93.3	16.4	 16
422	 13	132.8	20.7	 16
423	 13	113.3	15.3	 16
424	 13	146.3	13.4	 16
425	 13	106.5	21.7	 16
426	 13	81.5	18.7	 16
427	 13	362.0	43.7	 16
428	 13	108.0	18.4	 16
429	 13	170.8	23.6	 16
430	 13	98.3	15.7	 16
431	 13	170.5	19.7	 16
432	 13	294.0	42.1	 16
433	 13	640.3	137.4	 16
434	 13	754.0	144.7	 16
435	 13	122.0	17.9	 16
436	 13	88.5	15.2	 16
437	 13	165.8	25.1	 16
438	 13	169.0	43.6	 16
439	 13	1751.8	192.7	 16
440	 13	109.3	13.5	 16
441	 13	144.5	17.7	 16
442	 13	155.0	20.0	 16
443	 13	109.8	14.9	 16
444	 13	116.0	14.6	 16
445	 13	87.3	13.0	 16
446	 13	131.5	16.5	 16
447	 13	93.5	17.0	 16
448	 13	80.5	13.7	 16
449	 13	63.5	10.4	 16
450	 13	80.8	14.4	 16
451	 13	78.0	12.4	 16
452	 13	74.0	10.8	 16
453	 13	98.0	14.2	 16
454	 13	94.3	10.7	 16
455	 13	170.8	30.3	 16
456	 13	82.5	15.2	 16
457	 13	105.8	10.6	 16
458	 13	144.5	20.8	 16
459	 13	102.5	8.3	 16
460	 13	111.0	13.0	 16
461	 13	185.3	22.9	 16
462	 13	766.8	131.3	 16
463	 13	157.0	24.9	 16
464	 13	96.0	12.0	 16
465	 13	221.8	29.1	 16
466	 13	195.5	24.7	 16
467	 13	138.0	17.0	 16
468	 13	73.5	13.0	 16
469	 13	111.0	19.5	 16
470	 13	100.8	16.0	 16
471	 13	182.3	20.9	 16
472	 13	87.3	11.9	 16
473	 13	205.0	25.5	 16
474	 13	181.3	33.9	 16
475	 13	88.3	16.6	 16
476	 13	102.3	16.1	 16
477	 13	101.3	14.1	 16
478	 13	74.0	10.2	 16
479	 13	91.0	13.5	 16
480	 13	10811.8	1447.6	 16
481	 13	255.5	39.8	 16
482	 13	157.0	25.0	 16
483	 13	81.5	12.5	 16
484	 13	73.3	10.4	 16
485	 13	241.0	31.3	 16
486	 13	264.0	41.1	 16
487	 13	253.5	38.5	 16
488	 13	119.5	20.1	 16
489	 13	122.3	19.9	 16
490	 13	91.3	13.9	 16
491	 13	82.0	14.9	 16
492	 13	85.0	13.9	 16
493	 13	72.3	13.9	 16
494	 13	101.3	19.3	 16
495	 13	120.0	12.7	 16
496	 13	108.3	21.2	 16
497	 13	165.8	21.4	 16
498	 13	87.3	14.8	 16
499	 13	166.8	24.6	 16
500	 13	155.5	19.9	 16
501	 13	84.0	11.0	 16
502	 13	128.5	23.0	 16
503	 13	97.3	9.1	 16
504	 13	105.5	13.3	 16
505	 13	69.0	11.0	 16
506	 13	150.5	25.8	 16
507	 13	128.0	20.7	 16
508	 13	570.0	141.7	 16
509	 13	244.8	43.7	 16
510	 13	107.3	19.8	 16
511	 13	173.5	24.2	 16
512	 13	149.3	20.6	 16
513	 13	151.3	20.5	 16
514	 13	235.3	22.7	 16
515	 13	261.3	29.7	 16
516	 13	186.8	24.7	 16
517	 13	125.8	19.5	 16
518	 13	102.8	17.2	 16
519	 13	132.0	18.8	 16
520	 13	127.0	19.4	 16
521	 13	103.0	17.2	 16
522	 13	172.5	25.5	 16
523	 13	171.0	23.3	 16
524	 13	187.5	18.6	 16
525	 13	81.0	15.2	 16
526	 13	106.0	13.6	 16
527	 13	186.8	27.5	 16
528	 13	252.0	30.9	 16
529	 13	194.5	33.0	 16
530	 13	142.3	29.3	 16
531	 13	89.0	13.6	 16
532	 13	139.5	26.3	 16
533	 13	111.0	20.1	 16
534	 13	96.8	12.6	 16
535	 13	345.5	65.3	 16
536	 13	99.3	20.2	 16
537	 13	144.8	19.2	 16
538	 13	160.3	17.9	 16
539	 13	155.3	26.5	 16
540	 13	142.8	24.6	 16
541	 13	195.3	17.6	 16
542	 13	86.3	13.5	 16
543	 13	130.0	20.1	 16
544	 13	86.5	10.4	 16
545	 13	150.5	28.1	 16
546	 13	266.0	72.9	 16
547	 13	666.0	145.6	 16
548	 13	399.5	50.0	 16
549	 13	192.3	31.7	 16
550	 13	99.0	15.8	 16
551	 13	115.0	19.6	 16
552	 13	83.0	12.6	 20
553	 13	2036.5	544.5	 16
554	 13	81.3	12.8	 16
555	 13	75.3	17.1	 16
556	 13	294.8	63.9	 16
557	 13	94.3	13.5	 16
558	 13	98.5	15.3	 16
559	 13	136.0	22.2	 16
560	 13	109.3	10.9	 16
561	 13	101.0	15.5	 16
562	 13	164.8	30.0	 16
563	 13	713.8	112.8	 16
564	 13	149.0	15.6	 16
565	 13	110.3	17.2	 16
566	 13	192.0	23.0	 16
567	 13	300.3	30.0	 16
568	 13	203.5	19.9	 16
569	 13	172.3	29.6	 16
570	 13	85.0	8.7	 16
571	 13	69.3	11.1	 16
572	 13	104.3	13.1	 16
573	 13	121.8	20.4	 16
574	 13	160.5	20.5	 16
575	 13	261.0	32.6	 16
576	 13	192.3	36.0	 16
577	 13	121.3	19.2	 16
578	 13	268.3	27.9	 16
579	 13	431.3	79.3	 16
580	 13	167.3	23.6	 16
581	 13	165.3	19.5	 16
582	 13	140.3	18.1	 16
583	 13	112.3	14.6	 16
584	 13	376.8	50.6	 16
585	 13	146.5	18.9	 16
586	 13	159.0	12.7	 16
587	 13	206.0	16.5	 16
588	 13	80.5	11.4	 16
589	 13	99.3	14.2	 16
590	 13	98.3	12.7	 16
591	 13	267.3	42.0	 16
592	 13	428.8	63.1	 16
593	 13	123.0	18.9	 16
594	 13	232.5	32.9	 16
595	 13	292.0	36.5	 16
596	 13	114.3	23.3	 16
597	 13	871.5	116.1	 16
598	 13	188.8	27.7	 16
599	 13	125.3	16.6	 16
600	 13	141.3	22.3	 16
601	 13	160.5	20.3	 16
602	 13	216.3	26.3	 16
603	 13	93.5	16.6	 16
604	 13	107.3	13.2	 16
605	 13	186.3	25.7	 16
606	 13	201.8	32.6	 16
607	 13	83.3	18.9	 16
608	 13	95.3	15.0	 16
609	 13	101.0	13.9	 16
610	 13	65.0	18.1	 16
611	 13	81.3	13.5	 16
612	 13	120.0	13.4	 16
613	 13	134.0	26.3	 16
614	 13	137.0	21.8	 16
615	 13	190.5	24.8	 16
616	 13	280.0	30.4	 16
617	 13	141.0	21.9	 16
618	 13	114.0	14.2	 16
619	 13	227.8	23.1	 16
620	 13	78.5	15.4	 16
621	 13	85.8	21.2	 16
622	 13	112.8	17.7	 16
623	 13	118.0	12.5	 16
624	 13	108.5	10.3	 16
625	 13	93.3	8.8	 16
626	 13	83.3	9.5	 16
627	 13	78.0	14.1	 16
628	 13	99.3	19.7	 16
629	 13	81.8	26.0	 16
630	 13	777.8	77.8	 16
631	 13	913.3	76.9	 16
632	 13	176.5	22.8	 16
633	 13	254.5	41.1	 16
634	 13	549.3	48.0	 16
635	 13	257.8	38.6	 16
636	 13	367.5	51.4	 16
637	 13	64.8	13.5	 16
638	 13	365.8	59.2	 16
639	 13	134.5	18.1	 16
640	 13	125.0	11.9	 16
641	 13	200.0	30.1	 16
642	 13	151.0	25.5	 16
643	 13	116.8	18.0	 16
644	 13	109.0	21.6	 16
645	 13	139.3	17.6	 16
646	 13	124.5	20.9	 16
647	 13	225.3	26.1	 16
648	 13	92.0	17.3	 16
649	 13	78.8	10.9	 16
650	 13	99.5	11.9	 16
651	 13	81.0	14.7	 16
652	 13	261.3	37.7	 16
653	 13	97.3	17.3	 16
654	 13	96.3	13.0	 16
655	 13	79.8	14.8	 16
656	 13	79.0	15.8	 16
657	 13	101.5	16.8	 16
658	 13	363.0	45.3	 16
659	 13	370.0	54.2	 16
660	 13	693.0	143.3	 16
661	 13	168.0	17.2	 16
662	 13	156.3	25.4	 16
663	 13	227.3	33.2	 16
664	 13	636.5	162.3	 16
665	 13	152.0	26.4	 16
666	 13	651.3	134.7	 16
667	 13	86.5	17.3	 16
668	 13	352.8	75.6	 16
669	 13	80.0	8.7	 16
670	 13	101.8	21.1	 16
671	 13	75.0	12.6	 16
672	 13	78.5	13.6	 16
673	 13	117.0	20.0	 16
674	 13	65.0	8.5	 16
675	 13	78.3	12.6	 16
676	 13	115.8	17.3	 16
677	 13	165.5	25.3	 16
678	 13	91.3	12.7	 16
679	 13	111.8	14.6	 16
680	 13	303.0	44.9	 16
681	 13	91.0	12.7	 16
682	 13	139.0	24.6	 16
683	 13	116.0	20.0	 16
684	 13	140.5	20.3	 16
685	 13	125.3	19.8	 16
686	 13	77.0	12.5	 16
687	 13	75.3	12.6	 16
688	 13	99.3	15.8	 16
689	 13	441.3	75.4	 16
690	 13	99.0	11.7	 16
691	 13	185.5	46.8	 16
692	 13	255.5	33.2	 16
693	 13	302.8	29.7	 16
694	 13	110.8	21.3	 20
695	 13	118.3	23.9	 16
696	 13	117.5	16.6	 16
697	 13	89.3	16.2	 16
698	 13	1104.0	261.3	 16
699	 13	192.3	22.6	 16
700	 13	142.0	19.2	 16
701	 13	202.3	19.0	 16
702	 13	951.8	81.2	 16
703	 13	188.5	24.0	 16
704	 13	149.0	23.5	 16
705	 13	138.3	26.3	 16
706	 13	138.0	24.4	 16
707	 13	555.3	51.1	 16
708	 13	168.0	21.3	 16
709	 13	140.8	17.1	 16
710	 13	615.8	58.8	 16
711	 13	155.0	19.2	 16
  0	 14	5819.5	377.3	 16
  1	 14	213.8	27.6	 16
  2	 14	117.3	15.7	 16
  3	 14	90.0	10.9	 16
  4	 14	141.3	17.2	 16
  5	 14	136.3	19.9	 16
  6	 14	111.0	23.6	 16
  7	 14	120.8	20.9	 16
  8	 14	245.0	28.7	 16
  9	 14	181.8	23.4	 16
 10	 14	123.0	14.7	 16
 11	 14	113.5	13.4	 16
 12	 14	109.3	13.5	 16
 13	 14	133.5	20.0	 16
 14	 14	123.5	18.1	 16
 15	 14	226.3	19.7	 16
 16	 14	252.8	37.7	 16
 17	 14	119.3	21.6	 16
 18	 14	109.0	18.9	 16
 19	 14	104.5	10.9	 16
 20	 14	146.5	23.4	 16
 21	 14	106.8	11.7	 16
 22	 14	114.0	14.0	 16
 23	 14	91.5	14.5	 16
 24	 14	96.5	12.2	 16
 25	 14	111.5	13.4	 16
 26	 14	109.5	15.9	 16
 27	 14	120.0	13.2	 16
 28	 14	101.8	17.7	 16
 29	 14	110.5	19.3	 16
 30	 14	102.8	12.9	 16
 31	 14	138.5	20.8	 16
 32	 14	143.5	22.0	 16
 33	 14	109.5	22.5	 16
 34	 14	122.8	21.8	 16
 35	 14	112.3	14.0	 16
 36	 14	139.3	17.0	 16
 37	 14	134.0	19.1	 16
 38	 14	138.0	19.6	 16
 39	 14	166.0	16.9	 16
 40	 14	114.0	12.6	 16
 41	 14	250.3	32.7	 16
 42	 14	106.5	13.6	 16
 43	 14	111.3	13.6	 16
 44	 14	111.3	19.0	 16
 45	 14	216.5	24.9	 16
 46	 14	213.3	22.6	 16
 47	 14	663.8	57.9	 16
 48	 14	243.3	29.9	 16
 49	 14	115.3	24.8	 16
 50	 14	136.0	17.6	 16
 51	 14	265.8	26.6	 16
 52	 14	131.3	16.2	 16
 53	 14	90.3	12.7	 16
 54	 14	103.0	15.1	 16
 55	 14	119.8	23.9	 16
 56	 14	91.3	12.5	 16
 57	 14	115.3	15.4	 16
 58	 14	102.0	19.9	 16
 59	 14	110.5	12.7	 16
 60	 14	119.3	22.9	 16
 61	 14	128.0	20.1	 16
 62	 14	182.0	22.5	 16
 63	 14	190.5	39.1	 16
 64	 14	200.5	22.2	 16
 65	 14	113.3	18.2	 16
 66	 14	123.0	15.3	 16
 67	 14	116.0	14.1	 16
 68	 14	115.3	16.0	 16
 69	 14	95.3	15.3	 16
 70	 14	108.5	14.8	 16
 71	 14	114.5	14.9	 16
 72	 14	93.3	16.6	 16
 73	 14	101.0	12.5	 16
 74	 14	94.3	15.8	 16
 75	 14	110.0	12.7	 16
 76	 14	109.3	15.8	 16
 77	 14	277.5	37.7	 16
 78	 14	108.5	15.2	 16
 79	 14	105.8	16.3	 16
 80	 14	126.8	18.5	 16
 81	 14	127.5	14.7	 16
 82	 14	121.5	19.3	 16
 83	 14	108.3	17.1	 16
 84	 14	77.8	11.4	 16
 85	 14	88.0	8.1	 16
 86	 14	205.0	28.8	 16
 87	 14	130.0	21.4	 16
 88	 14	356.5	33.7	 16
 89	 14	506.0	36.8	 16
 90	 14	129.5	17.2	 16
 91	 14	389.8	31.3	 16
 92	 14	113.3	17.2	 16
 93	 14	119.3	17.2	 16
 94	 14	236.3	33.4	 16
 95	 14	137.0	19.1	 16
 96	 14	100.0	11.7	 16
 97	 14	102.0	13.8	 16
 98	 14	103.3	17.0	 16
 99	 14	113.0	20.4	 16
100	 14	109.3	17.8	 16
101	 14	196.3	23.5	 16
102	 14	114.0	17.8	 16
103	 14	108.8	19.2	 16
104	 14	112.3	16.2	 16
105	 14	86.5	8.3	 16
106	 14	184.5	29.5	 16
107	 14	117.3	16.6	 16
108	 14	106.5	19.2	 16
109	 14	106.5	16.6	 16
110	 14	165.0	95.2	 16
111	 14	134.3	18.1	 16
112	 14	156.5	20.7	 16
113	 14	160.5	27.6	 16
114	 14	128.8	25.8	 16
115	 14	129.0	19.5	 16
116	 14	121.0	17.7	 16
117	 14	109.8	17.6	 16
118	 14	112.3	12.0	 16
119	 14	165.3	24.2	 16
120	 14	136.5	21.8	 16
121	 14	120.0	16.6	 16
122	 14	100.0	13.2	 16
123	 14	127.0	19.3	 16
124	 14	114.0	15.6	 16
125	 14	137.0	19.5	 16
126	 14	168.0	24.1	 16
127	 14	128.0	22.5	 16
128	 14	109.3	15.5	 16
129	 14	203.3	20.5	 20
130	 14	104.0	15.4	 16
131	 14	104.5	18.7	 16
132	 14	101.0	16.4	 16
133	 14	128.8	19.1	 16
134	 14	186.0	24.8	 16
135	 14	130.0	22.9	 16
136	 14	139.3	17.4	 16
137	 14	93.0	18.7	 16
138	 14	347.0	30.9	 16
139	 14	130.5	14.8	 16
140	 14	93.3	12.5	 16
141	 14	76.5	8.0	 16
142	 14	90.3	15.3	 16
143	 14	116.3	15.9	 16
144	 14	112.5	14.0	 16
145	 14	189.3	21.2	 16
146	 14	292.0	30.8	 16
147	 14	100.0	42.3	 16
148	 14	213.8	21.8	 16
149	 14	195.5	29.3	 16
150	 14	149.0	24.9	 16
151	 14	106.3	102.4	 16
152	 14	86.5	11.7	 16
153	 14	1126.8	148.7	 16
154	 14	111.0	15.9	 16
155	 14	112.8	16.8	 16
156	 14	114.0	12.0	 16
157	 14	123.0	14.8	 16
158	 14	210.3	21.5	 16
159	 14	144.3	17.2	 16
160	 14	90.5	13.5	 16
161	 14	107.5	20.2	 16
162	 14	113.8	15.1	 16
163	 14	99.3	15.6	 16
164	 14	145.3	21.2	 16
165	 14	105.3	13.2	 16
166	 14	136.5	22.2	 16
167	 14	120.3	14.5	 16
168	 14	117.0	15.1	 16
169	 14	85.3	10.4	 16
170	 14	101.0	18.5	 16
171	 14	87.0	10.7	 16
172	 14	106.8	15.2	 16
173	 14	105.3	17.7	 16
174	 14	107.5	17.0	 16
175	 14	122.0	15.4	 16
176	 14	122.3	18.9	 16
177	 14	130.5	16.2	 16
178	 14	111.3	13.9	 16
179	 14	116.0	17.0	 16
180	 14	151.0	14.8	 16
181	 14	166.0	20.8	 16
182	 14	272.8	37.8	 16
183	 14	102.0	13.7	 16
184	 14	106.0	14.0	 16
185	 14	93.8	11.9	 16
186	 14	181.0	24.8	 16
187	 14	113.8	15.1	 16
188	 14	133.3	22.8	 16
189	 14	159.5	21.6	 16
190	 14	105.0	12.8	 16
191	 14	134.3	22.6	 16
192	 14	106.0	8.1	 16
193	 14	145.5	23.5	 16
194	 14	158.3	25.9	 16
195	 14	120.0	12.9	 16
196	 14	150.3	18.4	 16
197	 14	81.5	18.0	 16
198	 14	97.5	16.3	 16
199	 14	112.3	15.1	 16
200	 14	130.5	16.2	 16
201	 14	80.3	11.5	 16
202	 14	91.0	12.1	 16
203	 14	112.0	15.1	 16
204	 14	95.0	19.1	 16
205	 14	106.3	12.5	 16
206	 14	87.3	16.5	 16
207	 14	77.8	13.4	 16
208	 14	77.8	9.4	 16
209	 14	91.8	12.5	 16
210	 14	107.0	15.4	 16
211	 14	89.5	9.7	 16
212	 14	288.5	40.4	 16
213	 14	113.0	20.9	 16
214	 14	90.8	9.9	 16
215	 14	109.3	16.3	 16
216	 14	94.3	18.1	 16
217	 14	80.0	17.5	 16
218	 14	79.3	12.8	 16
219	 14	83.5	13.5	 16
220	 14	127.0	14.8	 16
221	 14	148.8	24.2	 16
222	 14	148.5	28.6	 16
223	 14	297.5	33.3	 16
224	 14	122.0	22.7	 16
225	 14	104.3	20.9	 16
226	 14	124.3	23.7	 16
227	 14	100.3	12.6	 16
228	 14	127.0	21.6	 16
229	 14	132.5	22.9	 16
230	 14	84.0	14.4	 16
231	 14	190.0	20.9	 16
232	 14	198.3	29.2	 16
233	 14	302.5	31.0	 16
234	 14	163.3	28.0	 16
235	 14	406.3	38.8	 16
236	 14	246.5	51.5	 16
237	 14	4134.3	225.0	 16
238	 14	3870.3	157.9	 16
239	 14	547.3	75.9	 16
240	 14	122.3	15.2	 16
241	 14	485.3	97.3	 16
242	 14	426.8	58.8	 16
243	 14	101.8	10.7	 16
244	 14	103.3	15.6	 16
245	 14	93.5	20.1	 16
246	 14	100.3	18.1	 16
247	 14	97.8	15.0	 16
248	 14	93.3	13.1	 16
249	 14	100.5	28.8	 16
250	 14	98.0	17.1	 16
251	 14	78.3	14.2	 16
252	 14	81.3	9.0	 16
253	 14	93.5	12.8	 16
254	 14	93.0	12.8	 16
255	 14	92.3	16.8	 16
256	 14	141.0	13.9	 16
257	 14	111.8	16.4	 16
258	 14	124.3	19.8	 16
259	 14	94.8	16.3	 16
260	 14	73.0	7.5	 16
261	 14	84.8	14.7	 16
262	 14	92.5	12.3	 16
263	 14	130.0	22.3	 16
264	 14	111.0	18.6	 16
265	 14	102.5	14.4	 16
266	 14	104.0	15.6	 16
267	 14	250.3	31.4	 16
268	 14	87.8	10.9	 16
269	 14	196.5	25.7	 16
270	 14	105.3	19.4	 16
271	 14	93.5	21.2	 20
272	 14	104.5	18.4	 16
273	 14	88.8	11.9	 16
274	 14	76.5	12.3	 16
275	 14	87.3	13.3	 16
276	 14	133.5	19.5	 16
277	 14	90.5	14.9	 16
278	 14	90.8	11.7	 16
279	 14	91.8	14.0	 16
280	 14	86.3	10.9	 16
281	 14	83.5	12.7	 16
282	 14	124.0	18.2	 16
283	 14	191.0	25.9	 16
284	 14	76.0	11.2	 16
285	 14	107.8	20.0	 16
286	 14	286.5	25.1	 16
287	 14	89.3	22.0	 16
288	 14	78.3	10.4	 16
289	 14	117.3	12.5	 16
290	 14	71.5	10.7	 16
291	 14	65.5	12.4	 16
292	 14	99.3	16.7	 16
293	 14	97.3	16.1	 16
294	 14	117.0	29.7	 16
295	 14	173.3	24.1	 16
296	 14	176.3	24.4	 16
297	 14	88.3	11.0	 16
298	 14	120.5	19.7	 16
299	 14	145.8	24.2	 16
300	 14	103.3	13.7	 16
301	 14	152.3	21.8	 16
302	 14	102.3	16.8	 16
303	 14	90.0	16.5	 16
304	 14	128.5	13.9	 16
305	 14	87.8	13.8	 16
306	 14	102.3	14.9	 16
307	 14	161.0	27.3	 16
308	 14	104.3	17.5	 16
309	 14	202.3	25.1	 16
310	 14	158.8	21.9	 16
311	 14	176.0	28.7	 16
312	 14	89.8	14.8	 16
313	 14	83.8	17.7	 16
314	 14	85.8	13.9	 16
315	 14	80.0	12.2	 16
316	 14	112.8	15.9	 16
317	 14	119.0	16.7	 16
318	 14	97.8	16.3	 16
319	 14	105.8	13.2	 16
320	 14	111.3	14.0	 16
321	 14	131.5	15.8	 16
322	 14	111.8	17.0	 16
323	 14	186.8	20.2	 16
324	 14	116.3	14.0	 16
325	 14	337.3	36.7	 16
326	 14	105.0	15.0	 16
327	 14	111.8	14.1	 16
328	 14	120.5	15.8	 16
329	 14	117.3	12.7	 16
330	 14	109.3	10.9	 16
331	 14	135.5	15.6	 16
332	 14	97.3	10.6	 16
333	 14	102.0	17.0	 16
334	 14	96.0	15.9	 16
335	 14	84.5	16.7	 16
336	 14	86.0	10.1	 16
337	 14	79.0	13.4	 16
338	 14	91.8	11.8	 16
339	 14	266.8	29.5	 16
340	 14	207.8	20.2	 16
341	 14	156.3	35.2	 16
342	 14	82.5	17.4	 16
343	 14	78.3	12.9	 16
344	 14	80.5	11.7	 16
345	 14	82.3	12.1	 16
346	 14	111.5	10.6	 16
347	 14	93.8	14.4	 16
348	 14	92.8	13.6	 16
349	 14	130.3	19.9	 16
350	 14	226.3	22.2	 16
351	 14	161.3	21.8	 16
352	 14	95.3	23.9	 16
353	 14	216.0	35.0	 16
354	 14	95.3	15.0	 16
355	 14	142.0	15.3	 16
356	 14	266.5	35.0	 16
357	 14	241.0	29.4	 16
358	 14	146.3	20.3	 16
359	 14	91.5	12.0	 16
360	 14	73.0	13.8	 16
361	 14	193.8	31.1	 16
362	 14	107.5	15.3	 16
363	 14	75.3	14.2	 16
364	 14	91.0	14.7	 16
365	 14	83.3	14.1	 16
366	 14	95.0	16.6	 16
367	 14	127.0	19.5	 16
368	 14	83.5	14.5	 16
369	 14	88.0	18.0	 16
370	 14	247.3	33.4	 16
371	 14	202.3	31.8	 16
372	 14	256.3	32.0	 16
373	 14	145.3	26.5	 16
374	 14	74.5	10.6	 16
375	 14	138.3	18.6	 16
376	 14	99.5	12.3	 16
377	 14	216.5	24.6	 16
378	 14	113.5	12.4	 16
379	 14	135.3	14.5	 16
380	 14	149.3	14.9	 16
381	 14	81.0	11.7	 16
382	 14	114.8	17.1	 16
383	 14	132.0	18.8	 16
384	 14	146.8	27.6	 16
385	 14	107.0	16.7	 16
386	 14	92.8	15.1	 16
387	 14	113.5	13.6	 16
388	 14	118.8	19.6	 16
389	 14	99.5	14.6	 16
390	 14	102.5	16.4	 16
391	 14	100.8	18.2	 16
392	 14	93.0	18.4	 16
393	 14	89.8	13.6	 16
394	 14	403.3	57.1	 16
395	 14	97.0	17.3	 16
396	 14	166.5	18.0	 16
397	 14	203.0	27.1	 16
398	 14	137.0	16.8	 16
399	 14	118.8	21.1	 16
400	 14	121.3	15.0	 16
401	 14	99.5	17.7	 16
402	 14	119.0	18.8	 16
403	 14	102.3	14.1	 16
404	 14	96.0	17.9	 16
405	 14	85.3	14.5	 16
406	 14	236.0	37.0	 16
407	 14	224.3	37.1	 16
408	 14	81.8	13.8	 16
409	 14	82.8	11.7	 16
410	 14	90.0	14.6	 16
411	 14	111.0	19.1	 16
412	 14	115.3	16.4	 16
413	 14	137.5	19.9	 20
414	 14	114.3	19.7	 16
415	 14	143.5	26.1	 16
416	 14	83.3	14.0	 16
417	 14	106.3	15.6	 16
418	 14	135.3	16.0	 16
419	 14	102.0	16.2	 16
420	 14	111.8	14.7	 16
421	 14	98.8	16.3	 16
422	 14	111.0	28.1	 16
423	 14	116.8	12.1	 16
424	 14	126.0	25.0	 16
425	 14	105.0	14.3	 16
426	 14	83.5	16.3	 16
427	 14	116.3	22.9	 16
428	 14	122.5	19.7	 16
429	 14	127.8	16.2	 16
430	 14	85.8	11.6	 16
431	 14	167.5	85.7	 16
432	 14	136.5	27.5	 16
433	 14	168.5	23.5	 16
434	 14	169.8	18.6	 16
435	 14	103.0	18.9	 16
436	 14	84.8	10.6	 16
437	 14	98.0	18.0	 16
438	 14	228.8	22.3	 16
439	 14	145.8	15.4	 16
440	 14	87.8	16.2	 16
441	 14	94.0	15.7	 16
442	 14	122.0	18.2	 16
443	 14	86.0	9.7	 16
444	 14	93.3	14.3	 16
445	 14	84.5	15.8	 16
446	 14	92.8	16.1	 16
447	 14	80.0	9.9	 16
448	 14	75.3	9.9	 16
449	 14	70.3	11.4	 16
450	 14	80.3	26.5	 16
451	 14	67.0	12.8	 16
452	 14	88.5	13.3	 16
453	 14	79.0	10.3	 16
454	 14	105.3	16.9	 16
455	 14	94.0	14.9	 16
456	 14	82.3	9.7	 16
457	 14	85.0	11.2	 16
458	 14	142.0	17.6	 16
459	 14	91.5	11.6	 16
460	 14	89.0	11.6	 16
461	 14	117.3	21.5	 16
462	 14	184.0	38.3	 16
463	 14	86.3	18.6	 16
464	 14	88.0	19.1	 16
465	 14	97.0	13.9	 16
466	 14	94.0	14.7	 16
467	 14	93.0	17.0	 16
468	 14	79.3	11.0	 16
469	 14	66.8	11.8	 16
470	 14	138.8	26.9	 16
471	 14	111.0	22.5	 16
472	 14	90.0	15.0	 16
473	 14	97.0	11.6	 16
474	 14	146.0	19.2	 16
475	 14	92.3	17.4	 16
476	 14	87.0	16.5	 16
477	 14	72.5	9.5	 16
478	 14	82.5	12.1	 16
479	 14	88.0	10.7	 16
480	 14	5132.5	613.8	 16
481	 14	112.0	16.5	 16
482	 14	77.5	20.3	 16
483	 14	81.0	14.7	 16
484	 14	77.5	10.2	 16
485	 14	120.8	12.4	 16
486	 14	136.5	17.1	 16
487	 14	108.8	14.6	 16
488	 14	93.5	13.6	 16
489	 14	121.8	17.4	 16
490	 14	80.3	11.9	 16
491	 14	76.3	12.9	 16
492	 14	79.3	15.5	 16
493	 14	56.5	9.8	 16
494	 14	85.5	13.6	 16
495	 14	138.0	18.5	 16
496	 14	130.3	16.7	 16
497	 14	98.5	15.1	 16
498	 14	77.5	14.2	 16
499	 14	186.5	28.5	 16
500	 14	89.8	17.1	 16
501	 14	76.3	14.6	 16
502	 14	104.0	10.7	 16
503	 14	81.0	9.7	 16
504	 14	84.3	14.3	 16
505	 14	77.8	12.2	 16
506	 14	110.5	12.1	 16
507	 14	95.0	8.1	 16
508	 14	144.8	18.7	 16
509	 14	114.8	18.3	 16
510	 14	111.3	21.3	 16
511	 14	143.0	21.5	 16
512	 14	110.5	16.7	 16
513	 14	109.3	16.6	 16
514	 14	171.0	25.1	 16
515	 14	125.8	19.5	 16
516	 14	155.8	17.7	 16
517	 14	99.5	14.0	 16
518	 14	100.3	20.3	 16
519	 14	111.5	18.4	 16
520	 14	114.3	14.7	 16
521	 14	96.5	15.9	 16
522	 14	173.3	30.7	 16
523	 14	171.8	22.8	 16
524	 14	158.0	30.2	 16
525	 14	76.3	10.8	 16
526	 14	108.5	15.0	 16
527	 14	86.3	18.0	 16
528	 14	137.5	21.9	 16
529	 14	135.3	21.0	 16
530	 14	76.8	12.7	 16
531	 14	86.5	17.9	 16
532	 14	83.5	14.0	 16
533	 14	70.8	12.3	 16
534	 14	89.0	12.9	 16
535	 14	114.3	21.0	 16
536	 14	94.3	14.3	 16
537	 14	134.3	14.5	 16
538	 14	146.3	19.0	 16
539	 14	154.0	21.9	 16
540	 14	125.0	12.6	 16
541	 14	154.3	21.8	 16
542	 14	80.0	13.8	 16
543	 14	107.0	20.2	 16
544	 14	86.0	12.4	 16
545	 14	89.0	8.9	 16
546	 14	91.8	14.3	 16
547	 14	352.8	69.4	 16
548	 14	352.3	31.1	 16
549	 14	197.0	22.1	 16
550	 14	95.3	11.7	 16
551	 14	128.8	17.4	 16
552	 14	120.3	16.3	 16
553	 14	494.0	132.7	 16
554	 14	74.8	12.7	 16
555	 14	75.8	12.6	 16
556	 14	100.3	17.8	 20
557	 14	98.3	15.8	 16
558	 14	100.0	11.9	 16
559	 14	166.0	20.3	 16
560	 14	106.0	16.4	 16
561	 14	80.5	17.8	 16
562	 14	104.3	12.9	 16
563	 14	190.5	31.7	 16
564	 14	185.0	28.7	 16
565	 14	99.5	14.8	 16
566	 14	108.8	13.7	 16
567	 14	362.8	32.1	 16
568	 14	140.0	17.0	 16
569	 14	106.0	13.8	 16
570	 14	81.3	18.1	 16
571	 14	73.3	16.7	 16
572	 14	83.0	8.7	 16
573	 14	79.3	10.4	 16
574	 14	185.8	27.6	 16
575	 14	292.0	27.2	 16
576	 14	124.3	21.9	 16
577	 14	99.8	11.6	 16
578	 14	337.8	26.7	 16
579	 14	319.0	44.5	 16
580	 14	108.0	16.6	 16
581	 14	91.8	12.5	 16
582	 14	152.3	19.8	 16
583	 14	94.5	10.1	 16
584	 14	151.5	29.8	 16
585	 14	156.5	29.6	 16
586	 14	124.8	21.4	 16
587	 14	121.0	20.8	 16
588	 14	74.5	13.1	 16
589	 14	84.8	10.8	 16
590	 14	97.0	15.0	 16
591	 14	120.0	13.9	 16
592	 14	171.5	26.0	 16
593	 14	105.3	16.8	 16
594	 14	130.8	19.4	 16
595	 14	135.3	12.5	 16
596	 14	109.3	17.3	 16
597	 14	160.3	21.5	 16
598	 14	120.5	62.1	 16
599	 14	105.3	18.5	 16
600	 14	102.5	16.7	 16
601	 14	161.3	17.7	 16
602	 14	202.0	26.2	 16
603	 14	77.5	9.9	 16
604	 14	144.3	21.1	 16
605	 14	85.3	18.2	 16
606	 14	82.8	10.6	 16
607	 14	86.0	15.2	 16
608	 14	80.5	8.7	 16
609	 14	73.3	12.9	 16
610	 14	65.8	12.3	 16
611	 14	71.0	13.6	 16
612	 14	92.5	13.3	 16
613	 14	116.0	18.7	 16
614	 14	103.3	13.8	 16
615	 14	120.5	16.8	 16
616	 14	183.3	26.1	 16
617	 14	147.0	15.1	 16
618	 14	107.8	22.4	 16
619	 14	150.8	20.9	 16
620	 14	69.8	9.4	 16
621	 14	93.0	13.1	 16
622	 14	85.3	14.6	 16
623	 14	89.3	14.9	 16
624	 14	82.5	12.2	 16
625	 14	78.0	10.9	 16
626	 14	82.5	11.0	 16
627	 14	85.0	15.8	 16
628	 14	76.8	16.1	 16
629	 14	86.0	11.8	 16
630	 14	287.5	41.2	 16
631	 14	219.5	24.0	 16
632	 14	185.3	33.5	 16
633	 14	251.0	28.7	 16
634	 14	585.0	39.0	 16
635	 14	91.3	13.3	 16
636	 14	99.5	16.4	 16
637	 14	67.0	13.4	 16
638	 14	139.3	20.6	 16
639	 14	148.8	20.0	 16
640	 14	92.3	16.5	 16
641	 14	124.0	17.9	 16
642	 14	157.5	19.4	 16
643	 14	122.8	16.2	 16
644	 14	137.0	15.6	 16
645	 14	137.3	21.6	 16
646	 14	111.5	15.5	 16
647	 14	118.5	14.7	 16
648	 14	91.5	13.2	 16
649	 14	85.3	16.5	 16
650	 14	80.5	14.4	 16
651	 14	74.3	8.2	 16
652	 14	136.0	15.9	 16
653	 14	94.3	14.3	 16
654	 14	79.0	10.0	 16
655	 14	89.3	14.1	 16
656	 14	83.3	10.6	 16
657	 14	100.3	17.2	 16
658	 14	203.3	29.7	 16
659	 14	154.3	26.7	 16
660	 14	795.0	169.3	 16
661	 14	263.8	54.6	 16
662	 14	171.3	20.7	 16
663	 14	146.3	22.0	 16
664	 14	204.8	36.7	 16
665	 14	125.5	20.3	 16
666	 14	254.8	41.5	 16
667	 14	76.3	12.4	 16
668	 14	127.0	27.2	 16
669	 14	102.5	16.2	 16
670	 14	81.5	11.4	 16
671	 14	83.0	14.8	 16
672	 14	81.3	12.8	 16
673	 14	91.5	10.2	 16
674	 14	68.0	10.2	 16
675	 14	78.0	12.0	 16
676	 14	84.3	14.1	 16
677	 14	101.0	21.4	 16
678	 14	94.3	12.1	 16
679	 14	109.8	18.5	 16
680	 14	155.5	21.9	 16
681	 14	69.0	9.5	 16
682	 14	99.8	13.3	 16
683	 14	116.0	22.1	 16
684	 14	95.5	13.5	 16
685	 14	89.5	15.3	 16
686	 14	69.0	10.9	 16
687	 14	81.5	11.4	 16
688	 14	100.5	13.4	 16
689	 14	139.3	17.5	 16
690	 14	103.3	18.0	 16
691	 14	144.3	21.6	 16
692	 14	135.8	13.4	 16
693	 14	228.0	31.2	 16
694	 14	103.3	20.5	 16
695	 14	71.3	12.4	 16
696	 14	88.5	15.7	 16
697	 14	135.3	18.5	 16
698	 14	339.8	46.9	 20
699	 14	292.8	34.5	 16
700	 14	120.0	18.7	 16
701	 14	148.3	17.3	 16
702	 14	424.3	27.6	 16
703	 14	106.5	24.0	 16
704	 14	162.0	19.3	 16
705	 14	175.8	23.4	 16
706	 14	187.5	22.3	 16
707	 14	359.0	34.7	 16
708	 14	147.0	23.1	 16
709	 14	120.0	16.4	 16
710	 14	200.3	33.5	 16
711	 14	7668.5	447.5	 16
  0	 15	146.0	18.2	 16
  1	 15	161.8	18.2	 16
  2	 15	131.5	18.3	 16
  3	 15	110.0	16.4	 16
  4	 15	156.3	24.0	 16
  5	 15	112.0	18.6	 16
  6	 15	160.3	18.8	 16
  7	 15	259.5	50.1	 16
  8	 15	130.3	17.1	 16
  9	 15	174.3	26.5	 16
 10	 15	118.8	21.7	 16
 11	 15	121.0	17.2	 16
 12	 15	241.3	34.6	 16
 13	 15	113.8	18.5	 16
 14	 15	153.3	28.6	 16
 15	 15	163.0	69.4	 16
 16	 15	299.3	37.9	 16
 17	 15	251.8	33.1	 16
 18	 15	162.8	19.6	 16
 19	 15	316.3	38.1	 16
 20	 15	196.0	21.8	 16
 21	 15	110.8	20.5	 16
 22	 15	108.8	16.8	 16
 23	 15	159.8	18.9	 16
 24	 15	314.8	27.7	 16
 25	 15	200.3	29.2	 16
 26	 15	139.3	20.8	 16
 27	 15	112.3	13.3	 16
 28	 15	353.8	57.5	 16
 29	 15	634.5	67.5	 16
 30	 15	138.5	20.9	 16
 31	 15	247.8	27.7	 16
 32	 15	109.8	18.4	 16
 33	 15	708.0	119.7	 16
 34	 15	138.0	17.7	 16
 35	 15	179.5	28.6	 16
 36	 15	109.8	13.7	 16
 37	 15	140.8	16.3	 16
 38	 15	112.3	11.9	 16
 39	 15	106.0	11.9	 16
 40	 15	117.0	12.7	 16
 41	 15	150.0	22.7	 16
 42	 15	114.8	22.4	 16
 43	 15	167.0	25.0	 16
 44	 15	195.5	25.7	 16
 45	 15	227.3	24.5	 16
 46	 15	142.8	18.6	 16
 47	 15	137.0	26.3	 16
 48	 15	783.3	66.9	 16
 49	 15	251.8	30.3	 16
 50	 15	380.3	58.7	 16
 51	 15	197.5	23.4	 16
 52	 15	191.5	31.9	 16
 53	 15	149.3	22.1	 16
 54	 15	112.0	17.4	 16
 55	 15	144.5	22.5	 16
 56	 15	187.8	43.9	 16
 57	 15	167.0	23.3	 16
 58	 15	775.8	162.0	 16
 59	 15	316.3	41.2	 16
 60	 15	118.3	17.0	 16
 61	 15	150.5	18.8	 16
 62	 15	269.3	29.2	 16
 63	 15	91.3	13.6	 16
 64	 15	207.5	29.9	 16
 65	 15	146.8	16.7	 16
 66	 15	108.8	18.6	 16
 67	 15	127.5	20.4	 16
 68	 15	287.3	30.6	 16
 69	 15	157.5	27.0	 16
 70	 15	174.5	18.1	 16
 71	 15	169.0	22.7	 16
 72	 15	179.8	25.7	 16
 73	 15	251.5	34.8	 16
 74	 15	644.5	99.8	 16
 75	 15	92.3	16.0	 16
 76	 15	523.0	88.1	 16
 77	 15	147.0	27.6	 16
 78	 15	91.0	11.0	 16
 79	 15	158.5	29.1	 16
 80	 15	96.0	12.7	 16
 81	 15	200.0	23.9	 16
 82	 15	86.3	18.4	 16
 83	 15	122.0	12.5	 16
 84	 15	110.3	14.1	 16
 85	 15	336.5	45.8	 16
 86	 15	192.5	22.1	 16
 87	 15	140.5	15.5	 16
 88	 15	133.8	17.2	 16
 89	 15	249.0	26.1	 16
 90	 15	158.0	20.2	 16
 91	 15	228.8	30.2	 16
 92	 15	164.3	20.9	 16
 93	 15	175.3	23.8	 16
 94	 15	602.0	74.8	 16
 95	 15	387.8	46.0	 16
 96	 15	289.5	47.2	 16
 97	 15	96.0	14.5	 16
 98	 15	183.8	24.9	 16
 99	 15	119.8	18.8	 16
100	 15	115.5	20.9	 16
101	 15	2739.3	586.7	 16
102	 15	191.5	31.1	 16
103	 15	132.5	22.6	 16
104	 15	1315.5	301.2	 16
105	 15	281.5	45.9	 16
106	 15	110.3	21.8	 16
107	 15	97.5	15.4	 16
108	 15	169.0	21.8	 16
109	 15	138.0	16.8	 16
110	 15	138.5	40.1	 16
111	 15	192.8	20.3	 16
112	 15	215.5	30.4	 16
113	 15	134.5	16.5	 16
114	 15	206.5	25.1	 16
115	 15	284.3	25.6	 16
116	 15	263.0	25.1	 16
117	 15	136.0	17.5	 16
118	 15	306.0	37.8	 16
119	 15	117.5	20.2	 16
120	 15	155.3	28.9	 16
121	 15	215.5	23.6	 16
122	 15	109.5	20.8	 16
123	 15	153.3	22.7	 16
124	 15	155.0	20.2	 16
125	 15	118.8	19.2	 16
126	 15	227.3	33.6	 16
127	 15	88.0	16.8	 16
128	 15	124.5	21.8	 16
129	 15	93.3	13.1	 16
130	 15	119.0	18.4	 16
131	 15	456.5	64.5	 16
132	 15	181.0	17.9	 16
133	 15	102.0	15.0	 20
134	 15	155.5	19.7	 16
135	 15	97.3	13.2	 16
136	 15	119.3	18.7	 16
137	 15	1036.5	130.9	 16
138	 15	1043.3	162.8	 16
139	 15	180.3	22.3	 16
140	 15	129.0	20.4	 16
141	 15	119.3	17.5	 16
142	 15	103.3	13.1	 16
143	 15	157.5	19.4	 16
144	 15	467.5	30.9	 16
145	 15	344.8	35.8	 16
146	 15	183.0	24.0	 16
147	 15	100.0	14.3	 16
148	 15	412.8	53.8	 16
149	 15	147.5	19.2	 16
150	 15	229.0	29.4	 16
151	 15	308.8	21.8	 16
152	 15	166.0	25.1	 16
153	 15	144.5	18.8	 16
154	 15	172.5	29.6	 16
155	 15	90.0	12.0	 16
156	 15	134.3	22.1	 16
157	 15	166.3	19.5	 16
158	 15	170.8	22.2	 16
159	 15	213.0	30.6	 16
160	 15	329.3	35.6	 16
161	 15	711.3	84.6	 16
162	 15	115.5	18.5	 16
163	 15	152.0	17.4	 16
164	 15	86.0	14.4	 16
165	 15	101.8	14.1	 16
166	 15	125.3	21.6	 16
167	 15	139.5	24.1	 16
168	 15	151.3	28.1	 16
169	 15	147.5	27.7	 16
170	 15	114.5	13.6	 16
171	 15	113.5	18.3	 16
172	 15	169.0	24.2	 16
173	 15	127.8	14.2	 16
174	 15	92.3	13.2	 16
175	 15	116.5	21.9	 16
176	 15	139.3	15.7	 16
177	 15	169.8	21.7	 16
178	 15	419.3	31.4	 16
179	 15	151.5	25.5	 16
180	 15	135.8	21.5	 16
181	 15	104.5	14.0	 16
182	 15	339.8	38.8	 16
183	 15	131.3	10.8	 16
184	 15	147.8	15.0	 16
185	 15	133.5	20.8	 16
186	 15	125.0	19.8	 16
187	 15	103.3	16.5	 16
188	 15	337.8	48.7	 16
189	 15	307.5	32.0	 16
190	 15	279.5	42.5	 16
191	 15	97.0	14.3	 16
192	 15	115.5	19.8	 16
193	 15	149.3	30.3	 16
194	 15	174.3	23.2	 16
195	 15	149.8	21.2	 16
196	 15	118.3	16.5	 16
197	 15	185.3	29.3	 16
198	 15	104.5	14.6	 16
199	 15	90.3	17.9	 16
200	 15	87.5	12.1	 16
201	 15	236.3	41.1	 16
202	 15	173.8	21.0	 16
203	 15	161.3	23.0	 16
204	 15	147.5	18.5	 16
205	 15	152.3	15.0	 16
206	 15	266.3	28.9	 16
207	 15	113.3	13.5	 16
208	 15	174.8	24.8	 16
209	 15	161.3	16.5	 16
210	 15	114.3	17.2	 16
211	 15	111.3	14.6	 16
212	 15	111.0	14.2	 16
213	 15	112.0	13.4	 16
214	 15	139.3	18.7	 16
215	 15	122.8	33.1	 16
216	 15	1404.5	235.6	 16
217	 15	148.5	15.5	 16
218	 15	1121.5	223.5	 16
219	 15	247.8	47.8	 16
220	 15	127.5	19.0	 16
221	 15	179.3	21.7	 16
222	 15	114.3	20.9	 16
223	 15	136.3	13.0	 16
224	 15	118.8	21.8	 16
225	 15	100.5	9.4	 16
226	 15	153.0	33.3	 16
227	 15	93.3	26.4	 16
228	 15	108.5	16.2	 16
229	 15	444.3	49.9	 16
230	 15	127.0	20.7	 16
231	 15	106.3	17.0	 16
232	 15	155.3	23.1	 16
233	 15	91.3	13.4	 16
234	 15	155.3	22.2	 16
235	 15	447.0	50.0	 16
236	 15	747.0	79.5	 16
237	 15	323.5	39.4	 16
238	 15	391.3	37.3	 16
239	 15	165.5	20.8	 16
240	 15	157.3	19.5	 16
241	 15	207.3	35.8	 16
242	 15	454.3	67.1	 16
243	 15	103.3	14.3	 16
244	 15	113.3	18.0	 16
245	 15	121.3	20.8	 16
246	 15	161.3	34.3	 16
247	 15	126.8	22.9	 16
248	 15	193.0	43.9	 16
249	 15	549.3	93.5	 16
250	 15	82.5	10.4	 16
251	 15	101.8	13.6	 16
252	 15	218.8	32.8	 16
253	 15	156.0	20.6	 16
254	 15	708.0	59.3	 16
255	 15	172.0	13.6	 16
256	 15	191.5	24.3	 16
257	 15	291.5	30.2	 16
258	 15	95.3	17.9	 16
259	 15	80.8	15.4	 16
260	 15	131.3	21.5	 16
261	 15	154.3	16.3	 16
262	 15	194.5	30.8	 16
263	 15	161.3	27.2	 16
264	 15	188.0	32.4	 16
265	 15	112.0	19.5	 16
266	 15	96.3	14.9	 16
267	 15	139.0	17.8	 16
268	 15	148.5	28.5	 16
269	 15	155.8	21.4	 16
270	 15	99.3	20.7	 16
271	 15	114.8	18.2	 16
272	 15	162.5	33.4	 16
273	 15	105.0	19.0	 16
274	 15	241.8	30.9	 16
275	 15	240.0	27.1	 20
276	 15	191.3	18.3	 16
277	 15	99.5	17.5	 16
278	 15	73.3	10.2	 16
279	 15	212.3	20.5	 16
280	 15	388.8	41.7	 16
281	 15	130.0	16.9	 16
282	 15	172.3	27.4	 16
283	 15	98.0	15.0	 16
284	 15	91.3	15.6	 16
285	 15	160.3	15.1	 16
286	 15	139.8	19.1	 16
287	 15	228.5	29.5	 16
288	 15	811.0	137.5	 16
289	 15	148.5	22.6	 16
290	 15	156.3	18.4	 16
291	 15	99.8	20.0	 16
292	 15	717.0	142.3	 16
293	 15	349.3	52.9	 16
294	 15	158.5	18.6	 16
295	 15	122.3	12.1	 16
296	 15	199.5	34.6	 16
297	 15	607.0	51.0	 16
298	 15	193.5	18.0	 16
299	 15	148.3	18.2	 16
300	 15	90.0	13.4	 16
301	 15	111.8	13.5	 16
302	 15	97.5	20.7	 16
303	 15	87.8	18.7	 16
304	 15	349.5	49.8	 16
305	 15	88.3	13.2	 16
306	 15	162.0	25.4	 16
307	 15	131.3	20.6	 16
308	 15	199.3	26.4	 16
309	 15	147.5	19.3	 16
310	 15	356.5	35.6	 16
311	 15	277.0	35.1	 16
312	 15	148.0	18.2	 16
313	 15	80.8	12.2	 16
314	 15	128.5	18.3	 16
315	 15	169.5	30.5	 16
316	 15	572.0	73.3	 16
317	 15	244.8	34.1	 16
318	 15	145.0	18.3	 16
319	 15	217.3	27.2	 16
320	 15	146.3	20.2	 16
321	 15	181.0	37.1	 16
322	 15	257.0	27.7	 16
323	 15	131.3	24.5	 16
324	 15	549.0	38.1	 16
325	 15	111.0	14.8	 16
326	 15	114.3	16.6	 16
327	 15	133.0	20.6	 16
328	 15	97.5	17.8	 16
329	 15	89.3	16.1	 16
330	 15	626.3	77.3	 16
331	 15	213.0	32.1	 16
332	 15	288.5	21.9	 16
333	 15	267.0	28.1	 16
334	 15	97.5	13.7	 16
335	 15	74.8	13.0	 16
336	 15	100.0	13.7	 16
337	 15	361.3	33.7	 16
338	 15	270.3	17.3	 16
339	 15	235.0	19.3	 16
340	 15	181.0	23.8	 16
341	 15	110.0	11.2	 16
342	 15	101.8	17.6	 16
343	 15	108.3	18.3	 16
344	 15	145.5	15.1	 16
345	 15	124.5	20.7	 16
346	 15	137.3	25.9	 16
347	 15	81.5	15.1	 16
348	 15	210.0	27.8	 16
349	 15	100.0	10.8	 16
350	 15	166.3	21.2	 16
351	 15	142.0	19.0	 16
352	 15	100.0	12.5	 16
353	 15	137.3	19.3	 16
354	 15	80.8	9.1	 16
355	 15	189.0	33.2	 16
356	 15	519.8	59.5	 16
357	 15	238.0	24.9	 16
358	 15	236.5	22.3	 16
359	 15	292.3	44.1	 16
360	 15	80.8	15.9	 16
361	 15	126.3	21.3	 16
362	 15	170.0	19.5	 16
363	 15	88.0	17.9	 16
364	 15	126.0	12.4	 16
365	 15	91.0	19.7	 16
366	 15	141.8	25.9	 16
367	 15	210.0	38.1	 16
368	 15	88.3	9.3	 16
369	 15	86.3	15.5	 16
370	 15	76.0	12.2	 16
371	 15	85.5	9.8	 16
372	 15	126.5	14.8	 16
373	 15	316.3	34.7	 16
374	 15	96.5	13.2	 16
375	 15	234.3	25.6	 16
376	 15	214.8	21.9	 16
377	 15	133.3	14.7	 16
378	 15	115.3	13.6	 16
379	 15	204.0	25.8	 16
380	 15	90.8	14.6	 16
381	 15	85.3	15.9	 16
382	 15	78.3	15.6	 16
383	 15	138.8	23.9	 16
384	 15	98.3	10.6	 16
385	 15	364.5	59.0	 16
386	 15	148.0	17.0	 16
387	 15	369.0	73.9	 16
388	 15	456.3	54.5	 16
389	 15	225.5	32.4	 16
390	 15	93.3	13.6	 16
391	 15	109.3	14.7	 16
392	 15	120.0	16.9	 16
393	 15	413.3	50.5	 16
394	 15	289.0	39.0	 16
395	 15	135.3	14.7	 16
396	 15	92.3	13.5	 16
397	 15	115.3	16.2	 16
398	 15	90.0	17.4	 16
399	 15	98.3	18.1	 16
400	 15	195.5	31.7	 16
401	 15	123.0	17.4	 16
402	 15	139.0	23.4	 16
403	 15	122.3	16.9	 16
404	 15	1188.5	241.1	 16
405	 15	286.3	33.5	 16
406	 15	137.0	21.5	 16
407	 15	605.8	125.7	 16
408	 15	209.8	35.3	 16
409	 15	96.3	12.9	 16
410	 15	153.8	32.2	 16
411	 15	163.5	34.6	 16
412	 15	92.3	13.1	 16
413	 15	300.8	81.2	 16
414	 15	118.8	24.1	 16
415	 15	198.3	30.8	 16
416	 15	153.5	27.6	 16
417	 15	305.3	46.3	 20
418	 15	159.0	27.1	 16
419	 15	152.0	24.1	 16
420	 15	103.8	14.0	 16
421	 15	86.5	14.2	 16
422	 15	74.5	8.9	 16
423	 15	166.8	18.5	 16
424	 15	151.5	16.9	 16
425	 15	90.3	17.2	 16
426	 15	91.8	16.6	 16
427	 15	189.5	27.7	 16
428	 15	78.5	12.3	 16
429	 15	99.5	18.9	 16
430	 15	92.5	16.0	 16
431	 15	6245.0	1077.4	 16
432	 15	122.3	18.7	 16
433	 15	119.0	12.8	 16
434	 15	371.3	36.6	 16
435	 15	221.5	24.6	 16
436	 15	118.8	17.0	 16
437	 15	270.3	29.1	 16
438	 15	211.5	24.6	 16
439	 15	150.5	16.9	 16
440	 15	6533.0	505.4	 16
441	 15	262.0	25.3	 16
442	 15	86.3	12.2	 16
443	 15	186.3	23.4	 16
444	 15	263.5	24.9	 16
445	 15	292.0	38.2	 16
446	 15	237.0	24.8	 16
447	 15	243.8	23.2	 16
448	 15	251.5	32.8	 16
449	 15	235.5	23.0	 16
450	 15	251.8	32.5	 16
451	 15	889.0	130.0	 16
452	 15	107.0	15.7	 16
453	 15	197.8	33.1	 16
454	 15	328.3	46.0	 16
455	 15	104.0	10.2	 16
456	 15	69.5	11.4	 16
457	 15	122.0	21.0	 16
458	 15	285.3	44.8	 16
459	 15	109.8	18.0	 16
460	 15	130.3	22.3	 16
461	 15	118.5	13.9	 16
462	 15	114.0	15.6	 16
463	 15	96.3	12.6	 16
464	 15	105.5	14.5	 16
465	 15	96.3	18.1	 16
466	 15	101.0	16.3	 16
467	 15	166.3	24.8	 16
468	 15	170.5	19.6	 16
469	 15	280.5	31.2	 16
470	 15	85.3	15.0	 16
471	 15	252.8	28.4	 16
472	 15	99.5	21.4	 16
473	 15	122.0	15.3	 16
474	 15	184.5	22.7	 16
475	 15	156.0	20.3	 16
476	 15	81.5	13.6	 16
477	 15	238.3	29.3	 16
478	 15	552.3	72.1	 16
479	 15	158.5	19.5	 16
480	 15	109.0	12.3	 16
481	 15	261.0	45.1	 16
482	 15	107.3	18.7	 16
483	 15	79.8	13.4	 16
484	 15	79.0	11.2	 16
485	 15	86.3	13.4	 16
486	 15	148.0	22.3	 16
487	 15	100.3	16.1	 16
488	 15	110.8	13.2	 16
489	 15	104.0	20.8	 16
490	 15	113.5	21.5	 16
491	 15	86.5	15.4	 16
492	 15	281.5	44.6	 16
493	 15	115.8	13.6	 16
494	 15	82.3	17.6	 16
495	 15	86.8	14.2	 16
496	 15	334.3	66.1	 16
497	 15	75.5	10.5	 16
498	 15	73.5	12.2	 16
499	 15	81.0	12.9	 16
500	 15	77.5	10.6	 16
501	 15	90.3	11.7	 16
502	 15	90.8	11.6	 16
503	 15	324.5	51.1	 16
504	 15	126.5	20.2	 16
505	 15	241.8	36.5	 16
506	 15	97.3	15.0	 16
507	 15	504.3	81.4	 16
508	 15	166.8	20.2	 16
509	 15	96.8	14.7	 16
510	 15	106.5	17.2	 16
511	 15	127.5	19.6	 16
512	 15	119.3	16.4	 16
513	 15	124.8	20.6	 16
514	 15	103.8	18.5	 16
515	 15	107.3	17.3	 16
516	 15	140.0	22.9	 16
517	 15	164.3	36.0	 16
518	 15	107.3	23.4	 16
519	 15	95.3	15.7	 16
520	 15	87.3	11.9	 16
521	 15	95.0	17.9	 16
522	 15	108.0	13.7	 16
523	 15	289.5	42.3	 16
524	 15	85.3	12.2	 16
525	 15	300.3	42.6	 16
526	 15	150.0	20.2	 16
527	 15	112.8	18.3	 16
528	 15	141.3	30.1	 16
529	 15	114.8	21.4	 16
530	 15	138.0	23.4	 16
531	 15	213.3	39.6	 16
532	 15	69.3	10.4	 16
533	 15	75.0	19.4	 16
534	 15	84.3	12.5	 16
535	 15	345.0	58.0	 16
536	 15	142.8	24.8	 16
537	 15	297.8	31.6	 16
538	 15	349.0	32.4	 16
539	 15	148.3	20.0	 16
540	 15	815.0	135.6	 16
541	 15	92.5	16.2	 16
542	 15	121.5	28.2	 16
543	 15	110.5	24.7	 16
544	 15	401.0	73.8	 16
545	 15	197.3	36.7	 16
546	 15	81.0	11.3	 16
547	 15	253.0	44.6	 16
548	 15	148.3	23.3	 16
549	 15	61.3	14.1	 16
550	 15	83.3	17.4	 16
551	 15	82.3	15.0	 16
552	 15	131.0	28.7	 16
553	 15	291.8	68.7	 16
554	 15	126.3	31.1	 16
555	 15	100.8	18.9	 16
556	 15	742.5	206.3	 16
557	 15	435.8	57.5	 16
558	 15	165.5	47.9	 16
559	 15	150.5	26.5	 16
560	 15	82.5	12.1	 20
561	 15	242.0	35.4	 16
562	 15	139.8	25.0	 16
563	 15	154.5	18.6	 16
564	 15	108.8	15.2	 16
565	 15	141.3	24.3	 16
566	 15	301.3	41.6	 16
567	 15	204.0	30.3	 16
568	 15	177.5	20.1	 16
569	 15	192.5	18.4	 16
570	 15	282.3	31.5	 16
571	 15	133.3	15.5	 16
572	 15	124.0	19.1	 16
573	 15	562.5	82.1	 16
574	 15	93.5	17.2	 16
575	 15	85.3	8.6	 16
576	 15	162.3	28.6	 16
577	 15	329.3	33.2	 16
578	 15	121.5	42.3	 16
579	 15	127.5	15.9	 16
580	 15	360.3	51.9	 16
581	 15	153.5	23.8	 16
582	 15	117.0	11.3	 16
583	 15	117.5	18.0	 16
584	 15	137.3	24.1	 16
585	 15	160.3	18.2	 16
586	 15	625.3	55.0	 16
587	 15	153.8	22.4	 16
588	 15	130.0	18.9	 16
589	 15	82.3	14.7	 16
590	 15	76.5	12.0	 16
591	 15	116.5	19.6	 16
592	 15	237.5	31.0	 16
593	 15	231.3	29.3	 16
594	 15	107.3	19.8	 16
595	 15	166.3	22.5	 16
596	 15	141.0	22.4	 16
597	 15	171.8	26.3	 16
598	 15	160.0	25.4	 16
599	 15	181.0	21.8	 16
600	 15	420.3	67.3	 16
601	 15	244.5	29.3	 16
602	 15	297.8	39.5	 16
603	 15	67.0	13.1	 16
604	 15	128.0	18.0	 16
605	 15	230.3	22.6	 16
606	 15	117.8	18.2	 16
607	 15	432.5	58.0	 16
608	 15	299.8	38.8	 16
609	 15	105.5	14.0	 16
610	 15	83.0	13.4	 16
611	 15	95.8	17.3	 16
612	 15	107.3	16.9	 16
613	 15	234.5	26.8	 16
614	 15	204.8	26.4	 16
615	 15	116.0	15.2	 16
616	 15	158.5	24.3	 16
617	 15	276.5	34.7	 16
618	 15	134.3	69.5	 16
619	 15	261.8	57.1	 16
620	 15	252.8	28.6	 16
621	 15	158.5	22.1	 16
622	 15	1182.0	127.1	 16
623	 15	507.0	84.5	 16
624	 15	106.5	20.1	 16
625	 15	240.5	36.5	 16
626	 15	96.0	11.6	 16
627	 15	140.3	26.2	 16
628	 15	182.0	25.4	 16
629	 15	176.5	18.8	 16
630	 15	265.3	35.0	 16
631	 15	118.8	14.3	 16
632	 15	203.8	23.6	 16
633	 15	341.8	35.4	 16
634	 15	309.5	31.7	 16
635	 15	361.0	39.0	 16
636	 15	241.3	28.0	 16
637	 15	155.0	15.9	 16
638	 15	270.0	35.2	 16
639	 15	133.5	20.7	 16
640	 15	136.8	13.2	 16
641	 15	180.5	24.2	 16
642	 15	117.8	22.1	 16
643	 15	281.0	42.9	 16
644	 15	137.0	23.3	 16
645	 15	166.0	25.7	 16
646	 15	159.8	25.1	 16
647	 15	111.0	15.9	 16
648	 15	167.3	26.7	 16
649	 15	109.8	14.2	 16
650	 15	78.5	13.3	 16
651	 15	69.3	14.4	 16
652	 15	140.8	19.8	 16
653	 15	187.3	26.5	 16
654	 15	106.3	14.7	 16
655	 15	73.8	12.7	 16
656	 15	1849.3	250.2	 16
657	 15	119.3	18.4	 16
658	 15	118.5	19.6	 16
659	 15	105.3	15.4	 16
660	 15	333.3	42.3	 16
661	 15	127.0	22.5	 16
662	 15	2194.0	533.3	 16
663	 15	115.0	9.0	 16
664	 15	136.0	18.0	 16
665	 15	186.3	26.6	 16
666	 15	75.3	10.0	 16
667	 15	74.0	12.7	 16
668	 15	115.5	18.9	 16
669	 15	88.3	15.1	 16
670	 15	101.3	18.5	 16
671	 15	267.0	46.5	 16
672	 15	109.3	18.3	 16
673	 15	211.0	45.1	 16
674	 15	108.8	20.2	 16
675	 15	2092.8	505.8	 16
676	 15	137.8	23.6	 16
677	 15	127.0	20.8	 16
678	 15	168.5	33.3	 16
679	 15	140.5	18.6	 16
680	 15	96.8	16.1	 16
681	 15	80.3	14.8	 16
682	 15	94.5	15.2	 16
683	 15	154.5	21.0	 16
684	 15	166.3	29.5	 16
685	 15	159.3	26.7	 16
686	 15	656.3	126.4	 16
687	 15	120.5	21.9	 16
688	 15	157.5	28.9	 16
689	 15	62.8	11.8	 16
690	 15	280.3	55.6	 16
691	 15	129.3	22.4	 16
692	 15	3190.3	798.4	 16
693	 15	96.5	20.4	 16
694	 15	164.3	29.8	 16
695	 15	77.0	13.1	 16
696	 15	79.3	11.0	 16
697	 15	113.3	26.2	 16
698	 15	102.8	15.5	 16
699	 15	91.3	13.7	 16
700	 15	87.0	12.4	 16
701	 15	162.5	32.7	 16
702	 15	202.0	27.6	 20
703	 15	85.0	11.8	 16
704	 15	280.3	29.3	 16
705	 15	306.5	34.8	 16
706	 15	135.8	16.2	 16
707	 15	151.8	17.8	 16
708	 15	251.3	22.9	 16
709	 15	94.5	15.1	 16
710	 15	2390.0	285.9	 16
711	 15	143.5	16.3	 16
  0	 16	5326.3	527.1	 16
  1	 16	152.0	24.7	 16
  2	 16	104.3	11.0	 16
  3	 16	116.3	15.8	 16
  4	 16	116.3	15.8	 16
  5	 16	112.8	19.2	 16
  6	 16	143.5	13.7	 16
  7	 16	117.3	17.1	 16
  8	 16	115.3	20.9	 16
  9	 16	122.0	15.7	 16
 10	 16	121.0	12.3	 16
 11	 16	134.3	27.3	 16
 12	 16	152.3	20.8	 16
 13	 16	96.5	14.4	 16
 14	 16	131.3	16.3	 16
 15	 16	124.5	21.2	 16
 16	 16	300.3	28.6	 16
 17	 16	245.3	37.6	 16
 18	 16	125.5	21.2	 16
 19	 16	195.8	23.2	 16
 20	 16	165.5	21.9	 16
 21	 16	110.3	20.1	 16
 22	 16	109.3	11.7	 16
 23	 16	112.0	19.2	 16
 24	 16	203.0	29.2	 16
 25	 16	131.8	21.0	 16
 26	 16	118.8	18.7	 16
 27	 16	94.0	13.9	 16
 28	 16	134.0	17.9	 16
 29	 16	190.0	20.5	 16
 30	 16	151.8	48.5	 16
 31	 16	199.8	22.5	 16
 32	 16	112.3	17.7	 16
 33	 16	135.5	25.4	 16
 34	 16	113.0	13.6	 16
 35	 16	180.0	24.2	 16
 36	 16	110.0	14.8	 16
 37	 16	95.8	9.9	 16
 38	 16	85.3	10.4	 16
 39	 16	126.8	25.5	 16
 40	 16	121.0	19.3	 16
 41	 16	120.5	22.7	 16
 42	 16	123.3	18.4	 16
 43	 16	165.3	17.3	 16
 44	 16	204.0	18.1	 16
 45	 16	218.5	29.8	 16
 46	 16	124.3	19.1	 16
 47	 16	142.8	14.7	 16
 48	 16	590.3	58.6	 16
 49	 16	177.3	20.0	 16
 50	 16	155.0	20.7	 16
 51	 16	202.5	19.3	 16
 52	 16	190.3	25.2	 16
 53	 16	108.3	15.9	 16
 54	 16	97.8	20.6	 16
 55	 16	118.5	15.2	 16
 56	 16	170.0	30.0	 16
 57	 16	150.5	19.8	 16
 58	 16	399.0	38.4	 16
 59	 16	135.5	17.9	 16
 60	 16	117.8	14.6	 16
 61	 16	117.8	18.2	 16
 62	 16	155.0	14.1	 16
 63	 16	82.3	17.0	 16
 64	 16	232.5	30.1	 16
 65	 16	113.3	26.2	 16
 66	 16	97.3	12.3	 16
 67	 16	187.0	24.7	 16
 68	 16	200.5	29.0	 16
 69	 16	210.5	28.4	 16
 70	 16	192.0	24.9	 16
 71	 16	146.0	17.9	 16
 72	 16	391.3	40.9	 16
 73	 16	334.8	43.6	 16
 74	 16	1224.5	103.6	 16
 75	 16	104.8	13.3	 16
 76	 16	261.5	29.9	 16
 77	 16	148.5	20.1	 16
 78	 16	93.0	11.7	 16
 79	 16	107.3	11.2	 16
 80	 16	92.5	12.0	 16
 81	 16	172.8	20.7	 16
 82	 16	84.5	10.0	 16
 83	 16	111.8	13.4	 16
 84	 16	101.3	14.0	 16
 85	 16	119.3	17.9	 16
 86	 16	101.3	17.1	 16
 87	 16	89.0	16.2	 16
 88	 16	119.3	15.3	 16
 89	 16	141.3	14.5	 16
 90	 16	135.0	19.4	 16
 91	 16	156.0	20.8	 16
 92	 16	122.5	14.1	 16
 93	 16	103.3	16.6	 16
 94	 16	114.3	23.8	 16
 95	 16	171.5	22.8	 16
 96	 16	202.8	32.8	 16
 97	 16	90.3	14.4	 16
 98	 16	135.8	16.9	 16
 99	 16	101.3	15.9	 16
100	 16	105.3	16.6	 16
101	 16	494.0	73.7	 16
102	 16	121.3	17.3	 16
103	 16	115.5	16.4	 16
104	 16	254.8	43.1	 16
105	 16	227.5	22.9	 16
106	 16	119.0	22.4	 16
107	 16	102.8	15.7	 16
108	 16	190.5	24.3	 16
109	 16	99.5	10.3	 16
110	 16	112.0	15.5	 16
111	 16	161.5	18.2	 16
112	 16	204.8	27.9	 16
113	 16	139.5	26.2	 16
114	 16	170.5	26.3	 16
115	 16	229.5	32.1	 16
116	 16	132.3	20.4	 16
117	 16	192.0	20.5	 16
118	 16	284.3	35.0	 16
119	 16	101.8	15.3	 16
120	 16	105.3	16.5	 16
121	 16	163.5	21.2	 16
122	 16	111.3	17.9	 16
123	 16	101.8	15.4	 16
124	 16	123.3	18.8	 16
125	 16	102.0	51.0	 16
126	 16	124.8	16.5	 16
127	 16	89.0	10.1	 16
128	 16	103.0	12.2	 16
129	 16	96.8	12.8	 16
130	 16	104.8	13.2	 16
131	 16	138.5	16.8	 16
132	 16	113.8	14.9	 16
133	 16	96.0	15.3	 16
134	 16	94.5	15.5	 16
135	 16	102.5	14.0	 16
136	 16	96.5	14.0	 16
137	 16	340.5	72.2	 20
138	 16	202.8	22.2	 16
139	 16	115.3	14.3	 16
140	 16	102.0	16.4	 16
141	 16	118.0	14.8	 16
142	 16	95.8	16.8	 16
143	 16	184.8	24.7	 16
144	 16	490.0	44.9	 16
145	 16	246.3	26.2	 16
146	 16	126.3	17.1	 16
147	 16	105.5	13.0	 16
148	 16	904.0	67.1	 16
149	 16	187.3	25.6	 16
150	 16	187.0	22.0	 16
151	 16	203.3	15.7	 16
152	 16	95.0	19.0	 16
153	 16	103.3	17.8	 16
154	 16	130.5	19.8	 16
155	 16	94.5	16.2	 16
156	 16	119.3	16.3	 16
157	 16	188.5	26.7	 16
158	 16	184.3	16.5	 16
159	 16	242.0	30.1	 16
160	 16	421.0	51.8	 16
161	 16	281.0	45.6	 16
162	 16	132.5	21.6	 16
163	 16	135.5	19.1	 16
164	 16	94.8	16.9	 16
165	 16	109.0	16.7	 16
166	 16	113.8	24.6	 16
167	 16	105.5	16.6	 16
168	 16	91.8	12.5	 16
169	 16	120.5	16.3	 16
170	 16	111.0	37.0	 16
171	 16	87.0	9.4	 16
172	 16	181.3	23.9	 16
173	 16	119.5	21.4	 16
174	 16	82.8	10.7	 16
175	 16	109.0	13.2	 16
176	 16	128.3	20.5	 16
177	 16	245.3	37.4	 16
178	 16	1157.0	86.8	 16
179	 16	147.0	17.3	 16
180	 16	121.3	18.6	 16
181	 16	222.8	33.9	 16
182	 16	223.8	29.9	 16
183	 16	206.0	18.4	 16
184	 16	199.8	25.2	 16
185	 16	117.3	17.8	 16
186	 16	110.8	17.8	 16
187	 16	107.0	17.8	 16
188	 16	191.5	24.8	 16
189	 16	209.8	28.5	 16
190	 16	208.3	22.0	 16
191	 16	110.0	67.8	 16
192	 16	116.5	15.3	 16
193	 16	103.8	14.5	 16
194	 16	174.0	16.8	 16
195	 16	139.8	15.5	 16
196	 16	116.0	17.9	 16
197	 16	106.5	16.8	 16
198	 16	109.3	17.4	 16
199	 16	90.3	16.3	 16
200	 16	81.3	8.0	 16
201	 16	119.8	14.4	 16
202	 16	210.8	17.4	 16
203	 16	137.3	18.7	 16
204	 16	130.5	23.2	 16
205	 16	167.3	18.1	 16
206	 16	154.3	19.5	 16
207	 16	106.5	17.7	 16
208	 16	136.8	23.5	 16
209	 16	158.8	21.8	 16
210	 16	90.3	12.6	 16
211	 16	78.3	10.5	 16
212	 16	80.5	9.7	 16
213	 16	96.8	14.9	 16
214	 16	94.5	11.0	 16
215	 16	92.5	15.7	 16
216	 16	316.8	46.4	 16
217	 16	141.0	17.5	 16
218	 16	209.3	22.0	 16
219	 16	136.3	16.0	 16
220	 16	121.3	25.7	 16
221	 16	115.0	16.7	 16
222	 16	133.8	18.4	 16
223	 16	119.8	20.2	 16
224	 16	130.3	23.0	 16
225	 16	91.0	15.6	 16
226	 16	94.0	16.7	 16
227	 16	88.3	15.1	 16
228	 16	106.8	19.4	 16
229	 16	496.8	48.0	 16
230	 16	96.8	9.0	 16
231	 16	82.3	17.0	 16
232	 16	99.5	17.0	 16
233	 16	79.5	13.2	 16
234	 16	178.5	21.6	 16
235	 16	461.8	34.9	 16
236	 16	638.0	56.7	 16
237	 16	211.8	25.9	 16
238	 16	122.5	20.5	 16
239	 16	183.5	16.9	 16
240	 16	131.5	17.8	 16
241	 16	101.0	12.1	 16
242	 16	133.5	20.9	 16
243	 16	97.3	12.5	 16
244	 16	108.5	10.8	 16
245	 16	131.5	15.5	 16
246	 16	114.0	15.1	 16
247	 16	123.3	13.1	 16
248	 16	92.8	17.9	 16
249	 16	246.8	47.7	 16
250	 16	83.3	19.6	 16
251	 16	116.8	22.8	 16
252	 16	92.0	17.3	 16
253	 16	130.0	15.0	 16
254	 16	937.5	68.3	 16
255	 16	250.3	36.7	 16
256	 16	147.3	22.0	 16
257	 16	199.0	28.3	 16
258	 16	83.8	14.2	 16
259	 16	88.5	14.4	 16
260	 16	84.3	10.2	 16
261	 16	150.3	23.8	 16
262	 16	160.5	23.6	 16
263	 16	106.0	17.2	 16
264	 16	138.8	23.5	 16
265	 16	104.8	9.3	 16
266	 16	102.3	16.6	 16
267	 16	137.5	21.3	 16
268	 16	164.8	23.3	 16
269	 16	97.0	14.1	 16
270	 16	98.8	12.9	 16
271	 16	94.0	10.5	 16
272	 16	113.3	13.3	 16
273	 16	113.0	16.5	 16
274	 16	215.5	32.0	 16
275	 16	227.5	22.4	 16
276	 16	166.8	28.0	 16
277	 16	96.3	14.3	 16
278	 16	76.3	12.0	 16
279	 16	117.0	14.8	 20
280	 16	280.5	29.3	 16
281	 16	117.0	11.4	 16
282	 16	106.0	14.2	 16
283	 16	88.5	17.8	 16
284	 16	106.0	19.3	 16
285	 16	134.0	17.9	 16
286	 16	143.3	14.3	 16
287	 16	164.3	21.4	 16
288	 16	370.0	41.7	 16
289	 16	126.3	17.0	 16
290	 16	116.8	17.0	 16
291	 16	108.0	13.7	 16
292	 16	414.3	44.0	 16
293	 16	153.5	24.0	 16
294	 16	128.5	17.7	 16
295	 16	123.0	14.1	 16
296	 16	99.8	12.3	 16
297	 16	267.0	34.6	 16
298	 16	164.3	25.0	 16
299	 16	126.0	20.3	 16
300	 16	87.3	20.3	 16
301	 16	95.3	16.4	 16
302	 16	93.3	15.9	 16
303	 16	78.3	12.1	 16
304	 16	109.3	18.8	 16
305	 16	82.8	15.6	 16
306	 16	112.0	14.2	 16
307	 16	111.5	16.3	 16
308	 16	123.0	18.7	 16
309	 16	136.0	25.0	 16
310	 16	658.3	58.2	 16
311	 16	266.8	30.0	 16
312	 16	160.5	20.7	 16
313	 16	92.0	17.9	 16
314	 16	89.3	14.1	 16
315	 16	118.0	16.5	 16
316	 16	526.8	45.5	 16
317	 16	257.0	27.7	 16
318	 16	154.5	23.1	 16
319	 16	237.0	28.1	 16
320	 16	157.0	20.7	 16
321	 16	163.5	18.4	 16
322	 16	200.0	26.4	 16
323	 16	105.5	15.8	 16
324	 16	129.5	15.2	 16
325	 16	195.0	23.2	 16
326	 16	117.0	16.3	 16
327	 16	107.8	13.3	 16
328	 16	95.0	14.3	 16
329	 16	87.8	20.2	 16
330	 16	195.3	31.5	 16
331	 16	77.0	10.9	 16
332	 16	125.3	18.2	 16
333	 16	225.3	18.9	 16
334	 16	99.0	43.9	 16
335	 16	76.0	14.2	 16
336	 16	92.8	17.9	 16
337	 16	269.3	26.5	 16
338	 16	117.3	15.9	 16
339	 16	112.3	16.2	 16
340	 16	100.8	17.6	 16
341	 16	71.8	9.4	 16
342	 16	108.8	18.4	 16
343	 16	87.3	12.0	 16
344	 16	82.5	15.8	 16
345	 16	78.8	12.7	 16
346	 16	130.3	20.1	 16
347	 16	90.5	16.1	 16
348	 16	92.5	16.0	 16
349	 16	100.3	12.9	 16
350	 16	124.0	23.9	 16
351	 16	147.3	25.2	 16
352	 16	85.3	13.1	 16
353	 16	99.3	14.3	 16
354	 16	93.5	16.8	 16
355	 16	104.5	16.7	 16
356	 16	340.3	36.1	 16
357	 16	150.3	18.6	 16
358	 16	148.0	30.8	 16
359	 16	171.3	31.6	 16
360	 16	82.8	14.9	 16
361	 16	106.3	14.6	 16
362	 16	108.3	17.6	 16
363	 16	91.8	15.0	 16
364	 16	93.5	13.2	 16
365	 16	68.3	10.1	 16
366	 16	158.5	26.2	 16
367	 16	196.0	25.0	 16
368	 16	70.8	13.6	 16
369	 16	77.3	14.3	 16
370	 16	71.3	14.5	 16
371	 16	88.3	14.9	 16
372	 16	142.3	23.8	 16
373	 16	146.8	19.9	 16
374	 16	80.0	15.4	 16
375	 16	256.3	33.2	 16
376	 16	135.0	20.3	 16
377	 16	112.3	11.5	 16
378	 16	110.3	26.9	 16
379	 16	170.0	30.9	 16
380	 16	99.0	12.7	 16
381	 16	88.3	14.1	 16
382	 16	68.0	13.4	 16
383	 16	80.8	10.1	 16
384	 16	101.0	16.2	 16
385	 16	148.5	18.1	 16
386	 16	155.8	19.3	 16
387	 16	277.5	34.3	 16
388	 16	486.5	42.3	 16
389	 16	182.3	23.4	 16
390	 16	104.0	18.8	 16
391	 16	88.0	13.1	 16
392	 16	106.3	11.4	 16
393	 16	139.5	18.7	 16
394	 16	159.8	11.5	 16
395	 16	101.3	16.0	 16
396	 16	75.0	13.0	 16
397	 16	86.8	17.9	 16
398	 16	82.3	13.8	 16
399	 16	81.0	10.7	 16
400	 16	184.5	36.8	 16
401	 16	86.0	12.6	 16
402	 16	134.3	21.4	 16
403	 16	115.0	21.7	 16
404	 16	264.8	35.7	 16
405	 16	402.0	23.7	 16
406	 16	136.0	22.9	 16
407	 16	127.3	16.2	 16
408	 16	167.8	28.2	 16
409	 16	92.0	12.1	 16
410	 16	107.0	15.7	 16
411	 16	76.3	9.9	 16
412	 16	92.8	12.2	 16
413	 16	100.5	19.5	 16
414	 16	93.3	10.5	 16
415	 16	99.5	20.4	 16
416	 16	154.8	33.8	 16
417	 16	111.3	20.0	 16
418	 16	131.8	22.8	 16
419	 16	126.5	19.4	 16
420	 16	100.8	14.5	 16
421	 16	81.8	17.3	 16
422	 16	72.8	10.8	 20
423	 16	120.0	10.3	 16
424	 16	102.0	8.8	 16
425	 16	86.3	12.2	 16
426	 16	103.5	14.8	 16
427	 16	199.3	25.3	 16
428	 16	78.5	15.0	 16
429	 16	84.5	8.9	 16
430	 16	79.8	16.3	 16
431	 16	2218.0	192.3	 16
432	 16	111.3	23.2	 16
433	 16	101.0	16.3	 16
434	 16	232.3	24.1	 16
435	 16	184.8	30.5	 16
436	 16	111.3	13.0	 16
437	 16	205.0	23.5	 16
438	 16	263.0	35.3	 16
439	 16	155.5	20.7	 16
440	 16	1448.0	255.4	 16
441	 16	303.5	26.6	 16
442	 16	85.8	13.9	 16
443	 16	85.5	12.8	 16
444	 16	138.5	15.6	 16
445	 16	322.0	38.3	 16
446	 16	162.5	16.7	 16
447	 16	146.5	19.1	 16
448	 16	164.3	19.4	 16
449	 16	143.3	18.6	 16
450	 16	120.3	19.2	 16
451	 16	299.8	25.0	 16
452	 16	130.3	16.3	 16
453	 16	172.3	20.5	 16
454	 16	186.0	18.8	 16
455	 16	80.3	16.3	 16
456	 16	59.0	9.4	 16
457	 16	89.3	9.6	 16
458	 16	180.5	18.8	 16
459	 16	91.5	16.5	 16
460	 16	132.3	16.4	 16
461	 16	133.3	23.2	 16
462	 16	113.3	18.7	 16
463	 16	92.5	19.2	 16
464	 16	84.0	13.0	 16
465	 16	105.5	14.5	 16
466	 16	94.0	9.6	 16
467	 16	86.3	10.6	 16
468	 16	117.3	13.3	 16
469	 16	159.8	17.5	 16
470	 16	160.0	19.3	 16
471	 16	123.3	19.8	 16
472	 16	103.8	22.2	 16
473	 16	91.5	17.0	 16
474	 16	146.8	22.4	 16
475	 16	161.3	26.4	 16
476	 16	77.5	12.9	 16
477	 16	148.5	18.0	 16
478	 16	226.0	28.0	 16
479	 16	180.0	26.3	 16
480	 16	85.3	17.3	 16
481	 16	119.5	17.5	 16
482	 16	105.5	16.1	 16
483	 16	76.3	11.8	 16
484	 16	108.3	20.6	 16
485	 16	82.0	14.8	 16
486	 16	121.0	15.8	 16
487	 16	104.0	15.5	 16
488	 16	95.5	13.5	 16
489	 16	100.8	14.7	 16
490	 16	98.0	14.5	 16
491	 16	74.3	16.1	 16
492	 16	128.5	19.5	 16
493	 16	163.0	15.1	 16
494	 16	75.3	8.7	 16
495	 16	93.5	16.9	 16
496	 16	75.8	12.9	 16
497	 16	70.8	12.8	 16
498	 16	80.0	15.4	 16
499	 16	73.8	14.3	 16
500	 16	76.8	12.7	 16
501	 16	190.8	28.2	 16
502	 16	96.3	13.6	 16
503	 16	134.5	20.5	 16
504	 16	89.5	11.9	 16
505	 16	134.0	24.0	 16
506	 16	85.5	13.1	 16
507	 16	113.8	22.1	 16
508	 16	134.5	17.3	 16
509	 16	109.5	14.6	 16
510	 16	115.8	20.9	 16
511	 16	97.5	16.0	 16
512	 16	123.5	21.8	 16
513	 16	104.0	15.3	 16
514	 16	105.3	12.2	 16
515	 16	88.5	12.4	 16
516	 16	112.3	16.9	 16
517	 16	86.0	14.5	 16
518	 16	93.3	14.7	 16
519	 16	76.0	12.1	 16
520	 16	78.3	14.9	 16
521	 16	89.0	16.0	 16
522	 16	85.0	16.5	 16
523	 16	114.0	17.7	 16
524	 16	81.0	14.6	 16
525	 16	116.5	16.7	 16
526	 16	97.8	14.3	 16
527	 16	158.5	30.3	 16
528	 16	96.3	11.4	 16
529	 16	71.8	11.5	 16
530	 16	168.0	23.1	 16
531	 16	341.5	42.8	 16
532	 16	61.0	9.6	 16
533	 16	66.0	11.9	 16
534	 16	81.0	11.9	 16
535	 16	177.8	19.7	 16
536	 16	94.5	16.1	 16
537	 16	186.0	21.6	 16
538	 16	422.8	37.2	 16
539	 16	166.5	18.0	 16
540	 16	244.8	26.5	 16
541	 16	88.5	15.1	 16
542	 16	103.5	20.2	 16
543	 16	88.8	15.9	 16
544	 16	177.8	30.2	 16
545	 16	119.5	17.2	 16
546	 16	82.5	11.5	 16
547	 16	158.0	26.9	 16
548	 16	130.5	19.4	 16
549	 16	71.3	10.4	 16
550	 16	76.3	8.2	 16
551	 16	85.5	12.9	 16
552	 16	79.3	14.1	 16
553	 16	95.8	15.5	 16
554	 16	441.0	90.3	 16
555	 16	152.0	26.3	 16
556	 16	414.0	67.7	 16
557	 16	263.3	41.1	 16
558	 16	121.8	27.4	 16
559	 16	90.0	13.0	 16
560	 16	76.3	13.0	 16
561	 16	80.0	14.2	 16
562	 16	130.0	20.0	 16
563	 16	108.8	18.8	 16
564	 16	104.8	13.0	 20
565	 16	116.8	14.4	 16
566	 16	89.5	15.0	 16
567	 16	221.0	31.2	 16
568	 16	181.3	18.3	 16
569	 16	195.3	34.1	 16
570	 16	190.3	35.9	 16
571	 16	99.3	12.7	 16
572	 16	109.0	16.5	 16
573	 16	95.0	18.0	 16
574	 16	68.5	9.4	 16
575	 16	83.3	15.7	 16
576	 16	112.5	20.6	 16
577	 16	242.5	34.4	 16
578	 16	88.3	11.3	 16
579	 16	106.5	17.3	 16
580	 16	279.3	21.6	 16
581	 16	175.3	28.1	 16
582	 16	103.8	17.8	 16
583	 16	104.0	15.7	 16
584	 16	134.0	19.9	 16
585	 16	150.5	24.8	 16
586	 16	177.5	14.3	 16
587	 16	139.3	19.8	 16
588	 16	124.3	11.7	 16
589	 16	82.0	13.8	 16
590	 16	73.0	10.6	 16
591	 16	96.5	11.8	 16
592	 16	104.3	13.2	 16
593	 16	231.0	25.3	 16
594	 16	116.3	12.4	 16
595	 16	205.3	27.9	 16
596	 16	129.0	18.0	 16
597	 16	132.3	21.4	 16
598	 16	104.3	14.3	 16
599	 16	124.5	21.7	 16
600	 16	163.5	22.2	 16
601	 16	222.5	20.0	 16
602	 16	170.0	18.8	 16
603	 16	65.3	10.2	 16
604	 16	94.3	17.6	 16
605	 16	151.0	21.3	 16
606	 16	86.5	12.7	 16
607	 16	100.8	17.4	 16
608	 16	111.3	20.6	 16
609	 16	113.5	19.4	 16
610	 16	92.8	15.7	 16
611	 16	94.0	16.0	 16
612	 16	75.0	12.5	 16
613	 16	139.3	29.6	 16
614	 16	102.8	13.6	 16
615	 16	99.3	11.6	 16
616	 16	123.3	19.6	 16
617	 16	225.0	31.4	 16
618	 16	121.5	19.9	 16
619	 16	177.3	11.7	 16
620	 16	159.0	32.9	 16
621	 16	75.3	11.0	 16
622	 16	376.0	53.9	 16
623	 16	476.5	32.6	 16
624	 16	99.5	16.1	 16
625	 16	282.0	27.3	 16
626	 16	113.8	19.8	 16
627	 16	141.8	16.1	 16
628	 16	197.8	23.0	 16
629	 16	176.5	24.9	 16
630	 16	222.3	15.1	 16
631	 16	171.0	31.3	 16
632	 16	140.8	17.0	 16
633	 16	236.0	25.3	 16
634	 16	252.3	34.5	 16
635	 16	451.5	50.7	 16
636	 16	155.3	17.2	 16
637	 16	122.0	20.0	 16
638	 16	231.3	20.9	 16
639	 16	119.8	15.9	 16
640	 16	123.0	13.3	 16
641	 16	304.5	18.9	 16
642	 16	164.0	40.7	 16
643	 16	109.0	19.8	 16
644	 16	160.0	18.1	 16
645	 16	124.5	18.0	 16
646	 16	118.0	17.6	 16
647	 16	124.8	23.5	 16
648	 16	117.8	19.6	 16
649	 16	77.3	9.7	 16
650	 16	74.5	8.8	 16
651	 16	70.5	13.2	 16
652	 16	124.0	17.4	 16
653	 16	192.8	24.1	 16
654	 16	129.3	22.9	 16
655	 16	77.3	15.3	 16
656	 16	348.5	68.6	 16
657	 16	139.5	13.0	 16
658	 16	118.3	16.2	 16
659	 16	101.0	19.1	 16
660	 16	196.3	28.8	 16
661	 16	137.3	20.7	 16
662	 16	497.3	105.8	 16
663	 16	115.5	15.9	 16
664	 16	143.3	18.7	 16
665	 16	202.0	26.6	 16
666	 16	86.5	25.7	 16
667	 16	59.5	16.2	 16
668	 16	80.3	14.9	 16
669	 16	79.3	9.9	 16
670	 16	95.0	15.7	 16
671	 16	172.0	21.4	 16
672	 16	96.8	15.0	 16
673	 16	107.8	17.6	 16
674	 16	153.0	20.4	 16
675	 16	405.3	78.5	 16
676	 16	117.8	13.1	 16
677	 16	114.0	14.6	 16
678	 16	112.5	16.1	 16
679	 16	139.0	19.3	 16
680	 16	114.3	18.3	 16
681	 16	90.3	27.8	 16
682	 16	96.0	24.1	 16
683	 16	129.5	18.1	 16
684	 16	98.5	15.2	 16
685	 16	100.8	16.2	 16
686	 16	149.0	13.6	 16
687	 16	137.8	20.0	 16
688	 16	81.5	13.7	 16
689	 16	69.3	13.1	 16
690	 16	98.0	15.9	 16
691	 16	117.5	16.4	 16
692	 16	543.8	97.6	 16
693	 16	95.0	16.7	 16
694	 16	129.8	23.1	 16
695	 16	79.8	12.7	 16
696	 16	98.8	14.4	 16
697	 16	99.3	19.0	 16
698	 16	94.0	13.2	 16
699	 16	85.0	14.4	 16
700	 16	118.3	22.0	 16
701	 16	119.5	19.1	 16
702	 16	457.0	39.6	 16
703	 16	105.0	17.5	 16
704	 16	417.0	53.5	 16
705	 16	376.0	25.0	 16
706	 16	207.5	41.2	 20
707	 16	137.8	16.1	 16
708	 16	174.0	21.6	 16
709	 16	87.0	14.5	 16
710	 16	390.8	56.9	 16
711	 16	7664.3	765.6	 16
  0	 17	164.8	19.3	 16
  1	 17	144.8	18.7	 16
  2	 17	106.5	14.3	 16
  3	 17	578.0	57.5	 16
  4	 17	165.0	23.5	 16
  5	 17	261.3	26.4	 16
  6	 17	167.0	22.2	 16
  7	 17	126.3	19.7	 16
  8	 17	238.5	25.9	 16
  9	 17	176.3	26.8	 16
 10	 17	108.3	13.0	 16
 11	 17	115.5	15.1	 16
 12	 17	134.3	16.2	 16
 13	 17	121.0	20.5	 16
 14	 17	112.8	10.4	 16
 15	 17	125.5	16.8	 16
 16	 17	206.8	32.7	 16
 17	 17	146.3	19.0	 16
 18	 17	776.8	68.7	 16
 19	 17	118.5	12.0	 16
 20	 17	220.8	33.0	 16
 21	 17	162.0	22.4	 16
 22	 17	151.8	21.4	 16
 23	 17	126.0	19.3	 16
 24	 17	262.3	23.2	 16
 25	 17	110.3	14.7	 16
 26	 17	113.8	16.9	 16
 27	 17	89.0	14.4	 16
 28	 17	265.8	48.4	 16
 29	 17	97.5	20.0	 16
 30	 17	98.8	13.4	 16
 31	 17	82.5	16.2	 16
 32	 17	116.0	19.5	 16
 33	 17	106.8	12.2	 16
 34	 17	169.8	22.1	 16
 35	 17	186.5	20.6	 16
 36	 17	116.3	16.8	 16
 37	 17	160.5	19.3	 16
 38	 17	110.3	15.8	 16
 39	 17	225.3	28.4	 16
 40	 17	105.8	13.9	 16
 41	 17	110.3	21.2	 16
 42	 17	92.3	16.8	 16
 43	 17	115.3	14.0	 16
 44	 17	329.8	31.4	 16
 45	 17	536.3	49.1	 16
 46	 17	226.0	21.7	 16
 47	 17	183.3	32.4	 16
 48	 17	129.5	15.1	 16
 49	 17	128.0	18.0	 16
 50	 17	168.0	20.0	 16
 51	 17	130.0	22.2	 16
 52	 17	157.3	34.6	 16
 53	 17	97.8	14.6	 16
 54	 17	103.5	10.5	 16
 55	 17	104.5	13.7	 16
 56	 17	1078.0	170.3	 16
 57	 17	148.3	21.8	 16
 58	 17	101.5	18.8	 16
 59	 17	131.3	45.4	 16
 60	 17	175.3	20.7	 16
 61	 17	238.0	28.9	 16
 62	 17	122.8	17.8	 16
 63	 17	1039.3	110.9	 16
 64	 17	226.3	23.3	 16
 65	 17	121.3	23.1	 16
 66	 17	110.5	14.3	 16
 67	 17	240.5	30.5	 16
 68	 17	348.5	30.8	 16
 69	 17	484.8	24.2	 16
 70	 17	475.0	34.5	 16
 71	 17	253.0	40.6	 16
 72	 17	199.5	26.3	 16
 73	 17	115.8	15.9	 16
 74	 17	191.3	17.9	 16
 75	 17	138.0	14.2	 16
 76	 17	716.0	90.4	 16
 77	 17	160.8	24.1	 16
 78	 17	536.3	100.0	 16
 79	 17	213.3	31.7	 16
 80	 17	179.3	32.1	 16
 81	 17	106.3	13.0	 16
 82	 17	94.8	17.7	 16
 83	 17	288.3	21.9	 16
 84	 17	92.5	10.9	 16
 85	 17	107.8	17.5	 16
 86	 17	100.0	16.1	 16
 87	 17	134.3	19.7	 16
 88	 17	330.0	30.7	 16
 89	 17	690.3	61.7	 16
 90	 17	179.8	24.9	 16
 91	 17	319.0	44.6	 16
 92	 17	221.8	31.2	 16
 93	 17	237.5	29.0	 16
 94	 17	113.0	13.8	 16
 95	 17	171.8	18.4	 16
 96	 17	540.5	59.3	 16
 97	 17	1452.5	158.4	 16
 98	 17	161.3	23.1	 16
 99	 17	388.0	52.8	 16
100	 17	1089.0	102.5	 16
101	 17	270.8	38.7	 16
102	 17	159.3	18.1	 16
103	 17	116.5	19.7	 16
104	 17	123.3	20.0	 16
105	 17	266.8	33.0	 16
106	 17	115.0	17.8	 16
107	 17	115.0	17.9	 16
108	 17	145.3	17.6	 16
109	 17	190.3	19.2	 16
110	 17	329.5	24.5	 16
111	 17	167.0	20.7	 16
112	 17	172.3	16.4	 16
113	 17	287.5	32.4	 16
114	 17	129.5	26.6	 16
115	 17	339.5	51.5	 16
116	 17	325.0	35.3	 16
117	 17	221.0	31.5	 16
118	 17	242.3	33.0	 16
119	 17	196.5	18.4	 16
120	 17	120.0	22.0	 16
121	 17	99.3	10.8	 16
122	 17	131.5	22.7	 16
123	 17	113.8	19.8	 16
124	 17	194.0	27.0	 16
125	 17	172.5	23.8	 16
126	 17	263.8	28.5	 16
127	 17	134.8	18.8	 16
128	 17	105.5	18.1	 16
129	 17	165.8	21.7	 16
130	 17	126.0	25.4	 16
131	 17	202.8	28.4	 16
132	 17	123.0	14.7	 16
133	 17	142.5	21.7	 16
134	 17	134.0	17.2	 16
135	 17	144.5	18.7	 16
136	 17	120.3	21.3	 16
137	 17	164.3	25.5	 16
138	 17	118.8	12.5	 16
139	 17	115.5	37.3	 16
140	 17	144.5	19.8	 16
141	 17	86.0	13.2	 20
142	 17	383.8	62.4	 16
143	 17	123.0	16.1	 16
144	 17	107.3	11.7	 16
145	 17	131.3	17.9	 16
146	 17	149.3	22.3	 16
147	 17	101.3	18.9	 16
148	 17	187.5	17.4	 16
149	 17	117.3	14.6	 16
150	 17	114.0	19.3	 16
151	 17	102.5	16.5	 16
152	 17	147.8	19.9	 16
153	 17	153.5	20.2	 16
154	 17	209.3	19.1	 16
155	 17	131.8	19.4	 16
156	 17	117.3	18.1	 16
157	 17	735.8	40.6	 16
158	 17	158.5	13.4	 16
159	 17	206.3	29.2	 16
160	 17	175.5	17.8	 16
161	 17	191.3	17.1	 16
162	 17	253.3	33.7	 16
163	 17	131.0	19.3	 16
164	 17	166.8	20.1	 16
165	 17	108.0	14.5	 16
166	 17	128.5	14.1	 16
167	 17	122.0	18.1	 16
168	 17	233.0	27.0	 16
169	 17	201.3	25.3	 16
170	 17	557.0	85.6	 16
171	 17	128.0	18.0	 16
172	 17	346.0	41.9	 16
173	 17	215.8	22.8	 16
174	 17	245.5	24.2	 16
175	 17	195.0	25.7	 16
176	 17	408.0	42.4	 16
177	 17	327.8	24.8	 16
178	 17	680.5	53.7	 16
179	 17	356.8	32.5	 16
180	 17	255.0	29.0	 16
181	 17	163.5	24.2	 16
182	 17	238.5	27.4	 16
183	 17	169.3	20.8	 16
184	 17	123.3	18.2	 16
185	 17	105.5	16.4	 16
186	 17	161.0	20.7	 16
187	 17	1332.8	154.4	 16
188	 17	84.8	15.1	 16
189	 17	112.5	17.2	 16
190	 17	85.5	12.5	 16
191	 17	168.5	27.5	 16
192	 17	103.0	17.3	 16
193	 17	236.0	24.9	 16
194	 17	1872.8	60.6	 16
195	 17	178.5	24.0	 16
196	 17	117.3	20.9	 16
197	 17	87.5	17.0	 16
198	 17	255.3	41.2	 16
199	 17	233.8	32.3	 16
200	 17	286.3	43.9	 16
201	 17	118.5	17.3	 16
202	 17	192.8	19.3	 16
203	 17	160.0	19.7	 16
204	 17	115.0	15.2	 16
205	 17	98.5	10.6	 16
206	 17	104.3	15.2	 16
207	 17	122.5	15.7	 16
208	 17	117.3	15.7	 16
209	 17	98.5	17.9	 16
210	 17	182.3	32.2	 16
211	 17	97.8	13.4	 16
212	 17	288.3	26.0	 16
213	 17	151.5	21.9	 16
214	 17	146.3	20.3	 16
215	 17	90.8	13.5	 16
216	 17	86.0	11.9	 16
217	 17	222.8	25.8	 16
218	 17	76.0	12.6	 16
219	 17	91.0	12.6	 16
220	 17	156.3	20.8	 16
221	 17	92.3	14.9	 16
222	 17	104.3	15.1	 16
223	 17	92.0	12.9	 16
224	 17	118.0	18.3	 16
225	 17	83.5	13.9	 16
226	 17	90.3	15.7	 16
227	 17	86.8	16.6	 16
228	 17	247.0	30.9	 16
229	 17	254.5	36.2	 16
230	 17	99.8	17.6	 16
231	 17	325.0	29.7	 16
232	 17	158.5	24.6	 16
233	 17	996.3	136.8	 16
234	 17	314.3	33.4	 16
235	 17	156.5	16.4	 16
236	 17	95.0	14.1	 16
237	 17	143.5	18.3	 16
238	 17	74.0	10.5	 16
239	 17	168.3	20.5	 16
240	 17	103.5	13.1	 16
241	 17	245.0	37.0	 16
242	 17	176.0	25.2	 16
243	 17	284.8	33.1	 16
244	 17	91.5	16.3	 16
245	 17	397.5	78.5	 16
246	 17	158.8	35.3	 16
247	 17	102.3	12.4	 16
248	 17	110.3	14.9	 16
249	 17	155.3	25.7	 16
250	 17	240.3	35.0	 16
251	 17	235.8	33.8	 16
252	 17	109.3	13.2	 16
253	 17	334.0	57.6	 16
254	 17	132.8	17.3	 16
255	 17	85.8	16.7	 16
256	 17	184.3	23.7	 16
257	 17	185.3	22.6	 16
258	 17	319.3	42.9	 16
259	 17	156.0	20.2	 16
260	 17	162.8	19.7	 16
261	 17	466.5	125.0	 16
262	 17	134.3	18.0	 16
263	 17	89.3	13.2	 16
264	 17	100.5	13.1	 16
265	 17	117.3	19.1	 16
266	 17	126.5	15.2	 16
267	 17	123.3	25.6	 16
268	 17	170.3	20.6	 16
269	 17	271.8	40.5	 16
270	 17	187.8	28.0	 16
271	 17	201.3	43.8	 16
272	 17	208.3	41.9	 16
273	 17	127.0	17.3	 16
274	 17	83.8	10.9	 16
275	 17	414.8	88.0	 16
276	 17	118.8	17.6	 16
277	 17	214.3	33.6	 16
278	 17	148.3	18.7	 16
279	 17	165.0	23.7	 16
280	 17	96.5	20.6	 16
281	 17	95.8	15.7	 16
282	 17	122.0	18.0	 16
283	 17	85.3	16.3	 20
284	 17	116.3	27.0	 16
285	 17	104.0	18.7	 16
286	 17	118.5	18.3	 16
287	 17	171.0	22.9	 16
288	 17	112.3	11.7	 16
289	 17	99.5	18.0	 16
290	 17	206.8	23.7	 16
291	 17	106.8	12.0	 16
292	 17	118.0	12.4	 16
293	 17	97.5	14.7	 16
294	 17	73.5	13.4	 16
295	 17	109.8	23.9	 16
296	 17	104.3	17.4	 16
297	 17	95.0	15.1	 16
298	 17	128.5	25.4	 16
299	 17	105.5	17.6	 16
300	 17	202.3	26.8	 16
301	 17	169.3	15.6	 16
302	 17	312.5	43.0	 16
303	 17	234.5	28.3	 16
304	 17	143.8	19.7	 16
305	 17	215.3	26.1	 16
306	 17	213.3	32.5	 16
307	 17	5890.5	394.9	 16
308	 17	5740.3	316.9	 16
309	 17	4805.8	549.6	 16
310	 17	141.0	22.3	 16
311	 17	98.3	13.4	 16
312	 17	153.0	21.9	 16
313	 17	232.5	23.3	 16
314	 17	151.0	22.0	 16
315	 17	205.3	17.6	 16
316	 17	755.5	61.3	 16
317	 17	126.0	20.8	 16
318	 17	142.0	22.1	 16
319	 17	91.0	16.4	 16
320	 17	108.5	17.5	 16
321	 17	101.3	13.3	 16
322	 17	139.5	20.8	 16
323	 17	96.8	15.5	 16
324	 17	102.3	14.2	 16
325	 17	76.3	10.3	 16
326	 17	82.5	15.4	 16
327	 17	105.5	15.0	 16
328	 17	97.3	19.6	 16
329	 17	91.8	15.5	 16
330	 17	313.8	44.3	 16
331	 17	154.3	23.6	 16
332	 17	265.8	52.2	 16
333	 17	195.5	20.3	 16
334	 17	98.0	17.2	 16
335	 17	293.3	47.0	 16
336	 17	161.3	24.7	 16
337	 17	108.5	21.2	 16
338	 17	220.0	32.3	 16
339	 17	1246.5	179.0	 16
340	 17	110.5	13.2	 16
341	 17	87.0	15.3	 16
342	 17	250.0	26.3	 16
343	 17	132.3	15.1	 16
344	 17	242.8	32.2	 16
345	 17	205.5	25.8	 16
346	 17	226.5	30.0	 16
347	 17	120.3	21.7	 16
348	 17	221.8	30.4	 16
349	 17	134.0	30.4	 16
350	 17	90.0	19.0	 16
351	 17	107.0	20.3	 16
352	 17	1126.3	62.1	 16
353	 17	84.0	10.8	 16
354	 17	139.5	16.7	 16
355	 17	107.3	15.7	 16
356	 17	248.3	44.6	 16
357	 17	141.0	19.9	 16
358	 17	121.0	19.2	 16
359	 17	115.5	23.2	 16
360	 17	117.3	19.0	 16
361	 17	138.5	23.0	 16
362	 17	128.3	15.3	 16
363	 17	164.3	19.6	 16
364	 17	121.5	16.4	 16
365	 17	348.8	77.3	 16
366	 17	198.8	20.4	 16
367	 17	93.3	9.6	 16
368	 17	79.5	11.7	 16
369	 17	317.3	35.2	 16
370	 17	94.0	12.8	 16
371	 17	75.5	13.1	 16
372	 17	95.3	9.3	 16
373	 17	85.5	14.1	 16
374	 17	85.8	12.2	 16
375	 17	130.0	19.7	 16
376	 17	236.3	27.0	 16
377	 17	150.0	23.5	 16
378	 17	107.8	14.2	 16
379	 17	81.3	12.8	 16
380	 17	98.3	20.8	 16
381	 17	115.5	14.1	 16
382	 17	72.3	10.9	 16
383	 17	162.0	20.0	 16
384	 17	147.5	23.9	 16
385	 17	468.8	49.9	 16
386	 17	159.0	17.9	 16
387	 17	249.0	39.1	 16
388	 17	80.5	13.2	 16
389	 17	161.8	23.6	 16
390	 17	85.3	13.7	 16
391	 17	103.3	13.2	 16
392	 17	88.3	8.9	 16
393	 17	119.5	14.7	 16
394	 17	123.8	16.7	 16
395	 17	243.3	22.4	 16
396	 17	105.3	16.1	 16
397	 17	89.0	15.2	 16
398	 17	105.0	16.4	 16
399	 17	107.8	20.6	 16
400	 17	102.0	17.5	 16
401	 17	108.0	17.6	 16
402	 17	148.0	17.8	 16
403	 17	133.3	18.0	 16
404	 17	137.0	22.3	 16
405	 17	102.5	14.1	 16
406	 17	111.0	17.3	 16
407	 17	317.5	76.4	 16
408	 17	78.8	16.9	 16
409	 17	85.3	14.9	 16
410	 17	77.3	14.7	 16
411	 17	102.0	14.6	 16
412	 17	143.5	27.6	 16
413	 17	98.5	17.3	 16
414	 17	187.5	23.7	 16
415	 17	105.0	13.4	 16
416	 17	80.5	16.1	 16
417	 17	90.3	15.5	 16
418	 17	313.0	70.4	 16
419	 17	78.5	6.7	 16
420	 17	332.5	79.9	 16
421	 17	98.0	14.5	 16
422	 17	114.5	20.0	 16
423	 17	146.0	26.8	 16
424	 17	167.5	20.0	 16
425	 17	153.3	25.4	 20
426	 17	410.0	35.9	 16
427	 17	273.8	22.8	 16
428	 17	81.8	14.8	 16
429	 17	86.5	11.2	 16
430	 17	262.3	36.8	 16
431	 17	325.0	29.2	 16
432	 17	197.5	30.4	 16
433	 17	88.5	17.6	 16
434	 17	148.8	28.0	 16
435	 17	89.5	12.3	 16
436	 17	121.3	24.1	 16
437	 17	136.3	28.5	 16
438	 17	169.3	26.9	 16
439	 17	78.3	10.4	 16
440	 17	308.3	30.2	 16
441	 17	213.5	33.5	 16
442	 17	193.8	22.0	 16
443	 17	217.5	26.2	 16
444	 17	235.5	36.3	 16
445	 17	136.3	16.7	 16
446	 17	126.5	24.0	 16
447	 17	137.3	18.9	 16
448	 17	109.8	23.8	 16
449	 17	86.8	14.5	 16
450	 17	97.5	12.3	 16
451	 17	92.3	17.8	 16
452	 17	294.8	27.1	 16
453	 17	158.0	23.6	 16
454	 17	105.3	10.4	 16
455	 17	127.8	17.6	 16
456	 17	134.0	27.9	 16
457	 17	78.0	21.4	 16
458	 17	78.5	12.6	 16
459	 17	113.5	18.6	 16
460	 17	172.0	48.3	 16
461	 17	103.3	20.8	 16
462	 17	140.3	18.6	 16
463	 17	192.3	30.7	 16
464	 17	776.0	68.4	 16
465	 17	313.5	41.2	 16
466	 17	82.5	15.7	 16
467	 17	152.3	16.2	 16
468	 17	113.5	10.1	 16
469	 17	101.0	23.9	 16
470	 17	135.5	17.3	 16
471	 17	74.8	15.9	 16
472	 17	118.0	16.6	 16
473	 17	76.0	13.5	 16
474	 17	116.0	21.8	 16
475	 17	249.0	49.6	 16
476	 17	120.8	14.3	 16
477	 17	93.0	14.5	 16
478	 17	254.0	33.0	 16
479	 17	408.3	45.1	 16
480	 17	183.0	31.3	 16
481	 17	117.5	16.7	 16
482	 17	259.3	26.7	 16
483	 17	252.8	28.8	 16
484	 17	123.0	15.3	 16
485	 17	299.8	28.2	 16
486	 17	105.3	13.9	 16
487	 17	364.3	26.5	 16
488	 17	93.3	15.5	 16
489	 17	103.5	14.8	 16
490	 17	85.3	15.6	 16
491	 17	133.5	22.8	 16
492	 17	86.5	9.1	 16
493	 17	185.0	21.1	 16
494	 17	514.0	46.2	 16
495	 17	300.8	31.3	 16
496	 17	139.3	21.3	 16
497	 17	132.0	19.8	 16
498	 17	170.3	19.5	 16
499	 17	116.0	8.5	 16
500	 17	115.0	17.9	 16
501	 17	197.3	29.9	 16
502	 17	124.3	16.8	 16
503	 17	193.0	25.5	 16
504	 17	126.0	19.2	 16
505	 17	78.5	16.1	 16
506	 17	70.3	11.5	 16
507	 17	73.0	12.2	 16
508	 17	78.8	10.8	 16
509	 17	82.5	9.1	 16
510	 17	173.8	25.1	 16
511	 17	205.5	19.0	 16
512	 17	81.0	16.8	 16
513	 17	92.5	13.2	 16
514	 17	97.0	18.9	 16
515	 17	194.5	27.2	 16
516	 17	158.3	17.3	 16
517	 17	95.3	13.5	 16
518	 17	128.0	15.3	 16
519	 17	90.0	12.4	 16
520	 17	96.0	15.4	 16
521	 17	97.3	16.7	 16
522	 17	115.0	16.9	 16
523	 17	184.8	31.0	 16
524	 17	86.5	18.0	 16
525	 17	104.3	13.6	 16
526	 17	244.0	39.5	 16
527	 17	85.0	10.6	 16
528	 17	156.8	24.4	 16
529	 17	106.8	16.1	 16
530	 17	119.5	18.0	 16
531	 17	226.5	27.3	 16
532	 17	73.3	11.6	 16
533	 17	91.3	8.3	 16
534	 17	111.3	18.4	 16
535	 17	71.8	9.6	 16
536	 17	80.5	12.0	 16
537	 17	93.5	15.8	 16
538	 17	89.0	18.1	 16
539	 17	93.3	13.0	 16
540	 17	144.3	14.5	 16
541	 17	156.8	16.8	 16
542	 17	207.8	24.9	 16
543	 17	150.5	14.8	 16
544	 17	107.0	12.5	 16
545	 17	125.5	19.3	 16
546	 17	116.5	15.3	 16
547	 17	114.3	17.5	 16
548	 17	132.0	20.0	 16
549	 17	124.8	18.4	 16
550	 17	196.3	21.6	 16
551	 17	199.3	22.7	 16
552	 17	418.5	95.6	 16
553	 17	301.3	68.0	 16
554	 17	297.5	56.3	 16
555	 17	357.0	69.0	 16
556	 17	139.3	24.6	 16
557	 17	97.0	16.8	 16
558	 17	192.5	28.3	 16
559	 17	832.8	102.6	 16
560	 17	141.3	37.4	 16
561	 17	87.0	13.2	 16
562	 17	93.0	15.8	 16
563	 17	195.8	29.1	 16
564	 17	1004.0	227.6	 16
565	 17	114.5	12.0	 16
566	 17	98.5	15.7	 16
567	 17	113.3	17.9	 16
568	 17	111.5	17.5	 20
569	 17	336.5	59.4	 16
570	 17	86.3	12.1	 16
571	 17	97.0	16.3	 16
572	 17	80.3	12.3	 16
573	 17	166.0	18.9	 16
574	 17	132.0	19.4	 16
575	 17	413.8	42.2	 16
576	 17	286.0	37.0	 16
577	 17	120.3	20.7	 16
578	 17	140.5	12.7	 16
579	 17	250.8	29.7	 16
580	 17	923.3	96.3	 16
581	 17	293.0	42.4	 16
582	 17	308.3	29.6	 16
583	 17	143.3	20.0	 16
584	 17	1033.3	110.1	 16
585	 17	411.3	22.1	 16
586	 17	134.8	23.8	 16
587	 17	122.0	21.2	 16
588	 17	102.0	15.4	 16
589	 17	150.8	27.6	 16
590	 17	314.8	52.8	 16
591	 17	113.3	17.3	 16
592	 17	104.0	21.5	 16
593	 17	471.5	81.7	 16
594	 17	117.8	14.8	 16
595	 17	131.3	22.2	 16
596	 17	390.5	31.8	 16
597	 17	325.5	31.6	 16
598	 17	144.0	28.4	 16
599	 17	174.5	16.0	 16
600	 17	186.5	34.1	 16
601	 17	444.0	68.5	 16
602	 17	1089.8	136.8	 16
603	 17	191.3	33.9	 16
604	 17	280.5	57.1	 16
605	 17	167.3	24.6	 16
606	 17	141.0	17.6	 16
607	 17	99.8	14.7	 16
608	 17	178.8	22.6	 16
609	 17	104.5	12.1	 16
610	 17	107.0	13.1	 16
611	 17	232.8	28.5	 16
612	 17	99.3	15.8	 16
613	 17	86.8	13.0	 16
614	 17	120.0	48.6	 16
615	 17	523.0	75.8	 16
616	 17	153.5	23.5	 16
617	 17	172.3	24.6	 16
618	 17	319.3	42.0	 16
619	 17	281.5	35.9	 16
620	 17	137.8	20.7	 16
621	 17	243.8	37.2	 16
622	 17	368.8	36.6	 16
623	 17	201.8	23.2	 16
624	 17	229.5	32.8	 16
625	 17	182.3	14.7	 16
626	 17	98.5	12.7	 16
627	 17	143.3	17.9	 16
628	 17	191.3	25.9	 16
629	 17	179.3	29.0	 16
630	 17	187.8	25.5	 16
631	 17	120.5	15.1	 16
632	 17	101.3	17.9	 16
633	 17	161.5	20.4	 16
634	 17	187.0	38.9	 16
635	 17	222.3	24.0	 16
636	 17	90.8	13.9	 16
637	 17	87.5	13.6	 16
638	 17	117.3	17.3	 16
639	 17	425.3	45.7	 16
640	 17	206.8	23.0	 16
641	 17	208.3	24.6	 16
642	 17	323.0	40.1	 16
643	 17	180.3	27.5	 16
644	 17	103.3	17.0	 16
645	 17	327.5	54.4	 16
646	 17	189.8	27.4	 16
647	 17	198.5	20.2	 16
648	 17	212.0	38.0	 16
649	 17	180.5	26.3	 16
650	 17	121.3	18.8	 16
651	 17	71.0	12.5	 16
652	 17	145.3	20.4	 16
653	 17	200.0	21.7	 16
654	 17	189.8	24.5	 16
655	 17	109.0	22.6	 16
656	 17	73.0	12.2	 16
657	 17	126.3	19.1	 16
658	 17	84.0	14.3	 16
659	 17	190.3	25.0	 16
660	 17	109.5	19.5	 16
661	 17	162.5	28.5	 16
662	 17	190.3	21.8	 16
663	 17	127.5	16.3	 16
664	 17	89.8	12.8	 16
665	 17	88.3	13.8	 16
666	 17	306.5	21.5	 16
667	 17	155.8	25.2	 16
668	 17	80.8	13.4	 16
669	 17	84.3	20.4	 16
670	 17	91.8	17.5	 16
671	 17	1044.8	210.7	 16
672	 17	1045.5	167.0	 16
673	 17	105.0	18.8	 16
674	 17	189.5	23.0	 16
675	 17	265.3	40.9	 16
676	 17	191.3	26.8	 16
677	 17	266.5	38.6	 16
678	 17	124.5	23.2	 16
679	 17	167.5	18.3	 16
680	 17	201.5	29.2	 16
681	 17	184.8	22.4	 16
682	 17	104.3	11.3	 16
683	 17	114.5	15.9	 16
684	 17	194.5	32.3	 16
685	 17	212.8	24.4	 16
686	 17	144.3	13.8	 16
687	 17	264.0	36.2	 16
688	 17	342.8	57.6	 16
689	 17	110.8	18.7	 16
690	 17	136.5	19.1	 16
691	 17	198.3	33.3	 16
692	 17	196.3	19.4	 16
693	 17	191.0	25.8	 16
694	 17	258.3	54.6	 16
695	 17	99.0	21.7	 16
696	 17	129.3	21.3	 16
697	 17	163.3	20.8	 16
698	 17	265.0	43.6	 16
699	 17	98.3	13.7	 16
700	 17	91.0	22.1	 16
701	 17	129.3	26.7	 16
702	 17	261.0	34.2	 16
703	 17	160.0	30.2	 16
704	 17	153.3	25.0	 16
705	 17	131.3	18.5	 16
706	 17	122.8	23.5	 16
707	 17	152.3	19.3	 16
708	 17	114.8	19.6	 16
709	 17	136.0	23.5	 16
710	 17	129.0	18.4	 20
711	 17	135.0	19.3	 16
  0	 18	4955.5	1468.9	 16
  1	 18	166.0	44.0	 16
  2	 18	103.5	16.9	 20
  3	 18	162.5	19.8	 16
  4	 18	135.5	20.7	 16
  5	 18	249.0	29.7	 16
  6	 18	183.0	25.2	 16
  7	 18	138.3	21.2	 16
  8	 18	149.3	28.8	 16
  9	 18	109.3	16.3	 16
 10	 18	118.3	20.1	 16
 11	 18	113.8	16.9	 16
 12	 18	138.5	21.0	 16
 13	 18	124.3	18.4	 16
 14	 18	111.3	15.9	 16
 15	 18	109.8	16.9	 16
 16	 18	226.3	27.4	 16
 17	 18	123.3	19.3	 16
 18	 18	226.3	33.5	 16
 19	 18	141.3	16.4	 16
 20	 18	171.0	25.6	 16
 21	 18	185.0	29.8	 16
 22	 18	136.5	13.0	 16
 23	 18	111.8	16.7	 16
 24	 18	192.5	18.6	 16
 25	 18	121.3	30.3	 16
 26	 18	116.5	17.2	 16
 27	 18	87.3	14.6	 16
 28	 18	95.5	12.5	 16
 29	 18	89.3	21.6	 16
 30	 18	103.8	18.6	 16
 31	 18	99.3	16.4	 16
 32	 18	104.5	14.8	 16
 33	 18	96.0	16.9	 16
 34	 18	141.8	22.6	 16
 35	 18	194.5	22.2	 16
 36	 18	114.5	14.8	 16
 37	 18	130.5	15.6	 16
 38	 18	110.3	15.4	 16
 39	 18	132.3	28.7	 16
 40	 18	97.3	16.2	 16
 41	 18	117.3	18.0	 16
 42	 18	102.8	20.3	 16
 43	 18	115.3	14.0	 16
 44	 18	178.0	23.2	 16
 45	 18	387.0	34.9	 16
 46	 18	150.8	16.7	 16
 47	 18	144.3	19.6	 16
 48	 18	123.8	27.1	 16
 49	 18	123.5	20.6	 16
 50	 18	105.8	12.7	 16
 51	 18	133.8	16.5	 16
 52	 18	127.0	14.1	 16
 53	 18	106.5	16.7	 16
 54	 18	107.5	19.1	 16
 55	 18	106.5	19.2	 16
 56	 18	198.3	44.4	 16
 57	 18	98.0	11.7	 16
 58	 18	102.5	13.9	 16
 59	 18	113.3	14.3	 16
 60	 18	136.8	19.6	 16
 61	 18	143.3	21.1	 16
 62	 18	107.0	13.0	 16
 63	 18	259.5	33.9	 16
 64	 18	181.0	14.7	 16
 65	 18	98.0	13.2	 16
 66	 18	142.3	15.1	 16
 67	 18	127.8	17.4	 16
 68	 18	108.8	12.4	 16
 69	 18	313.8	38.8	 16
 70	 18	312.5	33.1	 16
 71	 18	153.8	22.3	 16
 72	 18	142.3	21.0	 16
 73	 18	113.5	20.3	 16
 74	 18	143.3	20.6	 16
 75	 18	109.0	21.4	 16
 76	 18	118.3	19.6	 16
 77	 18	112.5	16.8	 16
 78	 18	161.0	23.3	 16
 79	 18	234.5	24.9	 16
 80	 18	141.8	22.0	 16
 81	 18	114.5	14.2	 16
 82	 18	92.3	13.4	 16
 83	 18	127.5	16.0	 16
 84	 18	100.8	16.6	 16
 85	 18	99.5	14.4	 16
 86	 18	97.5	16.9	 16
 87	 18	127.0	18.3	 16
 88	 18	183.5	20.5	 16
 89	 18	247.5	38.2	 16
 90	 18	154.3	14.8	 16
 91	 18	211.3	19.9	 16
 92	 18	243.8	29.9	 16
 93	 18	262.0	29.1	 16
 94	 18	103.0	14.4	 16
 95	 18	165.3	23.8	 16
 96	 18	462.5	38.3	 16
 97	 18	241.5	29.7	 16
 98	 18	162.0	20.6	 16
 99	 18	193.8	19.8	 16
100	 18	236.5	32.6	 16
101	 18	216.8	20.5	 16
102	 18	185.5	24.2	 16
103	 18	137.0	18.4	 16
104	 18	120.0	21.7	 16
105	 18	168.0	23.6	 16
106	 18	118.0	22.8	 16
107	 18	180.5	415.2	 16
108	 18	134.5	16.6	 16
109	 18	167.0	21.7	 16
110	 18	142.3	19.5	 16
111	 18	173.5	22.0	 16
112	 18	249.3	37.0	 16
113	 18	103.5	15.5	 16
114	 18	108.0	15.0	 16
115	 18	208.5	25.4	 16
116	 18	320.3	40.6	 16
117	 18	199.5	20.5	 16
118	 18	188.8	32.2	 16
119	 18	164.5	18.8	 16
120	 18	119.0	18.1	 16
121	 18	115.5	19.7	 16
122	 18	107.0	15.3	 16
123	 18	132.8	15.7	 16
124	 18	152.3	22.3	 16
125	 18	148.8	19.3	 16
126	 18	330.5	33.6	 16
127	 18	141.5	20.7	 16
128	 18	129.5	31.9	 16
129	 18	119.0	14.3	 16
130	 18	107.0	15.0	 16
131	 18	168.5	22.2	 16
132	 18	111.3	14.6	 16
133	 18	115.3	17.9	 16
134	 18	120.3	23.8	 16
135	 18	103.3	13.0	 16
136	 18	115.5	15.8	 16
137	 18	117.3	21.0	 16
138	 18	120.8	20.4	 16
139	 18	84.0	12.4	 16
140	 18	95.5	14.9	 16
141	 18	84.3	18.0	 16
142	 18	117.3	11.6	 16
143	 18	86.3	10.3	 16
144	 18	106.8	16.4	 16
145	 18	119.5	16.3	 20
146	 18	125.5	17.2	 16
147	 18	92.8	17.5	 16
148	 18	141.3	17.9	 16
149	 18	110.8	18.4	 16
150	 18	115.3	17.0	 16
151	 18	108.3	17.6	 16
152	 18	125.3	17.5	 16
153	 18	147.5	15.3	 16
154	 18	155.5	14.1	 16
155	 18	150.3	17.0	 16
156	 18	132.5	18.3	 16
157	 18	223.5	20.8	 16
158	 18	118.3	18.1	 16
159	 18	126.0	21.1	 16
160	 18	219.5	40.3	 16
161	 18	146.0	17.1	 16
162	 18	206.3	18.7	 16
163	 18	130.5	22.7	 16
164	 18	135.3	18.0	 16
165	 18	107.0	15.9	 16
166	 18	134.0	21.6	 16
167	 18	110.3	18.0	 16
168	 18	114.3	14.1	 16
169	 18	122.0	17.8	 16
170	 18	171.0	24.3	 16
171	 18	108.3	17.9	 16
172	 18	325.5	33.2	 16
173	 18	197.3	19.7	 16
174	 18	221.5	30.5	 16
175	 18	291.0	86.8	 16
176	 18	750.0	70.1	 16
177	 18	418.0	35.9	 16
178	 18	707.5	64.5	 16
179	 18	426.3	32.2	 16
180	 18	208.0	23.2	 16
181	 18	142.0	19.2	 16
182	 18	273.5	25.5	 16
183	 18	169.5	19.0	 16
184	 18	125.8	19.3	 16
185	 18	82.8	16.2	 16
186	 18	117.8	21.2	 16
187	 18	113.8	19.5	 16
188	 18	87.0	16.7	 16
189	 18	104.3	15.5	 16
190	 18	80.8	12.3	 16
191	 18	113.5	19.2	 16
192	 18	107.0	16.9	 16
193	 18	225.3	29.3	 16
194	 18	1311.0	65.8	 16
195	 18	209.3	17.8	 16
196	 18	96.5	16.3	 16
197	 18	85.5	13.4	 16
198	 18	107.0	13.5	 16
199	 18	174.8	27.0	 16
200	 18	171.3	17.0	 16
201	 18	137.8	20.1	 16
202	 18	114.5	15.3	 16
203	 18	148.3	15.0	 16
204	 18	101.0	13.9	 16
205	 18	130.0	17.8	 16
206	 18	148.5	19.1	 16
207	 18	88.5	16.2	 16
208	 18	87.0	17.0	 16
209	 18	81.3	12.5	 16
210	 18	159.5	24.9	 16
211	 18	105.5	16.0	 16
212	 18	139.3	15.4	 16
213	 18	104.0	11.3	 16
214	 18	107.5	11.9	 16
215	 18	92.8	12.5	 16
216	 18	83.0	13.0	 16
217	 18	97.0	12.9	 16
218	 18	89.3	12.0	 16
219	 18	86.0	13.1	 16
220	 18	133.0	24.0	 16
221	 18	84.3	13.9	 16
222	 18	103.3	17.0	 16
223	 18	107.8	27.0	 16
224	 18	85.8	12.2	 16
225	 18	81.3	14.3	 16
226	 18	95.0	11.4	 16
227	 18	76.3	11.2	 16
228	 18	113.0	18.7	 16
229	 18	127.0	17.5	 16
230	 18	105.0	16.4	 16
231	 18	419.0	45.9	 16
232	 18	144.3	19.9	 16
233	 18	340.8	39.5	 16
234	 18	293.3	33.3	 16
235	 18	105.0	12.6	 16
236	 18	100.5	12.1	 16
237	 18	166.3	21.4	 16
238	 18	82.0	16.8	 16
239	 18	146.3	20.7	 16
240	 18	97.8	17.8	 16
241	 18	100.0	18.1	 16
242	 18	210.5	24.0	 16
243	 18	394.3	34.8	 16
244	 18	119.8	13.7	 16
245	 18	160.8	18.2	 16
246	 18	103.0	14.3	 16
247	 18	97.0	19.0	 16
248	 18	124.5	21.9	 16
249	 18	106.3	18.5	 16
250	 18	93.8	12.9	 16
251	 18	84.8	14.5	 16
252	 18	89.0	12.4	 16
253	 18	99.3	21.3	 16
254	 18	114.5	17.1	 16
255	 18	106.3	13.7	 16
256	 18	171.0	21.3	 16
257	 18	121.3	13.1	 16
258	 18	307.0	34.3	 16
259	 18	135.0	24.2	 16
260	 18	132.0	18.2	 16
261	 18	656.0	60.3	 16
262	 18	164.0	29.5	 16
263	 18	101.5	14.5	 16
264	 18	82.3	16.7	 16
265	 18	112.3	15.4	 16
266	 18	132.3	21.4	 16
267	 18	118.0	14.7	 16
268	 18	129.8	16.4	 16
269	 18	271.8	31.4	 16
270	 18	163.3	31.1	 16
271	 18	114.3	15.1	 16
272	 18	110.3	12.4	 16
273	 18	75.3	13.5	 16
274	 18	95.5	14.0	 16
275	 18	136.3	21.5	 16
276	 18	132.0	16.2	 16
277	 18	133.0	13.9	 16
278	 18	110.8	20.0	 16
279	 18	118.0	17.6	 16
280	 18	84.5	12.3	 16
281	 18	91.5	16.2	 16
282	 18	100.0	15.1	 16
283	 18	85.8	15.4	 16
284	 18	96.8	15.6	 16
285	 18	77.5	13.4	 16
286	 18	104.0	17.9	 16
287	 18	129.3	20.2	 20
288	 18	96.0	10.8	 16
289	 18	104.8	14.4	 16
290	 18	185.5	25.0	 16
291	 18	143.5	22.8	 16
292	 18	121.3	23.0	 16
293	 18	77.3	10.9	 16
294	 18	87.0	15.3	 16
295	 18	80.5	12.5	 16
296	 18	94.5	16.8	 16
297	 18	105.3	17.5	 16
298	 18	89.0	11.5	 16
299	 18	104.5	14.1	 16
300	 18	101.0	10.4	 16
301	 18	122.0	16.6	 16
302	 18	113.5	21.6	 16
303	 18	128.0	21.3	 16
304	 18	130.8	20.5	 16
305	 18	102.5	15.5	 16
306	 18	113.0	15.6	 16
307	 18	757.5	96.4	 16
308	 18	807.5	102.9	 16
309	 18	591.5	93.0	 16
310	 18	95.3	13.5	 16
311	 18	91.3	13.9	 16
312	 18	145.3	17.3	 16
313	 18	207.3	24.8	 16
314	 18	144.8	20.8	 16
315	 18	249.3	38.5	 16
316	 18	555.5	39.4	 16
317	 18	108.0	13.6	 16
318	 18	119.0	19.5	 16
319	 18	82.3	15.4	 16
320	 18	86.8	10.4	 16
321	 18	106.5	15.9	 16
322	 18	120.3	14.1	 16
323	 18	90.3	12.4	 16
324	 18	88.8	9.9	 16
325	 18	79.0	12.9	 16
326	 18	84.3	14.7	 16
327	 18	89.5	17.4	 16
328	 18	82.3	13.5	 16
329	 18	91.8	12.0	 16
330	 18	130.5	21.1	 16
331	 18	147.0	19.0	 16
332	 18	109.5	16.9	 16
333	 18	127.0	15.9	 16
334	 18	107.3	15.0	 16
335	 18	152.3	17.9	 16
336	 18	119.3	11.0	 16
337	 18	87.3	12.2	 16
338	 18	143.8	15.2	 16
339	 18	490.8	72.7	 16
340	 18	114.5	11.2	 16
341	 18	71.3	11.6	 16
342	 18	181.5	28.2	 16
343	 18	123.3	20.2	 16
344	 18	159.0	19.0	 16
345	 18	140.3	17.3	 16
346	 18	151.0	21.0	 16
347	 18	226.5	24.0	 16
348	 18	216.5	29.7	 16
349	 18	189.5	25.5	 16
350	 18	89.5	13.8	 16
351	 18	93.8	14.1	 16
352	 18	588.3	40.8	 16
353	 18	89.5	9.0	 16
354	 18	187.3	20.8	 16
355	 18	85.8	11.4	 16
356	 18	96.5	14.8	 16
357	 18	116.5	15.8	 16
358	 18	98.8	14.6	 16
359	 18	116.3	17.3	 16
360	 18	106.5	16.9	 16
361	 18	131.5	23.2	 16
362	 18	97.0	15.5	 16
363	 18	161.0	17.8	 16
364	 18	166.5	12.2	 16
365	 18	126.3	15.3	 16
366	 18	107.3	14.7	 16
367	 18	86.5	7.9	 16
368	 18	61.8	9.0	 16
369	 18	142.0	15.8	 16
370	 18	75.5	9.3	 16
371	 18	86.3	16.7	 16
372	 18	94.8	10.3	 16
373	 18	78.0	7.1	 16
374	 18	86.8	12.9	 16
375	 18	105.0	15.1	 16
376	 18	87.5	15.9	 16
377	 18	118.3	17.4	 16
378	 18	79.5	12.8	 16
379	 18	70.8	15.4	 16
380	 18	106.5	15.3	 16
381	 18	191.0	21.5	 16
382	 18	74.3	12.7	 16
383	 18	124.0	14.3	 16
384	 18	119.5	15.3	 16
385	 18	801.3	44.3	 16
386	 18	228.8	34.6	 16
387	 18	145.3	23.7	 16
388	 18	81.8	12.8	 16
389	 18	165.5	20.8	 16
390	 18	86.3	12.4	 16
391	 18	90.0	10.3	 16
392	 18	80.5	12.1	 16
393	 18	112.5	18.3	 16
394	 18	99.3	15.5	 16
395	 18	191.0	21.7	 16
396	 18	106.0	15.1	 16
397	 18	77.5	14.1	 16
398	 18	90.5	15.0	 16
399	 18	70.0	14.8	 16
400	 18	91.8	12.8	 16
401	 18	89.0	12.2	 16
402	 18	176.5	27.6	 16
403	 18	120.3	17.3	 16
404	 18	244.8	23.7	 16
405	 18	79.3	8.1	 16
406	 18	77.5	11.1	 16
407	 18	124.0	20.0	 16
408	 18	75.3	12.6	 16
409	 18	69.3	9.4	 16
410	 18	64.0	13.1	 16
411	 18	91.5	12.9	 16
412	 18	109.8	17.7	 16
413	 18	102.5	12.6	 16
414	 18	182.3	17.7	 16
415	 18	86.8	14.8	 16
416	 18	71.5	17.6	 16
417	 18	79.0	14.4	 16
418	 18	95.0	17.8	 16
419	 18	86.3	14.7	 16
420	 18	102.3	16.9	 16
421	 18	96.3	17.3	 16
422	 18	187.8	28.8	 16
423	 18	213.3	103.6	 16
424	 18	181.8	17.7	 16
425	 18	114.0	19.9	 16
426	 18	269.5	29.1	 16
427	 18	236.5	28.0	 16
428	 18	95.5	12.9	 16
429	 18	76.5	15.6	 20
430	 18	199.5	30.1	 16
431	 18	332.0	28.4	 16
432	 18	170.5	21.7	 16
433	 18	98.0	20.9	 16
434	 18	91.3	10.8	 16
435	 18	92.5	13.5	 16
436	 18	109.0	19.1	 16
437	 18	88.8	11.1	 16
438	 18	97.5	12.1	 16
439	 18	80.3	15.3	 16
440	 18	114.0	22.8	 16
441	 18	97.3	18.1	 16
442	 18	171.3	23.9	 16
443	 18	227.8	25.8	 16
444	 18	141.8	21.0	 16
445	 18	136.3	20.2	 16
446	 18	114.3	16.4	 16
447	 18	86.0	15.7	 16
448	 18	103.3	17.3	 16
449	 18	85.0	12.0	 16
450	 18	87.5	12.1	 16
451	 18	114.5	19.9	 16
452	 18	249.3	38.0	 16
453	 18	128.5	16.3	 16
454	 18	120.3	20.1	 16
455	 18	123.0	17.9	 16
456	 18	96.3	18.8	 16
457	 18	77.3	12.6	 16
458	 18	99.0	15.6	 16
459	 18	100.8	21.2	 16
460	 18	108.5	18.8	 16
461	 18	101.0	18.5	 16
462	 18	154.5	16.7	 16
463	 18	221.8	27.9	 16
464	 18	194.3	35.2	 16
465	 18	147.8	28.5	 16
466	 18	82.8	10.6	 16
467	 18	215.5	30.0	 16
468	 18	121.8	17.6	 16
469	 18	77.0	11.9	 16
470	 18	109.3	13.3	 16
471	 18	92.5	13.5	 16
472	 18	97.0	13.9	 16
473	 18	92.3	17.5	 16
474	 18	94.8	14.9	 16
475	 18	277.3	35.6	 16
476	 18	121.5	19.0	 16
477	 18	97.3	11.2	 16
478	 18	209.3	21.4	 16
479	 18	251.8	25.5	 16
480	 18	192.0	18.5	 16
481	 18	122.3	21.0	 16
482	 18	263.8	29.3	 16
483	 18	156.0	20.9	 16
484	 18	97.0	10.7	 16
485	 18	263.5	25.6	 16
486	 18	98.3	17.7	 16
487	 18	399.3	37.8	 16
488	 18	82.3	8.6	 16
489	 18	117.5	27.1	 16
490	 18	120.3	22.9	 16
491	 18	93.0	10.7	 16
492	 18	95.5	17.2	 16
493	 18	150.8	15.4	 16
494	 18	395.8	48.8	 16
495	 18	191.5	23.8	 16
496	 18	119.3	20.2	 16
497	 18	91.8	12.3	 16
498	 18	189.5	19.8	 16
499	 18	123.0	23.8	 16
500	 18	98.5	13.9	 16
501	 18	89.3	13.1	 16
502	 18	104.0	9.1	 16
503	 18	122.3	16.5	 16
504	 18	97.0	14.6	 16
505	 18	68.8	11.3	 16
506	 18	77.0	11.1	 16
507	 18	86.3	8.9	 16
508	 18	86.3	12.5	 16
509	 18	100.0	15.4	 16
510	 18	86.3	13.7	 16
511	 18	155.3	18.6	 16
512	 18	79.3	12.2	 16
513	 18	74.0	10.0	 16
514	 18	84.0	13.0	 16
515	 18	136.0	19.6	 16
516	 18	124.5	19.2	 16
517	 18	81.8	14.0	 16
518	 18	98.0	13.0	 16
519	 18	75.3	11.4	 16
520	 18	80.0	13.7	 16
521	 18	86.5	13.8	 16
522	 18	89.0	15.1	 16
523	 18	161.3	20.5	 16
524	 18	67.3	9.9	 16
525	 18	96.3	15.1	 16
526	 18	78.5	13.0	 16
527	 18	82.0	8.9	 16
528	 18	135.8	14.5	 16
529	 18	85.8	16.7	 16
530	 18	75.5	11.3	 16
531	 18	81.5	10.5	 16
532	 18	86.0	17.7	 16
533	 18	93.0	18.6	 16
534	 18	123.3	18.4	 16
535	 18	66.5	10.6	 16
536	 18	82.5	9.4	 16
537	 18	98.8	14.7	 16
538	 18	77.0	8.2	 16
539	 18	93.0	14.4	 16
540	 18	169.5	20.9	 16
541	 18	289.3	40.9	 16
542	 18	226.5	28.3	 16
543	 18	138.0	29.6	 16
544	 18	76.5	11.8	 16
545	 18	131.3	23.2	 16
546	 18	194.5	24.7	 16
547	 18	179.0	18.8	 16
548	 18	129.3	18.0	 16
549	 18	138.0	20.0	 16
550	 18	351.8	45.5	 16
551	 18	132.3	19.5	 16
552	 18	138.0	20.3	 16
553	 18	86.5	12.9	 16
554	 18	119.5	21.4	 16
555	 18	118.3	25.4	 16
556	 18	140.3	23.1	 16
557	 18	98.3	17.5	 16
558	 18	113.5	16.1	 16
559	 18	591.5	105.8	 16
560	 18	153.0	31.8	 16
561	 18	77.3	14.3	 16
562	 18	85.8	15.3	 16
563	 18	202.8	28.5	 16
564	 18	182.8	23.3	 16
565	 18	90.0	18.1	 16
566	 18	84.0	17.2	 16
567	 18	104.5	15.6	 16
568	 18	84.0	12.5	 16
569	 18	98.3	13.0	 16
570	 18	71.5	11.3	 16
571	 18	90.3	16.9	 16
572	 18	106.0	15.7	 20
573	 18	151.8	19.2	 16
574	 18	132.0	10.4	 16
575	 18	435.3	34.6	 16
576	 18	244.0	32.3	 16
577	 18	162.8	23.3	 16
578	 18	134.0	12.6	 16
579	 18	153.3	17.7	 16
580	 18	599.5	60.4	 16
581	 18	295.3	35.1	 16
582	 18	229.5	23.6	 16
583	 18	110.0	13.0	 16
584	 18	300.5	37.8	 16
585	 18	240.0	33.9	 16
586	 18	158.0	16.1	 16
587	 18	92.5	18.8	 16
588	 18	83.0	10.6	 16
589	 18	145.0	23.9	 16
590	 18	155.3	25.8	 16
591	 18	87.0	16.3	 16
592	 18	112.0	16.6	 16
593	 18	90.3	15.4	 16
594	 18	90.3	10.1	 16
595	 18	100.0	16.3	 16
596	 18	450.0	31.6	 16
597	 18	176.8	26.3	 16
598	 18	97.3	10.5	 16
599	 18	165.0	30.2	 16
600	 18	160.0	31.4	 16
601	 18	478.0	35.6	 16
602	 18	1076.0	61.4	 16
603	 18	221.8	19.7	 16
604	 18	217.8	26.4	 16
605	 18	143.0	20.5	 16
606	 18	125.8	12.9	 16
607	 18	110.8	23.4	 16
608	 18	129.5	22.5	 16
609	 18	83.8	13.5	 16
610	 18	72.5	11.8	 16
611	 18	164.3	17.7	 16
612	 18	91.5	16.8	 16
613	 18	96.5	19.7	 16
614	 18	87.3	9.1	 16
615	 18	233.8	28.5	 16
616	 18	211.3	25.2	 16
617	 18	144.3	20.8	 16
618	 18	168.3	16.5	 16
619	 18	113.3	15.9	 16
620	 18	332.8	40.2	 16
621	 18	121.8	11.3	 16
622	 18	392.8	42.6	 16
623	 18	118.5	17.6	 16
624	 18	171.0	20.2	 16
625	 18	374.0	32.2	 16
626	 18	128.0	24.9	 16
627	 18	97.3	18.2	 16
628	 18	313.3	34.3	 16
629	 18	185.8	21.5	 16
630	 18	176.0	13.8	 16
631	 18	129.8	20.6	 16
632	 18	80.0	10.2	 16
633	 18	118.5	18.1	 16
634	 18	108.8	13.0	 16
635	 18	141.3	23.3	 16
636	 18	97.0	11.9	 16
637	 18	100.5	13.7	 16
638	 18	87.3	13.1	 16
639	 18	189.0	23.7	 16
640	 18	128.3	21.8	 16
641	 18	101.8	15.1	 16
642	 18	166.5	27.8	 16
643	 18	155.0	16.4	 16
644	 18	86.0	14.0	 16
645	 18	104.5	22.0	 16
646	 18	101.8	11.5	 16
647	 18	162.0	20.9	 16
648	 18	172.3	22.6	 16
649	 18	153.5	20.2	 16
650	 18	134.5	18.5	 16
651	 18	72.0	11.7	 16
652	 18	114.5	22.1	 16
653	 18	162.5	23.2	 16
654	 18	123.0	11.2	 16
655	 18	85.0	13.6	 16
656	 18	69.3	16.0	 16
657	 18	197.3	33.5	 16
658	 18	77.0	14.9	 16
659	 18	100.0	12.6	 16
660	 18	94.3	15.9	 16
661	 18	82.0	12.1	 16
662	 18	130.3	23.6	 16
663	 18	96.3	21.2	 16
664	 18	92.0	11.3	 16
665	 18	97.0	14.2	 16
666	 18	121.8	16.1	 16
667	 18	81.5	11.3	 16
668	 18	69.5	13.1	 16
669	 18	89.5	12.8	 16
670	 18	89.3	12.2	 16
671	 18	377.8	59.4	 16
672	 18	372.0	63.8	 16
673	 18	91.0	12.6	 16
674	 18	131.8	20.4	 16
675	 18	342.8	47.3	 16
676	 18	127.5	19.0	 16
677	 18	561.3	40.8	 16
678	 18	102.3	22.8	 16
679	 18	138.8	19.9	 16
680	 18	150.3	29.8	 16
681	 18	162.3	24.9	 16
682	 18	92.5	11.7	 16
683	 18	95.3	10.0	 16
684	 18	146.0	17.7	 16
685	 18	164.5	13.1	 16
686	 18	167.3	22.8	 16
687	 18	237.8	29.7	 16
688	 18	285.5	38.1	 16
689	 18	98.3	12.0	 16
690	 18	145.0	20.9	 16
691	 18	115.0	19.7	 16
692	 18	171.3	22.0	 16
693	 18	173.5	20.6	 16
694	 18	89.3	13.3	 16
695	 18	81.5	12.0	 16
696	 18	626.8	91.9	 16
697	 18	138.3	15.9	 16
698	 18	141.5	21.7	 16
699	 18	85.5	15.0	 16
700	 18	83.0	11.8	 16
701	 18	123.5	23.3	 16
702	 18	231.8	31.0	 16
703	 18	87.3	17.0	 16
704	 18	221.8	25.9	 16
705	 18	168.5	26.4	 16
706	 18	121.3	13.5	 16
707	 18	154.5	22.9	 16
708	 18	83.0	20.7	 16
709	 18	103.0	13.9	 16
710	 18	465.3	79.0	 16
711	 18	7532.0	1782.2	 16
  0	 19	153.5	24.2	 16
  1	 19	155.0	17.8	 16
  2	 19	150.8	19.4	 16
  3	 19	321.0	50.3	 16
  4	 19	217.8	32.4	 16
  5	 19	181.3	39.4	 16
  6	 19	127.0	15.6	 20
  7	 19	135.3	21.6	 16
  8	 19	148.3	18.2	 16
  9	 19	104.5	17.7	 16
 10	 19	123.8	17.2	 16
 11	 19	195.8	35.2	 16
 12	 19	221.8	22.4	 16
 13	 19	177.3	19.6	 16
 14	 19	197.3	25.6	 16
 15	 19	215.3	20.9	 16
 16	 19	290.0	36.0	 16
 17	 19	243.5	28.6	 16
 18	 19	233.5	30.8	 16
 19	 19	184.8	24.7	 16
 20	 19	134.0	14.7	 16
 21	 19	183.5	20.3	 16
 22	 19	222.3	24.4	 16
 23	 19	277.0	43.3	 16
 24	 19	357.5	52.6	 16
 25	 19	176.5	32.7	 16
 26	 19	120.5	14.5	 16
 27	 19	416.5	63.2	 16
 28	 19	105.0	14.9	 16
 29	 19	115.0	22.2	 16
 30	 19	110.0	16.6	 16
 31	 19	220.0	21.5	 16
 32	 19	106.5	12.7	 16
 33	 19	113.5	18.3	 16
 34	 19	173.0	23.8	 16
 35	 19	249.5	25.6	 16
 36	 19	274.0	29.2	 16
 37	 19	179.0	26.4	 16
 38	 19	2036.5	261.3	 16
 39	 19	413.8	29.6	 16
 40	 19	189.5	26.7	 16
 41	 19	118.5	15.6	 16
 42	 19	120.0	13.6	 16
 43	 19	146.8	18.8	 16
 44	 19	464.3	58.4	 16
 45	 19	184.3	44.5	 16
 46	 19	217.3	29.8	 16
 47	 19	302.3	37.0	 16
 48	 19	308.3	19.6	 16
 49	 19	793.5	108.1	 16
 50	 19	126.0	12.4	 16
 51	 19	224.8	33.4	 16
 52	 19	142.8	18.2	 16
 53	 19	277.5	26.7	 16
 54	 19	108.3	13.5	 16
 55	 19	298.3	37.6	 16
 56	 19	460.0	66.7	 16
 57	 19	168.3	22.9	 16
 58	 19	234.5	27.6	 16
 59	 19	293.3	28.4	 16
 60	 19	260.3	68.9	 16
 61	 19	310.0	38.9	 16
 62	 19	176.3	21.4	 16
 63	 19	306.8	26.0	 16
 64	 19	320.3	32.2	 16
 65	 19	221.3	27.8	 16
 66	 19	182.0	26.0	 16
 67	 19	143.5	29.7	 16
 68	 19	157.8	21.0	 16
 69	 19	224.0	29.6	 16
 70	 19	531.0	47.9	 16
 71	 19	711.3	66.5	 16
 72	 19	293.5	40.7	 16
 73	 19	252.8	28.1	 16
 74	 19	276.0	38.2	 16
 75	 19	137.5	22.5	 16
 76	 19	132.0	18.1	 16
 77	 19	396.3	73.5	 16
 78	 19	149.8	35.3	 16
 79	 19	126.5	20.2	 16
 80	 19	142.5	21.0	 16
 81	 19	145.3	17.8	 16
 82	 19	144.8	34.7	 16
 83	 19	466.8	69.4	 16
 84	 19	149.8	20.4	 16
 85	 19	271.0	33.2	 16
 86	 19	164.5	23.5	 16
 87	 19	1806.8	169.9	 16
 88	 19	200.5	23.0	 16
 89	 19	121.5	10.4	 16
 90	 19	664.8	74.4	 16
 91	 19	188.8	25.2	 16
 92	 19	99.5	16.3	 16
 93	 19	126.3	19.1	 16
 94	 19	151.3	24.3	 16
 95	 19	250.0	29.9	 16
 96	 19	818.8	102.8	 16
 97	 19	157.0	16.9	 16
 98	 19	149.8	19.0	 16
 99	 19	123.0	16.7	 16
100	 19	370.5	385.1	 16
101	 19	157.3	23.9	 16
102	 19	573.5	33.4	 16
103	 19	359.8	38.5	 16
104	 19	232.3	26.1	 16
105	 19	290.8	36.7	 16
106	 19	207.8	32.8	 16
107	 19	230.0	30.9	 16
108	 19	97.5	15.6	 16
109	 19	106.3	12.4	 16
110	 19	122.0	24.1	 16
111	 19	219.3	32.9	 16
112	 19	172.0	24.9	 16
113	 19	695.5	108.6	 16
114	 19	127.0	16.6	 16
115	 19	125.0	16.3	 16
116	 19	126.5	17.7	 16
117	 19	105.0	17.3	 16
118	 19	107.3	14.9	 16
119	 19	608.0	72.0	 16
120	 19	97.8	11.1	 16
121	 19	91.0	15.7	 16
122	 19	107.3	15.2	 16
123	 19	133.8	18.5	 16
124	 19	126.8	19.1	 16
125	 19	144.5	20.6	 16
126	 19	280.3	29.6	 16
127	 19	510.8	47.3	 16
128	 19	250.3	41.0	 16
129	 19	142.3	25.2	 16
130	 19	121.0	16.1	 16
131	 19	486.8	71.1	 16
132	 19	171.8	22.9	 16
133	 19	115.5	23.2	 16
134	 19	147.5	16.3	 16
135	 19	103.0	12.9	 16
136	 19	122.5	17.6	 16
137	 19	301.5	58.5	 16
138	 19	125.8	22.0	 16
139	 19	301.0	31.7	 16
140	 19	141.0	15.4	 16
141	 19	671.5	128.7	 16
142	 19	102.3	16.8	 16
143	 19	133.5	13.0	 16
144	 19	89.0	9.2	 16
145	 19	239.3	50.4	 16
146	 19	113.3	16.8	 16
147	 19	98.5	13.7	 16
148	 19	114.8	18.0	 16
149	 19	168.5	20.0	 20
150	 19	159.5	23.3	 16
151	 19	132.0	21.5	 16
152	 19	119.8	17.4	 16
153	 19	211.3	60.1	 16
154	 19	695.5	59.0	 16
155	 19	160.5	18.0	 16
156	 19	103.8	11.3	 16
157	 19	306.3	33.9	 16
158	 19	330.5	44.1	 16
159	 19	180.0	24.2	 16
160	 19	305.8	33.5	 16
161	 19	118.8	14.6	 16
162	 19	181.3	18.2	 16
163	 19	310.3	23.9	 16
164	 19	202.0	27.5	 16
165	 19	118.3	17.8	 16
166	 19	191.5	22.4	 16
167	 19	117.3	16.0	 16
168	 19	263.8	43.2	 16
169	 19	82.5	11.7	 16
170	 19	360.5	67.8	 16
171	 19	160.3	20.8	 16
172	 19	198.3	22.3	 16
173	 19	453.3	44.0	 16
174	 19	206.3	25.2	 16
175	 19	131.5	22.3	 16
176	 19	207.5	37.0	 16
177	 19	109.3	17.3	 16
178	 19	257.0	27.4	 16
179	 19	178.5	21.6	 16
180	 19	278.0	33.0	 16
181	 19	208.0	15.4	 16
182	 19	123.8	17.5	 16
183	 19	301.3	36.8	 16
184	 19	143.0	23.4	 16
185	 19	157.3	26.8	 16
186	 19	199.0	24.8	 16
187	 19	399.0	35.7	 16
188	 19	100.5	13.1	 16
189	 19	93.5	16.4	 16
190	 19	105.3	9.7	 16
191	 19	210.8	28.7	 16
192	 19	214.3	31.8	 16
193	 19	159.8	27.8	 16
194	 19	170.0	42.0	 16
195	 19	326.3	64.6	 16
196	 19	84.3	15.1	 16
197	 19	111.0	20.4	 16
198	 19	163.3	26.5	 16
199	 19	326.0	28.5	 16
200	 19	306.0	49.5	 16
201	 19	357.3	58.0	 16
202	 19	193.0	18.4	 16
203	 19	185.0	23.0	 16
204	 19	198.3	25.5	 16
205	 19	210.0	36.9	 16
206	 19	125.0	16.2	 16
207	 19	108.8	13.9	 16
208	 19	466.5	41.2	 16
209	 19	95.5	23.1	 16
210	 19	90.5	13.8	 16
211	 19	102.5	22.9	 16
212	 19	87.0	17.9	 16
213	 19	105.8	13.9	 16
214	 19	96.0	10.2	 16
215	 19	1088.8	155.7	 16
216	 19	83.5	11.1	 16
217	 19	514.8	85.8	 16
218	 19	128.5	22.7	 16
219	 19	115.0	18.1	 16
220	 19	115.0	31.8	 16
221	 19	157.0	24.2	 16
222	 19	276.8	40.2	 16
223	 19	70.5	11.4	 16
224	 19	262.3	47.3	 16
225	 19	96.0	12.9	 16
226	 19	86.3	10.7	 16
227	 19	228.3	32.7	 16
228	 19	124.8	17.1	 16
229	 19	1576.5	132.3	 16
230	 19	208.5	26.6	 16
231	 19	317.8	39.1	 16
232	 19	95.8	19.0	 16
233	 19	96.3	14.2	 16
234	 19	78.5	8.2	 16
235	 19	207.5	29.3	 16
236	 19	157.3	22.0	 16
237	 19	103.5	20.0	 16
238	 19	238.5	19.0	 16
239	 19	91.0	14.9	 16
240	 19	133.0	19.9	 16
241	 19	132.8	18.2	 16
242	 19	85.8	15.5	 16
243	 19	131.3	14.8	 16
244	 19	290.0	35.4	 16
245	 19	129.8	18.6	 16
246	 19	165.0	20.8	 16
247	 19	90.3	15.9	 16
248	 19	851.3	150.3	 16
249	 19	96.5	25.2	 16
250	 19	78.3	10.5	 16
251	 19	93.8	16.5	 16
252	 19	90.3	16.3	 16
253	 19	89.0	15.2	 16
254	 19	125.8	14.9	 16
255	 19	104.0	27.1	 16
256	 19	95.5	25.8	 16
257	 19	111.3	14.5	 16
258	 19	99.3	15.6	 16
259	 19	220.8	31.4	 16
260	 19	179.5	25.4	 16
261	 19	397.5	38.0	 16
262	 19	337.3	35.2	 16
263	 19	99.3	18.5	 16
264	 19	171.8	24.2	 16
265	 19	118.3	14.7	 16
266	 19	194.0	27.5	 16
267	 19	156.8	21.9	 16
268	 19	155.0	24.5	 16
269	 19	198.3	28.4	 16
270	 19	196.0	24.5	 16
271	 19	1066.3	261.1	 16
272	 19	365.5	55.5	 16
273	 19	90.8	15.0	 16
274	 19	132.5	38.4	 16
275	 19	148.8	23.7	 16
276	 19	195.3	37.3	 16
277	 19	80.0	11.4	 16
278	 19	141.3	29.2	 16
279	 19	105.0	16.5	 16
280	 19	162.0	18.2	 16
281	 19	90.0	10.3	 16
282	 19	87.5	14.1	 16
283	 19	91.3	13.2	 16
284	 19	93.3	13.0	 16
285	 19	87.3	21.7	 16
286	 19	95.3	14.7	 16
287	 19	127.3	15.2	 16
288	 19	130.0	13.1	 16
289	 19	188.8	33.2	 16
290	 19	368.8	60.9	 16
291	 19	244.3	39.4	 20
292	 19	100.3	16.5	 16
293	 19	155.3	23.8	 16
294	 19	184.8	28.6	 16
295	 19	121.3	21.4	 16
296	 19	103.3	12.3	 16
297	 19	100.8	17.6	 16
298	 19	117.3	15.6	 16
299	 19	113.8	18.5	 16
300	 19	95.3	19.7	 16
301	 19	116.0	12.1	 16
302	 19	178.3	26.7	 16
303	 19	270.3	19.4	 16
304	 19	327.5	41.1	 16
305	 19	129.5	16.0	 16
306	 19	163.5	30.1	 16
307	 19	149.3	22.4	 16
308	 19	152.3	25.1	 16
309	 19	126.5	19.7	 16
310	 19	263.0	36.6	 16
311	 19	93.5	13.4	 16
312	 19	511.0	69.3	 16
313	 19	90.5	10.7	 16
314	 19	131.3	23.3	 16
315	 19	139.5	26.7	 16
316	 19	95.3	16.3	 16
317	 19	316.3	40.3	 16
318	 19	147.0	20.5	 16
319	 19	113.5	14.7	 16
320	 19	202.8	20.4	 16
321	 19	361.0	30.9	 16
322	 19	109.0	13.4	 16
323	 19	156.3	21.8	 16
324	 19	193.3	26.3	 16
325	 19	89.5	13.9	 16
326	 19	415.0	52.8	 16
327	 19	125.3	19.0	 16
328	 19	96.0	15.1	 16
329	 19	79.0	10.0	 16
330	 19	117.8	17.1	 16
331	 19	137.0	21.0	 16
332	 19	90.5	12.5	 16
333	 19	305.3	47.5	 16
334	 19	149.5	29.9	 16
335	 19	386.0	35.4	 16
336	 19	79.5	13.8	 16
337	 19	72.5	14.6	 16
338	 19	199.8	20.6	 16
339	 19	116.3	18.4	 16
340	 19	142.0	22.1	 16
341	 19	85.5	10.8	 16
342	 19	76.8	14.8	 16
343	 19	85.5	15.8	 16
344	 19	89.5	15.6	 16
345	 19	90.5	12.5	 16
346	 19	89.8	17.5	 16
347	 19	84.5	14.1	 16
348	 19	190.3	34.9	 16
349	 19	158.5	22.8	 16
350	 19	95.0	13.7	 16
351	 19	153.3	16.8	 16
352	 19	108.3	14.3	 16
353	 19	213.3	25.3	 16
354	 19	112.8	19.0	 16
355	 19	147.5	12.5	 16
356	 19	178.3	31.1	 16
357	 19	366.5	42.0	 16
358	 19	4967.0	648.6	 16
359	 19	288.5	37.6	 16
360	 19	127.5	21.0	 16
361	 19	425.5	70.9	 16
362	 19	103.0	18.4	 16
363	 19	115.3	19.0	 16
364	 19	166.0	25.4	 16
365	 19	128.5	19.3	 16
366	 19	154.0	18.2	 16
367	 19	100.0	16.5	 16
368	 19	83.3	11.3	 16
369	 19	151.8	27.9	 16
370	 19	73.8	14.5	 16
371	 19	106.0	15.4	 16
372	 19	104.8	16.7	 16
373	 19	386.0	36.0	 16
374	 19	137.8	18.2	 16
375	 19	91.8	10.5	 16
376	 19	131.8	19.9	 16
377	 19	150.0	21.4	 16
378	 19	74.3	9.7	 16
379	 19	88.8	13.7	 16
380	 19	1841.8	173.1	 16
381	 19	223.3	21.3	 16
382	 19	92.0	11.6	 16
383	 19	128.0	13.3	 16
384	 19	551.0	99.3	 16
385	 19	165.3	24.0	 16
386	 19	116.5	12.3	 16
387	 19	335.0	45.5	 16
388	 19	137.3	15.8	 16
389	 19	85.8	10.8	 16
390	 19	98.0	15.9	 16
391	 19	99.8	11.1	 16
392	 19	104.0	17.8	 16
393	 19	222.5	27.3	 16
394	 19	78.8	10.2	 16
395	 19	159.0	24.1	 16
396	 19	134.0	17.8	 16
397	 19	70.3	9.4	 16
398	 19	66.5	9.8	 16
399	 19	199.5	25.0	 16
400	 19	843.5	110.0	 16
401	 19	84.3	15.0	 16
402	 19	209.8	47.1	 16
403	 19	146.3	25.6	 16
404	 19	86.3	14.9	 16
405	 19	84.8	14.2	 16
406	 19	93.0	13.8	 16
407	 19	146.0	20.9	 16
408	 19	954.3	176.3	 16
409	 19	2674.5	573.2	 16
410	 19	92.0	12.6	 16
411	 19	93.0	18.9	 16
412	 19	169.0	22.5	 16
413	 19	96.3	16.7	 16
414	 19	176.0	21.6	 16
415	 19	132.0	22.6	 16
416	 19	188.5	25.2	 16
417	 19	119.0	20.4	 16
418	 19	479.3	117.9	 16
419	 19	76.8	11.5	 16
420	 19	264.3	38.9	 16
421	 19	91.0	16.7	 16
422	 19	138.3	28.7	 16
423	 19	314.3	61.2	 16
424	 19	412.5	42.3	 16
425	 19	397.5	72.7	 16
426	 19	142.5	23.9	 16
427	 19	125.8	21.6	 16
428	 19	300.5	24.3	 16
429	 19	138.8	23.4	 16
430	 19	89.5	18.2	 16
431	 19	201.8	27.1	 16
432	 19	170.0	34.3	 16
433	 19	163.0	28.9	 20
434	 19	1363.8	218.4	 16
435	 19	78.0	13.4	 16
436	 19	218.0	29.7	 16
437	 19	162.5	29.0	 16
438	 19	91.0	16.3	 16
439	 19	77.8	15.2	 16
440	 19	119.0	17.3	 16
441	 19	215.3	32.2	 16
442	 19	114.8	16.0	 16
443	 19	175.0	29.0	 16
444	 19	411.3	49.5	 16
445	 19	225.5	21.3	 16
446	 19	207.3	21.5	 16
447	 19	122.3	14.6	 16
448	 19	130.8	20.9	 16
449	 19	167.0	27.4	 16
450	 19	101.5	16.4	 16
451	 19	138.0	16.1	 16
452	 19	109.5	19.2	 16
453	 19	94.5	18.3	 16
454	 19	108.3	19.0	 16
455	 19	106.3	14.5	 16
456	 19	146.5	21.1	 16
457	 19	88.5	12.5	 16
458	 19	348.8	72.6	 16
459	 19	91.8	11.2	 16
460	 19	82.3	12.1	 16
461	 19	83.0	16.5	 16
462	 19	105.8	13.1	 16
463	 19	129.8	16.7	 16
464	 19	75.3	11.5	 16
465	 19	76.0	9.1	 16
466	 19	76.5	10.1	 16
467	 19	72.8	10.5	 16
468	 19	363.5	22.5	 16
469	 19	130.5	19.6	 16
470	 19	1183.0	67.6	 16
471	 19	281.8	34.8	 16
472	 19	112.3	15.3	 16
473	 19	142.5	22.6	 16
474	 19	68.5	12.0	 16
475	 19	175.5	25.7	 16
476	 19	154.3	41.6	 16
477	 19	86.5	11.7	 16
478	 19	148.0	22.6	 16
479	 19	107.5	15.1	 16
480	 19	148.3	17.7	 16
481	 19	93.8	18.2	 16
482	 19	99.3	18.8	 16
483	 19	77.3	9.0	 16
484	 19	89.8	14.6	 16
485	 19	776.3	99.8	 16
486	 19	525.0	36.0	 16
487	 19	324.8	30.0	 16
488	 19	895.3	79.9	 16
489	 19	154.8	16.1	 16
490	 19	115.5	12.2	 16
491	 19	160.3	23.7	 16
492	 19	130.3	21.8	 16
493	 19	126.5	14.0	 16
494	 19	113.8	19.8	 16
495	 19	101.3	17.3	 16
496	 19	976.0	85.5	 16
497	 19	204.0	35.7	 16
498	 19	648.8	71.1	 16
499	 19	117.5	15.5	 16
500	 19	115.3	15.5	 16
501	 19	114.0	16.2	 16
502	 19	106.3	14.1	 16
503	 19	250.5	41.9	 16
504	 19	116.0	14.2	 16
505	 19	113.5	19.0	 16
506	 19	116.5	17.2	 16
507	 19	383.0	41.8	 16
508	 19	120.0	15.1	 16
509	 19	601.5	101.2	 16
510	 19	132.0	25.2	 16
511	 19	154.5	24.7	 16
512	 19	80.3	9.1	 16
513	 19	68.5	13.1	 16
514	 19	173.5	23.0	 16
515	 19	94.5	13.9	 16
516	 19	110.5	16.8	 16
517	 19	292.5	50.7	 16
518	 19	70.0	12.4	 16
519	 19	76.5	14.0	 16
520	 19	76.3	10.7	 16
521	 19	72.8	12.0	 16
522	 19	76.0	12.7	 16
523	 19	334.5	45.7	 16
524	 19	86.8	16.9	 16
525	 19	111.8	16.1	 16
526	 19	216.8	36.6	 16
527	 19	132.0	24.1	 16
528	 19	160.0	31.5	 16
529	 19	243.0	24.2	 16
530	 19	134.3	17.4	 16
531	 19	375.5	72.1	 16
532	 19	195.3	33.6	 16
533	 19	178.3	21.0	 16
534	 19	93.5	19.9	 16
535	 19	145.0	21.4	 16
536	 19	75.3	16.5	 16
537	 19	104.0	10.0	 16
538	 19	89.5	14.7	 16
539	 19	179.0	28.1	 16
540	 19	236.5	35.6	 16
541	 19	127.3	24.4	 16
542	 19	148.8	20.5	 16
543	 19	172.3	26.5	 16
544	 19	112.8	14.3	 16
545	 19	173.5	27.4	 16
546	 19	129.0	22.6	 16
547	 19	98.0	13.5	 16
548	 19	126.5	23.3	 16
549	 19	174.3	31.0	 16
550	 19	112.0	22.0	 16
551	 19	136.8	19.2	 16
552	 19	87.5	13.0	 16
553	 19	133.3	23.2	 16
554	 19	93.8	10.0	 16
555	 19	77.5	12.2	 16
556	 19	134.8	20.6	 16
557	 19	413.8	118.6	 16
558	 19	92.3	11.6	 16
559	 19	808.3	200.2	 16
560	 19	207.3	34.4	 16
561	 19	89.0	25.2	 16
562	 19	146.0	27.4	 16
563	 19	184.8	26.0	 16
564	 19	88.8	13.4	 16
565	 19	80.3	11.6	 16
566	 19	570.0	171.0	 16
567	 19	111.3	14.3	 16
568	 19	515.5	106.8	 16
569	 19	107.0	21.4	 16
570	 19	78.3	13.8	 16
571	 19	124.8	20.7	 16
572	 19	112.5	26.3	 16
573	 19	91.3	14.0	 16
574	 19	169.3	42.0	 16
575	 19	130.5	18.8	 16
576	 19	115.0	16.8	 20
577	 19	101.5	12.3	 16
578	 19	123.5	16.7	 16
579	 19	393.0	40.2	 16
580	 19	580.3	85.7	 16
581	 19	552.3	54.3	 16
582	 19	158.3	25.6	 16
583	 19	187.5	31.1	 16
584	 19	138.5	17.8	 16
585	 19	120.3	15.9	 16
586	 19	705.0	119.6	 16
587	 19	1719.8	301.1	 16
588	 19	175.3	37.0	 16
589	 19	85.0	14.5	 16
590	 19	196.8	25.4	 16
591	 19	190.8	28.9	 16
592	 19	133.5	19.0	 16
593	 19	218.8	16.7	 16
594	 19	107.8	13.5	 16
595	 19	97.3	13.2	 16
596	 19	206.8	28.5	 16
597	 19	1004.8	168.1	 16
598	 19	80.5	17.0	 16
599	 19	154.5	24.9	 16
600	 19	103.0	16.0	 16
601	 19	110.5	15.7	 16
602	 19	318.5	41.4	 16
603	 19	161.0	21.4	 16
604	 19	109.5	16.9	 16
605	 19	132.0	14.1	 16
606	 19	110.5	21.4	 16
607	 19	295.0	32.5	 16
608	 19	403.5	36.5	 16
609	 19	125.0	20.7	 16
610	 19	100.0	19.9	 16
611	 19	94.8	14.6	 16
612	 19	70.3	12.8	 16
613	 19	97.3	16.7	 16
614	 19	276.3	59.8	 16
615	 19	528.5	88.5	 16
616	 19	418.0	53.1	 16
617	 19	935.8	153.8	 16
618	 19	142.3	22.3	 16
619	 19	98.0	15.9	 16
620	 19	110.3	14.4	 16
621	 19	103.5	17.0	 16
622	 19	248.8	47.9	 16
623	 19	135.8	22.6	 16
624	 19	224.5	31.2	 16
625	 19	174.0	33.8	 16
626	 19	146.5	28.1	 16
627	 19	94.3	19.4	 16
628	 19	110.3	13.3	 16
629	 19	204.5	22.3	 16
630	 19	112.8	17.8	 16
631	 19	123.5	19.0	 16
632	 19	148.5	16.1	 16
633	 19	357.0	38.2	 16
634	 19	428.5	43.5	 16
635	 19	377.5	49.8	 16
636	 19	189.5	16.0	 16
637	 19	90.8	11.7	 16
638	 19	96.5	13.9	 16
639	 19	170.3	24.0	 16
640	 19	280.3	32.0	 16
641	 19	798.5	93.8	 16
642	 19	437.3	40.4	 16
643	 19	445.0	50.3	 16
644	 19	279.0	43.7	 16
645	 19	195.3	24.7	 16
646	 19	141.3	22.0	 16
647	 19	357.8	45.1	 16
648	 19	448.5	90.3	 16
649	 19	175.3	24.9	 16
650	 19	180.5	25.7	 16
651	 19	171.3	23.4	 16
652	 19	115.3	13.7	 16
653	 19	136.5	20.2	 16
654	 19	359.5	39.3	 16
655	 19	157.3	23.1	 16
656	 19	111.3	14.9	 16
657	 19	140.8	23.6	 16
658	 19	99.0	13.5	 16
659	 19	101.5	15.3	 16
660	 19	168.3	17.0	 16
661	 19	122.5	21.3	 16
662	 19	138.3	20.4	 16
663	 19	73.3	13.0	 16
664	 19	81.8	15.6	 16
665	 19	82.3	12.0	 16
666	 19	222.0	23.1	 16
667	 19	104.0	19.0	 16
668	 19	73.0	14.6	 16
669	 19	242.8	44.2	 16
670	 19	109.0	12.6	 16
671	 19	150.0	20.8	 16
672	 19	97.0	18.9	 16
673	 19	84.3	12.9	 16
674	 19	107.5	19.9	 16
675	 19	100.8	18.6	 16
676	 19	367.0	42.9	 16
677	 19	180.0	24.8	 16
678	 19	94.0	19.3	 16
679	 19	73.3	11.1	 16
680	 19	85.3	12.7	 16
681	 19	96.0	13.1	 16
682	 19	85.0	18.8	 16
683	 19	435.5	74.7	 16
684	 19	154.5	21.7	 16
685	 19	138.3	20.8	 16
686	 19	93.5	21.3	 16
687	 19	102.5	18.6	 16
688	 19	122.0	20.1	 16
689	 19	199.3	27.3	 16
690	 19	172.5	21.5	 16
691	 19	105.8	13.8	 16
692	 19	426.0	74.3	 16
693	 19	474.3	87.8	 16
694	 19	224.3	36.9	 16
695	 19	204.3	39.0	 16
696	 19	989.8	292.2	 16
697	 19	91.0	12.3	 16
698	 19	87.5	15.2	 16
699	 19	122.3	22.5	 16
700	 19	108.5	14.4	 16
701	 19	89.5	12.3	 16
702	 19	127.8	27.0	 16
703	 19	115.5	19.7	 16
704	 19	669.8	101.6	 16
705	 19	72.0	8.5	 16
706	 19	93.3	21.2	 16
707	 19	278.8	27.5	 16
708	 19	219.3	35.9	 16
709	 19	229.3	27.0	 16
710	 19	222.3	26.9	 16
711	 19	153.0	22.8	 16
  0	 20	5344.5	1461.5	 16
  1	 20	201.8	45.3	 16
  2	 20	179.0	18.4	 16
  3	 20	227.5	29.6	 16
  4	 20	341.0	31.6	 16
  5	 20	116.5	18.5	 16
  6	 20	134.3	23.8	 16
  7	 20	105.5	16.9	 16
  8	 20	106.8	17.9	 16
  9	 20	105.0	11.5	 16
 10	 20	126.8	17.8	 20
 11	 20	111.5	18.6	 16
 12	 20	132.5	15.2	 16
 13	 20	174.5	21.6	 16
 14	 20	188.0	25.6	 16
 15	 20	182.3	28.3	 16
 16	 20	199.0	22.3	 16
 17	 20	205.0	17.1	 16
 18	 20	340.0	38.3	 16
 19	 20	204.0	27.9	 16
 20	 20	161.3	31.5	 16
 21	 20	193.0	34.3	 16
 22	 20	169.5	27.7	 16
 23	 20	137.0	19.1	 16
 24	 20	158.3	20.3	 16
 25	 20	178.5	21.4	 16
 26	 20	97.0	17.3	 16
 27	 20	149.3	24.3	 16
 28	 20	95.5	13.3	 16
 29	 20	135.0	15.8	 16
 30	 20	111.3	16.0	 16
 31	 20	208.3	31.2	 16
 32	 20	90.5	13.8	 16
 33	 20	125.3	25.2	 16
 34	 20	122.8	19.8	 16
 35	 20	377.0	47.7	 16
 36	 20	103.3	15.2	 16
 37	 20	137.0	16.4	 16
 38	 20	225.8	29.0	 16
 39	 20	215.0	33.2	 16
 40	 20	185.8	17.7	 16
 41	 20	96.0	16.1	 16
 42	 20	123.0	15.8	 16
 43	 20	115.3	18.5	 16
 44	 20	217.8	22.6	 16
 45	 20	158.0	20.1	 16
 46	 20	108.0	16.0	 16
 47	 20	124.3	14.1	 16
 48	 20	382.0	50.4	 16
 49	 20	213.5	24.5	 16
 50	 20	137.5	19.4	 16
 51	 20	166.3	16.8	 16
 52	 20	141.8	22.7	 16
 53	 20	291.3	32.8	 16
 54	 20	152.3	18.6	 16
 55	 20	230.3	25.5	 16
 56	 20	167.3	20.4	 16
 57	 20	183.5	21.3	 16
 58	 20	203.5	23.9	 16
 59	 20	205.3	21.5	 16
 60	 20	384.0	43.0	 16
 61	 20	128.3	20.2	 16
 62	 20	261.0	29.6	 16
 63	 20	266.8	21.4	 16
 64	 20	220.8	24.1	 16
 65	 20	196.3	28.0	 16
 66	 20	150.3	22.4	 16
 67	 20	131.3	18.1	 16
 68	 20	143.3	18.5	 16
 69	 20	184.0	25.0	 16
 70	 20	284.5	23.5	 16
 71	 20	222.0	35.8	 16
 72	 20	171.5	22.9	 16
 73	 20	253.5	32.9	 16
 74	 20	170.3	21.1	 16
 75	 20	139.0	18.9	 16
 76	 20	132.3	20.4	 16
 77	 20	271.3	31.0	 16
 78	 20	196.0	22.5	 16
 79	 20	109.0	16.6	 16
 80	 20	146.3	25.9	 16
 81	 20	107.3	17.3	 16
 82	 20	93.3	12.8	 16
 83	 20	256.5	39.9	 16
 84	 20	170.5	25.8	 16
 85	 20	152.0	23.5	 16
 86	 20	112.0	15.2	 16
 87	 20	313.3	37.4	 16
 88	 20	158.3	21.0	 16
 89	 20	124.3	15.2	 16
 90	 20	192.0	24.7	 16
 91	 20	158.5	21.9	 16
 92	 20	85.3	15.5	 16
 93	 20	117.8	15.5	 16
 94	 20	91.0	12.5	 16
 95	 20	103.5	15.3	 16
 96	 20	299.3	31.3	 16
 97	 20	137.8	22.2	 16
 98	 20	187.0	17.0	 16
 99	 20	148.8	30.2	 16
100	 20	150.5	20.2	 16
101	 20	127.8	15.8	 16
102	 20	743.3	53.3	 16
103	 20	469.3	39.8	 16
104	 20	297.0	29.5	 16
105	 20	161.5	20.5	 16
106	 20	113.5	15.8	 16
107	 20	113.3	12.1	 16
108	 20	86.3	16.7	 16
109	 20	110.0	17.0	 16
110	 20	117.3	16.3	 16
111	 20	115.8	18.9	 16
112	 20	109.3	11.7	 16
113	 20	161.3	27.5	 16
114	 20	101.3	11.3	 16
115	 20	122.0	20.4	 16
116	 20	116.8	22.5	 16
117	 20	92.0	13.8	 16
118	 20	112.3	20.3	 16
119	 20	129.3	17.7	 16
120	 20	95.5	12.7	 16
121	 20	76.3	12.5	 16
122	 20	87.3	17.0	 16
123	 20	108.0	12.2	 16
124	 20	115.3	13.8	 16
125	 20	128.3	18.0	 16
126	 20	704.0	91.4	 16
127	 20	694.8	57.9	 16
128	 20	340.0	53.5	 16
129	 20	127.0	22.8	 16
130	 20	99.0	9.2	 16
131	 20	337.3	32.4	 16
132	 20	169.3	17.2	 16
133	 20	91.3	10.8	 16
134	 20	127.3	24.3	 16
135	 20	100.3	10.4	 16
136	 20	118.5	15.2	 16
137	 20	146.8	20.5	 16
138	 20	199.0	34.0	 16
139	 20	142.5	19.7	 16
140	 20	182.8	21.1	 16
141	 20	192.3	22.5	 16
142	 20	93.5	17.2	 16
143	 20	102.8	20.7	 16
144	 20	83.0	14.6	 16
145	 20	102.3	15.9	 16
146	 20	85.3	14.3	 16
147	 20	87.0	12.5	 16
148	 20	99.0	22.5	 16
149	 20	183.3	19.7	 16
150	 20	152.3	33.6	 16
151	 20	132.8	18.6	 16
152	 20	105.8	16.1	 16
153	 20	129.5	20.3	 20
154	 20	157.5	24.4	 16
155	 20	121.0	15.0	 16
156	 20	136.5	17.9	 16
157	 20	158.8	16.3	 16
158	 20	119.0	16.7	 16
159	 20	172.0	24.3	 16
160	 20	182.3	26.1	 16
161	 20	104.8	18.7	 16
162	 20	263.0	32.8	 16
163	 20	576.8	33.1	 16
164	 20	181.0	23.9	 16
165	 20	107.3	16.3	 16
166	 20	200.8	22.4	 16
167	 20	104.0	14.3	 16
168	 20	249.8	50.6	 16
169	 20	89.0	18.5	 16
170	 20	142.3	16.8	 16
171	 20	510.5	56.9	 16
172	 20	151.3	18.3	 16
173	 20	302.3	26.6	 16
174	 20	173.8	25.3	 16
175	 20	123.5	13.8	 16
176	 20	132.3	20.1	 16
177	 20	113.3	12.8	 16
178	 20	193.5	24.2	 16
179	 20	178.5	17.7	 16
180	 20	177.8	26.2	 16
181	 20	129.5	24.2	 16
182	 20	89.5	14.1	 16
183	 20	153.8	21.3	 16
184	 20	115.8	17.2	 16
185	 20	106.0	17.7	 16
186	 20	116.0	20.1	 16
187	 20	217.8	29.8	 16
188	 20	104.0	15.3	 16
189	 20	83.0	16.2	 16
190	 20	85.5	12.1	 16
191	 20	78.5	10.9	 16
192	 20	114.3	15.9	 16
193	 20	108.5	21.2	 16
194	 20	147.3	18.7	 16
195	 20	135.3	19.6	 16
196	 20	98.5	51.8	 16
197	 20	134.5	17.5	 16
198	 20	175.0	20.1	 16
199	 20	246.5	29.9	 16
200	 20	154.3	15.2	 16
201	 20	323.5	28.3	 16
202	 20	212.3	29.8	 16
203	 20	128.3	17.2	 16
204	 20	110.5	14.1	 16
205	 20	145.3	20.1	 16
206	 20	114.3	17.6	 16
207	 20	97.8	13.8	 16
208	 20	165.8	26.4	 16
209	 20	86.3	12.5	 16
210	 20	82.3	10.0	 16
211	 20	105.8	17.5	 16
212	 20	94.3	14.1	 16
213	 20	91.3	15.3	 16
214	 20	81.5	8.8	 16
215	 20	123.5	25.1	 16
216	 20	101.5	18.0	 16
217	 20	90.0	17.2	 16
218	 20	76.5	11.4	 16
219	 20	111.8	15.2	 16
220	 20	91.3	17.2	 16
221	 20	156.8	17.2	 16
222	 20	116.5	15.3	 16
223	 20	83.5	13.9	 16
224	 20	112.3	17.5	 16
225	 20	68.0	13.2	 16
226	 20	99.5	14.2	 16
227	 20	254.3	39.9	 16
228	 20	114.5	15.7	 16
229	 20	229.5	40.5	 16
230	 20	107.5	14.9	 16
231	 20	108.3	35.7	 16
232	 20	84.3	8.7	 16
233	 20	86.5	15.0	 16
234	 20	71.3	14.5	 16
235	 20	185.0	25.4	 16
236	 20	71.8	10.1	 16
237	 20	105.8	20.1	 16
238	 20	449.8	27.7	 16
239	 20	100.5	17.2	 16
240	 20	91.3	10.7	 16
241	 20	92.3	12.3	 16
242	 20	83.5	13.7	 16
243	 20	115.5	19.2	 16
244	 20	275.0	36.9	 16
245	 20	102.5	19.8	 16
246	 20	147.8	20.2	 16
247	 20	84.8	14.6	 16
248	 20	308.5	42.9	 16
249	 20	101.3	15.1	 16
250	 20	74.8	12.2	 16
251	 20	95.0	15.6	 16
252	 20	96.5	13.1	 16
253	 20	124.3	84.2	 16
254	 20	133.3	18.5	 16
255	 20	77.0	16.0	 16
256	 20	81.8	10.3	 16
257	 20	76.3	9.0	 16
258	 20	86.3	10.8	 16
259	 20	160.5	16.2	 16
260	 20	162.5	26.7	 16
261	 20	356.3	30.5	 16
262	 20	231.3	23.8	 16
263	 20	101.0	11.8	 16
264	 20	105.0	17.1	 16
265	 20	130.5	19.5	 16
266	 20	167.5	27.7	 16
267	 20	153.3	14.7	 16
268	 20	145.3	22.8	 16
269	 20	111.3	11.9	 16
270	 20	139.0	19.9	 16
271	 20	348.0	58.7	 16
272	 20	251.5	24.4	 16
273	 20	72.3	8.1	 16
274	 20	88.3	11.7	 16
275	 20	169.8	30.6	 16
276	 20	170.8	23.5	 16
277	 20	77.8	15.1	 16
278	 20	89.3	18.8	 16
279	 20	108.3	16.2	 16
280	 20	129.5	16.7	 16
281	 20	94.0	14.0	 16
282	 20	87.3	12.1	 16
283	 20	90.3	12.9	 16
284	 20	104.8	127.8	 16
285	 20	73.5	7.9	 16
286	 20	91.0	15.3	 16
287	 20	130.0	20.7	 16
288	 20	129.3	23.0	 16
289	 20	103.0	14.5	 16
290	 20	201.3	34.3	 16
291	 20	126.0	23.5	 16
292	 20	106.3	15.4	 16
293	 20	115.3	12.0	 16
294	 20	131.5	17.1	 16
295	 20	111.3	13.7	 20
296	 20	93.8	16.1	 16
297	 20	92.8	16.6	 16
298	 20	116.5	18.7	 16
299	 20	103.5	12.2	 16
300	 20	83.0	10.0	 16
301	 20	105.3	16.7	 16
302	 20	109.5	17.1	 16
303	 20	233.3	32.7	 16
304	 20	192.5	26.7	 16
305	 20	179.5	25.2	 16
306	 20	129.8	24.0	 16
307	 20	93.0	17.9	 16
308	 20	112.3	16.2	 16
309	 20	99.5	16.7	 16
310	 20	117.0	18.8	 16
311	 20	83.3	12.4	 16
312	 20	155.0	19.2	 16
313	 20	90.8	15.5	 16
314	 20	117.0	17.7	 16
315	 20	101.3	14.7	 16
316	 20	81.8	13.3	 16
317	 20	111.8	13.9	 16
318	 20	109.3	13.9	 16
319	 20	93.0	11.3	 16
320	 20	156.5	20.3	 16
321	 20	450.0	38.0	 16
322	 20	167.8	22.2	 16
323	 20	224.5	24.7	 16
324	 20	179.0	18.0	 16
325	 20	93.5	16.9	 16
326	 20	134.3	17.0	 16
327	 20	111.8	13.0	 16
328	 20	86.5	10.2	 16
329	 20	87.3	9.3	 16
330	 20	111.3	18.2	 16
331	 20	142.8	25.5	 16
332	 20	77.3	11.7	 16
333	 20	112.0	15.0	 16
334	 20	157.8	19.8	 16
335	 20	585.0	55.4	 16
336	 20	80.0	13.7	 16
337	 20	86.0	17.0	 16
338	 20	173.0	24.4	 16
339	 20	133.8	20.6	 16
340	 20	156.3	18.2	 16
341	 20	91.5	29.9	 16
342	 20	73.3	12.7	 16
343	 20	81.5	11.3	 16
344	 20	77.3	10.1	 16
345	 20	73.3	15.4	 16
346	 20	93.3	13.5	 16
347	 20	83.0	14.7	 16
348	 20	254.5	25.5	 16
349	 20	88.3	16.9	 16
350	 20	98.3	15.0	 16
351	 20	88.0	13.8	 16
352	 20	91.8	8.7	 16
353	 20	109.8	13.3	 16
354	 20	117.5	13.8	 16
355	 20	145.0	22.0	 16
356	 20	179.0	26.9	 16
357	 20	223.0	31.3	 16
358	 20	626.0	75.5	 16
359	 20	323.3	35.6	 16
360	 20	104.3	16.2	 16
361	 20	140.5	22.5	 16
362	 20	80.0	17.1	 16
363	 20	93.3	20.2	 16
364	 20	106.3	16.2	 16
365	 20	158.5	23.5	 16
366	 20	787.3	88.9	 16
367	 20	145.5	31.5	 16
368	 20	71.5	10.8	 16
369	 20	172.0	22.1	 16
370	 20	81.0	11.8	 16
371	 20	105.8	18.2	 16
372	 20	89.3	13.8	 16
373	 20	87.3	11.9	 16
374	 20	77.3	13.9	 16
375	 20	87.3	13.6	 16
376	 20	95.8	17.8	 16
377	 20	114.5	17.9	 16
378	 20	65.8	8.2	 16
379	 20	77.5	14.5	 16
380	 20	186.8	30.8	 16
381	 20	106.8	19.7	 16
382	 20	73.3	11.9	 16
383	 20	166.3	32.4	 16
384	 20	110.0	21.2	 16
385	 20	138.5	21.5	 16
386	 20	112.3	12.0	 16
387	 20	175.3	18.0	 16
388	 20	102.3	15.5	 16
389	 20	94.3	12.4	 16
390	 20	83.0	15.3	 16
391	 20	80.8	14.0	 16
392	 20	116.0	12.8	 16
393	 20	83.5	16.9	 16
394	 20	82.0	13.3	 16
395	 20	273.8	19.8	 16
396	 20	94.8	16.3	 16
397	 20	72.0	14.2	 16
398	 20	77.0	14.9	 16
399	 20	197.0	27.2	 16
400	 20	139.8	19.5	 16
401	 20	81.3	12.8	 16
402	 20	83.0	12.6	 16
403	 20	83.5	12.4	 16
404	 20	73.5	12.5	 16
405	 20	91.0	22.3	 16
406	 20	88.0	12.7	 16
407	 20	107.0	18.3	 16
408	 20	306.0	51.9	 16
409	 20	921.5	208.6	 16
410	 20	84.3	19.6	 16
411	 20	107.3	16.9	 16
412	 20	330.8	26.9	 16
413	 20	112.3	22.6	 16
414	 20	215.3	25.9	 16
415	 20	123.3	16.5	 16
416	 20	193.0	29.0	 16
417	 20	118.0	17.5	 16
418	 20	104.3	26.2	 16
419	 20	75.3	11.3	 16
420	 20	270.0	25.4	 16
421	 20	78.3	12.9	 16
422	 20	77.8	12.5	 16
423	 20	252.5	37.4	 16
424	 20	322.3	30.3	 16
425	 20	145.3	20.8	 16
426	 20	140.5	20.5	 16
427	 20	142.5	15.3	 16
428	 20	277.8	28.3	 16
429	 20	130.0	15.8	 16
430	 20	107.5	16.5	 16
431	 20	193.5	24.6	 16
432	 20	153.3	21.5	 16
433	 20	140.3	23.9	 16
434	 20	262.5	49.6	 16
435	 20	79.0	8.6	 16
436	 20	182.5	32.5	 16
437	 20	112.8	15.7	 20
438	 20	97.3	19.3	 16
439	 20	84.0	9.8	 16
440	 20	104.0	15.1	 16
441	 20	121.5	15.3	 16
442	 20	173.3	21.9	 16
443	 20	86.8	11.1	 16
444	 20	264.0	21.9	 16
445	 20	227.3	27.8	 16
446	 20	175.3	17.6	 16
447	 20	117.5	12.8	 16
448	 20	124.3	20.7	 16
449	 20	153.0	17.0	 16
450	 20	100.0	11.1	 16
451	 20	96.8	15.2	 16
452	 20	116.0	18.0	 16
453	 20	88.0	10.9	 16
454	 20	96.3	16.5	 16
455	 20	121.8	14.6	 16
456	 20	116.5	15.0	 16
457	 20	86.5	15.7	 16
458	 20	116.0	14.8	 16
459	 20	89.0	13.9	 16
460	 20	77.0	10.4	 16
461	 20	70.0	10.3	 16
462	 20	91.3	15.6	 16
463	 20	135.8	13.7	 16
464	 20	69.5	12.6	 16
465	 20	77.3	16.4	 16
466	 20	57.0	10.8	 16
467	 20	68.5	11.7	 16
468	 20	137.8	15.6	 16
469	 20	94.0	9.3	 16
470	 20	227.5	28.6	 16
471	 20	349.3	50.2	 16
472	 20	85.5	15.9	 16
473	 20	112.3	22.0	 16
474	 20	69.3	11.3	 16
475	 20	101.3	15.9	 16
476	 20	84.8	10.5	 16
477	 20	81.5	10.8	 16
478	 20	110.5	15.3	 16
479	 20	83.5	12.2	 16
480	 20	211.3	25.7	 16
481	 20	96.5	13.1	 16
482	 20	101.0	17.9	 16
483	 20	69.3	10.7	 16
484	 20	95.0	26.6	 16
485	 20	643.8	59.2	 16
486	 20	533.8	27.9	 16
487	 20	559.0	44.0	 16
488	 20	750.8	61.5	 16
489	 20	215.5	24.6	 16
490	 20	100.5	18.7	 16
491	 20	229.0	26.3	 16
492	 20	126.0	26.8	 16
493	 20	154.3	21.0	 16
494	 20	152.5	21.4	 16
495	 20	95.3	18.5	 16
496	 20	163.8	32.9	 16
497	 20	86.5	11.6	 16
498	 20	180.0	33.3	 16
499	 20	120.5	18.6	 16
500	 20	123.0	14.8	 16
501	 20	111.0	13.9	 16
502	 20	98.5	14.9	 16
503	 20	121.8	21.8	 16
504	 20	145.0	15.5	 16
505	 20	102.5	19.3	 16
506	 20	117.3	18.8	 16
507	 20	284.0	38.8	 16
508	 20	114.3	13.2	 16
509	 20	227.3	40.7	 16
510	 20	95.0	10.0	 16
511	 20	180.3	19.0	 16
512	 20	67.8	12.6	 16
513	 20	79.8	13.6	 16
514	 20	78.5	12.8	 16
515	 20	82.0	14.1	 16
516	 20	120.8	16.7	 16
517	 20	100.5	17.7	 16
518	 20	65.5	9.2	 16
519	 20	75.5	11.3	 16
520	 20	80.5	15.3	 16
521	 20	84.3	11.0	 16
522	 20	73.3	13.1	 16
523	 20	149.5	27.1	 16
524	 20	75.3	11.4	 16
525	 20	87.3	12.9	 16
526	 20	108.8	14.4	 16
527	 20	114.5	16.0	 16
528	 20	169.0	16.6	 16
529	 20	432.5	54.2	 16
530	 20	120.8	15.9	 16
531	 20	237.0	32.5	 16
532	 20	152.3	26.1	 16
533	 20	130.5	18.2	 16
534	 20	84.3	12.7	 16
535	 20	85.8	11.5	 16
536	 20	95.3	13.7	 16
537	 20	135.5	17.4	 16
538	 20	101.5	17.9	 16
539	 20	93.5	9.8	 16
540	 20	133.5	24.7	 16
541	 20	108.0	13.9	 16
542	 20	121.5	15.4	 16
543	 20	110.5	13.7	 16
544	 20	106.5	14.2	 16
545	 20	101.3	12.4	 16
546	 20	118.0	14.9	 16
547	 20	101.5	18.6	 16
548	 20	97.3	21.2	 16
549	 20	119.3	17.0	 16
550	 20	97.3	12.9	 16
551	 20	134.3	19.6	 16
552	 20	92.5	12.9	 16
553	 20	132.3	27.0	 16
554	 20	84.5	11.6	 16
555	 20	81.5	17.2	 16
556	 20	98.8	16.8	 16
557	 20	162.8	26.8	 16
558	 20	99.3	17.7	 16
559	 20	191.3	27.2	 16
560	 20	156.3	22.6	 16
561	 20	99.5	13.7	 16
562	 20	100.5	16.5	 16
563	 20	93.3	15.5	 16
564	 20	95.3	11.9	 16
565	 20	72.0	11.0	 16
566	 20	109.8	21.4	 16
567	 20	85.5	12.6	 16
568	 20	380.3	92.3	 16
569	 20	98.3	16.2	 16
570	 20	72.0	10.7	 16
571	 20	146.8	29.1	 16
572	 20	138.8	70.5	 16
573	 20	94.5	17.6	 16
574	 20	123.3	27.4	 16
575	 20	121.3	15.6	 16
576	 20	179.5	28.0	 16
577	 20	94.3	12.5	 16
578	 20	115.5	22.5	 16
579	 20	269.3	32.1	 16
580	 20	517.5	76.0	 20
581	 20	549.0	56.7	 16
582	 20	130.5	23.8	 16
583	 20	113.8	17.9	 16
584	 20	119.3	22.2	 16
585	 20	105.3	16.8	 16
586	 20	309.8	22.8	 16
587	 20	206.3	24.2	 16
588	 20	82.0	15.3	 16
589	 20	85.0	14.7	 16
590	 20	320.0	30.2	 16
591	 20	119.3	10.0	 16
592	 20	149.5	20.5	 16
593	 20	122.0	16.8	 16
594	 20	104.3	19.2	 16
595	 20	127.3	15.3	 16
596	 20	109.5	22.5	 16
597	 20	205.8	32.7	 16
598	 20	83.8	10.6	 16
599	 20	158.3	19.3	 16
600	 20	188.3	27.2	 16
601	 20	170.8	24.5	 16
602	 20	438.3	35.0	 16
603	 20	181.8	15.4	 16
604	 20	101.3	16.6	 16
605	 20	107.5	13.1	 16
606	 20	155.8	21.4	 16
607	 20	241.8	36.6	 16
608	 20	490.8	39.3	 16
609	 20	161.3	25.4	 16
610	 20	98.5	10.5	 16
611	 20	88.3	15.4	 16
612	 20	80.8	13.4	 16
613	 20	72.5	11.2	 16
614	 20	98.0	14.5	 16
615	 20	230.0	22.8	 16
616	 20	280.8	34.8	 16
617	 20	179.0	29.6	 16
618	 20	147.0	19.7	 16
619	 20	107.5	17.2	 16
620	 20	104.5	14.9	 16
621	 20	92.3	12.5	 16
622	 20	97.5	16.3	 16
623	 20	104.5	17.3	 16
624	 20	108.3	21.0	 16
625	 20	121.0	16.8	 16
626	 20	86.5	18.3	 16
627	 20	84.8	14.4	 16
628	 20	89.0	17.9	 16
629	 20	177.0	27.9	 16
630	 20	118.0	19.7	 16
631	 20	210.3	26.6	 16
632	 20	202.5	23.7	 16
633	 20	125.5	17.6	 16
634	 20	119.5	13.3	 16
635	 20	135.8	18.3	 16
636	 20	307.5	28.2	 16
637	 20	101.0	22.8	 16
638	 20	108.0	23.8	 16
639	 20	177.0	26.9	 16
640	 20	197.0	16.1	 16
641	 20	1269.0	91.8	 16
642	 20	486.5	40.9	 16
643	 20	486.3	43.5	 16
644	 20	473.0	54.6	 16
645	 20	216.0	29.4	 16
646	 20	181.5	26.4	 16
647	 20	273.8	48.2	 16
648	 20	435.0	32.3	 16
649	 20	201.3	22.9	 16
650	 20	193.3	22.8	 16
651	 20	270.5	41.8	 16
652	 20	126.8	10.6	 16
653	 20	97.0	12.8	 16
654	 20	123.0	22.8	 16
655	 20	117.5	14.3	 16
656	 20	97.3	11.9	 16
657	 20	137.8	23.5	 16
658	 20	116.3	15.5	 16
659	 20	106.8	18.4	 16
660	 20	104.5	16.5	 16
661	 20	134.5	33.6	 16
662	 20	90.3	13.1	 16
663	 20	73.3	12.3	 16
664	 20	76.0	10.6	 16
665	 20	90.3	12.4	 16
666	 20	173.5	30.7	 16
667	 20	99.5	16.8	 16
668	 20	82.0	10.8	 16
669	 20	145.5	23.8	 16
670	 20	103.0	16.7	 16
671	 20	262.8	38.6	 16
672	 20	101.3	15.0	 16
673	 20	70.5	11.7	 16
674	 20	76.0	12.5	 16
675	 20	91.0	12.7	 16
676	 20	126.3	17.5	 16
677	 20	104.3	15.0	 16
678	 20	79.0	15.2	 16
679	 20	71.3	10.7	 16
680	 20	81.3	9.9	 16
681	 20	92.8	16.1	 16
682	 20	79.3	12.1	 16
683	 20	98.3	15.7	 16
684	 20	93.0	15.3	 16
685	 20	100.5	14.7	 16
686	 20	102.3	18.1	 16
687	 20	96.8	57.9	 16
688	 20	79.5	14.0	 16
689	 20	193.5	21.8	 16
690	 20	133.8	24.2	 16
691	 20	123.3	18.8	 16
692	 20	561.5	70.8	 16
693	 20	553.0	50.2	 16
694	 20	247.5	32.7	 16
695	 20	179.5	18.3	 16
696	 20	131.3	30.8	 16
697	 20	69.0	14.0	 16
698	 20	72.3	10.0	 16
699	 20	114.3	16.3	 16
700	 20	115.0	18.1	 16
701	 20	95.0	15.0	 16
702	 20	136.0	23.1	 16
703	 20	136.5	19.3	 16
704	 20	343.5	53.5	 16
705	 20	99.3	15.5	 16
706	 20	138.8	13.9	 16
707	 20	270.8	24.4	 16
708	 20	140.0	20.0	 16
709	 20	167.3	26.3	 16
710	 20	164.5	25.0	 16
711	 20	7637.8	1522.9	 16
  0	 21	164.5	25.0	 16
  1	 21	240.3	35.8	 16
  2	 21	324.3	70.5	 16
  3	 21	152.0	25.8	 16
  4	 21	128.8	14.2	 16
  5	 21	132.8	19.0	 16
  6	 21	98.5	13.4	 16
  7	 21	216.5	36.6	 16
  8	 21	202.5	30.1	 16
  9	 21	99.0	16.6	 16
 10	 21	217.0	29.3	 16
 11	 21	125.3	16.2	 16
 12	 21	274.5	29.9	 16
 13	 21	118.0	25.8	 16
 14	 21	236.5	30.7	 20
 15	 21	859.0	88.2	 16
 16	 21	142.3	21.2	 16
 17	 21	135.5	21.0	 16
 18	 21	183.5	19.5	 16
 19	 21	166.8	21.6	 16
 20	 21	153.0	14.2	 16
 21	 21	190.5	22.4	 16
 22	 21	250.8	42.5	 16
 23	 21	110.5	21.2	 16
 24	 21	145.3	20.7	 16
 25	 21	223.5	31.9	 16
 26	 21	97.3	13.4	 16
 27	 21	120.3	19.7	 16
 28	 21	99.5	12.1	 16
 29	 21	100.0	17.4	 16
 30	 21	400.0	39.3	 16
 31	 21	287.8	29.3	 16
 32	 21	103.5	17.3	 16
 33	 21	470.0	93.4	 16
 34	 21	253.0	49.1	 16
 35	 21	97.8	18.1	 16
 36	 21	99.3	13.0	 16
 37	 21	94.0	13.6	 16
 38	 21	190.3	18.1	 16
 39	 21	182.3	23.2	 16
 40	 21	258.3	31.7	 16
 41	 21	252.0	22.0	 16
 42	 21	107.0	17.0	 16
 43	 21	98.5	15.3	 16
 44	 21	101.0	16.2	 16
 45	 21	95.5	11.5	 16
 46	 21	130.0	18.3	 16
 47	 21	137.3	21.7	 16
 48	 21	176.0	24.1	 16
 49	 21	177.5	23.5	 16
 50	 21	106.8	14.4	 16
 51	 21	289.3	37.5	 16
 52	 21	252.8	26.2	 16
 53	 21	119.0	21.3	 16
 54	 21	128.0	15.5	 16
 55	 21	168.3	24.8	 16
 56	 21	334.8	36.4	 16
 57	 21	319.3	26.0	 16
 58	 21	659.5	67.9	 16
 59	 21	251.8	24.5	 16
 60	 21	113.8	16.2	 16
 61	 21	128.3	26.0	 16
 62	 21	127.3	15.2	 16
 63	 21	255.8	42.4	 16
 64	 21	137.8	13.7	 16
 65	 21	139.0	19.0	 16
 66	 21	172.5	21.1	 16
 67	 21	108.3	10.6	 16
 68	 21	150.5	19.0	 16
 69	 21	503.0	46.9	 16
 70	 21	646.0	102.5	 16
 71	 21	99.5	17.3	 16
 72	 21	127.0	17.4	 16
 73	 21	2482.8	418.1	 16
 74	 21	483.0	62.5	 16
 75	 21	226.3	28.5	 16
 76	 21	144.8	26.8	 16
 77	 21	130.0	20.8	 16
 78	 21	152.5	9.6	 16
 79	 21	118.3	22.7	 16
 80	 21	147.8	20.5	 16
 81	 21	150.5	17.6	 16
 82	 21	151.0	17.8	 16
 83	 21	321.8	33.1	 16
 84	 21	762.8	65.2	 16
 85	 21	153.8	17.4	 16
 86	 21	158.0	23.6	 16
 87	 21	190.5	20.9	 16
 88	 21	124.3	15.1	 16
 89	 21	133.0	16.4	 16
 90	 21	107.8	19.8	 16
 91	 21	237.8	19.1	 16
 92	 21	280.5	34.9	 16
 93	 21	281.5	21.1	 16
 94	 21	471.5	39.5	 16
 95	 21	488.8	68.4	 16
 96	 21	146.8	18.2	 16
 97	 21	231.8	36.1	 16
 98	 21	134.3	22.4	 16
 99	 21	95.8	11.6	 16
100	 21	176.5	26.2	 16
101	 21	191.3	25.8	 16
102	 21	123.8	15.4	 16
103	 21	93.0	13.5	 16
104	 21	176.8	22.5	 16
105	 21	141.0	15.9	 16
106	 21	135.0	18.8	 16
107	 21	291.0	46.7	 16
108	 21	96.3	17.7	 16
109	 21	207.3	29.8	 16
110	 21	144.5	22.9	 16
111	 21	135.5	17.0	 16
112	 21	923.8	132.9	 16
113	 21	104.5	15.3	 16
114	 21	91.3	15.2	 16
115	 21	81.0	9.2	 16
116	 21	136.5	21.3	 16
117	 21	104.8	16.0	 16
118	 21	126.3	19.0	 16
119	 21	96.5	9.7	 16
120	 21	159.8	24.7	 16
121	 21	1523.8	185.1	 16
122	 21	917.0	144.4	 16
123	 21	149.0	21.8	 16
124	 21	159.5	19.0	 16
125	 21	199.0	26.4	 16
126	 21	156.3	25.9	 16
127	 21	96.5	18.1	 16
128	 21	101.0	16.6	 16
129	 21	204.3	25.0	 16
130	 21	147.0	23.8	 16
131	 21	101.3	12.3	 16
132	 21	191.3	20.9	 16
133	 21	368.5	33.7	 16
134	 21	185.0	22.4	 16
135	 21	149.3	17.2	 16
136	 21	183.5	24.3	 16
137	 21	264.5	35.1	 16
138	 21	144.0	13.4	 16
139	 21	399.3	62.0	 16
140	 21	156.3	20.3	 16
141	 21	109.5	20.3	 16
142	 21	174.3	17.8	 16
143	 21	103.5	16.4	 16
144	 21	226.3	29.7	 16
145	 21	142.8	25.4	 16
146	 21	114.3	15.5	 16
147	 21	138.5	20.4	 16
148	 21	113.5	22.4	 16
149	 21	162.3	18.1	 16
150	 21	133.3	19.6	 16
151	 21	142.8	25.8	 16
152	 21	666.5	97.5	 16
153	 21	145.3	30.5	 16
154	 21	128.3	14.9	 16
155	 21	140.0	18.6	 16
156	 21	164.3	19.1	 16
157	 21	341.5	44.2	 20
158	 21	119.3	16.8	 16
159	 21	118.8	16.9	 16
160	 21	443.8	53.7	 16
161	 21	106.5	21.9	 16
162	 21	433.8	44.5	 16
163	 21	118.5	21.4	 16
164	 21	155.3	18.6	 16
165	 21	97.5	12.2	 16
166	 21	101.3	13.3	 16
167	 21	208.0	31.2	 16
168	 21	162.8	30.6	 16
169	 21	177.5	30.1	 16
170	 21	116.5	21.4	 16
171	 21	239.3	25.8	 16
172	 21	188.3	36.0	 16
173	 21	182.0	25.4	 16
174	 21	148.3	28.0	 16
175	 21	142.8	23.7	 16
176	 21	149.0	14.5	 16
177	 21	140.8	27.8	 16
178	 21	122.5	13.7	 16
179	 21	203.8	46.8	 16
180	 21	237.0	33.8	 16
181	 21	96.0	22.7	 16
182	 21	130.0	19.0	 16
183	 21	100.3	17.7	 16
184	 21	93.3	16.1	 16
185	 21	79.0	5.8	 16
186	 21	79.3	12.9	 16
187	 21	84.3	11.8	 16
188	 21	81.0	13.8	 16
189	 21	613.8	79.6	 16
190	 21	121.0	18.6	 16
191	 21	282.8	34.9	 16
192	 21	139.3	25.5	 16
193	 21	122.3	18.9	 16
194	 21	130.3	21.7	 16
195	 21	81.5	9.7	 16
196	 21	166.0	26.0	 16
197	 21	102.8	15.4	 16
198	 21	116.0	22.4	 16
199	 21	285.8	23.8	 16
200	 21	122.3	20.0	 16
201	 21	111.0	16.3	 16
202	 21	84.3	11.1	 16
203	 21	115.5	16.9	 16
204	 21	83.5	11.0	 16
205	 21	140.0	24.5	 16
206	 21	149.0	16.8	 16
207	 21	98.0	13.4	 16
208	 21	189.8	32.2	 16
209	 21	106.0	16.1	 16
210	 21	133.3	17.8	 16
211	 21	78.3	9.6	 16
212	 21	110.5	12.5	 16
213	 21	122.3	18.3	 16
214	 21	108.5	12.0	 16
215	 21	205.3	22.0	 16
216	 21	117.0	15.1	 16
217	 21	96.3	16.1	 16
218	 21	139.0	20.8	 16
219	 21	305.5	27.4	 16
220	 21	183.0	29.7	 16
221	 21	207.8	22.6	 16
222	 21	105.0	17.5	 16
223	 21	79.3	17.1	 16
224	 21	123.3	23.0	 16
225	 21	98.0	16.0	 16
226	 21	93.0	18.1	 16
227	 21	794.3	107.4	 16
228	 21	146.3	17.9	 16
229	 21	372.8	43.0	 16
230	 21	469.0	48.6	 16
231	 21	371.0	73.9	 16
232	 21	327.0	66.5	 16
233	 21	106.0	19.7	 16
234	 21	148.3	19.9	 16
235	 21	227.8	29.7	 16
236	 21	72.3	9.3	 16
237	 21	108.0	13.4	 16
238	 21	99.3	11.8	 16
239	 21	137.5	18.2	 16
240	 21	139.8	20.9	 16
241	 21	173.5	17.2	 16
242	 21	82.3	11.2	 16
243	 21	408.5	45.3	 16
244	 21	158.3	22.8	 16
245	 21	235.5	39.1	 16
246	 21	166.0	27.9	 16
247	 21	153.5	29.1	 16
248	 21	230.5	29.4	 16
249	 21	181.5	26.5	 16
250	 21	100.5	13.9	 16
251	 21	73.3	12.9	 16
252	 21	93.8	15.9	 16
253	 21	81.5	11.1	 16
254	 21	97.3	16.0	 16
255	 21	145.0	23.8	 16
256	 21	115.8	10.8	 16
257	 21	173.8	23.8	 16
258	 21	140.0	20.4	 16
259	 21	94.3	15.7	 16
260	 21	106.8	17.5	 16
261	 21	102.3	17.7	 16
262	 21	550.5	72.2	 16
263	 21	2163.5	400.8	 16
264	 21	78.3	13.4	 16
265	 21	116.5	18.0	 16
266	 21	187.3	23.9	 16
267	 21	123.3	20.0	 16
268	 21	145.8	20.9	 16
269	 21	239.5	20.0	 16
270	 21	225.5	31.9	 16
271	 21	82.8	11.8	 16
272	 21	96.3	14.7	 16
273	 21	73.5	10.4	 16
274	 21	118.5	17.5	 16
275	 21	235.5	30.6	 16
276	 21	179.5	23.2	 16
277	 21	89.5	39.6	 16
278	 21	106.3	10.8	 16
279	 21	189.8	41.3	 16
280	 21	112.0	20.0	 16
281	 21	149.0	38.8	 16
282	 21	80.0	14.7	 16
283	 21	153.5	26.0	 16
284	 21	80.0	25.3	 16
285	 21	82.5	14.7	 16
286	 21	94.3	15.5	 16
287	 21	155.0	26.2	 16
288	 21	341.3	46.8	 16
289	 21	152.5	20.7	 16
290	 21	133.0	18.5	 16
291	 21	120.0	18.1	 16
292	 21	85.3	14.3	 16
293	 21	251.5	31.6	 16
294	 21	326.0	55.8	 16
295	 21	96.8	16.4	 16
296	 21	102.3	18.0	 16
297	 21	108.0	16.4	 16
298	 21	86.3	17.1	 16
299	 21	153.3	18.4	 20
300	 21	148.0	15.8	 16
301	 21	171.5	29.2	 16
302	 21	259.5	30.6	 16
303	 21	377.0	37.0	 16
304	 21	371.8	36.1	 16
305	 21	1404.3	213.5	 16
306	 21	141.0	22.7	 16
307	 21	96.3	14.4	 16
308	 21	88.0	18.6	 16
309	 21	149.3	18.5	 16
310	 21	141.5	16.9	 16
311	 21	190.5	30.3	 16
312	 21	112.3	20.0	 16
313	 21	251.3	45.5	 16
314	 21	113.5	15.9	 16
315	 21	88.5	14.4	 16
316	 21	104.0	14.3	 16
317	 21	238.8	41.3	 16
318	 21	602.5	123.4	 16
319	 21	94.3	17.3	 16
320	 21	181.3	29.0	 16
321	 21	531.0	47.5	 16
322	 21	1636.3	197.6	 16
323	 21	433.8	46.6	 16
324	 21	111.0	14.9	 16
325	 21	113.8	20.3	 16
326	 21	173.5	26.8	 16
327	 21	126.5	20.5	 16
328	 21	88.3	14.4	 16
329	 21	180.0	33.5	 16
330	 21	80.0	12.2	 16
331	 21	127.8	20.7	 16
332	 21	263.0	42.3	 16
333	 21	147.5	15.6	 16
334	 21	184.0	17.4	 16
335	 21	234.8	34.3	 16
336	 21	83.3	11.2	 16
337	 21	132.3	21.2	 16
338	 21	154.3	22.5	 16
339	 21	115.5	19.0	 16
340	 21	225.0	27.8	 16
341	 21	526.0	130.5	 16
342	 21	92.8	18.7	 16
343	 21	110.0	20.3	 16
344	 21	152.8	17.2	 16
345	 21	113.0	21.0	 16
346	 21	114.8	23.0	 16
347	 21	124.8	21.3	 16
348	 21	827.3	82.2	 16
349	 21	866.0	137.7	 16
350	 21	141.5	20.7	 16
351	 21	132.5	27.7	 16
352	 21	106.8	11.5	 16
353	 21	175.0	29.7	 16
354	 21	112.0	17.1	 16
355	 21	2465.3	480.6	 16
356	 21	212.8	24.9	 16
357	 21	609.5	65.8	 16
358	 21	268.3	23.6	 16
359	 21	452.3	62.5	 16
360	 21	367.0	26.3	 16
361	 21	485.3	85.0	 16
362	 21	90.3	15.8	 16
363	 21	155.0	29.6	 16
364	 21	73.0	10.8	 16
365	 21	155.0	20.4	 16
366	 21	171.3	22.8	 16
367	 21	377.8	41.2	 16
368	 21	154.5	23.4	 16
369	 21	253.0	27.9	 16
370	 21	193.0	27.7	 16
371	 21	228.5	27.1	 16
372	 21	120.3	21.9	 16
373	 21	85.0	13.0	 16
374	 21	110.8	15.1	 16
375	 21	184.0	26.7	 16
376	 21	91.5	15.8	 16
377	 21	120.5	24.3	 16
378	 21	148.5	18.4	 16
379	 21	96.3	14.2	 16
380	 21	102.0	16.9	 16
381	 21	77.0	15.5	 16
382	 21	88.5	16.7	 16
383	 21	104.0	15.7	 16
384	 21	80.5	12.9	 16
385	 21	100.5	17.4	 16
386	 21	88.0	14.9	 16
387	 21	95.5	20.5	 16
388	 21	98.5	13.5	 16
389	 21	142.3	23.9	 16
390	 21	85.5	18.1	 16
391	 21	78.3	9.6	 16
392	 21	551.3	86.9	 16
393	 21	540.0	64.3	 16
394	 21	78.3	16.6	 16
395	 21	105.3	16.0	 16
396	 21	277.3	53.7	 16
397	 21	3666.5	719.6	 16
398	 21	168.5	33.0	 16
399	 21	149.8	17.2	 16
400	 21	196.5	23.0	 16
401	 21	99.0	14.1	 16
402	 21	84.8	15.5	 16
403	 21	118.3	18.8	 16
404	 21	97.0	11.7	 16
405	 21	73.0	11.3	 16
406	 21	213.5	34.0	 16
407	 21	188.5	29.1	 16
408	 21	141.0	34.6	 16
409	 21	75.5	13.4	 16
410	 21	73.5	15.0	 16
411	 21	87.3	10.9	 16
412	 21	665.5	173.5	 16
413	 21	136.0	22.2	 16
414	 21	384.3	110.0	 16
415	 21	166.3	32.8	 16
416	 21	123.3	17.7	 16
417	 21	129.5	25.3	 16
418	 21	145.5	18.8	 16
419	 21	158.0	24.3	 16
420	 21	91.5	20.9	 16
421	 21	159.5	29.7	 16
422	 21	121.5	16.0	 16
423	 21	142.5	19.7	 16
424	 21	428.3	85.1	 16
425	 21	196.3	28.1	 16
426	 21	195.0	29.5	 16
427	 21	165.3	14.1	 16
428	 21	148.5	16.8	 16
429	 21	157.0	14.6	 16
430	 21	179.0	26.2	 16
431	 21	130.5	14.2	 16
432	 21	252.5	24.2	 16
433	 21	288.5	37.0	 16
434	 21	273.3	29.4	 16
435	 21	288.3	48.3	 16
436	 21	145.5	26.6	 16
437	 21	124.8	24.5	 16
438	 21	199.0	43.0	 16
439	 21	113.5	19.9	 16
440	 21	152.8	20.9	 16
441	 21	225.3	20.6	 20
442	 21	109.5	15.6	 16
443	 21	110.8	21.3	 16
444	 21	138.5	22.3	 16
445	 21	94.5	18.1	 16
446	 21	165.0	19.8	 16
447	 21	168.8	18.2	 16
448	 21	323.3	38.9	 16
449	 21	3146.0	440.6	 16
450	 21	231.3	25.4	 16
451	 21	175.0	40.7	 16
452	 21	151.8	24.6	 16
453	 21	104.8	18.4	 16
454	 21	126.0	18.0	 16
455	 21	159.3	27.4	 16
456	 21	161.3	15.9	 16
457	 21	118.3	11.3	 16
458	 21	169.8	25.0	 16
459	 21	164.3	15.4	 16
460	 21	204.0	42.6	 16
461	 21	173.0	26.5	 16
462	 21	591.0	142.1	 16
463	 21	232.3	18.4	 16
464	 21	91.5	19.0	 16
465	 21	120.5	18.9	 16
466	 21	133.5	18.4	 16
467	 21	202.5	26.5	 16
468	 21	200.5	29.1	 16
469	 21	134.8	14.1	 16
470	 21	132.5	16.6	 16
471	 21	117.3	14.6	 16
472	 21	97.0	13.3	 16
473	 21	168.0	28.1	 16
474	 21	75.3	9.9	 16
475	 21	82.3	13.9	 16
476	 21	309.3	46.8	 16
477	 21	408.3	75.8	 16
478	 21	197.3	19.6	 16
479	 21	120.0	17.9	 16
480	 21	80.0	14.7	 16
481	 21	72.5	10.5	 16
482	 21	94.5	9.6	 16
483	 21	86.8	15.2	 16
484	 21	76.3	12.4	 16
485	 21	91.5	14.5	 16
486	 21	125.3	18.4	 16
487	 21	311.3	18.0	 16
488	 21	118.5	15.3	 16
489	 21	126.3	20.2	 16
490	 21	216.8	23.1	 16
491	 21	225.0	23.3	 16
492	 21	158.3	26.5	 16
493	 21	152.5	19.0	 16
494	 21	184.0	26.1	 16
495	 21	105.0	19.5	 16
496	 21	121.3	10.4	 16
497	 21	81.0	14.9	 16
498	 21	112.3	20.4	 16
499	 21	174.0	22.2	 16
500	 21	157.3	19.6	 16
501	 21	326.8	54.7	 16
502	 21	192.3	24.6	 16
503	 21	133.0	20.0	 16
504	 21	149.3	20.4	 16
505	 21	346.0	72.2	 16
506	 21	79.0	8.6	 16
507	 21	320.8	66.6	 16
508	 21	132.0	17.4	 16
509	 21	91.3	13.0	 16
510	 21	91.0	19.2	 16
511	 21	1536.5	99.6	 16
512	 21	84.5	13.0	 16
513	 21	76.3	14.1	 16
514	 21	94.8	13.0	 16
515	 21	259.8	33.3	 16
516	 21	187.3	24.9	 16
517	 21	93.0	11.4	 16
518	 21	147.8	23.4	 16
519	 21	81.0	14.2	 16
520	 21	136.3	24.3	 16
521	 21	169.0	26.0	 16
522	 21	184.0	25.9	 16
523	 21	109.0	17.1	 16
524	 21	60.0	8.2	 16
525	 21	82.0	11.1	 16
526	 21	71.5	13.5	 16
527	 21	270.3	32.2	 16
528	 21	170.0	21.9	 16
529	 21	263.0	28.7	 16
530	 21	168.5	17.3	 16
531	 21	94.0	12.3	 16
532	 21	337.3	75.7	 16
533	 21	87.3	12.3	 16
534	 21	78.3	14.3	 16
535	 21	229.0	36.3	 16
536	 21	95.5	13.5	 16
537	 21	131.3	12.6	 16
538	 21	83.8	14.1	 16
539	 21	92.3	15.7	 16
540	 21	78.5	14.0	 16
541	 21	94.0	17.0	 16
542	 21	92.8	15.0	 16
543	 21	265.8	35.8	 16
544	 21	141.8	12.9	 16
545	 21	854.3	152.5	 16
546	 21	808.8	78.9	 16
547	 21	156.5	20.7	 16
548	 21	151.5	22.6	 16
549	 21	119.5	20.9	 16
550	 21	144.0	20.4	 16
551	 21	119.3	10.3	 16
552	 21	148.0	16.7	 16
553	 21	96.0	20.2	 16
554	 21	84.5	12.7	 16
555	 21	70.3	12.3	 16
556	 21	86.5	16.8	 16
557	 21	78.3	9.4	 16
558	 21	81.0	17.6	 16
559	 21	84.0	14.9	 16
560	 21	115.8	17.6	 16
561	 21	102.8	15.9	 16
562	 21	206.3	26.5	 16
563	 21	281.5	32.2	 16
564	 21	268.0	27.8	 16
565	 21	92.0	16.4	 16
566	 21	162.0	36.7	 16
567	 21	72.8	10.4	 16
568	 21	232.5	52.7	 16
569	 21	122.0	17.8	 16
570	 21	68.3	10.9	 16
571	 21	102.3	16.9	 16
572	 21	102.8	15.2	 16
573	 21	92.8	14.2	 16
574	 21	126.5	31.3	 16
575	 21	188.0	27.7	 16
576	 21	246.5	40.7	 16
577	 21	211.3	26.3	 16
578	 21	172.3	23.2	 16
579	 21	210.0	30.2	 16
580	 21	190.5	29.6	 16
581	 21	110.3	19.4	 16
582	 21	112.0	16.6	 16
583	 21	2569.8	731.9	 16
584	 21	120.5	29.0	 20
585	 21	288.3	38.1	 16
586	 21	158.3	18.8	 16
587	 21	74.5	12.6	 16
588	 21	70.0	11.9	 16
589	 21	107.3	18.8	 16
590	 21	161.3	23.3	 16
591	 21	396.5	32.5	 16
592	 21	271.3	23.0	 16
593	 21	197.8	27.3	 16
594	 21	136.5	21.8	 16
595	 21	154.3	72.3	 16
596	 21	139.5	23.9	 16
597	 21	128.5	21.6	 16
598	 21	136.5	23.7	 16
599	 21	219.0	26.2	 16
600	 21	140.3	17.6	 16
601	 21	109.3	19.3	 16
602	 21	268.5	46.9	 16
603	 21	181.5	16.0	 16
604	 21	156.0	16.0	 16
605	 21	179.5	19.0	 16
606	 21	125.5	21.2	 16
607	 21	137.8	20.5	 16
608	 21	168.0	21.3	 16
609	 21	383.0	41.7	 16
610	 21	127.8	19.5	 16
611	 21	114.3	22.6	 16
612	 21	217.0	34.6	 16
613	 21	263.0	28.8	 16
614	 21	227.0	23.9	 16
615	 21	187.8	28.5	 16
616	 21	311.0	36.2	 16
617	 21	162.0	21.9	 16
618	 21	106.5	15.2	 16
619	 21	273.5	30.0	 16
620	 21	120.0	25.4	 16
621	 21	119.0	18.2	 16
622	 21	102.0	16.5	 16
623	 21	128.0	23.3	 16
624	 21	126.0	21.5	 16
625	 21	118.5	24.6	 16
626	 21	203.3	21.0	 16
627	 21	90.8	13.2	 16
628	 21	110.3	19.2	 16
629	 21	120.0	17.4	 16
630	 21	151.8	17.7	 16
631	 21	134.3	11.8	 16
632	 21	382.8	51.4	 16
633	 21	135.0	24.5	 16
634	 21	85.3	12.2	 16
635	 21	564.5	62.4	 16
636	 21	141.5	16.4	 16
637	 21	115.3	19.8	 16
638	 21	402.0	58.8	 16
639	 21	80.5	10.1	 16
640	 21	89.0	10.7	 16
641	 21	286.3	30.9	 16
642	 21	155.8	21.6	 16
643	 21	132.3	16.1	 16
644	 21	105.5	10.9	 16
645	 21	89.3	12.9	 16
646	 21	121.0	18.2	 16
647	 21	130.8	29.4	 16
648	 21	244.8	34.2	 16
649	 21	217.3	24.8	 16
650	 21	132.8	21.5	 16
651	 21	130.0	24.2	 16
652	 21	131.0	16.1	 16
653	 21	123.8	24.3	 16
654	 21	143.0	17.9	 16
655	 21	196.8	22.3	 16
656	 21	1448.3	190.5	 16
657	 21	4048.3	506.9	 16
658	 21	173.3	15.4	 16
659	 21	98.3	13.7	 16
660	 21	220.5	32.5	 16
661	 21	115.5	16.7	 16
662	 21	1167.8	158.4	 16
663	 21	117.0	12.6	 16
664	 21	375.3	46.7	 16
665	 21	82.0	13.3	 16
666	 21	93.3	20.8	 16
667	 21	75.8	12.9	 16
668	 21	79.3	17.0	 16
669	 21	78.5	10.5	 16
670	 21	84.5	14.1	 16
671	 21	175.5	25.1	 16
672	 21	135.3	19.7	 16
673	 21	145.0	23.1	 16
674	 21	242.5	63.0	 16
675	 21	234.5	49.7	 16
676	 21	268.3	38.3	 16
677	 21	139.8	23.8	 16
678	 21	73.3	10.3	 16
679	 21	139.5	22.9	 16
680	 21	92.5	14.3	 16
681	 21	161.0	20.1	 16
682	 21	189.5	24.8	 16
683	 21	68.0	13.1	 16
684	 21	80.8	14.1	 16
685	 21	67.0	11.9	 16
686	 21	98.5	16.1	 16
687	 21	149.3	14.2	 16
688	 21	130.3	18.8	 16
689	 21	465.8	55.3	 16
690	 21	494.5	57.8	 16
691	 21	199.5	25.4	 16
692	 21	103.3	11.2	 16
693	 21	329.3	49.6	 16
694	 21	271.8	46.8	 16
695	 21	144.3	19.4	 16
696	 21	192.0	31.4	 16
697	 21	167.5	28.7	 16
698	 21	292.5	61.6	 16
699	 21	90.5	14.9	 16
700	 21	426.5	59.2	 16
701	 21	165.8	18.1	 16
702	 21	93.0	16.1	 16
703	 21	104.0	21.5	 16
704	 21	132.0	15.0	 16
705	 21	179.8	27.9	 16
706	 21	408.0	32.7	 16
707	 21	308.5	30.6	 16
708	 21	180.3	26.3	 16
709	 21	181.3	26.0	 16
710	 21	302.0	27.0	 16
711	 21	158.8	19.7	 16
  0	 22	5486.3	1366.0	 16
  1	 22	255.0	25.8	 16
  2	 22	122.5	23.3	 16
  3	 22	136.8	29.5	 16
  4	 22	138.3	17.7	 16
  5	 22	114.3	16.3	 16
  6	 22	107.0	15.2	 16
  7	 22	175.5	20.9	 16
  8	 22	169.0	13.7	 16
  9	 22	134.8	19.0	 16
 10	 22	216.0	26.2	 16
 11	 22	154.0	20.5	 16
 12	 22	153.0	19.7	 16
 13	 22	116.5	15.8	 16
 14	 22	162.0	14.2	 16
 15	 22	153.8	21.5	 16
 16	 22	116.8	17.1	 16
 17	 22	183.3	24.9	 16
 18	 22	180.3	25.4	 20
 19	 22	136.5	12.7	 16
 20	 22	107.5	16.9	 16
 21	 22	188.5	23.3	 16
 22	 22	191.5	28.6	 16
 23	 22	118.5	12.9	 16
 24	 22	127.8	22.2	 16
 25	 22	113.5	15.4	 16
 26	 22	106.8	16.9	 16
 27	 22	106.3	14.9	 16
 28	 22	98.0	11.2	 16
 29	 22	98.5	12.6	 16
 30	 22	352.5	53.7	 16
 31	 22	209.3	23.3	 16
 32	 22	104.8	18.0	 16
 33	 22	166.8	24.9	 16
 34	 22	131.5	18.7	 16
 35	 22	88.8	9.9	 16
 36	 22	110.8	17.6	 16
 37	 22	88.5	13.9	 16
 38	 22	140.3	26.8	 16
 39	 22	277.5	28.6	 16
 40	 22	157.3	22.5	 16
 41	 22	217.8	34.3	 16
 42	 22	93.0	18.6	 16
 43	 22	94.3	11.0	 16
 44	 22	98.5	11.4	 16
 45	 22	88.0	11.8	 16
 46	 22	114.0	12.5	 16
 47	 22	104.5	15.1	 16
 48	 22	121.5	13.6	 16
 49	 22	104.3	12.5	 16
 50	 22	87.3	13.4	 16
 51	 22	141.8	18.5	 16
 52	 22	134.0	27.8	 16
 53	 22	99.3	17.6	 16
 54	 22	113.0	19.2	 16
 55	 22	111.0	18.4	 16
 56	 22	166.3	29.3	 16
 57	 22	291.3	39.1	 16
 58	 22	160.8	29.3	 16
 59	 22	145.5	16.3	 16
 60	 22	104.3	18.2	 16
 61	 22	96.3	19.6	 16
 62	 22	101.5	16.0	 16
 63	 22	167.0	27.4	 16
 64	 22	154.3	23.0	 16
 65	 22	137.3	18.8	 16
 66	 22	168.3	28.5	 16
 67	 22	97.8	11.4	 16
 68	 22	234.8	27.4	 16
 69	 22	532.3	60.9	 16
 70	 22	554.8	74.5	 16
 71	 22	88.3	14.5	 16
 72	 22	111.0	15.0	 16
 73	 22	623.0	97.4	 16
 74	 22	158.8	11.5	 16
 75	 22	132.3	17.3	 16
 76	 22	119.8	18.1	 16
 77	 22	127.3	18.9	 16
 78	 22	185.0	20.9	 16
 79	 22	105.3	13.6	 16
 80	 22	145.5	18.9	 16
 81	 22	234.3	21.8	 16
 82	 22	193.3	16.5	 16
 83	 22	154.8	18.0	 16
 84	 22	273.5	36.8	 16
 85	 22	153.3	21.5	 16
 86	 22	121.3	13.1	 16
 87	 22	184.5	25.6	 16
 88	 22	106.5	13.1	 16
 89	 22	153.5	16.5	 16
 90	 22	103.0	17.7	 16
 91	 22	293.5	19.3	 16
 92	 22	424.0	38.0	 16
 93	 22	135.8	22.3	 16
 94	 22	262.5	35.5	 16
 95	 22	283.5	42.0	 16
 96	 22	140.8	24.3	 16
 97	 22	211.3	21.8	 16
 98	 22	111.5	19.2	 16
 99	 22	85.0	13.1	 16
100	 22	135.3	21.7	 16
101	 22	114.8	19.4	 16
102	 22	115.3	13.8	 16
103	 22	97.3	17.6	 16
104	 22	157.3	20.1	 16
105	 22	313.3	37.0	 16
106	 22	253.8	28.1	 16
107	 22	95.3	14.1	 16
108	 22	100.3	12.8	 16
109	 22	235.0	27.4	 16
110	 22	120.5	24.0	 16
111	 22	117.3	12.0	 16
112	 22	147.3	17.5	 16
113	 22	102.5	16.1	 16
114	 22	87.3	13.9	 16
115	 22	84.3	13.6	 16
116	 22	101.3	13.0	 16
117	 22	99.8	12.2	 16
118	 22	92.8	17.4	 16
119	 22	106.0	17.4	 16
120	 22	176.8	21.7	 16
121	 22	296.3	41.2	 16
122	 22	109.8	14.8	 16
123	 22	144.5	16.2	 16
124	 22	114.3	17.8	 16
125	 22	125.5	19.9	 16
126	 22	159.3	23.2	 16
127	 22	105.0	25.3	 16
128	 22	102.5	18.3	 16
129	 22	318.0	33.9	 16
130	 22	134.8	19.0	 16
131	 22	98.0	16.6	 16
132	 22	150.0	30.0	 16
133	 22	280.8	32.4	 16
134	 22	136.0	18.3	 16
135	 22	133.0	27.6	 16
136	 22	130.3	16.7	 16
137	 22	166.0	23.5	 16
138	 22	127.3	17.5	 16
139	 22	170.3	23.0	 16
140	 22	110.3	24.9	 16
141	 22	96.0	15.9	 16
142	 22	96.0	17.4	 16
143	 22	108.0	11.7	 16
144	 22	197.3	31.7	 16
145	 22	159.0	28.4	 16
146	 22	100.5	15.7	 16
147	 22	102.5	15.1	 16
148	 22	83.8	15.4	 16
149	 22	105.8	21.0	 16
150	 22	128.0	21.6	 16
151	 22	115.5	17.8	 16
152	 22	557.0	63.9	 16
153	 22	148.0	32.0	 16
154	 22	114.8	18.1	 16
155	 22	123.3	20.2	 16
156	 22	148.5	24.1	 16
157	 22	120.0	17.6	 16
158	 22	118.5	17.9	 16
159	 22	113.5	15.6	 16
160	 22	205.0	29.2	 16
161	 22	107.8	15.3	 20
162	 22	200.5	29.1	 16
163	 22	100.5	17.7	 16
164	 22	92.5	12.5	 16
165	 22	108.3	15.3	 16
166	 22	88.3	11.2	 16
167	 22	197.3	14.8	 16
168	 22	171.3	24.1	 16
169	 22	108.5	15.1	 16
170	 22	101.0	16.4	 16
171	 22	185.5	29.6	 16
172	 22	112.8	15.8	 16
173	 22	223.5	38.1	 16
174	 22	151.3	17.0	 16
175	 22	93.3	17.2	 16
176	 22	181.8	25.0	 16
177	 22	139.3	20.9	 16
178	 22	128.8	22.2	 16
179	 22	77.0	13.7	 16
180	 22	142.3	17.9	 16
181	 22	102.3	17.9	 16
182	 22	96.0	18.1	 16
183	 22	83.0	14.6	 16
184	 22	73.5	11.9	 16
185	 22	80.3	12.1	 16
186	 22	82.0	13.1	 16
187	 22	96.3	15.5	 16
188	 22	91.8	12.7	 16
189	 22	193.0	34.1	 16
190	 22	95.8	12.8	 16
191	 22	131.0	21.6	 16
192	 22	126.0	17.3	 16
193	 22	107.5	20.6	 16
194	 22	88.3	13.2	 16
195	 22	88.3	11.6	 16
196	 22	126.0	18.7	 16
197	 22	95.0	14.0	 16
198	 22	98.3	17.6	 16
199	 22	286.3	26.4	 16
200	 22	98.3	14.1	 16
201	 22	96.3	18.4	 16
202	 22	78.3	12.3	 16
203	 22	103.8	18.8	 16
204	 22	75.5	9.4	 16
205	 22	106.3	9.5	 16
206	 22	135.0	18.2	 16
207	 22	119.0	17.3	 16
208	 22	169.3	22.8	 16
209	 22	122.0	16.6	 16
210	 22	205.5	22.4	 16
211	 22	83.3	17.0	 16
212	 22	92.0	13.0	 16
213	 22	103.5	14.1	 16
214	 22	97.0	13.9	 16
215	 22	116.8	11.7	 16
216	 22	285.8	29.6	 16
217	 22	80.5	14.2	 16
218	 22	107.3	20.2	 16
219	 22	247.8	45.3	 16
220	 22	140.3	17.3	 16
221	 22	155.0	17.7	 16
222	 22	90.8	12.4	 16
223	 22	80.8	9.1	 16
224	 22	97.3	12.8	 16
225	 22	103.3	17.6	 16
226	 22	95.0	14.6	 16
227	 22	220.8	25.4	 16
228	 22	151.8	18.6	 16
229	 22	328.5	33.0	 16
230	 22	164.0	16.2	 16
231	 22	88.5	17.9	 16
232	 22	106.3	14.5	 16
233	 22	98.0	13.9	 16
234	 22	224.3	27.4	 16
235	 22	190.0	17.5	 16
236	 22	75.8	11.2	 16
237	 22	112.3	65.7	 16
238	 22	89.0	14.6	 16
239	 22	117.5	18.5	 16
240	 22	125.3	15.8	 16
241	 22	169.3	17.9	 16
242	 22	92.5	11.7	 16
243	 22	250.0	35.9	 16
244	 22	174.5	24.2	 16
245	 22	180.3	16.3	 16
246	 22	174.3	18.3	 16
247	 22	115.5	16.0	 16
248	 22	341.8	53.6	 16
249	 22	142.3	14.4	 16
250	 22	102.5	14.5	 16
251	 22	91.3	13.8	 16
252	 22	82.3	17.2	 16
253	 22	84.0	13.6	 16
254	 22	104.5	17.3	 16
255	 22	139.5	17.2	 16
256	 22	132.8	24.0	 16
257	 22	111.3	15.4	 16
258	 22	102.3	14.6	 16
259	 22	86.3	11.2	 16
260	 22	101.8	9.1	 16
261	 22	111.8	13.3	 16
262	 22	333.0	27.9	 16
263	 22	460.8	85.9	 16
264	 22	80.8	12.5	 16
265	 22	90.3	13.4	 16
266	 22	176.8	31.0	 16
267	 22	167.5	21.6	 16
268	 22	208.0	28.5	 16
269	 22	186.3	25.3	 16
270	 22	99.8	16.5	 16
271	 22	84.3	7.8	 16
272	 22	86.8	13.0	 16
273	 22	79.0	10.1	 16
274	 22	140.8	19.6	 16
275	 22	129.8	20.3	 16
276	 22	100.3	21.6	 16
277	 22	89.3	29.5	 16
278	 22	89.8	15.9	 16
279	 22	94.0	19.2	 16
280	 22	106.0	17.1	 16
281	 22	97.0	23.6	 16
282	 22	75.8	12.9	 16
283	 22	74.5	8.3	 16
284	 22	80.5	15.1	 16
285	 22	81.8	17.2	 16
286	 22	83.0	13.0	 16
287	 22	137.3	19.8	 16
288	 22	202.3	24.2	 16
289	 22	152.0	17.7	 16
290	 22	131.5	16.7	 16
291	 22	106.3	15.5	 16
292	 22	104.0	13.0	 16
293	 22	194.3	42.6	 16
294	 22	244.5	36.8	 16
295	 22	86.0	13.1	 16
296	 22	107.3	16.1	 16
297	 22	104.5	16.2	 16
298	 22	97.0	19.8	 16
299	 22	115.0	19.8	 16
300	 22	102.0	15.6	 16
301	 22	119.3	17.3	 16
302	 22	522.3	71.6	 16
303	 22	241.5	36.7	 20
304	 22	316.3	28.4	 16
305	 22	332.0	50.3	 16
306	 22	116.3	15.9	 16
307	 22	105.8	11.1	 16
308	 22	90.5	13.6	 16
309	 22	137.5	14.7	 16
310	 22	133.3	21.3	 16
311	 22	116.0	20.7	 16
312	 22	107.3	14.6	 16
313	 22	171.3	17.2	 16
314	 22	98.5	13.3	 16
315	 22	99.3	20.3	 16
316	 22	114.8	19.7	 16
317	 22	605.5	74.1	 16
318	 22	244.3	34.0	 16
319	 22	112.8	13.4	 16
320	 22	131.5	17.3	 16
321	 22	134.8	15.8	 16
322	 22	212.8	37.7	 16
323	 22	114.8	24.2	 16
324	 22	93.8	14.6	 16
325	 22	107.8	14.1	 16
326	 22	81.3	13.7	 16
327	 22	92.5	13.6	 16
328	 22	100.0	18.3	 16
329	 22	84.5	13.5	 16
330	 22	78.3	13.0	 16
331	 22	107.3	15.7	 16
332	 22	141.8	19.5	 16
333	 22	104.8	15.3	 16
334	 22	142.8	25.4	 16
335	 22	493.8	61.9	 16
336	 22	84.5	10.3	 16
337	 22	138.0	26.4	 16
338	 22	280.8	41.1	 16
339	 22	118.0	14.5	 16
340	 22	242.5	24.2	 16
341	 22	180.0	24.1	 16
342	 22	166.0	19.7	 16
343	 22	116.0	19.3	 16
344	 22	125.5	21.8	 16
345	 22	109.3	46.2	 16
346	 22	111.0	15.0	 16
347	 22	139.0	16.3	 16
348	 22	235.8	36.2	 16
349	 22	229.3	27.5	 16
350	 22	100.0	11.9	 16
351	 22	131.3	24.5	 16
352	 22	96.0	14.5	 16
353	 22	116.5	16.1	 16
354	 22	119.3	21.0	 16
355	 22	532.5	80.7	 16
356	 22	187.0	33.5	 16
357	 22	932.3	71.3	 16
358	 22	263.8	25.9	 16
359	 22	260.3	30.5	 16
360	 22	277.5	41.4	 16
361	 22	180.3	31.4	 16
362	 22	103.3	20.2	 16
363	 22	89.5	11.5	 16
364	 22	88.8	16.4	 16
365	 22	121.3	14.7	 16
366	 22	116.0	19.0	 16
367	 22	170.3	17.8	 16
368	 22	187.0	31.3	 16
369	 22	108.3	17.1	 16
370	 22	128.3	16.6	 16
371	 22	160.3	26.3	 16
372	 22	98.8	16.1	 16
373	 22	84.3	12.7	 16
374	 22	111.5	18.0	 16
375	 22	115.3	18.8	 16
376	 22	99.5	14.9	 16
377	 22	147.3	12.2	 16
378	 22	155.8	21.2	 16
379	 22	91.8	16.6	 16
380	 22	96.5	13.3	 16
381	 22	97.3	14.3	 16
382	 22	80.3	14.2	 16
383	 22	89.5	14.5	 16
384	 22	80.3	11.8	 16
385	 22	76.5	12.4	 16
386	 22	79.8	20.0	 16
387	 22	82.5	14.7	 16
388	 22	121.3	19.5	 16
389	 22	129.0	18.0	 16
390	 22	90.0	19.1	 16
391	 22	72.3	11.7	 16
392	 22	103.8	15.2	 16
393	 22	104.3	20.2	 16
394	 22	69.0	9.2	 16
395	 22	99.3	9.1	 16
396	 22	109.3	15.0	 16
397	 22	122.3	15.3	 16
398	 22	104.3	18.4	 16
399	 22	112.0	17.2	 16
400	 22	117.0	17.7	 16
401	 22	79.8	12.5	 16
402	 22	70.8	16.4	 16
403	 22	93.0	13.3	 16
404	 22	136.5	19.8	 16
405	 22	81.8	17.1	 16
406	 22	144.3	22.6	 16
407	 22	157.0	14.1	 16
408	 22	145.0	25.6	 16
409	 22	83.8	12.9	 16
410	 22	73.0	14.3	 16
411	 22	93.0	10.3	 16
412	 22	223.3	45.0	 16
413	 22	116.5	17.2	 16
414	 22	93.3	18.9	 16
415	 22	94.3	13.0	 16
416	 22	82.8	12.5	 16
417	 22	139.8	17.4	 16
418	 22	136.5	21.1	 16
419	 22	142.5	15.8	 16
420	 22	98.0	13.5	 16
421	 22	194.3	28.3	 16
422	 22	96.5	19.4	 16
423	 22	128.8	21.8	 16
424	 22	278.5	38.9	 16
425	 22	141.3	17.2	 16
426	 22	178.3	20.8	 16
427	 22	155.8	21.5	 16
428	 22	375.5	44.4	 16
429	 22	202.8	29.4	 16
430	 22	153.5	22.4	 16
431	 22	105.5	12.1	 16
432	 22	220.3	31.1	 16
433	 22	382.5	32.2	 16
434	 22	428.0	41.7	 16
435	 22	397.0	40.0	 16
436	 22	116.8	31.8	 16
437	 22	103.3	19.8	 16
438	 22	87.3	12.6	 16
439	 22	116.3	18.7	 16
440	 22	173.3	29.3	 16
441	 22	240.3	26.4	 16
442	 22	126.8	16.5	 16
443	 22	85.0	13.1	 16
444	 22	123.8	16.8	 16
445	 22	98.3	17.0	 20
446	 22	87.5	10.6	 16
447	 22	149.5	23.0	 16
448	 22	333.8	28.9	 16
449	 22	921.3	101.0	 16
450	 22	158.0	22.6	 16
451	 22	197.5	28.8	 16
452	 22	124.8	18.8	 16
453	 22	94.5	12.0	 16
454	 22	124.0	19.4	 16
455	 22	129.0	15.4	 16
456	 22	164.3	15.0	 16
457	 22	159.3	14.8	 16
458	 22	158.5	19.8	 16
459	 22	142.3	22.4	 16
460	 22	142.8	16.2	 16
461	 22	353.8	37.1	 16
462	 22	259.3	33.3	 16
463	 22	127.8	21.8	 16
464	 22	74.3	12.8	 16
465	 22	86.3	11.4	 16
466	 22	98.8	15.4	 16
467	 22	95.5	15.0	 16
468	 22	200.5	31.8	 16
469	 22	111.3	16.3	 16
470	 22	150.5	22.1	 16
471	 22	112.3	20.7	 16
472	 22	121.5	19.3	 16
473	 22	85.3	12.4	 16
474	 22	69.5	10.6	 16
475	 22	75.0	12.9	 16
476	 22	185.0	32.5	 16
477	 22	231.8	27.2	 16
478	 22	96.0	13.9	 16
479	 22	135.5	23.7	 16
480	 22	80.8	14.4	 16
481	 22	78.3	10.3	 16
482	 22	82.3	15.7	 16
483	 22	77.3	11.7	 16
484	 22	70.3	12.4	 16
485	 22	81.5	10.9	 16
486	 22	194.5	20.5	 16
487	 22	308.5	36.2	 16
488	 22	107.3	18.0	 16
489	 22	102.0	18.1	 16
490	 22	226.0	20.2	 16
491	 22	252.8	37.6	 16
492	 22	142.0	19.0	 16
493	 22	151.8	18.7	 16
494	 22	219.3	25.9	 16
495	 22	105.0	14.7	 16
496	 22	170.5	22.6	 16
497	 22	83.8	20.5	 16
498	 22	99.5	28.8	 16
499	 22	133.3	14.0	 16
500	 22	140.0	15.5	 16
501	 22	142.8	19.4	 16
502	 22	201.3	28.5	 16
503	 22	134.3	25.4	 16
504	 22	169.8	21.6	 16
505	 22	234.5	27.0	 16
506	 22	120.0	20.4	 16
507	 22	131.5	23.0	 16
508	 22	96.3	12.6	 16
509	 22	87.8	14.5	 16
510	 22	84.3	9.6	 16
511	 22	208.0	33.1	 16
512	 22	85.0	9.6	 16
513	 22	82.3	10.9	 16
514	 22	76.3	10.4	 16
515	 22	127.3	13.8	 16
516	 22	97.8	12.5	 16
517	 22	85.8	12.1	 16
518	 22	89.8	16.5	 16
519	 22	76.0	10.6	 16
520	 22	91.8	12.0	 16
521	 22	75.0	10.5	 16
522	 22	74.0	9.6	 16
523	 22	107.5	21.0	 16
524	 22	70.8	11.1	 16
525	 22	76.5	12.6	 16
526	 22	71.0	10.1	 16
527	 22	188.5	26.9	 16
528	 22	117.3	19.6	 16
529	 22	181.0	12.9	 16
530	 22	151.5	24.9	 16
531	 22	96.8	13.5	 16
532	 22	121.3	12.4	 16
533	 22	90.0	20.4	 16
534	 22	81.0	12.8	 16
535	 22	117.0	23.7	 16
536	 22	83.5	13.9	 16
537	 22	151.3	23.1	 16
538	 22	82.3	12.5	 16
539	 22	82.5	15.5	 16
540	 22	76.3	10.0	 16
541	 22	81.3	10.3	 16
542	 22	96.0	22.4	 16
543	 22	226.8	25.8	 16
544	 22	199.8	23.3	 16
545	 22	393.0	25.5	 16
546	 22	439.0	36.2	 16
547	 22	121.3	13.0	 16
548	 22	137.5	18.5	 16
549	 22	150.5	29.7	 16
550	 22	139.8	20.8	 16
551	 22	101.0	9.9	 16
552	 22	222.3	29.9	 16
553	 22	112.5	14.4	 16
554	 22	84.5	14.9	 16
555	 22	63.3	8.6	 16
556	 22	71.0	9.3	 16
557	 22	75.3	11.9	 16
558	 22	85.8	13.4	 16
559	 22	90.0	16.1	 16
560	 22	116.3	19.4	 16
561	 22	88.3	16.5	 16
562	 22	177.5	21.7	 16
563	 22	212.3	24.7	 16
564	 22	208.3	29.1	 16
565	 22	73.0	15.2	 16
566	 22	80.5	13.0	 16
567	 22	71.3	12.8	 16
568	 22	91.5	13.8	 16
569	 22	82.8	17.6	 16
570	 22	82.5	13.2	 16
571	 22	77.0	10.9	 16
572	 22	103.3	14.3	 16
573	 22	110.3	18.9	 16
574	 22	95.5	16.8	 16
575	 22	180.8	26.0	 16
576	 22	264.0	27.4	 16
577	 22	188.5	21.1	 16
578	 22	132.5	20.6	 16
579	 22	167.0	23.2	 16
580	 22	179.3	15.1	 16
581	 22	119.3	14.1	 16
582	 22	109.3	15.7	 16
583	 22	501.5	110.5	 16
584	 22	111.3	17.1	 16
585	 22	163.3	33.1	 16
586	 22	112.0	15.8	 16
587	 22	77.8	16.9	 16
588	 22	67.5	14.9	 20
589	 22	114.0	13.1	 16
590	 22	151.3	16.8	 16
591	 22	192.8	20.9	 16
592	 22	391.5	49.0	 16
593	 22	148.3	21.6	 16
594	 22	118.0	18.0	 16
595	 22	105.8	20.1	 16
596	 22	98.5	10.3	 16
597	 22	111.8	19.0	 16
598	 22	121.0	18.0	 16
599	 22	140.8	19.1	 16
600	 22	142.3	15.4	 16
601	 22	106.5	7.6	 16
602	 22	148.5	17.7	 16
603	 22	147.3	18.6	 16
604	 22	139.0	20.5	 16
605	 22	183.0	27.4	 16
606	 22	104.3	16.2	 16
607	 22	285.5	29.7	 16
608	 22	122.5	15.3	 16
609	 22	132.8	20.2	 16
610	 22	107.0	19.1	 16
611	 22	111.8	17.7	 16
612	 22	176.3	18.8	 16
613	 22	170.0	26.2	 16
614	 22	240.8	31.8	 16
615	 22	284.5	28.6	 16
616	 22	418.0	36.4	 16
617	 22	131.5	24.2	 16
618	 22	110.0	15.2	 16
619	 22	132.3	18.7	 16
620	 22	88.8	13.7	 16
621	 22	124.8	16.5	 16
622	 22	93.0	10.9	 16
623	 22	122.3	18.0	 16
624	 22	95.3	11.0	 16
625	 22	105.8	14.5	 16
626	 22	101.5	13.1	 16
627	 22	91.0	10.9	 16
628	 22	86.0	14.4	 16
629	 22	123.3	21.4	 16
630	 22	229.0	29.2	 16
631	 22	372.3	42.6	 16
632	 22	262.3	30.8	 16
633	 22	118.0	17.5	 16
634	 22	79.5	15.0	 16
635	 22	131.3	16.7	 16
636	 22	122.8	18.4	 16
637	 22	112.5	19.2	 16
638	 22	123.5	18.9	 16
639	 22	99.3	17.2	 16
640	 22	96.3	16.6	 16
641	 22	188.3	20.7	 16
642	 22	162.8	19.5	 16
643	 22	123.5	16.0	 16
644	 22	119.5	16.6	 16
645	 22	84.5	17.8	 16
646	 22	85.0	11.8	 16
647	 22	133.5	9.3	 16
648	 22	172.5	18.2	 16
649	 22	161.0	18.3	 16
650	 22	145.3	20.7	 16
651	 22	149.5	20.1	 16
652	 22	149.0	29.2	 16
653	 22	109.8	19.5	 16
654	 22	134.5	16.0	 16
655	 22	182.5	23.3	 16
656	 22	374.5	50.6	 16
657	 22	530.8	89.9	 16
658	 22	138.5	16.6	 16
659	 22	82.3	9.7	 16
660	 22	138.3	20.0	 16
661	 22	102.8	11.4	 16
662	 22	401.3	60.4	 16
663	 22	111.5	13.5	 16
664	 22	266.5	28.7	 16
665	 22	82.5	15.5	 16
666	 22	74.5	11.7	 16
667	 22	74.0	13.9	 16
668	 22	76.5	13.7	 16
669	 22	85.0	16.6	 16
670	 22	80.3	11.6	 16
671	 22	137.0	23.8	 16
672	 22	136.3	21.6	 16
673	 22	109.5	13.1	 16
674	 22	211.8	30.5	 16
675	 22	134.3	22.3	 16
676	 22	115.8	14.8	 16
677	 22	141.3	19.7	 16
678	 22	75.5	11.2	 16
679	 22	82.8	14.8	 16
680	 22	68.5	13.4	 16
681	 22	165.8	25.5	 16
682	 22	158.3	15.8	 16
683	 22	83.0	11.4	 16
684	 22	78.5	11.1	 16
685	 22	73.3	10.7	 16
686	 22	99.5	18.5	 16
687	 22	133.8	26.4	 16
688	 22	91.8	16.0	 16
689	 22	197.8	30.9	 16
690	 22	357.3	30.0	 16
691	 22	175.8	25.7	 16
692	 22	116.0	19.3	 16
693	 22	261.0	31.3	 16
694	 22	258.5	50.9	 16
695	 22	146.3	15.0	 16
696	 22	198.5	28.0	 16
697	 22	132.0	21.0	 16
698	 22	108.0	18.3	 16
699	 22	98.0	18.3	 16
700	 22	197.8	35.6	 16
701	 22	153.0	24.9	 16
702	 22	105.5	13.1	 16
703	 22	91.0	11.9	 16
704	 22	127.3	15.5	 16
705	 22	340.0	30.5	 16
706	 22	218.8	26.7	 16
707	 22	163.0	21.3	 16
708	 22	325.3	28.8	 16
709	 22	384.5	32.8	 16
710	 22	179.8	34.6	 16
711	 22	7687.0	1273.2	 16
  0	 23	150.0	29.9	 16
  1	 23	202.3	27.0	 16
  2	 23	161.3	15.0	 16
  3	 23	146.5	18.7	 16
  4	 23	652.5	139.7	 16
  5	 23	97.0	13.1	 16
  6	 23	209.8	22.5	 16
  7	 23	244.3	28.4	 16
  8	 23	231.5	28.4	 16
  9	 23	112.3	17.2	 16
 10	 23	118.8	19.8	 16
 11	 23	176.8	20.1	 16
 12	 23	130.0	16.9	 16
 13	 23	148.5	21.2	 16
 14	 23	143.0	20.0	 16
 15	 23	125.5	15.7	 16
 16	 23	129.5	16.7	 16
 17	 23	140.3	21.3	 16
 18	 23	136.3	13.0	 16
 19	 23	204.8	36.0	 16
 20	 23	117.0	14.1	 16
 21	 23	97.5	15.7	 16
 22	 23	177.8	32.1	 20
 23	 23	195.0	26.2	 16
 24	 23	379.3	27.4	 16
 25	 23	350.0	43.0	 16
 26	 23	127.5	18.1	 16
 27	 23	114.0	13.4	 16
 28	 23	90.8	13.6	 16
 29	 23	134.5	20.9	 16
 30	 23	182.5	38.5	 16
 31	 23	176.0	24.9	 16
 32	 23	321.8	50.3	 16
 33	 23	279.5	51.9	 16
 34	 23	96.3	10.5	 16
 35	 23	155.3	27.7	 16
 36	 23	136.3	18.1	 16
 37	 23	117.0	27.3	 16
 38	 23	88.3	14.9	 16
 39	 23	185.3	28.1	 16
 40	 23	114.3	13.9	 16
 41	 23	126.0	20.2	 16
 42	 23	101.3	18.4	 16
 43	 23	93.0	14.2	 16
 44	 23	232.5	24.8	 16
 45	 23	256.0	32.0	 16
 46	 23	182.8	19.3	 16
 47	 23	120.8	17.3	 16
 48	 23	139.3	22.5	 16
 49	 23	175.0	29.9	 16
 50	 23	106.3	13.8	 16
 51	 23	177.8	24.9	 16
 52	 23	347.3	55.7	 16
 53	 23	351.5	58.1	 16
 54	 23	233.5	29.3	 16
 55	 23	223.5	30.6	 16
 56	 23	121.8	22.2	 16
 57	 23	123.8	16.7	 16
 58	 23	106.0	16.6	 16
 59	 23	115.3	14.8	 16
 60	 23	124.5	17.1	 16
 61	 23	138.8	18.3	 16
 62	 23	153.3	16.6	 16
 63	 23	124.8	12.1	 16
 64	 23	379.0	46.2	 16
 65	 23	142.8	20.8	 16
 66	 23	104.0	16.0	 16
 67	 23	118.0	13.5	 16
 68	 23	83.5	12.3	 16
 69	 23	144.3	18.5	 16
 70	 23	203.8	28.7	 16
 71	 23	106.8	15.1	 16
 72	 23	123.5	17.1	 16
 73	 23	252.8	41.9	 16
 74	 23	136.8	20.2	 16
 75	 23	193.3	21.4	 16
 76	 23	179.5	22.5	 16
 77	 23	92.0	12.7	 16
 78	 23	101.0	14.9	 16
 79	 23	121.8	19.9	 16
 80	 23	124.5	17.8	 16
 81	 23	117.5	18.5	 16
 82	 23	135.3	22.3	 16
 83	 23	114.5	16.6	 16
 84	 23	104.8	18.4	 16
 85	 23	139.8	22.0	 16
 86	 23	100.8	18.5	 16
 87	 23	241.8	30.0	 16
 88	 23	224.3	20.4	 16
 89	 23	139.8	20.8	 16
 90	 23	118.8	18.2	 16
 91	 23	226.0	26.9	 16
 92	 23	230.8	22.4	 16
 93	 23	275.5	26.5	 16
 94	 23	190.3	21.3	 16
 95	 23	134.8	16.5	 16
 96	 23	128.5	20.7	 16
 97	 23	149.8	24.6	 16
 98	 23	138.3	18.7	 16
 99	 23	158.0	26.7	 16
100	 23	158.8	16.8	 16
101	 23	186.5	31.2	 16
102	 23	202.8	24.6	 16
103	 23	135.3	16.8	 16
104	 23	349.0	37.4	 16
105	 23	300.5	33.1	 16
106	 23	223.0	36.4	 16
107	 23	115.0	15.7	 16
108	 23	218.5	31.0	 16
109	 23	100.0	13.1	 16
110	 23	112.8	18.7	 16
111	 23	255.0	43.1	 16
112	 23	197.5	18.2	 16
113	 23	88.3	14.0	 16
114	 23	85.5	13.2	 16
115	 23	172.8	27.2	 16
116	 23	104.3	14.6	 16
117	 23	167.3	26.6	 16
118	 23	125.3	19.5	 16
119	 23	98.8	15.5	 16
120	 23	123.0	17.3	 16
121	 23	181.8	30.1	 16
122	 23	135.3	20.8	 16
123	 23	214.5	32.4	 16
124	 23	143.0	22.6	 16
125	 23	158.0	23.8	 16
126	 23	117.3	19.3	 16
127	 23	180.5	22.2	 16
128	 23	184.5	25.5	 16
129	 23	220.0	27.4	 16
130	 23	193.5	24.3	 16
131	 23	140.3	20.0	 16
132	 23	250.5	36.1	 16
133	 23	634.5	74.0	 16
134	 23	342.0	34.5	 16
135	 23	202.0	24.6	 16
136	 23	610.3	60.9	 16
137	 23	214.8	20.7	 16
138	 23	184.0	24.3	 16
139	 23	184.0	27.3	 16
140	 23	96.3	14.5	 16
141	 23	95.8	17.4	 16
142	 23	115.5	18.1	 16
143	 23	93.3	11.0	 16
144	 23	153.3	19.2	 16
145	 23	164.3	24.4	 16
146	 23	290.8	35.5	 16
147	 23	116.0	18.5	 16
148	 23	120.3	14.2	 16
149	 23	117.5	28.5	 16
150	 23	92.5	17.5	 16
151	 23	124.0	21.1	 16
152	 23	124.8	20.2	 16
153	 23	124.0	19.7	 16
154	 23	102.3	10.9	 16
155	 23	166.3	24.7	 16
156	 23	200.5	27.3	 16
157	 23	116.3	15.5	 16
158	 23	237.5	40.2	 16
159	 23	171.8	28.4	 16
160	 23	814.5	173.6	 16
161	 23	761.3	147.3	 16
162	 23	84.8	12.3	 16
163	 23	99.0	18.7	 16
164	 23	249.0	48.9	 16
165	 23	103.3	11.5	 20
166	 23	104.0	14.3	 16
167	 23	155.3	23.2	 16
168	 23	136.8	19.1	 16
169	 23	185.5	24.8	 16
170	 23	153.8	21.0	 16
171	 23	84.5	7.8	 16
172	 23	181.5	39.0	 16
173	 23	160.0	21.5	 16
174	 23	186.0	19.6	 16
175	 23	120.3	19.9	 16
176	 23	109.0	17.3	 16
177	 23	141.0	13.8	 16
178	 23	134.5	22.7	 16
179	 23	126.0	16.9	 16
180	 23	197.3	31.5	 16
181	 23	181.0	35.2	 16
182	 23	196.5	31.4	 16
183	 23	119.5	15.4	 16
184	 23	187.5	22.7	 16
185	 23	109.5	19.0	 16
186	 23	97.0	19.0	 16
187	 23	131.0	16.8	 16
188	 23	279.3	31.4	 16
189	 23	208.0	27.8	 16
190	 23	122.3	13.3	 16
191	 23	133.5	14.9	 16
192	 23	139.8	24.0	 16
193	 23	163.0	23.0	 16
194	 23	139.0	7.9	 16
195	 23	122.8	20.1	 16
196	 23	224.5	34.5	 16
197	 23	112.0	16.7	 16
198	 23	109.0	14.4	 16
199	 23	109.8	11.7	 16
200	 23	222.8	45.7	 16
201	 23	85.3	13.2	 16
202	 23	95.0	11.6	 16
203	 23	275.5	38.2	 16
204	 23	124.5	19.9	 16
205	 23	126.0	19.5	 16
206	 23	157.0	14.7	 16
207	 23	99.0	19.0	 16
208	 23	93.5	16.5	 16
209	 23	150.3	22.2	 16
210	 23	218.3	20.2	 16
211	 23	358.8	38.6	 16
212	 23	110.8	18.7	 16
213	 23	522.3	81.8	 16
214	 23	98.0	11.8	 16
215	 23	414.5	50.1	 16
216	 23	136.0	18.6	 16
217	 23	122.3	23.4	 16
218	 23	89.3	11.8	 16
219	 23	508.0	119.3	 16
220	 23	122.8	14.3	 16
221	 23	132.3	20.3	 16
222	 23	109.3	19.2	 16
223	 23	82.3	16.0	 16
224	 23	313.3	59.4	 16
225	 23	205.3	17.6	 16
226	 23	138.0	14.3	 16
227	 23	162.3	18.3	 16
228	 23	155.0	19.8	 16
229	 23	160.5	19.0	 16
230	 23	202.3	24.3	 16
231	 23	338.8	46.6	 16
232	 23	341.3	47.7	 16
233	 23	238.3	38.3	 16
234	 23	94.3	12.6	 16
235	 23	533.8	50.3	 16
236	 23	113.0	14.7	 16
237	 23	79.3	11.9	 16
238	 23	88.3	17.1	 16
239	 23	313.0	30.3	 16
240	 23	132.8	19.1	 16
241	 23	185.3	29.1	 16
242	 23	90.0	14.1	 16
243	 23	109.3	18.3	 16
244	 23	145.8	26.4	 16
245	 23	157.8	40.3	 16
246	 23	126.0	17.6	 16
247	 23	88.3	17.1	 16
248	 23	139.5	16.0	 16
249	 23	216.5	29.4	 16
250	 23	131.5	17.2	 16
251	 23	89.5	10.8	 16
252	 23	138.5	16.8	 16
253	 23	99.0	13.3	 16
254	 23	74.3	12.6	 16
255	 23	143.0	171.2	 16
256	 23	198.8	23.4	 16
257	 23	131.5	21.9	 16
258	 23	175.8	24.1	 16
259	 23	188.0	30.7	 16
260	 23	1318.8	192.6	 16
261	 23	1313.0	125.9	 16
262	 23	1086.0	151.0	 16
263	 23	86.8	11.8	 16
264	 23	93.8	18.4	 16
265	 23	84.3	17.3	 16
266	 23	161.0	26.6	 16
267	 23	127.5	24.4	 16
268	 23	144.5	16.3	 16
269	 23	163.3	14.7	 16
270	 23	171.5	23.7	 16
271	 23	104.8	16.9	 16
272	 23	348.5	73.8	 16
273	 23	4863.5	658.4	 16
274	 23	89.5	11.0	 16
275	 23	162.5	31.7	 16
276	 23	291.3	26.3	 16
277	 23	88.0	17.2	 16
278	 23	235.8	27.1	 16
279	 23	378.0	43.9	 16
280	 23	147.3	21.4	 16
281	 23	113.5	19.1	 16
282	 23	164.0	18.3	 16
283	 23	282.0	33.3	 16
284	 23	87.3	14.2	 16
285	 23	73.5	12.5	 16
286	 23	109.3	14.4	 16
287	 23	122.3	24.2	 16
288	 23	92.3	11.4	 16
289	 23	331.3	40.0	 16
290	 23	421.8	64.7	 16
291	 23	201.0	21.8	 16
292	 23	236.0	28.8	 16
293	 23	159.8	25.9	 16
294	 23	162.5	21.8	 16
295	 23	116.5	18.5	 16
296	 23	90.0	16.7	 16
297	 23	89.3	19.1	 16
298	 23	216.5	34.2	 16
299	 23	511.0	98.9	 16
300	 23	117.3	19.4	 16
301	 23	121.0	11.2	 16
302	 23	1643.5	200.2	 16
303	 23	128.0	25.9	 16
304	 23	189.3	28.9	 16
305	 23	181.8	22.7	 16
306	 23	227.8	36.6	 16
307	 23	211.0	29.3	 20
308	 23	101.8	12.4	 16
309	 23	89.5	21.5	 16
310	 23	139.0	20.6	 16
311	 23	225.3	20.4	 16
312	 23	264.3	38.6	 16
313	 23	113.3	13.9	 16
314	 23	174.0	28.4	 16
315	 23	89.3	12.4	 16
316	 23	143.3	17.4	 16
317	 23	132.3	15.1	 16
318	 23	109.8	16.6	 16
319	 23	116.5	15.0	 16
320	 23	107.3	16.4	 16
321	 23	109.3	16.9	 16
322	 23	167.0	26.2	 16
323	 23	108.3	18.6	 16
324	 23	291.0	33.0	 16
325	 23	401.3	50.1	 16
326	 23	149.0	17.3	 16
327	 23	96.3	14.8	 16
328	 23	209.5	27.9	 16
329	 23	113.5	18.3	 16
330	 23	197.5	27.8	 16
331	 23	107.0	15.4	 16
332	 23	127.8	16.7	 16
333	 23	79.8	12.8	 16
334	 23	81.3	12.8	 16
335	 23	102.5	11.9	 16
336	 23	105.3	13.6	 16
337	 23	109.3	17.1	 16
338	 23	149.5	18.4	 16
339	 23	101.0	20.6	 16
340	 23	136.5	22.4	 16
341	 23	117.5	17.3	 16
342	 23	146.0	13.1	 16
343	 23	169.5	21.6	 16
344	 23	170.5	18.5	 16
345	 23	280.3	31.4	 16
346	 23	127.5	23.3	 16
347	 23	115.3	18.2	 16
348	 23	140.8	17.6	 16
349	 23	146.8	29.3	 16
350	 23	100.0	16.1	 16
351	 23	80.5	13.0	 16
352	 23	236.5	33.2	 16
353	 23	96.0	12.6	 16
354	 23	259.8	39.5	 16
355	 23	122.0	21.2	 16
356	 23	211.5	23.9	 16
357	 23	145.5	19.3	 16
358	 23	537.8	60.9	 16
359	 23	280.5	34.9	 16
360	 23	220.3	42.0	 16
361	 23	342.5	37.4	 16
362	 23	650.8	118.2	 16
363	 23	164.8	21.0	 16
364	 23	135.3	23.2	 16
365	 23	206.0	35.3	 16
366	 23	84.8	15.1	 16
367	 23	71.8	16.9	 16
368	 23	88.0	11.3	 16
369	 23	81.0	14.0	 16
370	 23	113.3	16.2	 16
371	 23	93.5	15.0	 16
372	 23	198.5	30.7	 16
373	 23	212.3	34.5	 16
374	 23	71.3	10.9	 16
375	 23	84.5	15.3	 16
376	 23	75.0	11.6	 16
377	 23	193.5	24.6	 16
378	 23	159.0	20.8	 16
379	 23	205.3	24.2	 16
380	 23	167.3	20.3	 16
381	 23	1505.3	221.0	 16
382	 23	198.5	28.2	 16
383	 23	86.0	10.8	 16
384	 23	108.8	18.4	 16
385	 23	124.8	15.2	 16
386	 23	92.0	14.9	 16
387	 23	107.5	17.2	 16
388	 23	89.5	17.0	 16
389	 23	110.5	18.2	 16
390	 23	125.3	16.8	 16
391	 23	459.3	105.3	 16
392	 23	94.8	17.9	 16
393	 23	110.3	16.2	 16
394	 23	164.8	21.1	 16
395	 23	93.5	16.7	 16
396	 23	102.3	15.1	 16
397	 23	311.0	37.2	 16
398	 23	156.3	25.3	 16
399	 23	177.5	29.7	 16
400	 23	400.5	48.3	 16
401	 23	131.3	14.5	 16
402	 23	906.0	114.9	 16
403	 23	3986.8	614.2	 16
404	 23	155.5	22.6	 16
405	 23	1054.5	150.5	 16
406	 23	79.0	13.5	 16
407	 23	97.8	19.6	 16
408	 23	195.8	27.8	 16
409	 23	114.3	18.5	 16
410	 23	138.3	20.1	 16
411	 23	149.0	18.1	 16
412	 23	235.0	31.7	 16
413	 23	199.0	36.7	 16
414	 23	89.0	14.5	 16
415	 23	135.3	15.7	 16
416	 23	144.5	20.4	 16
417	 23	123.3	15.9	 16
418	 23	220.3	29.1	 16
419	 23	165.8	22.5	 16
420	 23	100.0	18.4	 16
421	 23	106.5	15.5	 16
422	 23	396.0	55.4	 16
423	 23	102.8	16.0	 16
424	 23	78.3	10.0	 16
425	 23	90.8	17.9	 16
426	 23	960.8	166.3	 16
427	 23	244.5	54.4	 16
428	 23	226.8	23.0	 16
429	 23	1997.5	409.5	 16
430	 23	980.0	169.3	 16
431	 23	106.0	36.7	 16
432	 23	116.3	27.1	 16
433	 23	100.0	17.2	 16
434	 23	203.0	31.4	 16
435	 23	305.3	44.7	 16
436	 23	214.0	32.1	 16
437	 23	222.0	29.5	 16
438	 23	185.3	33.1	 16
439	 23	468.5	44.5	 16
440	 23	126.3	14.7	 16
441	 23	181.5	16.1	 16
442	 23	416.3	748.4	 16
443	 23	155.3	30.1	 16
444	 23	108.0	20.6	 16
445	 23	250.0	27.2	 16
446	 23	300.0	39.0	 16
447	 23	884.5	70.6	 16
448	 23	377.5	55.5	 16
449	 23	172.0	24.9	 20
450	 23	330.5	44.6	 16
451	 23	181.5	18.8	 16
452	 23	181.8	21.9	 16
453	 23	160.5	29.2	 16
454	 23	120.3	12.6	 16
455	 23	628.3	69.7	 16
456	 23	131.0	18.9	 16
457	 23	145.8	24.4	 16
458	 23	277.0	39.2	 16
459	 23	274.5	37.4	 16
460	 23	134.3	15.5	 16
461	 23	489.3	46.1	 16
462	 23	200.8	19.0	 16
463	 23	133.3	13.1	 16
464	 23	186.8	16.0	 16
465	 23	78.8	8.6	 16
466	 23	72.3	9.0	 16
467	 23	82.0	13.1	 16
468	 23	238.8	32.2	 16
469	 23	172.5	17.2	 16
470	 23	92.5	35.8	 16
471	 23	93.3	14.2	 16
472	 23	431.3	47.6	 16
473	 23	176.5	21.5	 16
474	 23	232.8	23.0	 16
475	 23	414.0	72.3	 16
476	 23	201.3	30.7	 16
477	 23	188.3	27.7	 16
478	 23	112.0	16.6	 16
479	 23	343.8	50.1	 16
480	 23	103.3	13.8	 16
481	 23	80.0	14.6	 16
482	 23	112.0	16.6	 16
483	 23	104.5	15.2	 16
484	 23	443.0	71.5	 16
485	 23	212.0	23.2	 16
486	 23	153.3	34.7	 16
487	 23	145.3	19.0	 16
488	 23	112.0	16.5	 16
489	 23	768.8	129.7	 16
490	 23	108.0	16.0	 16
491	 23	102.5	16.8	 16
492	 23	135.8	26.9	 16
493	 23	725.0	87.8	 16
494	 23	143.5	18.2	 16
495	 23	157.8	20.4	 16
496	 23	122.0	18.1	 16
497	 23	666.0	126.1	 16
498	 23	107.5	19.2	 16
499	 23	247.5	33.5	 16
500	 23	101.0	12.8	 16
501	 23	98.3	12.4	 16
502	 23	138.3	30.2	 16
503	 23	96.3	18.2	 16
504	 23	208.5	28.7	 16
505	 23	408.3	59.6	 16
506	 23	118.5	18.6	 16
507	 23	113.3	15.4	 16
508	 23	89.0	14.4	 16
509	 23	141.3	22.1	 16
510	 23	146.3	22.9	 16
511	 23	377.5	37.3	 16
512	 23	90.3	11.7	 16
513	 23	117.3	16.9	 16
514	 23	74.5	10.6	 16
515	 23	69.8	10.5	 16
516	 23	147.3	18.0	 16
517	 23	109.8	12.7	 16
518	 23	135.3	20.9	 16
519	 23	132.0	16.1	 16
520	 23	150.8	23.2	 16
521	 23	938.3	73.7	 16
522	 23	899.5	159.2	 16
523	 23	190.8	31.6	 16
524	 23	306.3	50.9	 16
525	 23	79.8	14.1	 16
526	 23	117.3	14.0	 16
527	 23	249.3	34.4	 16
528	 23	269.5	45.2	 16
529	 23	267.8	26.0	 16
530	 23	262.5	44.3	 16
531	 23	144.5	17.2	 16
532	 23	5791.8	1488.6	 16
533	 23	125.8	18.0	 16
534	 23	138.3	22.6	 16
535	 23	247.8	39.0	 16
536	 23	117.5	18.4	 16
537	 23	212.3	27.5	 16
538	 23	104.5	13.7	 16
539	 23	117.0	16.9	 16
540	 23	195.0	18.4	 16
541	 23	94.5	14.9	 16
542	 23	94.5	16.6	 16
543	 23	1791.0	229.8	 16
544	 23	190.5	21.9	 16
545	 23	93.0	16.1	 16
546	 23	107.3	12.9	 16
547	 23	157.3	9.8	 16
548	 23	95.8	14.1	 16
549	 23	312.5	35.2	 16
550	 23	157.8	33.4	 16
551	 23	375.5	66.5	 16
552	 23	145.0	24.3	 16
553	 23	337.3	38.5	 16
554	 23	148.0	20.5	 16
555	 23	125.3	17.4	 16
556	 23	191.0	35.5	 16
557	 23	180.0	34.5	 16
558	 23	149.8	20.0	 16
559	 23	78.3	9.3	 16
560	 23	92.3	11.6	 16
561	 23	2627.8	611.5	 16
562	 23	127.0	53.4	 16
563	 23	183.8	17.4	 16
564	 23	184.5	32.1	 16
565	 23	243.8	41.2	 16
566	 23	470.5	111.3	 16
567	 23	523.5	131.0	 16
568	 23	398.8	81.9	 16
569	 23	141.0	23.8	 16
570	 23	129.8	23.4	 16
571	 23	89.3	14.2	 16
572	 23	154.3	31.6	 16
573	 23	886.0	215.8	 16
574	 23	228.3	35.3	 16
575	 23	546.8	127.9	 16
576	 23	102.0	13.6	 16
577	 23	104.3	15.7	 16
578	 23	612.0	199.9	 16
579	 23	134.3	19.9	 16
580	 23	94.8	19.2	 16
581	 23	310.0	68.2	 16
582	 23	257.3	48.3	 16
583	 23	89.5	12.2	 16
584	 23	135.3	23.1	 16
585	 23	90.0	14.5	 16
586	 23	636.8	169.9	 16
587	 23	1251.5	342.8	 16
588	 23	115.0	18.3	 16
589	 23	423.3	104.0	 16
590	 23	249.8	41.6	 16
591	 23	115.3	16.6	 16
592	 23	264.5	50.1	 20
593	 23	197.5	34.4	 16
594	 23	364.8	45.9	 16
595	 23	94.0	15.6	 16
596	 23	160.5	30.6	 16
597	 23	81.3	16.7	 16
598	 23	114.3	15.2	 16
599	 23	305.8	33.9	 16
600	 23	143.5	18.5	 16
601	 23	90.3	11.4	 16
602	 23	118.0	15.8	 16
603	 23	1321.8	263.4	 16
604	 23	110.5	15.8	 16
605	 23	282.5	27.8	 16
606	 23	115.0	16.9	 16
607	 23	187.3	25.8	 16
608	 23	426.8	68.0	 16
609	 23	137.8	18.0	 16
610	 23	146.5	22.5	 16
611	 23	259.5	32.9	 16
612	 23	592.3	46.9	 16
613	 23	246.8	27.1	 16
614	 23	823.0	77.1	 16
615	 23	242.5	27.6	 16
616	 23	305.8	36.5	 16
617	 23	92.0	18.2	 16
618	 23	276.0	32.3	 16
619	 23	166.8	28.6	 16
620	 23	179.8	22.6	 16
621	 23	130.8	17.2	 16
622	 23	181.8	21.2	 16
623	 23	277.0	24.4	 16
624	 23	140.5	20.3	 16
625	 23	152.3	17.6	 16
626	 23	167.5	13.3	 16
627	 23	135.0	16.9	 16
628	 23	148.3	22.7	 16
629	 23	96.3	16.4	 16
630	 23	117.8	14.9	 16
631	 23	241.3	28.5	 16
632	 23	156.3	22.7	 16
633	 23	204.5	32.7	 16
634	 23	767.5	96.0	 16
635	 23	317.3	34.8	 16
636	 23	375.3	57.1	 16
637	 23	360.3	51.7	 16
638	 23	146.0	9.8	 16
639	 23	186.0	23.5	 16
640	 23	388.3	66.2	 16
641	 23	97.3	14.6	 16
642	 23	111.3	17.9	 16
643	 23	124.8	20.2	 16
644	 23	358.5	47.1	 16
645	 23	143.8	17.6	 16
646	 23	213.8	40.8	 16
647	 23	133.5	20.1	 16
648	 23	201.5	33.7	 16
649	 23	164.5	18.5	 16
650	 23	178.0	12.5	 16
651	 23	124.8	20.5	 16
652	 23	96.0	13.7	 16
653	 23	109.0	21.7	 16
654	 23	115.5	16.3	 16
655	 23	111.0	15.6	 16
656	 23	139.8	12.4	 16
657	 23	162.8	21.0	 16
658	 23	194.8	17.4	 16
659	 23	159.8	18.2	 16
660	 23	212.0	31.3	 16
661	 23	85.0	10.0	 16
662	 23	263.0	42.6	 16
663	 23	158.8	22.2	 16
664	 23	173.3	23.2	 16
665	 23	138.0	20.7	 16
666	 23	111.5	14.5	 16
667	 23	149.5	13.6	 16
668	 23	79.3	9.7	 16
669	 23	106.5	24.0	 16
670	 23	98.3	29.4	 16
671	 23	203.0	33.4	 16
672	 23	138.0	20.0	 16
673	 23	104.3	20.4	 16
674	 23	111.3	19.3	 16
675	 23	211.3	24.4	 16
676	 23	336.5	40.4	 16
677	 23	214.8	28.4	 16
678	 23	133.8	20.8	 16
679	 23	84.5	14.5	 16
680	 23	93.3	16.5	 16
681	 23	175.5	23.6	 16
682	 23	348.3	25.2	 16
683	 23	160.5	22.8	 16
684	 23	219.5	29.3	 16
685	 23	126.5	21.1	 16
686	 23	111.3	17.2	 16
687	 23	123.5	20.4	 16
688	 23	279.0	35.1	 16
689	 23	148.8	23.7	 16
690	 23	109.5	16.2	 16
691	 23	154.3	26.1	 16
692	 23	94.5	11.2	 16
693	 23	159.0	25.7	 16
694	 23	205.5	32.7	 16
695	 23	108.5	17.5	 16
696	 23	84.3	9.5	 16
697	 23	90.3	14.2	 16
698	 23	78.3	13.7	 16
699	 23	118.3	20.1	 16
700	 23	332.8	50.6	 16
701	 23	262.5	35.8	 16
702	 23	200.3	16.7	 16
703	 23	238.0	24.5	 16
704	 23	199.5	24.8	 16
705	 23	182.8	27.2	 16
706	 23	198.3	34.9	 16
707	 23	181.3	25.5	 16
708	 23	202.3	29.5	 16
709	 23	198.0	24.3	 16
710	 23	108.8	15.2	 16
711	 23	150.8	19.8	 16
  0	 24	5003.8	1179.8	 16
  1	 24	139.0	22.4	 16
  2	 24	159.3	27.6	 16
  3	 24	122.3	17.5	 16
  4	 24	173.3	27.1	 16
  5	 24	100.8	15.6	 16
  6	 24	216.5	32.9	 16
  7	 24	291.5	24.3	 16
  8	 24	253.0	32.1	 16
  9	 24	126.3	19.5	 16
 10	 24	104.3	12.8	 16
 11	 24	236.5	36.3	 16
 12	 24	132.0	21.4	 16
 13	 24	428.5	47.5	 16
 14	 24	143.3	27.4	 16
 15	 24	186.8	19.2	 16
 16	 24	113.3	19.5	 16
 17	 24	103.3	19.1	 16
 18	 24	150.5	18.9	 16
 19	 24	174.5	23.2	 16
 20	 24	127.5	15.8	 16
 21	 24	110.0	16.4	 16
 22	 24	161.8	16.2	 16
 23	 24	170.5	17.8	 16
 24	 24	450.3	50.2	 16
 25	 24	458.5	38.5	 16
 26	 24	120.0	20.8	 20
 27	 24	107.8	21.2	 16
 28	 24	89.5	9.5	 16
 29	 24	167.0	28.6	 16
 30	 24	201.0	30.5	 16
 31	 24	359.3	54.9	 16
 32	 24	167.8	22.6	 16
 33	 24	174.3	36.7	 16
 34	 24	107.0	18.2	 16
 35	 24	109.5	18.2	 16
 36	 24	197.5	26.6	 16
 37	 24	94.3	12.6	 16
 38	 24	98.0	16.9	 16
 39	 24	136.3	17.8	 16
 40	 24	95.3	15.3	 16
 41	 24	126.5	16.9	 16
 42	 24	110.0	19.5	 16
 43	 24	108.3	15.1	 16
 44	 24	131.8	18.3	 16
 45	 24	341.5	34.7	 16
 46	 24	176.8	15.1	 16
 47	 24	133.8	16.5	 16
 48	 24	133.0	16.7	 16
 49	 24	205.0	25.0	 16
 50	 24	105.5	15.4	 16
 51	 24	147.3	14.1	 16
 52	 24	389.5	38.4	 16
 53	 24	398.3	45.2	 16
 54	 24	318.0	51.6	 16
 55	 24	325.5	31.3	 16
 56	 24	101.3	14.4	 16
 57	 24	106.3	20.6	 16
 58	 24	130.0	22.2	 16
 59	 24	124.5	18.1	 16
 60	 24	98.8	13.4	 16
 61	 24	119.5	16.4	 16
 62	 24	114.0	16.4	 16
 63	 24	132.0	16.8	 16
 64	 24	156.0	19.8	 16
 65	 24	136.3	19.5	 16
 66	 24	109.5	15.5	 16
 67	 24	141.8	23.0	 16
 68	 24	95.5	14.8	 16
 69	 24	124.0	22.2	 16
 70	 24	221.3	27.3	 16
 71	 24	117.0	19.4	 16
 72	 24	120.3	15.7	 16
 73	 24	242.8	26.5	 16
 74	 24	136.0	16.4	 16
 75	 24	134.5	18.6	 16
 76	 24	195.3	21.2	 16
 77	 24	80.0	11.3	 16
 78	 24	91.3	13.3	 16
 79	 24	115.3	13.8	 16
 80	 24	116.0	17.5	 16
 81	 24	114.5	15.9	 16
 82	 24	175.5	23.8	 16
 83	 24	113.0	16.0	 16
 84	 24	94.8	20.9	 16
 85	 24	100.0	15.7	 16
 86	 24	94.3	14.3	 16
 87	 24	113.3	12.0	 16
 88	 24	142.0	19.1	 16
 89	 24	112.0	13.1	 16
 90	 24	111.0	14.4	 16
 91	 24	158.8	20.5	 16
 92	 24	163.8	21.3	 16
 93	 24	127.5	20.3	 16
 94	 24	206.8	24.8	 16
 95	 24	140.3	22.5	 16
 96	 24	139.0	24.0	 16
 97	 24	125.5	16.2	 16
 98	 24	137.5	16.0	 16
 99	 24	125.5	16.6	 16
100	 24	138.3	18.0	 16
101	 24	169.5	28.9	 16
102	 24	199.3	22.4	 16
103	 24	145.8	26.4	 16
104	 24	255.0	35.8	 16
105	 24	271.5	22.5	 16
106	 24	159.0	18.5	 16
107	 24	113.3	18.6	 16
108	 24	122.0	14.4	 16
109	 24	100.3	15.1	 16
110	 24	99.5	12.9	 16
111	 24	125.5	12.6	 16
112	 24	158.0	20.8	 16
113	 24	95.5	11.5	 16
114	 24	86.3	14.3	 16
115	 24	84.0	10.1	 16
116	 24	109.0	14.5	 16
117	 24	133.0	26.3	 16
118	 24	127.3	18.2	 16
119	 24	96.3	14.6	 16
120	 24	104.3	13.7	 16
121	 24	107.3	12.3	 16
122	 24	102.3	16.1	 16
123	 24	109.3	13.0	 16
124	 24	121.5	15.8	 16
125	 24	89.8	14.7	 16
126	 24	125.5	22.6	 16
127	 24	142.5	19.8	 16
128	 24	159.5	22.8	 16
129	 24	162.3	29.9	 16
130	 24	203.5	24.3	 16
131	 24	131.5	27.7	 16
132	 24	157.3	32.0	 16
133	 24	306.3	30.1	 16
134	 24	420.5	54.4	 16
135	 24	173.3	37.1	 16
136	 24	369.8	22.9	 16
137	 24	209.3	24.9	 16
138	 24	138.5	14.5	 16
139	 24	144.0	17.5	 16
140	 24	112.5	18.5	 16
141	 24	101.3	8.9	 16
142	 24	114.0	16.8	 16
143	 24	78.8	11.8	 16
144	 24	131.3	14.3	 16
145	 24	164.5	19.3	 16
146	 24	259.3	32.1	 16
147	 24	100.8	15.9	 16
148	 24	106.5	26.4	 16
149	 24	95.5	10.0	 16
150	 24	99.0	10.7	 16
151	 24	104.5	13.8	 16
152	 24	98.8	16.0	 16
153	 24	109.8	18.0	 16
154	 24	112.0	17.7	 16
155	 24	136.8	23.1	 16
156	 24	129.0	15.9	 16
157	 24	148.3	26.6	 16
158	 24	131.5	16.9	 16
159	 24	115.3	19.1	 16
160	 24	352.0	55.8	 16
161	 24	318.0	27.5	 16
162	 24	82.0	14.2	 16
163	 24	69.0	6.7	 16
164	 24	120.0	14.3	 16
165	 24	116.5	20.5	 16
166	 24	111.0	16.1	 16
167	 24	124.5	22.8	 16
168	 24	138.0	18.0	 16
169	 24	111.8	17.8	 20
170	 24	122.3	24.1	 16
171	 24	89.0	10.3	 16
172	 24	128.3	19.4	 16
173	 24	604.0	81.6	 16
174	 24	124.0	18.4	 16
175	 24	83.3	15.0	 16
176	 24	78.3	11.0	 16
177	 24	108.0	15.9	 16
178	 24	87.0	11.8	 16
179	 24	113.0	18.3	 16
180	 24	232.0	20.4	 16
181	 24	179.0	25.5	 16
182	 24	114.0	20.8	 16
183	 24	129.8	23.4	 16
184	 24	188.3	20.6	 16
185	 24	103.5	22.1	 16
186	 24	89.3	13.2	 16
187	 24	110.5	17.3	 16
188	 24	303.8	34.2	 16
189	 24	349.3	38.3	 16
190	 24	160.8	19.3	 16
191	 24	167.0	24.2	 16
192	 24	180.8	26.8	 16
193	 24	166.5	23.5	 16
194	 24	160.3	16.1	 16
195	 24	108.3	17.9	 16
196	 24	184.8	20.9	 16
197	 24	135.8	19.1	 16
198	 24	114.5	12.9	 16
199	 24	99.5	12.4	 16
200	 24	187.3	24.2	 16
201	 24	87.5	11.2	 16
202	 24	98.5	19.4	 16
203	 24	117.0	16.6	 16
204	 24	89.3	13.0	 16
205	 24	99.3	16.1	 16
206	 24	91.3	11.1	 16
207	 24	74.0	13.6	 16
208	 24	85.0	10.1	 16
209	 24	133.3	21.6	 16
210	 24	103.8	12.8	 16
211	 24	116.0	17.3	 16
212	 24	112.5	24.4	 16
213	 24	162.3	21.1	 16
214	 24	90.3	14.1	 16
215	 24	177.5	21.0	 16
216	 24	87.5	15.0	 16
217	 24	93.3	14.2	 16
218	 24	84.0	10.2	 16
219	 24	217.0	29.7	 16
220	 24	114.0	14.2	 16
221	 24	163.3	22.2	 16
222	 24	81.3	10.3	 16
223	 24	73.3	12.0	 16
224	 24	99.8	15.2	 16
225	 24	147.3	16.5	 16
226	 24	111.0	14.6	 16
227	 24	136.0	11.5	 16
228	 24	120.3	12.7	 16
229	 24	153.3	21.6	 16
230	 24	170.3	16.2	 16
231	 24	223.3	23.6	 16
232	 24	553.8	50.9	 16
233	 24	236.0	38.1	 16
234	 24	94.0	13.9	 16
235	 24	152.0	23.8	 16
236	 24	87.3	12.1	 16
237	 24	82.0	14.9	 16
238	 24	81.0	9.6	 16
239	 24	768.5	62.7	 16
240	 24	135.5	19.7	 16
241	 24	182.3	28.5	 16
242	 24	90.5	7.3	 16
243	 24	87.0	13.7	 16
244	 24	94.8	18.3	 16
245	 24	121.3	14.7	 16
246	 24	116.5	20.5	 16
247	 24	85.3	14.0	 16
248	 24	126.0	22.7	 16
249	 24	205.5	20.0	 16
250	 24	116.0	20.6	 16
251	 24	77.5	8.7	 16
252	 24	146.0	27.1	 16
253	 24	87.3	17.2	 16
254	 24	77.5	10.3	 16
255	 24	85.0	12.3	 16
256	 24	264.8	32.0	 16
257	 24	153.5	24.2	 16
258	 24	213.3	19.6	 16
259	 24	136.0	21.9	 16
260	 24	446.3	63.8	 16
261	 24	494.0	46.4	 16
262	 24	403.5	51.8	 16
263	 24	93.0	18.5	 16
264	 24	105.8	17.5	 16
265	 24	81.8	15.9	 16
266	 24	99.3	16.9	 16
267	 24	120.3	21.6	 16
268	 24	155.5	15.6	 16
269	 24	169.0	24.4	 16
270	 24	114.0	17.7	 16
271	 24	99.0	15.3	 16
272	 24	145.0	22.3	 16
273	 24	851.3	161.8	 16
274	 24	88.5	11.8	 16
275	 24	163.0	26.0	 16
276	 24	213.5	21.7	 16
277	 24	81.3	8.2	 16
278	 24	160.0	18.1	 16
279	 24	156.3	21.8	 16
280	 24	125.0	17.4	 16
281	 24	120.8	22.6	 16
282	 24	190.3	23.4	 16
283	 24	270.5	34.3	 16
284	 24	84.3	13.9	 16
285	 24	85.0	12.8	 16
286	 24	81.5	9.4	 16
287	 24	83.3	12.0	 16
288	 24	92.0	13.6	 16
289	 24	451.8	61.4	 16
290	 24	140.0	19.4	 16
291	 24	230.5	21.8	 16
292	 24	275.3	22.2	 16
293	 24	129.5	16.8	 16
294	 24	151.8	20.3	 16
295	 24	108.8	16.4	 16
296	 24	86.8	17.4	 16
297	 24	84.5	11.3	 16
298	 24	114.0	21.9	 16
299	 24	186.8	34.9	 16
300	 24	114.3	14.7	 16
301	 24	94.8	8.2	 16
302	 24	130.8	19.0	 16
303	 24	138.0	23.7	 16
304	 24	131.5	16.5	 16
305	 24	170.8	15.9	 16
306	 24	132.0	14.4	 16
307	 24	109.8	15.5	 16
308	 24	101.5	17.8	 16
309	 24	89.5	11.5	 16
310	 24	172.0	35.1	 16
311	 24	174.8	25.2	 20
312	 24	113.0	8.8	 16
313	 24	121.0	17.3	 16
314	 24	159.5	21.7	 16
315	 24	89.3	19.9	 16
316	 24	127.0	18.4	 16
317	 24	102.8	13.5	 16
318	 24	97.5	20.8	 16
319	 24	110.0	25.6	 16
320	 24	173.8	26.6	 16
321	 24	120.5	19.5	 16
322	 24	113.3	16.2	 16
323	 24	126.0	24.0	 16
324	 24	110.5	17.0	 16
325	 24	156.3	25.9	 16
326	 24	232.3	37.1	 16
327	 24	106.8	16.0	 16
328	 24	256.5	25.3	 16
329	 24	122.3	15.6	 16
330	 24	127.0	17.3	 16
331	 24	117.8	25.1	 16
332	 24	114.3	16.4	 16
333	 24	83.5	17.5	 16
334	 24	78.8	18.6	 16
335	 24	95.8	10.6	 16
336	 24	96.0	13.2	 16
337	 24	85.5	10.4	 16
338	 24	127.3	37.8	 16
339	 24	90.0	14.9	 16
340	 24	117.0	20.9	 16
341	 24	142.0	22.6	 16
342	 24	138.8	20.6	 16
343	 24	254.3	20.3	 16
344	 24	139.3	14.6	 16
345	 24	350.8	25.2	 16
346	 24	169.5	19.8	 16
347	 24	135.3	20.5	 16
348	 24	155.3	23.9	 16
349	 24	135.8	24.9	 16
350	 24	110.0	10.0	 16
351	 24	70.5	13.4	 16
352	 24	102.0	15.1	 16
353	 24	98.3	13.6	 16
354	 24	116.3	19.2	 16
355	 24	105.5	14.0	 16
356	 24	318.8	28.0	 16
357	 24	125.3	16.7	 16
358	 24	203.5	27.0	 16
359	 24	195.5	23.5	 16
360	 24	145.5	25.8	 16
361	 24	369.8	26.5	 16
362	 24	265.8	36.2	 16
363	 24	109.8	9.8	 16
364	 24	123.0	16.3	 16
365	 24	141.3	21.1	 16
366	 24	87.3	12.8	 16
367	 24	77.3	10.8	 16
368	 24	73.8	11.2	 16
369	 24	76.8	11.5	 16
370	 24	127.8	26.7	 16
371	 24	100.3	15.5	 16
372	 24	151.3	28.9	 16
373	 24	128.5	23.6	 16
374	 24	92.5	17.0	 16
375	 24	95.3	16.6	 16
376	 24	84.0	11.8	 16
377	 24	157.8	17.7	 16
378	 24	246.3	27.5	 16
379	 24	319.0	36.6	 16
380	 24	136.5	13.9	 16
381	 24	361.3	50.6	 16
[truncated: 11,194,044 more chars]
