# Supplementary material for: Identify potential drugs for cardiovascular diseases caused by stress-induced genes in vascular smooth muscle cells
Source: PeerJ. 2016 Sep 28;4:e2478. doi: 10.7717/peerj.2478 (PMC5045879; doi:10.7717/peerj.2478)
Supplement: Supplemental Information 5 [file peerj-04-2478-s005.cel]

[CEL]
Version=3

[HEADER]
Cols=712
Rows=712
TotalX=712
TotalY=712
OffsetX=0
OffsetY=0
GridCornerUL=230 232
GridCornerUR=4507 249
GridCornerLR=4499 4519
GridCornerLL=222 4502
Axis-invertX=0
AxisInvertY=0
swapXY=0
DatHeader=[0..45922]  T 2:CLS=4733 RWS=4733 XIN=3  YIN=3  VE=17        2.0 02/04/03 16:04:26       HG-U133A.1sq                  6
Algorithm=Percentile
AlgorithmParameters=Percentile:75;CellMargin:2;OutlierHigh:1.500;OutlierLow:1.004

[INTENSITY]
NumberCells=506944
CellHeader=X	Y	MEAN	STDV	NPIXELS
  0	  0	117.0	22.3	 16
  1	  0	9380.0	862.2	 16
  2	  0	118.0	16.5	 16
  3	  0	9459.3	877.6	 16
  4	  0	62.3	11.5	 16
  5	  0	109.0	17.7	 16
  6	  0	9036.0	839.5	 16
  7	  0	102.5	15.7	 16
  8	  0	9023.3	843.4	 16
  9	  0	108.5	15.0	 16
 10	  0	8939.3	840.2	 16
 11	  0	104.8	17.4	 16
 12	  0	9164.5	967.6	 16
 13	  0	113.3	19.3	 16
 14	  0	8997.8	940.5	 16
 15	  0	97.8	16.1	 16
 16	  0	8930.0	1026.9	 16
 17	  0	96.3	13.7	 16
 18	  0	8937.3	1161.7	 16
 19	  0	116.5	17.5	 16
 20	  0	8792.0	1284.3	 16
 21	  0	113.3	19.0	 16
 22	  0	8856.8	2189.0	 16
 23	  0	115.3	20.6	 16
 24	  0	9094.5	2185.6	 16
 25	  0	98.3	11.0	 16
 26	  0	9087.3	2102.0	 16
 27	  0	97.8	18.0	 16
 28	  0	8988.5	2044.7	 16
 29	  0	103.5	15.2	 16
 30	  0	9132.5	1971.5	 16
 31	  0	102.5	16.2	 16
 32	  0	9233.5	2005.6	 16
 33	  0	202.8	74.3	 16
 34	  0	9512.0	1986.9	 16
 35	  0	311.5	92.4	 16
 36	  0	9259.5	1942.9	 16
 37	  0	117.3	16.3	 16
 38	  0	9176.8	1799.9	 16
 39	  0	109.0	19.0	 16
 40	  0	8962.3	1698.2	 16
 41	  0	112.3	19.0	 16
 42	  0	9156.8	1727.0	 16
 43	  0	111.8	18.7	 16
 44	  0	9019.0	1663.6	 16
 45	  0	118.3	12.9	 16
 46	  0	8648.0	1437.0	 16
 47	  0	106.3	10.7	 16
 48	  0	8784.0	1414.6	 16
 49	  0	107.3	14.0	 16
 50	  0	8626.3	1284.2	 16
 51	  0	120.3	18.6	 16
 52	  0	8539.3	1258.6	 16
 53	  0	107.0	14.3	 16
 54	  0	8730.8	1302.6	 16
 55	  0	96.3	14.9	 16
 56	  0	8395.5	1092.6	 16
 57	  0	107.3	19.8	 16
 58	  0	8694.8	1260.2	 16
 59	  0	117.3	307.2	 20
 60	  0	8051.5	2934.1	 16
 61	  0	261.5	283.1	 16
 62	  0	7670.5	2856.9	 16
 63	  0	226.8	250.5	 16
 64	  0	8201.0	2931.4	 16
 65	  0	196.5	238.5	 16
 66	  0	7856.5	2930.4	 16
 67	  0	186.5	225.7	 16
 68	  0	8017.0	2856.5	 16
 69	  0	177.3	183.3	 16
 70	  0	7848.8	2745.8	 16
 71	  0	162.0	158.8	 16
 72	  0	7946.0	2768.4	 16
 73	  0	179.3	137.2	 16
 74	  0	7998.5	2697.4	 16
 75	  0	167.8	122.4	 16
 76	  0	8108.5	2666.6	 16
 77	  0	150.0	90.8	 16
 78	  0	8054.8	2558.8	 16
 79	  0	145.3	71.7	 16
 80	  0	8200.8	2502.6	 16
 81	  0	128.8	55.2	 16
 82	  0	8314.3	2405.7	 16
 83	  0	139.8	47.4	 16
 84	  0	8235.3	2192.9	 16
 85	  0	110.8	30.0	 16
 86	  0	8104.3	2037.0	 16
 87	  0	125.3	26.6	 16
 88	  0	8184.3	1974.8	 16
 89	  0	126.0	24.8	 16
 90	  0	8248.3	1819.4	 16
 91	  0	101.8	26.4	 16
 92	  0	8306.3	1722.9	 16
 93	  0	113.0	22.2	 16
 94	  0	8133.8	1523.2	 16
 95	  0	131.5	22.6	 16
 96	  0	8416.0	1523.8	 16
 97	  0	108.3	17.0	 16
 98	  0	8224.3	1405.6	 16
 99	  0	102.3	14.5	 16
100	  0	8346.3	1345.1	 16
101	  0	116.5	22.4	 16
102	  0	8215.5	1255.7	 16
103	  0	110.3	22.2	 16
104	  0	8360.8	1279.5	 16
105	  0	105.0	15.0	 16
106	  0	7960.5	1715.4	 16
107	  0	102.5	13.5	 16
108	  0	7868.8	1641.2	 16
109	  0	106.3	18.9	 16
110	  0	7985.0	1582.5	 16
111	  0	102.8	21.6	 16
112	  0	8067.3	1564.0	 16
113	  0	104.5	18.8	 16
114	  0	8145.3	1500.6	 16
115	  0	103.3	20.4	 16
116	  0	8153.0	1506.4	 16
117	  0	104.0	18.3	 16
118	  0	7871.3	1345.5	 16
119	  0	101.3	14.6	 16
120	  0	7731.5	1314.7	 16
121	  0	97.3	17.3	 16
122	  0	7747.3	1279.5	 16
123	  0	102.0	13.6	 16
124	  0	7671.8	1276.0	 16
125	  0	99.3	12.5	 16
126	  0	7384.5	1217.0	 16
127	  0	104.5	18.6	 16
128	  0	7314.5	1309.6	 16
129	  0	91.8	18.5	 16
130	  0	7225.0	1334.5	 16
131	  0	100.3	18.7	 16
132	  0	7172.3	1418.0	 16
133	  0	109.5	19.0	 16
134	  0	7093.0	1472.7	 16
135	  0	108.3	21.0	 16
136	  0	6930.0	1515.0	 16
137	  0	124.5	24.5	 16
138	  0	6998.5	1555.4	 16
139	  0	110.0	17.2	 16
140	  0	6930.8	1594.9	 16
141	  0	113.3	15.1	 16
142	  0	7270.3	1603.2	 16
143	  0	106.0	21.6	 16
144	  0	7445.0	1574.8	 16
145	  0	102.5	14.0	 16
146	  0	7327.8	1489.8	 16
147	  0	98.5	23.4	 16
148	  0	7503.3	1847.0	 16
149	  0	94.8	13.7	 16
150	  0	7438.5	1718.4	 16
151	  0	104.8	14.8	 16
152	  0	7612.3	1581.3	 16
153	  0	107.3	17.5	 16
154	  0	7500.5	1444.0	 16
155	  0	115.5	19.5	 16
156	  0	7675.8	1353.3	 16
157	  0	103.0	17.1	 16
158	  0	7796.8	1315.3	 16
159	  0	110.3	18.5	 16
160	  0	7510.0	1087.6	 16
161	  0	110.5	15.6	 16
162	  0	7289.0	1067.6	 16
163	  0	103.8	11.7	 16
164	  0	6954.8	819.9	 16
165	  0	94.0	15.0	 16
166	  0	6916.3	727.2	 16
167	  0	104.0	18.0	 16
168	  0	6731.3	621.4	 16
169	  0	99.3	16.5	 16
170	  0	6759.5	579.4	 16
171	  0	93.5	17.4	 16
172	  0	6544.8	437.1	 16
173	  0	96.3	14.5	 16
174	  0	6517.0	434.0	 16
175	  0	107.5	16.1	 16
176	  0	6465.8	394.0	 16
177	  0	103.8	21.3	 16
178	  0	6622.0	1711.0	 20
179	  0	117.0	49.5	 16
180	  0	6829.5	2031.0	 16
181	  0	138.3	55.7	 16
182	  0	7024.0	2150.0	 16
183	  0	138.8	73.0	 16
184	  0	6825.8	2199.8	 16
185	  0	154.3	103.8	 16
186	  0	6811.3	2286.2	 16
187	  0	178.0	101.4	 16
188	  0	7228.0	2462.6	 12
189	  0	152.0	105.5	 16
190	  0	7235.3	2407.6	 16
191	  0	141.0	81.3	 16
192	  0	7236.0	2380.3	 16
193	  0	119.0	66.7	 16
194	  0	7209.0	2214.8	 16
195	  0	113.0	41.8	 16
196	  0	7342.3	2075.8	 16
197	  0	124.3	31.8	 16
198	  0	7226.0	1925.0	 16
199	  0	103.5	18.7	 16
200	  0	7123.5	1749.7	 16
201	  0	92.5	14.7	 16
202	  0	7255.8	1712.1	 16
203	  0	101.5	23.8	 16
204	  0	7081.3	1612.8	 16
205	  0	99.0	16.8	 16
206	  0	6952.5	1525.9	 16
207	  0	114.3	18.9	 16
208	  0	7102.5	1534.4	 16
209	  0	94.8	17.4	 16
210	  0	7080.5	1512.0	 16
211	  0	97.5	18.5	 16
212	  0	6764.5	1385.5	 16
213	  0	108.3	27.0	 16
214	  0	6599.3	1316.3	 16
215	  0	103.0	20.8	 16
216	  0	6661.0	1284.2	 16
217	  0	101.0	18.8	 16
218	  0	6902.8	1286.8	 16
219	  0	97.8	17.2	 16
220	  0	6750.8	1210.5	 16
221	  0	89.5	18.8	 16
222	  0	6995.8	1238.0	 16
223	  0	84.3	15.4	 16
224	  0	6879.5	1107.9	 16
225	  0	92.0	13.3	 16
226	  0	6860.0	1157.7	 16
227	  0	113.5	20.9	 16
228	  0	6675.5	1100.0	 16
229	  0	92.3	15.2	 16
230	  0	6847.3	1617.8	 16
231	  0	106.0	15.9	 16
232	  0	6575.3	1510.9	 16
233	  0	92.5	15.3	 16
234	  0	6470.0	1430.9	 16
235	  0	48.3	7.2	 16
236	  0	2951.3	675.6	 16
237	  0	47.5	7.3	 16
238	  0	79.3	14.4	 16
239	  0	55.5	8.3	 16
240	  0	6552.8	1175.4	 16
241	  0	97.5	14.9	 16
242	  0	6440.8	1143.9	 16
243	  0	111.3	23.3	 16
244	  0	6543.8	1216.2	 16
245	  0	94.3	18.3	 16
246	  0	6394.8	1143.9	 16
247	  0	86.5	10.8	 16
248	  0	6580.8	1145.8	 16
249	  0	98.0	21.6	 16
250	  0	6570.5	994.2	 16
251	  0	86.0	14.3	 16
252	  0	6370.0	916.8	 16
253	  0	85.5	11.6	 16
254	  0	6430.0	870.9	 16
255	  0	102.5	18.7	 16
256	  0	6273.3	837.2	 16
257	  0	92.3	13.8	 16
258	  0	6410.0	816.2	 16
259	  0	103.5	17.8	 16
260	  0	6425.0	807.8	 16
261	  0	85.8	17.2	 16
262	  0	6056.0	680.1	 16
263	  0	96.3	13.1	 16
264	  0	6452.3	747.4	 16
265	  0	87.0	12.4	 16
266	  0	6306.3	660.8	 16
267	  0	93.3	14.8	 16
268	  0	6430.5	804.0	 16
269	  0	82.3	11.7	 16
270	  0	5954.8	764.3	 16
271	  0	109.8	23.5	 16
272	  0	6009.3	1343.2	 16
273	  0	135.8	25.3	 16
274	  0	5967.5	1230.0	 16
275	  0	173.5	41.6	 16
276	  0	5904.8	1251.8	 16
277	  0	137.0	19.7	 16
278	  0	5987.8	1116.1	 16
279	  0	94.5	15.1	 16
280	  0	6074.5	1116.7	 16
281	  0	82.8	15.6	 16
282	  0	6111.0	1009.2	 16
283	  0	90.8	18.2	 16
284	  0	6261.3	943.0	 16
285	  0	85.8	14.7	 16
286	  0	6286.5	949.4	 16
287	  0	85.3	10.8	 16
288	  0	6260.0	987.2	 16
289	  0	97.0	11.7	 16
290	  0	6341.0	847.1	 16
291	  0	87.0	14.3	 16
292	  0	6232.5	811.1	 16
293	  0	82.5	12.9	 16
294	  0	6357.3	835.3	 16
295	  0	86.0	13.3	 16
296	  0	6193.8	732.6	 16
297	  0	102.0	122.8	 20
298	  0	6419.5	2273.2	 16
299	  0	181.3	152.6	 16
300	  0	6178.0	2258.7	 16
301	  0	184.5	172.1	 16
302	  0	6337.0	2316.6	 16
303	  0	218.8	185.7	 16
304	  0	5905.8	2206.1	 16
305	  0	192.0	181.3	 16
306	  0	5814.3	2193.7	 16
307	  0	198.0	181.7	 16
308	  0	5905.5	2210.0	 16
309	  0	182.5	183.9	 16
310	  0	5755.8	2185.0	 16
311	  0	185.5	175.5	 16
312	  0	5648.5	2106.0	 16
313	  0	197.5	192.3	 16
314	  0	6132.5	2274.0	 16
315	  0	167.3	207.0	 16
316	  0	6558.3	2373.6	 16
317	  0	163.3	185.3	 16
318	  0	6490.5	2344.0	 16
319	  0	172.8	153.4	 16
320	  0	6756.8	2394.5	 16
321	  0	135.8	142.9	 16
322	  0	7027.5	2447.4	 16
323	  0	132.8	106.9	 16
324	  0	6867.8	2333.4	 16
325	  0	134.8	82.3	 16
326	  0	7173.3	2322.1	 16
327	  0	136.8	66.9	 16
328	  0	7217.5	2254.9	 16
329	  0	122.3	41.9	 16
330	  0	7034.3	2116.1	 16
331	  0	106.0	31.9	 16
332	  0	7240.8	2007.7	 16
333	  0	111.0	25.1	 16
334	  0	7005.5	1858.1	 16
335	  0	110.8	29.4	 16
336	  0	6926.0	1714.6	 16
337	  0	82.8	12.6	 16
338	  0	6658.0	1569.2	 16
339	  0	90.5	14.9	 16
340	  0	6809.5	1519.6	 16
341	  0	91.0	11.6	 16
342	  0	6989.3	1359.1	 16
343	  0	94.3	13.2	 16
344	  0	7081.5	1312.5	 16
345	  0	81.3	15.4	 16
346	  0	7183.3	1200.2	 16
347	  0	94.8	17.0	 16
348	  0	7078.5	1183.6	 16
349	  0	84.0	10.0	 16
350	  0	6946.0	1070.5	 16
351	  0	83.3	11.9	 16
352	  0	7032.3	1095.1	 16
353	  0	94.5	12.3	 16
354	  0	7062.0	1082.4	 16
355	  0	98.3	10.6	 16
356	  0	7110.5	1500.0	 16
357	  0	107.0	24.9	 16
358	  0	7194.8	1356.2	 16
359	  0	119.3	19.1	 16
360	  0	7362.8	1505.8	 16
361	  0	96.5	16.8	 16
362	  0	7333.8	1384.5	 16
363	  0	80.5	15.0	 16
364	  0	7379.8	1224.5	 16
365	  0	89.8	16.5	 16
366	  0	7462.0	1197.6	 16
367	  0	95.0	17.2	 16
368	  0	7389.3	1131.4	 16
369	  0	95.3	12.8	 16
370	  0	7480.8	1114.6	 16
371	  0	101.3	12.6	 16
372	  0	7461.3	909.2	 16
373	  0	105.0	17.7	 16
374	  0	7557.0	930.1	 16
375	  0	91.3	14.0	 16
376	  0	7331.5	691.4	 16
377	  0	102.8	15.0	 16
378	  0	7629.5	745.5	 16
379	  0	90.0	12.5	 16
380	  0	7362.0	676.0	 16
381	  0	94.5	13.2	 16
382	  0	7418.5	618.1	 16
383	  0	85.0	16.9	 16
384	  0	7235.3	619.5	 16
385	  0	94.5	14.5	 16
386	  0	7211.8	526.4	 16
387	  0	94.8	17.2	 16
388	  0	7357.0	565.1	 16
389	  0	88.3	12.7	 16
390	  0	7312.8	530.9	 16
391	  0	85.3	14.3	 16
392	  0	7365.5	564.3	 16
393	  0	98.0	14.4	 16
394	  0	7416.5	538.9	 16
395	  0	79.3	10.4	 16
396	  0	7839.5	712.3	 16
397	  0	88.5	18.5	 16
398	  0	7957.8	1595.7	 16
399	  0	87.5	15.9	 16
400	  0	7654.3	1381.4	 16
401	  0	102.0	20.4	 16
402	  0	7844.3	1394.0	 16
403	  0	103.5	19.9	 16
404	  0	7721.8	1235.7	 16
405	  0	94.5	13.5	 16
406	  0	8029.5	1211.7	 16
407	  0	92.0	14.2	 16
408	  0	7891.8	1102.7	 16
409	  0	105.5	17.6	 16
410	  0	8011.8	1066.3	 16
411	  0	86.5	11.1	 16
412	  0	7655.0	942.5	 16
413	  0	91.3	17.0	 16
414	  0	7494.0	767.1	 16
415	  0	97.5	17.3	 16
416	  0	7519.0	2094.5	 20
417	  0	132.8	59.3	 16
418	  0	7680.3	2243.0	 16
419	  0	113.0	59.1	 16
420	  0	7802.5	2286.9	 16
421	  0	158.3	46.3	 16
422	  0	7495.5	2132.7	 16
423	  0	125.3	27.7	 16
424	  0	7428.5	2072.7	 16
425	  0	98.3	30.7	 16
426	  0	7130.3	2007.7	 16
427	  0	112.3	32.3	 16
428	  0	7220.3	1998.3	 16
429	  0	112.8	26.4	 16
430	  0	7359.3	2058.5	 16
431	  0	102.3	34.2	 16
432	  0	7484.0	2049.4	 16
433	  0	99.8	23.3	 16
434	  0	7620.0	2118.5	 16
435	  0	116.5	21.7	 16
436	  0	7130.8	2009.5	 16
437	  0	107.0	29.2	 16
438	  0	7354.0	2024.8	 16
439	  0	118.0	38.5	 16
440	  0	7244.0	2195.9	 16
441	  0	94.3	22.7	 16
442	  0	7408.5	2235.1	 16
443	  0	120.5	27.7	 16
444	  0	7457.0	2118.5	 16
445	  0	107.3	25.6	 16
446	  0	7577.0	2218.7	 16
447	  0	116.3	26.6	 16
448	  0	7391.5	2074.6	 16
449	  0	95.3	14.6	 16
450	  0	7467.0	2032.2	 16
451	  0	111.0	21.0	 16
452	  0	7532.0	2030.8	 16
453	  0	100.8	24.0	 16
454	  0	7490.3	1917.8	 16
455	  0	95.8	11.4	 16
456	  0	7478.3	1805.5	 16
457	  0	97.8	14.2	 16
458	  0	7661.3	1811.2	 16
459	  0	104.8	17.6	 16
460	  0	7712.0	1703.0	 16
461	  0	106.5	17.4	 16
462	  0	7640.8	1578.7	 16
463	  0	96.0	10.6	 16
464	  0	7826.5	1529.9	 16
465	  0	104.3	14.8	 16
466	  0	7922.3	1420.4	 16
467	  0	96.8	13.5	 16
468	  0	8287.3	1490.3	 16
469	  0	103.8	19.0	 16
470	  0	8151.5	1424.4	 16
471	  0	77.3	11.7	 16
472	  0	53.8	11.7	 16
473	  0	5018.8	970.9	 16
474	  0	52.8	13.5	 16
475	  0	82.0	12.4	 16
476	  0	53.3	7.9	 16
477	  0	96.5	14.2	 16
478	  0	8007.0	1446.3	 16
479	  0	104.0	12.7	 16
480	  0	7886.0	1420.7	 16
481	  0	107.3	15.7	 16
482	  0	7750.5	1956.9	 16
483	  0	87.3	18.1	 16
484	  0	7606.8	1970.4	 16
485	  0	100.5	15.8	 16
486	  0	7356.5	1801.0	 16
487	  0	97.8	21.0	 16
488	  0	7142.3	1750.2	 16
489	  0	99.3	12.9	 16
490	  0	7238.8	1714.3	 16
491	  0	104.8	24.9	 16
492	  0	7257.3	1667.7	 16
493	  0	99.3	14.2	 16
494	  0	7327.5	1624.3	 16
495	  0	118.0	24.1	 16
496	  0	7504.5	1622.0	 16
497	  0	110.0	14.7	 16
498	  0	7404.5	1543.9	 16
499	  0	105.3	20.5	 16
500	  0	7556.5	1574.4	 16
501	  0	95.3	21.5	 16
502	  0	7417.8	1447.2	 16
503	  0	117.5	20.9	 16
504	  0	7343.3	1386.1	 16
505	  0	102.8	15.9	 16
506	  0	7569.0	1340.4	 16
507	  0	96.8	17.0	 16
508	  0	7896.0	1271.0	 16
509	  0	109.0	23.5	 16
510	  0	7806.0	1268.6	 16
511	  0	93.5	18.0	 16
512	  0	7861.3	1138.9	 16
513	  0	103.3	16.2	 16
514	  0	7786.3	1061.4	 16
515	  0	90.3	19.8	 16
516	  0	7873.5	953.3	 16
517	  0	103.0	12.4	 16
518	  0	7809.5	924.5	 16
519	  0	94.0	14.9	 16
520	  0	8030.5	926.2	 16
521	  0	120.0	19.8	 16
522	  0	8013.8	988.4	 16
523	  0	101.5	16.7	 16
524	  0	8106.0	1811.8	 16
525	  0	98.8	20.0	 16
526	  0	8319.5	1652.2	 16
527	  0	97.5	14.9	 16
528	  0	7838.3	1462.2	 16
529	  0	101.8	19.7	 16
530	  0	8037.3	1329.2	 16
531	  0	97.8	21.9	 16
532	  0	7901.5	1279.3	 16
533	  0	100.0	14.0	 16
534	  0	7958.0	2190.4	 20
535	  0	126.0	48.0	 16
536	  0	8100.8	2314.9	 16
537	  0	114.8	45.0	 16
538	  0	7967.0	2182.9	 16
539	  0	135.5	44.0	 16
540	  0	8119.8	2199.1	 16
541	  0	121.5	32.7	 16
542	  0	7854.3	2087.6	 16
543	  0	113.8	46.6	 16
544	  0	7775.5	1940.6	 16
545	  0	120.5	36.1	 16
546	  0	7934.8	1942.4	 16
547	  0	109.3	34.0	 16
548	  0	7923.5	1916.0	 16
549	  0	106.0	31.6	 16
550	  0	7873.3	1829.0	 16
551	  0	119.0	35.9	 16
552	  0	7972.0	1790.3	 16
553	  0	106.3	24.8	 16
554	  0	8085.5	1692.4	 16
555	  0	112.0	26.9	 16
556	  0	8141.8	1577.4	 16
557	  0	110.3	25.5	 16
558	  0	8126.0	1575.1	 16
559	  0	121.3	25.7	 16
560	  0	8203.3	1412.8	 16
561	  0	118.5	25.2	 16
562	  0	8015.0	1351.7	 16
563	  0	115.5	24.2	 16
564	  0	8052.3	1390.3	 16
565	  0	144.5	25.2	 16
566	  0	8152.0	1798.2	 16
567	  0	107.0	12.9	 16
568	  0	8161.0	1681.3	 16
569	  0	107.3	21.0	 16
570	  0	7919.0	1507.7	 16
571	  0	102.3	27.9	 16
572	  0	7801.8	1424.1	 16
573	  0	98.0	23.0	 16
574	  0	7885.3	1346.0	 16
575	  0	101.3	13.8	 16
576	  0	7896.5	1237.6	 16
577	  0	73.8	17.1	 16
578	  0	7978.3	1082.9	 16
579	  0	94.3	14.8	 16
580	  0	8003.0	929.4	 16
581	  0	105.3	13.6	 16
582	  0	8187.5	961.3	 16
583	  0	88.0	13.3	 16
584	  0	8147.3	866.0	 16
585	  0	114.5	24.3	 16
586	  0	7917.5	697.7	 16
587	  0	93.3	14.7	 16
588	  0	7959.0	706.4	 16
589	  0	92.0	10.4	 16
590	  0	7798.0	506.9	 16
591	  0	98.8	15.7	 16
592	  0	8137.3	579.1	 16
593	  0	96.8	13.3	 16
594	  0	7808.8	614.3	 16
595	  0	105.0	15.6	 16
596	  0	7788.8	576.0	 16
597	  0	90.0	12.3	 16
598	  0	7870.0	537.8	 16
599	  0	87.3	13.3	 16
600	  0	8040.5	624.5	 16
601	  0	107.0	16.0	 16
602	  0	8071.5	635.7	 16
603	  0	89.5	17.3	 16
604	  0	8246.3	734.9	 16
605	  0	103.5	15.4	 16
606	  0	8481.5	893.5	 16
607	  0	107.8	18.4	 16
608	  0	8303.3	1509.2	 16
609	  0	100.8	16.3	 16
610	  0	8432.0	1568.9	 16
611	  0	104.0	21.4	 16
612	  0	8231.5	1450.4	 16
613	  0	90.0	15.8	 16
614	  0	8536.0	1367.9	 16
615	  0	111.0	29.2	 16
616	  0	8443.8	1185.1	 16
617	  0	98.5	11.7	 16
618	  0	8541.0	1144.3	 16
619	  0	99.8	17.4	 16
620	  0	8492.8	987.5	 16
621	  0	93.3	11.2	 16
622	  0	8516.3	894.8	 16
623	  0	100.8	9.9	 16
624	  0	8551.8	679.8	 16
625	  0	107.0	17.2	 16
626	  0	8697.8	644.0	 16
627	  0	112.0	15.5	 16
628	  0	8679.5	532.7	 16
629	  0	108.0	15.2	 16
630	  0	8769.5	809.2	 16
631	  0	98.5	13.1	 16
632	  0	8493.0	540.9	 16
633	  0	106.5	24.7	 16
634	  0	8396.0	483.1	 16
635	  0	94.8	21.5	 16
636	  0	8484.5	456.6	 16
637	  0	102.3	14.6	 16
638	  0	8624.8	481.5	 16
639	  0	109.3	15.5	 16
640	  0	8507.8	515.1	 16
641	  0	100.5	9.9	 16
642	  0	8537.8	595.7	 16
643	  0	114.0	20.8	 16
644	  0	8469.0	600.0	 16
645	  0	115.0	23.7	 16
646	  0	8512.8	669.7	 16
647	  0	103.5	19.6	 16
648	  0	8716.3	838.2	 16
649	  0	107.3	16.2	 16
650	  0	8615.0	1634.5	 16
651	  0	91.3	17.9	 16
652	  0	8567.8	1571.5	 16
653	  0	96.5	25.0	 20
654	  0	8373.5	1967.1	 16
655	  0	106.0	27.3	 16
656	  0	8670.8	1972.1	 16
657	  0	100.5	33.7	 16
658	  0	8574.0	1908.4	 16
659	  0	116.0	33.5	 16
660	  0	8592.8	2062.5	 16
661	  0	97.3	31.1	 16
662	  0	8436.8	1845.7	 16
663	  0	111.0	28.6	 16
664	  0	8594.5	1881.2	 16
665	  0	118.3	25.9	 16
666	  0	8543.5	1791.9	 16
667	  0	125.3	39.8	 16
668	  0	8730.0	1887.9	 16
669	  0	113.5	29.4	 16
670	  0	8707.5	1769.6	 16
671	  0	113.5	25.4	 16
672	  0	8717.8	1692.2	 16
673	  0	129.0	24.5	 16
674	  0	8620.0	1649.9	 16
675	  0	122.8	26.5	 16
676	  0	8883.0	1603.5	 16
677	  0	120.3	26.2	 16
678	  0	8701.0	1621.1	 16
679	  0	121.0	25.6	 16
680	  0	8924.8	1480.9	 16
681	  0	123.5	26.7	 16
682	  0	9090.5	1490.9	 16
683	  0	114.5	22.3	 16
684	  0	9174.8	1414.7	 16
685	  0	111.3	24.5	 16
686	  0	9127.8	1374.3	 16
687	  0	116.5	23.5	 16
688	  0	9231.0	1410.6	 16
689	  0	114.8	20.4	 16
690	  0	9264.8	1388.7	 16
691	  0	114.3	21.6	 16
692	  0	9538.8	2051.2	 16
693	  0	99.8	18.1	 16
694	  0	9425.8	1852.4	 16
695	  0	111.0	17.4	 16
696	  0	9355.0	1679.0	 16
697	  0	107.5	25.1	 16
698	  0	9053.0	1628.6	 16
699	  0	105.8	24.2	 16
700	  0	9019.3	1512.5	 16
701	  0	96.3	15.8	 16
702	  0	9286.3	1386.8	 16
703	  0	115.5	20.9	 16
704	  0	9221.3	1208.8	 16
705	  0	104.3	14.1	 16
706	  0	9500.3	1207.7	 16
707	  0	58.0	9.0	 16
708	  0	123.8	18.1	 16
709	  0	9594.8	1114.3	 16
710	  0	125.3	19.4	 16
711	  0	9552.3	1147.4	 16
  0	  1	9291.0	916.8	 16
  1	  1	118.8	18.8	 16
  2	  1	8817.3	831.4	 16
  3	  1	115.8	18.7	 16
  4	  1	61.5	9.6	 16
  5	  1	260.3	31.3	 16
  6	  1	130.0	25.7	 16
  7	  1	80.0	13.9	 16
  8	  1	180.0	26.8	 16
  9	  1	110.0	17.9	 16
 10	  1	134.5	16.3	 16
 11	  1	109.0	16.8	 16
 12	  1	111.0	19.2	 16
 13	  1	173.0	53.2	 16
 14	  1	188.3	21.4	 16
 15	  1	155.5	22.5	 16
 16	  1	190.8	34.0	 16
 17	  1	177.8	36.6	 16
 18	  1	80.8	15.2	 16
 19	  1	340.0	52.1	 16
 20	  1	542.5	104.1	 16
 21	  1	64.0	11.5	 16
 22	  1	814.3	199.8	 16
 23	  1	105.3	21.4	 16
 24	  1	320.8	44.6	 16
 25	  1	1063.3	162.3	 16
 26	  1	390.0	76.6	 16
 27	  1	330.0	21.4	 16
 28	  1	133.3	18.4	 16
 29	  1	341.5	57.8	 16
 30	  1	92.0	15.4	 16
 31	  1	69.0	8.6	 16
 32	  1	106.0	16.1	 16
 33	  1	176.8	39.8	 16
 34	  1	534.3	45.3	 16
 35	  1	363.0	47.8	 16
 36	  1	216.0	24.1	 16
 37	  1	122.0	17.3	 16
 38	  1	478.0	85.4	 16
 39	  1	149.3	26.6	 16
 40	  1	269.3	33.5	 16
 41	  1	119.5	19.0	 16
 42	  1	962.5	169.8	 16
 43	  1	282.5	35.7	 16
 44	  1	111.8	15.8	 16
 45	  1	730.0	97.8	 16
 46	  1	121.3	13.2	 16
 47	  1	785.8	125.9	 16
 48	  1	148.5	21.4	 16
 49	  1	215.0	29.2	 16
 50	  1	175.0	22.3	 16
 51	  1	201.0	18.7	 16
 52	  1	557.3	91.0	 16
 53	  1	98.3	14.8	 16
 54	  1	109.3	19.0	 16
 55	  1	178.3	30.6	 16
 56	  1	177.5	20.8	 16
 57	  1	244.8	32.6	 16
 58	  1	2326.5	402.2	 16
 59	  1	87.0	15.2	 16
 60	  1	124.3	22.5	 16
 61	  1	114.3	29.2	 20
 62	  1	212.3	59.5	 16
 63	  1	79.5	12.8	 16
 64	  1	289.3	69.1	 16
 65	  1	151.3	25.8	 16
 66	  1	378.8	97.1	 16
 67	  1	210.0	33.6	 16
 68	  1	516.0	147.5	 16
 69	  1	79.0	15.0	 16
 70	  1	104.3	16.2	 16
 71	  1	491.8	151.0	 16
 72	  1	201.3	47.0	 16
 73	  1	728.0	195.8	 16
 74	  1	750.3	245.8	 16
 75	  1	85.0	15.5	 16
 76	  1	303.8	92.7	 16
 77	  1	103.3	13.6	 16
 78	  1	229.0	61.9	 16
 79	  1	81.8	16.6	 16
 80	  1	291.0	79.8	 16
 81	  1	101.0	19.9	 16
 82	  1	270.0	55.6	 16
 83	  1	145.3	17.8	 16
 84	  1	114.8	25.0	 16
 85	  1	78.3	12.3	 16
 86	  1	82.8	15.9	 16
 87	  1	719.3	142.0	 16
 88	  1	152.5	35.1	 16
 89	  1	508.5	103.3	 16
 90	  1	219.8	44.0	 16
 91	  1	308.8	75.9	 16
 92	  1	81.0	11.9	 16
 93	  1	165.5	30.0	 16
 94	  1	250.0	32.7	 16
 95	  1	210.0	21.4	 16
 96	  1	67.5	15.5	 16
 97	  1	648.3	137.9	 16
 98	  1	97.5	24.9	 16
 99	  1	212.8	29.9	 16
100	  1	986.8	166.4	 16
101	  1	73.0	11.7	 16
102	  1	76.0	18.7	 16
103	  1	368.5	56.3	 16
104	  1	105.8	17.6	 16
105	  1	197.0	30.6	 16
106	  1	195.5	36.4	 16
107	  1	186.0	32.7	 16
108	  1	94.3	11.0	 16
109	  1	65.0	13.6	 16
110	  1	93.5	18.4	 16
111	  1	428.8	53.4	 16
112	  1	222.3	25.7	 16
113	  1	153.0	27.3	 16
114	  1	250.3	24.9	 16
115	  1	77.3	14.9	 16
116	  1	127.8	21.0	 16
117	  1	185.0	22.6	 16
118	  1	78.0	12.8	 16
119	  1	189.0	22.6	 16
120	  1	850.0	116.0	 16
121	  1	124.8	27.3	 16
122	  1	492.5	85.8	 16
123	  1	128.3	19.7	 16
124	  1	102.3	8.2	 16
125	  1	103.5	15.1	 16
126	  1	133.8	16.8	 16
127	  1	184.5	35.2	 16
128	  1	266.3	33.9	 16
129	  1	72.3	12.5	 16
130	  1	150.0	21.7	 16
131	  1	130.3	20.6	 16
132	  1	137.3	18.4	 16
133	  1	167.5	22.2	 16
134	  1	193.5	24.6	 16
135	  1	131.8	20.3	 16
136	  1	126.5	19.4	 16
137	  1	76.0	17.4	 16
138	  1	104.3	14.9	 16
139	  1	92.0	13.0	 16
140	  1	110.3	16.8	 16
141	  1	79.3	12.2	 16
142	  1	224.0	37.0	 16
143	  1	155.5	22.8	 16
144	  1	363.8	35.9	 16
145	  1	959.0	191.8	 16
146	  1	336.0	63.6	 16
147	  1	79.0	13.3	 16
148	  1	1337.0	285.8	 16
149	  1	105.8	12.5	 16
150	  1	99.5	15.8	 16
151	  1	108.5	20.4	 16
152	  1	257.0	38.9	 16
153	  1	162.8	21.6	 16
154	  1	69.3	10.8	 16
155	  1	65.3	12.9	 16
156	  1	1323.3	215.0	 16
157	  1	411.8	52.3	 16
158	  1	84.5	6.8	 16
159	  1	112.5	12.8	 16
160	  1	138.5	27.4	 16
161	  1	714.8	88.4	 16
162	  1	233.0	32.9	 16
163	  1	490.8	58.2	 16
164	  1	690.3	67.8	 16
165	  1	148.3	13.4	 16
166	  1	175.0	24.1	 16
167	  1	399.0	39.6	 16
168	  1	164.0	16.6	 16
169	  1	75.0	13.5	 16
170	  1	187.8	22.8	 16
171	  1	95.8	17.0	 16
172	  1	414.5	42.8	 16
173	  1	95.5	15.0	 16
174	  1	89.3	17.2	 16
175	  1	2953.8	201.2	 16
176	  1	172.5	23.1	 16
177	  1	359.0	50.1	 16
178	  1	143.8	21.4	 16
179	  1	144.0	29.1	 20
180	  1	147.3	21.8	 16
181	  1	187.5	28.6	 16
182	  1	75.8	13.3	 16
183	  1	322.3	75.8	 16
184	  1	145.8	38.0	 16
185	  1	95.5	16.1	 16
186	  1	140.3	15.9	 16
187	  1	217.5	42.3	 16
188	  1	142.8	34.2	 16
189	  1	1236.8	393.8	 16
190	  1	93.5	14.7	 16
191	  1	160.5	60.2	 16
192	  1	253.3	38.6	 16
193	  1	194.5	26.7	 16
194	  1	155.3	53.7	 16
195	  1	206.3	38.0	 16
196	  1	146.0	18.7	 16
197	  1	133.0	19.1	 16
198	  1	142.8	32.0	 16
199	  1	177.3	32.9	 16
200	  1	205.0	35.7	 16
201	  1	102.0	15.3	 16
202	  1	648.3	90.6	 16
203	  1	168.5	27.3	 16
204	  1	67.5	13.1	 16
205	  1	136.5	17.7	 16
206	  1	440.3	78.1	 16
207	  1	122.8	22.3	 16
208	  1	80.0	14.2	 16
209	  1	120.3	24.6	 16
210	  1	84.3	12.6	 16
211	  1	708.5	153.0	 16
212	  1	100.5	22.5	 16
213	  1	100.0	20.0	 16
214	  1	120.0	15.4	 16
215	  1	164.3	20.5	 16
216	  1	84.3	13.2	 16
217	  1	1127.8	220.8	 16
218	  1	258.3	50.4	 16
219	  1	129.5	20.2	 16
220	  1	80.0	11.2	 16
221	  1	313.3	43.5	 16
222	  1	91.3	12.7	 16
223	  1	1116.3	201.3	 16
224	  1	79.8	18.8	 16
225	  1	71.5	11.6	 16
226	  1	258.8	38.5	 16
227	  1	163.8	30.8	 16
228	  1	562.8	97.6	 16
229	  1	521.5	89.5	 16
230	  1	386.3	54.6	 16
231	  1	194.8	35.3	 16
232	  1	93.8	19.0	 16
233	  1	105.8	11.5	 16
234	  1	143.0	20.1	 16
235	  1	51.0	8.7	 16
236	  1	693.8	110.3	 16
237	  1	44.5	6.2	 16
238	  1	70.0	12.6	 16
239	  1	44.8	8.3	 16
240	  1	229.8	34.8	 16
241	  1	129.0	18.0	 16
242	  1	77.0	10.9	 16
243	  1	184.3	27.9	 16
244	  1	193.3	28.2	 16
245	  1	155.5	20.8	 16
246	  1	176.5	24.9	 16
247	  1	166.5	27.6	 16
248	  1	72.5	17.7	 16
249	  1	106.3	14.9	 16
250	  1	96.3	18.6	 16
251	  1	74.3	14.1	 16
252	  1	61.3	11.4	 16
253	  1	323.0	51.9	 16
254	  1	54.5	9.4	 16
255	  1	69.5	12.5	 16
256	  1	519.3	80.1	 16
257	  1	75.0	16.0	 16
258	  1	89.8	13.0	 16
259	  1	475.3	47.4	 16
260	  1	93.3	15.2	 16
261	  1	245.3	20.7	 16
262	  1	96.5	21.0	 16
263	  1	133.5	27.1	 16
264	  1	171.0	27.0	 16
265	  1	477.5	60.6	 16
266	  1	68.0	10.8	 16
267	  1	132.3	17.9	 16
268	  1	200.5	21.3	 16
269	  1	75.0	12.3	 16
270	  1	77.3	16.1	 16
271	  1	73.0	10.1	 16
272	  1	84.0	15.8	 16
273	  1	1383.5	172.0	 16
274	  1	83.8	13.2	 16
275	  1	160.0	20.4	 16
276	  1	2207.0	234.9	 16
277	  1	118.0	21.9	 16
278	  1	99.5	16.5	 16
279	  1	234.5	31.4	 16
280	  1	75.0	11.7	 16
281	  1	204.5	28.5	 16
282	  1	252.5	31.9	 16
283	  1	223.5	30.8	 16
284	  1	77.0	14.7	 16
285	  1	157.5	22.3	 16
286	  1	161.3	28.1	 16
287	  1	128.3	17.0	 16
288	  1	122.0	10.5	 16
289	  1	211.5	23.4	 16
290	  1	195.0	28.3	 16
291	  1	77.8	15.9	 16
292	  1	340.3	47.1	 16
293	  1	224.5	21.3	 16
294	  1	126.5	22.4	 16
295	  1	102.8	19.3	 16
296	  1	70.0	9.5	 16
297	  1	88.5	15.7	 16
298	  1	189.5	49.3	 20
299	  1	66.5	8.1	 16
300	  1	70.8	13.0	 16
301	  1	66.3	12.2	 16
302	  1	93.3	15.9	 16
303	  1	195.3	44.6	 16
304	  1	67.0	12.9	 16
305	  1	467.8	135.1	 16
306	  1	351.0	120.8	 16
307	  1	74.3	14.7	 16
308	  1	108.8	15.6	 16
309	  1	153.3	34.4	 16
310	  1	162.5	36.5	 16
311	  1	574.5	191.1	 16
312	  1	180.5	32.8	 16
313	  1	105.5	13.4	 16
314	  1	876.0	262.1	 16
315	  1	225.3	58.2	 16
316	  1	85.3	19.2	 16
317	  1	129.8	20.9	 16
318	  1	98.8	21.0	 16
319	  1	151.8	20.9	 16
320	  1	162.3	33.3	 16
321	  1	283.5	82.5	 16
322	  1	91.3	15.6	 16
323	  1	236.0	56.0	 16
324	  1	203.0	51.5	 16
325	  1	63.0	8.8	 16
326	  1	143.5	32.5	 16
327	  1	72.3	13.6	 16
328	  1	141.3	15.3	 16
329	  1	480.3	50.3	 16
330	  1	109.8	16.1	 16
331	  1	173.8	36.8	 16
332	  1	579.5	163.1	 16
333	  1	357.5	83.5	 16
334	  1	112.5	21.1	 16
335	  1	2538.0	685.7	 16
336	  1	123.3	17.1	 16
337	  1	704.5	150.0	 16
338	  1	74.3	11.3	 16
339	  1	70.3	13.1	 16
340	  1	412.8	103.9	 16
341	  1	149.0	26.6	 16
342	  1	193.5	29.3	 16
343	  1	127.3	20.0	 16
344	  1	124.3	26.8	 16
345	  1	492.3	45.2	 16
346	  1	115.3	19.5	 16
347	  1	349.3	48.4	 16
348	  1	366.0	28.1	 16
349	  1	193.5	24.0	 16
350	  1	75.3	13.2	 16
351	  1	61.5	13.1	 16
352	  1	162.5	24.1	 16
353	  1	113.3	21.5	 16
354	  1	8592.3	1285.6	 16
355	  1	1396.5	225.9	 16
356	  1	944.3	145.6	 16
357	  1	71.0	9.5	 16
358	  1	106.3	17.9	 16
359	  1	135.5	13.6	 16
360	  1	92.5	13.9	 16
361	  1	63.8	10.9	 16
362	  1	67.3	10.8	 16
363	  1	80.3	14.8	 16
364	  1	85.3	15.3	 16
365	  1	73.8	14.2	 16
366	  1	209.0	35.4	 16
367	  1	279.0	46.3	 16
368	  1	772.8	141.3	 16
369	  1	85.3	11.3	 16
370	  1	76.0	11.6	 16
371	  1	9517.8	1109.5	 16
372	  1	120.3	18.3	 16
373	  1	1785.5	239.0	 16
374	  1	119.3	17.6	 16
375	  1	138.0	21.8	 16
376	  1	134.3	15.9	 16
377	  1	205.0	31.3	 16
378	  1	454.3	49.5	 16
379	  1	485.8	49.8	 16
380	  1	89.8	16.8	 16
381	  1	215.3	23.6	 16
382	  1	332.0	29.4	 16
383	  1	349.8	30.2	 16
384	  1	502.3	64.6	 16
385	  1	88.5	17.1	 16
386	  1	185.3	25.0	 16
387	  1	83.0	12.9	 16
388	  1	49.3	8.4	 16
389	  1	67.0	9.9	 16
390	  1	188.5	26.9	 16
391	  1	102.5	20.0	 16
392	  1	94.3	19.1	 16
393	  1	50.5	8.7	 16
394	  1	80.5	14.6	 16
395	  1	244.5	37.2	 16
396	  1	344.5	38.9	 16
397	  1	266.0	40.7	 16
398	  1	158.3	19.2	 16
399	  1	165.3	24.8	 16
400	  1	167.5	22.8	 16
401	  1	102.8	19.3	 16
402	  1	273.0	31.2	 16
403	  1	318.3	40.9	 16
404	  1	762.3	56.8	 16
405	  1	1086.8	106.1	 16
406	  1	205.8	31.8	 16
407	  1	133.3	19.7	 16
408	  1	190.3	21.5	 16
409	  1	205.3	29.2	 16
410	  1	134.3	20.9	 16
411	  1	359.0	45.0	 16
412	  1	449.0	32.6	 16
413	  1	182.0	18.9	 16
414	  1	160.0	37.7	 16
415	  1	86.8	12.0	 16
416	  1	81.3	10.3	 16
417	  1	528.3	135.8	 20
418	  1	114.8	17.5	 16
419	  1	125.0	20.1	 16
420	  1	347.0	75.9	 16
421	  1	153.8	19.8	 16
422	  1	214.5	37.2	 16
423	  1	351.8	47.2	 16
424	  1	135.0	18.1	 16
425	  1	117.0	15.8	 16
426	  1	294.8	78.2	 16
427	  1	154.5	40.6	 16
428	  1	76.3	14.2	 16
429	  1	606.3	166.3	 16
430	  1	67.3	13.1	 16
431	  1	202.0	31.3	 16
432	  1	144.5	26.0	 16
433	  1	242.5	41.6	 16
434	  1	326.8	68.2	 16
435	  1	121.0	28.3	 16
436	  1	131.8	139.7	 16
437	  1	61.8	10.6	 16
438	  1	88.0	18.7	 16
439	  1	777.8	223.5	 16
440	  1	70.5	16.1	 16
441	  1	144.8	25.4	 16
442	  1	229.3	44.3	 16
443	  1	85.8	12.8	 16
444	  1	95.3	18.8	 16
445	  1	93.0	13.5	 16
446	  1	94.5	50.8	 16
447	  1	56.0	10.9	 16
448	  1	175.5	38.0	 16
449	  1	86.3	12.0	 16
450	  1	89.3	17.6	 16
451	  1	160.8	31.4	 16
452	  1	449.8	50.3	 16
453	  1	539.5	111.2	 16
454	  1	165.0	30.3	 16
455	  1	91.5	21.2	 16
456	  1	623.8	82.7	 16
457	  1	990.0	123.5	 16
458	  1	121.0	19.2	 16
459	  1	112.8	20.0	 16
460	  1	586.0	92.7	 16
461	  1	181.0	25.8	 16
462	  1	57.8	10.8	 16
463	  1	125.8	20.8	 16
464	  1	224.5	61.2	 16
465	  1	717.3	68.8	 16
466	  1	239.3	33.6	 16
467	  1	329.3	40.7	 16
468	  1	193.5	20.8	 16
469	  1	94.3	16.7	 16
470	  1	299.5	39.3	 16
471	  1	64.0	13.1	 16
472	  1	49.3	11.1	 16
473	  1	1651.3	303.9	 16
474	  1	47.5	7.0	 16
475	  1	61.3	15.1	 16
476	  1	43.0	7.2	 16
477	  1	306.5	46.3	 16
478	  1	337.5	71.8	 16
479	  1	88.5	13.0	 16
480	  1	63.3	8.9	 16
481	  1	76.0	12.7	 16
482	  1	1633.5	328.8	 16
483	  1	188.3	25.6	 16
484	  1	94.8	21.5	 16
485	  1	307.0	54.9	 16
486	  1	69.5	12.0	 16
487	  1	81.5	15.8	 16
488	  1	69.5	12.1	 16
489	  1	105.3	17.3	 16
490	  1	300.3	48.0	 16
491	  1	114.0	18.9	 16
492	  1	70.8	13.8	 16
493	  1	158.0	24.7	 16
494	  1	147.3	22.9	 16
495	  1	174.3	26.3	 16
496	  1	222.5	23.0	 16
497	  1	187.5	37.0	 16
498	  1	76.5	16.0	 16
499	  1	82.3	13.3	 16
500	  1	73.0	10.0	 16
501	  1	198.8	33.3	 16
502	  1	615.0	134.5	 16
503	  1	110.0	16.1	 16
504	  1	117.5	25.3	 16
505	  1	90.3	16.2	 16
506	  1	325.5	33.3	 16
507	  1	126.5	18.8	 16
508	  1	124.3	16.0	 16
509	  1	148.3	18.5	 16
510	  1	535.5	68.5	 16
511	  1	214.3	15.8	 16
512	  1	99.0	13.4	 16
513	  1	2216.0	311.8	 16
514	  1	107.5	24.8	 16
515	  1	367.0	56.3	 16
516	  1	147.5	22.5	 16
517	  1	153.8	21.5	 16
518	  1	931.3	129.3	 16
519	  1	1050.0	143.5	 16
520	  1	242.3	24.9	 16
521	  1	58.0	12.8	 16
522	  1	1862.0	278.1	 16
523	  1	179.0	32.7	 16
524	  1	435.5	34.3	 16
525	  1	471.5	58.7	 16
526	  1	233.3	18.2	 16
527	  1	232.5	141.4	 16
528	  1	94.0	13.8	 16
529	  1	454.0	49.5	 16
530	  1	1916.0	227.9	 16
531	  1	62.5	9.9	 16
532	  1	55.8	12.1	 16
533	  1	101.5	20.8	 16
534	  1	209.5	25.6	 16
535	  1	422.8	49.7	 16
536	  1	73.3	12.0	 20
537	  1	74.3	21.0	 16
538	  1	103.8	24.7	 16
539	  1	92.0	21.4	 16
540	  1	162.5	22.0	 16
541	  1	122.0	28.4	 16
542	  1	1314.0	315.3	 16
543	  1	192.8	16.7	 16
544	  1	234.0	39.7	 16
545	  1	97.0	68.6	 16
546	  1	546.5	113.9	 16
547	  1	560.0	118.4	 16
548	  1	73.8	13.8	 16
549	  1	72.5	18.7	 16
550	  1	615.8	145.5	 16
551	  1	149.5	16.8	 16
552	  1	76.5	14.9	 16
553	  1	289.0	54.1	 16
554	  1	71.8	12.1	 16
555	  1	90.5	14.1	 16
556	  1	92.8	14.7	 16
557	  1	253.0	42.5	 16
558	  1	180.5	22.2	 16
559	  1	1599.0	91.7	 16
560	  1	5651.0	427.5	 16
561	  1	143.3	16.8	 16
562	  1	941.3	141.9	 16
563	  1	120.0	12.5	 16
564	  1	213.3	37.5	 16
565	  1	115.0	22.2	 12
566	  1	378.3	70.6	 16
567	  1	69.0	9.5	 16
568	  1	2074.3	294.3	 16
569	  1	229.5	50.5	 16
570	  1	75.0	14.7	 16
571	  1	64.8	12.0	 16
572	  1	58.3	9.4	 16
573	  1	158.5	29.4	 16
574	  1	68.5	19.5	 16
575	  1	57.3	9.9	 16
576	  1	113.0	16.5	 16
577	  1	140.0	26.4	 16
578	  1	155.8	38.8	 16
579	  1	227.5	29.9	 16
580	  1	209.5	27.7	 16
581	  1	73.3	16.9	 16
582	  1	270.3	30.4	 16
583	  1	312.5	52.3	 16
584	  1	330.3	32.6	 16
585	  1	426.0	60.7	 16
586	  1	162.5	20.1	 16
587	  1	94.0	19.0	 16
588	  1	119.5	27.7	 16
589	  1	186.3	24.4	 16
590	  1	197.3	26.9	 16
591	  1	70.3	13.1	 16
592	  1	852.8	86.6	 16
593	  1	99.5	16.0	 16
594	  1	91.3	12.7	 16
595	  1	81.8	12.6	 16
596	  1	264.3	33.2	 16
597	  1	255.5	31.9	 16
598	  1	259.8	23.9	 16
599	  1	254.3	21.7	 16
600	  1	263.0	28.9	 16
601	  1	213.0	28.1	 16
602	  1	194.8	26.3	 16
603	  1	265.0	27.3	 16
604	  1	1612.8	191.0	 16
605	  1	71.5	13.5	 16
606	  1	215.3	38.0	 16
607	  1	321.8	41.9	 16
608	  1	539.5	46.8	 16
609	  1	9258.0	936.7	 16
610	  1	384.0	35.6	 16
611	  1	939.5	127.2	 16
612	  1	85.0	19.7	 16
613	  1	254.0	48.2	 16
614	  1	85.8	12.2	 16
615	  1	200.0	29.6	 16
616	  1	496.0	83.5	 16
617	  1	431.0	53.1	 16
618	  1	208.0	31.1	 16
619	  1	140.0	23.5	 16
620	  1	160.8	23.8	 16
621	  1	128.3	21.7	 16
622	  1	146.5	23.5	 16
623	  1	252.5	40.0	 16
624	  1	163.5	18.1	 16
625	  1	177.5	16.8	 16
626	  1	713.5	74.2	 16
627	  1	595.5	58.9	 16
628	  1	486.3	40.3	 16
629	  1	170.5	25.7	 16
630	  1	301.5	24.4	 16
631	  1	1934.0	138.9	 16
632	  1	2255.0	137.1	 16
633	  1	2578.5	115.7	 16
634	  1	75.8	12.2	 16
635	  1	77.3	11.3	 16
636	  1	103.0	17.5	 16
637	  1	223.8	25.8	 16
638	  1	90.3	13.5	 16
639	  1	356.0	43.9	 16
640	  1	122.0	12.5	 16
641	  1	254.3	26.4	 16
642	  1	99.5	16.0	 16
643	  1	1288.8	115.1	 16
644	  1	2771.0	238.5	 16
645	  1	81.8	10.5	 16
646	  1	85.8	12.8	 16
647	  1	142.3	22.8	 16
648	  1	94.0	19.0	 16
649	  1	155.3	33.9	 16
650	  1	106.5	18.0	 16
651	  1	56.8	9.3	 16
652	  1	729.3	92.9	 16
653	  1	136.0	35.1	 16
654	  1	103.0	16.6	 20
655	  1	659.8	118.7	 16
656	  1	73.0	11.6	 16
657	  1	382.0	82.1	 16
658	  1	63.8	14.4	 16
659	  1	504.0	111.2	 16
660	  1	104.3	15.1	 16
661	  1	74.5	14.3	 16
662	  1	67.0	13.3	 16
663	  1	609.0	133.7	 16
664	  1	423.0	88.4	 16
665	  1	65.0	9.7	 16
666	  1	100.0	46.8	 16
667	  1	1949.3	210.5	 16
668	  1	294.5	31.9	 16
669	  1	241.5	46.4	 16
670	  1	114.3	17.0	 16
671	  1	97.5	12.4	 16
672	  1	228.3	32.9	 16
673	  1	265.5	41.1	 16
674	  1	212.0	31.7	 16
675	  1	524.0	82.4	 16
676	  1	427.5	67.8	 16
677	  1	105.5	16.8	 16
678	  1	113.0	14.7	 16
679	  1	114.5	20.0	 16
680	  1	3921.3	640.9	 16
681	  1	62.3	9.5	 16
682	  1	431.5	68.4	 16
683	  1	181.8	44.9	 16
684	  1	1279.8	155.9	 16
685	  1	173.8	44.9	 16
686	  1	264.0	37.2	 16
687	  1	1400.5	213.8	 16
688	  1	115.3	26.9	 16
689	  1	694.5	127.0	 16
690	  1	202.5	35.3	 16
691	  1	3655.8	517.6	 16
692	  1	3196.8	373.0	 16
693	  1	94.8	17.9	 16
694	  1	184.5	34.2	 16
695	  1	82.5	15.5	 16
696	  1	76.5	13.3	 16
697	  1	74.0	13.7	 16
698	  1	81.8	17.6	 16
699	  1	172.8	37.1	 16
700	  1	70.3	11.7	 16
701	  1	83.8	15.9	 16
702	  1	193.0	30.7	 16
703	  1	230.3	25.7	 16
704	  1	214.0	23.5	 16
705	  1	155.8	25.1	 16
706	  1	72.3	10.5	 16
707	  1	69.0	14.8	 16
708	  1	9201.0	1096.1	 16
709	  1	115.0	15.4	 16
710	  1	8886.0	1025.1	 16
711	  1	108.8	16.6	 16
  0	  2	114.3	14.2	 16
  1	  2	8706.5	781.0	 16
  2	  2	115.8	17.5	 16
  3	  2	8809.3	909.6	 16
  4	  2	68.3	14.7	 16
  5	  2	270.8	25.5	 16
  6	  2	111.5	13.0	 16
  7	  2	68.8	10.3	 16
  8	  2	151.5	23.8	 16
  9	  2	76.3	13.9	 16
 10	  2	100.3	18.1	 16
 11	  2	127.5	18.4	 16
 12	  2	73.3	12.2	 16
 13	  2	108.3	14.1	 16
 14	  2	215.3	23.7	 16
 15	  2	280.0	17.4	 16
 16	  2	219.5	28.7	 16
 17	  2	97.3	12.4	 16
 18	  2	67.3	10.1	 16
 19	  2	329.3	56.8	 16
 20	  2	87.8	15.9	 16
 21	  2	64.8	10.7	 16
 22	  2	89.0	15.6	 16
 23	  2	101.0	11.8	 16
 24	  2	387.8	41.8	 16
 25	  2	898.5	165.8	 16
 26	  2	83.0	9.5	 16
 27	  2	298.0	40.3	 16
 28	  2	267.3	43.4	 16
 29	  2	196.8	26.1	 16
 30	  2	129.5	20.3	 16
 31	  2	65.3	8.5	 16
 32	  2	162.0	29.1	 16
 33	  2	173.5	45.4	 16
 34	  2	642.0	70.4	 16
 35	  2	242.5	15.0	 16
 36	  2	405.5	57.1	 16
 37	  2	100.5	11.7	 16
 38	  2	119.0	19.5	 16
 39	  2	177.5	36.6	 16
 40	  2	228.3	27.5	 16
 41	  2	119.5	23.2	 16
 42	  2	296.0	45.8	 16
 43	  2	177.5	25.9	 16
 44	  2	83.5	12.7	 16
 45	  2	332.5	63.0	 16
 46	  2	97.8	17.6	 16
 47	  2	314.0	45.0	 16
 48	  2	124.5	19.2	 16
 49	  2	213.5	38.7	 16
 50	  2	160.5	25.1	 16
 51	  2	175.5	18.6	 16
 52	  2	218.5	32.1	 16
 53	  2	63.3	10.6	 16
 54	  2	94.5	21.6	 16
 55	  2	108.3	18.8	 16
 56	  2	209.5	23.7	 16
 57	  2	329.0	47.6	 16
 58	  2	524.8	80.5	 16
 59	  2	72.5	15.5	 16
 60	  2	128.8	16.7	 16
 61	  2	91.8	18.5	 16
 62	  2	89.5	13.9	 20
 63	  2	87.0	18.4	 16
 64	  2	127.5	20.3	 16
 65	  2	171.0	30.9	 16
 66	  2	173.3	42.1	 16
 67	  2	148.3	19.8	 16
 68	  2	242.5	62.7	 16
 69	  2	72.5	13.4	 16
 70	  2	111.8	20.8	 16
 71	  2	128.8	24.1	 16
 72	  2	98.5	20.6	 16
 73	  2	183.5	30.2	 16
 74	  2	174.3	42.1	 16
 75	  2	65.0	10.7	 16
 76	  2	73.3	14.4	 16
 77	  2	97.3	15.6	 16
 78	  2	113.3	26.0	 16
 79	  2	69.3	13.1	 16
 80	  2	66.3	11.8	 16
 81	  2	140.0	18.5	 16
 82	  2	325.5	58.5	 16
 83	  2	131.5	21.4	 16
 84	  2	106.0	20.0	 16
 85	  2	64.5	10.7	 16
 86	  2	71.0	12.8	 16
 87	  2	259.3	43.3	 16
 88	  2	93.0	23.9	 16
 89	  2	407.3	83.4	 16
 90	  2	102.3	13.5	 16
 91	  2	109.3	20.1	 16
 92	  2	78.0	10.1	 16
 93	  2	103.5	18.1	 16
 94	  2	119.5	22.1	 16
 95	  2	199.5	33.2	 16
 96	  2	71.0	11.1	 16
 97	  2	79.3	14.2	 16
 98	  2	106.3	16.3	 16
 99	  2	285.8	30.0	 16
100	  2	354.3	44.6	 16
101	  2	80.3	12.7	 16
102	  2	67.8	20.1	 16
103	  2	89.8	17.5	 16
104	  2	94.8	14.1	 16
105	  2	543.5	85.8	 16
106	  2	90.5	14.3	 16
107	  2	91.5	15.5	 16
108	  2	73.0	13.5	 16
109	  2	58.0	7.5	 16
110	  2	97.5	11.8	 16
111	  2	202.5	26.1	 16
112	  2	197.3	38.3	 16
113	  2	99.0	21.2	 16
114	  2	104.3	14.8	 16
115	  2	86.3	18.7	 16
116	  2	120.8	19.1	 16
117	  2	117.5	19.6	 16
118	  2	88.3	17.7	 16
119	  2	253.0	29.9	 16
120	  2	111.8	15.0	 16
121	  2	104.3	13.2	 16
122	  2	62.8	19.2	 16
123	  2	94.0	14.0	 16
124	  2	95.3	12.5	 16
125	  2	160.0	29.3	 16
126	  2	135.5	22.2	 16
127	  2	290.5	36.3	 16
128	  2	319.0	50.6	 16
129	  2	68.3	15.0	 16
130	  2	213.8	26.4	 16
131	  2	139.3	22.7	 16
132	  2	204.5	21.3	 16
133	  2	239.5	24.9	 16
134	  2	162.0	26.4	 16
135	  2	90.3	23.3	 16
136	  2	101.0	9.4	 16
137	  2	69.3	23.4	 16
138	  2	62.3	13.2	 16
139	  2	78.5	14.6	 16
140	  2	68.5	13.0	 16
141	  2	67.0	10.2	 16
142	  2	322.5	50.5	 16
143	  2	147.3	28.4	 16
144	  2	331.8	56.8	 16
145	  2	105.0	26.6	 16
146	  2	107.3	18.9	 16
147	  2	81.3	11.4	 16
148	  2	325.3	50.2	 16
149	  2	122.5	21.8	 16
150	  2	77.0	11.3	 16
151	  2	109.8	18.3	 16
152	  2	103.3	15.7	 16
153	  2	146.8	40.8	 16
154	  2	68.5	13.3	 16
155	  2	85.3	14.8	 16
156	  2	290.3	63.3	 16
157	  2	246.0	48.2	 16
158	  2	88.0	13.8	 16
159	  2	142.3	22.6	 16
160	  2	273.3	22.0	 16
161	  2	243.5	24.4	 16
162	  2	231.5	72.0	 16
163	  2	247.0	33.6	 16
164	  2	211.8	24.5	 16
165	  2	139.5	16.9	 16
166	  2	192.8	27.2	 16
167	  2	285.3	35.5	 16
168	  2	83.3	14.3	 16
169	  2	73.3	10.0	 16
170	  2	149.0	17.4	 16
171	  2	84.8	16.7	 16
172	  2	120.8	17.3	 16
173	  2	84.8	15.4	 16
174	  2	100.0	19.0	 16
175	  2	626.3	103.7	 16
176	  2	169.3	20.2	 16
177	  2	61.8	17.1	 16
178	  2	173.3	22.5	 16
179	  2	134.3	17.9	 16
180	  2	68.8	10.6	 16
181	  2	76.3	12.2	 20
182	  2	71.8	10.8	 16
183	  2	87.8	15.5	 16
184	  2	89.5	22.2	 16
185	  2	77.8	12.5	 16
186	  2	106.3	16.8	 16
187	  2	133.3	29.8	 16
188	  2	84.3	20.5	 16
189	  2	188.3	38.9	 16
190	  2	167.5	33.4	 16
191	  2	107.3	28.8	 16
192	  2	210.0	24.1	 16
193	  2	603.3	142.6	 16
194	  2	184.3	56.8	 16
195	  2	229.8	28.0	 16
196	  2	122.3	27.0	 16
197	  2	76.3	11.8	 16
198	  2	95.0	11.6	 16
199	  2	176.3	19.6	 16
200	  2	124.3	19.7	 16
201	  2	58.8	11.3	 16
202	  2	209.0	31.7	 16
203	  2	120.5	16.2	 16
204	  2	48.0	7.3	 16
205	  2	95.3	15.7	 16
206	  2	160.3	29.1	 16
207	  2	117.3	29.5	 16
208	  2	55.0	8.1	 16
209	  2	68.0	13.2	 16
210	  2	69.8	9.8	 16
211	  2	70.5	12.0	 16
212	  2	55.5	10.1	 16
213	  2	66.5	11.3	 16
214	  2	130.3	20.4	 16
215	  2	105.0	15.9	 16
216	  2	104.8	29.9	 16
217	  2	388.5	41.9	 16
218	  2	327.8	59.6	 16
219	  2	118.5	21.4	 16
220	  2	70.0	15.4	 16
221	  2	183.3	30.4	 16
222	  2	81.8	12.0	 16
223	  2	172.8	30.8	 16
224	  2	67.3	12.0	 16
225	  2	62.5	13.9	 16
226	  2	106.8	17.9	 16
227	  2	121.5	15.8	 16
228	  2	103.5	15.6	 16
229	  2	73.8	14.8	 16
230	  2	232.5	20.5	 12
231	  2	66.0	10.8	 16
232	  2	67.0	11.1	 16
233	  2	74.3	14.4	 16
234	  2	74.0	14.2	 16
235	  2	37.3	8.1	 16
236	  2	300.0	60.0	 16
237	  2	43.3	13.1	 16
238	  2	64.5	12.7	 16
239	  2	48.0	10.9	 16
240	  2	80.8	14.6	 16
241	  2	94.5	13.1	 16
242	  2	78.8	16.0	 16
243	  2	129.8	28.2	 16
244	  2	175.3	27.3	 16
245	  2	167.3	19.8	 16
246	  2	220.5	35.4	 16
247	  2	202.3	25.4	 16
248	  2	72.5	12.8	 16
249	  2	73.0	16.2	 16
250	  2	87.8	16.3	 16
251	  2	72.0	17.3	 16
252	  2	60.8	12.3	 16
253	  2	77.3	16.7	 16
254	  2	59.3	10.4	 16
255	  2	63.8	11.1	 16
256	  2	148.3	27.4	 16
257	  2	70.0	12.0	 16
258	  2	101.3	15.5	 16
259	  2	90.3	14.4	 16
260	  2	68.0	13.4	 16
261	  2	135.3	31.0	 16
262	  2	73.8	12.3	 16
263	  2	104.3	17.6	 16
264	  2	204.8	28.0	 16
265	  2	103.3	18.9	 16
266	  2	58.5	10.2	 16
267	  2	349.5	31.7	 16
268	  2	328.3	43.6	 16
269	  2	64.8	10.7	 16
270	  2	73.0	11.3	 16
271	  2	61.0	13.0	 16
272	  2	77.3	14.6	 16
273	  2	281.5	50.9	 16
274	  2	84.5	16.6	 16
275	  2	164.3	31.6	 16
276	  2	373.0	62.8	 16
277	  2	88.3	11.3	 16
278	  2	99.3	20.6	 16
279	  2	370.0	47.0	 16
280	  2	78.5	13.4	 16
281	  2	79.3	12.2	 16
282	  2	84.5	19.5	 16
283	  2	187.8	26.8	 16
284	  2	68.3	9.7	 16
285	  2	146.5	20.9	 16
286	  2	150.5	24.8	 16
287	  2	102.3	12.3	 16
288	  2	62.0	10.5	 16
289	  2	146.5	26.7	 16
290	  2	151.8	15.9	 16
291	  2	68.3	14.0	 16
292	  2	577.8	80.9	 16
293	  2	305.0	44.6	 16
294	  2	117.3	19.2	 16
295	  2	104.0	12.2	 16
296	  2	70.3	9.7	 16
297	  2	79.0	16.0	 16
298	  2	150.0	28.0	 16
299	  2	66.0	15.5	 20
300	  2	74.3	14.9	 16
301	  2	58.3	10.2	 16
302	  2	83.3	19.1	 16
303	  2	169.5	51.2	 16
304	  2	57.3	10.3	 16
305	  2	85.3	28.5	 16
306	  2	91.8	15.6	 16
307	  2	63.0	12.0	 16
308	  2	83.3	18.9	 16
309	  2	99.8	15.9	 16
310	  2	75.3	12.5	 16
311	  2	141.0	33.7	 16
312	  2	71.5	38.5	 16
313	  2	112.3	28.8	 16
314	  2	138.5	30.6	 16
315	  2	92.0	19.5	 16
316	  2	83.3	18.8	 16
317	  2	143.3	25.3	 16
318	  2	91.3	17.3	 16
319	  2	134.0	31.8	 16
320	  2	156.0	28.8	 16
321	  2	169.5	35.0	 16
322	  2	78.3	13.1	 16
323	  2	80.0	11.4	 16
324	  2	88.0	12.9	 16
325	  2	66.8	7.0	 16
326	  2	70.5	11.1	 16
327	  2	68.3	8.4	 16
328	  2	127.8	34.1	 16
329	  2	895.0	165.5	 16
330	  2	118.3	20.1	 16
331	  2	137.8	30.0	 16
332	  2	64.3	10.1	 16
333	  2	170.3	38.4	 16
334	  2	155.5	25.4	 16
335	  2	228.0	52.8	 16
336	  2	124.3	21.3	 16
337	  2	125.0	18.0	 16
338	  2	75.3	9.8	 16
339	  2	70.5	16.0	 16
340	  2	60.3	13.3	 16
341	  2	95.3	20.1	 16
342	  2	152.8	23.1	 16
343	  2	124.3	20.4	 16
344	  2	117.5	18.4	 16
345	  2	458.8	58.0	 16
346	  2	117.3	20.6	 16
347	  2	269.5	28.3	 16
348	  2	478.3	32.1	 16
349	  2	452.0	47.7	 16
350	  2	70.3	11.8	 16
351	  2	61.5	9.9	 16
352	  2	180.5	26.4	 16
353	  2	80.0	13.2	 16
354	  2	2713.3	444.1	 16
355	  2	250.0	37.0	 16
356	  2	301.5	44.2	 16
357	  2	129.5	17.7	 16
358	  2	74.8	14.1	 16
359	  2	96.5	13.7	 16
360	  2	70.5	6.4	 16
361	  2	74.0	13.3	 16
362	  2	63.5	16.3	 16
363	  2	70.8	11.8	 16
364	  2	65.0	6.9	 16
365	  2	64.3	13.2	 16
366	  2	64.0	11.4	 16
367	  2	79.3	14.6	 16
368	  2	83.0	16.5	 16
369	  2	70.0	14.1	 16
370	  2	67.8	9.1	 16
371	  2	2708.0	420.5	 16
372	  2	97.0	13.7	 16
373	  2	169.3	30.8	 16
374	  2	105.5	17.2	 16
375	  2	78.8	24.3	 16
376	  2	138.0	20.7	 16
377	  2	64.5	11.7	 16
378	  2	121.3	12.9	 16
379	  2	138.3	23.0	 16
380	  2	84.8	11.5	 16
381	  2	89.5	14.2	 16
382	  2	221.3	33.4	 16
383	  2	223.3	27.9	 16
384	  2	131.0	20.2	 16
385	  2	76.3	12.2	 16
386	  2	55.3	8.5	 16
387	  2	78.0	15.5	 16
388	  2	53.0	13.2	 16
389	  2	54.8	10.0	 16
390	  2	74.3	11.5	 16
391	  2	120.5	46.1	 16
392	  2	82.3	13.8	 16
393	  2	62.3	14.2	 16
394	  2	68.3	11.8	 16
395	  2	173.0	24.2	 16
396	  2	263.3	30.7	 16
397	  2	75.0	15.3	 16
398	  2	159.5	26.6	 16
399	  2	105.8	13.4	 16
400	  2	156.0	35.6	 16
401	  2	75.5	17.6	 16
402	  2	179.5	28.0	 16
403	  2	159.3	26.2	 16
404	  2	666.8	83.2	 16
405	  2	1072.3	137.2	 16
406	  2	176.3	21.4	 16
407	  2	124.3	25.3	 16
408	  2	156.3	25.0	 16
409	  2	78.3	8.9	 16
410	  2	125.5	18.1	 16
411	  2	120.0	16.2	 16
412	  2	383.3	39.8	 16
413	  2	234.0	24.1	 16
414	  2	411.8	40.1	 16
415	  2	96.5	14.8	 16
416	  2	82.5	13.8	 16
417	  2	100.3	14.9	 16
418	  2	153.3	23.9	 20
419	  2	98.5	16.5	 16
420	  2	196.3	38.5	 16
421	  2	124.0	17.4	 16
422	  2	245.3	41.0	 16
423	  2	481.8	83.8	 16
424	  2	69.5	14.0	 16
425	  2	97.0	14.1	 16
426	  2	80.0	14.4	 16
427	  2	63.0	10.2	 16
428	  2	70.3	12.3	 16
429	  2	86.3	15.5	 16
430	  2	56.5	11.0	 16
431	  2	123.8	17.9	 16
432	  2	132.0	13.6	 16
433	  2	202.8	27.8	 16
434	  2	205.5	36.6	 16
435	  2	67.5	13.2	 16
436	  2	55.3	13.0	 16
437	  2	48.0	7.3	 16
438	  2	51.5	8.6	 16
439	  2	104.5	30.6	 16
440	  2	54.3	11.1	 16
441	  2	141.3	24.7	 16
442	  2	109.3	29.5	 16
443	  2	65.5	9.4	 16
444	  2	77.3	14.9	 16
445	  2	103.3	20.9	 16
446	  2	83.0	15.1	 16
447	  2	70.5	17.1	 16
448	  2	54.3	9.4	 16
449	  2	74.0	14.4	 16
450	  2	68.3	15.9	 16
451	  2	146.5	23.2	 16
452	  2	318.5	48.2	 16
453	  2	335.5	44.6	 16
454	  2	189.3	14.3	 16
455	  2	84.0	18.4	 16
456	  2	555.5	60.6	 16
457	  2	946.5	92.7	 16
458	  2	167.0	28.3	 16
459	  2	79.5	14.0	 16
460	  2	379.0	28.0	 16
461	  2	165.8	30.6	 16
462	  2	64.3	15.1	 16
463	  2	70.3	14.6	 16
464	  2	237.0	90.4	 16
465	  2	608.0	77.4	 16
466	  2	170.8	31.8	 16
467	  2	369.5	34.4	 16
468	  2	207.5	65.1	 16
469	  2	87.0	15.0	 16
470	  2	264.8	33.2	 16
471	  2	57.8	8.1	 16
472	  2	42.8	10.0	 16
473	  2	749.3	110.1	 16
474	  2	47.0	9.4	 16
475	  2	67.0	11.4	 16
476	  2	38.3	8.5	 16
477	  2	158.5	24.4	 16
478	  2	94.0	14.8	 16
479	  2	91.3	15.8	 16
480	  2	64.5	9.9	 16
481	  2	66.3	14.2	 16
482	  2	223.3	38.3	 16
483	  2	84.5	15.9	 16
484	  2	121.0	18.4	 16
485	  2	166.8	39.1	 16
486	  2	74.5	18.9	 16
487	  2	66.8	9.6	 16
488	  2	53.0	7.6	 16
489	  2	59.5	12.1	 16
490	  2	110.3	15.4	 16
491	  2	89.8	16.3	 16
492	  2	70.5	12.2	 16
493	  2	211.8	38.3	 16
494	  2	99.8	15.1	 16
495	  2	70.5	14.6	 16
496	  2	123.3	17.2	 16
497	  2	370.5	67.0	 16
498	  2	67.5	13.9	 16
499	  2	75.8	17.1	 16
500	  2	76.0	12.0	 16
501	  2	165.3	23.5	 16
502	  2	199.5	39.7	 16
503	  2	76.3	13.1	 16
504	  2	64.3	11.7	 16
505	  2	67.8	12.6	 16
506	  2	275.0	25.6	 16
507	  2	129.8	19.8	 16
508	  2	119.3	16.3	 16
509	  2	195.5	24.9	 16
510	  2	200.5	30.0	 16
511	  2	211.0	19.2	 16
512	  2	91.3	18.3	 16
513	  2	739.3	116.8	 16
514	  2	105.0	15.9	 16
515	  2	123.8	19.6	 16
516	  2	80.0	15.8	 16
517	  2	118.3	17.3	 16
518	  2	281.0	42.7	 16
519	  2	401.8	50.1	 16
520	  2	119.8	100.7	 16
521	  2	59.8	12.5	 16
522	  2	360.3	47.0	 16
523	  2	90.0	9.4	 16
524	  2	1287.5	247.8	 16
525	  2	315.5	66.8	 16
526	  2	287.5	41.0	 16
527	  2	101.5	20.0	 16
528	  2	109.5	19.8	 16
529	  2	198.0	33.0	 16
530	  2	248.5	49.4	 16
531	  2	66.0	8.2	 16
532	  2	51.3	12.1	 16
533	  2	132.5	28.4	 16
534	  2	159.0	23.1	 16
535	  2	88.0	15.0	 16
536	  2	64.3	13.6	 16
537	  2	94.0	22.6	 20
538	  2	104.8	23.9	 16
539	  2	73.8	13.6	 16
540	  2	94.0	18.8	 16
541	  2	76.0	14.2	 16
542	  2	282.0	57.3	 16
543	  2	504.5	53.2	 16
544	  2	224.5	30.7	 16
545	  2	184.8	22.0	 16
546	  2	113.5	20.0	 16
547	  2	187.0	21.8	 16
548	  2	57.0	10.5	 16
549	  2	63.0	6.3	 16
550	  2	91.0	16.7	 16
551	  2	86.3	10.9	 16
552	  2	74.8	13.9	 16
553	  2	111.5	16.8	 16
554	  2	69.3	14.7	 16
555	  2	72.3	11.0	 16
556	  2	93.0	15.5	 16
557	  2	176.3	21.9	 16
558	  2	144.5	18.1	 16
559	  2	449.0	155.5	 16
560	  2	5447.3	655.6	 16
561	  2	149.5	23.2	 16
562	  2	378.3	49.9	 16
563	  2	93.0	11.9	 16
564	  2	149.3	17.1	 16
565	  2	142.3	20.5	 16
566	  2	152.5	33.0	 16
567	  2	62.0	9.4	 16
568	  2	213.5	38.0	 16
569	  2	114.0	18.7	 16
570	  2	70.8	14.1	 16
571	  2	72.8	11.8	 16
572	  2	54.8	9.7	 16
573	  2	155.8	25.2	 16
574	  2	68.8	13.4	 16
575	  2	56.3	9.5	 16
576	  2	80.3	11.9	 16
577	  2	54.3	9.9	 16
578	  2	109.3	22.6	 16
579	  2	120.3	17.8	 16
580	  2	203.0	22.8	 16
581	  2	105.3	24.2	 16
582	  2	193.3	29.0	 16
583	  2	430.5	53.3	 16
584	  2	148.8	24.8	 16
585	  2	119.8	21.9	 16
586	  2	113.5	23.0	 16
587	  2	104.5	17.2	 16
588	  2	98.5	16.9	 16
589	  2	210.3	29.7	 16
590	  2	159.3	28.2	 16
591	  2	70.0	11.7	 16
592	  2	113.5	12.2	 16
593	  2	73.5	10.1	 16
594	  2	65.8	14.8	 16
595	  2	60.3	11.8	 16
596	  2	205.5	26.1	 16
597	  2	257.0	24.7	 16
598	  2	274.0	25.2	 16
599	  2	263.5	22.7	 16
600	  2	207.0	30.9	 16
601	  2	238.8	24.9	 16
602	  2	146.8	22.5	 16
603	  2	106.8	16.4	 16
604	  2	172.3	22.6	 16
605	  2	80.3	17.6	 16
606	  2	62.0	11.5	 16
607	  2	88.3	10.4	 16
608	  2	155.0	23.3	 16
609	  2	1910.3	432.2	 16
610	  2	176.5	24.1	 16
611	  2	74.5	14.8	 16
612	  2	122.8	23.9	 16
613	  2	63.3	7.3	 16
614	  2	129.3	22.5	 16
615	  2	66.0	13.6	 16
616	  2	86.5	18.5	 16
617	  2	94.8	22.6	 16
618	  2	81.0	17.0	 16
619	  2	55.3	10.3	 16
620	  2	134.3	18.0	 16
621	  2	92.0	16.2	 16
622	  2	130.3	19.8	 16
623	  2	99.5	19.3	 16
624	  2	121.3	24.1	 16
625	  2	99.8	15.3	 16
626	  2	244.8	37.6	 16
627	  2	189.8	32.4	 16
628	  2	1143.5	70.7	 16
629	  2	99.5	13.4	 16
630	  2	111.8	19.1	 16
631	  2	132.3	14.2	 16
632	  2	334.8	35.9	 16
633	  2	345.5	39.7	 16
634	  2	78.3	18.0	 16
635	  2	62.0	10.9	 16
636	  2	99.8	13.2	 16
637	  2	212.5	28.4	 16
638	  2	81.3	13.8	 16
639	  2	85.0	20.4	 16
640	  2	152.5	22.1	 16
641	  2	158.3	19.5	 16
642	  2	91.0	12.3	 16
643	  2	231.0	34.5	 16
644	  2	574.5	57.4	 16
645	  2	72.3	12.4	 16
646	  2	90.8	13.8	 16
647	  2	137.8	14.5	 16
648	  2	71.5	14.7	 16
649	  2	59.3	11.8	 16
650	  2	105.0	19.3	 16
651	  2	63.3	15.1	 16
652	  2	109.3	27.2	 16
653	  2	79.0	14.7	 16
654	  2	72.8	14.0	 16
655	  2	147.3	26.2	 20
656	  2	58.3	9.8	 16
657	  2	223.5	42.9	 16
658	  2	60.3	10.6	 16
659	  2	140.5	23.9	 16
660	  2	77.5	13.6	 16
661	  2	92.3	17.8	 16
662	  2	55.0	7.7	 16
663	  2	106.5	21.6	 16
664	  2	102.3	16.5	 16
665	  2	56.0	6.6	 16
666	  2	77.5	18.5	 16
667	  2	801.5	113.7	 16
668	  2	111.3	14.4	 16
669	  2	98.3	20.3	 16
670	  2	74.8	13.6	 16
671	  2	95.5	14.4	 16
672	  2	147.0	23.8	 16
673	  2	156.0	28.1	 16
674	  2	350.5	50.4	 16
675	  2	136.3	19.4	 16
676	  2	272.0	47.4	 16
677	  2	149.3	20.7	 16
678	  2	125.5	15.9	 16
679	  2	217.8	33.6	 16
680	  2	1052.0	170.4	 16
681	  2	61.3	11.9	 16
682	  2	126.5	31.9	 16
683	  2	145.0	39.1	 16
684	  2	642.3	100.6	 16
685	  2	108.8	23.4	 16
686	  2	456.3	74.1	 16
687	  2	179.0	26.3	 16
688	  2	93.3	16.1	 16
689	  2	118.3	14.9	 16
690	  2	69.0	13.7	 16
691	  2	517.8	97.7	 16
692	  2	937.8	154.7	 16
693	  2	68.5	15.2	 16
694	  2	74.0	9.4	 16
695	  2	80.3	15.4	 16
696	  2	63.5	8.7	 16
697	  2	87.0	13.2	 16
698	  2	80.5	17.7	 16
699	  2	63.5	12.1	 16
700	  2	60.0	12.5	 16
701	  2	68.3	16.1	 16
702	  2	324.5	47.2	 16
703	  2	197.0	23.0	 16
704	  2	235.0	32.3	 16
705	  2	173.8	20.5	 16
706	  2	76.5	13.4	 16
707	  2	61.3	10.8	 16
708	  2	116.0	19.5	 16
709	  2	8774.0	943.8	 16
710	  2	105.3	12.9	 16
711	  2	8762.3	848.2	 16
  0	  3	9452.0	1093.4	 16
  1	  3	97.5	15.8	 16
  2	  3	8981.5	937.6	 16
  3	  3	108.0	16.5	 16
  4	  3	55.8	10.8	 16
  5	  3	161.3	21.7	 16
  6	  3	79.5	6.9	 16
  7	  3	253.8	28.2	 16
  8	  3	71.0	13.4	 16
  9	  3	378.3	48.2	 16
 10	  3	320.5	55.6	 16
 11	  3	604.8	88.5	 16
 12	  3	151.0	19.7	 16
 13	  3	182.3	18.3	 16
 14	  3	210.8	33.3	 16
 15	  3	150.5	30.0	 16
 16	  3	540.8	75.8	 16
 17	  3	573.3	73.4	 16
 18	  3	700.0	102.0	 16
 19	  3	188.3	26.3	 16
 20	  3	106.8	16.4	 16
 21	  3	86.0	13.7	 16
 22	  3	155.0	24.6	 16
 23	  3	4297.8	833.2	 16
 24	  3	86.3	12.5	 16
 25	  3	154.8	26.7	 16
 26	  3	141.5	22.6	 16
 27	  3	136.5	24.3	 16
 28	  3	131.0	15.4	 16
 29	  3	127.3	22.2	 16
 30	  3	128.5	17.0	 16
 31	  3	172.3	25.2	 16
 32	  3	94.5	13.4	 16
 33	  3	475.5	65.8	 16
 34	  3	254.5	34.5	 16
 35	  3	268.8	22.8	 16
 36	  3	330.5	35.3	 16
 37	  3	1325.8	252.8	 16
 38	  3	178.5	23.6	 16
 39	  3	92.5	14.4	 16
 40	  3	180.3	19.0	 16
 41	  3	987.5	83.1	 16
 42	  3	1033.0	195.9	 16
 43	  3	106.8	18.7	 16
 44	  3	242.5	36.8	 16
 45	  3	93.0	14.6	 16
 46	  3	151.3	19.4	 16
 47	  3	648.3	103.1	 16
 48	  3	73.8	11.4	 16
 49	  3	102.3	18.0	 16
 50	  3	97.3	12.7	 16
 51	  3	244.3	34.7	 16
 52	  3	631.0	112.8	 16
 53	  3	82.8	13.0	 16
 54	  3	91.0	13.5	 16
 55	  3	184.8	27.4	 16
 56	  3	280.0	29.7	 16
 57	  3	361.8	53.9	 16
 58	  3	116.3	27.5	 16
 59	  3	246.8	34.6	 16
 60	  3	96.0	16.5	 16
 61	  3	209.5	22.0	 16
 62	  3	803.8	147.4	 16
 63	  3	295.8	208.7	 20
 64	  3	6403.0	2314.1	 16
 65	  3	149.3	23.3	 16
 66	  3	115.5	14.3	 16
 67	  3	256.8	58.4	 16
 68	  3	80.3	12.8	 16
 69	  3	106.5	25.8	 16
 70	  3	278.0	42.7	 16
 71	  3	186.0	33.8	 16
 72	  3	201.8	47.9	 16
 73	  3	893.0	194.9	 16
 74	  3	142.8	31.9	 16
 75	  3	89.5	16.3	 16
 76	  3	84.5	15.0	 16
 77	  3	102.8	20.3	 16
 78	  3	204.3	27.6	 16
 79	  3	278.5	70.6	 16
 80	  3	84.0	13.4	 16
 81	  3	105.5	29.1	 16
 82	  3	95.8	24.0	 16
 83	  3	661.3	157.8	 16
 84	  3	279.0	62.0	 16
 85	  3	167.8	30.2	 16
 86	  3	94.3	15.4	 16
 87	  3	130.8	19.2	 16
 88	  3	309.3	47.1	 16
 89	  3	240.0	25.6	 16
 90	  3	148.3	19.8	 16
 91	  3	865.0	85.4	 16
 92	  3	891.3	68.5	 16
 93	  3	928.5	111.6	 16
 94	  3	991.0	130.9	 16
 95	  3	991.3	148.7	 16
 96	  3	636.3	102.6	 16
 97	  3	410.0	50.8	 16
 98	  3	368.8	65.6	 16
 99	  3	73.3	13.8	 16
100	  3	131.3	17.0	 16
101	  3	261.8	26.4	 16
102	  3	83.3	11.3	 16
103	  3	686.3	98.3	 16
104	  3	133.0	24.2	 16
105	  3	98.0	8.6	 16
106	  3	113.8	17.3	 16
107	  3	297.8	43.1	 16
108	  3	98.5	15.5	 16
109	  3	188.3	33.8	 16
110	  3	157.3	27.2	 16
111	  3	197.0	23.5	 16
112	  3	162.0	19.2	 16
113	  3	487.3	73.7	 16
114	  3	138.3	23.7	 16
115	  3	150.8	22.0	 16
116	  3	194.5	21.0	 16
117	  3	149.0	20.8	 16
118	  3	204.8	26.3	 16
119	  3	321.8	37.4	 16
120	  3	134.5	21.0	 16
121	  3	408.5	71.4	 16
122	  3	77.5	10.3	 16
123	  3	57.5	11.4	 16
124	  3	66.0	12.9	 16
125	  3	82.5	15.8	 16
126	  3	120.3	11.2	 16
127	  3	74.0	10.5	 16
128	  3	71.0	11.9	 16
129	  3	79.5	11.4	 16
130	  3	646.5	120.0	 16
131	  3	250.5	27.4	 16
132	  3	503.8	73.7	 16
133	  3	201.3	27.8	 16
134	  3	290.0	42.7	 16
135	  3	321.8	47.0	 16
136	  3	1971.5	429.5	 16
137	  3	108.5	19.1	 16
138	  3	464.0	27.1	 16
139	  3	1405.8	292.2	 16
140	  3	106.0	22.1	 16
141	  3	120.5	18.2	 16
142	  3	1434.5	266.5	 16
143	  3	481.5	117.7	 16
144	  3	58.8	10.4	 16
145	  3	82.3	15.2	 16
146	  3	5719.5	1250.4	 16
147	  3	895.8	168.8	 16
148	  3	238.3	41.2	 16
149	  3	186.8	28.3	 16
150	  3	75.8	11.5	 16
151	  3	432.3	68.7	 16
152	  3	479.0	76.2	 16
153	  3	193.8	35.0	 16
154	  3	74.0	13.2	 16
155	  3	1660.5	239.1	 16
156	  3	92.8	18.1	 16
157	  3	111.5	19.8	 16
158	  3	82.5	14.4	 16
159	  3	434.8	57.5	 16
160	  3	196.3	35.4	 16
161	  3	384.3	37.5	 16
162	  3	5499.3	547.6	 16
163	  3	890.0	88.8	 16
164	  3	277.0	26.0	 16
165	  3	265.8	31.1	 16
166	  3	151.5	24.8	 16
167	  3	227.8	32.6	 16
168	  3	1156.8	95.8	 16
169	  3	95.3	16.8	 16
170	  3	85.5	12.9	 16
171	  3	59.3	8.6	 16
172	  3	245.8	34.7	 16
173	  3	58.5	9.4	 16
174	  3	127.5	18.0	 16
175	  3	50.3	9.0	 16
176	  3	2499.5	208.2	 16
177	  3	72.3	13.8	 16
178	  3	63.8	11.4	 16
179	  3	176.8	28.4	 16
180	  3	219.5	43.6	 16
181	  3	58.0	8.9	 16
182	  3	90.0	18.0	 20
183	  3	102.5	20.6	 16
184	  3	134.3	25.6	 16
185	  3	150.5	36.4	 16
186	  3	65.0	12.1	 16
187	  3	58.5	11.3	 16
188	  3	87.0	15.8	 16
189	  3	156.3	33.4	 16
190	  3	134.8	19.6	 16
191	  3	251.5	53.9	 16
192	  3	613.3	174.2	 16
193	  3	204.8	37.8	 16
194	  3	249.3	47.2	 16
195	  3	758.8	225.6	 16
196	  3	170.3	24.6	 16
197	  3	154.5	31.6	 16
198	  3	137.5	23.4	 16
199	  3	184.3	44.1	 16
200	  3	119.8	15.4	 16
201	  3	677.0	152.3	 16
202	  3	2518.0	546.6	 16
203	  3	84.3	23.0	 16
204	  3	123.5	24.5	 16
205	  3	72.3	9.5	 16
206	  3	88.3	19.7	 16
207	  3	452.0	90.2	 16
208	  3	53.0	9.8	 16
209	  3	89.3	15.1	 16
210	  3	78.8	12.6	 16
211	  3	68.3	12.7	 16
212	  3	85.8	15.4	 16
213	  3	65.0	8.5	 16
214	  3	64.8	12.1	 16
215	  3	389.3	64.6	 16
216	  3	70.3	12.9	 16
217	  3	161.8	19.5	 16
218	  3	100.0	11.8	 16
219	  3	130.0	19.3	 16
220	  3	192.8	30.2	 16
221	  3	409.3	85.8	 16
222	  3	72.0	10.6	 16
223	  3	283.8	56.5	 16
224	  3	58.8	7.4	 16
225	  3	100.5	20.4	 16
226	  3	290.3	61.0	 16
227	  3	73.8	11.9	 16
228	  3	88.0	16.3	 16
229	  3	90.5	15.8	 16
230	  3	1370.3	299.2	 16
231	  3	418.8	72.5	 16
232	  3	81.3	15.0	 16
233	  3	174.8	38.9	 16
234	  3	65.8	9.6	 16
235	  3	46.0	11.5	 16
236	  3	42.0	7.9	 16
237	  3	43.0	8.6	 16
238	  3	42.3	10.5	 16
239	  3	47.3	10.9	 16
240	  3	159.3	22.2	 16
241	  3	228.3	38.8	 16
242	  3	82.3	15.5	 16
243	  3	369.3	56.5	 16
244	  3	96.8	16.7	 16
245	  3	108.8	17.0	 16
246	  3	169.5	23.4	 16
247	  3	83.3	15.7	 16
248	  3	61.3	17.9	 16
249	  3	72.5	11.8	 16
250	  3	172.3	21.7	 16
251	  3	99.5	15.9	 16
252	  3	266.3	43.7	 16
253	  3	105.0	23.1	 16
254	  3	122.3	30.7	 16
255	  3	409.8	62.6	 16
256	  3	123.0	16.9	 16
257	  3	108.5	16.0	 16
258	  3	708.3	95.4	 16
259	  3	322.8	45.9	 16
260	  3	60.5	16.4	 16
261	  3	73.0	21.7	 16
262	  3	53.3	6.1	 16
263	  3	132.3	20.0	 16
264	  3	456.3	30.4	 16
265	  3	334.8	57.0	 16
266	  3	258.0	38.3	 16
267	  3	213.0	39.7	 16
268	  3	77.8	14.9	 16
269	  3	406.3	84.9	 16
270	  3	591.5	86.2	 16
271	  3	127.0	20.4	 16
272	  3	116.5	24.0	 16
273	  3	513.5	68.2	 16
274	  3	1007.5	93.9	 16
275	  3	244.8	26.9	 16
276	  3	132.5	15.3	 16
277	  3	230.8	28.1	 16
278	  3	156.5	25.0	 16
279	  3	163.3	15.4	 16
280	  3	133.8	20.2	 16
281	  3	73.8	11.8	 16
282	  3	350.0	37.1	 16
283	  3	141.8	21.2	 16
284	  3	126.5	16.1	 16
285	  3	181.3	26.0	 16
286	  3	113.5	14.4	 16
287	  3	117.5	17.0	 16
288	  3	164.8	13.8	 16
289	  3	81.0	11.3	 16
290	  3	129.8	26.8	 16
291	  3	61.3	11.1	 16
292	  3	300.3	41.2	 16
293	  3	1810.5	709.1	 16
294	  3	246.3	36.6	 16
295	  3	95.5	18.1	 16
296	  3	318.8	40.9	 16
297	  3	2309.3	338.9	 16
298	  3	914.8	77.3	 16
299	  3	1006.5	86.5	 16
300	  3	408.0	47.4	 16
301	  3	88.3	15.8	 20
302	  3	115.3	20.9	 16
303	  3	69.8	28.0	 16
304	  3	113.3	28.7	 16
305	  3	57.3	11.0	 16
306	  3	75.5	16.0	 16
307	  3	154.8	47.5	 16
308	  3	146.5	87.6	 16
309	  3	3759.8	346.6	 16
310	  3	3994.3	1348.2	 16
311	  3	207.5	36.6	 16
312	  3	261.5	26.3	 16
313	  3	273.8	63.4	 16
314	  3	159.3	22.4	 16
315	  3	1422.3	453.5	 16
316	  3	1404.8	481.1	 16
317	  3	481.8	169.2	 16
318	  3	277.0	112.0	 16
319	  3	90.3	13.2	 16
320	  3	319.8	93.4	 16
321	  3	218.0	42.4	 16
322	  3	146.3	33.3	 16
323	  3	255.5	49.6	 16
324	  3	181.5	25.2	 16
325	  3	141.0	26.6	 16
326	  3	1625.0	559.8	 16
327	  3	77.8	15.2	 16
328	  3	135.3	21.7	 16
329	  3	1147.8	319.3	 16
330	  3	68.3	9.8	 16
331	  3	89.5	17.8	 16
332	  3	60.8	12.5	 16
333	  3	83.3	14.6	 16
334	  3	92.0	16.0	 16
335	  3	60.3	12.1	 16
336	  3	67.3	13.6	 16
337	  3	62.5	8.3	 16
338	  3	68.8	13.9	 16
339	  3	99.0	14.0	 16
340	  3	70.8	11.5	 16
341	  3	3314.0	726.7	 16
342	  3	104.8	16.5	 16
343	  3	121.0	22.8	 16
344	  3	147.8	18.8	 16
345	  3	206.8	24.8	 16
346	  3	165.0	21.7	 16
347	  3	87.0	18.9	 16
348	  3	1383.8	206.6	 16
349	  3	452.8	64.3	 16
350	  3	73.0	11.9	 16
351	  3	81.5	12.2	 16
352	  3	81.3	16.7	 16
353	  3	77.5	13.6	 16
354	  3	216.3	39.2	 16
355	  3	101.0	12.5	 16
356	  3	79.5	14.1	 16
357	  3	187.0	22.5	 16
358	  3	66.3	11.0	 16
359	  3	129.5	23.4	 16
360	  3	97.3	14.5	 16
361	  3	1804.3	174.1	 16
362	  3	2124.3	133.5	 16
363	  3	2359.5	342.1	 16
364	  3	165.3	19.2	 16
365	  3	241.5	51.3	 16
366	  3	73.3	16.8	 16
367	  3	73.5	12.2	 16
368	  3	118.5	22.4	 16
369	  3	101.0	14.4	 16
370	  3	101.0	14.8	 16
371	  3	795.8	84.8	 16
372	  3	121.3	19.6	 16
373	  3	1497.5	150.0	 16
374	  3	102.0	18.3	 16
375	  3	72.3	7.6	 16
376	  3	242.3	29.4	 16
377	  3	80.3	13.4	 16
378	  3	131.3	15.6	 16
379	  3	126.5	17.4	 16
380	  3	131.0	32.9	 16
381	  3	1517.5	96.3	 16
382	  3	509.0	36.7	 16
383	  3	612.3	49.8	 16
384	  3	96.5	18.9	 16
385	  3	55.0	10.9	 16
386	  3	57.3	9.7	 16
387	  3	238.0	27.3	 16
388	  3	90.3	17.8	 16
389	  3	229.0	29.4	 16
390	  3	223.0	27.6	 16
391	  3	68.8	13.5	 16
392	  3	343.8	48.8	 16
393	  3	96.8	18.1	 16
394	  3	360.8	36.6	 16
395	  3	103.0	19.3	 16
396	  3	1288.0	73.7	 16
397	  3	89.0	11.0	 16
398	  3	81.0	18.6	 16
399	  3	80.3	14.1	 16
400	  3	1488.0	190.4	 16
401	  3	309.0	43.6	 16
402	  3	503.3	73.1	 16
403	  3	93.0	16.0	 16
404	  3	89.0	14.6	 16
405	  3	222.8	23.7	 16
406	  3	125.3	22.6	 16
407	  3	122.8	17.2	 16
408	  3	86.5	13.7	 16
409	  3	116.5	22.7	 16
410	  3	156.3	20.9	 16
411	  3	705.3	54.4	 16
412	  3	233.5	21.3	 16
413	  3	1802.8	1489.1	 16
414	  3	95.3	12.2	 16
415	  3	75.8	11.4	 16
416	  3	134.5	16.8	 16
417	  3	99.0	19.8	 16
418	  3	153.8	21.3	 16
419	  3	110.3	15.3	 20
420	  3	58.3	10.1	 16
421	  3	1625.3	470.2	 16
422	  3	1027.0	316.7	 16
423	  3	114.0	15.4	 16
424	  3	83.3	17.1	 16
425	  3	1880.5	570.9	 16
426	  3	49.5	9.2	 16
427	  3	78.3	15.0	 16
428	  3	74.3	9.3	 16
429	  3	816.0	218.1	 16
430	  3	326.8	52.5	 16
431	  3	74.3	11.8	 16
432	  3	183.5	43.4	 16
433	  3	1251.3	333.2	 16
434	  3	151.8	34.8	 16
435	  3	198.3	49.6	 16
436	  3	75.3	16.8	 16
437	  3	64.0	12.5	 16
438	  3	66.0	18.6	 16
439	  3	118.8	21.5	 16
440	  3	79.0	13.2	 16
441	  3	232.8	49.7	 16
442	  3	962.8	232.0	 16
443	  3	568.3	120.9	 16
444	  3	113.0	18.1	 16
445	  3	92.0	14.6	 16
446	  3	69.8	12.4	 16
447	  3	62.5	8.4	 16
448	  3	274.5	62.8	 16
449	  3	77.8	12.9	 16
450	  3	592.3	126.5	 16
451	  3	61.0	10.7	 16
452	  3	938.8	223.2	 16
453	  3	602.0	80.7	 16
454	  3	1573.3	270.3	 16
455	  3	411.0	35.4	 16
456	  3	711.3	120.7	 16
457	  3	180.0	29.5	 16
458	  3	93.0	15.7	 16
459	  3	294.5	47.1	 16
460	  3	404.5	112.6	 16
461	  3	776.3	121.7	 16
462	  3	104.5	23.5	 16
463	  3	63.3	10.6	 16
464	  3	1344.3	66.1	 16
465	  3	4882.8	210.2	 16
466	  3	5014.5	137.0	 16
467	  3	5166.3	913.4	 16
468	  3	161.3	24.9	 16
469	  3	178.0	37.5	 16
470	  3	634.8	114.5	 16
471	  3	66.8	12.0	 16
472	  3	42.5	12.2	 16
473	  3	38.0	7.2	 16
474	  3	41.0	7.4	 16
475	  3	43.0	8.1	 16
476	  3	47.0	8.9	 16
477	  3	232.5	34.0	 16
478	  3	333.5	69.5	 16
479	  3	92.0	11.9	 16
480	  3	114.3	24.6	 16
481	  3	85.0	15.9	 16
482	  3	116.5	17.1	 16
483	  3	420.3	63.9	 16
484	  3	111.5	16.8	 16
485	  3	241.0	40.5	 16
486	  3	137.3	24.1	 16
487	  3	110.5	17.7	 16
488	  3	135.0	23.1	 16
489	  3	51.0	10.6	 16
490	  3	66.8	9.6	 16
491	  3	388.3	82.8	 16
492	  3	112.8	17.6	 16
493	  3	127.3	23.0	 16
494	  3	84.8	12.6	 16
495	  3	1255.0	241.4	 16
496	  3	424.3	63.6	 16
497	  3	392.3	57.5	 16
498	  3	104.5	13.9	 16
499	  3	80.0	19.4	 16
500	  3	269.0	53.1	 16
501	  3	188.0	29.4	 16
502	  3	875.5	155.4	 16
503	  3	75.0	13.7	 16
504	  3	65.3	15.5	 16
505	  3	6481.0	1293.7	 16
506	  3	289.0	24.8	 16
507	  3	182.3	23.5	 16
508	  3	101.3	14.8	 16
509	  3	154.5	25.0	 16
510	  3	268.0	25.8	 16
511	  3	148.5	27.4	 16
512	  3	1208.0	157.3	 16
513	  3	78.0	14.8	 16
514	  3	62.3	10.8	 16
515	  3	62.8	11.1	 16
516	  3	567.0	72.2	 16
517	  3	458.8	52.6	 16
518	  3	113.0	18.1	 16
519	  3	368.0	57.4	 16
520	  3	90.3	18.6	 16
521	  3	126.0	18.8	 16
522	  3	462.0	57.1	 16
523	  3	404.3	48.2	 16
524	  3	957.8	136.2	 16
525	  3	66.0	12.8	 16
526	  3	79.3	13.2	 16
527	  3	162.0	23.0	 16
528	  3	85.5	14.9	 16
529	  3	254.0	36.0	 16
530	  3	75.3	12.3	 16
531	  3	82.3	13.6	 16
532	  3	135.3	14.8	 16
533	  3	91.3	17.7	 16
534	  3	410.0	51.5	 16
535	  3	239.8	28.8	 16
536	  3	253.0	23.4	 16
537	  3	128.8	23.1	 16
538	  3	117.0	17.9	 20
539	  3	724.0	186.6	 16
540	  3	76.5	12.7	 16
541	  3	277.3	58.4	 16
542	  3	231.5	23.0	 16
543	  3	226.5	20.0	 16
544	  3	544.8	117.3	 16
545	  3	793.8	151.5	 16
546	  3	255.0	52.4	 16
547	  3	230.5	41.2	 16
548	  3	659.3	125.0	 16
549	  3	168.0	36.1	 16
550	  3	74.0	9.4	 16
551	  3	221.8	40.5	 16
552	  3	1077.3	277.5	 16
553	  3	87.8	15.4	 16
554	  3	3558.8	750.3	 16
555	  3	66.3	13.5	 16
556	  3	226.8	42.8	 16
557	  3	191.8	34.1	 16
558	  3	1748.8	346.4	 16
559	  3	216.3	32.5	 16
560	  3	3009.8	532.1	 16
561	  3	903.8	86.0	 16
562	  3	319.3	28.8	 16
563	  3	203.8	32.1	 16
564	  3	701.5	95.5	 16
565	  3	209.0	40.1	 16
566	  3	1279.3	169.4	 16
567	  3	57.3	12.5	 16
568	  3	119.3	16.4	 16
569	  3	341.3	55.4	 16
570	  3	59.8	11.9	 16
571	  3	60.3	13.0	 16
572	  3	1068.0	140.6	 16
573	  3	123.5	17.3	 16
574	  3	111.8	20.3	 16
575	  3	263.5	26.2	 16
576	  3	262.8	40.8	 16
577	  3	513.3	47.1	 16
578	  3	71.3	15.4	 16
579	  3	103.8	14.3	 16
580	  3	104.0	13.5	 16
581	  3	182.3	26.7	 16
582	  3	105.3	19.5	 16
583	  3	222.5	25.8	 16
584	  3	214.0	24.4	 16
585	  3	147.3	15.2	 16
586	  3	200.3	36.6	 16
587	  3	154.3	25.1	 16
588	  3	122.0	23.7	 16
589	  3	179.5	30.6	 16
590	  3	306.5	40.2	 16
591	  3	106.3	18.9	 16
592	  3	262.5	29.3	 16
593	  3	575.3	74.0	 16
594	  3	80.0	13.4	 16
595	  3	294.3	34.9	 16
596	  3	326.8	49.8	 16
597	  3	329.5	45.3	 16
598	  3	115.0	16.4	 16
599	  3	182.8	32.3	 16
600	  3	353.0	32.2	 16
601	  3	283.5	37.8	 16
602	  3	462.0	43.1	 16
603	  3	641.8	61.4	 16
604	  3	202.0	35.8	 16
605	  3	1771.3	256.8	 16
606	  3	124.3	21.5	 16
607	  3	416.3	42.9	 12
608	  3	418.8	35.3	 16
609	  3	302.0	41.3	 16
610	  3	604.8	82.3	 16
611	  3	334.8	44.3	 16
612	  3	600.8	71.2	 16
613	  3	56.3	11.7	 16
614	  3	511.0	57.6	 16
615	  3	68.0	12.5	 16
616	  3	160.5	19.0	 16
617	  3	220.0	22.8	 16
618	  3	132.5	18.7	 16
619	  3	96.0	19.5	 16
620	  3	3259.0	286.1	 16
621	  3	259.0	32.9	 16
622	  3	69.3	12.2	 16
623	  3	69.5	12.8	 16
624	  3	55.8	11.9	 16
625	  3	116.5	19.3	 16
626	  3	233.0	20.7	 16
627	  3	2306.3	175.8	 16
628	  3	624.0	49.1	 16
629	  3	486.8	58.9	 16
630	  3	216.0	27.0	 16
631	  3	1845.5	120.6	 16
632	  3	72.0	14.5	 16
633	  3	151.0	27.6	 16
634	  3	216.5	36.3	 16
635	  3	242.3	31.6	 16
636	  3	286.3	32.2	 16
637	  3	1496.0	117.9	 16
638	  3	72.0	10.5	 16
639	  3	582.0	78.4	 16
640	  3	916.3	124.2	 16
641	  3	75.8	11.7	 16
642	  3	71.3	13.0	 16
643	  3	93.5	17.8	 16
644	  3	277.5	33.8	 16
645	  3	1006.5	102.2	 16
646	  3	3539.5	450.2	 16
647	  3	54.0	11.4	 16
648	  3	162.3	30.9	 16
649	  3	74.3	10.9	 16
650	  3	52.3	8.0	 16
651	  3	102.3	19.2	 16
652	  3	70.5	11.9	 16
653	  3	100.8	21.0	 16
654	  3	49.3	7.6	 16
655	  3	112.3	17.8	 16
656	  3	123.3	15.4	 16
657	  3	68.0	12.6	 20
658	  3	63.3	12.0	 16
659	  3	55.8	16.0	 16
660	  3	282.3	52.6	 16
661	  3	592.3	96.8	 16
662	  3	216.8	23.9	 16
663	  3	653.8	117.8	 16
664	  3	72.0	13.0	 16
665	  3	232.3	37.1	 16
666	  3	1243.3	248.2	 16
667	  3	89.8	17.1	 16
668	  3	151.0	21.0	 16
669	  3	112.3	20.2	 16
670	  3	77.0	40.9	 16
671	  3	989.3	166.6	 16
672	  3	182.5	35.1	 16
673	  3	1673.5	237.1	 16
674	  3	221.0	72.0	 16
675	  3	169.8	23.4	 16
676	  3	259.5	49.2	 16
677	  3	238.5	33.6	 16
678	  3	52.5	8.7	 16
679	  3	60.0	11.5	 16
680	  3	128.3	20.9	 16
681	  3	66.0	14.7	 16
682	  3	408.3	79.4	 16
683	  3	136.0	25.5	 16
684	  3	111.5	19.9	 16
685	  3	142.0	17.8	 16
686	  3	304.0	52.4	 16
687	  3	91.5	16.4	 16
688	  3	116.8	19.5	 16
689	  3	389.0	59.9	 16
690	  3	2229.0	340.9	 16
691	  3	224.5	32.9	 16
692	  3	750.0	82.6	 16
693	  3	123.0	23.8	 16
694	  3	229.3	36.9	 16
695	  3	301.0	35.4	 16
696	  3	827.3	95.9	 16
697	  3	138.3	21.5	 16
698	  3	199.8	36.1	 16
699	  3	244.8	31.0	 16
700	  3	2074.5	189.6	 16
701	  3	799.8	62.1	 16
702	  3	261.0	30.9	 16
703	  3	449.5	49.8	 16
704	  3	365.3	47.1	 16
705	  3	963.0	68.2	 16
706	  3	115.3	17.4	 16
707	  3	55.3	14.4	 16
708	  3	8549.0	955.0	 16
709	  3	110.5	22.7	 16
710	  3	8857.3	903.5	 16
711	  3	86.8	11.4	 16
  0	  4	51.0	5.5	 16
  1	  4	57.3	15.4	 16
  2	  4	62.5	12.6	 16
  3	  4	56.3	13.5	 16
  4	  4	56.5	10.5	 16
  5	  4	158.0	20.8	 16
  6	  4	73.8	13.1	 16
  7	  4	230.3	32.6	 16
  8	  4	72.0	13.6	 16
  9	  4	103.0	16.8	 16
 10	  4	79.5	10.9	 16
 11	  4	184.5	35.4	 16
 12	  4	92.0	13.2	 16
 13	  4	184.3	27.2	 16
 14	  4	99.0	11.5	 16
 15	  4	199.3	28.0	 16
 16	  4	199.5	22.6	 16
 17	  4	1622.3	100.8	 16
 18	  4	886.0	57.3	 16
 19	  4	651.3	91.1	 16
 20	  4	99.8	16.3	 16
 21	  4	84.0	13.8	 16
 22	  4	219.8	40.0	 16
 23	  4	485.0	119.0	 16
 24	  4	79.8	12.6	 16
 25	  4	151.8	15.7	 16
 26	  4	139.0	23.6	 16
 27	  4	146.3	17.9	 16
 28	  4	135.3	23.0	 16
 29	  4	128.8	16.2	 16
 30	  4	132.5	23.0	 16
 31	  4	170.5	26.6	 16
 32	  4	118.0	14.3	 16
 33	  4	162.5	17.7	 16
 34	  4	189.5	30.1	 16
 35	  4	362.3	50.4	 16
 36	  4	180.3	32.3	 16
 37	  4	170.3	20.4	 16
 38	  4	143.8	21.9	 16
 39	  4	92.3	13.0	 16
 40	  4	132.5	15.4	 16
 41	  4	185.3	41.0	 16
 42	  4	191.0	36.6	 16
 43	  4	122.5	21.5	 16
 44	  4	143.3	18.9	 16
 45	  4	86.3	13.2	 16
 46	  4	184.5	33.7	 16
 47	  4	229.0	39.4	 16
 48	  4	79.3	11.6	 16
 49	  4	84.3	14.0	 16
 50	  4	176.8	29.2	 16
 51	  4	185.8	21.7	 16
 52	  4	196.0	24.4	 16
 53	  4	95.8	11.2	 16
 54	  4	146.3	29.6	 16
 55	  4	214.3	23.9	 16
 56	  4	251.5	38.8	 16
 57	  4	208.0	26.4	 16
 58	  4	118.3	14.1	 16
 59	  4	143.3	29.8	 16
 60	  4	81.0	11.3	 16
 61	  4	198.0	21.0	 16
 62	  4	135.3	27.8	 16
 63	  4	343.0	54.2	 16
 64	  4	2087.5	501.6	 16
 65	  4	125.3	18.3	 20
 66	  4	112.8	26.6	 16
 67	  4	233.0	53.9	 16
 68	  4	100.0	20.3	 16
 69	  4	113.3	27.0	 16
 70	  4	195.5	29.9	 16
 71	  4	114.0	17.6	 16
 72	  4	159.3	45.8	 16
 73	  4	408.3	86.4	 16
 74	  4	134.8	20.9	 16
 75	  4	96.0	19.0	 16
 76	  4	82.0	19.1	 16
 77	  4	86.8	9.0	 16
 78	  4	177.5	17.8	 16
 79	  4	111.8	17.1	 16
 80	  4	102.3	17.1	 16
 81	  4	89.0	11.4	 16
 82	  4	83.3	10.5	 16
 83	  4	360.3	56.9	 16
 84	  4	226.3	47.1	 16
 85	  4	104.8	15.6	 16
 86	  4	121.0	17.8	 16
 87	  4	248.3	33.3	 16
 88	  4	576.0	61.6	 16
 89	  4	323.5	39.2	 16
 90	  4	189.3	28.1	 16
 91	  4	295.3	24.7	 16
 92	  4	328.0	29.8	 16
 93	  4	378.3	40.5	 16
 94	  4	342.3	42.3	 16
 95	  4	339.3	45.5	 16
 96	  4	181.8	24.6	 16
 97	  4	344.3	30.3	 16
 98	  4	130.5	19.1	 16
 99	  4	81.3	14.5	 16
100	  4	181.3	22.8	 16
101	  4	354.0	20.4	 16
102	  4	77.0	9.1	 16
103	  4	177.0	28.5	 16
104	  4	174.0	22.1	 16
105	  4	125.8	20.4	 16
106	  4	89.3	16.4	 16
107	  4	226.0	36.6	 16
108	  4	83.8	12.2	 16
109	  4	161.3	20.6	 16
110	  4	67.3	13.7	 16
111	  4	89.3	12.1	 16
112	  4	207.5	19.3	 16
113	  4	146.8	22.7	 16
114	  4	131.5	20.5	 16
115	  4	106.0	20.6	 16
116	  4	94.3	14.3	 16
117	  4	120.0	20.0	 16
118	  4	96.0	15.9	 16
119	  4	199.5	24.1	 16
120	  4	215.5	37.3	 16
121	  4	168.5	32.5	 16
122	  4	89.5	14.4	 16
123	  4	62.0	11.7	 16
124	  4	73.0	14.1	 16
125	  4	68.5	13.8	 16
126	  4	92.5	12.0	 16
127	  4	67.3	14.8	 16
128	  4	74.0	13.0	 16
129	  4	65.0	11.6	 16
130	  4	121.3	15.4	 16
131	  4	694.8	69.2	 16
132	  4	328.3	37.3	 16
133	  4	103.5	38.3	 16
134	  4	264.5	30.8	 16
135	  4	147.8	20.2	 16
136	  4	683.3	153.2	 16
137	  4	86.8	32.3	 16
138	  4	194.3	58.3	 16
139	  4	427.8	66.6	 16
140	  4	86.8	17.2	 16
141	  4	79.8	12.7	 16
142	  4	410.0	41.7	 16
143	  4	296.5	64.3	 16
144	  4	56.0	9.5	 16
145	  4	73.3	12.0	 16
146	  4	1655.0	265.3	 16
147	  4	146.3	26.8	 16
148	  4	104.0	14.8	 16
149	  4	85.5	13.0	 16
150	  4	101.0	16.4	 16
151	  4	152.8	30.5	 16
152	  4	124.3	21.0	 16
153	  4	128.8	18.4	 16
154	  4	69.3	13.9	 16
155	  4	108.5	11.6	 16
156	  4	55.3	11.6	 16
157	  4	79.3	11.8	 16
158	  4	85.3	14.6	 16
159	  4	103.5	20.2	 16
160	  4	327.3	32.6	 16
161	  4	382.8	39.1	 16
162	  4	965.5	174.0	 16
163	  4	113.3	18.5	 16
164	  4	195.3	27.6	 16
165	  4	217.0	36.8	 16
166	  4	89.0	11.5	 16
167	  4	179.8	18.6	 16
168	  4	107.3	15.5	 16
169	  4	77.3	11.4	 16
170	  4	93.5	10.8	 16
171	  4	59.8	12.3	 16
172	  4	91.0	14.5	 16
173	  4	59.5	8.9	 16
174	  4	87.5	12.9	 16
175	  4	57.8	13.1	 16
176	  4	202.3	19.6	 16
177	  4	65.3	12.4	 16
178	  4	54.5	11.9	 16
179	  4	281.8	39.2	 16
180	  4	331.8	32.8	 16
181	  4	74.5	13.8	 16
182	  4	71.0	10.9	 16
183	  4	171.5	28.0	 20
184	  4	83.8	13.6	 16
185	  4	89.0	23.5	 16
186	  4	63.5	12.3	 16
187	  4	65.3	12.4	 16
188	  4	55.3	11.4	 16
189	  4	71.0	13.4	 16
190	  4	101.8	25.2	 16
191	  4	173.3	35.4	 16
192	  4	196.3	51.6	 16
193	  4	89.3	14.4	 16
194	  4	116.5	20.1	 16
195	  4	121.8	24.7	 16
196	  4	152.5	23.2	 16
197	  4	235.0	11.6	 16
198	  4	170.8	32.2	 16
199	  4	270.0	41.4	 16
200	  4	101.5	16.5	 16
201	  4	108.8	22.2	 16
202	  4	169.3	36.0	 16
203	  4	88.0	19.2	 16
204	  4	81.3	18.9	 16
205	  4	138.0	39.4	 16
206	  4	109.0	15.5	 16
207	  4	119.0	17.5	 16
208	  4	63.0	11.8	 16
209	  4	78.0	11.3	 16
210	  4	80.3	16.6	 16
211	  4	61.5	12.2	 16
212	  4	60.0	11.6	 16
213	  4	93.3	13.2	 16
214	  4	60.5	15.0	 16
215	  4	88.3	12.8	 16
216	  4	92.5	19.9	 16
217	  4	214.3	31.6	 16
218	  4	135.5	12.8	 16
219	  4	123.3	15.5	 16
220	  4	90.3	13.5	 16
221	  4	107.8	20.4	 16
222	  4	92.3	18.4	 16
223	  4	76.3	11.4	 16
224	  4	62.0	10.0	 16
225	  4	72.3	13.3	 16
226	  4	96.8	16.3	 16
227	  4	83.0	17.2	 16
228	  4	77.3	18.6	 16
229	  4	81.3	14.0	 16
230	  4	78.3	12.1	 16
231	  4	71.3	10.3	 16
232	  4	57.0	11.8	 16
233	  4	70.3	11.5	 16
234	  4	60.5	10.3	 16
235	  4	43.3	7.1	 16
236	  4	42.0	7.3	 16
237	  4	41.3	10.4	 16
238	  4	45.5	11.1	 16
239	  4	47.3	9.5	 16
240	  4	154.3	21.0	 16
241	  4	138.3	24.7	 16
242	  4	96.0	16.4	 16
243	  4	430.5	32.9	 16
244	  4	106.5	16.3	 16
245	  4	96.3	17.1	 16
246	  4	240.3	28.0	 16
247	  4	161.3	28.5	 16
248	  4	61.3	10.3	 16
249	  4	73.8	8.8	 16
250	  4	74.5	18.3	 16
251	  4	81.3	14.6	 16
252	  4	90.5	13.0	 16
253	  4	66.3	8.7	 16
254	  4	82.3	13.9	 16
255	  4	90.3	12.4	 16
256	  4	66.8	12.0	 16
257	  4	72.5	8.6	 16
258	  4	155.8	21.6	 16
259	  4	62.0	15.9	 16
260	  4	66.0	12.1	 16
261	  4	72.8	14.7	 16
262	  4	58.8	11.6	 16
263	  4	103.3	19.1	 16
264	  4	282.5	32.1	 16
265	  4	84.8	13.1	 16
266	  4	161.3	25.9	 16
267	  4	93.0	23.4	 16
268	  4	68.3	14.5	 16
269	  4	98.0	15.2	 16
270	  4	134.0	18.7	 16
271	  4	82.5	15.7	 16
272	  4	274.5	32.3	 12
273	  4	1009.0	183.5	 16
274	  4	378.8	82.1	 16
275	  4	255.3	43.3	 16
276	  4	134.3	17.4	 16
277	  4	135.8	20.8	 16
278	  4	146.8	21.3	 16
279	  4	101.3	15.5	 16
280	  4	98.5	13.2	 16
281	  4	87.3	15.4	 16
282	  4	63.3	10.0	 16
283	  4	128.0	22.1	 16
284	  4	97.0	18.3	 16
285	  4	193.5	24.4	 16
286	  4	119.0	13.2	 16
287	  4	160.3	22.2	 16
288	  4	112.3	19.3	 16
289	  4	78.5	14.1	 16
290	  4	117.8	21.3	 16
291	  4	68.0	11.8	 16
292	  4	123.8	16.8	 16
293	  4	237.8	29.4	 16
294	  4	133.3	18.7	 16
295	  4	92.0	19.7	 16
296	  4	79.5	15.0	 16
297	  4	141.3	27.3	 16
298	  4	217.8	34.8	 16
299	  4	186.8	18.1	 16
300	  4	106.0	18.0	 16
301	  4	83.5	12.3	 16
302	  4	86.3	12.5	 20
303	  4	117.0	21.7	 16
304	  4	151.0	32.7	 16
305	  4	59.8	11.8	 16
306	  4	61.8	11.3	 16
307	  4	97.3	19.6	 16
308	  4	105.8	20.9	 16
309	  4	587.3	46.5	 16
310	  4	664.0	183.3	 16
311	  4	153.0	43.6	 16
312	  4	240.5	40.2	 16
313	  4	347.0	93.4	 16
314	  4	176.8	35.4	 16
315	  4	177.0	51.5	 16
316	  4	184.3	56.6	 16
317	  4	70.3	13.0	 16
318	  4	59.3	11.6	 16
319	  4	79.3	22.0	 16
320	  4	155.0	30.7	 16
321	  4	184.0	32.5	 16
322	  4	91.0	15.6	 16
323	  4	96.5	19.4	 16
324	  4	130.3	32.4	 16
325	  4	193.8	49.5	 16
326	  4	151.3	41.4	 16
327	  4	67.5	12.2	 16
328	  4	187.5	38.6	 16
329	  4	421.5	115.0	 16
330	  4	67.0	12.1	 16
331	  4	66.3	13.6	 16
332	  4	69.3	14.0	 16
333	  4	67.0	15.4	 16
334	  4	54.0	12.4	 16
335	  4	65.3	11.3	 16
336	  4	61.3	10.1	 16
337	  4	76.3	12.3	 16
338	  4	81.3	13.9	 16
339	  4	64.0	12.1	 16
340	  4	86.5	11.9	 16
341	  4	673.3	144.7	 16
342	  4	93.3	17.0	 16
343	  4	124.5	21.3	 16
344	  4	142.3	17.0	 16
345	  4	177.3	33.2	 16
346	  4	102.0	23.1	 16
347	  4	83.5	15.3	 16
348	  4	484.3	73.7	 16
349	  4	180.5	28.4	 16
350	  4	64.3	12.9	 16
351	  4	74.8	11.9	 16
352	  4	108.0	16.1	 16
353	  4	98.3	17.7	 16
354	  4	81.5	11.0	 16
355	  4	127.3	23.7	 16
356	  4	76.3	12.9	 16
357	  4	176.0	33.2	 16
358	  4	58.8	8.8	 16
359	  4	64.5	10.9	 16
360	  4	77.0	10.6	 16
361	  4	295.5	49.6	 16
362	  4	334.8	59.1	 16
363	  4	373.8	60.8	 16
364	  4	207.8	34.3	 16
365	  4	490.8	65.9	 16
366	  4	67.5	16.2	 16
367	  4	85.3	10.5	 16
368	  4	78.8	17.3	 16
369	  4	108.8	15.3	 16
370	  4	110.5	22.0	 16
371	  4	222.8	23.3	 16
372	  4	130.3	18.1	 16
373	  4	388.8	52.7	 16
374	  4	64.3	20.0	 16
375	  4	104.5	22.2	 16
376	  4	129.5	21.4	 16
377	  4	78.0	11.6	 16
378	  4	111.3	14.4	 16
379	  4	114.3	23.8	 16
380	  4	305.0	54.1	 16
381	  4	1543.0	121.7	 16
382	  4	659.0	61.4	 16
383	  4	639.0	61.8	 16
384	  4	91.3	12.3	 16
385	  4	69.3	10.6	 16
386	  4	59.3	13.0	 16
387	  4	246.0	23.1	 16
388	  4	66.0	13.5	 16
389	  4	124.3	23.4	 16
390	  4	71.3	10.1	 16
391	  4	60.3	12.6	 16
392	  4	90.3	19.0	 16
393	  4	72.8	15.5	 16
394	  4	115.0	14.6	 16
395	  4	183.5	18.5	 16
396	  4	267.8	30.0	 16
397	  4	82.3	10.1	 16
398	  4	71.3	14.9	 16
399	  4	82.3	20.6	 16
400	  4	208.8	39.6	 16
401	  4	114.5	17.7	 16
402	  4	126.0	27.5	 16
403	  4	47.8	8.9	 16
404	  4	65.0	10.2	 16
405	  4	171.3	22.6	 16
406	  4	138.8	17.4	 16
407	  4	237.3	18.3	 16
408	  4	84.8	14.7	 16
409	  4	97.3	13.6	 16
410	  4	115.0	22.2	 16
411	  4	384.3	46.6	 16
412	  4	375.3	36.3	 16
413	  4	979.3	116.3	 16
414	  4	71.8	13.8	 16
415	  4	108.3	13.8	 16
416	  4	73.8	15.1	 16
417	  4	79.5	13.3	 16
418	  4	91.0	14.2	 16
419	  4	248.3	33.3	 16
420	  4	55.5	10.6	 16
421	  4	164.5	40.9	 20
422	  4	176.3	38.9	 16
423	  4	143.5	19.2	 16
424	  4	91.8	13.9	 16
425	  4	395.8	114.9	 16
426	  4	50.5	10.6	 16
427	  4	64.3	12.7	 16
428	  4	54.5	8.4	 16
429	  4	244.5	48.5	 16
430	  4	272.3	35.7	 16
431	  4	97.0	15.2	 16
432	  4	69.3	12.2	 16
433	  4	122.8	20.9	 16
434	  4	125.5	21.9	 16
435	  4	56.5	13.3	 16
436	  4	57.0	7.5	 16
437	  4	56.3	11.9	 16
438	  4	81.3	15.4	 16
439	  4	97.3	14.1	 16
440	  4	83.8	15.1	 16
441	  4	82.5	15.6	 16
442	  4	88.5	17.6	 16
443	  4	483.8	104.4	 16
444	  4	107.5	20.0	 16
445	  4	63.3	12.3	 16
446	  4	59.5	12.4	 16
447	  4	60.0	10.7	 16
448	  4	69.3	13.6	 16
449	  4	91.5	18.0	 16
450	  4	174.3	28.7	 16
451	  4	64.3	11.7	 16
452	  4	119.5	20.5	 16
453	  4	380.8	50.8	 16
454	  4	904.0	142.1	 16
455	  4	180.8	26.7	 16
456	  4	264.3	40.2	 16
457	  4	104.0	22.3	 16
458	  4	74.0	13.6	 16
459	  4	123.8	19.4	 16
460	  4	555.3	219.5	 16
461	  4	1286.5	163.3	 16
462	  4	63.0	10.5	 16
463	  4	58.3	7.9	 16
464	  4	381.5	41.8	 16
465	  4	720.8	49.4	 16
466	  4	774.3	68.1	 16
467	  4	812.5	164.0	 16
468	  4	165.5	25.4	 16
469	  4	82.3	11.7	 16
470	  4	364.5	69.4	 16
471	  4	69.0	17.0	 16
472	  4	41.0	11.4	 16
473	  4	41.0	9.6	 16
474	  4	49.8	14.9	 16
475	  4	43.3	11.3	 16
476	  4	45.3	9.0	 16
477	  4	113.3	18.1	 16
478	  4	86.8	19.4	 16
479	  4	132.8	19.0	 16
480	  4	49.3	9.1	 16
481	  4	66.0	13.6	 16
482	  4	80.3	15.7	 16
483	  4	134.8	18.7	 16
484	  4	66.3	10.5	 16
485	  4	129.8	21.9	 16
486	  4	73.5	15.2	 16
487	  4	57.0	10.3	 16
488	  4	150.3	28.4	 16
489	  4	58.3	8.8	 16
490	  4	58.3	11.0	 16
491	  4	66.3	12.1	 16
492	  4	80.3	13.5	 16
493	  4	113.3	16.5	 16
494	  4	69.3	14.5	 16
495	  4	411.5	75.7	 16
496	  4	115.3	19.6	 16
497	  4	685.5	100.5	 16
498	  4	92.3	15.2	 16
499	  4	64.5	8.5	 16
500	  4	117.3	15.9	 16
501	  4	183.5	30.7	 16
502	  4	262.8	39.8	 16
503	  4	63.3	14.2	 16
504	  4	63.8	12.7	 16
505	  4	1689.0	346.3	 16
506	  4	99.3	16.7	 16
507	  4	122.5	17.4	 16
508	  4	73.5	14.6	 16
509	  4	125.3	19.7	 16
510	  4	300.8	23.2	 16
511	  4	206.8	42.3	 16
512	  4	289.8	47.9	 16
513	  4	58.0	8.1	 16
514	  4	67.3	13.0	 16
515	  4	71.3	11.7	 16
516	  4	124.3	15.3	 16
517	  4	120.3	9.6	 16
518	  4	85.3	12.4	 16
519	  4	96.0	9.7	 16
520	  4	56.5	11.8	 16
521	  4	79.3	15.4	 16
522	  4	301.8	37.3	 16
523	  4	194.5	25.2	 16
524	  4	151.0	19.6	 16
525	  4	55.5	7.7	 16
526	  4	74.0	17.0	 16
527	  4	78.3	16.2	 16
528	  4	78.3	11.2	 16
529	  4	86.3	17.6	 16
530	  4	71.3	10.9	 16
531	  4	57.5	10.7	 16
532	  4	99.5	15.4	 16
533	  4	65.3	14.7	 16
534	  4	117.0	24.3	 16
535	  4	206.5	24.4	 16
536	  4	147.3	24.7	 16
537	  4	130.5	20.5	 16
538	  4	108.8	23.3	 16
539	  4	120.8	19.1	 20
540	  4	59.0	7.2	 16
541	  4	96.0	21.9	 16
542	  4	108.0	15.9	 16
543	  4	371.8	48.8	 16
544	  4	280.3	54.3	 16
545	  4	163.0	27.1	 16
546	  4	101.5	19.9	 16
547	  4	160.5	20.9	 16
548	  4	324.0	57.6	 16
549	  4	84.3	15.4	 16
550	  4	59.5	9.5	 16
551	  4	69.5	12.7	 16
552	  4	127.3	25.3	 16
553	  4	56.5	10.0	 16
554	  4	387.3	82.8	 16
555	  4	51.3	9.9	 16
556	  4	104.0	17.1	 16
557	  4	77.3	10.6	 16
558	  4	164.3	26.3	 16
559	  4	310.0	40.8	 16
560	  4	971.0	116.0	 16
561	  4	1056.5	113.5	 16
562	  4	502.3	53.5	 16
563	  4	105.3	21.3	 16
564	  4	284.3	35.5	 16
565	  4	267.3	25.1	 16
566	  4	591.3	125.0	 16
567	  4	56.0	9.2	 16
568	  4	108.0	19.7	 16
569	  4	86.8	14.4	 16
570	  4	64.8	14.9	 16
571	  4	56.5	12.2	 16
572	  4	155.5	30.8	 16
573	  4	77.0	11.7	 16
574	  4	79.0	14.8	 16
575	  4	153.5	27.6	 16
576	  4	114.5	18.0	 16
577	  4	164.0	25.3	 16
578	  4	57.3	13.6	 16
579	  4	121.3	19.8	 16
580	  4	135.5	22.9	 16
581	  4	130.0	9.7	 16
582	  4	158.0	19.1	 16
583	  4	133.5	19.6	 16
584	  4	198.3	22.3	 16
585	  4	308.5	33.9	 16
586	  4	105.3	21.8	 16
587	  4	110.0	15.7	 16
588	  4	161.0	17.7	 16
589	  4	178.5	23.6	 16
590	  4	115.5	13.7	 16
591	  4	109.3	17.1	 16
592	  4	150.5	25.9	 16
593	  4	107.8	12.4	 16
594	  4	89.8	16.5	 16
595	  4	100.5	17.7	 16
596	  4	93.5	13.2	 16
597	  4	95.5	20.5	 16
598	  4	87.3	14.9	 16
599	  4	101.5	12.9	 16
600	  4	258.5	33.1	 16
601	  4	236.3	22.5	 16
602	  4	331.5	32.0	 16
603	  4	632.8	65.8	 16
604	  4	116.3	9.5	 16
605	  4	561.8	63.7	 16
606	  4	111.0	21.0	 16
607	  4	112.3	17.3	 16
608	  4	189.3	35.2	 16
609	  4	149.0	25.3	 16
610	  4	156.0	24.4	 16
611	  4	126.3	25.5	 16
612	  4	91.0	19.6	 16
613	  4	59.0	12.5	 16
614	  4	138.8	21.7	 16
615	  4	54.8	11.9	 16
616	  4	104.5	17.8	 16
617	  4	121.8	19.0	 16
618	  4	61.8	12.4	 16
619	  4	79.8	15.5	 16
620	  4	529.8	84.0	 16
621	  4	96.5	20.5	 16
622	  4	74.3	14.8	 16
623	  4	78.8	15.7	 16
624	  4	54.3	11.2	 16
625	  4	182.8	25.6	 16
626	  4	90.0	19.1	 16
627	  4	307.0	47.1	 16
628	  4	241.3	41.3	 16
629	  4	334.0	45.2	 16
630	  4	84.0	13.9	 16
631	  4	151.3	24.2	 16
632	  4	73.8	14.5	 16
633	  4	129.8	23.8	 16
634	  4	98.0	15.9	 16
635	  4	99.3	13.9	 16
636	  4	182.8	19.3	 16
637	  4	292.5	31.8	 16
638	  4	88.3	13.2	 16
639	  4	151.5	26.9	 16
640	  4	145.3	14.9	 16
641	  4	88.0	14.0	 16
642	  4	62.0	12.0	 16
643	  4	99.8	17.9	 16
644	  4	225.8	41.5	 16
645	  4	324.5	50.9	 16
646	  4	269.5	47.5	 16
647	  4	54.3	7.1	 16
648	  4	126.8	20.8	 16
649	  4	73.3	12.3	 16
650	  4	50.0	12.1	 16
651	  4	112.5	16.7	 16
652	  4	61.3	12.3	 16
653	  4	92.5	19.8	 16
654	  4	57.5	11.6	 16
655	  4	80.8	14.3	 16
656	  4	79.3	15.1	 16
657	  4	68.3	10.3	 16
658	  4	60.0	11.6	 20
659	  4	59.3	6.0	 16
660	  4	78.5	11.3	 16
661	  4	194.5	28.7	 16
662	  4	155.3	25.5	 16
663	  4	380.0	69.9	 16
664	  4	97.8	18.3	 16
665	  4	119.5	34.5	 16
666	  4	480.3	77.6	 16
667	  4	72.3	13.7	 16
668	  4	93.8	17.0	 16
669	  4	79.0	11.2	 16
670	  4	103.8	13.1	 16
671	  4	163.0	27.4	 16
672	  4	162.8	47.2	 16
673	  4	709.8	52.9	 16
674	  4	345.8	47.1	 16
675	  4	324.8	30.9	 16
676	  4	82.0	11.5	 16
677	  4	152.5	25.7	 16
678	  4	62.0	12.2	 16
679	  4	76.5	9.8	 16
680	  4	223.5	38.0	 16
681	  4	66.8	12.2	 16
682	  4	55.3	10.3	 16
683	  4	64.8	9.9	 16
684	  4	59.0	7.2	 16
685	  4	121.3	18.7	 16
686	  4	153.3	26.8	 16
687	  4	88.0	15.5	 16
688	  4	78.5	16.0	 16
689	  4	90.3	17.4	 16
690	  4	1139.5	144.7	 16
691	  4	148.3	19.2	 16
692	  4	556.5	104.7	 16
693	  4	86.3	12.6	 16
694	  4	213.0	130.6	 16
695	  4	235.8	35.9	 16
696	  4	244.0	42.3	 16
697	  4	55.0	7.5	 16
698	  4	73.3	13.2	 16
699	  4	103.8	15.9	 16
700	  4	191.0	40.8	 16
701	  4	161.3	28.0	 16
702	  4	215.3	20.5	 16
703	  4	356.5	43.7	 16
704	  4	351.3	44.1	 16
705	  4	559.5	60.9	 16
706	  4	102.3	14.9	 16
707	  4	44.5	8.7	 16
708	  4	49.0	9.6	 16
709	  4	44.0	8.9	 16
710	  4	50.8	8.9	 16
711	  4	46.3	12.0	 16
  0	  5	110.5	17.3	 16
  1	  5	80.8	12.6	 16
  2	  5	80.3	14.6	 16
  3	  5	244.5	31.8	 16
  4	  5	74.8	13.9	 16
  5	  5	348.8	42.4	 16
  6	  5	1195.3	59.9	 16
  7	  5	154.3	23.9	 16
  8	  5	97.3	14.1	 16
  9	  5	214.3	30.3	 16
 10	  5	165.0	28.6	 16
 11	  5	65.0	11.9	 16
 12	  5	104.0	13.9	 16
 13	  5	7251.3	473.5	 16
 14	  5	7609.0	445.8	 16
 15	  5	7663.0	902.3	 16
 16	  5	125.3	17.4	 16
 17	  5	87.5	16.6	 16
 18	  5	121.0	21.4	 16
 19	  5	134.3	19.4	 16
 20	  5	119.3	16.4	 16
 21	  5	120.5	19.9	 16
 22	  5	104.3	13.2	 16
 23	  5	69.8	10.4	 16
 24	  5	123.5	19.9	 16
 25	  5	120.8	21.3	 16
 26	  5	129.5	12.0	 16
 27	  5	118.3	15.8	 16
 28	  5	121.5	16.8	 16
 29	  5	68.0	8.4	 16
 30	  5	121.3	14.1	 16
 31	  5	118.3	13.8	 16
 32	  5	114.3	20.4	 16
 33	  5	113.8	17.1	 16
 34	  5	107.0	17.0	 16
 35	  5	82.3	10.5	 16
 36	  5	123.5	19.5	 16
 37	  5	7198.0	764.9	 16
 38	  5	7502.3	755.9	 16
 39	  5	7562.8	1590.9	 16
 40	  5	108.0	9.6	 16
 41	  5	76.8	17.3	 16
 42	  5	7750.0	1405.3	 16
 43	  5	124.5	18.2	 16
 44	  5	112.0	14.5	 16
 45	  5	117.3	22.2	 16
 46	  5	104.8	19.2	 16
 47	  5	65.3	10.4	 16
 48	  5	101.8	10.0	 16
 49	  5	108.8	23.9	 16
 50	  5	118.3	14.8	 16
 51	  5	134.0	18.7	 16
 52	  5	143.8	31.7	 16
 53	  5	72.8	10.5	 16
 54	  5	116.0	14.8	 16
 55	  5	120.0	16.2	 16
 56	  5	94.5	13.7	 16
 57	  5	109.0	14.1	 16
 58	  5	106.5	14.3	 16
 59	  5	73.5	9.0	 16
 60	  5	77.3	7.5	 16
 61	  5	77.5	14.5	 16
 62	  5	7392.5	1287.8	 16
 63	  5	125.5	19.1	 16
 64	  5	111.0	16.1	 16
 65	  5	117.3	12.0	 16
 66	  5	6134.8	2107.5	 20
 67	  5	91.0	13.5	 16
 68	  5	202.0	145.7	 16
 69	  5	6829.3	1185.8	 16
 70	  5	6813.5	1107.2	 16
 71	  5	6014.5	2116.0	 16
 72	  5	112.5	22.2	 16
 73	  5	76.0	10.5	 16
 74	  5	110.3	15.7	 16
 75	  5	102.5	20.3	 16
 76	  5	94.5	18.5	 16
 77	  5	93.3	14.4	 16
 78	  5	96.3	17.6	 16
 79	  5	115.5	61.3	 16
 80	  5	6938.5	2107.1	 16
 81	  5	119.8	18.4	 16
 82	  5	115.5	21.6	 16
 83	  5	129.5	36.4	 16
 84	  5	6527.5	1872.7	 16
 85	  5	82.5	14.3	 16
 86	  5	105.8	14.5	 16
 87	  5	131.5	19.8	 16
 88	  5	7017.5	1675.0	 16
 89	  5	113.0	24.3	 16
 90	  5	107.5	22.5	 16
 91	  5	83.0	13.1	 16
 92	  5	111.0	15.3	 16
 93	  5	6224.8	523.2	 16
 94	  5	6116.8	1196.1	 16
 95	  5	128.3	19.4	 16
 96	  5	117.5	17.0	 16
 97	  5	73.0	11.9	 16
 98	  5	123.5	23.0	 16
 99	  5	6797.0	657.4	 16
100	  5	6932.3	1202.5	 16
101	  5	124.5	22.6	 16
102	  5	102.3	9.0	 16
103	  5	73.5	11.0	 16
104	  5	119.0	22.0	 16
105	  5	121.0	14.1	 16
106	  5	6189.0	1474.3	 16
107	  5	148.5	18.2	 16
108	  5	147.8	20.4	 16
109	  5	77.0	12.8	 16
110	  5	55.0	9.8	 16
111	  5	110.5	17.0	 16
112	  5	338.3	51.9	 16
113	  5	97.0	11.7	 16
114	  5	71.0	13.1	 16
115	  5	216.3	29.7	 16
116	  5	132.3	27.9	 16
117	  5	211.3	38.5	 16
118	  5	6576.3	1066.6	 16
119	  5	367.8	52.6	 16
120	  5	105.0	22.2	 16
121	  5	88.0	11.7	 16
122	  5	65.0	9.5	 16
123	  5	72.5	12.1	 16
124	  5	73.5	12.1	 16
125	  5	65.3	14.1	 16
126	  5	698.8	98.8	 16
127	  5	98.0	22.2	 16
128	  5	1241.0	248.7	 16
129	  5	485.5	93.5	 16
130	  5	208.0	21.8	 16
131	  5	310.3	56.1	 16
132	  5	67.5	13.1	 16
133	  5	254.3	25.8	 16
134	  5	161.5	27.7	 16
135	  5	143.8	21.2	 16
136	  5	63.3	12.0	 16
137	  5	66.0	11.6	 16
138	  5	67.3	15.4	 16
139	  5	841.5	192.8	 16
140	  5	81.3	32.0	 16
141	  5	618.0	141.2	 16
142	  5	82.0	17.5	 16
143	  5	909.0	203.4	 16
144	  5	176.3	34.4	 16
145	  5	83.3	16.2	 16
146	  5	142.5	28.3	 16
147	  5	1015.3	165.3	 16
148	  5	80.8	12.7	 16
149	  5	112.5	18.2	 16
150	  5	205.3	26.8	 16
151	  5	105.8	23.9	 16
152	  5	388.8	59.0	 16
153	  5	255.5	44.0	 16
154	  5	539.5	112.4	 16
155	  5	87.0	16.1	 16
156	  5	159.0	25.4	 16
157	  5	256.3	30.6	 16
158	  5	215.8	35.8	 16
159	  5	444.3	53.7	 16
160	  5	171.0	25.8	 16
161	  5	228.3	23.0	 16
162	  5	231.8	37.3	 16
163	  5	151.3	18.9	 16
164	  5	162.5	22.1	 16
165	  5	1187.5	129.9	 16
166	  5	238.0	31.6	 16
167	  5	141.8	17.4	 16
168	  5	92.3	19.8	 16
169	  5	347.3	33.9	 16
170	  5	166.5	20.7	 16
171	  5	226.0	33.4	 16
172	  5	360.0	51.1	 16
173	  5	87.0	17.2	 16
174	  5	835.8	120.3	 16
175	  5	166.3	23.6	 16
176	  5	63.3	10.2	 16
177	  5	65.5	11.2	 16
178	  5	55.0	13.1	 16
179	  5	175.5	51.0	 16
180	  5	764.8	108.3	 16
181	  5	922.5	116.2	 16
182	  5	167.8	27.6	 16
183	  5	102.3	19.2	 16
184	  5	61.5	8.4	 16
185	  5	625.3	166.6	 20
186	  5	161.3	29.2	 16
187	  5	84.5	17.1	 16
188	  5	139.5	24.9	 16
189	  5	76.8	16.8	 16
190	  5	83.5	16.9	 16
191	  5	82.3	16.4	 16
192	  5	212.3	48.6	 16
193	  5	151.8	30.4	 16
194	  5	274.3	70.2	 16
195	  5	282.3	40.1	 16
196	  5	199.3	22.6	 16
197	  5	187.0	32.8	 16
198	  5	162.0	23.2	 16
199	  5	92.5	18.7	 16
200	  5	214.0	32.9	 16
201	  5	109.8	18.5	 16
202	  5	105.8	16.2	 16
203	  5	114.8	19.3	 16
204	  5	123.5	28.8	 16
205	  5	56.3	10.1	 16
206	  5	826.5	186.3	 16
207	  5	59.0	10.9	 16
208	  5	69.3	13.8	 16
209	  5	153.0	26.3	 16
210	  5	277.3	45.2	 16
211	  5	87.3	15.4	 16
212	  5	91.8	14.3	 16
213	  5	422.3	73.6	 16
214	  5	514.5	90.9	 16
215	  5	90.0	20.4	 16
216	  5	157.3	25.4	 16
217	  5	1482.3	289.5	 16
218	  5	72.3	9.4	 16
219	  5	67.8	11.5	 16
220	  5	64.5	11.5	 16
221	  5	336.5	71.5	 16
222	  5	91.8	19.9	 16
223	  5	100.5	13.1	 16
224	  5	230.8	29.8	 16
225	  5	62.5	10.8	 16
226	  5	163.5	24.8	 16
227	  5	296.8	48.6	 16
228	  5	115.0	19.3	 16
229	  5	446.0	49.4	 16
230	  5	95.3	15.4	 16
231	  5	294.3	40.1	 16
232	  5	49.5	9.0	 16
233	  5	170.3	27.0	 16
234	  5	72.5	13.5	 16
235	  5	468.3	41.5	 16
236	  5	68.3	10.9	 16
237	  5	75.5	11.4	 16
238	  5	122.8	19.6	 16
239	  5	591.8	95.8	 16
240	  5	84.0	24.8	 16
241	  5	85.0	14.1	 16
242	  5	102.0	11.9	 16
243	  5	279.0	40.3	 16
244	  5	113.3	17.2	 16
245	  5	649.5	89.9	 16
246	  5	544.0	70.0	 16
247	  5	167.0	28.0	 16
248	  5	235.3	30.5	 16
249	  5	118.3	14.9	 16
250	  5	83.8	10.9	 16
251	  5	4814.8	562.9	 16
252	  5	60.5	8.4	 16
253	  5	53.0	8.5	 16
254	  5	60.3	11.5	 16
255	  5	614.0	65.1	 16
256	  5	1230.8	143.8	 16
257	  5	117.8	18.0	 16
258	  5	232.3	40.4	 16
259	  5	64.0	16.2	 16
260	  5	59.3	12.0	 16
261	  5	63.8	8.1	 16
262	  5	550.3	85.0	 16
263	  5	63.5	12.3	 16
264	  5	112.5	23.4	 16
265	  5	84.0	19.3	 16
266	  5	57.3	9.7	 16
267	  5	126.3	18.4	 16
268	  5	88.0	17.3	 16
269	  5	122.5	21.6	 16
270	  5	79.0	15.7	 16
271	  5	1037.8	143.3	 16
272	  5	407.0	65.8	 16
273	  5	85.3	11.7	 16
274	  5	91.0	18.3	 16
275	  5	101.3	18.6	 16
276	  5	56.8	9.7	 16
277	  5	58.3	11.1	 16
278	  5	312.5	52.9	 16
279	  5	84.0	15.9	 16
280	  5	128.3	21.2	 16
281	  5	1080.3	66.4	 16
282	  5	1188.8	101.9	 16
283	  5	367.5	42.8	 16
284	  5	140.8	20.0	 16
285	  5	508.0	63.8	 16
286	  5	63.3	13.3	 16
287	  5	174.0	26.8	 16
288	  5	228.8	27.8	 16
289	  5	215.5	33.3	 16
290	  5	2441.8	259.7	 16
291	  5	182.0	26.8	 16
292	  5	182.0	29.1	 16
293	  5	197.5	20.4	 16
294	  5	952.3	115.9	 16
295	  5	432.3	54.6	 16
296	  5	154.0	23.7	 16
297	  5	136.5	15.7	 16
298	  5	105.3	27.0	 16
299	  5	76.3	13.7	 16
300	  5	3313.8	450.1	 16
301	  5	129.5	20.5	 16
302	  5	710.0	80.3	 16
303	  5	1124.8	380.8	 20
304	  5	66.8	13.8	 16
305	  5	101.5	29.9	 16
306	  5	963.8	320.3	 16
307	  5	78.3	21.4	 16
308	  5	356.3	122.5	 16
309	  5	184.0	24.6	 16
310	  5	108.3	20.2	 16
311	  5	317.8	98.2	 16
312	  5	229.8	76.9	 16
313	  5	365.0	122.1	 16
314	  5	236.0	74.2	 16
315	  5	206.0	57.4	 16
316	  5	124.8	31.4	 16
317	  5	174.0	41.9	 16
318	  5	346.5	116.1	 16
319	  5	88.5	20.8	 16
320	  5	58.3	11.1	 16
321	  5	125.5	32.8	 16
322	  5	66.8	9.0	 16
323	  5	129.3	35.1	 16
324	  5	186.0	27.6	 16
325	  5	155.3	44.2	 16
326	  5	279.3	41.3	 16
327	  5	245.5	28.3	 16
328	  5	62.0	12.2	 16
329	  5	432.0	70.8	 16
330	  5	911.0	226.2	 16
331	  5	129.5	15.9	 16
332	  5	154.8	32.0	 16
333	  5	644.3	139.1	 16
334	  5	300.5	62.6	 16
335	  5	65.0	10.4	 16
336	  5	96.3	18.1	 16
337	  5	98.3	18.7	 16
338	  5	88.5	18.7	 16
339	  5	80.8	17.2	 16
340	  5	203.8	36.4	 16
341	  5	315.3	58.4	 16
342	  5	70.0	18.2	 16
343	  5	55.5	12.0	 16
344	  5	90.3	16.8	 16
345	  5	117.3	12.9	 16
346	  5	102.3	18.7	 16
347	  5	3058.3	539.2	 16
348	  5	88.8	18.1	 16
349	  5	296.5	53.8	 16
350	  5	274.5	42.3	 16
351	  5	537.3	41.1	 16
352	  5	497.3	74.9	 16
353	  5	160.8	25.3	 16
354	  5	137.0	24.8	 16
355	  5	5568.3	952.7	 16
356	  5	86.0	14.6	 16
357	  5	297.5	69.7	 16
358	  5	168.3	24.6	 16
359	  5	101.0	17.7	 16
360	  5	116.3	19.9	 16
361	  5	199.3	27.5	 16
362	  5	780.3	101.2	 16
363	  5	69.0	11.1	 16
364	  5	55.5	9.4	 16
365	  5	66.0	14.0	 16
366	  5	82.3	10.1	 16
367	  5	2540.3	283.7	 16
368	  5	258.8	40.8	 16
369	  5	363.3	60.4	 16
370	  5	78.0	13.5	 16
371	  5	297.3	27.9	 16
372	  5	375.0	46.1	 16
373	  5	102.5	18.0	 16
374	  5	71.3	14.4	 16
375	  5	69.3	10.2	 16
376	  5	75.5	12.7	 16
377	  5	105.3	15.7	 16
378	  5	159.3	25.8	 16
379	  5	109.5	16.7	 16
380	  5	171.5	24.0	 16
381	  5	101.0	16.6	 16
382	  5	398.5	58.8	 16
383	  5	459.8	38.6	 16
384	  5	97.3	19.8	 16
385	  5	129.8	19.9	 16
386	  5	255.8	42.3	 16
387	  5	424.3	49.6	 16
388	  5	362.3	54.1	 16
389	  5	1584.8	157.1	 16
390	  5	188.3	30.9	 16
391	  5	80.0	11.2	 16
392	  5	867.5	82.0	 16
393	  5	115.8	25.0	 16
394	  5	223.0	38.7	 16
395	  5	63.3	7.1	 16
396	  5	74.0	13.0	 16
397	  5	193.5	24.4	 16
398	  5	930.0	132.4	 16
399	  5	397.5	52.0	 16
400	  5	556.0	78.9	 16
401	  5	187.5	22.7	 16
402	  5	136.5	16.5	 16
403	  5	60.0	13.0	 16
404	  5	322.5	38.3	 16
405	  5	67.3	11.4	 16
406	  5	133.5	17.4	 16
407	  5	142.0	24.5	 16
408	  5	213.8	23.7	 16
409	  5	87.8	18.7	 16
410	  5	131.5	28.9	 16
411	  5	210.0	21.4	 16
412	  5	71.5	11.6	 16
413	  5	112.5	12.0	 16
414	  5	149.8	18.6	 16
415	  5	7529.3	460.8	 16
416	  5	7789.8	414.7	 16
417	  5	590.8	57.0	 16
418	  5	109.8	13.3	 16
419	  5	315.3	29.5	 16
420	  5	68.3	12.8	 16
421	  5	124.0	24.1	 16
422	  5	56.0	13.1	 20
423	  5	165.0	42.3	 16
424	  5	129.8	32.2	 16
425	  5	130.3	26.3	 16
426	  5	84.3	16.5	 16
427	  5	61.3	11.6	 16
428	  5	78.8	14.3	 16
429	  5	119.3	17.6	 16
430	  5	98.5	22.3	 16
431	  5	98.8	15.1	 16
432	  5	123.0	23.5	 16
433	  5	311.8	82.4	 16
434	  5	395.0	97.9	 16
435	  5	97.0	25.3	 16
436	  5	70.5	11.7	 16
437	  5	86.8	19.7	 16
438	  5	70.0	14.4	 16
439	  5	239.8	39.9	 16
440	  5	158.8	28.5	 16
441	  5	120.8	18.0	 16
442	  5	200.0	27.0	 16
443	  5	198.0	24.9	 16
444	  5	209.8	36.3	 16
445	  5	155.5	20.8	 16
446	  5	207.3	41.8	 16
447	  5	70.5	11.8	 16
448	  5	200.3	35.0	 16
449	  5	1524.0	361.5	 16
450	  5	889.3	164.6	 16
451	  5	2067.0	545.3	 16
452	  5	376.3	80.3	 16
453	  5	227.8	42.5	 16
454	  5	1060.8	269.8	 16
455	  5	407.3	88.2	 16
456	  5	68.3	13.5	 16
457	  5	120.5	18.1	 16
458	  5	638.8	143.5	 16
459	  5	85.3	10.4	 16
460	  5	100.5	16.7	 16
461	  5	454.3	79.4	 16
462	  5	102.0	22.2	 16
463	  5	523.5	77.8	 16
464	  5	2014.0	199.9	 16
465	  5	534.0	86.1	 16
466	  5	111.0	18.3	 16
467	  5	82.0	15.9	 16
468	  5	103.3	15.1	 16
469	  5	171.8	24.1	 16
470	  5	140.3	25.3	 16
471	  5	91.5	14.5	 16
472	  5	199.8	23.4	 16
473	  5	170.5	24.1	 16
474	  5	69.3	13.3	 16
475	  5	72.0	10.7	 16
476	  5	331.8	53.5	 16
477	  5	115.0	17.7	 16
478	  5	314.3	58.3	 16
479	  5	414.3	64.4	 16
480	  5	118.0	16.0	 16
481	  5	147.0	33.5	 16
482	  5	229.3	28.8	 16
483	  5	79.3	17.9	 16
484	  5	160.3	22.9	 16
485	  5	546.3	87.0	 16
486	  5	83.3	10.7	 16
487	  5	313.3	52.1	 16
488	  5	92.3	17.3	 16
489	  5	88.0	13.6	 16
490	  5	86.5	18.4	 16
491	  5	409.8	89.9	 16
492	  5	80.5	24.4	 16
493	  5	173.3	30.2	 16
494	  5	100.3	19.5	 16
495	  5	279.8	41.7	 16
496	  5	486.0	73.5	 16
497	  5	141.8	25.2	 16
498	  5	335.3	59.8	 16
499	  5	70.0	9.7	 16
500	  5	102.0	9.4	 16
501	  5	105.5	21.8	 16
502	  5	67.3	11.5	 16
503	  5	1117.5	194.6	 16
504	  5	85.0	13.8	 16
505	  5	372.8	56.2	 16
506	  5	68.0	10.9	 16
507	  5	66.5	11.1	 16
508	  5	305.5	47.7	 16
509	  5	5361.3	860.0	 16
510	  5	99.3	20.0	 16
511	  5	748.5	94.4	 16
512	  5	79.0	12.2	 16
513	  5	82.0	15.0	 16
514	  5	102.5	22.0	 16
515	  5	190.3	21.3	 16
516	  5	77.0	14.3	 16
517	  5	402.3	31.7	 16
518	  5	286.3	45.9	 16
519	  5	83.0	13.4	 16
520	  5	94.0	17.9	 16
521	  5	272.0	30.1	 16
522	  5	383.5	66.4	 16
523	  5	204.8	22.5	 16
524	  5	1117.3	118.8	 16
525	  5	69.3	13.9	 16
526	  5	183.3	40.4	 16
527	  5	1048.0	109.7	 16
528	  5	87.0	15.1	 16
529	  5	1416.0	131.7	 16
530	  5	499.0	54.2	 16
531	  5	192.5	18.9	 16
532	  5	123.3	15.9	 16
533	  5	185.5	24.5	 16
534	  5	188.0	16.1	 16
535	  5	178.8	20.6	 16
536	  5	797.0	49.2	 16
537	  5	116.5	17.0	 16
538	  5	7176.0	486.8	 16
539	  5	2138.3	163.2	 16
540	  5	74.5	14.7	 16
541	  5	190.0	38.9	 20
542	  5	440.0	104.5	 16
543	  5	87.0	11.8	 16
544	  5	249.0	45.0	 16
545	  5	307.3	39.7	 16
546	  5	297.3	37.0	 16
547	  5	273.5	31.6	 16
548	  5	151.0	25.9	 16
549	  5	162.8	19.4	 16
550	  5	90.8	20.0	 16
551	  5	215.5	41.7	 16
552	  5	70.0	11.6	 16
553	  5	314.8	69.5	 16
554	  5	98.5	20.7	 16
555	  5	166.5	23.1	 16
556	  5	105.0	15.8	 16
557	  5	203.8	37.6	 16
558	  5	61.0	13.1	 16
559	  5	127.3	20.8	 16
560	  5	225.3	25.9	 16
561	  5	324.3	41.7	 16
562	  5	9574.3	1840.1	 16
563	  5	87.3	14.1	 16
564	  5	92.5	15.7	 16
565	  5	188.5	36.8	 16
566	  5	1237.5	113.3	 16
567	  5	1670.8	297.1	 16
568	  5	311.0	40.9	 16
569	  5	272.8	38.0	 16
570	  5	1567.3	178.0	 16
571	  5	93.0	14.6	 16
572	  5	352.0	53.8	 16
573	  5	76.5	16.2	 16
574	  5	110.5	22.9	 16
575	  5	316.3	55.9	 16
576	  5	278.0	45.5	 16
577	  5	70.3	14.6	 16
578	  5	178.3	24.1	 16
579	  5	3405.8	289.6	 16
580	  5	131.0	20.5	 16
581	  5	423.0	42.9	 16
582	  5	522.8	41.1	 16
583	  5	259.3	32.5	 16
584	  5	125.3	16.0	 16
585	  5	143.3	22.1	 16
586	  5	160.3	24.0	 16
587	  5	241.5	20.7	 16
588	  5	141.3	22.5	 16
589	  5	78.5	19.3	 16
590	  5	68.8	12.0	 16
591	  5	61.8	12.9	 16
592	  5	357.0	25.0	 16
593	  5	443.0	43.9	 16
594	  5	122.0	25.7	 16
595	  5	124.5	27.7	 16
596	  5	149.0	18.8	 16
597	  5	349.0	43.2	 16
598	  5	731.5	57.6	 16
599	  5	52.3	7.2	 16
600	  5	146.0	15.2	 16
601	  5	341.0	54.9	 16
602	  5	1314.8	132.3	 16
603	  5	80.0	12.8	 16
604	  5	81.0	14.7	 16
605	  5	72.0	12.4	 16
606	  5	80.8	17.2	 16
607	  5	67.0	11.3	 16
608	  5	67.0	10.4	 16
609	  5	196.8	27.5	 16
610	  5	72.0	29.2	 16
611	  5	66.0	10.0	 16
612	  5	221.5	36.7	 16
613	  5	72.3	13.4	 16
614	  5	147.3	14.4	 16
615	  5	86.0	13.6	 16
616	  5	235.0	31.2	 16
617	  5	369.5	58.1	 16
618	  5	444.5	70.6	 16
619	  5	76.8	14.4	 16
620	  5	51.3	9.2	 16
621	  5	71.3	14.2	 16
622	  5	68.0	12.1	 16
623	  5	180.8	24.3	 16
624	  5	443.0	61.1	 16
625	  5	160.5	21.8	 16
626	  5	654.5	44.0	 16
627	  5	101.0	18.1	 16
628	  5	74.0	14.0	 16
629	  5	350.5	44.0	 16
630	  5	76.0	8.0	 16
631	  5	70.3	13.1	 16
632	  5	307.5	33.8	 16
633	  5	106.8	18.9	 16
634	  5	256.5	33.2	 16
635	  5	137.3	25.1	 16
636	  5	92.8	19.4	 16
637	  5	1528.5	111.7	 16
638	  5	417.0	45.3	 16
639	  5	111.8	19.2	 16
640	  5	221.8	30.6	 16
641	  5	73.3	15.1	 16
642	  5	59.0	13.7	 16
643	  5	181.8	28.4	 16
644	  5	275.3	39.4	 16
645	  5	275.3	39.9	 16
646	  5	116.3	26.0	 16
647	  5	55.3	6.8	 16
648	  5	1428.0	228.7	 16
649	  5	129.3	25.9	 12
650	  5	113.0	16.4	 16
651	  5	429.3	37.6	 16
652	  5	124.3	20.8	 16
653	  5	68.5	13.7	 16
654	  5	140.8	21.4	 16
655	  5	229.0	30.1	 16
656	  5	198.8	19.8	 16
657	  5	3053.5	204.4	 16
658	  5	82.3	24.2	 16
659	  5	552.0	80.8	 20
660	  5	320.5	51.7	 16
661	  5	1043.0	199.0	 16
662	  5	146.3	25.5	 16
663	  5	140.5	24.9	 16
664	  5	5255.0	1121.9	 16
665	  5	125.0	13.4	 16
666	  5	489.0	97.2	 16
667	  5	125.0	18.8	 16
668	  5	341.5	66.5	 16
669	  5	915.0	166.7	 16
670	  5	136.5	25.1	 16
671	  5	104.5	18.7	 16
672	  5	129.5	16.5	 16
673	  5	94.8	13.4	 16
674	  5	165.0	30.9	 16
675	  5	131.3	18.9	 16
676	  5	85.0	18.3	 16
677	  5	107.8	19.4	 16
678	  5	229.8	40.6	 16
679	  5	6149.0	1113.8	 16
680	  5	98.8	15.2	 16
681	  5	533.3	78.7	 16
682	  5	106.0	14.3	 16
683	  5	148.3	23.1	 16
684	  5	118.0	24.1	 16
685	  5	76.5	13.0	 16
686	  5	72.3	17.6	 16
687	  5	107.5	19.2	 16
688	  5	7390.0	1139.6	 16
689	  5	352.3	33.5	 16
690	  5	125.8	17.9	 16
691	  5	998.8	130.1	 16
692	  5	197.3	26.0	 16
693	  5	320.5	32.9	 16
694	  5	435.5	58.9	 16
695	  5	239.5	30.0	 16
696	  5	107.0	17.4	 16
697	  5	122.5	26.5	 16
698	  5	85.5	11.1	 16
699	  5	946.0	132.7	 16
700	  5	68.5	14.1	 16
701	  5	108.0	15.4	 16
702	  5	175.3	25.2	 16
703	  5	344.5	43.3	 16
704	  5	96.5	16.5	 16
705	  5	471.5	42.1	 16
706	  5	244.5	31.4	 16
707	  5	213.5	25.4	 16
708	  5	79.0	12.7	 16
709	  5	131.0	23.3	 16
710	  5	175.0	29.1	 16
711	  5	96.0	12.2	 16
  0	  6	9213.3	1005.7	 16
  1	  6	91.3	12.6	 16
  2	  6	69.8	10.8	 16
  3	  6	115.3	16.3	 16
  4	  6	65.5	8.9	 16
  5	  6	139.3	12.2	 16
  6	  6	389.8	33.7	 16
  7	  6	109.3	17.2	 16
  8	  6	101.0	13.5	 16
  9	  6	395.3	34.0	 16
 10	  6	200.5	20.0	 16
 11	  6	89.3	15.8	 16
 12	  6	7465.8	701.0	 16
 13	  6	124.5	20.5	 16
 14	  6	120.3	16.0	 16
 15	  6	123.5	14.4	 16
 16	  6	7676.8	925.4	 16
 17	  6	93.8	19.9	 16
 18	  6	129.5	20.1	 16
 19	  6	126.0	19.8	 16
 20	  6	126.8	12.3	 16
 21	  6	124.8	17.3	 16
 22	  6	131.5	18.7	 16
 23	  6	86.5	16.2	 16
 24	  6	136.8	23.3	 16
 25	  6	112.5	16.5	 16
 26	  6	134.0	21.3	 16
 27	  6	132.8	22.3	 16
 28	  6	120.8	16.2	 16
 29	  6	88.3	12.6	 16
 30	  6	125.3	9.9	 16
 31	  6	133.3	13.3	 16
 32	  6	128.0	18.2	 16
 33	  6	123.5	16.8	 16
 34	  6	109.0	13.7	 16
 35	  6	94.3	14.4	 16
 36	  6	7630.8	1460.5	 16
 37	  6	125.3	18.5	 16
 38	  6	114.3	9.0	 16
 39	  6	124.8	16.8	 16
 40	  6	7757.5	1615.6	 16
 41	  6	103.3	18.7	 16
 42	  6	8346.0	1505.2	 16
 43	  6	142.3	22.7	 16
 44	  6	127.0	19.8	 16
 45	  6	121.0	13.8	 16
 46	  6	112.5	17.6	 16
 47	  6	77.3	20.1	 16
 48	  6	110.0	12.7	 16
 49	  6	115.8	20.1	 16
 50	  6	102.0	13.4	 16
 51	  6	115.5	10.9	 16
 52	  6	124.5	16.5	 16
 53	  6	75.3	11.0	 16
 54	  6	108.3	13.4	 16
 55	  6	112.8	18.6	 16
 56	  6	109.0	17.2	 16
 57	  6	114.3	18.5	 16
 58	  6	113.8	14.0	 16
 59	  6	72.8	9.8	 16
 60	  6	75.0	10.9	 16
 61	  6	74.0	13.0	 16
 62	  6	8198.5	1209.5	 16
 63	  6	138.5	22.6	 16
 64	  6	125.5	19.3	 16
 65	  6	129.5	13.9	 16
 66	  6	6736.3	799.9	 16
 67	  6	103.5	179.1	 20
 68	  6	7636.5	2696.8	 16
 69	  6	121.3	17.5	 16
 70	  6	112.3	15.9	 16
 71	  6	188.5	157.4	 16
 72	  6	6634.0	2342.5	 16
 73	  6	82.3	18.9	 16
 74	  6	113.5	13.4	 16
 75	  6	123.3	18.7	 16
 76	  6	128.3	17.9	 16
 77	  6	127.5	17.0	 16
 78	  6	102.8	16.8	 16
 79	  6	115.5	68.2	 16
 80	  6	7322.0	2217.0	 16
 81	  6	107.3	11.6	 16
 82	  6	100.0	13.6	 16
 83	  6	142.5	37.5	 16
 84	  6	6707.3	1950.9	 16
 85	  6	76.3	13.5	 16
 86	  6	120.0	24.6	 16
 87	  6	7385.8	477.6	 16
 88	  6	7397.3	1852.6	 16
 89	  6	114.5	16.0	 16
 90	  6	106.0	11.6	 16
 91	  6	81.3	13.5	 16
 92	  6	6597.8	1352.2	 16
 93	  6	117.0	18.9	 16
 94	  6	121.3	15.7	 16
 95	  6	6489.5	1171.0	 16
 96	  6	114.5	18.8	 16
 97	  6	78.5	13.0	 16
 98	  6	7069.0	1170.5	 16
 99	  6	127.8	25.6	 16
100	  6	112.5	12.3	 16
101	  6	7099.3	1153.3	 16
102	  6	117.5	21.5	 16
103	  6	71.8	10.1	 16
104	  6	115.0	23.1	 16
105	  6	6989.5	991.1	 16
106	  6	129.3	13.6	 16
107	  6	7084.0	966.1	 16
108	  6	171.3	26.1	 16
109	  6	73.5	12.8	 16
110	  6	64.3	13.4	 16
111	  6	91.5	45.2	 16
112	  6	92.5	14.1	 16
113	  6	78.0	11.7	 16
114	  6	80.5	14.7	 16
115	  6	271.0	41.1	 16
116	  6	128.0	22.1	 16
117	  6	143.8	25.8	 16
118	  6	828.3	167.3	 16
119	  6	263.0	30.8	 16
120	  6	84.0	16.8	 16
121	  6	107.0	14.5	 16
122	  6	75.3	14.0	 16
123	  6	73.0	11.9	 16
124	  6	72.5	13.0	 16
125	  6	76.3	12.4	 16
126	  6	95.5	20.6	 16
127	  6	86.5	15.7	 16
128	  6	213.5	23.8	 16
129	  6	235.0	53.3	 16
130	  6	170.5	33.1	 16
131	  6	362.0	65.1	 16
132	  6	65.3	11.9	 16
133	  6	193.8	37.2	 16
134	  6	117.0	18.2	 16
135	  6	91.3	13.4	 16
136	  6	69.3	9.8	 16
137	  6	78.3	16.2	 16
138	  6	64.5	11.1	 16
139	  6	356.0	86.4	 16
140	  6	56.3	8.5	 16
141	  6	111.8	26.6	 16
142	  6	64.3	11.8	 16
143	  6	185.5	43.7	 16
144	  6	84.3	13.3	 16
145	  6	82.0	14.5	 16
146	  6	101.8	16.8	 16
147	  6	239.0	49.8	 16
148	  6	90.0	24.5	 16
149	  6	49.8	11.2	 16
150	  6	107.8	16.6	 16
151	  6	98.8	13.0	 16
152	  6	148.0	34.2	 16
153	  6	114.8	18.5	 16
154	  6	98.3	17.9	 16
155	  6	140.8	26.6	 16
156	  6	138.3	37.5	 16
157	  6	172.3	22.7	 16
158	  6	113.5	16.7	 16
159	  6	191.8	33.0	 16
160	  6	163.3	22.0	 16
161	  6	186.5	30.0	 16
162	  6	162.0	20.3	 16
163	  6	192.3	22.6	 16
164	  6	202.0	27.5	 16
165	  6	113.5	16.1	 16
166	  6	166.8	22.6	 16
167	  6	81.5	10.6	 16
168	  6	79.3	13.6	 16
169	  6	115.8	20.4	 16
170	  6	86.8	13.3	 16
171	  6	189.3	22.3	 16
172	  6	93.5	15.2	 16
173	  6	67.0	14.8	 16
174	  6	198.3	28.9	 16
175	  6	73.8	15.1	 16
176	  6	71.0	10.6	 16
177	  6	56.3	12.2	 16
178	  6	59.3	11.8	 16
179	  6	73.8	17.5	 16
180	  6	330.3	51.4	 16
181	  6	127.5	21.3	 16
182	  6	114.3	11.5	 16
183	  6	119.0	15.4	 16
184	  6	54.0	11.5	 16
185	  6	197.8	24.7	 16
186	  6	114.8	23.9	 20
187	  6	87.3	17.1	 16
188	  6	110.0	17.1	 16
189	  6	92.5	18.9	 16
190	  6	89.5	19.9	 16
191	  6	55.8	12.9	 16
192	  6	117.0	18.4	 16
193	  6	84.0	17.5	 16
194	  6	125.5	26.6	 16
195	  6	95.0	14.5	 16
196	  6	163.0	33.8	 16
197	  6	211.5	45.7	 16
198	  6	325.8	67.6	 16
199	  6	235.0	21.5	 16
200	  6	388.3	59.3	 16
201	  6	190.3	28.4	 16
202	  6	173.5	31.2	 16
203	  6	85.3	13.8	 16
204	  6	62.5	12.4	 16
205	  6	56.3	13.1	 16
206	  6	116.8	20.3	 16
207	  6	50.0	7.2	 16
208	  6	57.0	8.3	 16
209	  6	124.0	20.7	 16
210	  6	113.3	23.8	 16
211	  6	79.8	9.4	 16
212	  6	102.0	17.2	 16
213	  6	92.8	19.2	 16
214	  6	193.3	28.7	 16
215	  6	87.8	17.0	 16
216	  6	94.3	14.6	 16
217	  6	283.3	35.8	 16
218	  6	62.8	14.4	 16
219	  6	62.5	15.6	 16
220	  6	61.5	12.0	 16
221	  6	89.8	15.7	 16
222	  6	81.8	13.3	 16
223	  6	106.0	15.8	 16
224	  6	91.3	18.7	 16
225	  6	62.0	16.4	 16
226	  6	72.0	11.3	 16
227	  6	132.0	34.6	 16
228	  6	101.3	11.9	 16
229	  6	352.3	51.6	 16
230	  6	80.8	14.7	 16
231	  6	70.5	16.5	 16
232	  6	60.3	10.5	 16
233	  6	81.8	13.1	 16
234	  6	54.0	6.6	 16
235	  6	168.5	32.0	 16
236	  6	75.5	16.5	 16
237	  6	61.5	12.8	 16
238	  6	107.3	16.4	 16
239	  6	237.5	41.0	 16
240	  6	66.8	15.7	 16
241	  6	64.5	14.5	 16
242	  6	88.8	13.6	 16
243	  6	123.3	31.3	 16
244	  6	103.3	18.9	 16
245	  6	161.0	23.8	 16
246	  6	111.8	19.1	 16
247	  6	59.5	10.7	 16
248	  6	102.5	27.3	 16
249	  6	81.0	10.2	 16
250	  6	55.0	8.6	 16
251	  6	770.8	145.1	 16
252	  6	59.5	13.1	 16
253	  6	59.3	12.8	 16
254	  6	61.3	13.4	 16
255	  6	200.8	39.2	 16
256	  6	394.8	59.3	 16
257	  6	67.5	11.4	 16
258	  6	62.5	13.5	 16
259	  6	58.8	14.4	 16
260	  6	66.5	16.2	 16
261	  6	68.3	13.0	 16
262	  6	101.8	15.1	 16
263	  6	63.8	13.0	 16
264	  6	77.5	13.4	 16
265	  6	60.5	14.3	 16
266	  6	60.0	10.1	 16
267	  6	71.3	68.5	 16
268	  6	82.8	12.0	 16
269	  6	72.0	14.2	 16
270	  6	67.3	9.6	 16
271	  6	155.3	25.9	 16
272	  6	130.3	19.4	 16
273	  6	87.3	12.2	 16
274	  6	66.0	12.7	 16
275	  6	58.8	14.3	 16
276	  6	57.0	11.0	 16
277	  6	67.3	16.6	 16
278	  6	82.3	16.9	 16
279	  6	60.5	10.5	 16
280	  6	96.5	11.5	 16
281	  6	500.8	53.7	 16
282	  6	503.3	52.2	 16
283	  6	226.3	30.4	 16
284	  6	89.3	10.1	 16
285	  6	298.5	40.3	 16
286	  6	58.8	12.4	 16
287	  6	84.0	12.9	 16
288	  6	298.8	43.3	 16
289	  6	226.3	31.0	 16
290	  6	198.5	20.3	 16
291	  6	91.8	16.3	 16
292	  6	85.3	15.2	 16
293	  6	101.8	11.8	 16
294	  6	120.0	24.7	 16
295	  6	81.3	13.6	 16
296	  6	87.3	11.7	 16
297	  6	119.3	13.8	 16
298	  6	62.3	9.3	 16
299	  6	63.3	8.3	 16
300	  6	670.0	85.3	 16
301	  6	79.3	13.5	 16
302	  6	88.3	18.4	 16
303	  6	345.5	50.6	 16
304	  6	111.8	15.3	 16
305	  6	78.8	16.2	 20
306	  6	323.5	87.9	 16
307	  6	75.8	16.1	 16
308	  6	64.0	10.4	 16
309	  6	85.5	15.5	 16
310	  6	54.0	14.1	 16
311	  6	187.0	46.5	 16
312	  6	61.8	13.0	 16
313	  6	82.5	13.8	 16
314	  6	208.0	54.4	 12
315	  6	80.3	18.0	 16
316	  6	85.3	17.7	 16
317	  6	62.0	14.4	 16
318	  6	63.0	12.3	 16
319	  6	62.3	14.8	 16
320	  6	65.3	12.3	 16
321	  6	53.8	10.6	 16
322	  6	50.8	9.9	 16
323	  6	81.3	13.4	 16
324	  6	155.5	38.7	 16
325	  6	226.5	45.6	 16
326	  6	190.3	25.1	 16
327	  6	138.3	38.8	 16
328	  6	160.5	28.8	 16
329	  6	745.3	204.2	 16
330	  6	256.3	49.4	 16
331	  6	97.0	20.1	 16
332	  6	102.3	27.8	 16
333	  6	271.0	54.1	 16
334	  6	92.0	20.4	 16
335	  6	70.5	14.9	 16
336	  6	56.3	8.0	 16
337	  6	113.3	21.3	 16
338	  6	85.0	13.2	 16
339	  6	84.3	25.8	 16
340	  6	171.8	22.8	 16
341	  6	104.5	15.9	 16
342	  6	59.0	13.3	 16
343	  6	58.0	11.9	 16
344	  6	103.0	13.4	 16
345	  6	80.8	15.7	 16
346	  6	74.5	12.9	 16
347	  6	923.8	168.4	 16
348	  6	50.3	7.7	 16
349	  6	89.3	13.7	 16
350	  6	195.8	24.0	 16
351	  6	603.5	42.0	 16
352	  6	617.5	71.9	 16
353	  6	78.0	12.9	 16
354	  6	60.8	13.0	 16
355	  6	1106.3	159.5	 16
356	  6	63.5	13.3	 16
357	  6	87.0	11.4	 16
358	  6	82.0	12.8	 16
359	  6	91.3	14.2	 16
360	  6	72.0	14.2	 16
361	  6	208.3	34.8	 16
362	  6	223.5	48.2	 16
363	  6	57.3	12.1	 16
364	  6	55.5	12.5	 16
365	  6	55.0	11.3	 16
366	  6	48.3	13.8	 16
367	  6	219.0	29.7	 16
368	  6	83.3	17.3	 16
369	  6	76.8	14.4	 16
370	  6	82.5	14.5	 16
371	  6	386.0	52.4	 16
372	  6	120.0	16.6	 16
373	  6	120.8	17.9	 16
374	  6	54.8	10.0	 16
375	  6	58.8	11.0	 16
376	  6	67.5	18.4	 16
377	  6	84.3	12.3	 16
378	  6	86.3	12.1	 16
379	  6	127.0	20.1	 16
380	  6	151.5	16.6	 16
381	  6	127.5	20.4	 16
382	  6	208.0	34.8	 16
383	  6	460.0	43.9	 16
384	  6	62.0	10.1	 16
385	  6	98.5	14.7	 16
386	  6	95.5	17.0	 16
387	  6	139.3	23.2	 16
388	  6	142.3	29.1	 16
389	  6	528.0	69.7	 16
390	  6	95.3	16.2	 16
391	  6	74.0	12.6	 16
392	  6	248.3	32.8	 16
393	  6	72.0	13.8	 16
394	  6	76.8	8.6	 16
395	  6	55.0	9.6	 16
396	  6	101.5	17.7	 16
397	  6	135.8	24.4	 16
398	  6	259.0	52.8	 16
399	  6	73.3	16.5	 16
400	  6	158.8	22.0	 16
401	  6	134.0	17.6	 16
402	  6	68.5	10.9	 16
403	  6	54.0	7.7	 16
404	  6	110.3	15.9	 16
405	  6	55.3	11.5	 16
406	  6	85.5	13.5	 16
407	  6	166.0	22.2	 16
408	  6	153.0	20.0	 16
409	  6	85.5	15.9	 16
410	  6	189.3	37.6	 16
411	  6	175.3	17.9	 16
412	  6	75.3	9.8	 16
413	  6	85.8	16.7	 16
414	  6	102.3	15.9	 16
415	  6	1352.0	171.8	 16
416	  6	1394.5	174.7	 16
417	  6	99.3	16.7	 16
418	  6	147.5	23.3	 16
419	  6	265.5	25.9	 16
420	  6	71.5	11.6	 16
421	  6	63.3	8.6	 16
422	  6	62.3	12.7	 16
423	  6	59.0	12.1	 20
424	  6	63.8	12.8	 16
425	  6	127.0	21.7	 16
426	  6	74.0	12.8	 16
427	  6	57.5	15.3	 16
428	  6	68.0	10.3	 16
429	  6	97.5	14.2	 16
430	  6	75.0	10.6	 16
431	  6	76.5	13.2	 16
432	  6	208.5	36.6	 16
433	  6	135.5	27.1	 16
434	  6	97.3	21.5	 16
435	  6	71.0	16.4	 16
436	  6	54.3	9.0	 16
437	  6	72.3	10.3	 16
438	  6	67.0	10.9	 16
439	  6	222.8	33.0	 16
440	  6	120.5	20.0	 16
441	  6	116.5	24.0	 16
442	  6	267.3	47.3	 16
443	  6	126.0	20.6	 16
444	  6	129.8	22.8	 16
445	  6	120.8	14.4	 16
446	  6	101.5	12.3	 16
447	  6	53.0	5.9	 16
448	  6	949.3	242.7	 16
449	  6	228.3	49.5	 16
450	  6	230.8	28.9	 16
451	  6	238.5	53.8	 16
452	  6	140.0	21.4	 16
453	  6	104.8	17.4	 16
454	  6	513.0	127.8	 16
455	  6	68.0	11.3	 16
456	  6	65.0	11.8	 16
457	  6	103.8	20.7	 16
458	  6	328.5	59.1	 16
459	  6	115.3	14.9	 16
460	  6	69.0	14.1	 16
461	  6	126.0	18.9	 16
462	  6	74.5	13.9	 16
463	  6	145.8	24.4	 16
464	  6	1245.5	105.1	 16
465	  6	498.3	79.6	 16
466	  6	139.5	26.6	 16
467	  6	102.3	17.9	 16
468	  6	91.0	16.3	 16
469	  6	167.0	20.3	 16
470	  6	98.0	17.0	 16
471	  6	123.3	19.5	 16
472	  6	176.0	26.6	 16
473	  6	162.3	32.7	 16
474	  6	61.0	10.4	 16
475	  6	65.3	15.5	 16
476	  6	63.8	11.8	 16
477	  6	79.8	11.6	 16
478	  6	88.8	14.3	 16
479	  6	108.0	19.1	 16
480	  6	76.5	15.2	 16
481	  6	79.8	10.7	 16
482	  6	117.0	12.3	 16
483	  6	68.0	8.3	 16
484	  6	115.5	12.9	 16
485	  6	260.5	44.9	 16
486	  6	99.8	15.8	 16
487	  6	221.5	40.8	 16
488	  6	74.8	12.4	 16
489	  6	94.3	18.7	 16
490	  6	97.5	20.0	 16
491	  6	118.8	27.4	 16
492	  6	60.5	13.6	 16
493	  6	64.5	14.1	 16
494	  6	69.0	15.0	 16
495	  6	168.8	25.4	 16
496	  6	491.8	62.2	 16
497	  6	94.3	22.1	 16
498	  6	123.5	25.0	 16
499	  6	82.3	15.2	 16
500	  6	115.0	21.6	 16
501	  6	176.3	29.1	 16
502	  6	67.3	9.6	 16
503	  6	638.0	108.7	 16
504	  6	69.3	13.1	 16
505	  6	187.5	33.6	 16
506	  6	90.0	16.7	 16
507	  6	72.5	10.4	 16
508	  6	410.5	48.7	 16
509	  6	1884.8	299.1	 16
510	  6	96.3	15.3	 16
511	  6	144.5	19.9	 16
512	  6	66.8	12.4	 16
513	  6	62.5	9.0	 16
514	  6	60.0	12.7	 16
515	  6	68.0	15.5	 16
516	  6	67.5	12.3	 16
517	  6	158.5	27.8	 16
518	  6	84.0	11.0	 16
519	  6	77.5	16.0	 16
520	  6	76.0	15.0	 16
521	  6	219.8	27.7	 16
522	  6	88.3	15.7	 16
523	  6	313.0	32.5	 16
524	  6	635.3	109.5	 16
525	  6	63.0	17.0	 16
526	  6	930.5	154.0	 16
527	  6	82.8	10.2	 16
528	  6	76.3	12.6	 16
529	  6	199.5	32.6	 16
530	  6	126.5	25.0	 16
531	  6	155.3	21.9	 16
532	  6	156.3	18.0	 16
533	  6	128.5	22.9	 16
534	  6	101.3	18.7	 16
535	  6	190.3	30.0	 16
536	  6	612.3	60.3	 16
537	  6	121.0	19.8	 16
538	  6	3614.5	486.6	 16
539	  6	631.5	70.1	 16
540	  6	65.8	12.2	 16
541	  6	171.5	23.9	 16
542	  6	166.0	35.8	 20
543	  6	64.0	10.2	 16
544	  6	155.3	22.1	 16
545	  6	257.0	31.2	 16
546	  6	279.3	35.3	 16
547	  6	257.0	36.4	 16
548	  6	245.3	20.7	 16
549	  6	210.3	29.8	 16
550	  6	117.8	14.3	 16
551	  6	117.5	20.4	 16
552	  6	65.8	12.9	 16
553	  6	54.3	11.8	 16
554	  6	54.0	6.0	 16
555	  6	78.0	10.0	 16
556	  6	72.3	9.0	 16
557	  6	66.0	10.5	 16
558	  6	85.3	18.0	 16
559	  6	87.0	19.4	 16
560	  6	267.3	30.5	 16
561	  6	95.3	16.4	 16
562	  6	2966.0	549.0	 16
563	  6	112.0	23.2	 16
564	  6	100.5	17.4	 16
565	  6	115.8	23.2	 16
566	  6	476.3	94.5	 16
567	  6	224.8	48.9	 16
568	  6	78.0	11.4	 16
569	  6	129.8	20.8	 16
570	  6	674.0	120.3	 16
571	  6	79.3	11.8	 16
572	  6	135.8	33.6	 16
573	  6	84.3	16.0	 16
574	  6	107.8	19.8	 16
575	  6	73.0	10.1	 16
576	  6	79.0	14.4	 16
577	  6	62.3	13.0	 16
578	  6	59.8	6.8	 16
579	  6	817.5	101.3	 16
580	  6	167.3	23.7	 16
581	  6	420.8	42.9	 16
582	  6	498.0	58.9	 16
583	  6	253.5	25.6	 16
584	  6	154.0	25.0	 16
585	  6	182.3	27.1	 16
586	  6	142.3	23.3	 16
587	  6	136.0	16.7	 16
588	  6	70.0	12.6	 16
589	  6	66.5	9.5	 16
590	  6	71.0	14.3	 16
591	  6	61.3	11.1	 16
592	  6	357.8	63.9	 16
593	  6	215.5	20.8	 16
594	  6	127.3	13.0	 16
595	  6	76.3	14.0	 16
596	  6	75.0	11.6	 16
597	  6	103.0	17.0	 16
598	  6	103.5	14.3	 16
599	  6	51.5	10.2	 16
600	  6	80.8	12.4	 16
601	  6	101.8	19.1	 16
602	  6	149.3	23.6	 16
603	  6	63.0	12.4	 16
604	  6	71.0	12.3	 16
605	  6	48.3	8.1	 16
606	  6	63.0	11.0	 16
607	  6	64.3	8.7	 16
608	  6	58.3	14.1	 16
609	  6	137.5	23.7	 16
610	  6	59.5	10.9	 16
611	  6	60.3	11.4	 16
612	  6	84.3	16.0	 16
613	  6	78.0	13.1	 16
614	  6	170.3	29.8	 16
615	  6	65.3	8.3	 16
616	  6	88.0	12.9	 16
617	  6	105.5	17.3	 16
618	  6	88.3	20.2	 16
619	  6	55.0	10.9	 16
620	  6	66.3	9.6	 16
621	  6	54.5	12.9	 16
622	  6	68.0	10.6	 16
623	  6	146.5	22.7	 16
624	  6	132.3	21.6	 16
625	  6	98.8	21.1	 16
626	  6	1201.8	132.2	 16
627	  6	164.0	23.1	 16
628	  6	69.8	13.6	 16
629	  6	156.5	23.6	 16
630	  6	53.5	8.4	 16
631	  6	56.0	10.2	 16
632	  6	104.8	22.3	 16
633	  6	96.8	13.8	 16
634	  6	139.3	21.1	 16
635	  6	82.5	15.7	 16
636	  6	77.5	13.6	 16
637	  6	476.5	48.9	 16
638	  6	844.0	80.1	 16
639	  6	81.3	11.6	 16
640	  6	98.3	13.1	 16
641	  6	63.3	13.1	 16
642	  6	47.5	11.0	 16
643	  6	78.0	9.9	 16
644	  6	149.3	15.8	 16
645	  6	151.3	15.4	 16
646	  6	87.3	16.6	 16
647	  6	56.0	11.3	 16
648	  6	309.5	45.8	 16
649	  6	86.3	14.6	 16
650	  6	78.8	10.4	 16
651	  6	424.5	54.3	 16
652	  6	164.3	25.1	 16
653	  6	71.0	15.2	 16
654	  6	117.5	14.3	 16
655	  6	209.0	31.5	 16
656	  6	268.0	29.0	 16
657	  6	1227.8	157.5	 16
658	  6	83.5	14.5	 16
659	  6	316.8	26.5	 16
660	  6	172.0	31.3	 16
661	  6	200.0	34.7	 20
662	  6	80.0	12.9	 16
663	  6	81.3	15.5	 16
664	  6	2176.0	488.7	 16
665	  6	178.0	23.1	 16
666	  6	256.5	46.1	 16
667	  6	80.8	15.0	 16
668	  6	152.0	27.4	 16
669	  6	93.0	20.2	 16
670	  6	69.0	11.5	 16
671	  6	94.0	13.2	 16
672	  6	155.0	27.6	 16
673	  6	68.3	12.7	 16
674	  6	126.8	22.8	 16
675	  6	66.5	9.0	 16
676	  6	79.3	16.7	 16
677	  6	63.8	14.0	 16
678	  6	76.3	13.3	 16
679	  6	608.5	121.3	 16
680	  6	60.3	11.6	 16
681	  6	262.8	30.6	 16
682	  6	118.8	17.7	 16
683	  6	91.0	16.2	 16
684	  6	72.3	12.9	 16
685	  6	62.3	8.9	 16
686	  6	72.0	12.6	 16
687	  6	76.8	11.8	 16
688	  6	1879.8	228.6	 16
689	  6	243.5	40.5	 16
690	  6	184.3	23.4	 16
691	  6	370.0	80.3	 16
692	  6	131.3	27.3	 16
693	  6	184.8	20.9	 16
694	  6	107.8	26.4	 16
695	  6	150.5	25.8	 16
696	  6	148.3	20.4	 16
697	  6	139.0	21.9	 16
698	  6	68.0	9.4	 16
699	  6	124.0	21.6	 16
700	  6	61.5	11.1	 16
701	  6	106.0	16.7	 16
702	  6	110.5	14.7	 16
703	  6	161.8	25.1	 16
704	  6	87.3	17.1	 16
705	  6	188.0	29.4	 16
706	  6	195.0	26.3	 16
707	  6	190.3	21.6	 16
708	  6	74.5	17.4	 16
709	  6	95.3	12.4	 16
710	  6	139.3	13.5	 16
711	  6	7892.8	994.4	 16
  0	  7	110.5	19.1	 16
  1	  7	236.5	28.3	 16
  2	  7	137.5	22.2	 16
  3	  7	272.3	30.1	 16
  4	  7	88.5	7.8	 16
  5	  7	212.8	24.6	 16
  6	  7	82.8	13.8	 16
  7	  7	167.5	23.4	 16
  8	  7	631.0	63.8	 16
  9	  7	449.3	48.0	 16
 10	  7	202.0	28.9	 16
 11	  7	72.5	12.1	 16
 12	  7	7772.3	699.1	 16
 13	  7	121.0	20.7	 16
 14	  7	121.0	16.1	 16
 15	  7	117.3	20.7	 16
 16	  7	140.0	24.1	 16
 17	  7	97.8	13.1	 16
 18	  7	141.8	18.8	 16
 19	  7	7733.0	761.2	 16
 20	  7	7113.5	497.5	 16
 21	  7	6946.3	1763.8	 16
 22	  7	132.8	21.7	 16
 23	  7	91.0	13.6	 16
 24	  7	8118.8	1354.0	 16
 25	  7	144.5	16.4	 16
 26	  7	7191.5	1370.0	 16
 27	  7	7183.5	1609.8	 16
 28	  7	137.5	22.5	 16
 29	  7	90.8	9.7	 16
 30	  7	129.0	12.9	 16
 31	  7	7430.8	1081.6	 16
 32	  7	7349.8	1144.4	 16
 33	  7	7089.8	1640.7	 16
 34	  7	121.3	12.7	 16
 35	  7	96.5	16.4	 16
 36	  7	8305.8	1590.7	 16
 37	  7	125.3	24.4	 16
 38	  7	104.0	10.3	 16
 39	  7	114.8	15.5	 16
 40	  7	119.8	19.9	 16
 41	  7	88.0	13.1	 16
 42	  7	8657.0	1525.3	 16
 43	  7	141.0	23.9	 16
 44	  7	7469.5	600.6	 16
 45	  7	7003.0	1400.8	 16
 46	  7	138.5	24.3	 16
 47	  7	76.8	15.4	 16
 48	  7	118.0	20.0	 16
 49	  7	126.3	18.6	 16
 50	  7	6269.8	1107.2	 16
 51	  7	115.3	14.5	 16
 52	  7	115.8	21.8	 16
 53	  7	90.0	16.9	 16
 54	  7	7728.3	592.2	 16
 55	  7	7477.3	557.5	 16
 56	  7	6966.5	1244.5	 16
 57	  7	132.0	20.0	 16
 58	  7	99.3	11.6	 16
 59	  7	79.0	14.5	 16
 60	  7	80.3	12.6	 16
 61	  7	97.5	17.6	 16
 62	  7	8645.5	1225.3	 16
 63	  7	141.8	20.4	 16
 64	  7	138.5	18.5	 16
 65	  7	129.0	14.7	 16
 66	  7	7417.3	873.8	 16
 67	  7	87.5	12.0	 16
 68	  7	8490.5	976.9	 16
 69	  7	133.3	17.4	 20
 70	  7	110.3	12.9	 16
 71	  7	114.8	15.4	 16
 72	  7	119.3	21.9	 16
 73	  7	78.3	11.6	 16
 74	  7	115.0	18.6	 16
 75	  7	120.8	20.8	 16
 76	  7	117.8	12.1	 16
 77	  7	116.3	16.2	 16
 78	  7	105.3	12.7	 16
 79	  7	108.5	62.1	 16
 80	  7	7647.5	2390.4	 16
 81	  7	123.8	17.9	 16
 82	  7	113.3	19.2	 16
 83	  7	135.8	44.9	 16
 84	  7	7071.5	2080.2	 16
 85	  7	73.8	9.3	 16
 86	  7	102.8	15.0	 16
 87	  7	132.5	22.2	 16
 88	  7	7333.5	1823.4	 16
 89	  7	109.3	15.3	 16
 90	  7	102.3	19.0	 16
 91	  7	66.3	11.0	 16
 92	  7	115.5	19.2	 16
 93	  7	114.5	16.3	 16
 94	  7	127.5	15.9	 16
 95	  7	7076.3	1326.9	 16
 96	  7	107.8	22.2	 16
 97	  7	62.0	8.0	 16
 98	  7	108.8	12.6	 16
 99	  7	113.0	16.5	 16
100	  7	105.3	19.5	 16
101	  7	7328.8	1169.8	 16
102	  7	107.3	9.5	 16
103	  7	68.3	12.8	 16
104	  7	121.3	15.6	 16
105	  7	7618.5	957.7	 16
106	  7	149.0	22.8	 16
107	  7	7714.8	981.1	 16
108	  7	140.8	27.2	 16
109	  7	72.8	18.1	 16
110	  7	69.3	15.1	 16
111	  7	78.0	11.1	 16
112	  7	223.5	35.3	 16
113	  7	98.3	15.5	 16
114	  7	70.8	21.1	 16
115	  7	92.8	17.6	 16
116	  7	575.3	84.7	 16
117	  7	159.3	17.6	 16
118	  7	114.5	17.2	 16
119	  7	239.8	20.2	 16
120	  7	198.0	25.8	 16
121	  7	520.5	87.4	 16
122	  7	238.0	27.7	 16
123	  7	434.3	69.6	 16
124	  7	97.5	21.4	 16
125	  7	369.5	30.6	 16
126	  7	6143.5	339.4	 16
127	  7	6548.3	318.5	 16
128	  7	6526.3	957.9	 16
129	  7	203.0	33.9	 16
130	  7	106.3	28.1	 16
131	  7	2680.3	486.4	 16
132	  7	95.3	22.3	 16
133	  7	1697.0	264.9	 16
134	  7	745.0	36.5	 16
135	  7	365.3	80.0	 16
136	  7	312.5	31.8	 16
137	  7	121.3	22.6	 16
138	  7	94.3	16.2	 16
139	  7	177.8	36.5	 16
140	  7	64.5	13.0	 16
141	  7	67.0	10.7	 16
142	  7	93.3	15.5	 16
143	  7	324.5	69.4	 16
144	  7	154.0	32.2	 16
145	  7	775.3	178.4	 16
146	  7	72.3	15.6	 16
147	  7	92.5	17.6	 16
148	  7	99.3	20.0	 16
149	  7	90.3	15.4	 16
150	  7	73.3	11.6	 16
151	  7	102.3	17.8	 16
152	  7	222.5	46.7	 16
153	  7	261.5	44.8	 16
154	  7	180.3	28.0	 16
155	  7	120.3	30.7	 16
156	  7	938.8	62.8	 16
157	  7	990.3	86.7	 16
158	  7	172.3	27.9	 16
159	  7	177.5	22.8	 16
160	  7	135.3	23.5	 16
161	  7	140.5	18.7	 16
162	  7	90.3	13.7	 16
163	  7	109.0	24.9	 16
164	  7	136.3	22.9	 16
165	  7	193.0	14.7	 16
166	  7	67.3	11.8	 16
167	  7	164.3	23.7	 16
168	  7	84.3	10.9	 16
169	  7	240.3	30.2	 16
170	  7	359.3	45.6	 16
171	  7	368.0	33.6	 16
172	  7	67.3	15.0	 16
173	  7	83.3	16.2	 16
174	  7	1062.8	88.4	 16
175	  7	80.8	20.9	 16
176	  7	132.0	14.1	 16
177	  7	59.3	9.2	 16
178	  7	70.0	12.6	 16
179	  7	72.8	14.0	 16
180	  7	245.0	29.8	 16
181	  7	100.0	13.5	 16
182	  7	585.3	68.5	 16
183	  7	77.0	10.8	 16
184	  7	72.3	12.1	 16
185	  7	75.5	15.6	 16
186	  7	101.8	13.0	 16
187	  7	112.5	20.5	 20
188	  7	129.3	23.6	 16
189	  7	166.3	34.9	 16
190	  7	131.0	17.9	 16
191	  7	82.3	19.9	 16
192	  7	130.0	25.1	 16
193	  7	130.3	20.6	 16
194	  7	126.8	21.3	 16
195	  7	78.0	17.9	 16
196	  7	67.5	15.8	 16
197	  7	73.3	12.5	 16
198	  7	111.5	23.3	 16
199	  7	2188.8	561.0	 16
200	  7	332.5	72.8	 16
201	  7	107.5	18.7	 16
202	  7	99.5	14.5	 16
203	  7	161.3	28.2	 16
204	  7	231.3	49.1	 16
205	  7	63.5	10.6	 16
206	  7	193.8	30.1	 16
207	  7	86.3	22.4	 16
208	  7	125.0	17.9	 16
209	  7	68.5	11.3	 16
210	  7	75.5	14.4	 16
211	  7	93.3	13.4	 16
212	  7	168.3	37.4	 16
213	  7	223.8	31.4	 16
214	  7	245.3	43.9	 16
215	  7	209.8	35.8	 16
216	  7	148.8	28.0	 16
217	  7	239.8	45.5	 16
218	  7	122.3	22.8	 16
219	  7	65.8	10.8	 16
220	  7	180.0	35.7	 16
221	  7	144.0	20.2	 16
222	  7	873.8	170.4	 16
223	  7	116.5	22.1	 16
224	  7	74.3	15.0	 16
225	  7	136.3	24.6	 16
226	  7	251.0	41.2	 16
227	  7	154.3	24.4	 16
228	  7	137.8	20.9	 16
229	  7	74.8	17.1	 16
230	  7	86.3	30.2	 16
231	  7	972.3	178.3	 16
232	  7	108.0	27.7	 16
233	  7	89.3	10.7	 16
234	  7	65.0	10.3	 16
235	  7	86.3	14.8	 16
236	  7	289.5	46.4	 16
237	  7	64.0	11.0	 16
238	  7	59.5	12.6	 16
239	  7	793.3	96.1	 16
240	  7	69.8	12.8	 16
241	  7	96.5	18.9	 16
242	  7	415.8	70.8	 16
243	  7	306.3	41.5	 16
244	  7	585.8	89.9	 16
245	  7	71.3	13.2	 16
246	  7	61.3	11.2	 16
247	  7	92.5	11.7	 16
248	  7	105.8	19.1	 16
249	  7	107.5	21.9	 16
250	  7	58.0	9.4	 16
251	  7	105.8	19.4	 16
252	  7	330.8	43.2	 16
253	  7	64.3	10.4	 16
254	  7	182.3	24.3	 16
255	  7	78.3	16.0	 16
256	  7	57.5	9.1	 16
257	  7	80.8	15.7	 16
258	  7	54.3	9.6	 16
259	  7	149.0	18.9	 16
260	  7	162.5	20.3	 16
261	  7	181.8	31.2	 16
262	  7	75.5	10.2	 16
263	  7	3966.5	459.9	 16
264	  7	107.3	14.8	 16
265	  7	68.0	14.9	 16
266	  7	71.3	13.3	 16
267	  7	553.5	68.5	 16
268	  7	651.5	77.5	 16
269	  7	60.3	11.8	 16
270	  7	67.0	12.6	 16
271	  7	133.3	27.2	 16
272	  7	352.3	45.2	 16
273	  7	119.8	10.8	 16
274	  7	121.8	21.5	 16
275	  7	104.0	16.3	 16
276	  7	187.3	23.4	 16
277	  7	99.3	17.0	 16
278	  7	293.3	42.4	 16
279	  7	76.3	10.6	 16
280	  7	70.0	7.5	 16
281	  7	82.5	14.8	 16
282	  7	1829.8	173.2	 16
283	  7	89.0	18.2	 16
284	  7	150.0	30.1	 16
285	  7	135.0	19.0	 16
286	  7	80.5	10.5	 16
287	  7	760.5	119.5	 16
288	  7	190.8	25.1	 16
289	  7	177.0	20.8	 16
290	  7	142.8	19.7	 16
291	  7	371.0	66.5	 16
292	  7	62.0	10.0	 16
293	  7	168.3	24.7	 16
294	  7	127.3	14.8	 16
295	  7	96.3	10.3	 16
296	  7	80.3	12.2	 16
297	  7	78.3	14.6	 16
298	  7	184.0	19.1	 16
299	  7	194.3	24.8	 16
300	  7	179.0	25.9	 16
301	  7	839.3	98.4	 16
302	  7	61.0	11.9	 16
303	  7	183.3	21.6	 16
304	  7	85.5	12.3	 16
305	  7	60.3	13.3	 16
306	  7	1068.5	361.1	 20
307	  7	101.3	22.3	 16
308	  7	183.3	41.5	 16
309	  7	79.5	14.1	 16
310	  7	94.3	17.8	 16
311	  7	174.5	38.6	 16
312	  7	264.8	84.1	 16
313	  7	190.3	36.1	 16
314	  7	192.0	49.1	 16
315	  7	199.0	23.2	 16
316	  7	645.5	226.6	 16
317	  7	143.5	33.5	 16
318	  7	74.0	10.3	 16
319	  7	144.3	36.6	 16
320	  7	58.5	14.4	 16
321	  7	587.3	191.4	 16
322	  7	132.5	29.6	 16
323	  7	122.0	28.1	 16
324	  7	237.3	48.8	 16
325	  7	359.0	66.2	 16
326	  7	1453.5	448.8	 16
327	  7	187.3	37.8	 16
328	  7	74.3	20.3	 16
329	  7	174.8	20.1	 16
330	  7	665.5	184.7	 16
331	  7	114.5	17.0	 16
332	  7	140.8	50.8	 16
333	  7	6964.0	201.4	 16
334	  7	7256.8	1891.5	 16
335	  7	148.0	24.5	 16
336	  7	63.3	10.3	 16
337	  7	77.3	12.8	 16
338	  7	73.5	11.4	 16
339	  7	109.0	17.0	 16
340	  7	125.5	24.3	 16
341	  7	68.8	11.9	 16
342	  7	132.0	22.9	 16
343	  7	58.5	17.3	 16
344	  7	117.5	22.3	 16
345	  7	159.5	24.8	 16
346	  7	190.0	23.7	 16
347	  7	320.5	36.2	 16
348	  7	200.8	30.0	 16
349	  7	68.3	12.0	 16
350	  7	72.3	13.3	 16
351	  7	67.0	8.8	 16
352	  7	509.5	54.3	 16
353	  7	127.3	22.8	 16
354	  7	58.5	9.3	 16
355	  7	83.8	16.4	 16
356	  7	138.3	18.5	 16
357	  7	237.3	39.4	 16
358	  7	1699.5	199.5	 16
359	  7	181.3	21.6	 16
360	  7	262.5	36.9	 16
361	  7	79.0	14.6	 16
362	  7	102.5	17.1	 16
363	  7	82.5	10.0	 16
364	  7	54.0	10.6	 16
365	  7	76.8	13.1	 16
366	  7	198.8	24.5	 16
367	  7	200.5	34.2	 16
368	  7	99.8	24.4	 16
369	  7	118.3	23.0	 16
370	  7	228.5	34.8	 16
371	  7	248.8	34.9	 16
372	  7	300.3	25.8	 16
373	  7	149.0	18.6	 16
374	  7	286.3	41.3	 16
375	  7	48.3	12.1	 16
376	  7	95.3	15.8	 16
377	  7	80.3	13.6	 16
378	  7	149.0	27.1	 16
379	  7	706.5	104.5	 16
380	  7	419.0	64.4	 16
381	  7	187.3	22.6	 16
382	  7	154.5	26.5	 16
383	  7	1406.5	84.9	 16
384	  7	114.3	12.4	 16
385	  7	72.8	12.0	 16
386	  7	88.0	12.9	 16
387	  7	134.3	24.8	 16
388	  7	131.5	19.6	 16
389	  7	60.5	10.9	 16
390	  7	76.3	14.2	 16
391	  7	347.3	39.6	 16
392	  7	59.0	12.3	 16
393	  7	63.3	12.6	 16
394	  7	191.5	37.6	 16
395	  7	283.0	28.7	 16
396	  7	606.0	61.6	 16
397	  7	593.3	62.9	 16
398	  7	70.3	11.4	 16
399	  7	63.8	14.0	 16
400	  7	86.3	18.3	 16
401	  7	250.8	25.7	 16
402	  7	727.8	93.4	 16
403	  7	167.0	25.2	 16
404	  7	80.0	19.5	 16
405	  7	60.3	10.8	 16
406	  7	914.3	70.3	 16
407	  7	106.5	16.9	 16
408	  7	66.0	14.1	 16
409	  7	112.0	22.3	 16
410	  7	110.3	15.3	 16
411	  7	194.5	29.4	 16
412	  7	198.3	25.4	 16
413	  7	1013.3	102.3	 16
414	  7	63.5	9.7	 16
415	  7	214.3	26.3	 16
416	  7	88.0	11.9	 16
417	  7	167.0	26.9	 16
418	  7	596.3	37.4	 16
419	  7	56.8	10.9	 16
420	  7	56.0	11.9	 16
421	  7	54.8	10.9	 16
422	  7	64.0	10.2	 16
423	  7	124.5	17.9	 16
424	  7	497.0	52.7	 16
425	  7	139.8	23.8	 20
426	  7	347.0	57.7	 16
427	  7	422.5	97.3	 16
428	  7	208.3	51.0	 16
429	  7	67.3	12.2	 16
430	  7	57.0	10.9	 16
431	  7	77.5	17.6	 16
432	  7	232.3	49.3	 16
433	  7	67.3	9.1	 16
434	  7	156.5	31.7	 16
435	  7	141.5	26.4	 16
436	  7	178.5	32.0	 16
437	  7	88.5	16.3	 16
438	  7	153.5	37.9	 16
439	  7	69.5	17.0	 16
440	  7	91.3	18.1	 16
441	  7	272.0	60.5	 16
442	  7	109.8	12.8	 16
443	  7	273.5	62.6	 16
444	  7	176.5	37.2	 16
445	  7	89.0	17.8	 16
446	  7	171.0	19.5	 16
447	  7	279.0	23.2	 16
448	  7	719.3	170.1	 16
449	  7	232.0	48.2	 16
450	  7	338.5	47.7	 16
451	  7	89.5	19.6	 16
452	  7	224.5	33.3	 16
453	  7	345.8	55.8	 16
454	  7	524.0	63.9	 16
455	  7	222.8	34.1	 16
456	  7	180.5	39.5	 16
457	  7	53.8	10.3	 16
458	  7	76.0	15.4	 16
459	  7	172.0	31.4	 16
460	  7	520.3	115.9	 16
461	  7	83.3	12.5	 16
462	  7	846.5	196.6	 16
463	  7	66.3	13.7	 16
464	  7	62.5	7.4	 16
465	  7	57.0	11.7	 16
466	  7	168.8	34.6	 16
467	  7	157.5	30.1	 16
468	  7	84.8	17.0	 16
469	  7	67.8	13.2	 16
470	  7	197.0	37.6	 16
471	  7	126.0	20.3	 16
472	  7	83.0	14.7	 16
473	  7	89.8	14.2	 16
474	  7	51.3	6.2	 16
475	  7	156.3	32.8	 16
476	  7	56.8	11.4	 16
477	  7	186.5	39.8	 16
478	  7	51.5	6.8	 16
479	  7	88.0	13.8	 16
480	  7	56.0	8.7	 16
481	  7	74.8	15.9	 16
482	  7	396.5	88.0	 16
483	  7	489.5	72.0	 16
484	  7	116.0	17.1	 16
485	  7	117.3	15.8	 16
486	  7	151.0	24.7	 16
487	  7	171.0	25.7	 16
488	  7	243.0	20.4	 16
489	  7	76.8	15.5	 16
490	  7	102.5	23.7	 16
491	  7	70.0	12.6	 16
492	  7	82.0	14.5	 16
493	  7	173.0	28.5	 16
494	  7	146.5	21.3	 16
495	  7	513.3	85.4	 16
496	  7	71.5	11.9	 16
497	  7	116.0	17.1	 16
498	  7	94.0	17.9	 16
499	  7	351.5	66.5	 16
500	  7	157.3	33.4	 16
501	  7	101.3	14.7	 16
502	  7	588.0	96.2	 16
503	  7	634.8	85.0	 16
504	  7	162.3	28.6	 16
505	  7	363.3	61.0	 16
506	  7	176.5	24.8	 16
507	  7	198.3	30.6	 16
508	  7	97.5	13.1	 16
509	  7	137.5	19.5	 16
510	  7	115.3	19.0	 16
511	  7	193.5	24.3	 16
512	  7	80.3	8.2	 16
513	  7	59.0	7.1	 16
514	  7	62.3	10.8	 16
515	  7	62.0	10.8	 16
516	  7	59.3	9.2	 16
517	  7	767.0	59.6	 16
518	  7	140.3	19.6	 16
519	  7	110.5	14.9	 16
520	  7	94.3	20.6	 16
521	  7	106.0	15.8	 16
522	  7	132.3	26.1	 16
523	  7	92.5	11.5	 16
524	  7	177.5	16.8	 16
525	  7	79.0	12.6	 16
526	  7	43.0	9.1	 16
527	  7	61.0	9.0	 16
528	  7	73.8	11.4	 16
529	  7	238.0	24.0	 16
530	  7	125.5	14.2	 16
531	  7	91.8	19.3	 16
532	  7	197.5	27.1	 16
533	  7	69.3	13.1	 16
534	  7	101.3	22.2	 16
535	  7	90.3	14.0	 16
536	  7	516.0	65.3	 16
537	  7	251.0	24.6	 16
538	  7	360.5	52.3	 16
539	  7	1806.8	97.7	 16
540	  7	350.5	45.6	 16
541	  7	83.0	18.2	 16
542	  7	80.3	8.2	 16
543	  7	56.3	9.2	 16
544	  7	76.5	13.5	 20
545	  7	77.5	14.1	 16
546	  7	233.5	41.9	 16
547	  7	332.3	76.0	 16
548	  7	310.0	46.7	 16
549	  7	238.0	36.0	 16
550	  7	63.0	13.6	 16
551	  7	117.0	22.6	 16
552	  7	196.0	37.0	 16
553	  7	84.3	15.1	 16
554	  7	217.3	48.4	 16
555	  7	59.0	7.6	 16
556	  7	63.0	12.6	 16
557	  7	114.5	25.8	 16
558	  7	234.3	41.1	 16
559	  7	529.5	92.6	 16
560	  7	56.5	13.4	 16
561	  7	103.3	19.5	 16
562	  7	279.0	37.1	 16
563	  7	585.3	103.1	 16
564	  7	114.0	20.8	 16
565	  7	284.5	51.2	 16
566	  7	63.0	12.4	 16
567	  7	62.8	10.5	 16
568	  7	354.3	61.5	 16
569	  7	160.5	28.3	 16
570	  7	80.0	18.7	 16
571	  7	100.3	14.9	 16
572	  7	100.5	19.6	 16
573	  7	114.3	25.5	 16
574	  7	111.5	18.0	 16
575	  7	442.0	59.9	 16
576	  7	76.3	14.2	 16
577	  7	624.0	74.0	 16
578	  7	80.0	12.1	 16
579	  7	81.0	11.4	 16
580	  7	156.3	16.5	 16
581	  7	126.3	17.5	 16
582	  7	402.5	49.6	 16
583	  7	64.3	11.0	 16
584	  7	199.8	32.0	 16
585	  7	283.8	38.6	 16
586	  7	88.3	12.8	 16
587	  7	81.3	13.1	 16
588	  7	91.0	13.6	 16
589	  7	125.3	21.7	 16
590	  7	137.0	22.2	 16
591	  7	72.0	12.4	 16
592	  7	2129.8	219.0	 16
593	  7	1364.5	105.9	 16
594	  7	70.8	17.7	 16
595	  7	64.5	13.1	 16
596	  7	122.8	17.7	 16
597	  7	62.3	8.1	 16
598	  7	304.3	47.4	 16
599	  7	57.5	12.8	 16
600	  7	56.3	11.9	 16
601	  7	59.3	8.9	 16
602	  7	66.3	11.6	 16
603	  7	90.8	26.4	 16
604	  7	783.0	106.2	 16
605	  7	73.5	12.1	 16
606	  7	183.5	39.3	 16
607	  7	123.3	19.8	 16
608	  7	53.8	7.2	 16
609	  7	248.5	36.6	 16
610	  7	525.5	83.8	 16
611	  7	1777.3	179.9	 16
612	  7	149.0	22.6	 16
613	  7	126.5	14.8	 16
614	  7	100.8	17.7	 16
615	  7	122.5	21.8	 16
616	  7	77.8	10.6	 16
617	  7	243.0	35.4	 16
618	  7	65.0	9.4	 16
619	  7	182.3	21.3	 16
620	  7	368.0	48.0	 16
621	  7	658.0	52.7	 16
622	  7	132.5	14.8	 16
623	  7	125.5	16.0	 16
624	  7	62.3	10.6	 16
625	  7	707.3	81.0	 16
626	  7	97.5	10.3	 16
627	  7	487.3	42.2	 16
628	  7	319.5	32.7	 16
629	  7	77.5	13.5	 16
630	  7	268.8	34.4	 16
631	  7	471.0	48.2	 16
632	  7	226.5	26.4	 16
633	  7	251.3	30.6	 16
634	  7	133.5	25.7	 16
635	  7	230.3	30.1	 16
636	  7	197.3	26.6	 16
637	  7	981.3	117.2	 16
638	  7	77.8	17.0	 16
639	  7	359.5	52.9	 16
640	  7	58.0	11.5	 16
641	  7	157.3	31.9	 16
642	  7	337.3	56.9	 16
643	  7	69.0	13.4	 16
644	  7	360.3	35.6	 16
645	  7	88.3	13.2	 16
646	  7	193.5	21.2	 16
647	  7	371.8	58.5	 16
648	  7	327.8	47.8	 16
649	  7	1464.0	208.5	 16
650	  7	84.3	13.7	 16
651	  7	124.0	21.6	 16
652	  7	148.3	26.2	 16
653	  7	225.8	34.0	 16
654	  7	195.3	32.7	 16
655	  7	179.8	29.6	 16
656	  7	64.3	16.5	 16
657	  7	114.3	21.4	 16
658	  7	127.5	20.0	 16
659	  7	1092.0	110.6	 16
660	  7	118.8	18.1	 16
661	  7	251.8	26.5	 16
662	  7	99.0	18.6	 20
663	  7	364.3	64.0	 16
664	  7	377.0	65.9	 16
665	  7	239.0	29.3	 16
666	  7	182.8	32.3	 16
667	  7	251.5	27.3	 16
668	  7	709.3	119.5	 16
669	  7	242.3	34.9	 16
670	  7	577.3	124.0	 16
671	  7	81.3	12.9	 16
672	  7	74.3	11.5	 16
673	  7	64.3	15.1	 16
674	  7	89.5	16.7	 16
675	  7	81.0	14.1	 16
676	  7	1497.8	334.0	 16
677	  7	68.0	11.5	 16
678	  7	601.5	103.8	 16
679	  7	307.8	63.1	 16
680	  7	160.5	25.2	 16
681	  7	244.5	18.3	 16
682	  7	110.0	16.0	 16
683	  7	230.0	28.6	 16
684	  7	181.3	29.8	 16
685	  7	213.8	30.5	 16
686	  7	262.5	37.3	 16
687	  7	4764.0	845.8	 16
688	  7	214.3	27.1	 16
689	  7	150.0	18.4	 16
690	  7	114.3	17.0	 16
691	  7	146.5	23.8	 12
692	  7	202.3	30.1	 16
693	  7	675.0	91.7	 16
694	  7	107.3	24.2	 16
695	  7	84.0	12.0	 16
696	  7	61.3	10.3	 16
697	  7	65.5	12.3	 16
698	  7	120.0	29.0	 16
699	  7	439.8	56.9	 16
700	  7	126.0	12.9	 16
701	  7	119.8	18.7	 16
702	  7	117.3	21.0	 16
703	  7	80.8	16.7	 16
704	  7	87.5	16.6	 16
705	  7	88.0	11.9	 16
706	  7	265.5	24.1	 16
707	  7	255.8	20.7	 16
708	  7	95.3	17.6	 16
709	  7	210.3	29.6	 16
710	  7	221.5	25.3	 16
711	  7	118.5	22.8	 16
  0	  8	8778.3	1092.9	 16
  1	  8	119.8	19.8	 16
  2	  8	128.3	23.1	 16
  3	  8	218.5	24.2	 16
  4	  8	73.5	11.0	 16
  5	  8	81.5	14.1	 16
  6	  8	75.0	15.9	 16
  7	  8	78.0	13.8	 16
  8	  8	184.3	28.2	 16
  9	  8	491.8	50.7	 16
 10	  8	164.3	18.8	 16
 11	  8	76.5	11.2	 16
 12	  8	7888.8	674.8	 16
 13	  8	132.0	19.2	 16
 14	  8	134.5	21.7	 16
 15	  8	7313.3	539.6	 16
 16	  8	8038.8	1119.6	 16
 17	  8	106.8	20.8	 16
 18	  8	8782.3	1226.5	 16
 19	  8	154.3	17.3	 16
 20	  8	143.8	19.7	 16
 21	  8	150.5	13.3	 16
 22	  8	8009.3	1907.5	 16
 23	  8	105.5	20.8	 16
 24	  8	9044.5	316.7	 16
 25	  8	8218.3	1944.6	 16
 26	  8	132.8	22.7	 16
 27	  8	139.0	26.0	 16
 28	  8	7977.3	1474.2	 16
 29	  8	97.0	18.0	 16
 30	  8	8527.5	1562.9	 16
 31	  8	144.3	26.2	 16
 32	  8	138.5	16.3	 16
 33	  8	143.8	18.2	 16
 34	  8	7785.3	1793.5	 16
 35	  8	92.8	13.5	 16
 36	  8	8673.8	1737.0	 16
 37	  8	131.3	16.6	 16
 38	  8	108.5	14.2	 16
 39	  8	109.0	12.9	 16
 40	  8	106.0	13.7	 16
 41	  8	89.3	13.8	 16
 42	  8	8860.8	230.8	 16
 43	  8	8274.5	1651.3	 16
 44	  8	121.0	17.2	 16
 45	  8	126.3	19.8	 16
 46	  8	7748.8	1427.8	 16
 47	  8	75.5	12.1	 16
 48	  8	107.5	19.8	 16
 49	  8	110.0	14.0	 16
 50	  8	116.3	14.8	 16
 51	  8	122.3	17.0	 16
 52	  8	120.3	16.3	 16
 53	  8	79.8	16.5	 16
 54	  8	8346.8	1297.0	 16
 55	  8	141.0	21.8	 16
 56	  8	130.3	19.5	 16
 57	  8	6956.0	1074.3	 16
 58	  8	110.3	12.9	 16
 59	  8	79.0	13.5	 16
 60	  8	79.3	15.1	 16
 61	  8	102.5	16.1	 16
 62	  8	9132.8	241.4	 16
 63	  8	8273.3	1740.8	 16
 64	  8	7408.8	1478.4	 16
 65	  8	7380.8	1352.6	 16
 66	  8	7989.0	906.6	 16
 67	  8	112.3	20.9	 16
 68	  8	8838.0	971.0	 16
 69	  8	120.5	17.6	 16
 70	  8	137.5	131.9	 20
 71	  8	6736.8	1035.6	 16
 72	  8	7523.5	2684.6	 16
 73	  8	92.0	17.4	 16
 74	  8	182.3	122.8	 16
 75	  8	6762.3	859.0	 16
 76	  8	6402.0	761.0	 16
 77	  8	5835.8	1937.9	 16
 78	  8	113.3	17.6	 16
 79	  8	111.8	71.9	 16
 80	  8	7873.3	2442.5	 16
 81	  8	116.5	23.3	 16
 82	  8	105.5	14.5	 16
 83	  8	132.5	40.9	 16
 84	  8	6830.3	2000.6	 16
 85	  8	83.5	14.5	 16
 86	  8	108.3	14.5	 16
 87	  8	150.0	32.1	 16
 88	  8	7043.3	1738.0	 16
 89	  8	121.0	17.6	 16
 90	  8	91.3	9.8	 16
 91	  8	65.5	8.4	 16
 92	  8	111.5	20.6	 16
 93	  8	7077.3	331.9	 16
 94	  8	6914.8	1367.6	 16
 95	  8	114.5	17.6	 16
 96	  8	94.0	15.1	 16
 97	  8	63.8	7.7	 16
 98	  8	128.5	22.5	 16
 99	  8	7247.3	299.0	 16
100	  8	7119.0	1116.7	 16
101	  8	123.0	19.4	 16
102	  8	103.0	13.3	 16
103	  8	72.5	10.2	 16
104	  8	116.0	20.5	 16
105	  8	7829.8	1797.9	 16
106	  8	8071.0	1712.5	 16
107	  8	7827.3	1870.6	 16
108	  8	128.0	24.5	 16
109	  8	66.3	10.2	 16
110	  8	59.8	7.5	 16
111	  8	63.3	6.4	 16
112	  8	90.3	14.0	 16
113	  8	158.8	29.7	 16
114	  8	73.5	12.0	 16
115	  8	68.5	9.6	 16
116	  8	167.8	22.1	 16
117	  8	133.3	20.0	 16
118	  8	105.3	18.7	 16
119	  8	171.0	18.0	 16
120	  8	188.8	21.1	 16
121	  8	275.3	22.9	 16
122	  8	189.5	23.1	 16
123	  8	114.0	17.9	 16
124	  8	110.8	39.9	 16
125	  8	587.0	46.9	 16
126	  8	1206.8	174.0	 16
127	  8	1382.5	168.6	 16
128	  8	1304.0	235.4	 16
129	  8	88.3	17.4	 16
130	  8	74.3	16.4	 16
131	  8	593.3	109.4	 16
132	  8	64.3	10.8	 16
133	  8	222.5	50.3	 16
134	  8	2400.5	405.8	 16
135	  8	577.5	43.7	 16
136	  8	232.5	34.8	 16
137	  8	118.3	22.6	 16
138	  8	116.0	16.3	 16
139	  8	82.0	12.5	 16
140	  8	56.0	9.4	 16
141	  8	79.5	12.9	 16
142	  8	106.0	17.3	 16
143	  8	100.5	18.2	 16
144	  8	91.0	18.0	 16
145	  8	169.0	40.1	 16
146	  8	66.0	11.2	 16
147	  8	84.5	12.2	 16
148	  8	65.3	12.1	 16
149	  8	68.0	15.3	 16
150	  8	66.5	11.7	 16
151	  8	92.8	10.4	 16
152	  8	125.0	23.9	 16
153	  8	120.8	19.2	 16
154	  8	115.5	23.9	 16
155	  8	80.0	18.0	 16
156	  8	526.8	69.9	 16
157	  8	542.5	55.5	 16
158	  8	128.5	14.8	 16
159	  8	224.3	35.6	 16
160	  8	141.8	31.6	 16
161	  8	75.5	12.1	 16
162	  8	184.5	21.7	 16
163	  8	107.3	17.1	 16
164	  8	98.5	18.3	 16
165	  8	115.3	14.5	 16
166	  8	70.5	12.8	 16
167	  8	73.0	13.8	 16
168	  8	76.3	11.9	 16
169	  8	85.3	20.1	 16
170	  8	73.0	11.5	 16
171	  8	82.5	12.2	 16
172	  8	59.3	8.1	 16
173	  8	65.0	14.8	 16
174	  8	121.0	17.8	 16
175	  8	78.5	12.4	 16
176	  8	63.5	15.2	 16
177	  8	69.3	13.4	 16
178	  8	90.3	62.3	 16
179	  8	84.8	10.3	 16
180	  8	259.5	29.4	 16
181	  8	86.5	16.0	 16
182	  8	122.0	16.0	 16
183	  8	71.3	14.0	 16
184	  8	64.3	10.1	 16
185	  8	80.3	13.2	 16
186	  8	125.0	20.8	 16
187	  8	62.3	11.0	 16
188	  8	87.3	18.4	 16
189	  8	150.3	20.0	 20
190	  8	95.3	33.1	 16
191	  8	74.0	13.3	 16
192	  8	76.3	12.4	 16
193	  8	79.3	17.4	 16
194	  8	119.5	20.1	 16
195	  8	76.3	10.2	 16
196	  8	79.0	12.2	 16
197	  8	69.0	13.1	 16
198	  8	86.0	14.5	 16
199	  8	291.8	71.1	 16
200	  8	167.5	33.5	 16
201	  8	70.5	12.7	 16
202	  8	86.5	20.5	 16
203	  8	100.0	17.1	 16
204	  8	115.5	18.5	 16
205	  8	61.8	17.6	 16
206	  8	90.3	16.5	 16
207	  8	67.5	9.4	 16
208	  8	71.3	10.1	 16
209	  8	67.3	12.8	 16
210	  8	69.8	14.7	 16
211	  8	165.5	30.9	 16
212	  8	71.5	16.3	 16
213	  8	111.3	13.7	 16
214	  8	111.5	20.7	 16
215	  8	76.8	15.2	 16
216	  8	79.3	18.3	 16
217	  8	98.0	21.3	 16
218	  8	81.0	11.9	 16
219	  8	61.5	10.1	 16
220	  8	86.8	11.6	 16
221	  8	102.3	15.0	 16
222	  8	79.0	12.2	 16
223	  8	65.8	8.7	 16
224	  8	69.5	10.6	 16
225	  8	158.5	28.0	 16
226	  8	195.8	27.1	 16
227	  8	134.8	23.4	 16
228	  8	142.3	27.0	 16
229	  8	51.3	11.1	 16
230	  8	71.0	17.8	 16
231	  8	89.8	16.6	 16
232	  8	70.5	13.4	 16
233	  8	87.5	13.3	 16
234	  8	63.5	9.6	 16
235	  8	85.5	17.1	 16
236	  8	125.5	47.7	 16
237	  8	63.3	7.0	 16
238	  8	68.0	13.7	 16
239	  8	283.5	67.8	 16
240	  8	65.0	9.4	 16
241	  8	88.8	15.2	 16
242	  8	188.0	21.9	 16
243	  8	123.5	23.9	 16
244	  8	79.0	11.5	 16
245	  8	65.3	13.3	 16
246	  8	58.3	11.1	 16
247	  8	78.5	19.0	 16
248	  8	66.3	6.9	 16
249	  8	74.5	10.6	 16
250	  8	71.8	12.1	 16
251	  8	180.8	32.8	 16
252	  8	215.5	31.1	 16
253	  8	69.0	13.3	 16
254	  8	66.3	12.2	 16
255	  8	73.3	15.7	 16
256	  8	63.0	9.6	 16
257	  8	133.0	18.2	 16
258	  8	53.3	8.2	 16
259	  8	109.3	18.7	 16
260	  8	93.3	17.8	 16
261	  8	160.5	25.4	 16
262	  8	86.5	16.2	 16
263	  8	1444.3	170.1	 16
264	  8	77.3	11.4	 16
265	  8	68.8	14.7	 16
266	  8	59.0	7.1	 16
267	  8	150.0	28.9	 16
268	  8	225.0	28.3	 16
269	  8	56.5	8.6	 16
270	  8	74.8	13.5	 16
271	  8	183.3	24.3	 16
272	  8	201.8	29.2	 16
273	  8	57.3	9.1	 16
274	  8	80.5	20.1	 16
275	  8	89.5	17.1	 16
276	  8	239.5	40.4	 16
277	  8	104.3	17.3	 16
278	  8	120.5	21.2	 16
279	  8	65.3	9.5	 16
280	  8	62.0	9.9	 16
281	  8	94.8	15.6	 16
282	  8	471.8	80.9	 16
283	  8	134.3	25.1	 16
284	  8	60.5	10.1	 16
285	  8	58.8	9.3	 16
286	  8	78.0	13.8	 16
287	  8	104.5	14.4	 16
288	  8	100.3	16.8	 16
289	  8	206.5	27.4	 16
290	  8	176.0	33.4	 16
291	  8	101.8	24.3	 16
292	  8	63.5	13.9	 16
293	  8	142.5	18.3	 16
294	  8	97.8	16.6	 16
295	  8	95.0	20.1	 16
296	  8	97.0	10.3	 16
297	  8	74.8	17.1	 16
298	  8	181.8	26.4	 16
299	  8	157.8	27.7	 16
300	  8	221.5	31.7	 16
301	  8	156.8	19.0	 16
302	  8	56.3	9.4	 16
303	  8	83.3	16.5	 16
304	  8	71.5	15.8	 16
305	  8	76.3	14.6	 16
306	  8	332.5	50.9	 16
307	  8	84.5	19.6	 20
308	  8	93.5	13.1	 16
309	  8	83.3	15.3	 16
310	  8	118.0	25.6	 16
311	  8	170.5	43.3	 16
312	  8	108.3	11.2	 16
313	  8	226.3	24.5	 16
314	  8	180.3	48.9	 16
315	  8	123.8	20.6	 16
316	  8	151.3	37.0	 16
317	  8	81.3	14.3	 16
318	  8	56.3	13.0	 16
319	  8	61.0	8.1	 16
320	  8	58.0	12.5	 16
321	  8	165.3	22.8	 16
322	  8	87.3	16.3	 16
323	  8	75.0	11.3	 16
324	  8	147.3	22.5	 16
325	  8	219.0	39.8	 16
326	  8	694.5	194.3	 16
327	  8	122.8	17.5	 16
328	  8	107.0	34.8	 16
329	  8	163.8	29.7	 16
330	  8	581.0	155.9	 16
331	  8	139.5	23.2	 16
332	  8	91.3	17.4	 16
333	  8	2168.0	152.6	 16
334	  8	2171.3	571.3	 16
335	  8	94.5	13.0	 16
336	  8	72.3	16.0	 16
337	  8	65.8	11.7	 16
338	  8	56.5	12.1	 16
339	  8	67.3	13.3	 16
340	  8	112.3	19.1	 16
341	  8	65.3	11.3	 16
342	  8	77.0	15.5	 16
343	  8	55.8	9.8	 16
344	  8	80.8	14.0	 16
345	  8	89.3	18.9	 16
346	  8	179.8	45.1	 16
347	  8	540.8	67.7	 16
348	  8	167.3	19.1	 16
349	  8	77.0	17.5	 16
350	  8	83.5	15.1	 16
351	  8	63.5	11.4	 16
352	  8	157.0	24.0	 16
353	  8	66.0	12.2	 16
354	  8	65.5	13.8	 16
355	  8	139.0	15.9	 16
356	  8	119.5	13.0	 12
357	  8	157.8	19.3	 16
358	  8	937.8	123.7	 16
359	  8	153.3	16.2	 16
360	  8	97.0	16.5	 16
361	  8	56.8	13.0	 16
362	  8	72.8	14.6	 16
363	  8	77.0	17.0	 16
364	  8	54.3	9.2	 16
365	  8	64.5	14.0	 16
366	  8	134.3	21.6	 16
367	  8	109.8	17.7	 16
368	  8	82.0	16.0	 16
369	  8	127.3	21.2	 16
370	  8	116.3	20.1	 16
371	  8	109.5	17.8	 16
372	  8	168.5	31.7	 16
373	  8	148.5	25.8	 16
374	  8	73.8	10.7	 16
375	  8	59.0	11.5	 16
376	  8	61.5	16.7	 16
377	  8	78.0	15.2	 16
378	  8	200.3	29.0	 16
379	  8	190.0	32.0	 16
380	  8	137.3	21.5	 16
381	  8	70.5	13.7	 16
382	  8	70.8	10.6	 16
383	  8	770.8	76.0	 16
384	  8	117.8	17.8	 16
385	  8	72.3	11.9	 16
386	  8	85.0	18.6	 16
387	  8	166.5	21.0	 16
388	  8	179.0	28.8	 16
389	  8	64.3	13.3	 16
390	  8	59.3	12.1	 16
391	  8	65.3	15.3	 16
392	  8	53.3	13.4	 16
393	  8	58.0	9.2	 16
394	  8	169.0	27.2	 16
395	  8	224.0	26.6	 16
396	  8	304.0	38.8	 16
397	  8	325.5	55.5	 16
398	  8	52.0	12.5	 16
399	  8	60.3	9.0	 16
400	  8	85.8	16.0	 16
401	  8	409.8	56.1	 16
402	  8	92.0	22.0	 16
403	  8	71.3	11.7	 16
404	  8	70.8	18.7	 16
405	  8	47.0	9.1	 16
406	  8	164.0	33.3	 16
407	  8	62.0	15.2	 16
408	  8	64.3	12.0	 16
409	  8	89.5	11.1	 16
410	  8	82.0	11.5	 16
411	  8	195.0	30.1	 16
412	  8	128.8	20.4	 16
413	  8	176.0	22.8	 16
414	  8	47.5	6.3	 16
415	  8	145.8	21.7	 16
416	  8	69.3	17.6	 16
417	  8	66.8	15.6	 16
418	  8	117.3	19.5	 16
419	  8	51.8	11.0	 16
420	  8	50.5	12.6	 16
421	  8	59.3	7.5	 16
422	  8	57.5	9.4	 16
423	  8	89.3	15.6	 16
424	  8	456.3	36.7	 16
425	  8	94.8	17.1	 16
426	  8	436.0	65.8	 20
427	  8	76.8	12.1	 16
428	  8	73.0	10.0	 16
429	  8	78.5	17.6	 16
430	  8	82.0	16.7	 16
431	  8	73.8	15.3	 16
432	  8	76.0	15.3	 16
433	  8	51.0	8.7	 16
434	  8	102.0	18.7	 16
435	  8	93.8	18.2	 16
436	  8	97.5	13.5	 16
437	  8	119.3	15.3	 16
438	  8	169.5	34.1	 16
439	  8	69.3	10.5	 16
440	  8	82.3	14.3	 16
441	  8	73.3	14.2	 16
442	  8	63.8	11.6	 16
443	  8	128.0	23.4	 16
444	  8	83.8	21.0	 16
445	  8	62.5	13.7	 16
446	  8	96.3	19.8	 16
447	  8	107.8	19.1	 16
448	  8	340.0	124.8	 16
449	  8	1405.0	299.4	 16
450	  8	185.8	25.9	 16
451	  8	63.5	16.9	 16
452	  8	153.3	25.1	 16
453	  8	131.5	21.0	 16
454	  8	267.8	39.8	 16
455	  8	111.8	12.5	 16
456	  8	96.3	11.8	 16
457	  8	59.3	11.6	 16
458	  8	68.5	11.9	 16
459	  8	72.3	13.0	 16
460	  8	206.0	47.9	 16
461	  8	59.5	18.7	 16
462	  8	110.8	25.6	 16
463	  8	62.5	10.4	 16
464	  8	60.0	10.2	 16
465	  8	52.3	10.1	 16
466	  8	66.3	9.8	 16
467	  8	100.0	15.6	 16
468	  8	67.8	12.2	 16
469	  8	68.5	15.4	 16
470	  8	95.5	20.1	 16
471	  8	55.0	8.1	 16
472	  8	64.3	10.0	 16
473	  8	188.3	43.8	 16
474	  8	57.0	7.4	 16
475	  8	78.8	16.1	 16
476	  8	51.3	10.8	 16
477	  8	101.8	20.0	 16
478	  8	59.8	11.2	 16
479	  8	62.3	10.8	 16
480	  8	51.3	8.5	 16
481	  8	60.8	11.0	 16
482	  8	67.3	17.4	 16
483	  8	141.5	24.0	 16
484	  8	172.0	22.8	 16
485	  8	210.0	52.3	 16
486	  8	142.0	19.9	 16
487	  8	181.8	37.3	 16
488	  8	163.5	27.6	 16
489	  8	78.0	9.9	 16
490	  8	86.0	16.8	 16
491	  8	57.0	10.3	 16
492	  8	61.5	10.6	 16
493	  8	177.5	31.9	 16
494	  8	160.3	22.5	 16
495	  8	272.0	43.7	 16
496	  8	56.0	11.6	 16
497	  8	79.8	15.1	 16
498	  8	74.0	9.1	 16
499	  8	92.0	38.6	 16
500	  8	82.5	10.0	 16
501	  8	111.5	12.6	 16
502	  8	174.3	31.0	 16
503	  8	184.3	25.5	 16
504	  8	107.3	17.0	 16
505	  8	74.3	10.7	 16
506	  8	97.3	15.9	 16
507	  8	138.3	20.0	 16
508	  8	79.3	11.3	 16
509	  8	77.0	15.0	 16
510	  8	76.0	12.5	 16
511	  8	74.5	9.7	 16
512	  8	71.3	12.7	 16
513	  8	49.8	6.6	 16
514	  8	48.3	8.3	 16
515	  8	55.3	14.0	 16
516	  8	55.8	11.8	 16
517	  8	98.5	21.3	 16
518	  8	112.3	18.6	 16
519	  8	289.5	31.4	 16
520	  8	176.5	28.9	 16
521	  8	74.8	13.8	 16
522	  8	108.0	15.7	 16
523	  8	91.5	11.3	 16
524	  8	105.0	20.5	 16
525	  8	54.5	12.3	 16
526	  8	51.0	8.8	 16
527	  8	66.5	15.8	 16
528	  8	89.5	18.0	 16
529	  8	81.3	14.5	 16
530	  8	113.8	15.9	 16
531	  8	395.0	70.3	 16
532	  8	169.8	36.3	 16
533	  8	69.3	12.1	 16
534	  8	60.3	10.2	 16
535	  8	67.5	14.6	 16
536	  8	102.0	18.4	 16
537	  8	82.5	12.6	 16
538	  8	307.5	30.5	 16
539	  8	675.3	87.3	 16
540	  8	276.5	34.8	 16
541	  8	81.3	14.8	 16
542	  8	46.3	8.1	 16
543	  8	57.3	11.5	 16
544	  8	70.5	12.6	 16
545	  8	63.3	11.3	 20
546	  8	68.5	12.7	 16
547	  8	82.3	17.4	 16
548	  8	176.3	28.2	 16
549	  8	127.5	27.6	 16
550	  8	66.3	12.8	 16
551	  8	101.0	16.3	 16
552	  8	193.5	27.2	 16
553	  8	99.0	12.3	 16
554	  8	66.3	17.3	 16
555	  8	62.0	20.1	 16
556	  8	72.3	14.2	 16
557	  8	59.8	11.5	 16
558	  8	218.3	47.9	 16
559	  8	381.5	64.6	 16
560	  8	69.5	13.5	 16
561	  8	95.0	12.3	 16
562	  8	152.3	48.7	 16
563	  8	801.8	105.1	 16
564	  8	95.3	17.3	 16
565	  8	85.3	16.7	 16
566	  8	72.3	13.8	 16
567	  8	75.8	15.8	 16
568	  8	130.0	31.0	 16
569	  8	152.5	36.9	 16
570	  8	99.3	23.7	 16
571	  8	66.0	12.6	 16
572	  8	86.3	17.1	 16
573	  8	104.3	14.2	 16
574	  8	99.3	17.1	 16
575	  8	105.8	18.2	 16
576	  8	90.3	17.8	 16
577	  8	73.5	13.2	 16
578	  8	60.0	11.4	 16
579	  8	52.3	10.4	 16
580	  8	85.8	20.3	 16
581	  8	86.0	14.3	 16
582	  8	133.3	21.5	 16
583	  8	64.3	10.8	 16
584	  8	62.5	17.0	 16
585	  8	94.3	12.9	 16
586	  8	56.5	12.8	 16
587	  8	56.5	11.8	 16
588	  8	53.3	12.0	 16
589	  8	130.5	18.3	 16
590	  8	133.5	24.6	 16
591	  8	82.5	19.0	 16
592	  8	391.3	47.9	 16
593	  8	227.0	28.8	 16
594	  8	68.5	12.8	 16
595	  8	59.5	11.7	 16
596	  8	190.3	19.2	 16
597	  8	62.5	12.4	 16
598	  8	194.3	32.1	 16
599	  8	55.8	14.9	 16
600	  8	56.3	13.7	 16
601	  8	55.3	10.2	 16
602	  8	53.3	8.4	 16
603	  8	95.5	15.1	 16
604	  8	269.0	38.9	 16
605	  8	65.3	11.3	 16
606	  8	58.8	10.0	 16
607	  8	82.0	13.9	 16
608	  8	52.5	12.8	 16
609	  8	125.5	29.3	 16
610	  8	71.0	12.9	 16
611	  8	259.5	52.8	 16
612	  8	100.0	14.6	 16
613	  8	69.5	14.9	 16
614	  8	67.3	14.0	 16
615	  8	207.3	35.4	 16
616	  8	89.0	14.6	 16
617	  8	239.8	28.0	 16
618	  8	63.3	13.5	 16
619	  8	135.3	22.9	 16
620	  8	54.0	8.9	 16
621	  8	161.5	31.6	 16
622	  8	82.8	18.2	 16
623	  8	106.8	20.4	 16
624	  8	55.0	10.9	 16
625	  8	154.3	12.8	 16
626	  8	90.3	16.1	 16
627	  8	373.0	38.4	 16
628	  8	167.3	26.3	 16
629	  8	62.8	9.9	 16
630	  8	162.8	27.9	 16
631	  8	312.5	28.2	 16
632	  8	97.8	13.1	 16
633	  8	105.5	15.3	 16
634	  8	144.5	20.0	 16
635	  8	96.3	12.8	 16
636	  8	58.0	6.6	 16
637	  8	118.8	16.2	 16
638	  8	59.5	11.3	 16
639	  8	57.8	13.6	 16
640	  8	53.5	8.0	 16
641	  8	93.0	18.8	 16
642	  8	176.0	16.9	 16
643	  8	57.3	12.2	 16
644	  8	309.0	29.9	 16
645	  8	90.8	19.7	 16
646	  8	231.5	35.8	 16
647	  8	220.0	31.7	 16
648	  8	237.3	41.2	 16
649	  8	426.8	36.5	 16
650	  8	61.3	10.4	 16
651	  8	69.0	10.7	 16
652	  8	91.8	23.6	 16
653	  8	104.5	19.7	 16
654	  8	70.3	12.0	 16
655	  8	80.3	16.3	 16
656	  8	58.3	15.5	 16
657	  8	72.8	10.6	 16
658	  8	94.8	19.1	 16
659	  8	322.3	30.5	 16
660	  8	63.0	8.4	 16
661	  8	98.3	18.3	 16
662	  8	59.3	8.9	 16
663	  8	91.5	22.9	 20
664	  8	142.3	21.9	 16
665	  8	229.8	26.5	 16
666	  8	197.8	28.2	 16
667	  8	321.8	49.3	 16
668	  8	175.3	29.2	 16
669	  8	181.3	21.5	 16
670	  8	296.5	54.4	 16
671	  8	67.0	12.4	 16
672	  8	75.0	13.1	 16
673	  8	67.8	14.6	 16
674	  8	65.8	15.7	 16
675	  8	68.0	13.5	 16
676	  8	160.3	22.0	 16
677	  8	71.5	16.3	 16
678	  8	349.3	63.4	 16
679	  8	98.3	14.7	 16
680	  8	121.3	21.8	 16
681	  8	136.5	17.4	 16
682	  8	151.3	20.3	 16
683	  8	352.5	42.7	 16
684	  8	140.5	26.5	 16
685	  8	163.0	27.0	 16
686	  8	191.0	29.1	 16
687	  8	1179.3	164.0	 16
688	  8	176.8	13.7	 16
689	  8	119.0	27.3	 16
690	  8	179.8	27.4	 16
691	  8	200.0	26.8	 16
692	  8	251.0	42.9	 16
693	  8	101.0	25.9	 16
694	  8	65.0	12.7	 16
695	  8	62.3	12.1	 16
696	  8	53.3	9.6	 16
697	  8	63.5	12.3	 16
698	  8	65.5	10.3	 16
699	  8	106.0	18.0	 16
700	  8	89.5	16.8	 16
701	  8	74.5	10.3	 16
702	  8	121.5	21.5	 16
703	  8	68.0	13.5	 16
704	  8	82.5	16.3	 16
705	  8	81.0	12.5	 16
706	  8	209.5	31.4	 16
707	  8	154.3	14.7	 16
708	  8	96.8	19.7	 16
709	  8	163.8	19.8	 16
710	  8	97.3	23.6	 16
711	  8	6894.0	869.7	 16
  0	  9	108.3	20.3	 16
  1	  9	281.8	30.1	 16
  2	  9	109.8	17.3	 16
  3	  9	108.0	19.6	 16
  4	  9	79.0	14.1	 16
  5	  9	74.3	10.7	 16
  6	  9	1264.5	143.2	 16
  7	  9	84.3	14.7	 16
  8	  9	91.0	17.6	 16
  9	  9	83.5	10.7	 16
 10	  9	298.5	46.2	 16
 11	  9	72.3	10.5	 16
 12	  9	8011.0	739.7	 16
 13	  9	128.0	14.1	 16
 14	  9	112.5	20.0	 16
 15	  9	139.3	21.8	 16
 16	  9	7976.5	856.0	 16
 17	  9	95.0	15.6	 16
 18	  9	9355.5	251.2	 16
 19	  9	8920.0	590.5	 16
 20	  9	8620.8	585.3	 16
 21	  9	8208.0	1181.3	 12
 22	  9	122.3	16.9	 16
 23	  9	83.8	15.1	 16
 24	  9	8813.0	1388.8	 16
 25	  9	130.8	19.1	 16
 26	  9	116.3	25.6	 16
 27	  9	125.5	20.8	 16
 28	  9	8010.8	1480.3	 16
 29	  9	92.5	13.0	 16
 30	  9	9090.0	191.4	 16
 31	  9	8648.5	923.5	 16
 32	  9	8178.8	842.4	 16
 33	  9	7809.3	1632.7	 16
 34	  9	123.0	24.5	 16
 35	  9	85.0	21.2	 16
 36	  9	8519.8	1657.5	 16
 37	  9	121.8	18.8	 16
 38	  9	101.5	14.7	 16
 39	  9	106.3	17.3	 16
 40	  9	113.8	16.7	 16
 41	  9	83.0	20.8	 16
 42	  9	8449.8	1522.5	 16
 43	  9	116.0	11.6	 16
 44	  9	108.8	17.3	 16
 45	  9	107.3	14.3	 16
 46	  9	7766.3	1405.1	 16
 47	  9	81.0	12.9	 16
 48	  9	109.5	16.5	 16
 49	  9	107.5	13.1	 16
 50	  9	6507.5	1177.3	 16
 51	  9	112.3	14.5	 16
 52	  9	87.3	9.0	 16
 53	  9	78.3	15.4	 16
 54	  9	8591.3	144.7	 16
 55	  9	8449.3	376.1	 16
 56	  9	7980.0	1321.1	 16
 57	  9	114.8	17.5	 16
 58	  9	92.5	8.8	 16
 59	  9	59.0	7.3	 16
 60	  9	67.5	8.4	 16
 61	  9	115.3	21.6	 16
 62	  9	9085.3	1182.4	 16
 63	  9	141.8	24.0	 16
 64	  9	117.3	20.1	 16
 65	  9	120.3	15.9	 16
 66	  9	7990.8	887.9	 16
 67	  9	86.5	10.6	 16
 68	  9	8724.0	999.1	 16
 69	  9	123.0	17.9	 16
 70	  9	107.5	10.7	 16
 71	  9	125.5	165.0	 20
 72	  9	7337.0	2636.5	 16
 73	  9	70.3	11.7	 16
 74	  9	98.3	9.0	 16
 75	  9	100.0	14.3	 16
 76	  9	104.0	16.4	 16
 77	  9	96.3	13.8	 16
 78	  9	108.0	21.6	 16
 79	  9	115.0	70.4	 16
 80	  9	7636.3	2355.3	 16
 81	  9	111.3	22.6	 16
 82	  9	97.5	10.8	 16
 83	  9	131.5	43.9	 16
 84	  9	6926.8	2007.7	 16
 85	  9	72.0	10.2	 16
 86	  9	119.0	20.8	 16
 87	  9	120.5	24.1	 16
 88	  9	6787.3	1635.3	 16
 89	  9	107.3	19.5	 16
 90	  9	103.0	18.8	 16
 91	  9	66.0	12.0	 16
 92	  9	111.3	18.1	 16
 93	  9	106.5	15.2	 16
 94	  9	111.3	14.9	 16
 95	  9	7247.5	1349.0	 16
 96	  9	100.8	13.8	 16
 97	  9	64.0	13.5	 16
 98	  9	92.3	17.6	 16
 99	  9	112.3	11.8	 16
100	  9	120.0	19.8	 16
101	  9	7185.0	1166.6	 16
102	  9	117.3	16.0	 16
103	  9	73.3	16.0	 16
104	  9	7816.8	1236.4	 16
105	  9	112.5	20.2	 16
106	  9	113.0	21.1	 16
107	  9	161.0	20.2	 16
108	  9	7872.8	1163.1	 16
109	  9	66.8	15.0	 16
110	  9	59.3	11.0	 16
111	  9	466.3	63.0	 16
112	  9	1786.8	183.6	 16
113	  9	894.5	133.9	 16
114	  9	333.5	50.2	 16
115	  9	74.3	8.1	 16
116	  9	77.0	9.9	 16
117	  9	63.5	9.3	 16
118	  9	67.3	9.3	 16
119	  9	117.3	21.4	 16
120	  9	375.5	60.3	 16
121	  9	96.5	11.3	 16
122	  9	95.5	13.0	 16
123	  9	74.3	8.8	 16
124	  9	499.3	65.6	 16
125	  9	74.3	18.6	 16
126	  9	73.8	9.9	 16
127	  9	525.8	113.5	 16
128	  9	57.5	11.1	 16
129	  9	122.0	24.9	 16
130	  9	75.0	20.4	 16
131	  9	126.3	19.1	 16
132	  9	463.5	92.7	 16
133	  9	93.3	25.2	 16
134	  9	918.5	205.7	 16
135	  9	57.3	10.6	 16
136	  9	82.3	14.6	 16
137	  9	84.0	19.8	 16
138	  9	65.8	17.6	 16
139	  9	68.3	9.4	 16
140	  9	63.3	16.8	 16
141	  9	284.0	60.4	 16
142	  9	131.3	23.9	 16
143	  9	1042.0	209.7	 16
144	  9	100.8	15.3	 16
145	  9	121.5	22.4	 16
146	  9	107.3	17.0	 16
147	  9	73.0	16.5	 16
148	  9	122.8	26.1	 16
149	  9	76.0	17.7	 16
150	  9	385.5	68.7	 16
151	  9	99.5	18.3	 16
152	  9	6947.5	1225.2	 16
153	  9	813.8	173.6	 16
154	  9	180.5	21.1	 16
155	  9	2312.5	364.6	 16
156	  9	540.3	103.5	 16
157	  9	1093.8	148.2	 16
158	  9	149.3	22.3	 16
159	  9	319.5	24.1	 16
160	  9	797.3	99.8	 16
161	  9	55.5	7.9	 16
162	  9	72.3	12.4	 16
163	  9	95.3	25.8	 16
164	  9	155.5	36.7	 16
165	  9	346.3	39.5	 16
166	  9	124.8	30.9	 16
167	  9	97.0	15.5	 16
168	  9	102.0	17.8	 16
169	  9	482.5	51.2	 16
170	  9	2295.0	252.3	 16
171	  9	69.5	9.2	 16
172	  9	121.5	17.0	 16
173	  9	159.8	29.5	 16
174	  9	266.8	28.6	 16
175	  9	207.5	24.0	 16
176	  9	77.8	15.5	 16
177	  9	64.3	9.0	 16
178	  9	61.8	12.3	 16
179	  9	85.3	13.7	 16
180	  9	63.0	10.7	 16
181	  9	62.5	12.5	 16
182	  9	71.0	12.0	 16
183	  9	65.8	11.6	 16
184	  9	66.3	12.8	 16
185	  9	70.0	14.4	 16
186	  9	70.5	15.1	 16
187	  9	63.8	14.3	 16
188	  9	68.0	11.9	 16
189	  9	68.0	12.4	 16
190	  9	74.8	11.9	 20
191	  9	634.0	192.8	 16
192	  9	415.8	117.5	 16
193	  9	89.3	11.4	 16
194	  9	55.0	9.5	 16
195	  9	256.5	65.4	 16
196	  9	74.3	14.1	 16
197	  9	88.5	17.8	 16
198	  9	167.0	31.3	 16
199	  9	141.0	22.9	 16
200	  9	69.0	14.6	 16
201	  9	3483.5	824.8	 16
202	  9	73.5	13.0	 16
203	  9	84.0	19.9	 16
204	  9	98.0	18.6	 16
205	  9	290.0	49.0	 16
206	  9	533.0	100.0	 16
207	  9	160.3	27.1	 16
208	  9	134.0	21.9	 16
209	  9	79.0	15.7	 16
210	  9	240.0	45.5	 16
211	  9	112.3	17.1	 16
212	  9	652.8	83.5	 16
213	  9	403.0	74.0	 16
214	  9	136.0	16.4	 16
215	  9	100.3	19.3	 16
216	  9	99.0	18.5	 16
217	  9	65.5	12.9	 16
218	  9	68.5	11.1	 16
219	  9	57.3	12.0	 16
220	  9	217.5	34.3	 16
221	  9	128.0	25.8	 16
222	  9	134.3	27.3	 16
223	  9	167.0	22.5	 16
224	  9	108.0	14.1	 16
225	  9	130.3	21.2	 16
226	  9	65.5	9.7	 16
227	  9	146.5	19.6	 16
228	  9	55.3	7.8	 16
229	  9	351.3	66.7	 16
230	  9	121.5	19.3	 16
231	  9	1541.0	287.8	 16
232	  9	115.3	19.4	 16
233	  9	702.8	112.8	 16
234	  9	88.0	16.6	 16
235	  9	655.8	104.9	 16
236	  9	273.0	25.3	 16
237	  9	128.0	16.0	 16
238	  9	716.8	109.4	 16
239	  9	87.8	17.5	 16
240	  9	379.5	59.1	 16
241	  9	115.5	18.6	 16
242	  9	88.3	9.6	 16
243	  9	67.8	11.6	 16
244	  9	85.5	13.0	 16
245	  9	107.5	15.3	 16
246	  9	55.3	9.3	 16
247	  9	3852.8	634.2	 16
248	  9	124.8	19.6	 16
249	  9	180.0	34.2	 16
250	  9	210.8	42.2	 16
251	  9	163.8	20.8	 16
252	  9	666.3	118.1	 16
253	  9	319.8	38.5	 16
254	  9	215.8	32.9	 16
255	  9	61.3	10.6	 16
256	  9	100.5	15.4	 16
257	  9	95.5	18.3	 16
258	  9	1259.8	174.1	 16
259	  9	115.3	21.5	 16
260	  9	116.8	18.6	 16
261	  9	105.3	15.6	 16
262	  9	664.0	102.6	 16
263	  9	69.5	11.2	 16
264	  9	67.8	15.0	 16
265	  9	66.5	13.8	 16
266	  9	376.0	36.6	 16
267	  9	397.0	44.4	 16
268	  9	106.0	14.9	 16
269	  9	693.5	60.6	 16
270	  9	74.3	17.2	 16
271	  9	58.5	13.7	 16
272	  9	62.5	12.0	 16
273	  9	64.8	12.6	 16
274	  9	101.8	12.9	 16
275	  9	91.3	17.0	 16
276	  9	58.0	13.2	 16
277	  9	62.0	9.1	 16
278	  9	93.8	22.7	 16
279	  9	232.0	41.5	 16
280	  9	85.3	15.7	 16
281	  9	75.0	10.8	 16
282	  9	154.3	19.2	 16
283	  9	49.8	9.6	 16
284	  9	89.3	15.7	 16
285	  9	74.5	14.6	 16
286	  9	59.3	25.7	 16
287	  9	61.5	13.1	 16
288	  9	80.3	11.7	 16
289	  9	497.8	57.3	 16
290	  9	236.3	25.1	 16
291	  9	147.3	20.9	 16
292	  9	647.3	74.0	 16
293	  9	106.3	23.7	 16
294	  9	1321.3	93.7	 16
295	  9	443.0	32.8	 16
296	  9	137.3	28.6	 16
297	  9	432.0	49.1	 16
298	  9	89.3	19.4	 16
299	  9	182.3	27.9	 16
300	  9	246.8	30.6	 16
301	  9	105.5	18.3	 16
302	  9	76.0	12.5	 16
303	  9	68.0	13.8	 16
304	  9	88.8	13.2	 16
305	  9	657.8	85.4	 16
306	  9	199.0	20.7	 16
307	  9	127.5	17.1	 16
308	  9	428.3	35.1	 16
309	  9	201.3	35.3	 20
310	  9	554.8	159.0	 16
311	  9	685.8	233.8	 16
312	  9	88.8	13.7	 16
313	  9	349.5	92.7	 16
314	  9	285.0	95.1	 16
315	  9	110.5	15.6	 16
316	  9	230.5	38.0	 16
317	  9	361.0	109.7	 16
318	  9	77.0	16.7	 16
319	  9	67.5	14.1	 16
320	  9	363.5	122.4	 16
321	  9	166.8	32.8	 16
322	  9	287.5	87.2	 16
323	  9	75.8	12.0	 16
324	  9	88.0	22.2	 16
325	  9	104.0	28.8	 16
326	  9	55.3	7.8	 16
327	  9	87.8	22.9	 16
328	  9	451.3	124.1	 16
329	  9	145.0	18.4	 16
330	  9	151.3	27.3	 16
331	  9	88.8	20.5	 16
332	  9	469.0	56.8	 16
333	  9	483.3	87.7	 16
334	  9	112.0	18.5	 16
335	  9	66.5	11.6	 16
336	  9	71.3	15.8	 16
337	  9	70.3	12.5	 16
338	  9	73.8	11.0	 16
339	  9	208.5	37.4	 16
340	  9	74.3	18.0	 16
341	  9	93.0	14.7	 16
342	  9	175.5	22.7	 16
343	  9	290.8	47.2	 16
344	  9	1094.8	195.9	 16
345	  9	59.3	11.4	 16
346	  9	2036.5	302.8	 16
347	  9	96.5	15.5	 16
348	  9	1287.5	156.1	 16
349	  9	117.3	23.4	 16
350	  9	1606.0	204.0	 16
351	  9	130.5	17.8	 16
352	  9	183.3	20.8	 16
353	  9	176.5	29.2	 16
354	  9	143.3	18.2	 16
355	  9	451.5	65.9	 16
356	  9	813.5	142.1	 16
357	  9	140.3	24.3	 16
358	  9	196.3	21.9	 16
359	  9	199.0	33.5	 16
360	  9	164.3	26.8	 16
361	  9	218.5	24.4	 16
362	  9	96.3	15.3	 16
363	  9	499.8	68.6	 16
364	  9	54.5	12.1	 16
365	  9	76.3	12.7	 16
366	  9	53.3	9.7	 16
367	  9	62.3	14.0	 16
368	  9	57.5	11.6	 16
369	  9	179.0	33.3	 16
370	  9	125.8	24.8	 16
371	  9	254.3	34.7	 16
372	  9	164.5	31.1	 16
373	  9	59.5	12.6	 16
374	  9	86.0	11.3	 16
375	  9	80.5	10.3	 16
376	  9	255.8	34.2	 16
377	  9	1651.3	131.3	 16
378	  9	4719.8	408.6	 16
379	  9	118.5	15.3	 16
380	  9	64.3	10.9	 16
381	  9	156.8	21.0	 16
382	  9	170.0	22.9	 16
383	  9	181.8	20.0	 16
384	  9	673.5	45.8	 16
385	  9	940.0	116.9	 16
386	  9	190.0	29.0	 16
387	  9	1181.5	83.6	 16
388	  9	371.3	62.2	 16
389	  9	72.8	15.5	 16
390	  9	72.3	14.9	 16
391	  9	133.8	22.1	 16
392	  9	132.5	18.1	 16
393	  9	61.0	8.9	 16
394	  9	3676.0	383.8	 16
395	  9	93.5	17.6	 16
396	  9	51.0	8.0	 16
397	  9	62.0	10.1	 16
398	  9	118.8	22.0	 16
399	  9	57.0	13.1	 16
400	  9	65.3	12.5	 16
401	  9	63.5	15.0	 16
402	  9	65.3	10.9	 16
403	  9	74.5	13.2	 16
404	  9	79.5	14.2	 16
405	  9	96.3	22.0	 16
406	  9	85.3	19.7	 16
407	  9	190.5	20.7	 16
408	  9	78.5	16.2	 16
409	  9	142.0	26.4	 16
410	  9	75.3	12.9	 16
411	  9	172.5	19.7	 16
412	  9	119.5	14.0	 16
413	  9	161.8	27.3	 16
414	  9	130.0	15.8	 16
415	  9	382.8	44.2	 16
416	  9	75.8	16.0	 16
417	  9	109.3	14.1	 16
418	  9	59.3	15.0	 16
419	  9	352.5	39.9	 16
420	  9	648.8	30.5	 16
421	  9	79.0	15.7	 16
422	  9	49.3	10.6	 16
423	  9	1131.8	101.7	 16
424	  9	316.5	48.4	 16
425	  9	59.5	13.2	 16
426	  9	56.8	13.6	 16
427	  9	365.5	96.7	 20
428	  9	114.5	22.6	 16
429	  9	63.5	14.8	 16
430	  9	93.3	16.6	 16
431	  9	56.0	8.5	 16
432	  9	61.0	13.4	 16
433	  9	997.3	295.4	 16
434	  9	73.0	15.1	 16
435	  9	57.0	8.3	 16
436	  9	54.5	10.2	 16
437	  9	74.3	18.0	 16
438	  9	1808.5	507.5	 16
439	  9	114.5	21.4	 16
440	  9	211.3	35.2	 16
441	  9	122.5	18.4	 16
442	  9	1700.3	463.3	 16
443	  9	264.8	50.5	 16
444	  9	498.8	130.5	 16
445	  9	65.5	11.7	 16
446	  9	141.5	41.7	 16
447	  9	99.3	19.1	 16
448	  9	78.3	14.2	 16
449	  9	56.5	11.2	 16
450	  9	112.3	14.4	 16
451	  9	576.5	139.4	 16
452	  9	59.3	9.2	 16
453	  9	229.5	38.6	 16
454	  9	1104.8	243.4	 16
455	  9	206.0	32.5	 16
456	  9	221.8	55.7	 16
457	  9	50.3	12.1	 16
458	  9	62.5	18.4	 16
459	  9	60.3	10.9	 16
460	  9	444.3	77.2	 16
461	  9	60.0	13.1	 16
462	  9	92.0	20.4	 16
463	  9	256.5	51.9	 16
464	  9	53.8	9.4	 16
465	  9	226.5	43.9	 16
466	  9	214.0	16.4	 16
467	  9	55.8	9.4	 16
468	  9	53.3	6.6	 16
469	  9	135.5	21.3	 16
470	  9	156.5	31.9	 16
471	  9	84.3	15.9	 16
472	  9	159.5	19.2	 16
473	  9	129.0	23.2	 16
474	  9	336.3	58.7	 16
475	  9	72.5	11.2	 16
476	  9	86.3	17.2	 16
477	  9	68.8	13.5	 16
478	  9	211.0	35.0	 16
479	  9	61.0	8.9	 16
480	  9	267.8	67.1	 16
481	  9	111.3	16.8	 16
482	  9	67.3	7.8	 16
483	  9	50.3	10.7	 16
484	  9	598.5	86.2	 16
485	  9	67.0	10.2	 16
486	  9	1985.5	427.5	 16
487	  9	151.3	23.1	 16
488	  9	246.0	53.8	 16
489	  9	58.0	11.0	 16
490	  9	96.3	13.8	 16
491	  9	64.8	14.9	 16
492	  9	254.0	42.3	 16
493	  9	297.5	29.5	 16
494	  9	468.3	55.5	 16
495	  9	281.0	40.1	 16
496	  9	184.3	25.8	 16
497	  9	659.5	107.4	 16
498	  9	177.0	24.5	 16
499	  9	308.5	46.9	 16
500	  9	103.3	16.1	 16
501	  9	82.3	14.0	 16
502	  9	96.8	17.8	 16
503	  9	117.0	18.3	 16
504	  9	115.8	22.1	 16
505	  9	977.8	205.1	 16
506	  9	641.0	86.9	 16
507	  9	428.8	70.6	 16
508	  9	1143.3	197.9	 16
509	  9	55.0	8.2	 16
510	  9	581.8	83.9	 16
511	  9	158.0	19.7	 16
512	  9	61.3	11.8	 16
513	  9	147.5	26.5	 16
514	  9	558.5	103.7	 16
515	  9	62.0	10.8	 16
516	  9	160.5	29.8	 16
517	  9	52.3	9.4	 16
518	  9	55.8	9.9	 16
519	  9	231.0	27.0	 16
520	  9	269.3	27.6	 16
521	  9	75.5	21.6	 16
522	  9	63.0	10.1	 16
523	  9	71.3	14.4	 16
524	  9	55.3	8.4	 16
525	  9	87.0	12.8	 16
526	  9	146.8	20.8	 16
527	  9	95.3	11.3	 16
528	  9	71.0	10.9	 16
529	  9	75.5	13.3	 16
530	  9	291.8	32.7	 16
531	  9	86.5	12.6	 16
532	  9	56.0	10.8	 16
533	  9	59.3	9.0	 16
534	  9	60.5	10.5	 16
535	  9	84.8	9.2	 16
536	  9	72.3	12.2	 16
537	  9	140.3	26.2	 16
538	  9	72.3	13.2	 16
539	  9	77.3	15.3	 16
540	  9	594.8	50.9	 16
541	  9	114.3	18.8	 16
542	  9	59.3	7.8	 16
543	  9	116.0	16.8	 16
544	  9	69.5	12.1	 16
545	  9	701.8	82.7	 16
546	  9	156.0	27.4	 20
547	  9	164.3	34.9	 16
548	  9	177.5	34.6	 16
549	  9	139.0	21.5	 16
550	  9	184.5	45.2	 16
551	  9	259.8	32.7	 16
552	  9	139.3	22.1	 16
553	  9	367.0	62.0	 16
554	  9	125.5	29.3	 16
555	  9	69.3	13.4	 16
556	  9	113.5	22.9	 16
557	  9	86.3	18.3	 16
558	  9	98.0	14.4	 16
559	  9	106.0	18.1	 16
560	  9	71.3	15.4	 16
561	  9	382.5	58.3	 16
562	  9	65.3	12.3	 16
563	  9	119.5	18.3	 16
564	  9	413.3	59.3	 16
565	  9	575.5	88.6	 16
566	  9	1914.3	299.0	 16
567	  9	70.5	13.5	 16
568	  9	59.3	13.8	 16
569	  9	82.8	16.6	 16
570	  9	543.8	67.9	 16
571	  9	1309.0	133.2	 16
572	  9	233.0	31.1	 16
573	  9	143.5	19.4	 16
574	  9	255.5	20.5	 16
575	  9	202.8	26.0	 16
576	  9	150.3	16.7	 16
577	  9	106.8	17.9	 16
578	  9	64.0	12.9	 16
579	  9	64.0	12.6	 16
580	  9	114.8	24.6	 16
581	  9	675.3	69.2	 16
582	  9	270.5	30.8	 16
583	  9	78.3	12.6	 16
584	  9	81.0	11.2	 16
585	  9	176.3	25.3	 16
586	  9	238.3	29.4	 16
587	  9	56.5	11.6	 16
588	  9	92.0	11.8	 16
589	  9	125.8	23.7	 16
590	  9	185.5	19.6	 16
591	  9	305.3	38.9	 16
592	  9	62.3	13.5	 16
593	  9	107.5	25.4	 16
594	  9	166.3	30.7	 16
595	  9	239.0	26.4	 16
596	  9	1350.3	102.7	 16
597	  9	1598.0	135.2	 16
598	  9	650.0	60.1	 16
599	  9	189.5	23.9	 16
600	  9	206.0	26.8	 16
601	  9	167.3	30.4	 16
602	  9	102.3	12.8	 16
603	  9	597.5	81.8	 16
604	  9	251.5	42.9	 16
605	  9	63.0	13.9	 16
606	  9	354.3	37.6	 16
607	  9	71.0	12.8	 16
608	  9	54.0	8.5	 16
609	  9	108.8	15.4	 16
610	  9	103.0	21.1	 16
611	  9	97.8	15.7	 16
612	  9	175.3	24.4	 16
613	  9	3655.5	379.3	 16
614	  9	73.3	15.5	 16
615	  9	148.5	25.6	 16
616	  9	255.3	31.8	 16
617	  9	676.8	58.8	 16
618	  9	157.8	20.8	 16
619	  9	70.3	12.2	 16
620	  9	282.3	36.6	 16
621	  9	155.0	18.3	 16
622	  9	94.0	14.7	 16
623	  9	282.0	27.8	 16
624	  9	479.3	58.7	 16
625	  9	156.3	21.8	 16
626	  9	55.5	11.5	 16
627	  9	294.0	27.4	 16
628	  9	88.3	19.1	 16
629	  9	73.5	17.1	 16
630	  9	179.0	18.5	 16
631	  9	189.0	24.9	 16
632	  9	2186.0	167.6	 16
633	  9	142.8	14.8	 16
634	  9	1582.0	94.0	 16
635	  9	2613.3	178.4	 16
636	  9	537.5	57.8	 16
637	  9	72.5	9.7	 16
638	  9	70.0	13.9	 16
639	  9	54.8	10.2	 16
640	  9	70.5	14.7	 16
641	  9	882.3	76.4	 16
642	  9	66.3	12.0	 16
643	  9	63.8	13.4	 16
644	  9	84.5	12.9	 16
645	  9	81.8	14.4	 16
646	  9	378.5	49.7	 16
647	  9	92.0	12.2	 16
648	  9	1690.5	201.6	 16
649	  9	57.0	10.5	 16
650	  9	68.8	12.5	 16
651	  9	57.0	10.4	 16
652	  9	317.8	34.4	 16
653	  9	946.0	109.0	 16
654	  9	252.3	34.0	 16
655	  9	265.5	30.5	 16
656	  9	100.3	12.3	 16
657	  9	384.3	52.0	 16
658	  9	234.3	32.2	 16
659	  9	356.3	47.5	 16
660	  9	122.8	20.6	 16
661	  9	130.3	20.3	 16
662	  9	59.8	11.5	 16
663	  9	349.0	29.9	 16
664	  9	985.3	106.1	 16
665	  9	94.0	15.0	 20
666	  9	175.5	33.3	 16
667	  9	281.3	40.1	 16
668	  9	463.5	87.4	 16
669	  9	189.5	25.6	 16
670	  9	106.3	19.8	 16
671	  9	793.5	164.0	 16
672	  9	248.0	43.4	 16
673	  9	116.5	23.2	 16
674	  9	192.3	33.3	 16
675	  9	63.5	8.0	 16
676	  9	96.5	16.3	 16
677	  9	234.8	28.4	 16
678	  9	135.0	23.7	 16
679	  9	218.5	40.9	 16
680	  9	864.8	151.9	 16
681	  9	5562.8	383.1	 16
682	  9	6226.3	523.8	 16
683	  9	6522.3	492.4	 16
684	  9	6484.3	1117.6	 16
685	  9	320.5	29.9	 16
686	  9	370.3	60.8	 16
687	  9	66.0	12.5	 16
688	  9	58.3	10.8	 16
689	  9	77.3	15.5	 16
690	  9	65.0	11.6	 16
691	  9	235.3	32.3	 16
692	  9	69.5	12.2	 16
693	  9	167.8	23.0	 16
694	  9	138.5	23.0	 16
695	  9	88.0	13.6	 16
696	  9	96.5	15.4	 16
697	  9	353.3	31.2	 16
698	  9	1654.0	216.1	 16
699	  9	326.0	28.5	 16
700	  9	355.3	45.9	 16
701	  9	81.5	13.3	 16
702	  9	77.5	15.8	 16
703	  9	46.5	8.5	 16
704	  9	66.5	12.1	 16
705	  9	138.3	28.3	 16
706	  9	183.3	23.6	 16
707	  9	167.5	28.1	 16
708	  9	586.8	33.1	 16
709	  9	420.8	40.1	 16
710	  9	1092.3	105.9	 16
711	  9	107.3	14.1	 16
  0	 10	8809.0	1243.2	 16
  1	 10	93.0	14.6	 16
  2	 10	102.5	15.2	 16
  3	 10	72.3	16.7	 16
  4	 10	59.3	7.6	 16
  5	 10	68.5	14.4	 16
  6	 10	143.3	22.8	 16
  7	 10	66.3	15.0	 16
  8	 10	69.3	10.7	 16
  9	 10	80.0	9.2	 16
 10	 10	118.3	19.0	 16
 11	 10	57.3	10.9	 16
 12	 10	8303.0	815.7	 16
 13	 10	109.3	17.0	 16
 14	 10	124.5	14.5	 16
 15	 10	108.0	11.4	 16
 16	 10	8105.0	910.7	 16
 17	 10	83.3	16.3	 16
 18	 10	9291.5	1152.6	 16
 19	 10	130.0	22.1	 16
 20	 10	126.3	25.3	 16
 21	 10	125.0	19.0	 16
 22	 10	100.3	15.0	 16
 23	 10	74.8	13.4	 16
 24	 10	8913.0	1445.3	 16
 25	 10	98.3	13.3	 16
 26	 10	103.3	16.5	 16
 27	 10	112.8	16.3	 16
 28	 10	8041.8	1468.2	 16
 29	 10	83.0	15.7	 16
 30	 10	9249.8	2123.0	 16
 31	 10	131.8	17.6	 16
 32	 10	120.3	20.9	 16
 33	 10	117.8	15.4	 16
 34	 10	107.5	16.6	 16
 35	 10	80.0	15.4	 16
 36	 10	8519.8	1839.6	 16
 37	 10	113.3	13.7	 16
 38	 10	102.3	13.4	 16
 39	 10	122.0	14.0	 16
 40	 10	6972.5	1505.4	 16
 41	 10	83.8	17.4	 16
 42	 10	8642.8	1551.4	 16
 43	 10	123.8	20.5	 16
 44	 10	103.3	14.1	 16
 45	 10	98.0	16.6	 16
 46	 10	7789.0	1471.0	 16
 47	 10	70.5	12.9	 16
 48	 10	98.5	11.8	 16
 49	 10	97.0	16.9	 16
 50	 10	6971.0	1158.9	 16
 51	 10	124.3	22.1	 16
 52	 10	101.3	13.7	 16
 53	 10	93.5	43.3	 16
 54	 10	8512.5	1315.1	 16
 55	 10	115.8	22.1	 16
 56	 10	88.0	15.4	 16
 57	 10	89.8	11.7	 16
 58	 10	89.5	13.1	 16
 59	 10	59.3	9.8	 16
 60	 10	56.0	10.3	 16
 61	 10	83.8	21.6	 16
 62	 10	9034.3	1163.4	 16
 63	 10	121.8	17.1	 16
 64	 10	110.8	14.4	 16
 65	 10	114.8	17.6	 16
 66	 10	7933.0	959.1	 16
 67	 10	78.8	14.1	 16
 68	 10	8491.5	1596.3	 16
 69	 10	104.8	16.0	 16
 70	 10	101.8	16.2	 16
 71	 10	98.5	14.5	 16
 72	 10	7311.0	1272.3	 16
 73	 10	64.3	14.2	 20
 74	 10	98.5	18.0	 16
 75	 10	90.0	18.9	 16
 76	 10	90.5	12.8	 16
 77	 10	98.8	19.5	 16
 78	 10	87.8	12.4	 16
 79	 10	87.0	61.3	 16
 80	 10	7691.0	2372.7	 16
 81	 10	100.5	16.7	 16
 82	 10	136.0	24.7	 16
 83	 10	200.8	52.4	 16
 84	 10	7056.0	2065.8	 16
 85	 10	75.0	11.3	 16
 86	 10	98.0	12.5	 16
 87	 10	134.0	28.2	 16
 88	 10	7037.5	1753.8	 16
 89	 10	103.0	8.1	 16
 90	 10	89.3	8.4	 16
 91	 10	69.8	18.2	 16
 92	 10	7064.0	1516.4	 16
 93	 10	102.5	19.9	 16
 94	 10	119.3	24.3	 16
 95	 10	7200.8	1350.1	 16
 96	 10	112.0	18.2	 16
 97	 10	71.3	13.7	 16
 98	 10	7266.0	1197.8	 16
 99	 10	101.3	14.9	 16
100	 10	111.3	20.2	 16
101	 10	7144.0	1053.2	 16
102	 10	106.8	19.0	 16
103	 10	66.8	18.5	 16
104	 10	7967.0	1145.2	 16
105	 10	114.8	27.3	 16
106	 10	97.5	15.8	 16
107	 10	122.3	25.9	 16
108	 10	7696.3	1172.6	 16
109	 10	58.3	15.5	 16
110	 10	52.5	11.3	 16
111	 10	173.5	30.1	 16
112	 10	439.5	63.9	 16
113	 10	283.0	48.5	 16
114	 10	242.0	39.6	 16
115	 10	80.3	10.9	 16
116	 10	57.5	12.7	 16
117	 10	67.0	13.3	 16
118	 10	71.0	13.1	 16
119	 10	96.8	21.8	 16
120	 10	89.8	13.9	 16
121	 10	100.0	16.1	 16
122	 10	62.3	10.3	 16
123	 10	79.8	17.5	 16
124	 10	131.5	23.8	 16
125	 10	65.3	15.6	 16
126	 10	65.3	14.4	 16
127	 10	74.8	15.8	 16
128	 10	53.5	8.4	 16
129	 10	70.0	19.1	 16
130	 10	85.0	13.5	 16
131	 10	110.3	15.5	 16
132	 10	125.5	20.5	 16
133	 10	65.5	12.8	 16
134	 10	86.3	21.3	 16
135	 10	62.5	13.8	 16
136	 10	57.5	11.7	 16
137	 10	60.8	15.2	 16
138	 10	60.3	8.9	 16
139	 10	62.8	10.8	 16
140	 10	71.0	12.2	 16
141	 10	70.3	12.0	 16
142	 10	78.3	13.6	 16
143	 10	393.5	83.2	 16
144	 10	204.8	27.2	 16
145	 10	63.3	10.7	 16
146	 10	76.0	11.4	 16
147	 10	64.8	15.5	 16
148	 10	84.3	15.8	 16
149	 10	64.3	17.5	 16
150	 10	106.3	18.6	 16
151	 10	58.0	10.4	 16
152	 10	1620.3	395.1	 16
153	 10	97.3	15.2	 16
154	 10	237.8	31.7	 16
155	 10	592.8	152.9	 16
156	 10	92.8	14.7	 16
157	 10	418.3	75.7	 16
158	 10	106.0	10.2	 16
159	 10	282.0	41.8	 16
160	 10	786.8	121.2	 16
161	 10	61.5	9.6	 16
162	 10	54.3	8.4	 16
163	 10	80.3	10.0	 16
164	 10	88.0	14.6	 16
165	 10	159.8	24.8	 16
166	 10	76.8	14.7	 16
167	 10	80.0	14.3	 16
168	 10	94.3	17.9	 16
169	 10	509.5	53.2	 16
170	 10	589.8	75.4	 16
171	 10	70.0	11.2	 16
172	 10	90.3	13.8	 16
173	 10	61.3	15.5	 16
174	 10	83.5	12.8	 16
175	 10	155.0	25.0	 16
176	 10	71.0	11.2	 16
177	 10	69.5	13.4	 16
178	 10	57.3	8.1	 16
179	 10	50.5	13.0	 16
180	 10	62.3	11.3	 16
181	 10	71.5	15.5	 16
182	 10	72.0	9.1	 16
183	 10	73.0	13.2	 16
184	 10	78.3	12.1	 16
185	 10	72.5	15.3	 16
186	 10	72.8	13.1	 16
187	 10	59.8	10.5	 16
188	 10	71.3	10.4	 16
189	 10	67.0	10.6	 16
190	 10	68.3	10.0	 16
191	 10	274.5	47.6	 16
192	 10	162.0	34.2	 20
193	 10	59.0	10.7	 16
194	 10	51.5	12.7	 16
195	 10	69.5	8.6	 16
196	 10	56.5	10.6	 16
197	 10	74.3	12.2	 16
198	 10	83.0	13.5	 16
199	 10	133.8	28.3	 16
200	 10	65.3	10.9	 16
201	 10	1021.5	288.5	 16
202	 10	56.8	9.1	 16
203	 10	67.3	13.7	 16
204	 10	82.5	13.9	 16
205	 10	127.5	23.7	 16
206	 10	273.5	48.6	 16
207	 10	110.3	16.6	 16
208	 10	116.5	19.3	 16
209	 10	67.5	11.6	 16
210	 10	153.5	26.5	 16
211	 10	91.5	13.2	 16
212	 10	343.5	38.9	 16
213	 10	189.3	35.0	 16
214	 10	183.5	32.9	 16
215	 10	95.3	16.2	 16
216	 10	68.5	11.7	 16
217	 10	79.3	15.4	 16
218	 10	66.3	8.2	 16
219	 10	55.3	8.2	 16
220	 10	120.5	19.8	 16
221	 10	136.5	16.1	 16
222	 10	91.5	17.5	 16
223	 10	133.3	15.0	 16
224	 10	139.8	25.4	 16
225	 10	72.3	13.7	 16
226	 10	64.0	13.9	 16
227	 10	65.5	8.9	 16
228	 10	54.8	9.4	 16
229	 10	100.3	19.7	 16
230	 10	69.0	8.3	 16
231	 10	153.8	38.3	 16
232	 10	104.5	15.8	 16
233	 10	143.0	27.4	 16
234	 10	63.8	10.6	 16
235	 10	169.8	44.0	 16
236	 10	88.3	15.9	 16
237	 10	66.3	11.0	 16
238	 10	93.0	18.0	 16
239	 10	123.3	17.0	 16
240	 10	106.5	11.3	 16
241	 10	106.3	13.7	 16
242	 10	64.0	9.7	 16
243	 10	71.0	15.6	 16
244	 10	70.5	10.9	 16
245	 10	151.5	30.3	 16
246	 10	52.3	10.3	 16
247	 10	368.0	62.2	 16
248	 10	70.0	12.7	 16
249	 10	64.8	11.3	 16
250	 10	76.5	16.5	 16
251	 10	120.8	17.1	 16
252	 10	81.5	10.7	 16
253	 10	209.5	30.4	 16
254	 10	72.0	12.6	 16
255	 10	59.8	14.7	 16
256	 10	111.0	24.1	 16
257	 10	83.5	19.7	 16
258	 10	271.5	43.8	 16
259	 10	78.3	10.9	 16
260	 10	143.3	49.3	 16
261	 10	104.0	16.8	 16
262	 10	109.5	19.2	 16
263	 10	66.0	10.0	 16
264	 10	64.5	8.2	 16
265	 10	62.8	9.6	 16
266	 10	146.3	23.0	 16
267	 10	158.0	20.8	 16
268	 10	95.3	16.2	 16
269	 10	271.8	41.2	 16
270	 10	55.3	9.4	 16
271	 10	56.0	11.9	 16
272	 10	65.8	13.2	 16
273	 10	57.0	12.4	 16
274	 10	59.5	9.4	 16
275	 10	50.0	10.2	 16
276	 10	53.8	10.7	 16
277	 10	55.0	12.1	 16
278	 10	70.3	10.6	 16
279	 10	97.8	21.8	 16
280	 10	72.0	13.7	 16
281	 10	79.5	15.0	 16
282	 10	157.0	26.3	 16
283	 10	56.5	8.7	 16
284	 10	48.0	8.3	 16
285	 10	62.0	13.3	 16
286	 10	58.5	8.4	 16
287	 10	61.0	14.0	 16
288	 10	62.3	12.2	 16
289	 10	106.0	13.5	 16
290	 10	141.3	23.9	 16
291	 10	125.5	20.9	 16
292	 10	191.8	22.0	 16
293	 10	104.8	16.8	 16
294	 10	1735.8	170.2	 16
295	 10	577.8	69.6	 16
296	 10	84.3	13.5	 16
297	 10	528.5	58.7	 16
298	 10	138.3	18.8	 16
299	 10	74.0	10.8	 16
300	 10	81.3	14.4	 16
301	 10	102.0	20.4	 16
302	 10	67.5	13.8	 16
303	 10	68.0	10.9	 16
304	 10	136.0	22.3	 16
305	 10	349.3	40.0	 16
306	 10	74.8	16.6	 16
307	 10	112.3	13.1	 16
308	 10	128.0	23.8	 16
309	 10	97.8	13.5	 16
310	 10	182.3	37.2	 20
311	 10	143.5	40.8	 16
312	 10	66.3	12.0	 16
313	 10	99.8	16.7	 16
314	 10	80.0	14.9	 16
315	 10	87.5	21.0	 16
316	 10	175.3	103.1	 16
317	 10	1019.3	367.0	 16
318	 10	59.5	9.6	 16
319	 10	59.3	6.4	 16
320	 10	112.5	23.9	 16
321	 10	87.3	15.0	 16
322	 10	262.5	67.9	 16
323	 10	62.0	13.3	 16
324	 10	110.8	17.3	 16
325	 10	56.0	13.1	 16
326	 10	51.0	8.7	 16
327	 10	69.0	22.7	 16
328	 10	189.3	34.9	 16
329	 10	94.8	17.2	 16
330	 10	79.3	16.3	 16
331	 10	66.0	10.2	 16
332	 10	406.3	70.0	 16
333	 10	307.8	37.8	 16
334	 10	101.0	17.5	 16
335	 10	55.8	17.1	 16
336	 10	55.0	11.7	 16
337	 10	54.5	11.8	 16
338	 10	76.0	15.7	 16
339	 10	131.5	26.8	 16
340	 10	93.3	16.6	 16
341	 10	63.3	12.0	 16
342	 10	113.5	12.1	 16
343	 10	84.0	15.5	 16
344	 10	252.0	43.9	 16
345	 10	54.3	11.7	 16
346	 10	252.3	30.0	 16
347	 10	89.0	12.7	 16
348	 10	1045.8	114.0	 16
349	 10	87.3	16.5	 16
350	 10	301.0	36.3	 16
351	 10	106.0	15.6	 16
352	 10	120.8	33.5	 16
353	 10	93.8	18.8	 16
354	 10	65.3	7.5	 16
355	 10	167.3	32.4	 16
356	 10	149.0	24.1	 16
357	 10	98.8	16.8	 16
358	 10	68.0	10.1	 16
359	 10	123.3	128.9	 16
360	 10	57.8	11.0	 16
361	 10	149.5	24.1	 16
362	 10	65.0	11.5	 16
363	 10	119.3	21.8	 16
364	 10	56.3	10.7	 16
365	 10	58.8	14.1	 16
366	 10	41.3	6.0	 16
367	 10	47.3	11.5	 16
368	 10	60.3	11.9	 16
369	 10	90.0	13.3	 16
370	 10	117.5	21.6	 16
371	 10	87.3	10.2	 16
372	 10	64.5	17.6	 16
373	 10	55.8	9.9	 16
374	 10	64.0	11.8	 16
375	 10	83.3	12.0	 16
376	 10	96.0	17.0	 16
377	 10	467.3	53.2	 16
378	 10	715.0	89.7	 16
379	 10	84.3	12.4	 16
380	 10	52.5	11.2	 16
381	 10	65.0	14.5	 16
382	 10	79.3	11.0	 16
383	 10	173.0	30.8	 16
384	 10	166.0	23.3	 16
385	 10	166.5	27.7	 16
386	 10	214.3	30.7	 16
387	 10	215.0	25.0	 16
388	 10	70.0	11.4	 16
389	 10	65.5	10.2	 16
390	 10	66.3	12.2	 16
391	 10	104.3	14.9	 16
392	 10	93.5	17.9	 16
393	 10	61.3	9.5	 16
394	 10	880.3	56.1	 16
395	 10	187.0	28.9	 16
396	 10	49.8	10.3	 16
397	 10	59.3	9.8	 16
398	 10	75.3	14.8	 12
399	 10	63.0	11.3	 16
400	 10	56.0	9.5	 16
401	 10	77.3	11.0	 16
402	 10	58.8	9.2	 16
403	 10	58.0	12.0	 16
404	 10	81.3	13.9	 16
405	 10	106.0	12.0	 16
406	 10	63.3	11.8	 16
407	 10	64.0	15.3	 16
408	 10	63.3	14.2	 16
409	 10	109.5	26.1	 16
410	 10	54.0	11.7	 16
411	 10	318.5	39.3	 16
412	 10	90.3	12.4	 16
413	 10	83.3	16.4	 16
414	 10	144.3	65.8	 16
415	 10	65.5	11.8	 16
416	 10	104.3	13.3	 16
417	 10	54.3	7.5	 16
418	 10	59.8	13.1	 16
419	 10	88.8	12.6	 16
420	 10	202.0	32.3	 16
421	 10	67.0	12.5	 16
422	 10	54.5	7.6	 16
423	 10	148.5	30.2	 16
424	 10	78.8	11.7	 16
425	 10	54.3	5.4	 16
426	 10	50.5	10.5	 16
427	 10	80.3	17.9	 16
428	 10	70.8	11.8	 16
429	 10	56.3	12.4	 20
430	 10	50.3	11.9	 16
431	 10	66.3	16.1	 16
432	 10	61.0	14.3	 16
433	 10	63.3	11.8	 16
434	 10	60.5	11.9	 16
435	 10	53.5	10.3	 16
436	 10	54.8	8.6	 16
437	 10	70.0	16.7	 16
438	 10	770.8	184.4	 16
439	 10	81.0	19.0	 16
440	 10	86.3	15.0	 16
441	 10	83.0	15.0	 16
442	 10	308.3	78.1	 16
443	 10	126.0	20.8	 16
444	 10	67.3	18.6	 16
445	 10	79.8	14.8	 16
446	 10	59.3	11.9	 16
447	 10	55.0	9.3	 16
448	 10	56.3	6.9	 16
449	 10	59.3	16.7	 16
450	 10	102.0	19.1	 16
451	 10	110.5	20.0	 16
452	 10	94.5	19.2	 16
453	 10	148.0	19.6	 16
454	 10	708.5	158.2	 16
455	 10	109.3	15.1	 16
456	 10	92.8	11.4	 16
457	 10	53.3	9.5	 16
458	 10	75.5	17.7	 16
459	 10	55.0	10.8	 16
460	 10	370.0	76.4	 16
461	 10	52.5	14.9	 16
462	 10	65.8	10.0	 16
463	 10	80.5	11.8	 16
464	 10	60.8	9.1	 16
465	 10	80.5	15.4	 16
466	 10	310.3	48.6	 16
467	 10	59.5	10.6	 16
468	 10	56.5	8.0	 16
469	 10	73.3	15.2	 16
470	 10	61.3	9.7	 16
471	 10	60.5	10.6	 16
472	 10	143.0	45.6	 16
473	 10	78.5	8.4	 16
474	 10	83.3	16.4	 16
475	 10	78.3	14.6	 16
476	 10	62.5	11.0	 16
477	 10	71.8	12.4	 16
478	 10	69.3	14.7	 16
479	 10	57.3	7.8	 16
480	 10	79.5	17.6	 16
481	 10	62.0	12.9	 16
482	 10	57.5	10.2	 16
483	 10	54.8	9.4	 16
484	 10	185.8	41.8	 16
485	 10	75.3	17.0	 16
486	 10	268.5	54.0	 16
487	 10	73.3	15.1	 16
488	 10	67.8	10.5	 16
489	 10	57.0	10.2	 16
490	 10	65.5	10.5	 16
491	 10	57.8	11.3	 16
492	 10	80.5	15.1	 16
493	 10	261.8	40.6	 16
494	 10	523.0	66.4	 16
495	 10	286.3	44.2	 16
496	 10	291.8	30.6	 16
497	 10	552.5	59.3	 16
498	 10	218.5	23.9	 16
499	 10	253.8	46.5	 16
500	 10	66.3	12.0	 16
501	 10	63.3	10.0	 16
502	 10	73.3	16.4	 16
503	 10	110.0	18.3	 16
504	 10	82.3	13.5	 16
505	 10	107.5	18.3	 16
506	 10	915.5	142.7	 16
507	 10	76.5	9.8	 16
508	 10	280.0	63.3	 16
509	 10	62.8	12.4	 16
510	 10	118.8	19.2	 16
511	 10	89.0	17.5	 16
512	 10	54.5	10.1	 16
513	 10	53.0	8.1	 16
514	 10	90.3	12.3	 16
515	 10	49.8	12.0	 16
516	 10	57.5	8.3	 16
517	 10	53.8	12.3	 16
518	 10	51.3	11.5	 16
519	 10	74.8	11.6	 16
520	 10	87.3	13.7	 16
521	 10	62.3	13.6	 16
522	 10	100.3	20.9	 16
523	 10	48.3	9.0	 16
524	 10	49.0	6.6	 16
525	 10	93.8	18.3	 16
526	 10	92.3	15.7	 16
527	 10	81.3	13.3	 16
528	 10	73.5	12.7	 16
529	 10	64.8	11.9	 16
530	 10	177.3	28.4	 16
531	 10	58.3	8.7	 16
532	 10	51.8	11.9	 16
533	 10	60.5	11.4	 16
534	 10	59.3	9.5	 16
535	 10	83.3	13.3	 16
536	 10	73.3	10.8	 16
537	 10	88.3	14.6	 16
538	 10	74.3	14.5	 16
539	 10	69.3	13.9	 16
540	 10	101.8	17.3	 16
541	 10	84.0	15.2	 16
542	 10	57.5	10.9	 16
543	 10	66.8	10.1	 16
544	 10	65.0	14.2	 16
545	 10	103.5	17.8	 16
546	 10	233.3	218.5	 16
547	 10	258.0	44.3	 20
548	 10	84.8	14.2	 16
549	 10	108.3	18.7	 16
550	 10	128.8	30.1	 16
551	 10	355.3	41.6	 16
552	 10	209.3	34.3	 16
553	 10	201.5	27.3	 16
554	 10	79.3	12.0	 16
555	 10	54.8	12.0	 16
556	 10	62.5	12.7	 16
557	 10	76.3	13.8	 16
558	 10	56.5	9.8	 16
559	 10	74.3	12.8	 16
560	 10	65.0	11.6	 16
561	 10	178.5	26.2	 16
562	 10	53.3	8.5	 16
563	 10	78.5	12.3	 16
564	 10	130.8	18.7	 16
565	 10	203.3	38.6	 16
566	 10	485.3	97.5	 16
567	 10	59.5	8.7	 16
568	 10	49.5	10.5	 16
569	 10	133.0	14.5	 16
570	 10	211.0	24.5	 16
571	 10	499.0	91.8	 16
572	 10	270.8	37.7	 16
573	 10	97.5	16.1	 16
574	 10	200.3	29.3	 16
575	 10	156.0	25.9	 16
576	 10	129.5	19.9	 16
577	 10	75.3	10.6	 16
578	 10	87.8	30.9	 16
579	 10	51.3	8.3	 16
580	 10	88.0	13.0	 16
581	 10	96.0	13.2	 16
582	 10	128.5	17.7	 16
583	 10	62.3	9.9	 16
584	 10	60.8	11.4	 16
585	 10	91.8	15.8	 16
586	 10	75.5	16.7	 16
587	 10	49.5	7.8	 16
588	 10	85.3	23.5	 16
589	 10	72.5	15.5	 16
590	 10	87.5	18.5	 16
591	 10	81.8	17.1	 16
592	 10	62.5	18.2	 16
593	 10	74.8	10.4	 16
594	 10	80.3	11.3	 16
595	 10	126.0	15.3	 16
596	 10	174.3	28.7	 16
597	 10	181.0	22.5	 16
598	 10	153.0	29.9	 16
599	 10	170.8	25.4	 16
600	 10	176.0	24.7	 16
601	 10	109.3	12.1	 16
602	 10	73.0	12.5	 16
603	 10	97.5	21.3	 16
604	 10	56.3	10.1	 16
605	 10	73.0	15.8	 16
606	 10	299.5	37.1	 16
607	 10	67.3	16.6	 16
608	 10	61.3	8.1	 16
609	 10	54.0	11.0	 16
610	 10	157.0	28.3	 16
611	 10	132.5	24.6	 16
612	 10	76.0	13.8	 16
613	 10	557.0	78.2	 16
614	 10	70.5	16.6	 16
615	 10	68.5	12.0	 16
616	 10	84.0	13.1	 16
617	 10	202.8	29.3	 16
618	 10	168.5	28.0	 16
619	 10	59.0	9.7	 16
620	 10	89.8	14.9	 16
621	 10	92.8	13.6	 16
622	 10	56.3	9.6	 16
623	 10	87.3	12.2	 16
624	 10	56.0	11.7	 16
625	 10	65.5	14.0	 16
626	 10	50.0	11.7	 16
627	 10	61.0	12.3	 16
628	 10	126.8	13.7	 16
629	 10	81.3	12.4	 16
630	 10	131.5	18.3	 16
631	 10	343.0	34.4	 16
632	 10	272.8	35.5	 16
633	 10	76.8	16.7	 16
634	 10	762.3	72.8	 16
635	 10	309.3	36.3	 16
636	 10	117.8	14.0	 16
637	 10	68.5	14.3	 16
638	 10	66.0	15.1	 16
639	 10	49.3	7.2	 16
640	 10	58.3	10.6	 16
641	 10	646.3	69.3	 16
642	 10	61.8	9.5	 16
643	 10	64.3	14.7	 16
644	 10	119.3	16.2	 16
645	 10	57.3	9.6	 16
646	 10	112.5	16.4	 16
647	 10	136.3	23.2	 16
648	 10	350.8	39.5	 16
649	 10	54.5	11.2	 16
650	 10	63.3	17.0	 16
651	 10	46.5	8.5	 16
652	 10	76.3	12.5	 16
653	 10	292.5	49.4	 16
654	 10	119.5	20.4	 16
655	 10	104.3	11.2	 16
656	 10	69.3	9.5	 16
657	 10	59.3	9.6	 16
658	 10	437.5	42.0	 16
659	 10	63.3	10.7	 16
660	 10	80.5	14.7	 16
661	 10	68.5	12.8	 16
662	 10	61.0	12.4	 16
663	 10	229.8	30.8	 16
664	 10	139.3	20.3	 16
665	 10	98.3	15.4	 16
666	 10	71.8	13.2	 20
667	 10	298.0	30.6	 16
668	 10	171.0	27.5	 16
669	 10	162.0	26.7	 16
670	 10	153.0	16.8	 16
671	 10	127.3	18.0	 16
672	 10	178.8	25.8	 16
673	 10	96.3	17.8	 16
674	 10	94.0	17.8	 16
675	 10	79.0	20.9	 16
676	 10	105.5	15.1	 16
677	 10	152.5	26.9	 16
678	 10	67.0	13.7	 16
679	 10	67.5	10.0	 16
680	 10	519.3	84.6	 16
681	 10	1343.5	98.4	 16
682	 10	1584.5	105.6	 16
683	 10	1723.0	93.7	 16
684	 10	1684.3	297.9	 16
685	 10	150.3	22.0	 16
686	 10	116.8	16.0	 16
687	 10	103.5	19.2	 16
688	 10	62.3	13.1	 16
689	 10	63.3	13.0	 16
690	 10	57.5	9.9	 16
691	 10	217.3	24.0	 16
692	 10	69.5	11.1	 16
693	 10	79.8	18.1	 16
694	 10	73.5	10.7	 16
695	 10	60.3	10.3	 16
696	 10	63.5	11.5	 16
697	 10	136.8	20.3	 16
698	 10	274.8	33.1	 16
699	 10	157.8	25.5	 16
700	 10	99.3	14.9	 16
701	 10	76.3	12.6	 16
702	 10	58.8	8.7	 16
703	 10	61.3	12.3	 16
704	 10	65.3	13.8	 16
705	 10	100.8	26.2	 16
706	 10	86.3	11.3	 16
707	 10	133.0	23.5	 16
708	 10	476.8	78.5	 16
709	 10	499.8	54.4	 16
710	 10	189.0	15.2	 16
711	 10	6838.5	1723.2	 16
  0	 11	110.8	18.5	 16
  1	 11	83.8	15.9	 16
  2	 11	59.5	9.6	 16
  3	 11	96.5	19.2	 16
  4	 11	71.0	11.0	 16
  5	 11	693.8	89.5	 16
  6	 11	66.8	8.0	 16
  7	 11	397.8	43.7	 16
  8	 11	119.0	14.7	 16
  9	 11	69.5	19.4	 16
 10	 11	107.5	18.6	 16
 11	 11	55.3	9.2	 16
 12	 11	95.5	16.0	 16
 13	 11	8622.8	709.3	 16
 14	 11	8242.0	581.8	 16
 15	 11	8164.3	1046.0	 16
 16	 11	108.5	18.9	 16
 17	 11	55.8	11.9	 16
 18	 11	125.8	20.0	 16
 19	 11	9304.5	637.6	 16
 20	 11	8980.0	655.7	 16
 21	 11	8716.5	1541.3	 16
 22	 11	104.5	16.0	 16
 23	 11	59.8	14.4	 16
 24	 11	9000.8	2409.1	 16
 25	 11	91.0	23.8	 16
 26	 11	84.0	11.0	 16
 27	 11	89.0	15.6	 16
 28	 11	7857.0	2068.7	 16
 29	 11	81.5	23.2	 16
 30	 11	103.3	20.3	 16
 31	 11	9053.5	1717.9	 16
 32	 11	8858.5	1642.4	 16
 33	 11	8332.8	1988.2	 16
 34	 11	97.0	19.0	 16
 35	 11	56.5	11.6	 16
 36	 11	112.0	26.6	 16
 37	 11	8481.0	1210.3	 16
 38	 11	8077.0	1126.3	 16
 39	 11	7614.5	1464.8	 16
 40	 11	96.3	15.1	 16
 41	 11	66.5	16.5	 16
 42	 11	8772.8	1794.1	 16
 43	 11	111.0	18.4	 16
 44	 11	91.3	12.0	 16
 45	 11	89.5	18.8	 16
 46	 11	7908.8	1629.2	 16
 47	 11	52.5	7.7	 16
 48	 11	83.0	11.0	 16
 49	 11	102.3	19.6	 16
 50	 11	7547.3	1369.8	 16
 51	 11	86.0	16.6	 16
 52	 11	94.8	16.1	 16
 53	 11	68.0	16.0	 16
 54	 11	8557.8	1588.1	 16
 55	 11	97.0	17.4	 16
 56	 11	82.3	10.7	 16
 57	 11	93.3	18.6	 16
 58	 11	96.3	19.0	 16
 59	 11	49.3	13.1	 16
 60	 11	41.3	7.6	 16
 61	 11	55.8	9.5	 16
 62	 11	8794.0	1263.8	 16
 63	 11	97.3	22.5	 12
 64	 11	85.8	19.4	 16
 65	 11	105.5	28.2	 16
 66	 11	7450.3	1551.6	 16
 67	 11	65.0	13.6	 16
 68	 11	98.3	17.4	 16
 69	 11	8036.0	1241.9	 16
 70	 11	7548.3	1029.4	 16
 71	 11	7394.0	1280.8	 16
 72	 11	94.0	16.6	 16
 73	 11	48.8	8.9	 16
 74	 11	78.3	16.2	 20
 75	 11	83.0	14.0	 16
 76	 11	87.0	15.7	 16
 77	 11	89.0	14.2	 16
 78	 11	89.3	14.7	 16
 79	 11	52.5	10.2	 16
 80	 11	139.8	69.9	 16
 81	 11	7800.8	639.6	 16
 82	 11	7522.8	632.9	 16
 83	 11	7183.5	2048.2	 16
 84	 11	117.3	24.7	 16
 85	 11	63.3	12.8	 16
 86	 11	98.5	31.6	 16
 87	 11	7557.8	408.3	 16
 88	 11	7686.5	431.4	 16
 89	 11	7239.5	1680.4	 16
 90	 11	102.0	16.8	 16
 91	 11	51.8	9.5	 16
 92	 11	103.8	16.1	 16
 93	 11	7599.8	173.1	 16
 94	 11	7648.8	1495.4	 16
 95	 11	104.3	16.3	 16
 96	 11	84.0	15.4	 16
 97	 11	55.0	10.4	 16
 98	 11	89.8	15.4	 16
 99	 11	7713.0	198.3	 16
100	 11	7571.3	1267.2	 16
101	 11	98.5	18.0	 16
102	 11	80.3	11.8	 16
103	 11	54.0	12.4	 16
104	 11	8121.3	1212.5	 16
105	 11	111.8	21.0	 16
106	 11	81.3	14.1	 16
107	 11	80.0	16.2	 16
108	 11	7546.8	1910.4	 16
109	 11	55.3	14.2	 16
110	 11	47.5	13.1	 16
111	 11	84.5	14.2	 16
112	 11	1956.3	400.8	 16
113	 11	109.3	17.6	 16
114	 11	175.5	24.5	 16
115	 11	195.3	37.6	 16
116	 11	155.3	23.5	 16
117	 11	75.0	12.3	 16
118	 11	62.5	12.2	 16
119	 11	128.3	21.2	 16
120	 11	169.0	22.7	 16
121	 11	237.0	41.3	 16
122	 11	479.3	84.0	 16
123	 11	1041.0	182.5	 16
124	 11	177.3	22.0	 16
125	 11	79.5	17.8	 16
126	 11	88.3	11.9	 16
127	 11	277.3	37.0	 16
128	 11	65.3	12.1	 16
129	 11	113.5	21.0	 16
130	 11	2517.5	492.5	 16
131	 11	83.3	12.9	 16
132	 11	79.8	12.7	 16
133	 11	90.5	9.4	 16
134	 11	183.5	32.2	 16
135	 11	151.3	25.4	 16
136	 11	55.3	9.1	 16
137	 11	55.3	10.1	 16
138	 11	53.3	7.2	 16
139	 11	140.3	18.6	 16
140	 11	71.5	15.4	 16
141	 11	87.0	18.2	 16
142	 11	1128.0	247.8	 16
143	 11	884.3	185.6	 16
144	 11	57.5	10.6	 16
145	 11	64.3	11.4	 16
146	 11	440.3	100.6	 16
147	 11	54.0	13.7	 16
148	 11	69.3	11.8	 16
149	 11	177.3	32.4	 16
150	 11	137.3	34.3	 16
151	 11	113.0	24.4	 16
152	 11	213.5	39.1	 16
153	 11	1634.5	252.3	 16
154	 11	3833.5	463.9	 16
155	 11	807.5	139.3	 16
156	 11	67.0	8.5	 16
157	 11	316.0	27.1	 16
158	 11	575.8	56.9	 16
159	 11	200.0	33.5	 16
160	 11	92.8	11.3	 16
161	 11	653.0	98.5	 16
162	 11	72.3	11.4	 16
163	 11	70.0	16.7	 16
164	 11	59.0	11.1	 16
165	 11	66.0	10.7	 16
166	 11	739.5	77.7	 16
167	 11	75.0	20.9	 16
168	 11	77.0	15.3	 16
169	 11	52.3	8.7	 16
170	 11	581.8	75.7	 16
171	 11	86.5	14.3	 16
172	 11	95.5	12.9	 16
173	 11	99.5	18.4	 16
174	 11	139.5	19.5	 16
175	 11	224.5	38.7	 16
176	 11	107.5	18.5	 16
177	 11	98.3	15.2	 16
178	 11	240.3	37.2	 16
179	 11	138.8	17.6	 16
180	 11	78.5	13.2	 16
181	 11	762.3	101.3	 16
182	 11	386.0	46.8	 16
183	 11	56.3	9.5	 16
184	 11	77.8	16.7	 16
185	 11	67.0	14.5	 16
186	 11	76.0	13.8	 16
187	 11	384.0	42.0	 16
188	 11	327.0	47.5	 16
189	 11	310.0	26.6	 16
190	 11	121.3	12.5	 16
191	 11	100.3	17.7	 16
192	 11	128.5	19.4	 16
193	 11	76.0	18.6	 20
194	 11	130.5	30.5	 16
195	 11	81.0	14.4	 16
196	 11	320.8	70.2	 16
197	 11	124.5	28.7	 16
198	 11	380.3	101.0	 16
199	 11	242.3	49.7	 16
200	 11	67.0	9.2	 16
201	 11	83.0	19.4	 16
202	 11	1185.8	283.7	 16
203	 11	93.3	16.9	 16
204	 11	78.8	15.3	 16
205	 11	136.0	19.8	 16
206	 11	206.0	25.7	 16
207	 11	181.5	24.5	 16
208	 11	251.3	52.7	 16
209	 11	313.0	62.1	 16
210	 11	167.8	23.2	 16
211	 11	81.3	12.3	 16
212	 11	92.0	12.6	 16
213	 11	153.5	23.4	 16
214	 11	201.0	45.5	 16
215	 11	552.5	42.8	 16
216	 11	237.0	47.9	 16
217	 11	83.8	14.3	 16
218	 11	116.3	16.4	 16
219	 11	126.0	26.9	 16
220	 11	66.3	11.8	 16
221	 11	318.0	47.7	 16
222	 11	1775.0	317.3	 16
223	 11	117.5	15.3	 16
224	 11	83.3	14.3	 16
225	 11	458.3	61.7	 16
226	 11	243.3	37.8	 16
227	 11	69.5	14.3	 16
228	 11	75.3	11.0	 16
229	 11	149.0	16.2	 16
230	 11	147.8	22.9	 16
231	 11	212.8	28.9	 16
232	 11	142.0	26.9	 16
233	 11	75.3	10.2	 16
234	 11	77.3	19.2	 16
235	 11	132.8	18.4	 16
236	 11	195.8	27.9	 16
237	 11	104.0	19.0	 16
238	 11	90.3	10.9	 16
239	 11	193.0	39.8	 16
240	 11	1096.5	168.5	 16
241	 11	127.0	20.4	 16
242	 11	656.8	117.2	 16
243	 11	63.3	12.0	 16
244	 11	63.3	14.6	 16
245	 11	156.8	28.7	 16
246	 11	72.8	12.8	 16
247	 11	65.0	9.8	 16
248	 11	751.3	117.1	 16
249	 11	117.8	19.2	 16
250	 11	419.0	81.0	 16
251	 11	91.5	15.0	 16
252	 11	77.8	10.6	 16
253	 11	108.0	17.6	 16
254	 11	86.0	12.8	 16
255	 11	67.3	9.9	 16
256	 11	58.5	10.3	 16
257	 11	68.3	14.2	 16
258	 11	162.5	23.4	 16
259	 11	147.0	22.9	 16
260	 11	81.8	16.2	 16
261	 11	61.5	10.2	 16
262	 11	67.5	11.0	 16
263	 11	218.0	29.9	 16
264	 11	59.3	15.3	 16
265	 11	70.3	12.9	 16
266	 11	209.3	30.4	 16
267	 11	132.3	17.8	 16
268	 11	152.8	19.0	 16
269	 11	179.5	19.1	 16
270	 11	136.0	16.4	 16
271	 11	220.5	27.1	 16
272	 11	68.5	12.9	 16
273	 11	88.0	21.0	 16
274	 11	156.5	26.6	 16
275	 11	86.8	17.2	 16
276	 11	81.0	16.0	 16
277	 11	147.3	24.2	 16
278	 11	523.8	55.0	 16
279	 11	418.5	51.9	 16
280	 11	93.3	13.6	 16
281	 11	77.3	18.4	 16
282	 11	197.0	25.6	 16
283	 11	156.3	21.5	 16
284	 11	58.5	11.6	 16
285	 11	85.0	14.6	 16
286	 11	319.0	21.6	 16
287	 11	477.5	61.2	 16
288	 11	1701.5	179.6	 16
289	 11	467.0	59.0	 16
290	 11	61.3	13.6	 16
291	 11	78.0	12.9	 16
292	 11	226.0	34.6	 16
293	 11	747.8	97.5	 16
294	 11	111.5	13.2	 16
295	 11	434.5	42.2	 16
296	 11	469.3	53.7	 16
297	 11	1648.5	233.0	 16
298	 11	87.8	18.4	 16
299	 11	218.3	32.7	 16
300	 11	191.0	26.7	 16
301	 11	80.5	18.5	 16
302	 11	73.5	11.7	 16
303	 11	170.3	25.1	 16
304	 11	138.5	25.2	 16
305	 11	365.0	50.8	 16
306	 11	112.0	11.0	 16
307	 11	91.8	17.9	 16
308	 11	187.0	27.0	 16
309	 11	283.8	26.9	 16
310	 11	64.8	10.1	 16
311	 11	81.3	14.5	 20
312	 11	82.5	16.9	 16
313	 11	160.0	31.0	 16
314	 11	329.8	121.1	 16
315	 11	71.8	11.4	 16
316	 11	59.3	14.3	 16
317	 11	87.5	11.7	 16
318	 11	65.3	12.7	 16
319	 11	56.3	16.1	 16
320	 11	249.5	77.4	 16
321	 11	81.5	17.6	 16
322	 11	86.5	28.3	 16
323	 11	946.0	243.8	 16
324	 11	179.5	42.8	 16
325	 11	186.8	47.8	 16
326	 11	334.5	92.5	 16
327	 11	84.3	17.0	 16
328	 11	65.5	11.7	 16
329	 11	77.5	13.2	 16
330	 11	718.8	201.9	 16
331	 11	102.0	26.6	 16
332	 11	59.8	10.4	 16
333	 11	83.0	15.8	 16
334	 11	53.8	13.5	 16
335	 11	196.5	42.4	 16
336	 11	61.0	17.3	 16
337	 11	95.3	18.7	 16
338	 11	48.3	5.2	 16
339	 11	216.0	44.8	 16
340	 11	245.8	57.1	 16
341	 11	207.8	32.6	 16
342	 11	247.8	52.9	 16
343	 11	55.3	9.6	 16
344	 11	192.3	31.2	 16
345	 11	81.0	10.7	 16
346	 11	57.3	11.3	 16
347	 11	53.3	10.9	 16
348	 11	62.0	13.2	 16
349	 11	50.5	11.1	 16
350	 11	312.0	60.7	 16
351	 11	69.5	20.8	 16
352	 11	83.0	12.9	 16
353	 11	73.5	11.3	 16
354	 11	135.3	19.2	 16
355	 11	400.0	49.3	 16
356	 11	484.8	72.6	 16
357	 11	318.8	60.8	 16
358	 11	322.0	47.0	 16
359	 11	54.3	11.4	 16
360	 11	81.8	12.5	 16
361	 11	253.8	33.7	 16
362	 11	68.3	15.9	 16
363	 11	79.3	11.7	 16
364	 11	175.5	32.3	 16
365	 11	57.3	11.0	 16
366	 11	48.3	10.1	 16
367	 11	86.3	17.3	 16
368	 11	124.0	18.6	 16
369	 11	93.0	15.1	 16
370	 11	214.8	36.7	 16
371	 11	324.8	49.0	 16
372	 11	119.0	15.0	 16
373	 11	190.8	27.0	 16
374	 11	235.0	27.9	 16
375	 11	304.5	30.4	 16
376	 11	94.8	24.3	 16
377	 11	66.3	11.8	 16
378	 11	389.3	58.7	 16
379	 11	69.5	15.6	 16
380	 11	66.0	7.9	 16
381	 11	121.3	20.2	 16
382	 11	74.5	14.8	 16
383	 11	146.3	23.1	 16
384	 11	77.3	10.1	 16
385	 11	98.3	15.0	 16
386	 11	109.5	18.7	 16
387	 11	118.8	18.3	 16
388	 11	54.8	11.3	 16
389	 11	56.0	10.8	 16
390	 11	112.8	23.8	 16
391	 11	122.0	21.4	 16
392	 11	53.3	10.3	 16
393	 11	165.0	22.7	 16
394	 11	80.3	14.4	 16
395	 11	121.3	17.4	 16
396	 11	228.3	26.1	 16
397	 11	859.0	88.1	 16
398	 11	220.3	28.1	 16
399	 11	269.3	36.1	 16
400	 11	95.3	13.0	 16
401	 11	283.8	33.6	 16
402	 11	65.0	10.3	 16
403	 11	152.3	15.8	 16
404	 11	66.3	21.4	 16
405	 11	83.8	12.1	 16
406	 11	250.3	25.7	 16
407	 11	53.8	11.6	 16
408	 11	63.3	12.9	 16
409	 11	81.3	13.8	 16
410	 11	109.5	16.1	 16
411	 11	72.3	11.9	 16
412	 11	116.8	18.3	 16
413	 11	95.5	16.1	 16
414	 11	64.0	11.1	 16
415	 11	625.3	38.1	 16
416	 11	181.3	27.6	 16
417	 11	244.5	23.5	 16
418	 11	270.3	25.6	 16
419	 11	75.3	5.8	 16
420	 11	59.3	11.0	 16
421	 11	87.0	15.5	 16
422	 11	76.8	15.5	 16
423	 11	264.8	31.8	 16
424	 11	193.8	24.1	 16
425	 11	1655.5	107.0	 16
426	 11	122.3	17.5	 16
427	 11	63.3	10.9	 16
428	 11	144.3	27.3	 16
429	 11	87.0	18.8	 16
430	 11	167.8	39.1	 20
431	 11	56.0	14.4	 16
432	 11	146.8	33.8	 16
433	 11	75.5	13.0	 16
434	 11	66.3	13.8	 16
435	 11	154.3	35.6	 16
436	 11	189.0	40.4	 16
437	 11	236.3	46.6	 16
438	 11	2560.0	658.9	 16
439	 11	151.3	19.3	 16
440	 11	87.0	15.1	 16
441	 11	167.5	34.8	 16
442	 11	97.0	19.9	 16
443	 11	307.5	85.2	 16
444	 11	64.0	13.0	 16
445	 11	244.0	56.5	 16
446	 11	85.8	20.0	 16
447	 11	119.0	28.0	 16
448	 11	64.5	13.2	 16
449	 11	61.3	11.9	 16
450	 11	163.3	41.5	 16
451	 11	135.5	26.8	 16
452	 11	111.5	18.0	 16
453	 11	60.3	10.6	 16
454	 11	76.8	16.4	 16
455	 11	322.5	88.1	 16
456	 11	141.3	25.6	 16
457	 11	171.8	35.4	 16
458	 11	138.5	22.2	 16
459	 11	191.3	31.3	 16
460	 11	264.8	75.8	 16
461	 11	53.0	7.3	 16
462	 11	76.3	14.1	 16
463	 11	245.0	33.9	 16
464	 11	163.3	30.2	 16
465	 11	69.5	12.5	 16
466	 11	97.3	14.8	 16
467	 11	60.0	9.8	 16
468	 11	194.5	27.9	 16
469	 11	823.5	139.4	 16
470	 11	75.0	14.2	 16
471	 11	119.0	26.5	 16
472	 11	217.5	32.7	 16
473	 11	90.8	13.7	 16
474	 11	83.5	16.2	 16
475	 11	75.0	14.4	 16
476	 11	135.8	18.2	 16
477	 11	62.5	14.1	 16
478	 11	113.3	19.2	 16
479	 11	174.0	36.0	 16
480	 11	75.0	11.1	 16
481	 11	538.0	110.4	 16
482	 11	138.5	28.2	 16
483	 11	140.0	30.2	 16
484	 11	60.5	12.9	 16
485	 11	61.5	9.5	 16
486	 11	447.3	107.6	 16
487	 11	158.0	37.2	 16
488	 11	95.8	15.0	 16
489	 11	60.3	11.8	 16
490	 11	85.0	14.8	 16
491	 11	58.3	14.3	 16
492	 11	92.3	11.8	 16
493	 11	70.5	11.9	 16
494	 11	266.5	40.1	 16
495	 11	82.3	18.9	 16
496	 11	499.5	47.1	 16
497	 11	559.5	55.6	 16
498	 11	582.0	76.3	 16
499	 11	253.3	44.2	 16
500	 11	147.0	28.5	 16
501	 11	89.3	15.8	 16
502	 11	61.0	10.6	 16
503	 11	64.3	10.2	 16
504	 11	948.0	161.9	 16
505	 11	89.8	17.0	 16
506	 11	64.8	11.2	 16
507	 11	54.8	8.2	 16
508	 11	62.3	11.5	 16
509	 11	59.3	15.2	 16
510	 11	123.3	16.0	 16
511	 11	143.0	25.8	 16
512	 11	59.0	10.2	 16
513	 11	104.3	18.6	 16
514	 11	103.0	12.8	 16
515	 11	69.0	11.6	 16
516	 11	104.8	18.4	 16
517	 11	430.5	83.3	 16
518	 11	64.8	10.2	 16
519	 11	572.3	106.6	 16
520	 11	1443.8	258.9	 16
521	 11	353.3	48.8	 16
522	 11	74.3	15.8	 16
523	 11	69.5	12.7	 16
524	 11	151.0	22.1	 16
525	 11	56.0	9.4	 16
526	 11	57.0	13.4	 16
527	 11	126.8	31.8	 16
528	 11	65.5	13.8	 16
529	 11	100.3	12.9	 16
530	 11	104.8	18.8	 16
531	 11	51.3	7.2	 16
532	 11	331.5	42.5	 16
533	 11	96.0	18.7	 16
534	 11	85.0	12.8	 16
535	 11	71.0	13.7	 16
536	 11	964.8	113.5	 16
537	 11	979.8	82.3	 16
538	 11	233.5	21.9	 16
539	 11	487.0	47.2	 16
540	 11	1031.5	106.0	 16
541	 11	90.3	14.8	 16
542	 11	72.8	13.4	 16
543	 11	75.8	13.8	 16
544	 11	63.3	12.9	 16
545	 11	331.0	43.0	 16
546	 11	102.0	20.5	 16
547	 11	248.3	45.9	 16
548	 11	154.8	23.0	 16
549	 11	73.3	15.6	 20
550	 11	429.5	98.9	 16
551	 11	187.8	36.8	 16
552	 11	65.5	10.3	 16
553	 11	155.8	27.6	 16
554	 11	1442.8	338.4	 16
555	 11	261.8	51.2	 16
556	 11	537.0	97.8	 16
557	 11	92.3	19.4	 16
558	 11	2934.5	602.3	 16
559	 11	130.8	13.9	 16
560	 11	448.5	66.1	 16
561	 11	781.0	93.1	 16
562	 11	487.5	69.3	 16
563	 11	306.0	56.4	 16
564	 11	400.5	59.1	 16
565	 11	375.0	85.1	 16
566	 11	72.0	15.5	 16
567	 11	119.0	21.7	 16
568	 11	227.8	38.7	 16
569	 11	305.3	42.5	 16
570	 11	3935.5	475.8	 16
571	 11	369.3	62.0	 16
572	 11	52.5	10.1	 16
573	 11	66.5	10.5	 16
574	 11	130.8	20.0	 16
575	 11	102.0	11.5	 16
576	 11	91.0	13.7	 16
577	 11	119.0	17.0	 16
578	 11	119.5	13.9	 16
579	 11	769.8	61.1	 16
580	 11	91.8	16.5	 16
581	 11	809.8	83.7	 16
582	 11	97.5	20.8	 16
583	 11	133.0	20.1	 16
584	 11	60.3	11.7	 16
585	 11	135.5	15.6	 16
586	 11	113.5	16.6	 16
587	 11	299.3	28.8	 16
588	 11	73.3	73.5	 16
589	 11	854.3	75.9	 16
590	 11	116.5	20.5	 16
591	 11	132.5	19.0	 16
592	 11	203.5	31.4	 16
593	 11	82.0	12.1	 16
594	 11	439.0	44.5	 16
595	 11	139.5	21.3	 16
596	 11	907.0	109.3	 16
597	 11	310.5	42.1	 16
598	 11	125.5	17.6	 16
599	 11	161.8	20.7	 16
600	 11	67.3	12.7	 16
601	 11	125.3	14.4	 16
602	 11	149.3	30.1	 16
603	 11	124.5	19.3	 16
604	 11	144.5	27.1	 16
605	 11	66.0	11.7	 16
606	 11	124.5	15.8	 16
607	 11	52.3	10.0	 16
608	 11	65.0	12.6	 16
609	 11	112.5	20.5	 16
610	 11	59.5	8.9	 16
611	 11	721.0	95.5	 16
612	 11	522.8	60.2	 16
613	 11	234.3	36.5	 16
614	 11	376.5	33.0	 16
615	 11	118.5	25.0	 16
616	 11	100.3	14.9	 16
617	 11	81.0	15.5	 16
618	 11	78.3	13.3	 16
619	 11	377.5	48.9	 16
620	 11	55.8	8.6	 16
621	 11	56.3	12.9	 16
622	 11	68.3	11.0	 16
623	 11	51.8	10.4	 16
624	 11	135.3	16.3	 16
625	 11	86.3	16.5	 16
626	 11	121.3	23.6	 16
627	 11	907.5	96.2	 16
628	 11	113.3	16.3	 16
629	 11	60.3	12.7	 16
630	 11	102.5	18.3	 16
631	 11	401.5	48.2	 16
632	 11	360.0	40.1	 16
633	 11	120.5	18.8	 16
634	 11	268.5	27.8	 16
635	 11	76.0	12.8	 16
636	 11	58.0	8.7	 16
637	 11	299.8	58.5	 16
638	 11	159.5	24.5	 16
639	 11	58.3	8.6	 16
640	 11	110.3	17.1	 16
641	 11	108.0	14.8	 16
642	 11	85.5	10.6	 16
643	 11	519.3	77.9	 16
644	 11	164.5	19.4	 16
645	 11	83.3	17.6	 16
646	 11	73.5	13.6	 16
647	 11	71.5	12.8	 16
648	 11	179.0	31.1	 16
649	 11	283.5	40.5	 16
650	 11	68.0	12.9	 16
651	 11	267.3	33.0	 16
652	 11	167.5	27.5	 16
653	 11	59.3	13.8	 16
654	 11	50.5	8.4	 16
655	 11	190.8	31.6	 16
656	 11	69.5	12.7	 16
657	 11	47.0	8.1	 16
658	 11	385.3	53.4	 16
659	 11	89.5	13.6	 16
660	 11	138.3	20.6	 16
661	 11	57.0	9.2	 16
662	 11	76.0	14.6	 16
663	 11	1928.3	205.7	 16
664	 11	1390.0	170.9	 16
665	 11	367.3	45.4	 16
666	 11	415.0	49.5	 16
667	 11	71.5	12.1	 16
668	 11	160.3	25.8	 20
669	 11	655.8	103.5	 16
670	 11	453.0	86.7	 16
671	 11	1803.3	355.5	 16
672	 11	293.5	48.0	 16
673	 11	81.8	16.3	 16
674	 11	87.5	16.6	 16
675	 11	217.0	37.1	 16
676	 11	67.0	10.3	 16
677	 11	711.3	120.0	 16
678	 11	718.3	139.8	 16
679	 11	166.5	19.2	 16
680	 11	204.3	36.2	 16
681	 11	109.5	19.3	 16
682	 11	1495.3	318.6	 16
683	 11	173.5	20.8	 16
684	 11	931.5	183.7	 16
685	 11	183.0	19.7	 16
686	 11	160.5	28.4	 16
687	 11	80.5	15.4	 16
688	 11	97.0	16.2	 16
689	 11	69.3	12.5	 16
690	 11	63.0	14.9	 16
691	 11	55.3	7.5	 16
692	 11	83.8	15.1	 16
693	 11	58.0	14.0	 16
694	 11	175.3	24.1	 16
695	 11	113.0	17.8	 16
696	 11	63.5	9.2	 16
697	 11	1294.0	174.9	 16
698	 11	497.0	64.2	 16
699	 11	910.5	88.9	 16
700	 11	137.5	26.7	 16
701	 11	245.3	18.5	 16
702	 11	640.3	78.6	 16
703	 11	443.8	62.5	 16
704	 11	71.3	14.7	 16
705	 11	513.5	68.6	 16
706	 11	314.3	47.7	 16
707	 11	101.5	20.5	 16
708	 11	127.3	25.5	 16
709	 11	144.5	21.4	 16
710	 11	491.3	108.2	 16
711	 11	101.3	14.7	 16
  0	 12	9006.5	1014.9	 16
  1	 12	106.0	49.8	 16
  2	 12	56.5	8.0	 16
  3	 12	84.0	19.4	 16
  4	 12	54.3	11.6	 16
  5	 12	88.0	15.5	 16
  6	 12	55.0	10.0	 16
  7	 12	160.3	19.7	 16
  8	 12	122.8	16.9	 16
  9	 12	57.3	10.0	 16
 10	 12	57.5	7.2	 16
 11	 12	43.8	7.2	 16
 12	 12	41.3	3.8	 16
 13	 12	57.0	11.0	 16
 14	 12	49.0	12.9	 16
 15	 12	57.8	12.9	 16
 16	 12	52.5	12.8	 16
 17	 12	51.8	7.5	 16
 18	 12	51.8	9.5	 16
 19	 12	75.5	15.5	 16
 20	 12	79.5	16.4	 16
 21	 12	67.5	14.6	 16
 22	 12	46.5	8.7	 16
 23	 12	37.5	4.5	 16
 24	 12	44.0	8.0	 16
 25	 12	51.3	13.2	 16
 26	 12	45.3	7.0	 16
 27	 12	50.0	8.1	 16
 28	 12	46.5	9.0	 16
 29	 12	47.5	7.1	 16
 30	 12	46.3	11.0	 16
 31	 12	45.0	6.7	 16
 32	 12	48.3	8.6	 16
 33	 12	50.8	13.1	 16
 34	 12	54.3	9.5	 16
 35	 12	54.0	10.2	 16
 36	 12	57.5	13.6	 16
 37	 12	51.3	9.1	 16
 38	 12	55.5	10.3	 16
 39	 12	46.8	7.0	 16
 40	 12	46.3	15.4	 16
 41	 12	47.8	9.1	 16
 42	 12	52.5	11.5	 16
 43	 12	48.3	9.2	 16
 44	 12	47.5	9.5	 16
 45	 12	52.3	8.6	 16
 46	 12	49.0	8.5	 16
 47	 12	53.0	9.6	 16
 48	 12	44.3	11.2	 16
 49	 12	54.0	11.6	 16
 50	 12	64.3	15.3	 16
 51	 12	45.3	19.6	 16
 52	 12	49.0	8.9	 16
 53	 12	44.3	8.1	 16
 54	 12	54.3	11.9	 16
 55	 12	48.5	8.2	 16
 56	 12	42.0	12.6	 16
 57	 12	44.8	11.0	 16
 58	 12	43.3	9.4	 16
 59	 12	54.3	13.8	 16
 60	 12	43.5	10.1	 16
 61	 12	46.3	8.1	 16
 62	 12	46.5	13.5	 16
 63	 12	47.8	9.2	 16
 64	 12	49.3	12.1	 16
 65	 12	53.0	11.8	 16
 66	 12	59.3	13.1	 16
 67	 12	48.0	11.2	 16
 68	 12	39.3	6.7	 16
 69	 12	55.3	11.3	 16
 70	 12	46.0	8.9	 16
 71	 12	46.0	12.3	 16
 72	 12	46.3	6.3	 16
 73	 12	43.3	8.2	 16
 74	 12	44.0	6.9	 16
 75	 12	50.5	14.9	 20
 76	 12	49.3	4.2	 16
 77	 12	46.0	8.5	 16
 78	 12	50.3	10.5	 16
 79	 12	50.0	8.7	 16
 80	 12	54.8	9.6	 16
 81	 12	48.5	10.1	 16
 82	 12	54.8	8.7	 16
 83	 12	52.5	14.0	 16
 84	 12	50.0	8.0	 16
 85	 12	49.5	9.8	 16
 86	 12	44.5	8.9	 16
 87	 12	66.5	14.3	 16
 88	 12	81.3	11.4	 16
 89	 12	60.3	9.3	 16
 90	 12	49.3	9.5	 16
 91	 12	45.5	10.4	 16
 92	 12	41.8	8.5	 16
 93	 12	50.8	8.7	 16
 94	 12	51.0	7.7	 16
 95	 12	41.5	7.9	 16
 96	 12	37.8	8.9	 16
 97	 12	44.5	10.2	 16
 98	 12	42.3	7.8	 16
 99	 12	47.0	11.9	 16
100	 12	58.5	12.0	 16
101	 12	40.8	9.5	 16
102	 12	44.3	6.8	 16
103	 12	43.3	8.3	 16
104	 12	44.8	9.1	 16
105	 12	46.5	12.5	 16
106	 12	42.3	9.3	 16
107	 12	49.0	8.6	 16
108	 12	51.3	11.5	 16
109	 12	46.3	8.8	 16
110	 12	42.0	7.6	 16
111	 12	62.5	11.1	 16
112	 12	195.0	51.1	 16
113	 12	379.0	57.9	 16
114	 12	146.3	18.7	 16
115	 12	145.3	27.3	 16
116	 12	149.8	31.2	 16
117	 12	52.5	14.2	 16
118	 12	66.3	13.8	 16
119	 12	78.3	13.0	 16
120	 12	97.0	26.2	 16
121	 12	88.0	14.5	 16
122	 12	90.3	15.3	 16
123	 12	211.0	47.8	 16
124	 12	198.8	21.4	 16
125	 12	71.5	16.3	 16
126	 12	75.8	10.9	 16
127	 12	110.3	22.8	 16
128	 12	66.3	11.2	 16
129	 12	93.5	12.9	 16
130	 12	237.8	38.2	 16
131	 12	68.3	12.5	 16
132	 12	76.3	19.0	 16
133	 12	82.3	16.4	 16
134	 12	74.5	12.8	 16
135	 12	143.8	31.4	 16
136	 12	51.3	8.8	 16
137	 12	58.5	8.2	 16
138	 12	50.5	9.4	 16
139	 12	55.8	13.0	 16
140	 12	59.5	13.9	 16
141	 12	101.3	14.3	 16
142	 12	296.3	64.2	 16
143	 12	245.8	53.3	 16
144	 12	59.3	7.5	 16
145	 12	66.3	14.7	 16
146	 12	70.3	10.8	 16
147	 12	55.0	11.0	 16
148	 12	60.3	10.9	 16
149	 12	78.8	16.6	 16
150	 12	68.0	9.8	 16
151	 12	150.8	19.2	 16
152	 12	88.3	15.0	 16
153	 12	202.5	30.1	 16
154	 12	849.0	132.5	 16
155	 12	74.5	11.9	 16
156	 12	58.5	12.2	 16
157	 12	125.0	13.2	 16
158	 12	467.5	50.2	 16
159	 12	121.3	15.9	 16
160	 12	73.8	8.6	 16
161	 12	159.0	20.2	 16
162	 12	59.8	9.0	 16
163	 12	57.3	11.4	 16
164	 12	57.0	10.4	 16
165	 12	78.3	16.1	 16
166	 12	122.5	19.1	 16
167	 12	53.8	8.5	 16
168	 12	53.0	8.7	 16
169	 12	53.3	13.4	 16
170	 12	149.5	30.9	 16
171	 12	57.5	11.4	 16
172	 12	90.3	14.9	 16
173	 12	66.5	13.1	 16
174	 12	58.0	8.1	 16
175	 12	86.0	18.9	 16
176	 12	109.5	12.7	 16
177	 12	113.0	18.4	 16
178	 12	98.5	18.6	 16
179	 12	86.3	14.5	 16
180	 12	85.0	12.4	 16
181	 12	202.0	26.2	 16
182	 12	106.0	19.5	 16
183	 12	52.3	11.6	 16
184	 12	74.3	18.7	 16
185	 12	69.3	14.5	 16
186	 12	65.3	11.4	 16
187	 12	205.3	26.9	 16
188	 12	92.3	17.8	 16
189	 12	120.3	21.6	 16
190	 12	78.3	16.8	 16
191	 12	70.0	11.2	 16
192	 12	113.5	17.2	 16
193	 12	67.5	14.3	 16
194	 12	144.0	33.9	 20
195	 12	54.5	11.3	 16
196	 12	91.8	23.5	 16
197	 12	60.3	8.8	 16
198	 12	91.8	16.0	 16
199	 12	293.0	48.5	 16
200	 12	59.3	7.0	 16
201	 12	87.3	13.4	 16
202	 12	149.0	30.9	 16
203	 12	54.3	9.1	 16
204	 12	79.3	14.9	 16
205	 12	181.0	33.2	 16
206	 12	272.8	21.2	 16
207	 12	242.0	20.8	 16
208	 12	150.0	26.8	 16
209	 12	109.8	18.7	 16
210	 12	88.0	14.7	 16
211	 12	86.0	16.4	 16
212	 12	130.3	23.9	 16
213	 12	125.8	15.3	 16
214	 12	180.3	49.3	 16
215	 12	454.0	40.5	 16
216	 12	315.3	53.6	 16
217	 12	84.3	19.3	 16
218	 12	65.3	9.8	 16
219	 12	85.5	10.9	 16
220	 12	54.5	9.0	 16
221	 12	109.3	15.8	 16
222	 12	555.5	106.9	 16
223	 12	88.0	17.3	 16
224	 12	53.5	7.5	 16
225	 12	97.0	10.3	 16
226	 12	79.0	12.6	 16
227	 12	63.5	9.2	 16
228	 12	62.0	11.0	 16
229	 12	177.5	26.4	 16
230	 12	199.3	25.6	 16
231	 12	132.5	22.6	 16
232	 12	95.0	15.2	 16
233	 12	89.3	18.1	 16
234	 12	75.5	13.3	 16
235	 12	127.3	15.6	 16
236	 12	121.5	14.7	 16
237	 12	87.3	13.2	 16
238	 12	96.0	16.2	 16
239	 12	96.8	21.5	 16
240	 12	152.0	27.1	 16
241	 12	77.5	12.1	 16
242	 12	102.8	15.3	 16
243	 12	66.8	11.6	 16
244	 12	73.8	10.8	 16
245	 12	74.8	12.0	 16
246	 12	55.5	7.1	 16
247	 12	67.3	14.8	 16
248	 12	87.5	11.5	 16
249	 12	65.3	10.7	 16
250	 12	89.5	16.5	 16
251	 12	84.0	14.5	 16
252	 12	70.3	9.0	 16
253	 12	97.3	14.9	 16
254	 12	68.0	13.2	 16
255	 12	53.5	10.5	 16
256	 12	61.8	15.2	 16
257	 12	52.8	9.7	 16
258	 12	100.5	24.2	 16
259	 12	108.3	21.2	 16
260	 12	86.3	13.8	 16
261	 12	68.0	12.6	 16
262	 12	70.3	12.0	 16
263	 12	93.5	18.3	 16
264	 12	58.0	9.5	 16
265	 12	67.5	14.7	 16
266	 12	282.5	26.0	 16
267	 12	118.3	22.0	 16
268	 12	99.8	15.2	 16
269	 12	125.5	21.7	 16
270	 12	118.0	20.9	 16
271	 12	119.8	24.5	 16
272	 12	61.8	12.0	 16
273	 12	58.3	9.2	 16
274	 12	123.3	17.7	 16
275	 12	144.0	17.9	 16
276	 12	67.0	13.1	 16
277	 12	70.5	10.4	 16
278	 12	100.0	22.2	 16
279	 12	127.3	22.9	 16
280	 12	64.3	10.3	 16
281	 12	97.5	14.7	 16
282	 12	157.5	20.7	 16
283	 12	74.3	14.5	 16
284	 12	65.5	12.9	 16
285	 12	56.3	10.4	 16
286	 12	123.0	24.3	 16
287	 12	96.8	21.6	 16
288	 12	319.5	44.7	 16
289	 12	144.0	15.0	 16
290	 12	59.5	10.0	 16
291	 12	66.0	9.4	 16
292	 12	89.8	12.6	 16
293	 12	106.3	15.1	 16
294	 12	68.0	11.0	 16
295	 12	169.5	27.1	 16
296	 12	202.3	25.2	 16
297	 12	146.8	29.5	 16
298	 12	71.0	10.4	 16
299	 12	137.3	16.9	 16
300	 12	110.8	19.2	 16
301	 12	93.5	11.8	 16
302	 12	96.5	18.1	 16
303	 12	120.5	16.0	 16
304	 12	126.8	24.9	 16
305	 12	581.8	45.3	 16
306	 12	123.8	12.8	 16
307	 12	92.0	14.2	 16
308	 12	154.3	21.4	 16
309	 12	314.0	44.3	 16
310	 12	63.3	11.2	 16
311	 12	81.0	10.8	 16
312	 12	59.8	10.0	 16
313	 12	253.0	78.4	 20
314	 12	73.0	18.3	 16
315	 12	64.3	11.0	 16
316	 12	53.3	6.3	 16
317	 12	72.5	16.2	 16
318	 12	57.3	10.0	 16
319	 12	63.8	11.6	 16
320	 12	59.3	10.0	 16
321	 12	64.0	9.9	 16
322	 12	59.5	13.3	 16
323	 12	230.8	27.2	 16
324	 12	205.8	47.1	 16
325	 12	62.8	11.6	 16
326	 12	93.3	16.1	 16
327	 12	66.8	8.4	 16
328	 12	69.5	21.4	 16
329	 12	76.8	16.1	 16
330	 12	155.8	36.2	 16
331	 12	71.0	12.1	 16
332	 12	49.8	6.7	 16
333	 12	69.8	9.3	 16
334	 12	58.3	7.4	 16
335	 12	111.5	25.1	 16
336	 12	50.8	6.1	 16
337	 12	62.8	15.7	 16
338	 12	52.5	9.7	 16
339	 12	67.5	10.0	 16
340	 12	76.0	15.7	 16
341	 12	122.5	19.7	 16
342	 12	117.3	26.9	 16
343	 12	56.3	8.6	 16
344	 12	74.8	15.9	 16
345	 12	68.8	15.1	 16
346	 12	66.3	18.0	 16
347	 12	50.8	7.8	 16
348	 12	67.0	13.7	 16
349	 12	52.3	8.0	 16
350	 12	354.8	56.2	 16
351	 12	57.0	9.6	 16
352	 12	81.0	17.7	 16
353	 12	125.8	19.8	 16
354	 12	146.8	24.6	 16
355	 12	217.8	28.1	 16
356	 12	195.3	25.9	 16
357	 12	73.8	12.0	 16
358	 12	76.3	17.5	 16
359	 12	59.0	8.1	 16
360	 12	94.3	14.3	 16
361	 12	341.3	51.5	 16
362	 12	66.8	12.7	 16
363	 12	55.3	16.5	 16
364	 12	67.3	13.4	 16
365	 12	57.5	10.5	 16
366	 12	59.3	6.7	 16
367	 12	56.3	9.3	 16
368	 12	64.3	7.6	 16
369	 12	94.5	14.7	 16
370	 12	88.8	12.1	 16
371	 12	229.5	25.4	 16
372	 12	166.5	21.4	 16
373	 12	63.0	11.8	 16
374	 12	61.5	9.0	 16
375	 12	163.0	16.2	 16
376	 12	63.8	10.4	 16
377	 12	70.0	15.8	 16
378	 12	86.8	15.4	 16
379	 12	53.8	11.5	 16
380	 12	59.3	9.1	 16
381	 12	83.3	12.0	 16
382	 12	90.3	13.9	 16
383	 12	64.0	11.8	 16
384	 12	101.0	17.5	 16
385	 12	49.3	10.4	 16
386	 12	64.5	13.8	 16
387	 12	54.0	16.2	 16
388	 12	47.8	7.4	 16
389	 12	56.8	15.1	 16
390	 12	78.0	18.9	 16
391	 12	53.5	12.2	 16
392	 12	49.5	7.2	 16
393	 12	65.5	11.4	 16
394	 12	74.3	15.0	 16
395	 12	66.0	12.1	 16
396	 12	142.0	26.0	 16
397	 12	326.0	43.8	 16
398	 12	181.5	20.5	 16
399	 12	95.8	8.7	 16
400	 12	102.8	14.9	 16
401	 12	90.0	14.7	 16
402	 12	63.8	13.8	 16
403	 12	60.0	10.7	 16
404	 12	63.0	10.6	 16
405	 12	57.3	11.7	 16
406	 12	66.8	11.5	 16
407	 12	53.5	10.3	 16
408	 12	60.0	10.7	 16
409	 12	122.5	16.9	 16
410	 12	173.5	26.3	 16
411	 12	71.8	12.4	 16
412	 12	74.3	12.5	 16
413	 12	64.0	13.6	 16
414	 12	61.5	8.7	 16
415	 12	121.8	15.8	 16
416	 12	95.5	12.7	 16
417	 12	91.3	20.5	 16
418	 12	162.5	29.7	 16
419	 12	73.3	13.7	 16
420	 12	44.0	8.1	 16
421	 12	112.3	14.2	 16
422	 12	58.8	13.1	 16
423	 12	95.0	28.3	 16
424	 12	286.8	37.2	 16
425	 12	349.0	28.7	 16
426	 12	157.0	32.2	 16
427	 12	66.8	11.2	 16
428	 12	63.5	14.3	 16
429	 12	83.3	17.5	 16
430	 12	95.0	18.6	 16
431	 12	57.8	8.8	 20
432	 12	61.5	7.9	 16
433	 12	65.8	14.8	 16
434	 12	53.3	9.8	 16
435	 12	71.3	15.4	 16
436	 12	65.0	12.6	 16
437	 12	93.3	25.1	 16
438	 12	595.3	128.1	 16
439	 12	81.0	16.3	 16
440	 12	71.0	15.2	 12
441	 12	192.5	43.3	 16
442	 12	65.0	15.1	 16
443	 12	116.3	22.5	 16
444	 12	61.8	15.3	 16
445	 12	167.5	31.5	 16
446	 12	54.0	12.6	 16
447	 12	79.5	14.1	 16
448	 12	68.5	13.1	 16
449	 12	69.5	11.9	 16
450	 12	92.3	18.6	 16
451	 12	82.8	12.5	 16
452	 12	68.5	12.1	 16
453	 12	51.5	7.5	 16
454	 12	86.3	17.0	 16
455	 12	57.5	12.7	 16
456	 12	79.5	13.6	 16
457	 12	147.8	25.6	 16
458	 12	125.3	23.8	 16
459	 12	92.0	17.8	 16
460	 12	61.5	12.8	 16
461	 12	85.3	12.6	 16
462	 12	133.8	36.0	 16
463	 12	318.3	31.4	 16
464	 12	99.3	18.1	 16
465	 12	56.0	9.2	 16
466	 12	66.5	12.8	 16
467	 12	53.3	8.0	 16
468	 12	71.3	13.9	 16
469	 12	227.8	25.2	 16
470	 12	116.3	19.8	 16
471	 12	182.0	29.4	 16
472	 12	168.5	25.6	 16
473	 12	70.0	11.7	 16
474	 12	60.5	9.9	 16
475	 12	56.3	12.3	 16
476	 12	76.5	11.5	 16
477	 12	56.8	9.8	 16
478	 12	78.5	14.8	 16
479	 12	71.3	12.9	 16
480	 12	82.8	14.2	 16
481	 12	179.3	33.2	 16
482	 12	65.3	10.2	 16
483	 12	58.0	8.8	 16
484	 12	50.3	8.6	 16
485	 12	52.3	10.7	 16
486	 12	122.5	26.5	 16
487	 12	64.5	11.4	 16
488	 12	65.3	12.8	 16
489	 12	56.0	10.8	 16
490	 12	61.0	9.7	 16
491	 12	61.5	13.6	 16
492	 12	70.0	15.0	 16
493	 12	67.3	13.6	 16
494	 12	333.0	52.2	 16
495	 12	113.8	38.1	 16
496	 12	2733.8	203.2	 16
497	 12	2869.5	234.0	 16
498	 12	2779.0	342.7	 16
499	 12	238.0	42.5	 16
500	 12	79.5	16.2	 16
501	 12	72.3	14.8	 16
502	 12	59.3	12.2	 16
503	 12	58.5	13.3	 16
504	 12	123.3	20.5	 16
505	 12	61.3	12.0	 16
506	 12	57.3	10.0	 16
507	 12	56.0	12.6	 16
508	 12	63.5	8.0	 16
509	 12	61.8	9.2	 16
510	 12	142.8	52.1	 16
511	 12	154.8	26.6	 16
512	 12	72.0	12.0	 16
513	 12	115.5	17.7	 16
514	 12	129.8	18.5	 16
515	 12	72.8	10.5	 16
516	 12	76.3	17.1	 16
517	 12	78.3	12.8	 16
518	 12	70.8	12.8	 16
519	 12	88.0	14.5	 16
520	 12	100.5	21.3	 16
521	 12	129.8	29.2	 16
522	 12	63.5	15.7	 16
523	 12	53.0	7.4	 16
524	 12	273.5	53.6	 16
525	 12	53.5	8.7	 16
526	 12	52.5	12.2	 16
527	 12	60.3	8.4	 16
528	 12	57.3	13.0	 16
529	 12	138.5	26.0	 16
530	 12	69.0	19.9	 16
531	 12	56.0	10.0	 16
532	 12	59.3	9.5	 16
533	 12	98.5	20.9	 16
534	 12	58.8	11.3	 16
535	 12	62.3	9.0	 16
536	 12	211.0	31.9	 16
537	 12	208.8	32.0	 16
538	 12	134.0	27.7	 16
539	 12	274.5	30.3	 16
540	 12	277.8	44.6	 16
541	 12	126.3	26.9	 16
542	 12	123.0	29.1	 16
543	 12	69.0	13.4	 16
544	 12	54.3	9.0	 16
545	 12	71.3	11.5	 16
546	 12	72.3	16.9	 16
547	 12	124.5	19.7	 16
548	 12	90.3	12.1	 16
549	 12	65.8	14.6	 16
550	 12	96.0	22.2	 20
551	 12	60.8	15.8	 16
552	 12	51.5	9.3	 16
553	 12	79.3	11.0	 16
554	 12	240.5	47.1	 16
555	 12	80.0	14.1	 16
556	 12	185.5	49.2	 16
557	 12	93.8	18.7	 16
558	 12	337.0	90.6	 16
559	 12	124.5	27.8	 16
560	 12	656.5	62.6	 16
561	 12	644.3	65.6	 16
562	 12	153.5	26.5	 16
563	 12	149.3	19.0	 16
564	 12	155.3	23.8	 16
565	 12	142.3	23.3	 16
566	 12	81.8	17.8	 16
567	 12	138.3	18.8	 16
568	 12	79.3	13.9	 16
569	 12	81.5	17.9	 16
570	 12	584.8	120.7	 16
571	 12	178.5	42.1	 16
572	 12	59.5	7.5	 16
573	 12	61.8	11.7	 16
574	 12	57.5	8.5	 16
575	 12	64.0	16.9	 16
576	 12	60.3	35.9	 16
577	 12	78.0	23.2	 16
578	 12	108.3	16.3	 16
579	 12	201.5	32.1	 16
580	 12	74.0	8.6	 16
581	 12	326.3	51.2	 16
582	 12	66.5	11.0	 16
583	 12	178.3	22.3	 16
584	 12	82.3	18.3	 16
585	 12	229.5	34.7	 16
586	 12	260.0	25.9	 16
587	 12	64.3	9.8	 16
588	 12	71.5	11.5	 16
589	 12	135.0	21.0	 16
590	 12	97.3	20.2	 16
591	 12	78.5	20.6	 16
592	 12	105.0	14.7	 16
593	 12	72.8	9.2	 16
594	 12	238.8	23.7	 16
595	 12	105.3	19.6	 16
596	 12	219.0	29.5	 16
597	 12	137.0	25.7	 16
598	 12	136.0	18.4	 16
599	 12	107.5	14.6	 16
600	 12	410.5	30.7	 16
601	 12	111.5	16.2	 16
602	 12	134.3	22.8	 16
603	 12	109.8	13.8	 16
604	 12	94.5	18.0	 16
605	 12	65.3	14.6	 16
606	 12	74.5	11.5	 16
607	 12	67.3	15.0	 16
608	 12	43.3	11.2	 16
609	 12	54.3	12.2	 16
610	 12	62.0	12.0	 16
611	 12	82.0	12.2	 16
612	 12	111.0	23.3	 16
613	 12	211.8	27.3	 16
614	 12	130.5	17.7	 16
615	 12	97.3	15.6	 16
616	 12	68.5	14.8	 16
617	 12	76.3	12.3	 16
618	 12	68.5	14.8	 16
619	 12	328.3	48.8	 16
620	 12	65.3	12.9	 16
621	 12	52.3	9.8	 16
622	 12	51.5	6.6	 16
623	 12	64.3	11.8	 16
624	 12	54.8	8.1	 16
625	 12	57.5	12.6	 16
626	 12	75.5	10.0	 16
627	 12	102.5	16.8	 16
628	 12	72.5	16.7	 16
629	 12	64.0	14.2	 16
630	 12	61.8	9.1	 16
631	 12	98.0	16.7	 16
632	 12	130.8	14.1	 16
633	 12	84.8	16.5	 16
634	 12	185.0	26.7	 16
635	 12	79.5	13.0	 16
636	 12	58.0	10.9	 16
637	 12	77.5	20.0	 16
638	 12	76.3	12.5	 16
639	 12	58.8	10.5	 16
640	 12	197.8	24.3	 16
641	 12	89.0	13.0	 16
642	 12	56.8	12.8	 16
643	 12	109.8	12.0	 16
644	 12	98.5	15.2	 16
645	 12	68.3	25.5	 16
646	 12	100.3	20.4	 16
647	 12	97.0	17.0	 16
648	 12	92.5	16.4	 16
649	 12	178.0	29.2	 16
650	 12	72.5	11.1	 16
651	 12	67.5	12.9	 16
652	 12	69.0	13.6	 16
653	 12	57.3	14.8	 16
654	 12	52.8	11.0	 16
655	 12	96.3	14.8	 16
656	 12	59.0	8.5	 16
657	 12	49.3	11.2	 16
658	 12	94.3	18.4	 16
659	 12	66.0	10.0	 16
660	 12	65.3	12.1	 16
661	 12	64.0	11.5	 16
662	 12	106.5	21.2	 16
663	 12	262.5	31.0	 16
664	 12	275.0	36.6	 16
665	 12	82.5	12.7	 16
666	 12	185.3	25.3	 16
667	 12	70.0	14.3	 16
668	 12	104.5	11.1	 16
669	 12	202.0	35.9	 20
670	 12	180.3	32.0	 16
671	 12	388.0	54.8	 16
672	 12	423.5	82.6	 16
673	 12	60.5	11.7	 16
674	 12	91.5	16.0	 16
675	 12	65.3	10.6	 16
676	 12	59.5	8.4	 16
677	 12	107.3	20.5	 16
678	 12	203.0	35.3	 16
679	 12	231.0	28.4	 16
680	 12	285.0	42.1	 16
681	 12	158.8	26.1	 16
682	 12	261.8	45.9	 16
683	 12	147.8	18.8	 16
684	 12	159.3	38.0	 16
685	 12	217.5	31.4	 16
686	 12	96.8	16.2	 16
687	 12	69.8	15.2	 16
688	 12	67.8	14.0	 16
689	 12	65.0	14.1	 16
690	 12	65.3	15.4	 16
691	 12	63.8	12.7	 16
692	 12	59.5	11.0	 16
693	 12	68.3	17.9	 16
694	 12	117.0	19.3	 16
695	 12	84.3	12.4	 16
696	 12	59.3	7.7	 16
697	 12	172.8	36.9	 16
698	 12	74.5	14.3	 16
699	 12	117.0	19.7	 16
700	 12	214.5	29.1	 16
701	 12	98.5	15.5	 16
702	 12	109.5	18.6	 16
703	 12	87.3	16.7	 16
704	 12	71.5	14.2	 16
705	 12	121.5	13.7	 16
706	 12	124.0	23.6	 16
707	 12	127.3	16.6	 16
708	 12	176.3	21.5	 16
709	 12	131.5	21.2	 16
710	 12	121.8	17.9	 16
711	 12	6926.8	787.0	 16
  0	 13	97.0	17.2	 16
  1	 13	198.5	26.6	 16
  2	 13	87.0	21.6	 16
  3	 13	75.5	19.0	 16
  4	 13	160.0	20.5	 16
  5	 13	107.5	19.5	 16
  6	 13	65.3	13.8	 16
  7	 13	160.5	32.1	 16
  8	 13	112.0	22.1	 16
  9	 13	190.0	30.1	 16
 10	 13	161.8	24.5	 16
 11	 13	57.8	11.3	 16
 12	 13	74.0	13.6	 16
 13	 13	67.0	9.7	 16
 14	 13	73.0	11.9	 16
 15	 13	167.3	29.3	 16
 16	 13	379.5	45.3	 16
 17	 13	720.3	86.5	 16
 18	 13	146.5	27.8	 16
 19	 13	113.8	19.7	 16
 20	 13	175.3	25.8	 16
 21	 13	317.0	45.1	 16
 22	 13	63.8	10.9	 16
 23	 13	72.3	16.0	 16
 24	 13	62.5	10.8	 16
 25	 13	203.3	36.9	 16
 26	 13	78.5	10.0	 16
 27	 13	1084.0	184.1	 16
 28	 13	219.3	34.8	 16
 29	 13	81.0	16.9	 16
 30	 13	60.3	9.0	 16
 31	 13	1415.5	283.2	 16
 32	 13	88.3	18.0	 16
 33	 13	355.3	69.1	 16
 34	 13	1135.0	237.5	 16
 35	 13	819.3	158.2	 16
 36	 13	112.3	23.1	 16
 37	 13	693.5	120.3	 16
 38	 13	74.0	14.6	 16
 39	 13	159.5	24.1	 16
 40	 13	141.5	21.8	 16
 41	 13	133.3	14.7	 16
 42	 13	139.5	26.8	 16
 43	 13	95.3	19.1	 16
 44	 13	72.5	10.1	 16
 45	 13	166.3	23.1	 16
 46	 13	909.5	109.6	 16
 47	 13	4694.8	642.1	 16
 48	 13	169.3	23.4	 16
 49	 13	77.3	12.3	 16
 50	 13	77.0	9.4	 16
 51	 13	2257.0	444.8	 16
 52	 13	105.3	16.2	 16
 53	 13	52.3	8.8	 16
 54	 13	88.0	19.2	 16
 55	 13	69.8	12.9	 16
 56	 13	58.0	13.2	 16
 57	 13	67.5	18.7	 16
 58	 13	78.5	19.8	 16
 59	 13	91.3	17.7	 16
 60	 13	87.5	11.4	 16
 61	 13	77.5	13.3	 16
 62	 13	108.0	12.0	 16
 63	 13	120.8	14.5	 16
 64	 13	2579.8	381.8	 16
 65	 13	424.5	60.8	 16
 66	 13	121.3	18.0	 16
 67	 13	161.0	22.0	 16
 68	 13	459.3	66.8	 16
 69	 13	120.3	17.0	 16
 70	 13	66.0	13.5	 16
 71	 13	262.5	33.4	 16
 72	 13	56.5	7.5	 16
 73	 13	65.5	13.1	 16
 74	 13	437.8	55.7	 16
 75	 13	60.8	11.0	 16
 76	 13	74.3	13.3	 16
 77	 13	2465.8	677.7	 20
 78	 13	260.5	80.1	 16
 79	 13	63.3	10.9	 16
 80	 13	385.3	104.9	 16
 81	 13	88.0	17.1	 16
 82	 13	306.5	82.8	 16
 83	 13	114.8	19.9	 16
 84	 13	52.0	10.3	 16
 85	 13	58.5	10.7	 16
 86	 13	156.5	20.9	 16
 87	 13	115.5	21.0	 16
 88	 13	484.8	32.4	 16
 89	 13	732.0	109.9	 16
 90	 13	179.0	24.9	 16
 91	 13	595.3	112.9	 16
 92	 13	71.3	12.0	 16
 93	 13	78.3	13.9	 16
 94	 13	108.3	18.6	 16
 95	 13	65.3	11.5	 16
 96	 13	103.5	19.0	 16
 97	 13	58.3	11.3	 16
 98	 13	72.0	13.4	 16
 99	 13	70.3	13.4	 16
100	 13	121.0	13.7	 16
101	 13	922.3	161.7	 16
102	 13	68.5	13.2	 16
103	 13	98.3	17.2	 16
104	 13	61.0	9.6	 16
105	 13	115.8	20.5	 12
106	 13	406.0	71.4	 16
107	 13	63.5	12.2	 16
108	 13	90.8	12.0	 16
109	 13	63.3	12.9	 16
110	 13	100.8	22.9	 16
111	 13	276.0	46.1	 16
112	 13	675.8	89.7	 16
113	 13	89.3	14.2	 16
114	 13	73.3	15.7	 16
115	 13	177.3	29.1	 16
116	 13	105.8	16.9	 16
117	 13	209.3	32.7	 16
118	 13	88.8	20.0	 16
119	 13	95.8	13.3	 16
120	 13	2103.5	334.5	 16
121	 13	143.5	14.4	 16
122	 13	67.3	12.6	 16
123	 13	103.0	24.2	 16
124	 13	213.8	36.4	 16
125	 13	80.3	13.2	 16
126	 13	1205.8	204.6	 16
127	 13	92.0	12.1	 16
128	 13	136.0	24.8	 16
129	 13	521.3	91.3	 16
130	 13	74.0	11.6	 16
131	 13	365.8	81.2	 16
132	 13	331.0	82.4	 16
133	 13	336.3	68.5	 16
134	 13	2020.0	457.0	 16
135	 13	126.8	23.8	 16
136	 13	73.8	15.8	 16
137	 13	230.8	53.2	 16
138	 13	242.3	50.6	 16
139	 13	138.5	22.8	 16
140	 13	126.0	32.5	 16
141	 13	63.5	9.7	 16
142	 13	553.3	129.7	 16
143	 13	90.5	16.6	 16
144	 13	168.0	28.3	 16
145	 13	574.8	108.5	 16
146	 13	1722.3	390.8	 16
147	 13	68.5	14.5	 16
148	 13	509.8	84.6	 16
149	 13	87.3	11.7	 16
150	 13	130.3	22.2	 16
151	 13	66.3	12.9	 16
152	 13	96.5	18.2	 16
153	 13	5562.8	886.1	 16
154	 13	391.5	59.3	 16
155	 13	78.3	13.4	 16
156	 13	85.8	21.0	 16
157	 13	82.5	11.2	 16
158	 13	105.0	14.3	 16
159	 13	186.8	30.0	 16
160	 13	57.0	14.3	 16
161	 13	113.3	16.8	 16
162	 13	60.0	6.3	 16
163	 13	60.0	14.7	 16
164	 13	109.5	16.4	 16
165	 13	321.5	43.3	 16
166	 13	71.0	12.7	 16
167	 13	174.3	23.1	 16
168	 13	86.8	13.9	 16
169	 13	87.0	14.0	 16
170	 13	81.5	15.3	 16
171	 13	61.3	12.8	 16
172	 13	143.0	24.7	 16
173	 13	52.8	11.3	 16
174	 13	127.5	17.5	 16
175	 13	81.3	10.9	 16
176	 13	89.5	22.4	 16
177	 13	80.5	14.7	 16
178	 13	239.3	30.8	 16
179	 13	78.0	13.7	 16
180	 13	327.5	51.1	 16
181	 13	147.3	24.1	 16
182	 13	212.0	28.2	 16
183	 13	79.3	11.9	 16
184	 13	133.5	34.2	 16
185	 13	60.8	10.9	 16
186	 13	1655.8	312.1	 16
187	 13	570.5	86.8	 16
188	 13	153.8	20.6	 16
189	 13	100.0	19.2	 16
190	 13	252.0	33.8	 16
191	 13	139.8	22.4	 16
192	 13	183.5	28.0	 16
193	 13	134.0	24.7	 16
194	 13	74.5	17.4	 16
195	 13	244.0	46.1	 20
196	 13	114.8	21.4	 16
197	 13	80.0	16.4	 16
198	 13	318.5	64.8	 16
199	 13	83.3	14.6	 16
200	 13	579.3	157.9	 16
201	 13	65.8	14.8	 16
202	 13	261.8	58.6	 16
203	 13	165.3	34.3	 16
204	 13	77.0	10.7	 16
205	 13	148.0	23.6	 16
206	 13	284.0	32.9	 16
207	 13	218.3	43.4	 16
208	 13	154.0	26.6	 16
209	 13	68.5	11.8	 16
210	 13	83.5	12.3	 16
211	 13	215.3	36.7	 16
212	 13	2163.0	418.8	 16
213	 13	179.5	28.3	 16
214	 13	66.3	14.3	 16
215	 13	105.0	17.2	 16
216	 13	67.8	11.2	 16
217	 13	56.0	12.1	 16
218	 13	60.5	10.1	 16
219	 13	60.5	9.6	 16
220	 13	183.3	21.1	 16
221	 13	180.3	21.5	 16
222	 13	191.0	29.6	 16
223	 13	263.3	36.2	 16
224	 13	85.3	12.3	 16
225	 13	68.0	9.6	 16
226	 13	69.5	9.6	 16
227	 13	96.3	17.2	 16
228	 13	123.0	18.8	 16
229	 13	78.0	12.7	 16
230	 13	66.0	9.1	 16
231	 13	269.8	32.5	 16
232	 13	243.3	33.2	 16
233	 13	237.5	35.0	 16
234	 13	68.8	11.0	 16
235	 13	965.3	106.9	 16
236	 13	241.8	37.4	 16
237	 13	1645.8	133.2	 16
238	 13	1658.5	109.3	 16
239	 13	785.8	118.6	 16
240	 13	261.0	41.6	 16
241	 13	3548.8	673.2	 16
242	 13	3460.0	586.6	 16
243	 13	200.3	30.3	 16
244	 13	217.8	31.5	 16
245	 13	70.3	10.4	 16
246	 13	143.8	23.0	 16
247	 13	134.8	20.0	 16
248	 13	116.5	12.8	 16
249	 13	71.8	10.7	 16
250	 13	54.3	11.2	 16
251	 13	85.8	15.4	 16
252	 13	48.8	7.3	 16
253	 13	51.0	9.3	 16
254	 13	69.3	15.4	 16
255	 13	89.0	16.2	 16
256	 13	784.5	122.0	 16
257	 13	74.0	13.4	 16
258	 13	91.0	13.0	 16
259	 13	71.3	11.0	 16
260	 13	50.5	8.5	 16
261	 13	203.5	32.4	 16
262	 13	104.3	19.6	 16
263	 13	413.3	60.5	 16
264	 13	60.3	14.1	 16
265	 13	104.8	42.1	 16
266	 13	302.0	70.0	 16
267	 13	228.0	28.5	 16
268	 13	69.3	11.7	 16
269	 13	361.8	53.5	 16
270	 13	326.8	56.4	 16
271	 13	90.8	18.9	 16
272	 13	97.3	24.4	 16
273	 13	75.8	10.2	 16
274	 13	70.0	10.0	 16
275	 13	76.5	14.7	 16
276	 13	2099.5	254.1	 16
277	 13	106.3	17.3	 16
278	 13	104.8	13.7	 16
279	 13	91.3	18.2	 16
280	 13	64.0	12.2	 16
281	 13	53.3	7.8	 16
282	 13	82.0	15.3	 16
283	 13	127.3	19.1	 16
284	 13	58.0	8.9	 16
285	 13	74.5	16.8	 16
286	 13	841.0	63.7	 16
287	 13	381.5	53.7	 16
288	 13	91.3	14.4	 16
289	 13	82.0	10.3	 16
290	 13	313.5	43.1	 16
291	 13	85.0	12.7	 16
292	 13	204.0	29.4	 16
293	 13	87.8	16.4	 16
294	 13	197.5	27.7	 16
295	 13	218.3	37.4	 16
296	 13	110.0	15.8	 16
297	 13	185.8	28.6	 16
298	 13	387.5	36.6	 16
299	 13	209.8	24.9	 16
300	 13	195.3	29.2	 16
301	 13	159.3	23.9	 16
302	 13	384.5	51.9	 16
303	 13	314.8	49.0	 16
304	 13	579.8	59.9	 16
305	 13	249.8	35.7	 16
306	 13	542.8	84.1	 16
307	 13	81.8	14.9	 16
308	 13	77.8	14.4	 16
309	 13	318.0	42.3	 16
310	 13	347.5	56.2	 16
311	 13	118.3	23.5	 16
312	 13	102.0	17.8	 16
313	 13	87.5	14.2	 16
314	 13	94.8	21.7	 20
315	 13	59.0	10.1	 16
316	 13	105.8	19.3	 16
317	 13	115.3	20.2	 16
318	 13	66.0	17.0	 16
319	 13	66.5	10.7	 16
320	 13	164.3	76.9	 16
321	 13	130.0	30.6	 16
322	 13	184.0	79.5	 16
323	 13	1787.0	585.2	 16
324	 13	136.8	43.8	 16
325	 13	256.8	50.9	 16
326	 13	279.5	79.1	 16
327	 13	120.5	14.9	 16
328	 13	75.5	13.4	 16
329	 13	579.0	67.8	 16
330	 13	564.3	159.0	 16
331	 13	640.5	176.6	 16
332	 13	277.3	73.2	 16
333	 13	203.0	42.7	 16
334	 13	64.0	16.9	 16
335	 13	55.8	12.1	 16
336	 13	61.5	10.5	 16
337	 13	63.0	13.0	 16
338	 13	212.8	40.1	 16
339	 13	168.0	24.5	 16
340	 13	310.8	57.1	 16
341	 13	2513.8	547.8	 16
342	 13	107.5	24.1	 16
343	 13	62.3	14.6	 16
344	 13	63.3	9.1	 16
345	 13	210.0	41.4	 16
346	 13	494.8	89.2	 16
347	 13	63.0	11.4	 16
348	 13	165.3	27.0	 16
349	 13	806.8	180.6	 16
350	 13	2209.5	442.0	 16
351	 13	227.5	33.7	 16
352	 13	165.0	31.5	 16
353	 13	2017.0	390.3	 16
354	 13	741.0	149.9	 16
355	 13	253.5	30.5	 16
356	 13	202.3	38.3	 16
357	 13	149.3	17.6	 16
358	 13	78.8	13.7	 16
359	 13	59.0	7.7	 16
360	 13	70.8	13.1	 16
361	 13	302.5	36.7	 16
362	 13	106.3	14.5	 16
363	 13	86.3	12.9	 16
364	 13	71.3	11.0	 16
365	 13	63.3	15.0	 16
366	 13	74.0	11.5	 16
367	 13	414.3	44.7	 16
368	 13	55.0	9.4	 16
369	 13	89.8	14.6	 16
370	 13	322.5	33.2	 16
371	 13	542.5	83.0	 16
372	 13	281.5	39.1	 16
373	 13	120.0	23.1	 16
374	 13	65.8	11.4	 16
375	 13	131.0	15.3	 16
376	 13	102.0	14.6	 16
377	 13	204.5	22.4	 16
378	 13	82.3	15.4	 16
379	 13	262.3	28.3	 16
380	 13	240.8	31.3	 16
381	 13	53.0	13.8	 16
382	 13	65.0	13.1	 16
383	 13	109.5	25.3	 16
384	 13	400.3	41.1	 16
385	 13	73.8	11.9	 16
386	 13	98.8	14.9	 16
387	 13	73.3	11.1	 16
388	 13	117.3	26.5	 16
389	 13	74.3	11.9	 16
390	 13	176.5	21.4	 16
391	 13	170.8	25.6	 16
392	 13	59.5	10.7	 16
393	 13	49.0	10.7	 16
394	 13	316.0	40.8	 16
395	 13	71.0	9.2	 16
396	 13	266.3	32.8	 16
397	 13	192.5	35.1	 16
398	 13	105.3	19.2	 16
399	 13	74.3	11.4	 16
400	 13	728.8	68.2	 16
401	 13	797.8	99.2	 16
402	 13	102.3	17.1	 16
403	 13	70.3	14.3	 16
404	 13	87.5	17.3	 16
405	 13	56.3	10.2	 16
406	 13	227.8	17.1	 16
407	 13	162.3	27.3	 16
408	 13	99.8	13.0	 16
409	 13	89.3	11.0	 16
410	 13	445.8	54.2	 16
411	 13	111.3	15.8	 16
412	 13	72.8	12.6	 16
413	 13	494.5	63.0	 16
414	 13	621.0	68.3	 16
415	 13	207.5	26.5	 16
416	 13	195.0	35.4	 16
417	 13	189.8	21.7	 16
418	 13	194.5	27.8	 16
419	 13	122.3	14.4	 16
420	 13	82.0	12.4	 16
421	 13	65.5	10.6	 16
422	 13	252.0	30.9	 16
423	 13	80.0	13.5	 16
424	 13	126.3	20.2	 16
425	 13	95.8	15.1	 16
426	 13	59.5	9.4	 16
427	 13	676.5	88.2	 16
428	 13	114.5	19.7	 16
429	 13	273.5	35.9	 16
430	 13	156.3	27.4	 16
431	 13	385.8	58.1	 16
432	 13	1142.3	136.7	 16
433	 13	1524.3	289.7	 20
434	 13	1297.3	336.4	 16
435	 13	149.3	35.3	 16
436	 13	78.8	9.4	 16
437	 13	363.5	88.7	 16
438	 13	133.0	28.5	 16
439	 13	2412.8	764.7	 16
440	 13	99.0	26.1	 16
441	 13	226.3	51.6	 16
442	 13	138.5	42.7	 16
443	 13	71.8	11.3	 16
444	 13	127.8	18.7	 16
445	 13	60.3	10.4	 16
446	 13	110.0	18.7	 16
447	 13	67.8	11.9	 16
448	 13	95.8	19.5	 16
449	 13	56.3	12.1	 16
450	 13	54.0	7.4	 16
451	 13	57.3	9.6	 16
452	 13	54.8	9.2	 16
453	 13	132.8	29.9	 16
454	 13	80.0	15.9	 16
455	 13	656.0	168.0	 16
456	 13	56.3	8.9	 16
457	 13	151.8	33.4	 16
458	 13	107.5	17.1	 16
459	 13	84.3	17.3	 16
460	 13	96.5	18.6	 16
461	 13	177.8	34.8	 16
462	 13	1137.8	238.2	 16
463	 13	226.5	49.0	 16
464	 13	67.5	11.9	 16
465	 13	277.3	37.0	 16
466	 13	224.5	43.4	 16
467	 13	282.0	46.5	 16
468	 13	50.0	8.4	 16
469	 13	240.0	42.5	 16
470	 13	107.3	17.3	 16
471	 13	378.0	57.3	 16
472	 13	69.0	13.7	 16
473	 13	465.3	77.3	 16
474	 13	178.0	25.9	 16
475	 13	69.5	10.3	 16
476	 13	93.5	11.5	 16
477	 13	136.5	26.5	 16
478	 13	51.3	9.3	 16
479	 13	80.8	17.1	 16
480	 13	11399.3	1799.8	 16
481	 13	791.3	174.2	 16
482	 13	294.5	64.3	 16
483	 13	71.5	12.5	 16
484	 13	70.3	10.9	 16
485	 13	470.3	30.5	 16
486	 13	517.3	51.1	 16
487	 13	540.0	102.9	 16
488	 13	195.3	39.3	 16
489	 13	80.8	13.9	 16
490	 13	82.0	17.2	 16
491	 13	57.0	8.4	 16
492	 13	59.3	9.6	 16
493	 13	64.3	14.5	 16
494	 13	72.8	20.4	 16
495	 13	113.8	25.6	 16
496	 13	80.5	19.5	 16
497	 13	252.3	55.5	 16
498	 13	71.0	12.7	 16
499	 13	163.0	29.5	 16
500	 13	256.5	41.2	 16
501	 13	104.0	14.5	 16
502	 13	169.5	35.6	 16
503	 13	61.0	8.6	 16
504	 13	136.0	17.4	 16
505	 13	71.8	12.6	 16
506	 13	268.8	45.4	 16
507	 13	166.3	24.5	 16
508	 13	1765.0	342.9	 16
509	 13	651.0	116.7	 16
510	 13	124.3	19.9	 16
511	 13	197.5	34.9	 16
512	 13	85.8	14.6	 16
513	 13	142.5	28.3	 16
514	 13	232.0	39.5	 16
515	 13	486.3	69.9	 16
516	 13	163.5	21.0	 16
517	 13	145.5	24.2	 16
518	 13	77.0	16.9	 16
519	 13	153.3	29.1	 16
520	 13	84.0	18.1	 16
521	 13	94.5	13.1	 16
522	 13	131.3	16.9	 16
523	 13	158.5	27.4	 16
524	 13	166.0	23.1	 16
525	 13	57.5	7.1	 16
526	 13	83.8	10.6	 16
527	 13	179.5	31.6	 16
528	 13	258.8	34.5	 16
529	 13	219.0	17.5	 16
530	 13	217.8	30.9	 16
531	 13	79.8	11.8	 16
532	 13	172.5	25.3	 16
533	 13	78.0	12.4	 16
534	 13	76.0	13.3	 16
535	 13	686.5	89.6	 16
536	 13	75.3	12.5	 16
537	 13	114.0	19.7	 16
538	 13	168.0	22.3	 16
539	 13	122.3	23.2	 16
540	 13	110.0	15.2	 16
541	 13	190.5	24.5	 16
542	 13	48.3	7.9	 16
543	 13	167.5	28.3	 16
544	 13	59.3	11.1	 16
545	 13	219.3	29.0	 16
546	 13	449.0	42.9	 16
547	 13	1187.3	146.0	 16
548	 13	543.3	49.9	 16
549	 13	248.0	33.5	 16
550	 13	65.5	12.6	 16
551	 13	118.8	17.6	 16
552	 13	72.8	14.0	 20
553	 13	3991.3	1018.3	 16
554	 13	46.5	11.1	 16
555	 13	57.8	9.7	 16
556	 13	1531.0	399.6	 16
557	 13	64.3	15.3	 16
558	 13	69.3	11.0	 16
559	 13	105.5	22.7	 16
560	 13	91.8	17.8	 16
561	 13	86.0	15.4	 16
562	 13	411.5	82.9	 16
563	 13	1345.5	310.6	 16
564	 13	114.3	19.3	 16
565	 13	89.5	16.8	 16
566	 13	315.0	45.3	 16
567	 13	468.5	38.3	 16
568	 13	181.0	20.3	 16
569	 13	142.0	11.3	 16
570	 13	94.8	10.6	 16
571	 13	53.0	9.0	 16
572	 13	182.0	24.7	 16
573	 13	313.8	56.4	 16
574	 13	143.5	20.8	 16
575	 13	173.0	26.3	 16
576	 13	180.3	28.7	 16
577	 13	121.3	22.9	 16
578	 13	358.3	41.8	 16
579	 13	797.5	71.8	 16
580	 13	202.3	20.9	 16
581	 13	170.8	19.8	 16
582	 13	148.0	22.9	 16
583	 13	163.5	24.1	 16
584	 13	616.8	43.1	 16
585	 13	113.5	15.2	 16
586	 13	120.5	13.3	 16
587	 13	293.3	40.3	 16
588	 13	51.5	7.3	 16
589	 13	87.8	14.5	 16
590	 13	83.8	21.2	 16
591	 13	485.3	43.8	 16
592	 13	1140.3	95.0	 16
593	 13	124.3	18.1	 16
594	 13	333.8	42.1	 16
595	 13	673.0	72.2	 16
596	 13	79.3	13.8	 16
597	 13	2683.3	357.5	 16
598	 13	367.8	35.8	 16
599	 13	176.5	32.9	 16
600	 13	113.8	18.8	 16
601	 13	120.3	13.0	 16
602	 13	228.0	27.9	 16
603	 13	77.0	13.0	 16
604	 13	122.3	26.0	 16
605	 13	211.5	44.3	 16
606	 13	244.3	34.2	 16
607	 13	110.3	20.2	 16
608	 13	156.0	34.3	 16
609	 13	130.5	21.2	 16
610	 13	56.3	10.6	 16
611	 13	53.3	7.2	 16
612	 13	75.3	10.8	 16
613	 13	126.3	19.6	 16
614	 13	195.3	23.4	 16
615	 13	249.8	34.6	 16
616	 13	330.3	48.3	 16
617	 13	127.3	14.9	 16
618	 13	261.0	32.3	 16
619	 13	276.5	25.0	 16
620	 13	76.3	13.3	 16
621	 13	60.5	11.7	 16
622	 13	135.8	17.9	 16
623	 13	363.5	56.7	 16
624	 13	143.5	23.8	 16
625	 13	102.3	15.9	 16
626	 13	66.5	11.9	 16
627	 13	71.0	13.2	 16
628	 13	78.3	16.4	 16
629	 13	66.5	11.6	 16
630	 13	2121.0	116.3	 16
631	 13	2751.3	164.6	 16
632	 13	113.5	17.4	 16
633	 13	197.8	30.8	 16
634	 13	897.0	46.0	 16
635	 13	583.3	64.2	 16
636	 13	1171.3	94.7	 16
637	 13	55.3	10.3	 16
638	 13	391.0	57.1	 16
639	 13	108.3	14.3	 16
640	 13	230.0	31.6	 16
641	 13	183.8	30.1	 16
642	 13	127.5	17.1	 16
643	 13	76.5	15.5	 16
644	 13	81.8	16.4	 16
645	 13	221.8	27.6	 16
646	 13	149.3	23.5	 16
647	 13	371.5	55.9	 16
648	 13	78.5	13.4	 16
649	 13	91.5	18.4	 16
650	 13	138.3	24.6	 16
651	 13	65.5	7.3	 16
652	 13	250.8	29.8	 16
653	 13	71.8	13.6	 16
654	 13	67.0	13.9	 16
655	 13	53.3	10.9	 16
656	 13	53.0	8.7	 16
657	 13	61.3	11.4	 16
658	 13	443.3	41.4	 16
659	 13	1035.8	126.2	 16
660	 13	2075.8	136.1	 16
661	 13	236.0	25.9	 16
662	 13	157.3	16.9	 16
663	 13	408.8	52.5	 16
664	 13	2264.3	221.2	 16
665	 13	147.3	24.5	 16
666	 13	2260.3	162.4	 16
667	 13	76.0	11.6	 16
668	 13	889.5	96.3	 16
669	 13	61.8	12.2	 16
670	 13	140.5	32.1	 20
671	 13	67.3	12.5	 16
672	 13	95.3	16.9	 16
673	 13	106.3	19.0	 16
674	 13	64.0	14.3	 16
675	 13	54.3	10.5	 16
676	 13	122.0	18.3	 16
677	 13	255.8	49.3	 16
678	 13	75.3	14.9	 16
679	 13	107.3	22.2	 16
680	 13	1420.8	249.3	 16
681	 13	129.5	22.5	 16
682	 13	148.3	18.0	 16
683	 13	117.5	18.2	 16
684	 13	380.3	80.5	 16
685	 13	223.3	42.5	 16
686	 13	78.8	12.8	 16
687	 13	67.0	12.3	 16
688	 13	95.5	16.6	 16
689	 13	1243.0	178.1	 16
690	 13	106.5	20.8	 16
691	 13	356.3	45.3	 16
692	 13	298.0	31.5	 16
693	 13	442.5	61.7	 16
694	 13	81.0	12.8	 16
695	 13	191.5	34.7	 16
696	 13	430.3	72.3	 16
697	 13	137.3	22.4	 16
698	 13	3575.5	356.4	 16
699	 13	262.3	32.8	 16
700	 13	129.8	28.3	 16
701	 13	247.0	25.0	 16
702	 13	1528.3	152.6	 16
703	 13	517.0	70.1	 16
704	 13	142.5	16.0	 16
705	 13	124.5	17.9	 16
706	 13	117.5	16.6	 16
707	 13	1037.3	141.3	 16
708	 13	210.3	20.4	 16
709	 13	241.5	33.5	 16
710	 13	1320.8	127.4	 16
711	 13	107.0	17.7	 16
  0	 14	9146.0	1042.8	 16
  1	 14	210.0	23.8	 16
  2	 14	88.3	17.3	 16
  3	 14	66.8	11.9	 16
  4	 14	114.5	13.1	 16
  5	 14	91.0	21.3	 16
  6	 14	60.0	11.3	 16
  7	 14	68.3	10.8	 16
  8	 14	315.8	29.8	 16
  9	 14	117.3	17.8	 16
 10	 14	66.5	11.4	 16
 11	 14	75.0	15.0	 16
 12	 14	54.0	10.8	 16
 13	 14	55.8	10.4	 16
 14	 14	64.5	20.1	 16
 15	 14	265.8	36.2	 16
 16	 14	291.5	27.3	 16
 17	 14	116.8	24.7	 16
 18	 14	81.5	16.4	 16
 19	 14	72.8	17.1	 16
 20	 14	96.3	15.9	 16
 21	 14	89.3	14.0	 16
 22	 14	65.0	8.9	 16
 23	 14	60.5	13.7	 16
 24	 14	67.0	16.6	 16
 25	 14	61.5	9.2	 16
 26	 14	67.5	12.8	 16
 27	 14	114.0	15.9	 16
 28	 14	187.5	226.1	 16
 29	 14	67.3	10.6	 16
 30	 14	49.0	10.4	 16
 31	 14	172.3	38.9	 16
 32	 14	72.3	11.1	 16
 33	 14	65.5	8.6	 16
 34	 14	80.8	15.8	 16
 35	 14	89.3	15.2	 16
 36	 14	84.0	14.8	 16
 37	 14	141.3	33.8	 16
 38	 14	70.3	12.1	 16
 39	 14	118.8	26.1	 16
 40	 14	74.3	13.7	 16
 41	 14	229.3	32.6	 16
 42	 14	73.3	12.3	 16
 43	 14	73.5	12.0	 16
 44	 14	88.0	16.0	 16
 45	 14	188.3	32.1	 16
 46	 14	170.3	18.5	 16
 47	 14	1972.3	247.2	 16
 48	 14	204.0	24.9	 16
 49	 14	71.0	16.1	 16
 50	 14	64.0	13.6	 16
 51	 14	715.8	142.5	 16
 52	 14	81.0	18.9	 16
 53	 14	56.5	11.0	 16
 54	 14	61.3	12.4	 16
 55	 14	61.5	11.9	 16
 56	 14	64.0	10.6	 16
 57	 14	59.3	9.4	 16
 58	 14	55.3	11.8	 16
 59	 14	66.0	13.5	 16
 60	 14	75.3	13.9	 16
 61	 14	65.0	15.9	 16
 62	 14	153.5	14.3	 16
 63	 14	165.3	27.2	 16
 64	 14	303.3	67.1	 16
 65	 14	62.8	10.7	 16
 66	 14	91.5	15.5	 16
 67	 14	93.5	16.8	 16
 68	 14	92.8	20.0	 16
 69	 14	56.3	8.7	 16
 70	 14	50.3	6.6	 16
 71	 14	82.0	15.7	 16
 72	 14	55.3	8.5	 16
 73	 14	55.3	9.3	 16
 74	 14	64.3	10.2	 16
 75	 14	51.3	8.4	 16
 76	 14	62.5	13.6	 16
 77	 14	394.3	68.1	 16
 78	 14	63.5	13.6	 20
 79	 14	61.8	12.0	 16
 80	 14	117.5	23.6	 16
 81	 14	73.3	13.5	 16
 82	 14	82.3	15.9	 16
 83	 14	64.3	12.4	 16
 84	 14	53.3	9.0	 16
 85	 14	58.5	13.1	 16
 86	 14	125.3	20.1	 16
 87	 14	106.5	35.4	 16
 88	 14	364.8	34.3	 16
 89	 14	688.8	137.1	 16
 90	 14	95.3	16.7	 16
 91	 14	350.5	67.8	 16
 92	 14	71.5	9.7	 16
 93	 14	94.5	19.9	 16
 94	 14	201.8	29.9	 16
 95	 14	83.0	11.9	 16
 96	 14	65.3	12.3	 16
 97	 14	63.3	9.2	 16
 98	 14	54.0	9.2	 16
 99	 14	59.5	8.9	 16
100	 14	69.3	14.1	 16
101	 14	256.8	42.5	 16
102	 14	65.5	10.4	 16
103	 14	82.8	15.2	 16
104	 14	76.5	14.1	 16
105	 14	53.8	9.2	 16
106	 14	92.3	16.2	 16
107	 14	60.3	11.5	 16
108	 14	52.3	9.1	 16
109	 14	55.0	10.1	 16
110	 14	69.3	13.2	 16
111	 14	91.8	16.7	 16
112	 14	193.8	41.0	 16
113	 14	86.5	17.8	 16
114	 14	69.0	8.9	 16
115	 14	71.0	9.8	 16
116	 14	91.8	16.0	 16
117	 14	78.3	15.1	 16
118	 14	73.5	8.9	 16
119	 14	100.5	18.9	 16
120	 14	524.5	97.4	 16
121	 14	87.0	14.0	 16
122	 14	67.0	14.7	 16
123	 14	73.5	18.8	 16
124	 14	87.5	11.3	 16
125	 14	108.0	16.0	 16
126	 14	164.3	19.5	 16
127	 14	78.8	11.0	 16
128	 14	70.3	13.7	 16
129	 14	203.5	30.3	 16
130	 14	83.5	16.1	 16
131	 14	79.3	14.0	 16
132	 14	69.3	12.6	 16
133	 14	95.8	19.5	 16
134	 14	386.8	86.2	 16
135	 14	96.3	17.3	 16
136	 14	63.0	8.8	 16
137	 14	51.3	8.6	 16
138	 14	413.0	73.3	 16
139	 14	82.5	14.6	 16
140	 14	62.5	14.6	 16
141	 14	54.3	10.7	 16
142	 14	63.5	20.5	 16
143	 14	65.3	12.8	 16
144	 14	69.8	12.6	 16
145	 14	241.8	22.5	 16
146	 14	607.0	146.2	 16
147	 14	56.3	8.5	 16
148	 14	171.3	29.9	 16
149	 14	85.5	16.4	 16
150	 14	94.5	13.4	 16
151	 14	58.0	7.7	 16
152	 14	57.8	12.4	 16
153	 14	1849.8	366.2	 16
154	 14	102.0	24.8	 16
155	 14	64.5	11.3	 16
156	 14	89.5	14.8	 16
157	 14	104.8	21.1	 16
158	 14	190.5	30.9	 16
159	 14	117.3	15.9	 16
160	 14	56.3	8.0	 16
161	 14	75.0	12.4	 16
162	 14	64.0	12.8	 16
163	 14	59.3	8.6	 16
164	 14	87.3	15.8	 16
165	 14	72.0	11.1	 16
166	 14	64.8	10.1	 16
167	 14	78.3	14.8	 16
168	 14	78.3	14.2	 16
169	 14	59.5	12.2	 16
170	 14	56.5	8.9	 16
171	 14	62.3	10.9	 16
172	 14	79.3	13.1	 16
173	 14	58.5	10.5	 16
174	 14	67.3	14.6	 16
175	 14	75.5	13.3	 16
176	 14	74.0	13.0	 16
177	 14	83.0	16.8	 16
178	 14	93.3	15.7	 16
179	 14	63.0	15.5	 16
180	 14	183.5	29.4	 16
181	 14	123.5	15.8	 16
182	 14	257.5	24.4	 16
183	 14	52.5	8.4	 16
184	 14	71.5	11.8	 16
185	 14	63.5	11.2	 16
186	 14	334.5	33.2	 16
187	 14	97.3	16.9	 16
188	 14	113.5	18.3	 16
189	 14	113.3	19.7	 16
190	 14	103.0	19.5	 16
191	 14	104.3	15.9	 16
192	 14	72.0	15.1	 16
193	 14	77.5	16.3	 16
194	 14	83.8	11.6	 16
195	 14	106.5	18.9	 16
196	 14	150.8	22.0	 16
197	 14	70.5	10.1	 20
198	 14	82.0	14.6	 16
199	 14	95.0	15.1	 16
200	 14	156.3	27.7	 16
201	 14	62.8	18.6	 16
202	 14	72.0	12.8	 16
203	 14	65.5	9.0	 16
204	 14	57.3	7.1	 16
205	 14	88.8	19.6	 16
206	 14	113.5	16.6	 16
207	 14	85.5	16.7	 16
208	 14	73.0	11.4	 16
209	 14	64.3	10.5	 16
210	 14	84.0	17.0	 16
211	 14	72.0	12.1	 16
212	 14	578.5	129.1	 16
213	 14	70.3	14.8	 16
214	 14	55.3	11.9	 16
215	 14	63.3	11.4	 16
216	 14	61.5	10.1	 16
217	 14	60.8	13.1	 16
218	 14	68.0	17.1	 16
219	 14	61.0	13.5	 16
220	 14	111.3	21.1	 16
221	 14	110.3	21.1	 16
222	 14	134.3	32.9	 16
223	 14	256.3	37.6	 16
224	 14	76.0	17.0	 16
225	 14	73.0	12.9	 16
226	 14	84.3	10.6	 16
227	 14	77.8	13.9	 16
228	 14	106.0	10.7	 16
229	 14	74.0	13.2	 16
230	 14	64.3	9.8	 16
231	 14	145.8	24.7	 16
232	 14	166.8	34.4	 16
233	 14	253.8	32.3	 16
234	 14	117.5	13.0	 16
235	 14	526.5	52.0	 16
236	 14	210.8	32.5	 16
237	 14	4076.3	365.9	 16
238	 14	4072.0	689.5	 16
239	 14	539.0	74.8	 16
240	 14	108.3	25.9	 16
241	 14	686.3	132.0	 16
242	 14	748.8	163.0	 16
243	 14	81.8	12.0	 16
244	 14	62.8	13.7	 16
245	 14	59.5	10.0	 16
246	 14	82.0	13.9	 16
247	 14	65.0	11.2	 16
248	 14	62.0	11.5	 16
249	 14	54.0	15.6	 16
250	 14	56.8	13.5	 16
251	 14	57.3	11.5	 16
252	 14	52.3	15.8	 16
253	 14	55.5	12.0	 16
254	 14	72.3	12.3	 16
255	 14	68.8	13.2	 16
256	 14	184.0	28.6	 16
257	 14	83.3	9.8	 16
258	 14	75.0	14.5	 16
259	 14	63.5	11.6	 16
260	 14	54.0	10.0	 16
261	 14	66.0	13.4	 16
262	 14	65.3	11.7	 16
263	 14	155.8	20.5	 16
264	 14	65.0	14.4	 16
265	 14	89.5	12.3	 16
266	 14	80.0	16.7	 16
267	 14	300.0	35.4	 16
268	 14	77.3	15.1	 16
269	 14	224.0	22.2	 16
270	 14	120.8	20.8	 16
271	 14	60.8	16.1	 16
272	 14	86.0	14.3	 16
273	 14	80.0	17.6	 16
274	 14	64.3	16.1	 16
275	 14	62.3	11.7	 16
276	 14	133.5	24.9	 16
277	 14	77.3	17.6	 16
278	 14	61.0	8.9	 16
279	 14	57.3	10.0	 16
280	 14	55.0	10.2	 16
281	 14	54.3	7.1	 16
282	 14	99.0	14.8	 16
283	 14	142.3	19.1	 16
284	 14	54.0	11.3	 16
285	 14	74.0	10.7	 16
286	 14	307.0	34.4	 16
287	 14	73.3	13.4	 16
288	 14	67.0	16.5	 16
289	 14	85.8	13.9	 16
290	 14	56.0	9.5	 16
291	 14	56.0	5.2	 16
292	 14	87.5	14.3	 16
293	 14	66.3	13.3	 16
294	 14	108.5	18.4	 16
295	 14	137.8	18.2	 16
296	 14	151.5	28.0	 16
297	 14	71.3	11.3	 16
298	 14	85.5	23.0	 16
299	 14	122.8	18.6	 16
300	 14	97.0	16.4	 16
301	 14	134.3	19.5	 16
302	 14	71.0	13.2	 16
303	 14	89.5	16.9	 16
304	 14	164.0	21.2	 16
305	 14	65.5	10.6	 16
306	 14	112.3	19.3	 16
307	 14	100.3	15.5	 16
308	 14	62.5	11.9	 16
309	 14	155.8	24.2	 16
310	 14	154.5	20.7	 16
311	 14	105.0	16.1	 16
312	 14	64.3	8.8	 16
313	 14	55.8	9.7	 16
314	 14	70.3	11.6	 16
315	 14	62.3	12.9	 16
316	 14	87.3	12.9	 20
317	 14	81.0	17.4	 16
318	 14	63.0	11.1	 16
319	 14	69.3	11.5	 16
320	 14	122.3	37.2	 16
321	 14	93.0	8.2	 16
322	 14	113.8	24.4	 16
323	 14	243.8	59.6	 16
324	 14	155.8	56.6	 16
325	 14	546.5	97.6	 16
326	 14	92.5	16.6	 16
327	 14	75.5	13.7	 16
328	 14	81.3	11.8	 16
329	 14	92.3	14.1	 16
330	 14	82.0	10.1	 16
331	 14	196.3	44.4	 16
332	 14	107.5	16.8	 16
333	 14	80.5	14.0	 16
334	 14	61.0	13.8	 16
335	 14	56.3	13.0	 16
336	 14	65.8	23.3	 16
337	 14	60.3	10.5	 16
338	 14	82.5	15.5	 16
339	 14	258.5	24.1	 16
340	 14	192.5	30.8	 16
341	 14	156.3	27.3	 16
342	 14	63.3	10.2	 16
343	 14	53.0	8.8	 16
344	 14	60.3	13.5	 16
345	 14	68.3	15.4	 16
346	 14	84.5	14.3	 16
347	 14	54.0	8.1	 16
348	 14	69.3	13.0	 16
349	 14	102.3	22.3	 16
350	 14	303.3	46.7	 16
351	 14	118.5	14.0	 16
352	 14	60.3	7.8	 16
353	 14	223.5	42.5	 16
354	 14	77.8	18.5	 16
355	 14	119.8	12.7	 16
356	 14	277.0	48.6	 16
357	 14	235.3	32.6	 16
358	 14	113.3	25.3	 16
359	 14	63.5	11.6	 16
360	 14	60.8	11.8	 16
361	 14	159.5	35.5	 16
362	 14	87.3	15.0	 16
363	 14	54.0	9.5	 16
364	 14	60.8	14.2	 16
365	 14	51.8	7.8	 16
366	 14	79.5	15.3	 16
367	 14	120.0	22.2	 16
368	 14	64.3	12.2	 16
369	 14	67.3	12.3	 16
370	 14	153.3	28.4	 16
371	 14	203.8	28.6	 16
372	 14	283.3	38.9	 16
373	 14	125.8	25.5	 16
374	 14	58.0	11.8	 16
375	 14	89.0	17.8	 16
376	 14	71.0	14.4	 16
377	 14	240.3	29.0	 16
378	 14	77.8	15.5	 16
379	 14	135.3	14.3	 16
380	 14	132.0	19.9	 16
381	 14	55.8	11.0	 16
382	 14	78.0	12.3	 16
383	 14	96.3	14.0	 16
384	 14	125.5	20.5	 16
385	 14	65.0	16.1	 16
386	 14	71.5	15.2	 16
387	 14	79.0	11.9	 16
388	 14	74.8	13.9	 16
389	 14	78.8	17.2	 16
390	 14	75.3	15.1	 16
391	 14	69.8	14.2	 16
392	 14	57.3	9.7	 16
393	 14	63.0	11.0	 16
394	 14	272.0	35.0	 16
395	 14	75.5	12.7	 16
396	 14	121.5	14.9	 16
397	 14	257.3	27.5	 16
398	 14	86.0	16.0	 16
399	 14	77.0	17.5	 16
400	 14	99.0	15.7	 16
401	 14	134.5	21.9	 16
402	 14	83.0	11.9	 16
403	 14	64.5	9.9	 16
404	 14	72.8	13.1	 16
405	 14	66.8	10.7	 16
406	 14	221.5	31.3	 16
407	 14	176.3	29.9	 16
408	 14	60.8	13.8	 16
409	 14	68.8	11.0	 16
410	 14	69.3	16.0	 16
411	 14	72.3	11.4	 16
412	 14	86.3	16.9	 16
413	 14	99.3	15.9	 16
414	 14	82.5	14.5	 16
415	 14	129.0	23.0	 16
416	 14	56.5	6.6	 16
417	 14	65.3	11.5	 16
418	 14	122.3	9.5	 16
419	 14	73.5	13.5	 16
420	 14	58.3	11.9	 16
421	 14	49.5	7.7	 16
422	 14	87.5	14.6	 16
423	 14	63.5	13.4	 16
424	 14	80.5	13.5	 16
425	 14	71.3	11.4	 16
426	 14	53.0	9.2	 16
427	 14	117.3	27.8	 16
428	 14	100.0	20.5	 16
429	 14	114.8	13.3	 16
430	 14	65.8	12.5	 16
431	 14	138.3	18.3	 16
432	 14	176.3	26.2	 16
433	 14	265.5	31.7	 16
434	 14	187.3	31.1	 20
435	 14	70.5	11.6	 16
436	 14	67.0	12.5	 16
437	 14	98.5	17.0	 16
438	 14	203.0	24.8	 16
439	 14	112.0	36.1	 16
440	 14	66.5	10.5	 16
441	 14	72.8	14.2	 16
442	 14	90.8	17.0	 16
443	 14	67.0	11.8	 16
444	 14	80.3	16.3	 16
445	 14	70.8	12.7	 16
446	 14	78.8	16.6	 16
447	 14	64.5	15.1	 16
448	 14	65.3	12.8	 16
449	 14	59.0	10.5	 16
450	 14	55.0	12.9	 16
451	 14	56.0	11.4	 16
452	 14	60.8	12.6	 16
453	 14	58.0	12.2	 16
454	 14	65.5	13.6	 16
455	 14	88.3	33.9	 16
456	 14	49.3	7.2	 16
457	 14	53.3	11.4	 16
458	 14	97.3	17.1	 16
459	 14	77.8	11.2	 16
460	 14	80.3	12.0	 16
461	 14	77.5	10.5	 16
462	 14	160.8	30.8	 16
463	 14	66.8	10.5	 16
464	 14	65.3	13.3	 16
465	 14	83.3	10.4	 16
466	 14	82.8	14.1	 16
467	 14	76.8	11.2	 16
468	 14	69.0	11.5	 16
469	 14	57.8	12.0	 16
470	 14	122.5	17.9	 16
471	 14	117.3	16.4	 16
472	 14	69.0	12.7	 16
473	 14	127.5	24.7	 16
474	 14	104.3	16.3	 16
475	 14	65.0	9.9	 16
476	 14	59.0	11.0	 16
477	 14	57.0	8.9	 16
478	 14	57.3	7.8	 16
479	 14	64.0	12.0	 16
480	 14	5246.3	966.2	 16
481	 14	231.0	36.4	 16
482	 14	59.3	12.1	 12
483	 14	61.3	10.5	 16
484	 14	53.5	9.1	 16
485	 14	135.3	19.4	 16
486	 14	135.3	30.0	 16
487	 14	151.5	32.2	 16
488	 14	87.5	15.2	 16
489	 14	66.3	13.6	 16
490	 14	67.8	12.8	 16
491	 14	71.0	16.5	 16
492	 14	62.0	11.5	 16
493	 14	66.5	13.4	 16
494	 14	60.0	9.7	 16
495	 14	149.5	31.4	 16
496	 14	78.0	11.7	 16
497	 14	61.3	9.9	 16
498	 14	56.3	10.4	 16
499	 14	178.3	35.8	 16
500	 14	67.8	13.1	 16
501	 14	53.3	9.9	 16
502	 14	55.5	11.9	 16
503	 14	63.0	14.3	 16
504	 14	55.3	6.3	 16
505	 14	60.5	11.5	 16
506	 14	138.0	19.6	 16
507	 14	69.8	12.9	 16
508	 14	280.3	58.1	 16
509	 14	140.5	25.8	 16
510	 14	82.0	12.7	 16
511	 14	117.5	18.8	 16
512	 14	71.3	8.9	 16
513	 14	82.3	17.5	 16
514	 14	161.8	17.2	 16
515	 14	130.5	13.8	 16
516	 14	175.0	24.2	 16
517	 14	58.3	11.8	 16
518	 14	70.3	10.7	 16
519	 14	98.0	18.5	 16
520	 14	83.5	13.7	 16
521	 14	99.8	16.7	 16
522	 14	217.5	18.3	 16
523	 14	160.8	22.8	 16
524	 14	122.0	25.5	 16
525	 14	65.0	14.6	 16
526	 14	73.3	17.2	 16
527	 14	68.3	12.4	 16
528	 14	136.0	22.5	 16
529	 14	129.5	24.6	 16
530	 14	66.3	14.2	 16
531	 14	65.3	11.0	 16
532	 14	70.8	9.4	 16
533	 14	65.5	18.4	 16
534	 14	68.5	13.8	 16
535	 14	89.0	24.9	 16
536	 14	77.3	12.6	 16
537	 14	113.5	19.4	 16
538	 14	156.0	20.0	 16
539	 14	112.0	17.8	 16
540	 14	77.0	11.3	 16
541	 14	133.3	15.7	 16
542	 14	62.3	12.7	 16
543	 14	93.0	16.5	 16
544	 14	75.3	10.9	 16
545	 14	68.0	11.0	 16
546	 14	67.3	10.1	 16
547	 14	403.0	43.4	 16
548	 14	366.3	36.0	 16
549	 14	210.8	31.9	 16
550	 14	60.5	12.3	 16
551	 14	106.0	19.6	 16
552	 14	97.3	10.7	 16
553	 14	798.3	187.9	 20
554	 14	58.5	7.9	 16
555	 14	52.8	8.5	 16
556	 14	127.5	19.3	 16
557	 14	80.3	14.0	 16
558	 14	65.0	14.4	 16
559	 14	172.0	31.8	 16
560	 14	96.0	15.0	 16
561	 14	64.5	10.1	 16
562	 14	98.0	14.2	 16
563	 14	181.8	31.7	 16
564	 14	158.3	27.1	 16
565	 14	80.5	16.4	 16
566	 14	95.0	20.3	 16
567	 14	584.8	99.9	 16
568	 14	95.0	16.3	 16
569	 14	101.3	15.6	 16
570	 14	61.0	8.4	 16
571	 14	68.0	16.3	 16
572	 14	63.0	9.0	 16
573	 14	87.0	13.4	 16
574	 14	107.3	22.9	 16
575	 14	190.8	28.6	 16
576	 14	76.0	12.1	 16
577	 14	60.0	13.9	 16
578	 14	435.8	34.8	 16
579	 14	527.3	66.2	 16
580	 14	97.8	12.6	 16
581	 14	76.5	11.8	 16
582	 14	188.0	30.4	 16
583	 14	83.0	14.7	 16
584	 14	202.5	28.7	 16
585	 14	92.8	15.9	 16
586	 14	91.0	14.4	 16
587	 14	139.0	17.6	 16
588	 14	57.3	13.4	 16
589	 14	62.0	14.5	 16
590	 14	58.5	15.5	 16
591	 14	101.8	47.0	 16
592	 14	304.8	22.2	 16
593	 14	86.5	15.4	 16
594	 14	153.3	30.6	 16
595	 14	86.3	15.9	 16
596	 14	71.5	11.6	 16
597	 14	361.5	46.2	 16
598	 14	73.8	21.3	 16
599	 14	96.5	27.2	 16
600	 14	84.5	17.4	 16
601	 14	120.0	17.9	 16
602	 14	174.5	15.9	 16
603	 14	58.3	12.8	 16
604	 14	121.5	18.6	 16
605	 14	71.0	7.8	 16
606	 14	68.3	12.4	 16
607	 14	63.0	12.1	 16
608	 14	61.0	11.2	 16
609	 14	59.3	12.3	 16
610	 14	51.0	12.9	 16
611	 14	52.3	8.4	 16
612	 14	53.5	7.1	 16
613	 14	87.3	19.2	 16
614	 14	70.3	10.4	 16
615	 14	83.5	13.5	 16
616	 14	160.8	25.1	 16
617	 14	118.0	22.9	 16
618	 14	95.5	21.0	 16
619	 14	145.3	29.6	 16
620	 14	61.0	11.9	 16
621	 14	57.8	10.1	 16
622	 14	78.5	13.9	 16
623	 14	92.0	14.4	 16
624	 14	74.3	11.1	 16
625	 14	55.5	9.8	 16
626	 14	55.3	10.7	 16
627	 14	56.8	12.8	 16
628	 14	61.5	13.4	 16
629	 14	65.8	9.6	 16
630	 14	592.8	68.6	 16
631	 14	507.0	91.4	 16
632	 14	85.3	16.3	 16
633	 14	287.3	28.9	 16
634	 14	961.8	77.6	 16
635	 14	126.3	20.4	 16
636	 14	162.0	33.8	 16
637	 14	49.5	8.1	 16
638	 14	133.8	21.0	 16
639	 14	92.0	15.5	 16
640	 14	99.5	18.6	 16
641	 14	96.5	17.4	 16
642	 14	111.5	22.6	 16
643	 14	106.0	13.8	 16
644	 14	126.5	16.7	 16
645	 14	114.3	17.3	 16
646	 14	109.3	16.0	 16
647	 14	95.0	16.1	 16
648	 14	69.3	10.1	 16
649	 14	53.5	10.3	 16
650	 14	57.5	9.4	 16
651	 14	72.5	17.7	 16
652	 14	106.5	17.4	 16
653	 14	71.0	14.3	 16
654	 14	60.5	11.7	 16
655	 14	63.3	11.5	 16
656	 14	55.5	12.4	 16
657	 14	69.3	14.8	 16
658	 14	156.8	19.2	 16
659	 14	146.8	30.2	 16
660	 14	1528.0	206.7	 16
661	 14	387.5	57.1	 16
662	 14	210.0	25.6	 16
663	 14	142.5	19.6	 16
664	 14	330.0	45.5	 16
665	 14	102.5	14.3	 16
666	 14	615.0	86.2	 16
667	 14	59.5	11.1	 16
668	 14	160.8	24.5	 16
669	 14	58.5	8.5	 16
670	 14	95.0	14.6	 16
671	 14	64.0	11.4	 20
672	 14	63.8	9.6	 16
673	 14	71.3	16.1	 16
674	 14	73.3	9.1	 16
675	 14	61.8	11.6	 16
676	 14	64.5	13.5	 16
677	 14	93.5	18.0	 16
678	 14	74.0	9.9	 16
679	 14	80.0	16.1	 16
680	 14	426.3	84.7	 16
681	 14	54.3	13.0	 16
682	 14	97.0	16.6	 16
683	 14	97.3	19.2	 16
684	 14	105.8	20.1	 16
685	 14	78.5	13.5	 16
686	 14	63.8	11.1	 16
687	 14	72.0	18.3	 16
688	 14	72.8	13.0	 16
689	 14	276.0	73.4	 16
690	 14	102.3	14.1	 16
691	 14	158.0	10.4	 16
692	 14	129.3	19.0	 16
693	 14	213.3	47.6	 16
694	 14	75.5	13.5	 16
695	 14	59.5	11.4	 16
696	 14	93.0	17.8	 16
697	 14	120.3	23.0	 16
698	 14	854.5	153.2	 16
699	 14	371.5	59.6	 16
700	 14	107.3	20.2	 16
701	 14	156.8	21.8	 16
702	 14	511.8	60.4	 16
703	 14	130.5	29.7	 16
704	 14	186.0	27.7	 16
705	 14	193.5	31.5	 16
706	 14	194.3	20.6	 16
707	 14	490.5	46.4	 16
708	 14	113.8	16.5	 16
709	 14	88.5	13.8	 16
710	 14	235.3	26.5	 16
711	 14	7030.0	826.0	 16
  0	 15	95.0	11.6	 16
  1	 15	113.3	21.3	 16
  2	 15	124.3	18.4	 16
  3	 15	104.8	17.7	 16
  4	 15	178.0	24.0	 16
  5	 15	72.5	13.6	 16
  6	 15	137.3	22.1	 16
  7	 15	672.3	81.0	 16
  8	 15	92.3	17.4	 16
  9	 15	108.5	15.1	 16
 10	 15	113.8	19.5	 16
 11	 15	82.0	12.5	 16
 12	 15	871.8	120.4	 16
 13	 15	107.0	48.2	 16
 14	 15	71.8	9.9	 16
 15	 15	90.8	13.3	 16
 16	 15	219.0	19.7	 16
 17	 15	189.5	30.3	 16
 18	 15	354.8	56.5	 16
 19	 15	672.8	87.1	 16
 20	 15	294.5	60.6	 16
 21	 15	95.0	17.8	 16
 22	 15	73.5	16.1	 16
 23	 15	256.3	56.9	 16
 24	 15	384.5	55.0	 16
 25	 15	120.8	28.9	 16
 26	 15	89.5	15.2	 16
 27	 15	79.0	14.8	 16
 28	 15	1890.3	402.6	 16
 29	 15	1348.5	271.7	 16
 30	 15	180.5	35.7	 16
 31	 15	479.3	93.2	 16
 32	 15	58.5	8.7	 16
 33	 15	1430.0	277.8	 16
 34	 15	87.3	16.5	 16
 35	 15	106.0	20.4	 16
 36	 15	71.3	16.4	 16
 37	 15	278.3	50.7	 16
 38	 15	101.0	20.4	 16
 39	 15	71.0	15.0	 16
 40	 15	78.0	14.9	 16
 41	 15	350.0	70.3	 16
 42	 15	90.0	13.1	 16
 43	 15	151.8	26.2	 16
 44	 15	177.8	27.7	 16
 45	 15	117.0	24.1	 16
 46	 15	117.3	19.4	 16
 47	 15	125.5	28.5	 16
 48	 15	1321.8	205.6	 16
 49	 15	360.0	45.0	 16
 50	 15	938.3	170.2	 16
 51	 15	171.0	25.3	 16
 52	 15	148.3	22.6	 16
 53	 15	257.8	48.9	 16
 54	 15	66.3	11.6	 16
 55	 15	67.3	12.8	 16
 56	 15	99.8	20.7	 16
 57	 15	102.3	17.2	 16
 58	 15	1810.0	317.2	 16
 59	 15	1068.0	202.0	 16
 60	 15	141.0	30.5	 16
 61	 15	242.8	49.5	 16
 62	 15	394.5	63.0	 16
 63	 15	62.0	13.4	 16
 64	 15	230.3	27.8	 16
 65	 15	305.8	43.0	 16
 66	 15	87.5	9.9	 16
 67	 15	100.0	14.2	 16
 68	 15	538.0	51.1	 16
 69	 15	140.8	25.1	 16
 70	 15	298.3	52.0	 16
 71	 15	181.8	26.5	 16
 72	 15	119.0	16.3	 16
 73	 15	280.3	29.6	 16
 74	 15	803.5	94.9	 16
 75	 15	64.5	12.2	 16
 76	 15	1746.8	147.7	 16
 77	 15	88.0	10.9	 16
 78	 15	48.8	5.7	 16
 79	 15	370.5	107.4	 20
 80	 15	62.0	9.9	 16
 81	 15	207.5	54.2	 16
 82	 15	55.3	9.0	 16
 83	 15	71.3	12.5	 16
 84	 15	107.3	21.4	 16
 85	 15	1003.3	291.7	 16
 86	 15	345.3	69.5	 16
 87	 15	217.3	57.5	 16
 88	 15	89.5	18.7	 16
 89	 15	363.8	67.6	 16
 90	 15	186.5	36.5	 16
 91	 15	223.0	27.6	 16
 92	 15	341.0	64.7	 16
 93	 15	387.5	88.0	 16
 94	 15	1773.8	350.9	 16
 95	 15	592.8	95.6	 16
 96	 15	910.3	176.0	 16
 97	 15	75.3	14.0	 16
 98	 15	175.3	23.9	 16
 99	 15	144.3	28.8	 16
100	 15	85.5	20.8	 16
101	 15	6023.0	1189.4	 16
102	 15	318.3	64.6	 16
103	 15	79.3	14.8	 16
104	 15	2366.0	429.4	 16
105	 15	420.8	84.5	 16
106	 15	115.5	19.0	 16
107	 15	58.5	15.4	 16
108	 15	160.0	26.3	 16
109	 15	326.0	64.7	 16
110	 15	76.3	9.4	 16
111	 15	169.0	25.3	 16
112	 15	149.3	19.8	 16
113	 15	98.5	23.9	 16
114	 15	245.8	28.4	 16
115	 15	339.3	51.2	 16
116	 15	232.3	28.9	 16
117	 15	130.3	114.4	 16
118	 15	322.5	61.4	 16
119	 15	77.3	17.1	 16
120	 15	337.0	57.4	 16
121	 15	222.8	29.9	 16
122	 15	82.0	15.7	 16
123	 15	298.3	51.4	 16
124	 15	139.0	22.6	 16
125	 15	83.8	12.3	 16
126	 15	387.3	80.0	 16
127	 15	71.5	12.4	 16
128	 15	78.3	12.5	 16
129	 15	53.8	9.0	 16
130	 15	77.8	16.9	 16
131	 15	969.8	208.2	 16
132	 15	360.5	68.5	 16
133	 15	91.0	13.5	 16
134	 15	551.3	118.9	 16
135	 15	56.3	9.9	 16
136	 15	109.0	15.4	 16
137	 15	2483.5	586.7	 16
138	 15	1728.3	425.5	 16
139	 15	286.0	59.2	 16
140	 15	243.0	62.2	 16
141	 15	92.8	17.5	 16
142	 15	99.0	22.7	 16
143	 15	104.0	20.3	 16
144	 15	450.0	49.5	 16
145	 15	410.5	70.9	 16
146	 15	166.8	31.8	 16
147	 15	61.3	9.9	 12
148	 15	454.8	58.5	 16
149	 15	114.3	21.3	 16
150	 15	174.0	24.8	 16
151	 15	291.0	42.5	 16
152	 15	295.8	59.0	 16
153	 15	244.3	27.8	 16
154	 15	158.8	19.9	 16
155	 15	59.5	13.3	 16
156	 15	108.8	22.5	 16
157	 15	221.5	40.2	 16
158	 15	144.3	21.4	 16
159	 15	327.8	54.0	 16
160	 15	392.8	49.1	 16
161	 15	1600.0	183.0	 16
162	 15	84.5	13.0	 16
163	 15	108.0	19.1	 16
164	 15	62.0	11.1	 16
165	 15	68.5	14.1	 16
166	 15	103.0	27.2	 16
167	 15	338.8	39.6	 16
168	 15	226.8	40.8	 16
169	 15	149.0	17.9	 16
170	 15	101.5	17.5	 16
171	 15	70.3	9.0	 16
172	 15	75.5	15.6	 16
173	 15	70.3	12.0	 16
174	 15	54.3	10.9	 16
175	 15	90.3	12.0	 16
176	 15	81.3	20.0	 16
177	 15	129.8	21.9	 16
178	 15	445.5	48.2	 16
179	 15	112.3	16.1	 16
180	 15	105.5	16.3	 16
181	 15	88.3	13.6	 16
182	 15	552.0	43.9	 16
183	 15	97.8	14.3	 16
184	 15	90.8	13.8	 16
185	 15	100.0	17.2	 16
186	 15	98.3	17.0	 16
187	 15	67.8	11.5	 16
188	 15	724.0	114.2	 16
189	 15	304.3	40.2	 16
190	 15	384.5	58.1	 16
191	 15	68.0	8.5	 16
192	 15	123.0	19.0	 16
193	 15	112.3	19.9	 16
194	 15	254.3	37.3	 16
195	 15	159.3	24.9	 16
196	 15	96.5	19.8	 16
197	 15	436.3	43.1	 16
198	 15	59.5	11.4	 20
199	 15	58.8	11.1	 16
200	 15	65.8	10.3	 16
201	 15	587.0	128.3	 16
202	 15	149.3	21.0	 16
203	 15	227.0	46.0	 16
204	 15	68.0	8.8	 16
205	 15	322.8	63.5	 16
206	 15	398.8	76.6	 16
207	 15	86.0	18.0	 16
208	 15	146.8	22.7	 16
209	 15	134.5	22.0	 16
210	 15	141.3	28.6	 16
211	 15	109.5	20.7	 16
212	 15	103.0	16.4	 16
213	 15	68.5	12.8	 16
214	 15	199.5	43.7	 16
215	 15	97.5	15.4	 16
216	 15	1461.5	320.9	 16
217	 15	109.0	17.5	 16
218	 15	3213.5	648.5	 16
219	 15	664.3	139.2	 16
220	 15	188.5	40.3	 16
221	 15	182.8	25.5	 16
222	 15	116.3	22.2	 16
223	 15	86.5	19.5	 16
224	 15	72.8	17.2	 16
225	 15	100.3	19.0	 16
226	 15	167.3	33.1	 16
227	 15	45.3	15.9	 16
228	 15	88.3	17.3	 16
229	 15	443.0	57.0	 16
230	 15	107.8	16.1	 16
231	 15	75.0	12.9	 16
232	 15	206.3	36.9	 16
233	 15	47.3	6.5	 16
234	 15	98.3	16.1	 16
235	 15	439.8	41.2	 16
236	 15	776.8	87.6	 16
237	 15	352.3	54.4	 16
238	 15	868.3	152.4	 16
239	 15	111.8	17.9	 16
240	 15	108.3	22.9	 16
241	 15	395.0	62.6	 16
242	 15	1154.3	160.0	 16
243	 15	59.5	11.6	 16
244	 15	92.8	13.7	 16
245	 15	177.0	34.9	 16
246	 15	200.3	34.4	 16
247	 15	72.3	9.8	 16
248	 15	352.3	55.2	 16
249	 15	1344.8	586.0	 16
250	 15	51.5	8.9	 16
251	 15	73.3	8.3	 16
252	 15	411.8	63.4	 16
253	 15	144.0	31.7	 16
254	 15	1151.0	158.4	 16
255	 15	137.8	17.2	 16
256	 15	205.5	27.0	 16
257	 15	532.8	52.6	 16
258	 15	64.5	10.5	 16
259	 15	56.3	9.1	 16
260	 15	158.5	22.9	 16
261	 15	90.5	18.2	 16
262	 15	186.8	24.0	 16
263	 15	136.0	22.9	 16
264	 15	323.3	36.3	 16
265	 15	98.3	16.4	 16
266	 15	68.8	10.5	 16
267	 15	86.8	14.8	 16
268	 15	139.8	17.0	 16
269	 15	233.0	26.9	 16
270	 15	71.3	15.7	 16
271	 15	76.5	20.9	 16
272	 15	219.3	43.5	 16
273	 15	76.5	14.2	 16
274	 15	322.3	41.9	 16
275	 15	337.0	40.1	 16
276	 15	228.0	31.9	 16
277	 15	78.5	18.4	 16
278	 15	57.8	13.9	 16
279	 15	306.3	53.3	 16
280	 15	508.0	51.7	 16
281	 15	83.8	12.9	 16
282	 15	342.5	50.9	 16
283	 15	65.0	9.0	 16
284	 15	85.5	16.9	 16
285	 15	104.5	11.7	 16
286	 15	110.0	23.7	 16
287	 15	277.5	25.6	 16
288	 15	1671.5	193.0	 16
289	 15	103.0	17.7	 16
290	 15	299.8	46.2	 16
291	 15	115.5	18.4	 16
292	 15	2307.0	249.4	 16
293	 15	620.0	46.5	 16
294	 15	108.3	12.3	 16
295	 15	69.3	8.2	 16
296	 15	384.3	42.3	 16
297	 15	1643.0	157.9	 16
298	 15	152.0	14.4	 16
299	 15	121.3	19.5	 16
300	 15	62.0	11.5	 16
301	 15	118.0	18.4	 16
302	 15	75.5	12.1	 16
303	 15	63.8	12.5	 16
304	 15	660.3	107.8	 16
305	 15	64.8	10.0	 16
306	 15	181.0	23.7	 16
307	 15	214.0	40.3	 16
308	 15	308.0	43.5	 16
309	 15	131.5	42.5	 16
310	 15	292.3	35.5	 16
311	 15	276.0	30.4	 16
312	 15	145.5	61.6	 16
313	 15	80.0	13.2	 16
314	 15	153.5	21.0	 16
315	 15	214.5	33.2	 16
316	 15	691.0	84.5	 16
317	 15	189.5	47.7	 20
318	 15	105.0	18.6	 16
319	 15	275.5	66.0	 16
320	 15	134.3	26.8	 16
321	 15	149.8	22.4	 16
322	 15	224.8	52.3	 16
323	 15	159.0	61.6	 16
324	 15	991.0	173.5	 16
325	 15	103.5	17.7	 16
326	 15	124.3	30.2	 16
327	 15	160.3	43.3	 16
328	 15	63.0	8.0	 16
329	 15	64.8	15.2	 16
330	 15	1455.0	397.0	 16
331	 15	386.3	88.2	 16
332	 15	397.5	75.9	 16
333	 15	483.8	120.2	 16
334	 15	77.5	18.5	 16
335	 15	59.8	13.2	 16
336	 15	74.5	16.4	 16
337	 15	359.5	57.2	 16
338	 15	519.5	57.5	 16
339	 15	607.5	117.6	 16
340	 15	152.8	23.9	 16
341	 15	138.0	22.5	 16
342	 15	68.8	18.8	 16
343	 15	63.5	14.4	 16
344	 15	268.8	47.6	 16
345	 15	124.3	23.5	 16
346	 15	248.5	56.5	 16
347	 15	66.0	11.3	 16
348	 15	607.8	129.0	 16
349	 15	78.8	22.1	 16
350	 15	148.5	18.9	 16
351	 15	106.3	23.0	 16
352	 15	70.0	13.6	 16
353	 15	266.5	45.3	 16
354	 15	55.8	11.6	 16
355	 15	212.0	29.7	 16
356	 15	571.5	65.1	 16
357	 15	255.0	22.0	 16
358	 15	258.5	42.8	 16
359	 15	673.0	110.1	 16
360	 15	54.8	15.1	 16
361	 15	109.0	12.5	 16
362	 15	363.8	51.6	 16
363	 15	65.5	7.3	 16
364	 15	198.0	31.1	 16
365	 15	80.3	12.9	 16
366	 15	152.8	25.8	 16
367	 15	236.8	37.9	 16
368	 15	84.8	14.7	 16
369	 15	62.3	13.1	 16
370	 15	79.3	16.5	 16
371	 15	89.3	16.1	 16
372	 15	149.8	21.0	 16
373	 15	528.5	57.2	 16
374	 15	71.3	12.8	 16
375	 15	214.3	23.1	 16
376	 15	250.5	30.1	 16
377	 15	103.0	13.2	 16
378	 15	103.0	21.3	 16
379	 15	182.3	21.1	 16
380	 15	73.5	18.8	 16
381	 15	54.5	10.8	 16
382	 15	52.3	7.1	 16
383	 15	136.8	15.8	 16
384	 15	69.3	19.6	 16
385	 15	744.3	83.0	 16
386	 15	100.0	16.5	 16
387	 15	571.5	50.0	 16
388	 15	316.0	28.4	 16
389	 15	198.3	25.3	 16
390	 15	65.3	11.8	 16
391	 15	69.5	10.6	 16
392	 15	72.0	11.1	 16
393	 15	932.0	130.9	 16
394	 15	676.5	77.3	 16
395	 15	192.3	24.0	 16
396	 15	65.0	9.7	 16
397	 15	90.8	14.6	 16
398	 15	81.5	17.5	 16
399	 15	74.0	11.0	 16
400	 15	160.5	17.6	 16
401	 15	147.0	19.9	 16
402	 15	142.3	16.9	 16
403	 15	112.0	24.1	 16
404	 15	2369.0	112.9	 16
405	 15	262.3	26.5	 16
406	 15	133.8	20.3	 16
407	 15	1823.8	185.0	 16
408	 15	314.0	26.0	 16
409	 15	77.5	8.8	 16
410	 15	197.8	28.7	 16
411	 15	379.5	40.8	 16
412	 15	72.3	10.5	 16
413	 15	552.5	68.5	 16
414	 15	89.3	14.4	 16
415	 15	278.0	27.6	 16
416	 15	214.5	27.4	 16
417	 15	791.8	69.1	 16
418	 15	238.0	22.0	 16
419	 15	275.0	30.8	 16
420	 15	75.3	16.8	 16
421	 15	97.0	13.2	 16
422	 15	84.3	12.5	 16
423	 15	376.5	54.5	 16
424	 15	185.3	21.8	 16
425	 15	64.5	12.1	 16
426	 15	55.8	8.0	 16
427	 15	169.3	25.2	 16
428	 15	53.5	8.7	 16
429	 15	69.5	13.7	 16
430	 15	79.3	14.8	 16
431	 15	10833.5	919.7	 16
432	 15	98.0	20.6	 16
433	 15	132.8	24.0	 16
434	 15	1145.5	148.4	 16
435	 15	482.5	119.3	 20
436	 15	115.3	18.2	 16
437	 15	297.5	39.2	 16
438	 15	194.0	35.5	 16
439	 15	147.5	27.8	 16
440	 15	9535.3	2847.2	 16
441	 15	231.5	53.0	 16
442	 15	62.3	9.2	 16
443	 15	150.0	23.5	 16
444	 15	381.0	60.6	 16
445	 15	504.3	120.2	 16
446	 15	298.0	34.9	 16
447	 15	314.3	34.5	 16
448	 15	310.3	26.0	 16
449	 15	347.8	29.4	 16
450	 15	367.5	81.1	 16
451	 15	1739.3	475.4	 16
452	 15	68.3	15.0	 16
453	 15	377.5	98.6	 16
454	 15	868.3	197.7	 16
455	 15	75.5	15.2	 16
456	 15	48.3	8.9	 16
457	 15	306.3	71.3	 16
458	 15	557.0	117.5	 16
459	 15	118.5	18.9	 16
460	 15	88.0	14.2	 16
461	 15	107.0	23.5	 16
462	 15	66.0	12.6	 16
463	 15	57.0	12.5	 16
464	 15	169.0	28.8	 16
465	 15	64.3	12.2	 16
466	 15	118.5	23.0	 16
467	 15	242.3	30.1	 16
468	 15	217.0	38.7	 16
469	 15	749.8	162.2	 16
470	 15	80.5	13.0	 16
471	 15	326.3	59.7	 16
472	 15	90.8	12.5	 16
473	 15	141.8	27.1	 16
474	 15	166.5	22.9	 16
475	 15	130.8	19.4	 16
476	 15	76.5	13.8	 16
477	 15	257.0	34.2	 16
478	 15	1027.5	160.8	 16
479	 15	145.5	17.0	 16
480	 15	66.0	10.9	 16
481	 15	606.0	139.4	 16
482	 15	60.5	12.9	 16
483	 15	61.5	10.7	 16
484	 15	70.5	14.9	 16
485	 15	59.5	11.8	 16
486	 15	179.3	34.6	 16
487	 15	71.3	18.0	 16
488	 15	116.5	26.1	 16
489	 15	70.3	9.8	 16
490	 15	81.0	14.5	 16
491	 15	59.3	7.1	 16
492	 15	614.8	132.2	 16
493	 15	109.0	15.0	 16
494	 15	64.8	10.3	 16
495	 15	74.3	15.9	 16
496	 15	509.5	93.2	 16
497	 15	62.5	12.7	 16
498	 15	62.5	10.7	 16
499	 15	85.3	16.0	 16
500	 15	68.5	13.7	 16
501	 15	78.0	13.0	 16
502	 15	109.3	25.3	 16
503	 15	687.0	130.4	 16
504	 15	143.0	22.1	 16
505	 15	510.0	91.7	 16
506	 15	76.5	6.4	 16
507	 15	831.3	137.3	 16
508	 15	135.5	20.8	 16
509	 15	78.8	12.9	 16
510	 15	97.5	21.5	 16
511	 15	212.0	45.4	 16
512	 15	64.3	9.3	 16
513	 15	94.5	14.2	 16
514	 15	68.5	11.1	 16
515	 15	152.0	21.1	 16
516	 15	102.0	13.1	 16
517	 15	242.5	46.9	 16
518	 15	85.5	13.7	 16
519	 15	130.0	19.0	 16
520	 15	59.5	12.3	 16
521	 15	63.3	9.7	 16
522	 15	130.5	23.9	 16
523	 15	474.3	68.5	 16
524	 15	51.5	13.8	 16
525	 15	513.8	39.6	 16
526	 15	290.3	33.8	 16
527	 15	109.0	44.4	 16
528	 15	423.5	45.1	 16
529	 15	160.3	23.0	 16
530	 15	261.3	29.8	 16
531	 15	188.0	27.3	 16
532	 15	53.3	7.6	 16
533	 15	63.3	12.7	 16
534	 15	57.5	11.0	 16
535	 15	667.8	73.8	 16
536	 15	223.3	35.8	 16
537	 15	274.0	37.1	 16
538	 15	248.3	29.7	 16
539	 15	102.8	17.0	 16
540	 15	2926.3	166.8	 16
541	 15	70.5	18.6	 16
542	 15	89.5	16.5	 16
543	 15	116.8	17.7	 16
544	 15	856.3	81.4	 16
545	 15	351.8	44.7	 16
546	 15	79.3	17.4	 16
547	 15	600.8	60.4	 16
548	 15	137.0	21.1	 16
549	 15	63.0	10.3	 16
550	 15	52.5	9.9	 16
551	 15	60.3	9.9	 16
552	 15	256.0	27.7	 16
553	 15	896.3	106.7	 16
554	 15	156.3	20.2	 20
555	 15	81.3	18.7	 16
556	 15	1016.8	194.7	 16
557	 15	436.5	74.0	 16
558	 15	73.3	11.7	 16
559	 15	312.0	56.3	 16
560	 15	59.0	10.7	 16
561	 15	445.5	107.6	 16
562	 15	105.0	18.2	 16
563	 15	203.0	41.3	 16
564	 15	92.0	16.2	 16
565	 15	96.8	16.8	 16
566	 15	447.3	83.6	 16
567	 15	168.3	29.6	 16
568	 15	162.5	24.7	 16
569	 15	182.0	29.7	 16
570	 15	467.8	67.7	 16
571	 15	141.3	26.9	 16
572	 15	157.5	20.8	 16
573	 15	1958.0	272.9	 16
574	 15	58.5	9.6	 16
575	 15	61.3	14.9	 16
576	 15	329.8	37.2	 16
577	 15	573.0	65.7	 16
578	 15	73.8	14.2	 16
579	 15	109.3	12.5	 16
580	 15	469.8	41.2	 16
581	 15	121.3	28.2	 16
582	 15	92.3	8.4	 16
583	 15	105.8	17.0	 16
584	 15	114.5	16.7	 16
585	 15	133.3	17.0	 16
586	 15	1102.5	83.2	 16
587	 15	136.0	20.3	 16
588	 15	138.8	24.3	 16
589	 15	57.3	12.2	 16
590	 15	380.8	371.2	 16
591	 15	99.3	13.9	 16
592	 15	518.0	63.9	 16
593	 15	192.3	28.6	 16
594	 15	91.0	16.1	 16
595	 15	167.0	19.7	 16
596	 15	218.0	26.1	 16
597	 15	169.5	31.0	 16
598	 15	181.3	23.1	 16
599	 15	241.0	21.1	 16
600	 15	711.0	79.1	 16
601	 15	284.0	35.5	 16
602	 15	297.5	40.8	 16
603	 15	51.0	9.3	 16
604	 15	160.0	24.5	 16
605	 15	257.0	31.7	 16
606	 15	187.8	31.4	 16
607	 15	1050.5	170.5	 16
608	 15	810.8	92.9	 16
609	 15	133.8	21.7	 16
610	 15	61.0	8.1	 16
611	 15	54.5	14.9	 16
612	 15	122.0	21.2	 16
613	 15	320.0	50.5	 16
614	 15	470.5	82.1	 16
615	 15	88.5	17.4	 16
616	 15	153.8	21.2	 16
617	 15	820.8	83.2	 16
618	 15	81.8	13.9	 16
619	 15	210.3	17.5	 16
620	 15	736.5	82.3	 16
621	 15	430.5	55.3	 16
622	 15	3524.5	223.7	 16
623	 15	744.0	74.6	 16
624	 15	80.3	15.7	 16
625	 15	257.8	32.1	 16
626	 15	79.0	18.1	 16
627	 15	129.0	18.9	 16
628	 15	132.0	19.9	 16
629	 15	129.5	24.2	 16
630	 15	245.3	35.6	 16
631	 15	119.0	16.9	 16
632	 15	201.0	29.4	 16
633	 15	463.5	39.7	 16
634	 15	501.0	46.9	 16
635	 15	259.8	29.6	 16
636	 15	420.8	41.6	 16
637	 15	252.0	39.8	 16
638	 15	609.0	72.9	 16
639	 15	128.8	16.6	 16
640	 15	248.5	34.6	 16
641	 15	243.3	33.4	 16
642	 15	121.3	20.4	 16
643	 15	627.0	78.2	 16
644	 15	219.8	26.8	 16
645	 15	153.5	28.3	 16
646	 15	268.0	44.5	 16
647	 15	89.0	19.3	 16
648	 15	537.8	82.3	 16
649	 15	337.5	40.4	 16
650	 15	66.3	12.4	 16
651	 15	61.8	9.7	 16
652	 15	72.0	10.4	 16
653	 15	210.5	16.0	 16
654	 15	64.5	14.7	 16
655	 15	68.0	13.5	 16
656	 15	4595.8	382.0	 16
657	 15	73.0	10.1	 16
658	 15	101.5	16.7	 16
659	 15	75.3	11.3	 16
660	 15	397.8	49.1	 16
661	 15	92.8	18.0	 16
662	 15	6260.3	553.3	 16
663	 15	104.3	19.1	 16
664	 15	106.8	25.1	 16
665	 15	361.3	28.3	 16
666	 15	47.3	8.4	 16
667	 15	58.3	9.5	 16
668	 15	142.5	18.9	 16
669	 15	83.3	14.3	 16
670	 15	98.3	19.4	 16
671	 15	564.5	48.5	 16
672	 15	108.8	16.1	 16
673	 15	390.5	61.4	 20
674	 15	141.8	21.5	 16
675	 15	4411.8	879.3	 16
676	 15	227.0	43.0	 16
677	 15	90.0	16.3	 16
678	 15	441.5	87.0	 16
679	 15	110.0	14.3	 16
680	 15	57.5	14.1	 16
681	 15	60.8	12.4	 16
682	 15	63.5	13.6	 16
683	 15	208.0	21.8	 16
684	 15	204.5	28.7	 16
685	 15	252.3	44.7	 16
686	 15	1330.3	214.5	 16
687	 15	124.3	23.3	 16
688	 15	406.5	73.6	 16
689	 15	65.3	8.4	 16
690	 15	710.5	129.5	 16
691	 15	139.3	21.9	 16
692	 15	8545.3	1207.0	 16
693	 15	71.5	13.0	 16
694	 15	330.8	44.9	 16
695	 15	62.0	10.2	 16
696	 15	71.8	15.2	 16
697	 15	230.3	27.2	 16
698	 15	214.5	28.9	 16
699	 15	150.0	32.9	 16
700	 15	89.5	15.6	 16
701	 15	209.3	30.4	 16
702	 15	298.8	41.0	 16
703	 15	71.8	14.1	 16
704	 15	364.0	30.1	 16
705	 15	466.0	50.2	 16
706	 15	127.8	22.0	 16
707	 15	152.3	19.9	 16
708	 15	777.5	73.6	 16
709	 15	70.5	10.6	 16
710	 15	3798.0	458.3	 16
711	 15	97.0	12.4	 16
  0	 16	8976.8	961.0	 16
  1	 16	90.3	17.9	 16
  2	 16	70.0	13.7	 16
  3	 16	66.3	13.1	 16
  4	 16	69.3	11.5	 16
  5	 16	91.3	10.9	 16
  6	 16	107.3	20.0	 16
  7	 16	126.8	25.3	 16
  8	 16	77.0	14.0	 16
  9	 16	86.3	14.3	 16
 10	 16	62.3	8.8	 16
 11	 16	59.0	13.9	 16
 12	 16	178.0	27.2	 16
 13	 16	70.3	16.3	 16
 14	 16	61.0	11.2	 16
 15	 16	73.0	17.4	 16
 16	 16	244.8	33.0	 16
 17	 16	164.0	22.0	 16
 18	 16	106.3	17.2	 16
 19	 16	205.8	28.4	 16
 20	 16	115.5	14.9	 16
 21	 16	59.8	11.2	 16
 22	 16	68.5	10.5	 16
 23	 16	70.5	15.6	 16
 24	 16	134.8	21.7	 16
 25	 16	82.3	12.2	 16
 26	 16	69.8	15.5	 16
 27	 16	54.3	7.8	 16
 28	 16	134.0	23.0	 16
 29	 16	167.5	31.1	 16
 30	 16	95.3	13.2	 16
 31	 16	147.8	26.5	 16
 32	 16	61.3	11.1	 16
 33	 16	103.3	17.7	 16
 34	 16	83.8	21.8	 16
 35	 16	107.5	14.9	 16
 36	 16	63.5	11.5	 16
 37	 16	63.0	10.6	 16
 38	 16	59.3	9.8	 16
 39	 16	65.5	10.3	 16
 40	 16	53.0	8.5	 16
 41	 16	92.3	19.1	 16
 42	 16	100.5	13.3	 16
 43	 16	163.0	28.3	 16
 44	 16	168.5	24.7	 16
 45	 16	122.8	18.9	 16
 46	 16	78.3	13.4	 16
 47	 16	111.3	19.4	 16
 48	 16	756.3	78.2	 16
 49	 16	164.3	25.9	 16
 50	 16	190.8	33.1	 16
 51	 16	234.5	25.7	 16
 52	 16	169.0	24.1	 16
 53	 16	93.5	16.0	 16
 54	 16	74.5	11.2	 16
 55	 16	72.3	9.3	 16
 56	 16	112.8	25.6	 16
 57	 16	111.8	18.1	 16
 58	 16	581.3	70.0	 16
 59	 16	107.3	16.2	 16
 60	 16	75.8	12.1	 16
 61	 16	86.5	15.9	 16
 62	 16	114.3	16.1	 16
 63	 16	62.0	8.0	 16
 64	 16	298.0	37.7	 16
 65	 16	101.0	16.9	 16
 66	 16	55.3	9.1	 16
 67	 16	132.5	21.0	 16
 68	 16	211.8	37.5	 16
 69	 16	242.8	24.7	 16
 70	 16	219.3	34.7	 16
 71	 16	115.5	15.5	 16
 72	 16	390.3	38.1	 16
 73	 16	285.8	38.9	 16
 74	 16	1691.8	205.6	 16
 75	 16	58.3	12.9	 16
 76	 16	551.0	94.0	 16
 77	 16	100.8	13.8	 16
 78	 16	68.0	13.4	 16
 79	 16	68.0	15.8	 16
 80	 16	54.3	7.2	 16
 81	 16	134.5	26.7	 20
 82	 16	57.5	8.9	 16
 83	 16	65.0	10.1	 16
 84	 16	71.8	10.7	 16
 85	 16	101.3	22.0	 16
 86	 16	72.8	13.4	 16
 87	 16	59.0	10.6	 16
 88	 16	74.3	9.6	 16
 89	 16	98.5	15.2	 16
 90	 16	109.5	19.6	 16
 91	 16	126.8	25.0	 16
 92	 16	121.3	11.6	 16
 93	 16	80.5	10.3	 16
 94	 16	125.3	19.0	 16
 95	 16	179.3	27.5	 16
 96	 16	217.5	40.7	 16
 97	 16	61.5	9.9	 16
 98	 16	91.3	13.4	 16
 99	 16	69.8	15.2	 16
100	 16	78.3	11.8	 16
101	 16	1144.0	212.4	 16
102	 16	65.5	8.0	 16
103	 16	68.8	11.6	 16
104	 16	259.8	36.2	 16
105	 16	254.0	29.3	 16
106	 16	81.0	16.4	 16
107	 16	46.5	10.6	 16
108	 16	129.0	15.7	 16
109	 16	66.8	12.4	 16
110	 16	62.3	13.9	 16
111	 16	179.8	23.9	 16
112	 16	104.0	14.6	 16
113	 16	116.0	28.4	 16
114	 16	161.3	16.9	 16
115	 16	258.8	34.8	 16
116	 16	100.3	15.3	 16
117	 16	167.3	24.2	 16
118	 16	271.0	46.4	 16
119	 16	75.3	10.9	 16
120	 16	69.3	13.3	 16
121	 16	132.0	19.9	 16
122	 16	65.3	11.9	 16
123	 16	81.0	17.8	 16
124	 16	87.3	16.6	 16
125	 16	72.0	14.3	 16
126	 16	94.0	22.8	 16
127	 16	55.3	8.7	 16
128	 16	73.0	12.8	 16
129	 16	56.3	10.4	 16
130	 16	67.0	12.2	 16
131	 16	142.3	25.4	 16
132	 16	105.8	23.6	 16
133	 16	84.0	16.5	 16
134	 16	66.3	14.6	 16
135	 16	61.8	12.2	 16
136	 16	54.3	8.0	 16
137	 16	733.3	170.2	 16
138	 16	224.5	54.5	 16
139	 16	122.0	21.4	 16
140	 16	64.8	12.1	 16
141	 16	70.3	11.9	 16
142	 16	64.0	14.7	 16
143	 16	163.8	33.7	 16
144	 16	492.8	37.7	 16
145	 16	176.5	27.0	 16
146	 16	89.8	16.3	 16
147	 16	81.8	20.6	 16
148	 16	842.8	156.1	 16
149	 16	175.0	49.8	 16
150	 16	137.5	21.7	 16
151	 16	183.3	36.8	 16
152	 16	74.0	13.8	 16
153	 16	79.0	13.8	 16
154	 16	92.0	17.6	 16
155	 16	59.3	11.0	 16
156	 16	55.3	13.1	 16
157	 16	126.5	16.9	 16
158	 16	142.5	15.7	 16
159	 16	249.0	36.0	 16
160	 16	595.8	90.5	 16
161	 16	450.8	77.9	 16
162	 16	70.5	9.4	 16
163	 16	79.8	14.7	 16
164	 16	53.8	10.4	 16
165	 16	58.0	11.2	 16
166	 16	70.0	11.3	 16
167	 16	100.0	15.6	 16
168	 16	88.0	13.5	 16
169	 16	73.3	9.6	 16
170	 16	67.0	13.5	 16
171	 16	54.8	7.8	 16
172	 16	92.5	19.9	 16
173	 16	77.3	12.1	 16
174	 16	59.3	10.8	 16
175	 16	58.3	8.4	 16
176	 16	63.8	12.2	 16
177	 16	185.0	26.2	 16
178	 16	1981.0	113.2	 16
179	 16	129.8	17.2	 16
180	 16	81.0	14.6	 16
181	 16	214.3	37.2	 16
182	 16	260.5	24.4	 16
183	 16	172.3	19.8	 16
184	 16	134.0	22.5	 16
185	 16	73.5	16.5	 16
186	 16	63.8	10.2	 16
187	 16	66.8	11.8	 16
188	 16	231.3	37.8	 16
189	 16	168.8	34.2	 16
190	 16	186.3	37.0	 16
191	 16	74.0	13.1	 16
192	 16	99.3	19.5	 16
193	 16	89.8	19.1	 16
194	 16	197.5	20.5	 16
195	 16	86.0	9.4	 16
196	 16	71.5	16.7	 16
197	 16	84.0	13.9	 16
198	 16	57.0	11.3	 16
199	 16	54.5	9.0	 20
200	 16	65.3	14.4	 16
201	 16	101.3	15.4	 16
202	 16	186.5	23.8	 16
203	 16	98.3	14.8	 16
204	 16	68.8	11.2	 16
205	 16	163.0	27.2	 16
206	 16	115.5	23.9	 16
207	 16	71.0	12.5	 16
208	 16	114.5	16.9	 16
209	 16	98.8	15.8	 16
210	 16	56.0	11.5	 16
211	 16	61.3	9.5	 16
212	 16	69.8	10.2	 16
213	 16	65.8	11.9	 16
214	 16	66.3	11.7	 16
215	 16	62.8	12.1	 16
216	 16	292.3	44.9	 16
217	 16	114.5	19.5	 16
218	 16	403.5	84.1	 16
219	 16	236.5	42.2	 16
220	 16	94.3	17.7	 16
221	 16	97.3	13.7	 16
222	 16	131.5	26.9	 16
223	 16	66.0	10.2	 16
224	 16	62.5	13.1	 16
225	 16	76.5	10.3	 16
226	 16	72.5	12.1	 16
227	 16	65.0	10.1	 16
228	 16	71.5	11.5	 16
229	 16	527.5	65.6	 16
230	 16	77.3	13.0	 16
231	 16	64.5	11.6	 16
232	 16	54.3	10.7	 16
233	 16	56.0	9.1	 16
234	 16	147.5	26.2	 16
235	 16	384.0	45.9	 16
236	 16	512.5	57.2	 16
237	 16	177.0	24.0	 16
238	 16	85.3	16.9	 16
239	 16	130.5	20.4	 16
240	 16	93.8	17.8	 16
241	 16	88.8	15.5	 16
242	 16	167.3	25.8	 16
243	 16	64.5	10.5	 16
244	 16	59.3	10.1	 16
245	 16	87.0	19.7	 16
246	 16	75.5	11.0	 16
247	 16	82.3	18.1	 16
248	 16	67.5	14.0	 16
249	 16	355.0	51.0	 16
250	 16	61.3	10.4	 16
251	 16	71.5	10.8	 16
252	 16	72.3	15.1	 16
253	 16	100.5	33.6	 16
254	 16	1188.8	138.5	 16
255	 16	206.3	22.2	 16
256	 16	101.0	15.2	 16
257	 16	160.3	14.2	 16
258	 16	58.3	10.4	 16
259	 16	63.0	9.7	 16
260	 16	62.3	10.9	 16
261	 16	87.5	13.6	 16
262	 16	121.0	23.8	 16
263	 16	90.3	18.0	 16
264	 16	173.8	17.9	 16
265	 16	88.5	13.9	 16
266	 16	62.3	14.8	 16
267	 16	89.5	13.2	 16
268	 16	130.8	19.2	 16
269	 16	95.0	16.4	 16
270	 16	64.0	11.8	 16
271	 16	80.3	16.8	 16
272	 16	110.5	15.2	 16
273	 16	68.3	12.2	 16
274	 16	176.5	38.4	 16
275	 16	186.8	23.1	 16
276	 16	125.3	20.8	 16
277	 16	68.8	15.2	 16
278	 16	62.5	11.5	 16
279	 16	82.5	11.1	 16
280	 16	253.3	39.0	 16
281	 16	91.3	15.6	 16
282	 16	121.3	22.9	 16
283	 16	53.3	8.7	 16
284	 16	59.0	11.2	 16
285	 16	97.3	15.5	 16
286	 16	95.5	17.0	 16
287	 16	150.5	21.6	 16
288	 16	555.8	64.7	 16
289	 16	86.0	16.2	 16
290	 16	96.3	19.8	 16
291	 16	84.5	12.3	 16
292	 16	1162.0	140.4	 16
293	 16	196.5	23.8	 16
294	 16	84.8	10.4	 16
295	 16	75.3	16.0	 16
296	 16	85.5	16.3	 16
297	 16	555.5	55.7	 16
298	 16	92.3	19.0	 16
299	 16	96.3	14.4	 16
300	 16	59.5	11.4	 16
301	 16	83.8	16.6	 16
302	 16	59.0	13.7	 16
303	 16	60.3	14.8	 16
304	 16	111.3	22.8	 16
305	 16	56.8	8.5	 16
306	 16	105.3	17.4	 16
307	 16	100.0	16.3	 16
308	 16	117.3	17.0	 16
309	 16	92.0	20.8	 16
310	 16	826.3	86.0	 16
311	 16	218.5	28.0	 16
312	 16	126.3	19.5	 16
313	 16	72.5	14.9	 16
314	 16	65.8	11.5	 16
315	 16	80.3	10.7	 16
316	 16	454.3	46.8	 16
317	 16	194.8	30.7	 16
318	 16	114.8	21.0	 20
319	 16	191.5	40.1	 16
320	 16	108.5	22.1	 16
321	 16	165.5	21.4	 16
322	 16	158.0	38.1	 16
323	 16	71.5	12.5	 16
324	 16	159.5	32.1	 16
325	 16	234.3	49.7	 16
326	 16	102.3	12.7	 16
327	 16	109.8	25.4	 16
328	 16	70.5	15.4	 16
329	 16	53.5	18.3	 16
330	 16	164.8	38.3	 16
331	 16	67.0	9.6	 16
332	 16	151.3	25.0	 16
333	 16	335.0	84.7	 16
334	 16	61.8	18.4	 16
335	 16	58.3	14.2	 16
336	 16	70.0	13.8	 16
337	 16	195.0	33.5	 16
338	 16	128.3	17.7	 16
339	 16	144.5	22.6	 16
340	 16	76.3	11.2	 16
341	 16	69.0	12.2	 16
342	 16	88.5	18.3	 16
343	 16	54.3	8.2	 16
344	 16	62.3	11.3	 16
345	 16	66.3	9.9	 16
346	 16	111.5	22.6	 16
347	 16	59.5	13.9	 16
348	 16	82.0	13.7	 16
349	 16	67.3	16.0	 16
350	 16	104.0	21.2	 16
351	 16	114.8	20.2	 16
352	 16	59.3	7.8	 16
353	 16	91.3	12.8	 16
354	 16	53.3	9.8	 16
355	 16	83.0	12.3	 16
356	 16	324.8	39.4	 16
357	 16	138.5	26.3	 16
358	 16	114.5	23.3	 16
359	 16	159.8	26.6	 16
360	 16	51.0	13.0	 16
361	 16	79.3	15.1	 16
362	 16	86.3	11.4	 16
363	 16	55.3	7.6	 16
364	 16	78.0	19.4	 16
365	 16	53.3	9.6	 16
366	 16	129.5	31.8	 16
367	 16	148.0	33.4	 16
368	 16	53.0	9.6	 16
369	 16	61.8	12.7	 16
370	 16	56.8	14.7	 16
371	 16	65.5	12.1	 16
372	 16	113.8	21.8	 16
373	 16	103.0	13.9	 16
374	 16	61.0	7.3	 16
375	 16	275.5	28.6	 16
376	 16	104.5	10.0	 16
377	 16	83.3	11.1	 16
378	 16	78.3	12.2	 16
379	 16	197.0	28.2	 16
380	 16	67.5	13.0	 16
381	 16	55.5	11.1	 16
382	 16	54.8	11.6	 16
383	 16	62.3	10.6	 16
384	 16	63.5	12.2	 16
385	 16	181.3	24.4	 16
386	 16	140.0	25.2	 16
387	 16	273.3	29.7	 16
388	 16	313.5	45.1	 16
389	 16	139.5	23.9	 16
390	 16	78.3	16.0	 16
391	 16	64.0	6.5	 16
392	 16	86.3	15.0	 16
393	 16	176.3	31.1	 16
394	 16	192.3	25.9	 16
395	 16	91.5	13.6	 16
396	 16	71.0	10.5	 16
397	 16	64.0	7.2	 16
398	 16	54.5	8.0	 16
399	 16	61.8	7.5	 16
400	 16	128.0	25.0	 16
401	 16	82.8	14.7	 16
402	 16	135.0	15.4	 16
403	 16	111.3	17.7	 16
404	 16	363.0	41.4	 16
405	 16	423.3	45.7	 16
406	 16	93.3	16.9	 16
407	 16	164.5	28.8	 16
408	 16	145.5	23.8	 16
409	 16	72.0	13.5	 16
410	 16	97.0	13.5	 16
411	 16	55.5	11.4	 16
412	 16	57.3	9.4	 16
413	 16	86.3	20.1	 16
414	 16	77.3	15.5	 16
415	 16	94.0	20.9	 16
416	 16	168.3	23.5	 16
417	 16	211.3	36.3	 16
418	 16	107.8	20.7	 16
419	 16	112.8	23.0	 16
420	 16	64.0	10.6	 16
421	 16	59.3	15.6	 16
422	 16	52.0	9.4	 16
423	 16	135.0	20.6	 16
424	 16	71.8	12.6	 16
425	 16	61.3	11.6	 16
426	 16	62.3	10.6	 16
427	 16	141.3	16.4	 16
428	 16	51.5	9.1	 16
429	 16	63.3	12.1	 16
430	 16	61.8	12.0	 16
431	 16	3986.5	220.3	 16
432	 16	70.3	10.3	 16
433	 16	57.8	12.6	 16
434	 16	304.5	45.4	 16
435	 16	145.0	22.3	 16
436	 16	85.8	13.7	 16
437	 16	247.5	70.4	 20
438	 16	259.0	34.4	 16
439	 16	171.8	26.7	 16
440	 16	2153.8	632.8	 16
441	 16	353.3	82.1	 16
442	 16	68.3	12.7	 16
443	 16	72.5	14.6	 16
444	 16	178.0	70.6	 16
445	 16	427.0	135.1	 16
446	 16	177.5	19.1	 16
447	 16	175.0	25.8	 16
448	 16	158.5	26.5	 16
449	 16	144.0	23.0	 16
450	 16	126.0	25.9	 16
451	 16	537.3	148.1	 16
452	 16	136.3	20.2	 16
453	 16	196.3	21.9	 16
454	 16	192.3	34.6	 16
455	 16	59.8	12.8	 16
456	 16	50.3	8.5	 16
457	 16	102.3	17.0	 16
458	 16	244.3	44.4	 16
459	 16	94.0	21.5	 16
460	 16	96.3	12.1	 16
461	 16	121.0	17.2	 16
462	 16	67.8	13.0	 16
463	 16	56.5	9.8	 16
464	 16	76.0	14.0	 16
465	 16	62.5	13.0	 16
466	 16	66.5	11.0	 16
467	 16	89.5	15.3	 16
468	 16	119.8	26.4	 16
469	 16	197.5	28.5	 16
470	 16	356.0	70.9	 16
471	 16	123.0	20.2	 16
472	 16	101.8	16.5	 16
473	 16	84.0	18.8	 16
474	 16	97.0	16.8	 16
475	 16	182.5	26.4	 16
476	 16	49.5	10.0	 16
477	 16	118.5	20.1	 16
478	 16	272.8	49.2	 16
479	 16	109.3	19.4	 16
480	 16	61.5	10.2	 16
481	 16	104.5	15.3	 16
482	 16	62.0	12.7	 16
483	 16	53.0	12.0	 16
484	 16	95.5	14.9	 16
485	 16	47.0	7.1	 16
486	 16	91.5	16.1	 16
487	 16	78.0	20.1	 16
488	 16	63.0	11.0	 16
489	 16	76.8	11.5	 16
490	 16	87.5	19.6	 16
491	 16	59.3	8.5	 16
492	 16	137.3	25.6	 16
493	 16	173.0	20.2	 16
494	 16	61.3	11.2	 16
495	 16	68.0	12.4	 16
496	 16	65.8	9.9	 16
497	 16	62.3	33.1	 16
498	 16	58.5	8.5	 16
499	 16	57.0	6.8	 16
500	 16	54.5	8.7	 16
501	 16	249.0	47.7	 16
502	 16	70.0	14.1	 16
503	 16	180.5	35.2	 16
504	 16	56.0	8.5	 16
505	 16	101.5	17.1	 16
506	 16	65.8	10.9	 16
507	 16	131.5	24.3	 16
508	 16	105.8	14.9	 16
509	 16	126.0	16.6	 16
510	 16	92.5	14.2	 16
511	 16	75.3	15.8	 16
512	 16	67.5	12.8	 16
513	 16	71.3	19.9	 16
514	 16	80.8	12.6	 16
515	 16	72.5	13.6	 16
516	 16	86.0	16.5	 16
517	 16	56.0	11.3	 16
518	 16	64.0	13.1	 16
519	 16	58.8	15.9	 16
520	 16	63.3	12.7	 16
521	 16	59.8	10.7	 16
522	 16	93.5	12.6	 16
523	 16	91.5	14.0	 16
524	 16	47.0	12.1	 12
525	 16	143.0	22.9	 16
526	 16	75.3	14.7	 16
527	 16	162.8	25.4	 16
528	 16	79.3	11.3	 16
529	 16	48.3	7.4	 16
530	 16	193.8	37.2	 16
531	 16	374.0	44.1	 16
532	 16	50.5	10.0	 16
533	 16	55.8	13.5	 16
534	 16	73.8	13.6	 16
535	 16	169.3	22.9	 16
536	 16	74.3	15.0	 16
537	 16	164.8	28.8	 16
538	 16	331.0	42.2	 16
539	 16	111.0	17.4	 16
540	 16	525.5	58.1	 16
541	 16	57.0	12.9	 16
542	 16	58.3	9.4	 16
543	 16	71.0	12.4	 16
544	 16	178.5	20.9	 16
545	 16	133.5	25.5	 16
546	 16	55.8	10.7	 16
547	 16	191.0	32.9	 16
548	 16	103.3	13.7	 16
549	 16	55.5	13.5	 16
550	 16	62.3	8.2	 16
551	 16	60.3	7.2	 16
552	 16	75.5	13.2	 16
553	 16	122.0	19.5	 16
554	 16	403.8	42.6	 16
555	 16	113.0	18.7	 20
556	 16	572.8	118.0	 16
557	 16	174.0	19.7	 16
558	 16	67.5	14.0	 16
559	 16	89.3	10.7	 16
560	 16	51.0	7.6	 16
561	 16	79.5	14.2	 16
562	 16	116.3	16.5	 16
563	 16	80.5	17.7	 16
564	 16	69.8	13.9	 16
565	 16	84.5	15.4	 16
566	 16	55.5	10.3	 16
567	 16	229.5	29.5	 16
568	 16	140.0	15.5	 16
569	 16	174.0	19.5	 16
570	 16	185.3	29.7	 16
571	 16	84.3	12.7	 16
572	 16	97.3	13.1	 16
573	 16	105.8	23.6	 16
574	 16	54.0	10.0	 16
575	 16	74.3	15.7	 16
576	 16	101.5	20.7	 16
577	 16	320.0	42.1	 16
578	 16	79.5	12.0	 16
579	 16	80.5	17.1	 16
580	 16	261.3	34.0	 16
581	 16	86.5	12.9	 16
582	 16	73.3	13.0	 16
583	 16	100.0	22.0	 16
584	 16	91.3	13.8	 16
585	 16	132.3	21.5	 16
586	 16	196.8	23.5	 16
587	 16	118.3	18.5	 16
588	 16	113.8	19.5	 16
589	 16	49.5	8.3	 16
590	 16	66.0	11.8	 16
591	 16	75.0	14.5	 16
592	 16	102.3	20.8	 16
593	 16	159.3	20.2	 16
594	 16	124.8	21.9	 16
595	 16	262.3	24.5	 16
596	 16	119.8	19.5	 16
597	 16	118.0	21.2	 16
598	 16	75.8	18.3	 16
599	 16	149.8	24.6	 16
600	 16	210.8	31.1	 16
601	 16	149.5	22.0	 16
602	 16	138.8	21.0	 16
603	 16	54.5	8.3	 16
604	 16	74.3	13.1	 16
605	 16	163.8	22.4	 16
606	 16	82.0	14.6	 16
607	 16	136.3	25.8	 16
608	 16	108.3	23.9	 16
609	 16	96.0	17.1	 16
610	 16	59.5	8.3	 16
611	 16	69.8	16.3	 16
612	 16	68.8	17.2	 16
613	 16	95.3	13.6	 16
614	 16	91.3	13.0	 16
615	 16	68.0	12.9	 16
616	 16	86.5	14.1	 16
617	 16	330.3	42.2	 16
618	 16	64.8	11.6	 16
619	 16	179.0	25.4	 16
620	 16	210.3	35.9	 16
621	 16	75.0	12.6	 16
622	 16	853.3	72.5	 16
623	 16	719.5	56.3	 16
624	 16	68.0	11.5	 16
625	 16	311.8	29.5	 16
626	 16	90.3	14.5	 16
627	 16	89.0	17.3	 16
628	 16	161.3	24.9	 16
629	 16	106.0	15.7	 16
630	 16	251.5	40.1	 16
631	 16	183.0	27.4	 16
632	 16	108.0	25.2	 16
633	 16	299.0	26.2	 16
634	 16	278.3	38.2	 16
635	 16	298.5	34.1	 16
636	 16	142.5	17.8	 16
637	 16	92.5	20.1	 16
638	 16	269.8	39.0	 16
639	 16	103.3	15.4	 16
640	 16	121.3	22.7	 16
641	 16	339.3	26.7	 16
642	 16	213.3	31.1	 16
643	 16	87.3	14.1	 16
644	 16	205.5	30.0	 16
645	 16	74.3	12.4	 16
646	 16	105.0	21.2	 16
647	 16	90.5	16.4	 16
648	 16	170.0	22.7	 16
649	 16	97.5	13.5	 16
650	 16	68.3	11.4	 16
651	 16	58.3	10.9	 16
652	 16	67.8	13.9	 16
653	 16	167.0	24.4	 16
654	 16	68.3	12.3	 16
655	 16	52.0	10.4	 16
656	 16	752.0	137.7	 16
657	 16	92.5	18.7	 16
658	 16	77.8	14.2	 16
659	 16	68.3	13.4	 16
660	 16	169.5	31.3	 16
661	 16	94.5	17.6	 16
662	 16	1699.8	296.7	 16
663	 16	98.0	15.5	 16
664	 16	123.5	19.7	 16
665	 16	262.0	38.1	 16
666	 16	72.0	18.3	 16
667	 16	61.3	13.2	 16
668	 16	58.8	8.1	 16
669	 16	58.5	14.2	 16
670	 16	73.3	19.9	 16
671	 16	153.5	18.0	 16
672	 16	85.3	19.5	 16
673	 16	82.5	17.1	 16
674	 16	144.3	24.7	 20
675	 16	1205.3	262.4	 16
676	 16	101.3	19.0	 16
677	 16	66.3	10.3	 16
678	 16	138.3	29.3	 16
679	 16	86.3	15.7	 16
680	 16	66.0	11.0	 16
681	 16	64.3	14.2	 16
682	 16	58.0	11.0	 16
683	 16	144.3	27.9	 16
684	 16	80.5	12.0	 16
685	 16	95.5	13.8	 16
686	 16	157.0	31.6	 16
687	 16	160.8	33.2	 16
688	 16	75.0	9.1	 16
689	 16	56.3	11.8	 16
690	 16	139.3	25.3	 16
691	 16	97.5	16.4	 16
692	 16	1406.5	333.9	 16
693	 16	69.3	13.3	 16
694	 16	176.3	28.8	 16
695	 16	61.3	11.8	 16
696	 16	89.5	15.7	 16
697	 16	117.0	20.9	 16
698	 16	97.5	14.1	 16
699	 16	62.0	13.6	 16
700	 16	93.3	22.7	 16
701	 16	180.0	29.9	 16
702	 16	660.3	100.8	 16
703	 16	103.5	17.3	 16
704	 16	551.0	64.8	 16
705	 16	491.0	57.3	 16
706	 16	150.5	26.5	 16
707	 16	130.5	25.1	 16
708	 16	226.5	29.6	 16
709	 16	69.0	9.7	 16
710	 16	465.8	53.9	 16
711	 16	6808.0	947.8	 16
  0	 17	96.8	14.8	 16
  1	 17	106.0	15.8	 16
  2	 17	81.3	16.4	 16
  3	 17	1880.5	92.9	 16
  4	 17	227.3	29.2	 16
  5	 17	220.3	24.9	 16
  6	 17	542.3	75.7	 16
  7	 17	76.0	8.9	 16
  8	 17	591.5	67.8	 16
  9	 17	383.3	61.6	 16
 10	 17	65.5	14.3	 16
 11	 17	59.0	9.7	 16
 12	 17	132.5	28.1	 16
 13	 17	64.5	12.5	 16
 14	 17	130.5	18.5	 16
 15	 17	93.3	14.7	 16
 16	 17	202.3	32.9	 16
 17	 17	115.3	15.4	 16
 18	 17	2209.3	310.9	 16
 19	 17	112.8	21.1	 16
 20	 17	190.0	31.4	 16
 21	 17	100.0	16.5	 16
 22	 17	107.5	12.8	 16
 23	 17	53.3	10.4	 16
 24	 17	231.8	28.4	 16
 25	 17	83.0	15.1	 16
 26	 17	84.3	11.8	 16
 27	 17	49.8	11.3	 16
 28	 17	676.5	148.2	 16
 29	 17	63.3	11.9	 16
 30	 17	66.5	15.4	 16
 31	 17	66.8	17.3	 16
 32	 17	57.0	8.2	 16
 33	 17	61.5	10.9	 16
 34	 17	256.0	35.3	 16
 35	 17	334.8	65.8	 16
 36	 17	66.3	12.6	 16
 37	 17	158.5	25.2	 16
 38	 17	80.8	16.5	 16
 39	 17	546.0	92.3	 16
 40	 17	57.3	9.3	 16
 41	 17	66.8	11.7	 16
 42	 17	63.8	10.4	 16
 43	 17	95.5	19.0	 16
 44	 17	407.8	52.7	 16
 45	 17	406.5	41.0	 16
 46	 17	187.5	32.2	 16
 47	 17	401.0	71.0	 16
 48	 17	101.8	25.1	 16
 49	 17	131.5	22.4	 16
 50	 17	172.0	27.6	 16
 51	 17	149.3	15.2	 16
 52	 17	128.8	20.8	 16
 53	 17	58.3	8.8	 16
 54	 17	69.5	19.2	 16
 55	 17	70.3	16.2	 16
 56	 17	1778.0	301.2	 16
 57	 17	359.0	63.3	 16
 58	 17	76.3	15.8	 16
 59	 17	153.3	32.0	 16
 60	 17	134.3	16.9	 16
 61	 17	266.0	38.3	 16
 62	 17	129.3	16.9	 16
 63	 17	3193.0	521.3	 16
 64	 17	171.5	19.6	 16
 65	 17	154.3	26.8	 16
 66	 17	67.3	9.4	 16
 67	 17	313.5	37.9	 16
 68	 17	321.3	37.9	 16
 69	 17	638.5	53.9	 16
 70	 17	619.8	42.3	 16
 71	 17	743.3	69.0	 16
 72	 17	206.8	27.5	 16
 73	 17	72.8	10.3	 16
 74	 17	337.8	53.6	 16
 75	 17	194.3	27.1	 16
 76	 17	401.5	33.7	 16
 77	 17	1656.5	181.5	 16
 78	 17	1279.0	118.3	 16
 79	 17	108.0	18.5	 16
 80	 17	123.3	29.6	 16
 81	 17	65.5	15.7	 16
 82	 17	73.5	9.3	 20
 83	 17	462.0	132.8	 16
 84	 17	54.8	8.2	 16
 85	 17	69.0	13.0	 16
 86	 17	69.5	9.9	 16
 87	 17	111.8	14.4	 16
 88	 17	1411.8	303.0	 16
 89	 17	1914.8	476.0	 16
 90	 17	242.0	55.8	 16
 91	 17	450.5	50.2	 16
 92	 17	186.3	19.6	 16
 93	 17	196.0	27.3	 16
 94	 17	61.3	9.9	 16
 95	 17	165.0	20.7	 16
 96	 17	674.8	117.2	 16
 97	 17	3607.8	608.7	 16
 98	 17	175.5	31.0	 16
 99	 17	1300.0	225.2	 16
100	 17	1606.5	205.4	 16
101	 17	261.5	42.4	 16
102	 17	93.0	12.5	 16
103	 17	81.0	16.4	 16
104	 17	66.5	12.5	 16
105	 17	454.8	68.0	 16
106	 17	60.0	10.0	 16
107	 17	53.8	8.9	 16
108	 17	126.5	24.7	 16
109	 17	146.3	22.2	 16
110	 17	652.5	110.6	 16
111	 17	245.3	41.0	 16
112	 17	164.0	18.8	 16
113	 17	745.5	148.0	 16
114	 17	119.3	23.0	 16
115	 17	410.5	61.5	 16
116	 17	176.8	23.7	 16
117	 17	175.0	31.8	 16
118	 17	208.5	38.8	 16
119	 17	191.0	32.5	 16
120	 17	70.0	11.0	 16
121	 17	62.5	12.3	 16
122	 17	176.8	29.1	 16
123	 17	70.0	13.9	 16
124	 17	411.0	72.7	 16
125	 17	178.0	25.7	 16
126	 17	228.3	37.1	 16
127	 17	142.3	23.5	 16
128	 17	63.3	10.5	 16
129	 17	232.3	44.4	 16
130	 17	69.5	13.1	 16
131	 17	179.5	29.2	 16
132	 17	85.5	14.6	 16
133	 17	89.3	14.1	 16
134	 17	99.3	15.0	 16
135	 17	90.5	18.2	 16
136	 17	101.0	20.4	 16
137	 17	203.3	38.1	 16
138	 17	64.5	13.4	 16
139	 17	82.8	14.8	 16
140	 17	115.3	25.2	 16
141	 17	64.3	13.3	 16
142	 17	686.3	195.3	 16
143	 17	256.0	48.8	 16
144	 17	82.8	15.4	 16
145	 17	86.8	19.4	 16
146	 17	95.3	14.8	 16
147	 17	66.5	10.0	 16
148	 17	144.0	20.0	 16
149	 17	67.8	13.2	 16
150	 17	66.3	14.2	 16
151	 17	73.3	13.5	 16
152	 17	117.3	20.9	 16
153	 17	88.3	14.4	 16
154	 17	285.5	50.8	 16
155	 17	68.5	13.2	 16
156	 17	68.0	12.2	 16
157	 17	1381.8	177.6	 16
158	 17	121.5	20.9	 16
159	 17	395.8	44.2	 16
160	 17	178.0	20.9	 16
161	 17	194.0	24.8	 16
162	 17	174.3	24.8	 16
163	 17	84.5	11.6	 16
164	 17	116.8	22.4	 16
165	 17	62.0	10.8	 16
166	 17	78.3	18.0	 16
167	 17	86.8	17.6	 16
168	 17	414.3	52.8	 16
169	 17	413.0	45.3	 16
170	 17	1041.5	86.8	 16
171	 17	98.8	15.8	 16
172	 17	471.3	47.0	 16
173	 17	187.3	17.8	 16
174	 17	239.0	20.1	 16
175	 17	165.8	23.4	 16
176	 17	434.5	35.0	 16
177	 17	278.8	30.2	 16
178	 17	775.8	46.2	 16
179	 17	317.3	28.5	 16
180	 17	223.0	27.9	 16
181	 17	128.5	16.0	 16
182	 17	128.8	23.0	 16
183	 17	144.3	18.5	 16
184	 17	66.0	11.9	 16
185	 17	102.3	17.1	 16
186	 17	271.8	47.4	 16
187	 17	2256.3	342.9	 16
188	 17	60.3	7.2	 16
189	 17	126.0	23.3	 12
190	 17	99.0	17.7	 16
191	 17	196.5	24.5	 16
192	 17	79.0	13.4	 16
193	 17	265.8	32.0	 16
194	 17	3150.3	114.4	 16
195	 17	169.3	24.2	 16
196	 17	101.3	14.6	 16
197	 17	56.0	11.0	 16
198	 17	572.8	57.8	 16
199	 17	557.5	65.0	 16
200	 17	742.0	45.7	 16
201	 17	74.8	15.1	 20
202	 17	157.5	22.6	 16
203	 17	187.5	21.2	 16
204	 17	84.3	16.4	 16
205	 17	66.3	12.8	 16
206	 17	70.5	19.5	 16
207	 17	125.5	30.7	 16
208	 17	143.5	26.8	 16
209	 17	65.8	11.0	 16
210	 17	750.0	163.0	 16
211	 17	66.8	12.9	 16
212	 17	584.8	102.2	 16
213	 17	203.3	36.5	 16
214	 17	128.0	23.7	 16
215	 17	70.3	13.3	 16
216	 17	80.3	13.5	 16
217	 17	203.3	45.8	 16
218	 17	55.3	11.4	 16
219	 17	54.5	10.4	 16
220	 17	136.5	26.2	 16
221	 17	59.3	10.4	 16
222	 17	63.8	14.9	 16
223	 17	66.0	15.6	 16
224	 17	197.3	36.9	 16
225	 17	57.5	9.8	 16
226	 17	68.0	13.0	 16
227	 17	62.8	10.2	 16
228	 17	265.3	36.3	 16
229	 17	292.8	52.1	 16
230	 17	79.3	15.6	 16
231	 17	446.8	72.3	 16
232	 17	110.5	21.7	 16
233	 17	1276.5	221.2	 16
234	 17	421.8	38.0	 16
235	 17	150.0	22.7	 16
236	 17	67.3	15.3	 16
237	 17	127.8	25.6	 16
238	 17	65.5	19.2	 16
239	 17	199.3	29.2	 16
240	 17	70.5	15.5	 16
241	 17	542.3	82.0	 16
242	 17	182.3	31.5	 16
243	 17	406.0	56.2	 16
244	 17	89.3	13.8	 16
245	 17	798.5	158.0	 16
246	 17	156.8	29.8	 16
247	 17	91.8	22.2	 16
248	 17	73.5	13.4	 16
249	 17	127.3	18.6	 16
250	 17	451.5	35.3	 16
251	 17	493.0	78.3	 16
252	 17	155.5	24.7	 16
253	 17	706.0	151.1	 16
254	 17	181.5	16.0	 16
255	 17	64.3	10.9	 16
256	 17	139.3	13.7	 16
257	 17	110.8	18.7	 16
258	 17	296.8	40.0	 16
259	 17	244.3	43.5	 16
260	 17	223.8	33.6	 16
261	 17	513.5	60.6	 16
262	 17	122.0	23.7	 16
263	 17	71.8	14.9	 16
264	 17	85.8	15.6	 16
265	 17	102.3	22.1	 16
266	 17	116.0	18.0	 16
267	 17	71.0	12.3	 16
268	 17	243.5	44.5	 16
269	 17	447.8	55.3	 16
270	 17	251.8	37.4	 16
271	 17	339.0	41.9	 16
272	 17	342.8	53.4	 16
273	 17	248.3	46.9	 16
274	 17	72.0	15.4	 16
275	 17	814.8	106.4	 16
276	 17	138.3	18.4	 16
277	 17	334.5	42.9	 16
278	 17	168.8	18.8	 16
279	 17	128.0	24.5	 16
280	 17	68.0	11.7	 16
281	 17	73.3	20.3	 16
282	 17	111.0	16.0	 16
283	 17	54.0	11.5	 16
284	 17	73.0	13.7	 16
285	 17	58.3	7.9	 16
286	 17	72.3	14.6	 16
287	 17	105.0	17.7	 16
288	 17	103.5	13.6	 16
289	 17	83.0	22.8	 16
290	 17	181.5	32.6	 16
291	 17	75.8	14.8	 16
292	 17	124.5	23.8	 16
293	 17	96.5	18.0	 16
294	 17	52.0	8.6	 16
295	 17	81.3	11.0	 16
296	 17	62.5	14.7	 16
297	 17	57.0	10.8	 16
298	 17	107.3	18.8	 16
299	 17	74.3	12.8	 16
300	 17	413.3	45.2	 16
301	 17	171.3	37.6	 16
302	 17	557.3	79.8	 16
303	 17	247.0	32.6	 16
304	 17	85.8	19.5	 16
305	 17	307.8	42.0	 16
306	 17	236.5	26.0	 16
307	 17	8157.0	441.9	 16
308	 17	8523.5	516.2	 16
309	 17	8324.5	1265.0	 16
310	 17	139.0	12.5	 16
311	 17	77.5	13.0	 16
312	 17	124.3	19.4	 16
313	 17	282.8	46.2	 16
314	 17	168.3	20.2	 16
315	 17	139.3	41.6	 16
316	 17	601.8	46.9	 16
317	 17	88.5	20.5	 16
318	 17	236.8	28.4	 16
319	 17	55.8	12.7	 16
320	 17	171.3	46.8	 20
321	 17	88.0	22.5	 16
322	 17	253.0	79.9	 16
323	 17	78.8	15.1	 16
324	 17	71.5	11.9	 16
325	 17	59.3	9.5	 16
326	 17	74.0	11.9	 16
327	 17	217.5	68.9	 16
328	 17	47.8	7.2	 16
329	 17	69.3	9.4	 16
330	 17	608.3	170.6	 16
331	 17	164.8	36.4	 16
332	 17	593.5	178.0	 16
333	 17	345.3	88.7	 16
334	 17	70.0	11.6	 16
335	 17	992.8	218.3	 16
336	 17	280.5	71.9	 16
337	 17	348.0	77.9	 16
338	 17	291.8	49.0	 16
339	 17	2824.0	681.3	 16
340	 17	85.5	14.4	 16
341	 17	62.5	12.1	 16
342	 17	453.3	82.5	 16
343	 17	99.3	18.5	 16
344	 17	241.8	19.2	 16
345	 17	256.5	23.3	 16
346	 17	236.5	20.7	 16
347	 17	103.8	11.9	 16
348	 17	244.5	35.3	 16
349	 17	74.3	15.1	 16
350	 17	65.8	11.8	 16
351	 17	121.8	16.3	 16
352	 17	1871.8	199.9	 16
353	 17	60.5	11.1	 16
354	 17	118.3	17.9	 16
355	 17	107.3	11.4	 16
356	 17	284.0	52.5	 16
357	 17	112.5	19.1	 16
358	 17	95.8	16.3	 16
359	 17	71.0	16.6	 16
360	 17	80.0	12.2	 16
361	 17	527.8	79.2	 16
362	 17	161.8	30.6	 16
363	 17	114.8	24.4	 16
364	 17	131.5	26.5	 16
365	 17	842.8	127.3	 16
366	 17	176.5	26.1	 16
367	 17	75.0	13.3	 16
368	 17	68.3	10.8	 16
369	 17	819.5	93.2	 16
370	 17	102.3	14.1	 16
371	 17	57.8	13.0	 16
372	 17	94.8	17.4	 16
373	 17	87.8	14.9	 16
374	 17	66.3	11.8	 16
375	 17	96.5	28.7	 16
376	 17	484.0	73.0	 16
377	 17	158.0	25.4	 16
378	 17	141.0	22.9	 16
379	 17	61.5	13.8	 16
380	 17	71.3	10.9	 16
381	 17	106.5	16.0	 16
382	 17	61.8	10.7	 16
383	 17	152.3	26.0	 16
384	 17	128.0	26.8	 16
385	 17	358.0	31.4	 16
386	 17	147.5	25.8	 16
387	 17	380.8	45.9	 16
388	 17	52.5	9.1	 16
389	 17	132.5	31.5	 16
390	 17	63.3	11.9	 16
391	 17	133.3	15.6	 16
392	 17	150.0	28.4	 16
393	 17	84.3	10.4	 16
394	 17	141.5	25.8	 16
395	 17	265.3	30.0	 16
396	 17	109.8	17.2	 16
397	 17	54.8	9.9	 16
398	 17	86.5	14.4	 16
399	 17	179.3	24.8	 16
400	 17	103.0	18.1	 16
401	 17	89.8	17.5	 16
402	 17	159.3	17.5	 16
403	 17	216.5	23.5	 16
404	 17	128.5	34.4	 16
405	 17	74.0	12.4	 16
406	 17	106.0	17.6	 16
407	 17	634.3	69.7	 16
408	 17	53.0	9.5	 16
409	 17	65.8	14.1	 16
410	 17	55.0	10.7	 16
411	 17	92.0	13.0	 16
412	 17	121.3	12.7	 16
413	 17	83.3	15.1	 16
414	 17	147.5	17.7	 16
415	 17	113.0	17.1	 16
416	 17	58.0	12.1	 16
417	 17	145.0	26.3	 16
418	 17	573.3	80.3	 16
419	 17	61.5	8.7	 16
420	 17	777.0	83.4	 16
421	 17	75.3	12.0	 16
422	 17	75.0	12.0	 16
423	 17	142.3	23.5	 16
424	 17	117.3	21.8	 16
425	 17	124.0	21.1	 16
426	 17	425.8	42.6	 16
427	 17	221.3	29.1	 16
428	 17	57.3	11.1	 16
429	 17	52.0	10.6	 16
430	 17	560.5	68.6	 16
431	 17	211.0	25.0	 16
432	 17	339.3	41.1	 16
433	 17	61.5	12.1	 16
434	 17	311.5	60.5	 16
435	 17	75.3	12.5	 16
436	 17	143.3	28.8	 16
437	 17	166.3	18.7	 16
438	 17	185.0	39.0	 20
439	 17	49.3	10.8	 16
440	 17	415.5	103.2	 16
441	 17	410.8	118.8	 16
442	 17	211.5	40.3	 16
443	 17	237.8	32.2	 16
444	 17	281.0	70.4	 16
445	 17	92.8	11.7	 16
446	 17	100.0	17.3	 16
447	 17	154.8	37.7	 16
448	 17	89.3	16.3	 16
449	 17	57.8	9.2	 16
450	 17	70.8	12.8	 16
451	 17	76.3	13.8	 16
452	 17	269.0	49.4	 16
453	 17	98.0	31.2	 16
454	 17	92.3	15.7	 16
455	 17	149.0	27.2	 16
456	 17	229.0	49.8	 16
457	 17	77.0	10.7	 16
458	 17	57.0	13.1	 16
459	 17	107.3	16.0	 16
460	 17	426.3	94.6	 16
461	 17	67.5	16.9	 16
462	 17	160.3	26.5	 16
463	 17	126.3	22.7	 16
464	 17	1542.5	333.2	 16
465	 17	779.3	164.0	 16
466	 17	59.3	11.2	 16
467	 17	141.5	31.9	 16
468	 17	96.3	15.8	 16
469	 17	123.8	15.3	 16
470	 17	147.3	23.8	 16
471	 17	64.0	13.4	 16
472	 17	117.3	22.0	 16
473	 17	59.0	10.5	 16
474	 17	157.8	23.9	 16
475	 17	262.0	31.1	 16
476	 17	96.3	19.4	 16
477	 17	66.3	10.7	 16
478	 17	279.3	43.2	 16
479	 17	708.3	102.1	 16
480	 17	150.5	33.9	 16
481	 17	80.0	15.4	 16
482	 17	556.0	89.1	 16
483	 17	646.5	143.7	 16
484	 17	100.5	12.5	 16
485	 17	232.8	31.7	 16
486	 17	72.3	11.9	 16
487	 17	228.5	45.1	 16
488	 17	79.3	14.1	 16
489	 17	78.3	18.9	 16
490	 17	55.3	8.7	 16
491	 17	136.0	25.7	 16
492	 17	65.8	12.7	 16
493	 17	127.5	15.5	 16
494	 17	908.3	167.5	 16
495	 17	390.3	41.5	 16
496	 17	187.0	34.9	 16
497	 17	323.5	48.4	 16
498	 17	174.8	33.0	 16
499	 17	65.0	13.7	 16
500	 17	98.3	17.7	 16
501	 17	613.8	139.0	 16
502	 17	109.5	20.2	 16
503	 17	195.8	27.7	 16
504	 17	85.5	10.4	 16
505	 17	58.5	6.5	 16
506	 17	64.8	9.4	 16
507	 17	60.0	11.0	 16
508	 17	52.8	8.6	 16
509	 17	67.8	13.7	 16
510	 17	200.0	32.6	 16
511	 17	245.3	34.0	 16
512	 17	65.0	9.5	 16
513	 17	76.8	18.3	 16
514	 17	60.0	10.5	 16
515	 17	538.5	89.0	 16
516	 17	137.5	22.1	 16
517	 17	140.0	20.0	 16
518	 17	297.5	47.4	 16
519	 17	86.5	16.6	 16
520	 17	100.0	21.4	 16
521	 17	150.3	21.6	 16
522	 17	85.5	15.9	 16
523	 17	290.8	38.2	 16
524	 17	111.5	30.7	 16
525	 17	93.0	10.9	 16
526	 17	587.0	66.5	 16
527	 17	104.0	24.6	 16
528	 17	166.0	33.7	 16
529	 17	125.0	23.1	 16
530	 17	236.5	34.7	 16
531	 17	330.0	53.2	 16
532	 17	54.5	10.6	 16
533	 17	99.5	18.3	 16
534	 17	437.0	55.5	 16
535	 17	53.8	7.6	 16
536	 17	67.3	11.7	 16
537	 17	61.0	12.0	 16
538	 17	59.3	9.2	 16
539	 17	63.3	12.4	 16
540	 17	121.0	13.3	 16
541	 17	163.8	21.9	 16
542	 17	219.5	19.5	 16
543	 17	159.5	22.1	 16
544	 17	161.0	29.5	 16
545	 17	120.5	19.3	 16
546	 17	83.0	10.5	 16
547	 17	84.0	8.6	 16
548	 17	115.3	17.6	 16
549	 17	116.3	16.7	 16
550	 17	233.3	23.7	 16
551	 17	282.3	35.3	 16
552	 17	1283.8	131.3	 16
553	 17	662.5	69.3	 16
554	 17	601.8	65.4	 16
555	 17	493.3	56.4	 16
556	 17	117.3	20.3	 16
557	 17	72.8	13.0	 20
558	 17	237.3	79.0	 16
559	 17	1337.5	256.0	 16
560	 17	89.8	13.2	 16
561	 17	62.0	11.4	 16
562	 17	111.5	17.6	 16
563	 17	168.8	23.9	 16
564	 17	3666.5	689.9	 16
565	 17	137.5	13.3	 16
566	 17	87.0	19.5	 16
567	 17	143.3	23.7	 16
568	 17	136.3	22.1	 16
569	 17	836.8	161.5	 16
570	 17	62.3	13.0	 16
571	 17	77.3	15.6	 16
572	 17	63.8	13.4	 16
573	 17	190.5	13.6	 16
574	 17	102.3	22.4	 16
575	 17	527.0	61.1	 16
576	 17	358.0	30.1	 16
577	 17	71.8	16.4	 16
578	 17	107.0	15.7	 16
579	 17	224.5	25.5	 16
580	 17	1649.0	112.2	 16
581	 17	240.8	28.6	 16
582	 17	284.0	37.1	 16
583	 17	92.8	17.0	 16
584	 17	2709.3	208.2	 16
585	 17	471.8	48.1	 16
586	 17	138.0	17.6	 16
587	 17	152.3	19.7	 16
588	 17	95.3	14.0	 16
589	 17	172.3	25.0	 16
590	 17	1243.8	131.8	 16
591	 17	105.3	22.9	 16
592	 17	80.3	15.2	 16
593	 17	1762.0	173.0	 16
594	 17	96.3	21.8	 16
595	 17	104.0	14.0	 16
596	 17	463.3	24.0	 16
597	 17	688.5	43.3	 16
598	 17	88.3	11.1	 16
599	 17	113.0	24.1	 16
600	 17	161.5	20.0	 16
601	 17	560.3	52.3	 16
602	 17	1671.8	182.0	 16
603	 17	142.3	19.8	 16
604	 17	428.8	60.5	 16
605	 17	177.0	26.5	 16
606	 17	184.0	27.5	 16
607	 17	111.8	18.6	 16
608	 17	191.8	26.1	 16
609	 17	126.5	18.8	 16
610	 17	196.3	38.2	 16
611	 17	213.3	22.1	 16
612	 17	63.0	11.1	 16
613	 17	56.3	9.5	 16
614	 17	69.5	11.8	 16
615	 17	938.0	114.4	 16
616	 17	126.5	18.1	 16
617	 17	192.0	27.6	 16
618	 17	755.8	77.0	 16
619	 17	643.8	59.4	 16
620	 17	147.5	22.8	 16
621	 17	271.3	56.2	 16
622	 17	398.0	39.0	 16
623	 17	534.5	53.0	 16
624	 17	352.0	31.3	 16
625	 17	191.5	28.6	 16
626	 17	74.5	11.6	 16
627	 17	192.3	38.3	 16
628	 17	141.8	19.0	 16
629	 17	155.8	14.4	 16
630	 17	122.0	21.6	 16
631	 17	71.5	12.0	 16
632	 17	69.5	12.5	 16
633	 17	307.0	28.5	 16
634	 17	407.3	47.5	 16
635	 17	363.8	49.7	 16
636	 17	65.3	15.8	 16
637	 17	64.0	12.0	 16
638	 17	149.3	25.4	 16
639	 17	1585.5	128.2	 16
640	 17	285.0	47.1	 16
641	 17	298.0	31.7	 16
642	 17	695.3	63.0	 16
643	 17	479.3	50.6	 16
644	 17	70.0	9.4	 16
645	 17	1392.5	158.1	 16
646	 17	371.8	44.0	 16
647	 17	169.0	26.4	 16
648	 17	189.5	19.8	 16
649	 17	196.3	23.4	 16
650	 17	113.5	21.5	 16
651	 17	95.3	20.0	 16
652	 17	100.0	11.7	 16
653	 17	164.0	20.3	 16
654	 17	276.8	43.0	 16
655	 17	92.3	19.7	 16
656	 17	52.5	12.4	 16
657	 17	104.3	18.0	 16
658	 17	75.5	14.1	 16
659	 17	625.5	52.6	 16
660	 17	146.3	25.5	 16
661	 17	228.5	28.2	 16
662	 17	178.3	24.1	 16
663	 17	122.0	19.1	 16
664	 17	60.8	12.7	 16
665	 17	63.3	13.0	 16
666	 17	454.0	40.2	 16
667	 17	363.0	42.0	 16
668	 17	59.3	10.7	 16
669	 17	66.3	8.6	 16
670	 17	116.0	14.2	 16
671	 17	2913.3	199.8	 16
672	 17	3361.3	166.7	 16
673	 17	70.3	13.6	 16
674	 17	478.0	43.3	 16
675	 17	447.0	56.4	 20
676	 17	226.3	32.9	 16
677	 17	383.5	48.9	 16
678	 17	108.8	13.7	 16
679	 17	163.8	28.1	 16
680	 17	215.3	28.2	 16
681	 17	127.5	20.2	 16
682	 17	86.3	14.3	 16
683	 17	103.3	20.8	 16
684	 17	191.0	18.4	 16
685	 17	294.5	43.4	 16
686	 17	138.0	36.3	 16
687	 17	263.5	33.9	 16
688	 17	540.3	100.0	 16
689	 17	63.0	17.7	 16
690	 17	103.0	19.8	 16
691	 17	155.5	23.3	 16
692	 17	190.3	19.5	 16
693	 17	205.0	42.0	 16
694	 17	494.8	86.9	 16
695	 17	94.3	16.1	 16
696	 17	168.8	24.3	 16
697	 17	194.0	24.6	 16
698	 17	388.8	58.0	 16
699	 17	82.0	13.9	 16
700	 17	94.0	23.8	 16
701	 17	180.0	18.6	 16
702	 17	294.8	34.9	 16
703	 17	557.3	75.1	 16
704	 17	174.3	27.0	 16
705	 17	129.0	21.7	 16
706	 17	119.8	22.2	 16
707	 17	166.0	21.1	 16
708	 17	78.5	11.3	 16
709	 17	192.8	28.7	 16
710	 17	147.0	20.7	 16
711	 17	99.0	13.7	 16
  0	 18	8773.0	1017.7	 16
  1	 18	82.5	14.4	 16
  2	 18	65.3	11.7	 16
  3	 18	329.0	48.7	 16
  4	 18	80.5	13.8	 16
  5	 18	173.0	26.7	 16
  6	 18	202.8	24.0	 16
  7	 18	88.3	14.6	 16
  8	 18	140.8	20.4	 16
  9	 18	87.8	15.8	 16
 10	 18	61.5	10.5	 16
 11	 18	58.5	11.7	 16
 12	 18	71.5	10.3	 16
 13	 18	78.0	14.7	 16
 14	 18	75.3	9.4	 16
 15	 18	64.3	10.3	 16
 16	 18	179.0	23.0	 16
 17	 18	87.0	14.8	 16
 18	 18	354.8	47.4	 16
 19	 18	125.3	16.2	 16
 20	 18	86.8	16.2	 16
 21	 18	98.5	23.4	 16
 22	 18	67.3	9.3	 16
 23	 18	56.5	7.6	 16
 24	 18	124.8	18.7	 16
 25	 18	59.3	9.5	 16
 26	 18	113.5	17.9	 16
 27	 18	66.5	13.9	 16
 28	 18	76.0	13.9	 16
 29	 18	61.8	13.5	 16
 30	 18	55.3	11.5	 16
 31	 18	71.0	11.5	 16
 32	 18	55.3	9.1	 16
 33	 18	57.5	11.2	 16
 34	 18	97.8	14.6	 16
 35	 18	203.8	39.3	 16
 36	 18	78.3	14.6	 16
 37	 18	86.3	13.3	 16
 38	 18	65.0	7.5	 16
 39	 18	116.0	18.3	 16
 40	 18	68.0	12.0	 16
 41	 18	63.3	8.4	 16
 42	 18	64.8	8.9	 16
 43	 18	64.5	10.3	 16
 44	 18	136.0	21.6	 16
 45	 18	252.3	33.5	 16
 46	 18	101.0	19.5	 16
 47	 18	104.0	21.2	 16
 48	 18	72.5	14.4	 16
 49	 18	75.3	20.9	 16
 50	 18	85.5	13.5	 16
 51	 18	116.0	15.8	 16
 52	 18	84.3	14.5	 16
 53	 18	67.8	15.2	 16
 54	 18	71.8	10.4	 16
 55	 18	62.0	11.1	 16
 56	 18	208.3	34.5	 16
 57	 18	75.5	14.9	 16
 58	 18	68.8	19.8	 16
 59	 18	68.5	11.2	 16
 60	 18	104.5	20.9	 16
 61	 18	106.8	17.9	 16
 62	 18	76.0	11.6	 16
 63	 18	560.3	105.5	 16
 64	 18	87.8	15.6	 16
 65	 18	61.8	7.7	 16
 66	 18	72.3	15.6	 16
 67	 18	84.5	11.0	 16
 68	 18	64.3	10.1	 16
 69	 18	343.5	35.7	 16
 70	 18	341.8	31.9	 16
 71	 18	209.3	30.6	 16
 72	 18	125.0	24.0	 16
 73	 18	77.8	13.6	 16
 74	 18	131.3	27.0	 16
 75	 18	74.3	14.7	 16
 76	 18	78.5	9.3	 16
 77	 18	176.3	28.5	 16
 78	 18	217.5	29.3	 16
 79	 18	130.0	21.1	 16
 80	 18	80.8	18.8	 16
 81	 18	63.8	14.1	 16
 82	 18	58.3	13.4	 16
 83	 18	75.3	14.0	 20
 84	 18	52.0	9.1	 16
 85	 18	60.3	7.6	 16
 86	 18	57.3	14.3	 16
 87	 18	88.0	18.5	 16
 88	 18	320.3	57.8	 16
 89	 18	343.3	58.0	 16
 90	 18	106.0	16.2	 16
 91	 18	265.8	79.3	 16
 92	 18	172.0	22.5	 16
 93	 18	190.8	24.2	 16
 94	 18	64.3	14.2	 16
 95	 18	120.5	14.4	 16
 96	 18	331.3	28.3	 16
 97	 18	415.5	70.3	 16
 98	 18	162.8	30.1	 16
 99	 18	206.0	26.7	 16
100	 18	237.3	29.3	 16
101	 18	141.5	19.2	 16
102	 18	105.3	11.0	 16
103	 18	77.0	14.3	 16
104	 18	73.5	13.3	 16
105	 18	144.5	19.3	 16
106	 18	55.0	10.7	 16
107	 18	64.0	13.3	 16
108	 18	88.8	21.0	 16
109	 18	96.8	13.8	 16
110	 18	128.8	20.8	 16
111	 18	210.0	20.6	 16
112	 18	245.8	44.9	 16
113	 18	82.0	15.9	 16
114	 18	70.0	17.5	 16
115	 18	236.0	30.4	 16
116	 18	170.5	18.8	 16
117	 18	146.0	21.8	 16
118	 18	104.0	15.3	 16
119	 18	127.3	25.1	 16
120	 18	76.0	13.2	 16
121	 18	60.3	10.1	 16
122	 18	60.8	14.2	 16
123	 18	83.3	14.4	 16
124	 18	145.0	25.2	 16
125	 18	117.0	22.6	 16
126	 18	218.0	35.9	 16
127	 18	94.8	23.4	 16
128	 18	65.5	10.5	 16
129	 18	75.3	13.3	 16
130	 18	65.3	12.2	 16
131	 18	155.3	28.3	 16
132	 18	65.3	9.4	 16
133	 18	72.3	10.6	 16
134	 18	65.3	9.6	 16
135	 18	89.5	20.3	 16
136	 18	82.3	14.8	 16
137	 18	81.8	18.8	 16
138	 18	71.3	14.9	 16
139	 18	55.5	9.5	 16
140	 18	73.0	15.6	 16
141	 18	64.0	13.0	 16
142	 18	116.5	20.6	 16
143	 18	68.8	6.4	 16
144	 18	64.5	11.5	 16
145	 18	52.3	13.2	 16
146	 18	66.3	12.9	 16
147	 18	70.3	17.7	 16
148	 18	76.5	14.7	 16
149	 18	75.3	13.0	 16
150	 18	68.5	11.4	 16
151	 18	71.5	14.4	 16
152	 18	104.0	17.5	 16
153	 18	105.5	32.1	 16
154	 18	84.5	25.5	 16
155	 18	64.0	13.7	 16
156	 18	67.0	11.4	 16
157	 18	268.5	42.7	 16
158	 18	75.5	9.9	 16
159	 18	132.0	27.3	 16
160	 18	197.8	28.4	 16
161	 18	102.5	10.8	 16
162	 18	120.0	25.6	 16
163	 18	80.0	13.9	 16
164	 18	92.5	17.2	 16
165	 18	70.5	10.5	 16
166	 18	75.3	11.7	 16
167	 18	76.8	10.4	 16
168	 18	93.5	19.8	 16
169	 18	89.0	12.1	 16
170	 18	238.5	31.5	 16
171	 18	69.3	15.3	 16
172	 18	385.8	37.7	 16
173	 18	146.8	17.7	 16
174	 18	118.5	22.8	 16
175	 18	207.3	25.8	 16
176	 18	563.8	43.1	 16
177	 18	379.0	48.4	 16
178	 18	877.3	55.9	 16
179	 18	405.3	40.9	 16
180	 18	110.3	15.7	 16
181	 18	111.0	21.5	 16
182	 18	177.5	26.5	 16
183	 18	139.0	30.7	 16
184	 18	77.3	13.5	 16
185	 18	63.3	8.3	 16
186	 18	90.0	14.3	 16
187	 18	111.8	21.3	 16
188	 18	55.3	11.0	 16
189	 18	102.0	21.7	 16
190	 18	57.3	9.7	 16
191	 18	93.3	16.6	 16
192	 18	79.8	17.0	 16
193	 18	200.8	36.3	 16
194	 18	1975.0	256.0	 16
195	 18	269.3	34.3	 16
196	 18	67.5	14.8	 16
197	 18	62.8	14.5	 16
198	 18	115.3	17.9	 16
199	 18	213.5	50.7	 16
200	 18	313.3	54.4	 16
201	 18	98.0	16.3	 16
202	 18	108.0	19.3	 20
203	 18	124.5	20.8	 16
204	 18	73.5	11.9	 16
205	 18	100.3	20.2	 16
206	 18	167.5	37.7	 16
207	 18	60.8	11.7	 16
208	 18	49.8	11.0	 16
209	 18	60.0	8.2	 16
210	 18	352.0	75.9	 16
211	 18	58.3	13.5	 16
212	 18	182.3	35.1	 16
213	 18	89.5	17.6	 16
214	 18	75.0	17.1	 16
215	 18	71.0	15.5	 16
216	 18	63.0	16.0	 16
217	 18	81.3	16.5	 16
218	 18	61.3	12.8	 16
219	 18	60.0	11.0	 16
220	 18	79.3	8.5	 16
221	 18	49.0	10.2	 16
222	 18	57.3	10.8	 16
223	 18	55.5	10.2	 16
224	 18	73.0	12.4	 16
225	 18	55.8	8.7	 16
226	 18	68.0	13.2	 16
227	 18	53.0	6.6	 16
228	 18	93.0	17.2	 16
229	 18	103.3	24.5	 16
230	 18	72.3	16.3	 16
231	 18	507.3	117.4	 16
232	 18	115.0	23.2	 16
233	 18	352.8	73.3	 16
234	 18	272.0	51.9	 16
235	 18	78.5	10.4	 16
236	 18	61.0	12.6	 16
237	 18	198.8	33.1	 16
238	 18	52.3	10.2	 16
239	 18	133.8	22.1	 16
240	 18	65.3	10.6	 16
241	 18	54.8	10.7	 16
242	 18	210.3	36.1	 16
243	 18	576.8	62.1	 16
244	 18	88.8	21.2	 16
245	 18	177.0	31.5	 16
246	 18	89.0	15.2	 16
247	 18	65.5	11.4	 16
248	 18	98.0	17.0	 16
249	 18	65.0	12.5	 16
250	 18	63.0	8.7	 16
251	 18	68.0	12.7	 16
252	 18	80.0	15.2	 16
253	 18	85.5	14.2	 16
254	 18	77.0	10.1	 16
255	 18	64.5	9.3	 16
256	 18	128.5	21.1	 16
257	 18	79.0	18.2	 16
258	 18	267.3	36.3	 16
259	 18	75.0	12.6	 16
260	 18	99.8	14.2	 16
261	 18	902.3	97.2	 16
262	 18	162.3	25.6	 16
263	 18	62.3	12.1	 16
264	 18	91.5	46.0	 16
265	 18	95.5	26.2	 16
266	 18	81.0	12.7	 16
267	 18	78.3	11.2	 16
268	 18	117.3	21.3	 16
269	 18	324.0	46.1	 16
270	 18	179.0	28.3	 16
271	 18	114.5	22.9	 16
272	 18	116.3	16.3	 16
273	 18	66.8	12.7	 16
274	 18	69.5	12.1	 16
275	 18	193.0	36.6	 16
276	 18	97.8	19.9	 16
277	 18	116.0	17.4	 16
278	 18	84.0	9.7	 16
279	 18	79.3	9.2	 16
280	 18	57.5	12.0	 16
281	 18	59.0	12.8	 16
282	 18	90.8	18.7	 16
283	 18	66.3	12.7	 16
284	 18	57.5	12.5	 16
285	 18	53.5	13.4	 16
286	 18	62.8	15.2	 16
287	 18	93.3	12.7	 16
288	 18	87.5	17.5	 16
289	 18	65.5	17.2	 16
290	 18	159.8	43.5	 16
291	 18	105.3	19.7	 16
292	 18	98.0	19.1	 16
293	 18	67.0	9.1	 16
294	 18	53.3	9.3	 16
295	 18	56.0	10.2	 16
296	 18	63.8	14.3	 16
297	 18	57.3	10.9	 16
298	 18	48.3	11.2	 16
299	 18	74.8	12.4	 16
300	 18	115.0	16.2	 16
301	 18	85.0	13.7	 16
302	 18	84.5	18.3	 16
303	 18	93.5	19.3	 16
304	 18	109.3	12.5	 16
305	 18	62.5	12.5	 16
306	 18	91.5	14.4	 16
307	 18	1212.5	82.2	 16
308	 18	1468.3	93.0	 16
309	 18	1458.3	255.9	 16
310	 18	80.8	13.5	 16
311	 18	69.0	12.3	 16
312	 18	108.5	12.9	 16
313	 18	186.3	30.0	 16
314	 18	116.3	22.7	 16
315	 18	184.0	39.9	 16
316	 18	524.5	89.9	 16
317	 18	75.8	15.0	 16
318	 18	66.3	10.0	 16
319	 18	56.3	7.4	 16
320	 18	70.3	13.2	 16
321	 18	80.8	20.2	 20
322	 18	91.5	14.3	 16
323	 18	72.8	14.8	 16
324	 18	55.0	7.9	 16
325	 18	59.5	14.0	 16
326	 18	74.3	27.4	 16
327	 18	70.0	13.3	 16
328	 18	66.5	14.4	 16
329	 18	66.0	20.8	 16
330	 18	137.5	33.1	 16
331	 18	125.3	22.9	 16
332	 18	96.5	31.1	 16
333	 18	138.0	34.3	 16
334	 18	67.8	16.9	 16
335	 18	219.8	37.6	 16
336	 18	113.0	19.7	 16
337	 18	67.8	13.1	 16
338	 18	117.5	19.2	 16
339	 18	891.3	244.3	 16
340	 18	82.3	13.6	 16
341	 18	55.0	8.8	 16
342	 18	173.8	26.2	 16
343	 18	63.3	14.2	 16
344	 18	94.0	11.9	 16
345	 18	93.0	14.1	 16
346	 18	104.0	16.1	 16
347	 18	249.5	27.2	 16
348	 18	148.0	15.5	 16
349	 18	170.5	25.6	 16
350	 18	60.3	11.9	 16
351	 18	79.5	15.3	 16
352	 18	853.5	79.3	 16
353	 18	56.3	9.2	 16
354	 18	157.8	31.9	 16
355	 18	63.0	12.0	 16
356	 18	76.0	10.8	 16
357	 18	87.8	20.8	 16
358	 18	96.0	25.0	 16
359	 18	57.0	13.9	 16
360	 18	63.3	9.5	 16
361	 18	139.3	39.4	 16
362	 18	82.5	14.4	 16
363	 18	147.5	23.9	 16
364	 18	152.0	27.5	 16
365	 18	122.5	18.2	 16
366	 18	93.3	28.0	 16
367	 18	67.3	10.2	 16
368	 18	69.5	17.5	 16
369	 18	217.3	46.1	 16
370	 18	57.3	12.4	 16
371	 18	59.5	9.3	 16
372	 18	74.3	10.9	 16
373	 18	58.0	9.3	 16
374	 18	53.8	10.5	 16
375	 18	60.8	11.1	 16
376	 18	70.3	14.0	 16
377	 18	103.0	17.4	 16
378	 18	55.3	8.2	 16
379	 18	64.5	13.2	 16
380	 18	71.3	15.8	 16
381	 18	192.5	22.3	 16
382	 18	69.0	9.0	 16
383	 18	111.8	22.4	 16
384	 18	103.0	15.1	 16
385	 18	741.3	75.7	 16
386	 18	173.0	22.8	 16
387	 18	121.8	24.3	 16
388	 18	51.3	12.0	 16
389	 18	116.5	17.2	 16
390	 18	69.5	16.7	 16
391	 18	91.0	15.6	 16
392	 18	58.8	13.3	 16
393	 18	68.3	10.6	 16
394	 18	87.0	8.5	 16
395	 18	196.8	30.2	 16
396	 18	115.8	18.0	 16
397	 18	56.3	11.1	 16
398	 18	67.8	11.4	 16
399	 18	56.0	7.2	 16
400	 18	67.3	16.1	 16
401	 18	62.5	11.6	 16
402	 18	153.5	24.1	 16
403	 18	101.8	26.8	 16
404	 18	348.8	68.2	 16
405	 18	64.0	14.9	 16
406	 18	64.3	9.9	 16
407	 18	92.8	15.1	 16
408	 18	62.3	9.3	 16
409	 18	52.5	10.0	 16
410	 18	55.3	8.5	 16
411	 18	71.5	17.0	 16
412	 18	95.5	14.3	 16
413	 18	98.8	21.0	 16
414	 18	130.3	16.1	 16
415	 18	60.5	10.6	 16
416	 18	54.3	7.4	 16
417	 18	53.8	18.4	 16
418	 18	85.5	20.2	 16
419	 18	54.3	10.8	 16
420	 18	86.8	16.2	 16
421	 18	75.5	11.4	 16
422	 18	193.0	22.5	 16
423	 18	137.0	19.4	 16
424	 18	113.5	15.9	 16
425	 18	81.0	13.2	 16
426	 18	226.3	27.6	 16
427	 18	139.5	27.8	 16
428	 18	61.3	12.5	 16
429	 18	68.5	11.0	 16
430	 18	216.0	28.1	 16
431	 18	205.8	24.7	 16
432	 18	178.3	24.7	 16
433	 18	65.3	11.5	 16
434	 18	106.3	19.7	 16
435	 18	75.0	10.5	 16
436	 18	89.5	16.2	 16
437	 18	91.3	17.6	 16
438	 18	86.0	15.2	 16
439	 18	58.3	12.7	 16
440	 18	83.5	10.3	 20
441	 18	91.0	14.4	 16
442	 18	179.3	20.6	 16
443	 18	208.3	36.9	 16
444	 18	114.5	16.6	 16
445	 18	85.0	18.3	 16
446	 18	112.3	19.7	 16
447	 18	70.8	14.2	 16
448	 18	97.8	20.4	 16
449	 18	56.3	7.4	 16
450	 18	68.3	14.9	 16
451	 18	83.3	14.0	 16
452	 18	175.3	30.1	 16
453	 18	109.0	18.6	 16
454	 18	74.0	15.0	 16
455	 18	71.5	11.5	 16
456	 18	66.5	14.1	 16
457	 18	52.3	9.4	 16
458	 18	63.8	10.6	 16
459	 18	62.8	8.1	 16
460	 18	92.5	14.6	 16
461	 18	75.8	16.9	 16
462	 18	167.3	37.3	 16
463	 18	145.0	32.5	 16
464	 18	253.0	55.9	 16
465	 18	211.0	37.0	 16
466	 18	63.0	12.1	 16
467	 18	238.8	33.9	 16
468	 18	96.5	18.5	 16
469	 18	66.0	18.9	 16
470	 18	119.8	12.1	 16
471	 18	74.0	15.3	 16
472	 18	92.8	19.6	 16
473	 18	59.0	10.3	 16
474	 18	77.0	13.9	 16
475	 18	327.3	29.8	 16
476	 18	85.3	17.4	 16
477	 18	57.0	10.7	 16
478	 18	211.3	35.6	 16
479	 18	227.8	30.0	 16
480	 18	136.0	20.6	 16
481	 18	92.3	13.4	 16
482	 18	414.0	57.2	 16
483	 18	157.0	34.0	 16
484	 18	65.3	13.8	 16
485	 18	233.0	60.5	 16
486	 18	75.5	12.8	 16
487	 18	229.5	42.6	 16
488	 18	57.0	9.2	 16
489	 18	75.5	14.3	 16
490	 18	85.5	12.2	 16
491	 18	62.0	9.5	 16
492	 18	56.0	10.2	 16
493	 18	93.5	17.2	 16
494	 18	486.3	108.9	 16
495	 18	226.3	28.7	 16
496	 18	123.5	16.7	 16
497	 18	72.0	12.3	 16
498	 18	182.0	24.4	 16
499	 18	73.0	15.9	 16
500	 18	69.3	13.8	 16
501	 18	65.0	14.3	 16
502	 18	79.5	12.5	 16
503	 18	90.5	12.5	 16
504	 18	80.0	15.6	 16
505	 18	55.3	9.6	 16
506	 18	58.5	15.3	 16
507	 18	65.0	19.1	 16
508	 18	59.5	42.3	 16
509	 18	63.5	18.3	 16
510	 18	81.5	12.5	 16
511	 18	163.3	28.5	 16
512	 18	62.8	10.8	 16
513	 18	72.5	11.7	 16
514	 18	70.0	9.9	 16
515	 18	250.0	30.3	 16
516	 18	109.3	16.0	 16
517	 18	81.3	11.7	 16
518	 18	111.0	19.7	 16
519	 18	54.3	10.4	 16
520	 18	68.5	13.3	 16
521	 18	71.5	10.1	 16
522	 18	59.3	13.8	 16
523	 18	156.8	23.3	 16
524	 18	58.0	9.8	 16
525	 18	69.5	11.5	 16
526	 18	64.5	11.5	 16
527	 18	55.5	7.8	 16
528	 18	127.3	12.9	 16
529	 18	58.5	12.8	 16
530	 18	76.8	16.4	 16
531	 18	66.8	13.0	 16
532	 18	76.0	18.5	 16
533	 18	94.8	21.5	 16
534	 18	106.8	13.0	 16
535	 18	62.3	14.0	 16
536	 18	70.3	12.8	 16
537	 18	55.0	11.7	 16
538	 18	53.3	8.7	 16
539	 18	59.0	11.9	 16
540	 18	142.5	22.1	 16
541	 18	310.5	38.9	 16
542	 18	225.0	20.7	 16
543	 18	105.0	14.6	 16
544	 18	59.3	16.8	 16
545	 18	123.0	17.5	 16
546	 18	155.8	21.8	 16
547	 18	163.0	22.3	 16
548	 18	107.8	14.0	 16
549	 18	92.3	11.3	 16
550	 18	324.0	31.7	 16
551	 18	136.0	28.9	 16
552	 18	188.0	29.4	 16
553	 18	86.0	12.8	 16
554	 18	109.8	14.1	 16
555	 18	113.5	16.9	 16
556	 18	113.8	17.3	 16
557	 18	58.5	9.5	 16
558	 18	99.0	26.4	 20
559	 18	1041.5	169.2	 16
560	 18	75.5	15.1	 16
561	 18	63.0	8.3	 16
562	 18	70.3	12.8	 16
563	 18	212.5	25.4	 16
564	 18	431.0	71.5	 16
565	 18	58.8	13.5	 16
566	 18	69.0	13.0	 12
567	 18	85.3	13.4	 16
568	 18	62.3	9.3	 16
569	 18	86.3	13.5	 16
570	 18	71.0	14.6	 16
571	 18	66.3	12.3	 16
572	 18	69.5	17.7	 16
573	 18	162.0	20.7	 16
574	 18	124.3	16.4	 16
575	 18	585.3	77.8	 16
576	 18	291.0	34.8	 16
577	 18	120.3	23.5	 16
578	 18	82.5	11.7	 16
579	 18	96.3	17.6	 16
580	 18	789.5	52.7	 16
581	 18	186.3	25.5	 16
582	 18	214.8	24.3	 16
583	 18	79.3	13.7	 16
584	 18	537.3	55.5	 16
585	 18	255.0	34.5	 16
586	 18	144.3	16.9	 16
587	 18	57.8	9.1	 16
588	 18	52.3	8.3	 16
589	 18	151.3	28.6	 16
590	 18	199.3	29.7	 16
591	 18	66.3	8.3	 16
592	 18	85.3	14.2	 16
593	 18	82.3	13.9	 16
594	 18	77.5	15.2	 16
595	 18	84.5	9.7	 16
596	 18	541.8	40.1	 16
597	 18	214.0	34.5	 16
598	 18	72.0	18.0	 16
599	 18	93.8	16.3	 16
600	 18	117.0	18.3	 16
601	 18	632.0	56.9	 16
602	 18	1254.8	78.8	 16
603	 18	177.5	20.4	 16
604	 18	216.8	29.0	 16
605	 18	107.3	16.0	 16
606	 18	115.3	16.4	 16
607	 18	80.5	12.5	 16
608	 18	102.5	20.6	 16
609	 18	86.0	14.3	 16
610	 18	63.8	10.2	 16
611	 18	128.3	12.2	 16
612	 18	59.5	9.1	 16
613	 18	54.3	11.1	 16
614	 18	62.0	11.9	 16
615	 18	299.0	43.0	 16
616	 18	233.3	41.8	 16
617	 18	126.3	21.4	 16
618	 18	191.5	31.7	 16
619	 18	96.8	20.8	 16
620	 18	466.0	72.3	 16
621	 18	133.5	40.8	 16
622	 18	514.5	36.8	 16
623	 18	121.5	17.6	 16
624	 18	219.8	32.4	 16
625	 18	461.0	45.0	 16
626	 18	99.3	15.9	 16
627	 18	73.3	13.7	 16
628	 18	292.0	36.2	 16
629	 18	146.8	17.1	 16
630	 18	133.8	22.6	 16
631	 18	86.8	11.8	 16
632	 18	52.8	9.8	 16
633	 18	68.3	11.5	 16
634	 18	79.3	16.3	 16
635	 18	130.3	21.9	 16
636	 18	56.0	10.3	 16
637	 18	62.0	11.3	 16
638	 18	78.3	7.8	 16
639	 18	451.8	30.7	 16
640	 18	99.5	16.4	 16
641	 18	92.0	15.4	 16
642	 18	288.3	44.2	 16
643	 18	202.3	21.5	 16
644	 18	72.0	17.0	 16
645	 18	119.5	17.4	 16
646	 18	119.0	17.5	 16
647	 18	161.3	21.2	 16
648	 18	160.0	23.1	 16
649	 18	146.5	16.7	 16
650	 18	140.3	27.1	 16
651	 18	52.0	7.9	 16
652	 18	72.3	18.2	 16
653	 18	126.5	27.0	 16
654	 18	113.3	20.3	 16
655	 18	62.3	13.2	 16
656	 18	53.5	14.3	 16
657	 18	190.8	28.0	 16
658	 18	53.0	9.4	 16
659	 18	115.0	16.4	 16
660	 18	62.0	8.7	 16
661	 18	61.3	12.8	 16
662	 18	90.0	27.3	 16
663	 18	72.3	20.8	 16
664	 18	73.3	14.6	 16
665	 18	80.5	13.8	 16
666	 18	119.3	13.5	 16
667	 18	63.8	10.7	 16
668	 18	54.3	9.0	 16
669	 18	70.0	11.6	 16
670	 18	80.3	13.0	 16
671	 18	795.3	105.2	 16
672	 18	879.5	85.8	 16
673	 18	62.8	11.8	 16
674	 18	139.8	28.3	 16
675	 18	420.5	70.0	 16
676	 18	114.3	22.6	 16
677	 18	1018.3	139.2	 20
678	 18	75.5	12.9	 16
679	 18	103.0	18.1	 16
680	 18	98.0	16.5	 16
681	 18	130.3	25.6	 16
682	 18	91.5	21.2	 16
683	 18	80.0	12.7	 16
684	 18	138.8	21.6	 16
685	 18	178.0	23.6	 16
686	 18	121.3	24.4	 16
687	 18	191.0	21.1	 16
688	 18	280.3	55.4	 16
689	 18	62.3	8.9	 16
690	 18	99.5	15.7	 16
691	 18	81.8	15.0	 16
692	 18	132.3	21.2	 16
693	 18	165.0	28.5	 16
694	 18	85.8	18.2	 16
695	 18	69.5	14.9	 16
696	 18	1140.5	237.5	 16
697	 18	131.3	20.2	 16
698	 18	146.0	34.3	 16
699	 18	62.5	15.3	 16
700	 18	63.3	9.7	 16
701	 18	115.3	41.5	 16
702	 18	265.3	47.4	 16
703	 18	99.5	15.0	 16
704	 18	319.3	45.4	 16
705	 18	225.8	29.6	 16
706	 18	118.0	18.9	 16
707	 18	165.0	32.8	 16
708	 18	61.3	13.0	 16
709	 18	123.3	18.3	 16
710	 18	886.0	109.1	 16
711	 18	6134.5	1086.6	 16
  0	 19	92.8	13.6	 16
  1	 19	160.5	26.4	 16
  2	 19	104.0	14.7	 16
  3	 19	428.5	38.3	 16
  4	 19	213.8	29.9	 16
  5	 19	340.8	46.5	 16
  6	 19	93.5	17.3	 16
  7	 19	77.8	11.5	 16
  8	 19	247.0	38.6	 16
  9	 19	56.0	11.9	 16
 10	 19	79.0	11.2	 16
 11	 19	297.3	41.7	 16
 12	 19	205.8	22.2	 16
 13	 19	174.8	35.8	 16
 14	 19	490.5	65.2	 16
 15	 19	265.3	35.9	 16
 16	 19	414.8	59.8	 16
 17	 19	283.0	29.7	 16
 18	 19	238.0	24.9	 16
 19	 19	190.0	25.0	 16
 20	 19	99.3	19.3	 16
 21	 19	116.5	15.2	 16
 22	 19	341.8	66.3	 16
 23	 19	645.0	134.7	 16
 24	 19	1421.8	287.1	 16
 25	 19	157.0	27.9	 16
 26	 19	167.5	30.4	 16
 27	 19	825.5	173.4	 16
 28	 19	70.8	12.5	 16
 29	 19	62.0	10.8	 16
 30	 19	70.0	10.4	 16
 31	 19	396.5	76.1	 16
 32	 19	79.3	13.2	 16
 33	 19	99.0	16.4	 16
 34	 19	320.8	69.9	 16
 35	 19	196.0	30.8	 16
 36	 19	559.8	118.0	 16
 37	 19	182.5	22.2	 16
 38	 19	4955.3	957.0	 16
 39	 19	648.5	100.1	 16
 40	 19	161.8	28.3	 16
 41	 19	81.5	15.8	 16
 42	 19	81.8	23.6	 16
 43	 19	298.0	64.4	 16
 44	 19	834.0	166.9	 16
 45	 19	115.0	20.7	 16
 46	 19	321.3	53.6	 16
 47	 19	694.0	97.6	 16
 48	 19	203.3	36.4	 16
 49	 19	2056.0	405.9	 16
 50	 19	79.5	19.9	 16
 51	 19	190.8	21.7	 16
 52	 19	228.8	32.3	 16
 53	 19	276.3	41.1	 16
 54	 19	87.3	17.3	 16
 55	 19	821.5	136.8	 16
 56	 19	1351.8	216.4	 16
 57	 19	117.3	28.2	 16
 58	 19	314.3	37.7	 16
 59	 19	568.0	84.2	 16
 60	 19	202.0	25.9	 16
 61	 19	772.0	129.7	 16
 62	 19	168.5	21.4	 16
 63	 19	730.8	110.0	 16
 64	 19	280.8	37.8	 16
 65	 19	175.0	30.0	 16
 66	 19	112.5	19.1	 16
 67	 19	100.0	16.4	 16
 68	 19	118.8	27.4	 16
 69	 19	288.8	33.1	 16
 70	 19	1099.0	127.4	 16
 71	 19	883.0	76.3	 16
 72	 19	255.8	26.9	 16
 73	 19	418.8	37.9	 16
 74	 19	1133.3	135.3	 16
 75	 19	87.5	18.3	 16
 76	 19	100.5	21.3	 16
 77	 19	821.3	93.8	 16
 78	 19	111.5	18.2	 16
 79	 19	82.3	19.9	 16
 80	 19	70.0	7.9	 16
 81	 19	94.3	13.8	 16
 82	 19	88.8	14.0	 16
 83	 19	565.5	52.4	 16
 84	 19	112.0	20.2	 16
 85	 19	279.3	61.9	 20
 86	 19	255.8	37.0	 16
 87	 19	3801.0	1011.9	 16
 88	 19	212.5	45.4	 16
 89	 19	116.3	21.1	 16
 90	 19	1712.8	424.3	 16
 91	 19	229.0	46.4	 16
 92	 19	65.5	10.4	 16
 93	 19	87.5	17.7	 16
 94	 19	137.0	22.8	 16
 95	 19	494.3	78.6	 16
 96	 19	1322.3	245.0	 16
 97	 19	114.5	23.7	 16
 98	 19	131.5	29.3	 16
 99	 19	78.5	14.8	 16
100	 19	142.0	22.0	 16
101	 19	131.8	28.9	 16
102	 19	771.0	64.9	 16
103	 19	314.8	33.1	 16
104	 19	308.0	58.2	 16
105	 19	407.0	59.3	 16
106	 19	437.5	57.3	 16
107	 19	428.5	60.1	 16
108	 19	81.5	17.6	 16
109	 19	85.8	11.0	 16
110	 19	86.3	17.6	 16
111	 19	249.8	34.3	 16
112	 19	285.5	56.4	 16
113	 19	1945.0	268.6	 16
114	 19	94.5	11.5	 16
115	 19	105.0	14.5	 16
116	 19	112.0	15.5	 16
117	 19	74.5	10.0	 16
118	 19	70.5	12.0	 16
119	 19	3178.8	572.6	 16
120	 19	61.3	12.9	 16
121	 19	57.3	12.8	 16
122	 19	81.3	15.5	 16
123	 19	93.8	16.5	 16
124	 19	80.8	13.5	 16
125	 19	101.3	17.0	 16
126	 19	236.8	44.4	 16
127	 19	676.8	49.7	 16
128	 19	155.3	27.7	 16
129	 19	97.8	12.2	 16
130	 19	132.5	30.6	 16
131	 19	511.5	70.2	 16
132	 19	138.3	19.2	 16
133	 19	59.0	10.9	 16
134	 19	169.3	31.8	 16
135	 19	64.0	11.3	 16
136	 19	68.0	8.2	 16
137	 19	597.8	163.5	 16
138	 19	111.3	44.1	 16
139	 19	251.0	41.4	 16
140	 19	90.0	14.9	 16
141	 19	1206.5	296.6	 16
142	 19	80.5	12.5	 16
143	 19	348.0	84.6	 16
144	 19	56.5	9.1	 16
145	 19	483.0	115.2	 16
146	 19	202.3	51.1	 16
147	 19	83.0	11.3	 16
148	 19	71.5	15.8	 16
149	 19	80.3	21.2	 16
150	 19	164.8	30.9	 16
151	 19	205.0	28.9	 16
152	 19	105.0	16.7	 16
153	 19	316.3	63.0	 16
154	 19	1475.8	269.2	 16
155	 19	323.3	54.9	 16
156	 19	84.3	13.2	 16
157	 19	288.5	36.9	 16
158	 19	563.3	103.2	 16
159	 19	156.0	22.2	 16
160	 19	473.8	65.8	 16
161	 19	86.5	14.0	 16
162	 19	195.8	29.4	 16
163	 19	327.0	28.3	 16
164	 19	180.5	19.6	 16
165	 19	80.3	14.2	 16
166	 19	155.5	19.0	 16
167	 19	87.3	18.9	 16
168	 19	689.0	62.7	 16
169	 19	78.3	12.3	 16
170	 19	646.8	59.9	 16
171	 19	117.5	14.8	 16
172	 19	123.0	16.3	 16
173	 19	515.8	36.2	 16
174	 19	149.3	23.0	 16
175	 19	72.3	9.2	 16
176	 19	129.3	25.7	 16
177	 19	54.8	9.9	 16
178	 19	204.0	38.2	 16
179	 19	127.8	18.9	 16
180	 19	235.3	30.6	 16
181	 19	309.0	42.4	 16
182	 19	76.0	7.6	 16
183	 19	527.3	73.6	 16
184	 19	96.5	17.1	 16
185	 19	197.8	37.2	 16
186	 19	212.5	40.0	 16
187	 19	451.8	65.2	 16
188	 19	77.8	28.8	 16
189	 19	57.5	10.4	 16
190	 19	174.0	27.9	 16
191	 19	476.8	53.4	 16
192	 19	198.3	26.7	 16
193	 19	369.8	46.7	 16
194	 19	91.3	16.2	 16
195	 19	943.5	98.2	 16
196	 19	80.5	15.6	 16
197	 19	112.3	19.7	 16
198	 19	91.0	20.8	 16
199	 19	450.0	56.0	 16
200	 19	540.3	58.5	 16
201	 19	875.3	65.2	 16
202	 19	205.3	31.3	 16
203	 19	139.5	23.2	 20
204	 19	212.3	34.5	 16
205	 19	172.3	40.3	 16
206	 19	77.3	19.2	 16
207	 19	82.8	19.1	 16
208	 19	988.8	223.6	 16
209	 19	70.8	18.1	 16
210	 19	81.3	17.7	 16
211	 19	80.8	16.3	 16
212	 19	56.8	15.8	 16
213	 19	88.8	16.4	 16
214	 19	68.5	12.2	 16
215	 19	1350.0	307.6	 16
216	 19	77.0	10.7	 16
217	 19	909.0	156.0	 16
218	 19	116.0	19.6	 16
219	 19	68.3	11.5	 16
220	 19	75.0	15.3	 16
221	 19	91.5	16.3	 16
222	 19	546.3	100.2	 16
223	 19	61.5	10.1	 16
224	 19	439.5	73.9	 16
225	 19	58.5	12.8	 16
226	 19	67.5	8.7	 16
227	 19	189.3	31.5	 16
228	 19	115.0	16.9	 16
229	 19	3292.5	562.2	 16
230	 19	312.5	55.0	 16
231	 19	638.8	102.0	 12
232	 19	60.3	8.4	 16
233	 19	70.0	16.1	 16
234	 19	76.5	18.8	 16
235	 19	207.3	30.1	 16
236	 19	319.3	62.3	 16
237	 19	91.3	23.9	 16
238	 19	244.3	45.4	 16
239	 19	68.0	14.0	 16
240	 19	133.3	20.4	 16
241	 19	147.5	20.6	 16
242	 19	71.3	13.5	 16
243	 19	106.5	16.9	 16
244	 19	128.8	20.2	 16
245	 19	105.8	16.0	 16
246	 19	128.8	21.5	 16
247	 19	62.0	9.3	 16
248	 19	2808.3	383.0	 16
249	 19	65.3	11.6	 16
250	 19	45.3	6.4	 16
251	 19	95.5	19.3	 16
252	 19	59.0	7.2	 16
253	 19	68.0	14.7	 16
254	 19	75.3	13.0	 16
255	 19	60.0	8.7	 16
256	 19	66.3	9.7	 16
257	 19	141.3	21.6	 16
258	 19	64.3	13.9	 16
259	 19	582.0	78.2	 16
260	 19	161.0	21.9	 16
261	 19	379.5	41.6	 16
262	 19	698.0	86.4	 16
263	 19	69.3	14.5	 16
264	 19	222.5	34.8	 16
265	 19	81.8	12.3	 16
266	 19	264.0	34.8	 16
267	 19	146.3	16.3	 16
268	 19	113.5	14.2	 16
269	 19	218.5	39.9	 16
270	 19	188.5	32.8	 16
271	 19	1943.5	232.6	 16
272	 19	1409.5	143.8	 16
273	 19	88.3	17.1	 16
274	 19	144.3	14.6	 16
275	 19	135.3	15.0	 16
276	 19	144.8	21.5	 16
277	 19	66.3	23.9	 16
278	 19	282.3	42.1	 16
279	 19	91.8	11.5	 16
280	 19	203.0	26.7	 16
281	 19	55.5	10.0	 16
282	 19	66.0	11.3	 16
283	 19	60.3	7.5	 16
284	 19	85.8	14.6	 16
285	 19	66.0	13.5	 16
286	 19	76.0	5.6	 16
287	 19	249.8	34.2	 16
288	 19	67.0	9.2	 16
289	 19	304.5	45.6	 16
290	 19	634.3	87.6	 16
291	 19	454.5	56.7	 16
292	 19	69.0	14.3	 16
293	 19	341.3	57.5	 16
294	 19	261.8	32.1	 16
295	 19	102.5	18.6	 16
296	 19	107.5	19.5	 16
297	 19	75.3	12.0	 16
298	 19	74.3	16.0	 16
299	 19	136.3	21.8	 16
300	 19	65.3	15.4	 16
301	 19	70.0	13.1	 16
302	 19	170.8	25.6	 16
303	 19	260.3	33.7	 16
304	 19	464.3	49.3	 16
305	 19	89.3	14.6	 16
306	 19	176.3	19.5	 16
307	 19	235.0	43.9	 16
308	 19	124.8	18.4	 16
309	 19	96.8	26.5	 16
310	 19	354.8	56.0	 16
311	 19	65.5	11.7	 16
312	 19	1157.5	333.6	 16
313	 19	59.3	14.2	 16
314	 19	129.8	27.0	 16
315	 19	245.5	34.8	 16
316	 19	58.3	10.0	 16
317	 19	384.5	50.4	 16
318	 19	180.0	24.3	 16
319	 19	135.0	25.8	 16
320	 19	527.0	54.3	 16
321	 19	436.3	60.2	 16
322	 19	72.0	8.8	 20
323	 19	88.0	11.4	 16
324	 19	147.5	30.8	 16
325	 19	69.0	23.7	 16
326	 19	868.8	261.6	 16
327	 19	80.3	19.4	 16
328	 19	49.5	7.1	 16
329	 19	50.5	7.9	 16
330	 19	53.3	10.8	 16
331	 19	86.3	16.0	 16
332	 19	62.0	8.7	 16
333	 19	647.0	190.5	 16
334	 19	148.5	72.6	 16
335	 19	549.3	107.3	 16
336	 19	53.3	10.1	 16
337	 19	63.5	11.0	 16
338	 19	190.3	35.4	 16
339	 19	76.5	15.7	 16
340	 19	76.3	11.4	 16
341	 19	56.3	7.3	 16
342	 19	64.3	15.1	 16
343	 19	59.3	12.7	 16
344	 19	59.0	12.7	 16
345	 19	63.8	10.9	 16
346	 19	56.3	8.4	 16
347	 19	60.3	12.3	 16
348	 19	149.0	21.7	 16
349	 19	420.0	73.7	 16
350	 19	76.5	15.4	 16
351	 19	192.5	31.6	 16
352	 19	86.5	20.5	 16
353	 19	224.0	30.5	 16
354	 19	88.3	15.3	 16
355	 19	137.8	20.1	 16
356	 19	148.3	19.7	 16
357	 19	792.8	119.5	 16
358	 19	6702.3	1032.0	 16
359	 19	263.8	39.1	 16
360	 19	307.8	105.1	 16
361	 19	982.5	155.5	 16
362	 19	131.3	20.7	 16
363	 19	150.8	30.1	 16
364	 19	364.3	60.9	 16
365	 19	105.3	13.0	 16
366	 19	179.3	25.8	 16
367	 19	66.3	11.0	 16
368	 19	80.3	12.3	 16
369	 19	184.5	30.2	 16
370	 19	76.0	14.1	 16
371	 19	80.5	10.2	 16
372	 19	90.5	10.6	 16
373	 19	353.8	53.8	 16
374	 19	149.0	32.2	 16
375	 19	71.0	14.7	 16
376	 19	190.8	23.2	 16
377	 19	275.5	30.7	 16
378	 19	80.3	13.5	 16
379	 19	68.5	11.7	 16
380	 19	3739.8	388.1	 16
381	 19	403.8	48.0	 16
382	 19	91.5	14.2	 16
383	 19	119.0	15.5	 16
384	 19	1079.3	124.6	 16
385	 19	113.5	17.2	 16
386	 19	79.8	19.1	 16
387	 19	345.5	44.5	 16
388	 19	114.3	20.2	 16
389	 19	54.0	13.3	 16
390	 19	135.5	20.5	 16
391	 19	90.3	17.3	 16
392	 19	98.5	11.4	 16
393	 19	483.5	77.3	 16
394	 19	72.3	13.3	 16
395	 19	448.3	45.9	 16
396	 19	128.5	20.8	 16
397	 19	60.3	12.8	 16
398	 19	67.5	17.1	 16
399	 19	233.5	33.1	 16
400	 19	2295.3	304.9	 16
401	 19	53.3	9.9	 16
402	 19	452.0	62.0	 16
403	 19	195.3	24.2	 16
404	 19	106.5	11.6	 16
405	 19	74.3	16.5	 16
406	 19	85.3	12.3	 16
407	 19	174.5	23.8	 16
408	 19	2376.0	868.8	 16
409	 19	6039.0	391.6	 16
410	 19	68.3	10.3	 16
411	 19	88.0	11.7	 16
412	 19	199.0	32.2	 16
413	 19	79.5	11.8	 16
414	 19	142.5	19.8	 16
415	 19	93.0	20.5	 16
416	 19	147.8	20.9	 16
417	 19	74.5	15.1	 16
418	 19	1649.5	168.3	 16
419	 19	73.3	12.9	 16
420	 19	264.5	29.2	 16
421	 19	60.5	11.2	 16
422	 19	210.5	38.6	 16
423	 19	641.8	72.2	 16
424	 19	411.8	52.4	 16
425	 19	664.0	85.3	 16
426	 19	109.5	15.3	 16
427	 19	191.3	36.0	 16
428	 19	318.3	41.5	 16
429	 19	153.3	25.8	 16
430	 19	63.0	11.0	 16
431	 19	244.0	23.5	 16
432	 19	226.8	31.2	 16
433	 19	121.8	21.9	 16
434	 19	2896.8	241.4	 16
435	 19	77.0	11.3	 16
436	 19	216.5	30.2	 16
437	 19	316.5	44.4	 16
438	 19	61.3	13.4	 16
439	 19	57.3	8.4	 16
440	 19	105.3	26.2	 16
441	 19	208.5	34.6	 20
442	 19	108.0	18.0	 16
443	 19	156.0	20.3	 16
444	 19	444.8	86.0	 16
445	 19	177.3	25.9	 16
446	 19	186.3	19.8	 16
447	 19	107.3	21.3	 16
448	 19	90.8	12.3	 16
449	 19	119.8	23.6	 16
450	 19	71.3	14.7	 16
451	 19	127.5	21.9	 16
452	 19	92.5	17.5	 16
453	 19	59.5	12.5	 16
454	 19	65.5	9.1	 16
455	 19	57.8	11.2	 16
456	 19	145.5	42.0	 16
457	 19	65.5	15.9	 16
458	 19	806.5	211.3	 16
459	 19	107.3	25.8	 16
460	 19	88.0	16.0	 16
461	 19	60.5	9.3	 16
462	 19	93.0	14.2	 16
463	 19	105.5	18.4	 16
464	 19	85.5	28.5	 16
465	 19	51.0	9.0	 16
466	 19	54.8	9.0	 16
467	 19	58.8	12.2	 16
468	 19	807.0	152.4	 16
469	 19	105.3	16.8	 16
470	 19	1490.8	192.9	 16
471	 19	897.5	160.7	 16
472	 19	94.3	14.8	 16
473	 19	132.3	24.0	 16
474	 19	59.8	14.2	 16
475	 19	272.3	45.9	 16
476	 19	407.0	97.2	 16
477	 19	61.0	10.2	 16
478	 19	122.5	18.7	 16
479	 19	141.0	23.5	 16
480	 19	151.0	27.2	 16
481	 19	71.3	12.7	 16
482	 19	79.5	14.4	 16
483	 19	74.0	14.4	 16
484	 19	69.5	12.9	 16
485	 19	601.8	76.9	 16
486	 19	638.5	67.4	 16
487	 19	317.0	33.1	 16
488	 19	914.0	142.9	 16
489	 19	132.5	23.3	 16
490	 19	116.5	33.3	 16
491	 19	153.0	24.6	 16
492	 19	75.3	12.8	 16
493	 19	91.3	20.7	 16
494	 19	89.8	13.4	 16
495	 19	96.5	14.0	 16
496	 19	2440.5	476.6	 16
497	 19	643.0	140.1	 16
498	 19	1122.8	232.5	 16
499	 19	73.3	12.9	 16
500	 19	68.8	11.8	 16
501	 19	94.8	14.0	 16
502	 19	97.5	21.9	 16
503	 19	466.0	95.9	 16
504	 19	96.5	20.3	 16
505	 19	82.3	13.4	 16
506	 19	107.5	17.7	 16
507	 19	504.5	70.8	 16
508	 19	89.8	11.2	 16
509	 19	1829.8	314.7	 16
510	 19	260.8	46.4	 16
511	 19	144.3	24.7	 16
512	 19	59.5	12.2	 16
513	 19	59.5	13.2	 16
514	 19	575.8	101.5	 16
515	 19	90.3	12.1	 16
516	 19	99.8	14.9	 16
517	 19	566.3	91.6	 16
518	 19	63.0	8.4	 16
519	 19	54.5	12.2	 16
520	 19	63.3	13.6	 16
521	 19	70.5	12.5	 16
522	 19	65.5	9.4	 16
523	 19	734.3	94.5	 16
524	 19	81.5	19.9	 16
525	 19	161.5	20.8	 16
526	 19	395.3	38.4	 16
527	 19	113.5	22.9	 16
528	 19	132.3	21.6	 16
529	 19	336.5	44.7	 16
530	 19	134.3	17.7	 16
531	 19	954.0	74.4	 16
532	 19	234.0	25.0	 16
533	 19	188.0	20.0	 16
534	 19	110.3	12.5	 16
535	 19	188.0	22.4	 16
536	 19	67.0	12.8	 16
537	 19	154.5	15.6	 16
538	 19	63.3	10.6	 16
539	 19	379.0	41.5	 16
540	 19	276.3	26.4	 16
541	 19	84.3	15.6	 16
542	 19	121.3	22.0	 16
543	 19	421.8	37.8	 16
544	 19	82.3	17.9	 16
545	 19	255.8	34.5	 16
546	 19	87.3	17.9	 16
547	 19	61.8	10.7	 16
548	 19	221.5	24.4	 16
549	 19	308.5	35.4	 16
550	 19	74.5	13.3	 16
551	 19	96.3	12.2	 16
552	 19	61.0	12.0	 16
553	 19	110.0	14.7	 16
554	 19	83.8	11.7	 16
555	 19	61.0	9.6	 16
556	 19	114.3	13.9	 16
557	 19	989.3	105.4	 16
558	 19	76.8	14.8	 16
559	 19	1694.5	252.0	 20
560	 19	215.5	24.6	 16
561	 19	68.0	13.0	 16
562	 19	322.3	66.9	 16
563	 19	380.0	52.1	 16
564	 19	68.8	12.4	 16
565	 19	58.3	9.9	 16
566	 19	1387.8	280.8	 16
567	 19	96.5	18.7	 16
568	 19	742.3	113.5	 16
569	 19	97.5	23.3	 16
570	 19	92.0	23.5	 16
571	 19	125.0	26.8	 16
572	 19	86.5	15.5	 16
573	 19	85.8	15.5	 16
574	 19	133.3	16.5	 16
575	 19	99.5	12.9	 16
576	 19	85.0	13.1	 16
577	 19	89.0	15.4	 16
578	 19	129.5	19.5	 16
579	 19	339.8	44.5	 16
580	 19	547.0	61.6	 16
581	 19	606.3	67.0	 16
582	 19	136.3	15.1	 16
583	 19	348.3	38.4	 16
584	 19	143.8	24.1	 16
585	 19	121.5	14.1	 16
586	 19	1254.0	107.8	 16
587	 19	3053.8	292.6	 16
588	 19	326.0	39.6	 16
589	 19	77.0	17.1	 16
590	 19	150.3	18.8	 16
591	 19	308.0	33.4	 16
592	 19	118.0	12.5	 16
593	 19	300.5	38.4	 16
594	 19	68.3	8.7	 16
595	 19	71.3	8.3	 16
596	 19	343.5	72.0	 16
597	 19	2807.3	275.6	 16
598	 19	77.8	15.2	 16
599	 19	153.0	30.7	 16
600	 19	110.0	15.0	 16
601	 19	84.8	14.7	 16
602	 19	438.3	49.2	 16
603	 19	234.3	30.6	 16
604	 19	92.5	21.6	 16
605	 19	137.0	23.8	 16
606	 19	93.3	17.6	 16
607	 19	364.8	58.7	 16
608	 19	559.3	70.1	 16
609	 19	97.0	17.2	 16
610	 19	104.8	20.4	 16
611	 19	73.0	9.0	 16
612	 19	86.5	12.3	 16
613	 19	145.3	26.2	 16
614	 19	558.5	90.2	 16
615	 19	1014.0	110.1	 16
616	 19	480.8	38.9	 16
617	 19	2732.3	278.9	 16
618	 19	226.8	39.8	 16
619	 19	89.0	21.4	 16
620	 19	61.3	12.9	 16
621	 19	70.0	12.4	 16
622	 19	585.0	74.5	 16
623	 19	127.3	10.3	 16
624	 19	225.5	27.8	 16
625	 19	137.8	21.5	 16
626	 19	226.3	27.1	 16
627	 19	60.0	11.2	 16
628	 19	62.5	12.3	 16
629	 19	179.0	25.1	 16
630	 19	82.3	15.4	 16
631	 19	113.3	22.0	 16
632	 19	127.3	19.7	 16
633	 19	301.3	29.0	 16
634	 19	440.8	31.6	 16
635	 19	567.8	49.5	 16
636	 19	165.8	21.9	 16
637	 19	87.5	13.3	 16
638	 19	86.0	14.0	 16
639	 19	135.8	33.2	 16
640	 19	260.3	28.1	 16
641	 19	1417.0	106.1	 16
642	 19	588.8	45.2	 16
643	 19	598.3	45.9	 16
644	 19	308.5	31.7	 16
645	 19	176.3	31.7	 16
646	 19	107.8	19.4	 16
647	 19	353.0	69.5	 16
648	 19	873.0	105.5	 16
649	 19	185.3	18.6	 16
650	 19	265.0	30.9	 16
651	 19	280.0	38.9	 16
652	 19	121.3	18.4	 16
653	 19	197.3	27.3	 16
654	 19	768.0	56.8	 16
655	 19	120.5	19.1	 16
656	 19	90.0	12.5	 16
657	 19	130.3	23.8	 16
658	 19	76.5	11.8	 16
659	 19	80.8	16.1	 16
660	 19	231.5	42.8	 16
661	 19	187.8	33.7	 16
662	 19	149.8	19.2	 16
663	 19	59.3	11.6	 16
664	 19	63.3	13.4	 16
665	 19	57.5	18.8	 16
666	 19	411.5	38.7	 16
667	 19	80.3	15.8	 16
668	 19	57.3	13.8	 16
669	 19	584.5	81.1	 16
670	 19	89.8	15.2	 16
671	 19	162.5	15.8	 16
672	 19	62.5	11.7	 16
673	 19	58.3	6.1	 16
674	 19	109.8	18.5	 16
675	 19	77.0	24.2	 16
676	 19	321.3	34.0	 16
677	 19	207.0	26.9	 16
678	 19	51.3	7.9	 20
679	 19	58.5	8.3	 16
680	 19	54.0	7.8	 16
681	 19	74.0	9.5	 16
682	 19	65.5	8.9	 16
683	 19	1242.8	224.8	 16
684	 19	345.3	80.5	 16
685	 19	320.5	65.5	 16
686	 19	62.5	8.4	 16
687	 19	82.0	16.0	 16
688	 19	321.3	71.7	 16
689	 19	346.8	57.4	 16
690	 19	277.5	48.9	 16
691	 19	58.3	16.1	 16
692	 19	376.0	30.8	 16
693	 19	378.5	35.2	 16
694	 19	162.5	21.8	 16
695	 19	223.8	28.6	 16
696	 19	2031.5	291.1	 16
697	 19	78.0	15.2	 16
698	 19	85.5	11.7	 16
699	 19	133.0	26.1	 16
700	 19	107.0	21.7	 16
701	 19	60.3	10.1	 16
702	 19	89.3	23.2	 16
703	 19	68.3	10.8	 16
704	 19	2057.0	345.8	 16
705	 19	52.0	11.1	 16
706	 19	69.0	17.6	 16
707	 19	296.8	35.0	 16
708	 19	524.8	61.0	 16
709	 19	445.3	48.1	 16
710	 19	220.3	63.5	 16
711	 19	92.5	16.1	 16
  0	 20	9014.3	1304.0	 16
  1	 20	116.8	17.4	 16
  2	 20	88.3	17.5	 16
  3	 20	221.0	21.5	 16
  4	 20	377.8	38.7	 16
  5	 20	86.5	16.1	 16
  6	 20	73.3	15.2	 16
  7	 20	67.0	12.2	 16
  8	 20	66.0	12.1	 16
  9	 20	68.0	13.1	 16
 10	 20	66.5	11.2	 16
 11	 20	74.0	10.4	 16
 12	 20	92.8	14.6	 16
 13	 20	134.8	21.7	 16
 14	 20	196.5	25.4	 16
 15	 20	207.5	34.0	 16
 16	 20	202.3	27.5	 16
 17	 20	241.0	33.5	 16
 18	 20	378.5	37.3	 16
 19	 20	191.0	30.1	 16
 20	 20	154.0	25.3	 16
 21	 20	132.3	24.6	 16
 22	 20	94.3	10.4	 16
 23	 20	133.0	29.1	 16
 24	 20	293.5	72.3	 16
 25	 20	125.8	16.4	 16
 26	 20	58.5	10.5	 16
 27	 20	115.3	23.2	 16
 28	 20	60.8	9.6	 16
 29	 20	60.3	12.2	 16
 30	 20	75.0	11.6	 16
 31	 20	202.3	30.1	 16
 32	 20	68.5	10.9	 16
 33	 20	91.0	13.5	 16
 34	 20	101.0	16.6	 16
 35	 20	577.8	73.8	 16
 36	 20	80.3	14.2	 16
 37	 20	86.8	15.4	 16
 38	 20	386.5	89.1	 16
 39	 20	187.3	24.5	 16
 40	 20	159.5	30.3	 16
 41	 20	52.5	7.5	 16
 42	 20	55.0	10.7	 16
 43	 20	73.0	11.5	 16
 44	 20	191.3	30.5	 16
 45	 20	72.0	6.7	 16
 46	 20	78.3	9.6	 16
 47	 20	114.0	16.5	 16
 48	 20	332.0	46.3	 16
 49	 20	440.5	94.3	 16
 50	 20	63.0	12.2	 16
 51	 20	135.8	15.0	 16
 52	 20	108.3	12.6	 16
 53	 20	328.0	46.2	 16
 54	 20	96.3	15.8	 16
 55	 20	297.3	32.7	 16
 56	 20	332.0	47.1	 16
 57	 20	113.3	18.6	 16
 58	 20	236.3	32.8	 16
 59	 20	221.0	32.7	 16
 60	 20	516.3	80.7	 16
 61	 20	88.5	15.5	 16
 62	 20	281.8	31.4	 16
 63	 20	410.8	49.6	 16
 64	 20	168.5	24.2	 16
 65	 20	109.0	21.2	 16
 66	 20	76.3	12.5	 16
 67	 20	66.0	12.1	 16
 68	 20	83.5	13.9	 16
 69	 20	175.8	22.2	 16
 70	 20	350.3	41.0	 16
 71	 20	147.8	19.3	 16
 72	 20	134.5	30.8	 16
 73	 20	287.0	45.8	 16
 74	 20	183.8	25.7	 16
 75	 20	99.5	12.6	 16
 76	 20	112.5	14.0	 16
 77	 20	289.0	34.3	 16
 78	 20	158.0	25.9	 16
 79	 20	61.0	12.1	 16
 80	 20	65.3	10.4	 16
 81	 20	61.0	9.1	 16
 82	 20	54.0	9.5	 16
 83	 20	192.3	23.8	 16
 84	 20	149.0	18.3	 16
 85	 20	136.5	21.0	 16
 86	 20	65.5	12.0	 20
 87	 20	617.3	152.4	 16
 88	 20	105.0	24.4	 16
 89	 20	102.0	24.3	 16
 90	 20	386.0	90.2	 16
 91	 20	160.8	27.7	 16
 92	 20	58.8	11.0	 16
 93	 20	70.5	13.8	 16
 94	 20	82.0	15.0	 16
 95	 20	85.8	15.0	 16
 96	 20	384.3	54.3	 16
 97	 20	75.0	15.2	 16
 98	 20	213.3	24.6	 16
 99	 20	147.3	17.3	 16
100	 20	122.8	22.4	 16
101	 20	96.3	13.7	 16
102	 20	942.8	61.8	 16
103	 20	499.0	51.3	 16
104	 20	311.3	45.4	 16
105	 20	152.5	22.8	 16
106	 20	93.0	17.3	 16
107	 20	79.3	16.7	 16
108	 20	68.0	22.3	 16
109	 20	80.0	11.6	 16
110	 20	65.5	14.5	 16
111	 20	75.0	11.9	 16
112	 20	82.5	17.5	 16
113	 20	271.8	60.3	 16
114	 20	79.3	12.1	 16
115	 20	84.0	12.3	 16
116	 20	86.3	13.0	 16
117	 20	56.5	6.4	 16
118	 20	57.5	10.4	 16
119	 20	344.5	72.4	 16
120	 20	77.0	19.6	 16
121	 20	55.8	11.2	 16
122	 20	65.3	13.2	 16
123	 20	90.0	17.3	 16
124	 20	76.5	15.4	 16
125	 20	84.3	14.4	 16
126	 20	702.5	91.7	 16
127	 20	969.0	164.6	 16
128	 20	289.5	54.9	 16
129	 20	72.3	11.8	 16
130	 20	56.5	10.9	 16
131	 20	315.0	55.1	 16
132	 20	105.3	17.5	 16
133	 20	69.3	11.3	 16
134	 20	72.3	14.3	 16
135	 20	76.3	15.4	 16
136	 20	67.3	17.3	 16
137	 20	94.3	13.4	 16
138	 20	171.3	32.8	 16
139	 20	105.3	13.0	 16
140	 20	149.3	20.7	 16
141	 20	256.5	56.4	 16
142	 20	56.8	13.6	 16
143	 20	97.3	20.7	 16
144	 20	58.3	9.5	 16
145	 20	94.0	15.7	 16
146	 20	62.0	10.2	 16
147	 20	60.3	12.7	 16
148	 20	53.0	10.5	 16
149	 20	79.5	13.2	 16
150	 20	129.3	20.0	 16
151	 20	193.5	49.7	 16
152	 20	73.3	15.5	 16
153	 20	81.0	10.6	 16
154	 20	270.3	57.8	 16
155	 20	186.5	36.5	 16
156	 20	108.3	15.0	 16
157	 20	150.3	26.7	 16
158	 20	80.3	11.7	 16
159	 20	114.3	19.9	 16
160	 20	181.5	25.4	 16
161	 20	72.3	13.2	 16
162	 20	288.3	63.5	 16
163	 20	643.3	73.9	 16
164	 20	138.0	16.4	 16
165	 20	84.3	20.4	 16
166	 20	142.8	14.9	 16
167	 20	66.3	12.7	 16
168	 20	211.0	30.4	 16
169	 20	69.3	18.7	 16
170	 20	124.8	27.9	 16
171	 20	461.5	49.7	 16
172	 20	109.0	13.1	 16
173	 20	248.8	28.3	 16
174	 20	109.0	20.5	 16
175	 20	71.5	13.8	 16
176	 20	87.3	15.1	 16
177	 20	62.0	11.6	 16
178	 20	139.0	14.7	 16
179	 20	165.5	32.5	 16
180	 20	144.3	25.6	 16
181	 20	97.0	16.9	 16
182	 20	57.0	10.4	 16
183	 20	130.5	17.4	 16
184	 20	93.8	13.5	 16
185	 20	60.0	11.7	 16
186	 20	66.0	12.8	 16
187	 20	198.3	35.0	 16
188	 20	52.3	9.2	 16
189	 20	58.3	12.9	 16
190	 20	57.3	6.5	 16
191	 20	64.0	15.2	 16
192	 20	94.0	16.0	 16
193	 20	128.3	24.5	 16
194	 20	86.0	17.9	 16
195	 20	181.0	38.9	 16
196	 20	62.3	10.6	 16
197	 20	127.3	19.0	 16
198	 20	140.3	18.9	 16
199	 20	169.0	31.3	 16
200	 20	160.8	28.9	 16
201	 20	429.8	64.8	 16
202	 20	218.5	30.8	 16
203	 20	87.3	20.4	 16
204	 20	76.3	16.4	 16
205	 20	101.8	19.4	 20
206	 20	81.3	19.9	 16
207	 20	69.3	12.2	 16
208	 20	277.3	62.6	 16
209	 20	57.3	9.6	 16
210	 20	55.3	10.2	 16
211	 20	71.8	12.5	 16
212	 20	50.8	11.8	 16
213	 20	56.3	15.5	 16
214	 20	57.3	10.7	 16
215	 20	91.8	20.4	 16
216	 20	50.3	10.8	 16
217	 20	71.0	16.6	 16
218	 20	64.3	11.6	 16
219	 20	77.5	15.0	 16
220	 20	71.3	14.0	 16
221	 20	111.0	18.0	 16
222	 20	77.8	21.0	 16
223	 20	55.5	11.9	 16
224	 20	75.0	12.3	 16
225	 20	48.8	8.8	 16
226	 20	52.0	9.6	 16
227	 20	221.0	33.2	 16
228	 20	103.3	17.3	 16
229	 20	343.0	58.2	 16
230	 20	66.0	13.6	 16
231	 20	74.0	14.7	 16
232	 20	64.0	10.8	 16
233	 20	60.0	8.5	 16
234	 20	73.5	16.9	 16
235	 20	152.8	20.7	 16
236	 20	60.0	13.9	 16
237	 20	77.5	14.2	 16
238	 20	617.3	115.2	 16
239	 20	62.3	9.5	 16
240	 20	61.0	6.5	 16
241	 20	68.5	12.0	 16
242	 20	52.8	10.2	 16
243	 20	75.8	16.9	 16
244	 20	120.0	20.9	 16
245	 20	67.0	12.5	 16
246	 20	94.3	14.6	 16
247	 20	57.0	12.4	 16
248	 20	786.0	138.8	 16
249	 20	67.3	11.5	 16
250	 20	63.0	10.8	 16
251	 20	61.0	13.9	 16
252	 20	65.3	9.2	 16
253	 20	64.5	13.9	 16
254	 20	64.5	11.0	 16
255	 20	67.3	15.0	 16
256	 20	58.3	9.1	 16
257	 20	56.0	10.3	 16
258	 20	58.3	11.0	 16
259	 20	117.0	12.6	 16
260	 20	113.3	22.1	 16
261	 20	273.5	28.4	 16
262	 20	235.0	40.7	 16
263	 20	54.0	9.5	 16
264	 20	91.5	13.9	 16
265	 20	99.8	17.3	 16
266	 20	145.0	17.2	 16
267	 20	129.5	20.0	 16
268	 20	116.0	21.1	 16
269	 20	84.0	13.6	 16
270	 20	144.0	27.2	 16
271	 20	536.3	79.6	 16
272	 20	754.8	96.5	 16
273	 20	62.8	12.8	 16
274	 20	85.3	21.8	 16
275	 20	124.5	22.7	 16
276	 20	133.8	21.7	 16
277	 20	58.0	17.5	 16
278	 20	67.3	12.1	 16
279	 20	74.3	13.4	 16
280	 20	96.3	15.6	 16
281	 20	67.3	10.4	 16
282	 20	56.0	11.9	 16
283	 20	73.3	14.8	 16
284	 20	62.3	15.8	 16
285	 20	81.5	16.5	 16
286	 20	60.0	11.6	 16
287	 20	105.3	13.8	 16
288	 20	71.0	12.6	 16
289	 20	89.5	16.1	 16
290	 20	210.3	21.9	 16
291	 20	124.3	18.6	 16
292	 20	74.8	11.3	 16
293	 20	99.0	13.6	 16
294	 20	129.5	33.1	 16
295	 20	69.0	12.8	 16
296	 20	77.8	21.0	 16
297	 20	57.0	10.3	 16
298	 20	80.3	12.0	 16
299	 20	77.3	14.9	 16
300	 20	70.3	11.7	 16
301	 20	64.8	12.9	 16
302	 20	83.0	11.6	 16
303	 20	232.0	23.3	 16
304	 20	193.3	26.8	 16
305	 20	136.0	24.6	 16
306	 20	117.5	16.4	 16
307	 20	83.3	11.2	 16
308	 20	70.5	7.3	 16
309	 20	81.8	16.1	 16
310	 20	78.5	13.3	 16
311	 20	53.3	12.1	 16
312	 20	190.3	30.8	 16
313	 20	60.3	13.0	 16
314	 20	89.3	16.2	 16
315	 20	72.3	10.1	 16
316	 20	57.8	12.2	 16
317	 20	91.8	20.6	 16
318	 20	94.3	14.0	 16
319	 20	68.8	12.5	 16
320	 20	126.0	21.9	 16
321	 20	672.5	104.7	 16
322	 20	162.0	21.9	 16
323	 20	158.3	35.5	 20
324	 20	141.3	29.7	 16
325	 20	60.5	11.7	 16
326	 20	147.0	27.4	 16
327	 20	64.5	10.6	 16
328	 20	50.8	9.7	 16
329	 20	49.3	8.2	 16
330	 20	70.5	11.2	 16
331	 20	74.5	18.9	 16
332	 20	54.3	10.3	 16
333	 20	128.3	30.9	 16
334	 20	159.0	62.5	 16
335	 20	793.0	165.0	 16
336	 20	61.0	13.3	 16
337	 20	48.0	9.0	 16
338	 20	106.5	20.6	 16
339	 20	74.5	10.2	 16
340	 20	96.5	19.1	 16
341	 20	53.3	10.8	 16
342	 20	51.5	9.7	 16
343	 20	55.3	10.4	 16
344	 20	72.0	13.9	 16
345	 20	55.3	6.6	 16
346	 20	61.8	13.1	 16
347	 20	62.0	8.6	 16
348	 20	167.5	23.5	 16
349	 20	77.8	16.6	 16
350	 20	60.3	16.1	 16
351	 20	73.3	13.5	 16
352	 20	71.8	10.5	 16
353	 20	83.5	16.2	 16
354	 20	70.8	10.2	 16
355	 20	98.8	14.8	 16
356	 20	130.3	24.1	 16
357	 20	239.3	36.7	 16
358	 20	775.3	136.9	 16
359	 20	330.3	28.0	 16
360	 20	82.3	12.8	 16
361	 20	107.0	15.5	 16
362	 20	61.8	10.1	 16
363	 20	58.8	13.8	 16
364	 20	122.3	20.3	 16
365	 20	140.5	16.6	 16
366	 20	773.8	101.0	 16
367	 20	114.0	16.9	 16
368	 20	59.3	9.5	 16
369	 20	208.5	27.2	 16
370	 20	66.0	12.1	 16
371	 20	94.3	17.9	 16
372	 20	68.5	12.3	 16
373	 20	68.0	12.3	 16
374	 20	68.8	16.7	 16
375	 20	57.0	10.7	 16
376	 20	67.3	10.6	 16
377	 20	127.0	36.7	 16
378	 20	66.3	11.8	 16
379	 20	59.0	12.3	 16
380	 20	336.8	49.5	 16
381	 20	90.8	14.3	 16
382	 20	54.0	12.9	 16
383	 20	148.8	24.0	 16
384	 20	102.0	17.9	 16
385	 20	74.3	10.6	 16
386	 20	74.5	15.8	 16
387	 20	121.3	14.8	 16
388	 20	68.5	20.1	 16
389	 20	66.5	16.4	 16
390	 20	66.3	11.1	 16
391	 20	65.8	12.0	 16
392	 20	94.5	14.4	 16
393	 20	69.8	11.4	 16
394	 20	61.5	12.9	 16
395	 20	402.0	33.9	 16
396	 20	76.5	17.3	 16
397	 20	59.0	11.3	 16
398	 20	63.0	13.1	 16
399	 20	208.8	34.1	 16
400	 20	265.5	43.5	 16
401	 20	65.0	9.4	 16
402	 20	88.3	20.9	 16
403	 20	76.3	14.9	 16
404	 20	63.0	8.6	 16
405	 20	60.0	11.1	 16
406	 20	53.0	9.8	 16
407	 20	88.3	12.1	 16
408	 20	624.8	70.0	 16
409	 20	2559.0	337.9	 16
410	 20	71.0	17.5	 16
411	 20	106.0	25.7	 16
412	 20	400.0	39.8	 16
413	 20	88.5	9.8	 16
414	 20	171.8	23.2	 16
415	 20	83.8	12.5	 16
416	 20	122.8	21.7	 16
417	 20	96.0	23.9	 16
418	 20	132.0	26.6	 16
419	 20	60.0	9.3	 16
420	 20	229.8	22.4	 16
421	 20	58.5	9.8	 16
422	 20	57.0	10.3	 16
423	 20	238.0	35.2	 16
424	 20	287.3	37.3	 16
425	 20	92.8	15.5	 16
426	 20	90.5	14.8	 16
427	 20	154.8	21.6	 16
428	 20	225.8	28.1	 16
429	 20	149.8	22.3	 16
430	 20	59.5	8.5	 16
431	 20	216.0	24.9	 16
432	 20	121.5	15.5	 16
433	 20	102.8	13.6	 16
434	 20	453.5	37.4	 16
435	 20	66.0	11.5	 16
436	 20	100.8	17.6	 16
437	 20	110.0	16.4	 16
438	 20	68.0	13.9	 16
439	 20	56.3	8.9	 16
440	 20	67.5	10.5	 16
441	 20	96.5	13.8	 16
442	 20	139.5	24.6	 20
443	 20	89.0	21.9	 16
444	 20	246.8	41.2	 16
445	 20	191.8	32.0	 16
446	 20	176.5	26.6	 16
447	 20	77.3	14.4	 16
448	 20	76.3	11.1	 16
449	 20	98.5	17.8	 16
450	 20	69.0	14.4	 16
451	 20	70.8	12.6	 16
452	 20	70.0	11.7	 16
453	 20	58.8	10.3	 16
454	 20	46.0	7.2	 16
455	 20	60.0	11.7	 16
456	 20	84.3	14.2	 16
457	 20	69.0	14.0	 16
458	 20	99.3	19.9	 16
459	 20	56.3	9.5	 16
460	 20	62.8	10.2	 16
461	 20	47.3	8.9	 16
462	 20	77.0	12.9	 16
463	 20	122.5	40.4	 16
464	 20	60.5	11.2	 16
465	 20	53.3	10.1	 16
466	 20	45.0	7.5	 16
467	 20	51.8	11.8	 16
468	 20	145.8	20.6	 16
469	 20	68.0	9.5	 16
470	 20	230.0	25.1	 16
471	 20	586.3	76.3	 16
472	 20	64.8	12.2	 16
473	 20	78.5	11.0	 16
474	 20	62.0	12.9	 16
475	 20	73.3	16.1	 16
476	 20	96.0	17.6	 16
477	 20	60.8	10.6	 16
478	 20	79.8	14.6	 16
479	 20	64.0	11.3	 16
480	 20	295.5	48.2	 16
481	 20	65.3	13.1	 16
482	 20	62.3	10.9	 16
483	 20	52.3	10.3	 16
484	 20	63.8	9.5	 16
485	 20	520.5	89.3	 16
486	 20	505.8	68.6	 16
487	 20	452.0	31.7	 16
488	 20	699.8	99.2	 16
489	 20	192.0	43.0	 16
490	 20	70.5	13.7	 16
491	 20	216.5	38.7	 16
492	 20	84.0	14.8	 16
493	 20	112.3	25.1	 16
494	 20	149.3	29.6	 16
495	 20	68.8	10.9	 16
496	 20	270.5	56.5	 16
497	 20	71.5	13.2	 16
498	 20	157.0	23.7	 16
499	 20	57.3	8.4	 16
500	 20	62.3	13.5	 16
501	 20	76.0	17.4	 16
502	 20	67.0	10.0	 16
503	 20	96.3	17.8	 16
504	 20	134.3	12.7	 16
505	 20	74.8	12.4	 16
506	 20	80.8	12.4	 16
507	 20	199.8	34.6	 16
508	 20	80.0	16.9	 16
509	 20	292.8	42.6	 16
510	 20	83.3	15.4	 16
511	 20	197.5	38.1	 16
512	 20	58.0	8.9	 16
513	 20	64.3	11.6	 16
514	 20	63.5	8.8	 16
515	 20	59.8	18.1	 16
516	 20	74.8	15.1	 16
517	 20	103.0	19.8	 16
518	 20	51.5	9.0	 16
519	 20	59.0	11.1	 16
520	 20	57.0	10.6	 16
521	 20	56.5	12.2	 16
522	 20	62.5	11.0	 16
523	 20	197.5	29.2	 16
524	 20	55.3	11.6	 16
525	 20	83.5	21.4	 16
526	 20	78.3	15.7	 16
527	 20	83.8	14.5	 16
528	 20	181.3	26.3	 16
529	 20	566.0	64.9	 16
530	 20	103.5	17.0	 16
531	 20	357.5	59.9	 16
532	 20	114.5	19.2	 16
533	 20	78.3	17.1	 16
534	 20	65.3	9.2	 16
535	 20	62.0	8.5	 16
536	 20	71.0	15.6	 16
537	 20	104.3	15.3	 16
538	 20	67.0	12.4	 16
539	 20	87.3	20.8	 16
540	 20	104.0	22.6	 16
541	 20	75.0	16.2	 16
542	 20	90.8	12.2	 16
543	 20	136.5	19.5	 16
544	 20	70.0	12.0	 16
545	 20	77.3	16.7	 16
546	 20	77.5	10.4	 16
547	 20	75.5	10.1	 16
548	 20	78.3	14.1	 16
549	 20	128.5	24.4	 16
550	 20	82.3	17.3	 16
551	 20	80.3	15.3	 16
552	 20	59.8	10.6	 16
553	 20	137.5	20.5	 16
554	 20	70.3	10.7	 16
555	 20	66.3	10.3	 16
556	 20	95.3	14.1	 16
557	 20	141.8	22.8	 16
558	 20	60.0	13.4	 16
559	 20	270.3	49.8	 16
560	 20	130.0	13.0	 16
561	 20	64.5	17.2	 20
562	 20	126.5	17.2	 16
563	 20	72.8	9.3	 16
564	 20	85.5	24.5	 16
565	 20	54.5	7.6	 16
566	 20	139.3	25.8	 16
567	 20	62.3	11.4	 16
568	 20	552.0	100.2	 16
569	 20	82.8	17.6	 16
570	 20	59.0	12.1	 16
571	 20	137.5	30.6	 16
572	 20	76.3	11.4	 16
573	 20	79.3	13.5	 16
574	 20	95.3	14.2	 16
575	 20	85.3	12.1	 16
576	 20	269.3	51.1	 16
577	 20	63.5	10.4	 16
578	 20	91.3	12.8	 16
579	 20	170.0	29.7	 16
580	 20	581.3	55.5	 16
581	 20	597.3	79.0	 16
582	 20	105.0	15.7	 16
583	 20	105.5	14.8	 16
584	 20	83.0	12.2	 16
585	 20	88.3	14.9	 16
586	 20	449.0	56.3	 16
587	 20	242.5	32.7	 16
588	 20	77.5	13.3	 16
589	 20	59.8	12.0	 16
590	 20	284.0	32.5	 16
591	 20	104.8	17.1	 16
592	 20	143.5	18.9	 16
593	 20	93.3	15.6	 16
594	 20	62.5	12.0	 16
595	 20	106.0	19.2	 16
596	 20	88.0	18.7	 16
597	 20	367.0	54.7	 16
598	 20	70.8	11.0	 16
599	 20	148.3	19.5	 16
600	 20	184.5	26.9	 16
601	 20	146.3	13.5	 16
602	 20	600.8	61.2	 16
603	 20	195.0	31.8	 16
604	 20	91.3	50.4	 16
605	 20	92.5	20.4	 16
606	 20	131.0	23.5	 16
607	 20	284.0	30.8	 16
608	 20	602.0	48.0	 12
609	 20	114.5	14.7	 16
610	 20	70.8	10.9	 16
611	 20	61.0	13.6	 16
612	 20	60.5	10.5	 16
613	 20	49.3	7.5	 16
614	 20	62.3	8.8	 16
615	 20	228.3	39.9	 16
616	 20	307.3	30.7	 16
617	 20	244.3	44.0	 16
618	 20	144.3	23.2	 16
619	 20	66.0	15.5	 16
620	 20	59.0	12.0	 16
621	 20	55.5	11.1	 16
622	 20	106.8	17.6	 16
623	 20	81.5	15.4	 16
624	 20	58.5	13.8	 16
625	 20	96.8	19.8	 16
626	 20	81.3	15.1	 16
627	 20	63.3	10.5	 16
628	 20	55.3	10.3	 16
629	 20	137.0	19.1	 16
630	 20	73.0	11.1	 16
631	 20	148.8	16.1	 16
632	 20	157.5	21.2	 16
633	 20	107.5	12.7	 16
634	 20	115.5	18.7	 16
635	 20	112.0	15.8	 16
636	 20	306.3	31.3	 16
637	 20	66.8	9.3	 16
638	 20	74.8	11.5	 16
639	 20	125.5	20.4	 16
640	 20	189.5	34.4	 16
641	 20	2058.5	128.0	 16
642	 20	682.3	51.5	 16
643	 20	624.3	44.0	 16
644	 20	747.3	59.1	 16
645	 20	167.5	27.7	 16
646	 20	132.0	16.0	 16
647	 20	222.0	27.8	 16
648	 20	560.0	46.9	 16
649	 20	223.8	39.1	 16
650	 20	184.5	25.2	 16
651	 20	440.3	60.3	 16
652	 20	170.8	22.2	 16
653	 20	86.3	16.9	 16
654	 20	128.8	24.7	 16
655	 20	93.3	21.3	 16
656	 20	79.0	13.0	 16
657	 20	98.3	15.0	 16
658	 20	93.0	14.4	 16
659	 20	76.0	15.8	 16
660	 20	69.5	12.7	 16
661	 20	95.3	17.7	 16
662	 20	74.5	11.2	 16
663	 20	60.5	13.5	 16
664	 20	60.3	10.5	 16
665	 20	51.3	11.4	 16
666	 20	203.5	28.1	 16
667	 20	91.0	14.8	 16
668	 20	49.8	7.6	 16
669	 20	168.3	21.8	 16
670	 20	64.3	10.0	 16
671	 20	418.0	34.2	 16
672	 20	73.8	14.2	 16
673	 20	55.3	10.1	 16
674	 20	52.8	12.7	 16
675	 20	71.5	13.1	 16
676	 20	121.0	14.4	 16
677	 20	76.0	9.3	 16
678	 20	67.5	11.1	 16
679	 20	52.3	11.4	 20
680	 20	50.0	11.0	 16
681	 20	61.0	13.7	 16
682	 20	67.3	19.0	 16
683	 20	118.5	18.4	 16
684	 20	79.8	15.7	 16
685	 20	71.8	14.3	 16
686	 20	77.5	13.6	 16
687	 20	64.0	13.1	 16
688	 20	65.5	12.6	 16
689	 20	194.0	31.2	 16
690	 20	99.0	17.7	 16
691	 20	70.5	11.6	 16
692	 20	527.0	77.4	 16
693	 20	513.3	77.8	 16
694	 20	128.8	17.1	 16
695	 20	137.3	22.2	 16
696	 20	124.8	28.3	 16
697	 20	60.0	13.4	 16
698	 20	49.3	10.3	 16
699	 20	48.3	9.8	 16
700	 20	66.0	10.1	 16
701	 20	49.5	11.1	 16
702	 20	46.3	8.2	 16
703	 20	96.0	17.7	 16
704	 20	648.0	86.0	 16
705	 20	64.3	9.1	 16
706	 20	62.8	10.6	 16
707	 20	180.8	21.1	 16
708	 20	126.3	16.1	 16
709	 20	187.0	34.3	 16
710	 20	135.3	20.7	 16
711	 20	7309.3	961.3	 16
  0	 21	103.0	14.5	 16
  1	 21	360.8	46.5	 16
  2	 21	819.3	75.8	 16
  3	 21	114.8	15.7	 16
  4	 21	120.0	19.5	 16
  5	 21	138.5	23.3	 16
  6	 21	93.3	19.2	 16
  7	 21	236.3	31.1	 16
  8	 21	356.8	32.6	 16
  9	 21	126.5	24.3	 16
 10	 21	217.5	22.0	 16
 11	 21	100.0	10.8	 16
 12	 21	239.3	43.5	 16
 13	 21	105.3	19.0	 16
 14	 21	255.3	32.3	 16
 15	 21	2837.3	414.8	 16
 16	 21	105.3	15.2	 16
 17	 21	73.8	11.8	 16
 18	 21	117.0	18.7	 16
 19	 21	266.3	45.6	 16
 20	 21	241.0	36.7	 16
 21	 21	145.3	23.6	 16
 22	 21	304.3	68.8	 16
 23	 21	72.3	9.9	 16
 24	 21	186.0	38.5	 16
 25	 21	392.0	57.7	 16
 26	 21	53.5	7.3	 16
 27	 21	97.3	15.6	 16
 28	 21	69.5	14.8	 16
 29	 21	78.0	18.4	 16
 30	 21	470.0	54.0	 16
 31	 21	401.5	69.6	 16
 32	 21	63.0	10.5	 16
 33	 21	1572.8	389.5	 16
 34	 21	855.0	151.7	 16
 35	 21	58.3	13.2	 16
 36	 21	75.5	17.2	 16
 37	 21	70.5	14.0	 16
 38	 21	183.0	27.4	 16
 39	 21	202.3	34.5	 16
 40	 21	366.3	46.0	 16
 41	 21	212.3	26.4	 16
 42	 21	72.5	15.9	 16
 43	 21	74.3	11.7	 16
 44	 21	75.0	13.5	 16
 45	 21	57.0	12.0	 16
 46	 21	90.0	17.7	 16
 47	 21	153.5	31.4	 16
 48	 21	187.3	33.2	 16
 49	 21	229.5	34.9	 16
 50	 21	68.3	14.0	 16
 51	 21	447.0	47.4	 16
 52	 21	456.5	77.6	 16
 53	 21	64.5	10.9	 16
 54	 21	83.0	15.0	 16
 55	 21	341.3	61.8	 16
 56	 21	375.8	37.0	 16
 57	 21	666.5	81.8	 16
 58	 21	1691.5	260.9	 16
 59	 21	456.5	68.3	 16
 60	 21	80.5	14.9	 16
 61	 21	118.8	23.6	 16
 62	 21	101.8	14.9	 16
 63	 21	497.5	67.9	 16
 64	 21	70.3	10.7	 16
 65	 21	85.8	25.7	 16
 66	 21	104.3	14.8	 16
 67	 21	56.8	11.2	 16
 68	 21	155.8	25.5	 16
 69	 21	381.5	53.9	 16
 70	 21	1745.0	266.1	 16
 71	 21	68.0	10.8	 16
 72	 21	93.0	11.8	 16
 73	 21	5182.5	689.4	 16
 74	 21	1414.5	156.1	 16
 75	 21	454.8	54.9	 16
 76	 21	110.0	13.0	 16
 77	 21	110.0	18.8	 16
 78	 21	139.0	27.3	 16
 79	 21	92.0	19.2	 16
 80	 21	138.8	23.5	 16
 81	 21	99.0	22.4	 16
 82	 21	106.0	11.7	 16
 83	 21	702.8	56.7	 16
 84	 21	2087.8	137.9	 16
 85	 21	96.5	10.0	 16
 86	 21	148.0	20.7	 16
 87	 21	190.0	33.7	 20
 88	 21	184.3	35.2	 16
 89	 21	86.8	10.6	 16
 90	 21	102.3	18.6	 16
 91	 21	242.0	69.0	 16
 92	 21	243.5	24.9	 16
 93	 21	428.8	60.7	 16
 94	 21	1478.8	78.6	 16
 95	 21	1705.5	340.0	 16
 96	 21	124.8	14.6	 16
 97	 21	158.5	36.1	 16
 98	 21	159.3	29.5	 16
 99	 21	57.8	14.4	 16
100	 21	109.0	18.4	 16
101	 21	287.3	38.0	 16
102	 21	93.5	19.4	 16
103	 21	59.8	9.3	 16
104	 21	114.5	7.4	 16
105	 21	150.5	46.8	 16
106	 21	129.0	26.8	 16
107	 21	486.0	75.2	 16
108	 21	70.3	11.2	 16
109	 21	268.8	41.8	 16
110	 21	132.0	30.8	 16
111	 21	81.5	15.1	 16
112	 21	2105.3	426.8	 16
113	 21	83.3	15.9	 16
114	 21	57.0	14.3	 16
115	 21	56.3	11.0	 16
116	 21	157.8	38.4	 16
117	 21	83.5	21.2	 16
118	 21	120.8	19.2	 16
119	 21	77.0	17.0	 16
120	 21	114.0	15.7	 16
121	 21	2259.8	419.5	 16
122	 21	1716.5	310.1	 16
123	 21	166.8	32.1	 16
124	 21	304.0	54.1	 16
125	 21	286.3	59.7	 16
126	 21	117.0	21.7	 16
127	 21	72.5	14.6	 16
128	 21	70.3	13.0	 16
129	 21	141.5	20.3	 16
130	 21	108.8	15.5	 16
131	 21	76.0	12.9	 16
132	 21	168.5	31.3	 16
133	 21	378.3	41.9	 16
134	 21	132.0	15.4	 16
135	 21	100.3	18.5	 16
136	 21	205.0	31.8	 16
137	 21	254.0	36.0	 16
138	 21	93.5	10.8	 16
139	 21	426.0	65.1	 16
140	 21	120.3	18.3	 16
141	 21	81.5	17.0	 16
142	 21	236.8	48.2	 16
143	 21	68.8	11.2	 16
144	 21	204.0	44.0	 16
145	 21	86.3	15.1	 16
146	 21	69.5	17.3	 16
147	 21	179.8	23.4	 16
148	 21	78.3	13.6	 16
149	 21	159.8	19.6	 16
150	 21	88.5	14.0	 16
151	 21	124.0	18.4	 16
152	 21	723.3	113.3	 16
153	 21	112.3	15.1	 16
154	 21	209.5	30.5	 16
155	 21	179.3	37.0	 16
156	 21	165.5	23.5	 16
157	 21	429.0	56.6	 16
158	 21	135.0	17.6	 16
159	 21	82.3	12.4	 16
160	 21	1109.5	137.9	 16
161	 21	91.0	12.1	 16
162	 21	804.8	94.0	 16
163	 21	95.5	15.9	 16
164	 21	217.5	37.4	 16
165	 21	61.3	11.2	 16
166	 21	60.5	14.8	 16
167	 21	147.5	19.7	 16
168	 21	90.0	11.4	 16
169	 21	195.3	28.7	 16
170	 21	96.8	21.7	 16
171	 21	241.8	26.2	 16
172	 21	261.8	36.3	 16
173	 21	194.3	21.1	 16
174	 21	86.3	14.2	 16
175	 21	154.3	27.2	 16
176	 21	111.3	22.7	 16
177	 21	84.8	18.6	 16
178	 21	102.5	15.3	 16
179	 21	390.0	54.4	 16
180	 21	213.3	22.0	 16
181	 21	64.8	13.3	 16
182	 21	189.8	30.4	 16
183	 21	53.0	7.2	 16
184	 21	86.0	18.2	 16
185	 21	60.3	10.8	 16
186	 21	51.5	9.0	 16
187	 21	66.8	12.8	 16
188	 21	53.0	11.1	 16
189	 21	1007.3	147.9	 16
190	 21	163.0	28.7	 16
191	 21	529.3	51.4	 16
192	 21	118.3	20.1	 16
193	 21	113.0	19.4	 16
194	 21	240.5	38.4	 16
195	 21	51.5	11.4	 16
196	 21	538.5	50.3	 16
197	 21	57.3	9.1	 16
198	 21	88.5	14.3	 16
199	 21	269.5	37.3	 16
200	 21	245.8	27.0	 16
201	 21	117.3	23.6	 16
202	 21	72.3	13.6	 16
203	 21	197.3	26.3	 16
204	 21	57.3	15.0	 16
205	 21	104.8	17.4	 16
206	 21	88.0	13.2	 20
207	 21	65.0	15.2	 16
208	 21	238.8	50.2	 16
209	 21	75.3	8.9	 16
210	 21	89.0	17.1	 16
211	 21	52.0	10.3	 16
212	 21	62.0	13.6	 16
213	 21	69.8	9.6	 16
214	 21	91.8	15.5	 16
215	 21	223.3	43.1	 16
216	 21	98.3	13.5	 16
217	 21	72.8	13.1	 16
218	 21	265.8	51.8	 16
219	 21	164.3	27.3	 16
220	 21	300.0	47.5	 16
221	 21	202.3	33.7	 16
222	 21	67.8	14.5	 16
223	 21	61.3	9.8	 16
224	 21	234.5	46.0	 16
225	 21	64.3	11.3	 16
226	 21	61.3	11.3	 16
227	 21	1514.0	331.6	 16
228	 21	77.0	16.0	 16
229	 21	498.3	73.2	 16
230	 21	686.0	127.3	 16
231	 21	510.3	98.5	 16
232	 21	575.3	107.5	 16
233	 21	71.5	14.8	 16
234	 21	140.0	28.5	 16
235	 21	277.3	52.4	 16
236	 21	56.5	11.3	 16
237	 21	70.0	14.5	 16
238	 21	54.3	9.3	 16
239	 21	134.0	25.6	 16
240	 21	92.3	13.5	 16
241	 21	124.3	15.4	 16
242	 21	65.5	9.3	 16
243	 21	885.0	136.4	 16
244	 21	103.8	24.7	 16
245	 21	320.3	49.6	 16
246	 21	872.0	161.9	 16
247	 21	141.5	55.4	 16
248	 21	179.8	27.7	 16
249	 21	186.5	18.5	 16
250	 21	64.3	11.6	 16
251	 21	62.5	11.3	 16
252	 21	59.3	9.2	 16
253	 21	55.0	10.7	 16
254	 21	55.5	11.4	 16
255	 21	109.3	19.2	 16
256	 21	106.3	14.8	 16
257	 21	229.0	38.4	 16
258	 21	136.0	14.8	 16
259	 21	94.3	12.8	 16
260	 21	72.3	13.2	 16
261	 21	74.3	15.1	 16
262	 21	977.5	92.4	 16
263	 21	5106.0	855.3	 16
264	 21	54.3	8.1	 16
265	 21	73.8	11.6	 16
266	 21	167.5	19.3	 16
267	 21	118.5	13.9	 16
268	 21	84.0	17.3	 16
269	 21	311.8	29.9	 16
270	 21	540.5	97.4	 16
271	 21	63.3	10.0	 16
272	 21	67.0	15.7	 16
273	 21	56.8	12.4	 12
274	 21	126.5	16.1	 16
275	 21	560.3	92.1	 16
276	 21	235.5	31.5	 16
277	 21	75.8	11.8	 16
278	 21	155.8	31.5	 16
279	 21	323.3	43.4	 16
280	 21	101.3	19.7	 16
281	 21	186.3	26.5	 16
282	 21	63.0	9.9	 16
283	 21	259.3	42.9	 16
284	 21	53.3	8.9	 16
285	 21	54.5	12.1	 16
286	 21	110.0	21.5	 16
287	 21	208.0	24.6	 16
288	 21	732.0	74.5	 16
289	 21	104.8	13.0	 16
290	 21	113.0	19.5	 16
291	 21	154.3	27.8	 16
292	 21	88.0	18.4	 16
293	 21	287.0	50.8	 16
294	 21	405.5	49.4	 16
295	 21	72.3	12.5	 16
296	 21	130.8	16.4	 16
297	 21	64.3	15.1	 16
298	 21	69.8	16.4	 16
299	 21	107.8	17.2	 16
300	 21	101.3	19.5	 16
301	 21	104.3	16.1	 16
302	 21	287.5	27.8	 16
303	 21	606.8	77.5	 16
304	 21	479.8	73.2	 16
305	 21	2162.8	328.7	 16
306	 21	146.3	20.9	 16
307	 21	64.8	12.6	 16
308	 21	55.3	8.9	 16
309	 21	133.3	11.8	 16
310	 21	134.5	24.1	 16
311	 21	304.0	62.4	 16
312	 21	67.5	21.0	 16
313	 21	308.0	63.3	 16
314	 21	66.5	11.1	 16
315	 21	59.0	9.0	 16
316	 21	76.3	12.0	 16
317	 21	515.3	82.7	 16
318	 21	1757.5	229.5	 16
319	 21	72.5	19.9	 16
320	 21	132.3	16.8	 16
321	 21	1551.5	158.0	 16
322	 21	4427.3	466.5	 16
323	 21	819.3	98.2	 16
324	 21	66.3	15.3	 16
325	 21	100.5	18.5	 20
326	 21	345.0	121.1	 16
327	 21	126.5	27.1	 16
328	 21	66.0	11.9	 16
329	 21	268.3	81.6	 16
330	 21	51.3	9.6	 16
331	 21	117.0	21.8	 16
332	 21	379.5	100.7	 16
333	 21	233.3	33.5	 16
334	 21	201.5	31.4	 16
335	 21	255.0	45.9	 16
336	 21	58.8	12.1	 16
337	 21	127.5	19.9	 16
338	 21	127.8	26.1	 16
339	 21	69.3	10.9	 16
340	 21	269.8	43.0	 16
341	 21	1475.8	372.2	 16
342	 21	74.8	16.2	 16
343	 21	79.0	14.5	 16
344	 21	127.3	23.0	 16
345	 21	70.3	16.5	 16
346	 21	115.3	22.2	 16
347	 21	94.0	18.2	 16
348	 21	1685.0	127.7	 16
349	 21	1876.3	342.8	 16
350	 21	193.3	44.1	 16
351	 21	178.3	21.4	 16
352	 21	137.8	27.6	 16
353	 21	143.0	28.4	 16
354	 21	82.0	14.6	 16
355	 21	5046.3	1031.8	 16
356	 21	181.0	23.1	 16
357	 21	679.5	91.0	 16
358	 21	223.5	25.8	 16
359	 21	633.5	63.6	 16
360	 21	448.5	53.5	 16
361	 21	646.8	80.2	 16
362	 21	57.0	12.5	 16
363	 21	182.0	32.0	 16
364	 21	60.3	11.5	 16
365	 21	122.5	17.8	 16
366	 21	344.8	60.8	 16
367	 21	425.3	65.8	 16
368	 21	103.3	14.0	 16
369	 21	466.5	69.8	 16
370	 21	186.0	19.8	 16
371	 21	247.0	27.7	 16
372	 21	181.0	24.5	 16
373	 21	64.0	10.6	 16
374	 21	96.0	12.8	 16
375	 21	241.3	33.3	 16
376	 21	76.8	14.8	 16
377	 21	81.0	14.9	 16
378	 21	110.8	14.5	 16
379	 21	69.8	16.0	 16
380	 21	71.5	10.6	 16
381	 21	58.3	10.2	 16
382	 21	108.0	14.1	 16
383	 21	107.0	18.4	 16
384	 21	57.3	11.0	 16
385	 21	73.3	12.5	 16
386	 21	68.3	15.3	 16
387	 21	131.0	27.4	 16
388	 21	79.3	15.9	 16
389	 21	116.5	25.6	 16
390	 21	60.0	10.9	 16
391	 21	49.5	7.5	 16
392	 21	1013.0	99.4	 16
393	 21	1317.3	188.7	 16
394	 21	74.5	15.0	 16
395	 21	104.3	21.9	 16
396	 21	689.0	109.6	 16
397	 21	5247.8	706.5	 16
398	 21	167.5	21.3	 16
399	 21	131.0	13.7	 16
400	 21	245.3	33.1	 16
401	 21	101.0	9.9	 16
402	 21	67.5	9.9	 16
403	 21	186.5	21.4	 16
404	 21	125.3	17.5	 16
405	 21	70.0	12.1	 16
406	 21	485.5	50.4	 16
407	 21	245.8	31.4	 16
408	 21	99.5	14.4	 16
409	 21	60.5	11.6	 16
410	 21	59.3	11.6	 16
411	 21	61.3	10.3	 16
412	 21	1654.3	144.2	 16
413	 21	91.0	12.2	 16
414	 21	779.8	108.8	 16
415	 21	180.3	21.9	 16
416	 21	146.0	23.9	 16
417	 21	86.3	12.3	 16
418	 21	531.3	33.3	 16
419	 21	578.3	52.4	 16
420	 21	66.3	10.3	 16
421	 21	141.8	18.3	 16
422	 21	110.3	16.0	 16
423	 21	127.0	16.1	 16
424	 21	789.8	40.3	 16
425	 21	204.3	28.7	 16
426	 21	164.8	24.6	 16
427	 21	128.3	19.6	 16
428	 21	135.3	18.5	 16
429	 21	115.8	16.0	 16
430	 21	250.3	25.4	 16
431	 21	106.8	17.6	 16
432	 21	198.8	21.0	 16
433	 21	270.3	32.1	 16
434	 21	245.8	26.4	 16
435	 21	247.5	36.7	 16
436	 21	85.5	16.1	 16
437	 21	108.3	16.0	 16
438	 21	651.3	79.3	 16
439	 21	88.5	14.4	 16
440	 21	118.3	21.9	 16
441	 21	151.3	21.0	 16
442	 21	96.8	15.1	 16
443	 21	78.5	15.4	 20
444	 21	97.8	17.2	 16
445	 21	62.3	9.4	 16
446	 21	107.5	18.6	 16
447	 21	123.8	12.4	 16
448	 21	219.0	27.1	 16
449	 21	3869.3	1034.5	 16
450	 21	205.5	28.0	 16
451	 21	184.5	31.1	 16
452	 21	137.0	32.0	 16
453	 21	76.3	16.2	 16
454	 21	190.5	46.3	 16
455	 21	83.3	12.2	 16
456	 21	194.5	38.1	 16
457	 21	96.5	15.9	 16
458	 21	329.5	54.6	 16
459	 21	136.3	21.3	 16
460	 21	482.0	108.5	 16
461	 21	197.5	31.5	 16
462	 21	463.3	105.4	 16
463	 21	671.5	167.6	 16
464	 21	105.3	20.4	 16
465	 21	163.0	28.9	 16
466	 21	231.8	40.1	 16
467	 21	441.8	94.2	 16
468	 21	172.0	34.3	 16
469	 21	117.5	23.4	 16
470	 21	110.3	12.9	 16
471	 21	113.5	22.0	 16
472	 21	66.3	10.5	 16
473	 21	264.0	43.7	 16
474	 21	75.3	15.7	 16
475	 21	68.5	8.6	 16
476	 21	459.0	50.6	 16
477	 21	1138.0	190.0	 16
478	 21	277.5	60.6	 16
479	 21	102.3	16.4	 16
480	 21	69.5	9.9	 16
481	 21	60.5	9.2	 16
482	 21	80.3	13.6	 16
483	 21	93.0	20.9	 16
484	 21	54.8	14.0	 16
485	 21	95.3	22.1	 16
486	 21	101.5	18.8	 16
487	 21	304.0	22.8	 16
488	 21	100.0	14.7	 16
489	 21	77.8	10.8	 16
490	 21	367.5	66.9	 16
491	 21	400.5	40.7	 16
492	 21	252.8	36.6	 16
493	 21	103.0	17.7	 16
494	 21	179.3	31.3	 16
495	 21	70.5	9.9	 16
496	 21	110.3	16.4	 16
497	 21	56.0	8.5	 16
498	 21	120.5	22.7	 16
499	 21	122.3	13.1	 16
500	 21	154.5	20.3	 16
501	 21	422.8	93.6	 16
502	 21	192.3	28.3	 16
503	 21	114.3	18.2	 16
504	 21	123.8	17.5	 16
505	 21	1004.8	210.3	 16
506	 21	62.3	8.8	 16
507	 21	669.0	136.1	 16
508	 21	140.5	19.5	 16
509	 21	78.3	13.0	 16
510	 21	80.3	13.0	 16
511	 21	3996.5	607.8	 16
512	 21	74.8	11.9	 16
513	 21	55.3	7.8	 16
514	 21	65.5	9.1	 16
515	 21	385.8	68.5	 16
516	 21	397.3	73.7	 16
517	 21	75.3	10.5	 16
518	 21	217.0	34.6	 16
519	 21	55.5	11.5	 16
520	 21	151.0	20.3	 16
521	 21	396.5	59.0	 16
522	 21	405.3	64.4	 16
523	 21	138.3	32.7	 16
524	 21	53.3	7.2	 16
525	 21	80.0	15.6	 16
526	 21	56.3	14.3	 16
527	 21	254.0	39.0	 16
528	 21	276.5	29.5	 16
529	 21	349.0	44.2	 16
530	 21	223.0	23.6	 16
531	 21	85.0	16.2	 16
532	 21	914.3	98.2	 16
533	 21	72.0	14.3	 16
534	 21	77.3	12.0	 16
535	 21	343.8	41.7	 16
536	 21	87.3	16.0	 16
537	 21	184.0	33.2	 16
538	 21	59.0	10.2	 16
539	 21	77.0	11.1	 16
540	 21	61.0	8.0	 16
541	 21	98.0	20.4	 16
542	 21	62.8	13.1	 16
543	 21	500.3	47.4	 16
544	 21	131.8	18.5	 16
545	 21	978.3	71.9	 16
546	 21	1075.5	82.3	 16
547	 21	100.0	17.6	 16
548	 21	168.5	25.4	 16
549	 21	94.5	14.5	 16
550	 21	133.5	28.7	 16
551	 21	109.3	16.6	 16
552	 21	188.3	25.2	 16
553	 21	91.3	13.4	 16
554	 21	56.3	10.4	 16
555	 21	70.3	17.1	 16
556	 21	56.3	10.0	 16
557	 21	76.5	17.7	 16
558	 21	64.0	12.8	 16
559	 21	60.5	11.5	 16
560	 21	109.0	17.8	 16
561	 21	147.0	17.9	 16
562	 21	171.3	14.0	 20
563	 21	274.3	28.3	 16
564	 21	266.0	49.8	 16
565	 21	70.3	7.7	 16
566	 21	270.3	52.0	 16
567	 21	55.5	9.1	 16
568	 21	521.0	105.6	 16
569	 21	156.5	29.6	 16
570	 21	57.3	9.3	 16
571	 21	102.3	19.1	 16
572	 21	104.3	29.2	 16
573	 21	79.0	14.6	 16
574	 21	342.8	54.1	 16
575	 21	135.5	23.8	 16
576	 21	224.8	25.2	 16
577	 21	161.3	13.2	 16
578	 21	181.8	26.8	 16
579	 21	201.5	22.5	 16
580	 21	182.3	24.1	 16
581	 21	64.3	10.6	 16
582	 21	77.5	23.4	 16
583	 21	4925.0	475.5	 16
584	 21	91.8	15.8	 16
585	 21	890.5	74.5	 16
586	 21	221.0	28.8	 16
587	 21	68.5	12.8	 16
588	 21	99.3	15.6	 16
589	 21	115.3	20.8	 16
590	 21	135.0	22.5	 16
591	 21	615.5	52.7	 16
592	 21	436.3	60.6	 16
593	 21	168.0	28.1	 16
594	 21	93.5	12.4	 16
595	 21	92.0	14.3	 16
596	 21	138.8	18.4	 16
597	 21	66.3	11.0	 16
598	 21	129.3	27.2	 16
599	 21	286.3	36.5	 16
600	 21	96.0	18.0	 16
601	 21	88.0	20.2	 16
602	 21	504.3	64.2	 16
603	 21	164.3	27.5	 16
604	 21	106.5	17.6	 16
605	 21	113.5	21.8	 16
606	 21	128.8	30.2	 16
607	 21	164.0	24.7	 16
608	 21	150.0	17.5	 16
609	 21	776.3	112.0	 16
610	 21	101.3	12.6	 16
611	 21	72.5	12.0	 16
612	 21	174.0	19.5	 16
613	 21	341.5	49.6	 16
614	 21	145.8	20.1	 16
615	 21	172.5	35.3	 16
616	 21	326.0	37.8	 16
617	 21	197.3	37.8	 16
618	 21	76.3	16.4	 16
619	 21	456.0	46.1	 16
620	 21	106.5	19.4	 16
621	 21	126.3	20.4	 16
622	 21	63.5	10.1	 16
623	 21	125.0	21.0	 16
624	 21	89.5	14.1	 16
625	 21	97.8	14.4	 16
626	 21	312.8	31.2	 16
627	 21	86.5	14.4	 16
628	 21	90.5	14.9	 16
629	 21	79.3	12.9	 16
630	 21	131.8	22.6	 16
631	 21	113.3	20.8	 16
632	 21	838.5	52.0	 16
633	 21	96.5	14.0	 16
634	 21	90.8	20.2	 16
635	 21	1338.5	82.5	 16
636	 21	110.3	19.4	 16
637	 21	95.3	12.4	 16
638	 21	1435.3	145.0	 16
639	 21	72.5	12.8	 16
640	 21	75.3	15.9	 16
641	 21	381.3	42.2	 16
642	 21	89.3	15.2	 16
643	 21	82.3	15.1	 16
644	 21	77.5	17.8	 16
645	 21	53.5	8.5	 16
646	 21	91.8	19.5	 16
647	 21	104.3	19.0	 16
648	 21	228.8	29.6	 16
649	 21	261.0	29.9	 16
650	 21	128.3	17.7	 16
651	 21	167.3	25.4	 16
652	 21	222.0	32.2	 16
653	 21	357.3	71.1	 16
654	 21	92.0	12.8	 16
655	 21	267.0	41.1	 16
656	 21	4618.5	276.8	 16
657	 21	9328.0	653.0	 16
658	 21	134.3	19.8	 16
659	 21	86.0	13.3	 16
660	 21	436.8	47.9	 16
661	 21	91.0	17.3	 16
662	 21	1416.0	75.9	 16
663	 21	94.3	18.8	 16
664	 21	984.5	81.7	 16
665	 21	53.3	9.4	 16
666	 21	96.8	22.7	 16
667	 21	56.3	10.3	 16
668	 21	102.3	22.9	 16
669	 21	54.0	9.6	 16
670	 21	60.0	13.7	 16
671	 21	970.5	70.9	 16
672	 21	108.0	13.7	 16
673	 21	335.8	47.1	 16
674	 21	476.3	44.6	 16
675	 21	511.8	60.7	 16
676	 21	511.0	46.4	 16
677	 21	104.8	10.8	 16
678	 21	79.0	15.3	 16
679	 21	264.5	31.2	 16
680	 21	69.5	14.6	 16
681	 21	96.0	17.9	 20
682	 21	755.0	151.7	 16
683	 21	56.0	11.8	 16
684	 21	59.0	10.4	 16
685	 21	62.3	15.1	 16
686	 21	81.5	17.4	 16
687	 21	197.3	31.6	 16
688	 21	126.3	16.9	 16
689	 21	1506.5	245.0	 16
690	 21	1159.3	163.8	 16
691	 21	179.0	18.5	 16
692	 21	78.0	19.1	 16
693	 21	438.0	37.0	 16
694	 21	262.3	42.6	 16
695	 21	106.3	17.3	 16
696	 21	155.0	20.3	 16
697	 21	166.0	22.4	 16
698	 21	100.5	18.8	 16
699	 21	47.0	9.7	 16
700	 21	524.0	61.3	 16
701	 21	64.0	9.9	 16
702	 21	65.5	12.1	 16
703	 21	95.3	18.6	 16
704	 21	106.3	19.4	 16
705	 21	173.5	24.3	 16
706	 21	456.0	48.0	 16
707	 21	255.8	37.6	 16
708	 21	134.0	20.7	 16
709	 21	213.0	32.8	 16
710	 21	393.8	48.8	 16
711	 21	95.3	15.2	 16
  0	 22	9221.5	1180.4	 16
  1	 22	367.5	42.5	 16
  2	 22	100.8	17.5	 16
  3	 22	75.8	10.4	 16
  4	 22	127.5	19.1	 16
  5	 22	65.8	17.0	 16
  6	 22	62.8	10.1	 16
  7	 22	161.0	18.5	 16
  8	 22	183.5	23.4	 16
  9	 22	120.8	30.0	 16
 10	 22	249.0	38.1	 16
 11	 22	126.5	16.8	 16
 12	 22	93.0	17.8	 16
 13	 22	62.5	12.2	 16
 14	 22	150.3	18.1	 16
 15	 22	316.5	48.8	 16
 16	 22	71.8	20.1	 16
 17	 22	150.3	18.0	 16
 18	 22	155.0	18.3	 16
 19	 22	100.0	15.0	 16
 20	 22	60.5	10.2	 16
 21	 22	112.3	14.3	 16
 22	 22	152.8	19.9	 16
 23	 22	60.3	9.1	 16
 24	 22	74.0	14.4	 16
 25	 22	103.5	19.2	 16
 26	 22	76.8	41.7	 16
 27	 22	77.3	14.4	 16
 28	 22	69.3	20.0	 16
 29	 22	66.5	12.6	 16
 30	 22	248.3	37.7	 16
 31	 22	212.3	44.3	 16
 32	 22	59.5	10.5	 16
 33	 22	132.8	19.0	 16
 34	 22	113.5	22.7	 16
 35	 22	69.3	15.5	 16
 36	 22	70.0	13.4	 16
 37	 22	65.0	11.3	 16
 38	 22	120.8	16.8	 16
 39	 22	286.3	38.2	 16
 40	 22	144.3	21.5	 16
 41	 22	170.8	20.0	 16
 42	 22	66.3	12.8	 16
 43	 22	72.5	11.0	 16
 44	 22	58.5	11.3	 16
 45	 22	69.3	12.5	 16
 46	 22	77.8	12.5	 16
 47	 22	77.5	14.6	 16
 48	 22	93.3	17.1	 16
 49	 22	81.3	15.3	 16
 50	 22	56.3	10.1	 16
 51	 22	129.3	20.5	 16
 52	 22	127.0	18.8	 16
 53	 22	62.0	14.1	 16
 54	 22	63.5	9.1	 16
 55	 22	63.3	12.2	 16
 56	 22	110.0	18.9	 16
 57	 22	357.8	38.7	 16
 58	 22	158.8	23.7	 16
 59	 22	167.8	42.1	 16
 60	 22	73.3	12.6	 16
 61	 22	75.5	15.1	 16
 62	 22	76.0	15.4	 16
 63	 22	221.3	25.5	 16
 64	 22	100.0	15.1	 16
 65	 22	71.0	12.8	 16
 66	 22	111.3	18.0	 16
 67	 22	66.0	12.4	 16
 68	 22	315.3	56.5	 16
 69	 22	453.5	93.2	 16
 70	 22	1165.5	232.4	 16
 71	 22	66.8	13.2	 16
 72	 22	71.8	13.0	 16
 73	 22	1058.8	209.3	 16
 74	 22	200.0	31.6	 16
 75	 22	110.0	23.2	 16
 76	 22	69.3	12.5	 16
 77	 22	73.8	18.6	 16
 78	 22	154.3	25.9	 16
 79	 22	60.3	8.4	 16
 80	 22	99.0	23.7	 16
 81	 22	202.8	20.1	 16
 82	 22	148.8	24.3	 16
 83	 22	196.0	21.1	 16
 84	 22	359.0	51.4	 16
 85	 22	110.5	22.3	 16
 86	 22	87.3	17.6	 16
 87	 22	153.8	18.6	 16
 88	 22	62.0	10.9	 16
 89	 22	136.3	17.4	 20
 90	 22	59.5	12.3	 16
 91	 22	360.5	98.5	 16
 92	 22	367.0	37.4	 16
 93	 22	102.3	16.0	 16
 94	 22	548.3	54.0	 16
 95	 22	592.3	135.2	 16
 96	 22	117.0	18.1	 16
 97	 22	166.0	25.0	 16
 98	 22	73.3	15.9	 16
 99	 22	53.5	7.9	 16
100	 22	76.8	23.1	 16
101	 22	74.3	13.1	 16
102	 22	106.0	20.4	 16
103	 22	56.3	10.3	 16
104	 22	92.5	15.2	 16
105	 22	354.3	63.9	 16
106	 22	254.3	44.8	 16
107	 22	65.5	14.0	 16
108	 22	63.0	10.3	 16
109	 22	206.8	30.9	 16
110	 22	70.0	14.6	 16
111	 22	68.8	16.1	 16
112	 22	233.0	52.9	 16
113	 22	63.8	10.0	 16
114	 22	70.0	14.2	 16
115	 22	64.5	11.4	 16
116	 22	65.3	11.9	 16
117	 22	58.3	7.4	 16
118	 22	65.3	10.8	 16
119	 22	59.0	11.7	 16
120	 22	141.8	21.3	 16
121	 22	294.3	58.7	 16
122	 22	128.3	29.1	 16
123	 22	102.0	15.3	 16
124	 22	91.5	19.4	 16
125	 22	79.3	16.0	 16
126	 22	136.5	26.1	 16
127	 22	59.3	10.8	 16
128	 22	64.0	12.4	 16
129	 22	328.5	44.4	 16
130	 22	86.5	15.2	 16
131	 22	65.8	10.6	 16
132	 22	91.0	14.8	 16
133	 22	191.5	26.4	 16
134	 22	77.3	11.2	 16
135	 22	101.3	15.8	 16
136	 22	111.5	15.9	 16
137	 22	145.8	30.0	 16
138	 22	96.0	14.0	 16
139	 22	117.0	22.9	 16
140	 22	91.5	16.4	 16
141	 22	58.3	10.7	 16
142	 22	81.3	14.4	 16
143	 22	80.5	11.8	 16
144	 22	180.3	26.1	 16
145	 22	92.3	16.1	 16
146	 22	64.0	13.3	 16
147	 22	64.3	9.6	 16
148	 22	66.3	12.6	 16
149	 22	68.5	20.0	 16
150	 22	83.0	10.9	 16
151	 22	80.5	17.0	 16
152	 22	616.3	113.9	 16
153	 22	98.0	17.7	 16
154	 22	67.8	15.5	 16
155	 22	77.3	13.2	 16
156	 22	114.5	17.7	 16
157	 22	91.3	11.0	 16
158	 22	82.8	18.2	 16
159	 22	78.8	16.3	 16
160	 22	396.5	62.3	 16
161	 22	66.3	7.5	 16
162	 22	186.5	28.3	 16
163	 22	55.3	10.7	 16
164	 22	66.8	12.2	 16
165	 22	54.5	10.1	 16
166	 22	62.5	10.4	 16
167	 22	156.5	13.6	 16
168	 22	88.3	10.8	 16
169	 22	54.3	10.4	 16
170	 22	63.5	8.2	 16
171	 22	149.8	24.0	 16
172	 22	107.3	13.6	 16
173	 22	176.5	19.9	 16
174	 22	114.8	24.6	 16
175	 22	73.5	17.1	 16
176	 22	137.0	27.6	 16
177	 22	89.3	16.0	 16
178	 22	98.3	11.6	 16
179	 22	93.5	23.1	 16
180	 22	123.3	26.5	 16
181	 22	70.8	12.8	 16
182	 22	81.8	10.8	 16
183	 22	57.3	12.3	 16
184	 22	54.3	11.5	 16
185	 22	62.0	15.7	 16
186	 22	50.3	7.1	 16
187	 22	51.3	11.4	 16
188	 22	56.5	11.8	 16
189	 22	250.5	43.8	 16
190	 22	68.3	14.2	 16
191	 22	126.3	19.1	 16
192	 22	86.8	16.7	 16
193	 22	85.5	16.4	 16
194	 22	73.3	17.8	 16
195	 22	60.0	14.2	 16
196	 22	159.8	22.3	 16
197	 22	58.3	11.3	 16
198	 22	72.0	15.4	 16
199	 22	312.3	40.7	 16
200	 22	75.5	13.3	 16
201	 22	70.5	14.4	 16
202	 22	54.5	8.3	 16
203	 22	58.3	12.9	 16
204	 22	60.5	12.8	 16
205	 22	65.3	10.1	 16
206	 22	69.5	9.9	 16
207	 22	68.0	14.0	 20
208	 22	104.0	16.0	 16
209	 22	104.8	16.4	 16
210	 22	222.8	39.2	 16
211	 22	57.8	9.1	 16
212	 22	56.3	11.5	 16
213	 22	64.0	14.4	 16
214	 22	55.8	6.4	 16
215	 22	69.5	13.0	 16
216	 22	207.3	46.5	 16
217	 22	68.5	14.1	 16
218	 22	61.0	14.8	 16
219	 22	127.0	23.5	 16
220	 22	116.0	26.2	 16
221	 22	106.3	20.6	 16
222	 22	67.0	12.9	 16
223	 22	55.8	12.0	 16
224	 22	66.5	6.9	 16
225	 22	69.8	11.4	 16
226	 22	64.0	12.7	 16
227	 22	341.3	64.2	 16
228	 22	85.3	8.5	 16
229	 22	272.3	40.0	 16
230	 22	130.3	29.0	 16
231	 22	76.0	11.3	 16
232	 22	85.3	12.4	 16
233	 22	77.8	11.6	 16
234	 22	186.8	27.9	 16
235	 22	155.0	24.9	 16
236	 22	50.8	7.0	 16
237	 22	65.0	11.6	 16
238	 22	54.3	12.3	 16
239	 22	69.3	11.5	 16
240	 22	73.0	15.3	 16
241	 22	96.3	14.1	 16
242	 22	65.0	10.5	 16
243	 22	318.3	55.5	 16
244	 22	119.3	14.7	 16
245	 22	161.3	25.3	 16
246	 22	356.3	70.6	 16
247	 22	71.0	14.5	 16
248	 22	272.0	48.8	 16
249	 22	120.8	16.7	 16
250	 22	61.5	13.2	 16
251	 22	50.5	10.4	 16
252	 22	47.3	10.4	 16
253	 22	55.3	15.4	 16
254	 22	60.0	8.2	 16
255	 22	89.0	12.7	 16
256	 22	105.0	15.7	 16
257	 22	112.8	20.0	 16
258	 22	103.5	17.4	 16
259	 22	74.8	13.9	 16
260	 22	63.5	8.9	 16
261	 22	91.3	19.8	 16
262	 22	403.3	36.4	 16
263	 22	1214.3	211.3	 16
264	 22	55.3	11.1	 16
265	 22	72.3	11.5	 16
266	 22	131.5	16.7	 16
267	 22	198.5	31.8	 16
268	 22	158.5	22.7	 16
269	 22	164.0	23.2	 16
270	 22	110.8	18.9	 16
271	 22	60.3	15.7	 16
272	 22	58.3	8.4	 16
273	 22	62.3	11.5	 16
274	 22	96.5	14.9	 16
275	 22	103.3	22.9	 16
276	 22	95.8	15.9	 16
277	 22	59.3	12.7	 16
278	 22	73.5	12.8	 16
279	 22	68.0	9.6	 16
280	 22	71.5	13.2	 16
281	 22	66.0	13.7	 16
282	 22	61.8	9.7	 16
283	 22	57.5	13.3	 16
284	 22	52.3	11.4	 16
285	 22	65.5	13.2	 16
286	 22	63.0	13.4	 16
287	 22	102.3	21.8	 16
288	 22	244.5	43.6	 16
289	 22	105.0	18.5	 16
290	 22	105.0	12.8	 16
291	 22	119.8	22.0	 16
292	 22	112.3	19.6	 16
293	 22	155.8	26.8	 16
294	 22	145.0	16.6	 16
295	 22	68.3	14.2	 16
296	 22	92.3	17.3	 16
297	 22	53.0	10.8	 16
298	 22	67.8	9.1	 16
299	 22	72.3	14.7	 16
300	 22	67.3	12.7	 16
301	 22	81.3	15.4	 16
302	 22	728.3	45.7	 16
303	 22	246.8	41.1	 16
304	 22	333.3	33.6	 16
305	 22	387.8	57.5	 16
306	 22	95.3	27.8	 16
307	 22	70.3	11.2	 16
308	 22	60.3	12.3	 16
309	 22	111.5	18.4	 16
310	 22	110.0	14.1	 16
311	 22	93.8	14.6	 16
312	 22	73.3	16.8	 16
313	 22	127.0	16.8	 16
314	 22	64.0	12.6	 16
315	 22	55.5	8.8	 16
316	 22	73.5	16.4	 16
317	 22	1501.5	365.2	 16
318	 22	511.3	110.5	 16
319	 22	82.3	12.4	 16
320	 22	88.0	14.7	 16
321	 22	155.0	28.5	 16
322	 22	524.5	102.5	 16
323	 22	98.5	15.2	 16
324	 22	67.3	9.7	 16
325	 22	62.3	10.1	 16
326	 22	64.3	12.1	 20
327	 22	69.5	15.9	 16
328	 22	62.8	16.3	 16
329	 22	56.3	13.7	 16
330	 22	56.5	12.2	 16
331	 22	69.5	10.4	 16
332	 22	152.5	33.7	 16
333	 22	94.0	15.2	 16
334	 22	142.3	53.3	 16
335	 22	771.5	183.7	 16
336	 22	68.5	10.0	 16
337	 22	174.8	52.7	 16
338	 22	342.5	88.1	 16
339	 22	81.3	14.6	 16
340	 22	261.3	49.0	 16
341	 22	254.0	53.6	 16
342	 22	153.0	27.0	 16
343	 22	80.3	17.7	 16
344	 22	77.3	10.1	 16
345	 22	70.0	10.0	 16
346	 22	80.3	12.2	 16
347	 22	96.0	18.8	 16
348	 22	370.8	44.7	 16
349	 22	432.3	105.2	 16
350	 22	78.0	11.3	 16
351	 22	64.5	11.2	 16
352	 22	73.5	18.4	 16
353	 22	86.8	16.9	 16
354	 22	78.3	17.4	 16
355	 22	1187.0	244.6	 16
356	 22	144.5	21.9	 16
357	 22	947.5	208.1	 16
358	 22	256.3	26.9	 16
359	 22	299.5	33.0	 16
360	 22	271.3	37.1	 16
361	 22	144.3	19.9	 16
362	 22	70.5	13.9	 16
363	 22	70.3	11.6	 16
364	 22	69.5	11.8	 16
365	 22	86.5	9.7	 16
366	 22	103.0	19.6	 16
367	 22	131.3	24.7	 16
368	 22	169.0	34.3	 16
369	 22	89.5	9.3	 16
370	 22	115.0	19.2	 16
371	 22	137.8	30.5	 16
372	 22	92.0	15.0	 16
373	 22	66.0	15.7	 16
374	 22	84.3	17.3	 16
375	 22	77.0	11.6	 16
376	 22	98.3	16.6	 16
377	 22	143.0	22.3	 16
378	 22	101.0	14.2	 16
379	 22	69.0	11.8	 16
380	 22	77.5	15.3	 16
381	 22	73.0	16.4	 16
382	 22	56.5	9.7	 16
383	 22	65.5	8.0	 16
384	 22	56.8	13.1	 16
385	 22	65.3	11.0	 16
386	 22	48.3	9.0	 16
387	 22	68.3	13.2	 16
388	 22	84.8	15.3	 16
389	 22	97.3	17.3	 16
390	 22	66.0	14.8	 16
391	 22	56.5	12.2	 16
392	 22	149.8	98.8	 16
393	 22	98.0	17.8	 16
394	 22	55.8	8.3	 16
395	 22	89.0	18.1	 16
396	 22	147.5	24.4	 16
397	 22	219.8	47.8	 16
398	 22	84.5	15.4	 16
399	 22	79.8	14.6	 16
400	 22	84.3	11.8	 16
401	 22	71.5	18.5	 16
402	 22	65.0	8.8	 16
403	 22	88.3	14.1	 16
404	 22	149.0	22.2	 16
405	 22	62.0	11.4	 16
406	 22	155.5	25.6	 16
407	 22	165.8	30.5	 16
408	 22	85.0	14.2	 16
409	 22	58.3	6.9	 16
410	 22	58.5	10.6	 16
411	 22	66.3	9.3	 16
412	 22	411.8	63.4	 16
413	 22	73.8	11.9	 16
414	 22	93.0	12.1	 16
415	 22	73.5	16.0	 16
416	 22	57.8	8.7	 16
417	 22	104.0	18.5	 16
418	 22	93.5	14.2	 16
419	 22	97.0	17.4	 16
420	 22	64.8	8.8	 16
421	 22	198.0	26.4	 16
422	 22	75.3	12.2	 16
423	 22	89.8	14.1	 16
424	 22	435.3	39.6	 16
425	 22	124.5	18.7	 16
426	 22	135.3	19.0	 16
427	 22	122.5	17.3	 16
428	 22	529.8	40.6	 16
429	 22	190.0	21.1	 16
430	 22	147.8	29.7	 16
431	 22	69.5	11.1	 16
432	 22	128.8	17.7	 16
433	 22	401.8	29.2	 16
434	 22	391.3	42.9	 16
435	 22	380.0	29.8	 16
436	 22	86.0	13.0	 16
437	 22	78.0	13.4	 16
438	 22	92.0	17.5	 16
439	 22	67.3	11.0	 16
440	 22	84.3	12.4	 16
441	 22	163.0	24.6	 16
442	 22	88.0	17.3	 16
443	 22	70.8	10.0	 16
444	 22	79.5	14.3	 16
445	 22	51.0	8.1	 20
446	 22	77.3	21.2	 16
447	 22	89.3	13.7	 16
448	 22	233.3	31.3	 16
449	 22	878.8	236.7	 16
450	 22	138.0	31.6	 16
451	 22	204.8	45.8	 16
452	 22	76.3	15.3	 16
453	 22	69.0	13.5	 16
454	 22	79.8	20.9	 16
455	 22	70.8	23.5	 16
456	 22	157.8	28.6	 16
457	 22	132.3	18.5	 16
458	 22	167.5	25.4	 16
459	 22	128.8	15.5	 16
460	 22	142.3	30.5	 16
461	 22	487.5	58.0	 16
462	 22	169.3	24.0	 16
463	 22	156.3	28.9	 16
464	 22	66.3	15.8	 16
465	 22	64.0	14.3	 16
466	 22	80.8	14.1	 16
467	 22	71.5	15.6	 16
468	 22	146.5	30.7	 16
469	 22	85.8	10.9	 16
470	 22	147.0	23.7	 16
471	 22	68.5	15.0	 16
472	 22	100.5	15.2	 16
473	 22	61.8	10.5	 16
474	 22	56.5	13.8	 16
475	 22	56.0	11.9	 16
476	 22	202.5	30.5	 16
477	 22	394.5	63.4	 16
478	 22	94.0	10.3	 16
479	 22	130.0	17.4	 16
480	 22	69.3	7.9	 16
481	 22	50.3	10.4	 16
482	 22	67.3	13.0	 16
483	 22	74.0	17.9	 16
484	 22	58.8	12.1	 16
485	 22	71.5	16.7	 16
486	 22	169.3	23.8	 16
487	 22	280.8	47.4	 16
488	 22	96.3	18.1	 16
489	 22	62.8	9.7	 16
490	 22	204.3	30.3	 16
491	 22	248.8	35.7	 16
492	 22	128.8	28.8	 16
493	 22	84.0	17.6	 16
494	 22	202.0	35.9	 16
495	 22	70.3	15.1	 16
496	 22	165.8	28.1	 16
497	 22	59.0	16.1	 16
498	 22	82.3	15.8	 16
499	 22	99.3	10.3	 16
500	 22	121.8	29.8	 16
501	 22	100.3	15.9	 16
502	 22	180.3	34.1	 16
503	 22	98.3	15.4	 16
504	 22	111.8	17.8	 16
505	 22	381.3	63.9	 16
506	 22	85.3	23.0	 16
507	 22	159.3	30.9	 16
508	 22	73.3	12.6	 16
509	 22	71.8	10.6	 16
510	 22	74.3	14.7	 16
511	 22	380.3	70.0	 16
512	 22	74.5	17.7	 16
513	 22	61.3	11.1	 16
514	 22	62.0	9.5	 16
515	 22	115.3	17.4	 16
516	 22	106.8	15.3	 16
517	 22	61.0	16.9	 16
518	 22	73.8	7.9	 16
519	 22	63.8	13.9	 16
520	 22	74.8	25.9	 16
521	 22	80.0	13.5	 16
522	 22	69.0	10.7	 16
523	 22	95.3	12.7	 16
524	 22	51.0	6.4	 16
525	 22	67.8	12.7	 16
526	 22	64.5	14.6	 16
527	 22	167.0	23.8	 16
528	 22	99.0	16.5	 16
529	 22	222.5	30.8	 16
530	 22	150.0	16.1	 16
531	 22	90.0	12.6	 16
532	 22	168.3	25.0	 16
533	 22	66.8	12.0	 16
534	 22	63.5	12.3	 16
535	 22	110.5	18.0	 16
536	 22	61.3	8.0	 16
537	 22	140.3	18.3	 16
538	 22	68.5	13.4	 16
539	 22	61.5	10.2	 16
540	 22	64.0	9.7	 16
541	 22	59.3	10.3	 16
542	 22	71.3	15.4	 16
543	 22	322.5	34.6	 16
544	 22	205.0	31.2	 16
545	 22	418.0	41.9	 16
546	 22	416.3	29.8	 16
547	 22	73.5	13.6	 16
548	 22	116.0	19.6	 16
549	 22	135.0	19.0	 16
550	 22	109.8	17.0	 16
551	 22	63.3	13.1	 16
552	 22	270.0	37.0	 16
553	 22	73.3	13.8	 16
554	 22	55.8	15.8	 16
555	 22	53.8	7.3	 16
556	 22	54.8	11.5	 16
557	 22	57.0	7.8	 16
558	 22	58.0	8.3	 16
559	 22	74.0	15.1	 16
560	 22	74.3	15.5	 16
561	 22	63.3	9.5	 16
562	 22	161.5	23.6	 16
563	 22	163.5	16.2	 20
564	 22	152.0	24.3	 16
565	 22	48.5	7.3	 16
566	 22	56.3	9.3	 16
567	 22	59.0	12.6	 16
568	 22	75.0	12.8	 16
569	 22	73.3	11.2	 16
570	 22	62.3	14.0	 16
571	 22	60.5	11.4	 16
572	 22	72.5	17.1	 16
573	 22	92.8	19.1	 16
574	 22	82.3	11.3	 16
575	 22	127.0	13.1	 16
576	 22	236.5	33.9	 16
577	 22	112.5	21.7	 16
578	 22	103.8	16.1	 16
579	 22	135.8	24.3	 16
580	 22	174.8	17.2	 16
581	 22	80.3	15.6	 16
582	 22	87.3	11.8	 16
583	 22	776.8	90.4	 16
584	 22	88.8	16.3	 16
585	 22	342.0	51.4	 16
586	 22	119.0	13.3	 16
587	 22	77.3	13.6	 16
588	 22	71.0	12.8	 16
589	 22	103.0	16.4	 16
590	 22	123.3	18.6	 16
591	 22	190.3	13.8	 16
592	 22	619.0	54.6	 16
593	 22	119.8	14.7	 16
594	 22	94.5	23.7	 16
595	 22	86.0	17.3	 16
596	 22	84.5	17.4	 16
597	 22	61.5	15.8	 16
598	 22	80.0	19.0	 16
599	 22	131.3	18.4	 16
600	 22	97.8	16.1	 16
601	 22	76.0	13.0	 16
602	 22	123.5	12.0	 16
603	 22	77.8	13.4	 16
604	 22	83.5	15.3	 16
605	 22	152.8	26.7	 16
606	 22	106.8	17.8	 16
607	 22	305.5	49.5	 16
608	 22	100.5	15.1	 16
609	 22	139.3	13.7	 16
610	 22	97.3	24.7	 16
611	 22	75.3	13.5	 16
612	 22	111.8	16.5	 16
613	 22	182.3	53.3	 16
614	 22	174.0	23.5	 16
615	 22	295.8	69.1	 16
616	 22	488.0	64.6	 16
617	 22	122.0	22.6	 16
618	 22	77.8	18.5	 16
619	 22	109.0	16.9	 16
620	 22	67.8	13.0	 16
621	 22	91.0	19.6	 16
622	 22	66.3	19.5	 16
623	 22	83.3	15.1	 16
624	 22	67.5	11.0	 16
625	 22	73.5	11.1	 16
626	 22	95.8	12.6	 16
627	 22	61.0	10.1	 16
628	 22	70.0	15.7	 16
629	 22	77.5	13.0	 16
630	 22	196.3	22.9	 16
631	 22	355.8	38.1	 16
632	 22	368.0	47.0	 16
633	 22	117.0	17.8	 16
634	 22	52.0	9.2	 16
635	 22	170.5	25.3	 16
636	 22	98.3	12.4	 16
637	 22	78.0	10.9	 16
638	 22	277.0	42.8	 16
639	 22	61.3	11.0	 16
640	 22	85.3	18.1	 16
641	 22	207.3	21.0	 16
642	 22	90.5	17.1	 16
643	 22	72.0	12.2	 16
644	 22	59.8	11.6	 16
645	 22	50.5	9.5	 16
646	 22	69.3	13.1	 16
647	 22	106.0	23.3	 16
648	 22	133.5	27.6	 16
649	 22	148.3	19.4	 16
650	 22	145.5	20.8	 12
651	 22	106.3	15.2	 16
652	 22	148.3	28.4	 16
653	 22	160.8	23.0	 16
654	 22	85.8	7.7	 16
655	 22	134.8	22.2	 16
656	 22	1187.5	205.3	 16
657	 22	1290.0	176.6	 16
658	 22	97.5	15.9	 16
659	 22	72.8	8.8	 16
660	 22	120.8	13.9	 16
661	 22	84.3	13.9	 16
662	 22	433.5	52.0	 16
663	 22	70.3	11.2	 16
664	 22	436.8	48.6	 16
665	 22	49.5	10.0	 16
666	 22	60.3	10.4	 16
667	 22	60.8	9.7	 16
668	 22	50.0	8.7	 16
669	 22	62.8	14.1	 16
670	 22	54.8	11.0	 16
671	 22	316.3	39.1	 16
672	 22	97.0	13.6	 16
673	 22	112.0	22.3	 16
674	 22	182.5	26.4	 16
675	 22	108.0	20.9	 16
676	 22	114.3	18.8	 16
677	 22	109.3	22.2	 16
678	 22	68.3	14.2	 16
679	 22	60.8	13.8	 16
680	 22	49.5	9.4	 16
681	 22	107.0	19.7	 16
682	 22	362.0	76.7	 20
683	 22	53.8	9.7	 16
684	 22	61.3	9.3	 16
685	 22	48.3	7.8	 16
686	 22	87.0	13.4	 16
687	 22	127.0	21.3	 16
688	 22	73.0	16.1	 16
689	 22	406.8	62.9	 16
690	 22	529.5	69.0	 16
691	 22	133.3	21.2	 16
692	 22	66.3	12.2	 16
693	 22	229.0	58.3	 16
694	 22	192.5	20.1	 16
695	 22	101.5	19.5	 16
696	 22	136.3	21.2	 16
697	 22	99.0	18.8	 16
698	 22	68.3	12.0	 16
699	 22	55.0	7.9	 16
700	 22	307.8	42.2	 16
701	 22	124.0	18.2	 16
702	 22	62.8	8.9	 16
703	 22	81.3	10.1	 16
704	 22	80.0	12.5	 16
705	 22	461.0	55.5	 16
706	 22	122.3	20.3	 16
707	 22	139.5	22.8	 16
708	 22	315.8	31.2	 16
709	 22	388.0	26.4	 16
710	 22	152.3	16.2	 16
711	 22	7194.8	964.9	 16
  0	 23	100.3	18.7	 16
  1	 23	247.0	26.0	 16
  2	 23	109.0	16.0	 16
  3	 23	229.0	44.2	 16
  4	 23	2314.8	244.7	 16
  5	 23	64.3	10.5	 16
  6	 23	189.3	28.7	 16
  7	 23	182.5	28.9	 16
  8	 23	109.5	17.9	 16
  9	 23	87.5	15.9	 16
 10	 23	92.3	20.5	 16
 11	 23	148.0	21.7	 16
 12	 23	168.5	25.7	 16
 13	 23	149.5	27.6	 16
 14	 23	82.3	17.9	 16
 15	 23	125.8	19.8	 16
 16	 23	182.0	26.9	 16
 17	 23	181.8	38.7	 16
 18	 23	85.0	20.0	 16
 19	 23	289.0	34.0	 16
 20	 23	171.5	23.4	 16
 21	 23	62.0	9.2	 16
 22	 23	308.5	49.9	 16
 23	 23	405.3	70.0	 16
 24	 23	459.0	68.1	 16
 25	 23	406.8	84.4	 16
 26	 23	234.8	39.9	 16
 27	 23	99.0	21.4	 16
 28	 23	65.3	12.0	 16
 29	 23	97.3	18.1	 16
 30	 23	428.8	81.0	 16
 31	 23	183.5	35.4	 16
 32	 23	438.3	83.8	 16
 33	 23	524.5	114.2	 16
 34	 23	58.3	8.8	 16
 35	 23	250.3	53.7	 16
 36	 23	91.8	22.3	 16
 37	 23	169.5	32.0	 16
 38	 23	61.0	10.0	 16
 39	 23	309.0	69.3	 16
 40	 23	148.3	27.8	 16
 41	 23	59.0	11.5	 16
 42	 23	71.0	11.9	 16
 43	 23	74.0	25.0	 16
 44	 23	366.0	57.2	 16
 45	 23	284.3	32.9	 16
 46	 23	100.8	16.7	 16
 47	 23	86.5	16.3	 16
 48	 23	245.0	34.1	 16
 49	 23	102.0	12.1	 16
 50	 23	72.8	13.7	 16
 51	 23	334.5	72.2	 16
 52	 23	557.0	89.7	 16
 53	 23	443.3	47.5	 16
 54	 23	235.3	61.0	 16
 55	 23	229.3	20.1	 16
 56	 23	90.0	17.4	 16
 57	 23	139.5	18.2	 16
 58	 23	90.5	15.2	 16
 59	 23	106.5	16.4	 16
 60	 23	247.0	53.9	 16
 61	 23	111.3	16.3	 16
 62	 23	214.3	30.5	 16
 63	 23	118.5	21.5	 16
 64	 23	882.5	153.0	 16
 65	 23	144.3	33.0	 16
 66	 23	63.5	9.8	 16
 67	 23	80.0	14.1	 16
 68	 23	70.3	15.7	 16
 69	 23	98.0	13.2	 16
 70	 23	192.8	27.5	 16
 71	 23	61.0	9.5	 16
 72	 23	86.5	19.4	 16
 73	 23	153.3	19.3	 16
 74	 23	172.5	21.5	 16
 75	 23	209.3	29.4	 16
 76	 23	142.0	21.9	 16
 77	 23	57.0	10.5	 16
 78	 23	69.5	13.2	 16
 79	 23	117.3	18.4	 16
 80	 23	66.3	9.8	 16
 81	 23	56.3	12.8	 16
 82	 23	82.3	16.8	 16
 83	 23	73.0	11.0	 16
 84	 23	109.8	22.7	 16
 85	 23	103.3	16.1	 16
 86	 23	75.5	13.9	 16
 87	 23	380.0	35.7	 16
 88	 23	191.8	27.1	 16
 89	 23	92.8	16.7	 16
 90	 23	76.3	13.1	 20
 91	 23	197.5	23.1	 16
 92	 23	226.5	29.3	 16
 93	 23	513.3	68.9	 16
 94	 23	175.3	30.6	 16
 95	 23	73.8	13.0	 16
 96	 23	80.3	15.5	 16
 97	 23	203.8	46.0	 16
 98	 23	95.8	16.5	 16
 99	 23	221.5	44.6	 16
100	 23	77.5	15.8	 16
101	 23	134.3	20.9	 16
102	 23	173.0	32.0	 16
103	 23	78.0	18.4	 16
104	 23	350.5	44.3	 16
105	 23	318.8	52.5	 16
106	 23	255.5	45.1	 16
107	 23	67.0	12.7	 16
108	 23	548.0	95.6	 16
109	 23	56.3	11.6	 16
110	 23	70.8	10.9	 16
111	 23	748.8	165.2	 16
112	 23	361.0	62.9	 16
113	 23	58.3	6.1	 16
114	 23	89.0	37.4	 16
115	 23	268.0	65.7	 16
116	 23	61.0	9.7	 16
117	 23	144.0	16.1	 16
118	 23	121.0	29.3	 16
119	 23	61.3	11.1	 16
120	 23	101.8	17.8	 16
121	 23	198.3	18.9	 16
122	 23	99.3	16.1	 16
123	 23	214.5	38.9	 16
124	 23	121.8	28.9	 16
125	 23	176.0	22.7	 16
126	 23	87.0	12.4	 16
127	 23	120.8	20.2	 16
128	 23	136.0	22.8	 16
129	 23	127.8	14.7	 16
130	 23	93.3	23.2	 16
131	 23	183.8	35.0	 16
132	 23	486.8	94.2	 16
133	 23	1229.5	279.6	 16
134	 23	436.0	47.5	 16
135	 23	231.3	33.8	 16
136	 23	940.8	200.3	 16
137	 23	111.5	16.2	 16
138	 23	561.5	110.5	 16
139	 23	128.3	19.3	 16
140	 23	65.5	11.9	 16
141	 23	61.3	39.4	 16
142	 23	79.5	16.1	 16
143	 23	56.0	7.5	 16
144	 23	230.8	44.7	 16
145	 23	132.5	22.5	 16
146	 23	321.3	64.9	 16
147	 23	85.5	15.8	 16
148	 23	78.5	12.2	 16
149	 23	102.3	23.3	 16
150	 23	56.0	8.0	 16
151	 23	76.5	18.8	 16
152	 23	170.3	29.5	 16
153	 23	209.3	57.9	 16
154	 23	130.3	20.9	 16
155	 23	176.3	33.5	 16
156	 23	188.0	26.5	 16
157	 23	88.8	12.7	 16
158	 23	395.8	64.5	 16
159	 23	159.5	21.3	 16
160	 23	1658.0	229.1	 16
161	 23	1422.0	222.5	 16
162	 23	66.8	13.6	 16
163	 23	73.5	10.1	 16
164	 23	576.0	75.8	 16
165	 23	69.0	9.7	 16
166	 23	62.5	12.9	 16
167	 23	221.8	23.1	 16
168	 23	84.0	15.6	 16
169	 23	176.3	19.9	 16
170	 23	248.0	27.6	 16
171	 23	57.5	11.8	 16
172	 23	268.3	33.8	 16
173	 23	137.5	18.7	 16
174	 23	273.8	47.7	 16
175	 23	91.3	16.6	 16
176	 23	95.3	18.8	 16
177	 23	165.3	20.5	 16
178	 23	111.5	20.5	 16
179	 23	119.3	18.5	 16
180	 23	123.5	13.9	 16
181	 23	236.8	26.7	 16
182	 23	246.0	15.2	 16
183	 23	74.5	10.6	 16
184	 23	141.8	26.9	 16
185	 23	108.5	18.0	 16
186	 23	62.5	10.0	 16
187	 23	169.0	24.9	 16
188	 23	232.3	32.4	 16
189	 23	195.0	26.4	 16
190	 23	141.8	26.9	 16
191	 23	125.3	16.7	 16
192	 23	106.0	26.7	 16
193	 23	94.8	15.9	 16
194	 23	103.0	19.0	 16
195	 23	100.3	21.2	 16
196	 23	787.3	92.1	 16
197	 23	76.5	18.0	 16
198	 23	76.3	12.8	 16
199	 23	73.3	13.5	 16
200	 23	233.8	34.5	 16
201	 23	80.3	12.0	 16
202	 23	60.5	11.7	 16
203	 23	329.5	25.6	 16
204	 23	158.5	25.8	 16
205	 23	166.5	24.5	 16
206	 23	329.0	41.5	 16
207	 23	66.8	15.1	 16
208	 23	100.0	19.4	 16
209	 23	157.0	26.5	 20
210	 23	260.8	64.0	 16
211	 23	721.5	112.3	 16
212	 23	94.5	17.2	 16
213	 23	870.5	199.3	 16
214	 23	64.5	13.5	 16
215	 23	702.5	133.9	 16
216	 23	110.5	19.0	 16
217	 23	78.3	18.0	 16
218	 23	69.5	13.7	 16
219	 23	1665.0	401.6	 16
220	 23	82.8	14.1	 16
221	 23	97.0	12.9	 16
222	 23	182.8	37.9	 16
223	 23	64.3	8.8	 16
224	 23	619.8	118.4	 16
225	 23	198.3	29.6	 16
226	 23	114.3	16.1	 16
227	 23	112.5	19.8	 16
228	 23	95.8	17.3	 16
229	 23	106.0	18.4	 16
230	 23	96.3	17.5	 16
231	 23	530.0	85.0	 16
232	 23	404.5	52.3	 16
233	 23	185.8	35.3	 16
234	 23	77.3	18.2	 16
235	 23	761.8	124.0	 16
236	 23	102.0	19.0	 16
237	 23	62.0	9.4	 16
238	 23	50.0	7.6	 16
239	 23	433.3	64.2	 16
240	 23	141.8	27.0	 16
241	 23	124.3	17.9	 16
242	 23	67.0	12.3	 16
243	 23	89.5	10.8	 16
244	 23	322.5	68.5	 16
245	 23	275.8	30.4	 16
246	 23	61.8	15.3	 16
247	 23	67.3	10.3	 16
248	 23	240.0	39.6	 16
249	 23	156.0	41.4	 16
250	 23	155.3	25.4	 16
251	 23	58.3	11.8	 16
252	 23	150.5	29.7	 16
253	 23	74.0	12.9	 16
254	 23	59.3	10.7	 16
255	 23	61.0	11.6	 16
256	 23	196.3	26.5	 16
257	 23	135.0	34.3	 16
258	 23	176.8	28.6	 16
259	 23	203.3	26.1	 16
260	 23	2383.5	137.2	 16
261	 23	2644.3	173.7	 16
262	 23	2649.3	433.3	 16
263	 23	82.3	12.6	 16
264	 23	74.8	16.5	 16
265	 23	58.0	8.6	 16
266	 23	339.0	35.6	 16
267	 23	111.0	18.4	 16
268	 23	126.8	20.8	 16
269	 23	138.5	19.5	 16
270	 23	187.0	13.8	 16
271	 23	83.3	15.2	 16
272	 23	733.0	119.5	 16
273	 23	7185.3	1034.3	 16
274	 23	71.3	10.1	 16
275	 23	148.3	18.4	 16
276	 23	247.3	33.3	 16
277	 23	61.0	12.4	 16
278	 23	297.0	41.7	 16
279	 23	788.3	90.1	 16
280	 23	128.3	25.0	 16
281	 23	102.3	13.7	 16
282	 23	192.3	42.7	 16
283	 23	337.3	48.0	 16
284	 23	75.0	11.6	 16
285	 23	67.0	7.3	 16
286	 23	116.8	17.6	 16
287	 23	250.8	38.7	 16
288	 23	69.0	14.6	 16
289	 23	646.3	83.9	 16
290	 23	1207.5	164.8	 16
291	 23	251.8	37.6	 16
292	 23	193.3	31.8	 16
293	 23	202.3	31.1	 16
294	 23	200.0	20.8	 16
295	 23	205.8	22.9	 16
296	 23	69.0	10.7	 16
297	 23	66.5	11.0	 16
298	 23	302.3	39.7	 16
299	 23	1580.3	203.9	 16
300	 23	91.3	12.3	 16
301	 23	99.0	16.5	 16
302	 23	2193.5	377.9	 16
303	 23	75.3	15.1	 16
304	 23	173.5	23.2	 16
305	 23	151.3	22.6	 16
306	 23	409.3	36.2	 16
307	 23	458.8	90.9	 16
308	 23	78.8	18.0	 16
309	 23	89.5	16.9	 16
310	 23	107.5	19.2	 16
311	 23	276.3	37.6	 16
312	 23	430.5	90.2	 16
313	 23	75.3	13.1	 16
314	 23	256.8	39.4	 16
315	 23	54.5	7.9	 12
316	 23	112.3	13.3	 16
317	 23	88.8	14.0	 16
318	 23	74.3	9.8	 16
319	 23	72.3	13.8	 16
320	 23	121.8	22.6	 16
321	 23	75.8	17.3	 16
322	 23	176.8	24.0	 16
323	 23	95.3	12.4	 16
324	 23	224.5	34.4	 16
325	 23	953.0	95.4	 16
326	 23	150.3	17.0	 16
327	 23	73.0	12.8	 20
328	 23	378.8	98.7	 16
329	 23	95.5	20.0	 16
330	 23	344.0	102.9	 16
331	 23	83.5	15.4	 16
332	 23	102.3	19.1	 16
333	 23	58.5	11.6	 16
334	 23	65.8	14.9	 16
335	 23	68.3	16.7	 16
336	 23	84.0	20.6	 16
337	 23	90.0	20.9	 16
338	 23	143.0	26.9	 16
339	 23	60.8	15.4	 16
340	 23	77.0	11.0	 16
341	 23	132.5	141.4	 16
342	 23	124.3	17.9	 16
343	 23	112.0	19.6	 16
344	 23	158.3	16.9	 16
345	 23	411.3	66.9	 16
346	 23	119.3	18.4	 16
347	 23	87.8	13.9	 16
348	 23	143.8	24.4	 16
349	 23	232.5	43.1	 16
350	 23	143.8	23.4	 16
351	 23	62.3	11.5	 16
352	 23	443.3	83.1	 16
353	 23	86.3	21.3	 16
354	 23	396.3	87.5	 16
355	 23	78.0	10.7	 16
356	 23	279.3	44.5	 16
357	 23	119.5	22.1	 16
358	 23	675.5	55.5	 16
359	 23	312.8	45.5	 16
360	 23	174.3	27.9	 16
361	 23	331.3	38.8	 16
362	 23	1182.3	176.8	 16
363	 23	220.5	26.5	 16
364	 23	106.5	17.3	 16
365	 23	404.0	79.2	 16
366	 23	59.3	9.0	 16
367	 23	56.5	8.4	 16
368	 23	69.3	10.0	 16
369	 23	61.5	7.8	 16
370	 23	94.3	15.0	 16
371	 23	55.5	10.4	 16
372	 23	405.3	62.8	 16
373	 23	394.3	64.0	 16
374	 23	60.5	10.2	 16
375	 23	83.3	10.3	 16
376	 23	76.5	17.7	 16
377	 23	424.5	55.1	 16
378	 23	151.5	23.2	 16
379	 23	255.8	32.0	 16
380	 23	179.8	19.2	 16
381	 23	3339.3	342.3	 16
382	 23	169.3	29.0	 16
383	 23	66.8	10.8	 16
384	 23	76.3	15.1	 16
385	 23	99.0	20.3	 16
386	 23	75.3	10.2	 16
387	 23	87.5	15.7	 16
388	 23	55.8	12.2	 16
389	 23	101.5	16.0	 16
390	 23	101.8	16.4	 16
391	 23	836.0	106.2	 16
392	 23	72.3	14.9	 16
393	 23	87.3	14.8	 16
394	 23	361.3	57.8	 16
395	 23	102.3	12.2	 16
396	 23	99.3	18.9	 16
397	 23	721.3	88.0	 16
398	 23	148.0	16.6	 16
399	 23	288.5	47.0	 16
400	 23	1025.8	103.9	 16
401	 23	156.0	22.5	 16
402	 23	1973.0	207.6	 16
403	 23	6155.5	557.4	 16
404	 23	119.5	15.4	 16
405	 23	2973.5	342.0	 16
406	 23	86.3	14.7	 16
407	 23	130.5	20.2	 16
408	 23	180.3	19.6	 16
409	 23	99.8	12.7	 16
410	 23	152.8	16.6	 16
411	 23	146.8	21.8	 16
412	 23	595.0	60.6	 16
413	 23	857.5	116.1	 16
414	 23	54.8	14.3	 16
415	 23	120.5	18.4	 16
416	 23	116.5	16.8	 16
417	 23	128.3	19.8	 16
418	 23	257.0	29.6	 16
419	 23	138.0	21.3	 16
420	 23	62.8	13.5	 16
421	 23	62.8	11.0	 16
422	 23	555.5	53.3	 16
423	 23	61.0	12.7	 16
424	 23	74.3	16.3	 16
425	 23	75.8	11.5	 16
426	 23	2930.0	283.5	 16
427	 23	255.0	38.5	 16
428	 23	354.3	39.0	 16
429	 23	5170.3	333.9	 16
430	 23	2960.8	338.8	 16
431	 23	82.0	17.7	 16
432	 23	132.5	27.3	 16
433	 23	104.0	12.1	 16
434	 23	284.5	33.0	 16
435	 23	574.5	45.7	 16
436	 23	403.5	62.9	 16
437	 23	201.0	32.8	 16
438	 23	176.5	21.0	 16
439	 23	382.0	50.8	 16
440	 23	67.8	11.6	 16
441	 23	225.8	23.1	 16
442	 23	149.5	20.4	 16
443	 23	94.3	14.5	 16
444	 23	110.0	14.7	 16
445	 23	284.0	42.1	 16
446	 23	316.8	51.0	 20
447	 23	838.0	62.6	 16
448	 23	232.5	51.7	 16
449	 23	111.8	13.0	 16
450	 23	413.5	89.9	 16
451	 23	253.5	54.4	 16
452	 23	293.3	53.7	 16
453	 23	228.3	63.1	 16
454	 23	770.0	179.1	 16
455	 23	777.3	176.0	 16
456	 23	99.3	14.9	 16
457	 23	144.8	21.4	 16
458	 23	466.5	90.8	 16
459	 23	432.5	99.7	 16
460	 23	184.0	36.0	 16
461	 23	720.5	143.2	 16
462	 23	213.0	26.3	 16
463	 23	124.3	17.1	 16
464	 23	223.8	43.7	 16
465	 23	72.5	12.9	 16
466	 23	56.0	10.3	 16
467	 23	60.3	11.2	 16
468	 23	630.5	120.3	 16
469	 23	139.0	21.0	 16
470	 23	72.0	13.1	 16
471	 23	76.8	19.0	 16
472	 23	901.5	155.2	 16
473	 23	220.3	26.0	 16
474	 23	363.3	53.9	 16
475	 23	839.5	160.9	 16
476	 23	243.8	33.5	 16
477	 23	341.0	44.4	 16
478	 23	141.5	27.1	 16
479	 23	759.8	94.6	 16
480	 23	106.5	14.9	 16
481	 23	71.0	12.9	 16
482	 23	87.3	11.3	 16
483	 23	72.0	11.4	 16
484	 23	627.3	62.7	 16
485	 23	222.8	35.8	 16
486	 23	190.8	34.0	 16
487	 23	154.3	24.8	 16
488	 23	87.5	13.5	 16
489	 23	971.5	208.0	 16
490	 23	143.8	35.2	 16
491	 23	140.0	23.6	 16
492	 23	131.3	25.2	 16
493	 23	927.8	138.3	 16
494	 23	124.5	19.5	 16
495	 23	113.0	17.9	 16
496	 23	78.3	12.9	 16
497	 23	1492.3	359.6	 16
498	 23	144.5	24.7	 16
499	 23	235.0	44.3	 16
500	 23	105.3	22.6	 16
501	 23	89.3	16.3	 16
502	 23	197.8	40.4	 16
503	 23	98.8	31.3	 16
504	 23	370.5	68.8	 16
505	 23	575.0	100.3	 16
506	 23	168.3	40.0	 16
507	 23	128.3	20.0	 16
508	 23	65.8	13.5	 16
509	 23	125.3	16.6	 16
510	 23	138.3	21.8	 16
511	 23	745.3	125.6	 16
512	 23	77.5	16.0	 16
513	 23	122.3	22.4	 16
514	 23	45.3	6.0	 16
515	 23	53.3	6.9	 16
516	 23	87.3	12.3	 16
517	 23	63.5	10.5	 16
518	 23	105.3	16.1	 16
519	 23	86.5	13.9	 16
520	 23	133.5	39.9	 16
521	 23	962.8	62.4	 16
522	 23	1795.3	298.7	 16
523	 23	165.8	24.6	 16
524	 23	568.5	81.9	 16
525	 23	72.3	12.8	 16
526	 23	73.5	10.3	 16
527	 23	237.8	28.2	 16
528	 23	247.0	22.0	 16
529	 23	269.8	22.1	 16
530	 23	510.3	50.4	 16
531	 23	128.0	20.3	 16
532	 23	7960.5	501.9	 16
533	 23	262.3	33.8	 16
534	 23	341.0	35.3	 16
535	 23	834.3	59.9	 16
536	 23	174.5	24.9	 16
537	 23	393.0	39.5	 16
538	 23	111.8	12.6	 16
539	 23	89.8	15.2	 16
540	 23	299.8	24.9	 16
541	 23	67.8	10.0	 16
542	 23	79.3	13.6	 16
543	 23	3841.8	284.4	 16
544	 23	151.8	20.9	 16
545	 23	71.3	14.3	 16
546	 23	73.8	10.1	 16
547	 23	134.3	38.5	 16
548	 23	70.3	15.3	 16
549	 23	321.5	39.5	 16
550	 23	121.3	13.4	 16
551	 23	589.3	74.0	 16
552	 23	101.5	17.0	 16
553	 23	198.0	23.5	 16
554	 23	158.0	20.6	 16
555	 23	186.0	29.6	 16
556	 23	460.3	81.2	 16
557	 23	172.5	23.7	 16
558	 23	126.0	19.5	 16
559	 23	61.8	12.4	 16
560	 23	74.8	18.5	 16
561	 23	7852.8	1065.6	 16
562	 23	99.3	23.3	 16
563	 23	168.5	23.8	 16
564	 23	218.8	34.9	 16
565	 23	480.0	107.3	 20
566	 23	1112.3	232.1	 16
567	 23	1153.3	208.6	 16
568	 23	881.3	154.3	 16
569	 23	115.5	16.3	 16
570	 23	115.8	19.3	 16
571	 23	63.3	13.9	 16
572	 23	188.3	21.8	 16
573	 23	1702.8	195.2	 16
574	 23	519.3	49.3	 16
575	 23	1585.0	235.8	 16
576	 23	126.0	27.3	 16
577	 23	83.8	12.0	 16
578	 23	1800.5	256.7	 16
579	 23	92.5	13.3	 16
580	 23	74.5	13.7	 16
581	 23	676.0	95.3	 16
582	 23	533.8	69.7	 16
583	 23	82.0	14.5	 16
584	 23	281.3	46.6	 16
585	 23	73.3	11.3	 16
586	 23	1380.0	168.6	 16
587	 23	1724.8	222.7	 16
588	 23	128.0	32.0	 16
589	 23	1824.3	196.6	 16
590	 23	937.5	108.0	 16
591	 23	113.3	18.1	 16
592	 23	793.8	84.7	 16
593	 23	792.8	120.1	 16
594	 23	1548.0	209.4	 16
595	 23	82.5	12.3	 16
596	 23	324.5	53.5	 16
597	 23	63.0	12.4	 16
598	 23	105.8	16.3	 16
599	 23	405.5	59.3	 16
600	 23	122.5	16.8	 16
601	 23	57.8	11.4	 16
602	 23	88.5	16.6	 16
603	 23	2566.5	457.4	 16
604	 23	73.3	13.8	 16
605	 23	269.8	55.6	 16
606	 23	227.5	42.1	 16
607	 23	200.8	25.8	 16
608	 23	927.5	153.9	 16
609	 23	260.3	44.2	 16
610	 23	206.0	21.7	 16
611	 23	648.5	90.9	 16
612	 23	750.0	71.7	 16
613	 23	179.3	20.9	 16
614	 23	1021.5	86.0	 16
615	 23	228.8	37.4	 16
616	 23	280.0	35.5	 16
617	 23	114.0	22.4	 16
618	 23	518.0	61.8	 16
619	 23	518.5	72.1	 16
620	 23	153.5	18.2	 16
621	 23	103.3	29.6	 16
622	 23	210.3	27.8	 16
623	 23	313.8	33.2	 16
624	 23	151.0	17.9	 16
625	 23	170.3	22.5	 16
626	 23	147.0	29.2	 16
627	 23	128.3	14.1	 16
628	 23	123.3	20.8	 16
629	 23	70.0	15.0	 16
630	 23	69.8	13.4	 16
631	 23	198.8	31.5	 16
632	 23	107.3	23.7	 16
633	 23	181.3	26.8	 16
634	 23	2270.3	285.4	 16
635	 23	759.5	62.1	 16
636	 23	519.8	88.3	 16
637	 23	552.3	83.2	 16
638	 23	135.0	22.3	 16
639	 23	222.5	22.0	 16
640	 23	1488.3	159.4	 16
641	 23	116.0	21.8	 16
642	 23	104.3	13.3	 16
643	 23	96.8	18.8	 16
644	 23	636.3	97.2	 16
645	 23	122.8	19.6	 16
646	 23	456.5	77.0	 16
647	 23	114.8	14.5	 16
648	 23	330.5	45.2	 16
649	 23	198.5	27.1	 16
650	 23	176.5	28.1	 16
651	 23	139.3	25.5	 16
652	 23	152.0	29.5	 16
653	 23	114.8	21.6	 16
654	 23	77.8	11.8	 16
655	 23	83.8	13.5	 16
656	 23	182.5	29.6	 16
657	 23	145.8	22.4	 16
658	 23	176.0	23.2	 16
659	 23	350.8	38.8	 16
660	 23	202.8	21.5	 16
661	 23	65.5	11.8	 16
662	 23	286.5	34.8	 16
663	 23	216.3	23.4	 16
664	 23	248.0	27.4	 16
665	 23	102.5	13.9	 16
666	 23	105.3	16.8	 16
667	 23	97.3	18.7	 16
668	 23	59.3	9.1	 16
669	 23	86.3	13.2	 16
670	 23	75.3	20.4	 16
671	 23	232.0	30.4	 16
672	 23	110.8	18.5	 16
673	 23	81.3	12.0	 16
674	 23	77.3	13.7	 16
675	 23	131.0	22.7	 16
676	 23	306.5	31.4	 16
677	 23	233.3	33.8	 16
678	 23	88.8	12.8	 16
679	 23	52.5	9.0	 16
680	 23	63.0	10.6	 16
681	 23	162.8	20.6	 16
682	 23	1424.3	181.6	 16
683	 23	149.0	34.2	 20
684	 23	404.8	77.7	 16
685	 23	283.0	49.1	 16
686	 23	98.8	16.4	 16
687	 23	136.5	24.3	 16
688	 23	437.5	37.8	 16
689	 23	150.3	27.1	 16
690	 23	119.5	20.7	 16
691	 23	174.3	35.5	 16
692	 23	55.5	13.8	 16
693	 23	159.8	32.6	 16
694	 23	698.3	105.8	 16
695	 23	199.5	35.0	 16
696	 23	65.0	10.2	 16
697	 23	71.0	11.0	 16
698	 23	70.3	19.2	 16
699	 23	68.5	9.6	 16
700	 23	405.8	58.9	 16
701	 23	318.8	25.8	 16
702	 23	297.0	36.8	 16
703	 23	585.3	74.8	 16
704	 23	223.0	27.9	 16
705	 23	214.5	31.1	 16
706	 23	230.8	30.9	 16
707	 23	231.3	21.3	 16
708	 23	215.5	17.1	 16
709	 23	222.8	30.6	 16
710	 23	108.3	20.3	 16
711	 23	92.5	13.5	 16
  0	 24	8804.8	1278.8	 16
  1	 24	80.8	16.8	 16
  2	 24	82.8	16.8	 16
  3	 24	67.5	13.3	 16
  4	 24	408.3	51.3	 16
  5	 24	64.5	14.9	 16
  6	 24	169.8	17.3	 16
  7	 24	182.3	27.5	 16
  8	 24	138.8	20.7	 16
  9	 24	70.8	12.3	 16
 10	 24	66.3	11.8	 16
 11	 24	257.8	45.8	 16
 12	 24	96.0	14.1	 16
 13	 24	459.3	42.8	 16
 14	 24	86.3	14.4	 16
 15	 24	187.5	20.6	 16
 16	 24	103.5	15.6	 16
 17	 24	70.3	15.1	 16
 18	 24	93.8	16.2	 16
 19	 24	135.5	21.0	 16
 20	 24	110.3	20.3	 16
 21	 24	45.5	8.8	 16
 22	 24	110.5	12.4	 16
 23	 24	203.5	32.3	 16
 24	 24	569.0	111.4	 16
 25	 24	448.5	96.4	 16
 26	 24	70.3	10.0	 16
 27	 24	78.5	13.5	 16
 28	 24	73.3	17.9	 16
 29	 24	149.8	31.3	 16
 30	 24	193.5	26.8	 16
 31	 24	417.5	87.6	 16
 32	 24	133.3	27.2	 16
 33	 24	166.3	34.6	 16
 34	 24	76.0	12.9	 16
 35	 24	89.0	21.7	 16
 36	 24	201.3	36.5	 16
 37	 24	80.3	20.2	 16
 38	 24	64.0	7.7	 16
 39	 24	78.5	12.4	 16
 40	 24	63.3	10.5	 16
 41	 24	75.3	17.6	 16
 42	 24	72.3	12.5	 16
 43	 24	70.0	10.0	 16
 44	 24	113.5	14.2	 16
 45	 24	364.3	51.4	 16
 46	 24	81.5	14.8	 16
 47	 24	102.0	14.1	 16
 48	 24	136.0	17.2	 16
 49	 24	134.3	22.2	 16
 50	 24	64.0	8.1	 16
 51	 24	136.0	22.6	 16
 52	 24	523.0	76.2	 16
 53	 24	445.8	53.1	 16
 54	 24	396.0	189.6	 16
 55	 24	380.5	54.7	 16
 56	 24	67.3	8.2	 16
 57	 24	77.5	14.5	 16
 58	 24	69.0	9.3	 16
 59	 24	78.0	15.7	 16
 60	 24	73.0	13.1	 16
 61	 24	90.8	19.3	 16
 62	 24	86.8	14.4	 16
 63	 24	96.3	12.1	 16
 64	 24	121.0	21.9	 16
 65	 24	81.0	17.0	 16
 66	 24	80.5	15.4	 16
 67	 24	69.5	14.4	 16
 68	 24	58.0	9.9	 16
 69	 24	89.5	12.8	 16
 70	 24	176.0	30.0	 16
 71	 24	68.3	10.1	 16
 72	 24	82.3	12.8	 16
 73	 24	162.0	17.8	 16
 74	 24	97.3	13.1	 16
 75	 24	97.8	16.6	 16
 76	 24	155.5	27.9	 16
 77	 24	64.0	15.7	 16
 78	 24	68.5	13.0	 16
 79	 24	87.5	15.5	 16
 80	 24	65.5	14.6	 16
 81	 24	57.0	9.4	 16
 82	 24	111.0	14.3	 16
 83	 24	63.3	10.7	 16
 84	 24	61.3	10.4	 16
 85	 24	78.3	11.3	 16
 86	 24	62.5	11.3	 16
 87	 24	81.3	12.2	 16
 88	 24	119.0	16.8	 16
 89	 24	79.3	13.2	 16
 90	 24	71.0	17.5	 16
 91	 24	101.3	19.0	 20
 92	 24	102.0	17.8	 16
 93	 24	124.0	20.7	 16
 94	 24	188.5	24.5	 16
 95	 24	93.3	20.5	 16
 96	 24	87.5	18.1	 16
 97	 24	75.0	10.8	 16
 98	 24	109.0	17.2	 16
 99	 24	109.0	18.3	 16
100	 24	85.5	14.2	 16
101	 24	105.5	14.0	 16
102	 24	133.0	18.4	 16
103	 24	70.0	14.1	 16
104	 24	148.0	22.8	 16
105	 24	146.5	19.8	 16
106	 24	87.5	15.9	 16
107	 24	69.5	14.4	 16
108	 24	91.3	14.2	 16
109	 24	55.8	7.5	 16
110	 24	60.5	10.8	 16
111	 24	158.8	30.2	 16
112	 24	195.5	36.4	 16
113	 24	67.3	11.7	 16
114	 24	56.3	11.7	 16
115	 24	52.3	10.2	 16
116	 24	57.5	14.2	 16
117	 24	82.0	19.7	 16
118	 24	77.3	13.4	 16
119	 24	67.5	14.2	 16
120	 24	97.0	29.3	 16
121	 24	84.0	12.3	 16
122	 24	65.0	11.2	 16
123	 24	84.8	16.5	 16
124	 24	60.0	11.1	 16
125	 24	58.0	10.9	 16
126	 24	87.8	17.9	 16
127	 24	102.5	21.0	 16
128	 24	102.5	15.9	 16
129	 24	103.8	17.0	 16
130	 24	111.5	15.0	 16
131	 24	89.5	11.9	 16
132	 24	142.5	20.5	 16
133	 24	461.8	70.1	 16
134	 24	481.5	35.5	 16
135	 24	161.0	50.9	 16
136	 24	425.0	67.4	 16
137	 24	114.3	16.9	 16
138	 24	254.3	51.0	 16
139	 24	102.3	20.5	 16
140	 24	66.5	10.5	 16
141	 24	63.8	13.4	 16
142	 24	65.8	14.0	 16
143	 24	58.5	8.9	 16
144	 24	108.0	21.5	 16
145	 24	105.5	14.5	 16
146	 24	249.5	55.0	 16
147	 24	59.3	15.4	 16
148	 24	66.8	13.1	 16
149	 24	63.0	16.8	 16
150	 24	53.5	8.5	 16
151	 24	76.5	14.4	 16
152	 24	57.5	11.0	 16
153	 24	68.3	11.8	 16
154	 24	60.0	10.6	 16
155	 24	84.0	19.4	 16
156	 24	86.0	11.9	 16
157	 24	110.3	14.9	 16
158	 24	130.5	24.0	 16
159	 24	67.8	9.9	 16
160	 24	564.8	72.2	 16
161	 24	397.5	69.1	 16
162	 24	57.3	9.1	 16
163	 24	57.3	8.1	 16
164	 24	176.0	32.1	 16
165	 24	78.0	12.3	 16
166	 24	60.3	9.2	 16
167	 24	114.5	13.7	 16
168	 24	91.8	46.4	 16
169	 24	81.0	16.6	 16
170	 24	104.3	12.7	 16
171	 24	82.3	13.7	 16
172	 24	152.3	15.8	 16
173	 24	971.8	83.9	 16
174	 24	95.5	20.4	 16
175	 24	58.0	9.6	 16
176	 24	58.8	11.2	 16
177	 24	70.3	14.1	 16
178	 24	76.5	15.8	 16
179	 24	77.5	15.3	 16
180	 24	449.0	38.8	 16
181	 24	208.8	27.2	 16
182	 24	123.5	26.8	 16
183	 24	75.3	10.2	 16
184	 24	143.0	25.6	 16
185	 24	61.3	8.8	 16
186	 24	57.5	8.3	 16
187	 24	75.8	8.8	 16
188	 24	279.0	37.0	 16
189	 24	381.0	35.2	 16
190	 24	189.8	27.7	 16
191	 24	161.0	24.1	 16
192	 24	109.5	19.8	 16
193	 24	122.5	19.7	 16
194	 24	112.8	20.4	 16
195	 24	68.8	11.1	 16
196	 24	211.3	24.0	 16
197	 24	104.5	15.7	 16
198	 24	87.5	20.5	 16
199	 24	78.5	13.2	 16
200	 24	157.0	29.0	 16
201	 24	60.3	13.1	 16
202	 24	57.0	11.0	 16
203	 24	95.8	14.3	 16
204	 24	58.8	9.1	 16
205	 24	90.5	15.5	 16
206	 24	113.0	22.6	 16
207	 24	60.0	10.0	 16
208	 24	66.0	11.1	 16
209	 24	121.3	19.2	 16
210	 24	70.3	9.4	 20
211	 24	82.0	13.1	 16
212	 24	82.8	25.5	 16
213	 24	160.3	24.6	 16
214	 24	59.0	9.2	 16
215	 24	197.5	39.9	 16
216	 24	53.3	9.4	 16
217	 24	57.3	7.6	 16
218	 24	73.8	36.7	 16
219	 24	265.5	45.8	 16
220	 24	77.3	22.9	 16
221	 24	149.5	30.8	 16
222	 24	55.5	7.2	 16
223	 24	53.3	10.6	 16
224	 24	82.3	10.1	 16
225	 24	124.8	22.9	 16
226	 24	69.5	11.9	 16
227	 24	81.0	12.2	 16
228	 24	72.8	9.4	 16
229	 24	81.3	15.7	 16
230	 24	111.5	20.8	 16
231	 24	186.3	18.1	 16
232	 24	665.5	89.2	 16
233	 24	189.3	31.7	 16
234	 24	86.5	32.2	 16
235	 24	164.0	29.2	 16
236	 24	57.3	8.7	 16
237	 24	48.5	9.0	 16
238	 24	52.3	7.2	 16
239	 24	825.3	100.5	 16
240	 24	107.5	18.5	 16
241	 24	129.3	19.8	 16
242	 24	58.0	11.2	 16
243	 24	75.5	10.0	 16
244	 24	79.3	10.7	 16
245	 24	92.0	9.7	 16
246	 24	63.3	10.0	 16
247	 24	54.0	11.1	 16
248	 24	117.5	22.9	 16
249	 24	101.0	15.9	 16
250	 24	76.5	14.2	 16
251	 24	50.0	12.1	 16
252	 24	125.5	22.0	 16
253	 24	55.3	9.5	 16
254	 24	61.3	10.5	 16
255	 24	54.8	7.1	 16
256	 24	219.3	21.4	 16
257	 24	130.0	21.1	 16
258	 24	199.0	19.4	 16
259	 24	111.5	15.0	 16
260	 24	839.5	67.2	 16
261	 24	905.0	56.2	 16
262	 24	899.3	145.2	 16
263	 24	63.5	11.7	 16
264	 24	65.3	13.4	 16
265	 24	63.0	16.5	 16
266	 24	79.8	18.8	 16
267	 24	97.5	15.0	 16
268	 24	154.8	24.2	 16
269	 24	136.0	15.2	 16
270	 24	91.8	14.3	 16
271	 24	78.0	18.1	 16
272	 24	191.5	29.5	 16
273	 24	1815.8	223.8	 16
274	 24	61.3	9.0	 16
275	 24	98.0	15.7	 16
276	 24	165.3	24.8	 16
277	 24	56.3	10.1	 16
278	 24	150.3	15.7	 16
279	 24	214.5	54.7	 16
280	 24	83.8	14.3	 16
281	 24	106.0	17.2	 16
282	 24	228.0	27.9	 16
283	 24	258.5	32.3	 16
284	 24	77.8	14.6	 16
285	 24	63.5	10.7	 16
286	 24	60.5	14.7	 16
287	 24	52.3	5.4	 16
288	 24	68.0	13.5	 16
289	 24	619.5	73.0	 16
290	 24	166.0	26.4	 16
291	 24	283.3	34.0	 16
292	 24	274.5	22.9	 16
293	 24	99.8	21.6	 16
294	 24	149.3	19.5	 16
295	 24	91.0	19.7	 16
296	 24	61.3	13.8	 16
297	 24	69.0	16.6	 16
298	 24	95.5	15.5	 16
299	 24	254.3	34.8	 16
300	 24	78.3	8.4	 16
301	 24	60.0	10.4	 16
302	 24	174.0	32.4	 16
303	 24	96.8	10.5	 16
304	 24	126.8	13.5	 16
305	 24	139.8	23.4	 16
306	 24	131.3	26.2	 16
307	 24	113.5	18.7	 16
308	 24	70.3	14.5	 16
309	 24	71.3	12.6	 16
310	 24	145.0	24.4	 16
311	 24	162.3	16.9	 16
312	 24	115.3	18.0	 16
313	 24	74.3	10.2	 16
314	 24	137.3	19.4	 16
315	 24	64.5	13.3	 16
316	 24	81.3	13.7	 16
317	 24	76.8	17.0	 16
318	 24	66.3	9.9	 16
319	 24	70.8	13.8	 16
320	 24	179.8	25.2	 16
321	 24	80.0	11.0	 16
322	 24	85.8	17.0	 16
323	 24	80.0	11.4	 16
324	 24	89.8	17.4	 16
325	 24	197.3	23.6	 16
326	 24	299.3	39.3	 16
327	 24	61.5	7.7	 16
328	 24	342.3	40.7	 16
329	 24	73.3	13.6	 20
330	 24	93.0	21.1	 16
331	 24	65.0	10.6	 16
332	 24	80.5	16.9	 16
333	 24	55.5	9.1	 16
334	 24	49.8	11.3	 16
335	 24	82.5	17.7	 16
336	 24	64.0	11.3	 16
337	 24	78.0	12.4	 16
338	 24	92.5	19.4	 16
339	 24	66.0	13.0	 16
340	 24	96.0	14.9	 16
341	 24	110.5	15.5	 16
342	 24	95.5	14.1	 16
343	 24	202.0	27.6	 16
344	 24	122.5	24.5	 16
345	 24	438.3	35.4	 16
346	 24	149.5	26.7	 16
347	 24	80.3	11.4	 16
348	 24	121.5	23.9	 16
349	 24	154.5	19.9	 16
350	 24	88.8	17.2	 16
351	 24	64.0	11.7	 16
352	 24	77.3	11.0	 16
353	 24	75.3	17.2	 16
354	 24	81.5	12.1	 16
355	 24	79.0	15.7	 16
356	 24	354.0	42.2	 16
357	 24	101.0	28.0	 16
358	 24	177.3	13.3	 16
359	 24	213.8	31.9	 16
360	 24	132.0	19.8	 16
361	 24	433.0	33.6	 16
362	 24	337.3	52.1	 16
363	 24	95.3	16.3	 16
364	 24	123.8	20.0	 16
365	 24	211.0	46.1	 16
366	 24	60.5	9.8	 16
367	 24	57.3	12.1	 16
368	 24	62.3	9.9	 16
369	 24	56.3	15.1	 16
370	 24	83.8	12.2	 16
371	 24	62.3	14.0	 16
372	 24	124.5	24.9	 16
373	 24	129.3	18.0	 16
374	 24	55.3	11.4	 16
375	 24	68.5	11.5	 16
376	 24	80.3	15.3	 16
377	 24	184.3	21.9	 16
378	 24	196.3	29.0	 16
379	 24	314.3	39.5	 16
380	 24	109.5	22.5	 16
381	 24	667.0	72.7	 16
382	 24	117.8	14.9	 16
383	 24	68.3	11.0	 16
384	 24	78.3	18.6	 16
385	 24	71.0	11.6	 16
386	 24	69.0	9.2	 16
387	 24	140.5	27.6	 16
388	 24	65.0	10.4	 16
389	 24	84.3	12.8	 16
390	 24	104.0	16.8	 16
391	 24	134.5	22.5	 16
392	 24	65.8	9.3	 16
393	 24	58.3	7.3	 16
394	 24	71.3	14.6	 16
395	 24	68.3	10.1	 16
396	 24	71.0	12.4	 16
397	 24	160.3	18.3	 16
398	 24	75.0	14.8	 16
399	 24	103.8	20.8	 16
400	 24	282.0	60.9	 16
401	 24	68.0	12.7	 16
402	 24	204.3	24.2	 16
403	 24	2540.8	394.7	 16
404	 24	95.3	15.2	 16
405	 24	964.3	139.4	 16
406	 24	54.8	10.2	 16
407	 24	68.3	12.9	 16
408	 24	438.5	57.0	 16
409	 24	214.0	23.0	 16
410	 24	175.5	17.1	 16
411	 24	74.5	10.9	 16
412	 24	127.0	20.7	 16
413	 24	211.5	41.3	 16
414	 24	54.3	8.4	 16
415	 24	80.0	14.5	 16
416	 24	69.5	15.2	 16
417	 24	103.5	15.3	 16
418	 24	107.8	12.5	 16
419	 24	221.3	24.7	 16
420	 24	61.0	12.3	 16
421	 24	59.5	8.7	 16
422	 24	373.8	26.9	 16
423	 24	59.3	12.7	 16
424	 24	75.3	14.3	 16
425	 24	77.8	17.2	 16
426	 24	716.3	87.0	 16
427	 24	98.3	11.6	 16
428	 24	226.3	21.7	 16
429	 24	1103.3	116.2	 16
430	 24	472.8	70.0	 16
431	 24	65.0	10.6	 16
432	 24	94.0	13.5	 16
433	 24	68.3	10.8	 16
434	 24	152.5	25.8	 16
435	 24	468.5	41.4	 16
436	 24	149.5	24.7	 16
437	 24	80.5	14.2	 16
438	 24	114.0	14.5	 16
439	 24	313.5	34.8	 16
440	 24	76.5	12.1	 16
441	 24	144.3	23.1	 16
442	 24	119.8	25.2	 16
443	 24	89.5	17.0	 16
444	 24	77.5	15.9	 16
445	 24	164.3	25.6	 16
446	 24	201.0	20.8	 16
447	 24	600.3	36.1	 16
448	 24	170.3	27.6	 20
449	 24	131.5	18.9	 16
450	 24	300.5	57.9	 16
451	 24	146.8	33.6	 16
452	 24	95.5	18.6	 16
453	 24	121.0	31.5	 16
454	 24	175.0	28.8	 16
455	 24	176.3	30.2	 16
456	 24	63.5	12.4	 16
457	 24	67.8	12.3	 16
458	 24	92.3	16.3	 16
459	 24	95.8	21.1	 16
460	 24	70.3	17.7	 16
461	 24	183.5	30.2	 16
462	 24	425.3	73.5	 16
463	 24	105.3	20.0	 16
464	 24	159.3	33.6	 16
465	 24	56.5	7.1	 16
466	 24	52.0	13.6	 16
467	 24	54.0	11.3	 16
468	 24	183.5	32.8	 16
469	 24	117.3	19.1	 16
470	 24	141.5	28.7	 16
471	 24	60.3	8.3	 16
472	 24	246.5	35.3	 16
473	 24	206.5	49.1	 16
474	 24	363.0	46.8	 16
475	 24	243.5	39.4	 16
476	 24	138.0	21.7	 16
477	 24	80.8	16.9	 16
478	 24	68.5	17.7	 16
479	 24	525.3	44.6	 16
480	 24	145.3	21.5	 16
481	 24	85.3	10.2	 16
482	 24	75.5	12.7	 16
483	 24	58.5	13.4	 16
484	 24	222.8	28.4	 16
485	 24	146.8	26.8	 16
486	 24	105.5	15.8	 16
487	 24	76.8	15.2	 16
488	 24	60.5	9.1	 16
489	 24	133.8	23.5	 16
490	 24	86.0	22.1	 16
491	 24	59.5	12.1	 16
492	 24	74.5	10.1	 16
493	 24	527.5	81.9	 16
494	 24	161.3	23.3	 16
495	 24	92.8	12.4	 16
496	 24	83.3	13.0	 16
497	 24	235.5	50.4	 16
498	 24	68.3	14.5	 16
499	 24	70.5	17.8	 16
500	 24	60.5	12.1	 16
501	 24	58.3	6.7	 16
502	 24	72.8	11.4	 16
503	 24	63.3	14.1	 16
504	 24	205.5	29.5	 16
505	 24	273.5	31.8	 16
506	 24	106.3	16.7	 16
507	 24	63.5	13.6	 16
508	 24	62.3	11.6	 16
509	 24	121.5	12.8	 16
510	 24	118.5	12.8	 16
511	 24	158.5	30.6	 16
512	 24	64.3	14.0	 16
513	 24	54.0	8.6	 16
514	 24	53.5	11.9	 16
515	 24	57.3	7.5	 16
516	 24	84.3	16.9	 16
517	 24	80.3	15.6	 16
518	 24	151.3	19.0	 16
519	 24	94.0	12.6	 16
520	 24	238.8	32.9	 16
521	 24	1488.8	86.1	 16
522	 24	259.3	36.0	 16
523	 24	152.5	25.3	 16
524	 24	229.3	23.9	 16
525	 24	59.5	15.2	 16
526	 24	94.3	13.5	 16
527	 24	208.3	40.8	 16
528	 24	169.3	19.1	 16
529	 24	183.3	15.2	 16
[truncated: 11,094,099 more chars]
