# Supplementary material for: Identify potential drugs for cardiovascular diseases caused by stress-induced genes in vascular smooth muscle cells
Source: PeerJ. 2016 Sep 28;4:e2478. doi: 10.7717/peerj.2478 (PMC5045879; doi:10.7717/peerj.2478)
Supplement: Supplemental Information 6 [file peerj-04-2478-s006.cel]

[CEL]
Version=3

[HEADER]
Cols=712
Rows=712
TotalX=712
TotalY=712
OffsetX=0
OffsetY=0
GridCornerUL=228 234
GridCornerUR=4504 290
GridCornerLR=4458 4560
GridCornerLL=182 4504
Axis-invertX=0
AxisInvertY=0
swapXY=0
DatHeader=[2..46155]  T 4:CLS=4733 RWS=4733 XIN=3  YIN=3  VE=17        2.0 11/22/02 16:01:58       HG-U133A.1sq                  6
Algorithm=Percentile
AlgorithmParameters=Percentile:75;CellMargin:2;OutlierHigh:1.500;OutlierLow:1.004

[INTENSITY]
NumberCells=506944
CellHeader=X	Y	MEAN	STDV	NPIXELS
  0	  0	126.3	21.7	 16
  1	  0	8341.5	882.9	 16
  2	  0	129.3	27.4	 16
  3	  0	8381.0	767.6	 16
  4	  0	84.8	15.1	 16
  5	  0	114.3	11.1	 16
  6	  0	7612.8	1785.3	 16
  7	  0	126.0	87.2	 16
  8	  0	7626.0	1386.7	 16
  9	  0	146.0	57.6	 16
 10	  0	7704.3	1266.9	 16
 11	  0	109.3	19.0	 16
 12	  0	7566.5	959.1	 16
 13	  0	116.5	16.9	 16
 14	  0	7308.3	805.9	 16
 15	  0	117.0	14.5	 16
 16	  0	7399.3	803.3	 16
 17	  0	124.3	20.1	 16
 18	  0	7320.5	696.4	 16
 19	  0	110.3	16.0	 16
 20	  0	7468.5	1497.7	 16
 21	  0	121.0	17.2	 16
 22	  0	7556.8	1137.6	 16
 23	  0	118.5	21.6	 16
 24	  0	7505.3	958.2	 16
 25	  0	120.0	21.8	 16
 26	  0	7660.5	702.5	 16
 27	  0	125.8	12.2	 16
 28	  0	7613.3	536.9	 16
 29	  0	127.3	18.2	 16
 30	  0	7368.5	471.9	 16
 31	  0	123.5	15.6	 16
 32	  0	7251.0	1701.6	 16
 33	  0	128.8	20.8	 16
 34	  0	7305.3	1557.6	 16
 35	  0	117.8	15.5	 16
 36	  0	7665.5	1242.9	 16
 37	  0	128.8	24.5	 16
 38	  0	7838.5	836.9	 16
 39	  0	111.3	13.9	 16
 40	  0	7733.3	690.1	 16
 41	  0	127.3	22.1	 16
 42	  0	7371.3	718.9	 16
 43	  0	123.5	11.9	 16
 44	  0	7598.0	603.2	 12
 45	  0	127.8	20.5	 16
 46	  0	7607.8	1723.1	 16
 47	  0	115.0	23.6	 16
 48	  0	7716.5	1288.0	 16
 49	  0	113.0	20.1	 16
 50	  0	7667.3	1078.3	 16
 51	  0	118.3	17.7	 16
 52	  0	7241.8	825.9	 16
 53	  0	111.3	16.0	 16
 54	  0	7240.3	759.1	 16
 55	  0	136.0	22.8	 16
 56	  0	7258.5	825.5	 16
 57	  0	132.8	26.1	 16
 58	  0	7341.5	1683.2	 16
 59	  0	136.0	21.9	 16
 60	  0	7627.0	1437.1	 16
 61	  0	123.8	13.9	 16
 62	  0	7313.5	1326.7	 16
 63	  0	116.5	22.4	 16
 64	  0	7499.8	825.1	 16
 65	  0	135.3	22.5	 16
 66	  0	7066.0	809.9	 16
 67	  0	129.5	22.0	 16
 68	  0	7333.5	718.5	 16
 69	  0	129.0	21.0	 16
 70	  0	7100.0	1734.0	 16
 71	  0	118.5	20.4	 16
 72	  0	7186.8	1615.2	 16
 73	  0	135.0	25.0	 16
 74	  0	7381.8	1319.1	 16
 75	  0	145.5	26.2	 20
 76	  0	7590.5	1784.3	 16
 77	  0	137.8	30.5	 16
 78	  0	7439.5	1681.5	 16
 79	  0	138.3	25.4	 16
 80	  0	7540.8	1626.1	 16
 81	  0	116.8	15.1	 16
 82	  0	7764.3	1609.5	 16
 83	  0	133.3	22.1	 16
 84	  0	7695.5	1817.4	 16
 85	  0	109.3	17.4	 16
 86	  0	7509.3	1704.9	 16
 87	  0	131.3	23.9	 16
 88	  0	7762.8	1562.6	 16
 89	  0	113.0	29.1	 16
 90	  0	7593.0	1468.4	 16
 91	  0	108.3	15.6	 16
 92	  0	7430.5	1431.7	 16
 93	  0	124.0	19.0	 16
 94	  0	7577.5	1428.3	 16
 95	  0	129.0	18.2	 16
 96	  0	7360.5	1892.6	 16
 97	  0	107.5	15.6	 16
 98	  0	7381.3	1748.4	 16
 99	  0	123.8	25.0	 16
100	  0	7699.3	1610.1	 16
101	  0	116.0	17.8	 16
102	  0	7489.0	1562.2	 16
103	  0	121.8	14.0	 16
104	  0	7136.0	1422.4	 16
105	  0	128.3	23.1	 16
106	  0	6996.0	1389.0	 16
107	  0	129.0	24.2	 16
108	  0	6928.5	1911.3	 16
109	  0	100.8	14.0	 16
110	  0	7058.8	1827.0	 16
111	  0	122.5	21.0	 16
112	  0	7212.8	1707.2	 16
113	  0	149.8	20.6	 16
114	  0	7503.0	1530.4	 16
115	  0	140.5	22.4	 16
116	  0	7130.5	1282.2	 16
117	  0	129.3	17.4	 16
118	  0	7140.8	1259.7	 16
119	  0	121.8	21.2	 16
120	  0	7348.0	1242.0	 16
121	  0	129.0	34.5	 16
122	  0	7248.3	1757.0	 16
123	  0	124.0	22.1	 16
124	  0	7207.5	1629.4	 16
125	  0	130.8	24.9	 16
126	  0	7306.0	1411.4	 16
127	  0	144.0	18.9	 16
128	  0	7254.0	1280.9	 16
129	  0	124.8	20.6	 16
130	  0	7199.3	1138.4	 16
131	  0	136.5	23.1	 16
132	  0	7339.8	1111.3	 16
133	  0	130.3	19.9	 12
134	  0	7228.8	1773.4	 16
135	  0	121.0	13.7	 16
136	  0	7311.8	1659.2	 16
137	  0	116.8	18.1	 16
138	  0	7547.0	1275.4	 16
139	  0	130.8	19.8	 16
140	  0	7382.8	1055.3	 16
141	  0	123.0	22.5	 16
142	  0	7436.8	847.4	 16
143	  0	108.0	15.5	 16
144	  0	7190.8	770.2	 16
145	  0	113.3	11.2	 16
146	  0	7078.0	1772.2	 16
147	  0	101.3	11.7	 16
148	  0	7225.3	1471.8	 16
149	  0	127.5	17.5	 16
150	  0	7002.0	1204.3	 16
151	  0	118.5	14.9	 16
152	  0	7339.8	888.9	 16
153	  0	126.8	18.3	 16
154	  0	7274.5	705.2	 16
155	  0	119.5	13.3	 16
156	  0	7256.5	569.6	 16
157	  0	111.3	15.1	 16
158	  0	7036.5	616.4	 16
159	  0	120.3	18.6	 16
160	  0	6829.3	1459.2	 16
161	  0	125.5	21.6	 16
162	  0	6814.3	1280.1	 16
163	  0	127.3	20.4	 16
164	  0	6711.8	1050.0	 16
165	  0	117.3	16.2	 16
166	  0	6862.3	888.3	 16
167	  0	102.5	14.1	 16
168	  0	6661.5	721.7	 16
169	  0	108.8	12.6	 16
170	  0	6681.0	658.8	 16
171	  0	115.5	16.0	 16
172	  0	6613.0	1225.3	 16
173	  0	117.8	20.0	 16
174	  0	6965.5	1065.1	 16
175	  0	114.5	15.0	 16
176	  0	6870.0	896.2	 16
177	  0	121.8	16.0	 16
178	  0	6619.3	702.4	 16
179	  0	104.5	13.8	 16
180	  0	6595.0	593.1	 16
181	  0	130.0	19.3	 16
182	  0	6352.5	613.7	 16
183	  0	117.0	16.4	 16
184	  0	6035.3	1310.0	 16
185	  0	120.0	15.9	 16
186	  0	6621.8	1107.0	 16
187	  0	117.8	27.0	 16
188	  0	6729.0	893.0	 16
189	  0	120.0	18.3	 16
190	  0	6695.8	824.6	 16
191	  0	114.8	14.7	 16
192	  0	6660.5	687.3	 16
193	  0	121.3	22.3	 16
194	  0	6570.0	609.2	 16
195	  0	118.3	22.7	 16
196	  0	6444.0	635.9	 16
197	  0	101.3	14.4	 16
198	  0	6622.5	1213.0	 16
199	  0	108.0	15.0	 16
200	  0	6685.8	926.0	 16
201	  0	113.8	17.4	 16
202	  0	6835.8	832.8	 16
203	  0	118.3	16.2	 16
204	  0	6824.3	665.7	 16
205	  0	111.3	11.5	 16
206	  0	6819.3	538.8	 16
207	  0	115.3	14.1	 16
208	  0	6699.5	603.1	 16
209	  0	122.3	14.5	 16
210	  0	6636.3	1379.9	 16
211	  0	119.0	26.6	 16
212	  0	6325.3	1083.2	 16
213	  0	114.0	18.5	 16
214	  0	6364.8	916.5	 16
215	  0	111.3	17.3	 16
216	  0	6338.0	753.9	 16
217	  0	111.5	20.7	 16
218	  0	6028.0	1421.1	 20
219	  0	128.5	27.7	 16
220	  0	6406.3	1602.3	 16
221	  0	123.0	35.0	 16
222	  0	6677.5	1772.4	 12
223	  0	121.8	25.4	 16
224	  0	6400.0	1741.2	 16
225	  0	123.5	24.3	 16
226	  0	6304.0	1672.3	 16
227	  0	133.8	33.9	 16
228	  0	6581.8	1544.7	 16
229	  0	132.0	23.2	 16
230	  0	6711.5	1549.3	 16
231	  0	136.0	17.4	 16
232	  0	6528.3	1437.1	 16
233	  0	180.3	65.0	 16
234	  0	7066.0	1492.4	 16
235	  0	76.8	12.7	 16
236	  0	4015.0	1065.5	 16
237	  0	81.3	12.1	 16
238	  0	98.3	19.3	 16
239	  0	73.8	15.2	 16
240	  0	6727.3	1410.7	 16
241	  0	104.3	13.7	 16
242	  0	5966.8	1174.6	 16
243	  0	105.8	15.7	 16
244	  0	6128.3	1196.5	 16
245	  0	99.8	11.6	 16
246	  0	6171.3	1158.3	 16
247	  0	98.3	16.9	 16
248	  0	6586.0	1500.8	 16
249	  0	119.3	23.2	 16
250	  0	6259.0	1208.3	 16
251	  0	105.3	16.1	 16
252	  0	6405.8	1098.1	 16
253	  0	107.3	19.4	 16
254	  0	5735.0	882.1	 16
255	  0	108.0	22.5	 16
256	  0	6058.0	808.3	 16
257	  0	124.0	22.3	 16
258	  0	6026.5	707.6	 16
259	  0	110.3	14.5	 16
260	  0	5970.5	714.3	 16
261	  0	96.5	13.4	 16
262	  0	6132.0	1150.0	 16
263	  0	109.5	15.6	 16
264	  0	6224.8	969.2	 16
265	  0	110.3	25.1	 16
266	  0	6104.0	671.9	 16
267	  0	105.5	16.4	 16
268	  0	6060.3	587.7	 16
269	  0	131.5	25.9	 16
270	  0	5961.0	628.6	 16
271	  0	100.0	17.4	 16
272	  0	6195.0	717.1	 16
273	  0	102.0	18.2	 16
274	  0	5784.0	1023.6	 16
275	  0	105.0	15.7	 16
276	  0	6090.0	935.1	 16
277	  0	99.8	13.4	 16
278	  0	6201.3	674.9	 16
279	  0	107.5	18.6	 16
280	  0	6261.5	627.2	 16
281	  0	114.3	44.3	 16
282	  0	6529.3	490.6	 16
283	  0	111.5	17.3	 16
284	  0	6599.8	532.1	 16
285	  0	114.3	15.8	 16
286	  0	6434.3	1059.6	 16
287	  0	103.5	15.3	 16
288	  0	6259.5	919.0	 16
289	  0	107.8	13.3	 16
290	  0	6299.3	730.4	 16
291	  0	105.5	17.4	 16
292	  0	6111.5	737.0	 16
293	  0	112.0	20.8	 16
294	  0	6135.8	556.8	 16
295	  0	96.0	14.6	 16
296	  0	6197.8	531.8	 16
297	  0	108.0	14.0	 16
298	  0	6388.3	781.4	 16
299	  0	104.8	16.8	 16
300	  0	6307.8	1010.0	 16
301	  0	110.5	15.6	 16
302	  0	6400.8	904.8	 16
303	  0	112.0	13.8	 16
304	  0	6533.0	713.8	 16
305	  0	99.8	14.4	 16
306	  0	6415.5	473.5	 16
307	  0	105.3	15.7	 16
308	  0	6625.8	597.7	 16
309	  0	109.5	16.3	 16
310	  0	6325.0	643.1	 16
311	  0	119.3	24.2	 12
312	  0	6359.5	1319.1	 16
313	  0	122.5	16.6	 16
314	  0	6814.5	904.7	 16
315	  0	125.0	15.2	 16
316	  0	6627.0	613.3	 16
317	  0	115.5	30.3	 16
318	  0	6664.3	622.5	 16
319	  0	111.8	11.5	 16
320	  0	6665.3	659.4	 16
321	  0	105.8	14.1	 16
322	  0	6677.8	757.9	 16
323	  0	117.5	19.2	 16
324	  0	6827.8	1548.0	 16
325	  0	116.0	23.5	 16
326	  0	7243.5	1022.0	 16
327	  0	178.8	30.4	 16
328	  0	7029.8	656.4	 16
329	  0	227.5	35.7	 16
330	  0	7177.3	757.2	 16
331	  0	116.3	19.7	 16
332	  0	6784.5	642.8	 16
333	  0	120.5	17.4	 16
334	  0	6786.3	674.4	 16
335	  0	121.3	16.6	 16
336	  0	6815.0	863.7	 16
337	  0	110.3	17.0	 16
338	  0	6805.0	982.1	 16
339	  0	108.5	14.5	 16
340	  0	6953.5	932.1	 16
341	  0	111.8	12.9	 16
342	  0	6826.8	776.8	 16
343	  0	113.5	16.9	 16
344	  0	6787.0	701.3	 16
345	  0	109.8	22.6	 16
346	  0	6863.8	778.7	 16
347	  0	111.5	14.6	 16
348	  0	6762.0	912.0	 16
349	  0	114.5	15.9	 16
350	  0	7009.5	1210.3	 16
351	  0	106.0	19.3	 16
352	  0	7075.8	938.9	 16
353	  0	112.3	11.1	 16
354	  0	7062.8	938.7	 16
355	  0	112.3	18.4	 16
356	  0	6943.0	782.0	 16
357	  0	120.0	13.9	 16
358	  0	7000.5	721.1	 16
359	  0	124.5	22.6	 16
360	  0	6579.8	1197.0	 20
361	  0	101.3	20.4	 16
362	  0	6820.3	1607.6	 16
363	  0	127.0	21.1	 16
364	  0	6715.5	1336.2	 16
365	  0	114.5	15.9	 16
366	  0	6900.3	1239.4	 16
367	  0	105.5	12.7	 16
368	  0	6930.3	1144.0	 16
369	  0	118.8	14.1	 16
370	  0	6858.0	1084.9	 16
371	  0	124.0	17.5	 16
372	  0	7096.0	1059.8	 16
373	  0	103.8	14.9	 16
374	  0	7002.8	1098.4	 16
375	  0	121.8	18.8	 16
376	  0	7168.5	1356.3	 16
377	  0	126.8	27.7	 16
378	  0	6974.5	1128.2	 16
379	  0	108.3	17.2	 16
380	  0	6989.8	1089.1	 16
381	  0	104.5	18.8	 16
382	  0	7079.5	972.8	 16
383	  0	113.0	14.2	 16
384	  0	6819.0	926.4	 16
385	  0	109.3	18.7	 16
386	  0	6876.5	979.8	 16
387	  0	108.3	18.6	 16
388	  0	7115.5	1303.3	 16
389	  0	108.0	12.8	 16
390	  0	6982.3	1172.3	 16
391	  0	103.0	18.6	 16
392	  0	7039.0	918.1	 16
393	  0	117.5	18.2	 16
394	  0	7167.5	708.8	 16
395	  0	125.3	26.5	 16
396	  0	6907.5	574.8	 16
397	  0	108.8	19.4	 16
398	  0	6872.8	704.1	 16
399	  0	116.3	14.9	 16
400	  0	7019.0	542.6	 12
401	  0	116.5	17.7	 16
402	  0	6738.3	1203.5	 16
403	  0	113.5	14.3	 16
404	  0	7193.3	873.7	 16
405	  0	112.3	24.1	 16
406	  0	6874.3	743.5	 16
407	  0	98.5	11.1	 16
408	  0	6777.5	602.4	 16
409	  0	121.8	19.2	 16
410	  0	6634.8	656.5	 16
411	  0	114.5	16.9	 16
412	  0	6573.3	758.6	 16
413	  0	102.0	14.5	 16
414	  0	6858.3	1364.2	 16
415	  0	99.5	15.2	 16
416	  0	7033.3	986.0	 16
417	  0	101.0	19.7	 16
418	  0	7041.3	746.6	 16
419	  0	112.0	19.0	 16
420	  0	7123.5	598.8	 16
421	  0	109.0	21.2	 16
422	  0	7016.8	621.4	 16
423	  0	109.8	17.2	 16
424	  0	6836.0	820.1	 16
425	  0	129.5	25.3	 16
426	  0	6573.0	1313.0	 16
427	  0	111.0	20.8	 16
428	  0	6706.0	874.5	 16
429	  0	114.5	18.2	 16
430	  0	7011.8	698.0	 16
431	  0	128.5	26.3	 16
432	  0	6928.8	646.5	 16
433	  0	107.5	17.4	 16
434	  0	6800.0	576.4	 16
435	  0	115.5	20.6	 16
436	  0	6569.8	510.8	 16
437	  0	100.5	11.7	 16
438	  0	7096.5	790.9	 16
439	  0	103.3	12.2	 16
440	  0	7085.5	868.1	 16
441	  0	108.8	14.7	 16
442	  0	6819.5	750.6	 16
443	  0	110.5	15.0	 16
444	  0	7172.3	520.9	 16
445	  0	109.3	16.2	 16
446	  0	6757.5	424.8	 16
447	  0	115.5	17.0	 16
448	  0	6662.8	536.1	 16
449	  0	109.0	14.9	 16
450	  0	6823.3	582.2	 16
451	  0	104.3	15.1	 16
452	  0	6817.5	1049.9	 16
453	  0	106.8	14.7	 16
454	  0	6870.3	815.3	 16
455	  0	111.8	17.1	 16
456	  0	7152.3	775.2	 16
457	  0	108.0	14.2	 16
458	  0	7101.3	549.2	 16
459	  0	115.3	14.9	 16
460	  0	6800.0	541.1	 16
461	  0	105.5	18.1	 16
462	  0	6846.0	644.2	 16
463	  0	101.3	10.1	 16
464	  0	6910.8	1086.0	 16
465	  0	110.8	14.5	 16
466	  0	7000.5	796.1	 16
467	  0	99.8	16.7	 16
468	  0	6899.5	672.1	 16
469	  0	119.0	17.4	 16
470	  0	6821.8	558.6	 16
471	  0	125.3	24.1	 16
472	  0	64.0	9.0	 16
473	  0	5237.5	606.2	 16
474	  0	68.3	10.1	 16
475	  0	92.0	16.1	 16
476	  0	65.5	10.2	 16
477	  0	103.0	16.1	 16
478	  0	6708.8	1037.3	 16
479	  0	111.8	16.5	 16
480	  0	6817.5	884.3	 16
481	  0	114.8	20.6	 16
482	  0	6827.3	625.4	 16
483	  0	104.5	17.1	 16
484	  0	6679.0	604.2	 16
485	  0	108.3	18.2	 16
486	  0	6398.8	565.4	 16
487	  0	116.3	12.2	 16
488	  0	6731.3	729.1	 16
489	  0	114.3	10.1	 12
490	  0	6884.3	1248.0	 16
491	  0	106.3	13.1	 16
492	  0	7150.3	990.7	 16
493	  0	118.5	15.0	 16
494	  0	6970.0	734.2	 16
495	  0	108.8	15.0	 16
496	  0	6907.0	601.8	 16
497	  0	105.8	13.7	 16
498	  0	6746.0	577.9	 16
499	  0	117.5	16.1	 16
500	  0	6739.5	843.1	 16
501	  0	120.8	33.3	 16
502	  0	6472.0	1658.4	 20
503	  0	130.0	37.2	 16
504	  0	6907.8	1748.9	 16
505	  0	143.3	36.2	 16
506	  0	7111.0	1562.6	 16
507	  0	132.3	24.1	 16
508	  0	7113.3	1459.1	 16
509	  0	133.8	26.3	 16
510	  0	6892.0	1412.5	 16
511	  0	116.5	19.0	 16
512	  0	7051.0	1303.6	 16
513	  0	118.5	19.7	 16
514	  0	6973.0	1410.5	 16
515	  0	139.0	31.5	 16
516	  0	6940.3	1390.2	 16
517	  0	110.5	17.6	 16
518	  0	7076.8	1250.3	 16
519	  0	111.5	16.5	 16
520	  0	7045.5	1198.8	 16
521	  0	94.0	14.8	 16
522	  0	6815.0	1084.8	 16
523	  0	112.3	16.4	 16
524	  0	6563.0	936.8	 16
525	  0	112.5	20.2	 16
526	  0	6796.0	1123.3	 16
527	  0	112.5	18.2	 16
528	  0	6901.8	1160.3	 16
529	  0	129.0	24.7	 16
530	  0	7110.5	1083.1	 16
531	  0	120.0	13.7	 16
532	  0	6722.3	855.7	 16
533	  0	116.8	17.4	 16
534	  0	6752.3	834.7	 16
535	  0	103.3	16.0	 16
536	  0	6619.5	685.4	 16
537	  0	97.8	13.6	 16
538	  0	6661.5	720.1	 16
539	  0	116.3	16.2	 16
540	  0	6680.0	1216.4	 16
541	  0	104.8	13.2	 16
542	  0	6838.8	1006.6	 16
543	  0	119.0	16.1	 16
544	  0	6833.3	728.5	 16
545	  0	114.5	19.2	 16
546	  0	6685.3	553.1	 16
547	  0	106.8	14.4	 16
548	  0	6689.3	444.3	 16
549	  0	94.3	13.0	 16
550	  0	6506.3	504.6	 16
551	  0	108.5	17.1	 16
552	  0	6819.3	732.9	 16
553	  0	107.0	18.7	 16
554	  0	6815.0	1027.8	 16
555	  0	109.3	16.5	 16
556	  0	7142.3	726.7	 16
557	  0	106.5	15.9	 16
558	  0	7015.5	689.5	 16
559	  0	115.0	14.4	 16
560	  0	6957.5	652.3	 16
561	  0	111.0	15.5	 16
562	  0	6857.3	715.5	 16
563	  0	101.3	13.0	 16
564	  0	7040.5	922.5	 16
565	  0	110.5	19.4	 16
566	  0	7098.8	1166.5	 16
567	  0	114.3	17.1	 16
568	  0	6936.3	1019.2	 16
569	  0	125.5	19.6	 16
570	  0	6841.3	789.6	 16
571	  0	101.0	15.1	 16
572	  0	6681.0	853.0	 16
573	  0	127.0	22.8	 16
574	  0	6796.5	983.9	 16
575	  0	103.5	22.7	 16
576	  0	6707.5	1096.0	 16
577	  0	106.8	13.1	 16
578	  0	7262.3	957.2	 12
579	  0	113.3	19.0	 16
580	  0	7051.0	1207.9	 16
581	  0	116.0	22.7	 16
582	  0	7260.0	1132.6	 16
583	  0	116.5	22.0	 16
584	  0	6943.8	1061.2	 16
585	  0	121.3	17.2	 16
586	  0	6785.8	1049.9	 16
587	  0	113.0	29.1	 16
588	  0	6756.5	1095.3	 16
589	  0	120.8	20.4	 16
590	  0	7015.8	1182.2	 16
591	  0	117.0	20.0	 16
592	  0	6895.5	1276.2	 16
593	  0	705.8	951.8	 16
594	  0	8276.3	1359.4	 16
595	  0	370.5	81.1	 16
596	  0	8907.5	1467.0	 16
597	  0	499.0	231.8	 16
598	  0	7414.5	981.6	 16
599	  0	120.8	29.2	 16
600	  0	6823.0	849.5	 16
601	  0	109.3	16.9	 16
602	  0	6767.8	861.3	 16
603	  0	119.5	19.7	 16
604	  0	7011.5	875.8	 16
605	  0	108.3	16.5	 16
606	  0	6730.8	786.4	 16
607	  0	105.5	19.2	 16
608	  0	6824.5	713.9	 16
609	  0	91.8	13.1	 16
610	  0	6651.3	617.6	 16
611	  0	104.3	13.6	 16
612	  0	6644.3	629.0	 16
613	  0	108.5	19.7	 16
614	  0	6684.5	707.1	 16
615	  0	103.3	14.4	 16
616	  0	6700.3	863.3	 16
617	  0	106.3	14.1	 16
618	  0	6711.8	813.7	 16
619	  0	105.5	15.3	 16
620	  0	6589.0	663.9	 16
621	  0	113.0	19.1	 16
622	  0	6630.5	677.1	 16
623	  0	103.0	13.4	 16
624	  0	6773.0	742.1	 16
625	  0	101.8	15.5	 16
626	  0	6643.8	831.4	 16
627	  0	116.8	19.8	 16
628	  0	6579.5	1030.4	 16
629	  0	114.3	18.0	 16
630	  0	6531.8	941.3	 16
631	  0	107.5	18.1	 16
632	  0	6302.8	945.9	 16
633	  0	104.0	17.8	 16
634	  0	6501.3	902.1	 16
635	  0	118.0	25.7	 16
636	  0	6766.5	1033.7	 16
637	  0	120.0	27.0	 16
638	  0	6867.3	1215.5	 16
639	  0	115.3	17.2	 16
640	  0	6731.3	1313.7	 16
641	  0	107.3	23.4	 16
642	  0	6664.8	1395.4	 16
643	  0	127.5	24.4	 16
644	  0	6691.3	1311.1	 16
645	  0	122.5	26.8	 20
646	  0	6513.0	707.5	 16
647	  0	102.0	16.6	 16
648	  0	6756.0	804.1	 16
649	  0	107.0	16.7	 16
650	  0	6348.5	778.1	 16
651	  0	107.5	17.5	 16
652	  0	6322.3	989.2	 16
653	  0	114.3	13.0	 16
654	  0	6558.3	1249.8	 16
655	  0	117.0	14.9	 16
656	  0	6581.0	871.2	 16
657	  0	118.3	17.7	 16
658	  0	6572.3	791.4	 16
659	  0	119.3	16.6	 16
660	  0	6237.0	649.8	 16
661	  0	120.3	19.7	 16
662	  0	6408.8	651.9	 16
663	  0	115.3	21.1	 16
664	  0	6486.5	748.3	 16
665	  0	112.5	17.9	 16
666	  0	6373.0	931.8	 16
667	  0	118.3	16.6	 12
668	  0	6256.8	963.6	 16
669	  0	126.0	21.5	 16
670	  0	6221.8	791.6	 16
671	  0	116.0	15.0	 16
672	  0	6159.0	738.1	 16
673	  0	124.0	18.2	 16
674	  0	6076.5	673.6	 16
675	  0	107.3	12.6	 16
676	  0	6037.3	694.8	 16
677	  0	119.0	18.1	 16
678	  0	6166.5	888.8	 16
679	  0	118.0	16.1	 16
680	  0	6306.5	778.6	 16
681	  0	134.8	33.3	 16
682	  0	6210.3	675.9	 16
683	  0	118.0	24.4	 16
684	  0	6332.3	604.2	 16
685	  0	102.8	18.7	 16
686	  0	6249.0	539.6	 16
687	  0	110.8	15.4	 16
688	  0	6149.0	472.4	 16
689	  0	113.0	13.0	 16
690	  0	5999.5	542.5	 16
691	  0	119.3	13.7	 16
692	  0	6234.8	757.9	 16
693	  0	105.5	16.6	 16
694	  0	5920.0	516.8	 16
695	  0	118.0	30.2	 16
696	  0	5900.8	438.5	 16
697	  0	100.0	16.9	 16
698	  0	5690.0	516.9	 16
699	  0	116.3	14.4	 16
700	  0	5865.8	453.2	 16
701	  0	122.5	27.9	 16
702	  0	6237.5	659.9	 16
703	  0	104.3	10.2	 16
704	  0	6389.8	903.6	 16
705	  0	114.5	14.1	 16
706	  0	6881.5	559.7	 16
707	  0	86.0	14.3	 16
708	  0	166.3	31.6	 16
709	  0	6307.3	442.6	 16
710	  0	197.8	19.7	 16
711	  0	6767.5	542.3	 16
  0	  1	7888.3	958.6	 16
  1	  1	125.8	20.1	 16
  2	  1	7380.0	714.6	 16
  3	  1	122.5	17.6	 16
  4	  1	85.3	13.7	 16
  5	  1	273.3	26.3	 16
  6	  1	131.0	15.9	 16
  7	  1	83.5	16.9	 16
  8	  1	224.5	32.3	 16
  9	  1	97.0	15.2	 16
 10	  1	120.3	19.3	 16
 11	  1	119.5	16.6	 16
 12	  1	106.8	13.6	 16
 13	  1	136.0	24.0	 16
 14	  1	187.8	17.1	 16
 15	  1	159.0	19.9	 16
 16	  1	198.5	131.6	 16
 17	  1	113.3	18.3	 16
 18	  1	95.3	20.0	 16
 19	  1	303.5	48.1	 16
 20	  1	158.5	24.9	 16
 21	  1	68.3	11.7	 16
 22	  1	187.3	33.8	 16
 23	  1	96.0	14.2	 16
 24	  1	265.0	27.8	 16
 25	  1	973.5	110.3	 16
 26	  1	162.5	36.8	 16
 27	  1	211.0	22.7	 16
 28	  1	159.0	23.9	 16
 29	  1	292.5	27.7	 16
 30	  1	109.3	16.8	 16
 31	  1	85.3	15.5	 16
 32	  1	125.5	18.4	 16
 33	  1	98.5	16.6	 16
 34	  1	292.0	37.3	 16
 35	  1	130.8	24.2	 16
 36	  1	190.5	32.4	 16
 37	  1	135.3	18.5	 16
 38	  1	223.5	31.3	 16
 39	  1	162.3	31.3	 16
 40	  1	174.5	27.5	 16
 41	  1	137.3	25.6	 16
 42	  1	798.8	67.5	 16
 43	  1	214.0	19.0	 16
 44	  1	145.3	22.9	 16
 45	  1	517.5	55.8	 16
 46	  1	139.5	58.5	 16
 47	  1	336.5	37.3	 16
 48	  1	152.5	35.8	 16
 49	  1	280.0	31.3	 16
 50	  1	187.3	29.5	 16
 51	  1	228.0	42.6	 16
 52	  1	310.3	32.5	 16
 53	  1	91.8	10.3	 16
 54	  1	97.0	13.2	 16
 55	  1	122.0	20.6	 16
 56	  1	158.0	23.8	 16
 57	  1	247.3	36.1	 16
 58	  1	749.8	85.8	 16
 59	  1	91.0	13.2	 16
 60	  1	116.8	15.9	 16
 61	  1	89.8	16.7	 16
 62	  1	149.5	23.4	 16
 63	  1	89.3	16.3	 16
 64	  1	150.5	28.1	 16
 65	  1	136.0	28.7	 16
 66	  1	267.3	31.8	 16
 67	  1	161.8	22.7	 16
 68	  1	274.5	30.3	 16
 69	  1	109.5	24.5	 16
 70	  1	104.0	14.6	 16
 71	  1	304.3	36.4	 16
 72	  1	143.3	24.1	 16
 73	  1	485.0	58.0	 16
 74	  1	307.8	33.7	 16
 75	  1	94.0	16.4	 16
 76	  1	131.8	21.5	 16
 77	  1	95.3	13.5	 16
 78	  1	136.8	21.1	 16
 79	  1	89.8	13.8	 16
 80	  1	119.3	15.9	 16
 81	  1	112.3	17.0	 16
 82	  1	397.5	113.5	 16
 83	  1	162.8	21.2	 16
 84	  1	154.0	22.8	 20
 85	  1	92.0	22.4	 16
 86	  1	91.3	13.8	 16
 87	  1	654.0	99.8	 16
 88	  1	159.5	20.6	 16
 89	  1	374.0	65.0	 16
 90	  1	109.0	12.3	 16
 91	  1	136.5	22.1	 16
 92	  1	87.0	15.8	 16
 93	  1	162.3	21.6	 16
 94	  1	184.5	24.4	 16
 95	  1	280.8	34.0	 16
 96	  1	89.8	17.8	 16
 97	  1	241.8	46.5	 16
 98	  1	115.3	15.4	 16
 99	  1	248.8	37.7	 16
100	  1	328.5	70.8	 16
101	  1	86.8	15.8	 16
102	  1	84.0	11.4	 16
103	  1	163.5	28.9	 16
104	  1	118.3	20.7	 16
105	  1	152.3	20.8	 16
106	  1	164.0	23.7	 16
107	  1	148.5	22.2	 16
108	  1	99.8	17.0	 16
109	  1	91.8	17.6	 16
110	  1	115.3	22.3	 16
111	  1	230.5	31.1	 16
112	  1	170.5	23.2	 16
113	  1	169.8	19.2	 16
114	  1	235.8	33.0	 16
115	  1	101.0	13.6	 16
116	  1	186.5	28.5	 16
117	  1	138.5	13.7	 16
118	  1	105.8	21.0	 16
119	  1	238.0	36.9	 16
120	  1	314.5	37.0	 16
121	  1	169.5	82.7	 16
122	  1	221.5	55.3	 16
123	  1	148.3	21.6	 16
124	  1	133.0	16.3	 16
125	  1	136.0	20.4	 16
126	  1	177.8	21.4	 16
127	  1	143.8	17.2	 16
128	  1	212.3	44.2	 16
129	  1	85.0	13.2	 16
130	  1	167.8	18.8	 16
131	  1	144.8	18.2	 16
132	  1	153.8	24.2	 16
133	  1	186.0	17.4	 16
134	  1	201.3	27.9	 16
135	  1	174.5	18.3	 16
136	  1	114.0	19.6	 16
137	  1	100.3	42.1	 16
138	  1	97.3	11.0	 16
139	  1	117.0	20.4	 16
140	  1	81.5	13.1	 16
141	  1	88.0	14.6	 16
142	  1	314.3	46.5	 16
143	  1	156.0	14.3	 16
144	  1	398.3	39.8	 16
145	  1	555.0	118.9	 16
146	  1	285.5	30.5	 16
147	  1	112.3	22.0	 16
148	  1	803.5	101.5	 16
149	  1	123.0	12.4	 16
150	  1	117.3	11.3	 16
151	  1	100.3	20.8	 16
152	  1	199.3	26.4	 16
153	  1	195.0	26.1	 16
154	  1	92.5	18.6	 16
155	  1	95.0	15.7	 16
156	  1	538.5	70.0	 16
157	  1	389.8	44.7	 16
158	  1	110.5	17.5	 16
159	  1	131.3	19.2	 16
160	  1	172.0	20.1	 16
161	  1	332.5	44.5	 16
162	  1	152.0	18.4	 16
163	  1	254.3	28.4	 16
164	  1	446.0	58.6	 16
165	  1	171.3	30.0	 16
166	  1	178.0	23.4	 16
167	  1	304.3	31.6	 16
168	  1	110.0	18.9	 16
169	  1	81.0	11.6	 16
170	  1	197.8	44.9	 16
171	  1	122.8	22.0	 16
172	  1	281.3	33.1	 16
173	  1	129.5	17.1	 16
174	  1	107.0	12.6	 16
175	  1	967.5	88.1	 16
176	  1	206.3	18.5	 16
177	  1	172.5	31.6	 16
178	  1	147.5	20.9	 16
179	  1	159.5	29.7	 16
180	  1	212.0	26.5	 16
181	  1	236.5	25.3	 16
182	  1	101.0	9.6	 16
183	  1	152.3	24.3	 16
184	  1	94.0	44.9	 16
185	  1	96.5	14.6	 16
186	  1	131.8	12.4	 16
187	  1	221.0	20.7	 16
188	  1	110.5	21.1	 16
189	  1	674.3	76.3	 16
190	  1	112.5	16.1	 16
191	  1	111.3	19.2	 16
192	  1	284.8	38.5	 16
193	  1	184.3	23.7	 16
194	  1	132.3	27.1	 16
195	  1	203.3	23.9	 16
196	  1	186.0	30.9	 16
197	  1	102.3	14.7	 16
198	  1	136.3	21.6	 16
199	  1	207.0	27.3	 16
200	  1	159.0	16.1	 16
201	  1	121.0	19.8	 16
202	  1	361.5	26.6	 16
203	  1	183.5	24.4	 16
204	  1	81.5	15.7	 16
205	  1	129.5	19.1	 16
206	  1	335.3	31.0	 16
207	  1	151.0	16.7	 16
208	  1	90.8	12.1	 16
209	  1	106.0	12.3	 16
210	  1	101.0	14.0	 16
211	  1	436.3	50.2	 16
212	  1	78.3	12.5	 16
213	  1	93.3	16.1	 16
214	  1	125.8	17.6	 16
215	  1	150.3	23.3	 16
216	  1	105.0	55.1	 16
217	  1	661.0	59.2	 16
218	  1	220.0	21.4	 16
219	  1	155.3	31.9	 16
220	  1	99.3	18.7	 16
221	  1	229.8	58.6	 16
222	  1	103.5	14.3	 16
223	  1	416.0	51.9	 16
224	  1	82.0	24.0	 16
225	  1	72.8	8.3	 16
226	  1	203.8	21.3	 16
227	  1	156.0	26.7	 20
228	  1	259.0	54.2	 16
229	  1	225.3	43.1	 16
230	  1	331.0	41.3	 16
231	  1	138.0	31.3	 16
232	  1	93.8	15.8	 16
233	  1	139.8	20.1	 16
234	  1	133.3	24.0	 16
235	  1	69.3	17.1	 16
236	  1	1273.8	290.4	 16
237	  1	78.5	24.2	 16
238	  1	89.5	16.9	 16
239	  1	64.3	6.5	 16
240	  1	154.5	26.8	 16
241	  1	127.0	16.9	 16
242	  1	99.0	12.7	 16
243	  1	169.8	26.4	 16
244	  1	240.8	33.9	 16
245	  1	212.5	32.1	 16
246	  1	140.3	17.1	 16
247	  1	186.3	34.9	 16
248	  1	80.0	12.2	 16
249	  1	97.3	14.6	 16
250	  1	96.0	14.7	 16
251	  1	106.5	19.5	 16
252	  1	79.5	14.2	 16
253	  1	172.0	28.3	 16
254	  1	77.5	11.6	 16
255	  1	81.0	13.2	 16
256	  1	204.3	26.1	 16
257	  1	84.5	16.3	 16
258	  1	108.5	21.9	 16
259	  1	270.3	54.3	 16
260	  1	95.0	20.6	 16
261	  1	206.0	21.4	 16
262	  1	87.3	15.4	 16
263	  1	114.0	21.3	 16
264	  1	171.5	16.3	 16
265	  1	250.3	27.2	 16
266	  1	92.0	14.5	 16
267	  1	164.5	22.5	 16
268	  1	164.8	18.3	 16
269	  1	92.8	15.0	 16
270	  1	90.8	8.7	 16
271	  1	78.8	10.3	 16
272	  1	82.8	13.4	 16
273	  1	717.0	77.3	 16
274	  1	94.3	83.6	 16
275	  1	185.5	57.9	 16
276	  1	1225.0	70.1	 16
277	  1	129.5	24.9	 16
278	  1	111.3	14.9	 16
279	  1	219.3	24.6	 16
280	  1	83.5	7.4	 16
281	  1	164.5	24.1	 16
282	  1	171.5	25.1	 16
283	  1	212.3	19.6	 16
284	  1	104.3	18.6	 16
285	  1	194.5	24.7	 16
286	  1	178.3	20.7	 16
287	  1	116.8	16.8	 16
288	  1	95.3	12.1	 16
289	  1	207.3	27.0	 16
290	  1	191.5	16.3	 16
291	  1	87.5	13.9	 16
292	  1	318.3	34.1	 16
293	  1	239.3	27.5	 16
294	  1	160.5	22.4	 16
295	  1	116.8	12.4	 16
296	  1	85.0	11.3	 16
297	  1	98.5	13.2	 16
298	  1	146.3	20.8	 16
299	  1	92.8	28.0	 16
300	  1	71.3	10.5	 16
301	  1	82.0	13.3	 16
302	  1	87.3	17.5	 16
303	  1	203.5	34.6	 16
304	  1	74.0	14.6	 16
305	  1	182.0	23.7	 16
306	  1	272.5	38.5	 16
307	  1	115.8	23.4	 16
308	  1	139.0	23.7	 16
309	  1	143.0	19.1	 16
310	  1	114.0	12.7	 16
311	  1	252.0	37.5	 16
312	  1	147.0	22.9	 16
313	  1	139.3	24.4	 16
314	  1	475.0	49.6	 16
315	  1	227.0	25.6	 16
316	  1	127.5	38.8	 16
317	  1	145.5	20.1	 16
318	  1	109.0	13.3	 16
319	  1	171.8	33.6	 16
320	  1	188.3	18.9	 16
321	  1	191.3	16.7	 16
322	  1	113.3	16.5	 16
323	  1	134.3	16.3	 16
324	  1	135.3	18.4	 16
325	  1	76.0	14.6	 16
326	  1	104.3	17.2	 16
327	  1	89.0	15.9	 16
328	  1	177.5	18.3	 16
329	  1	490.0	28.1	 16
330	  1	158.8	25.1	 16
331	  1	150.8	21.8	 16
332	  1	283.3	29.8	 16
333	  1	298.3	36.3	 16
334	  1	109.8	14.6	 16
335	  1	905.0	100.8	 16
336	  1	164.3	21.2	 16
337	  1	383.8	60.8	 16
338	  1	98.3	16.0	 16
339	  1	80.8	9.1	 16
340	  1	197.3	22.2	 16
341	  1	116.5	13.1	 16
342	  1	221.3	18.1	 16
343	  1	171.0	29.4	 16
344	  1	151.5	23.0	 16
345	  1	416.3	38.3	 16
346	  1	119.8	16.3	 16
347	  1	355.3	42.0	 16
348	  1	423.0	50.7	 16
349	  1	229.3	38.8	 16
350	  1	96.3	14.7	 16
351	  1	78.5	9.5	 16
352	  1	254.0	33.1	 16
353	  1	132.0	21.8	 16
354	  1	9261.5	794.0	 16
355	  1	764.8	79.6	 16
356	  1	437.0	39.1	 16
357	  1	102.3	13.8	 16
358	  1	130.3	20.3	 16
359	  1	125.3	17.2	 16
360	  1	82.3	7.7	 16
361	  1	80.8	13.6	 16
362	  1	80.8	12.5	 16
363	  1	99.8	12.8	 16
364	  1	92.8	11.6	 16
365	  1	79.3	13.3	 16
366	  1	128.3	18.8	 16
367	  1	152.5	33.1	 16
368	  1	286.0	58.8	 16
369	  1	109.3	16.6	 20
370	  1	103.0	20.2	 16
371	  1	7662.8	1437.8	 16
372	  1	138.0	23.1	 16
373	  1	566.8	94.4	 16
374	  1	119.0	22.8	 16
375	  1	127.5	19.9	 16
376	  1	164.0	32.1	 16
377	  1	155.3	17.9	 16
378	  1	339.0	32.6	 16
379	  1	320.8	43.1	 16
380	  1	124.3	17.9	 16
381	  1	286.3	24.3	 16
382	  1	387.8	42.7	 16
383	  1	352.0	41.3	 16
384	  1	327.8	59.9	 16
385	  1	97.3	17.7	 16
386	  1	117.0	16.4	 16
387	  1	95.0	14.7	 16
388	  1	87.3	16.2	 16
389	  1	78.5	8.7	 16
390	  1	156.8	30.6	 16
391	  1	118.3	12.9	 16
392	  1	103.3	20.6	 16
393	  1	73.5	11.9	 16
394	  1	91.0	13.7	 16
395	  1	252.3	32.4	 16
396	  1	341.8	30.0	 16
397	  1	158.8	20.1	 16
398	  1	194.3	26.5	 16
399	  1	172.5	23.4	 16
400	  1	189.8	34.8	 16
401	  1	112.3	27.6	 16
402	  1	192.0	17.5	 16
403	  1	216.8	29.2	 16
404	  1	674.5	50.8	 16
405	  1	606.0	62.5	 16
406	  1	268.5	73.1	 16
407	  1	134.0	24.5	 16
408	  1	208.5	20.8	 16
409	  1	163.0	24.7	 16
410	  1	176.3	35.6	 16
411	  1	279.8	43.8	 16
412	  1	457.5	55.4	 16
413	  1	225.0	29.9	 16
414	  1	158.0	19.9	 16
415	  1	113.3	13.4	 16
416	  1	104.5	19.0	 16
417	  1	283.8	25.8	 16
418	  1	173.3	23.0	 16
419	  1	144.8	18.8	 16
420	  1	327.3	35.1	 16
421	  1	176.0	21.8	 16
422	  1	239.3	26.7	 16
423	  1	319.5	36.6	 16
424	  1	114.3	18.2	 16
425	  1	143.5	20.8	 16
426	  1	179.8	21.9	 16
427	  1	111.3	18.8	 16
428	  1	97.5	18.0	 16
429	  1	257.8	36.1	 16
430	  1	78.0	9.7	 16
431	  1	185.5	19.1	 16
432	  1	132.3	18.9	 16
433	  1	187.3	25.1	 16
434	  1	217.3	30.8	 16
435	  1	91.0	16.4	 16
436	  1	99.8	20.9	 16
437	  1	73.5	72.3	 16
438	  1	98.3	15.0	 16
439	  1	559.0	45.8	 16
440	  1	79.0	12.7	 16
441	  1	152.3	19.5	 16
442	  1	204.3	18.4	 16
443	  1	84.0	12.5	 16
444	  1	109.0	17.8	 16
445	  1	113.0	18.8	 16
446	  1	88.3	13.9	 16
447	  1	77.5	13.4	 16
448	  1	103.8	19.5	 16
449	  1	80.3	10.4	 16
450	  1	121.3	15.8	 16
451	  1	172.5	21.5	 16
452	  1	473.0	43.4	 16
453	  1	360.3	58.7	 16
454	  1	165.0	24.3	 16
455	  1	88.3	10.6	 16
456	  1	579.3	51.9	 16
457	  1	1015.3	61.6	 16
458	  1	125.3	14.6	 16
459	  1	97.5	18.6	 16
460	  1	358.5	26.6	 16
461	  1	231.8	30.2	 16
462	  1	88.3	17.0	 16
463	  1	99.8	11.7	 16
464	  1	174.3	16.5	 16
465	  1	604.0	43.6	 16
466	  1	226.5	19.5	 16
467	  1	231.0	17.8	 16
468	  1	221.3	23.5	 16
469	  1	103.0	17.0	 16
470	  1	276.0	36.1	 16
471	  1	84.5	11.8	 16
472	  1	67.5	9.5	 16
473	  1	2147.8	273.5	 16
474	  1	65.5	13.1	 16
475	  1	81.0	10.7	 16
476	  1	65.0	11.1	 16
477	  1	221.5	27.7	 16
478	  1	126.5	13.2	 16
479	  1	87.3	9.0	 16
480	  1	77.0	13.2	 16
481	  1	93.0	25.5	 16
482	  1	719.5	80.8	 16
483	  1	169.3	29.4	 16
484	  1	112.0	19.5	 16
485	  1	286.5	33.6	 16
486	  1	71.3	15.2	 16
487	  1	84.5	9.7	 16
488	  1	90.8	15.8	 16
489	  1	104.5	18.5	 16
490	  1	317.0	44.1	 16
491	  1	126.3	14.8	 16
492	  1	79.8	12.4	 16
493	  1	155.5	20.1	 16
494	  1	155.5	18.7	 16
495	  1	159.0	22.7	 16
496	  1	225.0	24.2	 16
497	  1	196.3	25.1	 16
498	  1	87.0	20.0	 16
499	  1	80.5	12.4	 16
500	  1	87.3	15.1	 16
501	  1	125.5	25.1	 16
502	  1	289.5	42.4	 16
503	  1	102.5	13.9	 16
504	  1	98.0	14.7	 16
505	  1	83.5	14.5	 16
506	  1	307.0	33.8	 16
507	  1	160.5	16.8	 16
508	  1	126.0	18.7	 16
509	  1	161.5	20.5	 16
510	  1	295.5	34.6	 16
511	  1	248.3	29.2	 16
512	  1	93.8	13.0	 20
513	  1	853.0	209.2	 16
514	  1	102.5	18.5	 16
515	  1	138.0	17.8	 16
516	  1	99.3	26.8	 16
517	  1	147.5	26.6	 16
518	  1	625.8	109.6	 16
519	  1	396.0	70.4	 16
520	  1	118.0	24.1	 16
521	  1	71.5	11.5	 16
522	  1	480.3	79.0	 16
523	  1	141.0	22.5	 16
524	  1	371.3	42.6	 16
525	  1	534.0	90.0	 16
526	  1	239.3	44.8	 16
527	  1	132.5	21.1	 16
528	  1	88.3	12.3	 16
529	  1	219.3	34.0	 16
530	  1	576.0	107.6	 16
531	  1	87.5	14.9	 16
532	  1	81.5	21.2	 16
533	  1	115.0	15.4	 16
534	  1	201.0	30.5	 16
535	  1	185.8	34.5	 16
536	  1	85.5	16.4	 16
537	  1	93.0	12.8	 16
538	  1	144.8	28.7	 16
539	  1	90.3	12.1	 16
540	  1	165.0	17.5	 16
541	  1	113.8	13.4	 16
542	  1	710.3	60.9	 16
543	  1	183.0	24.2	 16
544	  1	196.5	24.6	 16
545	  1	89.5	11.7	 16
546	  1	296.5	35.3	 16
547	  1	359.3	34.8	 16
548	  1	83.3	15.5	 16
549	  1	78.3	9.6	 16
550	  1	241.8	50.8	 16
551	  1	125.0	13.6	 16
552	  1	97.0	12.9	 16
553	  1	148.0	24.4	 16
554	  1	86.8	33.5	 16
555	  1	88.3	11.8	 16
556	  1	105.0	19.3	 16
557	  1	226.3	28.9	 16
558	  1	195.3	18.4	 16
559	  1	904.8	79.7	 16
560	  1	3295.0	149.3	 16
561	  1	133.3	17.6	 16
562	  1	397.3	42.6	 16
563	  1	113.0	18.6	 16
564	  1	142.0	15.9	 16
565	  1	116.0	19.2	 16
566	  1	185.0	18.5	 16
567	  1	87.3	8.1	 16
568	  1	891.5	113.3	 16
569	  1	168.3	31.1	 16
570	  1	108.8	19.8	 16
571	  1	77.3	12.2	 16
572	  1	74.0	16.2	 16
573	  1	150.8	18.6	 16
574	  1	109.8	36.9	 16
575	  1	72.8	10.0	 16
576	  1	113.3	14.4	 16
577	  1	90.8	18.6	 16
578	  1	130.0	20.5	 16
579	  1	187.3	34.4	 16
580	  1	208.3	21.1	 16
581	  1	93.3	18.5	 16
582	  1	210.0	35.5	 16
583	  1	261.5	32.5	 16
584	  1	199.8	24.5	 16
585	  1	168.5	21.6	 16
586	  1	183.0	27.1	 16
587	  1	99.0	9.4	 16
588	  1	127.8	18.3	 16
589	  1	190.8	27.4	 16
590	  1	164.8	19.3	 16
591	  1	84.8	14.2	 16
592	  1	293.0	38.3	 16
593	  1	112.8	22.9	 16
594	  1	173.5	36.6	 16
595	  1	199.5	32.2	 16
596	  1	458.0	110.1	 16
597	  1	410.8	64.8	 16
598	  1	271.5	44.8	 16
599	  1	272.0	31.3	 16
600	  1	280.5	32.4	 16
601	  1	232.8	32.1	 16
602	  1	245.5	26.9	 16
603	  1	150.8	22.1	 16
604	  1	513.8	53.8	 16
605	  1	72.8	12.7	 16
606	  1	104.3	17.5	 16
607	  1	159.5	25.2	 16
608	  1	297.8	73.7	 16
609	  1	3008.0	329.4	 16
610	  1	234.8	23.7	 16
611	  1	281.0	25.0	 16
612	  1	102.0	15.9	 16
613	  1	118.3	18.3	 16
614	  1	101.8	15.4	 16
615	  1	102.3	14.4	 16
616	  1	159.0	18.9	 16
617	  1	285.8	35.0	 16
618	  1	171.5	31.4	 16
619	  1	98.5	13.1	 16
620	  1	135.5	21.7	 16
621	  1	121.3	20.2	 16
622	  1	144.5	15.5	 16
623	  1	146.0	22.2	 16
624	  1	133.3	17.6	 16
625	  1	103.0	18.6	 16
626	  1	394.0	43.2	 16
627	  1	216.3	25.1	 16
628	  1	319.5	20.9	 16
629	  1	139.3	44.2	 16
630	  1	170.3	20.3	 16
631	  1	667.0	94.0	 16
632	  1	992.5	131.1	 16
633	  1	997.3	98.9	 16
634	  1	97.8	15.7	 16
635	  1	89.3	17.1	 16
636	  1	100.0	19.3	 16
637	  1	198.8	41.6	 16
638	  1	123.3	19.4	 16
639	  1	184.3	27.9	 16
640	  1	118.5	17.4	 16
641	  1	154.3	18.2	 16
642	  1	108.0	21.1	 16
643	  1	492.0	75.8	 16
644	  1	935.3	182.8	 16
645	  1	97.5	19.6	 16
646	  1	87.0	13.1	 16
647	  1	107.3	13.9	 16
648	  1	96.8	16.2	 16
649	  1	93.5	12.8	 16
650	  1	116.3	20.7	 16
651	  1	73.3	13.0	 16
652	  1	149.8	26.7	 16
653	  1	95.3	13.1	 16
654	  1	104.3	19.4	 20
655	  1	318.3	41.8	 16
656	  1	80.0	17.0	 16
657	  1	297.0	43.0	 16
658	  1	82.5	13.4	 16
659	  1	376.0	51.1	 16
660	  1	88.0	14.0	 16
661	  1	100.0	23.2	 16
662	  1	96.5	18.7	 16
663	  1	238.5	30.8	 16
664	  1	125.3	16.0	 16
665	  1	88.5	15.3	 16
666	  1	83.8	16.6	 16
667	  1	1146.3	121.1	 16
668	  1	208.0	26.9	 16
669	  1	222.0	34.3	 16
670	  1	114.0	18.3	 16
671	  1	91.0	10.7	 16
672	  1	212.8	18.1	 16
673	  1	139.8	21.6	 16
674	  1	171.0	18.0	 16
675	  1	352.3	25.8	 16
676	  1	182.8	19.9	 16
677	  1	140.8	29.7	 16
678	  1	117.5	18.2	 16
679	  1	103.8	15.6	 16
680	  1	2041.3	269.4	 16
681	  1	77.5	10.7	 16
682	  1	164.5	28.1	 16
683	  1	126.8	14.3	 16
684	  1	426.8	33.7	 16
685	  1	122.0	17.6	 16
686	  1	208.0	29.3	 16
687	  1	499.8	72.4	 16
688	  1	90.3	12.5	 16
689	  1	284.5	54.2	 16
690	  1	107.3	29.6	 16
691	  1	1249.0	250.4	 16
692	  1	927.0	163.2	 16
693	  1	92.5	12.7	 16
694	  1	113.3	13.8	 16
695	  1	98.0	14.4	 16
696	  1	108.3	29.9	 16
697	  1	82.3	10.9	 16
698	  1	76.3	11.6	 16
699	  1	87.8	13.7	 16
700	  1	85.3	16.8	 16
701	  1	88.5	13.9	 16
702	  1	189.3	21.1	 16
703	  1	189.8	18.5	 16
704	  1	219.3	21.6	 16
705	  1	156.3	17.0	 16
706	  1	84.0	12.3	 16
707	  1	68.3	10.6	 16
708	  1	6005.5	472.7	 16
709	  1	143.8	16.8	 16
710	  1	5853.0	395.1	 16
711	  1	126.3	20.5	 16
  0	  2	116.5	20.1	 16
  1	  2	7336.0	900.5	 16
  2	  2	113.8	18.9	 16
  3	  2	7055.5	698.8	 16
  4	  2	68.3	13.5	 16
  5	  2	257.5	23.1	 16
  6	  2	126.8	30.2	 16
  7	  2	85.5	15.7	 16
  8	  2	188.8	32.4	 16
  9	  2	102.3	17.1	 16
 10	  2	107.8	17.0	 16
 11	  2	143.5	24.6	 16
 12	  2	83.0	15.2	 16
 13	  2	115.0	14.2	 16
 14	  2	238.5	31.6	 16
 15	  2	258.0	32.4	 16
 16	  2	243.0	29.0	 16
 17	  2	118.8	18.6	 16
 18	  2	74.8	10.6	 16
 19	  2	309.0	33.2	 16
 20	  2	92.5	13.6	 16
 21	  2	75.0	13.4	 16
 22	  2	97.3	13.6	 16
 23	  2	96.0	16.6	 16
 24	  2	352.8	45.4	 16
 25	  2	780.0	69.2	 16
 26	  2	106.5	22.4	 16
 27	  2	234.3	50.9	 16
 28	  2	287.5	35.6	 16
 29	  2	227.5	31.4	 16
 30	  2	143.0	21.6	 16
 31	  2	92.8	19.6	 16
 32	  2	147.3	22.0	 16
 33	  2	98.5	16.9	 16
 34	  2	393.5	60.2	 16
 35	  2	117.8	11.4	 16
 36	  2	316.8	27.4	 16
 37	  2	102.0	12.5	 16
 38	  2	111.8	35.1	 16
 39	  2	185.0	17.7	 16
 40	  2	198.8	21.3	 16
 41	  2	120.3	12.9	 16
 42	  2	298.3	37.4	 16
 43	  2	164.0	22.5	 16
 44	  2	103.3	9.6	 16
 45	  2	342.3	57.8	 16
 46	  2	108.5	21.1	 16
 47	  2	246.0	28.7	 16
 48	  2	135.5	13.9	 16
 49	  2	251.8	40.2	 16
 50	  2	211.0	42.5	 16
 51	  2	207.3	23.3	 16
 52	  2	157.8	22.0	 16
 53	  2	83.5	17.2	 16
 54	  2	93.5	11.0	 16
 55	  2	108.0	17.2	 16
 56	  2	200.3	16.6	 16
 57	  2	263.3	33.5	 16
 58	  2	228.3	39.6	 16
 59	  2	80.0	14.2	 16
 60	  2	109.3	16.1	 16
 61	  2	92.3	14.2	 16
 62	  2	106.3	14.3	 16
 63	  2	106.5	25.0	 16
 64	  2	119.0	22.9	 16
 65	  2	147.3	22.0	 16
 66	  2	155.8	17.0	 16
 67	  2	141.0	19.2	 16
 68	  2	188.3	22.1	 16
 69	  2	88.0	13.3	 16
 70	  2	122.0	16.6	 16
 71	  2	118.0	14.2	 16
 72	  2	88.8	14.1	 16
 73	  2	163.5	21.7	 16
 74	  2	122.3	18.2	 16
 75	  2	76.5	9.0	 16
 76	  2	100.0	14.7	 16
 77	  2	104.3	11.2	 16
 78	  2	91.5	13.6	 16
 79	  2	91.3	12.0	 16
 80	  2	70.8	12.0	 16
 81	  2	169.3	18.6	 16
 82	  2	328.3	42.3	 16
 83	  2	194.0	24.4	 16
 84	  2	146.8	21.2	 16
 85	  2	86.8	11.8	 16
 86	  2	93.3	14.6	 16
 87	  2	230.3	32.7	 16
 88	  2	126.3	18.1	 16
 89	  2	345.0	34.2	 16
 90	  2	104.0	12.2	 16
 91	  2	112.5	18.5	 16
 92	  2	89.5	14.9	 16
 93	  2	116.0	13.1	 16
 94	  2	154.0	23.1	 20
 95	  2	249.5	37.9	 16
 96	  2	95.0	12.4	 16
 97	  2	105.3	16.8	 16
 98	  2	115.5	16.5	 16
 99	  2	292.8	41.7	 16
100	  2	280.8	49.1	 16
101	  2	84.8	16.4	 16
102	  2	86.0	14.2	 16
103	  2	93.5	19.7	 16
104	  2	96.5	16.1	 16
105	  2	408.3	41.2	 16
106	  2	100.3	14.0	 16
107	  2	108.8	20.1	 16
108	  2	91.5	15.6	 16
109	  2	80.5	14.1	 16
110	  2	129.3	23.2	 16
111	  2	255.5	50.6	 16
112	  2	185.5	26.3	 16
113	  2	106.3	12.1	 16
114	  2	130.0	15.8	 16
115	  2	104.3	15.1	 16
116	  2	149.0	22.1	 16
117	  2	107.3	12.2	 16
118	  2	126.8	140.3	 16
119	  2	275.3	34.4	 16
120	  2	115.8	16.1	 16
121	  2	128.3	19.0	 16
122	  2	82.3	9.0	 16
123	  2	122.3	22.1	 16
124	  2	108.8	15.4	 16
125	  2	160.5	21.5	 16
126	  2	173.3	29.4	 16
127	  2	258.0	41.3	 16
128	  2	297.5	49.6	 16
129	  2	80.3	8.3	 16
130	  2	220.0	23.1	 16
131	  2	130.0	19.9	 16
132	  2	190.0	24.4	 16
133	  2	282.8	28.6	 16
134	  2	171.8	24.3	 16
135	  2	100.5	21.4	 16
136	  2	135.3	16.6	 16
137	  2	91.3	9.0	 16
138	  2	95.0	15.3	 16
139	  2	96.3	14.1	 16
140	  2	88.5	23.6	 16
141	  2	86.0	13.7	 16
142	  2	388.3	44.3	 16
143	  2	138.8	25.8	 16
144	  2	343.5	34.4	 16
145	  2	120.0	26.9	 16
146	  2	132.3	18.9	 16
147	  2	106.5	15.0	 16
148	  2	329.8	28.7	 16
149	  2	139.3	19.6	 16
150	  2	95.5	19.6	 16
151	  2	103.3	18.9	 16
152	  2	119.5	19.3	 16
153	  2	119.0	15.3	 16
154	  2	104.5	14.6	 16
155	  2	99.3	8.3	 16
156	  2	172.3	24.9	 16
157	  2	220.3	18.6	 16
158	  2	96.3	16.3	 16
159	  2	154.3	18.9	 16
160	  2	331.8	28.9	 16
161	  2	315.5	28.0	 16
162	  2	87.8	14.5	 16
163	  2	142.3	22.4	 16
164	  2	186.0	19.2	 16
165	  2	150.0	18.6	 16
166	  2	174.3	22.6	 16
167	  2	282.3	31.3	 16
168	  2	90.8	20.4	 16
169	  2	76.0	15.2	 16
170	  2	173.8	26.8	 16
171	  2	86.0	12.2	 16
172	  2	134.5	24.1	 16
173	  2	113.5	14.8	 16
174	  2	140.5	25.8	 16
175	  2	242.5	40.9	 16
176	  2	196.3	22.1	 16
177	  2	75.8	12.2	 16
178	  2	181.3	13.8	 16
179	  2	149.3	25.4	 16
180	  2	93.0	14.1	 16
181	  2	98.3	18.7	 16
182	  2	93.0	15.2	 16
183	  2	94.8	11.4	 16
184	  2	104.3	20.3	 16
185	  2	78.0	12.6	 16
186	  2	105.8	17.0	 16
187	  2	165.0	23.4	 16
188	  2	108.5	19.4	 16
189	  2	148.5	19.3	 16
190	  2	224.5	33.5	 16
191	  2	96.0	12.7	 16
192	  2	266.0	31.3	 16
193	  2	332.8	38.5	 16
194	  2	127.0	14.9	 16
195	  2	386.8	101.3	 16
196	  2	153.5	21.5	 16
197	  2	83.8	14.4	 16
198	  2	106.0	26.4	 16
199	  2	233.0	26.1	 16
200	  2	129.0	20.6	 16
201	  2	76.8	13.1	 16
202	  2	183.3	21.3	 16
203	  2	166.0	22.4	 16
204	  2	66.5	7.4	 16
205	  2	110.5	22.0	 16
206	  2	267.8	44.6	 16
207	  2	145.8	20.7	 16
208	  2	81.3	11.6	 16
209	  2	88.0	16.6	 16
210	  2	92.5	12.8	 16
211	  2	87.8	12.8	 16
212	  2	71.3	13.0	 16
213	  2	82.5	13.0	 16
214	  2	136.0	14.2	 16
215	  2	114.5	18.7	 16
216	  2	103.5	19.3	 16
217	  2	280.5	38.1	 16
218	  2	293.8	29.8	 16
219	  2	125.3	17.2	 16
220	  2	88.5	8.8	 16
221	  2	208.8	32.0	 16
222	  2	89.8	11.3	 16
223	  2	132.5	27.0	 16
224	  2	78.3	10.4	 16
225	  2	78.3	12.4	 16
226	  2	127.3	16.6	 16
227	  2	130.5	18.9	 16
228	  2	100.8	14.1	 16
229	  2	82.5	14.5	 16
230	  2	279.8	37.4	 16
231	  2	81.5	18.8	 16
232	  2	72.8	7.9	 16
233	  2	105.3	21.0	 16
234	  2	87.3	12.3	 16
235	  2	55.8	7.2	 16
236	  2	587.5	148.6	 20
237	  2	64.0	11.1	 16
238	  2	79.0	17.8	 16
239	  2	71.0	12.2	 16
240	  2	102.0	15.1	 16
241	  2	92.8	11.9	 16
242	  2	89.0	17.3	 16
243	  2	148.8	27.8	 16
244	  2	200.3	23.6	 16
245	  2	230.3	26.1	 16
246	  2	245.5	26.2	 16
247	  2	231.0	34.9	 16
248	  2	79.3	11.2	 16
249	  2	90.3	17.4	 16
250	  2	97.3	14.2	 16
251	  2	109.0	19.4	 16
252	  2	71.3	8.2	 16
253	  2	98.0	15.4	 16
254	  2	65.0	6.5	 16
255	  2	76.0	9.3	 16
256	  2	116.3	11.8	 16
257	  2	77.5	13.2	 16
258	  2	105.3	13.1	 16
259	  2	90.3	15.8	 16
260	  2	97.8	14.0	 16
261	  2	99.5	13.3	 16
262	  2	88.3	12.6	 16
263	  2	108.5	16.1	 16
264	  2	219.3	34.2	 16
265	  2	110.0	22.4	 16
266	  2	83.8	14.0	 16
267	  2	366.3	37.4	 16
268	  2	230.0	25.3	 16
269	  2	84.0	13.6	 16
270	  2	100.0	17.1	 16
271	  2	88.3	13.1	 16
272	  2	86.0	10.5	 16
273	  2	209.8	21.6	 16
274	  2	84.0	8.9	 16
275	  2	245.0	70.8	 16
276	  2	365.3	50.6	 16
277	  2	104.3	18.4	 16
278	  2	117.5	22.7	 16
279	  2	384.8	22.6	 16
280	  2	85.3	13.0	 16
281	  2	97.5	12.3	 16
282	  2	93.3	12.8	 16
283	  2	217.8	36.1	 16
284	  2	104.8	19.0	 16
285	  2	180.5	24.9	 16
286	  2	181.3	40.3	 16
287	  2	96.3	14.0	 16
288	  2	86.0	18.7	 16
289	  2	181.8	20.6	 16
290	  2	163.3	23.4	 16
291	  2	96.8	14.5	 16
292	  2	477.3	43.4	 16
293	  2	322.5	23.8	 16
294	  2	152.0	32.6	 16
295	  2	118.0	19.1	 16
296	  2	94.3	14.5	 16
297	  2	99.0	13.8	 16
298	  2	150.0	15.8	 16
299	  2	79.3	14.3	 16
300	  2	80.5	15.3	 16
301	  2	77.3	11.1	 16
302	  2	82.0	10.4	 16
303	  2	200.8	26.0	 16
304	  2	81.5	39.1	 16
305	  2	80.5	11.7	 16
306	  2	122.3	17.7	 16
307	  2	89.0	21.3	 16
308	  2	106.5	14.4	 16
309	  2	119.3	19.9	 16
310	  2	74.3	11.7	 16
311	  2	191.3	21.2	 16
312	  2	84.8	14.1	 16
313	  2	174.3	25.3	 16
314	  2	136.3	19.5	 16
315	  2	123.3	15.3	 16
316	  2	76.3	12.5	 16
317	  2	169.0	16.5	 16
318	  2	104.5	14.6	 16
319	  2	151.0	22.7	 16
320	  2	171.3	25.0	 16
321	  2	176.3	16.2	 16
322	  2	90.5	12.2	 16
323	  2	92.3	10.7	 16
324	  2	99.8	15.1	 16
325	  2	104.0	18.3	 16
326	  2	81.8	9.7	 16
327	  2	100.0	21.4	 16
328	  2	145.5	25.3	 16
329	  2	780.5	51.2	 16
330	  2	147.3	21.9	 16
331	  2	140.0	24.9	 16
332	  2	71.5	11.1	 16
333	  2	184.3	22.0	 16
334	  2	194.8	28.7	 16
335	  2	136.8	24.5	 16
336	  2	180.5	29.1	 16
337	  2	125.8	18.2	 16
338	  2	89.5	13.1	 16
339	  2	83.0	13.1	 16
340	  2	71.5	12.6	 16
341	  2	100.3	14.5	 16
342	  2	219.0	25.0	 16
343	  2	178.0	21.5	 16
344	  2	136.5	15.1	 16
345	  2	480.0	51.9	 16
346	  2	153.0	19.1	 16
347	  2	339.0	21.8	 16
348	  2	524.3	36.3	 16
349	  2	516.0	65.0	 16
350	  2	99.5	20.1	 16
351	  2	80.3	19.2	 16
352	  2	205.8	22.5	 16
353	  2	90.5	13.8	 16
354	  2	3191.5	529.6	 16
355	  2	233.8	19.7	 16
356	  2	215.3	20.6	 16
357	  2	202.3	25.6	 16
358	  2	88.0	12.2	 16
359	  2	112.3	20.0	 16
360	  2	78.8	13.7	 16
361	  2	71.5	12.5	 16
362	  2	80.3	15.7	 16
363	  2	80.3	11.4	 16
364	  2	83.0	13.1	 16
365	  2	69.3	13.2	 16
366	  2	79.3	36.7	 16
367	  2	100.3	23.8	 16
368	  2	74.0	11.5	 16
369	  2	88.3	16.1	 16
370	  2	72.3	10.6	 16
371	  2	2312.5	346.6	 16
372	  2	119.0	18.6	 16
373	  2	179.0	68.6	 16
374	  2	122.3	14.7	 16
375	  2	83.0	12.9	 16
376	  2	200.8	35.1	 16
377	  2	93.5	19.9	 16
378	  2	153.3	19.4	 20
379	  2	158.0	21.6	 16
380	  2	119.5	17.0	 16
381	  2	119.3	23.7	 16
382	  2	267.5	38.9	 16
383	  2	265.8	28.2	 16
384	  2	130.5	20.3	 16
385	  2	90.5	11.1	 16
386	  2	64.8	10.4	 16
387	  2	83.8	16.1	 16
388	  2	66.8	10.0	 16
389	  2	84.3	15.8	 16
390	  2	110.5	17.8	 16
391	  2	127.8	22.2	 16
392	  2	95.3	11.6	 16
393	  2	73.0	10.3	 16
394	  2	79.0	8.7	 16
395	  2	170.3	21.2	 16
396	  2	314.0	35.8	 16
397	  2	90.3	12.2	 16
398	  2	199.0	19.5	 16
399	  2	141.0	23.0	 16
400	  2	170.3	21.1	 16
401	  2	87.3	11.7	 16
402	  2	172.3	18.6	 16
403	  2	189.8	26.4	 16
404	  2	673.3	66.1	 16
405	  2	715.0	109.0	 16
406	  2	229.0	30.7	 16
407	  2	158.3	18.2	 16
408	  2	190.5	26.3	 16
409	  2	107.5	29.0	 16
410	  2	180.3	22.3	 16
411	  2	150.3	23.2	 16
412	  2	401.5	32.0	 16
413	  2	266.3	23.5	 16
414	  2	311.0	41.9	 16
415	  2	112.5	21.6	 16
416	  2	109.3	19.4	 16
417	  2	120.0	23.0	 16
418	  2	201.3	30.7	 16
419	  2	99.8	14.8	 16
420	  2	199.0	25.0	 16
421	  2	158.3	20.7	 16
422	  2	267.0	32.9	 16
423	  2	429.3	40.4	 16
424	  2	80.3	15.8	 16
425	  2	114.3	13.3	 16
426	  2	81.3	13.4	 16
427	  2	76.5	10.4	 16
428	  2	89.5	18.9	 16
429	  2	80.0	13.3	 16
430	  2	75.5	12.5	 16
431	  2	153.5	20.0	 16
432	  2	115.5	19.0	 16
433	  2	164.0	18.1	 16
434	  2	173.0	19.6	 16
435	  2	83.3	11.5	 16
436	  2	63.3	11.7	 16
437	  2	72.0	10.2	 16
438	  2	70.5	11.0	 16
439	  2	129.0	11.6	 16
440	  2	90.5	17.0	 16
441	  2	150.0	25.0	 16
442	  2	145.8	20.4	 16
443	  2	91.5	12.1	 16
444	  2	102.3	14.8	 16
445	  2	98.0	10.0	 16
446	  2	105.8	21.1	 16
447	  2	69.0	6.6	 16
448	  2	91.3	17.5	 16
449	  2	70.3	9.5	 16
450	  2	90.0	15.1	 16
451	  2	169.3	20.9	 16
452	  2	292.5	27.3	 16
453	  2	330.8	47.0	 16
454	  2	199.8	20.2	 16
455	  2	92.5	17.4	 16
456	  2	588.5	40.7	 16
457	  2	951.0	66.6	 16
458	  2	153.5	20.4	 16
459	  2	86.3	19.5	 16
460	  2	312.5	31.5	 16
461	  2	202.3	18.6	 16
462	  2	69.3	10.2	 16
463	  2	89.0	28.7	 16
464	  2	218.5	40.0	 16
465	  2	571.8	52.7	 16
466	  2	149.8	19.7	 16
467	  2	315.3	33.2	 16
468	  2	198.3	21.9	 16
469	  2	89.3	14.3	 16
470	  2	259.3	25.9	 16
471	  2	65.3	5.9	 16
472	  2	65.0	11.9	 16
473	  2	1215.3	103.7	 16
474	  2	56.5	6.9	 16
475	  2	81.8	13.1	 16
476	  2	77.3	11.2	 16
477	  2	156.8	24.6	 16
478	  2	87.8	15.1	 16
479	  2	98.0	13.7	 16
480	  2	85.3	12.7	 16
481	  2	78.3	18.4	 16
482	  2	147.0	18.0	 16
483	  2	97.0	11.0	 16
484	  2	119.5	15.6	 16
485	  2	177.5	22.7	 16
486	  2	80.0	12.6	 16
487	  2	88.5	19.1	 16
488	  2	80.3	11.9	 16
489	  2	74.5	10.1	 16
490	  2	122.8	21.9	 16
491	  2	88.5	10.5	 16
492	  2	79.3	11.7	 16
493	  2	211.8	23.7	 16
494	  2	113.3	17.5	 16
495	  2	90.0	13.1	 16
496	  2	147.0	22.6	 16
497	  2	314.5	35.8	 16
498	  2	67.5	12.0	 16
499	  2	78.3	13.5	 16
500	  2	98.5	18.8	 16
501	  2	125.8	20.1	 16
502	  2	126.5	12.5	 16
503	  2	84.0	15.3	 16
504	  2	78.0	15.3	 16
505	  2	81.5	15.4	 16
506	  2	330.8	35.2	 16
507	  2	174.0	24.8	 16
508	  2	107.3	23.0	 16
509	  2	199.5	20.8	 16
510	  2	239.3	34.1	 16
511	  2	251.5	34.4	 16
512	  2	76.3	13.0	 16
513	  2	357.3	50.1	 16
514	  2	125.3	20.5	 16
515	  2	99.5	16.1	 16
516	  2	91.3	15.1	 16
517	  2	133.0	12.1	 16
518	  2	244.5	26.5	 16
519	  2	182.8	28.0	 16
520	  2	82.8	15.8	 16
521	  2	83.8	31.3	 20
522	  2	115.3	18.8	 16
523	  2	109.5	18.9	 16
524	  2	833.0	86.6	 16
525	  2	365.3	39.3	 16
526	  2	281.0	39.2	 16
527	  2	123.5	23.1	 16
528	  2	109.8	15.2	 16
529	  2	143.8	15.2	 16
530	  2	122.8	14.4	 16
531	  2	79.8	14.3	 16
532	  2	72.0	9.1	 16
533	  2	155.0	18.7	 16
534	  2	152.0	16.7	 16
535	  2	94.3	11.6	 16
536	  2	77.3	14.2	 16
537	  2	86.5	13.6	 16
538	  2	113.0	19.5	 16
539	  2	90.0	12.9	 16
540	  2	123.0	23.7	 16
541	  2	91.5	13.7	 16
542	  2	184.0	30.2	 16
543	  2	400.0	65.5	 16
544	  2	201.8	18.8	 16
545	  2	196.8	23.5	 16
546	  2	109.0	17.1	 16
547	  2	197.0	22.2	 16
548	  2	66.3	13.8	 16
549	  2	75.8	13.9	 16
550	  2	86.8	14.6	 16
551	  2	103.8	13.7	 16
552	  2	85.8	13.0	 16
553	  2	94.8	9.7	 16
554	  2	84.0	12.5	 16
555	  2	72.3	9.6	 16
556	  2	106.5	17.5	 16
557	  2	202.0	19.7	 16
558	  2	157.0	17.3	 16
559	  2	352.0	47.8	 16
560	  2	3157.8	150.0	 16
561	  2	152.0	26.3	 16
562	  2	183.8	25.6	 16
563	  2	104.0	13.7	 16
564	  2	127.5	16.3	 16
565	  2	154.3	24.8	 16
566	  2	140.0	23.3	 16
567	  2	74.0	10.5	 16
568	  2	203.8	35.9	 16
569	  2	104.8	13.4	 16
570	  2	91.5	15.3	 16
571	  2	81.5	13.8	 16
572	  2	83.0	15.2	 16
573	  2	188.5	24.7	 16
574	  2	90.5	18.2	 16
575	  2	70.3	11.0	 16
576	  2	90.0	13.7	 16
577	  2	78.5	9.2	 16
578	  2	147.3	20.8	 16
579	  2	127.5	18.2	 16
580	  2	194.5	28.8	 16
581	  2	112.8	16.0	 16
582	  2	228.8	25.4	 16
583	  2	315.8	32.8	 16
584	  2	123.8	21.1	 16
585	  2	100.3	14.8	 16
586	  2	147.5	19.0	 16
587	  2	156.8	50.9	 16
588	  2	114.8	16.1	 16
589	  2	195.5	15.4	 16
590	  2	176.0	25.7	 16
591	  2	82.3	11.4	 16
592	  2	91.8	15.3	 16
593	  2	83.5	66.8	 16
594	  2	102.5	17.3	 16
595	  2	111.8	17.4	 16
596	  2	298.0	42.4	 16
597	  2	329.8	28.6	 16
598	  2	300.5	33.7	 16
599	  2	301.3	35.1	 16
600	  2	239.3	26.7	 16
601	  2	253.0	60.8	 16
602	  2	198.3	21.8	 16
603	  2	115.5	22.3	 16
604	  2	153.5	21.9	 16
605	  2	73.5	10.7	 16
606	  2	75.3	29.4	 16
607	  2	85.8	12.7	 16
608	  2	166.0	119.9	 16
609	  2	466.5	78.0	 16
610	  2	175.0	24.5	 16
611	  2	84.5	13.9	 16
612	  2	123.3	18.3	 16
613	  2	74.3	9.7	 16
614	  2	105.5	14.6	 16
615	  2	101.5	40.5	 16
616	  2	99.5	11.9	 16
617	  2	104.8	13.2	 16
618	  2	93.3	16.6	 16
619	  2	74.8	9.6	 16
620	  2	122.3	15.3	 16
621	  2	85.5	12.5	 16
622	  2	178.8	27.0	 16
623	  2	109.3	18.1	 16
624	  2	106.3	11.9	 16
625	  2	106.5	20.7	 16
626	  2	195.3	26.4	 16
627	  2	109.5	14.7	 16
628	  2	679.3	48.1	 16
629	  2	119.5	20.3	 16
630	  2	126.0	13.7	 16
631	  2	97.8	13.6	 16
632	  2	179.5	20.1	 16
633	  2	163.5	22.6	 16
634	  2	100.3	16.6	 16
635	  2	82.3	14.9	 16
636	  2	89.0	13.4	 16
637	  2	210.0	19.9	 16
638	  2	103.5	14.7	 16
639	  2	87.3	14.7	 16
640	  2	133.0	15.1	 16
641	  2	140.3	16.8	 16
642	  2	97.3	11.5	 16
643	  2	140.5	21.5	 16
644	  2	261.3	30.0	 16
645	  2	69.5	7.5	 16
646	  2	96.8	16.7	 16
647	  2	151.0	25.9	 16
648	  2	87.5	10.8	 16
649	  2	79.0	14.3	 16
650	  2	123.3	21.4	 16
651	  2	66.8	10.8	 16
652	  2	89.3	12.7	 16
653	  2	91.3	16.3	 16
654	  2	101.0	17.3	 16
655	  2	163.0	27.4	 16
656	  2	79.3	16.9	 16
657	  2	223.0	36.1	 16
658	  2	69.8	13.3	 16
659	  2	157.5	31.7	 16
660	  2	104.3	21.7	 16
661	  2	94.3	13.4	 16
662	  2	80.5	12.1	 16
663	  2	133.0	23.9	 20
664	  2	103.3	23.0	 16
665	  2	73.3	17.1	 16
666	  2	88.3	21.0	 16
667	  2	603.0	44.3	 16
668	  2	102.3	18.2	 16
669	  2	108.0	13.3	 16
670	  2	96.8	15.6	 16
671	  2	108.3	17.7	 16
672	  2	150.3	19.0	 16
673	  2	129.5	23.5	 16
674	  2	296.0	26.9	 16
675	  2	163.5	25.0	 16
676	  2	167.0	27.4	 16
677	  2	121.8	16.9	 16
678	  2	105.3	15.4	 16
679	  2	154.8	14.3	 16
680	  2	570.0	108.4	 16
681	  2	76.5	14.5	 16
682	  2	102.5	16.6	 16
683	  2	114.0	15.4	 16
684	  2	279.3	39.6	 16
685	  2	91.0	18.8	 16
686	  2	321.3	21.9	 16
687	  2	124.3	15.3	 16
688	  2	89.0	14.6	 16
689	  2	101.0	13.7	 16
690	  2	73.3	12.9	 16
691	  2	237.3	35.8	 16
692	  2	371.0	31.3	 16
693	  2	153.3	23.8	 16
694	  2	127.5	13.8	 16
695	  2	109.3	18.3	 16
696	  2	70.3	13.3	 16
697	  2	76.3	13.8	 16
698	  2	76.8	13.5	 16
699	  2	76.8	30.2	 16
700	  2	72.0	15.0	 16
701	  2	81.5	40.4	 16
702	  2	265.5	35.9	 16
703	  2	228.5	23.9	 16
704	  2	238.0	26.5	 16
705	  2	171.3	25.8	 16
706	  2	77.3	14.2	 16
707	  2	72.5	12.7	 16
708	  2	123.3	22.5	 16
709	  2	5641.8	409.9	 16
710	  2	104.0	20.8	 16
711	  2	6328.3	444.8	 16
  0	  3	7730.0	887.8	 16
  1	  3	117.0	14.2	 16
  2	  3	7299.8	718.2	 16
  3	  3	129.0	22.9	 16
  4	  3	67.3	11.9	 16
  5	  3	156.8	22.8	 16
  6	  3	79.0	20.4	 16
  7	  3	186.0	30.6	 16
  8	  3	94.3	15.5	 16
  9	  3	259.3	22.8	 16
 10	  3	157.5	25.5	 16
 11	  3	295.0	28.3	 16
 12	  3	129.0	19.7	 16
 13	  3	202.5	21.7	 16
 14	  3	130.5	16.5	 16
 15	  3	158.3	14.4	 16
 16	  3	268.5	34.6	 16
 17	  3	362.3	37.9	 16
 18	  3	554.8	67.9	 16
 19	  3	184.3	33.3	 16
 20	  3	104.3	14.0	 16
 21	  3	85.5	12.7	 16
 22	  3	141.5	17.8	 16
 23	  3	1440.3	164.5	 16
 24	  3	85.3	15.7	 16
 25	  3	168.0	24.3	 16
 26	  3	129.8	18.7	 16
 27	  3	129.0	22.5	 16
 28	  3	161.0	54.0	 16
 29	  3	129.3	17.0	 16
 30	  3	121.3	23.7	 16
 31	  3	200.8	28.3	 16
 32	  3	98.0	10.5	 16
 33	  3	220.3	27.3	 16
 34	  3	138.8	26.5	 16
 35	  3	141.5	14.3	 16
 36	  3	208.0	16.8	 16
 37	  3	554.3	62.5	 16
 38	  3	160.5	18.1	 16
 39	  3	90.0	15.5	 16
 40	  3	155.0	20.4	 16
 41	  3	432.3	50.4	 16
 42	  3	367.5	41.0	 16
 43	  3	129.0	16.1	 16
 44	  3	170.5	26.4	 16
 45	  3	90.5	13.4	 16
 46	  3	153.3	20.7	 16
 47	  3	271.8	36.1	 16
 48	  3	79.0	13.3	 16
 49	  3	135.0	87.5	 16
 50	  3	107.3	15.5	 16
 51	  3	163.8	20.0	 16
 52	  3	207.0	29.6	 16
 53	  3	90.8	14.2	 16
 54	  3	103.8	17.5	 16
 55	  3	177.3	27.3	 16
 56	  3	267.8	30.9	 16
 57	  3	184.5	25.4	 16
 58	  3	105.5	20.0	 16
 59	  3	245.8	37.5	 16
 60	  3	102.3	17.9	 16
 61	  3	238.0	26.9	 16
 62	  3	292.0	33.8	 16
 63	  3	139.3	23.5	 16
 64	  3	3351.5	496.3	 16
 65	  3	163.5	24.8	 16
 66	  3	134.3	13.8	 16
 67	  3	221.8	27.7	 16
 68	  3	97.3	13.2	 16
 69	  3	107.5	14.1	 16
 70	  3	230.8	28.2	 16
 71	  3	169.0	21.5	 16
 72	  3	143.5	25.1	 16
 73	  3	773.8	71.7	 16
 74	  3	165.8	38.6	 16
 75	  3	101.0	15.8	 16
 76	  3	80.5	13.5	 16
 77	  3	109.8	14.2	 16
 78	  3	185.0	55.6	 16
 79	  3	150.0	21.0	 16
 80	  3	98.3	19.5	 16
 81	  3	106.8	18.5	 16
 82	  3	98.3	18.0	 16
 83	  3	579.5	67.4	 16
 84	  3	270.3	30.0	 16
 85	  3	137.8	20.9	 16
 86	  3	106.0	21.2	 16
 87	  3	170.5	25.3	 16
 88	  3	336.0	42.5	 16
 89	  3	251.3	28.0	 16
 90	  3	152.8	16.8	 16
 91	  3	504.0	64.8	 16
 92	  3	549.8	69.5	 16
 93	  3	505.3	67.5	 16
 94	  3	497.0	54.9	 16
 95	  3	475.5	37.1	 16
 96	  3	408.3	76.3	 16
 97	  3	364.5	25.6	 16
 98	  3	184.0	16.9	 16
 99	  3	84.0	10.9	 16
100	  3	115.5	20.9	 16
101	  3	227.8	31.4	 16
102	  3	97.3	18.1	 16
103	  3	426.5	74.9	 20
104	  3	146.5	21.3	 16
105	  3	103.0	11.8	 16
106	  3	99.3	14.8	 16
107	  3	243.3	38.1	 16
108	  3	107.8	15.3	 16
109	  3	207.5	39.2	 16
110	  3	122.8	15.5	 16
111	  3	198.3	23.2	 16
112	  3	215.3	42.8	 16
113	  3	395.5	61.1	 16
114	  3	184.5	28.1	 16
115	  3	154.5	52.6	 16
116	  3	127.3	28.8	 16
117	  3	175.0	24.7	 16
118	  3	174.8	35.9	 16
119	  3	284.5	29.9	 16
120	  3	151.0	18.7	 16
121	  3	287.0	112.7	 16
122	  3	104.5	17.1	 16
123	  3	71.8	12.3	 16
124	  3	68.5	11.8	 16
125	  3	100.3	15.5	 16
126	  3	139.3	12.2	 16
127	  3	82.3	10.9	 16
128	  3	79.8	16.8	 16
129	  3	82.5	17.7	 16
130	  3	397.8	58.8	 16
131	  3	252.3	38.4	 16
132	  3	348.0	55.4	 16
133	  3	156.8	20.2	 16
134	  3	308.0	46.9	 16
135	  3	318.0	37.5	 16
136	  3	1397.0	179.7	 16
137	  3	108.8	21.2	 16
138	  3	326.8	34.9	 16
139	  3	776.3	89.1	 16
140	  3	88.5	8.9	 16
141	  3	102.5	19.6	 16
142	  3	757.5	66.7	 16
143	  3	323.5	47.7	 16
144	  3	73.3	13.6	 16
145	  3	80.3	10.6	 16
146	  3	3957.5	486.5	 16
147	  3	693.3	76.2	 16
148	  3	204.8	25.8	 16
149	  3	123.8	20.5	 16
150	  3	96.0	17.1	 16
151	  3	304.5	47.5	 16
152	  3	349.5	34.0	 16
153	  3	148.5	13.7	 16
154	  3	98.0	16.0	 16
155	  3	988.8	131.3	 16
156	  3	102.3	16.8	 16
157	  3	119.8	26.1	 16
158	  3	98.0	15.3	 16
159	  3	225.3	33.2	 16
160	  3	198.8	32.1	 16
161	  3	380.0	51.0	 16
162	  3	3483.3	192.3	 16
163	  3	576.0	49.3	 16
164	  3	279.5	36.8	 16
165	  3	264.5	26.7	 16
166	  3	128.8	26.2	 16
167	  3	201.3	26.6	 16
168	  3	613.3	63.0	 16
169	  3	131.3	17.8	 16
170	  3	118.3	13.7	 16
171	  3	73.5	11.0	 16
172	  3	151.0	23.5	 16
173	  3	82.5	18.2	 16
174	  3	108.0	14.1	 16
175	  3	74.5	12.0	 16
176	  3	1664.5	210.6	 16
177	  3	85.0	15.1	 16
178	  3	70.8	14.3	 16
179	  3	175.0	23.5	 16
180	  3	222.8	24.6	 16
181	  3	80.0	15.4	 16
182	  3	111.8	31.9	 16
183	  3	132.0	13.4	 16
184	  3	117.3	21.3	 16
185	  3	95.3	15.5	 16
186	  3	74.3	8.6	 16
187	  3	84.3	13.3	 16
188	  3	81.3	10.0	 16
189	  3	104.8	15.4	 16
190	  3	155.8	17.2	 16
191	  3	213.8	22.1	 16
192	  3	337.5	44.7	 16
193	  3	190.3	26.8	 16
194	  3	282.5	116.8	 16
195	  3	288.3	51.3	 16
196	  3	138.5	17.4	 16
197	  3	138.3	18.7	 16
198	  3	135.5	62.8	 16
199	  3	163.0	23.5	 16
200	  3	138.3	19.2	 16
201	  3	316.5	31.5	 16
202	  3	1348.3	89.1	 16
203	  3	141.8	61.7	 16
204	  3	119.3	22.5	 16
205	  3	101.8	12.1	 16
206	  3	94.5	14.0	 16
207	  3	337.3	45.7	 16
208	  3	81.8	16.0	 16
209	  3	106.3	17.1	 16
210	  3	84.5	25.5	 16
211	  3	73.5	11.7	 16
212	  3	92.8	16.4	 16
213	  3	92.5	10.5	 16
214	  3	87.3	15.0	 16
215	  3	252.8	31.3	 16
216	  3	76.5	11.6	 16
217	  3	167.3	25.3	 16
218	  3	123.5	12.7	 16
219	  3	145.5	23.3	 16
220	  3	151.0	13.9	 16
221	  3	219.0	26.6	 16
222	  3	83.3	14.5	 16
223	  3	126.0	17.3	 16
224	  3	81.3	10.4	 16
225	  3	115.3	13.8	 16
226	  3	171.3	30.7	 16
227	  3	104.0	14.8	 16
228	  3	100.5	21.6	 16
229	  3	102.8	16.0	 16
230	  3	1309.3	211.1	 16
231	  3	235.0	30.6	 16
232	  3	79.5	8.9	 16
233	  3	198.3	44.8	 16
234	  3	88.0	14.0	 16
235	  3	57.0	13.7	 16
236	  3	62.5	11.7	 16
237	  3	53.3	10.0	 16
238	  3	59.0	7.1	 16
239	  3	77.3	14.7	 16
240	  3	134.8	12.8	 16
241	  3	125.0	15.8	 16
242	  3	90.3	14.7	 16
243	  3	380.0	35.0	 16
244	  3	105.8	11.0	 16
245	  3	121.8	22.4	 20
246	  3	230.5	29.1	 16
247	  3	101.3	16.9	 16
248	  3	86.5	16.1	 16
249	  3	104.0	19.0	 16
250	  3	140.3	25.3	 16
251	  3	119.5	14.1	 16
252	  3	252.3	40.9	 16
253	  3	98.8	15.7	 16
254	  3	88.0	12.8	 16
255	  3	182.3	29.7	 16
256	  3	123.8	17.7	 16
257	  3	90.0	12.9	 16
258	  3	373.0	67.4	 16
259	  3	165.3	32.1	 16
260	  3	84.3	14.5	 16
261	  3	80.8	15.2	 16
262	  3	73.0	15.7	 16
263	  3	119.3	15.6	 16
264	  3	306.5	31.0	 16
265	  3	239.8	45.9	 16
266	  3	279.5	27.9	 16
267	  3	161.0	28.7	 16
268	  3	98.3	12.8	 16
269	  3	342.8	52.8	 16
270	  3	495.5	88.7	 16
271	  3	136.5	24.3	 16
272	  3	156.8	82.9	 16
273	  3	556.3	56.3	 16
274	  3	929.5	106.4	 16
275	  3	243.0	21.6	 16
276	  3	135.0	17.4	 16
277	  3	226.0	29.5	 16
278	  3	176.8	21.6	 16
279	  3	177.5	32.9	 16
280	  3	137.5	25.2	 16
281	  3	91.0	16.3	 16
282	  3	262.0	41.0	 16
283	  3	205.8	34.5	 16
284	  3	123.3	16.3	 16
285	  3	194.3	20.8	 16
286	  3	114.0	12.9	 16
287	  3	96.3	10.5	 16
288	  3	178.8	20.2	 16
289	  3	89.3	14.3	 16
290	  3	132.8	22.8	 16
291	  3	93.3	15.8	 16
292	  3	180.8	27.5	 16
293	  3	945.0	93.5	 16
294	  3	239.3	30.5	 16
295	  3	117.5	21.0	 16
296	  3	183.3	20.3	 16
297	  3	2213.5	467.7	 16
298	  3	492.0	53.7	 16
299	  3	508.8	59.5	 16
300	  3	254.5	32.7	 16
301	  3	113.3	19.6	 16
302	  3	107.5	14.5	 16
303	  3	80.0	13.3	 16
304	  3	212.8	33.3	 16
305	  3	86.8	13.8	 16
306	  3	87.3	12.9	 16
307	  3	120.3	13.8	 16
308	  3	109.5	13.6	 16
309	  3	3129.3	439.2	 16
310	  3	3118.0	580.3	 16
311	  3	208.8	34.3	 16
312	  3	312.8	29.7	 16
313	  3	298.3	31.1	 16
314	  3	145.5	17.1	 16
315	  3	456.5	72.8	 16
316	  3	911.0	132.8	 16
317	  3	324.3	40.7	 16
318	  3	197.5	23.7	 16
319	  3	91.8	21.6	 16
320	  3	194.3	38.8	 16
321	  3	207.8	21.8	 16
322	  3	113.0	13.6	 16
323	  3	182.8	21.5	 16
324	  3	204.5	20.2	 16
325	  3	130.3	16.4	 16
326	  3	787.8	124.9	 16
327	  3	74.0	12.9	 16
328	  3	162.3	24.6	 16
329	  3	462.0	44.9	 16
330	  3	98.3	25.2	 16
331	  3	84.0	11.9	 16
332	  3	77.8	19.4	 16
333	  3	86.5	13.7	 16
334	  3	171.5	31.2	 16
335	  3	83.0	12.4	 16
336	  3	78.3	15.8	 16
337	  3	81.5	14.8	 16
338	  3	80.3	14.4	 16
339	  3	104.5	19.6	 16
340	  3	94.5	16.7	 16
341	  3	2129.5	202.9	 16
342	  3	119.3	14.2	 16
343	  3	130.0	22.4	 16
344	  3	179.0	21.4	 16
345	  3	237.0	39.6	 16
346	  3	149.3	16.9	 16
347	  3	129.0	18.7	 16
348	  3	689.3	107.8	 16
349	  3	288.5	50.2	 16
350	  3	86.0	10.2	 16
351	  3	85.8	16.3	 16
352	  3	88.5	16.2	 16
353	  3	83.3	12.0	 16
354	  3	157.8	20.9	 16
355	  3	123.3	24.4	 16
356	  3	101.8	14.3	 16
357	  3	162.5	24.1	 16
358	  3	79.8	11.0	 16
359	  3	113.8	29.7	 16
360	  3	85.3	10.9	 16
361	  3	1295.5	243.8	 16
362	  3	1451.0	117.6	 16
363	  3	1218.3	86.3	 16
364	  3	158.5	16.7	 16
365	  3	191.0	31.8	 16
366	  3	91.8	15.3	 16
367	  3	86.3	9.3	 16
368	  3	117.3	22.3	 16
369	  3	116.0	17.9	 16
370	  3	106.5	30.9	 16
371	  3	338.5	41.4	 16
372	  3	107.8	15.4	 16
373	  3	558.5	71.1	 16
374	  3	113.5	21.2	 16
375	  3	103.3	14.3	 16
376	  3	173.8	21.7	 16
377	  3	90.0	11.6	 16
378	  3	114.8	16.2	 16
379	  3	145.5	21.4	 16
380	  3	152.0	23.2	 16
381	  3	987.0	75.8	 16
382	  3	373.3	48.1	 16
383	  3	385.0	35.3	 16
384	  3	126.0	24.8	 16
385	  3	88.3	14.5	 16
386	  3	64.8	13.7	 16
387	  3	193.3	20.0	 16
388	  3	94.5	13.4	 20
389	  3	235.3	26.4	 16
390	  3	175.8	28.0	 16
391	  3	79.3	11.0	 16
392	  3	144.8	20.1	 16
393	  3	111.5	19.1	 16
394	  3	196.3	31.4	 16
395	  3	137.3	19.2	 16
396	  3	792.8	123.0	 16
397	  3	91.5	14.9	 16
398	  3	91.5	13.1	 16
399	  3	102.8	29.9	 16
400	  3	473.3	104.7	 16
401	  3	264.0	31.7	 16
402	  3	198.8	32.1	 16
403	  3	92.5	18.9	 16
404	  3	91.3	12.4	 16
405	  3	301.3	36.9	 16
406	  3	137.3	17.3	 16
407	  3	124.3	23.6	 16
408	  3	107.8	16.1	 16
409	  3	139.3	20.1	 16
410	  3	157.8	18.7	 16
411	  3	454.0	53.9	 16
412	  3	210.3	34.7	 16
413	  3	854.0	105.6	 16
414	  3	83.8	13.8	 16
415	  3	104.3	12.9	 16
416	  3	153.3	25.0	 16
417	  3	121.0	20.1	 16
418	  3	125.3	19.7	 16
419	  3	110.5	32.9	 16
420	  3	73.5	10.6	 16
421	  3	707.0	138.4	 16
422	  3	449.0	105.1	 16
423	  3	133.8	16.8	 16
424	  3	104.8	11.6	 16
425	  3	1036.5	214.1	 16
426	  3	71.3	11.6	 16
427	  3	84.0	16.5	 16
428	  3	86.8	16.9	 16
429	  3	562.3	88.6	 16
430	  3	142.3	19.9	 16
431	  3	93.5	17.6	 16
432	  3	126.5	17.1	 16
433	  3	1412.3	157.9	 16
434	  3	134.3	16.1	 16
435	  3	158.3	28.7	 16
436	  3	96.3	21.6	 16
437	  3	72.0	9.8	 16
438	  3	101.8	16.2	 16
439	  3	112.5	15.0	 16
440	  3	95.5	12.5	 16
441	  3	251.8	31.0	 16
442	  3	588.5	80.7	 16
443	  3	506.3	30.3	 16
444	  3	106.0	16.5	 16
445	  3	98.8	16.9	 16
446	  3	80.3	17.4	 16
447	  3	72.3	11.9	 16
448	  3	233.8	30.9	 16
449	  3	92.8	12.8	 16
450	  3	303.3	56.1	 16
451	  3	75.0	9.8	 16
452	  3	467.5	57.1	 16
453	  3	617.0	55.0	 16
454	  3	758.8	54.7	 16
455	  3	356.3	42.1	 16
456	  3	500.5	43.2	 16
457	  3	150.5	24.9	 16
458	  3	101.3	15.7	 16
459	  3	149.8	21.5	 16
460	  3	390.3	29.0	 16
461	  3	627.3	44.4	 16
462	  3	107.3	12.4	 16
463	  3	76.3	14.0	 16
464	  3	1138.8	109.4	 16
465	  3	2503.3	142.6	 16
466	  3	2252.5	93.7	 16
467	  3	2023.8	182.0	 16
468	  3	145.3	31.8	 16
469	  3	108.3	14.7	 16
470	  3	772.0	64.2	 16
471	  3	76.0	10.5	 16
472	  3	62.5	9.3	 16
473	  3	51.3	6.8	 16
474	  3	55.0	10.6	 16
475	  3	62.3	11.9	 16
476	  3	56.0	7.6	 16
477	  3	180.3	17.9	 16
478	  3	201.8	27.3	 16
479	  3	123.3	15.1	 16
480	  3	98.5	14.5	 16
481	  3	90.3	18.1	 16
482	  3	143.3	22.2	 16
483	  3	219.3	26.0	 16
484	  3	142.5	21.0	 16
485	  3	210.8	30.3	 16
486	  3	132.0	50.5	 16
487	  3	87.8	12.9	 16
488	  3	177.5	29.0	 16
489	  3	60.3	10.3	 16
490	  3	79.0	15.0	 16
491	  3	120.3	16.4	 16
492	  3	120.5	18.7	 16
493	  3	143.0	26.6	 16
494	  3	95.3	17.3	 16
495	  3	701.5	91.0	 16
496	  3	445.3	172.1	 16
497	  3	314.5	46.9	 16
498	  3	100.0	20.7	 16
499	  3	82.3	13.0	 16
500	  3	179.3	29.8	 16
501	  3	172.0	27.8	 16
502	  3	462.3	37.9	 16
503	  3	90.0	13.6	 16
504	  3	82.8	14.4	 16
505	  3	3609.0	323.0	 16
506	  3	218.5	22.4	 16
507	  3	221.0	28.1	 16
508	  3	123.3	27.1	 16
509	  3	163.0	17.8	 16
510	  3	238.0	25.8	 16
511	  3	126.0	18.9	 16
512	  3	412.3	70.4	 16
513	  3	81.3	11.2	 16
514	  3	73.0	9.9	 16
515	  3	69.3	17.2	 16
516	  3	334.8	39.6	 16
517	  3	199.8	28.7	 16
518	  3	121.5	17.0	 16
519	  3	187.0	23.9	 16
520	  3	84.5	19.5	 16
521	  3	109.8	16.8	 16
522	  3	399.5	47.9	 16
523	  3	287.8	33.7	 16
524	  3	306.3	37.2	 16
525	  3	79.3	11.2	 16
526	  3	85.0	11.7	 16
527	  3	102.8	15.3	 16
528	  3	80.0	13.3	 16
529	  3	112.5	16.4	 16
530	  3	94.3	15.3	 20
531	  3	95.5	14.0	 16
532	  3	120.0	15.5	 16
533	  3	85.3	14.9	 16
534	  3	261.8	40.8	 16
535	  3	253.3	27.8	 16
536	  3	156.0	33.5	 16
537	  3	122.8	23.3	 16
538	  3	93.0	15.0	 16
539	  3	360.0	58.1	 16
540	  3	83.3	15.4	 16
541	  3	125.5	20.6	 16
542	  3	198.3	19.7	 16
543	  3	216.0	20.9	 16
544	  3	308.3	42.6	 16
545	  3	324.0	38.9	 16
546	  3	150.0	14.4	 16
547	  3	186.5	16.6	 16
548	  3	532.0	42.0	 16
549	  3	117.5	19.0	 16
550	  3	87.3	17.1	 16
551	  3	128.3	17.0	 16
552	  3	540.5	99.2	 16
553	  3	85.3	13.3	 16
554	  3	2018.3	191.5	 16
555	  3	80.0	12.7	 16
556	  3	118.5	15.5	 16
557	  3	99.8	17.3	 16
558	  3	515.3	70.2	 16
559	  3	188.8	21.8	 16
560	  3	1180.0	128.4	 16
561	  3	660.8	30.5	 16
562	  3	275.8	25.9	 16
563	  3	153.0	22.7	 16
564	  3	368.3	65.3	 16
565	  3	176.3	18.6	 16
566	  3	416.3	82.0	 16
567	  3	73.3	10.8	 16
568	  3	135.5	23.2	 16
569	  3	137.5	18.1	 16
570	  3	79.0	12.9	 16
571	  3	75.5	12.2	 16
572	  3	305.0	52.9	 16
573	  3	96.5	20.4	 16
574	  3	103.5	17.2	 16
575	  3	205.5	38.5	 16
576	  3	156.5	26.0	 16
577	  3	217.8	30.2	 16
578	  3	92.5	19.1	 16
579	  3	119.0	15.0	 16
580	  3	106.5	16.0	 16
581	  3	116.3	13.5	 16
582	  3	89.3	15.3	 16
583	  3	189.0	16.6	 16
584	  3	224.3	23.5	 16
585	  3	131.5	13.9	 16
586	  3	203.3	28.3	 16
587	  3	157.3	22.6	 16
588	  3	147.5	28.8	 16
589	  3	164.8	25.4	 16
590	  3	278.8	36.4	 16
591	  3	107.0	18.7	 16
592	  3	204.8	31.2	 16
593	  3	251.5	28.4	 16
594	  3	100.5	15.3	 16
595	  3	190.0	17.9	 16
596	  3	175.3	21.2	 16
597	  3	167.3	27.0	 16
598	  3	186.8	64.8	 16
599	  3	206.8	26.0	 16
600	  3	259.0	25.4	 16
601	  3	254.5	37.6	 16
602	  3	362.5	39.9	 16
603	  3	532.5	50.8	 16
604	  3	139.8	22.2	 16
605	  3	287.3	25.3	 16
606	  3	125.0	16.6	 16
607	  3	208.0	22.3	 16
608	  3	192.5	26.5	 16
609	  3	156.8	24.2	 16
610	  3	436.3	51.2	 16
611	  3	198.0	30.3	 16
612	  3	146.3	24.8	 16
613	  3	81.3	17.0	 16
614	  3	201.5	23.3	 16
615	  3	78.3	14.2	 16
616	  3	149.0	26.8	 16
617	  3	179.0	24.3	 16
618	  3	108.3	15.6	 16
619	  3	80.0	12.3	 16
620	  3	1332.8	123.5	 16
621	  3	96.0	13.3	 16
622	  3	75.0	7.3	 16
623	  3	78.3	9.6	 16
624	  3	67.3	12.3	 16
625	  3	128.3	21.7	 16
626	  3	116.5	18.8	 16
627	  3	951.5	171.4	 16
628	  3	498.8	61.8	 16
629	  3	259.3	29.4	 16
630	  3	175.0	20.3	 16
631	  3	534.3	71.5	 16
632	  3	100.0	15.6	 16
633	  3	124.0	23.1	 16
634	  3	132.3	19.4	 16
635	  3	131.8	16.3	 16
636	  3	117.5	14.3	 16
637	  3	538.0	88.2	 16
638	  3	100.5	15.2	 16
639	  3	262.0	46.0	 16
640	  3	327.0	63.9	 16
641	  3	101.3	18.5	 16
642	  3	81.3	14.6	 16
643	  3	95.3	14.1	 16
644	  3	157.0	14.8	 16
645	  3	306.5	44.0	 16
646	  3	2279.5	388.0	 16
647	  3	87.5	11.9	 16
648	  3	137.5	20.5	 16
649	  3	89.5	14.2	 16
650	  3	71.5	24.3	 16
651	  3	85.3	9.8	 16
652	  3	76.0	15.9	 16
653	  3	79.8	12.3	 16
654	  3	64.0	14.4	 16
655	  3	109.3	21.6	 16
656	  3	105.5	15.4	 16
657	  3	82.3	16.6	 16
658	  3	63.0	9.2	 16
659	  3	77.5	10.6	 16
660	  3	130.3	28.9	 16
661	  3	267.8	45.1	 16
662	  3	273.5	39.0	 16
663	  3	344.8	44.1	 16
664	  3	89.0	8.3	 16
665	  3	158.0	19.3	 16
666	  3	538.3	112.2	 16
667	  3	101.0	16.0	 16
668	  3	135.5	21.6	 16
669	  3	108.3	15.8	 16
670	  3	86.3	13.0	 16
671	  3	341.8	39.6	 16
672	  3	152.8	29.5	 20
673	  3	627.0	63.2	 16
674	  3	177.8	21.9	 16
675	  3	204.5	37.2	 16
676	  3	186.8	23.9	 16
677	  3	131.8	17.2	 16
678	  3	73.3	11.6	 16
679	  3	87.3	11.3	 16
680	  3	96.8	13.0	 16
681	  3	86.5	21.2	 16
682	  3	138.3	26.1	 16
683	  3	87.0	12.3	 16
684	  3	90.3	10.0	 16
685	  3	152.8	25.0	 16
686	  3	211.3	26.9	 16
687	  3	102.5	18.3	 16
688	  3	84.0	10.6	 16
689	  3	132.5	26.6	 16
690	  3	1015.5	219.1	 16
691	  3	171.5	25.0	 16
692	  3	461.8	59.6	 16
693	  3	240.0	14.7	 16
694	  3	265.8	25.0	 16
695	  3	214.8	22.5	 16
696	  3	260.5	39.1	 16
697	  3	89.3	10.1	 16
698	  3	98.8	10.1	 16
699	  3	136.5	19.2	 16
700	  3	730.3	104.1	 16
701	  3	204.0	24.7	 16
702	  3	138.3	20.5	 16
703	  3	231.5	28.6	 16
704	  3	224.5	36.7	 16
705	  3	325.3	38.2	 16
706	  3	90.5	13.0	 16
707	  3	60.8	7.2	 16
708	  3	6173.8	567.5	 16
709	  3	134.5	21.4	 16
710	  3	6111.0	467.1	 16
711	  3	94.3	13.3	 16
  0	  4	78.8	13.3	 16
  1	  4	66.0	12.1	 16
  2	  4	76.3	16.2	 16
  3	  4	62.0	12.6	 16
  4	  4	64.3	10.5	 16
  5	  4	125.3	20.1	 16
  6	  4	74.5	11.1	 16
  7	  4	178.3	19.9	 16
  8	  4	77.5	10.0	 16
  9	  4	113.0	14.9	 16
 10	  4	80.3	13.1	 16
 11	  4	205.8	37.0	 16
 12	  4	117.8	14.9	 16
 13	  4	274.8	37.5	 16
 14	  4	194.3	76.9	 16
 15	  4	221.3	22.6	 16
 16	  4	199.5	26.8	 16
 17	  4	1328.3	106.3	 16
 18	  4	659.3	50.5	 16
 19	  4	395.5	53.2	 16
 20	  4	93.5	13.5	 16
 21	  4	97.8	12.5	 16
 22	  4	168.8	20.0	 16
 23	  4	257.0	34.8	 16
 24	  4	86.5	16.8	 16
 25	  4	181.0	19.9	 16
 26	  4	128.0	37.3	 16
 27	  4	131.0	14.7	 16
 28	  4	141.3	14.6	 16
 29	  4	128.8	19.3	 16
 30	  4	127.0	20.3	 16
 31	  4	207.0	24.6	 16
 32	  4	99.5	18.0	 16
 33	  4	141.0	25.6	 16
 34	  4	157.5	23.5	 16
 35	  4	270.3	43.3	 16
 36	  4	138.0	12.4	 16
 37	  4	167.8	23.0	 16
 38	  4	163.8	21.3	 16
 39	  4	102.8	17.8	 16
 40	  4	121.5	17.3	 16
 41	  4	140.0	13.9	 16
 42	  4	121.5	17.3	 16
 43	  4	154.5	26.2	 16
 44	  4	128.5	14.8	 16
 45	  4	97.0	14.2	 16
 46	  4	167.5	17.7	 16
 47	  4	173.8	22.1	 16
 48	  4	83.3	18.8	 16
 49	  4	98.5	16.4	 16
 50	  4	176.5	22.4	 16
 51	  4	163.5	24.0	 16
 52	  4	112.3	22.5	 16
 53	  4	107.3	14.9	 16
 54	  4	156.8	19.0	 16
 55	  4	195.5	20.6	 16
 56	  4	241.5	29.3	 16
 57	  4	143.5	17.3	 16
 58	  4	127.0	14.5	 16
 59	  4	152.0	21.6	 16
 60	  4	87.0	11.1	 16
 61	  4	234.3	21.8	 16
 62	  4	110.3	17.1	 16
 63	  4	286.0	39.1	 16
 64	  4	927.3	127.8	 16
 65	  4	130.0	13.9	 16
 66	  4	122.3	18.6	 16
 67	  4	182.5	16.8	 16
 68	  4	100.3	14.8	 16
 69	  4	101.3	16.1	 16
 70	  4	168.0	24.1	 16
 71	  4	113.0	18.7	 16
 72	  4	135.5	15.6	 16
 73	  4	296.0	22.6	 16
 74	  4	139.5	17.5	 16
 75	  4	123.3	22.8	 16
 76	  4	84.3	9.1	 16
 77	  4	113.8	10.8	 16
 78	  4	121.3	15.2	 16
 79	  4	100.3	12.3	 16
 80	  4	102.3	11.5	 16
 81	  4	100.0	10.9	 16
 82	  4	94.0	15.4	 16
 83	  4	337.0	47.3	 16
 84	  4	254.8	36.4	 16
 85	  4	106.3	13.8	 16
 86	  4	131.8	16.7	 16
 87	  4	358.3	50.1	 16
 88	  4	683.5	57.6	 16
 89	  4	339.0	37.0	 16
 90	  4	187.3	31.6	 16
 91	  4	297.3	34.1	 16
 92	  4	278.0	28.0	 16
 93	  4	253.0	48.1	 16
 94	  4	238.3	33.0	 16
 95	  4	228.5	33.6	 16
 96	  4	154.3	17.5	 16
 97	  4	332.0	39.7	 16
 98	  4	122.3	20.7	 16
 99	  4	90.8	12.2	 16
100	  4	175.8	26.8	 16
101	  4	304.5	32.5	 16
102	  4	92.0	12.6	 16
103	  4	152.5	20.8	 16
104	  4	210.8	26.1	 16
105	  4	123.5	13.7	 16
106	  4	96.8	14.6	 16
107	  4	175.8	15.6	 16
108	  4	96.3	16.3	 16
109	  4	197.8	23.7	 16
110	  4	86.5	10.5	 16
111	  4	103.3	14.0	 16
112	  4	196.3	26.5	 20
113	  4	149.0	15.5	 16
114	  4	183.8	36.1	 16
115	  4	113.8	17.9	 16
116	  4	115.3	20.9	 16
117	  4	143.0	23.0	 16
118	  4	115.3	20.3	 16
119	  4	211.3	32.1	 16
120	  4	202.5	11.0	 16
121	  4	150.3	32.8	 16
122	  4	97.3	12.1	 16
123	  4	82.3	15.5	 16
124	  4	79.8	11.2	 16
125	  4	91.8	17.1	 16
126	  4	104.3	17.1	 16
127	  4	88.3	15.6	 16
128	  4	78.3	11.0	 16
129	  4	103.0	21.4	 16
130	  4	109.3	22.0	 16
131	  4	659.5	53.4	 16
132	  4	334.5	40.4	 16
133	  4	132.8	38.3	 16
134	  4	250.3	58.1	 16
135	  4	153.0	24.5	 16
136	  4	417.8	71.3	 16
137	  4	89.8	13.2	 16
138	  4	171.0	48.4	 16
139	  4	360.5	47.9	 16
140	  4	113.5	15.2	 16
141	  4	91.0	14.4	 16
142	  4	398.3	33.0	 16
143	  4	233.8	34.7	 16
144	  4	73.8	13.5	 16
145	  4	86.0	15.8	 16
146	  4	1192.0	207.1	 16
147	  4	155.0	24.7	 16
148	  4	116.5	18.7	 16
149	  4	93.3	18.8	 16
150	  4	105.5	12.1	 16
151	  4	141.5	28.4	 16
152	  4	138.0	23.4	 16
153	  4	125.8	18.0	 16
154	  4	136.3	120.0	 16
155	  4	120.3	14.6	 16
156	  4	110.8	38.3	 16
157	  4	92.5	18.0	 16
158	  4	99.8	17.0	 16
159	  4	102.0	15.0	 16
160	  4	351.5	50.8	 16
161	  4	279.0	34.4	 16
162	  4	442.3	57.1	 16
163	  4	103.5	20.0	 16
164	  4	204.5	24.2	 16
165	  4	201.5	27.6	 16
166	  4	93.3	22.3	 16
167	  4	170.5	22.0	 16
168	  4	92.8	14.9	 16
169	  4	74.0	8.4	 16
170	  4	132.0	18.8	 16
171	  4	79.3	10.5	 16
172	  4	100.3	14.2	 16
173	  4	77.8	11.9	 16
174	  4	98.0	11.0	 16
175	  4	98.0	18.3	 16
176	  4	136.5	17.8	 16
177	  4	90.3	17.5	 16
178	  4	79.3	13.3	 16
179	  4	266.0	33.2	 16
180	  4	373.8	35.2	 16
181	  4	82.3	17.7	 16
182	  4	88.0	21.2	 16
183	  4	180.8	14.4	 16
184	  4	96.3	13.2	 16
185	  4	109.0	22.7	 16
186	  4	74.8	13.2	 16
187	  4	84.8	17.4	 16
188	  4	72.5	9.2	 16
189	  4	79.5	11.2	 16
190	  4	95.5	13.7	 16
191	  4	217.8	15.9	 16
192	  4	156.3	22.5	 16
193	  4	118.5	18.9	 16
194	  4	129.8	18.3	 16
195	  4	121.5	24.2	 16
196	  4	157.5	17.4	 16
197	  4	261.5	32.1	 16
198	  4	178.3	25.6	 16
199	  4	217.5	24.6	 16
200	  4	138.3	20.6	 16
201	  4	85.5	12.6	 16
202	  4	119.3	21.5	 16
203	  4	110.3	16.3	 16
204	  4	92.3	16.4	 16
205	  4	118.0	18.7	 16
206	  4	127.0	14.5	 16
207	  4	118.0	22.1	 16
208	  4	80.0	16.1	 16
209	  4	107.5	21.4	 16
210	  4	90.3	18.4	 16
211	  4	86.8	14.0	 16
212	  4	89.3	16.6	 16
213	  4	106.5	17.2	 16
214	  4	78.5	13.0	 16
215	  4	115.5	16.9	 16
216	  4	84.3	26.7	 16
217	  4	212.5	20.9	 16
218	  4	171.5	22.4	 16
219	  4	132.0	18.2	 16
220	  4	96.0	13.1	 16
221	  4	133.0	16.9	 16
222	  4	103.3	13.8	 16
223	  4	86.0	13.6	 16
224	  4	80.3	16.5	 16
225	  4	83.3	10.2	 16
226	  4	123.3	15.0	 16
227	  4	120.3	20.3	 16
228	  4	128.0	16.7	 16
229	  4	101.3	12.1	 16
230	  4	120.8	19.3	 16
231	  4	94.0	15.2	 16
232	  4	78.5	14.8	 16
233	  4	76.0	9.8	 16
234	  4	76.5	11.1	 16
235	  4	71.0	14.1	 16
236	  4	60.3	11.7	 16
237	  4	66.0	11.6	 16
238	  4	63.0	14.3	 16
239	  4	70.8	12.4	 16
240	  4	150.3	15.6	 16
241	  4	123.8	18.9	 16
242	  4	106.5	14.4	 16
243	  4	435.5	50.6	 16
244	  4	134.8	21.8	 16
245	  4	100.3	16.3	 16
246	  4	286.3	30.5	 16
247	  4	238.8	30.8	 16
248	  4	79.3	18.4	 16
249	  4	95.0	11.6	 16
250	  4	82.8	14.0	 16
251	  4	88.5	17.0	 16
252	  4	105.8	14.1	 16
253	  4	70.0	10.1	 16
254	  4	96.5	15.4	 20
255	  4	104.5	16.0	 16
256	  4	90.0	16.7	 16
257	  4	89.5	11.9	 16
258	  4	130.0	22.5	 16
259	  4	88.3	15.8	 16
260	  4	82.0	12.8	 16
261	  4	81.3	14.7	 16
262	  4	79.3	12.7	 16
263	  4	114.5	25.1	 16
264	  4	187.0	33.6	 16
265	  4	87.5	9.9	 16
266	  4	189.0	39.5	 16
267	  4	117.5	18.1	 16
268	  4	79.5	11.4	 16
269	  4	107.8	16.5	 16
270	  4	154.5	29.7	 16
271	  4	101.3	16.3	 16
272	  4	278.5	38.1	 16
273	  4	1053.8	188.7	 16
274	  4	457.3	65.4	 16
275	  4	244.8	38.4	 16
276	  4	153.5	22.7	 16
277	  4	208.0	23.8	 16
278	  4	161.8	27.5	 16
279	  4	121.8	15.7	 16
280	  4	125.5	22.2	 16
281	  4	89.8	12.5	 16
282	  4	97.3	11.2	 16
283	  4	193.3	20.0	 16
284	  4	117.3	14.0	 16
285	  4	208.5	35.5	 16
286	  4	138.5	17.4	 16
287	  4	150.5	19.7	 16
288	  4	102.0	17.3	 16
289	  4	108.3	15.2	 16
290	  4	114.0	16.0	 16
291	  4	80.0	10.0	 16
292	  4	133.0	22.7	 16
293	  4	214.0	25.8	 16
294	  4	142.3	15.3	 16
295	  4	104.5	18.2	 16
296	  4	84.0	13.4	 16
297	  4	220.5	47.5	 16
298	  4	152.8	25.0	 16
299	  4	131.3	18.9	 16
300	  4	116.3	17.0	 16
301	  4	112.8	19.7	 16
302	  4	100.3	13.8	 16
303	  4	110.5	23.7	 16
304	  4	219.5	25.9	 16
305	  4	84.3	40.4	 16
306	  4	82.8	20.2	 16
307	  4	117.3	20.5	 16
308	  4	89.8	16.9	 16
309	  4	540.5	56.6	 16
310	  4	556.3	60.8	 16
311	  4	179.3	23.6	 16
312	  4	252.3	34.1	 16
313	  4	359.8	38.5	 16
314	  4	179.5	23.1	 16
315	  4	120.3	20.4	 16
316	  4	198.0	24.4	 16
317	  4	93.0	14.2	 16
318	  4	81.3	11.9	 16
319	  4	89.0	14.2	 16
320	  4	148.5	22.0	 16
321	  4	185.5	21.9	 16
322	  4	100.3	19.7	 16
323	  4	118.5	20.8	 16
324	  4	115.0	24.9	 16
325	  4	166.8	16.4	 16
326	  4	121.0	19.1	 16
327	  4	89.0	13.3	 16
328	  4	208.0	20.8	 16
329	  4	369.5	30.2	 16
330	  4	90.0	14.4	 16
331	  4	92.0	27.3	 16
332	  4	79.5	13.8	 16
333	  4	74.3	10.5	 16
334	  4	65.3	6.9	 16
335	  4	80.5	11.8	 16
336	  4	82.3	16.8	 16
337	  4	86.3	9.1	 16
338	  4	85.8	19.7	 16
339	  4	111.5	75.8	 16
340	  4	97.8	17.5	 16
341	  4	439.3	66.3	 16
342	  4	104.0	17.6	 16
343	  4	147.5	13.9	 16
344	  4	144.0	12.2	 16
345	  4	195.3	16.5	 16
346	  4	113.5	15.3	 16
347	  4	104.0	15.6	 16
348	  4	366.3	39.5	 16
349	  4	157.8	20.9	 16
350	  4	97.5	20.0	 16
351	  4	86.3	11.7	 16
352	  4	101.3	15.0	 16
353	  4	105.5	16.1	 16
354	  4	81.0	12.5	 16
355	  4	143.3	22.9	 16
356	  4	91.5	17.5	 16
357	  4	138.0	17.6	 16
358	  4	77.0	6.9	 16
359	  4	77.0	11.2	 16
360	  4	84.0	14.5	 16
361	  4	285.8	43.4	 16
362	  4	319.0	52.8	 16
363	  4	289.5	57.0	 16
364	  4	228.8	28.8	 16
365	  4	445.0	58.5	 16
366	  4	83.0	18.5	 16
367	  4	105.3	13.2	 16
368	  4	77.5	14.2	 16
369	  4	120.3	13.8	 16
370	  4	111.8	17.3	 16
371	  4	176.5	31.1	 16
372	  4	132.5	15.3	 16
373	  4	187.0	22.1	 16
374	  4	84.0	13.8	 16
375	  4	107.8	18.1	 16
376	  4	143.3	27.1	 16
377	  4	112.5	18.0	 16
378	  4	113.0	11.9	 16
379	  4	138.8	16.5	 16
380	  4	279.0	46.6	 16
381	  4	1219.3	74.3	 16
382	  4	392.3	58.7	 16
383	  4	427.3	43.2	 16
384	  4	106.0	15.6	 16
385	  4	83.3	10.3	 16
386	  4	74.3	13.8	 16
387	  4	175.8	24.6	 16
388	  4	73.0	12.4	 16
389	  4	129.0	20.9	 16
390	  4	86.0	11.4	 16
391	  4	74.3	15.7	 16
392	  4	91.8	16.8	 16
393	  4	105.3	15.4	 16
394	  4	127.5	17.3	 16
395	  4	196.8	25.0	 16
396	  4	219.5	32.8	 16
397	  4	91.8	16.8	 20
398	  4	95.3	15.3	 16
399	  4	106.3	16.3	 16
400	  4	161.0	17.4	 16
401	  4	140.5	22.1	 16
402	  4	104.5	17.4	 16
403	  4	74.0	11.3	 16
404	  4	74.5	10.7	 16
405	  4	221.3	20.8	 16
406	  4	149.0	26.2	 16
407	  4	226.5	83.7	 16
408	  4	92.0	13.8	 16
409	  4	113.3	18.6	 16
410	  4	128.0	17.4	 16
411	  4	399.5	42.8	 16
412	  4	384.3	37.9	 16
413	  4	743.5	116.7	 16
414	  4	79.5	10.1	 16
415	  4	115.3	17.4	 16
416	  4	95.3	13.4	 16
417	  4	94.3	13.2	 16
418	  4	105.0	21.3	 16
419	  4	274.0	39.9	 16
420	  4	83.0	13.4	 16
421	  4	98.5	13.6	 16
422	  4	121.3	22.7	 16
423	  4	157.0	18.2	 16
424	  4	99.0	11.7	 16
425	  4	246.8	46.9	 16
426	  4	80.0	10.8	 16
427	  4	85.0	16.1	 16
428	  4	72.0	11.0	 16
429	  4	220.5	21.7	 16
430	  4	250.8	20.3	 16
431	  4	94.8	17.1	 16
432	  4	72.3	10.5	 16
433	  4	147.3	33.9	 16
434	  4	111.5	19.3	 16
435	  4	73.5	13.2	 16
436	  4	74.3	7.5	 16
437	  4	79.0	10.2	 16
438	  4	87.3	13.3	 16
439	  4	117.5	12.9	 16
440	  4	136.3	16.5	 16
441	  4	118.3	15.6	 16
442	  4	90.3	16.2	 16
443	  4	411.8	42.5	 16
444	  4	115.3	80.0	 16
445	  4	77.3	12.6	 16
446	  4	80.8	18.0	 16
447	  4	73.0	15.9	 16
448	  4	91.0	13.7	 16
449	  4	111.3	19.9	 16
450	  4	127.3	22.6	 16
451	  4	70.0	7.5	 16
452	  4	113.3	11.7	 16
453	  4	424.8	40.4	 16
454	  4	888.0	99.9	 16
455	  4	208.3	23.7	 16
456	  4	248.5	29.8	 16
457	  4	100.5	13.4	 16
458	  4	75.5	12.1	 16
459	  4	122.3	20.3	 16
460	  4	503.0	49.5	 16
461	  4	1190.5	72.9	 16
462	  4	85.5	16.9	 16
463	  4	76.0	11.5	 16
464	  4	438.3	39.8	 16
465	  4	459.5	56.9	 16
466	  4	383.0	62.2	 16
467	  4	306.5	51.1	 16
468	  4	134.3	14.7	 16
469	  4	79.5	14.7	 16
470	  4	605.3	56.8	 16
471	  4	70.3	8.1	 16
472	  4	54.0	6.5	 16
473	  4	57.3	10.7	 16
474	  4	68.5	13.2	 16
475	  4	62.3	11.4	 16
476	  4	60.8	12.0	 16
477	  4	115.0	15.4	 16
478	  4	97.0	16.1	 16
479	  4	127.0	17.2	 16
480	  4	71.8	10.6	 16
481	  4	76.8	13.1	 16
482	  4	123.3	23.4	 16
483	  4	115.3	15.4	 16
484	  4	83.3	16.3	 16
485	  4	171.3	20.2	 16
486	  4	82.5	14.1	 16
487	  4	82.0	22.1	 16
488	  4	170.0	15.6	 16
489	  4	69.3	8.2	 16
490	  4	66.0	9.5	 16
491	  4	83.5	26.2	 16
492	  4	94.3	11.6	 16
493	  4	152.8	20.8	 16
494	  4	81.8	10.7	 16
495	  4	376.8	45.7	 16
496	  4	117.3	16.1	 16
497	  4	469.3	47.3	 16
498	  4	106.3	12.3	 16
499	  4	95.5	15.3	 16
500	  4	118.3	16.6	 16
501	  4	209.3	26.2	 16
502	  4	193.0	56.4	 16
503	  4	72.3	11.4	 16
504	  4	69.5	11.5	 16
505	  4	980.8	149.8	 16
506	  4	114.3	15.0	 16
507	  4	126.3	17.3	 16
508	  4	107.0	20.5	 16
509	  4	148.8	21.5	 16
510	  4	323.5	47.8	 16
511	  4	185.3	20.2	 16
512	  4	216.5	30.7	 16
513	  4	75.5	15.7	 16
514	  4	87.3	11.1	 16
515	  4	90.0	27.4	 16
516	  4	125.5	20.1	 16
517	  4	101.3	14.3	 16
518	  4	108.8	12.6	 16
519	  4	95.5	15.1	 16
520	  4	70.5	9.2	 16
521	  4	91.3	15.6	 16
522	  4	223.0	37.7	 16
523	  4	187.8	26.2	 16
524	  4	119.8	19.8	 16
525	  4	84.8	12.5	 16
526	  4	96.0	15.2	 16
527	  4	72.3	12.0	 16
528	  4	90.5	16.2	 16
529	  4	98.5	14.9	 16
530	  4	85.3	13.1	 16
531	  4	87.5	25.2	 16
532	  4	94.3	13.7	 16
533	  4	74.5	13.8	 16
534	  4	97.8	11.9	 16
535	  4	225.3	25.9	 16
536	  4	122.3	19.1	 16
537	  4	116.0	12.5	 16
538	  4	93.3	14.9	 16
539	  4	107.3	16.4	 20
540	  4	73.5	9.9	 16
541	  4	92.8	16.1	 16
542	  4	116.5	23.4	 16
543	  4	391.3	58.2	 16
544	  4	214.8	20.0	 16
545	  4	122.3	14.4	 16
546	  4	97.3	21.5	 16
547	  4	139.3	15.0	 16
548	  4	305.0	20.5	 16
549	  4	97.3	8.7	 16
550	  4	72.3	11.2	 16
551	  4	81.3	14.4	 16
552	  4	110.5	23.8	 16
553	  4	72.3	11.4	 16
554	  4	227.0	42.8	 16
555	  4	70.0	11.7	 16
556	  4	102.3	21.4	 16
557	  4	79.0	13.2	 16
558	  4	91.5	13.5	 16
559	  4	284.5	24.3	 16
560	  4	392.8	31.7	 16
561	  4	800.5	47.3	 16
562	  4	366.3	22.7	 16
563	  4	97.8	11.6	 16
564	  4	207.3	30.4	 16
565	  4	196.0	26.5	 16
566	  4	200.8	20.9	 16
567	  4	75.0	12.1	 16
568	  4	126.5	15.8	 16
569	  4	82.3	8.7	 16
570	  4	86.3	15.3	 16
571	  4	70.8	12.6	 16
572	  4	105.0	18.0	 16
573	  4	73.0	8.9	 16
574	  4	92.8	18.0	 16
575	  4	194.0	33.4	 16
576	  4	123.3	20.1	 16
577	  4	129.5	17.7	 16
578	  4	91.3	16.3	 16
579	  4	129.0	17.3	 16
580	  4	123.0	13.0	 16
581	  4	129.8	24.8	 16
582	  4	141.3	20.3	 16
583	  4	153.5	25.5	 16
584	  4	216.0	28.3	 16
585	  4	201.0	18.6	 16
586	  4	99.0	12.7	 16
587	  4	111.8	17.8	 16
588	  4	164.0	16.4	 16
589	  4	146.5	28.3	 16
590	  4	127.8	16.8	 16
591	  4	133.8	25.3	 16
592	  4	159.0	25.6	 16
593	  4	100.0	17.2	 16
594	  4	104.0	11.0	 16
595	  4	107.8	17.5	 16
596	  4	103.3	16.4	 16
597	  4	166.0	128.2	 16
598	  4	88.5	10.5	 16
599	  4	135.5	27.7	 16
600	  4	198.5	29.9	 16
601	  4	193.3	33.6	 16
602	  4	293.8	28.3	 16
603	  4	469.0	34.9	 16
604	  4	98.0	19.0	 16
605	  4	126.8	14.7	 16
606	  4	86.8	12.6	 16
607	  4	87.0	14.5	 16
608	  4	159.5	21.5	 16
609	  4	129.0	12.5	 16
610	  4	185.0	38.9	 16
611	  4	128.0	20.0	 16
612	  4	89.3	23.2	 16
613	  4	76.5	11.0	 16
614	  4	97.3	14.7	 16
615	  4	76.3	15.0	 16
616	  4	94.0	14.4	 16
617	  4	119.0	16.3	 16
618	  4	70.3	11.0	 16
619	  4	74.8	10.5	 16
620	  4	226.5	34.6	 16
621	  4	85.5	13.7	 16
622	  4	72.3	11.3	 16
623	  4	89.0	16.1	 16
624	  4	69.3	11.1	 16
625	  4	176.3	17.9	 16
626	  4	102.5	16.0	 16
627	  4	176.8	29.2	 16
628	  4	265.3	43.4	 16
629	  4	281.3	31.0	 16
630	  4	87.0	12.3	 16
631	  4	109.8	12.2	 16
632	  4	95.8	15.3	 16
633	  4	111.3	13.3	 16
634	  4	91.3	16.1	 16
635	  4	106.5	16.4	 16
636	  4	114.8	17.6	 16
637	  4	150.5	16.1	 16
638	  4	84.3	8.5	 16
639	  4	112.0	17.7	 16
640	  4	89.0	11.6	 16
641	  4	89.0	13.1	 16
642	  4	81.0	14.8	 16
643	  4	92.0	12.9	 16
644	  4	161.5	19.3	 16
645	  4	160.8	37.6	 16
646	  4	196.8	28.8	 16
647	  4	83.8	11.0	 16
648	  4	124.3	23.7	 16
649	  4	93.3	12.4	 16
650	  4	66.3	9.8	 16
651	  4	88.0	14.4	 16
652	  4	83.3	15.7	 16
653	  4	77.3	11.2	 16
654	  4	66.0	10.0	 16
655	  4	84.5	18.9	 16
656	  4	87.5	17.5	 16
657	  4	71.5	11.3	 16
658	  4	65.3	10.5	 16
659	  4	89.8	12.8	 16
660	  4	74.8	13.7	 16
661	  4	138.5	23.3	 16
662	  4	138.0	21.1	 16
663	  4	240.8	34.6	 16
664	  4	85.3	13.8	 16
665	  4	93.0	24.2	 16
666	  4	280.3	25.8	 16
667	  4	76.5	9.7	 16
668	  4	91.0	13.2	 16
669	  4	82.5	11.9	 16
670	  4	110.8	15.0	 16
671	  4	121.8	17.2	 16
672	  4	129.0	17.5	 16
673	  4	319.5	27.7	 16
674	  4	279.3	42.8	 16
675	  4	270.5	47.7	 16
676	  4	94.8	15.7	 16
677	  4	108.3	13.1	 16
678	  4	65.5	7.9	 16
679	  4	78.3	10.5	 16
680	  4	179.0	33.3	 16
681	  4	82.5	63.7	 16
682	  4	72.5	45.6	 20
683	  4	83.3	10.9	 16
684	  4	79.3	43.1	 16
685	  4	112.0	17.1	 16
686	  4	142.3	20.4	 16
687	  4	84.3	14.2	 16
688	  4	76.3	15.1	 16
689	  4	78.3	14.2	 16
690	  4	572.3	81.5	 16
691	  4	134.0	28.2	 16
692	  4	462.3	35.4	 16
693	  4	187.0	16.6	 16
694	  4	206.3	21.1	 16
695	  4	183.8	22.5	 16
696	  4	138.5	21.1	 16
697	  4	69.0	13.9	 16
698	  4	72.8	10.2	 16
699	  4	88.5	18.8	 16
700	  4	115.5	23.0	 16
701	  4	109.5	17.9	 16
702	  4	128.5	17.6	 16
703	  4	249.8	39.9	 16
704	  4	257.8	24.7	 16
705	  4	290.3	45.4	 16
706	  4	88.5	14.1	 16
707	  4	62.0	11.0	 16
708	  4	73.8	14.2	 16
709	  4	63.5	10.1	 16
710	  4	69.8	9.4	 16
711	  4	63.3	8.0	 16
  0	  5	104.3	16.1	 16
  1	  5	94.3	14.0	 16
  2	  5	76.0	7.9	 16
  3	  5	120.5	21.0	 16
  4	  5	78.5	12.8	 16
  5	  5	140.5	25.3	 16
  6	  5	508.3	31.7	 16
  7	  5	149.5	17.2	 16
  8	  5	113.0	19.3	 16
  9	  5	184.3	18.4	 16
 10	  5	186.0	73.7	 16
 11	  5	93.8	10.5	 16
 12	  5	184.3	35.9	 16
 13	  5	7129.3	803.2	 16
 14	  5	7341.8	789.2	 16
 15	  5	6763.8	767.8	 16
 16	  5	126.5	12.9	 16
 17	  5	93.5	17.1	 16
 18	  5	137.3	14.8	 16
 19	  5	142.0	22.6	 16
 20	  5	127.5	17.9	 16
 21	  5	119.5	13.4	 16
 22	  5	126.8	18.8	 16
 23	  5	95.3	12.8	 16
 24	  5	117.8	16.1	 16
 25	  5	111.3	12.7	 16
 26	  5	113.0	13.6	 16
 27	  5	126.0	18.8	 16
 28	  5	116.5	15.0	 16
 29	  5	89.0	15.0	 16
 30	  5	122.5	20.2	 16
 31	  5	106.3	12.9	 16
 32	  5	120.0	17.0	 16
 33	  5	120.0	17.0	 16
 34	  5	131.5	47.0	 16
 35	  5	95.0	18.6	 16
 36	  5	140.8	25.7	 16
 37	  5	6723.8	1025.8	 16
 38	  5	7045.5	878.2	 16
 39	  5	7092.5	1048.6	 16
 40	  5	145.5	20.2	 16
 41	  5	114.0	18.7	 16
 42	  5	6062.3	934.3	 16
 43	  5	142.0	16.8	 16
 44	  5	125.3	22.1	 16
 45	  5	110.8	15.0	 16
 46	  5	114.0	12.8	 16
 47	  5	81.3	13.4	 16
 48	  5	129.5	36.9	 16
 49	  5	115.5	13.2	 16
 50	  5	107.5	14.3	 16
 51	  5	104.8	14.3	 16
 52	  5	112.3	19.0	 16
 53	  5	80.8	10.9	 16
 54	  5	124.3	13.8	 16
 55	  5	128.0	19.0	 16
 56	  5	120.5	12.4	 16
 57	  5	122.5	21.8	 16
 58	  5	121.3	13.9	 16
 59	  5	79.5	13.2	 16
 60	  5	78.8	15.3	 16
 61	  5	83.8	13.7	 16
 62	  5	5857.8	736.7	 16
 63	  5	141.0	20.8	 16
 64	  5	126.3	23.8	 16
 65	  5	129.8	16.7	 16
 66	  5	6393.5	724.4	 16
 67	  5	101.5	17.2	 16
 68	  5	132.0	22.4	 16
 69	  5	5698.0	524.5	 16
 70	  5	5792.0	1101.1	 16
 71	  5	5481.5	940.9	 16
 72	  5	130.3	16.3	 16
 73	  5	84.5	12.5	 16
 74	  5	124.5	35.4	 16
 75	  5	119.5	23.3	 16
 76	  5	106.0	12.8	 16
 77	  5	102.5	20.5	 16
 78	  5	115.5	15.0	 16
 79	  5	92.0	16.5	 16
 80	  5	6139.0	559.0	 16
 81	  5	156.3	19.2	 16
 82	  5	122.3	19.8	 16
 83	  5	154.8	309.1	 16
 84	  5	6920.5	490.7	 16
 85	  5	102.3	13.2	 16
 86	  5	118.8	12.1	 16
 87	  5	139.8	21.1	 16
 88	  5	5961.8	443.2	 16
 89	  5	127.5	14.1	 16
 90	  5	115.3	19.5	 16
 91	  5	107.3	12.9	 16
 92	  5	124.5	15.6	 16
 93	  5	5371.5	706.1	 16
 94	  5	5565.0	695.3	 16
 95	  5	197.0	45.3	 16
 96	  5	142.3	23.2	 16
 97	  5	113.8	18.9	 16
 98	  5	160.5	23.7	 16
 99	  5	6262.0	873.6	 16
100	  5	6261.0	839.7	 16
101	  5	149.0	19.8	 16
102	  5	128.8	24.2	 16
103	  5	77.3	12.8	 16
104	  5	114.8	16.5	 16
105	  5	135.3	21.8	 16
106	  5	4983.0	563.0	 16
107	  5	143.3	17.7	 16
108	  5	115.0	13.4	 16
109	  5	84.8	12.3	 16
110	  5	94.0	15.3	 16
111	  5	107.8	16.9	 16
112	  5	197.0	25.0	 16
113	  5	81.5	11.7	 16
114	  5	79.3	11.1	 16
115	  5	168.3	21.2	 16
116	  5	118.3	15.4	 16
117	  5	130.3	23.2	 16
118	  5	3594.3	312.5	 16
119	  5	209.0	27.2	 16
120	  5	102.3	15.6	 16
121	  5	114.5	19.9	 20
122	  5	90.5	22.1	 16
123	  5	102.5	28.7	 16
124	  5	77.0	12.2	 16
125	  5	85.8	12.9	 16
126	  5	291.3	37.8	 16
127	  5	106.3	14.8	 16
128	  5	442.8	81.7	 16
129	  5	242.8	53.5	 16
130	  5	135.5	24.7	 16
131	  5	323.5	54.4	 16
132	  5	96.0	18.2	 16
133	  5	261.3	24.8	 16
134	  5	230.0	29.4	 16
135	  5	150.5	22.7	 16
136	  5	73.8	11.0	 16
137	  5	83.0	11.9	 16
138	  5	83.8	16.1	 16
139	  5	391.5	56.7	 16
140	  5	84.8	16.1	 16
141	  5	363.0	448.4	 16
142	  5	86.8	11.7	 16
143	  5	437.0	64.4	 16
144	  5	114.5	19.4	 16
145	  5	98.5	17.8	 16
146	  5	152.5	18.7	 16
147	  5	673.0	91.9	 16
148	  5	106.3	18.9	 16
149	  5	97.3	18.4	 16
150	  5	170.5	17.5	 16
151	  5	110.5	16.0	 16
152	  5	278.3	27.8	 16
153	  5	123.3	21.0	 16
154	  5	260.8	36.1	 16
155	  5	94.0	13.7	 16
156	  5	128.0	18.2	 16
157	  5	229.3	15.7	 16
158	  5	169.0	24.7	 16
159	  5	227.3	31.9	 16
160	  5	175.3	17.2	 16
161	  5	158.5	21.2	 16
162	  5	158.8	31.7	 16
163	  5	200.3	20.0	 16
164	  5	248.3	41.6	 16
165	  5	482.3	36.8	 16
166	  5	252.8	23.7	 16
167	  5	114.0	17.4	 16
168	  5	102.3	17.9	 16
169	  5	291.3	66.7	 16
170	  5	117.8	17.1	 16
171	  5	142.3	19.2	 16
172	  5	243.3	23.2	 16
173	  5	95.5	13.0	 16
174	  5	372.8	64.6	 16
175	  5	132.0	20.0	 16
176	  5	84.3	10.9	 16
177	  5	68.5	12.2	 16
178	  5	82.0	11.2	 16
179	  5	112.8	22.0	 16
180	  5	467.0	68.8	 16
181	  5	668.0	116.0	 16
182	  5	188.0	31.4	 16
183	  5	103.3	11.7	 16
184	  5	77.5	15.4	 16
185	  5	257.3	29.0	 16
186	  5	152.5	36.7	 16
187	  5	84.8	14.4	 16
188	  5	131.5	15.3	 16
189	  5	99.5	10.4	 16
190	  5	91.0	16.9	 16
191	  5	92.3	16.9	 16
192	  5	179.8	24.2	 16
193	  5	140.5	20.4	 16
194	  5	163.3	19.6	 16
195	  5	174.0	22.9	 16
196	  5	181.5	26.7	 16
197	  5	226.0	21.7	 16
198	  5	200.3	30.9	 16
199	  5	104.3	18.5	 16
200	  5	222.3	35.7	 16
201	  5	117.0	22.5	 16
202	  5	102.8	16.7	 16
203	  5	96.3	11.6	 16
204	  5	89.0	17.9	 16
205	  5	67.3	12.1	 16
206	  5	796.0	82.3	 16
207	  5	67.0	7.4	 16
208	  5	91.5	16.3	 16
209	  5	213.5	26.6	 16
210	  5	193.5	35.9	 16
211	  5	88.3	16.2	 16
212	  5	112.0	21.5	 16
213	  5	234.3	20.6	 16
214	  5	391.8	30.4	 16
215	  5	118.3	17.1	 16
216	  5	154.3	18.6	 16
217	  5	536.8	53.2	 16
218	  5	89.5	15.2	 16
219	  5	69.3	9.8	 16
220	  5	107.5	30.9	 16
221	  5	361.0	46.6	 16
222	  5	109.3	42.8	 16
223	  5	101.0	14.0	 16
224	  5	142.3	18.6	 16
225	  5	77.5	11.1	 16
226	  5	142.5	23.0	 16
227	  5	162.0	26.5	 16
228	  5	134.5	21.4	 16
229	  5	408.0	28.4	 16
230	  5	91.5	12.6	 16
231	  5	155.3	19.2	 16
232	  5	80.8	13.7	 16
233	  5	154.8	18.7	 16
234	  5	75.3	10.5	 16
235	  5	335.5	40.3	 16
236	  5	82.5	12.8	 16
237	  5	76.0	18.4	 16
238	  5	169.8	17.9	 16
239	  5	302.0	44.1	 16
240	  5	92.5	13.2	 16
241	  5	90.5	13.4	 16
242	  5	94.3	9.3	 16
243	  5	221.3	31.3	 16
244	  5	130.3	18.4	 16
245	  5	377.3	31.0	 16
246	  5	293.0	48.8	 16
247	  5	110.3	19.9	 16
248	  5	195.0	22.7	 16
249	  5	104.8	12.0	 16
250	  5	99.5	13.5	 16
251	  5	2637.0	245.1	 16
252	  5	90.3	18.2	 16
253	  5	74.3	13.8	 16
254	  5	75.0	12.7	 16
255	  5	421.0	68.5	 16
256	  5	880.0	124.1	 16
257	  5	114.3	18.3	 16
258	  5	127.5	17.4	 16
259	  5	73.3	10.5	 16
260	  5	75.3	12.3	 16
261	  5	83.0	10.8	 16
262	  5	348.8	60.8	 16
263	  5	85.5	13.9	 16
264	  5	104.8	17.8	 20
265	  5	90.0	12.7	 16
266	  5	82.8	16.2	 16
267	  5	96.8	10.0	 16
268	  5	87.0	12.1	 16
269	  5	124.8	23.9	 16
270	  5	99.3	14.7	 16
271	  5	751.8	145.3	 16
272	  5	242.0	45.8	 16
273	  5	113.8	22.0	 16
274	  5	92.3	26.9	 16
275	  5	88.3	12.9	 16
276	  5	82.3	13.9	 16
277	  5	80.5	12.9	 16
278	  5	161.0	24.7	 16
279	  5	95.5	10.3	 16
280	  5	161.0	28.6	 16
281	  5	982.5	91.2	 16
282	  5	936.8	98.7	 16
283	  5	301.0	52.5	 16
284	  5	155.0	19.4	 16
285	  5	361.8	55.2	 16
286	  5	88.5	8.3	 16
287	  5	118.0	50.7	 16
288	  5	271.0	38.9	 16
289	  5	177.5	23.3	 16
290	  5	2006.3	333.2	 16
291	  5	132.3	14.4	 16
292	  5	153.3	41.5	 16
293	  5	133.5	18.7	 16
294	  5	438.3	56.8	 16
295	  5	268.3	32.1	 16
296	  5	196.5	26.4	 16
297	  5	133.8	18.8	 16
298	  5	103.8	15.2	 16
299	  5	79.8	28.4	 16
300	  5	1947.0	257.1	 16
301	  5	176.0	23.0	 16
302	  5	314.5	45.3	 16
303	  5	581.8	98.6	 16
304	  5	88.5	14.1	 16
305	  5	88.5	11.4	 16
306	  5	344.3	34.5	 16
307	  5	88.5	14.5	 16
308	  5	330.0	49.1	 16
309	  5	246.8	24.5	 16
310	  5	108.8	17.8	 16
311	  5	234.3	19.9	 16
312	  5	167.0	23.5	 16
313	  5	237.5	35.3	 16
314	  5	211.8	31.9	 16
315	  5	136.3	18.1	 16
316	  5	121.0	17.3	 16
317	  5	125.8	18.4	 16
318	  5	187.3	28.7	 16
319	  5	84.0	14.3	 16
320	  5	77.3	13.5	 16
321	  5	130.3	22.7	 16
322	  5	71.5	15.4	 16
323	  5	121.0	38.3	 16
324	  5	228.3	23.7	 16
325	  5	145.3	21.4	 16
326	  5	242.5	21.0	 16
327	  5	297.5	109.4	 16
328	  5	87.3	16.4	 16
329	  5	394.5	40.2	 16
330	  5	636.5	48.2	 16
331	  5	142.3	19.5	 16
332	  5	117.5	16.6	 16
333	  5	401.3	35.4	 16
334	  5	160.0	28.5	 16
335	  5	104.0	21.9	 16
336	  5	92.0	11.2	 16
337	  5	108.3	17.3	 16
338	  5	104.3	14.3	 16
339	  5	82.3	14.3	 16
340	  5	230.5	36.6	 16
341	  5	408.0	32.6	 16
342	  5	86.0	10.4	 16
343	  5	88.5	13.0	 16
344	  5	113.0	14.1	 16
345	  5	118.5	18.0	 16
346	  5	119.3	15.2	 16
347	  5	1670.5	243.6	 16
348	  5	82.0	7.9	 16
349	  5	159.3	27.1	 16
350	  5	156.3	22.6	 16
351	  5	425.0	42.0	 16
352	  5	437.3	41.0	 16
353	  5	157.0	19.7	 16
354	  5	124.8	38.3	 16
355	  5	2465.8	212.3	 16
356	  5	101.0	16.4	 16
357	  5	199.5	31.0	 16
358	  5	122.5	20.7	 16
359	  5	110.0	16.1	 16
360	  5	111.5	16.7	 16
361	  5	198.5	26.6	 16
362	  5	402.5	42.7	 16
363	  5	78.3	11.9	 16
364	  5	76.0	13.2	 16
365	  5	82.8	8.4	 16
366	  5	86.0	16.1	 16
367	  5	1418.3	132.4	 16
368	  5	228.3	37.6	 16
369	  5	250.3	30.3	 16
370	  5	95.0	19.5	 16
371	  5	275.0	22.4	 16
372	  5	253.3	38.2	 16
373	  5	145.8	24.8	 16
374	  5	81.0	10.5	 16
375	  5	74.3	11.0	 16
376	  5	80.0	10.4	 16
377	  5	114.8	24.0	 16
378	  5	165.0	25.1	 16
379	  5	128.3	19.5	 16
380	  5	185.8	28.6	 16
381	  5	109.8	20.4	 16
382	  5	180.5	25.3	 16
383	  5	255.3	40.1	 16
384	  5	96.5	12.7	 16
385	  5	101.3	11.7	 16
386	  5	184.3	27.0	 16
387	  5	302.5	37.1	 16
388	  5	202.0	14.0	 16
389	  5	634.0	74.3	 16
390	  5	131.5	21.6	 16
391	  5	83.5	10.2	 16
392	  5	494.5	57.2	 16
393	  5	105.3	16.3	 16
394	  5	113.5	13.4	 16
395	  5	82.0	8.2	 16
396	  5	81.0	14.0	 16
397	  5	191.3	22.4	 16
398	  5	366.3	63.1	 16
399	  5	240.5	49.2	 16
400	  5	360.5	58.4	 16
401	  5	162.3	20.7	 16
402	  5	125.0	19.4	 16
403	  5	73.0	8.5	 16
404	  5	215.3	27.5	 16
405	  5	94.0	19.3	 16
406	  5	107.5	11.9	 20
407	  5	129.5	21.9	 16
408	  5	182.3	28.0	 16
409	  5	99.8	15.4	 16
410	  5	157.5	18.6	 16
411	  5	156.0	19.0	 16
412	  5	104.3	16.7	 16
413	  5	134.3	18.0	 16
414	  5	156.3	15.5	 16
415	  5	5554.5	330.9	 16
416	  5	5152.3	589.8	 16
417	  5	404.8	39.0	 16
418	  5	166.8	26.9	 16
419	  5	256.8	30.2	 16
420	  5	77.8	14.0	 16
421	  5	105.8	14.5	 16
422	  5	74.8	8.4	 16
423	  5	163.0	31.6	 16
424	  5	119.3	22.6	 16
425	  5	129.0	20.1	 16
426	  5	93.8	19.6	 16
427	  5	89.3	16.0	 16
428	  5	93.0	10.2	 16
429	  5	114.8	15.6	 16
430	  5	109.0	11.8	 16
431	  5	142.3	19.6	 16
432	  5	169.8	30.2	 16
433	  5	200.5	45.4	 16
434	  5	159.8	27.8	 16
435	  5	74.3	10.8	 16
436	  5	65.3	12.5	 16
437	  5	76.0	9.9	 16
438	  5	90.0	13.8	 16
439	  5	183.8	20.9	 16
440	  5	129.3	19.4	 16
441	  5	143.0	17.2	 16
442	  5	197.3	25.3	 16
443	  5	182.3	30.2	 16
444	  5	169.8	24.3	 16
445	  5	149.8	15.9	 16
446	  5	181.3	24.9	 16
447	  5	77.8	16.3	 16
448	  5	274.0	38.0	 16
449	  5	1067.5	148.2	 16
450	  5	575.5	91.9	 16
451	  5	918.3	80.4	 16
452	  5	271.5	31.3	 16
453	  5	220.0	29.1	 16
454	  5	422.3	62.7	 16
455	  5	182.0	29.5	 16
456	  5	75.0	14.2	 16
457	  5	122.8	19.7	 16
458	  5	335.3	32.2	 16
459	  5	117.0	18.4	 16
460	  5	97.0	17.9	 16
461	  5	244.8	31.5	 16
462	  5	115.3	28.5	 16
463	  5	346.3	47.2	 16
464	  5	1610.0	103.4	 16
465	  5	499.0	37.6	 16
466	  5	118.0	11.4	 16
467	  5	102.8	20.3	 16
468	  5	117.8	19.7	 16
469	  5	187.3	27.1	 16
470	  5	129.3	16.9	 16
471	  5	102.0	14.7	 16
472	  5	194.0	31.2	 16
473	  5	172.3	17.7	 16
474	  5	79.0	8.9	 16
475	  5	74.3	12.5	 16
476	  5	126.5	16.5	 16
477	  5	117.5	14.4	 16
478	  5	187.0	21.9	 16
479	  5	168.3	27.3	 16
480	  5	111.3	14.7	 16
481	  5	141.5	21.7	 16
482	  5	206.5	20.1	 16
483	  5	92.3	12.4	 16
484	  5	126.8	18.8	 16
485	  5	264.8	66.9	 16
486	  5	94.5	16.3	 16
487	  5	145.8	21.5	 16
488	  5	107.0	12.2	 16
489	  5	107.5	19.8	 16
490	  5	97.5	11.7	 16
491	  5	285.0	28.8	 16
492	  5	79.0	12.7	 16
493	  5	141.3	16.2	 16
494	  5	123.0	74.5	 16
495	  5	230.0	49.3	 16
496	  5	376.5	40.7	 16
497	  5	102.8	16.0	 16
498	  5	239.5	40.2	 16
499	  5	108.5	19.3	 16
500	  5	144.0	21.9	 16
501	  5	116.5	12.8	 16
502	  5	81.3	9.3	 16
503	  5	761.3	80.5	 16
504	  5	101.8	16.1	 16
505	  5	205.8	27.7	 16
506	  5	77.3	14.6	 16
507	  5	83.0	10.4	 16
508	  5	199.0	21.9	 16
509	  5	2371.5	456.5	 16
510	  5	95.3	18.6	 16
511	  5	445.3	40.0	 16
512	  5	105.5	16.0	 16
513	  5	94.0	13.7	 16
514	  5	78.0	9.0	 16
515	  5	149.3	14.4	 16
516	  5	98.8	20.0	 16
517	  5	260.0	20.3	 16
518	  5	281.0	35.8	 16
519	  5	93.8	16.8	 16
520	  5	91.0	15.2	 16
521	  5	232.8	23.2	 16
522	  5	262.5	35.2	 16
523	  5	166.3	21.9	 16
524	  5	586.3	38.8	 16
525	  5	81.0	12.3	 16
526	  5	181.0	20.0	 16
527	  5	554.0	132.0	 16
528	  5	134.8	78.8	 16
529	  5	761.3	61.8	 16
530	  5	268.8	24.7	 16
531	  5	226.0	27.7	 16
532	  5	128.8	19.2	 16
533	  5	210.5	29.5	 16
534	  5	170.8	23.9	 16
535	  5	195.5	19.2	 16
536	  5	542.3	45.8	 16
537	  5	113.3	32.4	 16
538	  5	3916.8	631.0	 16
539	  5	622.8	114.5	 16
540	  5	85.3	18.0	 16
541	  5	169.3	16.6	 16
542	  5	201.5	23.7	 16
543	  5	101.3	15.3	 16
544	  5	162.5	17.5	 16
545	  5	255.3	38.6	 16
546	  5	276.0	37.1	 16
547	  5	307.0	23.4	 16
548	  5	138.0	19.2	 20
549	  5	138.3	14.5	 16
550	  5	88.5	15.3	 16
551	  5	223.0	35.5	 16
552	  5	66.3	8.1	 16
553	  5	141.0	18.3	 16
554	  5	88.0	11.0	 16
555	  5	141.3	15.4	 16
556	  5	101.3	12.0	 16
557	  5	173.0	22.9	 16
558	  5	73.0	10.5	 16
559	  5	104.0	15.5	 16
560	  5	219.3	26.4	 16
561	  5	273.3	30.1	 16
562	  5	6197.8	883.5	 16
563	  5	127.8	23.8	 16
564	  5	88.0	11.0	 16
565	  5	172.3	21.3	 16
566	  5	507.0	60.6	 16
567	  5	712.8	54.6	 16
568	  5	152.8	25.7	 16
569	  5	314.5	38.9	 16
570	  5	966.5	71.0	 16
571	  5	83.0	24.5	 16
572	  5	162.0	24.5	 16
573	  5	101.0	16.1	 16
574	  5	88.0	11.0	 16
575	  5	164.3	24.8	 16
576	  5	183.3	31.7	 16
577	  5	90.5	12.2	 16
578	  5	145.5	24.4	 16
579	  5	1559.3	163.6	 16
580	  5	177.3	23.0	 16
581	  5	385.5	43.6	 16
582	  5	431.5	45.8	 16
583	  5	260.3	31.5	 16
584	  5	117.5	26.0	 16
585	  5	176.3	23.1	 16
586	  5	135.3	17.8	 16
587	  5	153.8	12.7	 16
588	  5	113.3	16.2	 16
589	  5	84.5	13.4	 16
590	  5	80.8	11.3	 16
591	  5	97.8	13.2	 16
592	  5	265.0	22.1	 16
593	  5	227.0	29.7	 16
594	  5	163.3	20.2	 16
595	  5	96.5	12.2	 16
596	  5	142.5	18.7	 16
597	  5	227.8	29.1	 16
598	  5	252.0	22.2	 16
599	  5	77.3	10.4	 16
600	  5	131.8	18.8	 16
601	  5	237.0	46.6	 16
602	  5	650.0	129.1	 16
603	  5	94.5	14.7	 16
604	  5	86.8	14.9	 16
605	  5	77.3	12.5	 16
606	  5	85.5	13.4	 16
607	  5	85.3	26.2	 16
608	  5	85.8	15.1	 16
609	  5	160.3	26.7	 16
610	  5	66.0	13.6	 16
611	  5	85.5	11.8	 16
612	  5	148.5	21.8	 16
613	  5	76.5	8.7	 16
614	  5	137.3	19.0	 16
615	  5	105.0	20.4	 16
616	  5	233.0	35.3	 16
617	  5	208.3	29.6	 16
618	  5	161.3	22.2	 16
619	  5	74.3	12.2	 16
620	  5	77.0	11.4	 16
621	  5	73.5	11.5	 16
622	  5	71.3	13.8	 16
623	  5	187.5	20.1	 16
624	  5	254.0	23.0	 16
625	  5	128.5	19.7	 16
626	  5	404.0	43.5	 16
627	  5	83.3	14.1	 16
628	  5	87.3	15.1	 16
629	  5	221.8	31.4	 16
630	  5	83.3	12.5	 16
631	  5	82.5	11.4	 16
632	  5	224.0	19.9	 16
633	  5	105.0	17.9	 16
634	  5	155.0	24.8	 16
635	  5	103.5	12.6	 16
636	  5	107.8	17.2	 16
637	  5	628.0	58.9	 16
638	  5	324.0	35.4	 16
639	  5	87.3	10.7	 16
640	  5	102.3	11.8	 16
641	  5	83.5	12.2	 16
642	  5	68.0	11.3	 16
643	  5	114.3	20.2	 16
644	  5	151.3	15.9	 16
645	  5	155.3	20.6	 16
646	  5	87.5	11.5	 16
647	  5	90.0	13.2	 16
648	  5	698.8	113.2	 16
649	  5	94.3	16.1	 16
650	  5	96.3	19.5	 16
651	  5	275.5	29.3	 16
652	  5	131.8	19.5	 16
653	  5	80.3	12.0	 16
654	  5	135.5	22.3	 16
655	  5	219.8	25.1	 16
656	  5	150.0	19.0	 16
657	  5	1208.8	152.8	 16
658	  5	91.8	19.3	 16
659	  5	277.5	37.2	 16
660	  5	164.0	19.9	 16
661	  5	317.0	47.2	 16
662	  5	104.3	17.9	 16
663	  5	116.5	21.2	 16
664	  5	1501.0	253.4	 16
665	  5	167.3	37.5	 16
666	  5	243.3	33.6	 16
667	  5	108.3	14.9	 16
668	  5	341.3	51.4	 16
669	  5	345.5	43.3	 16
670	  5	98.0	15.6	 16
671	  5	111.3	18.8	 16
672	  5	128.0	15.1	 16
673	  5	110.3	16.7	 16
674	  5	166.3	31.4	 16
675	  5	114.3	19.3	 16
676	  5	86.3	13.8	 16
677	  5	75.3	9.1	 16
678	  5	119.8	14.5	 16
679	  5	2157.3	470.1	 16
680	  5	85.0	12.9	 16
681	  5	321.5	39.9	 16
682	  5	92.8	13.6	 16
683	  5	130.3	18.2	 16
684	  5	104.3	11.9	 16
685	  5	75.3	9.8	 16
686	  5	79.3	13.6	 16
687	  5	74.0	11.4	 16
688	  5	4028.0	745.4	 16
689	  5	306.3	45.0	 16
690	  5	114.0	10.0	 16
691	  5	359.8	60.1	 20
692	  5	217.3	39.9	 16
693	  5	251.3	24.2	 16
694	  5	306.0	45.2	 16
695	  5	162.0	20.9	 16
696	  5	105.8	15.7	 16
697	  5	123.3	17.6	 16
698	  5	88.0	16.5	 16
699	  5	322.0	43.0	 16
700	  5	81.0	14.3	 16
701	  5	113.3	18.9	 16
702	  5	142.5	22.1	 16
703	  5	211.5	22.4	 16
704	  5	90.3	14.1	 16
705	  5	184.5	36.1	 16
706	  5	168.8	28.9	 16
707	  5	141.8	23.9	 16
708	  5	88.5	13.0	 16
709	  5	125.5	29.1	 16
710	  5	154.5	12.5	 16
711	  5	221.3	56.6	 16
  0	  6	6146.0	797.6	 16
  1	  6	97.8	15.9	 16
  2	  6	79.3	10.2	 16
  3	  6	96.3	17.8	 16
  4	  6	82.3	12.9	 16
  5	  6	109.8	14.6	 16
  6	  6	184.0	31.2	 16
  7	  6	101.5	14.9	 16
  8	  6	111.3	18.7	 16
  9	  6	333.0	33.7	 16
 10	  6	186.8	17.8	 16
 11	  6	91.3	15.9	 16
 12	  6	7494.3	830.0	 16
 13	  6	214.3	35.1	 16
 14	  6	178.5	32.2	 16
 15	  6	153.3	19.3	 16
 16	  6	6586.5	658.3	 16
 17	  6	83.5	7.4	 16
 18	  6	131.5	20.9	 16
 19	  6	158.8	26.8	 16
 20	  6	133.3	21.0	 16
 21	  6	143.8	20.4	 16
 22	  6	129.0	21.4	 16
 23	  6	93.8	12.1	 16
 24	  6	138.0	19.6	 16
 25	  6	128.5	17.6	 16
 26	  6	122.0	8.7	 16
 27	  6	127.8	23.3	 16
 28	  6	128.8	20.5	 16
 29	  6	96.5	16.7	 16
 30	  6	125.3	18.0	 16
 31	  6	130.5	14.3	 16
 32	  6	147.5	37.9	 16
 33	  6	158.3	36.6	 16
 34	  6	132.3	13.0	 16
 35	  6	90.0	17.0	 16
 36	  6	7183.8	1060.4	 16
 37	  6	145.0	31.3	 16
 38	  6	124.3	16.1	 16
 39	  6	143.0	25.6	 16
 40	  6	7604.3	1154.3	 16
 41	  6	122.3	19.2	 16
 42	  6	6768.5	1087.8	 16
 43	  6	171.8	25.7	 16
 44	  6	133.3	18.4	 16
 45	  6	139.5	21.0	 16
 46	  6	129.5	19.5	 16
 47	  6	87.5	15.8	 16
 48	  6	126.0	12.9	 16
 49	  6	116.3	21.2	 16
 50	  6	133.0	17.9	 16
 51	  6	116.3	19.2	 16
 52	  6	119.5	18.2	 16
 53	  6	99.8	14.2	 16
 54	  6	158.0	28.9	 16
 55	  6	169.3	17.5	 16
 56	  6	137.0	25.1	 16
 57	  6	118.3	14.2	 16
 58	  6	125.3	21.1	 16
 59	  6	90.8	12.8	 16
 60	  6	88.3	10.4	 16
 61	  6	83.0	11.2	 16
 62	  6	6474.8	866.7	 16
 63	  6	138.3	29.5	 16
 64	  6	120.8	19.5	 16
 65	  6	128.3	11.3	 16
 66	  6	7846.8	608.4	 16
 67	  6	112.5	17.2	 16
 68	  6	6625.0	710.2	 16
 69	  6	131.0	21.6	 16
 70	  6	120.0	13.6	 16
 71	  6	122.5	17.6	 16
 72	  6	5872.5	967.1	 16
 73	  6	88.8	7.7	 16
 74	  6	116.0	20.6	 16
 75	  6	123.8	19.4	 16
 76	  6	105.0	11.2	 16
 77	  6	120.3	18.4	 16
 78	  6	119.3	14.8	 16
 79	  6	87.0	13.6	 16
 80	  6	6175.3	522.4	 16
 81	  6	132.5	18.7	 16
 82	  6	129.8	23.8	 16
 83	  6	129.3	19.3	 16
 84	  6	7471.5	440.5	 16
 85	  6	111.8	23.7	 16
 86	  6	121.0	17.8	 16
 87	  6	6499.0	846.5	 16
 88	  6	6762.3	577.4	 16
 89	  6	148.5	25.1	 16
 90	  6	118.8	16.9	 16
 91	  6	88.3	19.3	 16
 92	  6	5934.5	522.0	 16
 93	  6	135.3	17.5	 16
 94	  6	167.3	33.9	 16
 95	  6	6922.5	483.3	 16
 96	  6	180.5	30.1	 16
 97	  6	122.3	15.3	 16
 98	  6	6369.0	1227.1	 16
 99	  6	138.0	15.6	 16
100	  6	134.5	18.5	 16
101	  6	6472.0	523.4	 16
102	  6	140.0	23.0	 16
103	  6	85.8	11.1	 16
104	  6	136.8	80.4	 16
105	  6	6202.0	618.1	 16
106	  6	136.0	20.4	 16
107	  6	6245.3	800.3	 16
108	  6	143.3	19.5	 16
109	  6	77.5	10.5	 16
110	  6	81.3	9.8	 16
111	  6	98.8	13.2	 16
112	  6	96.3	15.9	 16
113	  6	100.0	13.1	 16
114	  6	91.3	19.5	 16
115	  6	216.5	35.3	 16
116	  6	153.5	15.9	 16
117	  6	140.5	21.7	 16
118	  6	426.5	74.8	 16
119	  6	173.3	29.2	 16
120	  6	107.0	14.6	 16
121	  6	109.5	15.9	 16
122	  6	86.5	11.1	 16
123	  6	97.0	18.0	 16
124	  6	88.5	10.2	 16
125	  6	99.0	13.3	 16
126	  6	112.0	15.5	 16
127	  6	99.3	13.0	 16
128	  6	224.0	19.9	 16
129	  6	202.5	28.2	 16
130	  6	193.8	41.2	 20
131	  6	440.8	80.1	 16
132	  6	78.8	13.5	 16
133	  6	240.5	35.8	 16
134	  6	133.0	15.9	 16
135	  6	113.3	19.4	 16
136	  6	99.0	20.8	 16
137	  6	80.5	11.3	 16
138	  6	81.5	13.3	 16
139	  6	181.8	32.9	 16
140	  6	73.3	9.8	 16
141	  6	103.0	20.1	 16
142	  6	94.3	14.6	 16
143	  6	175.5	18.4	 16
144	  6	106.0	18.2	 16
145	  6	89.3	13.0	 16
146	  6	139.8	22.8	 16
147	  6	204.8	23.0	 16
148	  6	87.5	12.6	 16
149	  6	79.5	9.3	 16
150	  6	122.3	19.1	 16
151	  6	111.5	16.9	 16
152	  6	138.3	24.1	 16
153	  6	111.5	15.6	 16
154	  6	101.8	13.5	 16
155	  6	155.5	26.1	 16
156	  6	123.3	22.1	 16
157	  6	188.3	25.9	 16
158	  6	107.0	19.7	 16
159	  6	186.5	22.2	 16
160	  6	164.0	21.1	 16
161	  6	132.8	14.4	 16
162	  6	150.8	18.0	 16
163	  6	251.3	21.0	 16
164	  6	282.3	27.4	 16
165	  6	167.8	17.2	 16
166	  6	201.5	20.7	 16
167	  6	94.8	13.1	 16
168	  6	94.3	11.1	 16
169	  6	130.0	33.6	 16
170	  6	104.0	14.9	 16
171	  6	225.3	24.8	 16
172	  6	107.3	14.5	 16
173	  6	88.3	12.2	 16
174	  6	124.8	19.9	 16
175	  6	93.3	12.3	 16
176	  6	74.3	11.5	 16
177	  6	67.5	8.5	 16
178	  6	93.8	17.1	 16
179	  6	87.0	14.0	 16
180	  6	217.8	27.3	 16
181	  6	139.0	20.3	 16
182	  6	158.5	24.7	 16
183	  6	125.0	15.5	 16
184	  6	85.3	14.8	 16
185	  6	116.8	15.9	 16
186	  6	127.3	16.2	 16
187	  6	94.5	12.0	 16
188	  6	119.8	24.1	 16
189	  6	106.0	14.8	 16
190	  6	123.0	20.3	 16
191	  6	70.0	12.6	 16
192	  6	114.0	20.3	 16
193	  6	106.5	20.6	 16
194	  6	114.3	15.4	 16
195	  6	111.8	14.3	 16
196	  6	178.5	21.0	 16
197	  6	248.3	45.7	 16
198	  6	343.0	103.5	 16
199	  6	330.3	53.9	 16
200	  6	284.3	26.7	 16
201	  6	189.5	32.0	 16
202	  6	186.5	17.7	 16
203	  6	129.8	94.8	 16
204	  6	74.0	14.8	 16
205	  6	66.5	11.4	 16
206	  6	112.0	11.1	 16
207	  6	69.0	13.5	 16
208	  6	99.5	22.5	 16
209	  6	201.3	35.7	 16
210	  6	131.0	18.8	 16
211	  6	102.8	14.3	 16
212	  6	122.5	19.7	 16
213	  6	102.5	10.9	 16
214	  6	246.5	35.7	 16
215	  6	117.3	21.1	 16
216	  6	102.3	11.3	 16
217	  6	196.3	25.9	 16
218	  6	68.3	12.6	 16
219	  6	75.3	13.6	 16
220	  6	72.5	12.9	 16
221	  6	114.5	21.6	 16
222	  6	98.0	15.8	 16
223	  6	121.3	20.3	 16
224	  6	91.5	12.3	 16
225	  6	68.8	9.0	 16
226	  6	68.5	9.6	 16
227	  6	100.3	17.2	 16
228	  6	119.5	21.8	 16
229	  6	369.5	48.9	 16
230	  6	77.5	12.7	 16
231	  6	89.0	9.7	 16
232	  6	87.8	12.5	 16
233	  6	97.3	13.6	 16
234	  6	75.0	14.1	 16
235	  6	113.0	24.8	 16
236	  6	94.5	20.9	 16
237	  6	75.3	9.3	 16
238	  6	120.5	23.6	 16
239	  6	169.5	21.0	 16
240	  6	77.3	11.5	 16
241	  6	81.3	11.5	 16
242	  6	95.0	16.0	 16
243	  6	118.8	23.8	 16
244	  6	117.8	13.2	 16
245	  6	149.3	25.1	 16
246	  6	115.0	17.5	 16
247	  6	71.8	12.6	 16
248	  6	102.5	18.3	 16
249	  6	102.3	15.8	 16
250	  6	80.0	10.7	 16
251	  6	372.3	55.4	 16
252	  6	67.0	12.7	 16
253	  6	86.8	15.2	 16
254	  6	75.3	12.2	 16
255	  6	137.5	24.5	 16
256	  6	310.0	32.8	 16
257	  6	76.3	10.9	 16
258	  6	80.3	23.1	 16
259	  6	76.3	13.3	 16
260	  6	79.0	9.7	 16
261	  6	74.0	11.6	 16
262	  6	108.8	22.2	 16
263	  6	74.3	10.7	 16
264	  6	84.3	12.4	 16
265	  6	78.8	10.2	 16
266	  6	77.3	12.3	 16
267	  6	95.3	17.0	 16
268	  6	89.5	21.2	 16
269	  6	90.0	12.2	 16
270	  6	90.5	16.3	 16
271	  6	144.5	21.4	 16
272	  6	183.8	48.5	 16
273	  6	104.3	14.5	 20
274	  6	89.8	23.1	 16
275	  6	88.5	14.5	 16
276	  6	81.3	12.8	 16
277	  6	73.5	14.6	 16
278	  6	81.5	12.0	 16
279	  6	89.0	16.8	 16
280	  6	121.3	16.7	 16
281	  6	525.0	44.4	 16
282	  6	515.0	68.5	 16
283	  6	281.0	27.4	 16
284	  6	124.5	14.8	 16
285	  6	251.5	27.9	 16
286	  6	82.0	12.1	 16
287	  6	96.0	20.6	 16
288	  6	320.8	18.2	 16
289	  6	248.8	40.1	 16
290	  6	156.0	18.6	 16
291	  6	103.5	11.3	 16
292	  6	90.3	12.3	 16
293	  6	100.0	15.1	 16
294	  6	115.3	25.6	 16
295	  6	95.3	17.2	 16
296	  6	99.5	12.2	 16
297	  6	165.5	24.1	 16
298	  6	86.0	16.3	 16
299	  6	76.3	9.2	 16
300	  6	674.5	109.7	 16
301	  6	93.0	14.1	 16
302	  6	97.8	25.4	 16
303	  6	234.8	45.3	 16
304	  6	134.3	18.7	 16
305	  6	84.0	11.7	 16
306	  6	290.5	43.0	 16
307	  6	91.8	16.1	 16
308	  6	73.3	12.1	 16
309	  6	110.5	12.5	 16
310	  6	74.0	11.3	 16
311	  6	140.0	17.9	 16
312	  6	94.8	13.5	 16
313	  6	98.8	17.8	 16
314	  6	232.3	29.2	 16
315	  6	98.3	13.1	 16
316	  6	102.5	13.6	 16
317	  6	70.5	7.3	 16
318	  6	77.3	12.2	 16
319	  6	83.3	13.8	 16
320	  6	74.0	15.7	 16
321	  6	72.0	13.2	 16
322	  6	70.5	11.3	 16
323	  6	93.0	12.4	 16
324	  6	190.3	25.8	 16
325	  6	242.5	36.6	 16
326	  6	177.0	32.0	 16
327	  6	133.3	19.1	 16
328	  6	194.8	19.9	 16
329	  6	647.5	44.5	 16
330	  6	308.0	27.1	 16
331	  6	106.0	16.0	 16
332	  6	112.5	21.8	 16
333	  6	328.8	42.7	 16
334	  6	95.0	11.5	 16
335	  6	84.3	11.9	 16
336	  6	89.8	16.7	 16
337	  6	122.5	15.7	 16
338	  6	96.5	14.0	 16
339	  6	86.3	13.9	 16
340	  6	213.5	19.9	 16
341	  6	126.3	22.5	 16
342	  6	81.3	11.4	 16
343	  6	75.8	10.7	 16
344	  6	112.5	21.1	 16
345	  6	93.8	13.5	 16
346	  6	86.0	13.2	 16
347	  6	518.5	53.5	 16
348	  6	96.8	33.7	 16
349	  6	92.3	10.6	 16
350	  6	132.0	22.6	 16
351	  6	506.5	56.3	 16
352	  6	551.3	56.1	 16
353	  6	97.8	14.9	 16
354	  6	83.0	15.1	 16
355	  6	485.5	59.9	 16
356	  6	80.0	9.4	 16
357	  6	104.3	14.9	 16
358	  6	94.5	10.8	 16
359	  6	110.0	15.5	 16
360	  6	103.5	48.9	 16
361	  6	213.0	24.3	 16
362	  6	216.0	26.0	 16
363	  6	74.8	11.6	 16
364	  6	80.8	14.6	 16
365	  6	73.5	18.5	 16
366	  6	84.0	21.1	 16
367	  6	221.0	30.5	 16
368	  6	100.5	15.5	 16
369	  6	95.8	15.8	 16
370	  6	123.5	21.0	 16
371	  6	388.5	27.6	 16
372	  6	138.5	22.6	 16
373	  6	135.5	15.6	 16
374	  6	90.3	14.0	 16
375	  6	90.3	12.5	 16
376	  6	77.8	14.5	 16
377	  6	92.5	19.4	 16
378	  6	110.8	13.5	 16
379	  6	152.5	25.2	 16
380	  6	151.0	26.9	 16
381	  6	141.3	14.8	 16
382	  6	136.5	20.6	 16
383	  6	258.3	33.4	 16
384	  6	71.0	9.5	 16
385	  6	101.3	21.7	 16
386	  6	107.3	12.8	 16
387	  6	155.5	21.4	 16
388	  6	123.0	14.3	 16
389	  6	259.0	34.9	 16
390	  6	113.5	19.7	 16
391	  6	76.3	11.1	 16
392	  6	173.3	20.6	 16
393	  6	82.3	10.3	 16
394	  6	84.3	15.3	 16
395	  6	75.0	11.0	 16
396	  6	95.0	11.2	 16
397	  6	130.3	16.7	 16
398	  6	126.8	19.1	 16
399	  6	99.0	17.6	 16
400	  6	149.8	30.9	 16
401	  6	146.8	17.9	 16
402	  6	100.5	31.9	 16
403	  6	70.0	12.2	 16
404	  6	101.0	15.0	 16
405	  6	79.3	14.4	 16
406	  6	96.3	13.2	 16
407	  6	188.8	34.7	 16
408	  6	139.3	20.5	 16
409	  6	94.0	16.8	 16
410	  6	182.3	26.2	 16
411	  6	196.5	28.0	 16
412	  6	193.0	57.9	 16
413	  6	91.0	16.6	 16
414	  6	111.8	14.5	 16
415	  6	765.3	114.9	 20
416	  6	656.5	103.9	 16
417	  6	127.8	24.9	 16
418	  6	195.8	26.0	 16
419	  6	256.3	94.1	 16
420	  6	77.8	12.2	 16
421	  6	84.3	13.0	 16
422	  6	73.8	9.3	 16
423	  6	75.0	15.3	 16
424	  6	100.8	34.8	 16
425	  6	164.3	21.7	 16
426	  6	104.0	13.7	 16
427	  6	82.3	14.2	 16
428	  6	92.5	16.2	 16
429	  6	111.0	20.8	 16
430	  6	88.8	15.7	 16
431	  6	108.5	16.0	 16
432	  6	255.3	23.5	 16
433	  6	155.8	33.8	 16
434	  6	99.0	10.5	 16
435	  6	75.0	13.7	 16
436	  6	73.5	15.9	 16
437	  6	93.5	15.1	 16
438	  6	76.0	12.2	 16
439	  6	210.0	17.2	 16
440	  6	129.5	14.6	 16
441	  6	143.3	15.4	 16
442	  6	241.5	35.6	 16
443	  6	133.0	21.2	 16
444	  6	130.8	17.6	 16
445	  6	136.5	24.6	 16
446	  6	112.8	14.8	 16
447	  6	75.3	12.3	 16
448	  6	827.0	97.7	 16
449	  6	266.8	35.9	 16
450	  6	232.3	23.6	 16
451	  6	147.3	20.0	 16
452	  6	174.8	19.4	 16
453	  6	112.3	14.7	 16
454	  6	263.8	42.8	 16
455	  6	76.5	9.8	 16
456	  6	77.3	18.1	 16
457	  6	123.5	27.9	 16
458	  6	179.5	36.2	 16
459	  6	144.8	27.1	 16
460	  6	73.5	11.2	 16
461	  6	107.0	17.6	 16
462	  6	83.5	15.2	 16
463	  6	134.5	16.2	 16
464	  6	1102.0	179.1	 16
465	  6	471.3	67.9	 16
466	  6	161.0	22.4	 16
467	  6	97.0	11.7	 16
468	  6	115.3	20.6	 16
469	  6	200.0	23.2	 16
470	  6	106.0	14.3	 16
471	  6	132.3	19.5	 16
472	  6	161.0	20.8	 16
473	  6	122.5	19.1	 16
474	  6	88.8	12.9	 16
475	  6	82.5	11.0	 16
476	  6	88.0	8.4	 16
477	  6	94.8	13.1	 16
478	  6	113.3	19.3	 16
479	  6	81.3	9.6	 16
480	  6	77.3	11.4	 16
481	  6	88.3	13.0	 16
482	  6	144.0	18.8	 16
483	  6	83.5	10.6	 16
484	  6	112.8	16.1	 16
485	  6	170.0	17.0	 16
486	  6	118.3	19.0	 16
487	  6	145.3	17.9	 16
488	  6	87.0	18.7	 16
489	  6	98.3	17.6	 16
490	  6	90.5	13.8	 16
491	  6	112.8	14.8	 16
492	  6	89.0	12.5	 16
493	  6	103.3	20.8	 16
494	  6	76.3	13.7	 16
495	  6	185.3	20.7	 16
496	  6	477.0	45.9	 16
497	  6	95.3	11.4	 16
498	  6	122.5	14.5	 16
499	  6	94.0	11.7	 16
500	  6	143.3	26.2	 16
501	  6	224.3	19.3	 16
502	  6	93.0	13.8	 16
503	  6	486.0	75.9	 16
504	  6	81.5	14.2	 16
505	  6	131.0	17.7	 16
506	  6	88.8	11.7	 16
507	  6	88.3	12.8	 16
508	  6	332.5	46.9	 16
509	  6	1073.0	72.5	 16
510	  6	126.0	21.4	 16
511	  6	141.3	19.8	 16
512	  6	95.0	13.7	 16
513	  6	82.3	10.1	 16
514	  6	84.3	12.1	 16
515	  6	86.3	16.1	 16
516	  6	75.8	9.9	 16
517	  6	126.3	19.0	 16
518	  6	101.3	14.0	 16
519	  6	82.0	12.2	 16
520	  6	93.8	31.1	 16
521	  6	177.0	21.4	 16
522	  6	100.8	14.0	 16
523	  6	276.5	32.9	 16
524	  6	534.5	47.9	 16
525	  6	91.5	33.8	 16
526	  6	963.0	110.9	 16
527	  6	100.0	11.7	 16
528	  6	93.3	12.3	 16
529	  6	140.0	21.4	 16
530	  6	118.3	12.6	 16
531	  6	177.0	21.4	 16
532	  6	136.8	14.6	 16
533	  6	147.3	21.4	 16
534	  6	111.0	10.8	 16
535	  6	214.8	22.5	 16
536	  6	458.0	53.9	 16
537	  6	122.5	16.5	 16
538	  6	1706.0	199.5	 16
539	  6	258.8	37.4	 16
540	  6	77.3	11.2	 16
541	  6	162.0	23.6	 16
542	  6	112.5	17.7	 16
543	  6	75.3	13.5	 16
544	  6	164.8	27.1	 16
545	  6	212.3	19.8	 16
546	  6	245.3	35.8	 16
547	  6	313.3	37.4	 16
548	  6	213.0	24.2	 16
549	  6	221.3	23.3	 16
550	  6	104.5	12.4	 16
551	  6	146.5	30.5	 16
552	  6	71.3	8.2	 16
553	  6	76.5	19.3	 16
554	  6	76.3	8.5	 16
555	  6	82.5	11.4	 16
556	  6	83.8	12.9	 16
557	  6	82.0	16.0	 16
558	  6	101.3	16.5	 20
559	  6	108.0	13.5	 16
560	  6	253.0	29.0	 16
561	  6	89.5	19.1	 16
562	  6	1661.3	191.8	 16
563	  6	110.0	18.6	 16
564	  6	105.0	11.1	 16
565	  6	133.3	25.1	 16
566	  6	218.3	29.6	 16
567	  6	140.3	22.0	 16
568	  6	86.0	14.5	 16
569	  6	132.8	25.3	 16
570	  6	356.5	34.4	 16
571	  6	78.8	9.6	 16
572	  6	96.8	16.4	 16
573	  6	93.5	14.1	 16
574	  6	110.8	13.8	 16
575	  6	79.0	15.5	 16
576	  6	100.3	12.8	 16
577	  6	73.3	7.1	 16
578	  6	83.0	11.7	 16
579	  6	406.3	53.2	 16
580	  6	204.5	24.4	 16
581	  6	400.3	56.8	 16
582	  6	507.3	57.6	 16
583	  6	264.8	31.6	 16
584	  6	131.5	21.4	 16
585	  6	187.5	22.2	 16
586	  6	120.5	18.1	 16
587	  6	125.3	18.1	 16
588	  6	85.0	20.2	 16
589	  6	82.0	11.7	 16
590	  6	80.5	12.9	 16
591	  6	73.5	7.7	 16
592	  6	284.5	27.8	 16
593	  6	169.3	29.2	 16
594	  6	185.3	17.0	 16
595	  6	88.5	21.1	 16
596	  6	82.0	11.5	 16
597	  6	101.0	16.0	 16
598	  6	99.8	21.0	 16
599	  6	66.3	7.2	 16
600	  6	82.5	11.4	 16
601	  6	129.8	26.3	 16
602	  6	147.3	24.7	 16
603	  6	74.5	13.1	 16
604	  6	72.5	10.3	 16
605	  6	75.8	11.4	 16
606	  6	77.0	11.8	 16
607	  6	82.0	12.5	 16
608	  6	71.3	14.5	 16
609	  6	132.8	20.2	 16
610	  6	69.0	15.1	 16
611	  6	76.0	12.1	 16
612	  6	91.5	18.4	 16
613	  6	81.3	13.3	 16
614	  6	171.8	22.4	 16
615	  6	92.3	17.8	 16
616	  6	97.5	11.8	 16
617	  6	123.8	18.4	 16
618	  6	80.3	11.6	 16
619	  6	79.5	19.5	 16
620	  6	78.8	10.8	 16
621	  6	65.3	11.1	 16
622	  6	75.3	9.5	 16
623	  6	202.0	31.3	 16
624	  6	129.8	16.8	 16
625	  6	98.0	11.8	 16
626	  6	907.3	74.9	 16
627	  6	128.8	22.8	 16
628	  6	83.8	14.8	 16
629	  6	131.3	21.4	 16
630	  6	76.5	9.6	 16
631	  6	75.3	12.7	 16
632	  6	113.8	21.4	 16
633	  6	145.3	30.9	 16
634	  6	127.0	51.9	 16
635	  6	92.0	20.8	 16
636	  6	94.3	19.5	 16
637	  6	286.0	21.4	 16
638	  6	628.0	48.7	 16
639	  6	75.3	11.2	 16
640	  6	88.5	16.8	 16
641	  6	73.3	12.1	 16
642	  6	75.0	33.4	 16
643	  6	75.0	9.4	 16
644	  6	107.8	23.1	 16
645	  6	98.3	10.6	 16
646	  6	87.0	10.5	 16
647	  6	65.0	6.8	 16
648	  6	141.5	21.8	 16
649	  6	90.5	24.7	 16
650	  6	84.0	14.5	 16
651	  6	297.8	35.2	 16
652	  6	121.3	20.4	 16
653	  6	87.5	11.1	 16
654	  6	123.3	17.1	 16
655	  6	218.0	23.1	 16
656	  6	190.5	23.7	 16
657	  6	650.3	66.2	 16
658	  6	85.5	7.1	 16
659	  6	196.3	19.0	 16
660	  6	168.3	19.5	 16
661	  6	123.5	13.3	 16
662	  6	94.3	13.5	 16
663	  6	90.3	14.7	 16
664	  6	538.8	71.7	 16
665	  6	195.8	25.4	 16
666	  6	203.0	23.4	 16
667	  6	96.5	18.2	 16
668	  6	151.0	16.6	 16
669	  6	104.3	16.5	 16
670	  6	83.5	15.0	 16
671	  6	92.0	18.0	 16
672	  6	115.3	15.8	 16
673	  6	75.0	18.5	 16
674	  6	111.0	18.2	 16
675	  6	68.3	10.8	 16
676	  6	76.3	8.5	 16
677	  6	69.5	8.6	 16
678	  6	93.5	18.4	 16
679	  6	234.0	29.0	 16
680	  6	75.3	10.1	 16
681	  6	223.0	24.8	 16
682	  6	124.5	22.0	 16
683	  6	94.0	10.5	 16
684	  6	88.0	9.6	 16
685	  6	76.3	14.9	 16
686	  6	83.5	13.6	 16
687	  6	75.0	12.1	 16
688	  6	926.8	144.4	 16
689	  6	188.3	22.5	 16
690	  6	146.3	18.8	 16
691	  6	192.0	30.8	 16
692	  6	124.3	23.1	 16
693	  6	127.3	21.7	 16
694	  6	106.8	16.6	 16
695	  6	110.3	18.8	 16
696	  6	141.0	19.6	 16
697	  6	110.3	12.7	 16
698	  6	78.3	9.5	 16
699	  6	94.0	15.1	 16
700	  6	72.0	12.3	 20
701	  6	104.5	11.9	 16
702	  6	97.8	16.1	 16
703	  6	131.3	22.9	 16
704	  6	93.0	15.1	 16
705	  6	106.3	17.3	 16
706	  6	140.3	21.5	 16
707	  6	163.5	15.2	 16
708	  6	83.3	15.5	 16
709	  6	107.3	12.2	 16
710	  6	205.5	42.1	 16
711	  6	6524.5	576.5	 16
  0	  7	105.0	14.2	 16
  1	  7	116.3	15.3	 16
  2	  7	102.5	13.1	 16
  3	  7	167.0	15.0	 16
  4	  7	106.0	15.8	 16
  5	  7	117.8	15.8	 16
  6	  7	84.0	12.2	 16
  7	  7	99.5	17.0	 16
  8	  7	209.5	20.3	 16
  9	  7	415.5	45.7	 16
 10	  7	213.3	38.4	 16
 11	  7	105.0	22.0	 16
 12	  7	6987.8	759.6	 16
 13	  7	181.5	22.6	 16
 14	  7	156.0	15.4	 16
 15	  7	151.0	18.0	 16
 16	  7	134.8	19.0	 16
 17	  7	98.3	16.8	 16
 18	  7	141.8	19.4	 16
 19	  7	6316.3	1610.3	 16
 20	  7	6683.0	1533.2	 16
 21	  7	6804.0	1583.8	 16
 22	  7	147.0	22.4	 16
 23	  7	102.8	19.8	 16
 24	  7	6865.3	1102.1	 16
 25	  7	140.5	18.6	 16
 26	  7	6526.0	802.1	 16
 27	  7	6815.5	1075.7	 16
 28	  7	135.0	37.1	 16
 29	  7	97.5	15.0	 16
 30	  7	146.3	23.2	 16
 31	  7	6471.8	609.2	 16
 32	  7	6797.8	1744.5	 16
 33	  7	6840.8	1838.5	 16
 34	  7	134.3	23.2	 16
 35	  7	100.3	12.2	 16
 36	  7	6802.5	1231.5	 16
 37	  7	129.0	17.0	 16
 38	  7	116.3	17.8	 16
 39	  7	116.5	18.2	 16
 40	  7	126.8	15.5	 16
 41	  7	117.0	26.1	 16
 42	  7	7389.8	1238.1	 16
 43	  7	207.3	29.4	 16
 44	  7	6523.5	700.6	 16
 45	  7	6540.0	1708.3	 16
 46	  7	140.5	20.1	 16
 47	  7	81.8	14.6	 16
 48	  7	130.0	15.3	 16
 49	  7	113.0	15.1	 16
 50	  7	5227.5	994.3	 16
 51	  7	110.3	11.8	 16
 52	  7	120.0	22.0	 16
 53	  7	106.5	12.0	 16
 54	  7	7090.8	501.6	 16
 55	  7	6463.8	489.8	 16
 56	  7	5992.3	914.6	 16
 57	  7	133.5	22.3	 16
 58	  7	122.8	14.8	 16
 59	  7	84.8	9.2	 16
 60	  7	85.5	13.1	 16
 61	  7	101.0	15.0	 16
 62	  7	6970.8	959.7	 16
 63	  7	148.5	18.3	 16
 64	  7	129.5	15.5	 16
 65	  7	152.5	13.0	 16
 66	  7	8400.5	736.3	 16
 67	  7	111.3	13.7	 16
 68	  7	6798.8	824.3	 16
 69	  7	133.0	18.0	 16
 70	  7	108.3	14.2	 16
 71	  7	122.3	16.2	 16
 72	  7	116.3	13.1	 16
 73	  7	82.3	12.9	 16
 74	  7	124.3	19.7	 16
 75	  7	110.3	14.1	 16
 76	  7	121.0	19.4	 16
 77	  7	111.3	17.2	 16
 78	  7	119.8	16.2	 16
 79	  7	91.5	14.8	 16
 80	  7	6233.0	546.9	 16
 81	  7	132.8	14.9	 16
 82	  7	117.8	14.6	 16
 83	  7	132.8	22.2	 16
 84	  7	7693.8	496.7	 16
 85	  7	111.0	23.2	 16
 86	  7	117.3	14.6	 16
 87	  7	130.8	17.8	 16
 88	  7	6308.0	385.6	 16
 89	  7	138.8	25.1	 16
 90	  7	118.3	15.3	 16
 91	  7	81.5	9.8	 16
 92	  7	113.3	17.7	 16
 93	  7	125.0	16.1	 16
 94	  7	144.0	18.8	 16
 95	  7	6731.0	1377.2	 16
 96	  7	161.5	24.9	 16
 97	  7	111.3	18.8	 16
 98	  7	134.0	24.3	 16
 99	  7	149.0	20.8	 16
100	  7	142.3	16.6	 16
101	  7	6594.3	665.8	 16
102	  7	160.0	25.3	 16
103	  7	91.0	14.7	 16
104	  7	129.8	22.9	 16
105	  7	6792.8	553.4	 16
106	  7	143.8	24.0	 16
107	  7	7133.5	503.8	 16
108	  7	141.5	23.8	 16
109	  7	86.5	10.5	 16
110	  7	75.3	19.6	 16
111	  7	90.3	17.5	 16
112	  7	136.3	14.0	 16
113	  7	102.3	14.7	 16
114	  7	92.5	15.3	 16
115	  7	130.3	22.2	 16
116	  7	263.3	33.1	 16
117	  7	183.3	18.5	 16
118	  7	146.3	65.2	 16
119	  7	295.0	52.6	 16
120	  7	210.8	24.4	 16
121	  7	459.3	25.2	 16
122	  7	211.8	23.0	 16
123	  7	348.8	46.8	 16
124	  7	127.8	17.5	 16
125	  7	429.3	33.5	 16
126	  7	6865.0	444.6	 16
127	  7	6995.3	314.1	 16
128	  7	6410.0	531.4	 16
129	  7	247.8	33.8	 16
130	  7	110.5	18.1	 16
131	  7	2088.5	216.4	 16
132	  7	130.3	25.7	 16
133	  7	1321.8	133.9	 16
134	  7	629.5	77.4	 16
135	  7	379.0	33.8	 16
136	  7	341.8	33.5	 16
137	  7	161.0	24.4	 16
138	  7	114.5	17.5	 16
139	  7	124.5	15.1	 16
140	  7	75.3	11.3	 20
141	  7	82.0	11.7	 16
142	  7	98.0	18.4	 16
143	  7	176.3	29.1	 16
144	  7	133.8	18.7	 16
145	  7	496.3	96.4	 16
146	  7	88.8	14.5	 16
147	  7	111.5	18.3	 16
148	  7	107.0	15.3	 16
149	  7	112.3	14.4	 16
150	  7	88.5	9.8	 16
151	  7	94.0	19.0	 16
152	  7	111.5	18.5	 16
153	  7	119.8	24.5	 16
154	  7	189.5	22.7	 16
155	  7	90.8	14.8	 16
156	  7	772.0	44.8	 16
157	  7	884.8	66.5	 16
158	  7	204.0	18.1	 16
159	  7	192.3	30.8	 16
160	  7	126.8	16.3	 16
161	  7	141.5	15.9	 16
162	  7	119.8	17.5	 16
163	  7	117.8	14.7	 16
164	  7	145.5	16.7	 16
165	  7	184.8	24.8	 16
166	  7	101.8	15.6	 16
167	  7	163.8	28.3	 16
168	  7	130.0	21.7	 16
169	  7	215.5	18.6	 16
170	  7	339.8	47.6	 16
171	  7	238.5	25.9	 16
172	  7	120.0	38.0	 16
173	  7	93.5	15.5	 16
174	  7	658.0	107.6	 16
175	  7	86.5	16.6	 16
176	  7	193.3	21.7	 16
177	  7	83.3	14.2	 16
178	  7	103.3	25.2	 16
179	  7	92.3	14.2	 16
180	  7	228.8	40.3	 16
181	  7	92.3	10.8	 16
182	  7	307.3	49.3	 16
183	  7	87.3	18.7	 16
184	  7	81.0	14.5	 16
185	  7	88.8	20.3	 16
186	  7	142.0	17.9	 16
187	  7	116.8	16.9	 16
188	  7	131.3	21.1	 16
189	  7	125.5	19.2	 16
190	  7	129.0	15.0	 16
191	  7	92.3	17.1	 16
192	  7	126.3	14.0	 16
193	  7	153.3	25.6	 16
194	  7	174.0	19.0	 16
195	  7	92.0	12.0	 16
196	  7	97.3	16.9	 16
197	  7	75.5	9.3	 16
198	  7	126.0	14.7	 16
199	  7	1012.5	87.8	 16
200	  7	241.8	26.4	 16
201	  7	110.5	13.7	 16
202	  7	103.8	10.0	 16
203	  7	133.8	18.8	 16
204	  7	127.5	20.4	 16
205	  7	75.5	13.5	 16
206	  7	139.3	18.0	 16
207	  7	107.8	17.2	 16
208	  7	163.5	157.3	 16
209	  7	71.3	11.8	 16
210	  7	107.3	22.8	 16
211	  7	106.3	21.0	 16
212	  7	122.3	16.7	 16
213	  7	137.3	15.5	 16
214	  7	154.3	22.5	 16
215	  7	140.5	20.7	 16
216	  7	115.3	15.3	 16
217	  7	198.3	20.3	 16
218	  7	120.0	18.2	 16
219	  7	80.5	14.0	 16
220	  7	138.3	20.9	 16
221	  7	145.8	29.6	 16
222	  7	1025.0	204.6	 16
223	  7	103.8	18.5	 16
224	  7	90.0	18.2	 16
225	  7	137.0	17.9	 16
226	  7	184.8	29.7	 16
227	  7	171.5	19.8	 16
228	  7	203.8	30.0	 16
229	  7	82.5	16.3	 16
230	  7	89.8	16.3	 16
231	  7	471.3	53.6	 16
232	  7	94.8	15.3	 16
233	  7	120.5	16.7	 16
234	  7	76.5	13.2	 16
235	  7	101.0	15.8	 16
236	  7	218.3	28.1	 16
237	  7	72.0	12.5	 16
238	  7	75.3	13.9	 16
239	  7	499.0	47.2	 16
240	  7	77.3	12.0	 16
241	  7	126.0	17.5	 16
242	  7	202.3	22.6	 16
243	  7	173.5	21.7	 16
244	  7	1016.5	149.4	 16
245	  7	77.3	9.3	 16
246	  7	74.8	12.8	 16
247	  7	106.0	17.0	 16
248	  7	115.3	21.4	 16
249	  7	105.5	20.0	 16
250	  7	78.8	12.9	 16
251	  7	118.3	13.9	 16
252	  7	343.0	38.0	 16
253	  7	82.3	12.7	 16
254	  7	122.5	16.7	 16
255	  7	83.5	13.6	 16
256	  7	78.3	12.5	 16
257	  7	94.3	12.6	 16
258	  7	75.3	10.9	 16
259	  7	155.5	30.2	 16
260	  7	115.5	18.7	 16
261	  7	225.3	19.5	 16
262	  7	101.8	15.5	 16
263	  7	2281.8	189.8	 16
264	  7	125.3	19.3	 16
265	  7	89.5	16.0	 16
266	  7	89.5	17.7	 16
267	  7	327.5	43.1	 16
268	  7	362.0	56.1	 16
269	  7	73.8	12.4	 16
270	  7	77.0	11.0	 16
271	  7	142.5	24.5	 16
272	  7	247.5	27.5	 16
273	  7	140.5	23.6	 16
274	  7	152.5	21.3	 16
275	  7	116.8	16.4	 16
276	  7	199.3	26.4	 16
277	  7	122.5	14.8	 16
278	  7	178.3	25.7	 16
279	  7	102.8	13.3	 16
280	  7	90.3	12.8	 16
281	  7	118.5	19.6	 16
282	  7	999.3	185.7	 20
283	  7	114.5	20.0	 16
284	  7	141.0	24.7	 16
285	  7	131.0	24.5	 16
286	  7	97.3	16.0	 16
287	  7	418.8	91.7	 16
288	  7	184.3	33.4	 16
289	  7	172.0	28.3	 16
290	  7	143.5	19.3	 16
291	  7	235.3	41.5	 16
292	  7	71.3	12.4	 16
293	  7	159.5	30.1	 16
294	  7	115.3	15.1	 16
295	  7	87.5	13.0	 16
296	  7	85.3	13.9	 16
297	  7	109.0	18.1	 16
298	  7	253.3	35.5	 16
299	  7	208.5	29.7	 16
300	  7	205.3	29.2	 16
301	  7	437.8	74.3	 16
302	  7	95.8	18.6	 16
303	  7	254.5	34.2	 16
304	  7	125.3	22.9	 16
305	  7	83.3	14.6	 16
306	  7	825.8	113.9	 16
307	  7	93.8	12.2	 16
308	  7	182.0	34.0	 16
309	  7	109.8	16.7	 16
310	  7	111.3	21.0	 16
311	  7	194.3	28.1	 16
312	  7	130.5	17.0	 16
313	  7	181.8	21.8	 16
314	  7	200.0	19.4	 16
315	  7	191.3	27.2	 16
316	  7	327.5	51.2	 16
317	  7	136.0	25.1	 16
318	  7	98.3	14.1	 16
319	  7	99.3	15.3	 16
320	  7	78.5	11.2	 16
321	  7	361.3	55.6	 16
322	  7	142.0	28.1	 16
323	  7	135.0	21.1	 16
324	  7	188.8	26.5	 16
325	  7	262.5	35.6	 16
326	  7	766.8	86.3	 16
327	  7	203.8	25.1	 16
328	  7	79.3	17.6	 16
329	  7	161.3	24.7	 16
330	  7	347.5	40.2	 16
331	  7	148.3	26.2	 16
332	  7	146.0	20.5	 16
333	  7	7274.0	609.1	 16
334	  7	6375.0	857.1	 16
335	  7	166.0	27.2	 16
336	  7	82.0	10.4	 16
337	  7	84.8	10.9	 16
338	  7	92.5	15.4	 16
339	  7	128.8	19.0	 16
340	  7	133.5	18.7	 16
341	  7	75.0	8.4	 16
342	  7	142.0	21.4	 16
343	  7	79.0	11.8	 16
344	  7	107.8	16.1	 16
345	  7	129.3	15.5	 16
346	  7	135.3	16.5	 16
347	  7	333.0	27.2	 16
348	  7	218.0	27.6	 16
349	  7	116.8	18.5	 16
350	  7	105.0	12.6	 16
351	  7	82.3	11.5	 16
352	  7	280.8	32.7	 16
353	  7	112.8	18.0	 16
354	  7	78.0	11.7	 16
355	  7	107.8	16.2	 16
356	  7	151.3	19.9	 16
357	  7	268.3	48.0	 16
358	  7	1325.0	115.6	 16
359	  7	219.8	21.7	 16
360	  7	249.5	36.7	 16
361	  7	90.5	10.7	 16
362	  7	85.3	10.1	 16
363	  7	103.5	19.3	 16
364	  7	73.3	12.0	 16
365	  7	101.5	23.6	 16
366	  7	155.0	21.8	 16
367	  7	170.8	26.9	 16
368	  7	84.0	11.8	 16
369	  7	124.0	17.7	 16
370	  7	161.0	24.2	 16
371	  7	169.5	22.9	 16
372	  7	292.0	31.6	 16
373	  7	129.8	15.6	 16
374	  7	170.0	24.3	 16
375	  7	75.8	15.3	 16
376	  7	102.0	18.7	 16
377	  7	118.0	17.2	 16
378	  7	187.5	24.0	 16
379	  7	281.8	47.3	 16
380	  7	272.0	34.4	 16
381	  7	123.5	15.7	 16
382	  7	142.3	16.5	 16
383	  7	888.5	60.5	 16
384	  7	117.5	14.4	 16
385	  7	83.8	14.0	 16
386	  7	114.3	26.5	 16
387	  7	173.5	32.5	 16
388	  7	154.3	20.7	 16
389	  7	84.3	15.0	 16
390	  7	89.8	19.9	 16
391	  7	170.0	28.6	 16
392	  7	77.5	12.1	 16
393	  7	82.0	15.8	 16
394	  7	136.5	24.1	 16
395	  7	293.3	25.3	 16
396	  7	471.3	50.0	 16
397	  7	420.8	38.7	 16
398	  7	73.0	7.3	 16
399	  7	86.5	13.5	 16
400	  7	91.8	14.1	 16
401	  7	255.5	37.9	 16
402	  7	177.8	30.3	 16
403	  7	112.0	15.6	 16
404	  7	90.3	10.3	 16
405	  7	75.0	10.3	 16
406	  7	491.5	65.9	 16
407	  7	95.5	13.4	 16
408	  7	82.0	10.8	 16
409	  7	96.5	13.2	 16
410	  7	104.8	18.4	 16
411	  7	178.3	24.2	 16
412	  7	219.3	24.4	 16
413	  7	560.0	65.9	 16
414	  7	80.5	12.7	 16
415	  7	127.5	19.5	 16
416	  7	79.5	12.9	 16
417	  7	118.8	18.3	 16
418	  7	233.8	31.4	 16
419	  7	80.5	18.1	 16
420	  7	70.0	9.9	 16
421	  7	64.3	14.7	 16
422	  7	74.0	10.0	 16
423	  7	114.8	17.4	 16
424	  7	405.8	48.2	 20
425	  7	153.0	18.0	 16
426	  7	390.8	53.0	 16
427	  7	169.5	30.6	 16
428	  7	156.5	15.1	 16
429	  7	75.8	8.6	 16
430	  7	85.8	11.3	 16
431	  7	75.5	12.8	 16
432	  7	148.3	25.2	 16
433	  7	88.8	13.7	 16
434	  7	139.5	26.9	 16
435	  7	141.0	18.4	 16
436	  7	142.3	19.5	 16
437	  7	99.0	16.3	 16
438	  7	128.3	32.3	 16
439	  7	75.5	13.8	 16
440	  7	95.3	16.5	 16
441	  7	257.5	40.7	 16
442	  7	162.5	23.0	 16
443	  7	256.0	72.1	 16
444	  7	153.5	22.1	 16
445	  7	111.3	16.4	 16
446	  7	138.0	21.9	 16
447	  7	307.0	32.5	 16
448	  7	209.5	27.1	 16
449	  7	281.8	44.5	 16
450	  7	342.0	32.3	 16
451	  7	107.5	22.6	 16
452	  7	228.3	33.8	 16
453	  7	237.3	41.4	 16
454	  7	585.0	67.1	 16
455	  7	233.5	28.0	 16
456	  7	198.5	26.6	 16
457	  7	80.3	10.5	 16
458	  7	90.5	14.1	 16
459	  7	133.5	14.6	 16
460	  7	400.8	65.9	 16
461	  7	78.3	14.5	 16
462	  7	449.8	81.5	 16
463	  7	77.3	9.2	 16
464	  7	64.5	13.2	 16
465	  7	78.8	21.3	 16
466	  7	127.5	21.8	 16
467	  7	184.0	15.0	 16
468	  7	89.5	12.1	 16
469	  7	84.0	9.1	 16
470	  7	168.8	58.2	 16
471	  7	90.3	12.6	 16
472	  7	99.5	11.7	 16
473	  7	105.5	10.6	 16
474	  7	63.3	6.9	 16
475	  7	104.3	18.8	 16
476	  7	71.8	10.5	 16
477	  7	130.8	20.1	 16
478	  7	74.5	10.6	 16
479	  7	114.0	47.9	 16
480	  7	73.3	15.5	 16
481	  7	75.8	11.0	 16
482	  7	177.5	31.3	 16
483	  7	348.5	26.2	 16
484	  7	88.8	15.4	 16
485	  7	140.0	16.3	 16
486	  7	155.8	20.5	 16
487	  7	176.3	18.7	 16
488	  7	207.3	26.6	 16
489	  7	80.3	11.1	 16
490	  7	105.3	19.4	 16
491	  7	95.8	13.0	 16
492	  7	82.3	14.9	 16
493	  7	205.3	27.3	 16
494	  7	123.5	16.9	 16
495	  7	520.8	53.8	 16
496	  7	97.5	20.3	 16
497	  7	116.3	16.0	 16
498	  7	108.3	18.1	 16
499	  7	208.5	40.1	 16
500	  7	116.8	19.9	 16
501	  7	110.5	12.2	 16
502	  7	444.5	38.0	 16
503	  7	800.0	78.2	 16
504	  7	187.3	21.7	 16
505	  7	256.3	43.2	 16
506	  7	184.0	18.8	 16
507	  7	222.0	24.0	 16
508	  7	127.8	30.2	 16
509	  7	154.8	28.1	 16
510	  7	115.0	19.2	 16
511	  7	140.3	25.7	 16
512	  7	99.8	17.2	 16
513	  7	68.3	12.6	 16
514	  7	73.3	18.2	 16
515	  7	74.0	11.9	 16
516	  7	76.0	12.6	 16
517	  7	315.0	38.8	 16
518	  7	112.5	14.1	 16
519	  7	142.5	21.2	 16
520	  7	97.3	13.7	 16
521	  7	104.5	17.0	 16
522	  7	104.5	19.8	 16
523	  7	89.5	15.0	 16
524	  7	125.3	20.3	 16
525	  7	82.0	10.2	 16
526	  7	61.5	9.3	 16
527	  7	76.5	11.5	 16
528	  7	104.0	31.3	 16
529	  7	144.5	24.8	 16
530	  7	128.0	21.4	 16
531	  7	111.5	18.5	 16
532	  7	216.0	20.6	 16
533	  7	70.5	11.0	 16
534	  7	109.3	16.9	 16
535	  7	100.5	13.4	 16
536	  7	290.0	48.3	 16
537	  7	171.3	31.3	 16
538	  7	190.5	25.5	 16
539	  7	746.3	118.3	 16
540	  7	181.5	22.2	 16
541	  7	88.5	13.8	 16
542	  7	96.0	15.3	 16
543	  7	75.8	11.3	 16
544	  7	71.3	7.7	 16
545	  7	93.3	12.4	 16
546	  7	148.0	24.3	 16
547	  7	131.3	22.2	 16
548	  7	201.8	25.6	 16
549	  7	220.3	26.1	 16
550	  7	90.3	14.8	 16
551	  7	129.0	18.0	 16
552	  7	187.0	24.5	 16
553	  7	82.0	10.8	 16
554	  7	108.3	17.5	 16
555	  7	66.5	10.6	 16
556	  7	74.0	16.1	 16
557	  7	98.3	14.1	 16
558	  7	206.0	32.9	 16
559	  7	484.8	68.1	 16
560	  7	79.3	12.5	 16
561	  7	132.3	26.0	 16
562	  7	184.0	31.4	 16
563	  7	384.5	44.1	 16
564	  7	100.0	13.6	 16
565	  7	206.3	34.2	 16
566	  7	86.3	15.5	 16
567	  7	69.5	10.3	 20
568	  7	142.8	23.8	 16
569	  7	152.0	20.6	 16
570	  7	114.3	15.1	 16
571	  7	97.3	9.2	 16
572	  7	104.0	16.6	 16
573	  7	129.0	22.6	 16
574	  7	119.5	10.6	 16
575	  7	184.8	25.4	 16
576	  7	92.0	12.3	 16
577	  7	356.0	33.0	 16
578	  7	107.0	11.1	 16
579	  7	95.0	10.6	 16
580	  7	143.3	18.1	 16
581	  7	135.8	20.3	 16
582	  7	213.8	28.2	 16
583	  7	75.0	9.4	 16
584	  7	114.0	27.7	 16
585	  7	163.8	21.8	 16
586	  7	82.5	16.8	 16
587	  7	114.3	24.2	 16
588	  7	93.5	14.5	 16
589	  7	99.5	17.2	 16
590	  7	103.0	19.6	 16
591	  7	89.0	16.4	 16
592	  7	1163.3	90.9	 16
593	  7	349.8	39.7	 16
594	  7	81.5	14.9	 16
595	  7	70.3	17.3	 16
596	  7	172.3	89.9	 16
597	  7	78.5	13.9	 16
598	  7	139.3	23.1	 16
599	  7	72.0	12.2	 16
600	  7	72.8	12.3	 16
601	  7	73.3	12.1	 16
602	  7	72.3	11.3	 16
603	  7	102.8	22.1	 16
604	  7	367.8	32.2	 16
605	  7	88.5	10.5	 16
606	  7	96.5	9.5	 16
607	  7	137.3	18.7	 16
608	  7	75.0	13.6	 16
609	  7	142.0	20.9	 16
610	  7	294.0	40.9	 16
611	  7	562.5	95.9	 16
612	  7	136.3	15.6	 16
613	  7	110.5	20.7	 16
614	  7	87.5	12.4	 16
615	  7	112.8	24.5	 16
616	  7	82.5	14.1	 16
617	  7	200.5	21.8	 16
618	  7	89.0	14.7	 16
619	  7	182.5	45.3	 16
620	  7	191.5	18.1	 16
621	  7	286.0	31.9	 16
622	  7	102.5	17.9	 16
623	  7	94.8	19.3	 16
624	  7	63.0	11.0	 16
625	  7	275.3	46.7	 16
626	  7	102.3	9.9	 16
627	  7	251.3	28.6	 16
628	  7	229.0	29.6	 16
629	  7	84.8	9.9	 16
630	  7	234.8	40.0	 16
631	  7	237.3	30.1	 16
632	  7	161.5	20.5	 16
633	  7	156.3	23.1	 16
634	  7	106.3	10.4	 16
635	  7	131.5	27.0	 16
636	  7	132.5	13.6	 16
637	  7	429.8	60.9	 16
638	  7	82.0	16.3	 16
639	  7	168.8	28.9	 16
640	  7	67.5	9.3	 16
641	  7	90.8	17.1	 16
642	  7	165.3	21.0	 16
643	  7	72.0	16.3	 16
644	  7	311.0	25.0	 16
645	  7	91.0	12.9	 16
646	  7	179.5	24.8	 16
647	  7	245.0	38.0	 16
648	  7	214.5	25.0	 16
649	  7	427.5	63.0	 16
650	  7	92.5	18.5	 16
651	  7	116.3	21.6	 16
652	  7	107.0	15.1	 16
653	  7	103.5	14.4	 16
654	  7	118.5	18.7	 16
655	  7	96.8	12.3	 16
656	  7	73.0	14.4	 16
657	  7	105.3	12.8	 16
658	  7	109.0	18.1	 16
659	  7	411.3	47.7	 16
660	  7	85.3	13.5	 16
661	  7	183.3	22.9	 16
662	  7	79.8	14.3	 16
663	  7	133.5	23.1	 16
664	  7	174.0	29.4	 16
665	  7	220.3	28.0	 16
666	  7	206.8	24.3	 16
667	  7	210.5	21.7	 16
668	  7	313.3	41.8	 16
669	  7	185.8	24.2	 16
670	  7	232.0	27.2	 16
671	  7	78.3	10.2	 16
672	  7	85.8	13.7	 16
673	  7	76.8	10.3	 16
674	  7	89.3	12.9	 16
675	  7	82.0	12.9	 16
676	  7	485.5	94.8	 16
677	  7	75.3	9.9	 16
678	  7	184.5	30.5	 16
679	  7	154.3	28.0	 16
680	  7	137.3	21.5	 16
681	  7	185.0	18.2	 16
682	  7	118.8	15.4	 16
683	  7	190.3	23.2	 16
684	  7	140.3	11.7	 16
685	  7	166.8	16.8	 16
686	  7	143.3	12.8	 16
687	  7	1950.3	257.5	 16
688	  7	149.5	71.0	 16
689	  7	176.8	46.5	 16
690	  7	126.5	28.2	 16
691	  7	149.8	25.7	 16
692	  7	161.3	23.0	 16
693	  7	310.0	38.1	 16
694	  7	128.5	36.5	 16
695	  7	77.8	15.8	 16
696	  7	67.8	7.0	 16
697	  7	79.0	13.2	 16
698	  7	83.0	19.2	 16
699	  7	202.8	52.3	 16
700	  7	109.3	14.7	 16
701	  7	91.8	10.2	 16
702	  7	139.5	13.0	 16
703	  7	75.3	11.3	 16
704	  7	84.0	11.5	 16
705	  7	88.3	12.0	 16
706	  7	187.5	23.3	 16
707	  7	218.0	42.1	 16
708	  7	93.3	10.2	 16
709	  7	111.3	16.1	 20
710	  7	156.0	27.2	 16
711	  7	168.8	25.8	 16
  0	  8	5138.3	1022.0	 16
  1	  8	114.0	25.6	 16
  2	  8	124.5	19.8	 16
  3	  8	156.3	16.9	 16
  4	  8	90.3	10.6	 16
  5	  8	89.5	13.8	 16
  6	  8	77.0	12.8	 15
  7	  8	78.3	9.9	 16
  8	  8	110.0	16.9	 16
  9	  8	452.0	79.6	 16
 10	  8	154.5	25.2	 16
 11	  8	77.0	11.2	 16
 12	  8	6603.5	803.0	 16
 13	  8	169.3	16.8	 16
 14	  8	191.8	32.8	 16
 15	  8	7658.8	552.6	 16
 16	  8	8394.8	968.3	 16
 17	  8	105.3	10.3	 16
 18	  8	7489.3	1100.9	 16
 19	  8	151.5	20.6	 16
 20	  8	137.5	16.9	 16
 21	  8	130.3	13.2	 16
 22	  8	7868.5	1432.4	 16
 23	  8	104.3	12.9	 16
 24	  8	7705.3	230.8	 16
 25	  8	6535.3	1232.4	 16
 26	  8	132.3	20.7	 16
 27	  8	137.3	25.7	 16
 28	  8	8238.8	1279.6	 16
 29	  8	120.0	17.8	 16
 30	  8	7247.5	1306.0	 16
 31	  8	140.5	17.1	 16
 32	  8	169.0	36.4	 16
 33	  8	147.5	23.1	 16
 34	  8	7718.5	1827.1	 16
 35	  8	91.5	14.2	 16
 36	  8	6587.5	1245.8	 16
 37	  8	137.0	11.2	 16
 38	  8	110.0	10.0	 16
 39	  8	134.5	17.9	 16
 40	  8	132.3	31.5	 16
 41	  8	116.0	22.2	 16
 42	  8	7807.5	213.9	 16
 43	  8	6481.0	1237.4	 16
 44	  8	167.8	25.6	 16
 45	  8	144.3	14.6	 16
 46	  8	7118.3	1171.2	 16
 47	  8	91.3	15.7	 16
 48	  8	142.8	22.4	 16
 49	  8	116.3	17.3	 16
 50	  8	113.0	16.6	 16
 51	  8	120.5	17.8	 16
 52	  8	112.8	14.1	 16
 53	  8	117.0	21.2	 16
 54	  8	7868.5	1335.5	 16
 55	  8	169.8	21.6	 16
 56	  8	161.3	28.5	 16
 57	  8	6760.5	1627.4	 16
 58	  8	123.0	21.8	 16
 59	  8	78.5	13.3	 16
 60	  8	90.0	13.8	 16
 61	  8	101.0	16.2	 16
 62	  8	7606.3	209.3	 16
 63	  8	6929.3	575.9	 16
 64	  8	7615.5	593.5	 16
 65	  8	8366.3	578.9	 16
 66	  8	9024.8	1093.8	 16
 67	  8	101.8	12.9	 16
 68	  8	6614.5	915.3	 16
 69	  8	133.3	16.7	 16
 70	  8	411.0	307.4	 16
 71	  8	7206.0	1120.3	 16
 72	  8	7406.3	693.9	 16
 73	  8	101.5	20.5	 16
 74	  8	110.3	9.6	 16
 75	  8	5653.0	544.5	 16
 76	  8	6166.3	465.7	 16
 77	  8	6387.3	633.1	 16
 78	  8	127.0	15.5	 16
 79	  8	88.3	18.1	 16
 80	  8	6169.0	570.0	 16
 81	  8	128.5	17.9	 16
 82	  8	127.3	20.7	 16
 83	  8	126.3	15.6	 16
 84	  8	7556.3	468.8	 16
 85	  8	98.3	15.5	 16
 86	  8	111.8	11.6	 16
 87	  8	137.5	23.8	 16
 88	  8	6231.5	448.8	 16
 89	  8	126.8	27.6	 16
 90	  8	113.3	13.6	 16
 91	  8	80.0	10.3	 16
 92	  8	113.8	18.0	 16
 93	  8	6445.8	469.9	 16
 94	  8	6648.5	582.7	 16
 95	  8	145.0	16.9	 12
 96	  8	137.8	32.4	 16
 97	  8	88.3	6.9	 16
 98	  8	127.0	14.8	 16
 99	  8	6566.0	926.6	 16
100	  8	6768.8	810.4	 16
101	  8	133.0	18.0	 16
102	  8	124.5	19.2	 16
103	  8	82.3	11.1	 16
104	  8	131.0	15.1	 16
105	  8	7560.8	529.6	 16
106	  8	7228.0	464.0	 16
107	  8	7565.8	541.3	 16
108	  8	119.0	12.2	 16
109	  8	95.8	15.8	 16
110	  8	77.5	13.5	 16
111	  8	89.0	13.4	 16
112	  8	100.3	17.3	 16
113	  8	158.0	23.0	 16
114	  8	82.5	17.3	 16
115	  8	100.3	14.0	 16
116	  8	119.8	19.8	 16
117	  8	134.3	17.6	 16
118	  8	103.0	14.1	 16
119	  8	222.3	17.7	 16
120	  8	229.3	23.1	 16
121	  8	280.5	36.3	 16
122	  8	161.3	27.5	 16
123	  8	138.3	24.1	 16
124	  8	110.0	17.8	 16
125	  8	679.8	67.3	 16
126	  8	1625.8	308.9	 16
127	  8	1708.3	271.7	 16
128	  8	1379.5	254.2	 16
129	  8	112.3	18.2	 16
130	  8	81.5	10.0	 16
131	  8	496.8	49.6	 16
132	  8	107.0	17.8	 16
133	  8	270.0	31.5	 16
134	  8	2005.8	389.1	 16
135	  8	606.0	70.1	 16
136	  8	219.0	38.0	 16
137	  8	147.3	20.7	 16
138	  8	113.5	16.2	 16
139	  8	84.8	11.4	 16
140	  8	77.0	8.5	 16
141	  8	100.0	12.9	 16
142	  8	95.3	12.9	 16
143	  8	102.8	21.6	 16
144	  8	96.3	12.3	 16
145	  8	145.5	17.2	 16
146	  8	84.0	17.9	 16
147	  8	98.3	13.5	 16
148	  8	86.0	14.3	 16
149	  8	81.0	12.2	 20
150	  8	77.0	9.5	 16
151	  8	84.3	11.3	 16
152	  8	103.5	35.3	 16
153	  8	88.0	15.6	 16
154	  8	135.5	22.8	 16
155	  8	86.0	13.1	 16
156	  8	518.3	37.9	 16
157	  8	504.5	52.1	 16
158	  8	137.3	22.3	 16
159	  8	304.3	35.9	 16
160	  8	153.5	17.4	 16
161	  8	88.0	11.5	 16
162	  8	198.3	26.6	 16
163	  8	123.5	13.0	 16
164	  8	97.0	11.0	 16
165	  8	120.3	11.8	 16
166	  8	91.3	22.0	 16
167	  8	88.0	14.2	 16
168	  8	109.3	14.0	 16
169	  8	100.3	11.7	 16
170	  8	100.3	17.7	 16
171	  8	92.5	19.6	 16
172	  8	77.3	10.4	 16
173	  8	80.0	14.9	 16
174	  8	97.8	17.9	 16
175	  8	94.3	13.9	 16
176	  8	85.3	11.6	 16
177	  8	77.8	13.9	 16
178	  8	88.8	15.6	 16
179	  8	103.3	14.4	 16
180	  8	215.0	26.2	 16
181	  8	91.5	10.5	 16
182	  8	116.3	20.3	 16
183	  8	73.3	9.7	 16
184	  8	77.5	13.1	 12
185	  8	107.8	16.9	 16
186	  8	144.3	24.7	 16
187	  8	73.3	11.3	 16
188	  8	87.8	17.4	 16
189	  8	161.3	17.8	 16
190	  8	92.3	14.0	 16
191	  8	101.0	19.4	 16
192	  8	97.0	16.0	 16
193	  8	95.3	16.4	 16
194	  8	161.0	25.5	 16
195	  8	86.3	8.8	 16
196	  8	110.3	18.4	 16
197	  8	90.3	11.4	 16
198	  8	98.3	15.0	 16
199	  8	150.5	25.9	 16
200	  8	146.0	23.7	 16
201	  8	85.5	14.7	 16
202	  8	92.0	13.2	 16
203	  8	121.5	19.3	 16
204	  8	105.3	16.6	 16
205	  8	76.3	10.0	 16
206	  8	103.3	15.3	 16
207	  8	86.3	9.6	 16
208	  8	84.3	32.6	 16
209	  8	71.3	7.6	 16
210	  8	84.0	14.7	 16
211	  8	158.8	19.6	 16
212	  8	81.0	11.8	 16
213	  8	111.8	15.7	 16
214	  8	95.3	10.2	 16
215	  8	87.3	8.9	 16
216	  8	99.3	25.2	 16
217	  8	110.3	18.4	 16
218	  8	88.3	13.3	 16
219	  8	65.3	8.5	 16
220	  8	93.5	10.6	 16
221	  8	107.8	10.6	 16
222	  8	91.5	14.7	 16
223	  8	96.0	17.9	 16
224	  8	88.5	15.3	 16
225	  8	180.5	20.7	 16
226	  8	168.5	22.5	 16
227	  8	157.3	20.1	 16
228	  8	179.8	34.3	 16
229	  8	75.0	10.3	 16
230	  8	78.3	9.7	 16
231	  8	109.0	14.3	 16
232	  8	81.5	12.4	 16
233	  8	111.3	25.3	 16
234	  8	87.3	20.7	 16
235	  8	110.0	16.6	 16
236	  8	136.5	21.7	 16
237	  8	79.8	16.0	 16
238	  8	79.8	13.8	 16
239	  8	168.5	18.5	 16
240	  8	80.8	16.4	 16
241	  8	115.5	18.3	 16
242	  8	109.5	16.5	 16
243	  8	101.5	11.6	 16
244	  8	137.3	19.1	 16
245	  8	82.0	13.4	 16
246	  8	78.3	12.3	 16
247	  8	102.5	16.0	 16
248	  8	94.0	16.4	 16
249	  8	103.3	22.2	 16
250	  8	99.0	13.8	 16
251	  8	211.3	31.5	 16
252	  8	260.3	29.1	 16
253	  8	79.5	13.8	 16
254	  8	89.3	17.5	 16
255	  8	97.5	35.9	 16
256	  8	80.8	15.2	 16
257	  8	147.0	21.7	 16
258	  8	78.0	13.8	 16
259	  8	119.8	19.1	 16
260	  8	101.5	13.7	 16
261	  8	134.3	15.7	 16
262	  8	84.3	13.5	 16
263	  8	672.8	108.3	 16
264	  8	91.0	12.2	 16
265	  8	90.5	25.3	 16
266	  8	86.0	10.6	 16
267	  8	127.5	23.7	 16
268	  8	175.8	18.5	 16
269	  8	72.3	11.7	 16
270	  8	91.3	17.9	 16
271	  8	214.8	32.9	 16
272	  8	198.5	25.0	 16
273	  8	74.3	10.9	 12
274	  8	81.8	12.1	 16
275	  8	91.3	12.7	 16
276	  8	261.3	54.3	 16
277	  8	139.5	18.9	 16
278	  8	120.8	19.5	 16
279	  8	92.3	13.2	 16
280	  8	83.0	18.4	 16
281	  8	110.3	23.8	 16
282	  8	280.8	30.1	 16
283	  8	123.3	13.8	 16
284	  8	85.3	11.6	 16
285	  8	87.5	11.8	 16
286	  8	88.3	15.2	 16
287	  8	123.8	23.5	 16
288	  8	117.0	16.0	 16
289	  8	218.3	26.5	 16
290	  8	194.5	34.6	 16
291	  8	126.0	22.9	 20
292	  8	82.5	15.0	 16
293	  8	167.3	19.9	 16
294	  8	105.5	15.5	 16
295	  8	124.5	20.6	 16
296	  8	107.0	17.0	 16
297	  8	100.5	15.7	 16
298	  8	280.0	29.2	 16
299	  8	179.5	20.4	 16
300	  8	255.5	35.2	 16
301	  8	150.3	14.5	 16
302	  8	72.8	11.0	 16
303	  8	110.8	24.8	 16
304	  8	98.0	14.5	 16
305	  8	93.8	16.3	 16
306	  8	314.5	32.6	 16
307	  8	93.3	12.6	 16
308	  8	110.0	15.7	 16
309	  8	112.5	27.0	 16
310	  8	135.0	25.7	 16
311	  8	223.0	35.9	 16
312	  8	97.3	12.1	 16
313	  8	222.0	24.1	 16
314	  8	255.0	38.9	 16
315	  8	129.3	22.3	 16
316	  8	132.3	17.2	 16
317	  8	105.0	17.9	 16
318	  8	87.3	11.5	 16
319	  8	88.5	32.7	 16
320	  8	72.3	9.3	 16
321	  8	185.5	22.4	 16
322	  8	105.8	14.9	 16
323	  8	100.3	21.5	 16
324	  8	152.8	17.7	 16
325	  8	152.3	21.3	 16
326	  8	353.3	42.8	 16
327	  8	142.8	11.8	 16
328	  8	82.5	9.6	 16
329	  8	163.3	20.0	 16
330	  8	528.0	36.0	 16
331	  8	167.0	18.6	 16
332	  8	98.0	14.3	 16
333	  8	2187.8	106.3	 16
334	  8	1818.0	292.0	 16
335	  8	124.0	24.2	 16
336	  8	94.0	10.4	 16
337	  8	78.3	15.1	 16
338	  8	76.3	18.8	 16
339	  8	93.8	15.9	 16
340	  8	122.3	16.0	 16
341	  8	88.3	15.9	 16
342	  8	102.8	18.5	 16
343	  8	79.8	10.7	 16
344	  8	109.3	11.0	 16
345	  8	96.0	19.3	 16
346	  8	200.3	26.8	 16
347	  8	609.5	45.1	 16
348	  8	211.3	25.0	 16
349	  8	88.3	14.2	 16
350	  8	95.5	13.5	 16
351	  8	82.5	14.8	 16
352	  8	132.3	22.6	 16
353	  8	96.3	16.2	 16
354	  8	85.5	13.7	 16
355	  8	157.0	23.3	 16
356	  8	129.3	14.2	 16
357	  8	234.3	29.6	 16
358	  8	755.0	70.7	 16
359	  8	154.0	15.5	 16
360	  8	117.8	20.4	 16
361	  8	85.0	13.8	 16
362	  8	62.0	8.4	 12
363	  8	91.8	17.4	 16
364	  8	74.8	19.1	 16
365	  8	72.0	11.4	 16
366	  8	171.5	66.4	 16
367	  8	123.3	15.7	 16
368	  8	100.0	15.7	 16
369	  8	139.3	23.3	 16
370	  8	109.3	14.2	 16
371	  8	102.5	16.0	 16
372	  8	143.3	19.4	 16
373	  8	130.8	24.4	 16
374	  8	95.5	16.0	 16
375	  8	81.3	12.5	 16
376	  8	80.3	15.5	 16
377	  8	130.0	27.5	 16
378	  8	290.8	37.1	 16
379	  8	136.5	11.0	 16
380	  8	151.8	15.8	 16
381	  8	91.5	16.3	 16
382	  8	84.0	19.0	 16
383	  8	522.0	57.8	 16
384	  8	123.5	17.2	 16
385	  8	84.5	14.2	 16
386	  8	84.8	13.4	 16
387	  8	184.3	43.0	 16
388	  8	189.8	26.0	 16
389	  8	75.0	14.6	 16
390	  8	82.3	15.0	 16
391	  8	74.0	12.5	 16
392	  8	67.0	12.0	 16
393	  8	82.3	14.8	 16
394	  8	159.0	19.7	 16
395	  8	272.3	28.1	 16
396	  8	295.0	43.6	 16
397	  8	268.0	28.4	 16
398	  8	85.0	14.1	 16
399	  8	92.5	13.4	 16
400	  8	89.8	13.6	 16
401	  8	334.0	41.1	 16
402	  8	92.3	13.4	 16
403	  8	87.5	14.0	 16
404	  8	86.5	15.4	 16
405	  8	75.3	11.9	 16
406	  8	108.8	18.5	 16
407	  8	65.5	7.3	 16
408	  8	80.0	11.0	 16
409	  8	106.0	20.3	 16
410	  8	104.3	13.5	 16
411	  8	221.3	35.1	 16
412	  8	149.8	18.9	 16
413	  8	128.8	18.2	 16
414	  8	67.5	7.9	 16
415	  8	175.5	41.6	 16
416	  8	73.5	7.7	 16
417	  8	68.8	9.5	 16
418	  8	103.0	16.7	 16
419	  8	71.3	11.1	 16
420	  8	65.3	11.9	 16
421	  8	74.3	16.2	 16
422	  8	82.0	14.9	 16
423	  8	119.8	19.6	 16
424	  8	432.0	38.8	 16
425	  8	130.3	17.8	 16
426	  8	368.0	47.6	 16
427	  8	94.3	17.7	 16
428	  8	82.0	10.4	 16
429	  8	94.8	37.4	 16
430	  8	100.3	17.2	 16
431	  8	85.8	14.0	 16
432	  8	84.3	14.2	 16
433	  8	68.0	10.9	 16
434	  8	113.0	19.5	 20
435	  8	122.5	17.3	 16
436	  8	103.0	14.1	 16
437	  8	155.3	25.1	 16
438	  8	234.3	61.7	 16
439	  8	84.3	12.8	 16
440	  8	88.0	11.2	 16
441	  8	90.3	17.5	 16
442	  8	76.0	16.0	 16
443	  8	122.3	15.6	 16
444	  8	103.0	18.2	 16
445	  8	100.5	19.9	 16
446	  8	90.3	9.5	 16
447	  8	123.5	17.3	 16
448	  8	227.5	35.6	 16
449	  8	1503.8	119.7	 16
450	  8	224.3	29.1	 16
451	  8	77.3	9.3	 12
452	  8	160.3	17.1	 16
453	  8	217.0	210.6	 16
454	  8	251.8	39.5	 16
455	  8	118.0	24.6	 16
456	  8	122.0	19.7	 16
457	  8	70.3	13.8	 16
458	  8	92.5	25.6	 16
459	  8	88.0	14.6	 16
460	  8	201.8	28.3	 16
461	  8	71.3	12.3	 16
462	  8	107.3	19.0	 16
463	  8	89.5	16.8	 16
464	  8	65.5	13.6	 16
465	  8	82.3	27.3	 16
466	  8	77.5	12.9	 16
467	  8	138.3	21.6	 16
468	  8	79.0	15.9	 16
469	  8	99.5	317.5	 16
470	  8	105.8	16.7	 16
471	  8	72.5	12.5	 16
472	  8	96.0	15.6	 16
473	  8	131.3	21.7	 16
474	  8	69.8	14.4	 16
475	  8	76.8	11.9	 16
476	  8	73.5	13.1	 16
477	  8	90.0	13.4	 16
478	  8	83.3	13.1	 16
479	  8	70.0	10.3	 16
480	  8	76.3	11.6	 16
481	  8	74.8	15.8	 16
482	  8	94.3	13.2	 16
483	  8	151.5	24.2	 16
484	  8	152.0	22.1	 16
485	  8	202.8	31.5	 16
486	  8	161.5	17.8	 16
487	  8	185.8	25.6	 16
488	  8	146.0	18.2	 16
489	  8	91.5	18.0	 16
490	  8	98.8	15.3	 16
491	  8	78.0	13.7	 16
492	  8	89.8	36.6	 16
493	  8	185.3	24.4	 16
494	  8	160.3	18.0	 16
495	  8	230.0	28.5	 16
496	  8	91.0	17.9	 16
497	  8	96.3	15.4	 16
498	  8	105.3	18.4	 16
499	  8	95.8	11.4	 16
500	  8	95.0	12.7	 16
501	  8	145.0	30.2	 16
502	  8	148.3	15.5	 16
503	  8	180.0	30.0	 16
504	  8	116.0	21.5	 16
505	  8	86.5	10.4	 16
506	  8	123.5	19.2	 16
507	  8	148.3	23.0	 16
508	  8	97.0	19.1	 16
509	  8	92.0	10.0	 16
510	  8	90.3	24.5	 16
511	  8	91.3	12.4	 16
512	  8	80.0	16.5	 16
513	  8	79.0	11.7	 16
514	  8	68.0	10.5	 16
515	  8	73.3	12.1	 16
516	  8	69.3	9.0	 16
517	  8	103.0	14.8	 16
518	  8	115.5	21.2	 16
519	  8	309.5	31.0	 16
520	  8	135.3	16.9	 16
521	  8	83.8	12.2	 16
522	  8	100.8	13.1	 16
523	  8	102.8	18.8	 16
524	  8	99.3	14.5	 16
525	  8	70.3	14.7	 16
526	  8	73.0	16.4	 16
527	  8	87.0	15.2	 16
528	  8	98.5	13.3	 16
529	  8	83.0	9.8	 16
530	  8	127.0	18.3	 16
531	  8	363.8	54.0	 16
532	  8	187.5	25.7	 16
533	  8	83.5	15.5	 16
534	  8	73.5	14.1	 16
535	  8	79.0	9.3	 16
536	  8	103.3	14.2	 16
537	  8	85.3	9.3	 16
538	  8	285.3	27.3	 16
539	  8	380.0	32.0	 16
540	  8	189.0	27.6	 12
541	  8	88.3	7.7	 16
542	  8	79.3	14.6	 16
543	  8	78.3	13.6	 16
544	  8	83.0	13.0	 16
545	  8	85.8	12.7	 16
546	  8	96.0	11.8	 16
547	  8	71.0	11.3	 16
548	  8	153.5	20.5	 16
549	  8	118.8	18.3	 16
550	  8	83.8	16.0	 16
551	  8	108.0	14.3	 16
552	  8	193.0	18.0	 16
553	  8	95.8	15.4	 16
554	  8	81.0	15.2	 16
555	  8	71.0	11.1	 16
556	  8	85.3	16.2	 16
557	  8	84.3	16.7	 16
558	  8	199.8	58.2	 16
559	  8	285.3	34.8	 16
560	  8	66.5	9.3	 16
561	  8	103.5	20.3	 16
562	  8	131.3	16.9	 16
563	  8	686.8	59.9	 16
564	  8	98.8	17.6	 16
565	  8	92.8	12.3	 16
566	  8	79.0	11.8	 16
567	  8	80.8	15.3	 16
568	  8	94.3	13.6	 16
569	  8	138.0	22.8	 16
570	  8	131.5	25.0	 16
571	  8	82.0	14.9	 16
572	  8	123.5	20.1	 16
573	  8	118.8	21.3	 16
574	  8	110.8	17.9	 16
575	  8	108.5	14.8	 16
576	  8	89.0	13.2	 20
577	  8	98.3	14.2	 16
578	  8	70.5	11.5	 16
579	  8	72.8	11.5	 16
580	  8	107.5	14.8	 16
581	  8	102.8	15.1	 16
582	  8	111.8	19.6	 16
583	  8	78.3	13.7	 16
584	  8	82.3	11.4	 16
585	  8	82.3	9.8	 16
586	  8	73.0	12.0	 16
587	  8	86.5	17.9	 16
588	  8	62.5	14.3	 16
589	  8	119.3	15.8	 16
590	  8	128.8	21.7	 16
591	  8	92.8	12.5	 16
592	  8	243.0	43.0	 16
593	  8	135.0	19.4	 16
594	  8	69.5	13.4	 16
595	  8	74.3	13.2	 16
596	  8	156.3	19.8	 16
597	  8	71.5	10.6	 16
598	  8	109.5	11.9	 16
599	  8	75.8	15.5	 16
600	  8	63.0	9.5	 16
601	  8	81.3	12.4	 16
602	  8	73.8	11.3	 16
603	  8	100.0	16.2	 16
604	  8	167.5	37.2	 16
605	  8	76.5	11.8	 16
606	  8	74.5	11.9	 16
607	  8	96.3	15.5	 16
608	  8	67.0	9.6	 16
609	  8	109.3	20.3	 16
610	  8	82.3	24.1	 16
611	  8	107.0	17.5	 16
612	  8	106.3	12.7	 16
613	  8	75.3	7.9	 16
614	  8	78.3	10.2	 16
615	  8	193.3	18.1	 16
616	  8	105.0	18.6	 16
617	  8	238.5	32.7	 16
618	  8	79.5	12.0	 16
619	  8	115.0	19.6	 16
620	  8	73.5	10.7	 16
621	  8	165.0	29.7	 16
622	  8	88.5	14.4	 16
623	  8	108.0	14.6	 16
624	  8	69.0	8.1	 16
625	  8	160.8	21.2	 16
626	  8	95.5	18.5	 16
627	  8	321.5	46.2	 16
628	  8	153.0	18.6	 16
629	  8	75.0	15.9	 12
630	  8	171.3	22.1	 16
631	  8	185.3	21.9	 16
632	  8	110.0	16.6	 16
633	  8	104.5	11.3	 16
634	  8	134.5	19.5	 16
635	  8	102.0	15.8	 16
636	  8	90.3	12.5	 16
637	  8	113.5	22.9	 16
638	  8	71.8	16.5	 16
639	  8	71.0	21.3	 16
640	  8	69.0	7.1	 16
641	  8	93.0	12.9	 16
642	  8	127.3	17.7	 16
643	  8	67.0	13.3	 16
644	  8	242.0	24.0	 16
645	  8	88.3	13.6	 16
646	  8	246.3	26.4	 16
647	  8	225.8	32.7	 16
648	  8	182.3	21.7	 16
649	  8	167.5	14.4	 16
650	  8	79.0	11.9	 16
651	  8	84.3	10.6	 16
652	  8	86.8	12.1	 16
653	  8	93.0	17.1	 16
654	  8	77.8	16.8	 16
655	  8	84.3	13.8	 16
656	  8	77.0	11.3	 16
657	  8	70.3	8.3	 16
658	  8	81.5	14.5	 16
659	  8	254.3	39.8	 16
660	  8	76.5	13.0	 16
661	  8	98.5	19.0	 16
662	  8	70.0	11.2	 16
663	  8	83.0	10.5	 16
664	  8	98.3	18.2	 16
665	  8	237.3	31.1	 16
666	  8	244.5	34.2	 16
667	  8	243.5	22.8	 16
668	  8	128.5	17.8	 16
669	  8	168.5	19.5	 16
670	  8	160.3	20.2	 16
671	  8	70.3	10.1	 16
672	  8	81.0	11.3	 16
673	  8	72.3	10.0	 16
674	  8	75.3	12.2	 16
675	  8	81.0	26.8	 16
676	  8	127.3	15.3	 16
677	  8	75.3	11.6	 16
678	  8	173.3	17.2	 16
679	  8	97.5	14.5	 16
680	  8	115.3	14.6	 16
681	  8	146.5	21.2	 16
682	  8	143.0	13.3	 16
683	  8	333.5	46.8	 16
684	  8	143.5	18.8	 16
685	  8	153.5	23.2	 16
686	  8	157.5	23.9	 16
687	  8	706.3	86.2	 16
688	  8	112.3	11.2	 16
689	  8	101.3	20.6	 16
690	  8	172.0	22.2	 16
691	  8	149.8	28.0	 16
692	  8	199.0	28.8	 16
693	  8	90.0	12.8	 16
694	  8	85.5	14.6	 16
695	  8	76.0	14.2	 16
696	  8	76.0	10.5	 16
697	  8	79.0	8.5	 16
698	  8	83.5	17.6	 16
699	  8	92.0	16.1	 16
700	  8	114.0	34.4	 16
701	  8	84.0	14.6	 16
702	  8	130.8	16.6	 16
703	  8	73.3	10.5	 16
704	  8	86.8	8.5	 16
705	  8	81.5	15.5	 16
706	  8	157.3	20.9	 16
707	  8	153.5	21.1	 16
708	  8	88.0	11.9	 16
709	  8	117.8	14.2	 16
710	  8	76.5	21.1	 16
711	  8	6527.8	1072.2	 16
  0	  9	128.3	19.7	 16
  1	  9	200.8	35.6	 16
  2	  9	102.0	20.4	 16
  3	  9	111.3	21.4	 16
  4	  9	91.0	14.9	 16
  5	  9	78.0	8.9	 16
  6	  9	413.5	75.3	 16
  7	  9	78.0	8.3	 16
  8	  9	74.5	15.4	 16
  9	  9	82.8	14.5	 16
 10	  9	164.0	16.4	 16
 11	  9	77.3	16.1	 16
 12	  9	6648.5	1062.4	 16
 13	  9	185.0	24.1	 16
 14	  9	168.3	19.7	 16
 15	  9	192.5	26.1	 16
 16	  9	8817.0	1378.6	 20
 17	  9	109.8	17.1	 16
 18	  9	8481.0	283.0	 16
 19	  9	7566.3	1778.0	 16
 20	  9	7605.8	1621.9	 16
 21	  9	7506.8	1694.2	 16
 22	  9	154.8	34.4	 16
 23	  9	101.5	19.3	 16
 24	  9	7365.8	1355.2	 16
 25	  9	133.0	20.3	 16
 26	  9	128.8	16.7	 16
 27	  9	140.5	18.6	 16
 28	  9	8867.3	1452.9	 16
 29	  9	110.3	18.0	 16
 30	  9	8544.3	349.3	 16
 31	  9	7508.3	576.7	 16
 32	  9	7800.3	1783.2	 16
 33	  9	7451.8	1995.1	 16
 34	  9	110.3	14.1	 16
 35	  9	89.5	19.0	 16
 36	  9	6513.3	1393.2	 16
 37	  9	128.8	23.4	 16
 38	  9	118.3	14.6	 16
 39	  9	120.8	16.4	 16
 40	  9	125.3	14.1	 16
 41	  9	109.5	25.5	 16
 42	  9	7391.0	1487.9	 16
 43	  9	157.0	24.8	 16
 44	  9	146.3	20.9	 16
 45	  9	147.8	21.5	 16
 46	  9	7457.5	1441.1	 16
 47	  9	84.0	14.8	 16
 48	  9	111.8	15.8	 16
 49	  9	133.3	24.8	 16
 50	  9	6066.3	1187.9	 16
 51	  9	117.3	15.0	 16
 52	  9	122.0	23.9	 16
 53	  9	91.0	23.1	 16
 54	  9	8422.3	216.1	 16
 55	  9	7176.8	545.4	 16
 56	  9	6592.0	1240.0	 16
 57	  9	112.3	20.8	 16
 58	  9	107.0	13.1	 16
 59	  9	73.3	14.2	 16
 60	  9	77.5	12.2	 16
 61	  9	96.5	15.0	 16
 62	  9	7684.3	1240.1	 16
 63	  9	144.8	25.6	 16
 64	  9	123.3	19.7	 16
 65	  9	133.5	20.8	 16
 66	  9	8887.8	1140.9	 16
 67	  9	101.3	14.5	 16
 68	  9	6486.0	947.1	 16
 69	  9	141.8	20.6	 16
 70	  9	112.0	16.4	 16
 71	  9	121.5	20.2	 16
 72	  9	7465.5	837.0	 16
 73	  9	83.0	12.2	 16
 74	  9	115.5	14.5	 16
 75	  9	108.3	15.5	 16
 76	  9	100.0	12.0	 16
 77	  9	116.3	14.6	 16
 78	  9	126.5	19.3	 16
 79	  9	90.3	14.4	 16
 80	  9	6259.0	755.4	 16
 81	  9	133.0	17.1	 16
 82	  9	114.3	13.6	 16
 83	  9	114.3	15.8	 16
 84	  9	7500.5	590.5	 16
 85	  9	96.3	13.0	 16
 86	  9	138.3	17.1	 16
 87	  9	120.5	28.1	 16
 88	  9	6294.0	529.4	 16
 89	  9	123.0	17.6	 16
 90	  9	96.3	17.0	 16
 91	  9	88.5	9.2	 16
 92	  9	109.3	21.5	 16
 93	  9	128.5	17.4	 16
 94	  9	128.8	21.9	 16
 95	  9	6604.0	661.1	 16
 96	  9	135.3	19.9	 16
 97	  9	87.0	14.7	 16
 98	  9	130.0	27.0	 16
 99	  9	117.8	17.8	 16
100	  9	122.3	16.6	 16
101	  9	7096.0	567.8	 16
102	  9	133.0	15.5	 16
103	  9	93.8	23.8	 16
104	  9	6711.5	572.5	 16
105	  9	123.8	17.1	 16
106	  9	107.8	15.9	 16
107	  9	122.5	16.4	 16
108	  9	8380.8	581.2	 16
109	  9	94.5	13.3	 16
110	  9	69.8	10.3	 16
111	  9	367.3	37.0	 16
112	  9	1114.5	112.5	 16
113	  9	308.8	37.6	 16
114	  9	214.0	23.2	 16
115	  9	79.0	9.5	 16
116	  9	82.0	10.1	 16
117	  9	82.3	15.7	 16
118	  9	91.0	11.3	 16
119	  9	136.3	21.0	 16
120	  9	193.8	32.6	 16
121	  9	106.0	15.2	 16
122	  9	76.3	9.4	 16
123	  9	101.5	15.8	 16
124	  9	242.3	19.5	 16
125	  9	86.3	14.3	 16
126	  9	87.8	11.9	 16
127	  9	289.5	54.1	 16
128	  9	84.3	14.3	 16
129	  9	101.0	15.2	 16
130	  9	78.8	16.1	 16
131	  9	147.0	20.7	 16
132	  9	229.5	39.1	 16
133	  9	116.8	10.9	 16
134	  9	848.8	115.5	 16
135	  9	69.0	7.6	 16
136	  9	98.8	9.8	 16
137	  9	99.3	12.4	 16
138	  9	65.5	11.1	 16
139	  9	91.3	13.4	 16
140	  9	78.0	9.6	 16
141	  9	154.0	25.3	 16
142	  9	158.8	20.0	 16
143	  9	540.5	49.0	 16
144	  9	100.3	8.4	 16
145	  9	122.3	17.5	 16
146	  9	114.8	16.0	 16
147	  9	88.3	10.8	 16
148	  9	113.3	22.4	 16
149	  9	103.0	13.1	 16
150	  9	229.8	34.9	 16
151	  9	89.8	14.5	 16
152	  9	1422.5	336.6	 16
153	  9	308.3	46.0	 16
154	  9	170.3	26.9	 16
155	  9	1088.3	150.3	 16
156	  9	317.3	52.5	 16
157	  9	656.3	119.1	 16
158	  9	164.0	21.5	 20
159	  9	275.3	23.8	 16
160	  9	572.3	44.7	 16
161	  9	79.5	13.8	 16
162	  9	79.5	13.9	 16
163	  9	105.3	16.3	 16
164	  9	143.0	23.0	 16
165	  9	296.3	36.1	 16
166	  9	108.8	30.9	 16
167	  9	101.3	12.3	 16
168	  9	125.3	18.5	 16
169	  9	747.5	50.6	 16
170	  9	1852.5	194.4	 16
171	  9	83.3	10.0	 16
172	  9	142.8	23.0	 16
173	  9	151.5	18.7	 16
174	  9	260.5	39.1	 16
175	  9	225.5	32.8	 16
176	  9	88.3	15.5	 16
177	  9	83.3	11.8	 16
178	  9	77.5	8.3	 16
179	  9	112.3	22.7	 16
180	  9	82.3	12.1	 16
181	  9	86.3	14.5	 16
182	  9	84.5	60.0	 16
183	  9	81.3	13.9	 16
184	  9	91.8	14.9	 16
185	  9	99.3	40.8	 16
186	  9	95.3	11.8	 16
187	  9	85.3	9.5	 16
188	  9	80.8	12.9	 16
189	  9	78.5	16.7	 16
190	  9	92.3	12.4	 16
191	  9	376.5	54.3	 16
192	  9	253.3	28.6	 16
193	  9	103.0	39.8	 16
194	  9	71.0	9.5	 16
195	  9	177.3	23.5	 16
196	  9	87.5	14.3	 16
197	  9	92.3	14.3	 16
198	  9	166.3	19.7	 16
199	  9	131.8	20.4	 16
200	  9	87.8	17.5	 16
201	  9	1643.8	187.2	 16
202	  9	92.5	16.1	 16
203	  9	85.3	14.5	 16
204	  9	96.8	14.3	 16
205	  9	226.5	25.2	 16
206	  9	390.3	74.2	 16
207	  9	88.8	12.3	 16
208	  9	135.3	21.4	 16
209	  9	78.8	15.1	 16
210	  9	209.0	36.5	 16
211	  9	120.8	22.4	 16
212	  9	371.3	33.1	 16
213	  9	246.5	55.4	 16
214	  9	187.0	25.3	 16
215	  9	112.3	15.4	 16
216	  9	127.8	16.0	 16
217	  9	103.3	17.1	 16
218	  9	101.5	19.7	 16
219	  9	65.3	14.1	 16
220	  9	161.5	28.6	 16
221	  9	152.0	26.7	 16
222	  9	114.3	17.7	 16
223	  9	171.8	27.1	 16
224	  9	135.8	22.5	 16
225	  9	179.3	25.8	 16
226	  9	82.8	15.3	 16
227	  9	137.3	18.2	 16
228	  9	71.0	11.5	 16
229	  9	244.5	39.3	 16
230	  9	120.0	20.2	 16
231	  9	752.0	99.8	 16
232	  9	140.5	14.4	 16
233	  9	413.3	50.9	 16
234	  9	89.8	10.0	 16
235	  9	404.0	53.2	 16
236	  9	187.0	17.1	 16
237	  9	182.3	25.8	 16
238	  9	597.0	68.8	 16
239	  9	121.3	19.8	 16
240	  9	287.3	40.9	 16
241	  9	126.3	13.8	 16
242	  9	88.8	15.7	 16
243	  9	79.0	12.7	 16
244	  9	81.3	18.5	 16
245	  9	154.0	16.6	 16
246	  9	67.8	9.2	 16
247	  9	3713.5	622.4	 16
248	  9	135.0	18.7	 16
249	  9	138.5	21.7	 16
250	  9	130.0	12.1	 16
251	  9	192.0	23.2	 16
252	  9	374.3	44.5	 16
253	  9	297.0	42.8	 16
254	  9	140.3	23.0	 16
255	  9	73.5	10.7	 16
256	  9	90.3	11.9	 16
257	  9	90.3	15.6	 16
258	  9	662.3	197.4	 16
259	  9	156.0	21.2	 16
260	  9	161.0	24.0	 16
261	  9	134.0	17.8	 16
262	  9	223.8	31.1	 16
263	  9	72.3	12.7	 16
264	  9	78.3	12.4	 16
265	  9	76.0	10.7	 16
266	  9	232.5	26.7	 16
267	  9	268.0	37.2	 16
268	  9	115.5	18.1	 16
269	  9	342.0	33.4	 16
270	  9	82.3	13.5	 16
271	  9	79.5	12.4	 16
272	  9	90.5	17.6	 16
273	  9	84.3	11.4	 16
274	  9	94.8	16.9	 16
275	  9	108.3	18.8	 16
276	  9	74.5	13.9	 16
277	  9	82.3	11.4	 16
278	  9	115.3	19.5	 16
279	  9	180.5	25.5	 16
280	  9	88.5	13.6	 16
281	  9	100.5	16.4	 16
282	  9	181.8	20.9	 16
283	  9	77.8	12.9	 16
284	  9	95.0	18.6	 16
285	  9	91.8	13.2	 16
286	  9	82.3	12.5	 16
287	  9	79.3	10.7	 16
288	  9	105.0	17.3	 16
289	  9	176.8	20.1	 16
290	  9	182.0	23.1	 16
291	  9	192.3	18.7	 16
292	  9	469.0	78.7	 16
293	  9	136.5	24.3	 16
294	  9	1416.0	164.1	 16
295	  9	459.8	36.2	 16
296	  9	146.0	22.5	 16
297	  9	365.0	50.9	 16
298	  9	101.8	16.8	 16
299	  9	174.8	23.7	 16
300	  9	192.0	36.9	 20
301	  9	102.8	16.5	 16
302	  9	85.8	14.0	 16
303	  9	105.3	17.3	 16
304	  9	131.0	18.6	 16
305	  9	607.8	77.4	 16
306	  9	184.3	29.1	 16
307	  9	158.8	23.6	 16
308	  9	352.0	38.1	 16
309	  9	168.0	19.3	 16
310	  9	402.0	66.0	 16
311	  9	596.3	104.2	 16
312	  9	103.5	14.2	 16
313	  9	296.3	55.8	 16
314	  9	175.3	20.8	 16
315	  9	104.0	9.7	 16
316	  9	259.5	29.7	 16
317	  9	453.0	78.3	 16
318	  9	94.0	16.3	 16
319	  9	97.8	17.4	 16
320	  9	207.0	39.0	 16
321	  9	165.8	25.1	 16
322	  9	208.3	24.3	 16
323	  9	89.5	27.5	 16
324	  9	100.0	15.7	 16
325	  9	112.0	17.5	 16
326	  9	106.5	38.9	 16
327	  9	94.8	16.2	 16
328	  9	368.5	29.8	 16
329	  9	134.3	19.3	 16
330	  9	161.0	24.2	 16
331	  9	91.3	9.6	 16
332	  9	418.8	44.7	 16
333	  9	310.8	24.8	 16
334	  9	92.0	9.4	 16
335	  9	69.0	17.4	 16
336	  9	81.0	16.0	 16
337	  9	79.8	11.3	 16
338	  9	92.8	10.3	 16
339	  9	182.0	23.7	 16
340	  9	130.0	21.3	 16
341	  9	95.3	13.0	 16
342	  9	172.0	21.3	 16
343	  9	171.8	25.4	 16
344	  9	635.3	51.6	 16
345	  9	81.5	12.1	 16
346	  9	1185.5	165.2	 16
347	  9	133.8	20.6	 16
348	  9	756.3	43.5	 16
349	  9	107.5	19.9	 16
350	  9	1057.8	83.5	 16
351	  9	135.8	15.5	 16
352	  9	212.5	23.0	 16
353	  9	153.5	17.5	 16
354	  9	138.5	23.4	 16
355	  9	265.0	35.9	 16
356	  9	694.5	97.8	 16
357	  9	175.3	20.0	 16
358	  9	219.5	30.4	 16
359	  9	155.0	24.3	 16
360	  9	137.3	25.1	 16
361	  9	150.5	27.7	 16
362	  9	93.0	16.4	 16
363	  9	290.8	39.5	 16
364	  9	75.3	10.5	 16
365	  9	83.8	10.4	 16
366	  9	77.0	17.1	 16
367	  9	71.3	11.8	 16
368	  9	87.0	13.7	 16
369	  9	109.5	12.8	 16
370	  9	145.5	16.5	 16
371	  9	207.8	29.9	 16
372	  9	114.8	10.9	 16
373	  9	75.3	13.7	 16
374	  9	102.0	45.5	 16
375	  9	88.3	17.3	 16
376	  9	152.0	20.1	 16
377	  9	672.3	51.0	 16
378	  9	2726.0	212.8	 16
379	  9	134.3	16.4	 16
380	  9	81.0	11.0	 16
381	  9	96.3	16.2	 16
382	  9	149.0	14.6	 16
383	  9	185.3	25.8	 16
384	  9	392.8	39.2	 16
385	  9	339.8	56.8	 16
386	  9	168.3	29.3	 16
387	  9	497.3	37.5	 16
388	  9	167.5	23.2	 16
389	  9	86.5	9.3	 16
390	  9	84.3	15.0	 16
391	  9	130.5	18.6	 16
392	  9	99.8	14.6	 16
393	  9	83.5	13.4	 16
394	  9	1558.5	162.1	 16
395	  9	159.5	23.0	 16
396	  9	74.3	18.6	 16
397	  9	81.5	12.4	 16
398	  9	125.8	16.1	 16
399	  9	84.0	8.4	 16
400	  9	72.3	13.1	 16
401	  9	87.8	12.2	 16
402	  9	77.3	10.8	 16
403	  9	100.3	19.8	 16
404	  9	96.8	15.6	 16
405	  9	114.3	16.4	 16
406	  9	84.8	15.7	 16
407	  9	150.3	21.4	 16
408	  9	123.8	67.3	 16
409	  9	118.3	14.8	 16
410	  9	87.5	16.1	 16
411	  9	360.3	141.6	 16
412	  9	181.0	20.9	 16
413	  9	121.5	18.2	 16
414	  9	114.0	13.2	 16
415	  9	249.8	29.8	 16
416	  9	87.0	12.4	 16
417	  9	98.3	15.3	 16
418	  9	72.3	15.3	 16
419	  9	234.0	37.6	 16
420	  9	495.8	58.1	 16
421	  9	92.5	12.6	 16
422	  9	66.0	16.1	 16
423	  9	613.0	71.1	 16
424	  9	227.5	34.8	 16
425	  9	87.5	79.3	 16
426	  9	72.3	13.3	 16
427	  9	126.5	23.1	 16
428	  9	96.3	20.4	 16
429	  9	64.0	8.4	 16
430	  9	79.0	15.8	 16
431	  9	77.3	28.2	 16
432	  9	70.5	31.4	 16
433	  9	671.5	81.0	 16
434	  9	80.3	13.2	 16
435	  9	83.0	14.9	 16
436	  9	72.0	12.2	 16
437	  9	74.0	8.9	 16
438	  9	903.3	162.3	 16
439	  9	108.0	12.9	 16
440	  9	183.8	21.7	 16
441	  9	157.3	23.8	 16
442	  9	959.5	110.3	 16
443	  9	257.8	41.1	 20
444	  9	275.8	40.6	 16
445	  9	87.0	91.8	 16
446	  9	138.0	25.3	 16
447	  9	88.3	17.6	 16
448	  9	82.3	10.3	 16
449	  9	74.3	10.6	 16
450	  9	156.3	22.0	 16
451	  9	267.5	30.2	 16
452	  9	79.0	12.1	 16
453	  9	170.0	17.6	 16
454	  9	878.8	88.3	 16
455	  9	156.0	18.2	 16
456	  9	107.5	15.0	 16
457	  9	70.0	11.2	 16
458	  9	82.3	11.3	 16
459	  9	75.5	13.0	 16
460	  9	454.5	51.3	 16
461	  9	81.0	13.2	 16
462	  9	83.5	14.3	 16
463	  9	146.0	24.2	 16
464	  9	81.8	13.6	 16
465	  9	151.3	25.2	 16
466	  9	218.3	28.1	 16
467	  9	79.3	14.7	 16
468	  9	71.3	12.3	 16
469	  9	108.0	17.2	 16
470	  9	98.0	12.5	 16
471	  9	91.8	12.8	 16
472	  9	134.3	20.1	 16
473	  9	128.5	18.4	 16
474	  9	166.8	20.2	 16
475	  9	78.5	11.7	 16
476	  9	79.5	12.6	 16
477	  9	83.5	9.7	 16
478	  9	171.0	36.3	 16
479	  9	70.3	14.0	 16
480	  9	133.5	16.1	 16
481	  9	105.0	17.2	 16
482	  9	81.3	11.5	 16
483	  9	73.0	8.3	 16
484	  9	316.3	38.6	 16
485	  9	75.8	14.9	 16
486	  9	721.8	147.0	 16
487	  9	201.5	32.0	 16
488	  9	164.8	22.9	 16
489	  9	66.5	10.1	 16
490	  9	106.0	10.7	 16
491	  9	100.0	13.8	 16
492	  9	190.0	23.6	 16
493	  9	292.3	31.2	 16
494	  9	445.8	37.3	 16
495	  9	213.0	15.8	 16
496	  9	155.0	22.2	 16
497	  9	461.3	50.1	 16
498	  9	172.0	23.5	 16
499	  9	125.0	20.3	 16
500	  9	104.0	13.9	 16
501	  9	89.8	14.2	 16
502	  9	90.0	18.4	 16
503	  9	108.0	17.7	 16
504	  9	132.3	15.2	 16
505	  9	410.0	56.3	 16
506	  9	421.5	45.7	 16
507	  9	196.3	23.1	 16
508	  9	924.5	122.6	 16
509	  9	76.3	11.4	 16
510	  9	304.8	56.1	 16
511	  9	107.5	15.7	 16
512	  9	76.3	15.4	 16
513	  9	103.5	15.4	 16
514	  9	251.5	40.1	 16
515	  9	75.0	13.0	 16
516	  9	116.0	21.7	 16
517	  9	69.0	9.8	 16
518	  9	73.3	9.6	 16
519	  9	112.3	18.7	 16
520	  9	164.3	19.3	 16
521	  9	79.3	10.9	 16
522	  9	83.0	14.0	 16
523	  9	77.0	15.4	 16
524	  9	69.8	9.9	 16
525	  9	89.3	11.3	 16
526	  9	139.0	24.4	 16
527	  9	101.0	18.8	 16
528	  9	80.0	14.5	 16
529	  9	88.0	11.9	 16
530	  9	191.5	25.2	 16
531	  9	90.0	15.5	 16
532	  9	70.8	12.2	 16
533	  9	76.5	11.3	 16
534	  9	80.3	16.3	 16
535	  9	126.3	18.6	 16
536	  9	97.8	14.3	 16
537	  9	107.5	11.1	 16
538	  9	108.3	23.3	 16
539	  9	92.5	16.4	 16
540	  9	286.8	48.4	 16
541	  9	88.0	19.0	 16
542	  9	75.5	16.0	 16
543	  9	99.8	16.0	 16
544	  9	88.8	18.5	 16
545	  9	359.3	60.8	 16
546	  9	139.3	21.4	 16
547	  9	156.0	27.9	 16
548	  9	133.5	15.8	 16
549	  9	114.0	13.6	 16
550	  9	138.0	18.3	 16
551	  9	273.0	65.5	 16
552	  9	143.3	24.0	 16
553	  9	169.3	32.0	 16
554	  9	135.0	25.7	 16
555	  9	77.8	10.6	 16
556	  9	107.0	13.1	 16
557	  9	84.3	14.3	 16
558	  9	93.0	16.0	 16
559	  9	84.5	13.8	 16
560	  9	82.5	14.7	 16
561	  9	290.3	46.5	 16
562	  9	79.0	11.5	 16
563	  9	116.0	16.0	 16
564	  9	164.8	34.1	 16
565	  9	330.0	73.9	 16
566	  9	686.3	123.6	 16
567	  9	89.5	15.3	 16
568	  9	87.8	24.0	 16
569	  9	79.0	13.6	 16
570	  9	306.0	49.3	 16
571	  9	612.3	108.3	 16
572	  9	184.0	25.4	 16
573	  9	116.3	16.4	 16
574	  9	167.0	20.7	 16
575	  9	196.3	31.2	 16
576	  9	146.8	26.9	 16
577	  9	112.8	17.4	 16
578	  9	80.3	11.8	 16
579	  9	76.0	10.1	 16
580	  9	121.8	20.3	 16
581	  9	366.3	72.1	 16
582	  9	242.5	25.9	 16
583	  9	147.0	35.9	 16
584	  9	112.3	17.9	 16
585	  9	175.5	22.2	 20
586	  9	185.3	88.4	 16
587	  9	68.3	14.5	 16
588	  9	95.3	13.4	 16
589	  9	108.5	13.7	 16
590	  9	106.0	22.6	 16
591	  9	168.3	24.0	 16
592	  9	70.5	8.4	 16
593	  9	116.3	14.7	 16
594	  9	112.5	19.3	 16
595	  9	172.0	30.7	 16
596	  9	833.8	102.0	 16
597	  9	824.5	113.6	 16
598	  9	285.8	43.1	 16
599	  9	130.0	14.7	 16
600	  9	148.5	24.0	 16
601	  9	125.8	22.7	 16
602	  9	111.8	16.0	 16
603	  9	327.5	89.5	 16
604	  9	143.8	29.0	 16
605	  9	81.3	16.2	 16
606	  9	297.8	33.4	 16
607	  9	76.3	10.0	 16
608	  9	75.8	10.9	 16
609	  9	96.8	14.7	 16
610	  9	109.3	14.4	 16
611	  9	96.3	14.4	 16
612	  9	149.8	21.2	 16
613	  9	637.5	108.5	 16
614	  9	100.8	17.3	 16
615	  9	102.5	12.5	 16
616	  9	114.5	16.6	 16
617	  9	454.0	53.6	 16
618	  9	133.3	21.4	 16
619	  9	78.5	9.6	 16
620	  9	153.5	22.4	 16
621	  9	110.3	18.1	 16
622	  9	94.3	14.0	 16
623	  9	138.3	17.0	 16
624	  9	171.8	35.5	 16
625	  9	90.8	14.9	 16
626	  9	75.8	10.5	 16
627	  9	151.0	20.9	 16
628	  9	100.3	12.6	 16
629	  9	96.0	12.6	 16
630	  9	237.5	28.7	 16
631	  9	155.3	18.4	 16
632	  9	710.5	99.3	 16
633	  9	115.3	20.5	 16
634	  9	456.3	59.5	 16
635	  9	1222.8	188.1	 16
636	  9	253.5	46.2	 16
637	  9	75.8	10.1	 16
638	  9	74.3	9.6	 16
639	  9	76.5	12.2	 16
640	  9	76.0	13.2	 16
641	  9	419.0	59.0	 16
642	  9	86.3	15.6	 16
643	  9	82.0	13.1	 16
644	  9	105.3	14.8	 16
645	  9	75.8	14.1	 16
646	  9	181.5	25.0	 16
647	  9	108.3	16.8	 16
648	  9	478.8	58.5	 16
649	  9	73.3	12.5	 16
650	  9	73.8	14.1	 16
651	  9	74.3	11.8	 16
652	  9	134.3	25.9	 16
653	  9	296.5	50.3	 16
654	  9	167.3	32.5	 16
655	  9	155.0	20.0	 16
656	  9	81.0	13.3	 16
657	  9	211.8	24.0	 16
658	  9	128.8	16.4	 16
659	  9	121.3	18.8	 16
660	  9	126.3	21.5	 16
661	  9	97.3	12.9	 16
662	  9	73.0	9.9	 16
663	  9	194.0	26.5	 16
664	  9	86.3	10.0	 16
665	  9	89.0	11.1	 16
666	  9	102.5	15.9	 16
667	  9	269.8	28.0	 16
668	  9	248.3	22.8	 16
669	  9	186.3	25.2	 16
670	  9	95.3	12.2	 16
671	  9	281.8	28.6	 16
672	  9	227.0	32.3	 16
673	  9	132.5	19.8	 16
674	  9	129.3	20.4	 16
675	  9	81.5	13.9	 16
676	  9	84.5	16.0	 16
677	  9	121.0	15.9	 16
678	  9	105.3	13.2	 16
679	  9	108.8	16.8	 16
680	  9	395.5	81.8	 16
681	  9	3586.0	347.0	 16
682	  9	3878.0	216.6	 16
683	  9	3669.3	289.3	 16
684	  9	3237.8	297.9	 16
685	  9	198.0	17.6	 16
686	  9	160.3	25.8	 16
687	  9	75.0	10.5	 16
688	  9	70.0	10.7	 16
689	  9	77.5	16.0	 16
690	  9	83.3	15.4	 16
691	  9	151.5	20.2	 16
692	  9	81.5	11.7	 16
693	  9	125.0	22.1	 16
694	  9	127.0	16.2	 16
695	  9	87.5	13.7	 16
696	  9	95.0	10.2	 16
697	  9	147.3	21.7	 16
698	  9	459.8	48.1	 16
699	  9	181.0	31.3	 16
700	  9	217.8	16.0	 16
701	  9	80.0	13.1	 16
702	  9	74.8	12.8	 16
703	  9	90.5	16.6	 16
704	  9	74.0	12.6	 16
705	  9	112.0	14.2	 16
706	  9	106.3	20.3	 16
707	  9	135.3	25.2	 16
708	  9	304.8	33.8	 16
709	  9	294.0	26.4	 16
710	  9	394.3	44.9	 16
711	  9	102.5	13.6	 16
  0	 10	4925.0	884.3	 16
  1	 10	93.5	15.1	 16
  2	 10	85.3	14.7	 16
  3	 10	80.5	17.2	 16
  4	 10	81.5	10.4	 16
  5	 10	83.0	13.3	 16
  6	 10	138.3	20.8	 16
  7	 10	72.5	10.3	 16
  8	 10	86.5	19.9	 16
  9	 10	94.0	16.9	 16
 10	 10	109.0	16.1	 16
 11	 10	67.5	9.5	 16
 12	 10	6791.3	1227.1	 16
 13	 10	165.0	22.0	 16
 14	 10	231.8	29.2	 16
 15	 10	215.8	28.0	 16
 16	 10	8691.8	1421.3	 16
 17	 10	115.8	23.9	 16
 18	 10	8012.3	1077.1	 16
 19	 10	153.8	31.2	 16
 20	 10	144.3	32.2	 16
 21	 10	140.8	24.0	 16
 22	 10	123.3	18.9	 16
 23	 10	91.5	15.2	 16
 24	 10	6788.0	695.0	 16
 25	 10	129.3	19.9	 20
 26	 10	118.3	13.6	 16
 27	 10	152.3	23.6	 16
 28	 10	8999.3	1623.9	 16
 29	 10	104.5	16.8	 16
 30	 10	7802.5	1541.8	 16
 31	 10	139.0	25.8	 16
 32	 10	135.3	18.1	 16
 33	 10	124.8	18.7	 16
 34	 10	115.0	20.1	 16
 35	 10	91.8	20.4	 16
 36	 10	6397.8	1595.6	 16
 37	 10	124.5	15.9	 16
 38	 10	124.0	17.3	 16
 39	 10	137.8	24.2	 16
 40	 10	7749.3	1618.9	 16
 41	 10	98.5	12.6	 16
 42	 10	6853.0	1515.1	 16
 43	 10	141.0	24.1	 16
 44	 10	116.0	12.6	 16
 45	 10	136.3	23.1	 16
 46	 10	7769.0	1628.1	 16
 47	 10	83.0	13.5	 16
 48	 10	114.5	18.8	 16
 49	 10	121.3	14.8	 16
 50	 10	6385.0	1257.3	 16
 51	 10	111.0	14.0	 16
 52	 10	129.3	28.4	 16
 53	 10	89.8	25.6	 16
 54	 10	7753.0	1637.8	 16
 55	 10	131.5	23.0	 16
 56	 10	117.3	21.0	 16
 57	 10	100.3	19.5	 16
 58	 10	105.5	15.8	 16
 59	 10	71.3	7.7	 16
 60	 10	75.8	28.2	 16
 61	 10	91.5	22.0	 16
 62	 10	7248.8	1421.3	 16
 63	 10	131.3	23.9	 16
 64	 10	117.3	18.7	 16
 65	 10	122.0	12.8	 16
 66	 10	8807.0	1263.8	 16
 67	 10	96.0	14.6	 16
 68	 10	6664.3	1092.7	 16
 69	 10	131.5	13.2	 16
 70	 10	110.5	13.1	 16
 71	 10	133.0	17.4	 16
 72	 10	7175.5	1586.5	 16
 73	 10	81.5	14.6	 16
 74	 10	106.8	11.6	 16
 75	 10	101.0	16.0	 16
 76	 10	127.0	28.7	 16
 77	 10	118.3	15.8	 16
 78	 10	122.8	19.7	 16
 79	 10	80.3	11.8	 16
 80	 10	6459.0	796.1	 16
 81	 10	118.5	19.2	 16
 82	 10	116.0	12.3	 16
 83	 10	119.8	16.2	 16
 84	 10	7188.0	1483.8	 16
 85	 10	100.3	14.6	 16
 86	 10	127.8	14.8	 16
 87	 10	141.3	18.5	 16
 88	 10	6800.8	576.3	 16
 89	 10	120.3	13.8	 16
 90	 10	101.8	13.3	 16
 91	 10	85.0	10.5	 16
 92	 10	6685.5	740.0	 16
 93	 10	120.0	16.4	 16
 94	 10	122.3	17.9	 16
 95	 10	6901.8	627.6	 16
 96	 10	112.3	13.7	 16
 97	 10	76.0	14.7	 16
 98	 10	6381.3	1171.6	 16
 99	 10	117.3	18.6	 16
100	 10	114.8	18.8	 16
101	 10	6795.0	959.7	 16
102	 10	124.5	19.5	 16
103	 10	82.8	13.1	 16
104	 10	6778.0	779.4	 16
105	 10	121.5	16.8	 16
106	 10	97.8	16.3	 16
107	 10	120.0	20.5	 16
108	 10	8598.3	710.0	 16
109	 10	87.5	14.7	 16
110	 10	83.3	15.5	 16
111	 10	153.5	18.5	 16
112	 10	400.3	41.5	 16
113	 10	173.8	22.1	 16
114	 10	270.5	25.2	 16
115	 10	105.5	24.9	 16
116	 10	97.8	18.6	 16
117	 10	86.0	14.6	 16
118	 10	107.5	15.3	 16
119	 10	101.3	14.0	 16
120	 10	98.5	13.4	 16
121	 10	102.3	16.2	 16
122	 10	85.0	14.3	 16
123	 10	81.3	10.3	 16
124	 10	114.8	22.5	 16
125	 10	65.3	11.0	 16
126	 10	92.8	9.5	 16
127	 10	95.0	12.3	 16
128	 10	77.8	11.4	 16
129	 10	76.0	13.5	 16
130	 10	105.0	20.9	 16
131	 10	105.0	16.8	 16
132	 10	109.3	17.8	 16
133	 10	97.0	17.8	 16
134	 10	103.8	35.6	 16
135	 10	72.0	11.6	 16
136	 10	62.3	6.7	 16
137	 10	86.5	13.8	 16
138	 10	77.5	10.9	 16
139	 10	86.0	12.1	 16
140	 10	69.5	13.3	 16
141	 10	86.5	13.2	 16
142	 10	93.3	15.7	 16
143	 10	277.3	40.6	 16
144	 10	168.3	22.7	 16
145	 10	84.5	15.7	 16
146	 10	90.3	23.2	 16
147	 10	78.0	10.7	 16
148	 10	97.3	13.5	 16
149	 10	83.5	16.8	 16
150	 10	106.0	20.0	 16
151	 10	78.3	12.1	 16
152	 10	538.3	95.4	 16
153	 10	90.8	13.0	 16
154	 10	247.8	23.4	 16
155	 10	285.3	44.8	 16
156	 10	113.8	21.3	 16
157	 10	361.8	56.0	 16
158	 10	131.8	35.1	 16
159	 10	223.8	27.2	 16
160	 10	621.0	105.9	 16
161	 10	72.8	13.9	 16
162	 10	69.8	10.9	 16
163	 10	102.3	20.3	 16
164	 10	106.0	13.7	 16
165	 10	198.8	30.7	 16
166	 10	84.3	12.7	 16
167	 10	98.3	16.2	 20
168	 10	129.8	18.3	 16
169	 10	700.8	103.3	 16
170	 10	613.3	81.1	 16
171	 10	84.3	13.8	 16
172	 10	124.0	19.5	 16
173	 10	87.5	15.7	 16
174	 10	121.0	18.5	 16
175	 10	185.3	32.9	 16
176	 10	94.0	10.5	 16
177	 10	81.3	11.3	 16
178	 10	70.5	12.5	 16
179	 10	81.3	10.8	 16
180	 10	92.0	17.4	 16
181	 10	92.0	16.7	 16
182	 10	86.0	10.2	 16
183	 10	90.0	12.4	 16
184	 10	99.0	16.4	 16
185	 10	82.0	10.9	 16
186	 10	105.8	72.0	 16
187	 10	78.3	11.2	 16
188	 10	86.5	10.2	 16
189	 10	101.8	15.4	 16
190	 10	112.0	17.9	 16
191	 10	224.0	24.9	 16
192	 10	126.3	22.8	 16
193	 10	80.8	9.3	 16
194	 10	66.5	11.8	 16
195	 10	84.5	12.5	 16
196	 10	77.5	12.5	 16
197	 10	74.5	12.2	 16
198	 10	91.3	14.4	 16
199	 10	129.3	13.4	 16
200	 10	84.3	15.3	 16
201	 10	426.8	91.8	 16
202	 10	81.0	13.7	 16
203	 10	84.3	14.1	 16
204	 10	97.0	33.6	 16
205	 10	132.8	38.7	 16
206	 10	214.3	26.9	 16
207	 10	84.3	12.9	 16
208	 10	124.5	21.5	 16
209	 10	70.8	17.7	 16
210	 10	170.3	27.9	 16
211	 10	98.8	15.5	 16
212	 10	268.3	32.3	 16
213	 10	169.0	24.5	 16
214	 10	206.3	29.2	 16
215	 10	112.0	23.5	 16
216	 10	84.8	15.9	 16
217	 10	132.3	24.9	 16
218	 10	115.3	93.2	 16
219	 10	67.0	10.8	 16
220	 10	141.0	19.5	 16
221	 10	195.3	25.5	 16
222	 10	108.0	16.8	 16
223	 10	166.0	51.3	 16
224	 10	146.0	15.0	 16
225	 10	90.3	11.7	 16
226	 10	91.3	13.6	 16
227	 10	83.8	16.3	 16
228	 10	73.0	9.4	 16
229	 10	136.5	26.0	 16
230	 10	110.5	19.0	 16
231	 10	144.5	22.5	 16
232	 10	123.3	16.1	 16
233	 10	162.8	22.2	 16
234	 10	87.3	14.2	 16
235	 10	146.3	22.0	 16
236	 10	106.8	14.5	 16
237	 10	90.8	16.9	 16
238	 10	114.0	17.9	 16
239	 10	133.0	14.4	 16
240	 10	113.5	18.9	 16
241	 10	120.8	31.2	 16
242	 10	76.3	6.7	 16
243	 10	94.8	28.4	 16
244	 10	96.5	10.7	 16
245	 10	172.0	18.0	 16
246	 10	73.3	10.6	 16
247	 10	480.5	76.3	 16
248	 10	107.5	13.2	 16
249	 10	91.5	15.3	 16
250	 10	89.0	11.0	 16
251	 10	124.5	16.0	 16
252	 10	96.8	14.6	 16
253	 10	251.0	21.6	 16
254	 10	106.5	19.7	 16
255	 10	71.5	12.4	 16
256	 10	125.8	22.4	 16
257	 10	89.3	11.5	 16
258	 10	235.8	25.6	 16
259	 10	106.0	17.6	 16
260	 10	151.0	17.9	 16
261	 10	139.3	20.6	 16
262	 10	99.0	18.9	 16
263	 10	76.3	14.5	 16
264	 10	71.5	10.3	 16
265	 10	71.0	10.2	 16
266	 10	153.0	14.2	 16
267	 10	156.8	17.9	 16
268	 10	102.3	12.6	 16
269	 10	244.5	27.0	 16
270	 10	77.5	12.7	 16
271	 10	75.3	10.8	 16
272	 10	71.5	15.3	 16
273	 10	78.5	13.1	 16
274	 10	93.5	22.3	 16
275	 10	83.3	15.6	 16
276	 10	73.8	12.7	 16
277	 10	94.3	21.0	 16
278	 10	82.5	10.6	 16
279	 10	128.0	22.1	 16
280	 10	85.3	16.6	 16
281	 10	93.8	16.5	 16
282	 10	153.8	19.9	 16
283	 10	68.0	10.9	 16
284	 10	73.3	11.2	 16
285	 10	82.8	14.4	 16
286	 10	76.0	9.8	 16
287	 10	88.0	15.5	 16
288	 10	98.8	17.0	 16
289	 10	108.3	12.4	 16
290	 10	150.5	21.4	 16
291	 10	169.0	19.5	 16
292	 10	242.0	32.3	 16
293	 10	117.8	20.7	 16
294	 10	1539.5	111.3	 16
295	 10	563.0	35.1	 16
296	 10	121.3	20.0	 16
297	 10	512.3	46.5	 16
298	 10	147.5	23.8	 16
299	 10	92.5	12.4	 16
300	 10	94.8	15.1	 16
301	 10	97.8	15.6	 16
302	 10	84.3	13.4	 16
303	 10	80.8	18.7	 16
304	 10	154.8	19.9	 16
305	 10	350.0	34.8	 16
306	 10	92.0	9.5	 16
307	 10	155.3	17.8	 16
308	 10	130.0	20.5	 16
309	 10	118.0	20.6	 16
310	 10	158.8	19.6	 20
311	 10	138.0	24.5	 16
312	 10	105.8	29.7	 16
313	 10	108.8	19.8	 16
314	 10	106.3	18.5	 16
315	 10	93.8	14.7	 16
316	 10	213.0	42.3	 16
317	 10	970.0	178.6	 16
318	 10	78.3	13.7	 16
319	 10	77.0	29.7	 16
320	 10	112.5	15.0	 16
321	 10	122.0	23.5	 16
322	 10	256.0	30.1	 16
323	 10	73.5	11.9	 16
324	 10	161.3	22.2	 16
325	 10	93.0	11.5	 16
326	 10	75.5	7.2	 16
327	 10	93.3	16.1	 16
328	 10	201.3	28.0	 16
329	 10	109.0	15.0	 16
330	 10	104.3	16.1	 16
331	 10	84.8	14.0	 16
332	 10	319.8	34.4	 16
333	 10	236.0	30.8	 16
334	 10	129.5	17.3	 16
335	 10	70.8	11.3	 16
336	 10	77.5	15.7	 16
337	 10	102.8	22.7	 16
338	 10	106.8	21.4	 16
339	 10	141.5	17.7	 16
340	 10	121.3	14.9	 16
341	 10	81.0	13.0	 16
342	 10	141.5	16.4	 16
343	 10	86.5	15.0	 16
344	 10	303.8	32.5	 16
345	 10	77.8	12.7	 16
346	 10	279.3	32.6	 16
347	 10	96.5	19.2	 16
348	 10	604.3	56.9	 16
349	 10	102.8	17.1	 16
350	 10	246.0	52.0	 16
351	 10	103.0	18.5	 16
352	 10	131.5	14.5	 16
353	 10	80.8	9.8	 16
354	 10	96.8	21.0	 16
355	 10	172.8	33.3	 16
356	 10	206.0	28.9	 16
357	 10	114.3	14.0	 16
358	 10	100.3	16.6	 16
359	 10	152.5	22.7	 16
360	 10	84.5	13.3	 16
361	 10	133.0	17.6	 16
362	 10	80.3	8.9	 16
363	 10	101.5	14.8	 16
364	 10	71.8	9.8	 16
365	 10	85.3	11.7	 16
366	 10	66.8	9.7	 16
367	 10	63.3	11.4	 16
368	 10	83.3	10.7	 16
369	 10	104.5	29.5	 16
370	 10	121.8	21.4	 16
371	 10	97.5	11.6	 16
372	 10	81.5	12.2	 16
373	 10	84.3	17.6	 16
374	 10	71.0	10.9	 16
375	 10	97.5	12.4	 16
376	 10	112.3	22.9	 16
377	 10	299.3	40.4	 16
378	 10	366.0	49.9	 16
379	 10	107.5	15.6	 16
380	 10	77.8	11.1	 16
381	 10	76.3	12.1	 16
382	 10	93.5	11.6	 16
383	 10	178.0	22.3	 16
384	 10	186.0	25.6	 16
385	 10	107.8	13.7	 16
386	 10	213.8	32.8	 16
387	 10	173.3	20.3	 16
388	 10	75.0	9.0	 16
389	 10	89.5	17.4	 16
390	 10	91.5	12.3	 16
391	 10	99.0	14.4	 16
392	 10	118.3	17.3	 16
393	 10	76.5	10.2	 16
394	 10	537.5	58.7	 16
395	 10	214.3	20.3	 16
396	 10	82.0	15.2	 16
397	 10	80.0	11.2	 16
398	 10	100.5	11.1	 16
399	 10	88.0	14.2	 16
400	 10	77.0	12.3	 16
401	 10	95.3	16.4	 16
402	 10	80.3	12.9	 16
403	 10	73.0	11.9	 16
404	 10	95.3	11.9	 16
405	 10	112.8	13.8	 16
406	 10	76.3	13.2	 16
407	 10	85.3	17.7	 16
408	 10	77.0	14.3	 16
409	 10	118.3	13.8	 16
410	 10	79.3	12.6	 16
411	 10	398.0	38.7	 16
412	 10	163.0	19.9	 16
413	 10	92.8	13.8	 16
414	 10	155.8	23.2	 16
415	 10	83.8	15.9	 16
416	 10	121.0	16.1	 16
417	 10	77.5	10.1	 16
418	 10	68.5	7.8	 16
419	 10	88.3	16.4	 16
420	 10	203.5	30.2	 16
421	 10	84.8	14.3	 16
422	 10	74.0	14.9	 16
423	 10	114.0	34.8	 16
424	 10	92.8	13.4	 16
425	 10	68.0	13.1	 16
426	 10	69.3	10.4	 16
427	 10	82.3	16.9	 16
428	 10	80.3	12.4	 16
429	 10	75.3	10.1	 16
430	 10	77.8	12.2	 16
431	 10	83.3	18.3	 16
432	 10	79.3	44.5	 16
433	 10	89.5	14.7	 16
434	 10	70.0	8.4	 16
435	 10	74.5	10.7	 16
436	 10	74.0	20.9	 16
437	 10	69.3	9.4	 16
438	 10	513.3	81.6	 16
439	 10	91.5	15.2	 16
440	 10	112.8	17.1	 16
441	 10	96.5	16.1	 16
442	 10	208.8	24.2	 16
443	 10	151.0	26.5	 16
444	 10	74.0	12.2	 16
445	 10	85.8	15.6	 16
446	 10	79.0	12.5	 16
447	 10	69.3	9.0	 16
448	 10	77.5	8.9	 16
449	 10	68.5	11.5	 16
450	 10	116.8	12.4	 16
451	 10	104.3	12.0	 16
452	 10	128.0	24.0	 20
453	 10	152.8	26.8	 16
454	 10	648.0	65.1	 16
455	 10	116.8	16.6	 16
456	 10	123.3	31.8	 16
457	 10	77.0	13.0	 16
458	 10	71.0	11.3	 16
459	 10	73.3	10.5	 16
460	 10	432.0	51.6	 16
461	 10	69.5	9.5	 16
462	 10	70.5	9.8	 16
463	 10	82.0	11.4	 16
464	 10	80.3	13.3	 16
465	 10	87.8	12.0	 16
466	 10	259.3	26.0	 16
467	 10	77.8	14.1	 16
468	 10	71.3	11.9	 16
469	 10	73.0	11.0	 16
470	 10	72.0	8.1	 16
471	 10	75.0	11.4	 16
472	 10	150.0	18.1	 16
473	 10	97.3	16.6	 16
474	 10	85.8	11.9	 16
475	 10	81.3	17.1	 16
476	 10	78.0	14.8	 16
477	 10	80.8	11.9	 16
478	 10	82.8	9.5	 16
479	 10	84.8	15.7	 16
480	 10	93.5	17.4	 16
481	 10	77.5	14.8	 16
482	 10	75.0	14.4	 16
483	 10	72.0	11.9	 16
484	 10	145.5	13.8	 16
485	 10	86.0	13.3	 16
486	 10	173.0	21.2	 16
487	 10	82.5	12.7	 16
488	 10	80.8	12.0	 16
489	 10	72.5	10.6	 16
490	 10	89.8	12.4	 16
491	 10	73.0	14.6	 16
492	 10	81.5	16.6	 16
493	 10	296.3	33.5	 16
494	 10	513.5	33.0	 16
495	 10	234.0	25.7	 16
496	 10	236.5	43.6	 16
497	 10	439.0	24.8	 16
498	 10	262.5	27.0	 16
499	 10	197.5	29.4	 16
500	 10	75.8	12.1	 16
501	 10	76.0	9.1	 16
502	 10	74.5	14.5	 16
503	 10	89.8	13.0	 16
504	 10	125.3	39.0	 16
505	 10	103.3	20.7	 16
506	 10	770.0	71.2	 16
507	 10	78.5	10.4	 16
508	 10	315.5	37.7	 16
509	 10	76.3	11.3	 16
510	 10	165.3	30.2	 16
511	 10	98.8	18.3	 16
512	 10	74.8	11.5	 16
513	 10	77.0	14.8	 16
514	 10	116.8	24.3	 16
515	 10	77.0	12.4	 16
516	 10	72.3	11.8	 16
517	 10	62.8	11.1	 16
518	 10	77.8	15.2	 16
519	 10	101.5	16.4	 16
520	 10	79.8	8.8	 16
521	 10	73.3	11.1	 16
522	 10	127.0	24.8	 16
523	 10	78.3	17.4	 16
524	 10	77.8	12.5	 16
525	 10	96.5	10.2	 16
526	 10	97.3	17.1	 16
527	 10	110.8	10.5	 16
528	 10	92.3	16.0	 16
529	 10	76.0	10.9	 16
530	 10	178.8	26.8	 16
531	 10	68.8	9.7	 16
532	 10	69.3	13.5	 16
533	 10	74.0	10.6	 16
534	 10	78.8	87.8	 16
535	 10	108.3	22.4	 16
536	 10	85.3	10.8	 16
537	 10	94.3	14.5	 16
538	 10	88.5	11.3	 16
539	 10	84.3	15.9	 16
540	 10	95.3	17.8	 16
541	 10	72.5	10.5	 16
542	 10	63.0	11.5	 16
543	 10	84.5	12.4	 16
544	 10	84.0	14.2	 16
545	 10	98.0	16.8	 16
546	 10	164.0	19.7	 16
547	 10	350.5	45.8	 16
548	 10	76.3	11.3	 16
549	 10	115.5	22.2	 16
550	 10	118.0	17.7	 16
551	 10	377.0	42.1	 16
552	 10	172.3	21.7	 16
553	 10	169.3	27.5	 16
554	 10	93.0	21.5	 16
555	 10	75.5	14.7	 16
556	 10	76.5	12.6	 16
557	 10	91.3	12.1	 16
558	 10	75.0	13.0	 16
559	 10	139.5	22.9	 16
560	 10	87.3	15.5	 16
561	 10	160.3	22.9	 16
562	 10	84.5	13.8	 16
563	 10	102.3	18.2	 16
564	 10	112.8	13.7	 16
565	 10	190.3	31.9	 16
566	 10	201.5	28.1	 16
567	 10	76.8	12.4	 16
568	 10	82.5	14.8	 16
569	 10	143.0	22.0	 16
570	 10	192.8	24.6	 16
571	 10	388.3	60.1	 16
572	 10	205.8	23.9	 16
573	 10	93.3	22.1	 16
574	 10	180.3	21.6	 16
575	 10	174.5	23.6	 16
576	 10	133.5	23.0	 16
577	 10	103.0	16.7	 16
578	 10	79.3	11.8	 16
579	 10	70.5	12.5	 16
580	 10	99.8	13.2	 16
581	 10	110.8	13.0	 16
582	 10	132.5	16.1	 16
583	 10	86.3	8.3	 16
584	 10	88.0	17.5	 16
585	 10	117.5	19.7	 16
586	 10	91.5	17.6	 16
587	 10	75.8	11.8	 16
588	 10	79.0	14.3	 16
589	 10	87.0	12.0	 16
590	 10	83.5	13.9	 16
591	 10	99.0	13.9	 16
592	 10	66.3	10.5	 16
593	 10	87.3	14.0	 16
594	 10	97.8	12.1	 16
595	 10	138.3	19.3	 20
596	 10	141.3	24.6	 16
597	 10	137.5	16.5	 16
598	 10	125.8	18.8	 16
599	 10	156.5	18.3	 16
600	 10	161.5	18.8	 16
601	 10	129.3	21.0	 16
602	 10	83.0	12.6	 16
603	 10	102.8	21.2	 16
604	 10	73.5	6.4	 16
605	 10	77.0	12.9	 16
606	 10	235.8	23.5	 16
607	 10	91.0	14.5	 16
608	 10	85.3	12.3	 16
609	 10	65.0	9.4	 16
610	 10	143.0	19.6	 16
611	 10	144.0	17.5	 16
612	 10	85.5	17.3	 16
613	 10	171.0	25.9	 16
614	 10	88.0	15.8	 16
615	 10	84.3	10.7	 16
616	 10	98.8	15.9	 16
617	 10	190.0	19.6	 16
618	 10	127.0	16.1	 16
619	 10	75.0	12.6	 16
620	 10	92.0	10.4	 16
621	 10	116.8	18.2	 16
622	 10	73.8	14.3	 16
623	 10	91.0	18.9	 16
624	 10	74.5	18.9	 16
625	 10	87.3	15.2	 16
626	 10	68.3	12.2	 16
627	 10	85.3	13.9	 16
628	 10	153.0	26.4	 16
629	 10	80.3	16.9	 16
630	 10	154.0	23.6	 16
631	 10	280.3	31.7	 16
632	 10	132.3	22.3	 16
633	 10	94.3	19.4	 16
634	 10	494.5	54.2	 16
635	 10	181.3	27.6	 16
636	 10	110.5	14.9	 16
637	 10	77.8	9.3	 16
638	 10	69.3	12.6	 16
639	 10	62.8	12.6	 16
640	 10	76.5	10.6	 16
641	 10	494.5	40.7	 16
642	 10	66.5	10.1	 16
643	 10	77.3	17.9	 16
644	 10	146.8	19.2	 16
645	 10	65.3	10.8	 16
646	 10	95.5	15.4	 16
647	 10	131.3	16.7	 16
648	 10	161.0	21.5	 16
649	 10	75.8	13.6	 16
650	 10	72.3	12.2	 16
651	 10	66.3	10.2	 16
652	 10	91.3	15.8	 16
653	 10	171.3	26.3	 16
654	 10	104.8	13.2	 16
655	 10	95.5	16.6	 16
656	 10	80.0	11.1	 16
657	 10	77.5	14.5	 16
658	 10	283.0	35.3	 16
659	 10	68.3	12.7	 16
660	 10	82.0	16.2	 16
661	 10	79.5	15.7	 16
662	 10	73.8	12.2	 16
663	 10	185.3	20.5	 16
664	 10	76.3	16.3	 16
665	 10	88.0	15.4	 16
666	 10	75.0	12.7	 16
667	 10	285.5	21.9	 16
668	 10	160.8	26.9	 16
669	 10	147.3	25.4	 16
670	 10	188.0	26.8	 16
671	 10	103.3	18.8	 16
672	 10	149.5	24.1	 16
673	 10	117.0	17.4	 16
674	 10	91.3	14.9	 16
675	 10	85.3	11.8	 16
676	 10	115.5	17.3	 16
677	 10	149.8	17.2	 16
678	 10	73.0	10.8	 16
679	 10	77.0	14.0	 16
680	 10	336.5	34.5	 16
681	 10	795.8	136.3	 16
682	 10	874.8	84.5	 16
683	 10	837.0	79.2	 16
684	 10	696.5	73.5	 16
685	 10	125.8	14.9	 16
686	 10	96.5	16.5	 16
687	 10	100.3	14.9	 16
688	 10	71.3	11.2	 16
689	 10	80.8	22.0	 16
690	 10	65.8	9.0	 16
691	 10	164.3	17.7	 16
692	 10	77.0	18.5	 16
693	 10	74.5	11.7	 16
694	 10	82.8	15.5	 16
695	 10	76.3	10.1	 16
696	 10	83.5	12.5	 16
697	 10	96.0	13.5	 16
698	 10	125.8	13.6	 16
699	 10	123.0	14.5	 16
700	 10	106.8	15.6	 16
701	 10	81.0	11.7	 16
702	 10	67.8	10.3	 16
703	 10	68.5	8.1	 16
704	 10	67.3	11.9	 16
705	 10	100.0	11.4	 16
706	 10	75.3	13.2	 16
707	 10	129.8	20.5	 16
708	 10	267.3	27.1	 16
709	 10	355.3	46.1	 16
710	 10	123.3	17.5	 16
711	 10	6449.3	701.4	 16
  0	 11	116.5	23.5	 16
  1	 11	95.8	17.4	 16
  2	 11	82.0	16.8	 16
  3	 11	99.3	20.7	 16
  4	 11	81.3	11.9	 16
  5	 11	301.8	53.8	 16
  6	 11	75.5	10.2	 16
  7	 11	248.0	28.8	 16
  8	 11	147.5	21.5	 16
  9	 11	82.0	8.1	 16
 10	 11	94.5	13.7	 16
 11	 11	74.5	10.9	 16
 12	 11	101.3	13.6	 16
 13	 11	7257.0	1213.0	 16
 14	 11	7946.8	786.8	 16
 15	 11	8417.5	683.3	 16
 16	 11	177.5	61.2	 16
 17	 11	66.0	10.8	 16
 18	 11	117.0	15.7	 16
 19	 11	7291.3	1946.4	 16
 20	 11	7655.3	1841.8	 16
 21	 11	7890.5	1706.4	 16
 22	 11	119.5	33.1	 16
 23	 11	78.8	10.5	 16
 24	 11	6719.8	1125.4	 16
 25	 11	143.0	50.3	 16
 26	 11	99.5	20.4	 16
 27	 11	120.5	16.1	 16
 28	 11	8773.3	1111.9	 16
 29	 11	86.5	18.9	 16
 30	 11	114.3	11.3	 16
 31	 11	7791.0	879.7	 16
 32	 11	7854.8	1936.6	 16
 33	 11	7717.0	1767.9	 16
 34	 11	130.8	24.0	 20
 35	 11	90.3	18.0	 16
 36	 11	130.8	28.5	 16
 37	 11	7130.3	914.6	 16
 38	 11	7643.0	846.4	 16
 39	 11	7872.0	1862.4	 16
 40	 11	121.0	23.4	 16
 41	 11	100.3	17.9	 16
 42	 11	6771.0	1642.3	 16
 43	 11	121.3	17.7	 16
 44	 11	110.0	17.0	 16
 45	 11	120.3	26.7	 16
 46	 11	7618.0	2267.7	 16
 47	 11	78.0	13.7	 16
 48	 11	106.5	12.8	 16
 49	 11	113.8	23.3	 16
 50	 11	6614.0	1572.4	 16
 51	 11	109.3	21.3	 16
 52	 11	100.3	16.8	 16
 53	 11	88.5	26.1	 16
 54	 11	7059.0	1607.3	 16
 55	 11	104.5	14.8	 16
 56	 11	95.0	10.6	 16
 57	 11	98.0	12.1	 16
 58	 11	95.0	16.2	 16
 59	 11	64.8	12.4	 16
 60	 11	61.0	9.9	 16
 61	 11	74.3	15.6	 16
 62	 11	6906.0	1502.5	 16
 63	 11	99.5	17.7	 16
 64	 11	99.3	12.0	 16
 65	 11	113.8	21.4	 16
 66	 11	8631.5	1503.4	 16
 67	 11	76.5	11.7	 16
 68	 11	129.0	20.1	 16
 69	 11	7205.3	613.1	 16
 70	 11	7848.5	1931.5	 16
 71	 11	7710.8	1918.8	 16
 72	 11	110.3	21.0	 16
 73	 11	63.3	12.3	 16
 74	 11	94.3	16.1	 16
 75	 11	101.0	16.4	 16
 76	 11	106.5	15.1	 16
 77	 11	106.5	18.1	 16
 78	 11	95.3	17.7	 16
 79	 11	73.3	8.6	 16
 80	 11	113.3	19.4	 16
 81	 11	7194.8	708.6	 16
 82	 11	7683.5	662.6	 16
 83	 11	7883.0	1789.8	 16
 84	 11	122.5	16.8	 16
 85	 11	69.0	9.9	 16
 86	 11	124.5	21.2	 16
 87	 11	7446.8	866.0	 16
 88	 11	7914.3	848.6	 16
 89	 11	7280.5	1043.0	 16
 90	 11	110.8	11.9	 16
 91	 11	75.3	10.9	 16
 92	 11	119.8	21.1	 16
 93	 11	7125.5	455.6	 16
 94	 11	7097.8	778.9	 16
 95	 11	117.0	21.1	 16
 96	 11	113.5	14.8	 16
 97	 11	71.3	13.4	 16
 98	 11	103.3	16.7	 16
 99	 11	7119.3	858.7	 16
100	 11	7252.0	985.2	 16
101	 11	112.3	19.6	 16
102	 11	104.8	18.3	 16
103	 11	105.3	27.5	 16
104	 11	6548.8	766.7	 16
105	 11	159.5	32.9	 16
106	 11	101.0	16.4	 16
107	 11	99.0	13.7	 16
108	 11	8541.0	1704.3	 16
109	 11	82.8	13.7	 16
110	 11	67.5	9.1	 16
111	 11	87.5	10.8	 16
112	 11	602.5	129.2	 16
113	 11	120.3	20.0	 16
114	 11	153.0	20.8	 16
115	 11	197.5	20.0	 16
116	 11	160.5	20.8	 16
117	 11	89.5	16.6	 16
118	 11	83.3	17.8	 16
119	 11	147.8	17.9	 16
120	 11	141.3	20.0	 16
121	 11	168.0	17.1	 16
122	 11	265.3	27.0	 16
123	 11	482.3	46.4	 16
124	 11	205.0	38.8	 16
125	 11	99.5	12.6	 16
126	 11	102.3	14.8	 16
127	 11	247.3	36.9	 16
128	 11	78.5	14.2	 16
129	 11	124.8	23.9	 16
130	 11	1934.8	303.2	 16
131	 11	102.8	14.6	 16
132	 11	139.0	19.8	 16
133	 11	86.0	10.3	 16
134	 11	130.5	17.9	 16
135	 11	195.3	27.4	 16
136	 11	70.0	11.5	 16
137	 11	65.8	8.6	 16
138	 11	79.3	15.4	 16
139	 11	115.8	22.1	 16
140	 11	68.5	14.2	 16
141	 11	110.0	18.9	 16
142	 11	781.3	93.6	 16
143	 11	614.3	69.3	 16
144	 11	83.0	18.9	 16
145	 11	75.0	13.7	 16
146	 11	207.0	33.5	 16
147	 11	81.3	17.4	 16
148	 11	87.5	14.7	 16
149	 11	126.5	20.2	 16
150	 11	105.0	24.9	 16
151	 11	116.5	17.8	 16
152	 11	125.3	21.1	 16
153	 11	1866.8	307.2	 16
154	 11	1932.8	237.1	 16
155	 11	453.5	77.4	 16
156	 11	81.5	9.2	 16
157	 11	334.3	75.3	 16
158	 11	635.0	77.5	 16
159	 11	226.5	24.5	 16
160	 11	79.0	14.7	 16
161	 11	344.5	48.8	 16
162	 11	94.8	14.5	 16
163	 11	110.3	24.8	 16
164	 11	71.5	11.7	 16
165	 11	86.3	11.7	 16
166	 11	389.8	55.7	 16
167	 11	81.3	11.7	 16
168	 11	86.0	14.7	 16
169	 11	77.5	11.1	 16
170	 11	276.0	44.3	 16
171	 11	91.3	14.0	 16
172	 11	114.5	22.1	 16
173	 11	137.5	14.6	 16
174	 11	154.8	20.5	 16
175	 11	224.3	24.0	 16
176	 11	139.0	20.6	 20
177	 11	111.3	14.8	 16
178	 11	243.0	30.1	 16
179	 11	118.0	23.0	 16
180	 11	82.5	16.6	 16
181	 11	662.3	138.3	 16
182	 11	145.3	22.6	 16
183	 11	74.5	9.2	 16
184	 11	100.3	13.7	 16
185	 11	98.0	22.2	 16
186	 11	90.3	17.1	 16
187	 11	288.5	29.4	 16
188	 11	191.5	25.8	 16
189	 11	248.8	27.8	 16
190	 11	146.8	22.5	 16
191	 11	106.3	13.5	 16
192	 11	134.8	22.9	 16
193	 11	75.5	16.9	 16
194	 11	87.5	13.7	 16
195	 11	86.0	13.5	 16
196	 11	231.0	21.2	 16
197	 11	103.5	13.5	 16
198	 11	170.3	27.6	 16
199	 11	224.0	41.1	 16
200	 11	77.3	13.6	 16
201	 11	86.5	15.6	 16
202	 11	817.5	140.8	 16
203	 11	87.5	13.1	 16
204	 11	78.8	13.7	 16
205	 11	80.3	12.2	 16
206	 11	64.3	11.4	 16
207	 11	84.5	15.7	 16
208	 11	244.0	26.1	 16
209	 11	174.5	29.4	 16
210	 11	117.5	23.3	 16
211	 11	79.0	11.7	 16
212	 11	97.8	14.4	 16
213	 11	227.0	21.1	 16
214	 11	194.3	34.4	 16
215	 11	572.3	54.3	 16
216	 11	217.5	23.6	 16
217	 11	102.3	15.9	 16
218	 11	147.8	23.4	 16
219	 11	128.0	17.1	 16
220	 11	85.5	11.9	 16
221	 11	286.8	30.5	 16
222	 11	756.5	125.4	 16
223	 11	117.5	24.3	 16
224	 11	101.5	22.7	 16
225	 11	248.5	25.0	 16
226	 11	173.5	34.0	 16
227	 11	76.5	12.2	 16
228	 11	97.0	19.1	 16
229	 11	196.3	17.6	 16
230	 11	178.8	19.4	 16
231	 11	260.0	24.0	 16
232	 11	195.8	32.2	 16
233	 11	107.8	15.6	 16
234	 11	118.0	32.5	 16
235	 11	160.8	24.5	 16
236	 11	246.8	30.8	 16
237	 11	100.5	11.4	 16
238	 11	108.3	23.3	 16
239	 11	127.0	23.6	 16
240	 11	937.3	112.4	 16
241	 11	170.3	30.2	 16
242	 11	341.8	53.1	 16
243	 11	88.3	13.9	 16
244	 11	90.8	16.4	 16
245	 11	150.0	24.8	 16
246	 11	82.0	13.8	 16
247	 11	78.5	12.3	 16
248	 11	577.8	67.0	 16
249	 11	147.8	31.6	 16
250	 11	270.8	22.9	 16
251	 11	117.0	19.8	 16
252	 11	91.0	15.2	 16
253	 11	103.5	27.8	 16
254	 11	93.5	19.6	 16
255	 11	71.3	10.6	 16
256	 11	76.0	13.5	 16
257	 11	79.0	10.5	 16
258	 11	205.5	28.6	 16
259	 11	145.0	16.1	 16
260	 11	98.3	13.5	 16
261	 11	59.8	11.7	 16
262	 11	80.0	9.8	 16
263	 11	138.3	18.2	 16
264	 11	82.0	14.1	 16
265	 11	90.5	13.8	 16
266	 11	215.5	27.8	 16
267	 11	171.5	29.7	 16
268	 11	147.5	15.3	 16
269	 11	114.3	17.6	 16
270	 11	146.0	22.4	 16
271	 11	292.3	24.8	 16
272	 11	92.8	17.6	 16
273	 11	91.5	17.2	 16
274	 11	216.5	27.6	 16
275	 11	134.3	24.6	 16
276	 11	126.3	21.7	 16
277	 11	159.5	21.6	 16
278	 11	372.8	36.8	 16
279	 11	304.0	38.5	 16
280	 11	161.5	27.3	 16
281	 11	103.0	16.0	 16
282	 11	142.3	12.4	 16
283	 11	166.3	28.4	 16
284	 11	84.8	12.5	 16
285	 11	92.3	15.2	 16
286	 11	213.8	45.2	 16
287	 11	234.5	36.1	 16
288	 11	1169.8	131.7	 16
289	 11	246.3	20.3	 16
290	 11	82.3	10.0	 16
291	 11	89.0	15.5	 16
292	 11	219.5	25.7	 16
293	 11	241.3	31.9	 16
294	 11	175.5	27.3	 16
295	 11	272.3	18.2	 16
296	 11	367.8	39.8	 16
297	 11	728.5	82.5	 16
298	 11	88.3	17.0	 16
299	 11	165.5	25.7	 16
300	 11	200.5	36.4	 16
301	 11	90.3	10.2	 16
302	 11	104.3	13.1	 16
303	 11	126.3	16.0	 16
304	 11	143.3	13.8	 16
305	 11	358.0	32.3	 16
306	 11	136.3	14.7	 16
307	 11	130.0	13.1	 16
308	 11	209.5	35.3	 16
309	 11	313.8	33.4	 16
310	 11	76.8	17.6	 16
311	 11	116.0	15.3	 16
312	 11	88.8	14.5	 16
313	 11	214.8	22.9	 16
314	 11	257.3	39.9	 16
315	 11	74.0	12.0	 16
316	 11	71.0	13.4	 16
317	 11	84.0	13.8	 16
318	 11	98.8	1651.6	 16
319	 11	80.0	12.5	 20
320	 11	147.5	35.6	 16
321	 11	95.5	18.5	 16
322	 11	81.5	19.4	 16
323	 11	664.3	54.2	 16
324	 11	150.0	20.2	 16
325	 11	136.3	25.4	 16
326	 11	209.8	47.2	 16
327	 11	100.0	16.0	 16
328	 11	90.0	10.9	 16
329	 11	98.8	16.7	 16
330	 11	732.3	125.8	 16
331	 11	94.3	17.6	 16
332	 11	73.8	11.3	 16
333	 11	115.3	16.3	 16
334	 11	76.3	10.7	 16
335	 11	131.5	18.9	 16
336	 11	71.5	9.7	 16
337	 11	111.3	21.2	 16
338	 11	77.5	14.1	 16
339	 11	131.3	19.9	 16
340	 11	137.0	18.6	 16
341	 11	167.5	26.9	 16
342	 11	261.0	34.1	 16
343	 11	82.0	15.3	 16
344	 11	160.0	20.1	 16
345	 11	91.8	13.0	 16
346	 11	68.5	7.5	 16
347	 11	83.3	31.5	 16
348	 11	80.5	11.6	 16
349	 11	68.3	15.4	 16
350	 11	254.5	45.7	 16
351	 11	86.5	13.8	 16
352	 11	100.5	17.2	 16
353	 11	101.0	17.0	 16
354	 11	157.3	20.3	 16
355	 11	345.5	42.5	 16
356	 11	369.8	61.1	 16
357	 11	334.8	40.3	 16
358	 11	243.8	28.7	 16
359	 11	78.0	12.8	 16
360	 11	98.5	16.5	 16
361	 11	272.5	37.9	 16
362	 11	95.5	16.4	 16
363	 11	102.3	12.4	 16
364	 11	112.5	16.5	 16
365	 11	78.8	9.9	 16
366	 11	76.3	14.7	 16
367	 11	85.0	12.4	 16
368	 11	140.3	23.2	 16
369	 11	101.5	20.2	 16
370	 11	144.3	24.3	 16
371	 11	223.0	27.5	 16
372	 11	131.5	23.9	 16
373	 11	123.3	17.8	 16
374	 11	118.8	19.1	 16
375	 11	241.3	41.7	 16
376	 11	103.3	16.1	 16
377	 11	103.5	24.7	 16
378	 11	232.3	26.0	 16
379	 11	81.3	11.3	 16
380	 11	78.0	10.5	 16
381	 11	123.3	22.2	 16
382	 11	87.0	12.7	 16
383	 11	157.0	20.2	 16
384	 11	81.0	12.4	 16
385	 11	108.0	18.1	 16
386	 11	117.0	19.1	 16
387	 11	108.5	17.9	 16
388	 11	69.0	11.8	 16
389	 11	79.8	14.8	 16
390	 11	126.0	17.9	 16
391	 11	85.3	16.9	 16
392	 11	76.8	11.1	 16
393	 11	132.0	23.6	 16
394	 11	113.5	13.7	 16
395	 11	97.5	13.6	 16
396	 11	208.8	24.5	 16
397	 11	767.0	86.6	 16
398	 11	250.0	37.3	 16
399	 11	181.0	39.1	 16
400	 11	113.0	15.6	 16
401	 11	181.0	27.5	 16
402	 11	77.5	11.2	 16
403	 11	121.3	25.0	 16
404	 11	77.3	10.7	 16
405	 11	81.5	17.5	 16
406	 11	178.3	23.2	 16
407	 11	79.0	16.4	 16
408	 11	83.0	15.1	 16
409	 11	98.3	15.1	 16
410	 11	128.3	15.1	 16
411	 11	96.8	15.2	 16
412	 11	106.0	15.2	 16
413	 11	94.3	14.9	 16
414	 11	76.0	10.0	 16
415	 11	432.8	47.8	 16
416	 11	152.0	20.2	 16
417	 11	172.3	28.0	 16
418	 11	203.5	32.8	 16
419	 11	99.5	16.9	 16
420	 11	70.0	11.2	 16
421	 11	99.3	16.1	 16
422	 11	82.0	11.3	 16
423	 11	202.3	40.2	 16
424	 11	205.8	24.6	 16
425	 11	708.3	109.0	 16
426	 11	130.3	20.7	 16
427	 11	94.0	19.3	 16
428	 11	124.5	16.8	 16
429	 11	93.5	13.8	 16
430	 11	87.5	11.9	 16
431	 11	73.0	11.1	 16
432	 11	142.0	25.3	 16
433	 11	90.5	15.0	 16
434	 11	73.5	38.4	 16
435	 11	132.8	15.5	 16
436	 11	144.8	99.0	 16
437	 11	168.3	33.7	 16
438	 11	1560.0	261.0	 16
439	 11	144.8	19.5	 16
440	 11	90.3	14.3	 16
441	 11	145.5	18.4	 16
442	 11	109.3	18.4	 16
443	 11	191.8	26.8	 16
444	 11	66.0	13.9	 16
445	 11	200.0	32.9	 16
446	 11	88.0	12.9	 16
447	 11	91.3	16.9	 16
448	 11	78.0	12.3	 16
449	 11	72.8	13.5	 16
450	 11	154.8	29.5	 16
451	 11	156.5	22.7	 16
452	 11	115.3	23.1	 16
453	 11	79.8	13.0	 16
454	 11	82.3	9.6	 16
455	 11	167.5	25.1	 16
456	 11	91.3	13.4	 16
457	 11	197.8	29.3	 16
458	 11	156.8	22.5	 16
459	 11	141.3	15.4	 16
460	 11	190.3	41.3	 16
461	 11	81.5	12.6	 20
462	 11	118.5	19.3	 16
463	 11	249.0	42.0	 16
464	 11	176.0	19.9	 16
465	 11	80.0	14.5	 16
466	 11	93.5	15.3	 16
467	 11	69.5	9.2	 16
468	 11	135.8	22.2	 16
469	 11	456.5	64.2	 16
470	 11	89.5	14.3	 16
471	 11	115.0	18.0	 16
472	 11	184.5	24.1	 16
473	 11	94.3	15.6	 16
474	 11	88.0	12.4	 16
475	 11	76.8	11.8	 16
476	 11	127.3	17.7	 16
477	 11	76.8	13.0	 16
478	 11	116.0	21.3	 16
479	 11	146.8	19.4	 16
480	 11	94.0	12.5	 16
481	 11	271.8	28.7	 16
482	 11	105.8	13.9	 16
483	 11	101.5	18.8	 16
484	 11	64.0	9.6	 16
485	 11	89.0	16.2	 16
486	 11	270.0	52.6	 16
487	 11	162.5	29.3	 16
488	 11	90.0	11.6	 16
489	 11	82.0	16.4	 16
490	 11	88.3	7.1	 16
491	 11	78.5	10.5	 16
492	 11	109.3	16.0	 16
493	 11	102.0	10.8	 16
494	 11	223.8	21.6	 16
495	 11	86.0	12.6	 16
496	 11	468.0	44.4	 16
497	 11	503.3	58.9	 16
498	 11	464.5	39.0	 16
499	 11	215.8	24.4	 16
500	 11	126.0	21.5	 16
501	 11	113.0	15.6	 16
502	 11	86.0	16.5	 16
503	 11	92.3	12.3	 16
504	 11	391.0	38.7	 16
505	 11	99.3	13.2	 16
506	 11	71.8	11.9	 16
507	 11	87.3	12.4	 16
508	 11	77.0	13.9	 16
509	 11	70.0	9.2	 16
510	 11	147.0	20.0	 16
511	 11	128.0	22.4	 16
512	 11	90.3	17.5	 16
513	 11	123.3	15.4	 16
514	 11	297.0	287.3	 16
515	 11	86.3	11.1	 16
516	 11	109.3	15.4	 16
517	 11	170.5	29.9	 16
518	 11	75.3	23.2	 16
519	 11	391.0	66.6	 16
520	 11	455.5	36.0	 16
521	 11	369.5	36.2	 16
522	 11	68.0	6.8	 16
523	 11	84.0	12.3	 16
524	 11	103.5	16.2	 16
525	 11	72.0	14.0	 16
526	 11	70.8	12.8	 16
527	 11	99.8	17.7	 16
528	 11	79.5	18.1	 16
529	 11	132.5	17.7	 16
530	 11	98.8	16.8	 16
531	 11	69.0	9.3	 16
532	 11	166.5	21.0	 16
533	 11	107.8	23.9	 16
534	 11	71.5	14.0	 16
535	 11	70.8	11.3	 16
536	 11	349.3	58.0	 16
537	 11	298.3	47.4	 16
538	 11	184.8	24.6	 16
539	 11	402.0	37.9	 16
540	 11	406.5	61.0	 16
541	 11	104.3	12.6	 16
542	 11	88.3	12.3	 16
543	 11	101.0	15.6	 16
544	 11	82.0	12.2	 16
545	 11	159.3	24.2	 16
546	 11	89.5	13.3	 16
547	 11	171.8	23.5	 16
548	 11	122.5	15.6	 16
549	 11	77.0	11.8	 16
550	 11	250.5	44.2	 16
551	 11	99.5	15.0	 16
552	 11	76.0	11.0	 16
553	 11	128.8	23.9	 16
554	 11	550.3	74.2	 16
555	 11	174.5	21.8	 16
556	 11	324.8	41.3	 16
557	 11	92.5	19.6	 16
558	 11	1352.0	196.1	 16
559	 11	121.8	22.5	 16
560	 11	319.0	33.3	 16
561	 11	592.5	40.5	 16
562	 11	358.0	26.4	 16
563	 11	137.5	20.8	 16
564	 11	278.5	62.8	 16
565	 11	315.3	60.0	 16
566	 11	87.0	15.6	 16
567	 11	105.3	8.7	 16
568	 11	140.8	19.4	 16
569	 11	118.0	16.7	 16
570	 11	2197.5	344.3	 16
571	 11	241.3	30.0	 16
572	 11	78.8	15.7	 16
573	 11	76.0	14.8	 16
574	 11	105.5	20.2	 16
575	 11	106.3	10.5	 16
576	 11	82.8	9.9	 16
577	 11	129.3	31.1	 16
578	 11	116.0	14.6	 16
579	 11	503.3	95.0	 16
580	 11	97.3	14.1	 16
581	 11	389.8	74.2	 16
582	 11	87.3	10.8	 16
583	 11	163.8	21.4	 16
584	 11	82.8	10.6	 16
585	 11	141.5	19.8	 16
586	 11	150.8	35.1	 16
587	 11	211.3	23.4	 16
588	 11	80.3	9.4	 16
589	 11	437.3	102.8	 16
590	 11	122.0	17.7	 16
591	 11	110.0	19.7	 16
592	 11	177.0	25.3	 16
593	 11	97.3	26.9	 16
594	 11	245.3	38.6	 16
595	 11	156.5	24.2	 16
596	 11	275.8	51.6	 16
597	 11	283.5	38.5	 16
598	 11	114.5	12.0	 16
599	 11	155.5	22.6	 16
600	 11	92.3	20.6	 16
601	 11	128.3	21.2	 16
602	 11	157.0	21.4	 16
603	 11	148.3	21.8	 16
604	 11	490.5	101.1	 20
605	 11	76.0	12.5	 16
606	 11	98.3	13.1	 16
607	 11	75.5	13.8	 16
608	 11	85.8	14.7	 16
609	 11	80.8	16.2	 16
610	 11	74.3	22.5	 16
611	 11	252.3	34.9	 16
612	 11	207.5	29.2	 16
613	 11	192.3	29.6	 16
614	 11	160.5	26.8	 16
615	 11	130.3	21.8	 16
616	 11	82.8	11.0	 16
617	 11	83.8	13.5	 16
618	 11	86.0	15.5	 16
619	 11	207.5	25.7	 16
620	 11	74.3	11.1	 16
621	 11	74.0	8.8	 16
622	 11	90.8	22.6	 16
623	 11	73.3	16.2	 16
624	 11	94.3	15.9	 16
625	 11	96.0	15.1	 16
626	 11	105.3	15.3	 16
627	 11	347.0	54.0	 16
628	 11	104.8	17.0	 16
629	 11	75.8	11.3	 16
630	 11	78.3	15.5	 16
631	 11	179.8	30.8	 16
632	 11	190.0	21.4	 16
633	 11	119.5	13.1	 16
634	 11	257.3	30.3	 16
635	 11	85.8	14.6	 16
636	 11	71.3	11.6	 16
637	 11	148.3	19.1	 16
638	 11	117.3	19.1	 16
639	 11	71.5	13.3	 16
640	 11	115.8	18.4	 16
641	 11	121.8	14.2	 16
642	 11	99.0	17.9	 16
643	 11	258.8	39.5	 16
644	 11	160.0	23.3	 16
645	 11	77.8	11.1	 16
646	 11	76.8	14.7	 16
647	 11	95.3	17.9	 16
648	 11	112.5	18.1	 16
649	 11	189.5	18.0	 16
650	 11	86.0	10.3	 16
651	 11	119.5	20.5	 16
652	 11	81.3	9.9	 16
653	 11	75.3	14.1	 16
654	 11	74.5	15.7	 16
655	 11	90.0	11.2	 16
656	 11	71.5	9.8	 16
657	 11	68.0	12.3	 16
658	 11	246.8	43.1	 16
659	 11	85.3	13.0	 16
660	 11	89.3	12.9	 16
661	 11	69.3	13.6	 16
662	 11	107.5	17.6	 16
663	 11	636.0	86.9	 16
664	 11	358.0	48.3	 16
665	 11	196.5	27.2	 16
666	 11	208.3	34.3	 16
667	 11	86.8	16.4	 16
668	 11	120.3	24.4	 16
669	 11	243.5	26.4	 16
670	 11	232.0	41.1	 16
671	 11	779.0	86.6	 16
672	 11	300.5	39.0	 16
673	 11	92.8	16.6	 16
674	 11	97.3	20.3	 16
675	 11	126.5	19.3	 16
676	 11	74.3	7.3	 16
677	 11	300.5	31.9	 16
678	 11	335.3	58.7	 16
679	 11	162.5	27.1	 16
680	 11	200.3	28.3	 16
681	 11	128.0	19.6	 16
682	 11	447.3	34.8	 16
683	 11	190.0	26.6	 16
684	 11	562.3	61.4	 16
685	 11	162.0	20.0	 16
686	 11	122.3	15.3	 16
687	 11	74.3	12.3	 16
688	 11	86.5	12.7	 16
689	 11	74.5	8.6	 16
690	 11	79.5	12.9	 16
691	 11	78.5	13.5	 16
692	 11	76.5	10.8	 16
693	 11	73.3	12.8	 16
694	 11	144.0	20.3	 16
695	 11	129.5	29.3	 16
696	 11	80.0	11.9	 16
697	 11	414.5	51.4	 16
698	 11	174.3	19.1	 16
699	 11	378.8	49.9	 16
700	 11	111.3	11.8	 16
701	 11	189.0	32.7	 16
702	 11	173.3	21.0	 16
703	 11	128.8	23.3	 16
704	 11	74.5	13.2	 16
705	 11	185.5	32.0	 16
706	 11	163.3	27.2	 16
707	 11	97.5	8.4	 16
708	 11	118.0	21.2	 16
709	 11	125.0	18.2	 16
710	 11	258.8	38.2	 16
711	 11	114.5	19.8	 16
  0	 12	5443.0	912.4	 16
  1	 12	100.0	17.5	 16
  2	 12	66.0	7.1	 16
  3	 12	77.5	15.5	 16
  4	 12	70.0	28.7	 16
  5	 12	88.5	14.9	 16
  6	 12	78.3	13.5	 16
  7	 12	115.5	18.1	 16
  8	 12	112.5	17.8	 16
  9	 12	74.8	11.1	 16
 10	 12	71.3	6.9	 16
 11	 12	63.5	15.0	 16
 12	 12	71.0	13.1	 16
 13	 12	71.8	11.6	 16
 14	 12	80.5	15.1	 16
 15	 12	63.3	9.1	 16
 16	 12	58.5	11.0	 16
 17	 12	63.5	11.3	 16
 18	 12	70.0	14.2	 16
 19	 12	73.3	10.5	 16
 20	 12	70.3	11.4	 16
 21	 12	68.5	13.1	 16
 22	 12	72.0	13.0	 16
 23	 12	61.5	11.2	 16
 24	 12	63.8	10.9	 16
 25	 12	70.3	12.5	 16
 26	 12	70.8	13.3	 16
 27	 12	75.0	13.7	 16
 28	 12	67.5	6.8	 16
 29	 12	60.0	9.6	 16
 30	 12	61.3	8.6	 16
 31	 12	75.0	15.5	 16
 32	 12	65.8	12.1	 16
 33	 12	70.5	12.5	 16
 34	 12	67.5	10.3	 16
 35	 12	74.5	11.3	 16
 36	 12	63.8	6.5	 16
 37	 12	65.0	16.9	 16
 38	 12	66.0	12.0	 16
 39	 12	63.0	10.4	 16
 40	 12	62.3	10.7	 16
 41	 12	64.5	16.3	 16
 42	 12	68.0	7.3	 16
 43	 12	64.8	10.3	 20
 44	 12	65.3	8.6	 16
 45	 12	79.3	13.9	 16
 46	 12	72.5	12.7	 16
 47	 12	65.8	11.6	 16
 48	 12	69.0	12.3	 16
 49	 12	67.3	9.8	 16
 50	 12	64.3	10.1	 16
 51	 12	58.3	15.1	 16
 52	 12	62.5	12.0	 16
 53	 12	63.0	10.5	 16
 54	 12	68.0	13.5	 16
 55	 12	63.0	9.3	 16
 56	 12	65.3	12.5	 16
 57	 12	76.3	13.3	 16
 58	 12	60.8	11.7	 16
 59	 12	57.8	13.5	 16
 60	 12	65.3	11.1	 16
 61	 12	65.8	10.8	 16
 62	 12	69.8	22.5	 16
 63	 12	65.3	8.4	 16
 64	 12	72.3	12.1	 16
 65	 12	61.0	9.6	 16
 66	 12	76.3	14.2	 16
 67	 12	65.3	12.2	 16
 68	 12	68.0	32.1	 16
 69	 12	74.0	19.9	 16
 70	 12	77.8	15.1	 16
 71	 12	80.3	19.1	 16
 72	 12	62.3	11.1	 16
 73	 12	65.0	10.7	 16
 74	 12	58.5	8.0	 16
 75	 12	56.8	9.9	 16
 76	 12	71.8	11.9	 16
 77	 12	65.5	10.3	 16
 78	 12	65.0	12.2	 16
 79	 12	63.0	16.1	 16
 80	 12	67.3	10.0	 16
 81	 12	71.0	14.4	 16
 82	 12	70.0	13.8	 16
 83	 12	71.0	15.9	 16
 84	 12	66.5	10.3	 16
 85	 12	65.0	7.4	 16
 86	 12	66.3	9.7	 16
 87	 12	69.0	12.3	 16
 88	 12	68.5	11.5	 16
 89	 12	67.5	15.8	 16
 90	 12	64.3	14.6	 16
 91	 12	68.3	11.3	 16
 92	 12	69.5	12.7	 16
 93	 12	65.8	14.8	 16
 94	 12	74.8	10.8	 16
 95	 12	62.5	7.9	 16
 96	 12	71.3	12.9	 16
 97	 12	68.8	16.5	 16
 98	 12	77.8	15.5	 16
 99	 12	67.0	15.1	 16
100	 12	79.3	14.4	 16
101	 12	66.8	12.1	 16
102	 12	78.5	17.4	 16
103	 12	59.0	7.1	 16
104	 12	74.3	13.7	 16
105	 12	80.8	12.9	 16
106	 12	97.3	18.7	 16
107	 12	71.0	15.6	 16
108	 12	58.5	9.9	 16
109	 12	62.0	12.7	 16
110	 12	70.3	13.5	 16
111	 12	86.3	16.7	 16
112	 12	119.8	17.5	 16
113	 12	311.5	41.4	 16
114	 12	144.8	17.6	 16
115	 12	170.8	17.0	 16
116	 12	171.8	22.1	 16
117	 12	90.3	20.5	 16
118	 12	69.3	11.8	 16
119	 12	100.3	11.1	 16
120	 12	118.5	19.4	 16
121	 12	126.0	32.8	 16
122	 12	96.5	10.6	 16
123	 12	141.0	16.0	 16
124	 12	231.5	26.3	 16
125	 12	82.3	13.9	 16
126	 12	92.8	18.7	 16
127	 12	113.3	18.5	 16
128	 12	83.5	15.4	 16
129	 12	117.0	18.2	 16
130	 12	201.0	34.8	 16
131	 12	87.0	12.3	 16
132	 12	110.3	19.1	 16
133	 12	97.3	11.5	 16
134	 12	77.0	13.1	 16
135	 12	163.5	27.2	 16
136	 12	70.3	9.7	 16
137	 12	76.3	13.6	 16
138	 12	87.0	16.6	 16
139	 12	79.5	12.6	 16
140	 12	85.8	81.4	 16
141	 12	102.5	13.5	 16
142	 12	213.5	33.8	 16
143	 12	175.8	21.3	 16
144	 12	89.3	16.7	 16
145	 12	76.3	12.3	 16
146	 12	95.5	14.4	 16
147	 12	75.3	12.4	 16
148	 12	72.0	17.3	 16
149	 12	133.5	32.7	 16
150	 12	75.3	14.6	 16
151	 12	169.0	18.8	 16
152	 12	108.3	14.4	 16
153	 12	275.0	40.1	 16
154	 12	489.3	80.8	 16
155	 12	94.5	16.7	 16
156	 12	79.3	9.5	 16
157	 12	163.3	21.4	 16
158	 12	493.5	34.4	 16
159	 12	132.3	32.8	 16
160	 12	78.0	11.5	 16
161	 12	124.3	20.0	 16
162	 12	80.0	12.6	 16
163	 12	75.3	15.4	 16
164	 12	78.3	12.0	 16
165	 12	80.3	9.8	 16
166	 12	145.3	19.3	 16
167	 12	77.8	14.5	 16
168	 12	77.0	10.4	 16
169	 12	85.0	40.4	 16
170	 12	127.3	16.5	 16
171	 12	72.5	14.7	 16
172	 12	108.5	13.0	 16
173	 12	93.5	14.3	 16
174	 12	76.3	12.3	 16
175	 12	119.3	18.9	 16
176	 12	145.3	20.3	 16
177	 12	123.3	16.6	 16
178	 12	97.0	15.4	 16
179	 12	86.8	12.4	 16
180	 12	96.3	14.1	 16
181	 12	205.0	24.6	 16
182	 12	103.8	17.0	 16
183	 12	79.0	12.2	 16
184	 12	95.0	19.5	 16
185	 12	85.5	14.9	 16
186	 12	84.3	12.7	 20
187	 12	208.5	26.6	 16
188	 12	101.3	24.4	 16
189	 12	136.8	18.2	 16
190	 12	104.3	17.4	 16
191	 12	108.3	19.3	 16
192	 12	92.5	13.9	 16
193	 12	73.8	11.2	 16
194	 12	107.3	22.2	 16
195	 12	68.8	10.9	 16
196	 12	102.3	17.7	 16
197	 12	68.8	11.0	 16
198	 12	101.5	15.8	 16
199	 12	273.5	24.8	 16
200	 12	75.3	13.2	 16
201	 12	92.3	13.2	 16
202	 12	119.5	23.0	 16
203	 12	78.0	11.8	 16
204	 12	76.8	13.7	 16
205	 12	73.5	11.4	 16
206	 12	72.5	11.4	 16
207	 12	71.5	12.2	 16
208	 12	73.5	7.7	 16
209	 12	97.3	17.1	 16
210	 12	76.3	10.7	 16
211	 12	71.3	13.6	 16
212	 12	157.3	19.4	 16
213	 12	156.5	24.6	 16
214	 12	198.5	52.9	 16
215	 12	440.0	28.7	 16
216	 12	256.8	30.1	 16
217	 12	99.0	11.4	 16
218	 12	82.3	14.2	 16
219	 12	101.5	15.3	 16
220	 12	80.0	13.2	 16
221	 12	115.8	12.4	 16
222	 12	278.0	44.1	 16
223	 12	108.3	22.1	 16
224	 12	75.0	12.8	 16
225	 12	98.3	12.5	 16
226	 12	106.3	13.7	 16
227	 12	80.3	16.8	 16
228	 12	104.3	17.0	 16
229	 12	205.0	27.7	 16
230	 12	258.0	33.4	 16
231	 12	151.5	12.5	 16
232	 12	132.8	18.3	 16
233	 12	89.5	15.7	 16
234	 12	108.8	14.9	 16
235	 12	127.3	16.2	 16
236	 12	197.0	30.9	 16
237	 12	113.3	18.3	 16
238	 12	114.0	19.4	 16
239	 12	89.5	8.6	 16
240	 12	159.0	20.0	 16
241	 12	111.3	20.3	 16
242	 12	108.0	17.2	 16
243	 12	81.3	11.8	 16
244	 12	97.8	14.8	 16
245	 12	92.5	9.7	 16
246	 12	72.8	30.7	 16
247	 12	85.3	11.0	 16
248	 12	104.3	13.8	 16
249	 12	84.5	14.2	 16
250	 12	100.0	19.6	 16
251	 12	107.5	26.1	 16
252	 12	88.0	16.1	 16
253	 12	92.3	15.5	 16
254	 12	77.3	11.5	 16
255	 12	79.5	14.4	 16
256	 12	87.8	16.9	 16
257	 12	72.8	12.0	 16
258	 12	135.3	18.0	 16
259	 12	119.3	11.5	 16
260	 12	90.0	14.2	 16
261	 12	80.0	15.1	 16
262	 12	78.5	17.9	 16
263	 12	102.5	13.7	 16
264	 12	79.8	11.3	 16
265	 12	79.0	11.6	 16
266	 12	304.8	25.5	 16
267	 12	143.8	22.0	 16
268	 12	131.3	43.9	 16
269	 12	127.8	17.0	 16
270	 12	134.0	20.5	 16
271	 12	133.0	12.9	 16
272	 12	82.0	12.6	 16
273	 12	103.3	54.9	 16
274	 12	150.0	17.4	 16
275	 12	218.3	25.9	 16
276	 12	93.8	15.1	 16
277	 12	91.5	14.6	 16
278	 12	117.8	18.0	 16
279	 12	111.3	16.5	 16
280	 12	96.3	12.7	 16
281	 12	111.0	18.9	 16
282	 12	163.8	17.5	 16
283	 12	109.3	17.5	 16
284	 12	80.0	10.9	 16
285	 12	79.0	11.3	 16
286	 12	111.0	15.7	 16
287	 12	95.0	10.7	 16
288	 12	243.8	40.4	 16
289	 12	105.5	16.7	 16
290	 12	72.5	12.9	 16
291	 12	122.3	61.8	 16
292	 12	81.0	12.3	 16
293	 12	108.5	16.5	 16
294	 12	86.3	32.6	 16
295	 12	138.0	11.1	 16
296	 12	213.5	29.2	 16
297	 12	118.5	25.2	 16
298	 12	96.0	16.5	 16
299	 12	142.5	34.4	 16
300	 12	119.3	14.9	 16
301	 12	123.3	47.8	 16
302	 12	111.0	16.2	 16
303	 12	132.3	10.0	 16
304	 12	188.3	29.2	 16
305	 12	621.0	62.1	 16
306	 12	140.0	17.2	 16
307	 12	130.0	19.8	 16
308	 12	187.5	28.2	 16
309	 12	260.3	37.6	 16
310	 12	72.0	12.7	 16
311	 12	105.8	15.9	 16
312	 12	85.0	12.9	 16
313	 12	235.5	32.9	 16
314	 12	101.3	34.3	 16
315	 12	79.0	12.8	 16
316	 12	73.0	733.8	 16
317	 12	94.3	24.1	 16
318	 12	106.8	130.2	 16
319	 12	75.5	15.7	 16
320	 12	81.5	12.2	 16
321	 12	78.3	12.5	 16
322	 12	72.8	27.2	 16
323	 12	185.5	27.9	 16
324	 12	213.3	36.2	 16
325	 12	89.0	14.1	 16
326	 12	99.5	12.5	 16
327	 12	85.3	13.2	 16
328	 12	80.8	9.8	 20
329	 12	83.3	12.3	 16
330	 12	211.3	29.3	 16
331	 12	75.5	14.9	 16
332	 12	80.3	15.2	 16
333	 12	88.3	13.4	 16
334	 12	79.8	13.7	 16
335	 12	120.5	19.6	 16
336	 12	75.0	8.3	 16
337	 12	70.3	10.3	 16
338	 12	80.5	19.6	 16
339	 12	80.5	12.1	 16
340	 12	115.3	65.3	 16
341	 12	158.0	25.4	 16
342	 12	122.8	21.3	 16
343	 12	79.8	15.5	 16
344	 12	108.3	22.4	 16
345	 12	94.0	14.7	 16
346	 12	66.5	7.9	 16
347	 12	85.5	15.0	 16
348	 12	80.3	13.6	 16
349	 12	67.5	10.6	 16
350	 12	407.3	56.1	 16
351	 12	73.0	13.9	 16
352	 12	88.3	13.9	 16
353	 12	161.8	30.4	 16
354	 12	192.5	25.7	 16
355	 12	206.3	31.7	 16
356	 12	166.3	15.4	 16
357	 12	108.3	9.8	 16
358	 12	81.5	13.2	 16
359	 12	81.3	13.6	 16
360	 12	116.0	23.0	 16
361	 12	361.3	32.5	 16
362	 12	93.5	15.9	 16
363	 12	65.0	9.5	 16
364	 12	72.3	11.7	 16
365	 12	82.0	10.9	 16
366	 12	71.3	10.6	 16
367	 12	68.3	12.6	 16
368	 12	96.0	16.4	 16
369	 12	105.0	16.4	 16
370	 12	87.0	12.9	 16
371	 12	216.3	25.7	 16
372	 12	176.8	21.5	 16
373	 12	85.3	13.9	 16
374	 12	86.0	17.1	 16
375	 12	176.8	54.1	 16
376	 12	96.0	14.2	 16
377	 12	111.0	21.7	 16
378	 12	130.5	68.7	 16
379	 12	84.3	11.3	 16
380	 12	80.3	16.9	 16
381	 12	106.5	14.3	 16
382	 12	113.0	15.7	 16
383	 12	77.3	13.2	 16
384	 12	123.3	22.7	 16
385	 12	75.0	10.8	 16
386	 12	72.0	8.9	 16
387	 12	73.5	10.4	 16
388	 12	68.3	13.8	 16
389	 12	79.3	11.9	 16
390	 12	87.5	11.7	 16
391	 12	83.5	12.7	 16
392	 12	83.0	17.1	 16
393	 12	86.8	15.0	 16
394	 12	109.0	14.5	 16
395	 12	82.5	12.9	 16
396	 12	154.0	21.3	 16
397	 12	360.5	37.9	 16
398	 12	201.3	29.2	 16
399	 12	121.5	16.2	 16
400	 12	117.8	20.3	 16
401	 12	97.0	14.6	 16
402	 12	93.0	22.3	 16
403	 12	78.0	12.5	 16
404	 12	91.0	16.2	 16
405	 12	76.5	13.1	 16
406	 12	80.0	12.7	 16
407	 12	75.5	11.4	 16
408	 12	81.8	13.2	 16
409	 12	144.3	15.2	 16
410	 12	202.8	32.5	 16
411	 12	101.3	16.8	 16
412	 12	91.3	14.4	 16
413	 12	80.5	12.5	 16
414	 12	71.3	13.3	 16
415	 12	177.8	24.9	 16
416	 12	132.3	19.9	 16
417	 12	116.0	19.0	 16
418	 12	151.3	16.1	 16
419	 12	95.0	10.6	 16
420	 12	75.5	12.7	 16
421	 12	143.5	22.5	 16
422	 12	78.0	17.9	 16
423	 12	123.3	20.1	 16
424	 12	283.0	26.6	 16
425	 12	272.0	37.1	 16
426	 12	158.3	26.2	 16
427	 12	83.5	11.0	 16
428	 12	81.0	35.3	 16
429	 12	92.3	12.5	 16
430	 12	113.5	18.7	 16
431	 12	74.3	12.4	 16
432	 12	83.8	15.4	 16
433	 12	83.3	16.6	 16
434	 12	74.3	12.6	 16
435	 12	80.3	14.6	 16
436	 12	87.0	13.9	 16
437	 12	91.8	14.1	 16
438	 12	546.0	54.9	 16
439	 12	106.5	18.0	 16
440	 12	88.0	11.8	 16
441	 12	253.3	25.2	 16
442	 12	86.3	12.1	 16
443	 12	120.0	16.7	 16
444	 12	77.3	14.2	 16
445	 12	171.0	21.8	 16
446	 12	81.8	14.8	 16
447	 12	87.5	12.5	 16
448	 12	76.0	11.9	 16
449	 12	76.3	9.4	 16
450	 12	99.0	15.2	 16
451	 12	114.3	20.6	 16
452	 12	69.5	10.7	 16
453	 12	76.0	10.2	 16
454	 12	92.5	22.7	 16
455	 12	73.8	12.2	 16
456	 12	77.0	14.1	 16
457	 12	182.3	23.6	 16
458	 12	128.3	20.6	 16
459	 12	100.3	18.9	 16
460	 12	80.0	11.1	 16
461	 12	94.8	14.3	 16
462	 12	124.3	12.5	 16
463	 12	323.5	34.6	 16
464	 12	124.5	18.6	 16
465	 12	86.0	16.8	 16
466	 12	74.0	9.9	 16
467	 12	79.3	11.2	 16
468	 12	88.3	15.9	 16
469	 12	203.5	28.7	 16
470	 12	127.0	18.5	 20
471	 12	180.5	20.0	 16
472	 12	179.3	14.3	 16
473	 12	93.8	16.2	 16
474	 12	77.3	14.9	 16
475	 12	81.8	12.6	 16
476	 12	73.8	8.0	 16
477	 12	80.0	12.0	 16
478	 12	91.5	16.4	 16
479	 12	92.3	15.1	 16
480	 12	98.8	18.2	 16
481	 12	126.8	9.9	 16
482	 12	87.3	14.2	 16
483	 12	76.0	13.5	 16
484	 12	110.0	78.6	 16
485	 12	71.3	10.3	 16
486	 12	123.3	26.6	 16
487	 12	89.5	11.8	 16
488	 12	73.3	13.3	 16
489	 12	83.8	14.9	 16
490	 12	83.8	12.1	 16
491	 12	79.8	14.5	 16
492	 12	101.3	18.8	 16
493	 12	84.0	13.3	 16
494	 12	417.0	49.0	 16
495	 12	113.8	27.1	 16
496	 12	2662.3	98.3	 16
497	 12	2626.5	137.5	 16
498	 12	2393.8	255.1	 16
499	 12	159.5	31.6	 16
500	 12	94.8	13.7	 16
501	 12	75.0	11.8	 16
502	 12	76.0	9.4	 16
503	 12	81.3	15.3	 16
504	 12	118.5	14.8	 16
505	 12	88.8	19.7	 16
506	 12	71.5	11.0	 16
507	 12	67.8	8.2	 16
508	 12	75.0	13.7	 16
509	 12	75.8	12.2	 16
510	 12	126.0	15.4	 16
511	 12	163.3	22.1	 16
512	 12	90.3	17.1	 16
513	 12	144.8	22.3	 16
514	 12	135.0	15.1	 16
515	 12	94.3	15.0	 16
516	 12	89.0	29.5	 16
517	 12	93.3	12.6	 16
518	 12	78.5	11.9	 16
519	 12	84.0	13.2	 16
520	 12	76.3	9.7	 16
521	 12	139.3	18.9	 16
522	 12	70.5	9.6	 16
523	 12	63.5	10.6	 16
524	 12	241.3	32.2	 16
525	 12	77.0	11.7	 16
526	 12	67.8	8.1	 16
527	 12	69.0	9.6	 16
528	 12	69.3	14.5	 16
529	 12	157.8	26.6	 16
530	 12	82.5	50.7	 16
531	 12	67.5	10.3	 16
532	 12	84.0	14.3	 16
533	 12	102.0	18.2	 16
534	 12	70.3	11.5	 16
535	 12	74.3	13.4	 16
536	 12	141.5	22.9	 16
537	 12	136.5	20.7	 16
538	 12	145.3	18.1	 16
539	 12	281.8	30.3	 16
540	 12	146.0	23.9	 16
541	 12	131.8	15.8	 16
542	 12	141.3	17.2	 16
543	 12	86.5	10.4	 16
544	 12	69.8	10.8	 16
545	 12	84.3	16.1	 16
546	 12	86.0	19.1	 16
547	 12	101.3	16.9	 16
548	 12	111.3	17.9	 16
549	 12	92.3	13.6	 16
550	 12	93.3	14.7	 16
551	 12	82.5	12.2	 16
552	 12	81.3	12.4	 16
553	 12	91.5	13.6	 16
554	 12	129.8	20.8	 16
555	 12	95.0	13.1	 16
556	 12	118.0	14.3	 16
557	 12	97.3	18.7	 16
558	 12	225.3	22.0	 16
559	 12	109.0	17.2	 16
560	 12	465.0	47.5	 16
561	 12	422.0	44.3	 16
562	 12	143.8	16.3	 16
563	 12	127.0	19.8	 16
564	 12	139.3	15.7	 16
565	 12	161.8	35.6	 16
566	 12	88.3	10.4	 16
567	 12	137.0	18.3	 16
568	 12	72.5	11.3	 16
569	 12	77.3	9.7	 16
570	 12	334.0	66.8	 16
571	 12	166.0	26.2	 16
572	 12	78.5	15.1	 16
573	 12	72.5	9.7	 16
574	 12	122.8	41.4	 16
575	 12	83.0	14.7	 16
576	 12	90.8	22.0	 16
577	 12	103.0	15.7	 16
578	 12	147.3	15.1	 16
579	 12	162.8	20.5	 16
580	 12	84.3	13.4	 16
581	 12	231.5	37.2	 16
582	 12	70.5	12.7	 16
583	 12	164.0	28.1	 16
584	 12	99.0	18.5	 16
585	 12	264.5	39.4	 16
586	 12	336.5	59.7	 16
587	 12	105.0	23.3	 16
588	 12	83.5	23.8	 16
589	 12	130.3	20.0	 16
590	 12	107.0	12.8	 16
591	 12	94.8	14.5	 16
592	 12	108.5	21.1	 16
593	 12	81.8	13.4	 16
594	 12	247.0	39.1	 16
595	 12	117.5	18.1	 16
596	 12	126.3	18.9	 16
597	 12	153.8	22.1	 16
598	 12	143.0	25.0	 16
599	 12	122.5	19.2	 16
600	 12	402.3	85.1	 16
601	 12	117.5	16.7	 16
602	 12	127.5	17.8	 16
603	 12	108.3	15.7	 16
604	 12	120.5	17.7	 16
605	 12	68.8	13.1	 16
606	 12	84.3	17.6	 16
607	 12	71.0	10.4	 16
608	 12	75.8	12.0	 16
609	 12	78.0	14.1	 16
610	 12	68.5	10.0	 16
611	 12	99.3	27.3	 16
612	 12	92.8	18.2	 16
613	 12	234.0	64.6	 20
614	 12	109.3	18.5	 16
615	 12	97.8	16.8	 16
616	 12	65.0	12.4	 16
617	 12	89.5	17.7	 16
618	 12	88.3	18.7	 16
619	 12	312.0	34.9	 16
620	 12	72.0	11.5	 16
621	 12	76.5	13.3	 16
622	 12	70.8	11.5	 16
623	 12	65.3	9.0	 16
624	 12	79.3	11.7	 16
625	 12	72.3	11.9	 16
626	 12	87.3	13.4	 16
627	 12	108.0	16.7	 16
628	 12	85.0	14.7	 16
629	 12	82.0	13.8	 16
630	 12	87.8	13.0	 16
631	 12	101.3	16.6	 16
632	 12	110.3	16.5	 16
633	 12	102.3	9.6	 16
634	 12	170.5	20.8	 16
635	 12	90.0	12.4	 16
636	 12	84.3	12.3	 16
637	 12	79.3	10.3	 16
638	 12	88.0	16.7	 16
639	 12	69.5	12.3	 16
640	 12	175.5	18.9	 16
641	 12	98.0	19.2	 16
642	 12	83.3	17.3	 16
643	 12	101.5	17.6	 16
644	 12	114.8	17.1	 16
645	 12	71.0	9.8	 16
646	 12	93.3	14.9	 16
647	 12	106.3	14.3	 16
648	 12	112.3	34.0	 16
649	 12	180.0	32.7	 16
650	 12	80.3	12.0	 16
651	 12	67.3	13.0	 16
652	 12	69.3	8.0	 16
653	 12	74.5	15.2	 16
654	 12	70.0	12.8	 16
655	 12	81.8	10.5	 16
656	 12	75.8	11.8	 16
657	 12	66.3	11.3	 16
658	 12	95.0	10.8	 16
659	 12	81.3	15.6	 16
660	 12	71.3	13.2	 16
661	 12	78.5	11.7	 16
662	 12	101.3	12.9	 16
663	 12	194.3	17.4	 16
664	 12	157.5	29.0	 16
665	 12	84.8	11.9	 16
666	 12	148.3	16.4	 16
667	 12	71.0	10.5	 16
668	 12	105.3	18.0	 16
669	 12	115.3	7.7	 16
670	 12	128.0	17.1	 16
671	 12	261.0	28.5	 16
672	 12	344.5	29.4	 16
673	 12	84.3	17.6	 16
674	 12	105.0	14.9	 16
675	 12	72.0	8.0	 16
676	 12	71.8	14.4	 16
677	 12	95.0	14.0	 16
678	 12	146.0	27.0	 16
679	 12	193.3	32.2	 16
680	 12	248.5	32.6	 16
681	 12	165.8	40.7	 16
682	 12	137.5	19.1	 16
683	 12	192.3	25.8	 16
684	 12	146.0	22.0	 16
685	 12	206.3	27.3	 16
686	 12	107.0	11.6	 16
687	 12	74.5	8.8	 16
688	 12	83.0	13.8	 16
689	 12	76.5	12.8	 16
690	 12	90.8	16.9	 16
691	 12	77.5	13.9	 16
692	 12	70.0	14.6	 16
693	 12	73.0	13.0	 16
694	 12	87.5	11.7	 16
695	 12	88.0	17.7	 16
696	 12	76.3	14.0	 16
697	 12	98.8	13.0	 16
698	 12	73.0	10.5	 16
699	 12	115.5	20.4	 16
700	 12	189.5	30.0	 16
701	 12	100.0	13.0	 16
702	 12	77.3	9.0	 16
703	 12	81.0	14.3	 16
704	 12	77.3	12.2	 16
705	 12	109.3	12.3	 16
706	 12	140.3	68.8	 16
707	 12	110.5	18.2	 16
708	 12	140.8	20.2	 16
709	 12	108.3	14.7	 16
710	 12	106.5	14.0	 16
711	 12	6562.8	727.2	 16
  0	 13	133.0	26.3	 16
  1	 13	155.8	13.8	 16
  2	 13	90.3	15.9	 16
  3	 13	101.5	17.4	 16
  4	 13	157.3	26.7	 16
  5	 13	93.0	9.5	 16
  6	 13	75.8	12.7	 16
  7	 13	100.3	12.2	 16
  8	 13	113.8	15.8	 16
  9	 13	200.3	24.2	 16
 10	 13	120.5	15.4	 16
 11	 13	79.3	14.9	 16
 12	 13	81.5	13.2	 16
 13	 13	87.3	17.7	 16
 14	 13	82.0	17.6	 16
 15	 13	149.8	25.5	 16
 16	 13	251.0	29.9	 16
 17	 13	234.5	36.3	 16
 18	 13	93.8	17.0	 16
 19	 13	98.5	16.2	 16
 20	 13	140.5	15.6	 16
 21	 13	191.3	33.3	 16
 22	 13	85.0	18.7	 16
 23	 13	77.0	14.2	 16
 24	 13	82.8	13.2	 16
 25	 13	102.3	20.7	 16
 26	 13	78.3	12.1	 16
 27	 13	662.0	68.3	 16
 28	 13	170.8	25.9	 16
 29	 13	87.8	13.6	 16
 30	 13	82.0	18.0	 16
 31	 13	529.5	46.5	 16
 32	 13	77.5	11.3	 16
 33	 13	174.5	31.0	 16
 34	 13	491.8	66.5	 16
 35	 13	278.5	43.4	 16
 36	 13	105.5	24.8	 16
 37	 13	300.5	30.1	 16
 38	 13	103.0	20.4	 16
 39	 13	178.0	29.5	 16
 40	 13	122.8	53.8	 16
 41	 13	154.5	23.7	 16
 42	 13	111.5	20.8	 16
 43	 13	113.5	23.0	 16
 44	 13	78.5	14.9	 16
 45	 13	178.5	26.1	 16
 46	 13	374.0	43.3	 16
 47	 13	1830.0	143.2	 16
 48	 13	156.3	19.3	 16
 49	 13	88.0	16.6	 16
 50	 13	87.0	19.0	 16
 51	 13	1056.3	112.4	 16
 52	 13	115.0	18.9	 20
 53	 13	68.0	15.2	 16
 54	 13	78.3	11.7	 16
 55	 13	86.8	22.0	 16
 56	 13	80.3	14.7	 16
 57	 13	86.0	16.2	 16
 58	 13	85.3	8.3	 16
 59	 13	103.0	18.8	 16
 60	 13	107.5	13.8	 16
 61	 13	110.8	15.0	 16
 62	 13	121.0	18.3	 16
 63	 13	131.0	17.7	 16
 64	 13	1303.0	208.1	 16
 65	 13	243.0	43.9	 16
 66	 13	100.3	19.1	 16
 67	 13	136.3	20.3	 16
 68	 13	167.3	17.8	 16
 69	 13	116.5	20.3	 16
 70	 13	65.3	13.4	 16
 71	 13	191.0	22.2	 16
 72	 13	78.5	13.6	 16
 73	 13	79.8	18.0	 16
 74	 13	153.5	31.2	 16
 75	 13	86.5	17.6	 16
 76	 13	79.0	11.0	 16
 77	 13	1826.3	206.7	 16
 78	 13	207.0	50.1	 16
 79	 13	73.0	12.6	 16
 80	 13	183.3	24.2	 16
 81	 13	91.8	14.8	 16
 82	 13	176.5	22.2	 16
 83	 13	131.3	31.2	 16
 84	 13	77.5	11.4	 16
 85	 13	75.5	14.7	 16
 86	 13	183.3	60.1	 16
 87	 13	89.5	13.2	 16
 88	 13	355.5	43.5	 16
 89	 13	579.3	61.8	 16
 90	 13	154.5	21.4	 16
 91	 13	295.0	29.8	 16
 92	 13	77.5	16.0	 16
 93	 13	88.3	18.2	 16
 94	 13	120.5	21.6	 16
 95	 13	85.0	16.8	 16
 96	 13	96.0	24.6	 16
 97	 13	70.3	13.2	 16
 98	 13	83.0	11.3	 16
 99	 13	99.3	15.3	 16
100	 13	84.5	9.8	 16
101	 13	493.3	78.3	 16
102	 13	87.0	16.5	 16
103	 13	104.5	15.8	 16
104	 13	75.5	11.0	 16
105	 13	97.0	16.6	 16
106	 13	316.0	48.2	 16
107	 13	83.5	16.3	 16
108	 13	85.3	12.4	 16
109	 13	77.3	10.7	 16
110	 13	104.3	16.2	 16
111	 13	173.8	29.7	 16
112	 13	275.3	38.3	 16
113	 13	114.3	22.5	 16
114	 13	71.5	10.1	 16
115	 13	109.3	17.2	 16
116	 13	100.0	11.2	 16
117	 13	111.0	20.2	 16
118	 13	81.0	14.1	 16
119	 13	119.3	22.5	 16
120	 13	432.3	56.6	 16
121	 13	142.3	22.3	 16
122	 13	72.0	15.5	 16
123	 13	127.3	18.3	 16
124	 13	205.5	25.9	 16
125	 13	92.3	13.2	 16
126	 13	861.0	92.6	 16
127	 13	105.5	12.5	 16
128	 13	107.3	15.4	 16
129	 13	275.3	35.3	 16
130	 13	86.0	16.7	 16
131	 13	231.0	33.7	 16
132	 13	198.8	24.6	 16
133	 13	248.8	40.1	 16
134	 13	1591.8	143.0	 16
135	 13	99.0	16.2	 16
136	 13	87.8	14.6	 16
137	 13	180.8	23.4	 16
138	 13	158.0	33.9	 16
139	 13	95.0	15.5	 16
140	 13	104.8	21.0	 16
141	 13	78.8	15.7	 16
142	 13	388.3	52.5	 16
143	 13	88.8	17.4	 16
144	 13	205.8	27.3	 16
145	 13	257.8	38.3	 16
146	 13	992.8	108.5	 16
147	 13	86.5	14.1	 16
148	 13	574.3	289.8	 16
149	 13	112.8	16.2	 16
150	 13	119.3	21.2	 16
151	 13	78.0	17.6	 16
152	 13	122.3	22.4	 16
153	 13	4639.3	490.2	 16
154	 13	222.0	32.8	 16
155	 13	93.8	30.5	 16
156	 13	103.8	12.5	 16
157	 13	107.3	10.7	 16
158	 13	118.0	15.6	 16
159	 13	137.3	15.2	 16
160	 13	85.5	18.1	 16
161	 13	126.0	21.0	 16
162	 13	90.3	12.1	 16
163	 13	88.5	11.5	 16
164	 13	127.3	21.2	 16
165	 13	248.0	33.9	 16
166	 13	87.0	14.5	 16
167	 13	129.3	21.9	 16
168	 13	97.3	16.7	 16
169	 13	96.3	14.3	 16
170	 13	78.5	15.0	 16
171	 13	77.3	15.1	 16
172	 13	91.8	12.7	 16
173	 13	78.5	12.0	 16
174	 13	125.3	14.3	 16
175	 13	111.3	13.7	 16
176	 13	104.3	16.6	 16
177	 13	79.0	12.9	 16
178	 13	169.3	23.4	 16
179	 13	79.8	9.9	 16
180	 13	288.8	45.2	 16
181	 13	153.3	17.7	 16
182	 13	157.8	27.4	 16
183	 13	86.0	12.1	 16
184	 13	106.3	17.0	 16
185	 13	73.0	11.1	 16
186	 13	987.8	135.0	 16
187	 13	347.3	31.8	 16
188	 13	163.8	22.6	 16
189	 13	108.3	16.5	 16
190	 13	144.3	32.8	 16
191	 13	116.3	20.8	 16
192	 13	126.5	24.0	 16
193	 13	122.3	13.8	 16
194	 13	87.8	14.6	 16
195	 13	166.0	25.0	 20
196	 13	119.5	17.3	 16
197	 13	87.0	13.0	 16
198	 13	205.5	40.3	 16
199	 13	100.8	13.5	 16
200	 13	221.3	38.5	 16
201	 13	78.3	11.4	 16
202	 13	140.3	19.6	 16
203	 13	111.3	18.5	 16
204	 13	89.3	15.3	 16
205	 13	81.0	13.4	 16
206	 13	104.0	14.5	 16
207	 13	89.8	20.8	 16
208	 13	83.5	11.7	 16
209	 13	78.5	12.5	 16
210	 13	103.5	18.1	 16
211	 13	158.3	26.3	 16
212	 13	1321.3	267.4	 16
213	 13	142.3	16.0	 16
214	 13	77.0	12.1	 16
215	 13	95.8	17.6	 16
216	 13	88.3	16.9	 16
217	 13	76.5	10.7	 16
218	 13	75.3	13.8	 16
219	 13	79.3	9.3	 16
220	 13	159.5	20.2	 16
221	 13	142.3	15.9	 16
222	 13	129.3	21.2	 16
223	 13	231.8	22.6	 16
224	 13	96.3	18.6	 16
225	 13	86.3	10.1	 16
226	 13	90.0	14.4	 16
227	 13	112.0	19.0	 16
228	 13	121.8	12.8	 16
229	 13	94.8	15.7	 16
230	 13	87.0	14.5	 16
231	 13	287.8	41.5	 16
232	 13	271.5	31.8	 16
233	 13	249.3	22.1	 16
234	 13	94.0	17.8	 16
235	 13	508.0	55.1	 16
236	 13	335.8	33.4	 16
237	 13	1350.5	159.9	 16
238	 13	1285.3	123.0	 16
239	 13	583.5	65.8	 16
240	 13	259.3	41.0	 16
241	 13	2508.8	321.3	 16
242	 13	2032.5	393.5	 16
243	 13	143.8	25.5	 16
244	 13	164.8	21.3	 16
245	 13	74.8	13.1	 16
246	 13	124.8	21.2	 16
247	 13	127.3	26.4	 16
248	 13	124.3	18.5	 16
249	 13	94.5	18.5	 16
250	 13	75.0	10.6	 16
251	 13	75.3	13.4	 16
252	 13	78.8	17.9	 16
253	 13	75.3	14.0	 16
254	 13	95.3	14.6	 16
255	 13	90.0	12.3	 16
256	 13	295.5	39.9	 16
257	 13	98.0	19.9	 16
258	 13	124.5	17.0	 16
259	 13	76.5	12.5	 16
260	 13	70.3	14.6	 16
261	 13	116.5	20.6	 16
262	 13	122.8	14.2	 16
263	 13	195.5	14.7	 16
264	 13	91.3	19.8	 16
265	 13	133.5	19.8	 16
266	 13	195.8	31.5	 16
267	 13	203.0	32.1	 16
268	 13	98.3	15.4	 16
269	 13	298.0	36.2	 16
270	 13	218.5	36.8	 16
271	 13	104.5	14.0	 16
272	 13	132.0	21.3	 16
273	 13	99.5	17.0	 16
274	 13	90.8	15.0	 16
275	 13	92.5	13.0	 16
276	 13	1310.8	126.8	 16
277	 13	72.5	10.8	 16
278	 13	76.5	12.7	 16
279	 13	105.3	68.1	 16
280	 13	85.0	13.8	 16
281	 13	78.3	9.9	 16
282	 13	113.8	17.1	 16
283	 13	161.3	21.0	 16
284	 13	73.5	13.9	 16
285	 13	89.3	11.0	 16
286	 13	470.8	62.5	 16
287	 13	175.3	23.6	 16
288	 13	84.3	15.5	 16
289	 13	94.0	12.7	 16
290	 13	275.8	35.6	 16
291	 13	112.8	16.0	 16
292	 13	154.0	21.2	 16
293	 13	85.3	12.5	 16
294	 13	142.5	17.4	 16
295	 13	237.0	30.4	 16
296	 13	154.3	20.1	 16
297	 13	135.8	18.1	 16
298	 13	269.3	40.3	 16
299	 13	217.5	21.5	 16
300	 13	198.3	19.7	 16
301	 13	154.8	19.7	 16
302	 13	214.5	25.3	 16
303	 13	148.3	17.0	 16
304	 13	336.3	52.4	 16
305	 13	213.5	30.3	 16
306	 13	293.8	35.8	 16
307	 13	106.8	13.3	 16
308	 13	100.5	20.2	 16
309	 13	340.3	33.4	 16
310	 13	249.0	26.3	 16
311	 13	116.0	13.4	 16
312	 13	101.0	13.3	 16
313	 13	106.3	16.2	 16
314	 13	94.3	15.6	 16
315	 13	96.3	17.6	 16
316	 13	126.8	20.3	 16
317	 13	121.3	22.6	 16
318	 13	76.3	11.5	 16
319	 13	93.0	12.2	 16
320	 13	132.3	15.8	 16
321	 13	122.8	20.2	 16
322	 13	163.3	26.2	 16
323	 13	904.8	167.6	 16
324	 13	120.5	17.7	 16
325	 13	184.3	25.1	 16
326	 13	173.3	21.4	 16
327	 13	169.5	25.2	 16
328	 13	80.5	10.7	 16
329	 13	298.0	38.1	 16
330	 13	258.5	29.0	 16
331	 13	305.5	46.1	 16
332	 13	136.0	67.6	 16
333	 13	139.0	23.2	 16
334	 13	109.5	31.1	 16
335	 13	75.0	10.2	 16
336	 13	98.3	18.2	 16
337	 13	89.5	16.5	 20
338	 13	164.0	26.6	 16
339	 13	215.5	25.6	 16
340	 13	208.8	23.3	 16
341	 13	1595.3	253.9	 16
342	 13	98.5	14.8	 16
343	 13	81.5	13.6	 16
344	 13	81.3	13.5	 16
345	 13	122.0	20.5	 16
346	 13	272.8	49.4	 16
347	 13	79.3	14.1	 16
348	 13	184.3	34.7	 16
349	 13	821.3	209.0	 16
350	 13	1448.3	172.3	 16
351	 13	181.5	31.7	 16
352	 13	172.5	25.5	 16
353	 13	1285.8	168.3	 16
354	 13	334.8	37.4	 16
355	 13	270.8	27.9	 16
356	 13	197.3	23.5	 16
357	 13	160.5	23.9	 16
358	 13	89.5	13.9	 16
359	 13	98.8	28.3	 16
360	 13	89.0	12.8	 16
361	 13	276.8	34.2	 16
362	 13	131.3	22.3	 16
363	 13	80.0	11.9	 16
364	 13	89.5	11.6	 16
365	 13	73.0	14.1	 16
366	 13	85.5	16.8	 16
367	 13	288.8	34.0	 16
368	 13	80.3	16.0	 16
369	 13	84.3	11.8	 16
370	 13	230.0	27.2	 16
371	 13	309.0	37.2	 16
372	 13	260.3	43.6	 16
373	 13	106.0	12.0	 16
374	 13	61.5	12.4	 16
375	 13	174.5	19.8	 16
376	 13	120.3	19.2	 16
377	 13	231.0	44.9	 16
378	 13	106.0	16.7	 16
379	 13	244.8	27.6	 16
380	 13	238.0	24.2	 16
381	 13	67.5	10.5	 16
382	 13	81.3	14.3	 16
383	 13	147.5	24.0	 16
384	 13	286.5	42.0	 16
385	 13	89.3	14.8	 16
386	 13	96.5	17.5	 16
387	 13	92.3	12.2	 16
388	 13	99.0	15.3	 16
389	 13	94.5	10.7	 16
390	 13	169.0	20.6	 16
391	 13	156.5	52.8	 16
392	 13	73.8	10.7	 16
393	 13	72.3	13.0	 16
394	 13	201.5	24.7	 16
395	 13	96.3	16.3	 16
396	 13	200.0	28.6	 16
397	 13	225.3	23.2	 16
398	 13	131.0	20.0	 16
399	 13	96.0	14.2	 16
400	 13	501.0	40.6	 16
401	 13	207.3	20.5	 16
402	 13	122.0	12.3	 16
403	 13	78.5	14.5	 16
404	 13	109.0	17.9	 16
405	 13	79.0	14.7	 16
406	 13	167.3	22.9	 16
407	 13	174.0	19.7	 16
408	 13	108.8	18.6	 16
409	 13	107.5	13.4	 16
410	 13	312.5	55.4	 16
411	 13	108.3	20.0	 16
412	 13	114.3	20.3	 16
413	 13	460.5	34.1	 16
414	 13	186.5	23.4	 16
415	 13	219.8	22.1	 16
416	 13	147.8	20.4	 16
417	 13	161.0	22.4	 16
418	 13	167.8	23.7	 16
419	 13	127.3	16.9	 16
420	 13	94.0	18.9	 16
421	 13	80.0	9.4	 16
422	 13	142.0	14.7	 16
423	 13	92.0	17.0	 16
424	 13	119.5	20.0	 16
425	 13	119.5	18.9	 16
426	 13	81.3	9.2	 16
427	 13	473.5	71.4	 16
428	 13	119.3	12.2	 16
429	 13	145.3	19.8	 16
430	 13	94.0	16.6	 16
431	 13	206.8	29.6	 16
432	 13	384.5	46.9	 16
433	 13	812.3	100.7	 16
434	 13	1029.0	136.0	 16
435	 13	129.8	22.9	 16
436	 13	93.0	13.1	 16
437	 13	248.0	36.2	 16
438	 13	177.5	37.2	 16
439	 13	2095.3	254.6	 16
440	 13	117.8	20.7	 16
441	 13	157.3	21.4	 16
442	 13	152.5	17.0	 16
443	 13	96.5	14.1	 16
444	 13	115.8	12.6	 16
445	 13	80.3	12.2	 16
446	 13	128.8	21.9	 16
447	 13	78.3	12.1	 16
448	 13	94.5	16.5	 16
449	 13	74.3	9.2	 16
450	 13	76.0	10.1	 16
451	 13	89.0	13.4	 16
452	 13	65.5	9.1	 16
453	 13	105.3	27.6	 16
454	 13	94.5	14.0	 16
455	 13	217.3	26.5	 16
456	 13	75.3	12.2	 16
457	 13	92.8	16.1	 16
458	 13	114.3	24.8	 16
459	 13	88.3	12.9	 16
460	 13	106.3	11.8	 16
461	 13	153.5	23.1	 16
462	 13	536.5	56.1	 16
463	 13	201.3	32.7	 16
464	 13	105.0	43.8	 16
465	 13	216.3	26.0	 16
466	 13	188.5	28.4	 16
467	 13	190.3	23.3	 16
468	 13	72.5	13.0	 16
469	 13	125.3	18.4	 16
470	 13	108.8	19.0	 16
471	 13	184.3	23.3	 16
472	 13	80.3	12.8	 16
473	 13	300.8	45.8	 16
474	 13	131.5	15.1	 16
475	 13	81.8	11.5	 16
476	 13	93.0	10.8	 16
477	 13	84.8	11.9	 16
478	 13	84.5	12.2	 16
479	 13	88.0	14.1	 16
480	 13	12299.5	1698.7	 20
481	 13	323.0	57.9	 16
482	 13	148.8	27.8	 16
483	 13	81.0	12.8	 16
484	 13	84.0	11.9	 16
485	 13	289.8	30.4	 16
486	 13	304.3	39.6	 16
487	 13	290.3	48.3	 16
488	 13	146.5	22.8	 16
489	 13	86.0	9.7	 16
490	 13	92.0	12.3	 16
491	 13	84.3	12.6	 16
492	 13	84.3	17.1	 16
493	 13	93.3	15.1	 16
494	 13	90.8	18.7	 16
495	 13	119.3	16.9	 16
496	 13	89.3	16.2	 16
497	 13	146.0	30.7	 16
498	 13	86.0	12.0	 16
499	 13	165.8	37.9	 16
500	 13	167.0	31.9	 16
501	 13	102.8	18.1	 16
502	 13	115.5	21.2	 16
503	 13	73.3	16.4	 16
504	 13	138.5	22.5	 16
505	 13	76.3	8.6	 16
506	 13	201.3	28.2	 16
507	 13	122.5	14.3	 16
508	 13	833.3	160.7	 16
509	 13	313.5	57.5	 16
510	 13	103.3	13.1	 16
511	 13	184.3	61.1	 16
512	 13	119.5	26.0	 16
513	 13	150.5	17.9	 16
514	 13	202.3	27.7	 16
515	 13	217.0	20.0	 16
516	 13	197.8	31.1	 16
517	 13	130.3	18.3	 16
518	 13	78.5	8.6	 16
519	 13	126.5	13.2	 16
520	 13	101.3	15.3	 16
521	 13	90.3	12.9	 16
522	 13	143.0	15.9	 16
523	 13	149.3	17.0	 16
524	 13	161.5	23.5	 16
525	 13	86.3	16.3	 16
526	 13	107.8	15.3	 16
527	 13	204.3	38.7	 16
528	 13	304.0	29.4	 16
529	 13	234.8	28.8	 16
530	 13	110.3	11.8	 16
531	 13	92.3	8.6	 16
532	 13	160.3	21.8	 16
533	 13	88.0	11.4	 16
534	 13	90.3	13.3	 16
535	 13	413.5	45.6	 16
536	 13	96.0	11.8	 16
537	 13	132.0	13.0	 16
538	 13	166.3	24.5	 16
539	 13	137.0	22.0	 16
540	 13	118.8	17.4	 16
541	 13	213.3	27.3	 16
542	 13	76.5	15.1	 16
543	 13	105.3	13.2	 16
544	 13	81.0	14.6	 16
545	 13	138.0	19.2	 16
546	 13	241.5	39.5	 16
547	 13	844.5	93.4	 16
548	 13	517.5	52.9	 16
549	 13	174.3	26.7	 16
550	 13	69.0	11.1	 16
551	 13	123.3	24.8	 16
552	 13	70.5	10.5	 16
553	 13	2193.0	241.9	 16
554	 13	72.5	12.1	 16
555	 13	68.5	12.1	 16
556	 13	623.3	69.8	 16
557	 13	79.0	8.2	 16
558	 13	82.3	11.3	 16
559	 13	105.5	17.8	 16
560	 13	104.0	15.9	 16
561	 13	85.3	12.2	 16
562	 13	117.3	12.4	 16
563	 13	694.3	121.6	 16
564	 13	137.3	20.2	 16
565	 13	96.0	17.1	 16
566	 13	195.0	24.4	 16
567	 13	286.0	38.5	 16
568	 13	199.3	28.4	 16
569	 13	170.5	24.5	 16
570	 13	88.5	11.3	 16
571	 13	85.3	14.7	 16
572	 13	96.5	15.0	 16
573	 13	131.3	23.0	 16
574	 13	119.5	21.7	 16
575	 13	146.0	22.1	 16
576	 13	144.5	24.8	 16
577	 13	119.3	16.8	 16
578	 13	261.5	34.4	 16
579	 13	466.5	76.5	 16
580	 13	182.3	24.5	 16
581	 13	165.0	18.3	 16
582	 13	107.5	16.4	 16
583	 13	82.8	8.8	 16
584	 13	277.0	33.2	 16
585	 13	105.3	15.1	 16
586	 13	110.5	12.5	 16
587	 13	179.8	26.6	 16
588	 13	68.3	12.1	 16
589	 13	113.8	21.1	 16
590	 13	90.5	15.1	 16
591	 13	192.5	25.6	 16
592	 13	570.8	95.7	 16
593	 13	122.8	22.5	 16
594	 13	210.0	17.4	 16
595	 13	332.0	35.4	 16
596	 13	80.0	9.7	 16
597	 13	1022.5	175.6	 16
598	 13	208.0	22.3	 16
599	 13	126.3	22.5	 16
600	 13	117.0	18.4	 16
601	 13	129.0	16.4	 16
602	 13	176.8	31.6	 16
603	 13	84.0	13.4	 16
604	 13	99.3	15.1	 16
605	 13	170.8	24.7	 16
606	 13	150.3	22.2	 16
607	 13	93.8	14.7	 16
608	 13	109.3	23.7	 16
609	 13	94.3	15.6	 16
610	 13	78.3	14.2	 16
611	 13	81.0	13.8	 16
612	 13	99.0	20.1	 16
613	 13	118.5	18.8	 16
614	 13	121.8	17.0	 16
615	 13	218.5	30.5	 16
616	 13	270.5	41.4	 16
617	 13	139.8	16.5	 16
618	 13	103.5	20.3	 16
619	 13	235.8	36.0	 16
620	 13	80.3	12.8	 16
621	 13	83.3	15.4	 16
622	 13	119.3	23.9	 20
623	 13	116.0	12.0	 16
624	 13	95.3	9.7	 16
625	 13	75.5	16.8	 16
626	 13	75.5	14.6	 16
627	 13	76.8	12.2	 16
628	 13	87.3	16.9	 16
629	 13	77.5	12.7	 16
630	 13	776.0	77.7	 16
631	 13	1141.3	128.0	 16
632	 13	112.0	16.7	 16
633	 13	243.3	25.6	 16
634	 13	557.0	86.8	 16
635	 13	293.5	40.0	 16
636	 13	537.0	97.5	 16
637	 13	94.0	14.0	 16
638	 13	385.5	43.7	 16
639	 13	121.5	16.3	 16
640	 13	138.8	18.1	 16
641	 13	156.3	24.7	 16
642	 13	161.3	29.0	 16
643	 13	100.3	14.5	 16
644	 13	154.0	112.1	 16
645	 13	136.3	18.4	 16
646	 13	101.3	17.6	 16
647	 13	183.5	24.3	 16
648	 13	82.3	12.6	 16
649	 13	78.0	12.4	 16
650	 13	103.8	15.5	 16
651	 13	83.3	11.0	 16
652	 13	231.8	22.0	 16
653	 13	78.8	14.4	 16
654	 13	82.8	15.0	 16
655	 13	68.8	11.9	 16
656	 13	66.0	9.3	 16
657	 13	80.0	11.0	 16
658	 13	350.0	35.0	 16
659	 13	428.8	71.3	 16
660	 13	864.8	139.3	 16
661	 13	144.3	19.9	 16
662	 13	147.8	30.5	 16
663	 13	310.3	36.7	 16
664	 13	638.5	136.0	 16
665	 13	135.8	28.6	 16
666	 13	698.8	136.0	 16
667	 13	81.0	10.8	 16
668	 13	331.3	45.7	 16
669	 13	68.8	10.2	 16
670	 13	93.3	10.1	 16
671	 13	86.5	13.8	 16
672	 13	84.3	12.9	 16
673	 13	100.5	15.4	 16
674	 13	72.0	12.7	 16
675	 13	66.5	11.9	 16
676	 13	121.8	23.3	 16
677	 13	114.3	13.6	 16
678	 13	81.0	10.1	 16
679	 13	133.0	26.7	 16
680	 13	377.5	29.2	 16
681	 13	94.5	14.5	 16
682	 13	140.5	19.3	 16
683	 13	129.5	17.5	 16
684	 13	166.0	23.3	 16
685	 13	157.5	27.8	 16
686	 13	101.8	37.8	 16
687	 13	75.0	12.8	 16
688	 13	96.8	18.3	 16
689	 13	490.8	71.8	 16
690	 13	146.8	83.1	 16
691	 13	248.5	36.6	 16
692	 13	221.3	32.2	 16
693	 13	307.5	31.7	 16
694	 13	98.5	12.5	 16
695	 13	105.5	19.5	 16
696	 13	151.3	18.4	 16
697	 13	93.8	15.8	 16
698	 13	1182.0	134.6	 16
699	 13	214.8	24.0	 16
700	 13	133.8	21.4	 16
701	 13	179.0	20.4	 16
702	 13	1005.8	102.7	 16
703	 13	158.3	27.9	 16
704	 13	121.3	17.7	 16
705	 13	116.5	16.8	 16
706	 13	113.0	15.7	 16
707	 13	430.0	49.2	 16
708	 13	184.5	55.5	 16
709	 13	116.0	8.9	 16
710	 13	528.5	43.8	 16
711	 13	104.5	17.0	 16
  0	 14	6052.8	1125.0	 16
  1	 14	190.0	19.7	 16
  2	 14	106.3	23.1	 16
  3	 14	79.3	16.6	 16
  4	 14	111.8	12.5	 16
  5	 14	91.5	17.0	 16
  6	 14	71.0	13.2	 16
  7	 14	83.8	14.1	 16
  8	 14	265.8	52.1	 16
  9	 14	140.8	23.3	 16
 10	 14	85.5	14.5	 16
 11	 14	87.3	11.3	 16
 12	 14	77.8	16.4	 16
 13	 14	76.3	11.2	 16
 14	 14	86.0	23.9	 16
 15	 14	193.0	26.7	 16
 16	 14	208.5	36.5	 16
 17	 14	88.0	10.5	 16
 18	 14	83.3	15.7	 16
 19	 14	80.0	7.3	 16
 20	 14	94.8	14.6	 16
 21	 14	121.3	515.8	 16
 22	 14	104.5	34.5	 16
 23	 14	103.5	21.5	 16
 24	 14	81.8	13.8	 16
 25	 14	63.3	12.9	 16
 26	 14	83.5	17.2	 16
 27	 14	111.5	19.3	 16
 28	 14	78.3	16.6	 16
 29	 14	80.8	16.6	 16
 30	 14	63.0	11.2	 16
 31	 14	128.0	22.1	 16
 32	 14	89.5	15.5	 16
 33	 14	83.5	50.6	 16
 34	 14	103.3	16.9	 16
 35	 14	84.5	17.1	 16
 36	 14	100.8	16.7	 16
 37	 14	105.0	14.2	 16
 38	 14	88.8	16.3	 16
 39	 14	105.3	14.4	 16
 40	 14	81.0	13.0	 16
 41	 14	200.5	27.9	 16
 42	 14	85.8	16.9	 16
 43	 14	81.3	9.1	 16
 44	 14	73.8	11.1	 16
 45	 14	183.0	30.0	 16
 46	 14	164.3	28.4	 16
 47	 14	708.0	124.9	 16
 48	 14	204.8	26.9	 16
 49	 14	82.3	13.8	 16
 50	 14	77.3	11.6	 16
 51	 14	275.8	35.5	 16
 52	 14	87.0	12.9	 16
 53	 14	74.0	13.8	 16
 54	 14	74.8	12.0	 16
 55	 14	81.3	14.4	 16
 56	 14	77.5	13.7	 16
 57	 14	68.5	9.3	 16
 58	 14	69.3	11.7	 16
 59	 14	72.3	9.1	 16
 60	 14	80.3	12.1	 16
 61	 14	103.0	17.8	 16
 62	 14	173.0	22.5	 20
 63	 14	159.3	30.3	 16
 64	 14	184.5	37.8	 16
 65	 14	71.0	10.8	 16
 66	 14	99.5	16.9	 16
 67	 14	104.3	18.0	 16
 68	 14	94.5	15.5	 16
 69	 14	74.3	15.0	 16
 70	 14	67.8	12.5	 16
 71	 14	93.8	15.7	 16
 72	 14	81.0	12.8	 16
 73	 14	69.8	13.8	 16
 74	 14	79.5	14.2	 16
 75	 14	72.3	8.0	 16
 76	 14	96.5	14.2	 16
 77	 14	257.0	46.4	 16
 78	 14	90.0	19.0	 16
 79	 14	80.3	13.2	 16
 80	 14	104.0	13.9	 16
 81	 14	93.0	14.7	 16
 82	 14	86.8	19.3	 16
 83	 14	79.5	13.8	 16
 84	 14	78.3	16.3	 16
 85	 14	82.8	17.2	 16
 86	 14	127.5	14.3	 16
 87	 14	94.3	12.3	 16
 88	 14	253.0	33.0	 16
 89	 14	443.0	52.9	 16
 90	 14	103.0	16.3	 16
 91	 14	206.8	34.6	 16
 92	 14	78.0	16.4	 16
 93	 14	96.0	23.9	 16
 94	 14	181.5	19.5	 16
 95	 14	85.3	11.1	 16
 96	 14	72.8	8.9	 16
 97	 14	73.3	11.6	 16
 98	 14	72.8	72.8	 16
 99	 14	91.5	15.6	 16
100	 14	80.0	15.9	 16
101	 14	153.3	18.9	 16
102	 14	82.3	12.8	 16
103	 14	110.0	17.2	 16
104	 14	81.5	14.2	 16
105	 14	75.0	10.7	 16
106	 14	105.0	18.3	 16
107	 14	66.5	9.3	 16
108	 14	69.8	11.4	 16
109	 14	69.3	14.6	 16
110	 14	95.5	14.6	 16
111	 14	93.3	12.5	 16
112	 14	125.5	23.9	 16
113	 14	104.5	18.9	 16
114	 14	96.3	16.2	 16
115	 14	89.0	14.0	 16
116	 14	113.0	17.8	 16
117	 14	88.0	15.2	 16
118	 14	86.8	13.5	 16
119	 14	126.0	18.4	 16
120	 14	158.8	19.5	 16
121	 14	101.3	13.4	 16
122	 14	75.8	13.6	 16
123	 14	94.3	12.7	 16
124	 14	97.3	13.7	 16
125	 14	155.5	31.7	 16
126	 14	170.0	19.6	 16
127	 14	109.3	19.7	 16
128	 14	96.5	13.3	 16
129	 14	153.3	20.6	 16
130	 14	92.3	11.0	 16
131	 14	93.8	15.3	 16
132	 14	91.8	17.7	 16
133	 14	98.0	11.7	 16
134	 14	326.3	57.6	 16
135	 14	85.3	14.0	 16
136	 14	95.3	15.0	 16
137	 14	71.3	11.3	 16
138	 14	387.5	48.5	 16
139	 14	116.5	51.8	 16
140	 14	90.5	17.0	 16
141	 14	77.0	13.5	 16
142	 14	63.8	7.9	 16
143	 14	76.0	14.1	 16
144	 14	110.3	15.3	 16
145	 14	182.0	23.5	 16
146	 14	395.5	52.2	 16
147	 14	88.8	17.4	 16
148	 14	187.0	23.5	 16
149	 14	110.5	12.7	 16
150	 14	105.5	16.4	 16
151	 14	71.0	8.3	 16
152	 14	72.5	18.6	 16
153	 14	1776.5	269.2	 16
154	 14	86.3	13.1	 16
155	 14	73.0	9.3	 16
156	 14	106.3	14.5	 16
157	 14	121.5	17.1	 16
158	 14	200.0	30.3	 16
159	 14	122.3	21.7	 16
160	 14	77.3	8.3	 16
161	 14	90.3	11.9	 16
162	 14	110.3	18.5	 16
163	 14	86.0	13.1	 16
164	 14	99.3	16.0	 16
165	 14	80.0	15.6	 16
166	 14	101.3	17.7	 16
167	 14	100.3	11.3	 16
168	 14	90.0	16.0	 16
169	 14	70.0	9.8	 16
170	 14	77.5	15.8	 16
171	 14	75.3	13.8	 16
172	 14	84.8	15.7	 16
173	 14	64.5	10.6	 16
174	 14	91.0	20.7	 16
175	 14	82.0	11.6	 16
176	 14	95.0	13.7	 16
177	 14	108.8	17.4	 16
178	 14	104.0	19.8	 16
179	 14	85.0	16.0	 16
180	 14	169.3	22.1	 16
181	 14	133.0	12.5	 16
182	 14	255.8	27.8	 16
183	 14	82.0	13.4	 16
184	 14	93.5	11.2	 16
185	 14	81.0	13.3	 16
186	 14	250.5	52.3	 16
187	 14	101.3	16.6	 16
188	 14	135.0	21.0	 16
189	 14	166.0	26.0	 16
190	 14	96.0	15.8	 16
191	 14	104.3	12.4	 16
192	 14	82.3	15.5	 16
193	 14	91.3	13.2	 16
194	 14	92.8	16.8	 16
195	 14	105.0	16.3	 16
196	 14	163.5	19.7	 16
197	 14	73.3	14.1	 16
198	 14	104.3	12.2	 16
199	 14	125.0	23.6	 16
200	 14	118.3	22.7	 16
201	 14	68.5	13.2	 16
202	 14	74.5	13.3	 16
203	 14	93.0	14.6	 16
204	 14	94.0	11.5	 20
205	 14	94.5	15.0	 16
206	 14	92.3	16.0	 16
207	 14	79.8	14.9	 16
208	 14	81.0	14.9	 16
209	 14	68.3	12.2	 16
210	 14	98.5	12.4	 16
211	 14	82.0	11.9	 16
212	 14	393.8	96.4	 16
213	 14	89.5	14.7	 16
214	 14	77.5	11.4	 16
215	 14	76.5	10.9	 16
216	 14	82.8	17.6	 16
217	 14	74.3	10.3	 16
218	 14	70.3	9.8	 16
219	 14	87.3	10.8	 16
220	 14	117.0	23.2	 16
221	 14	102.8	19.0	 16
222	 14	105.3	35.6	 16
223	 14	266.5	40.2	 16
224	 14	91.8	15.4	 16
225	 14	89.3	12.0	 16
226	 14	94.8	15.1	 16
227	 14	82.3	13.2	 16
228	 14	132.8	48.5	 16
229	 14	94.0	14.7	 16
230	 14	73.0	12.3	 16
231	 14	216.3	21.2	 16
232	 14	222.3	23.2	 16
233	 14	336.3	35.2	 16
234	 14	143.3	16.9	 16
235	 14	414.3	39.6	 16
236	 14	254.0	65.6	 16
237	 14	2909.5	194.2	 16
238	 14	2770.3	357.9	 16
239	 14	518.0	76.0	 16
240	 14	152.8	22.8	 16
241	 14	637.3	89.7	 16
242	 14	522.3	97.8	 16
243	 14	109.3	19.8	 16
244	 14	85.0	17.5	 16
245	 14	78.0	13.2	 16
246	 14	109.0	18.0	 16
247	 14	78.8	10.0	 16
248	 14	91.8	32.6	 16
249	 14	71.0	11.7	 16
250	 14	73.0	9.6	 16
251	 14	76.0	13.8	 16
252	 14	75.8	15.1	 16
253	 14	72.8	15.3	 16
254	 14	85.0	11.5	 16
255	 14	89.0	15.4	 16
256	 14	131.3	15.8	 16
257	 14	102.8	15.0	 16
258	 14	92.8	14.7	 16
259	 14	73.3	7.4	 16
260	 14	65.5	13.5	 16
261	 14	71.3	8.9	 16
262	 14	89.5	17.6	 16
263	 14	137.5	15.8	 16
264	 14	88.3	15.2	 16
265	 14	108.0	17.6	 16
266	 14	82.3	16.3	 16
267	 14	349.0	27.0	 16
268	 14	100.3	15.5	 16
269	 14	268.3	35.5	 16
270	 14	135.0	45.7	 16
271	 14	92.0	18.6	 16
272	 14	105.0	14.4	 16
273	 14	105.5	21.0	 16
274	 14	85.5	9.2	 16
275	 14	91.0	16.8	 16
276	 14	142.3	24.3	 16
277	 14	80.5	15.8	 16
278	 14	82.5	17.6	 16
279	 14	80.5	14.0	 16
280	 14	69.5	8.4	 16
281	 14	74.0	12.8	 16
282	 14	115.8	15.1	 16
283	 14	169.8	22.8	 16
284	 14	63.3	9.5	 16
285	 14	81.8	10.9	 16
286	 14	238.0	31.3	 16
287	 14	102.5	19.8	 16
288	 14	93.8	18.2	 16
289	 14	107.8	14.6	 16
290	 14	76.8	12.4	 16
291	 14	77.5	10.1	 16
292	 14	98.5	18.6	 16
293	 14	84.5	10.9	 16
294	 14	101.8	19.7	 16
295	 14	151.0	15.1	 16
296	 14	147.8	14.7	 16
297	 14	82.8	13.5	 16
298	 14	91.0	12.8	 16
299	 14	134.8	27.8	 16
300	 14	93.0	16.4	 16
301	 14	153.5	22.8	 16
302	 14	87.0	12.4	 16
303	 14	89.8	11.9	 16
304	 14	151.0	21.3	 16
305	 14	93.0	13.3	 16
306	 14	100.8	15.6	 16
307	 14	129.0	17.6	 16
308	 14	93.0	23.2	 16
309	 14	190.5	28.5	 16
310	 14	171.0	17.0	 16
311	 14	123.5	15.8	 16
312	 14	79.3	11.5	 16
313	 14	88.8	11.9	 16
314	 14	89.3	17.2	 16
315	 14	80.3	12.4	 16
316	 14	91.8	13.0	 16
317	 14	101.5	18.9	 16
318	 14	77.5	10.5	 16
319	 14	94.8	12.9	 16
320	 14	89.0	12.3	 16
321	 14	123.5	18.7	 16
322	 14	133.0	14.3	 16
323	 14	220.5	28.1	 16
324	 14	115.8	21.2	 16
325	 14	430.5	29.8	 16
326	 14	135.3	26.2	 16
327	 14	97.3	11.5	 16
328	 14	91.0	15.0	 16
329	 14	93.5	10.8	 16
330	 14	93.5	14.6	 16
331	 14	151.0	33.8	 16
332	 14	102.5	14.9	 16
333	 14	88.3	18.8	 16
334	 14	78.3	12.6	 16
335	 14	72.3	9.8	 16
336	 14	75.0	10.8	 16
337	 14	82.5	14.0	 16
338	 14	96.8	18.5	 16
339	 14	386.3	37.6	 16
340	 14	189.8	23.8	 16
341	 14	146.5	20.9	 16
342	 14	90.8	17.7	 16
343	 14	75.5	9.3	 16
344	 14	72.3	10.6	 16
345	 14	79.5	14.5	 16
346	 14	92.3	14.7	 20
347	 14	70.5	13.6	 16
348	 14	104.3	15.5	 16
349	 14	147.0	28.1	 16
350	 14	239.5	52.7	 16
351	 14	160.0	22.5	 16
352	 14	85.3	13.8	 16
353	 14	219.3	47.3	 16
354	 14	85.8	12.9	 16
355	 14	171.5	28.6	 16
356	 14	259.3	32.8	 16
357	 14	289.0	44.4	 16
358	 14	128.3	22.2	 16
359	 14	82.0	17.7	 16
360	 14	92.3	15.9	 16
361	 14	175.5	24.1	 16
362	 14	96.3	16.5	 16
363	 14	73.3	12.1	 16
364	 14	78.3	14.4	 16
365	 14	83.3	16.9	 16
366	 14	92.5	14.5	 16
367	 14	146.0	24.3	 16
368	 14	75.0	9.0	 16
369	 14	90.8	17.0	 16
370	 14	160.3	25.8	 16
371	 14	187.8	29.1	 16
372	 14	247.3	24.5	 16
373	 14	140.3	20.7	 16
374	 14	64.3	7.5	 16
375	 14	105.5	16.5	 16
376	 14	90.8	16.5	 16
377	 14	253.3	39.8	 16
378	 14	98.0	17.5	 16
379	 14	151.8	20.0	 16
380	 14	165.8	25.1	 16
381	 14	63.3	11.2	 16
382	 14	94.3	14.2	 16
383	 14	130.0	21.5	 16
384	 14	130.5	21.8	 16
385	 14	83.3	13.0	 16
386	 14	80.5	10.8	 16
387	 14	92.3	14.8	 16
388	 14	108.3	19.0	 16
389	 14	85.0	13.6	 16
390	 14	90.0	22.3	 16
391	 14	89.0	15.9	 16
392	 14	79.8	7.6	 16
393	 14	89.8	15.2	 16
394	 14	202.5	25.6	 16
395	 14	84.0	19.1	 16
396	 14	127.8	14.3	 16
397	 14	228.3	37.2	 16
398	 14	116.5	21.3	 16
399	 14	95.5	14.0	 16
400	 14	123.3	18.6	 16
401	 14	99.8	15.7	 16
402	 14	92.0	15.4	 16
403	 14	92.0	15.8	 16
404	 14	81.8	15.7	 16
405	 14	71.3	11.7	 16
406	 14	176.3	23.2	 16
407	 14	203.8	29.2	 16
408	 14	74.0	10.1	 16
409	 14	82.8	11.9	 16
410	 14	94.0	14.6	 16
411	 14	91.3	9.6	 16
412	 14	99.5	15.1	 16
413	 14	104.5	15.0	 16
414	 14	74.3	10.6	 16
415	 14	131.3	20.3	 16
416	 14	78.3	16.2	 16
417	 14	92.0	17.3	 16
418	 14	141.8	20.7	 16
419	 14	151.8	76.9	 16
420	 14	87.0	13.5	 16
421	 14	75.5	8.9	 16
422	 14	80.3	18.7	 16
423	 14	86.3	9.1	 16
424	 14	98.3	14.3	 16
425	 14	92.8	13.0	 16
426	 14	76.3	12.2	 16
427	 14	101.0	12.6	 16
428	 14	108.3	16.2	 16
429	 14	122.0	13.7	 16
430	 14	88.3	11.9	 16
431	 14	155.8	30.9	 16
432	 14	131.3	19.5	 16
433	 14	166.3	22.4	 16
434	 14	219.8	21.5	 16
435	 14	92.0	13.4	 16
436	 14	76.0	14.8	 16
437	 14	97.5	13.4	 16
438	 14	258.3	34.7	 16
439	 14	176.3	36.1	 16
440	 14	82.5	10.1	 16
441	 14	81.0	11.4	 16
442	 14	114.5	17.3	 16
443	 14	95.3	15.9	 16
444	 14	85.5	14.5	 16
445	 14	69.5	6.0	 16
446	 14	82.5	10.5	 16
447	 14	77.3	9.4	 16
448	 14	84.5	16.5	 16
449	 14	75.0	10.3	 16
450	 14	81.5	14.6	 16
451	 14	83.5	11.7	 16
452	 14	74.5	10.2	 16
453	 14	72.3	10.4	 16
454	 14	79.8	11.1	 16
455	 14	85.3	13.5	 16
456	 14	80.0	15.9	 16
457	 14	75.3	17.6	 16
458	 14	124.8	19.5	 16
459	 14	76.0	13.9	 16
460	 14	100.5	16.3	 16
461	 14	90.3	13.4	 16
462	 14	126.3	23.8	 16
463	 14	90.3	15.3	 16
464	 14	85.5	17.7	 16
465	 14	85.0	14.8	 16
466	 14	95.0	14.0	 16
467	 14	87.3	12.6	 16
468	 14	79.3	16.2	 16
469	 14	68.5	14.1	 16
470	 14	114.5	24.0	 16
471	 14	120.5	32.8	 16
472	 14	72.5	12.3	 16
473	 14	125.5	19.3	 16
474	 14	104.0	13.0	 16
475	 14	68.8	13.4	 16
476	 14	91.3	20.0	 16
477	 14	69.0	14.2	 16
478	 14	68.3	12.1	 16
479	 14	79.8	18.9	 16
480	 14	5941.8	848.3	 16
481	 14	137.0	18.8	 16
482	 14	73.8	11.7	 16
483	 14	81.3	14.1	 16
484	 14	72.5	10.1	 16
485	 14	117.8	13.9	 16
486	 14	130.3	20.0	 16
487	 14	140.3	25.9	 16
488	 14	95.5	12.8	 16
489	 14	77.3	13.1	 20
490	 14	73.0	14.6	 16
491	 14	92.3	15.9	 16
492	 14	92.8	19.8	 16
493	 14	75.5	12.2	 16
494	 14	78.0	10.6	 16
495	 14	146.3	27.2	 16
496	 14	98.0	19.2	 16
497	 14	84.8	21.4	 16
498	 14	61.8	11.2	 16
499	 14	168.0	29.3	 16
500	 14	78.3	10.8	 16
501	 14	71.3	11.5	 16
502	 14	77.0	12.6	 16
503	 14	71.3	12.3	 16
504	 14	70.5	12.4	 16
505	 14	73.3	9.0	 16
506	 14	122.5	17.6	 16
507	 14	92.8	19.8	 16
508	 14	167.3	28.8	 16
509	 14	96.3	8.6	 16
510	 14	86.8	16.5	 16
511	 14	148.5	15.8	 16
512	 14	101.5	12.5	 16
513	 14	103.3	18.2	 16
514	 14	182.0	28.3	 16
515	 14	110.0	11.5	 16
516	 14	173.5	21.7	 16
517	 14	113.8	36.8	 16
518	 14	92.8	19.1	 16
519	 14	103.0	17.3	 16
520	 14	79.0	16.8	 16
521	 14	118.8	32.2	 16
522	 14	191.3	24.2	 16
523	 14	172.3	25.8	 16
524	 14	121.5	17.5	 16
525	 14	78.3	11.3	 16
526	 14	105.0	19.8	 16
527	 14	95.3	15.5	 16
528	 14	165.0	25.6	 16
529	 14	178.0	34.5	 16
530	 14	74.5	10.8	 16
531	 14	85.3	14.0	 16
532	 14	76.3	10.5	 16
533	 14	69.8	13.6	 16
534	 14	75.3	13.8	 16
535	 14	122.8	22.2	 16
536	 14	87.5	13.4	 16
537	 14	148.8	70.9	 16
538	 14	190.5	31.9	 16
539	 14	129.8	12.5	 16
540	 14	95.8	15.8	 16
541	 14	169.3	36.1	 16
542	 14	68.0	10.1	 16
543	 14	99.3	11.6	 16
544	 14	100.5	14.5	 16
545	 14	85.3	19.0	 16
546	 14	82.0	13.2	 16
547	 14	384.5	38.3	 16
548	 14	387.8	24.3	 16
549	 14	205.0	20.7	 16
550	 14	84.8	17.3	 16
551	 14	120.5	20.7	 16
552	 14	127.0	24.6	 16
553	 14	454.3	51.2	 16
554	 14	79.3	13.5	 16
555	 14	69.0	9.5	 16
556	 14	114.3	14.1	 16
557	 14	89.8	11.1	 16
558	 14	77.0	11.8	 16
559	 14	199.3	19.1	 16
560	 14	127.5	31.3	 16
561	 14	78.3	12.4	 16
562	 14	73.3	17.1	 16
563	 14	151.0	19.8	 16
564	 14	167.3	18.2	 16
565	 14	88.0	14.9	 16
566	 14	92.5	15.5	 16
567	 14	361.5	38.3	 16
568	 14	99.3	13.1	 16
569	 14	100.8	13.3	 16
570	 14	71.8	13.6	 16
571	 14	73.3	12.1	 16
572	 14	99.5	14.5	 16
573	 14	86.5	16.8	 16
574	 14	109.0	21.8	 16
575	 14	147.3	18.4	 16
576	 14	101.8	16.3	 16
577	 14	98.0	9.8	 16
578	 14	363.0	39.8	 16
579	 14	324.0	36.5	 16
580	 14	102.8	16.8	 16
581	 14	77.3	13.5	 16
582	 14	155.0	23.3	 16
583	 14	86.3	15.9	 16
584	 14	141.0	18.1	 16
585	 14	112.5	13.4	 16
586	 14	106.5	21.2	 16
587	 14	122.0	16.4	 16
588	 14	76.0	13.4	 16
589	 14	81.0	13.2	 16
590	 14	102.8	14.0	 16
591	 14	114.5	19.0	 16
592	 14	199.3	32.5	 16
593	 14	114.0	19.8	 16
594	 14	136.5	21.2	 16
595	 14	99.0	15.5	 16
596	 14	93.8	19.2	 16
597	 14	187.0	58.0	 16
598	 14	90.5	22.3	 16
599	 14	99.8	17.4	 16
600	 14	107.3	20.5	 16
601	 14	115.3	19.3	 16
602	 14	150.3	20.6	 16
603	 14	71.0	14.1	 16
604	 14	131.3	18.1	 16
605	 14	98.8	17.5	 16
606	 14	72.5	10.1	 16
607	 14	73.3	8.0	 16
608	 14	78.0	10.7	 16
609	 14	69.5	11.5	 16
610	 14	68.3	8.6	 16
611	 14	72.0	12.4	 16
612	 14	72.0	9.8	 16
613	 14	99.8	20.3	 16
614	 14	89.5	12.9	 16
615	 14	107.3	25.3	 16
616	 14	156.3	24.9	 16
617	 14	146.3	29.1	 16
618	 14	86.0	13.8	 16
619	 14	146.0	26.0	 16
620	 14	72.3	10.7	 16
621	 14	72.5	12.7	 16
622	 14	90.5	10.5	 16
623	 14	92.3	15.2	 16
624	 14	82.0	17.4	 16
625	 14	75.3	13.7	 16
626	 14	66.3	11.4	 16
627	 14	64.5	9.8	 16
628	 14	69.5	12.4	 16
629	 14	85.8	11.4	 16
630	 14	337.0	58.2	 16
631	 14	207.5	35.7	 20
632	 14	108.5	18.3	 16
633	 14	281.5	33.4	 16
634	 14	555.3	69.7	 16
635	 14	103.3	14.8	 16
636	 14	115.3	18.4	 16
637	 14	76.5	17.5	 16
638	 14	134.5	14.1	 16
639	 14	105.3	25.9	 16
640	 14	73.3	8.6	 16
641	 14	101.3	14.9	 16
642	 14	159.0	51.1	 16
643	 14	100.5	14.9	 16
644	 14	115.3	23.1	 16
645	 14	102.0	13.2	 16
646	 14	89.3	20.2	 16
647	 14	99.8	16.0	 16
648	 14	74.3	12.6	 16
649	 14	72.8	14.1	 16
650	 14	90.3	25.6	 16
651	 14	79.0	15.4	 16
652	 14	101.5	16.0	 16
653	 14	95.3	15.8	 16
654	 14	74.3	11.2	 16
655	 14	87.8	22.3	 16
656	 14	73.3	11.2	 16
657	 14	73.0	10.6	 16
658	 14	163.8	16.8	 16
659	 14	125.5	20.6	 16
660	 14	969.5	83.1	 16
661	 14	291.0	30.5	 16
662	 14	187.8	33.1	 16
663	 14	143.3	25.3	 16
664	 14	163.0	25.9	 16
665	 14	91.5	11.8	 16
666	 14	256.0	27.6	 16
667	 14	65.8	9.6	 16
668	 14	121.8	29.4	 16
669	 14	68.3	13.3	 16
670	 14	86.0	11.1	 16
671	 14	84.3	17.5	 16
672	 14	74.3	8.4	 16
673	 14	100.0	16.7	 16
674	 14	75.5	11.1	 16
675	 14	84.5	13.9	 16
676	 14	79.3	12.0	 16
677	 14	83.0	13.6	 16
678	 14	83.3	16.5	 16
679	 14	79.0	7.9	 16
680	 14	158.8	21.3	 16
681	 14	68.3	8.4	 16
682	 14	98.5	16.8	 16
683	 14	141.3	16.8	 16
684	 14	124.8	17.7	 16
685	 14	103.5	15.0	 16
686	 14	76.8	9.8	 16
687	 14	86.3	15.2	 16
688	 14	87.3	13.2	 16
689	 14	132.5	19.7	 16
690	 14	94.0	12.6	 16
691	 14	165.3	17.8	 16
692	 14	136.3	23.0	 16
693	 14	181.5	19.6	 16
694	 14	79.5	14.4	 16
695	 14	75.5	14.9	 16
696	 14	71.0	11.3	 16
697	 14	123.5	15.2	 16
698	 14	307.3	34.1	 16
699	 14	453.3	31.7	 16
700	 14	116.8	13.0	 16
701	 14	141.3	16.5	 16
702	 14	445.5	33.8	 16
703	 14	90.3	12.9	 16
704	 14	158.0	23.6	 16
705	 14	155.8	18.0	 16
706	 14	155.8	19.8	 16
707	 14	237.5	28.5	 16
708	 14	102.3	14.5	 16
709	 14	90.0	12.4	 16
710	 14	139.0	26.6	 16
711	 14	6560.0	599.6	 16
  0	 15	106.5	13.7	 16
  1	 15	102.3	15.7	 16
  2	 15	84.5	11.2	 16
  3	 15	92.8	16.1	 16
  4	 15	142.5	18.7	 16
  5	 15	87.3	20.6	 16
  6	 15	124.0	23.0	 16
  7	 15	282.8	38.7	 16
  8	 15	126.5	136.3	 16
  9	 15	124.3	17.0	 16
 10	 15	102.3	18.9	 16
 11	 15	95.5	16.1	 16
 12	 15	303.8	32.3	 16
 13	 15	99.3	55.9	 16
 14	 15	87.3	14.0	 16
 15	 15	106.0	19.4	 16
 16	 15	223.0	32.5	 16
 17	 15	183.3	23.4	 16
 18	 15	158.0	20.9	 16
 19	 15	243.3	28.0	 16
 20	 15	142.0	19.2	 16
 21	 15	2069.0	4950.7	 16
 22	 15	418.0	985.8	 16
 23	 15	143.3	20.5	 16
 24	 15	333.8	47.3	 16
 25	 15	148.8	27.1	 16
 26	 15	103.0	11.7	 16
 27	 15	75.3	13.5	 16
 28	 15	356.3	42.7	 16
 29	 15	688.5	56.2	 16
 30	 15	105.0	13.4	 16
 31	 15	237.5	27.7	 16
 32	 15	85.3	12.5	 16
 33	 15	827.8	102.3	 16
 34	 15	105.0	17.0	 16
 35	 15	121.3	24.3	 16
 36	 15	87.3	15.4	 16
 37	 15	108.5	16.5	 16
 38	 15	101.3	20.3	 16
 39	 15	75.3	11.9	 16
 40	 15	75.3	11.5	 16
 41	 15	170.5	29.2	 16
 42	 15	90.0	14.5	 16
 43	 15	117.3	19.0	 16
 44	 15	177.5	27.8	 16
 45	 15	116.0	14.2	 16
 46	 15	133.5	18.3	 16
 47	 15	125.8	14.8	 16
 48	 15	907.8	45.5	 16
 49	 15	290.5	36.9	 16
 50	 15	397.3	44.1	 16
 51	 15	185.5	23.7	 16
 52	 15	135.8	19.4	 16
 53	 15	183.0	18.6	 16
 54	 15	79.5	13.7	 16
 55	 15	90.8	16.0	 16
 56	 15	108.8	21.4	 16
 57	 15	112.8	19.8	 16
 58	 15	868.0	69.6	 16
 59	 15	271.8	35.2	 16
 60	 15	89.0	15.1	 16
 61	 15	128.8	19.0	 16
 62	 15	332.8	36.1	 16
 63	 15	142.8	62.3	 16
 64	 15	158.3	19.3	 16
 65	 15	172.5	25.6	 16
 66	 15	85.5	16.0	 16
 67	 15	113.5	14.4	 16
 68	 15	299.0	29.6	 16
 69	 15	135.8	27.8	 16
 70	 15	140.3	22.5	 16
 71	 15	123.8	17.0	 20
 72	 15	131.0	20.6	 16
 73	 15	244.0	26.6	 16
 74	 15	800.5	117.2	 16
 75	 15	71.8	8.2	 16
 76	 15	539.0	96.9	 16
 77	 15	97.5	33.4	 16
 78	 15	71.5	11.1	 16
 79	 15	188.0	30.7	 16
 80	 15	73.3	11.0	 16
 81	 15	189.3	25.7	 16
 82	 15	75.3	18.3	 16
 83	 15	72.0	15.5	 16
 84	 15	97.3	18.9	 16
 85	 15	422.3	69.1	 16
 86	 15	215.8	38.5	 16
 87	 15	130.8	18.3	 16
 88	 15	96.5	15.8	 16
 89	 15	268.8	42.6	 16
 90	 15	146.0	22.4	 16
 91	 15	219.3	31.3	 16
 92	 15	162.5	27.9	 16
 93	 15	235.5	31.2	 16
 94	 15	637.0	86.2	 16
 95	 15	411.0	52.8	 16
 96	 15	252.3	34.9	 16
 97	 15	83.3	13.3	 16
 98	 15	129.3	20.5	 16
 99	 15	101.5	17.0	 16
100	 15	187.0	200.6	 16
101	 15	3960.5	619.8	 16
102	 15	221.8	35.3	 16
103	 15	107.8	20.8	 16
104	 15	1639.3	314.7	 16
105	 15	273.0	42.3	 16
106	 15	107.0	16.7	 16
107	 15	64.3	13.6	 16
108	 15	171.3	20.0	 16
109	 15	156.5	23.8	 16
110	 15	98.5	20.5	 16
111	 15	171.5	25.0	 16
112	 15	154.5	23.2	 16
113	 15	121.3	20.8	 16
114	 15	252.3	26.7	 16
115	 15	314.3	32.0	 16
116	 15	256.5	25.1	 16
117	 15	102.8	24.0	 16
118	 15	297.5	49.4	 16
119	 15	91.3	19.5	 16
120	 15	160.3	30.2	 16
121	 15	205.5	33.4	 16
122	 15	98.8	24.2	 16
123	 15	202.8	31.2	 16
124	 15	142.3	30.7	 16
125	 15	96.5	16.4	 16
126	 15	277.5	43.9	 16
127	 15	86.0	17.3	 16
128	 15	105.8	15.6	 16
129	 15	70.0	11.8	 16
130	 15	92.5	15.7	 16
131	 15	600.8	69.8	 16
132	 15	211.0	29.8	 16
133	 15	95.0	19.2	 16
134	 15	175.8	17.1	 16
135	 15	73.5	9.3	 16
136	 15	117.5	24.2	 16
137	 15	1341.3	116.7	 16
138	 15	1318.0	176.2	 16
139	 15	178.3	26.7	 16
140	 15	127.3	19.6	 16
141	 15	112.3	51.5	 16
142	 15	108.3	19.4	 16
143	 15	143.0	21.0	 16
144	 15	459.8	56.1	 16
145	 15	266.8	36.3	 16
146	 15	170.8	22.3	 16
147	 15	101.0	119.1	 16
148	 15	353.0	29.7	 16
149	 15	121.5	15.6	 16
150	 15	188.8	25.2	 16
151	 15	380.5	41.3	 16
152	 15	174.0	19.7	 16
153	 15	167.5	24.8	 16
154	 15	154.8	25.0	 16
155	 15	84.0	13.8	 16
156	 15	102.5	14.3	 16
157	 15	195.5	20.7	 16
158	 15	163.0	24.6	 16
159	 15	192.0	16.1	 16
160	 15	316.8	38.3	 16
161	 15	990.0	104.8	 16
162	 15	116.5	15.4	 16
163	 15	145.3	19.2	 16
164	 15	84.0	12.7	 16
165	 15	84.8	10.3	 16
166	 15	100.8	21.4	 16
167	 15	188.8	30.1	 16
168	 15	143.8	24.5	 16
169	 15	137.8	26.8	 16
170	 15	102.0	16.0	 16
171	 15	85.8	9.8	 16
172	 15	99.5	17.7	 16
173	 15	83.5	13.3	 16
174	 15	80.5	14.4	 16
175	 15	122.0	33.3	 16
176	 15	115.3	30.8	 16
177	 15	142.5	27.1	 16
178	 15	442.0	51.7	 16
179	 15	119.8	17.4	 16
180	 15	114.0	10.2	 16
181	 15	89.5	12.6	 16
182	 15	475.0	34.8	 16
183	 15	96.3	14.8	 16
184	 15	106.3	12.8	 16
185	 15	93.8	14.8	 16
186	 15	114.0	18.7	 16
187	 15	74.3	10.9	 16
188	 15	361.3	43.1	 16
189	 15	341.0	41.9	 16
190	 15	283.0	36.8	 16
191	 15	79.0	15.7	 16
192	 15	125.8	16.8	 16
193	 15	130.0	16.8	 16
194	 15	186.0	33.3	 16
195	 15	139.3	21.6	 16
196	 15	94.0	14.0	 16
197	 15	359.8	61.7	 16
198	 15	82.3	11.0	 16
199	 15	66.8	12.2	 16
200	 15	74.3	8.5	 16
201	 15	252.3	24.1	 16
202	 15	155.0	21.5	 16
203	 15	134.0	19.7	 16
204	 15	102.3	18.9	 16
205	 15	189.0	25.7	 16
206	 15	287.3	27.5	 16
207	 15	112.8	17.5	 16
208	 15	154.8	24.8	 16
209	 15	153.0	25.9	 16
210	 15	163.8	50.9	 16
211	 15	112.3	15.4	 16
212	 15	123.3	20.2	 16
213	 15	78.0	13.8	 20
214	 15	121.5	20.3	 16
215	 15	96.5	12.0	 16
216	 15	2229.0	548.4	 16
217	 15	135.5	25.4	 16
218	 15	1702.3	378.8	 16
219	 15	247.8	52.5	 16
220	 15	139.8	20.5	 16
221	 15	139.3	12.4	 16
222	 15	116.5	20.1	 16
223	 15	116.5	14.4	 16
224	 15	80.0	15.1	 16
225	 15	116.3	11.6	 16
226	 15	198.5	46.4	 16
227	 15	83.5	13.9	 16
228	 15	98.3	21.7	 16
229	 15	461.5	75.2	 16
230	 15	131.5	18.3	 16
231	 15	80.3	9.6	 16
232	 15	179.5	32.9	 16
233	 15	72.3	12.0	 16
234	 15	162.3	25.8	 16
235	 15	411.3	57.8	 16
236	 15	615.5	57.9	 16
237	 15	342.3	45.0	 16
238	 15	409.3	73.2	 16
239	 15	123.0	15.0	 16
240	 15	106.0	21.0	 16
241	 15	241.3	32.5	 16
242	 15	739.3	124.3	 16
243	 15	89.5	13.7	 16
244	 15	96.5	14.4	 16
245	 15	107.3	14.8	 16
246	 15	175.8	31.1	 16
247	 15	86.8	11.2	 16
248	 15	220.5	37.1	 16
249	 15	739.3	103.1	 16
250	 15	94.3	17.9	 16
251	 15	79.0	10.5	 16
252	 15	230.5	36.8	 16
253	 15	159.8	29.1	 16
254	 15	812.5	63.1	 16
255	 15	175.3	76.8	 16
256	 15	157.3	20.7	 16
257	 15	372.3	49.1	 16
258	 15	78.8	11.8	 16
259	 15	77.5	10.1	 16
260	 15	117.3	16.6	 16
261	 15	101.0	15.9	 16
262	 15	154.3	19.9	 16
263	 15	148.0	13.5	 16
264	 15	147.5	14.6	 16
265	 15	102.8	12.1	 16
266	 15	93.3	13.7	 16
267	 15	130.5	20.2	 16
268	 15	178.3	22.6	 16
269	 15	159.8	20.6	 16
270	 15	79.3	17.0	 16
271	 15	88.5	13.1	 16
272	 15	184.0	28.3	 16
273	 15	89.5	14.5	 16
274	 15	247.5	24.0	 16
275	 15	221.0	26.9	 16
276	 15	150.8	19.7	 16
277	 15	110.0	17.3	 16
278	 15	91.3	17.6	 16
279	 15	227.5	85.7	 16
280	 15	257.0	26.7	 16
281	 15	104.0	13.5	 16
282	 15	215.3	30.4	 16
283	 15	90.8	12.0	 16
284	 15	78.0	12.0	 16
285	 15	145.3	18.7	 16
286	 15	122.8	19.6	 16
287	 15	263.3	28.7	 16
288	 15	959.8	95.0	 16
289	 15	96.5	17.8	 16
290	 15	172.0	15.5	 16
291	 15	104.0	18.0	 16
292	 15	540.5	56.9	 16
293	 15	354.0	32.5	 16
294	 15	140.3	22.6	 16
295	 15	90.0	13.2	 16
296	 15	207.5	26.5	 16
297	 15	746.5	74.8	 16
298	 15	142.3	26.0	 16
299	 15	133.3	19.2	 16
300	 15	84.5	12.4	 16
301	 15	116.8	15.2	 16
302	 15	95.0	11.8	 16
303	 15	77.5	10.7	 16
304	 15	349.5	38.5	 16
305	 15	83.3	13.4	 16
306	 15	140.5	16.0	 16
307	 15	137.5	16.0	 16
308	 15	158.5	25.3	 16
309	 15	124.5	17.9	 16
310	 15	344.3	27.0	 16
311	 15	260.3	28.6	 16
312	 15	154.8	24.5	 16
313	 15	90.3	18.7	 16
314	 15	132.8	20.0	 16
315	 15	190.8	30.8	 16
316	 15	762.3	48.1	 16
317	 15	175.5	24.3	 16
318	 15	108.5	19.0	 16
319	 15	225.8	31.7	 16
320	 15	132.5	18.6	 16
321	 15	184.5	24.4	 16
322	 15	238.3	29.6	 16
323	 15	134.8	18.6	 16
324	 15	590.8	65.9	 16
325	 15	118.5	17.8	 16
326	 15	127.3	20.1	 16
327	 15	133.3	16.6	 16
328	 15	80.0	15.0	 16
329	 15	79.5	11.4	 16
330	 15	899.8	106.6	 16
331	 15	285.0	62.3	 16
332	 15	369.8	29.0	 16
333	 15	309.5	48.7	 16
334	 15	86.8	11.9	 16
335	 15	72.3	12.6	 16
336	 15	79.3	9.1	 16
337	 15	457.5	41.6	 16
338	 15	375.8	58.6	 16
339	 15	323.0	20.3	 16
340	 15	232.3	41.7	 16
341	 15	133.8	15.0	 16
342	 15	89.5	12.3	 16
343	 15	78.5	12.9	 16
344	 15	112.3	19.1	 16
345	 15	102.3	13.0	 16
346	 15	138.3	21.7	 16
347	 15	66.0	10.3	 16
348	 15	289.5	51.6	 16
349	 15	109.3	26.8	 16
350	 15	160.8	31.9	 16
351	 15	158.3	51.2	 16
352	 15	78.8	10.6	 16
353	 15	152.0	15.7	 16
354	 15	77.5	9.7	 16
355	 15	235.0	21.1	 16
356	 15	651.5	50.2	 20
357	 15	285.0	25.3	 16
358	 15	281.0	41.8	 16
359	 15	293.0	62.6	 16
360	 15	76.5	10.4	 16
361	 15	126.3	15.4	 16
362	 15	156.5	26.6	 16
363	 15	100.0	14.9	 16
364	 15	143.0	20.9	 16
365	 15	90.3	15.2	 16
366	 15	119.0	18.5	 16
367	 15	156.0	17.2	 16
368	 15	85.3	15.1	 16
369	 15	82.8	11.0	 16
370	 15	86.5	15.6	 16
371	 15	90.5	15.5	 16
372	 15	146.8	22.3	 16
373	 15	394.5	54.7	 16
374	 15	85.0	11.0	 16
375	 15	284.3	43.2	 16
376	 15	196.5	15.7	 16
377	 15	129.5	32.6	 16
378	 15	108.8	19.5	 16
379	 15	185.8	26.9	 16
380	 15	87.3	16.6	 16
381	 15	90.3	11.5	 16
382	 15	71.3	9.5	 16
383	 15	124.0	18.5	 16
384	 15	101.3	30.2	 16
385	 15	444.0	63.8	 16
386	 15	104.5	18.3	 16
387	 15	404.8	38.0	 16
388	 15	227.8	24.9	 16
389	 15	213.5	28.4	 16
390	 15	78.0	13.1	 16
391	 15	87.0	8.1	 16
392	 15	109.5	14.5	 16
393	 15	430.5	45.5	 16
394	 15	342.5	39.3	 16
395	 15	152.0	17.5	 16
396	 15	86.3	11.5	 16
397	 15	107.0	18.9	 16
398	 15	95.8	17.5	 16
399	 15	101.5	14.9	 16
400	 15	182.8	29.3	 16
401	 15	128.3	19.7	 16
402	 15	133.8	22.0	 16
403	 15	102.0	12.7	 16
404	 15	1609.0	145.1	 16
405	 15	250.0	24.5	 16
406	 15	121.8	31.9	 16
407	 15	770.5	71.3	 16
408	 15	193.5	29.7	 16
409	 15	90.0	11.6	 16
410	 15	161.5	23.6	 16
411	 15	177.8	26.1	 16
412	 15	76.0	13.2	 16
413	 15	299.8	40.5	 16
414	 15	100.8	9.8	 16
415	 15	255.8	45.6	 16
416	 15	174.3	20.1	 16
417	 15	477.0	45.0	 16
418	 15	177.3	25.1	 16
419	 15	156.0	21.9	 16
420	 15	74.3	9.2	 16
421	 15	87.0	11.5	 16
422	 15	98.0	16.3	 16
423	 15	181.0	25.8	 16
424	 15	138.8	21.6	 16
425	 15	85.5	17.0	 16
426	 15	78.8	9.0	 16
427	 15	188.8	29.8	 16
428	 15	78.3	16.3	 16
429	 15	85.0	13.5	 16
430	 15	85.8	16.3	 16
431	 15	6990.0	871.7	 16
432	 15	104.8	19.3	 16
433	 15	100.5	12.0	 16
434	 15	416.8	46.6	 16
435	 15	283.5	47.5	 16
436	 15	130.5	16.0	 16
437	 15	321.5	36.2	 16
438	 15	214.3	35.6	 16
439	 15	127.3	18.5	 16
440	 15	7701.3	732.7	 16
441	 15	324.5	40.9	 16
442	 15	80.5	10.3	 16
443	 15	228.0	26.4	 16
444	 15	310.5	33.5	 16
445	 15	305.5	35.6	 16
446	 15	276.3	29.0	 16
447	 15	277.0	16.7	 16
448	 15	284.3	23.9	 16
449	 15	312.5	44.8	 16
450	 15	285.3	46.5	 16
451	 15	818.8	170.1	 16
452	 15	82.3	12.2	 16
453	 15	241.0	19.3	 16
454	 15	359.3	44.0	 16
455	 15	108.8	15.4	 16
456	 15	71.0	10.8	 16
457	 15	133.0	21.8	 16
458	 15	318.5	31.6	 16
459	 15	129.3	17.9	 16
460	 15	97.8	17.5	 16
461	 15	123.8	16.9	 16
462	 15	84.0	13.5	 16
463	 15	73.3	10.6	 16
464	 15	111.8	19.5	 16
465	 15	105.0	29.1	 16
466	 15	88.8	13.4	 16
467	 15	193.3	32.1	 16
468	 15	188.3	21.1	 16
469	 15	280.8	35.2	 16
470	 15	110.8	15.5	 16
471	 15	232.8	36.5	 16
472	 15	87.3	14.2	 16
473	 15	109.0	14.3	 16
474	 15	146.5	19.8	 16
475	 15	118.3	15.0	 16
476	 15	86.3	11.7	 16
477	 15	215.3	29.7	 16
478	 15	644.3	89.7	 16
479	 15	140.0	14.3	 16
480	 15	78.5	14.2	 16
481	 15	238.3	30.6	 16
482	 15	82.3	14.4	 16
483	 15	75.0	12.2	 16
484	 15	95.3	16.5	 16
485	 15	77.3	11.6	 16
486	 15	118.3	18.8	 16
487	 15	116.3	24.4	 16
488	 15	109.5	13.6	 16
489	 15	96.8	16.7	 16
490	 15	93.0	11.7	 16
491	 15	72.5	8.8	 16
492	 15	317.0	38.0	 16
493	 15	146.0	21.8	 16
494	 15	94.3	54.1	 16
495	 15	110.5	49.9	 16
496	 15	404.3	54.5	 16
497	 15	66.3	10.5	 16
498	 15	72.0	12.1	 20
499	 15	73.8	13.0	 16
500	 15	76.5	12.4	 16
501	 15	81.5	12.8	 16
502	 15	85.3	15.2	 16
503	 15	292.5	52.3	 16
504	 15	126.0	23.5	 16
505	 15	312.8	40.9	 16
506	 15	91.3	8.5	 16
507	 15	603.3	98.3	 16
508	 15	166.8	26.4	 16
509	 15	92.3	13.7	 16
510	 15	99.3	16.9	 16
511	 15	122.0	17.2	 16
512	 15	75.8	12.3	 16
513	 15	96.5	13.6	 16
514	 15	86.8	17.5	 16
515	 15	108.0	20.9	 16
516	 15	119.5	16.1	 16
517	 15	106.5	12.1	 16
518	 15	122.5	20.1	 16
519	 15	102.5	18.2	 16
520	 15	82.8	18.1	 16
521	 15	75.3	11.1	 16
522	 15	93.5	11.4	 16
523	 15	335.0	85.2	 16
524	 15	75.5	23.0	 16
525	 15	367.8	66.3	 16
526	 15	204.8	34.2	 16
527	 15	97.5	14.6	 16
528	 15	156.3	16.4	 16
529	 15	108.5	17.6	 16
530	 15	150.0	19.6	 16
531	 15	226.0	36.8	 16
532	 15	81.3	10.9	 16
533	 15	84.5	11.3	 16
534	 15	81.8	11.3	 16
535	 15	389.0	49.2	 16
536	 15	136.0	17.8	 16
537	 15	291.0	31.5	 16
538	 15	233.3	25.5	 16
539	 15	118.5	48.9	 16
540	 15	894.3	179.8	 16
541	 15	75.0	11.6	 16
542	 15	99.3	18.7	 16
543	 15	99.3	17.9	 16
544	 15	562.8	48.1	 16
545	 15	194.3	19.3	 16
546	 15	90.3	15.2	 16
547	 15	322.5	26.8	 16
548	 15	144.0	20.4	 16
549	 15	75.5	13.0	 16
550	 15	79.5	8.6	 16
551	 15	80.3	9.2	 16
552	 15	176.8	32.5	 16
553	 15	295.3	43.7	 16
554	 15	142.5	25.4	 16
555	 15	100.0	18.8	 16
556	 15	972.8	61.5	 16
557	 15	310.0	27.1	 16
558	 15	81.0	13.8	 16
559	 15	224.0	24.8	 16
560	 15	69.8	10.9	 16
561	 15	219.0	32.9	 16
562	 15	107.0	14.5	 16
563	 15	127.5	15.7	 16
564	 15	102.3	14.6	 16
565	 15	136.3	24.5	 16
566	 15	288.0	31.5	 16
567	 15	214.3	24.6	 16
568	 15	207.8	35.3	 16
569	 15	200.8	29.4	 16
570	 15	297.8	30.2	 16
571	 15	116.8	17.5	 16
572	 15	133.0	17.7	 16
573	 15	659.5	108.7	 16
574	 15	76.8	12.7	 16
575	 15	88.3	16.9	 16
576	 15	186.5	25.9	 16
577	 15	332.0	80.5	 16
578	 15	102.5	20.9	 16
579	 15	132.5	19.1	 16
580	 15	246.8	21.5	 16
581	 15	114.0	17.0	 16
582	 15	112.5	16.6	 16
583	 15	88.3	9.6	 16
584	 15	124.0	21.3	 16
585	 15	123.8	13.6	 16
586	 15	778.5	152.5	 16
587	 15	113.3	13.1	 16
588	 15	119.3	16.4	 16
589	 15	80.8	12.8	 16
590	 15	103.5	26.6	 16
591	 15	132.3	20.2	 16
592	 15	233.0	43.2	 16
593	 15	180.5	28.8	 16
594	 15	89.3	17.4	 16
595	 15	171.0	21.3	 16
596	 15	141.3	25.1	 16
597	 15	141.5	23.9	 16
598	 15	118.3	14.6	 16
599	 15	169.8	24.4	 16
600	 15	474.0	77.4	 16
601	 15	346.3	40.2	 16
602	 15	215.0	17.3	 16
603	 15	76.5	18.1	 16
604	 15	115.5	16.3	 16
605	 15	224.8	28.8	 16
606	 15	114.3	17.6	 16
607	 15	614.0	81.0	 16
608	 15	458.3	57.6	 16
609	 15	100.3	16.5	 16
610	 15	83.0	17.2	 16
611	 15	80.5	12.1	 16
612	 15	91.0	19.6	 16
613	 15	199.5	19.5	 16
614	 15	191.5	23.6	 16
615	 15	106.0	12.9	 16
616	 15	162.3	27.5	 16
617	 15	325.3	32.7	 16
618	 15	96.0	15.1	 16
619	 15	194.5	21.0	 16
620	 15	246.3	22.3	 16
621	 15	140.0	20.4	 16
622	 15	1810.8	227.1	 16
623	 15	379.5	42.0	 16
624	 15	74.3	13.1	 16
625	 15	191.0	27.2	 16
626	 15	83.3	17.8	 16
627	 15	115.8	15.6	 16
628	 15	128.3	17.3	 16
629	 15	145.0	72.6	 16
630	 15	199.8	24.5	 16
631	 15	135.3	20.9	 16
632	 15	166.0	27.7	 16
633	 15	317.8	33.8	 16
634	 15	293.0	26.1	 16
635	 15	154.5	24.4	 16
636	 15	173.0	19.0	 16
637	 15	132.0	16.8	 16
638	 15	233.0	36.9	 16
639	 15	141.8	56.1	 16
640	 15	128.3	17.1	 16
641	 15	186.5	22.7	 20
642	 15	118.8	14.6	 16
643	 15	292.3	43.1	 16
644	 15	116.8	13.2	 16
645	 15	169.8	22.9	 16
646	 15	154.8	21.2	 16
647	 15	85.3	12.9	 16
648	 15	168.3	19.7	 16
649	 15	120.5	19.7	 16
650	 15	69.0	11.5	 16
651	 15	68.8	13.5	 16
652	 15	83.5	14.2	 16
653	 15	144.3	25.8	 16
654	 15	78.3	11.3	 16
655	 15	60.3	6.6	 16
656	 15	2289.0	128.4	 16
657	 15	86.5	14.5	 16
658	 15	95.0	11.9	 16
659	 15	114.0	20.7	 16
660	 15	422.0	42.6	 16
661	 15	100.3	16.1	 16
662	 15	2510.3	323.3	 16
663	 15	102.8	19.5	 16
664	 15	100.3	14.6	 16
665	 15	173.8	28.3	 16
666	 15	75.5	16.4	 16
667	 15	73.5	13.0	 16
668	 15	97.5	12.8	 16
669	 15	73.0	10.7	 16
670	 15	111.0	47.2	 16
671	 15	174.8	27.4	 16
672	 15	111.8	22.1	 16
673	 15	182.3	29.6	 16
674	 15	116.5	19.4	 16
675	 15	2740.3	395.7	 16
676	 15	141.5	19.0	 16
677	 15	108.0	21.2	 16
678	 15	174.8	28.7	 16
679	 15	101.0	14.9	 16
680	 15	81.3	15.9	 16
681	 15	75.3	12.5	 16
682	 15	87.0	18.2	 16
683	 15	228.3	30.5	 16
684	 15	180.5	17.5	 16
685	 15	168.5	19.2	 16
686	 15	679.5	59.7	 16
687	 15	100.0	18.0	 16
688	 15	202.5	30.4	 16
689	 15	79.3	13.5	 16
690	 15	274.5	55.8	 16
691	 15	109.3	16.0	 16
692	 15	3703.3	758.9	 16
693	 15	81.0	15.1	 16
694	 15	177.8	22.0	 16
695	 15	82.8	12.2	 16
696	 15	96.3	22.0	 16
697	 15	123.0	14.3	 16
698	 15	121.3	25.1	 16
699	 15	80.8	18.9	 16
700	 15	81.3	10.8	 16
701	 15	119.5	15.2	 16
702	 15	204.0	20.3	 16
703	 15	73.3	13.2	 16
704	 15	232.0	27.7	 16
705	 15	254.5	30.7	 16
706	 15	118.5	17.2	 16
707	 15	117.5	15.3	 16
708	 15	356.5	38.3	 16
709	 15	78.3	11.6	 16
710	 15	2237.5	238.2	 16
711	 15	96.3	15.0	 16
  0	 16	5168.8	517.6	 16
  1	 16	99.0	18.2	 16
  2	 16	83.0	14.7	 16
  3	 16	74.3	18.6	 16
  4	 16	90.0	17.4	 16
  5	 16	97.8	10.6	 16
  6	 16	110.3	16.1	 16
  7	 16	90.8	14.5	 16
  8	 16	80.8	11.1	 16
  9	 16	88.5	11.8	 16
 10	 16	68.3	9.1	 16
 11	 16	71.0	9.6	 16
 12	 16	135.8	17.6	 16
 13	 16	74.3	8.4	 16
 14	 16	80.0	11.3	 16
 15	 16	79.0	11.0	 16
 16	 16	255.3	46.0	 16
 17	 16	141.0	18.5	 16
 18	 16	85.5	14.1	 16
 19	 16	120.3	19.8	 16
 20	 16	108.0	20.3	 16
 21	 16	73.8	11.5	 16
 22	 16	87.8	15.9	 16
 23	 16	95.0	16.6	 16
 24	 16	136.8	17.6	 16
 25	 16	93.8	11.9	 16
 26	 16	91.5	30.5	 16
 27	 16	84.5	18.5	 16
 28	 16	138.0	21.6	 16
 29	 16	174.8	30.1	 16
 30	 16	110.0	18.1	 16
 31	 16	187.3	29.7	 16
 32	 16	84.3	15.4	 16
 33	 16	87.0	12.5	 16
 34	 16	92.3	10.7	 16
 35	 16	117.0	18.6	 16
 36	 16	89.3	17.8	 16
 37	 16	74.5	11.5	 16
 38	 16	72.5	10.0	 16
 39	 16	80.5	14.6	 16
 40	 16	109.8	63.4	 16
 41	 16	105.0	19.0	 16
 42	 16	86.3	11.4	 16
 43	 16	103.0	11.5	 16
 44	 16	188.5	24.3	 16
 45	 16	127.3	22.7	 16
 46	 16	97.8	57.8	 16
 47	 16	111.3	15.8	 16
 48	 16	584.0	45.6	 16
 49	 16	158.0	23.9	 16
 50	 16	109.8	20.8	 16
 51	 16	220.8	23.3	 16
 52	 16	170.5	21.9	 16
 53	 16	104.3	15.5	 16
 54	 16	88.0	27.4	 16
 55	 16	90.0	22.8	 16
 56	 16	116.0	14.4	 16
 57	 16	108.3	23.2	 12
 58	 16	350.5	56.2	 16
 59	 16	118.0	12.5	 16
 60	 16	85.0	13.5	 16
 61	 16	86.3	12.7	 16
 62	 16	126.3	18.5	 16
 63	 16	72.3	8.2	 16
 64	 16	211.5	16.1	 16
 65	 16	88.3	10.4	 16
 66	 16	80.8	11.4	 16
 67	 16	146.0	23.0	 16
 68	 16	168.5	22.3	 16
 69	 16	240.0	33.7	 16
 70	 16	229.0	25.7	 16
 71	 16	118.3	9.9	 16
 72	 16	451.3	33.0	 16
 73	 16	323.5	34.8	 16
 74	 16	1560.5	101.6	 16
 75	 16	92.3	17.4	 16
 76	 16	265.3	34.1	 16
 77	 16	112.5	11.1	 16
 78	 16	76.0	18.4	 16
 79	 16	82.5	11.5	 16
 80	 16	79.0	14.7	 20
 81	 16	163.5	25.0	 16
 82	 16	79.0	15.6	 16
 83	 16	84.0	14.5	 16
 84	 16	73.3	11.4	 16
 85	 16	88.3	17.1	 16
 86	 16	103.3	14.1	 16
 87	 16	75.3	12.0	 16
 88	 16	92.5	15.1	 16
 89	 16	101.0	14.8	 16
 90	 16	114.0	13.5	 16
 91	 16	118.5	22.6	 16
 92	 16	101.3	11.5	 16
 93	 16	79.8	12.2	 16
 94	 16	108.8	18.8	 16
 95	 16	173.5	25.8	 16
 96	 16	142.5	21.8	 16
 97	 16	81.3	12.0	 16
 98	 16	108.0	17.6	 16
 99	 16	97.3	28.5	 16
100	 16	96.0	19.0	 16
101	 16	763.3	180.0	 16
102	 16	83.0	9.4	 16
103	 16	79.0	11.8	 16
104	 16	231.0	33.3	 16
105	 16	234.8	28.5	 16
106	 16	94.0	13.3	 16
107	 16	69.3	12.5	 16
108	 16	162.8	26.3	 16
109	 16	81.3	10.6	 16
110	 16	92.8	19.0	 16
111	 16	145.3	14.6	 16
112	 16	138.3	34.5	 16
113	 16	143.3	25.3	 16
114	 16	173.8	21.0	 16
115	 16	232.0	27.2	 16
116	 16	137.8	24.5	 16
117	 16	190.0	21.4	 16
118	 16	261.3	36.5	 16
119	 16	77.5	16.6	 16
120	 16	82.3	12.1	 16
121	 16	157.0	18.7	 16
122	 16	86.0	14.8	 16
123	 16	99.5	15.2	 16
124	 16	98.5	13.9	 16
125	 16	77.8	7.2	 16
126	 16	105.0	14.9	 16
127	 16	73.8	11.1	 16
128	 16	90.5	12.0	 16
129	 16	78.0	11.9	 16
130	 16	95.5	11.7	 16
131	 16	133.8	20.8	 16
132	 16	99.5	20.2	 16
133	 16	97.0	29.3	 16
134	 16	78.0	8.5	 16
135	 16	71.0	12.7	 16
136	 16	90.8	69.4	 16
137	 16	441.0	57.4	 16
138	 16	181.3	23.8	 16
139	 16	100.3	13.5	 16
140	 16	81.3	14.4	 16
141	 16	86.3	12.7	 16
142	 16	68.8	8.2	 16
143	 16	187.8	21.7	 16
144	 16	464.0	32.4	 16
145	 16	186.3	24.0	 16
146	 16	100.0	13.7	 12
147	 16	86.0	18.8	 16
148	 16	613.0	55.8	 16
149	 16	202.5	23.5	 16
150	 16	158.3	43.7	 16
151	 16	163.8	18.7	 16
152	 16	72.3	10.2	 16
153	 16	90.3	10.8	 16
154	 16	98.3	14.1	 16
155	 16	81.0	10.4	 16
156	 16	80.5	11.1	 16
157	 16	161.5	15.2	 16
158	 16	204.0	24.5	 16
159	 16	232.0	35.9	 16
160	 16	453.0	59.6	 16
161	 16	262.8	40.0	 16
162	 16	106.5	13.6	 16
163	 16	117.0	18.7	 16
164	 16	79.3	15.6	 16
165	 16	82.3	60.1	 16
166	 16	90.3	17.8	 16
167	 16	87.5	14.5	 16
168	 16	96.0	11.5	 16
169	 16	106.0	11.7	 16
170	 16	72.5	12.5	 16
171	 16	77.3	12.7	 16
172	 16	94.0	11.9	 16
173	 16	92.3	11.8	 16
174	 16	76.8	11.7	 16
175	 16	79.5	15.3	 16
176	 16	104.8	15.8	 16
177	 16	234.3	30.8	 16
178	 16	1181.8	68.8	 16
179	 16	123.5	17.8	 16
180	 16	96.0	15.1	 16
181	 16	195.5	29.8	 16
182	 16	234.3	27.6	 16
183	 16	178.8	22.0	 16
184	 16	169.0	19.8	 16
185	 16	87.0	12.1	 16
186	 16	89.3	18.9	 16
187	 16	86.8	22.4	 16
188	 16	130.8	25.7	 16
189	 16	191.3	26.3	 16
190	 16	212.5	31.6	 16
191	 16	91.3	10.7	 16
192	 16	124.0	21.8	 16
193	 16	111.5	22.0	 16
194	 16	226.3	26.6	 16
195	 16	112.8	20.3	 16
196	 16	99.3	17.6	 16
197	 16	96.5	16.9	 16
198	 16	74.8	11.0	 16
199	 16	74.0	15.4	 16
200	 16	75.0	11.4	 16
201	 16	100.3	17.3	 16
202	 16	235.5	36.8	 16
203	 16	95.3	11.8	 16
204	 16	96.5	16.8	 16
205	 16	175.0	27.2	 16
206	 16	110.5	19.0	 16
207	 16	113.0	15.8	 16
208	 16	113.5	17.4	 16
209	 16	130.0	15.7	 16
210	 16	75.5	9.6	 16
211	 16	78.8	15.9	 16
212	 16	71.3	12.9	 16
213	 16	75.0	12.6	 16
214	 16	88.8	16.1	 16
215	 16	69.5	11.7	 16
216	 16	494.3	57.6	 16
217	 16	144.8	13.8	 16
218	 16	306.5	39.7	 16
219	 16	124.3	14.4	 16
220	 16	88.3	15.8	 16
221	 16	93.3	14.4	 16
222	 16	154.3	22.8	 20
223	 16	89.3	15.4	 16
224	 16	75.8	10.2	 16
225	 16	93.5	18.1	 16
226	 16	101.3	20.5	 16
227	 16	82.5	14.8	 16
228	 16	96.5	17.4	 16
229	 16	568.8	82.8	 16
230	 16	89.8	15.1	 16
231	 16	87.0	11.0	 16
232	 16	70.8	12.2	 16
233	 16	70.5	10.5	 16
234	 16	189.3	28.8	 16
235	 16	404.0	53.0	 12
236	 16	423.3	39.9	 16
237	 16	194.3	27.6	 16
238	 16	94.3	24.6	 16
239	 16	139.3	17.0	 16
240	 16	95.3	10.3	 16
241	 16	82.8	16.4	 16
242	 16	116.8	14.8	 16
243	 16	108.8	21.9	 16
244	 16	90.3	13.6	 16
245	 16	100.0	19.2	 16
246	 16	92.3	14.9	 16
247	 16	84.5	11.8	 16
248	 16	83.8	9.8	 16
249	 16	276.8	54.7	 16
250	 16	79.3	16.0	 16
251	 16	103.3	15.0	 16
252	 16	83.3	10.3	 16
253	 16	143.0	31.0	 16
254	 16	1301.5	113.9	 16
255	 16	245.5	28.0	 16
256	 16	118.5	11.4	 16
257	 16	168.8	22.9	 16
258	 16	68.8	10.5	 16
259	 16	66.3	13.1	 16
260	 16	75.0	7.4	 16
261	 16	122.8	27.2	 16
262	 16	105.5	13.9	 16
263	 16	98.0	14.3	 16
264	 16	148.8	22.0	 16
265	 16	94.5	13.5	 16
266	 16	81.5	27.4	 16
267	 16	129.0	24.3	 16
268	 16	198.8	37.1	 16
269	 16	92.3	15.8	 16
270	 16	80.3	13.8	 16
271	 16	78.3	12.0	 16
272	 16	94.5	15.7	 16
273	 16	94.5	16.5	 16
274	 16	178.8	19.0	 16
275	 16	188.5	18.6	 16
276	 16	127.5	12.9	 16
277	 16	87.3	13.9	 16
278	 16	79.5	11.0	 16
279	 16	109.5	17.0	 16
280	 16	260.3	28.5	 16
281	 16	111.8	15.4	 16
282	 16	108.8	14.8	 16
283	 16	88.3	17.5	 16
284	 16	79.5	12.6	 16
285	 16	116.0	10.1	 16
286	 16	122.5	22.7	 16
287	 16	185.8	23.1	 16
288	 16	443.0	61.9	 16
289	 16	104.0	14.4	 16
290	 16	114.3	17.2	 16
291	 16	93.3	15.5	 16
292	 16	326.5	31.5	 16
293	 16	152.8	22.9	 16
294	 16	115.0	18.4	 16
295	 16	80.3	13.7	 16
296	 16	109.0	19.3	 16
297	 16	309.5	39.0	 16
298	 16	110.3	15.2	 16
299	 16	106.3	17.2	 16
300	 16	74.3	10.7	 16
301	 16	83.3	16.3	 16
302	 16	76.3	10.6	 16
303	 16	76.0	14.4	 16
304	 16	97.0	14.3	 16
305	 16	81.3	9.8	 16
306	 16	101.8	16.6	 16
307	 16	109.8	21.2	 16
308	 16	122.8	14.1	 16
309	 16	124.3	13.1	 16
310	 16	740.5	54.0	 16
311	 16	215.8	24.6	 16
312	 16	152.5	24.7	 16
313	 16	87.5	14.0	 16
314	 16	83.0	13.0	 16
315	 16	131.3	16.9	 16
316	 16	663.5	65.6	 16
317	 16	236.0	34.1	 16
318	 16	117.0	14.8	 16
319	 16	217.0	27.7	 16
320	 16	156.0	20.5	 16
321	 16	199.5	18.4	 16
322	 16	194.3	19.6	 16
323	 16	87.5	12.2	 16
324	 16	121.5	8.4	 12
325	 16	196.5	24.4	 16
326	 16	133.5	21.4	 16
327	 16	116.5	17.8	 16
328	 16	84.3	14.9	 16
329	 16	73.3	11.4	 16
330	 16	180.5	30.1	 16
331	 16	76.3	12.6	 16
332	 16	136.5	18.0	 16
333	 16	273.0	29.1	 16
334	 16	91.3	13.0	 16
335	 16	87.8	12.2	 16
336	 16	71.5	12.6	 16
337	 16	392.0	60.8	 16
338	 16	118.3	27.1	 16
339	 16	109.0	19.1	 16
340	 16	78.0	10.7	 16
341	 16	83.0	16.4	 16
342	 16	87.8	16.9	 16
343	 16	65.5	15.6	 16
344	 16	73.8	10.5	 16
345	 16	94.5	28.4	 16
346	 16	118.5	16.3	 16
347	 16	75.0	9.2	 16
348	 16	97.3	15.6	 16
349	 16	88.0	13.7	 16
350	 16	88.3	13.4	 16
351	 16	138.0	18.0	 16
352	 16	84.3	11.4	 16
353	 16	102.8	16.4	 16
354	 16	82.0	18.1	 16
355	 16	92.5	11.3	 16
356	 16	359.5	39.2	 16
357	 16	137.3	17.8	 16
358	 16	145.5	26.0	 16
359	 16	134.0	15.9	 16
360	 16	79.8	11.7	 16
361	 16	104.3	20.9	 16
362	 16	98.3	16.9	 16
363	 16	88.3	17.1	 16
364	 16	97.0	21.6	 16
365	 16	85.8	14.1	 20
366	 16	129.3	13.6	 16
367	 16	131.8	17.4	 16
368	 16	77.5	14.3	 16
369	 16	73.3	9.4	 16
370	 16	71.3	10.3	 16
371	 16	79.0	12.4	 16
372	 16	152.3	23.7	 16
373	 16	134.5	15.9	 16
374	 16	91.3	12.8	 16
375	 16	350.5	49.7	 16
376	 16	121.8	18.2	 16
377	 16	97.3	15.0	 16
378	 16	90.8	12.0	 16
379	 16	176.0	31.3	 16
380	 16	82.3	10.4	 16
381	 16	82.3	16.3	 16
382	 16	81.3	23.6	 16
383	 16	85.3	12.8	 16
384	 16	95.8	19.6	 16
385	 16	160.0	24.5	 16
386	 16	148.3	27.3	 16
387	 16	279.8	26.8	 16
388	 16	202.8	20.9	 16
389	 16	140.3	24.2	 16
390	 16	82.3	14.7	 16
391	 16	89.3	9.5	 16
392	 16	108.5	52.5	 16
393	 16	146.0	19.7	 16
394	 16	167.5	21.6	 16
395	 16	121.3	17.2	 16
396	 16	75.3	11.0	 16
397	 16	85.5	10.1	 16
398	 16	84.5	14.9	 16
399	 16	94.0	22.2	 16
400	 16	148.0	31.6	 16
401	 16	77.8	14.0	 16
402	 16	131.8	22.1	 16
403	 16	111.8	19.5	 16
404	 16	329.8	29.7	 16
405	 16	371.3	28.2	 16
406	 16	114.8	15.6	 16
407	 16	112.8	15.6	 16
408	 16	133.3	18.1	 16
409	 16	95.3	31.0	 16
410	 16	95.0	13.8	 16
411	 16	71.3	11.9	 16
412	 16	74.3	11.4	 16
413	 16	84.3	14.3	 12
414	 16	86.0	12.2	 16
415	 16	98.3	11.8	 16
416	 16	163.3	20.9	 16
417	 16	155.8	20.6	 16
418	 16	139.0	20.7	 16
419	 16	129.3	14.4	 16
420	 16	81.8	16.9	 16
421	 16	89.0	11.4	 16
422	 16	74.0	11.8	 16
423	 16	135.5	23.1	 16
424	 16	82.3	9.5	 16
425	 16	82.3	15.9	 16
426	 16	95.0	14.1	 16
427	 16	165.5	33.3	 16
428	 16	84.0	13.3	 16
429	 16	84.8	15.3	 16
430	 16	75.0	11.7	 16
431	 16	2424.8	229.6	 16
432	 16	87.5	11.3	 16
433	 16	85.5	12.5	 16
434	 16	268.5	35.3	 16
435	 16	187.5	20.6	 16
436	 16	111.3	15.1	 16
437	 16	244.8	25.0	 16
438	 16	288.5	33.1	 16
439	 16	143.5	25.8	 16
440	 16	1899.5	310.1	 16
441	 16	393.0	32.6	 16
442	 16	84.8	14.1	 16
443	 16	80.5	15.3	 16
444	 16	154.5	20.1	 16
445	 16	332.0	30.6	 16
446	 16	230.3	28.6	 16
447	 16	208.5	23.4	 16
448	 16	205.8	34.9	 16
449	 16	160.5	34.0	 16
450	 16	138.8	18.1	 16
451	 16	346.5	39.1	 16
452	 16	138.8	23.5	 16
453	 16	193.3	22.6	 16
454	 16	152.3	11.8	 16
455	 16	79.3	13.1	 16
456	 16	66.3	8.6	 16
457	 16	85.0	11.0	 16
458	 16	156.8	18.5	 16
459	 16	105.3	13.3	 16
460	 16	124.5	24.8	 16
461	 16	124.3	18.3	 16
462	 16	94.5	12.1	 16
463	 16	69.3	12.3	 16
464	 16	83.5	12.2	 16
465	 16	82.5	12.3	 16
466	 16	68.3	10.5	 16
467	 16	92.3	13.8	 16
468	 16	110.8	16.0	 16
469	 16	158.0	22.1	 16
470	 16	207.3	25.3	 16
471	 16	126.3	22.1	 16
472	 16	111.0	19.0	 16
473	 16	84.8	14.3	 16
474	 16	102.0	17.0	 16
475	 16	149.0	27.7	 16
476	 16	71.3	14.1	 16
477	 16	134.0	16.9	 16
478	 16	240.0	16.1	 16
479	 16	130.8	28.5	 16
480	 16	74.0	13.1	 16
481	 16	95.3	12.7	 16
482	 16	79.3	11.5	 16
483	 16	69.0	12.4	 16
484	 16	97.8	13.7	 16
485	 16	77.5	12.2	 16
486	 16	100.3	21.7	 16
487	 16	98.3	19.9	 16
488	 16	88.8	15.8	 16
489	 16	79.8	9.9	 16
490	 16	108.3	16.6	 16
491	 16	75.0	10.2	 16
492	 16	122.3	13.4	 16
493	 16	229.5	32.2	 16
494	 16	76.3	10.8	 16
495	 16	77.8	11.0	 16
496	 16	75.5	16.2	 16
497	 16	70.0	10.5	 16
498	 16	75.5	14.9	 16
499	 16	68.5	12.7	 16
500	 16	80.3	14.3	 16
501	 16	249.5	34.4	 16
502	 16	79.3	10.3	 12
503	 16	105.5	21.2	 16
504	 16	71.3	11.4	 16
505	 16	117.3	16.1	 16
506	 16	95.3	20.8	 16
507	 16	129.0	19.5	 20
508	 16	134.3	17.5	 16
509	 16	174.0	61.4	 16
510	 16	123.8	22.1	 16
511	 16	80.8	11.6	 16
512	 16	73.3	8.2	 16
513	 16	89.3	14.2	 16
514	 16	113.3	19.8	 16
515	 16	80.0	16.6	 16
516	 16	107.0	16.3	 16
517	 16	86.3	16.0	 16
518	 16	78.0	15.2	 16
519	 16	80.0	14.0	 16
520	 16	90.8	16.2	 16
521	 16	76.3	11.3	 16
522	 16	77.0	9.9	 16
523	 16	96.3	15.0	 16
524	 16	71.5	15.5	 16
525	 16	129.5	16.2	 16
526	 16	104.0	18.3	 16
527	 16	185.3	22.2	 16
528	 16	92.0	15.3	 16
529	 16	84.3	11.0	 16
530	 16	214.5	25.8	 16
531	 16	369.0	48.4	 16
532	 16	78.3	9.6	 16
533	 16	79.0	15.0	 16
534	 16	90.3	13.7	 16
535	 16	193.5	31.6	 16
536	 16	94.5	21.7	 16
537	 16	187.5	29.6	 16
538	 16	288.8	27.9	 16
539	 16	136.3	19.5	 16
540	 16	254.0	54.2	 16
541	 16	75.3	15.1	 16
542	 16	77.5	11.7	 16
543	 16	78.5	11.7	 16
544	 16	174.0	29.1	 16
545	 16	135.8	15.8	 16
546	 16	78.0	12.8	 16
547	 16	139.3	19.9	 16
548	 16	117.3	16.6	 16
549	 16	80.3	14.7	 16
550	 16	84.5	14.4	 16
551	 16	73.0	13.1	 16
552	 16	77.0	12.2	 16
553	 16	102.8	10.8	 16
554	 16	648.8	96.6	 16
555	 16	141.0	14.2	 16
556	 16	549.5	66.9	 16
557	 16	174.5	24.5	 16
558	 16	75.8	10.8	 16
559	 16	95.5	15.3	 16
560	 16	66.0	10.8	 16
561	 16	76.0	8.2	 16
562	 16	128.8	19.8	 16
563	 16	88.0	9.5	 16
564	 16	78.0	5.7	 16
565	 16	101.3	12.1	 16
566	 16	88.3	17.0	 16
567	 16	244.8	27.8	 16
568	 16	197.3	19.9	 16
569	 16	206.3	27.9	 16
570	 16	180.3	26.6	 16
571	 16	98.0	23.0	 16
572	 16	107.0	13.4	 16
573	 16	97.0	17.9	 16
574	 16	70.0	11.6	 16
575	 16	76.3	12.5	 16
576	 16	112.3	18.4	 16
577	 16	248.0	25.7	 16
578	 16	84.0	10.6	 16
579	 16	95.3	13.8	 16
580	 16	183.5	24.0	 16
581	 16	102.0	14.4	 16
582	 16	94.8	16.0	 16
583	 16	109.0	12.6	 16
584	 16	123.5	23.3	 16
585	 16	119.5	14.3	 16
586	 16	161.3	21.0	 16
587	 16	112.0	17.4	 16
588	 16	114.3	14.6	 16
589	 16	84.3	16.4	 16
590	 16	88.3	10.9	 16
591	 16	94.0	10.4	 12
592	 16	94.3	12.1	 16
593	 16	180.3	32.9	 16
594	 16	130.0	20.9	 16
595	 16	235.3	17.5	 16
596	 16	131.3	21.3	 16
597	 16	105.3	18.9	 16
598	 16	84.0	11.5	 16
599	 16	118.0	22.5	 16
600	 16	155.0	21.4	 16
601	 16	221.0	32.3	 16
602	 16	141.0	23.6	 16
603	 16	64.3	10.3	 16
604	 16	83.8	14.3	 16
605	 16	125.0	12.8	 16
606	 16	74.5	11.0	 16
607	 16	109.0	12.6	 16
608	 16	120.3	24.0	 16
609	 16	114.0	13.9	 16
610	 16	79.0	12.6	 16
611	 16	83.3	12.4	 16
612	 16	73.5	13.3	 16
613	 16	121.3	26.1	 16
614	 16	89.0	12.1	 16
615	 16	79.5	16.6	 16
616	 16	93.3	17.0	 16
617	 16	204.8	26.0	 16
618	 16	107.3	19.6	 16
619	 16	176.3	32.1	 16
620	 16	148.3	25.6	 16
621	 16	81.3	13.8	 16
622	 16	561.8	83.5	 16
623	 16	389.5	34.9	 16
624	 16	89.8	14.0	 16
625	 16	279.0	34.3	 16
626	 16	109.5	16.5	 16
627	 16	105.3	17.6	 16
628	 16	152.0	20.4	 16
629	 16	132.0	18.0	 16
630	 16	245.8	29.9	 16
631	 16	175.0	29.5	 16
632	 16	109.3	15.9	 16
633	 16	211.5	27.4	 16
634	 16	222.3	26.0	 16
635	 16	214.3	23.8	 16
636	 16	112.5	9.0	 16
637	 16	93.3	13.9	 16
638	 16	213.3	24.9	 16
639	 16	118.5	21.0	 16
640	 16	122.0	21.8	 16
641	 16	278.3	26.8	 16
642	 16	152.0	41.1	 16
643	 16	81.0	12.0	 16
644	 16	127.3	11.7	 16
645	 16	92.0	20.4	 16
646	 16	96.3	15.7	 16
647	 16	97.8	15.4	 16
648	 16	92.8	16.2	 16
649	 16	68.8	11.6	 16
650	 16	63.3	10.3	 20
651	 16	77.0	18.5	 16
652	 16	87.5	13.0	 16
653	 16	131.8	18.8	 16
654	 16	80.5	13.2	 16
655	 16	74.5	13.8	 16
656	 16	435.5	86.0	 16
657	 16	101.3	27.7	 16
658	 16	88.8	15.3	 16
659	 16	80.8	12.1	 16
660	 16	194.8	26.1	 16
661	 16	105.5	14.8	 16
662	 16	557.8	76.1	 16
663	 16	109.8	20.2	 16
664	 16	118.3	16.1	 16
665	 16	205.5	32.1	 16
666	 16	88.3	16.1	 16
667	 16	66.3	8.2	 16
668	 16	73.3	12.9	 16
669	 16	73.3	15.0	 16
670	 16	67.8	12.1	 16
671	 16	105.0	14.9	 16
672	 16	81.0	13.1	 16
673	 16	88.0	16.0	 16
674	 16	154.8	19.1	 16
675	 16	636.5	95.4	 16
676	 16	93.0	13.3	 16
677	 16	85.5	10.0	 16
678	 16	116.8	17.2	 16
679	 16	86.5	16.4	 16
680	 16	77.0	9.2	 12
681	 16	79.3	17.4	 16
682	 16	69.0	11.8	 16
683	 16	134.0	17.3	 16
684	 16	89.3	12.2	 16
685	 16	103.3	13.3	 16
686	 16	153.8	19.8	 16
687	 16	137.0	23.5	 16
688	 16	81.3	12.0	 16
689	 16	80.8	16.1	 16
690	 16	106.8	17.0	 16
691	 16	92.5	11.4	 16
692	 16	763.8	121.5	 16
693	 16	71.8	13.3	 16
694	 16	134.5	23.5	 16
695	 16	85.3	13.8	 16
696	 16	99.3	13.3	 16
697	 16	88.0	13.9	 16
698	 16	97.5	12.2	 16
699	 16	75.0	12.3	 16
700	 16	100.3	9.8	 16
701	 16	121.3	13.8	 16
702	 16	466.5	40.7	 16
703	 16	95.3	17.1	 16
704	 16	385.3	18.0	 16
705	 16	350.8	39.3	 16
706	 16	176.3	32.8	 16
707	 16	111.3	23.3	 16
708	 16	219.3	42.6	 16
709	 16	78.5	13.1	 16
710	 16	367.8	58.1	 16
711	 16	6462.8	600.2	 16
  0	 17	109.5	21.6	 16
  1	 17	117.5	23.2	 16
  2	 17	75.3	10.1	 16
  3	 17	790.0	65.2	 16
  4	 17	133.3	31.4	 16
  5	 17	182.3	23.8	 16
  6	 17	102.3	19.1	 16
  7	 17	108.3	17.5	 16
  8	 17	203.3	32.3	 16
  9	 17	183.5	26.4	 16
 10	 17	77.3	9.4	 16
 11	 17	71.0	11.8	 16
 12	 17	108.5	24.2	 16
 13	 17	91.3	12.4	 16
 14	 17	100.3	14.5	 16
 15	 17	144.5	478.9	 16
 16	 17	6306.5	5528.8	 16
 17	 17	129.3	19.7	 16
 18	 17	1223.0	145.7	 16
 19	 17	118.8	25.3	 16
 20	 17	183.3	25.0	 16
 21	 17	99.8	14.3	 16
 22	 17	97.0	12.1	 16
 23	 17	82.0	14.2	 16
 24	 17	173.5	25.1	 16
 25	 17	79.5	9.9	 16
 26	 17	89.3	15.0	 16
 27	 17	74.3	10.5	 16
 28	 17	329.0	48.1	 16
 29	 17	72.5	11.5	 16
 30	 17	68.3	21.1	 16
 31	 17	83.0	20.2	 16
 32	 17	92.3	19.8	 16
 33	 17	72.0	10.7	 16
 34	 17	178.0	23.9	 16
 35	 17	206.0	28.4	 16
 36	 17	90.0	13.1	 16
 37	 17	135.0	19.8	 16
 38	 17	88.3	17.9	 16
 39	 17	258.3	42.1	 16
 40	 17	92.8	19.6	 16
 41	 17	83.5	9.2	 16
 42	 17	78.5	13.4	 16
 43	 17	85.0	14.1	 16
 44	 17	397.8	42.1	 16
 45	 17	358.3	48.6	 16
 46	 17	218.8	27.3	 16
 47	 17	190.5	26.9	 16
 48	 17	104.0	15.2	 16
 49	 17	104.3	15.0	 16
 50	 17	147.0	18.0	 16
 51	 17	121.3	16.9	 16
 52	 17	144.3	22.1	 16
 53	 17	77.3	11.5	 16
 54	 17	85.8	15.3	 16
 55	 17	84.5	13.6	 16
 56	 17	1541.3	231.1	 16
 57	 17	149.0	17.3	 16
 58	 17	88.8	12.3	 16
 59	 17	95.5	20.0	 16
 60	 17	162.5	98.5	 16
 61	 17	263.8	23.1	 16
 62	 17	99.3	15.6	 16
 63	 17	1402.8	140.9	 16
 64	 17	131.8	15.1	 16
 65	 17	157.3	20.3	 16
 66	 17	93.5	28.6	 16
 67	 17	264.0	29.6	 16
 68	 17	291.8	33.6	 16
 69	 17	618.5	40.5	 16
 70	 17	623.3	42.5	 16
 71	 17	315.3	33.7	 16
 72	 17	231.5	32.6	 16
 73	 17	97.3	14.2	 16
 74	 17	211.8	26.1	 16
 75	 17	146.3	25.0	 16
 76	 17	1224.0	74.2	 16
 77	 17	125.8	17.4	 16
 78	 17	490.5	62.4	 16
 79	 17	99.8	12.6	 16
 80	 17	140.5	23.8	 16
 81	 17	73.3	12.7	 16
 82	 17	87.0	14.8	 16
 83	 17	313.3	53.5	 16
 84	 17	74.3	44.9	 16
 85	 17	67.5	10.9	 16
 86	 17	69.0	10.4	 16
 87	 17	113.8	19.0	 16
 88	 17	387.0	39.3	 16
 89	 17	893.3	136.6	 20
 90	 17	133.0	18.4	 16
 91	 17	334.3	39.2	 16
 92	 17	154.0	18.3	 16
 93	 17	162.8	23.9	 16
 94	 17	84.0	13.9	 16
 95	 17	148.5	17.9	 16
 96	 17	380.3	39.4	 16
 97	 17	1929.3	337.8	 16
 98	 17	142.3	17.3	 16
 99	 17	396.8	51.1	 16
100	 17	1360.5	184.4	 16
101	 17	195.3	21.7	 16
102	 17	106.5	31.5	 16
103	 17	91.8	14.7	 16
104	 17	89.3	17.1	 16
105	 17	290.8	38.9	 16
106	 17	86.5	13.5	 16
107	 17	71.8	13.7	 16
108	 17	115.3	27.0	 16
109	 17	155.0	25.0	 16
110	 17	424.3	77.1	 16
111	 17	194.3	30.2	 16
112	 17	147.0	20.1	 16
113	 17	368.8	87.6	 16
114	 17	113.8	15.1	 16
115	 17	366.0	60.7	 16
116	 17	124.8	19.7	 16
117	 17	161.3	16.7	 16
118	 17	200.0	25.1	 16
119	 17	221.3	39.6	 16
120	 17	102.0	21.0	 16
121	 17	79.5	13.6	 16
122	 17	164.0	39.0	 16
123	 17	85.5	15.5	 16
124	 17	237.3	33.5	 16
125	 17	126.3	14.0	 16
126	 17	177.0	34.4	 16
127	 17	111.8	17.5	 16
128	 17	90.0	13.6	 16
129	 17	175.5	32.2	 16
130	 17	86.5	12.1	 16
131	 17	191.5	21.6	 16
132	 17	111.0	16.0	 16
133	 17	117.3	13.4	 16
134	 17	119.0	18.9	 16
135	 17	117.0	15.8	 16
136	 17	123.5	19.9	 16
137	 17	158.3	22.7	 16
138	 17	89.0	13.2	 16
139	 17	90.3	17.0	 16
140	 17	114.8	11.4	 16
141	 17	75.5	11.3	 16
142	 17	459.0	68.3	 16
143	 17	166.0	28.5	 16
144	 17	96.5	13.8	 16
145	 17	73.8	10.8	 16
146	 17	124.5	19.2	 16
147	 17	87.8	14.4	 16
148	 17	172.0	27.7	 16
149	 17	92.3	16.7	 16
150	 17	77.3	10.1	 16
151	 17	81.3	13.1	 16
152	 17	122.5	20.3	 16
153	 17	98.3	13.8	 16
154	 17	151.8	21.8	 16
155	 17	70.5	11.6	 16
156	 17	82.0	15.8	 16
157	 17	1059.3	88.7	 16
158	 17	174.3	34.7	 16
159	 17	213.8	27.0	 16
160	 17	151.3	21.1	 16
161	 17	201.3	31.5	 16
162	 17	161.8	19.3	 16
163	 17	119.5	20.6	 16
164	 17	132.5	18.3	 16
165	 17	89.8	12.4	 16
166	 17	80.0	14.6	 16
167	 17	103.0	21.5	 16
168	 17	237.5	28.4	 16
169	 17	238.3	33.7	 16
170	 17	629.5	62.4	 16
171	 17	146.5	27.3	 16
172	 17	396.8	52.1	 16
173	 17	216.0	32.4	 16
174	 17	193.8	22.4	 16
175	 17	226.8	33.3	 16
176	 17	507.0	50.2	 16
177	 17	354.5	25.2	 16
178	 17	719.5	39.4	 16
179	 17	335.0	33.9	 16
180	 17	178.8	24.1	 16
181	 17	139.8	20.2	 16
182	 17	109.5	14.9	 16
183	 17	120.3	15.9	 16
184	 17	85.3	17.3	 16
185	 17	85.8	13.9	 16
186	 17	205.8	38.8	 16
187	 17	1906.8	189.1	 16
188	 17	82.0	16.8	 16
189	 17	183.3	37.2	 16
190	 17	91.3	11.3	 16
191	 17	147.0	14.2	 16
192	 17	107.5	15.9	 16
193	 17	263.8	36.3	 16
194	 17	2552.0	160.5	 16
195	 17	191.0	31.6	 16
196	 17	113.5	18.6	 16
197	 17	74.8	13.3	 16
198	 17	345.5	49.0	 16
199	 17	327.3	44.1	 16
200	 17	451.3	71.9	 16
201	 17	103.0	21.0	 16
202	 17	101.3	16.2	 16
203	 17	200.0	16.7	 16
204	 17	101.0	18.6	 16
205	 17	79.5	10.0	 16
206	 17	103.3	19.0	 16
207	 17	128.3	16.9	 16
208	 17	133.8	18.8	 16
209	 17	92.3	13.2	 16
210	 17	268.8	28.2	 16
211	 17	74.5	14.0	 16
212	 17	358.0	40.2	 16
213	 17	144.0	15.6	 16
214	 17	177.3	25.8	 16
215	 17	85.3	15.3	 16
216	 17	103.3	14.5	 16
217	 17	227.0	30.2	 16
218	 17	73.0	11.5	 16
219	 17	81.8	15.9	 16
220	 17	122.0	19.4	 16
221	 17	70.8	10.1	 16
222	 17	91.5	15.9	 16
223	 17	71.3	13.7	 16
224	 17	147.5	19.3	 16
225	 17	75.5	11.5	 16
226	 17	84.8	17.4	 16
227	 17	76.8	14.5	 16
228	 17	265.3	37.0	 16
229	 17	260.0	30.4	 16
230	 17	85.5	11.0	 16
231	 17	416.3	40.4	 16
232	 17	171.0	25.3	 20
233	 17	1282.3	279.7	 16
234	 17	470.8	57.5	 16
235	 17	159.0	33.2	 16
236	 17	82.5	12.3	 16
237	 17	172.3	22.0	 16
238	 17	69.8	13.7	 16
239	 17	176.5	18.6	 16
240	 17	95.3	23.8	 16
241	 17	319.5	53.2	 16
242	 17	228.3	29.3	 16
243	 17	417.5	73.1	 16
244	 17	87.8	14.9	 16
245	 17	515.0	99.4	 16
246	 17	137.8	27.2	 16
247	 17	111.3	17.1	 16
248	 17	98.5	14.8	 16
249	 17	152.3	33.0	 16
250	 17	390.5	35.3	 16
251	 17	337.3	61.4	 16
252	 17	118.0	17.1	 16
253	 17	457.5	73.3	 16
254	 17	135.0	22.2	 16
255	 17	85.3	13.5	 16
256	 17	126.5	19.8	 16
257	 17	122.5	27.3	 16
258	 17	248.0	29.2	 16
259	 17	140.5	25.1	 16
260	 17	186.5	27.1	 16
261	 17	428.3	42.6	 16
262	 17	130.8	23.7	 16
263	 17	91.3	16.0	 16
264	 17	95.3	13.6	 16
265	 17	116.3	21.6	 16
266	 17	103.0	16.7	 16
267	 17	97.3	18.2	 16
268	 17	156.0	14.7	 16
269	 17	351.8	42.6	 16
270	 17	224.8	18.6	 16
271	 17	226.0	32.7	 16
272	 17	199.8	39.4	 16
273	 17	157.5	38.1	 16
274	 17	87.8	15.6	 16
275	 17	702.5	104.4	 16
276	 17	151.3	31.9	 16
277	 17	254.8	38.1	 16
278	 17	166.8	17.7	 16
279	 17	161.5	20.6	 16
280	 17	77.0	12.9	 16
281	 17	104.0	14.1	 16
282	 17	131.0	16.2	 16
283	 17	94.0	22.0	 16
284	 17	104.5	20.3	 16
285	 17	71.8	11.6	 16
286	 17	75.0	9.8	 16
287	 17	131.3	22.8	 16
288	 17	102.0	15.1	 16
289	 17	99.5	17.1	 16
290	 17	181.5	24.2	 16
291	 17	90.8	13.6	 16
292	 17	126.3	15.2	 16
293	 17	94.5	12.0	 16
294	 17	74.5	11.0	 16
295	 17	126.8	18.2	 16
296	 17	79.3	8.9	 16
297	 17	74.0	13.3	 16
298	 17	106.5	18.6	 16
299	 17	99.8	17.6	 16
300	 17	263.3	33.1	 16
301	 17	153.0	27.6	 16
302	 17	322.5	35.9	 16
303	 17	249.8	59.8	 16
304	 17	117.5	19.4	 16
305	 17	250.8	28.6	 16
306	 17	210.5	23.9	 16
307	 17	7974.5	721.7	 16
308	 17	7577.3	696.1	 16
309	 17	6363.0	1025.0	 16
310	 17	158.3	24.0	 16
311	 17	101.0	18.6	 16
312	 17	126.5	17.9	 16
313	 17	182.8	29.1	 16
314	 17	137.8	19.2	 16
315	 17	141.5	18.2	 16
316	 17	829.3	77.7	 16
317	 17	111.0	14.2	 16
318	 17	119.8	15.9	 16
319	 17	79.0	14.3	 16
320	 17	129.0	23.7	 16
321	 17	88.3	12.4	 16
322	 17	124.5	18.4	 16
323	 17	98.3	17.9	 16
324	 17	78.0	11.5	 16
325	 17	84.3	17.3	 16
326	 17	74.8	11.7	 16
327	 17	114.5	17.5	 16
328	 17	76.0	16.3	 16
329	 17	95.3	24.5	 16
330	 17	267.0	45.2	 16
331	 17	176.0	27.7	 16
332	 17	265.8	38.3	 16
333	 17	206.5	30.3	 16
334	 17	100.8	19.3	 16
335	 17	498.3	72.0	 16
336	 17	214.5	34.7	 16
337	 17	170.5	30.6	 16
338	 17	242.0	34.3	 16
339	 17	1607.0	138.2	 16
340	 17	87.5	13.2	 16
341	 17	77.3	11.0	 16
342	 17	293.3	35.3	 16
343	 17	115.0	14.2	 16
344	 17	188.3	14.5	 16
345	 17	190.0	29.1	 16
346	 17	146.3	13.8	 16
347	 17	116.0	22.2	 16
348	 17	192.0	16.9	 16
349	 17	117.0	15.3	 16
350	 17	85.0	14.7	 16
351	 17	130.5	19.3	 16
352	 17	1639.3	117.8	 16
353	 17	92.8	53.6	 16
354	 17	173.5	19.1	 16
355	 17	119.5	14.0	 16
356	 17	221.0	34.8	 16
357	 17	160.3	24.6	 16
358	 17	126.3	14.5	 16
359	 17	92.8	13.2	 16
360	 17	89.3	14.0	 16
361	 17	177.0	23.3	 16
362	 17	156.3	22.8	 16
363	 17	119.3	16.4	 16
364	 17	112.5	15.6	 16
365	 17	443.3	70.8	 16
366	 17	161.0	23.0	 16
367	 17	88.3	16.6	 16
368	 17	84.3	15.0	 16
369	 17	591.5	73.2	 16
370	 17	97.0	16.4	 16
371	 17	85.5	12.0	 16
372	 17	95.0	11.5	 16
373	 17	110.3	18.3	 16
374	 17	82.5	16.1	 20
375	 17	118.0	16.2	 16
376	 17	260.3	44.0	 16
377	 17	139.5	21.5	 16
378	 17	102.0	19.7	 16
379	 17	79.8	10.6	 16
380	 17	87.3	15.7	 16
381	 17	115.0	13.3	 16
382	 17	75.3	17.3	 16
383	 17	180.8	20.3	 16
384	 17	137.3	26.7	 16
385	 17	417.8	37.7	 16
386	 17	166.8	27.0	 16
387	 17	270.3	33.2	 16
388	 17	71.0	9.1	 16
389	 17	133.8	16.5	 16
390	 17	82.5	8.1	 16
391	 17	101.3	14.3	 16
392	 17	98.5	13.5	 16
393	 17	102.3	16.1	 16
394	 17	148.8	16.8	 16
395	 17	261.3	27.1	 16
396	 17	94.0	13.2	 16
397	 17	77.0	10.6	 16
398	 17	89.5	20.6	 16
399	 17	165.3	29.1	 16
400	 17	114.5	16.9	 16
401	 17	96.3	15.4	 16
402	 17	170.3	25.2	 16
403	 17	144.0	15.1	 16
404	 17	136.3	20.1	 16
405	 17	90.0	13.8	 16
406	 17	102.0	12.6	 16
407	 17	433.3	63.2	 16
408	 17	80.0	14.1	 16
409	 17	76.3	9.8	 16
410	 17	73.8	21.0	 16
411	 17	106.3	11.0	 16
412	 17	131.5	18.4	 16
413	 17	111.3	23.9	 16
414	 17	163.0	19.4	 16
415	 17	96.8	18.1	 16
416	 17	79.0	12.3	 16
417	 17	95.0	15.6	 16
418	 17	478.8	66.1	 16
419	 17	95.8	14.6	 16
420	 17	429.8	56.9	 16
421	 17	102.5	14.9	 16
422	 17	115.3	43.2	 16
423	 17	124.3	15.7	 16
424	 17	151.5	21.7	 16
425	 17	164.8	23.1	 16
426	 17	361.3	40.7	 16
427	 17	162.8	24.9	 16
428	 17	79.0	11.8	 16
429	 17	77.5	14.3	 16
430	 17	308.8	35.4	 16
431	 17	208.0	25.8	 16
432	 17	215.0	27.4	 16
433	 17	75.0	13.7	 16
434	 17	156.8	25.6	 16
435	 17	89.3	15.7	 16
436	 17	127.8	18.6	 16
437	 17	112.3	8.9	 16
438	 17	196.3	20.9	 16
439	 17	74.3	12.9	 16
440	 17	274.5	23.0	 16
441	 17	320.8	35.9	 16
442	 17	219.3	31.2	 16
443	 17	271.5	31.5	 16
444	 17	204.0	29.7	 16
445	 17	112.8	18.9	 16
446	 17	113.0	15.4	 16
447	 17	129.8	23.2	 16
448	 17	86.3	12.0	 16
449	 17	81.0	12.8	 16
450	 17	95.5	14.4	 16
451	 17	81.3	13.7	 16
452	 17	322.5	29.4	 16
453	 17	128.8	17.7	 16
454	 17	91.8	14.5	 16
455	 17	131.0	26.4	 16
456	 17	137.5	22.5	 16
457	 17	73.3	8.8	 16
458	 17	68.3	12.0	 16
459	 17	134.5	20.4	 16
460	 17	225.8	38.6	 16
461	 17	88.5	17.0	 16
462	 17	118.3	16.4	 16
463	 17	121.0	13.6	 16
464	 17	598.5	63.4	 16
465	 17	351.5	41.3	 16
466	 17	68.0	13.3	 16
467	 17	170.0	27.5	 16
468	 17	105.3	18.4	 16
469	 17	103.0	18.4	 16
470	 17	191.5	29.9	 16
471	 17	75.8	11.9	 16
472	 17	108.5	15.0	 16
473	 17	75.3	14.6	 16
474	 17	155.5	21.9	 16
475	 17	299.5	21.5	 16
476	 17	106.3	15.6	 16
477	 17	74.3	10.7	 16
478	 17	258.3	33.0	 16
479	 17	407.8	37.0	 16
480	 17	137.5	20.7	 16
481	 17	109.0	11.7	 16
482	 17	396.5	58.8	 16
483	 17	402.5	44.8	 16
484	 17	115.5	17.4	 16
485	 17	179.3	19.7	 16
486	 17	89.0	21.3	 16
487	 17	207.5	23.3	 16
488	 17	76.0	9.5	 16
489	 17	106.0	20.3	 16
490	 17	75.5	11.5	 16
491	 17	129.8	17.4	 16
492	 17	72.0	12.5	 16
493	 17	146.3	25.6	 16
494	 17	561.8	53.7	 16
495	 17	386.3	51.2	 16
496	 17	162.8	18.4	 16
497	 17	176.8	25.3	 16
498	 17	207.0	20.5	 16
499	 17	96.0	13.2	 16
500	 17	103.8	14.7	 16
501	 17	207.8	23.7	 16
502	 17	100.3	16.7	 16
503	 17	202.0	23.1	 16
504	 17	100.3	13.7	 16
505	 17	71.0	9.3	 16
506	 17	68.0	9.7	 16
507	 17	70.0	11.4	 16
508	 17	70.0	11.1	 16
509	 17	73.5	10.3	 16
510	 17	180.8	23.6	 16
511	 17	234.3	36.5	 16
512	 17	84.5	15.6	 16
513	 17	89.8	22.4	 16
514	 17	76.5	13.2	 16
515	 17	226.3	27.0	 16
516	 17	126.5	13.8	 20
517	 17	97.5	14.4	 16
518	 17	142.8	25.7	 16
519	 17	81.8	12.7	 16
520	 17	102.0	17.0	 16
521	 17	103.3	21.1	 16
522	 17	94.8	19.2	 16
523	 17	234.8	34.5	 16
524	 17	89.5	16.4	 16
525	 17	121.8	39.9	 16
526	 17	313.8	49.2	 16
527	 17	102.3	17.2	 16
528	 17	161.3	18.3	 16
529	 17	104.0	14.8	 16
530	 17	115.3	17.4	 16
531	 17	371.3	47.9	 16
532	 17	88.5	18.8	 16
533	 17	94.3	23.1	 16
534	 17	152.5	20.3	 16
535	 17	75.0	9.7	 16
536	 17	82.5	7.7	 16
537	 17	81.0	12.4	 16
538	 17	90.0	16.5	 16
539	 17	83.5	10.5	 16
540	 17	176.3	30.9	 16
541	 17	180.0	33.4	 16
542	 17	228.3	25.4	 16
543	 17	141.8	17.8	 16
544	 17	99.5	15.5	 16
545	 17	106.0	15.1	 16
546	 17	141.8	86.4	 16
547	 17	107.5	13.3	 16
548	 17	107.0	17.4	 16
549	 17	107.8	18.6	 16
550	 17	176.0	24.1	 16
551	 17	197.8	29.9	 16
552	 17	468.5	82.4	 16
553	 17	361.8	37.0	 16
554	 17	452.0	35.7	 16
555	 17	408.0	36.1	 16
556	 17	136.5	27.4	 16
557	 17	100.0	17.3	 16
558	 17	148.3	26.0	 16
559	 17	948.5	60.1	 16
560	 17	112.0	16.2	 16
561	 17	75.5	9.3	 16
562	 17	106.5	18.0	 16
563	 17	166.3	19.3	 16
564	 17	1375.3	193.0	 16
565	 17	102.0	11.0	 16
566	 17	86.3	13.6	 16
567	 17	111.8	18.6	 16
568	 17	84.0	12.8	 16
569	 17	504.3	53.2	 16
570	 17	82.3	10.3	 16
571	 17	86.5	18.5	 16
572	 17	80.5	15.1	 16
573	 17	178.0	20.3	 16
574	 17	133.5	21.8	 16
575	 17	481.0	53.1	 16
576	 17	350.0	38.9	 16
577	 17	96.0	16.0	 16
578	 17	88.3	11.3	 16
579	 17	207.5	23.7	 16
580	 17	906.0	78.6	 16
581	 17	203.8	35.7	 16
582	 17	251.3	24.3	 16
583	 17	117.5	18.3	 16
584	 17	1109.0	113.3	 16
585	 17	454.3	33.3	 16
586	 17	148.8	21.2	 16
587	 17	116.5	12.5	 16
588	 17	78.3	12.4	 16
589	 17	144.3	20.4	 16
590	 17	469.8	92.5	 16
591	 17	94.8	16.5	 16
592	 17	81.5	11.7	 16
593	 17	681.3	83.3	 16
594	 17	85.3	16.1	 16
595	 17	115.3	13.6	 16
596	 17	334.3	22.2	 16
597	 17	404.5	39.7	 16
598	 17	110.8	22.6	 16
599	 17	105.3	14.1	 16
600	 17	130.3	14.7	 16
601	 17	447.0	44.9	 16
602	 17	1024.8	90.6	 16
603	 17	135.0	20.6	 16
604	 17	237.8	24.8	 16
605	 17	155.0	20.9	 16
606	 17	126.3	19.3	 16
607	 17	106.0	16.4	 16
608	 17	193.3	22.0	 16
609	 17	92.3	13.6	 16
610	 17	121.0	16.3	 16
611	 17	191.8	26.7	 16
612	 17	74.8	10.4	 16
613	 17	62.8	8.4	 16
614	 17	90.3	16.4	 16
615	 17	515.0	90.0	 16
616	 17	118.0	15.5	 16
617	 17	185.3	86.9	 16
618	 17	350.0	33.2	 16
619	 17	354.3	53.9	 16
620	 17	144.5	26.1	 16
621	 17	257.3	28.8	 16
622	 17	447.8	94.2	 16
623	 17	374.5	25.1	 16
624	 17	210.0	22.2	 16
625	 17	210.0	28.5	 16
626	 17	95.8	13.7	 16
627	 17	124.8	20.1	 16
628	 17	130.8	15.9	 16
629	 17	189.3	30.4	 16
630	 17	150.0	22.3	 16
631	 17	94.5	16.4	 16
632	 17	85.3	12.5	 16
633	 17	151.0	13.8	 16
634	 17	179.0	25.4	 16
635	 17	242.8	36.4	 16
636	 17	79.3	6.3	 16
637	 17	81.0	11.6	 16
638	 17	112.0	16.3	 16
639	 17	550.0	72.7	 16
640	 17	197.0	27.3	 16
641	 17	241.3	36.1	 16
642	 17	272.5	29.2	 16
643	 17	217.0	26.2	 16
644	 17	83.0	12.8	 16
645	 17	284.3	33.4	 16
646	 17	208.8	37.2	 16
647	 17	191.5	21.4	 16
648	 17	230.3	25.3	 16
649	 17	169.0	22.1	 16
650	 17	113.8	18.7	 16
651	 17	81.0	10.8	 16
652	 17	105.3	18.2	 16
653	 17	149.8	23.5	 16
654	 17	149.0	20.9	 16
655	 17	92.8	11.4	 16
656	 17	73.8	21.0	 16
657	 17	117.0	18.3	 16
658	 17	91.8	20.5	 16
659	 17	195.8	35.2	 20
660	 17	91.0	21.7	 16
661	 17	157.0	26.3	 16
662	 17	179.0	22.0	 16
663	 17	102.3	16.2	 16
664	 17	62.5	8.7	 16
665	 17	67.0	12.0	 16
666	 17	338.5	58.3	 16
667	 17	152.5	25.2	 16
668	 17	66.3	11.2	 16
669	 17	65.0	9.3	 16
670	 17	79.0	9.6	 16
671	 17	1265.3	82.2	 16
672	 17	1145.8	183.6	 16
673	 17	75.3	12.5	 16
674	 17	226.3	30.4	 16
675	 17	304.5	29.8	 16
676	 17	183.8	20.9	 16
677	 17	291.3	25.4	 16
678	 17	114.3	15.9	 16
679	 17	124.3	16.4	 16
680	 17	134.5	18.4	 16
681	 17	121.3	16.9	 16
682	 17	103.3	13.3	 16
683	 17	118.8	17.1	 16
684	 17	171.5	29.9	 16
685	 17	165.0	20.7	 16
686	 17	115.5	44.2	 16
687	 17	213.5	20.0	 16
688	 17	399.8	50.1	 16
689	 17	85.5	12.3	 16
690	 17	113.0	22.5	 16
691	 17	175.3	21.3	 16
692	 17	172.8	29.9	 16
693	 17	200.5	24.4	 16
694	 17	310.8	42.8	 16
695	 17	105.0	18.5	 16
696	 17	162.3	21.9	 16
697	 17	166.5	17.4	 16
698	 17	305.3	42.3	 16
699	 17	83.0	16.0	 16
700	 17	116.0	12.4	 16
701	 17	100.0	14.7	 16
702	 17	320.0	44.3	 16
703	 17	171.3	27.6	 16
704	 17	142.8	18.4	 16
705	 17	109.8	15.3	 16
706	 17	104.5	22.9	 16
707	 17	130.3	21.0	 16
708	 17	96.3	16.9	 16
709	 17	124.0	20.7	 16
710	 17	110.5	16.8	 16
711	 17	110.5	16.9	 16
  0	 18	5079.8	620.2	 16
  1	 18	97.3	16.6	 16
  2	 18	75.5	12.7	 16
  3	 18	195.3	19.1	 16
  4	 18	83.5	11.0	 16
  5	 18	155.8	25.8	 16
  6	 18	134.0	18.6	 16
  7	 18	109.8	21.2	 16
  8	 18	104.8	16.4	 16
  9	 18	83.3	13.9	 16
 10	 18	77.3	9.9	 16
 11	 18	82.3	15.0	 16
 12	 18	95.3	17.5	 16
 13	 18	103.3	15.9	 16
 14	 18	87.0	16.3	 16
 15	 18	77.5	15.9	 16
 16	 18	213.5	19.5	 16
 17	 18	103.8	16.0	 16
 18	 18	240.0	33.7	 16
 19	 18	122.3	17.9	 16
 20	 18	100.8	14.4	 16
 21	 18	138.0	36.3	 16
 22	 18	95.3	20.1	 16
 23	 18	74.0	10.9	 16
 24	 18	145.0	15.9	 16
 25	 18	78.0	11.2	 16
 26	 18	112.0	14.9	 16
 27	 18	72.5	12.5	 16
 28	 18	95.0	22.9	 16
 29	 18	69.3	7.9	 16
 30	 18	78.3	17.9	 16
 31	 18	78.5	11.9	 16
 32	 18	69.3	9.2	 16
 33	 18	72.5	11.1	 16
 34	 18	118.5	20.3	 16
 35	 18	165.8	21.1	 16
 36	 18	103.5	15.4	 16
 37	 18	109.0	16.4	 16
 38	 18	91.3	14.0	 16
 39	 18	112.5	18.0	 16
 40	 18	88.3	17.5	 16
 41	 18	90.8	12.8	 16
 42	 18	71.5	11.8	 16
 43	 18	102.8	19.9	 16
 44	 18	166.3	34.1	 16
 45	 18	241.8	31.2	 16
 46	 18	131.8	21.2	 16
 47	 18	140.3	14.8	 16
 48	 18	94.5	14.7	 16
 49	 18	71.3	22.1	 16
 50	 18	83.3	13.3	 16
 51	 18	134.3	45.7	 16
 52	 18	102.8	12.5	 16
 53	 18	80.3	12.2	 16
 54	 18	76.0	10.4	 16
 55	 18	83.8	9.0	 16
 56	 18	178.8	34.2	 16
 57	 18	81.5	16.1	 16
 58	 18	90.8	20.0	 16
 59	 18	80.8	13.3	 16
 60	 18	97.0	13.4	 16
 61	 18	98.0	17.4	 16
 62	 18	79.3	14.8	 16
 63	 18	277.3	44.5	 16
 64	 18	88.8	9.9	 16
 65	 18	82.5	18.8	 16
 66	 18	99.3	16.1	 16
 67	 18	107.3	19.5	 16
 68	 18	94.5	12.6	 16
 69	 18	338.8	34.5	 16
 70	 18	307.5	57.3	 16
 71	 18	142.0	21.9	 16
 72	 18	137.5	24.0	 16
 73	 18	109.3	21.9	 16
 74	 18	117.3	17.6	 16
 75	 18	107.0	22.7	 16
 76	 18	131.5	29.8	 16
 77	 18	79.5	11.3	 16
 78	 18	113.5	16.7	 16
 79	 18	122.3	13.3	 16
 80	 18	133.3	28.2	 16
 81	 18	96.5	18.2	 16
 82	 18	78.0	12.7	 16
 83	 18	87.3	22.1	 16
 84	 18	83.8	13.8	 16
 85	 18	83.0	10.3	 16
 86	 18	89.3	11.5	 16
 87	 18	105.5	16.3	 16
 88	 18	147.3	19.8	 16
 89	 18	235.8	33.6	 16
 90	 18	104.0	18.8	 16
 91	 18	214.8	29.0	 16
 92	 18	195.8	24.6	 16
 93	 18	184.3	27.5	 16
 94	 18	76.3	11.8	 16
 95	 18	130.3	16.5	 16
 96	 18	304.5	40.8	 16
 97	 18	255.8	45.0	 16
 98	 18	138.8	25.5	 20
 99	 18	169.5	16.1	 16
100	 18	248.3	25.1	 16
101	 18	165.8	28.4	 16
102	 18	129.5	12.7	 16
103	 18	96.8	16.3	 16
104	 18	92.0	19.7	 16
105	 18	141.3	19.3	 16
106	 18	83.8	13.3	 16
107	 18	78.3	14.9	 16
108	 18	102.3	20.2	 16
109	 18	112.3	21.3	 16
110	 18	111.0	18.0	 16
111	 18	180.5	26.1	 16
112	 18	283.5	56.7	 16
113	 18	96.3	15.9	 16
114	 18	85.3	10.0	 16
115	 18	207.3	18.7	 16
116	 18	147.8	19.9	 16
117	 18	163.8	26.5	 16
118	 18	113.5	17.8	 16
119	 18	170.0	15.4	 16
120	 18	92.5	19.0	 16
121	 18	76.5	12.6	 16
122	 18	80.3	12.7	 16
123	 18	90.0	15.4	 16
124	 18	155.5	25.4	 16
125	 18	135.8	26.0	 16
126	 18	176.5	23.5	 16
127	 18	104.0	16.7	 16
128	 18	81.3	15.7	 16
129	 18	81.0	13.2	 16
130	 18	87.3	14.9	 16
131	 18	192.3	30.4	 16
132	 18	92.8	19.6	 16
133	 18	96.3	19.5	 16
134	 18	115.8	21.2	 16
135	 18	102.3	14.3	 16
136	 18	82.3	12.8	 16
137	 18	95.0	15.0	 16
138	 18	102.3	16.3	 16
139	 18	72.3	13.2	 16
140	 18	95.8	17.6	 16
141	 18	104.3	34.9	 16
142	 18	105.5	12.7	 16
143	 18	67.3	8.1	 16
144	 18	86.3	16.6	 16
145	 18	71.3	12.8	 16
146	 18	88.0	14.9	 16
147	 18	93.0	13.7	 16
148	 18	143.8	44.9	 16
149	 18	86.8	9.2	 16
150	 18	97.3	22.2	 16
151	 18	99.3	20.0	 16
152	 18	113.3	17.5	 16
153	 18	124.3	18.5	 16
154	 18	86.0	10.1	 16
155	 18	88.5	17.5	 16
156	 18	80.0	11.2	 16
157	 18	263.0	24.5	 16
158	 18	115.0	21.3	 16
159	 18	111.3	21.2	 16
160	 18	259.0	23.9	 16
161	 18	132.0	21.6	 16
162	 18	113.0	12.1	 16
163	 18	88.5	15.4	 16
164	 18	106.0	11.6	 16
165	 18	85.5	13.5	 16
166	 18	74.0	9.5	 16
167	 18	90.0	14.1	 16
168	 18	86.5	16.2	 16
169	 18	94.3	12.5	 16
170	 18	207.0	25.5	 16
171	 18	95.8	15.5	 16
172	 18	419.5	43.4	 16
173	 18	188.3	35.7	 16
174	 18	111.3	12.8	 16
175	 18	239.5	25.2	 16
176	 18	617.3	46.3	 16
177	 18	436.5	36.5	 16
178	 18	842.8	73.2	 16
179	 18	430.5	50.0	 16
180	 18	150.8	25.3	 16
181	 18	148.8	97.0	 16
182	 18	152.5	19.7	 16
183	 18	134.8	20.6	 16
184	 18	97.3	13.9	 16
185	 18	74.5	10.8	 16
186	 18	102.5	16.1	 16
187	 18	105.8	14.0	 16
188	 18	80.3	12.2	 16
189	 18	133.3	18.6	 16
190	 18	78.0	12.7	 16
191	 18	120.3	20.7	 16
192	 18	121.8	19.0	 16
193	 18	206.0	27.6	 16
194	 18	1666.3	93.2	 16
195	 18	243.0	33.3	 16
196	 18	89.0	21.7	 16
197	 18	74.3	11.0	 16
198	 18	109.3	15.4	 16
199	 18	144.8	20.7	 16
200	 18	214.3	30.4	 16
201	 18	136.0	20.1	 16
202	 18	138.8	31.9	 16
203	 18	162.0	24.8	 16
204	 18	90.5	14.9	 16
205	 18	101.3	18.9	 16
206	 18	169.3	20.1	 16
207	 18	78.0	11.2	 16
208	 18	76.0	13.4	 16
209	 18	77.3	18.2	 16
210	 18	207.3	31.2	 16
211	 18	77.8	20.6	 16
212	 18	130.0	20.0	 16
213	 18	107.3	18.6	 16
214	 18	93.5	11.5	 16
215	 18	78.3	12.7	 16
216	 18	75.5	11.5	 16
217	 18	93.3	13.3	 16
218	 18	75.5	10.0	 16
219	 18	75.5	15.2	 16
220	 18	83.5	15.2	 16
221	 18	75.5	9.2	 16
222	 18	80.8	12.6	 16
223	 18	75.0	14.7	 16
224	 18	81.8	13.6	 16
225	 18	77.3	12.8	 16
226	 18	80.8	13.5	 16
227	 18	72.0	13.8	 16
228	 18	129.8	21.6	 16
229	 18	118.5	16.0	 16
230	 18	91.3	11.0	 16
231	 18	553.8	49.6	 16
232	 18	170.0	23.7	 16
233	 18	447.0	32.9	 16
234	 18	359.8	36.9	 16
235	 18	116.8	24.3	 16
236	 18	77.8	15.0	 16
237	 18	214.0	26.4	 16
238	 18	71.3	16.5	 16
239	 18	139.5	36.3	 16
240	 18	84.5	14.7	 16
241	 18	78.5	13.2	 20
242	 18	196.0	26.5	 16
243	 18	580.0	52.9	 16
244	 18	116.8	20.2	 16
245	 18	171.5	32.7	 16
246	 18	112.5	21.5	 16
247	 18	68.8	6.7	 16
248	 18	101.0	18.5	 16
249	 18	86.8	13.3	 16
250	 18	97.5	16.9	 16
251	 18	83.3	16.8	 16
252	 18	93.3	13.4	 16
253	 18	94.5	19.5	 16
254	 18	91.0	15.0	 16
255	 18	86.3	10.9	 16
256	 18	139.8	16.9	 16
257	 18	73.8	15.3	 16
258	 18	252.5	47.5	 16
259	 18	100.5	19.1	 16
260	 18	117.5	11.0	 16
261	 18	684.0	99.5	 16
262	 18	180.0	20.9	 16
263	 18	91.0	14.5	 16
264	 18	71.0	8.2	 16
265	 18	119.5	21.0	 16
266	 18	84.3	14.6	 16
267	 18	77.8	11.4	 16
268	 18	123.3	17.6	 16
269	 18	330.0	53.4	 16
270	 18	164.0	22.1	 16
271	 18	103.0	16.7	 16
272	 18	87.0	12.6	 16
273	 18	77.0	10.0	 16
274	 18	75.0	11.9	 16
275	 18	188.0	37.5	 16
276	 18	137.5	20.4	 16
277	 18	143.5	33.0	 16
278	 18	112.0	14.8	 16
279	 18	109.3	16.8	 16
280	 18	81.0	13.2	 16
281	 18	81.3	10.5	 16
282	 18	104.3	17.6	 16
283	 18	85.5	13.1	 16
284	 18	80.3	11.6	 16
285	 18	83.8	11.9	 16
286	 18	78.5	10.2	 16
287	 18	96.5	14.1	 16
288	 18	103.3	14.5	 16
289	 18	88.0	15.2	 16
290	 18	173.8	28.4	 16
291	 18	152.5	22.9	 16
292	 18	110.8	18.9	 16
293	 18	99.3	16.9	 16
294	 18	76.0	16.4	 16
295	 18	83.0	18.4	 16
296	 18	80.5	16.4	 16
297	 18	68.3	13.0	 16
298	 18	74.0	13.3	 16
299	 18	81.5	14.2	 16
300	 18	115.3	22.3	 16
301	 18	126.3	17.9	 16
302	 18	88.5	10.2	 16
303	 18	144.3	26.1	 16
304	 18	146.3	14.6	 16
305	 18	82.3	13.5	 16
306	 18	114.3	23.4	 16
307	 18	1198.5	174.2	 16
308	 18	1119.5	119.0	 16
309	 18	854.5	194.8	 16
310	 18	121.0	19.8	 16
311	 18	106.8	14.9	 16
312	 18	128.5	15.0	 16
313	 18	137.5	13.9	 16
314	 18	134.3	16.0	 16
315	 18	194.3	28.2	 16
316	 18	568.0	60.1	 16
317	 18	87.0	10.7	 16
318	 18	97.0	19.0	 16
319	 18	83.3	13.8	 16
320	 18	81.8	19.0	 16
321	 18	86.3	13.4	 16
322	 18	101.8	20.6	 16
323	 18	110.8	37.9	 16
324	 18	78.0	12.5	 16
325	 18	74.5	11.5	 16
326	 18	83.8	21.2	 16
327	 18	101.5	19.1	 16
328	 18	78.3	16.6	 16
329	 18	92.8	12.5	 16
330	 18	102.0	12.2	 16
331	 18	136.5	11.7	 16
332	 18	104.5	16.1	 16
333	 18	117.0	24.3	 16
334	 18	88.3	12.6	 16
335	 18	168.0	22.5	 16
336	 18	154.0	20.0	 16
337	 18	72.8	13.0	 16
338	 18	142.5	22.6	 16
339	 18	631.8	97.2	 16
340	 18	92.3	10.8	 16
341	 18	69.5	9.8	 16
342	 18	183.5	19.8	 16
343	 18	88.5	12.6	 16
344	 18	113.3	11.3	 16
345	 18	110.0	10.8	 16
346	 18	102.0	11.9	 16
347	 18	250.5	27.6	 16
348	 18	178.3	18.7	 16
349	 18	214.5	25.8	 16
350	 18	80.8	15.8	 16
351	 18	92.8	14.4	 16
352	 18	714.3	48.3	 16
353	 18	99.8	23.7	 16
354	 18	210.3	30.5	 16
355	 18	89.8	13.6	 16
356	 18	92.0	15.3	 16
357	 18	95.8	14.5	 16
358	 18	95.5	13.5	 16
359	 18	103.8	20.5	 16
360	 18	104.0	13.7	 16
361	 18	140.8	19.6	 16
362	 18	99.0	22.3	 16
363	 18	140.3	15.2	 16
364	 18	160.5	27.1	 16
365	 18	113.0	17.5	 16
366	 18	127.5	52.0	 16
367	 18	76.3	9.6	 16
368	 18	74.0	11.5	 16
369	 18	173.8	17.0	 16
370	 18	78.0	13.2	 16
371	 18	70.3	13.7	 16
372	 18	106.5	12.1	 16
373	 18	81.5	10.2	 16
374	 18	76.8	12.5	 16
375	 18	88.5	11.0	 16
376	 18	84.3	15.1	 16
377	 18	127.5	24.0	 16
378	 18	75.3	11.9	 16
379	 18	75.5	10.3	 16
380	 18	85.0	10.5	 16
381	 18	224.5	41.5	 16
382	 18	93.0	17.4	 16
383	 18	172.8	31.7	 20
384	 18	123.0	18.1	 16
385	 18	807.0	61.9	 16
386	 18	208.8	37.2	 16
387	 18	139.8	22.8	 16
388	 18	76.8	14.2	 16
389	 18	144.5	16.4	 16
390	 18	81.3	13.0	 16
391	 18	100.8	15.4	 16
392	 18	76.5	9.2	 16
393	 18	80.5	10.4	 16
394	 18	124.5	18.0	 16
395	 18	190.8	24.1	 16
396	 18	117.5	8.3	 16
397	 18	79.3	31.7	 16
398	 18	82.3	15.0	 16
399	 18	87.5	12.2	 16
400	 18	78.0	10.9	 16
401	 18	88.3	14.5	 16
402	 18	212.8	98.1	 16
403	 18	142.3	21.0	 16
404	 18	297.5	25.4	 16
405	 18	85.3	11.0	 16
406	 18	99.0	29.8	 16
407	 18	113.5	20.2	 16
408	 18	77.3	28.0	 16
409	 18	80.0	16.5	 16
410	 18	85.8	21.6	 16
411	 18	80.5	15.1	 16
412	 18	121.0	16.8	 16
413	 18	117.3	18.2	 16
414	 18	155.3	27.9	 16
415	 18	87.0	16.7	 16
416	 18	79.5	16.1	 16
417	 18	75.5	12.3	 16
418	 18	93.0	14.5	 16
419	 18	83.3	14.0	 16
420	 18	97.0	11.8	 16
421	 18	80.8	13.5	 16
422	 18	212.3	20.2	 16
423	 18	167.5	25.0	 16
424	 18	158.3	21.5	 16
425	 18	108.3	15.3	 16
426	 18	195.5	23.3	 16
427	 18	117.8	20.1	 16
428	 18	73.0	11.3	 16
429	 18	79.3	14.3	 16
430	 18	190.3	18.9	 16
431	 18	214.8	38.6	 16
432	 18	168.3	28.0	 16
433	 18	72.0	12.1	 16
434	 18	102.8	13.1	 16
435	 18	85.8	12.2	 16
436	 18	91.0	16.8	 16
437	 18	101.5	17.1	 16
438	 18	110.3	18.6	 16
439	 18	78.0	18.8	 16
440	 18	111.3	25.7	 16
441	 18	98.0	13.4	 16
442	 18	228.3	30.6	 16
443	 18	225.8	25.3	 16
444	 18	136.5	20.3	 16
445	 18	110.5	14.9	 16
446	 18	108.8	15.0	 16
447	 18	85.3	14.7	 16
448	 18	92.8	18.6	 16
449	 18	77.8	14.4	 16
450	 18	90.3	19.0	 16
451	 18	86.3	14.8	 16
452	 18	184.5	33.1	 16
453	 18	126.5	15.9	 16
454	 18	88.3	14.1	 16
455	 18	97.0	12.3	 16
456	 18	80.0	12.1	 16
457	 18	69.5	16.6	 16
458	 18	92.5	16.2	 16
459	 18	95.8	17.0	 16
460	 18	102.5	23.3	 16
461	 18	86.3	13.2	 16
462	 18	172.3	63.5	 16
463	 18	129.3	18.4	 16
464	 18	141.5	29.8	 16
465	 18	128.8	24.3	 16
466	 18	64.8	9.9	 16
467	 18	251.5	40.1	 16
468	 18	100.8	12.8	 16
469	 18	78.8	9.5	 16
470	 18	135.8	24.9	 16
471	 18	91.3	16.2	 16
472	 18	89.5	16.5	 16
473	 18	75.3	11.0	 16
474	 18	95.3	11.0	 16
475	 18	408.0	48.7	 16
476	 18	97.8	14.7	 16
477	 18	67.8	11.8	 16
478	 18	177.3	18.0	 16
479	 18	285.5	32.1	 16
480	 18	135.8	20.7	 16
481	 18	111.5	18.9	 16
482	 18	338.3	39.7	 16
483	 18	159.0	15.7	 16
484	 18	124.3	33.2	 16
485	 18	191.0	22.0	 16
486	 18	89.3	13.0	 16
487	 18	257.8	25.9	 16
488	 18	101.5	34.5	 16
489	 18	96.0	15.8	 16
490	 18	132.3	17.7	 16
491	 18	86.8	15.6	 16
492	 18	76.5	12.5	 16
493	 18	118.0	18.7	 16
494	 18	458.0	49.4	 16
495	 18	213.5	27.0	 16
496	 18	120.0	17.4	 16
497	 18	87.0	10.8	 16
498	 18	191.8	20.2	 16
499	 18	97.0	15.2	 16
500	 18	83.3	11.9	 16
501	 18	80.3	10.6	 16
502	 18	94.3	14.8	 16
503	 18	92.5	15.7	 16
504	 18	81.0	9.2	 16
505	 18	68.8	9.1	 16
506	 18	69.5	8.1	 16
507	 18	73.5	14.8	 16
508	 18	78.0	15.3	 16
509	 18	68.3	10.2	 16
510	 18	87.3	9.2	 16
511	 18	190.3	19.6	 16
512	 18	76.0	14.2	 16
513	 18	75.3	9.1	 16
514	 18	71.3	6.8	 16
515	 18	153.5	24.4	 16
516	 18	98.0	9.0	 16
517	 18	82.5	9.5	 16
518	 18	84.3	14.3	 16
519	 18	69.5	8.6	 16
520	 18	75.3	12.6	 16
521	 18	80.5	12.6	 16
522	 18	83.0	13.3	 16
523	 18	163.3	20.2	 16
524	 18	65.3	11.1	 16
525	 18	88.8	17.3	 16
526	 18	82.3	13.1	 20
527	 18	75.0	16.6	 16
528	 18	154.5	22.9	 16
529	 18	75.8	15.1	 16
530	 18	86.8	12.2	 16
531	 18	92.5	11.5	 16
532	 18	78.3	10.3	 16
533	 18	109.8	14.3	 16
534	 18	117.8	20.9	 16
535	 18	98.3	36.0	 16
536	 18	83.5	14.2	 16
537	 18	80.3	12.8	 16
538	 18	80.8	12.3	 16
539	 18	80.5	12.0	 16
540	 18	168.3	17.1	 16
541	 18	299.8	33.1	 16
542	 18	227.5	26.5	 16
543	 18	114.3	16.5	 16
544	 18	72.3	13.5	 16
545	 18	142.5	16.3	 16
546	 18	180.3	23.0	 16
547	 18	165.8	23.2	 16
548	 18	104.3	19.5	 16
549	 18	124.8	28.7	 16
550	 18	330.3	62.5	 16
551	 18	102.5	14.7	 16
552	 18	124.5	12.8	 16
553	 18	88.0	11.4	 16
554	 18	107.8	14.2	 16
555	 18	123.3	11.1	 16
556	 18	147.5	19.7	 16
557	 18	84.8	10.2	 16
558	 18	101.5	16.8	 16
559	 18	713.3	61.8	 16
560	 18	93.8	15.9	 16
561	 18	79.5	14.4	 16
562	 18	85.3	15.6	 16
563	 18	216.3	34.5	 16
564	 18	247.3	39.9	 16
565	 18	79.3	7.8	 16
566	 18	89.5	14.4	 16
567	 18	97.0	12.7	 16
568	 18	80.8	9.3	 16
569	 18	108.0	17.3	 16
570	 18	80.8	10.1	 16
571	 18	77.3	9.2	 16
572	 18	78.8	10.1	 16
573	 18	165.3	27.8	 16
574	 18	114.5	18.5	 16
575	 18	476.8	34.8	 16
576	 18	334.3	49.8	 16
577	 18	148.5	28.6	 16
578	 18	91.5	16.1	 16
579	 18	98.8	9.3	 16
580	 18	530.8	41.6	 16
581	 18	192.5	27.5	 16
582	 18	201.5	23.9	 16
583	 18	78.0	6.8	 16
584	 18	304.0	39.3	 16
585	 18	242.5	23.0	 16
586	 18	128.5	16.9	 16
587	 18	83.3	15.8	 16
588	 18	72.0	15.1	 16
589	 18	145.8	24.0	 16
590	 18	152.3	26.2	 16
591	 18	78.8	9.7	 16
592	 18	95.0	10.0	 16
593	 18	79.8	17.7	 16
594	 18	83.3	15.7	 16
595	 18	101.3	15.9	 16
596	 18	406.3	45.6	 16
597	 18	158.5	14.2	 16
598	 18	87.5	21.6	 16
599	 18	113.0	26.4	 16
600	 18	109.0	18.6	 16
601	 18	441.3	32.8	 16
602	 18	944.8	86.7	 16
603	 18	147.0	23.0	 16
604	 18	181.5	24.6	 16
605	 18	122.8	16.6	 16
606	 18	116.8	15.5	 16
607	 18	92.5	13.0	 16
608	 18	126.0	15.7	 16
609	 18	85.0	12.6	 16
610	 18	76.8	9.9	 16
611	 18	129.3	19.2	 16
612	 18	69.5	9.5	 16
613	 18	67.0	8.8	 16
614	 18	80.8	10.3	 16
615	 18	200.0	26.4	 16
616	 18	185.5	39.5	 16
617	 18	148.0	16.8	 16
618	 18	153.0	21.2	 16
619	 18	86.5	16.8	 16
620	 18	436.0	46.6	 16
621	 18	120.8	10.6	 16
622	 18	423.5	34.7	 16
623	 18	119.3	15.4	 16
624	 18	194.0	32.4	 16
625	 18	440.5	46.5	 16
626	 18	101.0	14.8	 16
627	 18	81.3	8.8	 16
628	 18	269.3	30.4	 16
629	 18	185.5	17.9	 16
630	 18	132.5	20.5	 16
631	 18	111.3	12.4	 16
632	 18	77.0	8.8	 16
633	 18	90.5	13.1	 16
634	 18	83.5	9.1	 16
635	 18	113.5	14.8	 16
636	 18	86.5	16.0	 16
637	 18	85.0	11.1	 16
638	 18	92.3	15.5	 16
639	 18	231.3	26.4	 16
640	 18	113.5	19.0	 16
641	 18	92.0	14.4	 16
642	 18	149.8	19.3	 16
643	 18	140.0	13.0	 16
644	 18	82.5	17.3	 16
645	 18	74.5	10.4	 16
646	 18	107.5	16.8	 16
647	 18	155.0	18.7	 16
648	 18	184.0	33.3	 16
649	 18	176.8	28.0	 16
650	 18	125.3	22.9	 16
651	 18	68.0	12.6	 16
652	 18	100.3	14.3	 16
653	 18	115.3	13.2	 16
654	 18	107.5	19.6	 16
655	 18	72.0	9.0	 16
656	 18	73.3	11.0	 16
657	 18	194.0	20.3	 16
658	 18	65.0	14.0	 16
659	 18	91.5	12.8	 16
660	 18	78.0	15.7	 16
661	 18	81.3	18.5	 16
662	 18	81.8	14.7	 16
663	 18	79.3	10.7	 16
664	 18	82.0	11.3	 16
665	 18	86.5	6.8	 16
666	 18	125.5	15.5	 16
667	 18	83.3	15.1	 16
668	 18	86.3	24.1	 20
669	 18	72.5	8.4	 16
670	 18	72.3	10.6	 16
671	 18	384.3	27.4	 16
672	 18	335.3	65.8	 16
673	 18	72.3	13.5	 16
674	 18	107.0	16.8	 16
675	 18	352.5	42.0	 16
676	 18	171.0	41.5	 16
677	 18	609.5	34.6	 16
678	 18	89.3	10.0	 16
679	 18	95.3	11.2	 16
680	 18	79.8	10.7	 16
681	 18	125.3	20.8	 16
682	 18	107.3	13.7	 16
683	 18	94.0	12.1	 16
684	 18	129.0	26.8	 16
685	 18	135.8	14.7	 16
686	 18	126.0	18.5	 16
687	 18	203.0	33.8	 16
688	 18	443.3	41.4	 16
689	 18	84.0	14.1	 16
690	 18	104.0	15.8	 16
691	 18	95.0	16.7	 16
692	 18	129.8	16.5	 16
693	 18	179.5	18.9	 16
694	 18	81.3	15.8	 16
695	 18	126.0	69.4	 16
696	 18	804.0	105.6	 16
697	 18	107.8	19.0	 16
698	 18	124.3	10.6	 16
699	 18	84.3	14.4	 16
700	 18	75.3	17.4	 16
701	 18	87.3	13.8	 16
702	 18	291.5	37.9	 16
703	 18	85.3	12.9	 16
704	 18	222.5	37.6	 16
705	 18	167.0	21.6	 16
706	 18	116.0	15.3	 16
707	 18	143.5	22.0	 16
708	 18	73.3	11.6	 16
709	 18	1652.3	2127.7	 16
710	 18	741.5	89.6	 16
711	 18	6116.0	462.9	 16
  0	 19	113.5	17.7	 16
  1	 19	118.8	22.0	 16
  2	 19	97.5	11.5	 16
  3	 19	269.5	29.3	 16
  4	 19	180.5	30.7	 16
  5	 19	134.0	21.9	 16
  6	 19	83.3	12.7	 16
  7	 19	87.3	14.2	 16
  8	 19	131.3	17.1	 16
  9	 19	72.3	13.0	 16
 10	 19	83.0	11.3	 16
 11	 19	195.3	27.3	 16
 12	 19	214.8	28.2	 16
 13	 19	158.8	17.7	 16
 14	 19	247.3	27.2	 16
 15	 19	212.3	21.2	 16
 16	 19	327.8	35.2	 16
 17	 19	190.3	27.8	 16
 18	 19	200.5	25.7	 16
 19	 19	172.8	24.8	 16
 20	 19	93.3	12.4	 16
 21	 19	155.5	20.3	 16
 22	 19	236.3	33.5	 16
 23	 19	274.8	42.9	 16
 24	 19	558.3	50.7	 16
 25	 19	122.3	21.3	 16
 26	 19	128.8	27.1	 16
 27	 19	378.5	71.7	 16
 28	 19	82.5	12.8	 16
 29	 19	75.0	11.4	 16
 30	 19	86.8	13.0	 16
 31	 19	198.5	30.8	 16
 32	 19	85.3	11.5	 16
 33	 19	90.3	16.3	 16
 34	 19	157.5	19.4	 16
 35	 19	194.3	37.1	 16
 36	 19	334.0	97.3	 16
 37	 19	168.3	25.4	 16
 38	 19	2301.8	244.7	 16
 39	 19	446.3	46.3	 16
 40	 19	166.3	18.6	 16
 41	 19	98.8	13.2	 16
 42	 19	80.0	11.9	 16
 43	 19	125.0	15.4	 16
 44	 19	580.0	190.7	 16
 45	 19	105.3	11.1	 16
 46	 19	216.3	37.1	 16
 47	 19	346.5	36.0	 16
 48	 19	191.8	23.2	 16
 49	 19	1012.0	112.4	 16
 50	 19	93.0	13.9	 16
 51	 19	230.5	27.3	 16
 52	 19	109.8	15.4	 16
 53	 19	292.8	34.2	 16
 54	 19	93.8	18.9	 16
 55	 19	391.3	62.3	 16
 56	 19	513.8	63.6	 16
 57	 19	126.0	17.6	 16
 58	 19	263.8	21.1	 16
 59	 19	347.5	40.2	 16
 60	 19	238.5	25.8	 16
 61	 19	289.0	31.2	 16
 62	 19	206.8	34.2	 16
 63	 19	358.3	33.7	 16
 64	 19	260.0	35.8	 16
 65	 19	156.5	19.8	 16
 66	 19	122.3	17.4	 16
 67	 19	85.8	13.2	 16
 68	 19	111.8	17.0	 16
 69	 19	237.3	25.3	 16
 70	 19	496.0	52.9	 16
 71	 19	873.5	106.7	 16
 72	 19	273.0	19.4	 16
 73	 19	353.3	42.9	 16
 74	 19	365.8	29.3	 16
 75	 19	94.5	18.5	 16
 76	 19	110.5	10.2	 16
 77	 19	371.3	42.7	 16
 78	 19	148.3	26.1	 16
 79	 19	95.3	16.1	 16
 80	 19	96.5	15.3	 16
 81	 19	96.3	18.9	 16
 82	 19	104.5	16.0	 16
 83	 19	536.8	56.1	 16
 84	 19	127.8	16.4	 16
 85	 19	291.0	42.1	 16
 86	 19	143.5	20.5	 16
 87	 19	2131.3	206.0	 16
 88	 19	153.0	27.3	 16
 89	 19	126.3	20.2	 16
 90	 19	789.8	66.9	 16
 91	 19	206.3	29.2	 16
 92	 19	84.3	14.6	 16
 93	 19	94.5	16.7	 16
 94	 19	143.0	26.2	 16
 95	 19	350.5	53.8	 16
 96	 19	895.0	53.8	 16
 97	 19	113.0	15.0	 16
 98	 19	142.0	26.4	 16
 99	 19	103.3	18.2	 16
100	 19	156.5	47.1	 16
101	 19	145.0	23.1	 16
102	 19	655.0	42.7	 16
103	 19	333.5	40.2	 16
104	 19	189.5	43.7	 16
105	 19	318.8	40.5	 16
106	 19	216.0	38.3	 16
107	 19	211.8	25.6	 16
108	 19	91.5	15.9	 20
109	 19	138.0	56.0	 16
110	 19	125.3	17.4	 16
111	 19	282.3	34.6	 16
112	 19	205.5	32.6	 16
113	 19	829.0	169.7	 16
114	 19	91.0	15.1	 16
115	 19	97.8	12.9	 16
116	 19	83.3	11.5	 16
117	 19	74.0	10.9	 16
118	 19	93.5	13.0	 16
119	 19	1009.5	232.1	 16
120	 19	82.3	16.8	 16
121	 19	75.3	12.9	 16
122	 19	92.3	13.7	 16
123	 19	102.0	20.5	 16
124	 19	120.8	18.5	 16
125	 19	128.0	20.8	 16
126	 19	251.5	24.7	 16
127	 19	556.8	48.3	 16
128	 19	135.0	18.8	 16
129	 19	108.5	13.5	 16
130	 19	109.3	16.3	 16
131	 19	510.5	78.8	 16
132	 19	154.3	19.9	 16
133	 19	86.3	14.6	 16
134	 19	148.0	32.8	 16
135	 19	90.3	14.5	 16
136	 19	81.0	14.7	 16
137	 19	314.3	89.5	 16
138	 19	158.0	52.5	 16
139	 19	306.8	27.3	 16
140	 19	116.3	20.7	 16
141	 19	552.0	79.4	 16
142	 19	87.0	11.6	 16
143	 19	190.0	31.1	 16
144	 19	73.8	11.2	 16
145	 19	283.8	47.9	 16
146	 19	122.3	21.2	 16
147	 19	94.3	11.6	 16
148	 19	80.8	13.8	 16
149	 19	102.0	14.0	 16
150	 19	199.8	27.5	 16
151	 19	186.0	28.2	 16
152	 19	127.3	23.0	 16
153	 19	288.3	52.2	 16
154	 19	709.5	107.9	 16
155	 19	184.5	23.4	 16
156	 19	101.0	16.0	 16
157	 19	368.5	24.0	 16
158	 19	466.3	88.8	 16
159	 19	162.0	19.5	 16
160	 19	335.0	30.7	 16
161	 19	106.0	17.3	 16
162	 19	187.0	18.7	 16
163	 19	405.0	47.1	 16
164	 19	198.3	24.1	 16
165	 19	95.0	15.2	 16
166	 19	201.5	23.0	 16
167	 19	129.0	29.2	 16
168	 19	300.8	39.4	 16
169	 19	81.5	10.7	 16
170	 19	414.3	75.0	 16
171	 19	182.0	24.0	 16
172	 19	141.5	14.1	 16
173	 19	588.0	56.6	 16
174	 19	226.5	31.5	 16
175	 19	84.0	10.6	 16
176	 19	154.8	20.3	 16
177	 19	71.3	11.1	 16
178	 19	246.8	29.7	 16
179	 19	175.8	26.4	 16
180	 19	260.0	29.3	 16
181	 19	178.3	29.7	 16
182	 19	132.0	52.2	 16
183	 19	366.8	61.3	 16
184	 19	110.8	18.3	 16
185	 19	176.0	20.0	 16
186	 19	200.0	22.3	 16
187	 19	467.3	51.8	 16
188	 19	84.5	10.9	 16
189	 19	71.0	9.6	 16
190	 19	156.8	21.6	 16
191	 19	274.8	36.0	 16
192	 19	289.3	35.0	 16
193	 19	194.5	25.3	 16
194	 19	110.8	26.8	 16
195	 19	615.0	98.2	 16
196	 19	82.0	13.7	 16
197	 19	114.3	17.2	 16
198	 19	142.3	32.5	 16
199	 19	310.0	28.5	 16
200	 19	380.3	39.8	 16
201	 19	355.0	27.8	 16
202	 19	208.8	20.2	 16
203	 19	192.0	28.5	 16
204	 19	189.8	27.7	 16
205	 19	198.0	26.7	 16
206	 19	72.5	8.7	 16
207	 19	86.3	13.6	 16
208	 19	559.0	58.8	 16
209	 19	82.3	15.2	 16
210	 19	90.0	12.6	 16
211	 19	89.8	11.3	 16
212	 19	64.0	7.2	 16
213	 19	100.5	13.1	 16
214	 19	94.0	14.4	 16
215	 19	933.0	81.6	 16
216	 19	99.3	11.7	 16
217	 19	543.3	75.9	 16
218	 19	165.8	20.3	 16
219	 19	87.0	10.5	 16
220	 19	87.0	11.8	 16
221	 19	111.8	27.7	 16
222	 19	299.8	51.0	 16
223	 19	68.3	8.0	 16
224	 19	252.5	29.0	 16
225	 19	70.0	13.2	 16
226	 19	100.8	21.2	 16
227	 19	209.3	21.2	 16
228	 19	103.0	13.5	 16
229	 19	2330.8	194.8	 16
230	 19	222.5	34.0	 16
231	 19	477.3	37.9	 16
232	 19	91.3	13.5	 16
233	 19	83.3	13.2	 16
234	 19	77.3	19.4	 16
235	 19	257.5	33.4	 16
236	 19	182.0	22.8	 16
237	 19	106.3	39.5	 16
238	 19	282.3	27.2	 16
239	 19	76.8	9.8	 16
240	 19	144.5	18.2	 16
241	 19	138.3	23.4	 16
242	 19	82.3	13.3	 16
243	 19	106.8	15.1	 16
244	 19	135.5	24.0	 16
245	 19	109.8	15.2	 16
246	 19	142.8	18.3	 16
247	 19	72.3	13.6	 16
248	 19	1229.8	144.4	 16
249	 19	87.0	13.7	 16
250	 19	82.5	19.8	 20
251	 19	71.8	8.9	 16
252	 19	84.8	16.1	 16
253	 19	86.0	17.9	 16
254	 19	96.5	15.6	 16
255	 19	87.8	12.7	 16
256	 19	100.3	31.2	 16
257	 19	153.3	22.6	 16
258	 19	86.0	10.8	 16
259	 19	369.8	61.1	 16
260	 19	170.0	24.8	 16
261	 19	333.3	32.6	 16
262	 19	292.3	36.0	 16
263	 19	80.3	12.5	 16
264	 19	192.8	26.5	 16
265	 19	113.0	13.6	 16
266	 19	216.0	38.0	 16
267	 19	138.0	19.3	 16
268	 19	118.0	15.6	 16
269	 19	232.0	35.4	 16
270	 19	216.8	32.1	 16
271	 19	1069.3	140.6	 16
272	 19	437.8	54.0	 16
273	 19	99.5	16.0	 16
274	 19	127.0	15.5	 16
275	 19	195.5	27.1	 16
276	 19	239.8	43.2	 16
277	 19	70.0	12.4	 16
278	 19	182.8	19.6	 16
279	 19	98.5	25.0	 16
280	 19	161.0	22.3	 16
281	 19	84.5	16.6	 16
282	 19	71.0	10.7	 16
283	 19	86.3	15.4	 16
284	 19	89.0	17.4	 16
285	 19	79.3	13.1	 16
286	 19	91.3	12.6	 16
287	 19	160.3	25.5	 16
288	 19	86.0	15.4	 16
289	 19	226.3	40.1	 16
290	 19	348.3	30.5	 16
291	 19	334.3	54.2	 16
292	 19	89.3	13.7	 16
293	 19	221.5	34.1	 16
294	 19	215.3	22.1	 16
295	 19	101.0	13.2	 16
296	 19	86.5	8.6	 16
297	 19	85.0	22.6	 16
298	 19	84.3	14.4	 16
299	 19	110.8	16.1	 16
300	 19	74.3	9.2	 16
301	 19	92.8	14.9	 16
302	 19	216.3	32.4	 16
303	 19	283.3	26.6	 16
304	 19	309.0	37.2	 16
305	 19	88.5	14.9	 16
306	 19	188.3	22.0	 16
307	 19	130.0	19.6	 16
308	 19	134.5	15.2	 16
309	 19	103.5	17.4	 16
310	 19	289.5	44.5	 16
311	 19	87.8	17.4	 16
312	 19	703.3	70.1	 16
313	 19	83.0	12.4	 16
314	 19	136.0	14.8	 16
315	 19	169.0	27.7	 16
316	 19	87.5	14.1	 16
317	 19	427.8	45.9	 16
318	 19	180.3	18.9	 16
319	 19	126.8	18.0	 16
320	 19	193.3	22.7	 16
321	 19	397.8	30.8	 16
322	 19	100.8	16.1	 16
323	 19	101.8	16.7	 16
324	 19	175.3	22.9	 16
325	 19	83.3	11.3	 16
326	 19	568.5	64.6	 16
327	 19	101.0	13.2	 16
328	 19	84.0	15.1	 16
329	 19	71.8	10.7	 16
330	 19	85.8	13.8	 16
331	 19	108.0	15.3	 16
332	 19	86.5	11.1	 16
333	 19	395.8	48.1	 16
334	 19	125.0	11.9	 16
335	 19	459.3	46.7	 16
336	 19	78.3	10.4	 16
337	 19	74.3	12.5	 16
338	 19	213.5	21.0	 16
339	 19	86.8	14.6	 16
340	 19	93.8	15.7	 16
341	 19	77.3	11.4	 16
342	 19	77.5	13.8	 16
343	 19	91.3	12.7	 16
344	 19	76.8	14.6	 16
345	 19	72.3	10.6	 16
346	 19	79.5	17.0	 16
347	 19	80.8	12.8	 16
348	 19	118.0	11.6	 16
349	 19	198.8	32.6	 16
350	 19	87.3	12.2	 16
351	 19	169.8	15.0	 16
352	 19	99.5	12.2	 16
353	 19	219.3	33.8	 16
354	 19	97.8	14.4	 16
355	 19	155.5	22.0	 16
356	 19	144.3	20.7	 16
357	 19	520.3	57.8	 16
358	 19	6096.8	508.4	 16
359	 19	261.5	27.6	 16
360	 19	125.8	20.3	 16
361	 19	597.8	49.1	 16
362	 19	131.0	17.4	 16
363	 19	110.3	13.1	 16
364	 19	170.8	20.1	 16
365	 19	112.0	19.4	 16
366	 19	135.8	15.9	 16
367	 19	82.3	9.4	 16
368	 19	93.3	16.4	 16
369	 19	161.8	20.4	 16
370	 19	90.3	24.8	 16
371	 19	97.3	10.3	 16
372	 19	111.0	24.4	 16
373	 19	530.5	68.7	 16
374	 19	161.5	29.9	 16
375	 19	83.3	11.1	 16
376	 19	148.8	18.7	 16
377	 19	210.0	23.1	 16
378	 19	86.0	11.8	 16
379	 19	93.8	16.8	 16
380	 19	2360.3	287.2	 16
381	 19	304.8	41.4	 16
382	 19	91.5	15.1	 16
383	 19	128.8	22.0	 16
384	 19	870.5	167.5	 16
385	 19	163.3	53.8	 16
386	 19	97.0	12.5	 16
387	 19	427.5	63.8	 16
388	 19	146.0	16.0	 16
389	 19	82.0	16.6	 16
390	 19	105.3	10.6	 16
391	 19	97.3	16.0	 16
392	 19	132.3	20.4	 20
393	 19	287.5	47.8	 16
394	 19	82.0	12.3	 16
395	 19	175.3	23.1	 16
396	 19	139.8	11.7	 16
397	 19	89.5	23.1	 16
398	 19	93.3	17.3	 16
399	 19	195.3	25.0	 16
400	 19	980.8	203.8	 16
401	 19	79.8	14.2	 16
402	 19	242.3	35.5	 16
403	 19	138.3	21.1	 16
404	 19	98.3	15.4	 16
405	 19	90.3	12.7	 16
406	 19	97.0	15.2	 16
407	 19	148.5	20.0	 16
408	 19	1065.0	107.0	 16
409	 19	3442.8	371.6	 16
410	 19	86.3	13.7	 16
411	 19	104.0	16.1	 16
412	 19	193.5	25.7	 16
413	 19	92.8	12.6	 16
414	 19	172.3	17.3	 16
415	 19	86.8	13.3	 16
416	 19	150.3	23.3	 16
417	 19	83.0	11.6	 16
418	 19	639.3	71.9	 16
419	 19	80.5	11.1	 16
420	 19	258.3	26.3	 16
421	 19	77.8	13.8	 16
422	 19	129.5	15.1	 16
423	 19	244.3	23.7	 16
424	 19	414.8	53.7	 16
425	 19	490.5	55.3	 16
426	 19	117.0	14.8	 16
427	 19	125.0	17.3	 16
428	 19	287.8	33.1	 16
429	 19	161.3	22.4	 16
430	 19	81.5	12.7	 16
431	 19	260.0	36.9	 16
432	 19	123.0	12.9	 16
433	 19	125.3	17.8	 16
434	 19	1980.3	246.6	 16
435	 19	80.3	13.0	 16
436	 19	143.0	16.9	 16
437	 19	189.3	24.9	 16
438	 19	80.3	12.7	 16
439	 19	69.8	14.2	 16
440	 19	100.0	16.0	 16
441	 19	258.3	32.9	 16
442	 19	111.3	14.9	 16
443	 19	169.3	18.8	 16
444	 19	359.5	34.8	 16
445	 19	198.0	26.6	 16
446	 19	227.8	50.5	 16
447	 19	94.3	16.1	 16
448	 19	113.0	13.2	 16
449	 19	111.0	11.6	 16
450	 19	74.5	14.6	 16
451	 19	149.3	21.5	 16
452	 19	109.0	44.6	 16
453	 19	81.0	11.9	 16
454	 19	91.3	17.1	 16
455	 19	83.5	16.0	 16
456	 19	161.0	24.3	 16
457	 19	88.0	13.5	 16
458	 19	556.8	106.7	 16
459	 19	84.5	14.0	 16
460	 19	85.8	13.5	 16
461	 19	83.3	15.1	 16
462	 19	121.5	24.7	 16
463	 19	92.0	15.8	 16
464	 19	92.0	17.8	 16
465	 19	70.5	10.3	 16
466	 19	72.3	12.7	 16
467	 19	67.3	8.1	 16
468	 19	375.5	39.1	 16
469	 19	131.5	16.5	 16
470	 19	1361.8	195.1	 16
471	 19	335.8	47.7	 16
472	 19	170.8	74.8	 16
473	 19	133.8	17.4	 16
474	 19	67.5	7.6	 16
475	 19	207.3	28.3	 16
476	 19	255.8	35.1	 16
477	 19	78.3	14.5	 16
478	 19	138.3	16.3	 16
479	 19	115.3	16.5	 16
480	 19	150.3	27.9	 16
481	 19	82.3	12.8	 16
482	 19	104.3	20.7	 16
483	 19	83.3	14.2	 16
484	 19	85.0	15.6	 16
485	 19	499.0	54.5	 16
486	 19	499.3	55.7	 16
487	 19	316.5	44.4	 16
488	 19	644.3	71.5	 16
489	 19	135.8	16.4	 16
490	 19	119.3	16.0	 16
491	 19	144.3	16.3	 16
492	 19	100.8	19.0	 16
493	 19	128.0	20.3	 16
494	 19	101.3	12.6	 16
495	 19	103.3	15.2	 16
496	 19	1376.8	116.0	 16
497	 19	165.8	19.2	 16
498	 19	866.0	71.0	 16
499	 19	104.3	14.3	 16
500	 19	78.5	10.6	 16
501	 19	102.3	17.6	 16
502	 19	106.0	14.7	 16
503	 19	277.0	35.2	 16
504	 19	101.3	13.7	 16
505	 19	110.5	20.7	 16
506	 19	107.8	13.4	 16
507	 19	313.8	32.6	 16
508	 19	99.8	16.4	 16
509	 19	670.3	85.0	 16
510	 19	143.5	13.8	 16
511	 19	158.5	25.2	 16
512	 19	80.8	14.2	 16
513	 19	71.5	14.9	 16
514	 19	259.0	52.3	 16
515	 19	84.0	9.7	 16
516	 19	98.5	15.2	 16
517	 19	339.0	51.6	 16
518	 19	74.3	13.5	 16
519	 19	77.0	12.3	 16
520	 19	73.5	19.5	 16
521	 19	81.8	12.1	 16
522	 19	79.8	14.0	 16
523	 19	426.5	53.5	 16
524	 19	88.8	15.9	 16
525	 19	112.8	16.4	 16
526	 19	207.0	32.9	 16
527	 19	114.3	18.1	 16
528	 19	126.8	16.0	 16
529	 19	278.5	25.7	 16
530	 19	141.5	21.1	 16
531	 19	417.0	120.4	 16
532	 19	178.0	26.0	 16
533	 19	155.8	20.0	 16
534	 19	106.3	17.9	 16
535	 19	148.8	24.6	 20
536	 19	80.3	14.8	 16
537	 19	106.3	12.1	 16
538	 19	84.3	12.7	 16
539	 19	192.3	22.6	 16
540	 19	243.3	42.1	 16
541	 19	96.5	12.4	 16
542	 19	114.0	14.0	 16
543	 19	186.5	33.8	 16
544	 19	88.0	12.9	 16
545	 19	175.3	32.8	 16
546	 19	104.5	14.9	 16
547	 19	86.0	10.9	 16
548	 19	138.0	23.4	 16
549	 19	217.3	43.5	 16
550	 19	94.0	15.9	 16
551	 19	107.8	17.8	 16
552	 19	68.0	7.5	 16
553	 19	138.0	21.5	 16
554	 19	92.3	15.0	 16
555	 19	70.0	11.8	 16
556	 19	144.8	38.3	 16
557	 19	531.0	73.3	 16
558	 19	90.0	9.1	 16
559	 19	983.0	73.6	 16
560	 19	204.8	22.7	 16
561	 19	78.8	18.5	 16
562	 19	146.5	24.3	 16
563	 19	237.3	35.6	 16
564	 19	88.5	12.2	 16
565	 19	68.5	12.8	 16
566	 19	523.8	49.1	 16
567	 19	91.8	14.1	 16
568	 19	705.0	61.6	 16
569	 19	97.0	12.6	 16
570	 19	76.5	13.4	 16
571	 19	115.0	21.4	 16
572	 19	108.0	16.6	 16
573	 19	88.0	15.9	 16
574	 19	171.0	24.8	 16
575	 19	99.8	14.4	 16
576	 19	104.3	16.3	 16
577	 19	88.3	14.7	 16
578	 19	93.5	13.1	 16
579	 19	273.0	35.5	 16
580	 19	464.0	41.1	 16
581	 19	403.0	29.4	 16
582	 19	125.3	18.6	 16
583	 19	215.0	26.0	 16
584	 19	119.3	16.6	 16
585	 19	116.5	17.8	 16
586	 19	669.8	95.5	 16
587	 19	1758.3	336.0	 16
588	 19	196.3	30.8	 16
589	 19	78.0	10.6	 16
590	 19	167.0	25.2	 16
591	 19	158.5	25.9	 16
592	 19	130.5	14.8	 16
593	 19	249.8	23.5	 16
594	 19	76.0	8.8	 16
595	 19	76.3	12.8	 16
596	 19	455.3	70.5	 16
597	 19	1233.5	123.9	 16
598	 19	77.5	12.1	 16
599	 19	182.0	25.4	 16
600	 19	119.8	43.0	 16
601	 19	99.5	15.2	 16
602	 19	303.0	24.2	 16
603	 19	161.3	19.1	 16
604	 19	103.3	20.6	 16
605	 19	129.5	18.4	 16
606	 19	105.0	16.5	 16
607	 19	263.3	20.0	 16
608	 19	410.5	32.9	 16
609	 19	104.5	18.2	 16
610	 19	103.8	19.7	 16
611	 19	80.5	12.2	 16
612	 19	81.3	11.3	 16
613	 19	125.0	16.0	 16
614	 19	268.5	45.9	 16
615	 19	476.3	47.0	 16
616	 19	473.3	39.8	 16
617	 19	1055.3	68.0	 16
618	 19	136.5	18.4	 16
619	 19	84.5	12.0	 16
620	 19	84.0	14.5	 16
621	 19	87.3	13.8	 16
622	 19	275.8	38.6	 16
623	 19	113.0	17.6	 16
624	 19	190.8	19.9	 16
625	 19	126.5	20.3	 16
626	 19	148.3	23.8	 16
627	 19	65.0	11.9	 16
628	 19	81.3	11.1	 16
629	 19	174.0	33.7	 16
630	 19	104.8	15.7	 16
631	 19	110.0	15.0	 16
632	 19	147.0	17.0	 16
633	 19	455.0	56.9	 16
634	 19	513.0	41.2	 16
635	 19	474.0	45.1	 16
636	 19	140.8	13.8	 16
637	 19	99.8	15.1	 16
638	 19	97.3	14.5	 16
639	 19	127.5	14.7	 16
640	 19	193.8	25.9	 16
641	 19	686.3	63.5	 16
642	 19	360.3	45.4	 16
643	 19	336.0	33.3	 16
644	 19	226.0	27.7	 16
645	 19	156.3	20.9	 16
646	 19	121.5	14.0	 16
647	 19	284.5	34.4	 16
648	 19	422.0	51.2	 16
649	 19	156.8	23.6	 16
650	 19	196.3	24.6	 16
651	 19	258.0	30.8	 16
652	 19	161.8	21.1	 16
653	 19	120.8	21.4	 16
654	 19	385.5	57.8	 16
655	 19	141.3	19.5	 16
656	 19	75.3	8.0	 16
657	 19	125.0	15.3	 16
658	 19	98.3	13.5	 16
659	 19	90.5	16.5	 16
660	 19	211.5	265.7	 16
661	 19	125.5	19.1	 16
662	 19	153.0	22.6	 16
663	 19	73.0	13.7	 16
664	 19	67.0	12.2	 16
665	 19	65.5	11.9	 16
666	 19	278.0	37.2	 16
667	 19	107.5	20.7	 16
668	 19	81.5	12.3	 16
669	 19	180.8	28.9	 16
670	 19	95.0	14.9	 16
671	 19	157.0	13.4	 16
672	 19	77.3	9.6	 16
673	 19	71.3	11.1	 16
674	 19	89.3	12.4	 16
675	 19	87.0	10.5	 16
676	 19	354.8	44.7	 16
677	 19	173.5	20.4	 20
678	 19	70.0	16.6	 16
679	 19	69.3	8.2	 16
680	 19	74.3	13.7	 16
681	 19	74.8	13.6	 16
682	 19	86.0	9.8	 16
683	 19	1001.8	168.2	 16
684	 19	140.8	19.9	 16
685	 19	114.5	15.3	 16
686	 19	111.0	32.2	 16
687	 19	92.0	13.2	 16
688	 19	134.8	18.7	 16
689	 19	139.8	26.1	 16
690	 19	136.8	18.4	 16
691	 19	75.8	13.9	 16
692	 19	225.5	29.8	 16
693	 19	241.3	29.6	 16
694	 19	147.3	16.2	 16
695	 19	158.0	20.7	 16
696	 19	1029.0	158.1	 16
697	 19	81.8	10.9	 16
698	 19	105.0	36.8	 16
699	 19	102.5	11.8	 16
700	 19	91.5	12.1	 16
701	 19	74.3	13.4	 16
702	 19	93.5	13.4	 16
703	 19	87.3	13.3	 16
704	 19	668.0	104.9	 16
705	 19	111.3	19.8	 16
706	 19	78.3	12.1	 16
707	 19	192.5	17.4	 16
708	 19	151.8	26.9	 16
709	 19	221.0	30.7	 16
710	 19	176.3	20.5	 16
711	 19	120.3	24.4	 16
  0	 20	5230.5	796.5	 16
  1	 20	113.5	17.9	 16
  2	 20	104.5	20.4	 16
  3	 20	153.0	20.1	 16
  4	 20	335.3	35.7	 16
  5	 20	99.5	16.3	 16
  6	 20	85.3	11.1	 16
  7	 20	90.0	19.4	 16
  8	 20	100.8	74.4	 16
  9	 20	78.3	13.9	 16
 10	 20	84.0	13.3	 16
 11	 20	75.3	11.2	 16
 12	 20	84.0	11.4	 16
 13	 20	133.8	25.1	 16
 14	 20	197.5	27.3	 16
 15	 20	189.0	20.4	 16
 16	 20	173.3	24.7	 16
 17	 20	198.0	24.1	 16
 18	 20	323.3	31.4	 16
 19	 20	148.3	24.4	 16
 20	 20	149.5	26.9	 16
 21	 20	143.8	31.1	 16
 22	 20	113.0	22.0	 16
 23	 20	99.8	11.7	 16
 24	 20	199.3	47.1	 16
 25	 20	156.3	25.0	 16
 26	 20	85.8	13.0	 16
 27	 20	94.8	13.9	 16
 28	 20	84.3	14.5	 16
 29	 20	64.3	14.3	 16
 30	 20	81.3	19.3	 16
 31	 20	141.0	17.5	 16
 32	 20	88.0	10.9	 16
 33	 20	99.3	13.6	 16
 34	 20	112.5	14.3	 16
 35	 20	340.5	46.4	 16
 36	 20	99.0	15.6	 16
 37	 20	106.8	16.5	 16
 38	 20	229.3	22.1	 16
 39	 20	207.3	32.3	 16
 40	 20	176.3	23.8	 16
 41	 20	84.5	16.4	 16
 42	 20	74.3	8.8	 16
 43	 20	75.5	13.5	 16
 44	 20	158.0	24.1	 16
 45	 20	95.0	15.2	 16
 46	 20	99.5	22.8	 16
 47	 20	107.3	15.2	 16
 48	 20	287.3	40.7	 16
 49	 20	208.0	33.9	 16
 50	 20	92.8	26.8	 16
 51	 20	139.3	23.2	 16
 52	 20	99.0	12.5	 16
 53	 20	407.0	52.4	 16
 54	 20	113.5	19.7	 16
 55	 20	231.3	32.1	 16
 56	 20	184.8	68.1	 16
 57	 20	144.8	13.8	 16
 58	 20	250.5	37.8	 16
 59	 20	293.8	78.0	 16
 60	 20	531.0	67.9	 16
 61	 20	91.5	12.4	 16
 62	 20	264.8	34.0	 16
 63	 20	304.3	28.8	 16
 64	 20	161.3	23.5	 16
 65	 20	128.0	19.8	 16
 66	 20	88.3	12.1	 16
 67	 20	91.8	31.5	 16
 68	 20	103.3	19.1	 16
 69	 20	153.3	17.9	 16
 70	 20	249.0	34.0	 16
 71	 20	200.3	43.5	 16
 72	 20	159.0	28.7	 16
 73	 20	273.3	31.9	 16
 74	 20	169.3	21.2	 16
 75	 20	103.0	16.4	 16
 76	 20	118.5	17.5	 16
 77	 20	244.3	19.6	 16
 78	 20	211.5	23.1	 16
 79	 20	78.8	13.5	 16
 80	 20	99.3	58.7	 16
 81	 20	83.5	12.5	 16
 82	 20	78.3	7.3	 16
 83	 20	266.3	36.2	 16
 84	 20	152.0	16.6	 16
 85	 20	385.3	169.6	 16
 86	 20	88.5	16.9	 16
 87	 20	361.8	118.7	 16
 88	 20	109.3	12.2	 16
 89	 20	115.5	18.9	 16
 90	 20	210.5	34.1	 16
 91	 20	163.0	20.3	 16
 92	 20	77.5	6.0	 16
 93	 20	93.8	14.6	 16
 94	 20	118.5	21.6	 16
 95	 20	110.8	22.5	 16
 96	 20	288.0	45.8	 16
 97	 20	96.0	16.8	 16
 98	 20	198.5	31.2	 16
 99	 20	143.5	19.3	 16
100	 20	123.8	19.2	 16
101	 20	124.8	16.4	 16
102	 20	786.8	64.0	 16
103	 20	517.0	38.5	 16
104	 20	312.3	32.4	 16
105	 20	146.8	18.4	 16
106	 20	102.8	26.7	 16
107	 20	92.5	15.2	 16
108	 20	73.3	9.4	 16
109	 20	107.0	22.1	 16
110	 20	93.3	13.5	 16
111	 20	93.5	12.4	 16
112	 20	97.8	19.1	 16
113	 20	157.0	20.4	 16
114	 20	78.0	10.2	 16
115	 20	86.8	15.6	 16
116	 20	80.0	14.6	 16
117	 20	82.8	15.5	 20
118	 20	66.0	12.3	 16
119	 20	128.0	25.4	 16
120	 20	75.5	12.9	 16
121	 20	80.0	12.8	 16
122	 20	70.3	13.4	 16
123	 20	112.5	21.0	 16
124	 20	90.5	16.5	 16
125	 20	102.5	22.0	 16
126	 20	961.0	102.1	 16
127	 20	697.3	55.2	 16
128	 20	249.5	44.2	 16
129	 20	92.3	11.6	 16
130	 20	107.5	60.0	 16
131	 20	321.0	34.5	 16
132	 20	114.8	12.8	 16
133	 20	87.5	16.3	 16
134	 20	97.0	16.5	 16
135	 20	77.0	13.7	 16
136	 20	80.0	12.2	 16
137	 20	101.3	15.7	 16
138	 20	217.5	35.5	 16
139	 20	118.3	21.2	 16
140	 20	186.0	27.7	 16
141	 20	150.0	17.5	 16
142	 20	89.3	46.2	 16
143	 20	100.0	12.9	 16
144	 20	70.3	14.7	 16
145	 20	105.3	13.2	 16
146	 20	72.0	9.7	 16
147	 20	80.5	17.0	 16
148	 20	95.5	18.2	 16
149	 20	89.3	14.4	 16
150	 20	146.8	18.7	 16
151	 20	169.5	32.6	 16
152	 20	92.0	15.5	 16
153	 20	112.3	17.4	 16
154	 20	188.8	30.0	 16
155	 20	154.0	20.7	 16
156	 20	122.5	26.1	 16
157	 20	171.0	21.2	 16
158	 20	98.0	17.4	 16
159	 20	136.0	20.5	 16
160	 20	185.0	26.7	 16
161	 20	96.5	18.4	 16
162	 20	280.3	30.9	 16
163	 20	949.5	131.2	 16
164	 20	152.5	18.9	 16
165	 20	101.8	25.0	 16
166	 20	192.3	26.0	 16
167	 20	81.5	10.7	 16
168	 20	241.3	17.7	 16
169	 20	76.0	8.5	 16
170	 20	124.8	14.9	 16
171	 20	536.0	44.7	 16
172	 20	140.8	20.8	 16
173	 20	321.5	58.4	 16
174	 20	135.5	21.5	 16
175	 20	105.5	54.1	 16
176	 20	114.3	17.5	 16
177	 20	66.5	9.3	 16
178	 20	186.3	30.9	 16
179	 20	189.3	19.1	 16
180	 20	166.8	27.6	 16
181	 20	97.0	11.9	 16
182	 20	77.8	10.0	 16
183	 20	165.0	27.1	 16
184	 20	119.0	18.9	 16
185	 20	76.5	13.0	 16
186	 20	79.3	8.5	 16
187	 20	175.3	25.8	 16
188	 20	75.3	10.8	 16
189	 20	75.0	13.6	 16
190	 20	77.8	12.1	 16
191	 20	87.3	14.8	 16
192	 20	122.0	13.9	 16
193	 20	137.3	33.4	 16
194	 20	103.5	17.1	 16
195	 20	155.3	25.6	 16
196	 20	79.8	11.8	 16
197	 20	146.3	20.1	 16
198	 20	149.0	21.5	 16
199	 20	158.5	18.8	 16
200	 20	128.0	20.0	 16
201	 20	391.5	36.9	 16
202	 20	263.0	27.0	 16
203	 20	109.3	14.7	 16
204	 20	89.3	12.1	 16
205	 20	119.5	16.0	 16
206	 20	86.3	12.3	 16
207	 20	85.5	20.1	 16
208	 20	188.5	23.3	 16
209	 20	68.3	8.3	 16
210	 20	67.3	9.4	 16
211	 20	109.8	55.4	 16
212	 20	79.5	12.6	 16
213	 20	118.0	115.3	 16
214	 20	87.3	19.0	 16
215	 20	122.0	21.4	 16
216	 20	78.3	9.7	 16
217	 20	99.0	12.9	 16
218	 20	83.5	17.0	 16
219	 20	97.3	13.2	 16
220	 20	79.3	14.3	 16
221	 20	139.0	20.7	 16
222	 20	95.0	13.8	 16
223	 20	67.3	12.0	 16
224	 20	80.0	12.7	 16
225	 20	78.3	13.3	 16
226	 20	73.0	13.3	 16
227	 20	263.8	38.5	 16
228	 20	88.3	11.7	 16
229	 20	234.8	26.7	 16
230	 20	94.3	16.8	 16
231	 20	91.0	14.2	 16
232	 20	69.3	14.2	 16
233	 20	76.5	16.3	 16
234	 20	87.5	14.3	 16
235	 20	221.0	29.8	 16
236	 20	79.3	16.9	 16
237	 20	90.3	14.8	 16
238	 20	557.3	70.0	 16
239	 20	87.5	16.1	 16
240	 20	79.5	12.7	 16
241	 20	79.5	11.7	 16
242	 20	79.8	14.4	 16
243	 20	103.3	12.7	 16
244	 20	148.8	21.1	 16
245	 20	86.3	15.7	 16
246	 20	109.3	23.2	 16
247	 20	72.3	10.4	 16
248	 20	303.8	43.6	 16
249	 20	92.3	12.3	 16
250	 20	80.3	31.6	 16
251	 20	66.5	11.0	 16
252	 20	87.5	15.3	 16
253	 20	83.5	42.4	 16
254	 20	75.8	10.9	 16
255	 20	64.0	9.1	 16
256	 20	86.3	13.2	 16
257	 20	88.3	18.8	 16
258	 20	85.0	12.6	 16
259	 20	134.3	27.3	 20
260	 20	137.8	19.9	 16
261	 20	255.8	25.7	 16
262	 20	213.5	39.1	 16
263	 20	76.0	15.8	 16
264	 20	104.5	16.4	 16
265	 20	122.0	15.9	 16
266	 20	138.5	21.3	 16
267	 20	116.3	20.2	 16
268	 20	132.3	14.5	 16
269	 20	110.0	18.4	 16
270	 20	139.0	14.9	 16
271	 20	381.3	56.8	 16
272	 20	301.8	37.3	 16
273	 20	92.0	18.3	 16
274	 20	94.8	12.1	 16
275	 20	177.3	26.0	 16
276	 20	188.8	27.6	 16
277	 20	72.0	7.6	 16
278	 20	78.8	12.1	 16
279	 20	105.3	19.0	 16
280	 20	125.5	17.7	 16
281	 20	92.8	13.2	 16
282	 20	74.5	12.1	 16
283	 20	87.0	12.0	 16
284	 20	67.5	10.2	 16
285	 20	85.8	14.8	 16
286	 20	73.0	11.6	 16
287	 20	103.8	16.9	 16
288	 20	89.0	15.0	 16
289	 20	91.3	18.6	 16
290	 20	180.3	25.8	 16
291	 20	128.0	18.1	 16
292	 20	99.5	20.4	 16
293	 20	102.0	13.8	 16
294	 20	135.5	16.3	 16
295	 20	89.5	11.8	 16
296	 20	92.0	14.9	 16
297	 20	74.3	9.3	 16
298	 20	108.0	17.3	 16
299	 20	82.8	12.4	 16
300	 20	72.0	10.6	 16
301	 20	76.5	10.7	 16
302	 20	112.8	28.1	 16
303	 20	260.8	26.3	 16
304	 20	166.8	17.9	 16
305	 20	126.8	18.4	 16
306	 20	150.0	21.9	 16
307	 20	74.5	8.5	 16
308	 20	90.8	13.5	 16
309	 20	102.5	17.5	 16
310	 20	83.0	12.8	 16
311	 20	67.5	14.9	 16
312	 20	176.0	29.1	 16
313	 20	76.3	10.7	 16
314	 20	82.5	12.7	 16
315	 20	96.3	19.4	 16
316	 20	70.3	12.2	 16
317	 20	122.5	32.9	 16
318	 20	109.8	15.4	 16
319	 20	91.0	13.1	 16
320	 20	155.0	20.2	 16
321	 20	562.0	43.3	 16
322	 20	192.3	20.7	 16
323	 20	180.5	21.8	 16
324	 20	188.5	18.2	 16
325	 20	72.8	11.3	 16
326	 20	158.0	25.4	 16
327	 20	106.3	16.1	 16
328	 20	71.5	9.5	 16
329	 20	76.0	13.0	 16
330	 20	79.3	11.8	 16
331	 20	102.3	17.5	 16
332	 20	68.3	10.6	 16
333	 20	143.5	25.5	 16
334	 20	176.3	39.2	 16
335	 20	726.3	44.4	 16
336	 20	78.3	15.3	 16
337	 20	73.0	7.8	 16
338	 20	156.5	20.4	 16
339	 20	110.0	17.6	 16
340	 20	114.5	19.7	 16
341	 20	72.3	9.8	 16
342	 20	70.0	9.2	 16
343	 20	84.5	12.0	 16
344	 20	84.3	11.3	 16
345	 20	76.3	11.6	 16
346	 20	87.0	13.6	 16
347	 20	82.5	13.9	 16
348	 20	237.0	25.2	 16
349	 20	94.3	16.8	 16
350	 20	76.3	10.3	 16
351	 20	96.0	16.6	 16
352	 20	98.0	15.7	 16
353	 20	112.5	23.1	 16
354	 20	89.5	12.8	 16
355	 20	138.0	23.8	 16
356	 20	130.3	16.9	 16
357	 20	230.8	26.4	 16
358	 20	794.5	106.0	 16
359	 20	328.0	30.8	 16
360	 20	81.3	13.4	 16
361	 20	112.5	19.9	 16
362	 20	76.8	10.5	 16
363	 20	76.3	14.5	 16
364	 20	113.5	17.2	 16
365	 20	158.8	26.2	 16
366	 20	808.5	83.8	 16
367	 20	126.0	23.4	 16
368	 20	86.0	14.6	 16
369	 20	204.5	25.5	 16
370	 20	96.5	13.5	 16
371	 20	122.0	25.7	 16
372	 20	96.8	20.8	 16
373	 20	101.3	15.5	 16
374	 20	77.0	34.3	 16
375	 20	87.3	15.5	 16
376	 20	86.3	10.9	 16
377	 20	121.3	16.5	 16
378	 20	76.5	12.1	 16
379	 20	80.3	15.3	 16
380	 20	219.3	28.2	 16
381	 20	99.0	12.8	 16
382	 20	76.5	13.6	 16
383	 20	185.3	15.5	 16
384	 20	133.0	18.6	 16
385	 20	128.3	20.3	 16
386	 20	96.0	19.4	 16
387	 20	164.8	12.4	 16
388	 20	96.3	13.6	 16
389	 20	74.5	13.8	 16
390	 20	79.3	13.8	 16
391	 20	82.3	12.7	 16
392	 20	131.3	17.1	 16
393	 20	79.8	12.9	 16
394	 20	86.8	13.7	 16
395	 20	331.5	35.9	 16
396	 20	98.3	28.2	 16
397	 20	81.5	14.5	 16
398	 20	94.3	16.9	 16
399	 20	195.8	20.0	 16
400	 20	197.0	31.5	 16
401	 20	95.5	18.6	 16
402	 20	77.0	9.2	 20
403	 20	85.3	11.8	 16
404	 20	76.0	13.5	 16
405	 20	67.8	8.2	 16
406	 20	73.5	13.3	 16
407	 20	81.5	11.3	 16
408	 20	342.8	44.9	 16
409	 20	1302.5	183.9	 16
410	 20	84.3	15.8	 16
411	 20	116.3	15.3	 16
412	 20	416.8	26.1	 16
413	 20	129.3	16.9	 16
414	 20	195.0	21.7	 16
415	 20	90.5	11.9	 16
416	 20	131.5	20.4	 16
417	 20	100.8	10.2	 16
418	 20	109.0	21.7	 16
419	 20	91.0	15.1	 16
420	 20	241.0	19.1	 16
421	 20	79.8	14.2	 16
422	 20	76.5	16.9	 16
423	 20	190.8	24.0	 16
424	 20	302.8	36.3	 16
425	 20	121.5	15.3	 16
426	 20	110.0	18.1	 16
427	 20	111.0	11.1	 16
428	 20	229.8	26.9	 16
429	 20	168.3	24.3	 16
430	 20	78.5	11.7	 16
431	 20	224.0	23.3	 16
432	 20	120.0	20.4	 16
433	 20	106.0	13.8	 16
434	 20	370.3	52.0	 16
435	 20	68.5	12.7	 16
436	 20	146.3	16.8	 16
437	 20	88.3	15.3	 16
438	 20	72.0	10.6	 16
439	 20	66.3	11.8	 16
440	 20	75.8	15.5	 16
441	 20	127.8	14.1	 16
442	 20	169.0	18.8	 16
443	 20	83.5	13.8	 16
444	 20	263.3	33.1	 16
445	 20	211.5	30.7	 16
446	 20	187.0	23.8	 16
447	 20	79.5	13.6	 16
448	 20	109.3	20.5	 16
449	 20	122.0	15.1	 16
450	 20	146.8	101.9	 16
451	 20	92.0	17.0	 16
452	 20	92.8	17.6	 16
453	 20	70.3	12.1	 16
454	 20	76.8	20.9	 16
455	 20	87.5	12.7	 16
456	 20	105.8	9.5	 16
457	 20	77.3	12.5	 16
458	 20	105.0	16.2	 16
459	 20	82.5	14.1	 16
460	 20	78.3	10.6	 16
461	 20	69.5	11.8	 16
462	 20	82.3	11.4	 16
463	 20	128.0	19.1	 16
464	 20	78.3	12.6	 16
465	 20	73.5	11.4	 16
466	 20	63.0	7.4	 16
467	 20	65.3	8.0	 16
468	 20	129.5	16.2	 16
469	 20	105.0	17.3	 16
470	 20	270.5	26.4	 16
471	 20	423.3	51.7	 16
472	 20	83.3	9.8	 16
473	 20	117.3	17.0	 16
474	 20	75.3	13.1	 16
475	 20	129.0	22.8	 16
476	 20	122.5	17.6	 16
477	 20	74.3	10.7	 16
478	 20	93.8	15.1	 16
479	 20	85.3	23.5	 16
480	 20	208.5	22.1	 16
481	 20	86.5	16.3	 16
482	 20	72.0	9.4	 16
483	 20	74.0	11.4	 16
484	 20	83.5	11.3	 16
485	 20	449.8	39.4	 16
486	 20	451.5	45.9	 16
487	 20	595.8	64.5	 16
488	 20	562.8	68.5	 16
489	 20	191.5	30.0	 16
490	 20	96.0	16.5	 16
491	 20	214.5	26.6	 16
492	 20	86.5	11.8	 16
493	 20	143.0	22.1	 16
494	 20	153.8	15.7	 16
495	 20	79.5	9.6	 16
496	 20	216.3	39.0	 16
497	 20	92.5	17.4	 16
498	 20	189.3	33.5	 16
499	 20	89.8	13.4	 16
500	 20	80.5	12.5	 16
501	 20	98.3	13.7	 16
502	 20	85.5	16.3	 16
503	 20	118.3	17.5	 16
504	 20	152.5	17.9	 16
505	 20	88.8	14.1	 16
506	 20	94.5	16.0	 16
507	 20	220.3	28.3	 16
508	 20	92.5	11.2	 16
509	 20	230.0	31.0	 16
510	 20	85.3	11.0	 16
511	 20	185.8	20.6	 16
512	 20	79.5	14.3	 16
513	 20	73.8	12.9	 16
514	 20	74.0	14.4	 16
515	 20	70.0	10.0	 16
516	 20	87.8	15.5	 16
517	 20	109.0	19.9	 16
518	 20	68.8	11.6	 16
519	 20	74.0	11.5	 16
520	 20	70.3	12.3	 16
521	 20	79.0	12.5	 16
522	 20	67.5	10.0	 16
523	 20	139.0	26.1	 16
524	 20	79.0	10.2	 16
525	 20	70.5	9.7	 16
526	 20	94.0	18.6	 16
527	 20	82.0	7.9	 16
528	 20	189.3	36.3	 16
529	 20	464.3	34.4	 16
530	 20	148.3	22.4	 16
531	 20	181.8	22.5	 16
532	 20	115.5	16.9	 16
533	 20	102.3	13.9	 16
534	 20	73.5	16.4	 16
535	 20	77.3	14.4	 16
536	 20	84.0	13.9	 16
537	 20	129.0	15.6	 16
538	 20	90.8	11.9	 16
539	 20	100.8	13.0	 16
540	 20	103.5	15.6	 16
541	 20	97.5	13.7	 16
542	 20	101.3	12.9	 16
543	 20	109.3	13.9	 16
544	 20	81.3	15.5	 20
545	 20	86.3	10.3	 16
546	 20	80.5	11.0	 16
547	 20	97.3	59.5	 16
548	 20	107.0	25.0	 16
549	 20	109.3	13.2	 16
550	 20	91.5	14.4	 16
551	 20	92.0	21.2	 16
552	 20	77.0	14.1	 16
553	 20	143.5	29.1	 16
554	 20	82.8	14.6	 16
555	 20	72.8	15.2	 16
556	 20	106.5	12.8	 16
557	 20	111.5	19.5	 16
558	 20	75.3	8.8	 16
559	 20	200.5	23.4	 16
560	 20	139.0	19.3	 16
561	 20	65.5	8.1	 16
562	 20	93.0	17.9	 16
563	 20	99.8	21.7	 16
564	 20	107.0	15.7	 16
565	 20	73.5	10.3	 16
566	 20	112.0	15.4	 16
567	 20	92.5	35.3	 16
568	 20	447.0	45.6	 16
569	 20	95.0	14.7	 16
570	 20	70.3	8.7	 16
571	 20	144.5	23.0	 16
572	 20	88.5	10.0	 16
573	 20	87.8	20.5	 16
574	 20	116.0	17.8	 16
575	 20	94.3	16.0	 16
576	 20	203.5	24.4	 16
577	 20	96.5	18.8	 16
578	 20	87.3	13.9	 16
579	 20	150.3	22.0	 16
580	 20	476.3	64.6	 16
581	 20	360.8	43.3	 16
582	 20	103.8	15.5	 16
583	 20	100.3	15.5	 16
584	 20	102.3	14.6	 16
585	 20	87.3	14.3	 16
586	 20	327.8	29.7	 16
587	 20	198.5	24.8	 16
588	 20	90.0	14.0	 16
589	 20	79.0	11.6	 16
590	 20	303.5	21.7	 16
591	 20	105.0	16.1	 16
592	 20	136.0	11.6	 16
593	 20	111.5	20.5	 16
594	 20	71.3	9.6	 16
595	 20	141.5	15.8	 16
596	 20	86.3	11.6	 16
597	 20	193.3	26.8	 16
598	 20	88.3	14.6	 16
599	 20	197.8	22.0	 16
600	 20	208.8	24.8	 16
601	 20	180.0	21.5	 16
602	 20	487.3	52.8	 16
603	 20	183.3	27.7	 16
604	 20	81.5	13.1	 16
605	 20	87.3	11.1	 16
606	 20	133.3	18.9	 16
607	 20	235.5	27.7	 16
608	 20	501.3	35.7	 16
609	 20	127.3	20.8	 16
610	 20	86.5	15.5	 16
611	 20	89.5	14.5	 16
612	 20	74.0	11.3	 16
613	 20	76.0	16.0	 16
614	 20	90.0	12.9	 16
615	 20	222.8	37.0	 16
616	 20	312.8	42.5	 16
617	 20	172.5	27.5	 16
618	 20	121.3	19.7	 16
619	 20	104.5	17.0	 16
620	 20	72.5	10.9	 16
621	 20	77.8	9.3	 16
622	 20	92.5	13.5	 16
623	 20	88.0	12.8	 16
624	 20	81.5	12.9	 16
625	 20	103.5	14.9	 16
626	 20	84.3	13.8	 16
627	 20	78.3	10.9	 16
628	 20	94.8	36.0	 16
629	 20	131.3	11.9	 16
630	 20	87.3	9.6	 16
631	 20	171.0	22.2	 16
632	 20	157.3	23.4	 16
633	 20	136.8	19.7	 16
634	 20	109.8	17.6	 16
635	 20	114.0	19.1	 16
636	 20	228.5	25.8	 16
637	 20	96.5	14.0	 16
638	 20	87.3	12.1	 16
639	 20	175.5	21.1	 16
640	 20	146.3	18.1	 16
641	 20	1243.3	80.8	 16
642	 20	431.8	46.0	 16
643	 20	419.3	42.5	 16
644	 20	426.8	42.2	 16
645	 20	192.5	25.3	 16
646	 20	189.8	28.9	 16
647	 20	165.8	31.3	 16
648	 20	365.0	29.6	 16
649	 20	212.3	27.9	 16
650	 20	193.3	27.7	 16
651	 20	354.8	29.4	 16
652	 20	224.5	22.3	 16
653	 20	90.5	9.1	 16
654	 20	134.0	21.5	 16
655	 20	95.0	14.2	 16
656	 20	85.0	12.2	 16
657	 20	97.8	13.9	 16
658	 20	93.3	12.4	 16
659	 20	88.8	11.4	 16
660	 20	90.0	36.0	 16
661	 20	93.0	17.4	 16
662	 20	80.5	12.7	 16
663	 20	73.5	10.3	 16
664	 20	71.8	12.0	 16
665	 20	75.8	21.4	 16
666	 20	160.3	29.4	 16
667	 20	104.3	12.1	 16
668	 20	77.8	12.1	 16
669	 20	114.3	17.1	 16
670	 20	81.8	19.7	 16
671	 20	296.5	34.4	 16
672	 20	84.3	13.0	 16
673	 20	72.0	10.2	 16
674	 20	67.3	12.6	 16
675	 20	82.0	13.9	 16
676	 20	144.5	22.1	 16
677	 20	101.8	16.0	 16
678	 20	76.0	9.0	 16
679	 20	67.0	9.7	 16
680	 20	65.8	13.4	 16
681	 20	76.0	15.5	 16
682	 20	75.3	11.7	 16
683	 20	140.3	24.2	 16
684	 20	79.8	11.4	 16
685	 20	88.8	14.2	 16
686	 20	101.5	17.7	 20
687	 20	73.8	12.8	 16
688	 20	70.0	13.4	 16
689	 20	147.5	20.6	 16
690	 20	130.8	28.2	 16
691	 20	82.0	10.8	 16
692	 20	299.5	18.6	 16
693	 20	342.0	25.5	 16
694	 20	126.5	22.8	 16
695	 20	113.5	15.2	 16
696	 20	143.3	25.3	 16
697	 20	91.0	18.3	 16
698	 20	66.0	9.4	 16
699	 20	93.0	16.3	 16
700	 20	133.3	13.3	 16
701	 20	85.8	47.9	 16
702	 20	100.3	18.1	 16
703	 20	109.5	15.1	 16
704	 20	393.0	48.8	 16
705	 20	82.3	17.5	 16
706	 20	91.8	14.9	 16
707	 20	161.3	16.7	 16
708	 20	91.3	14.5	 16
709	 20	130.8	20.1	 16
710	 20	122.5	21.2	 16
711	 20	6487.5	711.1	 16
  0	 21	128.3	18.0	 16
  1	 21	220.5	17.8	 16
  2	 21	329.3	39.0	 16
  3	 21	115.8	18.0	 16
  4	 21	119.0	21.7	 16
  5	 21	100.0	15.0	 16
  6	 21	84.0	12.9	 16
  7	 21	202.0	32.4	 16
  8	 21	178.5	31.0	 16
  9	 21	94.0	15.3	 16
 10	 21	196.3	30.8	 16
 11	 21	101.3	14.6	 16
 12	 21	271.3	27.2	 16
 13	 21	90.5	10.5	 16
 14	 21	222.5	19.0	 16
 15	 21	1189.5	99.8	 16
 16	 21	111.3	17.6	 16
 17	 21	84.5	12.1	 16
 18	 21	113.0	13.8	 16
 19	 21	157.3	20.9	 16
 20	 21	156.5	21.8	 16
 21	 21	125.3	17.8	 16
 22	 21	233.3	32.9	 16
 23	 21	78.0	13.4	 16
 24	 21	132.0	23.3	 16
 25	 21	215.0	28.8	 16
 26	 21	73.3	9.2	 16
 27	 21	112.3	22.0	 16
 28	 21	84.0	14.3	 16
 29	 21	92.0	11.5	 16
 30	 21	295.8	48.8	 16
 31	 21	261.8	28.2	 16
 32	 21	80.5	10.5	 16
 33	 21	516.0	87.7	 16
 34	 21	291.0	45.3	 16
 35	 21	87.8	15.3	 16
 36	 21	77.5	11.9	 16
 37	 21	91.0	14.1	 16
 38	 21	209.0	17.3	 16
 39	 21	201.8	26.5	 16
 40	 21	306.8	26.4	 16
 41	 21	233.5	30.7	 16
 42	 21	83.5	14.3	 16
 43	 21	95.5	14.0	 16
 44	 21	90.3	9.4	 16
 45	 21	69.8	13.7	 16
 46	 21	105.3	18.7	 16
 47	 21	122.8	32.8	 16
 48	 21	158.0	17.8	 16
 49	 21	142.0	19.5	 16
 50	 21	83.5	17.6	 16
 51	 21	255.3	31.5	 16
 52	 21	258.0	19.0	 16
 53	 21	86.5	22.5	 16
 54	 21	105.5	16.7	 16
 55	 21	180.8	37.9	 16
 56	 21	359.5	43.2	 16
 57	 21	384.0	38.0	 16
 58	 21	674.5	105.7	 16
 59	 21	281.0	42.5	 16
 60	 21	95.8	16.0	 16
 61	 21	113.5	22.1	 16
 62	 21	115.5	10.6	 16
 63	 21	245.0	32.7	 16
 64	 21	92.0	14.6	 16
 65	 21	98.3	16.2	 16
 66	 21	159.0	44.9	 16
 67	 21	82.0	13.4	 16
 68	 21	141.5	15.3	 16
 69	 21	257.5	23.0	 16
 70	 21	528.8	99.5	 16
 71	 21	71.0	8.6	 16
 72	 21	99.0	14.6	 16
 73	 21	3148.3	279.0	 16
 74	 21	619.3	55.5	 16
 75	 21	221.0	29.7	 16
 76	 21	91.8	19.5	 16
 77	 21	106.0	13.6	 16
 78	 21	123.3	20.3	 16
 79	 21	88.0	21.8	 16
 80	 21	120.0	20.7	 16
 81	 21	106.5	13.5	 16
 82	 21	133.0	14.9	 16
 83	 21	383.0	28.3	 16
 84	 21	857.3	104.4	 16
 85	 21	115.5	19.1	 16
 86	 21	130.8	16.8	 16
 87	 21	179.3	21.1	 16
 88	 21	112.5	18.7	 16
 89	 21	113.8	14.8	 16
 90	 21	89.0	14.4	 16
 91	 21	176.3	24.4	 16
 92	 21	203.0	21.5	 16
 93	 21	289.5	29.7	 16
 94	 21	707.8	92.9	 16
 95	 21	669.0	76.2	 16
 96	 21	148.0	15.1	 16
 97	 21	241.8	34.4	 16
 98	 21	108.3	16.7	 16
 99	 21	70.5	10.7	 16
100	 21	117.3	18.2	 16
101	 21	241.0	31.3	 16
102	 21	112.0	10.8	 16
103	 21	94.5	10.0	 16
104	 21	126.8	19.6	 16
105	 21	122.0	19.9	 16
106	 21	122.5	25.0	 16
107	 21	364.3	42.0	 16
108	 21	81.0	10.9	 16
109	 21	271.3	32.5	 16
110	 21	121.3	20.8	 16
111	 21	94.8	11.3	 16
112	 21	913.3	75.6	 16
113	 21	94.8	17.2	 16
114	 21	89.3	15.2	 16
115	 21	76.5	11.6	 16
116	 21	120.5	15.8	 16
117	 21	92.0	15.0	 16
118	 21	111.8	20.3	 16
119	 21	73.0	14.0	 16
120	 21	130.0	22.5	 16
121	 21	1118.8	97.2	 16
122	 21	1279.5	149.9	 16
123	 21	124.0	16.0	 16
124	 21	165.0	22.1	 16
125	 21	185.5	24.6	 16
126	 21	129.8	27.7	 20
127	 21	83.3	10.9	 16
128	 21	83.3	16.9	 16
129	 21	185.5	25.2	 16
130	 21	109.3	21.0	 16
131	 21	99.3	19.5	 16
132	 21	185.3	28.3	 16
133	 21	261.0	27.1	 16
134	 21	171.3	46.8	 16
135	 21	107.0	23.9	 16
136	 21	240.0	36.0	 16
137	 21	306.5	34.6	 16
138	 21	108.3	12.1	 16
139	 21	397.0	49.7	 16
140	 21	160.3	29.9	 16
141	 21	105.8	18.9	 16
142	 21	143.8	15.5	 16
143	 21	113.5	17.1	 16
144	 21	245.3	39.5	 16
145	 21	105.5	17.3	 16
146	 21	88.0	14.0	 16
147	 21	137.3	19.4	 16
148	 21	104.5	13.2	 16
149	 21	161.0	24.3	 16
150	 21	107.3	14.6	 16
151	 21	178.5	26.2	 16
152	 21	707.5	65.6	 16
153	 21	133.0	18.7	 16
154	 21	118.3	18.3	 16
155	 21	181.3	33.3	 16
156	 21	179.0	26.2	 16
157	 21	464.8	49.6	 16
158	 21	126.0	19.9	 16
159	 21	87.5	15.6	 16
160	 21	563.0	51.6	 16
161	 21	90.8	14.1	 16
162	 21	534.0	45.3	 16
163	 21	90.3	18.1	 16
164	 21	127.5	17.1	 16
165	 21	73.5	11.9	 16
166	 21	62.3	11.5	 16
167	 21	171.5	20.9	 16
168	 21	122.3	13.8	 16
169	 21	178.5	22.7	 16
170	 21	94.8	12.8	 16
171	 21	298.0	48.6	 16
172	 21	170.3	22.8	 16
173	 21	217.3	34.0	 16
174	 21	109.8	20.8	 16
175	 21	117.3	12.3	 16
176	 21	117.8	16.4	 16
177	 21	97.5	23.6	 16
178	 21	119.3	15.7	 16
179	 21	201.8	31.3	 16
180	 21	244.0	36.6	 16
181	 21	71.5	10.5	 16
182	 21	138.3	27.9	 16
183	 21	69.0	10.1	 16
184	 21	79.8	11.4	 16
185	 21	68.5	14.6	 16
186	 21	78.3	13.0	 16
187	 21	91.8	50.7	 16
188	 21	82.5	16.6	 16
189	 21	764.5	91.7	 16
190	 21	116.5	16.9	 16
191	 21	338.3	31.3	 16
192	 21	150.8	23.4	 16
193	 21	113.3	16.6	 16
194	 21	125.8	21.1	 16
195	 21	69.3	7.6	 16
196	 21	190.0	28.7	 16
197	 21	75.8	11.1	 16
198	 21	94.0	14.6	 16
199	 21	273.8	19.1	 16
200	 21	170.5	21.3	 16
201	 21	106.8	17.3	 16
202	 21	85.8	14.0	 16
203	 21	145.8	26.8	 16
204	 21	65.0	8.9	 16
205	 21	97.0	12.4	 16
206	 21	114.8	16.7	 16
207	 21	109.0	16.0	 16
208	 21	188.3	15.7	 16
209	 21	97.0	14.7	 16
210	 21	121.5	21.3	 16
211	 21	74.3	10.3	 16
212	 21	74.0	13.1	 16
213	 21	91.3	17.5	 16
214	 21	101.3	14.8	 16
215	 21	221.8	31.9	 16
216	 21	140.0	21.5	 16
217	 21	119.0	57.0	 16
218	 21	180.5	27.3	 16
219	 21	177.0	27.5	 16
220	 21	228.5	30.1	 16
221	 21	139.8	11.5	 16
222	 21	92.3	28.6	 16
223	 21	76.5	13.5	 16
224	 21	213.0	36.1	 16
225	 21	84.3	52.8	 16
226	 21	87.5	11.2	 16
227	 21	1040.0	126.4	 16
228	 21	100.8	20.8	 16
229	 21	414.3	37.3	 16
230	 21	538.8	54.6	 16
231	 21	448.3	106.0	 16
232	 21	431.5	72.3	 16
233	 21	83.0	8.8	 16
234	 21	133.8	67.7	 16
235	 21	200.3	22.7	 16
236	 21	80.0	13.7	 16
237	 21	107.0	21.4	 16
238	 21	76.0	14.1	 16
239	 21	110.0	15.5	 16
240	 21	92.8	13.1	 16
241	 21	128.5	15.1	 16
242	 21	75.5	9.4	 16
243	 21	429.3	34.5	 16
244	 21	109.3	21.0	 16
245	 21	182.3	22.6	 16
246	 21	270.8	32.3	 16
247	 21	159.0	23.0	 16
248	 21	250.0	45.4	 16
249	 21	176.0	19.0	 16
250	 21	97.0	16.7	 16
251	 21	77.0	13.0	 16
252	 21	70.5	12.6	 16
253	 21	74.0	16.9	 16
254	 21	81.8	15.1	 16
255	 21	101.0	34.9	 16
256	 21	133.3	13.7	 16
257	 21	152.8	18.2	 16
258	 21	168.0	27.2	 16
259	 21	109.3	14.4	 16
260	 21	81.8	10.6	 16
261	 21	87.8	11.4	 16
262	 21	514.0	57.0	 16
263	 21	2778.0	303.7	 16
264	 21	88.8	21.3	 16
265	 21	102.3	12.8	 16
266	 21	205.0	17.8	 16
267	 21	109.3	13.0	 16
268	 21	117.8	16.9	 20
269	 21	241.5	34.3	 16
270	 21	283.8	36.1	 16
271	 21	81.0	14.6	 16
272	 21	87.3	12.8	 16
273	 21	74.0	10.1	 16
274	 21	125.0	17.6	 16
275	 21	298.5	37.3	 16
276	 21	205.8	35.9	 16
277	 21	93.3	17.3	 16
278	 21	122.5	23.8	 16
279	 21	249.8	38.8	 16
280	 21	100.8	16.9	 16
281	 21	145.3	20.2	 16
282	 21	75.3	16.0	 16
283	 21	217.5	44.4	 16
284	 21	64.3	9.2	 16
285	 21	76.8	13.7	 16
286	 21	111.5	19.7	 16
287	 21	149.3	14.8	 16
288	 21	473.8	50.9	 16
289	 21	112.8	21.1	 16
290	 21	121.0	14.7	 16
291	 21	116.3	16.0	 16
292	 21	82.8	10.7	 16
293	 21	273.8	34.8	 16
294	 21	233.8	27.4	 16
295	 21	85.0	16.0	 16
296	 21	99.5	16.0	 16
297	 21	86.5	9.9	 16
298	 21	80.8	15.7	 16
299	 21	120.8	17.0	 16
300	 21	112.5	12.1	 16
301	 21	152.5	23.4	 16
302	 21	316.0	27.1	 16
303	 21	482.8	54.1	 16
304	 21	497.8	66.2	 16
305	 21	1763.8	287.7	 16
306	 21	149.8	29.7	 16
307	 21	81.5	13.8	 16
308	 21	75.5	9.6	 16
309	 21	158.8	23.0	 16
310	 21	163.5	26.0	 16
311	 21	225.8	39.3	 16
312	 21	83.5	16.2	 16
313	 21	280.0	36.4	 16
314	 21	99.3	14.4	 16
315	 21	75.5	16.1	 16
316	 21	99.3	9.8	 16
317	 21	251.3	31.9	 16
318	 21	806.8	94.1	 16
319	 21	94.0	15.6	 16
320	 21	187.0	34.1	 16
321	 21	711.5	62.9	 16
322	 21	2823.0	464.1	 16
323	 21	497.3	91.5	 16
324	 21	80.3	13.2	 16
325	 21	100.8	14.0	 16
326	 21	219.3	24.6	 16
327	 21	122.5	17.9	 16
328	 21	77.3	54.0	 16
329	 21	190.0	31.2	 16
330	 21	74.3	76.6	 16
331	 21	144.5	18.6	 16
332	 21	245.5	49.2	 16
333	 21	175.0	24.8	 16
334	 21	204.0	17.3	 16
335	 21	258.0	40.1	 16
336	 21	81.8	11.2	 16
337	 21	163.3	26.8	 16
338	 21	141.3	18.9	 16
339	 21	97.5	10.4	 16
340	 21	175.5	15.9	 16
341	 21	819.8	129.0	 16
342	 21	91.3	15.6	 16
343	 21	88.5	14.5	 16
344	 21	136.5	9.9	 16
345	 21	99.0	17.9	 16
346	 21	106.5	16.7	 16
347	 21	108.5	18.8	 16
348	 21	1142.3	136.9	 16
349	 21	1148.0	163.6	 16
350	 21	131.3	20.4	 16
351	 21	136.8	13.5	 16
352	 21	121.5	22.8	 16
353	 21	157.8	19.2	 16
354	 21	105.3	26.8	 16
355	 21	2808.8	296.4	 16
356	 21	197.0	24.5	 16
357	 21	617.0	57.4	 16
358	 21	282.3	27.9	 16
359	 21	485.5	50.9	 16
360	 21	411.3	31.9	 16
361	 21	743.3	99.6	 16
362	 21	94.3	15.3	 16
363	 21	124.3	16.3	 16
364	 21	72.0	15.9	 16
365	 21	158.3	23.4	 16
366	 21	136.8	13.3	 16
367	 21	397.3	39.2	 16
368	 21	138.8	16.7	 16
369	 21	317.5	21.8	 16
370	 21	207.5	27.1	 16
371	 21	276.0	35.2	 16
372	 21	146.5	20.5	 16
373	 21	73.0	8.1	 16
374	 21	115.8	15.3	 16
375	 21	206.0	57.9	 16
376	 21	102.8	11.4	 16
377	 21	116.0	15.2	 16
378	 21	124.5	18.3	 16
379	 21	91.0	13.9	 16
380	 21	91.0	16.7	 16
381	 21	79.5	15.6	 16
382	 21	120.3	18.7	 16
383	 21	137.3	26.8	 16
384	 21	79.5	15.2	 16
385	 21	90.0	12.5	 16
386	 21	69.8	10.7	 16
387	 21	113.3	17.6	 16
388	 21	95.8	15.8	 16
389	 21	149.0	24.6	 16
390	 21	95.3	16.4	 16
391	 21	76.3	14.5	 16
392	 21	601.3	108.7	 16
393	 21	643.0	44.9	 16
394	 21	77.0	9.4	 16
395	 21	99.8	12.9	 16
396	 21	271.3	41.5	 16
397	 21	4462.5	897.2	 16
398	 21	197.3	38.9	 16
399	 21	158.5	17.0	 16
400	 21	159.8	30.0	 16
401	 21	102.8	16.4	 16
402	 21	76.0	10.5	 16
403	 21	126.5	18.1	 16
404	 21	114.0	21.3	 16
405	 21	89.0	13.6	 16
406	 21	262.5	51.6	 16
407	 21	181.8	22.9	 16
408	 21	118.3	16.5	 16
409	 21	74.0	10.4	 16
410	 21	77.3	11.1	 16
411	 21	82.0	12.6	 20
412	 21	899.3	128.0	 16
413	 21	108.5	16.6	 16
414	 21	324.3	60.5	 16
415	 21	160.5	19.4	 16
416	 21	147.8	23.2	 16
417	 21	104.8	16.3	 16
418	 21	111.3	15.3	 16
419	 21	124.0	24.4	 16
420	 21	81.0	15.4	 16
421	 21	123.8	19.6	 16
422	 21	118.3	13.4	 16
423	 21	111.5	17.3	 16
424	 21	482.5	59.5	 16
425	 21	180.3	26.6	 16
426	 21	198.5	24.7	 16
427	 21	166.5	20.5	 16
428	 21	142.0	14.1	 16
429	 21	158.5	26.9	 16
430	 21	186.3	23.8	 16
431	 21	117.8	17.8	 16
432	 21	166.5	18.5	 16
433	 21	215.5	21.8	 16
434	 21	182.3	16.6	 16
435	 21	199.3	24.8	 16
436	 21	96.0	16.2	 16
437	 21	97.3	13.7	 16
438	 21	240.5	48.1	 16
439	 21	105.3	13.1	 16
440	 21	102.3	17.6	 16
441	 21	165.5	26.1	 16
442	 21	123.0	21.0	 16
443	 21	95.8	11.2	 16
444	 21	115.0	18.6	 16
445	 21	75.3	12.7	 16
446	 21	167.8	21.8	 16
447	 21	128.0	18.7	 16
448	 21	173.3	23.2	 16
449	 21	3697.5	416.7	 16
450	 21	226.5	26.7	 16
451	 21	170.8	29.9	 16
452	 21	129.3	22.1	 16
453	 21	79.5	7.3	 16
454	 21	118.3	17.2	 16
455	 21	122.0	27.1	 16
456	 21	159.0	18.0	 16
457	 21	123.0	23.6	 16
458	 21	197.3	20.4	 16
459	 21	157.5	13.8	 16
460	 21	277.5	37.3	 16
461	 21	198.0	32.7	 16
462	 21	601.8	64.1	 16
463	 21	241.5	36.1	 16
464	 21	152.8	102.9	 16
465	 21	127.5	20.4	 16
466	 21	137.3	23.2	 16
467	 21	192.5	30.6	 16
468	 21	246.5	53.0	 16
469	 21	132.8	19.2	 16
470	 21	125.8	16.0	 16
471	 21	82.0	12.1	 16
472	 21	92.8	9.7	 16
473	 21	147.8	17.8	 16
474	 21	80.0	15.0	 16
475	 21	76.5	14.2	 16
476	 21	466.8	60.1	 16
477	 21	633.0	37.3	 16
478	 21	233.0	65.4	 16
479	 21	107.8	15.2	 16
480	 21	85.3	17.4	 16
481	 21	75.3	8.8	 16
482	 21	98.5	14.8	 16
483	 21	82.3	8.6	 16
484	 21	82.5	18.8	 16
485	 21	101.0	17.4	 16
486	 21	132.8	23.0	 16
487	 21	246.0	36.3	 16
488	 21	121.8	25.0	 16
489	 21	92.8	13.1	 16
490	 21	225.0	25.3	 16
491	 21	235.5	29.7	 16
492	 21	166.5	18.3	 16
493	 21	125.3	15.8	 16
494	 21	170.3	19.5	 16
495	 21	83.8	14.0	 16
496	 21	111.8	17.6	 16
497	 21	68.8	12.0	 16
498	 21	92.0	10.2	 16
499	 21	167.0	57.2	 16
500	 21	160.3	24.4	 16
501	 21	380.3	63.9	 16
502	 21	194.5	30.7	 16
503	 21	124.0	19.8	 16
504	 21	153.3	14.2	 16
505	 21	421.8	53.8	 16
506	 21	88.3	10.6	 16
507	 21	424.8	36.5	 16
508	 21	105.0	15.7	 16
509	 21	87.5	11.5	 16
510	 21	85.0	11.7	 16
511	 21	2718.0	232.7	 16
512	 21	101.0	10.1	 16
513	 21	68.8	13.0	 16
514	 21	85.3	14.6	 16
515	 21	213.0	30.8	 16
516	 21	223.5	25.1	 16
517	 21	80.3	11.9	 16
518	 21	150.8	16.7	 16
519	 21	77.0	11.0	 16
520	 21	187.3	29.6	 16
521	 21	230.5	20.4	 16
522	 21	264.3	23.5	 16
523	 21	127.0	9.1	 16
524	 21	72.0	11.5	 16
525	 21	89.3	16.4	 16
526	 21	76.3	9.4	 16
527	 21	240.3	30.4	 16
528	 21	162.8	23.5	 16
529	 21	261.5	31.3	 16
530	 21	176.8	26.1	 16
531	 21	105.3	15.5	 16
532	 21	413.0	41.9	 16
533	 21	79.0	12.7	 16
534	 21	72.3	13.7	 16
535	 21	241.0	29.1	 16
536	 21	80.3	9.0	 16
537	 21	150.5	17.6	 16
538	 21	74.3	11.6	 16
539	 21	82.5	12.5	 16
540	 21	75.5	9.2	 16
541	 21	96.0	36.2	 16
542	 21	84.0	11.8	 16
543	 21	222.3	36.5	 16
544	 21	151.0	15.1	 16
545	 21	1005.8	110.2	 16
546	 21	1120.0	73.8	 16
547	 21	111.8	17.3	 16
548	 21	141.3	20.0	 16
549	 21	108.0	11.6	 16
550	 21	140.0	14.3	 16
551	 21	103.3	13.8	 16
552	 21	163.3	38.7	 16
553	 21	85.0	29.3	 20
554	 21	72.3	13.4	 16
555	 21	72.5	13.7	 16
556	 21	76.0	13.4	 16
557	 21	83.3	12.8	 16
558	 21	59.0	7.4	 16
559	 21	78.0	8.0	 16
560	 21	176.8	152.7	 16
561	 21	110.0	23.3	 16
562	 21	150.5	25.5	 16
563	 21	212.5	30.2	 16
564	 21	177.8	23.2	 16
565	 21	87.5	25.7	 16
566	 21	160.5	17.9	 16
567	 21	70.8	10.2	 16
568	 21	259.5	19.6	 16
569	 21	122.5	17.4	 16
570	 21	80.3	11.2	 16
571	 21	93.5	10.8	 16
572	 21	89.3	10.4	 16
573	 21	93.3	13.5	 16
574	 21	173.3	27.1	 16
575	 21	132.3	21.5	 16
576	 21	210.0	36.2	 16
577	 21	144.5	20.9	 16
578	 21	151.3	17.1	 16
579	 21	160.5	16.7	 16
580	 21	163.8	23.7	 16
581	 21	81.8	9.7	 16
582	 21	83.0	12.2	 16
583	 21	2878.8	362.0	 16
584	 21	96.3	14.6	 16
585	 21	297.8	44.3	 16
586	 21	137.8	18.6	 16
587	 21	77.0	11.4	 16
588	 21	87.8	14.4	 16
589	 21	90.5	20.1	 16
590	 21	140.5	17.6	 16
591	 21	438.8	67.4	 16
592	 21	302.3	24.3	 16
593	 21	193.8	16.5	 16
594	 21	110.3	15.4	 16
595	 21	94.0	12.8	 16
596	 21	179.3	30.6	 16
597	 21	80.3	12.2	 16
598	 21	104.8	17.5	 16
599	 21	180.3	17.2	 16
600	 21	99.3	19.5	 16
601	 21	82.3	15.0	 16
602	 21	289.5	42.3	 16
603	 21	129.5	17.9	 16
604	 21	111.3	20.8	 16
605	 21	143.8	15.0	 16
606	 21	128.5	14.2	 16
607	 21	147.5	18.6	 16
608	 21	141.0	20.6	 16
609	 21	454.3	74.2	 16
610	 21	136.0	17.8	 16
611	 21	84.8	10.6	 16
612	 21	180.0	22.0	 16
613	 21	259.3	39.4	 16
614	 21	169.3	24.2	 16
615	 21	157.5	24.2	 16
616	 21	282.0	43.0	 16
617	 21	135.3	17.9	 16
618	 21	80.8	13.8	 16
619	 21	323.0	32.3	 16
620	 21	133.3	25.5	 16
621	 21	125.5	25.1	 16
622	 21	82.5	13.7	 16
623	 21	106.0	16.9	 16
624	 21	103.8	12.7	 16
625	 21	104.8	13.2	 16
626	 21	254.3	34.6	 16
627	 21	95.3	16.4	 16
628	 21	126.8	24.7	 16
629	 21	111.5	10.9	 16
630	 21	143.5	19.6	 16
631	 21	138.5	19.6	 16
632	 21	412.5	49.7	 16
633	 21	160.3	20.8	 16
634	 21	90.5	17.5	 16
635	 21	592.0	95.1	 16
636	 21	115.5	15.6	 16
637	 21	109.5	16.2	 16
638	 21	423.3	83.0	 16
639	 21	89.3	14.8	 16
640	 21	77.3	9.7	 16
641	 21	313.8	43.1	 16
642	 21	102.3	16.5	 16
643	 21	89.0	12.0	 16
644	 21	87.0	16.7	 16
645	 21	67.5	10.4	 16
646	 21	98.5	13.6	 16
647	 21	87.3	14.3	 16
648	 21	170.3	23.4	 16
649	 21	162.8	23.6	 16
650	 21	140.5	23.2	 16
651	 21	139.3	15.8	 16
652	 21	183.0	21.2	 16
653	 21	198.8	24.1	 16
654	 21	102.0	15.6	 16
655	 21	197.3	25.8	 16
656	 21	1402.0	172.0	 16
657	 21	4867.0	562.6	 16
658	 21	127.3	17.3	 16
659	 21	93.8	15.9	 16
660	 21	196.3	30.8	 16
661	 21	80.5	10.8	 16
662	 21	1264.5	204.6	 16
663	 21	97.0	14.4	 16
664	 21	398.3	74.4	 16
665	 21	78.0	12.5	 16
666	 21	87.0	13.0	 16
667	 21	69.3	8.7	 16
668	 21	82.3	29.0	 16
669	 21	74.3	13.9	 16
670	 21	76.3	9.8	 16
671	 21	235.0	29.0	 16
672	 21	132.3	16.8	 16
673	 21	157.0	23.6	 16
674	 21	292.8	37.3	 16
675	 21	348.8	54.2	 16
676	 21	317.0	31.0	 16
677	 21	97.0	13.6	 16
678	 21	79.5	19.1	 16
679	 21	161.3	40.2	 16
680	 21	73.0	15.5	 16
681	 21	101.8	16.9	 16
682	 21	171.0	22.8	 16
683	 21	70.3	11.5	 16
684	 21	67.0	6.3	 16
685	 21	65.0	9.1	 16
686	 21	89.5	13.3	 16
687	 21	159.8	21.0	 16
688	 21	97.5	12.0	 16
689	 21	562.8	93.8	 16
690	 21	452.5	49.9	 16
691	 21	181.3	14.9	 16
692	 21	103.3	17.7	 16
693	 21	253.0	36.4	 16
694	 21	216.5	25.6	 16
695	 21	99.0	18.2	 16
696	 21	112.5	13.0	 20
697	 21	137.5	19.6	 16
698	 21	270.0	53.0	 16
699	 21	65.5	10.9	 16
700	 21	451.3	64.8	 16
701	 21	123.3	13.2	 16
702	 21	89.0	19.7	 16
703	 21	102.5	13.7	 16
704	 21	115.3	19.6	 16
705	 21	136.3	20.4	 16
706	 21	352.3	30.6	 16
707	 21	205.3	25.3	 16
708	 21	114.8	19.7	 16
709	 21	178.8	22.9	 16
710	 21	361.8	28.6	 16
711	 21	110.5	17.2	 16
  0	 22	5695.5	900.5	 16
  1	 22	315.3	53.7	 16
  2	 22	78.0	11.4	 16
  3	 22	77.5	9.6	 16
  4	 22	132.8	17.0	 16
  5	 22	84.5	12.4	 16
  6	 22	71.8	10.6	 16
  7	 22	156.8	30.6	 16
  8	 22	146.5	18.8	 16
  9	 22	135.5	20.4	 16
 10	 22	189.5	24.1	 16
 11	 22	139.0	22.2	 16
 12	 22	106.0	17.3	 16
 13	 22	85.5	19.9	 16
 14	 22	144.3	18.7	 16
 15	 22	145.8	56.6	 16
 16	 22	85.0	16.3	 16
 17	 22	149.3	25.9	 16
 18	 22	122.5	14.3	 16
 19	 22	125.5	21.2	 16
 20	 22	81.8	14.1	 16
 21	 22	116.0	15.1	 16
 22	 22	154.0	25.5	 16
 23	 22	73.0	11.0	 16
 24	 22	81.5	13.9	 16
 25	 22	95.3	14.0	 16
 26	 22	86.3	14.9	 16
 27	 22	81.5	15.0	 16
 28	 22	65.0	12.6	 16
 29	 22	70.3	12.3	 16
 30	 22	176.5	20.5	 16
 31	 22	223.5	34.7	 16
 32	 22	78.5	12.1	 16
 33	 22	127.5	14.7	 16
 34	 22	110.8	19.9	 16
 35	 22	79.0	13.1	 16
 36	 22	81.8	44.5	 16
 37	 22	88.3	16.9	 16
 38	 22	132.8	15.9	 16
 39	 22	290.0	31.4	 16
 40	 22	149.3	15.5	 16
 41	 22	180.8	27.7	 16
 42	 22	75.5	8.3	 16
 43	 22	81.0	14.4	 16
 44	 22	91.5	17.0	 16
 45	 22	85.3	13.2	 16
 46	 22	109.5	19.2	 16
 47	 22	88.0	14.7	 16
 48	 22	87.3	17.3	 16
 49	 22	93.8	26.8	 16
 50	 22	79.8	12.5	 16
 51	 22	108.3	16.4	 16
 52	 22	116.3	16.3	 16
 53	 22	72.3	14.5	 16
 54	 22	98.5	15.2	 16
 55	 22	89.5	10.6	 16
 56	 22	147.8	24.5	 16
 57	 22	291.0	41.2	 16
 58	 22	133.8	26.4	 16
 59	 22	139.0	22.8	 16
 60	 22	89.3	15.7	 16
 61	 22	84.8	12.8	 16
 62	 22	98.5	15.2	 16
 63	 22	142.0	17.8	 16
 64	 22	99.5	12.8	 16
 65	 22	114.5	20.6	 16
 66	 22	119.8	18.9	 16
 67	 22	82.8	14.1	 16
 68	 22	237.5	20.0	 16
 69	 22	366.8	32.6	 16
 70	 22	389.3	94.0	 16
 71	 22	78.8	16.7	 16
 72	 22	88.3	13.6	 16
 73	 22	559.5	97.2	 16
 74	 22	126.3	20.8	 16
 75	 22	92.8	13.1	 16
 76	 22	85.3	10.4	 16
 77	 22	93.5	13.1	 16
 78	 22	193.3	24.5	 16
 79	 22	84.0	16.1	 16
 80	 22	123.5	18.1	 16
 81	 22	220.8	22.8	 16
 82	 22	191.3	25.7	 16
 83	 22	155.8	26.3	 16
 84	 22	246.0	42.4	 16
 85	 22	105.3	15.3	 16
 86	 22	92.3	13.5	 16
 87	 22	182.8	23.4	 16
 88	 22	86.0	10.8	 16
 89	 22	169.8	44.3	 16
 90	 22	90.8	16.6	 16
 91	 22	298.0	30.4	 16
 92	 22	408.8	155.5	 16
 93	 22	113.0	43.1	 16
 94	 22	343.5	46.8	 16
 95	 22	286.5	54.2	 16
 96	 22	127.3	20.6	 16
 97	 22	202.0	27.2	 16
 98	 22	111.0	18.3	 16
 99	 22	68.5	12.2	 16
100	 22	79.8	17.0	 16
101	 22	81.5	12.8	 16
102	 22	100.3	13.7	 16
103	 22	80.3	12.5	 16
104	 22	132.5	25.3	 16
105	 22	260.8	36.3	 16
106	 22	260.8	29.9	 16
107	 22	100.8	78.6	 16
108	 22	86.3	14.9	 16
109	 22	264.3	36.7	 16
110	 22	101.5	16.3	 16
111	 22	95.3	14.8	 16
112	 22	143.5	22.9	 16
113	 22	84.5	15.8	 16
114	 22	74.5	9.4	 16
115	 22	83.0	14.2	 16
116	 22	89.3	28.7	 16
117	 22	75.5	15.5	 16
118	 22	83.3	8.9	 16
119	 22	76.8	10.9	 16
120	 22	167.0	19.5	 16
121	 22	230.3	33.7	 16
122	 22	112.5	20.0	 16
123	 22	121.3	19.6	 16
124	 22	84.3	13.1	 16
125	 22	95.0	12.1	 16
126	 22	133.3	20.5	 16
127	 22	83.3	15.0	 16
128	 22	74.8	12.5	 16
129	 22	350.3	39.3	 16
130	 22	107.5	18.4	 16
131	 22	87.3	13.9	 16
132	 22	88.8	17.8	 16
133	 22	173.0	25.3	 16
134	 22	89.3	11.2	 16
135	 22	105.0	20.6	 20
136	 22	139.8	24.5	 16
137	 22	173.0	36.8	 16
138	 22	99.5	12.1	 16
139	 22	127.3	21.9	 16
140	 22	111.5	17.1	 16
141	 22	75.3	7.9	 16
142	 22	80.3	12.7	 16
143	 22	89.0	14.5	 16
144	 22	207.3	23.4	 16
145	 22	106.3	15.6	 16
146	 22	77.3	12.3	 16
147	 22	87.5	13.8	 16
148	 22	86.8	14.4	 16
149	 22	70.3	12.2	 16
150	 22	90.0	14.6	 16
151	 22	105.3	19.5	 16
152	 22	577.8	62.9	 16
153	 22	110.8	14.4	 16
154	 22	91.3	22.7	 16
155	 22	91.0	11.1	 16
156	 22	139.8	15.3	 16
157	 22	146.0	25.3	 16
158	 22	94.5	14.5	 16
159	 22	86.5	10.5	 16
160	 22	233.5	29.2	 16
161	 22	83.5	9.9	 16
162	 22	259.0	44.7	 16
163	 22	83.5	14.6	 16
164	 22	71.8	12.1	 16
165	 22	74.5	12.5	 16
166	 22	72.3	10.3	 16
167	 22	157.8	22.3	 16
168	 22	119.3	15.3	 16
169	 22	87.0	13.3	 16
170	 22	101.3	19.6	 16
171	 22	182.3	26.5	 16
172	 22	105.0	14.0	 16
173	 22	205.5	17.4	 16
174	 22	126.3	26.6	 16
175	 22	86.3	14.8	 16
176	 22	175.8	25.1	 16
177	 22	104.3	23.9	 16
178	 22	121.8	16.9	 16
179	 22	107.3	15.6	 16
180	 22	146.3	23.5	 16
181	 22	97.5	19.1	 16
182	 22	99.5	15.9	 16
183	 22	63.8	13.1	 16
184	 22	74.5	10.5	 16
185	 22	92.8	15.6	 16
186	 22	93.0	26.4	 16
187	 22	67.5	8.5	 16
188	 22	85.3	15.2	 16
189	 22	219.0	30.3	 16
190	 22	72.3	10.3	 16
191	 22	122.3	16.0	 16
192	 22	110.5	20.7	 16
193	 22	103.3	14.1	 16
194	 22	122.0	24.9	 16
195	 22	70.5	12.0	 16
196	 22	110.5	8.8	 16
197	 22	74.3	13.0	 16
198	 22	78.8	13.3	 16
199	 22	322.8	40.8	 16
200	 22	79.3	10.7	 16
201	 22	89.0	13.0	 16
202	 22	65.0	12.6	 16
203	 22	70.3	8.9	 16
204	 22	64.3	9.0	 16
205	 22	84.0	12.7	 16
206	 22	101.3	10.6	 16
207	 22	79.5	16.1	 16
208	 22	143.3	15.7	 16
209	 22	119.0	16.6	 16
210	 22	230.8	22.1	 16
211	 22	70.5	9.9	 16
212	 22	70.5	13.2	 16
213	 22	81.0	11.5	 16
214	 22	76.5	12.2	 16
215	 22	84.3	13.2	 16
216	 22	248.0	31.1	 16
217	 22	87.3	13.2	 16
218	 22	78.0	9.7	 16
219	 22	127.3	19.8	 16
220	 22	144.3	22.9	 16
221	 22	108.0	23.9	 16
222	 22	82.5	20.3	 16
223	 22	67.8	12.6	 16
224	 22	103.3	19.7	 16
225	 22	72.5	14.1	 16
226	 22	70.8	13.3	 16
227	 22	272.5	56.6	 16
228	 22	121.3	13.4	 16
229	 22	313.0	26.2	 16
230	 22	175.8	30.9	 16
231	 22	84.5	12.2	 16
232	 22	82.5	17.5	 16
233	 22	97.0	12.0	 16
234	 22	207.3	27.8	 16
235	 22	148.0	19.5	 16
236	 22	66.0	10.9	 16
237	 22	85.5	16.2	 16
238	 22	76.3	14.4	 16
239	 22	97.0	15.5	 16
240	 22	99.3	16.5	 16
241	 22	102.5	12.3	 16
242	 22	80.0	11.3	 16
243	 22	200.3	22.5	 16
244	 22	138.3	19.1	 16
245	 22	137.3	15.6	 16
246	 22	219.3	33.0	 16
247	 22	88.0	14.9	 16
248	 22	306.0	49.7	 16
249	 22	122.0	16.7	 16
250	 22	89.0	11.3	 16
251	 22	73.3	11.5	 16
252	 22	72.5	8.2	 16
253	 22	77.8	12.7	 16
254	 22	76.5	11.6	 16
255	 22	94.3	39.9	 16
256	 22	128.0	21.4	 16
257	 22	103.3	11.0	 16
258	 22	122.5	10.6	 16
259	 22	90.0	14.5	 16
260	 22	80.0	12.0	 16
261	 22	111.0	16.4	 16
262	 22	261.3	25.1	 16
263	 22	492.8	103.4	 16
264	 22	79.0	11.7	 16
265	 22	85.5	14.5	 16
266	 22	165.5	18.3	 16
267	 22	183.3	26.7	 16
268	 22	195.0	28.4	 16
269	 22	157.0	23.8	 16
270	 22	108.5	21.5	 16
271	 22	82.3	12.4	 16
272	 22	84.0	17.5	 16
273	 22	84.5	12.3	 16
274	 22	116.3	16.0	 16
275	 22	101.3	15.8	 16
276	 22	106.5	16.9	 16
277	 22	77.5	10.9	 16
278	 22	78.3	11.1	 20
279	 22	92.0	14.3	 16
280	 22	93.0	15.4	 16
281	 22	75.3	10.6	 16
282	 22	73.0	11.2	 16
283	 22	77.0	9.3	 16
284	 22	71.8	14.6	 16
285	 22	83.0	14.5	 16
286	 22	81.5	12.9	 16
287	 22	98.8	16.8	 16
288	 22	170.0	24.3	 16
289	 22	93.0	10.5	 16
290	 22	118.0	13.2	 16
291	 22	116.3	31.2	 16
292	 22	112.5	13.2	 16
293	 22	157.5	16.0	 16
294	 22	155.0	76.3	 16
295	 22	79.8	11.6	 16
296	 22	113.3	18.7	 16
297	 22	73.0	11.1	 16
298	 22	89.0	15.1	 16
299	 22	98.5	14.9	 16
300	 22	78.0	13.4	 16
301	 22	143.8	19.5	 16
302	 22	715.5	51.3	 16
303	 22	272.0	36.3	 16
304	 22	347.3	45.5	 16
305	 22	422.5	79.1	 16
306	 22	112.8	9.9	 16
307	 22	85.3	15.5	 16
308	 22	79.0	9.7	 16
309	 22	128.3	21.2	 16
310	 22	138.0	23.0	 16
311	 22	95.0	13.4	 16
312	 22	91.5	13.1	 16
313	 22	153.3	19.9	 16
314	 22	81.0	13.9	 16
315	 22	76.8	19.3	 16
316	 22	93.3	19.4	 16
317	 22	631.5	93.1	 16
318	 22	246.5	29.8	 16
319	 22	103.0	18.6	 16
320	 22	155.8	19.8	 16
321	 22	140.0	22.1	 16
322	 22	349.5	62.1	 16
323	 22	133.0	30.4	 16
324	 22	80.0	10.5	 16
325	 22	88.3	12.9	 16
326	 22	85.0	11.3	 16
327	 22	77.8	11.2	 16
328	 22	93.8	18.2	 16
329	 22	89.3	16.7	 16
330	 22	83.5	21.4	 16
331	 22	95.0	13.5	 16
332	 22	130.3	22.2	 16
333	 22	90.5	18.0	 16
334	 22	114.8	20.8	 16
335	 22	686.3	90.2	 16
336	 22	84.5	15.8	 16
337	 22	149.5	18.7	 16
338	 22	370.8	35.2	 16
339	 22	84.3	13.0	 16
340	 22	206.3	21.7	 16
341	 22	181.0	15.9	 16
342	 22	180.5	23.9	 16
343	 22	107.0	14.3	 16
344	 22	106.0	19.7	 16
345	 22	81.3	11.5	 16
346	 22	87.3	11.6	 16
347	 22	100.8	11.1	 16
348	 22	336.0	50.2	 16
349	 22	290.8	55.4	 16
350	 22	93.3	11.6	 16
351	 22	88.3	12.9	 16
352	 22	88.8	10.0	 16
353	 22	110.3	13.4	 16
354	 22	117.3	13.3	 16
355	 22	599.0	97.2	 16
356	 22	150.3	19.5	 16
357	 22	893.0	69.2	 16
358	 22	296.3	31.1	 16
359	 22	276.0	25.5	 16
360	 22	289.3	38.9	 16
361	 22	178.0	20.0	 16
362	 22	99.5	10.0	 16
363	 22	85.5	12.6	 16
364	 22	91.3	14.4	 16
365	 22	127.3	18.0	 16
366	 22	106.5	14.5	 16
367	 22	127.5	17.9	 16
368	 22	220.5	29.6	 16
369	 22	114.0	18.5	 16
370	 22	130.5	14.9	 16
371	 22	171.5	25.3	 16
372	 22	109.3	17.5	 16
373	 22	76.0	11.2	 16
374	 22	101.3	13.1	 16
375	 22	103.0	10.0	 16
376	 22	104.0	13.5	 16
377	 22	174.0	20.5	 16
378	 22	146.3	20.6	 16
379	 22	104.0	24.4	 16
380	 22	99.8	14.1	 16
381	 22	77.3	12.4	 16
382	 22	68.8	11.6	 16
383	 22	88.0	11.3	 16
384	 22	76.8	13.3	 16
385	 22	83.3	17.5	 16
386	 22	83.0	17.0	 16
387	 22	82.8	15.3	 16
388	 22	111.0	24.8	 16
389	 22	115.5	19.4	 16
390	 22	90.0	15.7	 16
391	 22	67.3	9.9	 16
392	 22	126.0	17.3	 16
393	 22	120.5	24.0	 16
394	 22	75.3	10.5	 16
395	 22	111.3	18.2	 16
396	 22	104.3	15.9	 16
397	 22	146.8	27.7	 16
398	 22	111.5	22.5	 16
399	 22	95.8	13.8	 16
400	 22	92.8	16.4	 16
401	 22	86.3	14.6	 16
402	 22	78.8	9.3	 16
403	 22	96.3	14.5	 16
404	 22	147.5	20.7	 16
405	 22	74.5	11.5	 16
406	 22	141.8	20.8	 16
407	 22	143.3	21.8	 16
408	 22	105.8	15.6	 16
409	 22	89.5	20.6	 16
410	 22	72.0	12.3	 16
411	 22	89.3	17.1	 16
412	 22	251.5	39.0	 16
413	 22	95.3	16.5	 16
414	 22	94.3	15.7	 16
415	 22	90.8	12.7	 16
416	 22	84.8	17.3	 16
417	 22	130.0	19.2	 16
418	 22	98.5	14.1	 16
419	 22	115.3	18.6	 16
420	 22	90.0	15.0	 20
421	 22	193.3	17.7	 16
422	 22	90.8	11.2	 16
423	 22	113.0	15.9	 16
424	 22	399.8	42.6	 16
425	 22	102.8	9.3	 16
426	 22	170.3	22.3	 16
427	 22	140.5	17.1	 16
428	 22	457.8	39.3	 16
429	 22	196.3	21.9	 16
430	 22	148.0	20.3	 16
431	 22	88.3	13.2	 16
432	 22	163.8	16.6	 16
433	 22	292.3	27.9	 16
434	 22	331.3	39.7	 16
435	 22	350.8	45.4	 16
436	 22	90.0	11.3	 16
437	 22	84.3	12.5	 16
438	 22	80.5	12.3	 16
439	 22	96.0	20.8	 16
440	 22	89.8	12.7	 16
441	 22	173.5	30.5	 16
442	 22	101.5	10.3	 16
443	 22	99.3	16.0	 16
444	 22	113.3	22.6	 16
445	 22	69.3	9.2	 16
446	 22	82.3	14.4	 16
447	 22	109.3	17.2	 16
448	 22	202.8	22.9	 16
449	 22	1066.0	139.4	 16
450	 22	152.0	24.7	 16
451	 22	179.5	29.0	 16
452	 22	100.8	17.0	 16
453	 22	90.5	15.0	 16
454	 22	87.3	9.1	 16
455	 22	98.8	16.1	 16
456	 22	199.0	30.3	 16
457	 22	181.8	71.4	 16
458	 22	188.0	22.1	 16
459	 22	118.3	15.5	 16
460	 22	170.8	26.2	 16
461	 22	439.8	38.1	 16
462	 22	302.0	41.4	 16
463	 22	127.8	20.2	 16
464	 22	88.5	63.2	 16
465	 22	75.8	9.8	 16
466	 22	87.0	11.1	 16
467	 22	84.8	16.0	 16
468	 22	204.0	29.9	 16
469	 22	123.3	19.2	 16
470	 22	118.3	19.8	 16
471	 22	201.5	105.7	 16
472	 22	125.5	16.8	 16
473	 22	67.0	9.9	 16
474	 22	70.5	11.0	 16
475	 22	86.5	18.0	 16
476	 22	238.5	42.2	 16
477	 22	324.0	26.8	 16
478	 22	108.3	16.1	 16
479	 22	158.8	20.3	 16
480	 22	75.0	11.0	 16
481	 22	68.0	15.2	 16
482	 22	78.3	11.6	 16
483	 22	70.5	10.4	 16
484	 22	72.5	10.5	 16
485	 22	78.0	12.1	 16
486	 22	216.3	23.6	 16
487	 22	254.0	20.2	 16
488	 22	102.3	18.1	 16
489	 22	99.3	15.9	 16
490	 22	221.8	32.3	 16
491	 22	245.3	19.2	 16
492	 22	146.8	22.6	 16
493	 22	122.0	17.1	 16
494	 22	206.5	22.6	 16
495	 22	93.5	11.3	 16
496	 22	175.8	27.6	 16
497	 22	93.5	30.6	 16
498	 22	88.8	9.3	 16
499	 22	125.3	13.3	 16
500	 22	163.5	42.7	 16
501	 22	103.5	11.2	 16
502	 22	216.5	33.8	 16
503	 22	121.0	17.7	 16
504	 22	152.3	24.2	 16
505	 22	216.5	26.1	 16
506	 22	97.5	13.4	 16
507	 22	143.3	20.0	 16
508	 22	77.3	12.3	 16
509	 22	89.3	17.3	 16
510	 22	97.8	13.4	 16
511	 22	356.0	67.3	 16
512	 22	96.3	26.0	 16
513	 22	76.0	13.5	 16
514	 22	90.5	12.8	 16
515	 22	100.0	19.4	 16
516	 22	104.0	19.7	 16
517	 22	83.8	13.8	 16
518	 22	80.3	11.8	 16
519	 22	75.3	12.7	 16
520	 22	97.8	17.4	 16
521	 22	94.0	12.3	 16
522	 22	102.3	18.4	 16
523	 22	141.5	16.3	 16
524	 22	75.0	12.0	 16
525	 22	78.3	14.6	 16
526	 22	86.3	14.2	 16
527	 22	162.0	21.0	 16
528	 22	107.0	17.1	 16
529	 22	186.3	21.0	 16
530	 22	143.5	18.7	 16
531	 22	104.8	10.9	 16
532	 22	127.0	11.5	 16
533	 22	75.0	8.5	 16
534	 22	77.0	11.9	 16
535	 22	111.0	21.1	 16
536	 22	79.0	11.4	 16
537	 22	148.5	25.6	 16
538	 22	86.3	13.3	 16
539	 22	84.5	15.6	 16
540	 22	76.3	9.6	 16
541	 22	72.0	11.7	 16
542	 22	83.0	12.9	 16
543	 22	181.3	18.7	 16
544	 22	213.0	29.5	 16
545	 22	542.3	60.8	 16
546	 22	474.5	46.7	 16
547	 22	82.5	9.8	 16
548	 22	131.3	18.9	 16
549	 22	135.3	21.6	 16
550	 22	133.3	21.1	 16
551	 22	81.3	11.0	 16
552	 22	212.8	21.6	 16
553	 22	80.8	16.3	 16
554	 22	75.0	11.5	 16
555	 22	66.3	11.9	 16
556	 22	67.3	12.8	 16
557	 22	73.0	14.1	 16
558	 22	82.5	15.9	 16
559	 22	98.8	13.2	 16
560	 22	93.5	14.7	 16
561	 22	82.3	14.4	 16
562	 22	147.8	24.1	 20
563	 22	141.8	17.4	 16
564	 22	142.0	17.4	 16
565	 22	89.0	41.8	 16
566	 22	70.3	14.5	 16
567	 22	71.3	16.2	 16
568	 22	90.3	13.1	 16
569	 22	83.5	8.7	 16
570	 22	95.0	15.2	 16
571	 22	81.3	14.7	 16
572	 22	91.3	12.7	 16
573	 22	107.5	17.2	 16
574	 22	118.5	20.9	 16
575	 22	142.0	19.6	 16
576	 22	243.3	31.3	 16
577	 22	118.0	15.5	 16
578	 22	106.0	16.9	 16
579	 22	127.5	15.0	 16
580	 22	170.0	17.8	 16
581	 22	91.0	14.7	 16
582	 22	94.5	15.7	 16
583	 22	604.0	62.5	 16
584	 22	101.0	21.1	 16
585	 22	168.3	24.4	 16
586	 22	111.3	18.7	 16
587	 22	89.0	8.4	 16
588	 22	80.5	12.1	 16
589	 22	123.3	14.1	 16
590	 22	118.0	15.0	 16
591	 22	200.5	27.9	 16
592	 22	417.3	44.0	 16
593	 22	147.3	22.3	 16
594	 22	112.5	16.6	 16
595	 22	95.3	11.5	 16
596	 22	86.0	9.9	 16
597	 22	80.0	17.6	 16
598	 22	95.5	13.9	 16
599	 22	128.3	14.5	 16
600	 22	106.3	16.2	 16
601	 22	82.8	11.0	 16
602	 22	112.0	13.6	 16
603	 22	102.0	11.2	 16
604	 22	92.5	11.5	 16
605	 22	149.8	21.0	 16
606	 22	110.0	12.4	 16
607	 22	285.3	31.1	 16
608	 22	115.0	13.7	 16
609	 22	135.5	42.3	 16
610	 22	105.3	18.8	 16
611	 22	80.8	11.5	 16
612	 22	138.0	20.5	 16
613	 22	144.8	25.7	 16
614	 22	170.3	26.1	 16
615	 22	261.8	31.1	 16
616	 22	418.8	45.7	 16
617	 22	129.5	20.4	 16
618	 22	97.0	15.7	 16
619	 22	108.3	11.2	 16
620	 22	86.5	15.1	 16
621	 22	107.0	13.3	 16
622	 22	81.8	13.3	 16
623	 22	106.5	17.8	 16
624	 22	91.0	16.1	 16
625	 22	88.5	12.5	 16
626	 22	101.8	20.2	 16
627	 22	102.5	29.3	 16
628	 22	96.0	12.5	 16
629	 22	103.5	11.3	 16
630	 22	167.8	17.1	 16
631	 22	333.0	23.7	 16
632	 22	255.0	28.2	 16
633	 22	131.3	31.1	 16
634	 22	73.5	11.4	 16
635	 22	117.8	16.8	 16
636	 22	116.5	20.0	 16
637	 22	87.0	10.1	 16
638	 22	139.8	23.0	 16
639	 22	69.0	8.8	 16
640	 22	102.8	19.8	 16
641	 22	175.8	17.5	 16
642	 22	102.3	17.6	 16
643	 22	76.5	12.1	 16
644	 22	76.0	15.9	 16
645	 22	73.5	11.4	 16
646	 22	89.3	12.9	 16
647	 22	89.0	14.3	 16
648	 22	120.0	19.8	 16
649	 22	131.0	24.8	 16
650	 22	153.3	26.4	 16
651	 22	116.0	18.0	 16
652	 22	164.3	27.5	 16
653	 22	151.0	27.1	 16
654	 22	96.0	13.3	 16
655	 22	130.0	14.2	 16
656	 22	327.0	51.9	 16
657	 22	666.0	98.8	 16
658	 22	101.5	13.9	 16
659	 22	85.3	10.3	 16
660	 22	129.0	23.9	 16
661	 22	113.5	17.1	 16
662	 22	436.5	52.6	 16
663	 22	91.0	15.5	 16
664	 22	246.5	35.4	 16
665	 22	69.5	11.7	 16
666	 22	77.8	15.2	 16
667	 22	71.3	12.8	 16
668	 22	61.8	9.3	 16
669	 22	66.5	13.4	 16
670	 22	77.0	13.1	 16
671	 22	132.8	19.5	 16
672	 22	100.3	18.9	 16
673	 22	95.5	13.6	 16
674	 22	188.0	25.8	 16
675	 22	115.3	14.8	 16
676	 22	99.5	11.7	 16
677	 22	106.5	18.2	 16
678	 22	73.5	15.5	 16
679	 22	72.8	15.2	 16
680	 22	63.0	13.3	 16
681	 22	113.0	30.7	 16
682	 22	116.3	16.4	 16
683	 22	76.0	12.4	 16
684	 22	77.0	11.5	 16
685	 22	70.3	11.2	 16
686	 22	99.0	13.8	 16
687	 22	134.0	18.6	 16
688	 22	79.5	12.5	 16
689	 22	194.3	30.8	 16
690	 22	365.5	37.0	 16
691	 22	122.8	15.2	 16
692	 22	74.8	14.4	 16
693	 22	188.3	29.2	 16
694	 22	195.0	20.6	 16
695	 22	95.3	13.3	 16
696	 22	107.0	11.7	 16
697	 22	105.3	10.8	 16
698	 22	102.5	18.1	 16
699	 22	75.8	11.7	 16
700	 22	170.8	17.6	 16
701	 22	124.5	13.3	 16
702	 22	86.3	12.3	 16
703	 22	103.8	31.0	 16
704	 22	95.0	15.1	 16
705	 22	331.8	43.2	 20
706	 22	116.8	10.1	 16
707	 22	101.3	13.2	 16
708	 22	265.3	33.3	 16
709	 22	346.3	36.7	 16
710	 22	142.5	15.8	 16
711	 22	6431.0	666.7	 16
  0	 23	112.3	12.7	 16
  1	 23	200.8	26.3	 16
  2	 23	109.3	20.4	 20
  3	 23	141.0	24.9	 16
  4	 23	860.8	87.5	 16
  5	 23	80.0	12.6	 16
  6	 23	162.8	18.4	 16
  7	 23	155.0	20.1	 16
  8	 23	133.5	18.4	 16
  9	 23	98.5	12.8	 16
 10	 23	109.5	23.1	 16
 11	 23	145.3	27.8	 16
 12	 23	92.0	12.1	 16
 13	 23	128.3	18.1	 16
 14	 23	85.8	15.4	 16
 15	 23	100.8	10.3	 16
 16	 23	132.8	16.6	 16
 17	 23	116.8	15.0	 16
 18	 23	101.5	20.7	 16
 19	 23	157.0	20.5	 16
 20	 23	133.8	25.0	 16
 21	 23	78.0	11.9	 16
 22	 23	166.5	19.5	 16
 23	 23	248.3	35.9	 16
 24	 23	445.8	37.3	 16
 25	 23	309.0	37.7	 16
 26	 23	124.5	20.7	 16
 27	 23	97.0	12.7	 16
 28	 23	82.8	11.3	 16
 29	 23	112.5	19.8	 16
 30	 23	220.0	25.1	 16
 31	 23	166.0	24.8	 16
 32	 23	379.8	50.6	 16
 33	 23	325.0	52.0	 16
 34	 23	81.8	12.6	 16
 35	 23	135.5	26.0	 16
 36	 23	111.5	16.3	 16
 37	 23	134.0	28.2	 16
 38	 23	68.3	8.9	 16
 39	 23	144.0	19.7	 16
 40	 23	101.3	15.5	 16
 41	 23	84.3	8.2	 16
 42	 23	88.0	13.4	 16
 43	 23	78.8	10.2	 16
 44	 23	254.3	28.7	 16
 45	 23	230.8	19.3	 16
 46	 23	116.0	12.5	 16
 47	 23	104.3	14.6	 16
 48	 23	117.5	17.8	 16
 49	 23	121.8	21.7	 16
 50	 23	89.5	11.2	 16
 51	 23	205.0	37.6	 16
 52	 23	401.5	40.4	 16
 53	 23	425.8	54.7	 16
 54	 23	227.0	29.4	 16
 55	 23	243.0	28.0	 16
 56	 23	104.5	15.4	 16
 57	 23	124.5	16.1	 16
 58	 23	145.0	63.1	 16
 59	 23	113.3	16.9	 16
 60	 23	116.0	16.9	 16
 61	 23	108.5	11.5	 16
 62	 23	141.5	17.9	 16
 63	 23	117.5	15.2	 16
 64	 23	354.0	57.4	 16
 65	 23	108.3	18.1	 16
 66	 23	77.5	9.9	 16
 67	 23	80.0	8.1	 16
 68	 23	71.0	14.4	 16
 69	 23	104.3	17.6	 16
 70	 23	221.8	35.6	 16
 71	 23	83.3	12.0	 16
 72	 23	105.3	16.5	 16
 73	 23	146.0	17.6	 16
 74	 23	131.3	17.3	 16
 75	 23	156.8	23.2	 16
 76	 23	207.5	36.7	 16
 77	 23	75.3	13.9	 16
 78	 23	79.5	13.2	 16
 79	 23	128.5	15.8	 16
 80	 23	100.8	16.9	 16
 81	 23	79.3	19.1	 16
 82	 23	90.8	12.4	 16
 83	 23	91.3	15.4	 16
 84	 23	97.3	13.1	 16
 85	 23	92.5	11.0	 16
 86	 23	84.3	11.1	 16
 87	 23	254.3	27.8	 16
 88	 23	254.8	27.7	 16
 89	 23	124.5	17.3	 16
 90	 23	90.5	14.6	 16
 91	 23	214.0	29.6	 16
 92	 23	213.5	22.4	 16
 93	 23	359.3	35.6	 16
 94	 23	157.8	20.8	 16
 95	 23	94.3	13.9	 16
 96	 23	100.5	17.9	 16
 97	 23	113.8	16.6	 16
 98	 23	130.0	18.0	 16
 99	 23	167.3	22.7	 16
100	 23	98.3	12.9	 16
101	 23	167.0	29.2	 16
102	 23	506.8	933.2	 16
103	 23	90.8	12.9	 16
104	 23	203.8	26.9	 16
105	 23	193.8	25.9	 16
106	 23	203.8	24.5	 16
107	 23	82.0	11.2	 16
108	 23	266.5	36.5	 16
109	 23	62.0	12.4	 16
110	 23	84.3	14.7	 16
111	 23	229.8	23.4	 16
112	 23	185.0	17.7	 16
113	 23	86.5	13.3	 16
114	 23	82.3	10.9	 16
115	 23	228.8	31.8	 16
116	 23	84.5	11.8	 16
117	 23	139.3	22.4	 16
118	 23	107.3	18.2	 16
119	 23	74.0	8.1	 16
120	 23	130.3	13.1	 16
121	 23	221.3	18.3	 16
122	 23	106.5	15.5	 16
123	 23	231.0	25.8	 16
124	 23	93.8	13.7	 16
125	 23	149.0	18.6	 16
126	 23	110.3	16.4	 16
127	 23	138.3	23.3	 16
128	 23	146.8	15.9	 16
129	 23	177.3	21.8	 16
130	 23	130.5	23.1	 16
131	 23	124.5	16.7	 16
132	 23	259.0	26.7	 16
133	 23	524.3	84.3	 16
134	 23	377.0	47.7	 16
135	 23	168.0	34.2	 16
136	 23	862.5	95.5	 16
137	 23	115.0	15.0	 16
138	 23	247.0	39.5	 16
139	 23	130.8	18.2	 16
140	 23	80.8	12.5	 16
141	 23	85.5	12.6	 16
142	 23	75.5	12.8	 16
143	 23	90.5	19.5	 16
144	 23	136.0	19.6	 20
145	 23	121.8	15.0	 16
146	 23	269.5	43.0	 16
147	 23	96.8	17.7	 16
148	 23	108.0	17.4	 16
149	 23	113.3	18.1	 16
150	 23	81.5	11.6	 16
151	 23	109.0	20.7	 16
152	 23	113.5	20.9	 16
153	 23	129.0	26.8	 16
154	 23	107.0	13.8	 16
155	 23	137.8	19.7	 16
156	 23	266.5	36.1	 16
157	 23	89.8	14.9	 16
158	 23	270.0	43.4	 16
159	 23	134.0	23.7	 16
160	 23	933.5	119.1	 16
161	 23	812.0	81.8	 16
162	 23	75.5	11.0	 16
163	 23	88.5	18.2	 16
164	 23	285.5	31.8	 16
165	 23	84.8	14.0	 16
166	 23	75.3	13.4	 16
167	 23	177.5	28.2	 16
168	 23	112.0	21.1	 16
169	 23	206.5	33.6	 16
170	 23	165.8	22.2	 16
171	 23	81.8	15.5	 16
172	 23	195.5	26.0	 16
173	 23	164.0	26.2	 16
174	 23	206.3	31.7	 16
175	 23	160.8	17.3	 16
176	 23	141.3	29.3	 16
177	 23	135.3	19.5	 16
178	 23	131.8	24.3	 16
179	 23	153.5	20.3	 16
180	 23	157.0	22.9	 16
181	 23	182.3	21.4	 16
182	 23	181.3	24.5	 16
183	 23	102.8	28.0	 16
184	 23	129.5	15.0	 16
185	 23	105.3	21.9	 16
186	 23	75.3	15.1	 16
187	 23	134.3	23.9	 16
188	 23	334.5	38.9	 16
189	 23	234.3	30.5	 16
190	 23	157.0	25.9	 16
191	 23	162.8	21.8	 16
192	 23	112.5	22.6	 16
193	 23	98.0	12.8	 16
194	 23	105.0	14.2	 16
195	 23	108.3	21.7	 16
196	 23	379.8	55.3	 16
197	 23	99.0	24.2	 16
198	 23	89.0	10.6	 16
199	 23	93.3	14.8	 16
200	 23	201.5	29.2	 16
201	 23	95.5	17.7	 16
202	 23	71.8	10.3	 16
203	 23	365.8	40.9	 16
204	 23	124.3	13.2	 16
205	 23	152.5	23.7	 16
206	 23	171.5	25.8	 16
207	 23	87.5	15.5	 16
208	 23	95.3	13.8	 16
209	 23	183.0	22.7	 16
210	 23	253.5	42.6	 16
211	 23	444.8	45.5	 16
212	 23	109.5	12.5	 16
213	 23	728.0	73.5	 16
214	 23	81.3	6.5	 16
215	 23	588.8	52.8	 16
216	 23	166.0	27.8	 16
217	 23	111.5	19.7	 16
218	 23	88.3	43.9	 16
219	 23	687.5	95.4	 16
220	 23	111.3	21.8	 16
221	 23	115.0	11.8	 16
222	 23	128.3	16.7	 16
223	 23	76.8	14.6	 16
224	 23	411.0	46.0	 16
225	 23	165.5	16.8	 16
226	 23	106.5	18.2	 16
227	 23	133.0	18.8	 16
228	 23	121.5	17.8	 16
229	 23	123.8	16.8	 16
230	 23	144.3	20.6	 16
231	 23	436.5	74.8	 16
232	 23	365.5	29.8	 16
233	 23	275.8	39.5	 16
234	 23	95.8	15.7	 16
235	 23	562.5	66.4	 16
236	 23	101.3	16.5	 16
237	 23	67.3	8.4	 16
238	 23	73.3	13.9	 16
239	 23	353.5	30.0	 16
240	 23	97.3	32.6	 16
241	 23	167.5	22.4	 16
242	 23	86.3	13.5	 16
243	 23	115.8	18.0	 16
244	 23	180.0	28.3	 16
245	 23	157.5	24.0	 16
246	 23	81.3	11.6	 16
247	 23	72.8	14.3	 16
248	 23	166.3	26.7	 16
249	 23	154.3	13.3	 16
250	 23	83.0	12.4	 16
251	 23	78.0	12.0	 16
252	 23	151.3	33.7	 16
253	 23	77.8	14.4	 16
254	 23	79.8	16.5	 16
255	 23	76.0	12.7	 16
256	 23	251.5	32.4	 16
257	 23	135.0	13.5	 16
258	 23	192.0	27.0	 16
259	 23	188.0	27.2	 16
260	 23	1407.5	224.6	 16
261	 23	1424.5	106.5	 16
262	 23	1205.0	134.4	 16
263	 23	88.8	15.3	 16
264	 23	72.3	14.1	 16
265	 23	121.8	107.2	 16
266	 23	172.0	16.2	 16
267	 23	105.8	13.3	 16
268	 23	125.8	19.7	 16
269	 23	149.3	19.5	 16
270	 23	187.5	23.6	 16
271	 23	108.8	20.1	 16
272	 23	372.3	72.3	 16
273	 23	6180.0	1080.0	 16
274	 23	98.5	19.4	 16
275	 23	111.3	19.1	 16
276	 23	199.3	20.7	 16
277	 23	82.8	10.4	 16
278	 23	276.5	22.9	 16
279	 23	455.5	49.5	 16
280	 23	121.3	23.1	 16
281	 23	92.5	12.6	 16
282	 23	183.3	18.9	 16
283	 23	333.0	31.4	 16
284	 23	90.0	12.7	 16
285	 23	86.0	12.1	 16
286	 23	107.0	14.2	 16
287	 23	153.0	25.8	 20
288	 23	89.3	17.1	 16
289	 23	442.0	31.7	 16
290	 23	437.5	67.8	 16
291	 23	210.8	27.4	 16
292	 23	158.8	29.9	 16
293	 23	157.5	20.5	 16
294	 23	171.0	28.5	 16
295	 23	143.3	25.4	 16
296	 23	81.3	11.8	 16
297	 23	97.5	15.6	 16
298	 23	210.8	30.1	 16
299	 23	1085.5	191.1	 16
300	 23	129.3	23.8	 16
301	 23	126.8	33.4	 16
302	 23	2138.8	368.4	 16
303	 23	100.8	16.7	 16
304	 23	203.0	20.3	 16
305	 23	186.5	20.5	 16
306	 23	360.5	35.4	 16
307	 23	267.3	47.1	 16
308	 23	82.8	11.1	 16
309	 23	95.8	11.8	 16
310	 23	111.0	19.3	 16
311	 23	220.0	24.5	 16
312	 23	232.5	36.0	 16
313	 23	98.0	17.1	 16
314	 23	187.0	22.9	 16
315	 23	80.3	11.9	 16
316	 23	137.0	16.2	 16
317	 23	95.3	13.0	 16
318	 23	101.0	14.2	 16
319	 23	106.8	59.6	 16
320	 23	119.8	11.5	 16
321	 23	105.3	17.4	 16
322	 23	156.8	26.2	 16
323	 23	95.5	13.6	 16
324	 23	307.5	32.4	 16
325	 23	382.5	36.0	 16
326	 23	146.5	23.6	 16
327	 23	88.0	11.4	 16
328	 23	218.5	22.9	 16
329	 23	86.0	14.4	 16
330	 23	173.3	23.2	 16
331	 23	99.0	12.9	 16
332	 23	139.3	14.7	 16
333	 23	78.8	11.4	 16
334	 23	81.0	15.1	 16
335	 23	79.5	11.8	 16
336	 23	102.8	17.8	 16
337	 23	95.8	9.3	 16
338	 23	160.5	31.0	 16
339	 23	80.3	15.4	 16
340	 23	92.3	15.7	 16
341	 23	114.0	15.7	 16
342	 23	133.5	17.3	 16
343	 23	150.3	24.1	 16
344	 23	185.0	17.3	 16
345	 23	366.0	37.8	 16
346	 23	121.5	20.6	 16
347	 23	97.5	14.7	 16
348	 23	120.3	13.2	 16
349	 23	155.5	28.3	 16
350	 23	115.3	16.2	 16
351	 23	75.0	21.6	 16
352	 23	324.5	29.6	 16
353	 23	88.0	15.6	 16
354	 23	338.0	30.6	 16
355	 23	86.0	13.2	 16
356	 23	282.8	52.1	 16
357	 23	150.0	21.1	 16
358	 23	627.5	46.4	 16
359	 23	354.8	36.0	 16
360	 23	200.0	26.2	 16
361	 23	295.5	40.1	 16
362	 23	887.8	125.3	 16
363	 23	232.5	28.4	 16
364	 23	120.3	15.2	 16
365	 23	253.0	20.3	 16
366	 23	87.5	41.0	 16
367	 23	76.5	13.1	 16
368	 23	112.3	24.0	 16
369	 23	77.0	10.0	 16
370	 23	113.0	20.6	 16
371	 23	80.5	12.6	 16
372	 23	251.8	26.9	 16
373	 23	249.5	31.4	 16
374	 23	86.0	14.0	 16
375	 23	101.0	13.2	 16
376	 23	98.3	13.0	 16
377	 23	215.5	20.7	 16
378	 23	190.3	25.0	 16
379	 23	264.3	21.9	 16
380	 23	175.5	23.2	 16
381	 23	2039.0	171.7	 16
382	 23	202.0	23.7	 16
383	 23	88.5	12.0	 16
384	 23	89.5	10.8	 16
385	 23	104.5	14.9	 16
386	 23	110.8	14.3	 16
387	 23	107.0	12.2	 16
388	 23	87.8	14.6	 16
389	 23	105.5	19.7	 16
390	 23	126.3	18.5	 16
391	 23	654.3	74.2	 16
392	 23	89.0	12.9	 16
393	 23	108.3	17.7	 16
394	 23	166.0	21.3	 16
395	 23	114.5	22.7	 16
396	 23	112.8	16.9	 16
397	 23	359.0	38.8	 16
398	 23	134.5	17.1	 16
399	 23	215.0	32.0	 16
400	 23	353.8	56.6	 16
401	 23	117.5	13.6	 16
402	 23	970.8	107.6	 16
403	 23	4794.0	551.4	 16
404	 23	114.5	10.3	 16
405	 23	1548.5	193.4	 16
406	 23	91.3	13.3	 16
407	 23	103.5	16.2	 16
408	 23	218.8	30.0	 16
409	 23	114.8	17.2	 16
410	 23	115.8	16.1	 16
411	 23	147.8	20.8	 16
412	 23	290.5	47.5	 16
413	 23	254.8	56.9	 16
414	 23	69.5	13.5	 16
415	 23	103.3	13.9	 16
416	 23	118.0	19.8	 16
417	 23	117.0	18.5	 16
418	 23	209.5	22.7	 16
419	 23	144.3	14.2	 16
420	 23	85.3	15.5	 16
421	 23	78.3	11.4	 16
422	 23	334.3	46.1	 16
423	 23	82.3	9.9	 16
424	 23	93.3	17.6	 16
425	 23	92.0	13.9	 16
426	 23	1338.5	142.2	 16
427	 23	209.3	28.5	 16
428	 23	276.5	34.7	 16
429	 23	2266.0	383.4	 20
430	 23	1220.0	242.9	 16
431	 23	87.3	15.5	 16
432	 23	104.5	14.1	 16
433	 23	86.5	10.6	 16
434	 23	217.8	27.5	 16
435	 23	294.0	29.8	 16
436	 23	208.8	32.4	 16
437	 23	247.5	24.6	 16
438	 23	167.8	21.5	 16
439	 23	457.3	52.9	 16
440	 23	90.0	18.8	 16
441	 23	208.5	57.8	 16
442	 23	115.0	19.0	 16
443	 23	112.0	22.2	 16
444	 23	108.3	18.7	 16
445	 23	256.8	32.4	 16
446	 23	324.0	41.5	 16
447	 23	731.0	52.4	 16
448	 23	273.0	34.1	 16
449	 23	155.0	36.9	 16
450	 23	265.3	47.7	 16
451	 23	204.8	29.8	 16
452	 23	208.5	29.1	 16
453	 23	126.3	18.4	 16
454	 23	108.8	23.0	 16
455	 23	780.5	121.5	 16
456	 23	144.8	19.6	 16
457	 23	180.3	29.6	 16
458	 23	429.5	49.3	 16
459	 23	338.3	44.3	 16
460	 23	178.5	30.6	 16
461	 23	546.3	40.1	 16
462	 23	203.5	28.5	 16
463	 23	126.0	13.3	 16
464	 23	211.8	17.0	 16
465	 23	78.8	10.9	 16
466	 23	76.0	12.8	 16
467	 23	86.3	12.7	 16
468	 23	261.8	44.1	 16
469	 23	139.0	17.2	 16
470	 23	80.5	11.1	 16
471	 23	95.8	16.4	 16
472	 23	516.8	54.5	 16
473	 23	230.5	34.5	 16
474	 23	332.5	53.1	 16
475	 23	457.0	114.8	 16
476	 23	225.3	31.1	 16
477	 23	234.5	26.6	 16
478	 23	156.0	13.6	 16
479	 23	403.0	41.0	 16
480	 23	151.8	19.9	 16
481	 23	77.5	13.7	 16
482	 23	108.3	15.2	 16
483	 23	89.0	13.0	 16
484	 23	471.3	80.6	 16
485	 23	236.5	33.8	 16
486	 23	148.3	26.5	 16
487	 23	129.5	17.8	 16
488	 23	117.0	22.3	 16
489	 23	547.8	126.1	 16
490	 23	114.5	17.3	 16
491	 23	95.3	13.2	 16
492	 23	147.5	21.3	 16
493	 23	828.8	68.2	 16
494	 23	133.0	21.7	 16
495	 23	137.0	22.5	 16
496	 23	90.0	19.6	 16
497	 23	751.0	136.8	 16
498	 23	117.8	22.2	 16
499	 23	212.3	36.3	 16
500	 23	101.8	11.5	 16
501	 23	101.5	14.4	 16
502	 23	141.8	21.6	 16
503	 23	98.8	19.5	 16
504	 23	267.0	32.8	 16
505	 23	476.0	40.4	 16
506	 23	120.0	15.9	 16
507	 23	120.8	21.6	 16
508	 23	83.3	11.8	 16
509	 23	190.3	29.5	 16
510	 23	153.3	25.7	 16
511	 23	444.5	60.7	 16
512	 23	94.3	18.9	 16
513	 23	108.0	13.3	 16
514	 23	63.3	8.2	 16
515	 23	72.0	10.6	 16
516	 23	121.5	12.2	 16
517	 23	97.0	22.0	 16
518	 23	142.3	17.0	 16
519	 23	96.8	12.6	 16
520	 23	127.5	16.7	 16
521	 23	846.5	56.3	 16
522	 23	988.0	138.0	 16
523	 23	228.5	28.7	 16
524	 23	353.8	35.7	 16
525	 23	106.5	53.2	 16
526	 23	97.0	20.4	 16
527	 23	216.0	20.8	 16
528	 23	260.3	29.9	 16
529	 23	260.0	21.4	 16
530	 23	283.5	22.7	 16
531	 23	134.3	22.9	 16
532	 23	6055.0	883.9	 16
533	 23	149.5	23.4	 16
534	 23	202.0	26.5	 16
535	 23	304.5	40.5	 16
536	 23	137.0	21.1	 16
537	 23	233.3	28.4	 16
538	 23	96.3	10.9	 16
539	 23	102.0	13.0	 16
540	 23	245.5	33.4	 16
541	 23	98.0	22.6	 16
542	 23	76.3	8.5	 16
543	 23	2166.5	217.9	 16
544	 23	130.3	17.5	 16
545	 23	78.3	16.3	 16
546	 23	93.0	14.8	 16
547	 23	176.3	27.0	 16
548	 23	81.3	16.2	 16
549	 23	331.5	45.9	 16
550	 23	111.0	20.4	 16
551	 23	304.5	43.5	 16
552	 23	103.5	14.7	 16
553	 23	159.3	21.2	 12
554	 23	157.0	30.9	 16
555	 23	121.3	18.9	 16
556	 23	208.0	33.3	 16
557	 23	152.0	20.9	 16
558	 23	156.5	17.6	 16
559	 23	87.5	11.0	 16
560	 23	81.3	14.7	 16
561	 23	2796.3	475.1	 16
562	 23	120.3	34.6	 16
563	 23	168.5	18.9	 16
564	 23	152.5	21.1	 16
565	 23	182.0	27.3	 16
566	 23	460.8	98.5	 16
567	 23	762.8	153.3	 16
568	 23	555.3	106.3	 16
569	 23	115.3	15.5	 16
570	 23	135.3	16.9	 16
571	 23	76.8	13.1	 16
572	 23	164.5	26.9	 20
573	 23	1117.5	118.1	 16
574	 23	248.5	33.5	 16
575	 23	578.8	75.4	 16
576	 23	102.5	16.3	 16
577	 23	75.8	13.1	 16
578	 23	650.8	142.4	 16
579	 23	100.5	16.6	 16
580	 23	74.3	9.3	 16
581	 23	411.8	46.7	 16
582	 23	298.5	40.8	 16
583	 23	84.8	9.6	 16
584	 23	143.0	16.7	 16
585	 23	87.0	22.3	 16
586	 23	674.3	86.1	 16
587	 23	1157.0	208.1	 16
588	 23	106.5	14.2	 16
589	 23	494.3	51.9	 16
590	 23	368.3	56.8	 16
591	 23	92.3	11.8	 16
592	 23	326.0	39.0	 16
593	 23	278.0	38.1	 16
594	 23	554.5	64.9	 16
595	 23	92.0	11.8	 16
596	 23	151.3	31.1	 16
597	 23	71.5	13.5	 16
598	 23	121.3	21.0	 16
599	 23	323.3	39.6	 16
600	 23	111.5	18.0	 16
601	 23	76.0	13.1	 16
602	 23	97.3	13.5	 16
603	 23	1252.3	219.3	 16
604	 23	89.0	13.5	 16
605	 23	275.3	40.5	 16
606	 23	148.3	29.5	 16
607	 23	184.8	29.6	 16
608	 23	544.3	61.8	 16
609	 23	148.3	21.9	 16
610	 23	130.0	25.2	 16
611	 23	278.8	39.2	 16
612	 23	632.0	45.9	 16
613	 23	176.3	17.8	 16
614	 23	1001.8	144.2	 16
615	 23	195.0	22.7	 16
616	 23	225.0	29.0	 16
617	 23	97.5	17.6	 16
618	 23	276.0	31.6	 16
619	 23	202.8	31.5	 16
620	 23	167.5	19.5	 16
621	 23	130.5	18.1	 16
622	 23	167.3	23.9	 16
623	 23	261.5	23.1	 16
624	 23	156.0	14.6	 16
625	 23	167.0	18.5	 16
626	 23	172.0	24.8	 16
627	 23	119.3	13.4	 16
628	 23	188.3	26.7	 16
629	 23	83.0	11.4	 16
630	 23	89.5	15.0	 16
631	 23	221.3	25.5	 16
632	 23	113.8	12.1	 16
633	 23	158.8	23.8	 16
634	 23	511.0	69.4	 16
635	 23	334.8	37.8	 16
636	 23	336.0	43.9	 16
637	 23	327.0	40.3	 16
638	 23	135.0	21.1	 16
639	 23	140.3	20.3	 16
640	 23	370.8	55.9	 16
641	 23	74.5	12.7	 16
642	 23	110.3	16.9	 12
643	 23	95.3	11.9	 16
644	 23	366.5	34.2	 16
645	 23	153.3	18.0	 16
646	 23	220.0	26.7	 16
647	 23	129.8	18.9	 16
648	 23	185.8	21.4	 16
649	 23	170.3	24.3	 16
650	 23	164.5	22.3	 16
651	 23	120.3	21.3	 16
652	 23	93.8	11.9	 16
653	 23	96.5	17.6	 16
654	 23	99.5	12.6	 16
655	 23	104.3	16.4	 16
656	 23	130.0	18.5	 16
657	 23	144.3	26.9	 16
658	 23	156.3	35.6	 16
659	 23	163.5	20.6	 16
660	 23	185.8	19.2	 16
661	 23	87.8	16.1	 16
662	 23	288.0	42.6	 16
663	 23	182.3	26.0	 16
664	 23	171.5	16.8	 16
665	 23	95.8	17.1	 16
666	 23	99.3	14.0	 16
667	 23	95.5	18.9	 16
668	 23	73.5	10.2	 16
669	 23	89.5	12.5	 16
670	 23	78.0	13.2	 16
671	 23	154.0	30.1	 16
672	 23	109.0	15.8	 16
673	 23	88.3	9.9	 16
674	 23	91.3	14.3	 16
675	 23	107.3	15.6	 16
676	 23	192.0	23.4	 16
677	 23	152.3	18.1	 16
678	 23	107.8	18.4	 16
679	 23	78.3	11.1	 16
680	 23	75.8	12.7	 16
681	 23	136.5	21.1	 16
682	 23	409.0	31.6	 16
683	 23	126.3	13.1	 16
684	 23	218.0	40.3	 16
685	 23	255.8	42.5	 16
686	 23	89.0	18.5	 16
687	 23	124.3	16.5	 16
688	 23	351.3	37.5	 16
689	 23	140.5	19.5	 16
690	 23	84.5	14.5	 16
691	 23	104.8	21.1	 16
692	 23	79.0	11.4	 16
693	 23	134.0	19.7	 16
694	 23	245.5	24.5	 16
695	 23	118.3	22.8	 16
696	 23	71.3	11.8	 16
697	 23	97.0	16.9	 16
698	 23	75.5	14.4	 16
699	 23	79.5	13.3	 16
700	 23	294.5	38.1	 16
701	 23	345.3	33.4	 16
702	 23	225.3	31.8	 16
703	 23	253.8	35.0	 16
704	 23	208.0	32.7	 16
705	 23	197.3	48.2	 16
706	 23	157.0	16.5	 16
707	 23	173.8	19.4	 16
708	 23	186.5	23.9	 16
709	 23	179.3	21.4	 16
710	 23	117.3	17.6	 16
711	 23	109.0	16.0	 16
  0	 24	5049.8	1026.5	 16
  1	 24	105.0	24.6	 16
  2	 24	82.3	12.0	 16
  3	 24	94.3	17.7	 16
  4	 24	190.5	50.1	 16
  5	 24	75.0	13.6	 16
  6	 24	161.3	19.5	 16
  7	 24	177.3	17.0	 16
  8	 24	162.0	27.6	 16
  9	 24	96.3	18.6	 16
 10	 24	94.3	16.9	 16
 11	 24	239.8	47.7	 20
 12	 24	95.3	16.4	 16
 13	 24	347.8	42.2	 16
 14	 24	79.3	13.4	 16
 15	 24	209.5	24.5	 16
 16	 24	97.5	29.1	 16
 17	 24	74.0	10.6	 16
 18	 24	111.5	19.7	 16
 19	 24	142.3	13.8	 12
 20	 24	155.5	68.4	 16
 21	 24	79.3	10.2	 16
 22	 24	143.5	23.7	 16
 23	 24	179.0	22.9	 16
 24	 24	540.8	76.0	 16
 25	 24	399.0	57.0	 16
 26	 24	80.5	13.1	 16
 27	 24	99.8	18.0	 16
 28	 24	77.3	15.5	 16
 29	 24	245.0	111.2	 16
 30	 24	176.0	22.1	 16
 31	 24	400.0	37.0	 16
 32	 24	137.8	23.5	 16
 33	 24	158.0	23.3	 16
 34	 24	94.3	25.5	 16
 35	 24	76.5	12.6	 16
 36	 24	179.0	20.8	 16
 37	 24	83.0	14.2	 16
 38	 24	65.3	14.2	 16
 39	 24	95.5	14.0	 16
 40	 24	80.0	15.1	 16
 41	 24	110.0	46.5	 16
 42	 24	94.8	18.1	 16
 43	 24	78.5	13.2	 16
 44	 24	118.8	13.5	 16
 45	 24	357.5	51.2	 16
 46	 24	128.8	15.5	 16
 47	 24	121.3	18.4	 16
 48	 24	108.3	19.7	 16
 49	 24	124.3	19.4	 16
 50	 24	101.0	15.7	 16
 51	 24	137.5	21.0	 16
 52	 24	534.3	58.0	 16
 53	 24	429.8	43.8	 16
 54	 24	306.3	67.2	 16
 55	 24	342.5	33.7	 16
 56	 24	89.3	16.2	 16
 57	 24	99.3	13.3	 16
 58	 24	91.5	9.2	 16
 59	 24	91.8	18.3	 16
 60	 24	80.5	15.0	 16
 61	 24	96.5	13.7	 16
 62	 24	93.8	19.3	 16
 63	 24	101.5	16.2	 16
 64	 24	147.5	25.2	 16
 65	 24	78.0	14.0	 16
 66	 24	87.0	10.4	 16
 67	 24	90.3	13.9	 16
 68	 24	78.0	16.3	 16
 69	 24	109.0	14.9	 16
 70	 24	201.3	29.9	 16
 71	 24	98.0	16.7	 16
 72	 24	86.5	13.4	 16
 73	 24	155.5	22.2	 16
 74	 24	98.3	11.2	 16
 75	 24	103.0	25.6	 16
 76	 24	200.3	27.9	 16
 77	 24	77.0	9.7	 16
 78	 24	91.0	13.4	 16
 79	 24	101.3	15.8	 16
 80	 24	98.0	17.4	 16
 81	 24	76.8	11.9	 16
 82	 24	132.5	20.6	 16
 83	 24	81.0	12.3	 16
 84	 24	83.3	12.8	 16
 85	 24	86.0	15.4	 16
 86	 24	77.5	10.2	 16
 87	 24	105.8	16.6	 16
 88	 24	134.8	14.7	 16
 89	 24	108.3	18.5	 16
 90	 24	84.8	10.6	 16
 91	 24	123.8	35.3	 16
 92	 24	113.5	32.4	 16
 93	 24	120.0	14.5	 16
 94	 24	170.3	19.9	 16
 95	 24	103.5	13.8	 16
 96	 24	109.3	20.4	 16
 97	 24	83.3	14.9	 16
 98	 24	138.5	23.2	 16
 99	 24	106.5	15.6	 16
100	 24	89.8	10.8	 16
101	 24	139.8	20.1	 16
102	 24	193.3	26.2	 16
103	 24	96.0	14.9	 16
104	 24	166.5	28.7	 16
105	 24	146.8	15.2	 16
106	 24	100.0	13.4	 16
107	 24	84.3	17.0	 16
108	 24	110.8	17.3	 12
109	 24	69.3	12.1	 16
110	 24	94.3	14.6	 16
111	 24	108.8	21.2	 16
112	 24	151.3	17.0	 16
113	 24	84.5	13.5	 16
114	 24	91.0	25.8	 16
115	 24	70.5	9.9	 16
116	 24	74.5	10.0	 16
117	 24	82.5	14.5	 16
118	 24	88.8	13.3	 16
119	 24	81.0	11.6	 16
120	 24	111.3	17.6	 16
121	 24	109.3	15.1	 16
122	 24	84.5	15.9	 16
123	 24	118.0	23.7	 16
124	 24	78.3	12.6	 16
125	 24	74.3	11.9	 16
126	 24	96.5	13.1	 16
127	 24	129.3	17.1	 16
128	 24	113.3	18.6	 16
129	 24	107.8	17.9	 16
130	 24	126.0	19.3	 16
131	 24	96.5	16.9	 16
132	 24	133.0	14.9	 16
133	 24	285.8	33.0	 16
134	 24	389.8	40.6	 16
135	 24	122.3	14.1	 16
136	 24	412.3	49.5	 16
137	 24	90.5	15.8	 16
138	 24	139.3	15.0	 16
139	 24	107.5	14.7	 16
140	 24	88.8	15.7	 16
141	 24	78.8	10.8	 16
142	 24	72.0	10.0	 16
143	 24	99.5	81.8	 16
144	 24	123.3	20.7	 16
145	 24	133.8	20.8	 16
146	 24	178.0	24.4	 16
147	 24	82.8	15.5	 16
148	 24	82.3	15.2	 16
149	 24	73.0	7.6	 16
150	 24	87.5	10.3	 16
151	 24	91.0	12.8	 16
152	 24	78.0	10.4	 16
153	 24	83.3	16.0	 16
154	 24	75.0	13.1	 20
155	 24	109.8	18.1	 16
156	 24	134.5	21.5	 16
157	 24	172.3	41.9	 16
158	 24	126.3	16.3	 16
159	 24	90.5	12.5	 16
160	 24	362.8	41.0	 16
161	 24	298.0	40.1	 16
162	 24	83.8	9.3	 16
163	 24	73.8	12.6	 16
164	 24	118.3	14.5	 16
165	 24	79.8	12.3	 16
166	 24	78.5	10.1	 16
167	 24	122.5	17.9	 16
168	 24	114.0	18.3	 16
169	 24	95.5	13.0	 16
170	 24	128.5	21.0	 16
171	 24	91.8	18.5	 16
172	 24	132.3	19.2	 16
173	 24	817.3	122.5	 16
174	 24	107.5	17.1	 16
175	 24	82.5	12.9	 16
176	 24	80.5	15.0	 16
177	 24	99.5	28.4	 16
178	 24	104.8	23.4	 16
179	 24	98.0	18.0	 16
180	 24	258.0	35.6	 16
181	 24	196.3	21.2	 16
182	 24	108.8	20.4	 16
183	 24	97.8	14.9	 16
184	 24	145.0	19.3	 16
185	 24	86.5	12.6	 16
186	 24	82.0	16.6	 16
187	 24	107.0	16.0	 16
188	 24	364.0	32.0	 16
189	 24	470.3	54.0	 16
190	 24	214.3	28.1	 16
191	 24	207.0	36.0	 16
192	 24	126.8	18.2	 16
193	 24	112.3	12.5	 16
194	 24	127.3	43.8	 16
195	 24	95.0	24.3	 16
196	 24	203.0	19.0	 16
197	 24	129.5	19.9	 12
198	 24	116.0	16.8	 16
199	 24	100.8	12.4	 16
200	 24	153.3	22.2	 16
201	 24	73.3	12.9	 16
202	 24	67.3	9.2	 16
203	 24	141.5	17.9	 16
204	 24	86.0	11.6	 16
205	 24	87.3	13.3	 16
206	 24	102.8	15.7	 16
207	 24	82.5	13.9	 16
208	 24	75.3	10.3	 16
209	 24	140.5	10.7	 16
210	 24	103.3	18.3	 16
211	 24	100.5	16.6	 16
212	 24	105.3	14.2	 16
213	 24	156.3	18.0	 16
214	 24	81.0	12.7	 16
215	 24	189.8	24.1	 16
216	 24	70.3	11.8	 16
217	 24	70.0	16.3	 16
218	 24	72.0	6.4	 16
219	 24	249.5	33.2	 16
220	 24	81.3	10.1	 16
221	 24	153.3	38.8	 16
222	 24	81.3	16.7	 16
223	 24	81.8	14.6	 16
224	 24	100.3	16.5	 16
225	 24	138.8	18.0	 16
226	 24	85.5	10.8	 16
227	 24	105.5	13.7	 16
228	 24	72.8	13.2	 16
229	 24	90.3	12.5	 16
230	 24	162.8	23.6	 16
231	 24	246.8	24.9	 16
232	 24	725.8	67.7	 16
233	 24	252.0	27.2	 16
234	 24	85.5	11.7	 16
235	 24	162.5	20.1	 16
236	 24	79.3	14.1	 16
237	 24	66.3	10.8	 16
238	 24	80.5	11.9	 16
239	 24	771.5	81.6	 16
240	 24	112.5	13.7	 16
241	 24	156.3	12.1	 16
242	 24	80.8	13.6	 16
243	 24	85.5	12.4	 16
244	 24	92.5	12.9	 16
245	 24	103.8	13.5	 16
246	 24	76.8	11.2	 16
247	 24	88.0	14.4	 16
248	 24	108.5	16.5	 16
249	 24	125.0	18.2	 16
250	 24	86.0	14.4	 16
251	 24	83.5	17.2	 16
252	 24	158.5	21.4	 16
253	 24	76.0	8.9	 16
254	 24	74.5	9.3	 16
255	 24	80.3	10.6	 16
256	 24	317.3	34.7	 16
257	 24	135.5	14.5	 16
258	 24	226.5	27.9	 16
259	 24	117.5	11.4	 16
260	 24	479.3	65.3	 16
261	 24	440.5	67.5	 16
262	 24	380.8	68.6	 16
263	 24	79.5	12.8	 16
264	 24	71.0	11.1	 16
265	 24	75.5	9.6	 16
266	 24	86.3	13.1	 16
267	 24	105.3	10.1	 16
268	 24	155.3	45.8	 16
269	 24	144.0	22.8	 16
270	 24	105.3	14.5	 16
271	 24	97.0	14.8	 16
272	 24	126.5	15.7	 16
273	 24	1313.0	211.7	 16
274	 24	74.8	11.2	 16
275	 24	109.5	18.6	 16
276	 24	166.8	45.5	 16
277	 24	94.0	18.4	 16
278	 24	174.0	28.1	 16
279	 24	153.5	30.8	 16
280	 24	113.3	18.8	 16
281	 24	124.5	16.5	 16
282	 24	224.5	28.6	 16
283	 24	325.3	33.6	 16
284	 24	80.3	12.8	 16
285	 24	129.0	32.5	 16
286	 24	82.8	14.1	 12
287	 24	78.0	26.0	 16
288	 24	85.3	9.2	 16
289	 24	633.3	54.2	 16
290	 24	145.0	19.0	 16
291	 24	247.3	31.5	 16
292	 24	240.8	32.6	 16
293	 24	113.8	15.9	 16
294	 24	159.5	24.8	 16
295	 24	110.8	17.4	 16
296	 24	79.8	16.0	 20
297	 24	88.0	13.3	 16
298	 24	118.0	21.4	 16
299	 24	250.0	42.5	 16
300	 24	113.3	18.3	 16
301	 24	96.0	28.0	 16
302	 24	144.5	23.1	 16
303	 24	145.8	15.4	 16
304	 24	147.3	17.0	 16
305	 24	185.0	27.9	 16
306	 24	130.0	18.3	 16
307	 24	112.3	17.1	 16
308	 24	78.0	13.4	 16
309	 24	95.3	15.1	 16
310	 24	140.3	17.0	 16
311	 24	154.5	21.9	 16
312	 24	95.8	14.7	 16
313	 24	124.0	13.2	 16
314	 24	138.0	19.9	 16
315	 24	83.8	11.5	 16
316	 24	112.3	15.9	 16
317	 24	91.3	13.5	 16
318	 24	104.5	26.9	 16
319	 24	103.0	16.5	 16
320	 24	194.3	25.6	 16
321	 24	128.5	36.6	 16
322	 24	95.5	15.1	 16
323	 24	94.0	13.0	 16
324	 24	108.3	15.5	 16
325	 24	160.3	20.2	 16
326	 24	223.5	18.3	 16
327	 24	95.0	19.4	 16
328	 24	316.0	65.1	 16
329	 24	110.8	15.2	 16
330	 24	109.3	21.1	 16
331	 24	88.3	13.9	 16
332	 24	108.8	21.8	 16
333	 24	70.8	7.5	 16
334	 24	76.0	11.8	 16
335	 24	90.3	18.7	 16
336	 24	80.5	14.4	 16
337	 24	87.0	14.0	 16
338	 24	108.0	18.7	 16
339	 24	82.0	14.9	 16
340	 24	101.5	15.7	 16
341	 24	138.5	17.2	 16
342	 24	143.0	21.6	 16
343	 24	216.8	24.9	 16
344	 24	131.5	18.1	 16
345	 24	456.0	52.2	 16
346	 24	141.0	25.8	 16
347	 24	105.5	19.5	 16
348	 24	148.3	18.7	 16
349	 24	123.3	17.9	 16
350	 24	131.5	21.8	 16
351	 24	83.3	12.5	 16
352	 24	92.0	14.3	 16
353	 24	94.8	14.0	 16
354	 24	114.3	15.0	 16
355	 24	97.5	16.4	 16
356	 24	417.5	43.4	 16
357	 24	124.5	17.8	 16
358	 24	194.3	23.8	 16
359	 24	252.3	26.7	 16
360	 24	136.8	18.3	 16
361	 24	367.5	26.7	 16
362	 24	354.0	52.4	 16
363	 24	116.3	13.8	 16
364	 24	135.5	20.2	 16
365	 24	159.3	24.7	 16
366	 24	78.8	19.4	 16
367	 24	77.5	10.8	 16
368	 24	66.5	13.1	 16
369	 24	78.8	12.8	 16
370	 24	131.3	15.0	 16
371	 24	94.3	17.1	 16
372	 24	152.3	53.3	 16
373	 24	129.8	20.4	 16
374	 24	81.5	7.9	 16
375	 24	102.0	11.9	 12
376	 24	89.0	17.4	 16
377	 24	167.8	22.6	 16
378	 24	282.5	40.3	 16
379	 24	373.3	34.7	 16
380	 24	113.3	20.6	 16
381	 24	447.3	48.4	 16
382	 24	161.5	17.1	 16
383	 24	94.8	12.9	 16
384	 24	104.0	16.2	 16
385	 24	91.5	15.4	 16
386	 24	107.8	19.1	 16
387	 24	161.8	25.0	 16
388	 24	81.3	13.1	 16
389	 24	119.5	62.4	 16
390	 24	114.5	15.1	 16
391	 24	127.5	20.8	 16
392	 24	78.0	11.8	 16
393	 24	99.5	13.0	 16
394	 24	82.8	12.5	 16
395	 24	79.8	12.5	 16
396	 24	93.3	16.5	 16
397	 24	127.5	17.8	 16
398	 24	104.0	17.2	 16
399	 24	116.8	20.4	 16
400	 24	129.0	17.8	 16
401	 24	84.8	15.4	 16
402	 24	155.3	21.0	 16
403	 24	1999.3	294.6	 16
404	 24	102.5	15.6	 16
405	 24	421.3	66.3	 16
406	 24	71.5	9.6	 16
407	 24	106.0	27.0	 16
408	 24	417.3	41.9	 16
409	 24	236.3	20.5	 16
410	 24	192.8	24.5	 16
411	 24	94.3	13.8	 16
412	 24	109.5	14.5	 16
413	 24	123.0	18.4	 16
414	 24	71.0	14.3	 16
415	 24	84.3	12.9	 16
416	 24	86.3	14.7	 16
417	 24	123.5	16.2	 16
418	 24	115.0	18.5	 16
419	 24	226.5	20.1	 16
420	 24	81.8	14.8	 16
421	 24	83.8	13.6	 16
422	 24	289.8	39.2	 16
423	 24	87.0	14.5	 16
424	 24	87.5	12.8	 16
425	 24	87.3	14.5	 16
426	 24	390.8	32.5	 16
427	 24	102.3	17.6	 16
428	 24	226.8	33.1	 16
429	 24	459.3	56.8	 16
430	 24	220.3	38.8	 16
431	 24	100.3	17.0	 16
432	 24	109.3	27.6	 16
433	 24	83.3	9.6	 16
434	 24	166.3	33.4	 16
435	 24	334.5	26.2	 16
436	 24	134.5	20.4	 16
437	 24	95.5	12.9	 16
438	 24	133.3	19.0	 20
439	 24	346.3	51.2	 16
440	 24	92.0	12.7	 16
441	 24	128.3	14.4	 16
442	 24	122.5	19.6	 16
443	 24	106.5	23.7	 16
444	 24	105.0	16.1	 16
445	 24	179.0	23.2	 16
446	 24	290.5	58.9	 16
447	 24	534.3	40.1	 16
448	 24	199.3	26.4	 16
449	 24	162.5	29.9	 16
450	 24	227.3	29.7	 16
451	 24	161.0	32.2	 16
452	 24	99.3	17.6	 16
453	 24	104.5	17.1	 16
454	 24	85.3	15.9	 16
455	 24	195.8	30.8	 16
456	 24	96.0	23.7	 16
457	 24	85.5	10.4	 16
458	 24	139.0	23.7	 16
459	 24	98.3	10.6	 16
460	 24	85.8	12.0	 16
461	 24	241.0	30.7	 16
462	 24	332.5	33.5	 16
463	 24	123.8	24.5	 16
464	 24	176.3	19.6	 12
465	 24	77.5	8.4	 16
466	 24	68.8	10.3	 16
467	 24	82.3	81.6	 16
468	 24	107.0	14.6	 16
469	 24	120.5	15.4	 16
470	 24	112.3	18.4	 16
471	 24	86.3	12.0	 16
472	 24	237.8	45.7	 16
473	 24	154.5	22.0	 16
474	 24	292.8	29.1	 16
475	 24	171.8	18.6	 16
476	 24	167.0	22.8	 16
477	 24	94.5	10.9	 16
478	 24	77.5	11.6	 16
479	 24	446.3	33.8	 16
480	 24	187.3	25.7	 16
481	 24	112.3	20.0	 16
482	 24	80.8	14.1	 16
483	 24	84.5	10.3	 16
484	 24	210.0	33.2	 16
485	 24	185.0	27.6	 16
486	 24	106.8	13.3	 16
487	 24	92.5	15.6	 16
488	 24	79.0	13.4	 16
489	 24	135.3	24.2	 16
490	 24	91.3	11.5	 16
491	 24	82.8	12.9	 16
492	 24	84.3	14.0	 16
493	 24	508.5	43.0	 16
494	 24	143.0	14.0	 16
495	 24	95.3	12.4	 16
496	 24	94.0	15.9	 16
497	 24	166.0	24.1	 16
498	 24	91.5	13.5	 16
499	 24	91.8	11.8	 16
[truncated: 11,130,704 more chars]
