# Supplementary material for: Identify potential drugs for cardiovascular diseases caused by stress-induced genes in vascular smooth muscle cells
Source: PeerJ. 2016 Sep 28;4:e2478. doi: 10.7717/peerj.2478 (PMC5045879; doi:10.7717/peerj.2478)
Supplement: Supplemental Information 7 [file peerj-04-2478-s007.cel]

[CEL]
Version=3

[HEADER]
Cols=712
Rows=712
TotalX=712
TotalY=712
OffsetX=0
OffsetY=0
GridCornerUL=229 232
GridCornerUR=4506 262
GridCornerLR=4486 4533
GridCornerLL=209 4503
Axis-invertX=0
AxisInvertY=0
swapXY=0
DatHeader=[0..46152]  T 4:CLS=4733 RWS=4733 XIN=3  YIN=3  VE=17        2.0 02/04/03 16:41:10       HG-U133A.1sq                  6
Algorithm=Percentile
AlgorithmParameters=Percentile:75;CellMargin:2;OutlierHigh:1.500;OutlierLow:1.004

[INTENSITY]
NumberCells=506944
CellHeader=X	Y	MEAN	STDV	NPIXELS
  0	  0	104.0	12.4	 16
  1	  0	7538.8	1185.2	 16
  2	  0	106.3	19.6	 16
  3	  0	7518.3	1236.3	 16
  4	  0	81.0	18.1	 16
  5	  0	116.3	19.5	 16
  6	  0	6891.5	1306.3	 16
  7	  0	110.3	13.0	 16
  8	  0	7131.5	1540.4	 16
  9	  0	120.3	43.0	 16
 10	  0	7131.3	1711.0	 16
 11	  0	103.3	15.5	 16
 12	  0	7130.3	1169.3	 16
 13	  0	113.8	48.0	 16
 14	  0	6928.8	1076.8	 16
 15	  0	110.3	17.4	 16
 16	  0	6812.5	1032.8	 16
 17	  0	110.3	17.3	 16
 18	  0	6922.3	871.1	 16
 19	  0	124.5	21.5	 16
 20	  0	6972.8	883.8	 16
 21	  0	105.3	16.4	 16
 22	  0	7080.8	948.4	 16
 23	  0	118.3	13.8	 16
 24	  0	7265.0	1067.8	 16
 25	  0	106.3	14.1	 16
 26	  0	7435.3	1268.3	 16
 27	  0	123.0	17.3	 16
 28	  0	7047.8	1361.5	 16
 29	  0	109.3	18.9	 16
 30	  0	7513.8	1644.2	 16
 31	  0	135.8	31.5	 16
 32	  0	7092.3	1695.0	 16
 33	  0	96.5	15.8	 16
 34	  0	6918.8	1803.8	 16
 35	  0	109.8	18.7	 16
 36	  0	7301.5	1197.1	 16
 37	  0	107.3	17.7	 16
 38	  0	7412.0	914.1	 16
 39	  0	117.8	26.7	 16
 40	  0	7126.3	839.5	 16
 41	  0	108.3	31.5	 16
 42	  0	7044.0	844.8	 16
 43	  0	107.8	20.7	 16
 44	  0	7088.8	813.6	 16
 45	  0	116.5	16.8	 16
 46	  0	6794.3	870.6	 16
 47	  0	138.5	173.6	 16
 48	  0	7131.5	982.8	 16
 49	  0	96.3	17.6	 16
 50	  0	7106.3	1058.9	 16
 51	  0	103.5	15.7	 16
 52	  0	6994.8	1188.2	 16
 53	  0	117.8	16.9	 16
 54	  0	7235.0	1387.8	 16
 55	  0	96.0	13.3	 16
 56	  0	7186.0	1615.9	 16
 57	  0	109.3	13.3	 16
 58	  0	7253.0	1857.0	 16
 59	  0	110.3	18.2	 16
 60	  0	7113.5	1999.0	 20
 61	  0	181.3	60.7	 16
 62	  0	7076.3	2130.1	 16
 63	  0	134.3	37.2	 16
 64	  0	7034.5	1982.3	 16
 65	  0	114.8	25.8	 16
 66	  0	6829.3	1957.8	 16
 67	  0	147.8	30.7	 16
 68	  0	6621.8	1826.5	 16
 69	  0	144.0	54.9	 16
 70	  0	6687.3	1801.5	 16
 71	  0	113.3	20.2	 16
 72	  0	6948.0	1687.2	 16
 73	  0	124.8	19.4	 16
 74	  0	7055.5	1653.7	 16
 75	  0	121.3	19.6	 16
 76	  0	7216.5	1650.1	 16
 77	  0	103.0	16.5	 16
 78	  0	7085.3	1653.0	 16
 79	  0	101.5	19.8	 16
 80	  0	7309.8	1678.8	 16
 81	  0	111.3	13.7	 16
 82	  0	7196.5	1773.6	 16
 83	  0	101.3	18.7	 16
 84	  0	7204.5	1192.5	 16
 85	  0	113.8	15.5	 16
 86	  0	7356.3	1224.7	 16
 87	  0	114.5	16.1	 16
 88	  0	7329.3	1128.2	 16
 89	  0	100.0	12.5	 16
 90	  0	7086.3	984.6	 16
 91	  0	114.5	19.0	 16
 92	  0	7060.8	998.2	 16
 93	  0	113.5	10.8	 16
 94	  0	7406.0	976.3	 16
 95	  0	109.3	17.9	 16
 96	  0	6837.0	924.2	 16
 97	  0	140.3	86.6	 16
 98	  0	7100.5	1084.2	 16
 99	  0	102.3	16.1	 16
100	  0	7189.5	1184.0	 16
101	  0	105.8	22.0	 16
102	  0	6839.3	1196.5	 16
103	  0	109.0	16.0	 16
104	  0	6767.5	1326.6	 16
105	  0	110.3	25.4	 16
106	  0	6827.3	1429.5	 16
107	  0	114.0	17.7	 16
108	  0	6726.0	1041.9	 16
109	  0	120.5	19.2	 16
110	  0	6889.8	959.7	 16
111	  0	104.0	17.3	 16
112	  0	6862.5	936.9	 16
113	  0	108.3	15.3	 16
114	  0	7098.5	736.1	 16
115	  0	103.3	30.8	 16
116	  0	6904.3	880.1	 16
117	  0	102.5	15.1	 16
118	  0	6754.5	796.8	 16
119	  0	106.5	13.1	 16
120	  0	6957.0	866.8	 16
121	  0	111.3	15.9	 16
122	  0	6896.3	995.5	 16
123	  0	98.3	17.8	 16
124	  0	6881.8	1028.7	 16
125	  0	97.5	13.0	 16
126	  0	6767.3	1156.7	 16
127	  0	99.3	19.4	 16
128	  0	6868.8	1307.5	 16
129	  0	110.8	15.5	 16
130	  0	7126.0	1444.5	 16
131	  0	112.3	19.7	 16
132	  0	7081.3	894.2	 16
133	  0	107.3	18.5	 16
134	  0	6908.3	806.9	 16
135	  0	121.0	17.3	 16
136	  0	6617.8	685.4	 16
137	  0	103.0	15.1	 16
138	  0	6851.3	702.2	 16
139	  0	104.5	20.1	 16
140	  0	6762.0	688.0	 16
141	  0	101.8	11.5	 16
142	  0	6761.5	800.4	 16
143	  0	113.8	27.9	 16
144	  0	6341.3	745.6	 16
145	  0	110.3	21.6	 16
146	  0	6550.8	877.8	 16
147	  0	92.0	9.2	 16
148	  0	6760.5	1038.5	 16
149	  0	112.5	13.1	 16
150	  0	6682.3	1117.2	 16
151	  0	114.3	25.7	 16
152	  0	7015.5	1398.9	 16
153	  0	100.8	15.9	 16
154	  0	6984.0	754.3	 16
155	  0	102.3	14.4	 16
156	  0	6930.0	652.5	 16
157	  0	115.5	18.3	 16
158	  0	6703.5	538.8	 16
159	  0	118.5	17.8	 16
160	  0	6447.8	584.8	 16
161	  0	120.5	23.0	 16
162	  0	6091.0	581.0	 16
163	  0	108.3	22.2	 16
164	  0	6278.3	636.1	 16
165	  0	99.3	17.0	 16
166	  0	6420.0	725.2	 16
167	  0	109.8	19.5	 16
168	  0	6495.3	937.8	 16
169	  0	110.3	26.0	 16
170	  0	6400.8	977.0	 16
171	  0	108.5	16.7	 16
172	  0	6450.5	1064.8	 16
173	  0	103.3	20.0	 16
174	  0	6838.5	1301.2	 16
175	  0	111.0	21.2	 16
176	  0	6902.3	1423.9	 16
177	  0	90.0	12.8	 16
178	  0	6547.0	832.7	 16
179	  0	127.5	27.7	 20
180	  0	6316.5	1791.2	 16
181	  0	112.8	27.2	 16
182	  0	6331.5	1782.4	 16
183	  0	127.3	30.9	 16
184	  0	6114.8	1665.6	 16
185	  0	107.0	18.3	 16
186	  0	6374.3	1681.8	 16
187	  0	111.3	24.8	 16
188	  0	6390.0	1476.6	 16
189	  0	108.5	17.7	 16
190	  0	6362.0	1371.0	 16
191	  0	103.3	14.9	 16
192	  0	6290.3	1303.7	 16
193	  0	101.8	21.1	 16
194	  0	6553.0	1331.5	 16
195	  0	105.3	14.9	 16
196	  0	6499.8	1416.9	 16
197	  0	117.0	20.7	 16
198	  0	6497.8	1445.4	 16
199	  0	95.0	11.6	 16
200	  0	6534.5	1513.3	 16
201	  0	126.3	20.4	 16
202	  0	6569.5	1155.4	 16
203	  0	96.5	15.8	 16
204	  0	6500.0	1201.2	 16
205	  0	110.3	16.8	 16
206	  0	6525.5	1141.9	 16
207	  0	105.3	30.0	 16
208	  0	6373.0	1114.3	 16
209	  0	116.5	32.3	 16
210	  0	6234.5	1070.2	 16
211	  0	100.8	18.9	 16
212	  0	6057.5	985.1	 16
213	  0	93.5	10.0	 16
214	  0	6169.8	1178.6	 16
215	  0	90.8	17.6	 16
216	  0	5948.5	1180.2	 16
217	  0	116.3	16.3	 16
218	  0	6153.3	1181.5	 16
219	  0	87.0	13.7	 16
220	  0	6666.5	1440.0	 16
221	  0	90.0	13.4	 16
222	  0	6503.0	1483.3	 16
223	  0	98.5	18.2	 16
224	  0	6026.3	1469.1	 16
225	  0	96.3	17.6	 16
226	  0	6156.0	1107.3	 16
227	  0	103.0	13.6	 16
228	  0	6343.3	955.2	 16
229	  0	89.3	11.5	 16
230	  0	6261.0	849.7	 16
231	  0	99.8	16.6	 16
232	  0	6346.3	863.5	 16
233	  0	88.3	14.4	 16
234	  0	6446.0	762.3	 16
235	  0	58.8	9.8	 16
236	  0	2680.8	356.1	 16
237	  0	57.5	10.5	 16
238	  0	103.5	121.0	 16
239	  0	70.3	13.2	 16
240	  0	6499.8	929.2	 16
241	  0	98.8	20.7	 16
242	  0	5811.5	849.5	 16
243	  0	93.0	16.8	 16
244	  0	5856.8	1041.1	 16
245	  0	89.3	13.3	 16
246	  0	5839.8	1084.0	 16
247	  0	91.8	13.3	 16
248	  0	5950.0	1233.2	 16
249	  0	101.0	21.3	 16
250	  0	5814.3	742.5	 16
251	  0	84.3	7.3	 16
252	  0	5873.8	674.2	 16
253	  0	97.5	12.7	 16
254	  0	5802.5	622.0	 16
255	  0	90.0	14.8	 16
256	  0	5420.5	520.5	 16
257	  0	98.8	13.0	 16
258	  0	5242.8	504.3	 16
259	  0	102.5	16.9	 16
260	  0	5393.5	593.9	 16
261	  0	81.8	12.3	 16
262	  0	5419.8	658.0	 16
263	  0	102.8	30.3	 16
264	  0	5629.5	784.2	 16
265	  0	94.0	14.5	 16
266	  0	5696.0	987.1	 16
267	  0	88.5	7.5	 16
268	  0	5511.5	1052.1	 16
269	  0	88.0	13.6	 16
270	  0	5685.5	1184.3	 16
271	  0	102.3	24.5	 16
272	  0	5416.8	1168.4	 16
273	  0	106.3	17.9	 16
274	  0	5362.5	502.6	 16
275	  0	113.3	23.7	 16
276	  0	5486.5	498.0	 16
277	  0	100.3	16.1	 16
278	  0	5472.3	476.7	 16
279	  0	93.3	11.0	 16
280	  0	5714.3	467.0	 16
281	  0	87.5	14.0	 16
282	  0	6501.3	556.2	 16
283	  0	79.8	14.8	 16
284	  0	7232.8	670.1	 16
285	  0	91.3	20.3	 16
286	  0	6613.5	745.8	 16
287	  0	103.0	15.7	 16
288	  0	5678.3	725.1	 16
289	  0	96.3	13.7	 16
290	  0	5641.5	752.7	 16
291	  0	86.8	14.5	 16
292	  0	5313.5	802.9	 16
293	  0	102.8	23.7	 16
294	  0	5440.3	958.3	 16
295	  0	97.8	18.4	 16
296	  0	5491.0	1124.1	 16
297	  0	96.3	18.4	 16
298	  0	5744.0	1503.6	 20
299	  0	99.3	23.1	 16
300	  0	5548.3	1586.9	 16
301	  0	101.5	21.9	 16
302	  0	5386.0	1485.6	 16
303	  0	109.8	17.5	 16
304	  0	5526.3	1593.3	 16
305	  0	90.5	21.8	 16
306	  0	5808.5	1603.4	 16
307	  0	112.0	17.0	 16
308	  0	5974.8	1620.2	 16
309	  0	100.3	25.4	 16
310	  0	5800.3	1613.0	 16
311	  0	95.3	21.2	 16
312	  0	5941.3	1688.8	 16
313	  0	98.8	14.7	 16
314	  0	6287.0	1710.6	 16
315	  0	97.5	13.1	 16
316	  0	6135.3	1849.9	 16
317	  0	113.8	30.3	 16
318	  0	6247.8	1712.8	 16
319	  0	100.3	15.1	 16
320	  0	6201.3	1520.5	 16
321	  0	102.3	21.4	 16
322	  0	5880.5	1376.2	 16
323	  0	99.3	18.8	 16
324	  0	6036.3	1252.7	 16
325	  0	100.0	19.2	 16
326	  0	6487.8	1265.2	 16
327	  0	98.3	15.1	 16
328	  0	6399.5	1153.8	 16
329	  0	84.8	7.3	 16
330	  0	6520.5	1133.6	 16
331	  0	90.8	16.4	 16
332	  0	6589.8	1166.4	 16
333	  0	98.5	15.6	 16
334	  0	6559.0	1258.2	 16
335	  0	87.0	14.5	 16
336	  0	6505.3	1323.9	 16
337	  0	104.3	28.7	 16
338	  0	6633.0	1372.7	 16
339	  0	111.3	17.4	 16
340	  0	6712.5	1583.2	 16
341	  0	95.3	12.5	 16
342	  0	6626.8	1702.4	 16
343	  0	87.3	13.7	 16
344	  0	6692.3	940.2	 16
345	  0	101.5	20.3	 16
346	  0	6721.3	886.5	 16
347	  0	96.3	12.3	 16
348	  0	6493.5	862.7	 16
349	  0	99.8	19.4	 16
350	  0	6579.0	837.4	 16
351	  0	106.8	15.7	 16
352	  0	6603.3	837.2	 16
353	  0	120.5	20.8	 16
354	  0	6335.8	850.5	 16
355	  0	101.0	17.2	 16
356	  0	6354.5	899.5	 16
357	  0	122.5	30.8	 16
358	  0	6614.3	1100.4	 16
359	  0	110.5	19.1	 16
360	  0	6588.3	1180.7	 16
361	  0	107.0	14.7	 16
362	  0	6534.0	1314.4	 16
363	  0	97.3	18.6	 16
364	  0	6421.0	1333.9	 16
365	  0	90.5	16.1	 16
366	  0	6561.8	1534.3	 16
367	  0	88.3	12.1	 16
368	  0	6462.3	929.4	 16
369	  0	97.3	13.5	 16
370	  0	6760.3	956.5	 16
371	  0	94.3	15.5	 16
372	  0	6864.5	689.2	 16
373	  0	110.3	18.8	 16
374	  0	6699.0	548.7	 16
375	  0	98.8	15.9	 16
376	  0	6467.5	535.2	 16
377	  0	88.8	17.0	 16
378	  0	6707.8	610.6	 16
379	  0	83.8	13.8	 16
380	  0	6505.5	609.0	 16
381	  0	93.3	16.3	 16
382	  0	6493.0	766.5	 16
383	  0	88.0	16.4	 16
384	  0	6380.3	864.5	 16
385	  0	97.5	41.3	 16
386	  0	6378.3	966.1	 16
387	  0	105.3	13.5	 16
388	  0	6889.8	1267.8	 16
389	  0	99.5	17.1	 16
390	  0	6834.0	1359.6	 16
391	  0	100.0	17.5	 16
392	  0	6704.8	935.0	 16
393	  0	99.3	23.0	 16
394	  0	6893.5	805.3	 16
395	  0	101.0	33.5	 16
396	  0	6793.5	667.0	 16
397	  0	92.3	14.0	 16
398	  0	6475.0	725.9	 16
399	  0	91.0	16.2	 16
400	  0	6436.5	714.7	 16
401	  0	106.3	15.3	 16
402	  0	6464.8	652.3	 16
403	  0	105.0	15.6	 16
404	  0	6810.5	719.7	 16
405	  0	112.3	20.2	 16
406	  0	6796.5	871.8	 16
407	  0	100.8	15.8	 16
408	  0	6509.5	889.3	 16
409	  0	102.3	15.3	 16
410	  0	6780.3	1057.2	 16
411	  0	96.5	15.8	 16
412	  0	6586.8	1226.7	 16
413	  0	100.0	10.3	 16
414	  0	6652.8	1389.7	 16
415	  0	105.5	13.8	 16
416	  0	6788.8	1572.9	 20
417	  0	125.8	85.6	 16
418	  0	7017.5	1670.1	 16
419	  0	106.8	15.8	 16
420	  0	7139.3	1691.6	 16
421	  0	93.3	11.2	 16
422	  0	6847.5	1599.5	 16
423	  0	89.5	17.1	 16
424	  0	6209.0	1470.5	 16
425	  0	117.0	24.8	 16
426	  0	6185.8	1503.7	 16
427	  0	93.0	17.2	 16
428	  0	6308.5	1456.2	 16
429	  0	113.0	22.2	 16
430	  0	6427.0	1434.4	 16
431	  0	102.3	14.7	 16
432	  0	6556.8	1521.3	 16
433	  0	109.8	18.0	 16
434	  0	6710.0	1657.8	 16
435	  0	114.3	19.8	 16
436	  0	6955.5	1717.2	 16
437	  0	102.5	14.7	 16
438	  0	6984.3	1871.7	 16
439	  0	99.0	14.8	 16
440	  0	6891.8	1559.6	 16
441	  0	113.5	16.3	 16
442	  0	7028.0	1524.5	 16
443	  0	115.8	23.4	 16
444	  0	7090.8	1435.5	 16
445	  0	115.0	20.3	 16
446	  0	6664.5	1311.1	 16
447	  0	110.3	14.1	 16
448	  0	6684.5	1198.9	 16
449	  0	104.3	37.7	 16
450	  0	6843.8	1185.0	 16
451	  0	104.3	17.0	 16
452	  0	6672.5	1119.9	 16
453	  0	98.8	18.8	 16
454	  0	6832.0	1156.0	 16
455	  0	108.3	20.6	 16
456	  0	7054.0	1101.7	 16
457	  0	101.5	15.3	 16
458	  0	6806.8	1130.8	 16
459	  0	87.8	17.0	 16
460	  0	6788.0	1213.3	 16
461	  0	112.0	20.1	 16
462	  0	6809.5	1247.5	 16
463	  0	95.8	13.5	 16
464	  0	7115.3	1294.8	 16
465	  0	95.3	15.8	 16
466	  0	6929.3	1031.3	 16
467	  0	91.5	12.5	 16
468	  0	7116.8	1077.2	 16
469	  0	90.5	17.4	 16
470	  0	7107.8	968.6	 16
471	  0	83.5	9.1	 16
472	  0	54.3	8.6	 16
473	  0	4029.8	561.2	 16
474	  0	55.5	8.4	 16
475	  0	99.8	22.7	 16
476	  0	52.0	9.8	 16
477	  0	101.0	14.9	 16
478	  0	6883.3	816.9	 16
479	  0	96.0	11.6	 16
480	  0	6846.0	1082.6	 16
481	  0	103.5	15.6	 16
482	  0	6928.0	1105.6	 16
483	  0	96.0	12.7	 16
484	  0	6957.8	1265.3	 16
485	  0	87.0	12.3	 16
486	  0	6865.3	1325.4	 16
487	  0	110.3	17.8	 16
488	  0	6943.5	1274.0	 16
489	  0	107.8	19.1	 16
490	  0	6953.0	1150.4	 16
491	  0	90.5	15.0	 16
492	  0	7141.5	1056.6	 16
493	  0	101.0	14.3	 16
494	  0	6910.3	943.7	 16
495	  0	97.5	16.4	 16
496	  0	7345.5	936.2	 16
497	  0	104.3	38.7	 16
498	  0	6929.5	958.1	 16
499	  0	97.0	16.0	 16
500	  0	6811.5	965.7	 16
501	  0	109.5	22.0	 16
502	  0	6829.8	980.8	 16
503	  0	100.8	15.7	 16
504	  0	6897.8	1126.1	 16
505	  0	94.3	12.5	 16
506	  0	7284.0	1215.6	 16
507	  0	95.8	14.4	 16
508	  0	7470.5	1498.3	 16
509	  0	86.3	16.7	 16
510	  0	7248.0	1252.8	 16
511	  0	113.3	18.0	 16
512	  0	7095.0	1068.1	 16
513	  0	99.3	13.5	 16
514	  0	7075.8	968.3	 16
515	  0	109.8	58.1	 16
516	  0	7355.3	899.4	 16
517	  0	95.8	14.6	 16
518	  0	7306.5	736.9	 16
519	  0	98.0	15.4	 16
520	  0	6888.3	599.7	 16
521	  0	109.3	12.8	 16
522	  0	6940.8	676.6	 16
523	  0	93.5	13.0	 16
524	  0	6816.0	633.6	 16
525	  0	92.3	13.5	 16
526	  0	7059.8	815.1	 16
527	  0	100.8	17.4	 16
528	  0	6916.5	897.6	 16
529	  0	108.3	13.0	 16
530	  0	7234.3	1100.2	 16
531	  0	109.0	19.1	 16
532	  0	7352.8	1218.3	 16
533	  0	95.3	14.7	 16
534	  0	7387.3	1317.1	 16
535	  0	107.0	17.0	 20
536	  0	7156.3	1828.0	 16
537	  0	93.0	22.5	 16
538	  0	7334.0	1645.7	 16
539	  0	103.0	16.1	 16
540	  0	7222.0	1538.4	 16
541	  0	97.3	21.7	 16
542	  0	7349.3	1432.4	 16
543	  0	109.8	14.8	 16
544	  0	7255.3	1356.4	 16
545	  0	92.8	12.5	 16
546	  0	7267.0	1198.2	 16
547	  0	98.5	15.9	 16
548	  0	7357.0	1232.6	 16
549	  0	101.0	13.3	 16
550	  0	7057.8	1060.8	 16
551	  0	110.5	16.5	 16
552	  0	7332.8	1008.6	 16
553	  0	108.5	19.7	 16
554	  0	7587.0	1107.8	 16
555	  0	108.3	16.5	 16
556	  0	7309.3	1122.8	 16
557	  0	102.3	14.0	 16
558	  0	7611.3	1128.6	 16
559	  0	100.5	13.1	 16
560	  0	7619.8	940.5	 16
561	  0	115.3	15.3	 16
562	  0	7419.8	804.7	 16
563	  0	109.3	22.8	 16
564	  0	7235.8	858.6	 16
565	  0	96.5	11.2	 16
566	  0	7501.5	634.1	 16
567	  0	107.3	13.6	 16
568	  0	7441.8	557.8	 16
569	  0	103.3	12.7	 16
570	  0	7489.0	503.7	 16
571	  0	92.0	13.9	 16
572	  0	7149.8	574.7	 16
573	  0	103.0	16.4	 16
574	  0	6914.5	600.1	 16
575	  0	94.3	11.7	 16
576	  0	7158.0	680.4	 16
577	  0	85.5	10.3	 16
578	  0	7828.5	887.2	 16
579	  0	97.0	23.9	 16
580	  0	7744.0	1002.1	 16
581	  0	99.8	11.7	 16
582	  0	7600.8	842.8	 16
583	  0	92.0	14.8	 16
584	  0	7382.8	825.5	 16
585	  0	106.0	20.7	 16
586	  0	7307.5	834.5	 16
587	  0	106.3	16.4	 16
588	  0	7340.8	733.5	 16
589	  0	91.0	17.0	 16
590	  0	7363.3	623.8	 16
591	  0	100.0	11.8	 16
592	  0	7055.3	594.6	 16
593	  0	101.0	12.4	 16
594	  0	7181.0	646.4	 16
595	  0	93.0	21.1	 16
596	  0	6981.0	526.1	 16
597	  0	97.3	10.2	 16
598	  0	6860.8	537.9	 16
599	  0	86.0	11.9	 16
600	  0	7227.3	662.2	 16
601	  0	94.3	19.0	 16
602	  0	7509.8	832.6	 16
603	  0	108.3	15.8	 16
604	  0	7414.0	898.9	 16
605	  0	93.3	10.9	 16
606	  0	7394.3	953.5	 16
607	  0	107.3	9.9	 16
608	  0	7356.0	758.6	 16
609	  0	109.5	13.0	 16
610	  0	7478.3	828.4	 16
611	  0	111.0	13.3	 16
612	  0	7507.3	663.6	 16
613	  0	95.0	12.9	 16
614	  0	7439.8	644.9	 16
615	  0	100.8	18.5	 16
616	  0	7232.8	639.2	 16
617	  0	102.5	12.1	 16
618	  0	7440.3	822.1	 16
619	  0	100.0	15.4	 16
620	  0	7429.0	817.1	 16
621	  0	114.3	20.0	 16
622	  0	7568.5	893.4	 16
623	  0	103.8	17.7	 16
624	  0	7855.0	1109.8	 16
625	  0	100.3	14.6	 16
626	  0	7598.8	1139.8	 16
627	  0	97.3	17.0	 16
628	  0	7707.0	1327.8	 16
629	  0	101.3	21.2	 16
630	  0	7394.8	1161.1	 16
631	  0	106.0	20.1	 16
632	  0	7239.5	1214.0	 16
633	  0	98.3	12.6	 16
634	  0	7533.5	1042.1	 16
635	  0	114.8	23.5	 16
636	  0	7833.5	964.9	 16
637	  0	100.5	11.2	 16
638	  0	7906.0	1097.3	 16
639	  0	101.0	15.6	 16
640	  0	7799.0	1020.1	 16
641	  0	105.8	14.2	 16
642	  0	7454.8	1062.5	 16
643	  0	102.8	11.7	 16
644	  0	7691.0	1132.5	 16
645	  0	92.3	19.5	 16
646	  0	7652.8	1173.3	 16
647	  0	102.5	14.3	 16
648	  0	7674.0	1256.4	 16
649	  0	99.3	10.7	 16
650	  0	7538.3	1405.1	 16
651	  0	104.3	22.6	 16
652	  0	7476.8	1475.3	 16
653	  0	100.3	14.5	 16
654	  0	7476.3	1588.5	 20
655	  0	109.8	22.6	 16
656	  0	7611.8	1370.2	 16
657	  0	104.0	16.2	 16
658	  0	7707.3	1383.1	 16
659	  0	100.5	14.4	 16
660	  0	7391.3	1322.6	 16
661	  0	117.0	21.1	 16
662	  0	7729.5	1335.5	 16
663	  0	105.3	15.8	 16
664	  0	7502.3	1148.7	 16
665	  0	132.3	24.7	 16
666	  0	7434.0	1077.4	 16
667	  0	102.3	13.1	 16
668	  0	7441.5	1157.0	 16
669	  0	122.5	16.2	 16
670	  0	7653.5	1147.7	 16
671	  0	128.3	23.1	 16
672	  0	7685.3	1239.2	 16
673	  0	125.3	20.2	 16
674	  0	7967.5	1372.5	 16
675	  0	101.8	15.7	 16
676	  0	7652.5	1617.0	 16
677	  0	100.8	12.3	 16
678	  0	7760.5	1500.8	 16
679	  0	111.3	17.4	 16
680	  0	7935.8	1241.9	 16
681	  0	102.0	19.6	 16
682	  0	7879.0	1135.2	 16
683	  0	107.0	18.4	 16
684	  0	7677.5	975.9	 16
685	  0	169.8	28.5	 16
686	  0	7464.3	869.2	 16
687	  0	223.3	33.4	 16
688	  0	7462.8	697.5	 16
689	  0	109.0	14.2	 16
690	  0	7268.0	761.7	 16
691	  0	124.3	36.7	 16
692	  0	7517.5	801.1	 16
693	  0	105.8	17.7	 16
694	  0	7419.8	844.9	 16
695	  0	97.8	14.2	 16
696	  0	7208.0	974.5	 16
697	  0	113.5	32.7	 16
698	  0	6882.8	1046.1	 16
699	  0	94.5	15.5	 16
700	  0	7088.5	1443.4	 16
701	  0	91.5	12.0	 16
702	  0	7525.3	1241.3	 16
703	  0	98.5	18.8	 16
704	  0	7690.8	1006.1	 16
705	  0	101.8	14.3	 16
706	  0	8363.5	812.1	 16
707	  0	59.3	8.7	 16
708	  0	109.0	27.7	 16
709	  0	7191.0	745.2	 16
710	  0	189.8	19.8	 16
711	  0	7923.5	748.5	 16
  0	  1	6920.8	832.9	 16
  1	  1	115.0	10.8	 16
  2	  1	6412.0	864.3	 16
  3	  1	117.0	17.4	 16
  4	  1	59.8	10.4	 16
  5	  1	229.5	32.1	 16
  6	  1	136.3	19.0	 16
  7	  1	76.8	12.1	 16
  8	  1	158.5	16.5	 16
  9	  1	86.3	11.4	 16
 10	  1	149.0	21.4	 16
 11	  1	116.3	11.8	 16
 12	  1	91.3	19.7	 16
 13	  1	119.3	16.0	 16
 14	  1	191.0	26.3	 16
 15	  1	174.0	20.9	 16
 16	  1	142.3	14.1	 16
 17	  1	123.0	13.7	 16
 18	  1	82.3	13.1	 16
 19	  1	291.3	39.0	 16
 20	  1	330.0	51.4	 16
 21	  1	71.3	14.2	 16
 22	  1	355.8	67.7	 16
 23	  1	107.0	13.4	 16
 24	  1	276.8	26.6	 16
 25	  1	777.5	121.3	 16
 26	  1	187.3	31.3	 16
 27	  1	263.0	31.8	 16
 28	  1	152.5	28.7	 16
 29	  1	301.3	34.0	 16
 30	  1	127.0	37.0	 16
 31	  1	79.5	12.5	 16
 32	  1	121.3	26.9	 16
 33	  1	128.5	31.2	 16
 34	  1	303.3	52.4	 16
 35	  1	115.0	15.8	 16
 36	  1	153.8	25.1	 16
 37	  1	125.0	22.9	 16
 38	  1	253.3	40.7	 16
 39	  1	152.3	20.4	 16
 40	  1	212.5	30.1	 16
 41	  1	156.0	45.3	 16
 42	  1	813.3	100.9	 16
 43	  1	258.5	45.2	 16
 44	  1	158.3	34.1	 16
 45	  1	641.3	70.5	 16
 46	  1	126.3	16.7	 16
 47	  1	485.5	81.5	 16
 48	  1	143.8	20.6	 16
 49	  1	192.5	34.9	 16
 50	  1	150.8	15.9	 16
 51	  1	174.8	19.5	 16
 52	  1	357.8	73.5	 16
 53	  1	90.5	19.0	 16
 54	  1	91.5	14.1	 16
 55	  1	139.3	24.9	 16
 56	  1	155.8	21.7	 16
 57	  1	213.8	35.8	 16
 58	  1	1577.8	412.2	 16
 59	  1	91.3	25.1	 16
 60	  1	122.0	17.2	 16
 61	  1	95.0	17.6	 16
 62	  1	199.8	28.9	 16
 63	  1	87.3	12.5	 16
 64	  1	241.0	48.3	 20
 65	  1	118.8	20.2	 16
 66	  1	322.8	62.3	 16
 67	  1	209.5	33.3	 16
 68	  1	348.5	70.6	 16
 69	  1	83.0	12.2	 16
 70	  1	107.3	19.0	 16
 71	  1	350.3	92.9	 16
 72	  1	142.8	22.5	 16
 73	  1	539.3	88.5	 16
 74	  1	559.8	179.5	 16
 75	  1	72.0	13.8	 16
 76	  1	179.0	33.1	 16
 77	  1	93.3	23.0	 16
 78	  1	202.5	49.2	 16
 79	  1	66.5	7.7	 16
 80	  1	131.5	21.6	 16
 81	  1	110.5	24.0	 16
 82	  1	264.5	45.0	 16
 83	  1	140.5	19.7	 16
 84	  1	127.3	20.3	 16
 85	  1	107.3	50.2	 16
 86	  1	85.0	16.3	 16
 87	  1	680.8	64.8	 16
 88	  1	152.3	18.7	 16
 89	  1	484.5	72.9	 16
 90	  1	109.5	17.7	 16
 91	  1	205.5	39.2	 16
 92	  1	100.3	16.0	 16
 93	  1	162.8	28.0	 16
 94	  1	206.5	26.5	 16
 95	  1	226.5	25.4	 16
 96	  1	88.0	11.8	 16
 97	  1	289.5	55.1	 16
 98	  1	114.0	17.8	 16
 99	  1	189.0	31.5	 16
100	  1	533.0	107.3	 16
101	  1	74.0	13.0	 16
102	  1	79.5	18.0	 16
103	  1	188.3	44.5	 16
104	  1	95.3	17.9	 16
105	  1	206.5	39.1	 16
106	  1	179.3	24.8	 16
107	  1	170.5	39.8	 16
108	  1	115.3	16.8	 16
109	  1	68.3	10.8	 16
110	  1	103.0	15.8	 16
111	  1	364.8	57.8	 16
112	  1	190.5	26.9	 16
113	  1	187.5	29.4	 16
114	  1	213.5	29.9	 16
115	  1	104.5	22.6	 16
116	  1	138.5	26.2	 16
117	  1	166.8	25.8	 16
118	  1	86.0	13.1	 16
119	  1	195.3	26.4	 16
120	  1	667.5	120.6	 16
121	  1	210.8	72.6	 16
122	  1	279.5	46.2	 16
123	  1	152.5	19.0	 16
124	  1	123.8	16.4	 16
125	  1	123.3	14.5	 16
126	  1	151.3	16.6	 16
127	  1	192.3	30.2	 16
128	  1	198.0	32.1	 16
129	  1	86.5	12.2	 16
130	  1	157.8	28.3	 16
131	  1	139.8	17.9	 16
132	  1	190.0	34.1	 16
133	  1	215.0	30.0	 16
134	  1	220.0	25.5	 16
135	  1	175.0	29.7	 16
136	  1	125.3	16.3	 16
137	  1	87.5	10.8	 16
138	  1	105.3	14.3	 16
139	  1	110.5	18.0	 16
140	  1	103.5	14.6	 16
141	  1	72.5	11.0	 16
142	  1	284.3	31.5	 16
143	  1	185.8	27.5	 16
144	  1	399.0	41.3	 16
145	  1	640.3	151.8	 16
146	  1	228.8	20.1	 16
147	  1	89.3	18.0	 16
148	  1	919.0	238.1	 16
149	  1	129.0	21.9	 16
150	  1	118.0	22.9	 16
151	  1	103.3	17.2	 16
152	  1	247.3	33.4	 16
153	  1	204.5	35.8	 16
154	  1	74.3	12.5	 16
155	  1	79.0	10.7	 16
156	  1	956.5	117.0	 16
157	  1	322.8	37.7	 16
158	  1	118.3	23.6	 16
159	  1	120.3	20.5	 16
160	  1	164.5	28.6	 16
161	  1	396.3	69.9	 16
162	  1	146.5	25.2	 16
163	  1	271.3	24.5	 16
164	  1	505.5	81.9	 16
165	  1	132.8	21.2	 16
166	  1	167.0	33.0	 16
167	  1	317.5	43.2	 16
168	  1	100.8	18.8	 16
169	  1	77.0	12.9	 16
170	  1	207.8	29.1	 16
171	  1	90.0	13.3	 16
172	  1	413.5	74.6	 16
173	  1	118.5	18.5	 16
174	  1	102.5	17.3	 16
175	  1	2904.0	739.9	 16
176	  1	176.0	22.1	 16
177	  1	208.8	56.7	 16
178	  1	131.3	22.8	 16
179	  1	146.3	24.0	 16
180	  1	156.0	22.0	 16
181	  1	195.3	27.8	 16
182	  1	86.0	11.4	 20
183	  1	179.0	33.3	 16
184	  1	123.8	22.6	 16
185	  1	93.5	13.8	 16
186	  1	150.3	17.7	 16
187	  1	243.8	33.2	 16
188	  1	108.8	22.4	 16
189	  1	799.3	210.6	 16
190	  1	86.3	9.9	 16
191	  1	114.0	17.4	 16
192	  1	242.3	20.7	 16
193	  1	174.0	30.5	 16
194	  1	169.5	28.6	 16
195	  1	175.5	21.8	 16
196	  1	156.0	26.5	 16
197	  1	99.5	20.0	 16
198	  1	153.8	21.2	 16
199	  1	157.0	20.0	 16
200	  1	168.0	27.1	 16
201	  1	82.5	12.9	 16
202	  1	550.0	51.2	 16
203	  1	168.0	23.1	 16
204	  1	69.5	9.9	 16
205	  1	131.8	18.4	 16
206	  1	448.5	72.0	 16
207	  1	120.5	20.8	 16
208	  1	91.5	15.1	 16
209	  1	115.3	21.4	 16
210	  1	107.8	22.5	 16
211	  1	449.8	98.6	 16
212	  1	98.8	20.3	 16
213	  1	84.0	15.6	 16
214	  1	142.0	22.0	 16
215	  1	146.8	21.2	 16
216	  1	95.5	13.5	 16
217	  1	894.8	212.5	 16
218	  1	272.3	59.9	 16
219	  1	130.3	26.9	 16
220	  1	82.0	15.3	 16
221	  1	266.3	56.3	 16
222	  1	116.0	29.6	 16
223	  1	854.0	243.3	 16
224	  1	78.8	17.3	 16
225	  1	79.8	14.3	 16
226	  1	275.5	35.4	 16
227	  1	178.8	24.2	 16
228	  1	440.0	74.4	 16
229	  1	306.0	62.6	 16
230	  1	365.8	44.7	 16
231	  1	173.5	21.9	 16
232	  1	92.8	18.6	 16
233	  1	149.8	71.2	 16
234	  1	153.0	30.8	 16
235	  1	44.3	9.8	 16
236	  1	560.8	107.0	 16
237	  1	46.5	8.9	 16
238	  1	73.5	16.3	 16
239	  1	54.3	9.1	 16
240	  1	204.0	28.3	 16
241	  1	119.8	11.6	 16
242	  1	120.3	19.3	 16
243	  1	203.0	50.1	 16
244	  1	201.3	23.2	 16
245	  1	161.8	19.8	 16
246	  1	154.3	24.8	 16
247	  1	126.5	30.7	 16
248	  1	94.0	20.3	 16
249	  1	111.0	27.2	 16
250	  1	137.0	129.4	 16
251	  1	74.5	11.5	 16
252	  1	75.0	17.1	 16
253	  1	250.8	45.7	 16
254	  1	82.5	15.8	 16
255	  1	75.5	13.6	 16
256	  1	404.3	60.5	 16
257	  1	70.0	11.2	 16
258	  1	90.8	17.7	 16
259	  1	276.3	41.2	 16
260	  1	104.3	18.6	 16
261	  1	262.8	44.0	 16
262	  1	86.0	14.8	 16
263	  1	119.5	23.0	 16
264	  1	176.5	11.2	 16
265	  1	238.8	42.7	 16
266	  1	92.5	14.8	 16
267	  1	156.5	24.0	 16
268	  1	207.8	31.4	 16
269	  1	73.5	16.0	 16
270	  1	100.5	14.2	 16
271	  1	75.3	16.9	 16
272	  1	114.8	32.8	 16
273	  1	1175.3	146.0	 16
274	  1	83.3	10.0	 16
275	  1	146.0	17.7	 16
276	  1	1541.8	163.7	 16
277	  1	128.0	21.8	 16
278	  1	97.8	18.2	 16
279	  1	229.3	27.1	 16
280	  1	92.3	17.3	 16
281	  1	162.5	25.8	 16
282	  1	257.0	52.3	 16
283	  1	197.0	21.5	 16
284	  1	121.5	24.0	 16
285	  1	154.5	14.2	 16
286	  1	180.5	25.8	 16
287	  1	117.3	24.0	 16
288	  1	116.5	20.4	 16
289	  1	162.0	16.9	 16
290	  1	181.0	27.2	 16
291	  1	87.3	15.0	 16
292	  1	294.0	31.7	 16
293	  1	227.5	36.3	 16
294	  1	151.5	22.2	 16
295	  1	106.3	14.9	 16
296	  1	82.0	12.7	 16
297	  1	85.3	13.1	 16
298	  1	189.3	25.2	 16
299	  1	71.3	12.7	 16
300	  1	87.3	17.1	 16
301	  1	73.0	12.7	 20
302	  1	126.5	43.3	 16
303	  1	199.0	32.7	 16
304	  1	87.3	11.9	 16
305	  1	351.5	94.6	 16
306	  1	263.5	67.4	 16
307	  1	81.8	13.8	 16
308	  1	129.5	23.7	 16
309	  1	147.0	24.4	 16
310	  1	132.8	24.8	 16
311	  1	515.0	128.9	 16
312	  1	139.3	23.4	 16
313	  1	114.3	24.3	 16
314	  1	805.5	184.5	 16
315	  1	227.8	42.0	 16
316	  1	92.5	16.0	 16
317	  1	149.0	16.3	 16
318	  1	120.5	21.7	 16
319	  1	161.3	29.3	 16
320	  1	151.8	20.9	 16
321	  1	285.3	43.8	 16
322	  1	112.0	14.8	 16
323	  1	178.5	33.7	 16
324	  1	164.3	34.4	 16
325	  1	77.3	14.8	 16
326	  1	148.5	33.4	 16
327	  1	78.3	11.2	 16
328	  1	160.3	27.8	 16
329	  1	467.0	50.7	 16
330	  1	131.5	21.0	 16
331	  1	141.5	25.4	 16
332	  1	315.8	54.6	 16
333	  1	334.3	32.9	 16
334	  1	110.5	16.3	 16
335	  1	1808.8	383.1	 16
336	  1	140.3	25.9	 16
337	  1	682.3	150.8	 16
338	  1	98.3	19.5	 16
339	  1	68.3	12.6	 16
340	  1	255.8	45.7	 16
341	  1	161.8	31.1	 16
342	  1	192.0	20.2	 16
343	  1	181.3	34.7	 16
344	  1	162.0	20.7	 16
345	  1	559.3	72.0	 16
346	  1	115.5	15.1	 16
347	  1	315.8	29.5	 16
348	  1	381.3	44.1	 16
349	  1	209.5	23.9	 16
350	  1	94.8	24.7	 16
351	  1	73.3	12.5	 16
352	  1	150.3	25.7	 16
353	  1	141.8	17.4	 16
354	  1	7371.5	1307.5	 16
355	  1	1496.8	268.4	 16
356	  1	662.0	85.4	 16
357	  1	95.8	17.6	 16
358	  1	139.8	122.4	 16
359	  1	131.3	24.4	 16
360	  1	72.0	19.7	 16
361	  1	54.3	10.5	 16
362	  1	101.3	24.5	 16
363	  1	105.8	23.1	 16
364	  1	97.0	24.4	 16
365	  1	80.8	12.2	 16
366	  1	155.3	26.0	 16
367	  1	218.5	59.1	 16
368	  1	481.0	66.3	 16
369	  1	112.3	15.0	 16
370	  1	90.5	13.3	 16
371	  1	7492.5	702.6	 16
372	  1	129.3	20.1	 16
373	  1	1334.5	167.1	 16
374	  1	109.5	17.2	 16
375	  1	129.3	18.9	 16
376	  1	139.3	14.5	 16
377	  1	242.0	45.1	 16
378	  1	489.0	74.3	 16
379	  1	430.5	69.7	 16
380	  1	101.5	16.2	 16
381	  1	257.3	23.2	 16
382	  1	418.8	52.7	 16
383	  1	335.5	40.3	 16
384	  1	340.3	50.4	 16
385	  1	136.0	61.2	 16
386	  1	115.0	16.6	 16
387	  1	86.0	9.1	 16
388	  1	83.3	15.2	 16
389	  1	63.8	13.1	 16
390	  1	139.0	31.9	 16
391	  1	115.0	21.3	 16
392	  1	103.3	19.4	 16
393	  1	72.3	8.0	 16
394	  1	98.5	20.2	 16
395	  1	292.8	31.0	 16
396	  1	343.3	33.3	 16
397	  1	189.8	25.1	 16
398	  1	170.8	21.3	 16
399	  1	179.5	16.3	 16
400	  1	177.0	32.9	 16
401	  1	98.3	13.5	 16
402	  1	253.8	29.5	 16
403	  1	227.0	28.1	 16
404	  1	840.0	90.0	 16
405	  1	698.3	61.2	 16
406	  1	203.8	22.4	 16
407	  1	139.0	16.6	 16
408	  1	175.0	19.8	 16
409	  1	222.3	32.3	 16
410	  1	155.5	28.0	 16
411	  1	258.0	47.3	 16
412	  1	427.3	47.9	 16
413	  1	176.0	27.3	 16
414	  1	151.5	14.4	 16
415	  1	95.5	52.7	 16
416	  1	109.8	36.5	 16
417	  1	311.0	25.0	 16
418	  1	119.3	18.8	 16
419	  1	125.3	11.9	 16
420	  1	360.3	58.6	 20
421	  1	124.0	17.2	 16
422	  1	176.3	30.7	 16
423	  1	294.8	29.5	 16
424	  1	116.3	19.5	 16
425	  1	112.5	20.7	 16
426	  1	251.3	57.8	 16
427	  1	101.3	23.4	 16
428	  1	75.0	13.7	 16
429	  1	450.0	108.2	 16
430	  1	76.0	12.7	 16
431	  1	211.8	50.0	 16
432	  1	152.8	19.0	 16
433	  1	200.3	26.9	 16
434	  1	280.0	39.5	 16
435	  1	104.3	16.7	 16
436	  1	102.8	18.8	 16
437	  1	96.0	42.3	 16
438	  1	105.0	21.3	 16
439	  1	1193.0	242.5	 16
440	  1	76.8	15.9	 16
441	  1	172.3	27.5	 16
442	  1	211.0	40.5	 16
443	  1	92.3	15.8	 16
444	  1	91.0	14.9	 16
445	  1	122.0	15.3	 16
446	  1	96.5	12.9	 16
447	  1	67.0	15.4	 16
448	  1	134.8	32.6	 16
449	  1	82.8	13.6	 16
450	  1	105.8	14.6	 16
451	  1	186.0	30.8	 16
452	  1	628.0	58.2	 16
453	  1	412.5	64.8	 16
454	  1	159.0	20.9	 16
455	  1	88.3	12.2	 16
456	  1	683.3	74.0	 16
457	  1	898.5	68.5	 16
458	  1	126.3	19.0	 16
459	  1	94.0	17.3	 16
460	  1	543.5	86.0	 16
461	  1	178.5	24.7	 16
462	  1	76.0	16.7	 16
463	  1	88.0	14.7	 16
464	  1	178.5	26.7	 16
465	  1	764.8	55.1	 16
466	  1	218.3	26.0	 16
467	  1	295.0	29.4	 16
468	  1	201.8	24.2	 16
469	  1	112.8	15.2	 16
470	  1	284.8	35.1	 16
471	  1	77.5	14.4	 16
472	  1	50.5	9.5	 16
473	  1	1067.0	154.9	 16
474	  1	55.3	10.5	 16
475	  1	90.0	15.4	 16
476	  1	61.3	10.4	 16
477	  1	314.5	37.1	 16
478	  1	145.0	23.9	 16
479	  1	94.0	19.5	 16
480	  1	81.5	90.0	 16
481	  1	78.0	16.8	 16
482	  1	959.5	198.3	 16
483	  1	171.8	29.5	 16
484	  1	104.0	14.3	 16
485	  1	279.0	30.7	 16
486	  1	82.0	13.4	 16
487	  1	74.5	12.1	 16
488	  1	61.3	9.7	 16
489	  1	104.8	15.9	 16
490	  1	332.3	34.5	 16
491	  1	120.5	15.0	 16
492	  1	78.3	17.4	 16
493	  1	139.3	20.7	 16
494	  1	167.5	19.7	 16
495	  1	186.5	16.2	 16
496	  1	197.8	15.9	 16
497	  1	174.3	39.3	 16
498	  1	70.3	12.1	 16
499	  1	69.8	10.2	 16
500	  1	90.8	13.4	 16
501	  1	186.0	25.7	 16
502	  1	291.3	47.7	 16
503	  1	108.0	21.6	 16
504	  1	110.3	19.7	 16
505	  1	104.8	19.3	 16
506	  1	289.8	29.1	 16
507	  1	134.0	28.7	 16
508	  1	129.3	15.9	 16
509	  1	144.8	28.4	 16
510	  1	418.5	43.2	 16
511	  1	178.3	22.1	 16
512	  1	100.5	13.5	 16
513	  1	1251.5	173.5	 16
514	  1	91.3	10.8	 16
515	  1	372.8	49.1	 16
516	  1	113.5	20.4	 16
517	  1	173.0	29.2	 16
518	  1	879.0	106.5	 16
519	  1	902.0	134.7	 16
520	  1	180.3	19.3	 16
521	  1	75.5	16.4	 16
522	  1	1432.5	225.0	 16
523	  1	156.5	21.3	 16
524	  1	414.8	39.7	 16
525	  1	514.0	62.1	 16
526	  1	245.8	36.7	 16
527	  1	127.3	18.8	 16
528	  1	100.8	20.0	 16
529	  1	272.5	43.1	 16
530	  1	1193.0	243.4	 16
531	  1	83.8	14.4	 16
532	  1	71.8	17.5	 16
533	  1	106.8	19.3	 16
534	  1	211.0	35.6	 16
535	  1	318.3	31.8	 16
536	  1	83.3	14.1	 16
537	  1	79.0	13.4	 16
538	  1	132.0	24.9	 20
539	  1	90.5	13.7	 16
540	  1	203.5	31.7	 16
541	  1	122.0	14.0	 16
542	  1	1062.8	205.5	 16
543	  1	220.3	39.4	 16
544	  1	222.5	21.3	 16
545	  1	108.8	16.4	 16
546	  1	384.0	60.6	 16
547	  1	428.5	63.7	 16
548	  1	86.8	13.2	 16
549	  1	64.8	8.1	 16
550	  1	462.3	100.3	 16
551	  1	172.3	26.0	 16
552	  1	100.8	21.7	 16
553	  1	241.0	51.0	 16
554	  1	97.0	24.5	 16
555	  1	96.3	18.0	 16
556	  1	105.3	26.0	 16
557	  1	273.3	44.5	 16
558	  1	177.8	22.1	 16
559	  1	967.8	49.9	 16
560	  1	5099.3	250.2	 16
561	  1	127.8	19.2	 16
562	  1	751.0	83.1	 16
563	  1	126.3	27.0	 16
564	  1	144.0	18.3	 16
565	  1	123.8	13.8	 16
566	  1	250.8	24.7	 16
567	  1	76.8	12.5	 16
568	  1	1354.0	159.6	 16
569	  1	177.3	17.2	 16
570	  1	74.5	15.2	 16
571	  1	75.3	19.8	 16
572	  1	73.0	17.7	 16
573	  1	162.0	23.5	 16
574	  1	79.8	14.4	 16
575	  1	74.8	14.7	 16
576	  1	106.8	18.4	 16
577	  1	123.8	22.4	 16
578	  1	179.3	28.5	 16
579	  1	181.3	35.7	 16
580	  1	249.0	42.4	 16
581	  1	72.5	8.9	 16
582	  1	285.5	29.8	 16
583	  1	321.8	33.8	 16
584	  1	296.3	35.9	 16
585	  1	268.5	33.3	 16
586	  1	159.0	22.3	 16
587	  1	97.5	17.1	 16
588	  1	130.8	30.3	 16
589	  1	189.3	26.8	 16
590	  1	201.0	27.7	 16
591	  1	91.3	16.6	 16
592	  1	558.0	86.1	 16
593	  1	95.3	20.4	 16
594	  1	101.0	17.6	 16
595	  1	94.3	14.0	 16
596	  1	240.3	27.1	 16
597	  1	236.0	23.5	 16
598	  1	229.5	29.9	 16
599	  1	230.3	31.5	 16
600	  1	258.0	33.0	 16
601	  1	225.0	32.1	 16
602	  1	190.5	27.6	 16
603	  1	214.5	98.7	 16
604	  1	969.0	174.0	 16
605	  1	63.3	10.5	 16
606	  1	117.3	20.7	 16
607	  1	242.8	27.8	 16
608	  1	349.0	35.8	 16
609	  1	7056.0	587.5	 16
610	  1	296.5	36.7	 16
611	  1	532.8	71.6	 16
612	  1	92.0	11.6	 16
613	  1	154.0	28.0	 16
614	  1	98.0	12.7	 16
615	  1	152.0	28.7	 16
616	  1	401.8	32.4	 16
617	  1	356.5	38.3	 16
618	  1	192.0	26.7	 16
619	  1	104.0	11.0	 16
620	  1	137.3	22.9	 16
621	  1	123.3	19.6	 16
622	  1	145.5	33.1	 16
623	  1	223.5	36.3	 16
624	  1	141.3	27.6	 16
625	  1	131.0	19.8	 16
626	  1	425.5	60.7	 16
627	  1	381.8	74.1	 16
628	  1	469.5	44.3	 16
629	  1	166.0	25.5	 16
630	  1	252.8	30.9	 16
631	  1	1084.8	135.3	 16
632	  1	1458.3	192.1	 16
633	  1	1401.3	107.8	 16
634	  1	81.5	10.5	 16
635	  1	97.3	16.8	 16
636	  1	109.5	19.3	 16
637	  1	205.8	32.5	 16
638	  1	102.3	15.3	 16
639	  1	232.8	43.1	 16
640	  1	120.0	22.6	 16
641	  1	237.3	37.5	 16
642	  1	106.0	84.5	 16
643	  1	611.5	67.2	 16
644	  1	1275.3	209.5	 16
645	  1	99.8	13.1	 16
646	  1	86.8	13.9	 16
647	  1	109.3	18.7	 16
648	  1	101.0	20.1	 16
649	  1	90.8	16.8	 16
650	  1	142.8	20.8	 16
651	  1	78.5	19.8	 16
652	  1	580.5	130.2	 16
653	  1	120.3	22.4	 16
654	  1	98.3	17.7	 16
655	  1	518.0	66.2	 16
656	  1	66.0	8.8	 16
657	  1	370.0	71.3	 20
658	  1	85.3	15.9	 16
659	  1	350.0	60.3	 16
660	  1	91.3	14.8	 16
661	  1	87.0	17.7	 16
662	  1	82.0	10.4	 16
663	  1	494.0	88.9	 16
664	  1	290.0	58.2	 16
665	  1	79.5	11.5	 16
666	  1	84.0	22.3	 16
667	  1	1877.3	147.2	 16
668	  1	255.0	37.2	 16
669	  1	216.0	24.9	 16
670	  1	117.5	16.9	 16
671	  1	115.0	16.9	 16
672	  1	251.5	32.2	 16
673	  1	217.8	33.9	 16
674	  1	180.0	26.4	 16
675	  1	346.0	61.2	 16
676	  1	287.8	42.0	 16
677	  1	113.0	15.9	 16
678	  1	135.8	17.6	 16
679	  1	92.5	12.6	 16
680	  1	2364.3	373.2	 16
681	  1	131.5	71.7	 16
682	  1	335.0	57.6	 16
683	  1	165.3	30.0	 16
684	  1	930.0	104.1	 16
685	  1	158.3	24.6	 16
686	  1	211.3	18.7	 16
687	  1	869.8	108.9	 16
688	  1	102.3	20.7	 16
689	  1	595.8	135.7	 16
690	  1	118.3	18.7	 16
691	  1	1994.5	361.6	 16
692	  1	1758.8	282.2	 16
693	  1	73.5	12.5	 16
694	  1	133.3	10.9	 16
695	  1	78.5	13.4	 16
696	  1	89.3	23.4	 16
697	  1	86.8	15.4	 16
698	  1	86.0	18.7	 16
699	  1	97.8	20.5	 16
700	  1	75.3	29.3	 16
701	  1	63.0	15.9	 16
702	  1	207.8	53.0	 16
703	  1	256.8	28.6	 16
704	  1	215.0	28.1	 16
705	  1	154.8	20.4	 16
706	  1	72.3	14.7	 16
707	  1	60.3	10.2	 16
708	  1	6931.5	738.5	 16
709	  1	167.5	30.5	 16
710	  1	6589.5	561.2	 16
711	  1	194.0	26.7	 16
  0	  2	115.5	21.6	 16
  1	  2	6414.3	995.8	 16
  2	  2	99.8	21.6	 16
  3	  2	5564.8	895.2	 16
  4	  2	64.5	9.8	 16
  5	  2	239.5	21.1	 16
  6	  2	147.0	26.1	 16
  7	  2	72.0	14.8	 16
  8	  2	157.8	33.2	 16
  9	  2	82.3	14.2	 16
 10	  2	126.5	52.9	 16
 11	  2	141.0	17.4	 16
 12	  2	86.0	15.1	 16
 13	  2	93.5	16.6	 16
 14	  2	259.8	31.5	 16
 15	  2	270.3	26.9	 16
 16	  2	224.8	22.6	 16
 17	  2	101.3	9.0	 16
 18	  2	76.3	14.5	 16
 19	  2	313.0	31.1	 16
 20	  2	91.3	12.8	 16
 21	  2	68.3	15.3	 16
 22	  2	110.0	28.1	 16
 23	  2	91.3	16.1	 16
 24	  2	389.5	25.4	 16
 25	  2	756.5	90.1	 16
 26	  2	79.0	12.9	 16
 27	  2	238.5	32.7	 16
 28	  2	249.3	20.7	 16
 29	  2	227.3	26.0	 16
 30	  2	122.8	17.0	 16
 31	  2	91.3	13.7	 16
 32	  2	151.3	19.1	 16
 33	  2	116.5	24.4	 16
 34	  2	513.5	67.6	 16
 35	  2	112.3	18.4	 16
 36	  2	378.0	41.1	 16
 37	  2	98.5	13.1	 16
 38	  2	95.0	14.3	 16
 39	  2	188.3	32.4	 16
 40	  2	224.5	25.3	 16
 41	  2	141.0	20.9	 16
 42	  2	290.8	40.8	 16
 43	  2	183.5	16.1	 16
 44	  2	98.3	17.2	 16
 45	  2	355.3	31.2	 16
 46	  2	102.8	15.3	 16
 47	  2	247.3	23.9	 16
 48	  2	138.3	19.3	 16
 49	  2	192.8	29.1	 16
 50	  2	133.3	19.1	 16
 51	  2	195.0	31.2	 16
 52	  2	171.5	21.9	 16
 53	  2	85.5	16.4	 16
 54	  2	116.3	42.0	 16
 55	  2	108.5	19.1	 16
 56	  2	199.3	31.4	 16
 57	  2	295.0	26.8	 16
 58	  2	471.5	113.7	 16
 59	  2	75.0	15.2	 16
 60	  2	111.5	25.5	 16
 61	  2	73.8	10.6	 16
 62	  2	91.8	13.4	 16
 63	  2	97.3	16.5	 16
 64	  2	124.3	22.0	 16
 65	  2	184.8	29.9	 16
 66	  2	175.3	35.5	 16
 67	  2	145.3	19.1	 20
 68	  2	184.8	35.9	 16
 69	  2	77.5	14.5	 16
 70	  2	129.8	21.1	 16
 71	  2	109.0	22.9	 16
 72	  2	105.5	21.4	 16
 73	  2	163.0	25.3	 16
 74	  2	182.0	48.5	 16
 75	  2	85.0	19.7	 16
 76	  2	141.3	76.9	 16
 77	  2	100.5	14.8	 16
 78	  2	123.5	21.0	 16
 79	  2	80.3	14.8	 16
 80	  2	81.3	18.2	 16
 81	  2	164.3	19.2	 16
 82	  2	306.3	56.2	 16
 83	  2	167.0	30.2	 16
 84	  2	107.5	19.0	 16
 85	  2	94.0	48.3	 16
 86	  2	83.3	12.2	 16
 87	  2	276.3	24.6	 16
 88	  2	103.3	18.9	 16
 89	  2	335.0	39.2	 16
 90	  2	107.0	16.0	 16
 91	  2	128.8	26.5	 16
 92	  2	94.8	14.4	 16
 93	  2	127.3	20.3	 16
 94	  2	137.8	16.3	 16
 95	  2	234.0	32.2	 16
 96	  2	87.5	9.6	 16
 97	  2	91.8	14.8	 16
 98	  2	116.0	19.7	 16
 99	  2	299.5	33.1	 16
100	  2	261.8	24.8	 16
101	  2	68.5	8.1	 16
102	  2	63.3	14.0	 16
103	  2	100.3	21.3	 16
104	  2	102.0	14.9	 16
105	  2	496.0	54.8	 16
106	  2	95.3	19.2	 16
107	  2	84.3	20.5	 16
108	  2	81.0	14.7	 16
109	  2	64.8	12.7	 16
110	  2	123.0	12.1	 16
111	  2	282.0	53.0	 16
112	  2	174.3	29.2	 16
113	  2	101.0	16.8	 16
114	  2	157.0	27.8	 16
115	  2	94.3	20.7	 16
116	  2	119.5	18.1	 16
117	  2	111.5	16.4	 16
118	  2	93.0	15.7	 16
119	  2	214.0	26.5	 16
120	  2	134.3	22.3	 16
121	  2	118.8	14.1	 16
122	  2	80.0	16.6	 16
123	  2	113.0	16.0	 16
124	  2	99.8	15.4	 16
125	  2	175.5	28.2	 16
126	  2	141.0	24.2	 16
127	  2	317.8	33.3	 16
128	  2	315.0	53.4	 16
129	  2	76.8	14.6	 16
130	  2	220.3	32.8	 16
131	  2	138.3	25.0	 16
132	  2	239.0	27.8	 16
133	  2	328.5	29.3	 16
134	  2	230.0	75.0	 16
135	  2	89.0	15.8	 16
136	  2	111.8	18.3	 16
137	  2	81.3	14.2	 16
138	  2	85.3	20.5	 16
139	  2	109.3	16.4	 16
140	  2	74.0	14.8	 16
141	  2	68.3	12.0	 16
142	  2	392.8	42.4	 16
143	  2	138.0	27.6	 16
144	  2	342.0	44.4	 16
145	  2	77.5	13.7	 16
146	  2	123.0	17.1	 16
147	  2	106.3	17.7	 16
148	  2	370.8	30.8	 16
149	  2	114.8	16.6	 16
150	  2	78.5	15.6	 16
151	  2	104.0	15.0	 16
152	  2	120.0	21.0	 16
153	  2	131.0	21.6	 16
154	  2	76.8	13.5	 16
155	  2	98.8	16.9	 16
156	  2	214.0	34.8	 16
157	  2	197.3	22.2	 16
158	  2	98.3	18.2	 16
159	  2	153.5	15.9	 16
160	  2	327.3	46.7	 16
161	  2	293.5	26.8	 16
162	  2	75.5	15.4	 16
163	  2	172.0	24.6	 16
164	  2	167.0	19.6	 16
165	  2	116.0	17.4	 16
166	  2	192.5	20.0	 16
167	  2	263.3	33.1	 16
168	  2	74.3	17.5	 16
169	  2	63.5	14.2	 16
170	  2	236.8	46.0	 16
171	  2	77.3	14.2	 16
172	  2	144.8	25.6	 16
173	  2	112.0	13.8	 16
174	  2	112.3	16.9	 16
175	  2	562.5	110.7	 16
176	  2	166.5	22.9	 16
177	  2	70.3	11.5	 16
178	  2	178.3	27.9	 16
179	  2	121.5	17.6	 16
180	  2	89.8	20.4	 16
181	  2	101.0	18.8	 16
182	  2	86.5	18.1	 16
183	  2	89.0	13.2	 16
184	  2	96.0	18.5	 16
185	  2	75.5	12.7	 16
186	  2	132.5	22.2	 20
187	  2	185.5	18.5	 16
188	  2	92.3	17.3	 16
189	  2	140.5	21.6	 16
190	  2	156.0	26.3	 16
191	  2	112.3	43.0	 16
192	  2	215.3	29.3	 16
193	  2	409.8	85.3	 16
194	  2	169.3	85.2	 16
195	  2	211.5	29.3	 16
196	  2	132.3	28.4	 16
197	  2	97.3	17.3	 16
198	  2	94.3	20.7	 16
199	  2	200.0	21.0	 16
200	  2	123.0	14.0	 16
201	  2	69.3	8.8	 16
202	  2	234.0	32.8	 16
203	  2	141.8	22.5	 16
204	  2	68.0	10.2	 16
205	  2	102.5	21.9	 16
206	  2	177.8	26.3	 16
207	  2	135.5	23.3	 16
208	  2	72.5	15.3	 16
209	  2	76.0	13.0	 16
210	  2	79.0	14.0	 16
211	  2	79.0	13.1	 16
212	  2	68.0	10.7	 16
213	  2	75.3	18.7	 16
214	  2	131.0	24.9	 16
215	  2	118.3	20.1	 16
216	  2	87.0	16.9	 16
217	  2	365.8	65.3	 16
218	  2	338.8	40.4	 16
219	  2	129.0	15.6	 16
220	  2	87.3	12.2	 16
221	  2	172.3	18.8	 16
222	  2	95.0	16.1	 16
223	  2	155.3	38.6	 16
224	  2	94.5	23.1	 16
225	  2	73.5	11.6	 16
226	  2	133.5	21.2	 16
227	  2	123.0	18.9	 16
228	  2	98.8	29.1	 16
229	  2	86.3	13.3	 16
230	  2	239.5	42.7	 16
231	  2	99.8	19.9	 16
232	  2	86.0	13.5	 16
233	  2	90.8	15.1	 16
234	  2	87.8	13.7	 16
235	  2	49.5	7.8	 16
236	  2	254.8	38.2	 16
237	  2	43.0	19.7	 16
238	  2	65.3	7.9	 16
239	  2	52.3	7.8	 16
240	  2	100.3	21.2	 16
241	  2	109.0	19.5	 16
242	  2	85.0	12.8	 16
243	  2	147.5	19.8	 16
244	  2	174.5	18.4	 16
245	  2	167.5	28.2	 16
246	  2	215.0	26.9	 16
247	  2	201.3	26.2	 16
248	  2	72.8	12.2	 16
249	  2	89.3	14.5	 16
250	  2	89.8	12.8	 16
251	  2	80.5	16.7	 16
252	  2	70.3	15.4	 16
253	  2	70.0	9.5	 16
254	  2	64.8	11.2	 16
255	  2	65.5	11.4	 16
256	  2	137.5	19.2	 16
257	  2	70.5	22.0	 16
258	  2	105.8	27.7	 16
259	  2	85.3	15.7	 16
260	  2	94.5	24.3	 16
261	  2	113.3	15.4	 16
262	  2	81.0	16.9	 16
263	  2	110.5	19.6	 16
264	  2	199.0	20.4	 16
265	  2	102.0	16.3	 16
266	  2	62.0	13.2	 16
267	  2	451.5	41.6	 16
268	  2	327.3	39.3	 16
269	  2	78.3	20.1	 16
270	  2	92.8	15.7	 16
271	  2	71.5	12.1	 16
272	  2	79.3	10.7	 16
273	  2	255.5	35.4	 16
274	  2	70.0	13.2	 16
275	  2	171.5	19.1	 16
276	  2	390.5	71.4	 16
277	  2	119.3	38.9	 16
278	  2	129.3	16.4	 16
279	  2	408.5	37.7	 16
280	  2	90.5	14.9	 16
281	  2	83.5	8.0	 16
282	  2	103.0	11.7	 16
283	  2	191.0	25.9	 16
284	  2	98.3	15.0	 16
285	  2	142.0	18.6	 16
286	  2	154.0	39.1	 16
287	  2	111.3	23.4	 16
288	  2	75.3	14.1	 16
289	  2	143.5	21.3	 16
290	  2	151.8	19.1	 16
291	  2	74.8	12.6	 16
292	  2	483.0	50.8	 16
293	  2	403.8	44.3	 16
294	  2	134.8	21.7	 16
295	  2	135.8	21.1	 16
296	  2	71.3	10.7	 16
297	  2	76.3	19.2	 16
298	  2	139.5	24.7	 16
299	  2	72.8	11.7	 16
300	  2	65.5	12.6	 16
301	  2	71.8	14.0	 16
302	  2	81.3	18.5	 16
303	  2	200.5	27.2	 16
304	  2	78.3	15.3	 20
305	  2	193.5	154.0	 16
306	  2	112.5	22.0	 16
307	  2	87.5	27.9	 16
308	  2	96.5	19.0	 16
309	  2	126.0	19.1	 16
310	  2	72.8	10.7	 16
311	  2	203.0	43.4	 16
312	  2	74.3	16.9	 16
313	  2	125.3	22.9	 16
314	  2	154.8	26.6	 16
315	  2	129.8	21.6	 16
316	  2	83.8	15.0	 16
317	  2	159.8	24.7	 16
318	  2	108.8	26.8	 16
319	  2	151.3	17.8	 16
320	  2	152.0	19.9	 16
321	  2	193.3	24.9	 16
322	  2	101.3	24.2	 16
323	  2	86.3	13.3	 16
324	  2	115.3	16.8	 16
325	  2	78.5	13.9	 16
326	  2	83.8	16.3	 16
327	  2	79.3	10.0	 16
328	  2	125.8	24.5	 16
329	  2	985.3	103.4	 16
330	  2	155.8	17.4	 16
331	  2	126.0	20.3	 16
332	  2	65.0	13.1	 16
333	  2	182.3	30.1	 16
334	  2	152.5	26.4	 16
335	  2	173.3	32.7	 16
336	  2	144.3	16.8	 16
337	  2	186.0	28.8	 16
338	  2	87.3	16.4	 16
339	  2	73.0	14.4	 16
340	  2	66.3	12.7	 16
341	  2	92.3	14.2	 16
342	  2	165.5	15.4	 16
343	  2	153.3	18.9	 16
344	  2	149.5	23.8	 16
345	  2	586.8	69.9	 16
346	  2	143.5	25.1	 16
347	  2	335.3	61.3	 16
348	  2	503.8	57.1	 16
349	  2	457.8	60.3	 16
350	  2	83.0	12.6	 16
351	  2	66.3	13.0	 16
352	  2	136.5	22.0	 16
353	  2	99.3	18.7	 16
354	  2	1906.5	312.3	 16
355	  2	291.5	34.9	 16
356	  2	273.0	36.9	 16
357	  2	175.5	42.4	 16
358	  2	101.3	21.8	 16
359	  2	92.0	12.6	 16
360	  2	74.0	13.7	 16
361	  2	69.3	16.1	 16
362	  2	66.3	11.8	 16
363	  2	78.3	8.7	 16
364	  2	74.5	13.1	 16
365	  2	75.3	14.1	 16
366	  2	68.0	12.2	 16
367	  2	81.3	11.5	 16
368	  2	76.8	12.9	 16
369	  2	92.8	12.7	 16
370	  2	88.5	18.2	 16
371	  2	2152.3	295.0	 16
372	  2	111.8	22.0	 16
373	  2	150.0	20.5	 16
374	  2	105.0	13.1	 16
375	  2	79.3	16.3	 16
376	  2	149.8	18.1	 16
377	  2	77.5	14.4	 16
378	  2	154.3	19.0	 16
379	  2	199.8	112.4	 16
380	  2	108.0	18.9	 16
381	  2	112.5	19.5	 16
382	  2	236.3	18.1	 16
383	  2	210.8	24.0	 16
384	  2	103.8	13.6	 16
385	  2	97.5	27.0	 16
386	  2	67.5	11.8	 16
387	  2	90.0	14.3	 16
388	  2	61.5	10.6	 16
389	  2	65.3	12.8	 16
390	  2	86.3	20.5	 16
391	  2	112.3	21.6	 16
392	  2	93.0	14.1	 16
393	  2	81.5	11.6	 16
394	  2	90.3	10.7	 16
395	  2	186.0	26.1	 16
396	  2	305.3	25.0	 16
397	  2	90.5	15.9	 16
398	  2	188.0	30.5	 16
399	  2	143.3	15.5	 16
400	  2	189.0	21.4	 16
401	  2	79.3	14.3	 16
402	  2	187.5	21.5	 16
403	  2	206.3	30.0	 16
404	  2	743.0	65.6	 16
405	  2	768.3	74.5	 16
406	  2	163.3	18.5	 16
407	  2	149.3	24.5	 16
408	  2	161.3	16.6	 16
409	  2	104.5	17.6	 16
410	  2	119.0	16.0	 16
411	  2	133.5	20.5	 16
412	  2	367.0	49.2	 16
413	  2	216.8	29.0	 16
414	  2	323.0	23.8	 16
415	  2	110.3	20.6	 16
416	  2	107.5	18.2	 16
417	  2	98.5	14.3	 16
418	  2	182.5	24.4	 16
419	  2	107.3	20.0	 16
420	  2	195.3	23.5	 16
421	  2	139.5	19.6	 16
422	  2	241.3	28.3	 16
423	  2	465.3	59.5	 20
424	  2	69.0	9.6	 16
425	  2	85.8	16.2	 16
426	  2	78.0	14.1	 16
427	  2	64.0	13.5	 16
428	  2	72.0	10.3	 16
429	  2	87.5	17.9	 16
430	  2	65.0	10.4	 16
431	  2	152.3	21.8	 16
432	  2	123.5	19.1	 16
433	  2	159.3	21.7	 16
434	  2	207.5	43.6	 16
435	  2	86.3	11.7	 16
436	  2	57.3	8.0	 16
437	  2	70.5	13.1	 16
438	  2	62.0	8.3	 16
439	  2	191.3	39.7	 16
440	  2	72.3	17.3	 16
441	  2	187.5	22.6	 16
442	  2	136.3	16.7	 16
443	  2	86.8	12.2	 16
444	  2	65.8	11.8	 16
445	  2	92.3	14.1	 16
446	  2	96.5	17.4	 16
447	  2	64.0	11.0	 16
448	  2	58.5	9.2	 16
449	  2	92.3	43.8	 16
450	  2	95.3	13.7	 16
451	  2	231.0	38.5	 16
452	  2	472.8	46.6	 16
453	  2	411.8	36.0	 16
454	  2	208.0	36.2	 16
455	  2	101.5	18.8	 16
456	  2	639.8	79.4	 16
457	  2	894.5	53.9	 16
458	  2	159.8	14.8	 16
459	  2	90.5	18.1	 16
460	  2	390.5	49.6	 16
461	  2	173.5	19.9	 16
462	  2	61.8	10.0	 16
463	  2	74.5	13.1	 16
464	  2	248.5	43.8	 16
465	  2	621.8	62.6	 16
466	  2	166.3	14.4	 16
467	  2	359.5	42.1	 16
468	  2	181.5	33.1	 16
469	  2	101.3	14.6	 16
470	  2	242.3	30.0	 16
471	  2	78.0	11.5	 16
472	  2	55.3	12.2	 16
473	  2	482.0	79.2	 16
474	  2	47.3	10.6	 16
475	  2	73.3	14.5	 16
476	  2	59.0	12.3	 16
477	  2	189.8	23.0	 16
478	  2	83.5	12.6	 16
479	  2	96.0	22.7	 16
480	  2	76.3	12.8	 16
481	  2	67.0	11.1	 16
482	  2	241.5	47.2	 16
483	  2	88.3	13.9	 16
484	  2	132.3	22.6	 16
485	  2	154.0	21.0	 16
486	  2	81.3	15.5	 16
487	  2	64.3	10.5	 16
488	  2	65.8	12.2	 16
489	  2	77.3	12.1	 16
490	  2	164.8	24.0	 16
491	  2	101.5	22.5	 16
492	  2	68.5	14.2	 16
493	  2	238.0	44.7	 16
494	  2	101.3	22.9	 16
495	  2	77.3	12.3	 16
496	  2	153.5	30.1	 16
497	  2	262.3	29.5	 16
498	  2	63.0	10.5	 16
499	  2	72.3	14.1	 16
500	  2	90.3	16.1	 16
501	  2	160.0	18.0	 16
502	  2	126.3	18.4	 16
503	  2	85.5	11.4	 16
504	  2	68.3	10.5	 16
505	  2	67.5	12.2	 16
506	  2	279.3	41.1	 16
507	  2	138.3	27.3	 16
508	  2	111.5	8.8	 16
509	  2	192.8	35.7	 16
510	  2	189.3	19.7	 16
511	  2	169.3	21.1	 16
512	  2	72.0	12.2	 16
513	  2	414.5	71.3	 16
514	  2	130.0	19.1	 16
515	  2	128.3	20.8	 16
516	  2	89.0	16.6	 16
517	  2	150.3	20.9	 16
518	  2	341.0	45.5	 16
519	  2	303.0	26.9	 16
520	  2	73.3	9.2	 16
521	  2	70.0	14.3	 16
522	  2	228.8	44.6	 16
523	  2	94.8	15.9	 16
524	  2	956.3	84.8	 16
525	  2	368.0	39.0	 16
526	  2	302.0	55.2	 16
527	  2	115.5	19.0	 16
528	  2	100.3	19.5	 16
529	  2	143.8	19.6	 16
530	  2	202.3	34.9	 16
531	  2	81.8	26.6	 16
532	  2	54.0	6.0	 16
533	  2	171.3	33.5	 16
534	  2	181.3	27.0	 16
535	  2	88.5	16.8	 16
536	  2	62.3	14.3	 16
537	  2	94.8	15.9	 16
538	  2	100.3	17.3	 16
539	  2	76.3	13.4	 16
540	  2	103.5	14.3	 16
541	  2	93.8	12.7	 16
542	  2	222.5	44.2	 20
543	  2	525.3	42.5	 16
544	  2	217.0	22.6	 16
545	  2	254.3	35.8	 16
546	  2	134.5	27.0	 16
547	  2	171.0	21.6	 16
548	  2	68.0	13.6	 16
549	  2	75.3	10.7	 16
550	  2	110.8	15.3	 16
551	  2	124.8	17.5	 16
552	  2	81.5	12.0	 16
553	  2	96.0	17.1	 16
554	  2	71.0	10.5	 16
555	  2	63.0	9.0	 16
556	  2	106.8	17.6	 16
557	  2	205.3	29.7	 16
558	  2	178.5	18.5	 16
559	  2	368.8	55.3	 16
560	  2	4781.5	368.6	 16
561	  2	160.3	22.8	 16
562	  2	292.0	46.0	 16
563	  2	115.8	18.4	 16
564	  2	143.0	27.9	 16
565	  2	160.3	31.8	 16
566	  2	112.5	26.3	 16
567	  2	78.0	14.8	 16
568	  2	180.3	24.5	 16
569	  2	105.3	11.8	 16
570	  2	81.8	28.1	 16
571	  2	78.3	13.8	 16
572	  2	67.3	12.4	 16
573	  2	192.8	28.4	 16
574	  2	67.8	11.5	 16
575	  2	61.3	7.8	 16
576	  2	68.0	15.2	 16
577	  2	80.0	20.1	 16
578	  2	159.5	28.2	 16
579	  2	122.8	21.0	 16
580	  2	237.5	30.5	 16
581	  2	116.0	25.2	 16
582	  2	246.0	34.6	 16
583	  2	353.3	53.1	 16
584	  2	167.3	24.2	 16
585	  2	104.3	15.2	 16
586	  2	144.8	24.0	 16
587	  2	161.0	265.0	 16
588	  2	95.8	20.6	 16
589	  2	198.8	25.8	 16
590	  2	161.8	25.3	 16
591	  2	58.3	9.9	 16
592	  2	107.0	20.3	 16
593	  2	78.5	14.4	 16
594	  2	90.0	18.8	 16
595	  2	83.0	16.9	 16
596	  2	215.8	21.3	 16
597	  2	266.5	36.5	 16
598	  2	290.0	23.9	 16
599	  2	280.3	26.3	 16
600	  2	240.5	29.6	 16
601	  2	206.8	28.5	 16
602	  2	137.5	15.0	 16
603	  2	112.3	18.4	 16
604	  2	170.0	27.5	 16
605	  2	70.0	12.0	 16
606	  2	65.5	12.9	 16
607	  2	98.8	14.6	 16
608	  2	166.0	27.4	 16
609	  2	1575.8	366.5	 16
610	  2	178.3	22.0	 16
611	  2	68.3	10.0	 16
612	  2	121.0	21.3	 16
613	  2	69.0	12.6	 16
614	  2	97.3	19.8	 16
615	  2	68.5	15.4	 16
616	  2	95.8	15.5	 16
617	  2	99.0	18.3	 16
618	  2	89.0	11.7	 16
619	  2	78.0	10.0	 16
620	  2	134.3	16.0	 16
621	  2	89.0	39.9	 16
622	  2	141.8	24.7	 16
623	  2	114.8	18.3	 16
624	  2	142.5	18.5	 16
625	  2	117.3	17.9	 16
626	  2	197.0	28.4	 16
627	  2	126.3	21.5	 16
628	  2	917.8	90.2	 16
629	  2	123.3	20.4	 16
630	  2	140.5	22.8	 16
631	  2	112.8	22.5	 16
632	  2	206.5	38.5	 16
633	  2	207.3	34.2	 16
634	  2	89.8	12.2	 16
635	  2	71.0	14.8	 16
636	  2	96.3	15.9	 16
637	  2	206.3	24.7	 16
638	  2	84.3	18.2	 16
639	  2	102.3	14.4	 16
640	  2	155.5	22.6	 16
641	  2	138.0	19.7	 16
642	  2	105.5	16.5	 16
643	  2	161.8	29.1	 16
644	  2	362.0	32.7	 16
645	  2	74.5	15.7	 16
646	  2	95.3	13.0	 16
647	  2	157.5	18.2	 16
648	  2	75.3	13.6	 16
649	  2	66.5	7.3	 16
650	  2	127.5	21.6	 16
651	  2	105.8	64.8	 16
652	  2	109.5	18.9	 16
653	  2	88.5	12.3	 16
654	  2	97.0	17.1	 16
655	  2	177.8	27.8	 16
656	  2	66.5	9.8	 16
657	  2	235.3	38.3	 16
658	  2	60.3	14.2	 16
659	  2	154.8	26.8	 16
660	  2	82.0	13.5	 20
661	  2	93.8	17.0	 16
662	  2	61.3	11.2	 16
663	  2	152.8	21.3	 16
664	  2	111.3	15.7	 16
665	  2	71.3	13.2	 16
666	  2	93.5	22.5	 16
667	  2	829.8	51.4	 16
668	  2	120.0	15.7	 16
669	  2	122.0	17.4	 16
670	  2	102.3	16.4	 16
671	  2	123.8	12.1	 16
672	  2	160.0	20.3	 16
673	  2	162.3	29.6	 16
674	  2	372.5	44.4	 16
675	  2	146.5	21.6	 16
676	  2	199.8	30.4	 16
677	  2	141.3	17.4	 16
678	  2	126.5	24.1	 16
679	  2	155.3	17.2	 16
680	  2	600.5	122.2	 16
681	  2	73.0	13.1	 16
682	  2	85.5	13.0	 16
683	  2	120.5	19.2	 16
684	  2	533.5	75.0	 16
685	  2	103.5	14.0	 16
686	  2	405.0	33.8	 16
687	  2	166.5	23.6	 16
688	  2	90.0	19.0	 16
689	  2	128.3	41.3	 16
690	  2	63.3	11.9	 16
691	  2	345.5	58.9	 16
692	  2	548.5	91.3	 16
693	  2	79.3	15.9	 16
694	  2	79.0	11.5	 16
695	  2	82.3	10.9	 16
696	  2	69.0	12.1	 16
697	  2	71.5	12.8	 16
698	  2	72.5	17.9	 16
699	  2	59.5	8.0	 16
700	  2	65.8	9.4	 16
701	  2	74.0	19.5	 16
702	  2	278.0	28.0	 16
703	  2	252.8	30.4	 16
704	  2	225.3	31.9	 16
705	  2	173.3	18.5	 16
706	  2	60.0	10.7	 16
707	  2	49.5	8.2	 16
708	  2	98.5	17.5	 16
709	  2	6345.0	627.0	 16
710	  2	171.5	42.3	 16
711	  2	7080.5	637.8	 16
  0	  3	7231.8	1159.7	 16
  1	  3	125.3	18.5	 16
  2	  3	6462.8	1147.0	 16
  3	  3	105.5	19.1	 16
  4	  3	62.3	11.6	 16
  5	  3	146.8	16.0	 16
  6	  3	81.5	13.4	 16
  7	  3	208.0	31.9	 16
  8	  3	72.3	15.3	 16
  9	  3	224.3	52.5	 16
 10	  3	182.3	39.2	 16
 11	  3	421.0	91.3	 16
 12	  3	128.0	30.3	 16
 13	  3	155.3	20.1	 16
 14	  3	148.8	27.4	 16
 15	  3	149.3	23.6	 16
 16	  3	336.8	40.8	 16
 17	  3	465.0	36.2	 16
 18	  3	542.8	64.4	 16
 19	  3	212.3	34.9	 16
 20	  3	114.3	15.8	 16
 21	  3	89.0	16.0	 16
 22	  3	152.8	16.1	 16
 23	  3	1952.3	342.5	 16
 24	  3	91.5	16.7	 16
 25	  3	152.5	19.4	 16
 26	  3	152.0	28.0	 16
 27	  3	127.5	23.1	 16
 28	  3	128.0	24.2	 16
 29	  3	139.5	20.9	 16
 30	  3	115.8	19.6	 16
 31	  3	157.0	27.2	 16
 32	  3	99.3	11.6	 16
 33	  3	321.0	88.3	 16
 34	  3	156.3	22.9	 16
 35	  3	150.8	20.5	 16
 36	  3	256.5	26.7	 16
 37	  3	753.0	125.8	 16
 38	  3	152.0	20.1	 16
 39	  3	86.0	11.8	 16
 40	  3	160.8	21.1	 16
 41	  3	678.3	56.7	 16
 42	  3	562.3	91.8	 16
 43	  3	116.0	18.2	 16
 44	  3	214.0	22.7	 16
 45	  3	90.8	26.0	 16
 46	  3	128.0	16.8	 16
 47	  3	515.8	87.9	 16
 48	  3	71.5	11.2	 16
 49	  3	87.8	16.7	 16
 50	  3	114.8	15.2	 16
 51	  3	183.5	33.4	 16
 52	  3	492.3	104.5	 16
 53	  3	98.8	18.4	 16
 54	  3	98.5	15.4	 16
 55	  3	166.0	27.7	 16
 56	  3	337.0	34.1	 16
 57	  3	343.3	80.0	 16
 58	  3	115.3	14.7	 16
 59	  3	215.3	27.5	 16
 60	  3	101.8	18.8	 16
 61	  3	191.8	14.4	 16
 62	  3	585.3	112.9	 16
 63	  3	144.0	24.1	 16
 64	  3	3847.8	717.9	 16
 65	  3	170.0	25.6	 16
 66	  3	126.0	20.6	 16
 67	  3	215.3	22.8	 16
 68	  3	89.5	12.7	 16
 69	  3	100.8	14.0	 16
 70	  3	247.3	39.0	 20
 71	  3	179.0	23.3	 16
 72	  3	153.5	41.2	 16
 73	  3	641.5	114.9	 16
 74	  3	159.0	26.3	 16
 75	  3	86.5	14.8	 16
 76	  3	67.3	14.4	 16
 77	  3	122.0	17.0	 16
 78	  3	191.8	40.0	 16
 79	  3	186.5	46.4	 16
 80	  3	91.8	16.1	 16
 81	  3	109.8	20.7	 16
 82	  3	91.3	21.5	 16
 83	  3	661.3	86.7	 16
 84	  3	279.3	49.2	 16
 85	  3	140.3	23.5	 16
 86	  3	90.0	12.6	 16
 87	  3	150.8	19.7	 16
 88	  3	370.3	42.9	 16
 89	  3	262.8	27.4	 16
 90	  3	139.5	16.6	 16
 91	  3	758.5	125.7	 16
 92	  3	803.0	112.7	 16
 93	  3	767.3	146.3	 16
 94	  3	668.0	117.3	 16
 95	  3	635.0	105.5	 16
 96	  3	383.0	67.9	 16
 97	  3	385.8	53.1	 16
 98	  3	217.5	44.7	 16
 99	  3	99.3	31.3	 16
100	  3	143.5	29.0	 16
101	  3	252.3	34.2	 16
102	  3	79.3	9.4	 16
103	  3	503.5	99.5	 16
104	  3	180.0	36.1	 16
105	  3	102.3	16.1	 16
106	  3	92.0	15.9	 16
107	  3	284.0	45.5	 16
108	  3	110.5	21.6	 16
109	  3	169.5	23.5	 16
110	  3	146.3	19.9	 16
111	  3	182.8	18.6	 16
112	  3	147.3	22.4	 16
113	  3	432.0	66.0	 16
114	  3	160.3	23.5	 16
115	  3	134.8	19.6	 16
116	  3	166.8	21.1	 16
117	  3	148.3	25.0	 16
118	  3	203.5	28.3	 16
119	  3	332.3	39.7	 16
120	  3	139.0	27.1	 16
121	  3	362.3	55.9	 16
122	  3	92.3	19.2	 16
123	  3	66.0	12.7	 16
124	  3	73.8	22.2	 16
125	  3	87.3	16.2	 16
126	  3	134.3	13.3	 16
127	  3	92.3	17.1	 16
128	  3	95.8	41.1	 16
129	  3	87.0	22.2	 16
130	  3	384.3	62.9	 16
131	  3	271.3	29.1	 16
132	  3	461.8	66.7	 16
133	  3	181.3	17.1	 16
134	  3	266.0	34.6	 16
135	  3	364.8	45.6	 16
136	  3	1829.0	242.1	 16
137	  3	125.8	27.5	 16
138	  3	420.5	48.8	 16
139	  3	1303.0	182.2	 16
140	  3	126.8	25.1	 16
141	  3	105.3	13.4	 16
142	  3	1140.3	180.5	 16
143	  3	368.5	64.9	 16
144	  3	80.0	16.7	 16
145	  3	88.3	17.5	 16
146	  3	4205.8	819.8	 16
147	  3	664.8	96.1	 16
148	  3	201.0	22.2	 16
149	  3	156.3	22.9	 16
150	  3	99.5	11.8	 16
151	  3	321.3	82.6	 16
152	  3	416.0	82.0	 16
153	  3	181.3	29.7	 16
154	  3	83.3	15.2	 16
155	  3	1397.8	172.2	 16
156	  3	107.3	11.2	 16
157	  3	133.3	27.3	 16
158	  3	115.5	22.7	 16
159	  3	276.0	41.1	 16
160	  3	187.3	21.1	 16
161	  3	403.5	44.0	 16
162	  3	4733.5	610.4	 16
163	  3	590.8	69.8	 16
164	  3	278.8	49.0	 16
165	  3	273.5	27.0	 16
166	  3	139.5	29.1	 16
167	  3	184.5	28.7	 16
168	  3	776.0	137.2	 16
169	  3	91.8	13.9	 16
170	  3	105.8	92.6	 16
171	  3	61.3	8.6	 16
172	  3	184.0	27.2	 16
173	  3	65.3	10.2	 16
174	  3	120.5	27.5	 16
175	  3	64.5	11.0	 16
176	  3	2137.3	447.9	 16
177	  3	78.0	19.3	 16
178	  3	66.5	12.5	 16
179	  3	175.0	22.1	 16
180	  3	234.8	34.8	 16
181	  3	75.3	28.8	 16
182	  3	88.8	12.7	 16
183	  3	110.0	19.5	 16
184	  3	143.0	21.5	 16
185	  3	131.8	17.6	 16
186	  3	69.3	12.5	 16
187	  3	66.5	11.0	 16
188	  3	76.5	11.9	 16
189	  3	154.0	33.3	 20
190	  3	143.3	17.3	 16
191	  3	227.5	39.1	 16
192	  3	569.0	138.1	 16
193	  3	227.8	38.5	 16
194	  3	275.8	41.3	 16
195	  3	731.5	205.6	 16
196	  3	164.5	18.1	 16
197	  3	163.3	26.4	 16
198	  3	132.3	23.1	 16
199	  3	169.3	30.0	 16
200	  3	144.3	14.0	 16
201	  3	432.3	104.4	 16
202	  3	2012.0	379.5	 16
203	  3	89.8	16.0	 16
204	  3	111.8	24.2	 16
205	  3	83.5	12.9	 16
206	  3	88.3	18.4	 16
207	  3	340.8	79.7	 16
208	  3	66.0	15.3	 16
209	  3	112.3	22.1	 16
210	  3	68.3	11.3	 16
211	  3	73.0	13.7	 16
212	  3	106.3	14.1	 16
213	  3	88.0	11.3	 16
214	  3	83.8	23.8	 16
215	  3	253.3	55.3	 16
216	  3	77.3	14.5	 16
217	  3	202.5	36.3	 16
218	  3	116.0	11.3	 16
219	  3	167.5	32.1	 16
220	  3	217.0	39.5	 16
221	  3	316.3	68.5	 16
222	  3	75.0	15.0	 16
223	  3	207.5	44.1	 16
224	  3	63.3	10.1	 16
225	  3	98.5	13.8	 16
226	  3	243.5	35.0	 16
227	  3	106.0	30.0	 16
228	  3	82.5	11.1	 16
229	  3	100.3	15.4	 16
230	  3	1004.8	197.9	 16
231	  3	371.5	70.8	 16
232	  3	79.8	12.2	 16
233	  3	367.8	92.6	 16
234	  3	84.3	15.4	 16
235	  3	47.3	8.8	 16
236	  3	48.5	11.3	 16
237	  3	50.5	9.6	 16
238	  3	58.3	9.2	 16
239	  3	66.3	9.7	 16
240	  3	133.0	20.0	 16
241	  3	153.3	26.0	 16
242	  3	91.3	11.2	 16
243	  3	371.0	58.5	 16
244	  3	114.0	20.4	 16
245	  3	92.5	26.6	 16
246	  3	193.8	29.9	 16
247	  3	103.0	16.0	 16
248	  3	70.3	12.4	 16
249	  3	84.3	12.3	 16
250	  3	151.3	22.4	 16
251	  3	119.8	19.4	 16
252	  3	222.3	33.6	 16
253	  3	91.0	20.6	 16
254	  3	87.8	14.1	 16
255	  3	475.0	63.2	 16
256	  3	151.0	18.2	 16
257	  3	117.3	18.0	 16
258	  3	483.3	97.6	 16
259	  3	218.3	37.9	 16
260	  3	70.5	10.7	 16
261	  3	65.3	7.4	 16
262	  3	73.0	15.4	 16
263	  3	132.0	13.2	 16
264	  3	394.5	46.6	 16
265	  3	315.8	90.8	 16
266	  3	255.5	40.2	 16
267	  3	155.3	22.6	 16
268	  3	95.0	13.6	 16
269	  3	376.0	65.9	 16
270	  3	561.8	142.7	 16
271	  3	150.8	25.8	 16
272	  3	106.5	16.5	 16
273	  3	572.3	36.8	 16
274	  3	880.3	101.8	 16
275	  3	209.5	22.3	 16
276	  3	165.8	25.5	 16
277	  3	230.3	33.1	 16
278	  3	166.5	20.9	 16
279	  3	140.3	16.9	 16
280	  3	142.3	18.0	 16
281	  3	78.8	11.0	 16
282	  3	423.5	68.8	 16
283	  3	187.0	49.7	 16
284	  3	140.5	26.2	 16
285	  3	229.8	21.4	 16
286	  3	117.0	19.6	 16
287	  3	111.0	19.8	 16
288	  3	189.0	26.9	 16
289	  3	93.3	18.9	 16
290	  3	129.5	17.7	 16
291	  3	74.5	10.0	 16
292	  3	217.0	35.1	 16
293	  3	1487.5	283.1	 16
294	  3	236.0	34.3	 16
295	  3	121.3	18.0	 16
296	  3	252.5	65.4	 16
297	  3	1935.0	282.3	 16
298	  3	691.8	77.5	 16
299	  3	656.3	58.9	 16
300	  3	335.0	34.2	 16
301	  3	100.0	12.8	 16
302	  3	137.8	19.6	 16
303	  3	93.5	16.5	 16
304	  3	237.5	26.1	 16
305	  3	86.3	13.8	 16
306	  3	69.8	8.8	 16
307	  3	127.3	32.1	 16
308	  3	98.5	21.2	 20
309	  3	4175.0	639.4	 16
310	  3	3764.0	1055.1	 16
311	  3	195.3	24.2	 16
312	  3	350.8	41.0	 16
313	  3	310.3	30.8	 16
314	  3	141.5	23.0	 16
315	  3	1080.0	291.7	 16
316	  3	1625.8	512.6	 16
317	  3	499.0	155.4	 16
318	  3	205.0	57.4	 16
319	  3	80.3	9.9	 16
320	  3	269.0	43.4	 16
321	  3	209.3	33.1	 16
322	  3	113.3	12.0	 16
323	  3	258.5	48.4	 16
324	  3	181.0	28.3	 16
325	  3	111.3	17.8	 16
326	  3	1075.8	262.5	 16
327	  3	66.8	12.5	 16
328	  3	144.3	21.3	 16
329	  3	1306.5	231.5	 16
330	  3	75.3	12.3	 16
331	  3	82.5	13.5	 16
332	  3	71.5	15.1	 16
333	  3	89.0	12.2	 16
334	  3	88.3	12.4	 16
335	  3	63.0	11.2	 16
336	  3	70.0	13.1	 16
337	  3	80.3	8.7	 16
338	  3	74.8	13.9	 16
339	  3	79.3	18.8	 16
340	  3	100.0	20.2	 16
341	  3	3288.5	746.4	 16
342	  3	127.0	17.0	 16
343	  3	150.3	18.3	 16
344	  3	176.3	23.3	 16
345	  3	191.5	25.5	 16
346	  3	148.5	21.8	 16
347	  3	130.3	16.7	 16
348	  3	1336.0	149.3	 16
349	  3	434.5	65.0	 16
350	  3	95.0	31.4	 16
351	  3	86.3	14.4	 16
352	  3	83.3	12.4	 16
353	  3	73.5	10.6	 16
354	  3	151.3	17.4	 16
355	  3	117.0	28.3	 16
356	  3	88.0	13.2	 16
357	  3	166.0	31.5	 16
358	  3	77.0	17.1	 16
359	  3	119.0	22.4	 16
360	  3	91.8	17.7	 16
361	  3	2224.8	475.3	 16
362	  3	2253.0	436.2	 16
363	  3	1911.0	477.9	 16
364	  3	200.8	24.1	 16
365	  3	189.3	33.1	 16
366	  3	73.3	11.6	 16
367	  3	85.0	27.2	 16
368	  3	147.0	23.6	 16
369	  3	115.5	17.0	 16
370	  3	112.3	20.8	 16
371	  3	708.0	79.5	 16
372	  3	125.5	20.3	 16
373	  3	1253.3	172.3	 16
374	  3	110.0	15.7	 16
375	  3	108.8	21.6	 16
376	  3	243.3	42.8	 16
377	  3	93.0	15.5	 16
378	  3	107.8	17.8	 16
379	  3	132.5	19.5	 16
380	  3	148.0	14.8	 16
381	  3	1329.5	154.0	 16
382	  3	451.5	61.6	 16
383	  3	576.3	90.1	 16
384	  3	85.0	16.2	 16
385	  3	69.5	13.0	 16
386	  3	62.0	12.8	 16
387	  3	199.0	21.3	 16
388	  3	102.3	15.0	 16
389	  3	331.0	76.2	 16
390	  3	202.0	36.8	 16
391	  3	84.0	88.8	 16
392	  3	265.8	30.3	 16
393	  3	97.3	12.9	 16
394	  3	378.0	72.8	 16
395	  3	129.0	22.2	 16
396	  3	1191.3	101.7	 16
397	  3	97.0	17.9	 16
398	  3	78.3	11.8	 16
399	  3	94.3	14.9	 16
400	  3	939.3	163.3	 16
401	  3	361.3	40.2	 16
402	  3	483.0	69.0	 16
403	  3	81.5	14.0	 16
404	  3	87.8	11.7	 16
405	  3	269.5	43.2	 16
406	  3	146.5	20.1	 16
407	  3	129.3	25.2	 16
408	  3	110.5	16.6	 16
409	  3	122.0	18.1	 16
410	  3	172.0	34.7	 16
411	  3	785.0	156.1	 16
412	  3	231.0	20.2	 16
413	  3	1439.5	358.9	 16
414	  3	98.3	16.2	 16
415	  3	92.0	13.2	 16
416	  3	170.0	18.9	 16
417	  3	131.5	19.5	 16
418	  3	151.5	19.9	 16
419	  3	110.8	19.2	 16
420	  3	72.0	9.5	 16
421	  3	1136.5	172.0	 16
422	  3	602.3	73.8	 16
423	  3	124.3	19.6	 16
424	  3	94.0	18.6	 16
425	  3	1584.8	245.5	 16
426	  3	68.5	12.1	 16
427	  3	92.3	13.5	 20
428	  3	77.5	13.9	 16
429	  3	880.5	209.8	 16
430	  3	272.8	47.3	 16
431	  3	86.0	19.3	 16
432	  3	137.8	26.2	 16
433	  3	1589.5	440.3	 16
434	  3	165.5	36.2	 16
435	  3	246.0	63.3	 16
436	  3	105.8	24.6	 16
437	  3	64.8	9.3	 16
438	  3	78.0	10.6	 16
439	  3	156.5	24.0	 16
440	  3	102.5	16.5	 16
441	  3	297.5	59.0	 16
442	  3	943.0	214.6	 16
443	  3	640.5	108.7	 16
444	  3	118.0	16.8	 16
445	  3	92.5	16.1	 16
446	  3	73.0	10.8	 16
447	  3	61.8	10.4	 16
448	  3	250.0	48.8	 16
449	  3	91.3	13.2	 16
450	  3	562.5	118.8	 16
451	  3	63.8	8.9	 16
452	  3	726.8	169.0	 16
453	  3	798.3	53.8	 16
454	  3	1532.8	234.1	 16
455	  3	444.3	54.8	 16
456	  3	695.3	67.8	 16
457	  3	157.8	24.3	 16
458	  3	106.3	29.5	 16
459	  3	256.5	62.1	 16
460	  3	435.5	79.3	 16
461	  3	709.0	126.0	 16
462	  3	113.0	16.5	 16
463	  3	64.3	9.4	 16
464	  3	1495.3	90.7	 16
465	  3	4893.5	197.0	 16
466	  3	4346.8	234.1	 16
467	  3	3605.8	569.4	 16
468	  3	146.5	24.6	 16
469	  3	187.3	33.6	 16
470	  3	812.0	138.9	 16
471	  3	75.8	14.9	 16
472	  3	40.3	6.6	 16
473	  3	47.3	9.5	 16
474	  3	50.0	8.8	 16
475	  3	44.0	4.9	 16
476	  3	47.5	6.0	 16
477	  3	209.0	23.5	 16
478	  3	232.3	43.5	 16
479	  3	112.3	16.3	 16
480	  3	97.0	19.7	 16
481	  3	80.3	13.5	 16
482	  3	146.8	19.6	 16
483	  3	320.3	62.1	 16
484	  3	147.3	25.4	 16
485	  3	206.3	28.8	 16
486	  3	117.3	22.5	 16
487	  3	100.3	14.1	 16
488	  3	136.3	22.5	 16
489	  3	69.3	11.9	 16
490	  3	71.8	18.0	 16
491	  3	340.3	62.0	 16
492	  3	119.0	19.6	 16
493	  3	120.5	18.4	 16
494	  3	88.3	18.6	 16
495	  3	1083.3	184.2	 16
496	  3	501.8	69.0	 16
497	  3	254.3	32.6	 16
498	  3	91.5	14.7	 16
499	  3	92.3	18.2	 16
500	  3	273.0	40.5	 16
501	  3	153.0	24.0	 16
502	  3	695.0	55.5	 16
503	  3	60.0	9.4	 16
504	  3	67.3	10.3	 16
505	  3	5030.3	888.3	 16
506	  3	274.8	40.5	 16
507	  3	309.8	36.8	 16
508	  3	121.0	18.4	 16
509	  3	152.3	21.9	 16
510	  3	322.8	43.5	 16
511	  3	168.5	28.9	 16
512	  3	1127.3	127.7	 16
513	  3	74.8	10.5	 16
514	  3	66.0	7.4	 16
515	  3	67.3	13.1	 16
516	  3	493.5	40.8	 16
517	  3	317.0	51.2	 16
518	  3	116.3	21.5	 16
519	  3	300.0	43.7	 16
520	  3	88.0	12.4	 16
521	  3	133.5	17.5	 16
522	  3	439.8	76.8	 16
523	  3	326.8	41.1	 16
524	  3	843.3	167.7	 16
525	  3	77.0	13.5	 16
526	  3	91.3	13.1	 16
527	  3	166.3	32.3	 16
528	  3	83.3	10.8	 16
529	  3	120.5	21.7	 16
530	  3	86.0	10.4	 16
531	  3	82.0	14.1	 16
532	  3	160.5	30.2	 16
533	  3	96.3	15.3	 16
534	  3	429.3	48.8	 16
535	  3	241.3	31.6	 16
536	  3	232.5	25.4	 16
537	  3	164.3	14.3	 16
538	  3	98.8	22.7	 16
539	  3	687.5	74.3	 16
540	  3	69.0	12.8	 16
541	  3	231.3	39.8	 16
542	  3	246.5	37.4	 16
543	  3	239.8	36.1	 16
544	  3	628.5	65.1	 16
545	  3	722.0	124.8	 20
546	  3	176.8	30.4	 16
547	  3	188.5	38.2	 16
548	  3	665.5	106.4	 16
549	  3	134.0	25.3	 16
550	  3	98.5	13.7	 16
551	  3	197.0	39.6	 16
552	  3	911.8	230.1	 16
553	  3	92.5	14.2	 16
554	  3	2569.8	601.0	 16
555	  3	72.0	11.7	 16
556	  3	217.0	33.8	 16
557	  3	168.0	34.0	 16
558	  3	1115.5	177.0	 16
559	  3	238.3	27.5	 16
560	  3	2099.0	194.8	 16
561	  3	796.3	66.2	 16
562	  3	374.0	37.1	 16
563	  3	185.3	24.2	 16
564	  3	605.0	70.1	 16
565	  3	217.8	19.0	 16
566	  3	1046.5	133.3	 16
567	  3	65.5	15.7	 16
568	  3	126.3	15.2	 16
569	  3	222.3	37.1	 16
570	  3	76.3	12.2	 16
571	  3	61.8	14.9	 16
572	  3	840.8	174.3	 16
573	  3	102.0	17.6	 16
574	  3	107.0	13.3	 16
575	  3	255.0	42.7	 16
576	  3	330.3	41.4	 16
577	  3	528.3	87.6	 16
578	  3	76.0	12.2	 16
579	  3	108.0	23.6	 16
580	  3	115.3	22.2	 16
581	  3	137.5	16.7	 16
582	  3	100.5	18.0	 16
583	  3	341.8	971.5	 16
584	  3	300.0	25.2	 16
585	  3	150.3	17.6	 16
586	  3	187.0	17.3	 16
587	  3	170.0	20.7	 16
588	  3	131.0	15.9	 16
589	  3	168.0	29.9	 16
590	  3	229.3	29.4	 16
591	  3	116.3	14.9	 16
592	  3	260.8	37.9	 16
593	  3	611.3	79.4	 16
594	  3	76.5	9.9	 16
595	  3	337.3	49.8	 16
596	  3	303.3	53.6	 16
597	  3	204.8	34.3	 16
598	  3	151.5	16.6	 16
599	  3	225.8	31.4	 16
600	  3	372.5	36.0	 16
601	  3	307.5	30.8	 16
602	  3	434.0	46.4	 16
603	  3	592.0	59.0	 16
604	  3	216.0	49.5	 16
605	  3	597.8	58.9	 16
606	  3	101.0	12.0	 16
607	  3	316.0	35.6	 16
608	  3	306.0	38.5	 16
609	  3	250.5	23.1	 16
610	  3	482.3	56.5	 16
611	  3	281.3	38.1	 16
612	  3	230.8	48.5	 16
613	  3	72.8	13.8	 16
614	  3	323.0	49.3	 16
615	  3	76.5	14.3	 16
616	  3	156.5	23.2	 16
617	  3	196.3	32.5	 16
618	  3	128.0	18.0	 16
619	  3	110.0	11.1	 16
620	  3	2350.3	353.3	 16
621	  3	225.8	46.8	 16
622	  3	71.0	14.9	 16
623	  3	79.0	16.7	 16
624	  3	71.3	12.9	 16
625	  3	128.5	22.3	 16
626	  3	160.0	22.9	 16
627	  3	1525.5	356.5	 16
628	  3	603.8	73.9	 16
629	  3	353.0	31.2	 16
630	  3	126.5	18.4	 16
631	  3	990.3	106.4	 16
632	  3	78.3	9.2	 16
633	  3	146.3	21.9	 16
634	  3	169.3	21.5	 16
635	  3	155.8	24.9	 16
636	  3	195.8	29.3	 16
637	  3	953.8	150.9	 16
638	  3	76.5	67.6	 16
639	  3	495.3	60.2	 16
640	  3	612.3	88.0	 16
641	  3	73.5	9.7	 16
642	  3	87.3	16.8	 16
643	  3	91.3	16.8	 16
644	  3	179.3	26.8	 16
645	  3	512.3	67.3	 16
646	  3	2593.5	457.6	 16
647	  3	65.3	9.5	 16
648	  3	152.5	30.7	 16
649	  3	94.5	20.9	 16
650	  3	55.8	5.3	 16
651	  3	101.0	22.0	 16
652	  3	72.0	15.3	 16
653	  3	80.8	16.2	 16
654	  3	68.5	12.8	 16
655	  3	143.0	26.4	 16
656	  3	133.8	21.0	 16
657	  3	69.8	13.5	 16
658	  3	65.0	11.2	 16
659	  3	70.5	14.8	 16
660	  3	262.0	51.4	 16
661	  3	525.3	81.5	 16
662	  3	295.8	39.5	 16
663	  3	541.3	52.9	 16
664	  3	132.5	21.2	 20
665	  3	196.0	35.2	 16
666	  3	818.0	146.2	 16
667	  3	97.3	17.9	 16
668	  3	177.5	27.2	 16
669	  3	116.0	15.9	 16
670	  3	85.5	15.3	 16
671	  3	687.3	126.6	 16
672	  3	172.0	35.7	 16
673	  3	1187.5	209.6	 16
674	  3	211.8	33.8	 16
675	  3	190.3	28.1	 16
676	  3	222.3	29.3	 16
677	  3	199.0	30.8	 16
678	  3	51.3	11.7	 16
679	  3	69.8	10.8	 16
680	  3	92.3	18.9	 16
681	  3	71.0	14.6	 16
682	  3	242.0	44.3	 16
683	  3	87.5	14.0	 16
684	  3	95.0	18.1	 16
685	  3	174.0	16.9	 16
686	  3	360.0	35.6	 16
687	  3	97.5	12.6	 16
688	  3	95.5	10.5	 16
689	  3	204.8	43.8	 16
690	  3	1487.3	292.9	 16
691	  3	169.3	17.9	 16
692	  3	548.3	75.9	 16
693	  3	110.3	15.4	 16
694	  3	184.0	21.3	 16
695	  3	233.8	27.1	 16
696	  3	810.0	180.4	 16
697	  3	96.3	16.1	 16
698	  3	169.3	34.2	 16
699	  3	235.8	41.7	 16
700	  3	1322.0	205.8	 16
701	  3	526.5	76.7	 16
702	  3	178.5	29.2	 16
703	  3	345.3	42.8	 16
704	  3	283.0	29.9	 16
705	  3	948.3	104.2	 16
706	  3	92.8	20.0	 16
707	  3	54.5	7.7	 16
708	  3	7205.0	953.8	 16
709	  3	116.0	57.3	 16
710	  3	6825.5	778.7	 16
711	  3	91.3	16.8	 16
  0	  4	71.8	13.8	 16
  1	  4	57.3	11.6	 16
  2	  4	87.0	27.3	 16
  3	  4	58.8	11.9	 16
  4	  4	60.3	12.2	 16
  5	  4	124.8	20.1	 16
  6	  4	74.5	12.1	 16
  7	  4	196.5	29.8	 16
  8	  4	72.0	13.6	 16
  9	  4	113.0	21.0	 16
 10	  4	79.0	14.7	 16
 11	  4	188.5	32.0	 16
 12	  4	89.0	12.0	 16
 13	  4	145.8	14.9	 16
 14	  4	118.3	21.0	 16
 15	  4	199.0	30.7	 16
 16	  4	189.5	25.1	 16
 17	  4	1634.3	94.0	 16
 18	  4	613.3	54.9	 16
 19	  4	526.5	54.5	 16
 20	  4	92.5	16.9	 16
 21	  4	73.0	11.3	 16
 22	  4	188.3	22.0	 16
 23	  4	336.5	31.1	 16
 24	  4	97.8	15.3	 16
 25	  4	158.5	14.5	 16
 26	  4	122.5	13.5	 16
 27	  4	124.3	15.9	 16
 28	  4	122.3	12.1	 16
 29	  4	142.3	21.7	 16
 30	  4	135.3	15.4	 16
 31	  4	195.5	34.4	 16
 32	  4	99.0	16.9	 16
 33	  4	149.8	18.1	 16
 34	  4	140.8	21.3	 16
 35	  4	265.5	25.3	 16
 36	  4	166.8	22.5	 16
 37	  4	158.5	28.3	 16
 38	  4	147.0	18.0	 16
 39	  4	94.8	16.8	 16
 40	  4	109.8	17.5	 16
 41	  4	140.3	18.0	 16
 42	  4	134.8	27.1	 16
 43	  4	124.5	17.4	 16
 44	  4	116.3	9.9	 16
 45	  4	78.5	15.9	 16
 46	  4	146.8	19.6	 16
 47	  4	216.5	24.0	 16
 48	  4	84.0	15.6	 16
 49	  4	76.3	10.7	 16
 50	  4	153.0	19.8	 16
 51	  4	181.0	29.8	 16
 52	  4	173.3	31.5	 16
 53	  4	96.5	15.3	 16
 54	  4	111.3	18.1	 16
 55	  4	198.3	32.5	 16
 56	  4	258.0	43.4	 16
 57	  4	170.3	28.9	 16
 58	  4	112.5	14.4	 16
 59	  4	128.5	12.8	 16
 60	  4	88.0	9.9	 16
 61	  4	185.3	29.1	 16
 62	  4	118.3	18.0	 16
 63	  4	318.3	30.7	 16
 64	  4	1258.0	135.1	 16
 65	  4	137.3	21.7	 16
 66	  4	125.3	24.3	 16
 67	  4	204.5	24.0	 16
 68	  4	104.3	13.5	 16
 69	  4	104.0	10.9	 16
 70	  4	220.0	28.7	 16
 71	  4	114.0	17.3	 16
 72	  4	119.8	21.5	 16
 73	  4	271.8	23.9	 16
 74	  4	131.3	19.9	 20
 75	  4	104.8	15.6	 16
 76	  4	79.0	15.5	 16
 77	  4	105.3	15.2	 16
 78	  4	146.3	19.7	 16
 79	  4	117.8	27.1	 16
 80	  4	91.8	12.3	 16
 81	  4	88.5	14.2	 16
 82	  4	91.0	14.5	 16
 83	  4	366.0	48.5	 16
 84	  4	241.3	28.1	 16
 85	  4	112.5	19.8	 16
 86	  4	136.8	24.1	 16
 87	  4	341.3	35.0	 16
 88	  4	641.0	53.5	 16
 89	  4	341.0	42.9	 16
 90	  4	204.8	31.1	 16
 91	  4	331.0	29.6	 16
 92	  4	318.3	52.4	 16
 93	  4	315.5	37.4	 16
 94	  4	327.8	29.6	 16
 95	  4	253.8	39.9	 16
 96	  4	141.3	20.0	 16
 97	  4	355.3	45.6	 16
 98	  4	125.0	21.0	 16
 99	  4	102.5	14.4	 16
100	  4	190.5	26.7	 16
101	  4	337.8	41.9	 16
102	  4	85.3	36.5	 16
103	  4	174.3	28.5	 16
104	  4	188.3	29.0	 16
105	  4	140.0	22.5	 16
106	  4	81.3	17.4	 16
107	  4	205.5	27.5	 16
108	  4	90.5	15.4	 16
109	  4	172.5	21.3	 16
110	  4	75.3	10.8	 16
111	  4	98.3	21.8	 16
112	  4	195.5	28.5	 16
113	  4	144.5	22.5	 16
114	  4	138.8	14.5	 16
115	  4	93.3	10.6	 16
116	  4	100.8	17.4	 16
117	  4	132.5	43.4	 16
118	  4	105.5	13.6	 16
119	  4	277.5	36.5	 16
120	  4	252.5	36.2	 16
121	  4	217.5	42.2	 16
122	  4	108.8	22.9	 16
123	  4	69.8	13.9	 16
124	  4	77.0	10.9	 16
125	  4	80.5	14.7	 16
126	  4	119.0	19.8	 16
127	  4	88.5	16.8	 16
128	  4	83.3	15.6	 16
129	  4	68.8	11.1	 16
130	  4	119.0	32.5	 16
131	  4	784.8	84.1	 16
132	  4	337.8	46.0	 16
133	  4	113.0	20.3	 16
134	  4	251.8	22.2	 16
135	  4	193.0	25.3	 16
136	  4	594.0	73.8	 16
137	  4	77.0	17.1	 16
138	  4	158.0	41.4	 16
139	  4	382.8	49.6	 16
140	  4	92.8	15.5	 16
141	  4	100.3	21.3	 16
142	  4	398.0	59.2	 16
143	  4	235.5	30.2	 16
144	  4	62.0	11.4	 16
145	  4	74.3	27.1	 16
146	  4	1247.3	168.6	 16
147	  4	167.8	35.9	 16
148	  4	112.8	18.1	 16
149	  4	107.0	16.9	 16
150	  4	97.0	11.7	 16
151	  4	143.3	27.1	 16
152	  4	151.5	26.3	 16
153	  4	129.3	26.8	 16
154	  4	75.3	13.2	 16
155	  4	139.3	20.5	 16
156	  4	68.8	11.8	 16
157	  4	81.8	11.4	 16
158	  4	102.0	15.1	 16
159	  4	103.0	26.6	 16
160	  4	363.0	38.9	 16
161	  4	315.5	43.0	 16
162	  4	824.0	154.7	 16
163	  4	91.0	12.4	 16
164	  4	194.3	31.5	 16
165	  4	197.3	23.9	 16
166	  4	99.3	11.8	 16
167	  4	152.0	19.5	 16
168	  4	89.5	14.4	 16
169	  4	71.3	15.6	 16
170	  4	116.8	24.7	 16
171	  4	58.8	10.9	 16
172	  4	88.3	12.8	 16
173	  4	75.3	14.7	 16
174	  4	87.0	20.8	 16
175	  4	59.8	9.7	 16
176	  4	201.3	91.3	 16
177	  4	77.5	17.6	 16
178	  4	84.3	32.3	 16
179	  4	294.0	48.7	 16
180	  4	412.5	41.7	 16
181	  4	75.5	16.2	 16
182	  4	68.0	8.0	 16
183	  4	178.3	28.3	 16
184	  4	85.3	13.6	 16
185	  4	83.8	13.0	 16
186	  4	71.3	11.6	 16
187	  4	69.3	11.6	 16
188	  4	66.3	14.7	 16
189	  4	120.3	98.4	 16
190	  4	98.8	21.9	 16
191	  4	201.0	22.4	 16
192	  4	225.3	40.4	 20
193	  4	127.8	16.4	 16
194	  4	149.3	34.4	 16
195	  4	145.5	28.8	 16
196	  4	201.0	28.6	 16
197	  4	287.0	33.4	 16
198	  4	182.5	30.5	 16
199	  4	269.5	30.4	 16
200	  4	115.3	17.0	 16
201	  4	81.0	12.3	 16
202	  4	127.5	27.2	 16
203	  4	82.8	10.5	 16
204	  4	78.5	12.4	 16
205	  4	121.5	21.9	 16
206	  4	136.5	22.0	 16
207	  4	95.0	17.4	 16
208	  4	72.5	11.6	 16
209	  4	83.0	16.8	 16
210	  4	79.0	19.9	 16
211	  4	73.8	16.5	 16
212	  4	70.5	11.3	 16
213	  4	111.3	14.7	 16
214	  4	97.8	116.7	 16
215	  4	109.3	18.7	 16
216	  4	82.5	18.4	 16
217	  4	208.5	33.0	 16
218	  4	158.8	31.0	 16
219	  4	150.0	20.8	 16
220	  4	112.5	18.9	 16
221	  4	147.0	56.4	 16
222	  4	92.5	16.0	 16
223	  4	74.5	15.2	 16
224	  4	66.3	13.0	 16
225	  4	74.3	15.2	 16
226	  4	120.3	12.9	 16
227	  4	92.5	12.6	 16
228	  4	101.0	17.0	 16
229	  4	84.3	12.6	 16
230	  4	71.5	9.3	 16
231	  4	75.3	11.1	 16
232	  4	67.0	11.0	 16
233	  4	84.3	15.4	 16
234	  4	62.0	13.7	 16
235	  4	43.3	8.6	 16
236	  4	53.0	11.2	 16
237	  4	51.5	9.8	 16
238	  4	53.8	10.2	 16
239	  4	68.8	15.1	 16
240	  4	138.0	30.6	 16
241	  4	135.5	21.5	 16
242	  4	114.3	17.1	 16
243	  4	379.3	33.5	 16
244	  4	114.0	25.8	 16
245	  4	102.3	20.8	 16
246	  4	289.5	203.7	 16
247	  4	170.0	23.5	 16
248	  4	73.5	11.0	 16
249	  4	93.8	18.6	 16
250	  4	78.0	14.7	 16
251	  4	92.3	17.5	 16
252	  4	100.0	20.3	 16
253	  4	83.0	16.5	 16
254	  4	110.5	73.0	 16
255	  4	111.3	19.2	 16
256	  4	90.3	14.4	 16
257	  4	92.0	16.8	 16
258	  4	126.5	25.7	 16
259	  4	62.8	9.5	 16
260	  4	55.3	5.9	 16
261	  4	69.5	16.4	 16
262	  4	54.3	13.3	 16
263	  4	104.8	15.4	 16
264	  4	278.0	35.2	 16
265	  4	90.5	18.3	 16
266	  4	172.8	24.8	 16
267	  4	110.0	16.8	 16
268	  4	70.5	9.1	 16
269	  4	116.8	31.8	 16
270	  4	200.8	46.5	 16
271	  4	89.5	22.3	 16
272	  4	263.0	39.3	 16
273	  4	1247.0	147.6	 16
274	  4	491.0	52.2	 16
275	  4	293.3	33.1	 16
276	  4	143.3	24.2	 16
277	  4	169.0	26.9	 16
278	  4	173.8	31.1	 16
279	  4	108.3	15.6	 16
280	  4	116.8	18.2	 16
281	  4	84.8	15.5	 16
282	  4	81.5	14.4	 16
283	  4	157.3	15.3	 16
284	  4	116.3	14.7	 16
285	  4	247.3	24.6	 16
286	  4	146.5	21.4	 16
287	  4	159.8	17.3	 16
288	  4	123.0	28.4	 16
289	  4	70.3	11.0	 16
290	  4	121.8	23.3	 16
291	  4	71.8	16.5	 16
292	  4	147.5	19.7	 16
293	  4	312.0	77.0	 16
294	  4	145.3	25.1	 16
295	  4	86.0	15.1	 16
296	  4	82.8	10.5	 16
297	  4	159.5	23.8	 16
298	  4	175.3	20.5	 16
299	  4	161.0	29.6	 16
300	  4	116.0	23.4	 16
301	  4	82.0	11.5	 16
302	  4	107.3	14.4	 16
303	  4	106.0	18.8	 16
304	  4	272.3	26.6	 16
305	  4	76.8	7.5	 16
306	  4	63.5	14.6	 16
307	  4	92.0	18.8	 16
308	  4	81.8	17.8	 16
309	  4	781.5	110.8	 16
310	  4	750.5	132.2	 16
311	  4	153.0	34.2	 20
312	  4	332.5	43.6	 16
313	  4	427.3	64.0	 16
314	  4	192.3	30.5	 16
315	  4	221.8	66.0	 16
316	  4	238.0	79.4	 16
317	  4	89.3	19.5	 16
318	  4	67.0	10.5	 16
319	  4	84.0	10.9	 16
320	  4	178.5	29.6	 16
321	  4	197.8	31.2	 16
322	  4	92.8	14.2	 16
323	  4	111.3	21.8	 16
324	  4	111.8	21.3	 16
325	  4	188.0	30.5	 16
326	  4	153.3	32.3	 16
327	  4	73.0	20.3	 16
328	  4	239.0	30.9	 16
329	  4	493.8	65.0	 16
330	  4	126.3	64.4	 16
331	  4	65.3	9.1	 16
332	  4	69.3	13.7	 16
333	  4	72.3	17.9	 16
334	  4	72.5	76.3	 16
335	  4	85.3	14.4	 16
336	  4	78.3	10.3	 16
337	  4	81.0	14.8	 16
338	  4	78.5	13.6	 16
339	  4	63.5	11.6	 16
340	  4	99.3	16.5	 16
341	  4	887.8	209.0	 16
342	  4	123.0	20.2	 16
343	  4	158.0	28.3	 16
344	  4	166.3	24.5	 16
345	  4	152.8	19.7	 16
346	  4	122.8	15.5	 16
347	  4	101.0	12.1	 16
348	  4	447.0	54.6	 16
349	  4	183.0	35.2	 16
350	  4	76.5	12.5	 16
351	  4	86.0	12.5	 16
352	  4	96.8	13.9	 16
353	  4	93.5	15.4	 16
354	  4	78.0	14.1	 16
355	  4	130.0	19.8	 16
356	  4	96.5	21.0	 16
357	  4	146.3	16.2	 16
358	  4	63.0	9.7	 16
359	  4	75.0	12.5	 16
360	  4	74.5	11.8	 16
361	  4	458.8	62.8	 16
362	  4	445.8	71.0	 16
363	  4	343.8	66.1	 16
364	  4	298.3	31.4	 16
365	  4	473.5	61.4	 16
366	  4	88.3	17.6	 16
367	  4	90.8	14.9	 16
368	  4	76.5	9.6	 16
369	  4	148.3	21.5	 16
370	  4	143.0	30.0	 16
371	  4	224.8	27.3	 16
372	  4	150.3	29.7	 16
373	  4	391.3	54.5	 16
374	  4	107.5	14.4	 16
375	  4	116.0	13.6	 16
376	  4	144.0	23.8	 16
377	  4	86.3	16.8	 16
378	  4	128.5	18.9	 16
379	  4	135.5	14.0	 16
380	  4	265.3	35.1	 16
381	  4	1515.5	115.9	 16
382	  4	553.8	48.6	 16
383	  4	535.3	58.5	 16
384	  4	99.0	16.7	 16
385	  4	71.5	9.8	 16
386	  4	71.5	13.9	 16
387	  4	198.0	30.3	 16
388	  4	57.5	9.7	 16
389	  4	156.3	23.2	 16
390	  4	87.0	13.1	 16
391	  4	74.3	11.9	 16
392	  4	121.0	50.1	 16
393	  4	81.8	15.0	 16
394	  4	128.0	20.8	 16
395	  4	192.0	28.2	 16
396	  4	217.5	33.8	 16
397	  4	97.3	13.3	 16
398	  4	89.3	16.4	 16
399	  4	94.0	11.7	 16
400	  4	210.3	36.8	 16
401	  4	134.5	23.6	 16
402	  4	137.0	18.4	 16
403	  4	64.0	9.7	 16
404	  4	84.3	17.0	 16
405	  4	176.3	15.8	 16
406	  4	129.0	24.3	 16
407	  4	233.3	22.7	 16
408	  4	80.5	13.9	 16
409	  4	95.5	9.9	 16
410	  4	118.5	15.2	 16
411	  4	504.5	52.7	 16
412	  4	396.3	32.8	 16
413	  4	937.0	103.8	 16
414	  4	68.8	12.6	 16
415	  4	105.0	16.2	 16
416	  4	105.8	34.0	 16
417	  4	90.3	17.3	 16
418	  4	107.5	17.6	 16
419	  4	205.5	17.4	 16
420	  4	80.3	16.7	 16
421	  4	127.8	27.2	 16
422	  4	158.0	27.1	 16
423	  4	157.8	23.4	 16
424	  4	98.0	17.2	 16
425	  4	315.8	41.3	 16
426	  4	74.8	36.0	 16
427	  4	75.0	17.9	 16
428	  4	59.5	11.8	 16
429	  4	280.3	48.7	 16
430	  4	209.5	26.6	 20
431	  4	93.5	14.5	 16
432	  4	66.3	8.0	 16
433	  4	147.8	33.1	 16
434	  4	144.3	23.2	 16
435	  4	76.8	12.7	 16
436	  4	53.0	10.0	 16
437	  4	89.5	23.4	 16
438	  4	60.3	11.6	 16
439	  4	129.8	17.4	 16
440	  4	124.5	22.0	 16
441	  4	108.8	17.3	 16
442	  4	114.0	19.5	 16
443	  4	431.0	49.6	 16
444	  4	113.3	22.2	 16
445	  4	64.0	11.4	 16
446	  4	72.0	21.8	 16
447	  4	63.3	13.8	 16
448	  4	75.3	9.5	 16
449	  4	102.8	21.8	 16
450	  4	160.3	39.8	 16
451	  4	63.5	16.9	 16
452	  4	126.5	18.2	 16
453	  4	611.8	58.8	 16
454	  4	1038.5	114.1	 16
455	  4	238.3	21.4	 16
456	  4	234.5	23.5	 16
457	  4	110.0	20.2	 16
458	  4	75.5	14.5	 16
459	  4	141.8	38.0	 16
460	  4	556.0	125.5	 16
461	  4	1233.3	124.0	 16
462	  4	77.0	10.5	 16
463	  4	70.3	13.7	 16
464	  4	407.5	41.4	 16
465	  4	729.0	74.1	 16
466	  4	543.5	89.1	 16
467	  4	368.8	69.5	 16
468	  4	161.8	23.9	 16
469	  4	80.5	13.9	 16
470	  4	454.3	74.4	 16
471	  4	66.0	10.1	 16
472	  4	44.3	9.6	 16
473	  4	39.8	7.4	 16
474	  4	47.8	11.0	 16
475	  4	52.0	6.8	 16
476	  4	54.3	10.3	 16
477	  4	133.5	15.7	 16
478	  4	98.5	14.4	 16
479	  4	116.5	23.7	 16
480	  4	69.0	9.2	 16
481	  4	72.5	11.2	 16
482	  4	97.8	13.3	 16
483	  4	118.5	25.3	 16
484	  4	79.5	13.1	 16
485	  4	145.0	21.7	 16
486	  4	84.0	15.5	 16
487	  4	77.3	11.9	 16
488	  4	127.5	16.7	 16
489	  4	61.3	9.7	 16
490	  4	59.3	9.7	 16
491	  4	68.5	14.3	 16
492	  4	84.0	11.4	 16
493	  4	124.8	20.0	 16
494	  4	87.3	21.5	 16
495	  4	451.8	71.9	 16
496	  4	112.5	18.0	 16
497	  4	516.0	35.2	 16
498	  4	104.3	16.6	 16
499	  4	82.8	14.6	 16
500	  4	108.0	15.5	 16
501	  4	171.0	33.0	 16
502	  4	260.8	40.1	 16
503	  4	57.3	12.5	 16
504	  4	64.8	14.4	 16
505	  4	1425.0	232.7	 16
506	  4	123.3	22.3	 16
507	  4	122.8	13.4	 16
508	  4	94.3	16.1	 16
509	  4	183.5	18.7	 16
510	  4	342.3	30.3	 16
511	  4	213.5	24.8	 16
512	  4	247.3	35.5	 16
513	  4	58.3	10.5	 16
514	  4	73.0	8.8	 16
515	  4	59.8	8.2	 16
516	  4	135.0	19.5	 16
517	  4	126.8	23.0	 16
518	  4	100.8	11.6	 16
519	  4	94.8	14.1	 16
520	  4	59.8	14.8	 16
521	  4	83.3	15.8	 16
522	  4	226.3	29.1	 16
523	  4	202.5	18.4	 16
524	  4	178.5	35.5	 16
525	  4	67.0	10.7	 16
526	  4	80.0	14.6	 16
527	  4	73.8	11.6	 16
528	  4	95.5	19.3	 16
529	  4	76.5	10.2	 16
530	  4	80.8	13.7	 16
531	  4	65.5	15.2	 16
532	  4	103.0	14.3	 16
533	  4	72.3	9.9	 16
534	  4	118.8	17.3	 16
535	  4	194.3	20.2	 16
536	  4	146.5	17.5	 16
537	  4	145.5	16.8	 16
538	  4	96.8	13.9	 16
539	  4	120.8	14.4	 16
540	  4	68.5	10.6	 16
541	  4	97.5	13.4	 16
542	  4	108.5	13.6	 16
543	  4	348.3	38.1	 16
544	  4	284.0	44.2	 16
545	  4	163.0	26.1	 16
546	  4	106.3	27.9	 16
547	  4	149.5	15.9	 16
548	  4	357.0	54.1	 20
549	  4	93.5	15.3	 16
550	  4	69.0	18.3	 16
551	  4	84.8	17.0	 16
552	  4	109.0	27.4	 16
553	  4	72.5	12.3	 16
554	  4	325.5	101.8	 16
555	  4	77.3	12.4	 16
556	  4	116.5	26.3	 16
557	  4	79.0	11.6	 16
558	  4	130.8	30.9	 16
559	  4	297.8	41.0	 16
560	  4	673.8	116.0	 16
561	  4	1017.3	96.3	 16
562	  4	447.0	31.7	 16
563	  4	94.5	19.8	 16
564	  4	282.0	34.4	 16
565	  4	223.5	32.4	 16
566	  4	510.8	72.3	 16
567	  4	61.0	12.5	 16
568	  4	113.0	20.7	 16
569	  4	83.0	10.9	 16
570	  4	71.3	10.2	 16
571	  4	67.0	10.1	 16
572	  4	180.3	26.9	 16
573	  4	68.5	11.1	 16
574	  4	92.0	12.0	 16
575	  4	159.8	31.6	 16
576	  4	127.5	19.0	 16
577	  4	224.5	30.5	 16
578	  4	91.5	14.6	 16
579	  4	134.5	19.8	 16
580	  4	135.8	21.1	 16
581	  4	133.0	28.8	 16
582	  4	145.0	22.4	 16
583	  4	173.3	26.9	 16
584	  4	252.3	42.0	 16
585	  4	328.5	51.5	 16
586	  4	115.0	18.1	 16
587	  4	129.3	29.5	 16
588	  4	160.0	19.5	 16
589	  4	153.3	24.6	 16
590	  4	140.5	52.7	 16
591	  4	101.5	15.2	 16
592	  4	163.8	20.0	 16
593	  4	117.3	18.6	 16
594	  4	100.0	19.3	 16
595	  4	137.8	176.1	 16
596	  4	106.0	19.2	 16
597	  4	106.5	14.3	 16
598	  4	100.5	18.5	 16
599	  4	187.8	109.8	 16
600	  4	244.3	28.9	 16
601	  4	232.0	27.5	 16
602	  4	339.5	59.6	 16
603	  4	580.8	64.0	 16
604	  4	130.3	17.8	 16
605	  4	183.3	43.0	 16
606	  4	91.3	15.3	 16
607	  4	100.5	19.5	 16
608	  4	179.3	34.7	 16
609	  4	141.0	20.6	 16
610	  4	169.3	23.0	 16
611	  4	110.0	14.0	 16
612	  4	81.3	21.8	 16
613	  4	78.5	36.2	 16
614	  4	107.5	12.4	 16
615	  4	65.5	12.8	 16
616	  4	91.3	16.3	 16
617	  4	136.5	30.3	 16
618	  4	76.3	14.4	 16
619	  4	88.8	16.0	 16
620	  4	376.8	50.9	 16
621	  4	97.8	18.6	 16
622	  4	60.0	9.3	 16
623	  4	85.5	11.8	 16
624	  4	56.3	10.1	 16
625	  4	167.5	16.3	 16
626	  4	84.8	11.3	 16
627	  4	241.8	28.9	 16
628	  4	252.5	40.6	 16
629	  4	317.8	34.5	 16
630	  4	88.8	21.9	 16
631	  4	112.5	21.4	 16
632	  4	76.5	12.7	 16
633	  4	150.3	32.1	 16
634	  4	135.5	44.0	 16
635	  4	97.3	14.5	 16
636	  4	151.0	25.7	 16
637	  4	241.0	39.2	 16
638	  4	155.3	97.7	 16
639	  4	127.3	16.6	 16
640	  4	122.5	12.7	 16
641	  4	93.5	14.2	 16
642	  4	67.3	11.1	 16
643	  4	86.0	14.0	 16
644	  4	183.3	23.1	 16
645	  4	185.3	23.7	 16
646	  4	217.0	50.3	 16
647	  4	62.0	11.9	 16
648	  4	111.3	18.6	 16
649	  4	78.5	13.9	 16
650	  4	60.0	8.0	 16
651	  4	113.0	18.8	 16
652	  4	68.3	9.8	 16
653	  4	71.5	13.1	 16
654	  4	59.8	14.0	 16
655	  4	93.5	27.3	 16
656	  4	95.0	17.9	 16
657	  4	70.0	12.4	 16
658	  4	59.3	8.3	 16
659	  4	76.3	15.2	 16
660	  4	71.3	10.9	 16
661	  4	241.5	38.7	 16
662	  4	215.3	27.7	 16
663	  4	393.0	42.2	 16
664	  4	210.8	41.5	 16
665	  4	130.3	17.4	 16
666	  4	407.5	53.0	 16
667	  4	82.3	12.3	 20
668	  4	92.3	14.3	 16
669	  4	78.3	15.1	 16
670	  4	107.8	14.3	 16
671	  4	168.8	21.9	 16
672	  4	134.0	21.4	 16
673	  4	550.0	52.6	 16
674	  4	402.8	59.8	 16
675	  4	293.3	37.5	 16
676	  4	86.0	15.4	 16
677	  4	132.8	22.3	 16
678	  4	59.3	7.9	 16
679	  4	77.3	14.4	 16
680	  4	161.8	26.3	 16
681	  4	62.3	19.4	 16
682	  4	71.0	13.9	 16
683	  4	73.8	13.5	 16
684	  4	76.5	16.5	 16
685	  4	115.0	26.1	 16
686	  4	170.3	16.7	 16
687	  4	82.0	16.0	 16
688	  4	71.8	15.9	 16
689	  4	88.0	12.7	 16
690	  4	667.3	91.8	 16
691	  4	131.3	26.8	 16
692	  4	423.5	46.0	 16
693	  4	102.5	17.4	 16
694	  4	141.8	20.6	 16
695	  4	220.5	30.4	 16
696	  4	237.8	35.8	 16
697	  4	60.5	12.1	 16
698	  4	87.0	10.4	 16
699	  4	107.0	18.8	 16
700	  4	144.3	22.3	 16
701	  4	112.0	19.4	 16
702	  4	152.0	21.0	 16
703	  4	299.8	39.1	 16
704	  4	322.5	47.2	 16
705	  4	387.3	50.6	 16
706	  4	108.5	38.9	 16
707	  4	47.3	7.2	 16
708	  4	50.3	10.6	 16
709	  4	46.0	7.1	 16
710	  4	51.8	8.0	 16
711	  4	52.0	7.9	 16
  0	  5	101.5	18.4	 16
  1	  5	72.5	9.2	 16
  2	  5	80.8	12.3	 16
  3	  5	161.0	25.8	 16
  4	  5	76.5	13.4	 16
  5	  5	180.8	38.7	 16
  6	  5	1123.0	253.1	 16
  7	  5	151.3	19.2	 16
  8	  5	100.0	17.6	 16
  9	  5	181.3	27.2	 16
 10	  5	209.3	42.8	 16
 11	  5	91.0	14.1	 16
 12	  5	113.5	19.1	 16
 13	  5	6431.3	598.7	 16
 14	  5	6634.3	535.4	 16
 15	  5	5691.0	753.2	 16
 16	  5	124.5	19.3	 16
 17	  5	71.0	11.1	 16
 18	  5	127.5	21.5	 16
 19	  5	110.0	17.3	 16
 20	  5	100.5	21.3	 16
 21	  5	105.0	13.1	 16
 22	  5	114.3	19.7	 16
 23	  5	92.5	22.1	 16
 24	  5	122.3	16.8	 16
 25	  5	119.0	24.3	 16
 26	  5	93.0	11.1	 16
 27	  5	107.3	24.8	 16
 28	  5	114.5	20.1	 16
 29	  5	68.0	12.6	 16
 30	  5	99.8	11.8	 16
 31	  5	112.0	14.7	 16
 32	  5	99.3	12.1	 16
 33	  5	112.3	20.8	 16
 34	  5	111.0	12.4	 16
 35	  5	74.8	12.0	 16
 36	  5	124.3	18.9	 16
 37	  5	5890.5	441.3	 16
 38	  5	6462.3	384.2	 16
 39	  5	6401.3	874.8	 16
 40	  5	119.0	18.3	 16
 41	  5	81.0	9.2	 16
 42	  5	5272.3	824.1	 16
 43	  5	119.5	20.2	 16
 44	  5	115.8	19.2	 16
 45	  5	97.3	14.7	 16
 46	  5	100.3	11.8	 16
 47	  5	64.5	14.9	 16
 48	  5	109.5	43.8	 16
 49	  5	103.0	13.7	 16
 50	  5	106.8	17.5	 16
 51	  5	114.0	17.7	 16
 52	  5	116.5	23.8	 16
 53	  5	73.3	10.6	 16
 54	  5	113.0	18.7	 16
 55	  5	121.5	20.1	 16
 56	  5	111.0	18.1	 16
 57	  5	116.3	21.1	 16
 58	  5	102.0	13.2	 16
 59	  5	70.5	14.4	 16
 60	  5	70.8	13.6	 16
 61	  5	80.3	9.4	 16
 62	  5	5318.5	649.2	 16
 63	  5	123.0	26.9	 16
 64	  5	110.3	15.0	 16
 65	  5	122.3	17.4	 16
 66	  5	5894.0	849.9	 16
 67	  5	99.3	17.9	 16
 68	  5	118.5	18.4	 16
 69	  5	5336.8	774.2	 16
 70	  5	5507.0	754.7	 16
 71	  5	5123.5	831.0	 16
 72	  5	122.0	19.5	 16
 73	  5	77.3	12.0	 16
 74	  5	106.0	14.8	 16
 75	  5	99.8	16.7	 16
 76	  5	110.8	18.6	 16
 77	  5	110.0	17.9	 20
 78	  5	104.0	14.2	 16
 79	  5	76.3	12.6	 16
 80	  5	5670.0	1563.3	 16
 81	  5	120.0	11.5	 16
 82	  5	189.8	141.0	 16
 83	  5	119.3	23.8	 16
 84	  5	6548.0	1354.5	 16
 85	  5	86.0	18.4	 16
 86	  5	101.3	15.0	 16
 87	  5	125.3	14.0	 16
 88	  5	5443.0	1086.2	 16
 89	  5	140.3	22.1	 16
 90	  5	106.0	17.2	 16
 91	  5	79.0	11.3	 16
 92	  5	110.0	15.6	 16
 93	  5	5023.3	946.8	 16
 94	  5	5047.3	1112.8	 16
 95	  5	139.3	27.9	 16
 96	  5	116.3	16.6	 16
 97	  5	67.8	10.6	 16
 98	  5	115.8	20.7	 16
 99	  5	5825.8	1222.0	 16
100	  5	5715.0	1409.3	 16
101	  5	131.3	18.9	 16
102	  5	116.3	19.3	 16
103	  5	80.0	14.7	 16
104	  5	111.3	14.5	 16
105	  5	103.3	11.8	 16
106	  5	4633.3	1342.3	 16
107	  5	100.5	9.2	 16
108	  5	114.5	17.3	 16
109	  5	68.0	11.6	 16
110	  5	84.3	15.4	 16
111	  5	128.3	20.8	 16
112	  5	321.3	97.7	 16
113	  5	108.5	75.5	 16
114	  5	84.3	15.8	 16
115	  5	181.5	30.0	 16
116	  5	124.8	20.9	 16
117	  5	161.3	25.2	 16
118	  5	5719.3	1127.6	 16
119	  5	409.5	74.2	 16
120	  5	99.5	16.3	 16
121	  5	94.0	15.4	 16
122	  5	76.8	12.7	 16
123	  5	84.3	16.1	 16
124	  5	78.3	15.8	 16
125	  5	70.3	15.7	 16
126	  5	617.0	154.0	 16
127	  5	96.5	11.2	 16
128	  5	1012.0	311.9	 16
129	  5	341.8	78.9	 16
130	  5	150.0	16.2	 16
131	  5	332.5	50.7	 16
132	  5	78.3	12.4	 16
133	  5	309.3	38.0	 16
134	  5	233.5	21.3	 16
135	  5	156.5	13.3	 16
136	  5	81.0	15.8	 16
137	  5	67.3	9.7	 16
138	  5	74.5	10.6	 16
139	  5	880.5	146.0	 16
140	  5	75.3	14.4	 16
141	  5	508.5	99.9	 16
142	  5	70.5	13.2	 16
143	  5	978.3	209.8	 16
144	  5	144.3	26.7	 16
145	  5	88.0	17.8	 16
146	  5	151.0	23.8	 16
147	  5	971.0	173.3	 16
148	  5	86.0	19.6	 16
149	  5	94.5	15.8	 16
150	  5	178.3	39.1	 16
151	  5	116.8	23.3	 16
152	  5	316.0	60.6	 16
153	  5	253.8	62.6	 16
154	  5	402.8	53.2	 16
155	  5	91.3	20.7	 16
156	  5	179.3	29.8	 16
157	  5	293.5	40.6	 16
158	  5	270.5	34.4	 16
159	  5	399.8	36.1	 16
160	  5	170.3	23.8	 16
161	  5	234.0	34.2	 16
162	  5	236.3	39.6	 16
163	  5	203.3	22.7	 16
164	  5	205.0	30.2	 16
165	  5	1063.8	215.6	 16
166	  5	258.0	35.2	 16
167	  5	161.3	22.9	 16
168	  5	79.3	7.4	 16
169	  5	335.5	57.2	 16
170	  5	163.3	28.4	 16
171	  5	254.5	54.4	 16
172	  5	332.3	73.5	 16
173	  5	95.0	20.3	 16
174	  5	638.3	177.5	 16
175	  5	141.3	22.8	 16
176	  5	81.5	16.7	 16
177	  5	74.5	11.0	 16
178	  5	69.3	9.5	 16
179	  5	145.0	22.5	 16
180	  5	565.3	107.0	 16
181	  5	919.8	116.5	 16
182	  5	165.5	24.5	 16
183	  5	109.0	14.7	 16
184	  5	64.5	14.0	 16
185	  5	729.5	96.7	 16
186	  5	192.0	30.8	 16
187	  5	84.3	13.4	 16
188	  5	147.8	20.7	 16
189	  5	110.5	20.8	 16
190	  5	85.5	13.9	 16
191	  5	80.8	21.4	 16
192	  5	235.5	23.6	 16
193	  5	194.0	36.5	 16
194	  5	305.3	39.5	 16
195	  5	234.8	42.1	 16
196	  5	254.0	26.4	 20
197	  5	277.5	35.4	 16
198	  5	197.5	25.7	 16
199	  5	116.8	23.2	 16
200	  5	216.3	23.4	 16
201	  5	113.3	18.7	 16
202	  5	110.5	17.4	 16
203	  5	116.0	19.6	 16
204	  5	100.3	15.8	 16
205	  5	63.5	8.5	 16
206	  5	868.8	169.4	 16
207	  5	68.3	11.4	 16
208	  5	70.0	9.5	 16
209	  5	164.0	22.3	 16
210	  5	353.3	66.1	 16
211	  5	84.5	16.7	 16
212	  5	110.0	22.5	 16
213	  5	349.5	71.9	 16
214	  5	630.3	120.3	 16
215	  5	118.3	18.7	 16
216	  5	168.8	32.2	 16
217	  5	1267.5	319.4	 16
218	  5	78.5	11.5	 16
219	  5	72.8	15.3	 16
220	  5	75.0	13.9	 16
221	  5	326.5	72.0	 16
222	  5	121.5	28.9	 16
223	  5	111.5	31.3	 16
224	  5	198.3	38.2	 16
225	  5	62.5	13.1	 16
226	  5	173.0	42.8	 16
227	  5	445.3	61.3	 16
228	  5	122.0	17.5	 16
229	  5	409.0	43.7	 16
230	  5	91.0	34.0	 16
231	  5	210.8	38.7	 16
232	  5	81.3	12.8	 16
233	  5	221.0	36.3	 16
234	  5	67.0	14.0	 16
235	  5	841.0	99.7	 16
236	  5	71.0	11.0	 16
237	  5	90.3	13.2	 16
238	  5	160.5	15.3	 16
239	  5	414.5	85.4	 16
240	  5	97.5	19.7	 16
241	  5	72.3	11.8	 16
242	  5	101.3	17.2	 16
243	  5	325.5	52.1	 16
244	  5	105.8	22.7	 16
245	  5	515.8	88.8	 16
246	  5	311.5	65.8	 16
247	  5	136.0	35.0	 16
248	  5	201.0	49.6	 16
249	  5	129.3	14.4	 16
250	  5	83.5	15.3	 16
251	  5	5004.0	792.9	 16
252	  5	67.0	19.8	 16
253	  5	64.0	12.7	 16
254	  5	57.8	9.7	 16
255	  5	649.0	120.2	 16
256	  5	1121.8	191.0	 16
257	  5	133.0	20.1	 16
258	  5	161.3	40.8	 16
259	  5	61.3	8.9	 16
260	  5	69.3	18.8	 16
261	  5	69.0	8.2	 16
262	  5	461.0	88.9	 16
263	  5	69.0	14.3	 16
264	  5	172.0	45.5	 16
265	  5	82.3	14.5	 16
266	  5	62.0	10.4	 16
267	  5	134.3	183.2	 16
268	  5	97.8	17.4	 16
269	  5	140.5	26.8	 16
270	  5	110.3	21.5	 16
271	  5	1148.8	325.0	 16
272	  5	415.5	119.2	 16
273	  5	103.5	30.8	 16
274	  5	88.0	16.3	 16
275	  5	107.5	22.6	 16
276	  5	66.8	19.6	 16
277	  5	70.3	12.3	 16
278	  5	239.0	48.4	 16
279	  5	118.0	16.8	 16
280	  5	160.5	24.7	 16
281	  5	1327.5	126.9	 16
282	  5	1321.3	162.0	 16
283	  5	423.0	64.3	 16
284	  5	242.0	107.3	 16
285	  5	468.3	57.7	 16
286	  5	83.5	14.3	 16
287	  5	106.0	14.6	 16
288	  5	346.3	64.3	 16
289	  5	246.5	35.8	 16
290	  5	1981.5	417.4	 16
291	  5	204.0	31.1	 16
292	  5	185.8	29.5	 16
293	  5	220.0	23.3	 16
294	  5	967.0	198.9	 16
295	  5	433.3	105.9	 16
296	  5	207.3	27.2	 16
297	  5	157.5	24.4	 16
298	  5	110.0	20.2	 16
299	  5	82.5	14.2	 16
300	  5	3334.0	367.7	 16
301	  5	171.0	22.3	 16
302	  5	778.0	107.2	 16
303	  5	1038.8	137.6	 16
304	  5	76.3	16.5	 16
305	  5	77.5	15.4	 16
306	  5	657.0	89.3	 16
307	  5	81.3	15.6	 16
308	  5	371.5	49.2	 16
309	  5	201.3	31.9	 16
310	  5	129.3	27.2	 16
311	  5	352.0	36.9	 16
312	  5	164.0	31.8	 16
313	  5	336.8	63.9	 16
314	  5	254.3	39.9	 16
315	  5	215.3	55.3	 20
316	  5	138.0	26.5	 16
317	  5	186.0	46.6	 16
318	  5	304.5	69.6	 16
319	  5	99.8	21.3	 16
320	  5	68.5	14.0	 16
321	  5	115.3	25.8	 16
322	  5	73.0	11.6	 16
323	  5	123.0	33.6	 16
324	  5	247.0	40.7	 16
325	  5	155.5	20.9	 16
326	  5	278.0	36.5	 16
327	  5	253.5	39.2	 16
328	  5	76.3	13.6	 16
329	  5	398.0	61.6	 16
330	  5	742.3	120.9	 16
331	  5	127.8	21.8	 16
332	  5	128.5	14.4	 16
333	  5	645.8	121.4	 16
334	  5	182.5	40.5	 16
335	  5	88.5	13.5	 16
336	  5	91.0	13.6	 16
337	  5	101.8	12.5	 16
338	  5	97.8	12.2	 16
339	  5	85.0	17.6	 16
340	  5	188.5	19.8	 16
341	  5	485.3	74.8	 16
342	  5	83.0	14.5	 16
343	  5	70.3	11.3	 16
344	  5	102.5	14.7	 16
345	  5	101.3	12.7	 16
346	  5	111.0	20.3	 16
347	  5	3444.5	593.4	 16
348	  5	120.3	19.1	 16
349	  5	240.0	45.8	 16
350	  5	174.5	22.6	 16
351	  5	561.8	42.9	 16
352	  5	555.3	56.7	 16
353	  5	134.3	19.7	 16
354	  5	120.0	21.2	 16
355	  5	5449.3	979.0	 16
356	  5	94.0	12.9	 16
357	  5	308.3	61.5	 16
358	  5	192.0	26.6	 16
359	  5	95.3	13.5	 16
360	  5	101.5	18.2	 16
361	  5	203.0	24.6	 16
362	  5	587.0	123.9	 16
363	  5	70.3	10.3	 16
364	  5	70.0	20.4	 16
365	  5	71.3	13.2	 16
366	  5	99.0	17.9	 16
367	  5	2694.0	614.0	 16
368	  5	264.3	61.5	 16
369	  5	366.5	48.1	 16
370	  5	94.8	11.7	 16
371	  5	340.3	44.5	 16
372	  5	436.8	42.3	 16
373	  5	200.3	21.0	 16
374	  5	147.0	16.3	 16
375	  5	106.0	12.9	 16
376	  5	86.0	14.8	 16
377	  5	107.3	14.2	 16
378	  5	153.3	17.5	 16
379	  5	134.0	20.6	 16
380	  5	187.3	27.5	 16
381	  5	105.3	16.5	 16
382	  5	307.3	39.4	 16
383	  5	391.5	32.6	 16
384	  5	78.0	13.9	 16
385	  5	123.5	15.5	 16
386	  5	207.5	39.7	 16
387	  5	400.8	67.6	 16
388	  5	341.5	66.6	 16
389	  5	1909.5	419.4	 16
390	  5	135.3	22.4	 16
391	  5	88.3	19.3	 16
392	  5	740.0	63.3	 16
393	  5	97.8	17.6	 16
394	  5	171.3	19.0	 16
395	  5	69.5	11.4	 16
396	  5	73.0	15.3	 16
397	  5	287.0	34.4	 16
398	  5	654.8	141.9	 16
399	  5	346.8	52.4	 16
400	  5	786.3	95.3	 16
401	  5	216.8	29.7	 16
402	  5	158.3	24.0	 16
403	  5	76.0	10.4	 16
404	  5	301.0	47.6	 16
405	  5	85.8	18.7	 16
406	  5	129.3	17.3	 16
407	  5	113.8	21.5	 16
408	  5	180.0	28.1	 16
409	  5	89.8	16.8	 16
410	  5	154.3	19.7	 16
411	  5	166.0	26.7	 16
412	  5	89.5	13.2	 16
413	  5	139.3	22.8	 16
414	  5	161.3	22.8	 16
415	  5	7549.8	581.9	 16
416	  5	6830.0	607.4	 16
417	  5	541.8	56.4	 16
418	  5	136.5	22.1	 16
419	  5	287.0	37.0	 16
420	  5	77.3	7.2	 16
421	  5	118.3	23.8	 16
422	  5	70.0	10.6	 16
423	  5	150.0	22.6	 16
424	  5	129.5	22.2	 16
425	  5	138.5	27.2	 16
426	  5	116.8	20.8	 16
427	  5	67.3	11.5	 16
428	  5	109.0	24.8	 16
429	  5	121.0	15.5	 16
430	  5	112.0	21.8	 16
431	  5	125.3	17.8	 16
432	  5	155.8	30.6	 16
433	  5	241.0	59.2	 20
434	  5	286.3	63.6	 16
435	  5	126.3	28.6	 16
436	  5	102.0	61.7	 16
437	  5	74.3	12.9	 16
438	  5	92.0	12.6	 16
439	  5	237.3	35.1	 16
440	  5	151.0	19.9	 16
441	  5	144.5	20.7	 16
442	  5	203.5	23.9	 16
443	  5	247.8	21.8	 16
444	  5	245.5	42.1	 16
445	  5	213.5	31.3	 16
446	  5	269.8	51.3	 16
447	  5	82.0	13.0	 16
448	  5	235.0	32.2	 16
449	  5	1559.5	320.0	 16
450	  5	865.8	107.0	 16
451	  5	1556.0	370.5	 16
452	  5	365.0	36.4	 16
453	  5	179.0	34.1	 16
454	  5	833.8	211.3	 16
455	  5	350.5	91.2	 16
456	  5	79.0	14.6	 16
457	  5	128.8	20.4	 16
458	  5	511.0	70.8	 16
459	  5	117.8	20.8	 16
460	  5	111.3	15.7	 16
461	  5	423.0	80.8	 16
462	  5	96.8	17.1	 16
463	  5	549.0	77.7	 16
464	  5	2133.3	144.2	 16
465	  5	586.8	91.8	 16
466	  5	112.3	18.5	 16
467	  5	107.5	18.6	 16
468	  5	106.3	19.4	 16
469	  5	172.0	22.0	 16
470	  5	140.3	15.0	 16
471	  5	108.8	24.7	 16
472	  5	204.8	27.6	 16
473	  5	175.0	23.2	 16
474	  5	69.5	12.8	 16
475	  5	77.3	12.6	 16
476	  5	186.3	27.8	 16
477	  5	142.0	25.0	 16
478	  5	271.5	42.2	 16
479	  5	342.3	69.9	 16
480	  5	139.3	27.4	 16
481	  5	150.5	22.8	 16
482	  5	203.0	30.0	 16
483	  5	98.8	19.7	 16
484	  5	159.0	19.9	 16
485	  5	650.3	104.9	 16
486	  5	91.0	12.5	 16
487	  5	360.0	66.1	 16
488	  5	104.0	16.0	 16
489	  5	110.5	27.3	 16
490	  5	105.3	15.8	 16
491	  5	361.8	38.8	 16
492	  5	78.5	10.0	 16
493	  5	180.3	34.1	 16
494	  5	100.5	17.4	 16
495	  5	322.0	46.1	 16
496	  5	493.8	111.4	 16
497	  5	133.0	21.9	 16
498	  5	393.3	70.9	 16
499	  5	65.3	9.4	 16
500	  5	116.0	9.8	 16
501	  5	135.0	21.0	 16
502	  5	75.5	13.8	 16
503	  5	632.3	114.8	 16
504	  5	93.0	13.8	 16
505	  5	449.5	73.5	 16
506	  5	72.0	11.5	 16
507	  5	66.0	11.9	 16
508	  5	315.0	42.2	 16
509	  5	5962.0	1259.0	 16
510	  5	133.5	24.1	 16
511	  5	689.5	67.9	 16
512	  5	97.8	57.1	 16
513	  5	99.8	18.3	 16
514	  5	90.0	17.3	 16
515	  5	148.8	22.8	 16
516	  5	78.5	12.9	 16
517	  5	292.5	22.2	 16
518	  5	401.3	66.0	 16
519	  5	96.5	17.7	 16
520	  5	87.3	15.0	 16
521	  5	284.5	45.5	 16
522	  5	335.5	55.3	 16
523	  5	203.3	26.0	 16
524	  5	816.0	77.3	 16
525	  5	70.5	12.1	 16
526	  5	194.3	30.5	 16
527	  5	923.5	179.4	 16
528	  5	86.5	9.6	 16
529	  5	1212.3	221.5	 16
530	  5	463.3	100.5	 16
531	  5	226.3	35.1	 16
532	  5	126.8	23.3	 16
533	  5	270.3	55.2	 16
534	  5	229.3	22.0	 16
535	  5	202.0	34.5	 16
536	  5	722.8	56.4	 16
537	  5	108.3	19.8	 16
538	  5	6647.5	547.1	 16
539	  5	1756.8	220.4	 16
540	  5	76.8	12.2	 16
541	  5	163.3	29.6	 16
542	  5	353.8	63.0	 16
543	  5	102.0	20.0	 16
544	  5	237.8	42.5	 16
545	  5	322.5	38.8	 16
546	  5	301.3	42.0	 16
547	  5	254.5	26.6	 16
548	  5	169.8	19.9	 16
549	  5	143.3	25.3	 16
550	  5	88.5	16.9	 16
551	  5	211.0	35.3	 16
552	  5	63.0	11.8	 20
553	  5	164.8	42.3	 16
554	  5	81.8	17.8	 16
555	  5	146.0	26.3	 16
556	  5	121.3	21.9	 16
557	  5	135.3	23.5	 16
558	  5	70.5	14.5	 16
559	  5	119.0	13.2	 16
560	  5	230.5	30.4	 16
561	  5	290.0	40.2	 16
562	  5	8761.8	1225.5	 16
563	  5	90.0	16.8	 16
564	  5	105.3	16.9	 16
565	  5	191.0	25.9	 16
566	  5	1165.5	157.9	 16
567	  5	1505.8	241.5	 16
568	  5	324.5	54.1	 16
569	  5	220.3	33.2	 16
570	  5	1281.3	145.8	 16
571	  5	99.3	19.2	 16
572	  5	228.8	43.7	 16
573	  5	83.5	16.5	 16
574	  5	104.0	19.2	 16
575	  5	221.0	29.6	 16
576	  5	257.8	35.6	 16
577	  5	85.5	20.5	 16
578	  5	313.8	38.2	 16
579	  5	3723.0	791.7	 16
580	  5	197.5	30.1	 16
581	  5	464.8	50.6	 16
582	  5	620.0	43.7	 16
583	  5	290.5	40.7	 16
584	  5	154.3	35.9	 16
585	  5	159.8	24.6	 16
586	  5	170.3	21.9	 16
587	  5	293.5	36.3	 16
588	  5	147.0	25.4	 16
589	  5	77.5	14.9	 16
590	  5	75.3	11.6	 16
591	  5	78.3	13.4	 16
592	  5	323.5	34.6	 16
593	  5	386.5	54.7	 16
594	  5	159.3	21.5	 16
595	  5	129.0	38.4	 16
596	  5	169.0	17.3	 16
597	  5	366.5	47.3	 16
598	  5	580.5	94.6	 16
599	  5	56.3	14.7	 16
600	  5	145.8	26.1	 16
601	  5	307.8	42.8	 16
602	  5	983.8	213.6	 16
603	  5	87.0	12.4	 16
604	  5	94.3	18.8	 16
605	  5	76.0	14.0	 16
606	  5	88.5	13.2	 16
607	  5	81.8	16.4	 16
608	  5	75.3	11.1	 16
609	  5	215.8	27.6	 16
610	  5	70.3	10.6	 16
611	  5	68.5	12.8	 16
612	  5	200.3	22.5	 16
613	  5	79.0	16.0	 16
614	  5	156.3	21.0	 16
615	  5	110.0	16.4	 16
616	  5	252.0	25.1	 16
617	  5	295.8	29.4	 16
618	  5	281.8	50.7	 16
619	  5	81.8	18.7	 16
620	  5	71.8	11.0	 16
621	  5	71.0	11.3	 16
622	  5	66.8	12.5	 16
623	  5	199.3	27.8	 16
624	  5	265.0	20.1	 16
625	  5	165.8	21.0	 16
626	  5	583.8	57.0	 16
627	  5	83.0	14.2	 16
628	  5	83.8	18.0	 16
629	  5	348.8	40.9	 16
630	  5	84.5	18.2	 16
631	  5	78.5	14.6	 16
632	  5	259.8	27.5	 16
633	  5	116.3	22.5	 16
634	  5	192.5	21.4	 16
635	  5	116.3	30.6	 16
636	  5	108.5	13.1	 16
637	  5	939.3	100.2	 16
638	  5	334.0	26.2	 16
639	  5	85.5	8.0	 16
640	  5	154.5	20.9	 16
641	  5	77.8	13.2	 16
642	  5	58.3	10.9	 16
643	  5	147.0	16.6	 16
644	  5	217.5	28.7	 16
645	  5	201.8	43.9	 16
646	  5	89.5	16.1	 16
647	  5	61.0	9.4	 16
648	  5	984.0	181.9	 16
649	  5	92.3	18.7	 16
650	  5	108.5	16.5	 16
651	  5	344.3	31.5	 16
652	  5	136.3	18.1	 16
653	  5	66.3	11.2	 16
654	  5	135.0	22.7	 16
655	  5	258.8	31.0	 16
656	  5	190.3	31.8	 16
657	  5	2293.8	219.3	 16
658	  5	85.3	17.4	 16
659	  5	509.3	57.7	 16
660	  5	354.5	39.3	 16
661	  5	741.8	136.9	 16
662	  5	161.5	21.6	 16
663	  5	200.0	25.5	 16
664	  5	4392.8	617.1	 16
665	  5	172.5	34.7	 16
666	  5	382.3	51.7	 16
667	  5	127.0	20.1	 16
668	  5	338.8	30.1	 16
669	  5	794.8	159.7	 16
670	  5	129.3	23.4	 20
671	  5	114.5	21.9	 16
672	  5	163.0	24.6	 16
673	  5	123.3	29.3	 16
674	  5	164.5	28.3	 16
675	  5	112.3	19.7	 16
676	  5	102.3	16.4	 16
677	  5	92.0	17.5	 16
678	  5	154.8	19.6	 16
679	  5	4326.0	800.2	 16
680	  5	79.3	13.2	 16
681	  5	460.8	53.0	 16
682	  5	91.3	14.8	 16
683	  5	117.3	14.6	 16
684	  5	108.8	19.2	 16
685	  5	59.5	9.3	 16
686	  5	70.0	11.9	 16
687	  5	87.3	18.0	 16
688	  5	6129.3	742.9	 16
689	  5	319.3	25.2	 16
690	  5	137.5	15.5	 16
691	  5	541.3	107.6	 16
692	  5	154.3	25.4	 16
693	  5	352.8	39.8	 16
694	  5	306.3	44.9	 16
695	  5	274.3	34.7	 16
696	  5	106.8	17.9	 16
697	  5	117.0	20.4	 16
698	  5	90.5	14.4	 16
699	  5	476.0	109.3	 16
700	  5	75.3	11.6	 16
701	  5	116.8	16.9	 16
702	  5	154.3	25.9	 16
703	  5	262.3	26.2	 16
704	  5	85.3	14.4	 16
705	  5	377.0	43.6	 16
706	  5	195.0	25.1	 16
707	  5	200.5	58.1	 16
708	  5	75.8	14.4	 16
709	  5	125.0	15.8	 16
710	  5	155.3	17.2	 16
711	  5	81.8	16.5	 16
  0	  6	5316.0	772.4	 16
  1	  6	89.0	14.8	 16
  2	  6	91.0	15.4	 16
  3	  6	115.0	12.9	 16
  4	  6	76.5	10.7	 16
  5	  6	111.0	16.1	 16
  6	  6	376.0	75.7	 16
  7	  6	112.3	11.7	 16
  8	  6	115.5	21.4	 16
  9	  6	340.0	37.6	 16
 10	  6	195.5	27.4	 16
 11	  6	67.3	7.5	 16
 12	  6	6657.8	669.9	 16
 13	  6	107.8	16.1	 16
 14	  6	135.0	12.2	 16
 15	  6	118.3	14.1	 16
 16	  6	5615.5	726.1	 16
 17	  6	87.3	14.5	 16
 18	  6	117.0	18.9	 16
 19	  6	121.3	17.4	 16
 20	  6	123.5	20.0	 16
 21	  6	124.0	19.2	 16
 22	  6	105.3	9.7	 16
 23	  6	76.5	14.3	 16
 24	  6	113.3	12.3	 16
 25	  6	125.3	26.0	 16
 26	  6	120.8	22.7	 16
 27	  6	120.3	10.9	 16
 28	  6	109.5	16.3	 16
 29	  6	81.0	12.4	 16
 30	  6	113.5	18.9	 16
 31	  6	132.5	36.1	 16
 32	  6	135.5	26.1	 16
 33	  6	129.3	14.6	 16
 34	  6	103.5	12.2	 16
 35	  6	86.8	15.6	 16
 36	  6	6503.5	989.7	 16
 37	  6	131.0	16.0	 16
 38	  6	111.0	10.2	 16
 39	  6	130.3	15.5	 16
 40	  6	6802.3	897.6	 16
 41	  6	86.0	15.4	 16
 42	  6	5936.0	808.2	 16
 43	  6	122.3	18.7	 16
 44	  6	112.8	18.7	 16
 45	  6	114.8	17.1	 16
 46	  6	112.0	17.1	 16
 47	  6	71.3	12.4	 16
 48	  6	115.0	13.6	 16
 49	  6	122.3	27.5	 16
 50	  6	107.5	16.9	 16
 51	  6	118.0	16.2	 16
 52	  6	119.3	20.6	 16
 53	  6	71.8	12.2	 16
 54	  6	101.8	15.4	 16
 55	  6	126.8	26.1	 16
 56	  6	97.3	16.9	 16
 57	  6	116.3	12.2	 16
 58	  6	112.3	19.8	 16
 59	  6	67.5	11.4	 16
 60	  6	67.3	8.3	 16
 61	  6	76.3	11.8	 16
 62	  6	5727.0	528.5	 16
 63	  6	139.0	21.3	 16
 64	  6	124.0	17.0	 16
 65	  6	111.0	10.8	 16
 66	  6	7454.0	556.6	 16
 67	  6	95.5	16.8	 16
 68	  6	6214.5	765.3	 16
 69	  6	126.3	15.1	 16
 70	  6	123.3	13.5	 16
 71	  6	111.3	15.8	 16
 72	  6	5395.0	844.7	 16
 73	  6	81.3	12.4	 16
 74	  6	98.0	14.6	 16
 75	  6	108.5	19.9	 16
 76	  6	88.0	16.5	 16
 77	  6	104.8	16.2	 16
 78	  6	108.3	14.1	 16
 79	  6	77.3	10.1	 16
 80	  6	5679.0	1244.0	 20
 81	  6	119.3	13.3	 16
 82	  6	102.5	18.3	 16
 83	  6	125.8	19.6	 16
 84	  6	7216.0	1478.7	 16
 85	  6	107.3	63.8	 16
 86	  6	106.8	13.3	 16
 87	  6	6171.3	485.6	 16
 88	  6	6260.3	1237.3	 16
 89	  6	112.3	22.3	 16
 90	  6	106.3	15.8	 16
 91	  6	73.5	15.7	 16
 92	  6	5562.0	1065.7	 16
 93	  6	113.0	20.6	 16
 94	  6	115.3	17.6	 16
 95	  6	6283.3	1337.1	 16
 96	  6	98.3	11.7	 16
 97	  6	79.3	13.7	 16
 98	  6	6150.8	1284.2	 16
 99	  6	127.5	18.1	 16
100	  6	117.3	21.8	 16
101	  6	6041.5	1487.4	 16
102	  6	107.8	14.9	 16
103	  6	71.3	10.7	 16
104	  6	116.8	20.7	 16
105	  6	5946.0	1594.5	 16
106	  6	144.3	22.6	 16
107	  6	6112.0	1061.0	 16
108	  6	121.3	18.7	 16
109	  6	68.5	11.2	 16
110	  6	72.3	8.8	 16
111	  6	95.0	14.9	 16
112	  6	113.5	14.9	 16
113	  6	96.5	15.4	 16
114	  6	87.3	17.5	 16
115	  6	319.0	44.5	 16
116	  6	152.5	24.9	 16
117	  6	148.3	16.0	 16
118	  6	709.0	161.8	 16
119	  6	248.8	50.2	 16
120	  6	111.5	13.2	 16
121	  6	108.0	16.2	 16
122	  6	74.5	11.3	 16
123	  6	78.5	11.3	 16
124	  6	72.0	7.5	 16
125	  6	75.0	33.6	 16
126	  6	117.5	24.9	 16
127	  6	113.8	13.3	 16
128	  6	275.3	57.5	 16
129	  6	214.5	31.7	 16
130	  6	213.3	31.2	 16
131	  6	435.0	32.8	 16
132	  6	74.3	12.5	 16
133	  6	196.3	21.4	 16
134	  6	123.8	15.1	 16
135	  6	102.5	14.3	 16
136	  6	91.5	15.2	 16
137	  6	87.0	16.3	 16
138	  6	69.0	16.0	 16
139	  6	358.0	49.3	 16
140	  6	71.0	13.9	 16
141	  6	113.5	21.1	 16
142	  6	74.3	12.9	 16
143	  6	206.0	29.0	 16
144	  6	101.3	11.3	 16
145	  6	92.3	15.0	 16
146	  6	148.3	19.2	 16
147	  6	334.8	45.9	 16
148	  6	95.0	20.5	 16
149	  6	61.5	16.9	 16
150	  6	112.5	17.6	 16
151	  6	96.8	10.0	 16
152	  6	173.0	30.2	 16
153	  6	136.8	24.5	 16
154	  6	115.8	24.2	 16
155	  6	139.5	18.4	 16
156	  6	124.8	14.5	 16
157	  6	212.8	25.6	 16
158	  6	159.8	29.9	 16
159	  6	205.0	29.5	 16
160	  6	179.3	21.7	 16
161	  6	182.0	25.3	 16
162	  6	179.3	21.6	 16
163	  6	248.5	22.6	 16
164	  6	240.0	24.1	 16
165	  6	147.8	30.0	 16
166	  6	157.0	16.8	 16
167	  6	99.3	17.9	 16
168	  6	90.3	18.9	 16
169	  6	138.5	17.4	 16
170	  6	101.3	31.1	 16
171	  6	274.3	34.1	 16
172	  6	115.5	22.5	 16
173	  6	73.3	12.3	 16
174	  6	189.5	38.5	 16
175	  6	84.3	12.4	 16
176	  6	63.5	14.8	 16
177	  6	57.3	10.3	 16
178	  6	76.5	15.8	 16
179	  6	74.3	13.1	 16
180	  6	256.5	39.9	 16
181	  6	134.3	24.6	 16
182	  6	150.3	31.8	 16
183	  6	116.3	22.0	 16
184	  6	65.8	13.9	 16
185	  6	203.5	25.0	 16
186	  6	122.5	22.7	 16
187	  6	96.0	21.9	 16
188	  6	110.3	18.1	 16
189	  6	112.0	22.7	 16
190	  6	114.5	16.8	 16
191	  6	71.0	17.8	 16
192	  6	131.3	15.8	 16
193	  6	86.0	13.2	 16
194	  6	134.3	15.3	 16
195	  6	103.8	20.9	 16
196	  6	179.3	26.3	 16
197	  6	218.3	26.0	 16
198	  6	302.3	35.7	 16
199	  6	223.3	35.4	 20
200	  6	375.8	57.0	 16
201	  6	185.8	25.0	 16
202	  6	177.0	24.1	 16
203	  6	93.3	18.3	 16
204	  6	78.8	17.1	 16
205	  6	65.3	13.7	 16
206	  6	141.5	61.0	 16
207	  6	69.5	15.3	 16
208	  6	62.3	13.0	 16
209	  6	142.8	21.0	 16
210	  6	134.5	25.9	 16
211	  6	98.5	17.4	 16
212	  6	122.3	20.8	 16
213	  6	122.8	23.0	 16
214	  6	249.0	38.0	 16
215	  6	101.0	18.4	 16
216	  6	102.8	15.5	 16
217	  6	286.0	45.0	 16
218	  6	73.3	12.4	 16
219	  6	63.0	11.7	 16
220	  6	67.5	10.8	 16
221	  6	111.3	20.4	 16
222	  6	99.5	21.9	 16
223	  6	139.5	24.5	 16
224	  6	98.8	19.3	 16
225	  6	65.5	9.7	 16
226	  6	71.0	10.4	 16
227	  6	125.5	28.5	 16
228	  6	97.5	14.1	 16
229	  6	309.3	49.7	 16
230	  6	81.3	15.0	 16
231	  6	87.5	13.7	 16
232	  6	73.3	17.0	 16
233	  6	105.5	22.3	 16
234	  6	59.3	9.8	 16
235	  6	202.0	34.1	 16
236	  6	73.3	11.9	 16
237	  6	74.5	30.2	 16
238	  6	118.8	20.7	 16
239	  6	201.3	34.9	 16
240	  6	75.3	11.8	 16
241	  6	68.3	14.0	 16
242	  6	100.3	18.5	 16
243	  6	142.0	23.2	 16
244	  6	106.0	15.3	 16
245	  6	162.0	30.1	 16
246	  6	111.3	13.7	 16
247	  6	71.8	11.5	 16
248	  6	105.5	18.6	 16
249	  6	94.3	13.8	 16
250	  6	62.5	15.6	 16
251	  6	873.8	181.9	 16
252	  6	68.0	12.6	 16
253	  6	65.0	12.2	 16
254	  6	68.3	8.7	 16
255	  6	160.5	23.0	 16
256	  6	383.3	63.7	 16
257	  6	80.0	14.9	 16
258	  6	69.5	25.9	 16
259	  6	97.3	93.8	 16
260	  6	68.8	14.1	 16
261	  6	67.3	12.1	 16
262	  6	98.0	21.4	 16
263	  6	76.5	9.8	 16
264	  6	73.3	11.3	 16
265	  6	85.3	21.2	 16
266	  6	60.5	11.1	 16
267	  6	71.3	10.8	 16
268	  6	95.8	13.7	 16
269	  6	103.3	16.5	 16
270	  6	154.3	160.7	 16
271	  6	247.5	55.3	 16
272	  6	198.0	27.1	 16
273	  6	92.8	14.6	 16
274	  6	77.5	13.4	 16
275	  6	75.0	13.0	 16
276	  6	69.8	19.0	 16
277	  6	75.0	13.4	 16
278	  6	81.5	15.9	 16
279	  6	61.3	7.9	 16
280	  6	117.0	22.2	 16
281	  6	614.8	68.7	 16
282	  6	580.3	52.1	 16
283	  6	323.5	33.4	 16
284	  6	136.3	19.3	 16
285	  6	350.0	44.2	 16
286	  6	68.5	17.2	 16
287	  6	86.0	14.4	 16
288	  6	288.5	30.0	 16
289	  6	222.5	23.6	 16
290	  6	198.3	57.2	 16
291	  6	97.8	17.7	 16
292	  6	84.3	13.3	 16
293	  6	113.8	20.6	 16
294	  6	148.0	36.4	 16
295	  6	95.3	13.0	 16
296	  6	102.3	16.4	 16
297	  6	181.8	178.6	 16
298	  6	77.3	14.3	 16
299	  6	74.5	11.9	 16
300	  6	835.0	113.3	 16
301	  6	73.8	18.4	 16
302	  6	85.8	20.7	 16
303	  6	316.3	54.1	 16
304	  6	109.3	19.8	 16
305	  6	82.5	13.4	 16
306	  6	340.3	40.2	 16
307	  6	76.3	13.8	 16
308	  6	66.8	10.2	 16
309	  6	103.5	9.7	 16
310	  6	67.8	16.0	 16
311	  6	175.3	32.1	 16
312	  6	75.5	11.4	 16
313	  6	89.5	16.5	 16
314	  6	244.8	26.2	 16
315	  6	70.3	8.7	 16
316	  6	114.3	16.6	 16
317	  6	78.5	13.8	 16
318	  6	81.0	13.2	 20
319	  6	83.3	16.0	 16
320	  6	67.5	13.5	 16
321	  6	58.0	10.5	 16
322	  6	58.3	6.7	 16
323	  6	88.5	21.3	 16
324	  6	189.3	39.6	 16
325	  6	213.0	36.5	 16
326	  6	156.3	15.2	 16
327	  6	119.5	20.9	 16
328	  6	150.8	23.9	 16
329	  6	630.0	82.1	 16
330	  6	318.5	40.2	 16
331	  6	104.0	17.9	 16
332	  6	98.5	15.6	 16
333	  6	293.3	50.9	 16
334	  6	87.0	23.2	 16
335	  6	87.5	16.4	 16
336	  6	75.0	11.1	 16
337	  6	124.3	20.1	 16
338	  6	83.5	11.8	 16
339	  6	78.0	13.1	 16
340	  6	184.3	53.0	 16
341	  6	153.5	20.3	 16
342	  6	71.3	10.4	 16
343	  6	58.8	6.5	 16
344	  6	101.5	12.1	 16
345	  6	81.0	15.4	 16
346	  6	83.3	12.3	 16
347	  6	1088.5	194.5	 16
348	  6	65.8	10.8	 16
349	  6	104.3	16.8	 16
350	  6	160.8	28.0	 16
351	  6	731.5	50.9	 16
352	  6	703.3	63.2	 16
353	  6	81.0	15.5	 16
354	  6	75.0	15.6	 16
355	  6	1018.5	176.6	 16
356	  6	82.0	26.9	 16
357	  6	99.8	19.3	 16
358	  6	92.5	16.0	 16
359	  6	92.3	17.7	 16
360	  6	79.0	10.4	 16
361	  6	177.0	17.8	 16
362	  6	278.5	42.5	 16
363	  6	63.3	12.0	 16
364	  6	54.8	10.4	 16
365	  6	71.3	12.6	 16
366	  6	63.0	8.6	 16
367	  6	339.5	130.2	 16
368	  6	85.3	14.1	 16
369	  6	85.0	14.0	 16
370	  6	107.5	19.9	 16
371	  6	416.5	40.1	 16
372	  6	166.8	26.7	 16
373	  6	253.3	43.3	 16
374	  6	161.3	14.2	 16
375	  6	139.5	34.5	 16
376	  6	91.0	12.0	 16
377	  6	91.0	18.2	 16
378	  6	110.3	19.2	 16
379	  6	164.3	23.4	 16
380	  6	164.3	26.3	 16
381	  6	131.8	18.8	 16
382	  6	155.8	25.2	 16
383	  6	408.3	38.7	 16
384	  6	63.5	13.4	 16
385	  6	104.8	13.8	 16
386	  6	101.0	20.1	 16
387	  6	149.3	16.7	 16
388	  6	140.5	18.5	 16
389	  6	774.0	88.6	 16
390	  6	122.5	20.6	 16
391	  6	79.3	11.7	 16
392	  6	245.8	32.4	 16
393	  6	76.8	12.3	 16
394	  6	91.0	20.2	 16
395	  6	62.8	7.9	 16
396	  6	108.8	17.9	 16
397	  6	123.5	17.4	 16
398	  6	157.5	28.4	 16
399	  6	78.3	12.3	 16
400	  6	195.8	26.2	 16
401	  6	164.0	20.8	 16
402	  6	92.5	20.9	 16
403	  6	68.3	12.0	 16
404	  6	114.0	17.1	 16
405	  6	69.3	11.0	 16
406	  6	112.8	21.1	 16
407	  6	216.3	31.3	 16
408	  6	143.8	29.3	 16
409	  6	85.8	14.2	 16
410	  6	161.0	30.1	 16
411	  6	218.0	26.3	 16
412	  6	119.8	82.9	 16
413	  6	102.0	14.7	 16
414	  6	112.0	24.2	 16
415	  6	1261.0	259.2	 16
416	  6	1048.0	225.4	 16
417	  6	84.3	15.3	 16
418	  6	169.8	12.2	 16
419	  6	181.0	22.2	 16
420	  6	66.3	10.9	 16
421	  6	61.3	16.1	 16
422	  6	69.3	22.4	 16
423	  6	85.0	13.4	 16
424	  6	68.0	11.0	 16
425	  6	159.5	20.0	 16
426	  6	79.0	11.2	 16
427	  6	59.5	9.7	 16
428	  6	106.3	24.7	 16
429	  6	107.5	15.8	 16
430	  6	72.0	11.4	 16
431	  6	86.3	18.4	 16
432	  6	206.3	19.8	 16
433	  6	127.3	16.7	 16
434	  6	108.0	20.4	 16
435	  6	79.3	13.6	 16
436	  6	62.0	11.8	 20
437	  6	79.8	10.8	 16
438	  6	76.0	12.5	 16
439	  6	227.3	27.3	 16
440	  6	186.5	51.2	 16
441	  6	145.5	25.5	 16
442	  6	291.5	33.5	 16
443	  6	155.0	24.1	 16
444	  6	144.3	17.4	 16
445	  6	157.3	18.2	 16
446	  6	153.5	26.4	 16
447	  6	70.8	13.3	 16
448	  6	906.0	151.1	 16
449	  6	298.0	54.4	 16
450	  6	286.3	28.3	 16
451	  6	266.3	58.1	 16
452	  6	176.0	29.9	 16
453	  6	99.3	10.2	 16
454	  6	382.3	74.5	 16
455	  6	71.5	11.6	 16
456	  6	82.0	14.0	 16
457	  6	111.8	26.8	 16
458	  6	301.8	46.0	 16
459	  6	138.0	21.0	 16
460	  6	65.3	11.7	 16
461	  6	128.5	21.7	 16
462	  6	72.3	9.8	 16
463	  6	153.3	24.9	 16
464	  6	1249.3	164.4	 16
465	  6	505.0	89.0	 16
466	  6	137.3	29.0	 16
467	  6	89.0	21.1	 16
468	  6	90.5	16.2	 16
469	  6	176.8	17.3	 16
470	  6	121.5	20.7	 16
471	  6	127.3	25.9	 16
472	  6	188.0	29.7	 16
473	  6	139.3	25.1	 16
474	  6	80.0	14.5	 16
475	  6	64.5	9.6	 16
476	  6	70.3	11.5	 16
477	  6	102.8	18.6	 16
478	  6	112.8	28.3	 16
479	  6	103.0	18.3	 16
480	  6	90.3	16.9	 16
481	  6	96.0	15.8	 16
482	  6	131.3	19.4	 16
483	  6	72.5	10.5	 16
484	  6	121.0	19.5	 16
485	  6	330.3	52.1	 16
486	  6	115.0	20.1	 16
487	  6	208.3	35.9	 16
488	  6	91.0	27.6	 16
489	  6	98.3	15.2	 16
490	  6	89.3	15.1	 16
491	  6	106.3	19.9	 16
492	  6	69.8	11.6	 16
493	  6	67.3	13.0	 16
494	  6	62.3	11.3	 16
495	  6	228.3	24.2	 16
496	  6	592.3	60.3	 16
497	  6	101.5	15.4	 16
498	  6	162.0	24.7	 16
499	  6	75.3	16.0	 16
500	  6	113.8	17.1	 16
501	  6	220.3	26.2	 16
502	  6	84.5	22.3	 16
503	  6	498.5	67.8	 16
504	  6	73.5	12.6	 16
505	  6	220.3	30.8	 16
506	  6	78.3	18.1	 16
507	  6	77.0	11.1	 16
508	  6	417.8	50.6	 16
509	  6	2098.0	277.3	 16
510	  6	115.5	16.9	 16
511	  6	148.8	18.1	 16
512	  6	76.0	10.7	 16
513	  6	79.3	11.3	 16
514	  6	63.0	12.1	 16
515	  6	69.0	10.2	 16
516	  6	63.3	12.5	 16
517	  6	120.0	16.2	 16
518	  6	108.8	20.3	 16
519	  6	78.3	14.0	 16
520	  6	69.8	11.5	 16
521	  6	228.0	36.0	 16
522	  6	89.3	11.6	 16
523	  6	320.0	26.9	 16
524	  6	600.8	65.9	 16
525	  6	70.5	13.8	 16
526	  6	1201.3	129.5	 16
527	  6	97.0	22.7	 16
528	  6	77.8	9.9	 16
529	  6	184.0	40.7	 16
530	  6	151.3	23.1	 16
531	  6	175.0	23.0	 16
532	  6	155.8	16.5	 16
533	  6	204.0	37.0	 16
534	  6	136.5	29.1	 16
535	  6	182.8	28.1	 16
536	  6	577.8	55.9	 16
537	  6	124.3	20.3	 16
538	  6	3200.5	325.9	 16
539	  6	484.5	57.3	 16
540	  6	57.8	7.7	 16
541	  6	151.5	28.6	 16
542	  6	146.3	18.2	 16
543	  6	67.5	15.1	 16
544	  6	184.0	34.5	 16
545	  6	264.0	30.8	 16
546	  6	304.5	27.8	 16
547	  6	311.0	35.6	 16
548	  6	227.8	36.5	 16
549	  6	205.0	27.0	 16
550	  6	123.0	18.2	 16
551	  6	126.0	19.6	 16
552	  6	62.3	9.8	 16
553	  6	57.5	10.3	 16
554	  6	60.3	10.0	 16
555	  6	81.3	18.5	 20
556	  6	97.8	12.1	 16
557	  6	75.3	13.0	 16
558	  6	113.5	23.0	 16
559	  6	98.8	17.8	 16
560	  6	254.0	31.9	 16
561	  6	95.3	15.1	 16
562	  6	2346.3	427.0	 16
563	  6	92.5	16.9	 16
564	  6	91.3	15.9	 16
565	  6	124.0	21.3	 16
566	  6	464.3	31.3	 16
567	  6	207.8	43.5	 16
568	  6	80.3	10.1	 16
569	  6	119.0	21.8	 16
570	  6	524.5	74.0	 16
571	  6	89.3	14.7	 16
572	  6	88.3	9.9	 16
573	  6	87.3	12.9	 16
574	  6	100.8	20.0	 16
575	  6	79.0	9.2	 16
576	  6	118.5	20.1	 16
577	  6	61.8	19.3	 16
578	  6	72.8	11.4	 16
579	  6	1152.5	150.5	 16
580	  6	244.3	25.0	 16
581	  6	507.0	53.4	 16
582	  6	653.8	91.1	 16
583	  6	335.8	59.8	 16
584	  6	166.0	29.7	 16
585	  6	169.8	25.5	 16
586	  6	130.5	17.0	 16
587	  6	165.3	28.4	 16
588	  6	79.0	12.5	 16
589	  6	74.3	19.3	 16
590	  6	66.0	11.0	 16
591	  6	80.5	14.9	 16
592	  6	324.8	41.4	 16
593	  6	206.0	19.9	 16
594	  6	164.5	24.2	 16
595	  6	89.0	13.0	 16
596	  6	84.0	11.4	 16
597	  6	115.0	20.3	 16
598	  6	112.8	19.1	 16
599	  6	54.8	7.2	 16
600	  6	75.3	12.1	 16
601	  6	130.8	23.9	 16
602	  6	138.8	34.6	 16
603	  6	70.3	9.9	 16
604	  6	84.3	18.6	 16
605	  6	60.3	15.8	 16
606	  6	79.8	14.2	 16
607	  6	68.5	12.3	 16
608	  6	67.5	9.0	 16
609	  6	150.5	28.1	 16
610	  6	62.3	14.6	 16
611	  6	61.8	9.3	 16
612	  6	84.0	17.1	 16
613	  6	84.8	14.6	 16
614	  6	144.3	13.6	 16
615	  6	104.3	19.3	 16
616	  6	95.0	14.2	 16
617	  6	117.3	22.5	 16
618	  6	94.0	15.5	 16
619	  6	68.5	9.1	 16
620	  6	60.0	9.8	 16
621	  6	70.5	13.6	 16
622	  6	63.3	15.1	 16
623	  6	184.8	31.6	 16
624	  6	120.5	19.5	 16
625	  6	104.0	16.2	 16
626	  6	1320.8	113.2	 16
627	  6	131.5	18.6	 16
628	  6	66.5	11.8	 16
629	  6	159.3	31.7	 16
630	  6	64.0	11.3	 16
631	  6	61.0	11.8	 16
632	  6	106.3	23.1	 16
633	  6	155.0	26.4	 16
634	  6	111.5	27.7	 16
635	  6	98.3	13.8	 16
636	  6	79.5	13.1	 16
637	  6	348.0	41.3	 16
638	  6	686.3	68.4	 16
639	  6	83.0	10.7	 16
640	  6	76.0	13.5	 16
641	  6	77.0	20.1	 16
642	  6	61.3	11.3	 16
643	  6	108.0	41.4	 16
644	  6	145.5	29.6	 16
645	  6	149.0	21.7	 16
646	  6	72.0	12.3	 16
647	  6	62.3	9.4	 16
648	  6	245.5	44.0	 16
649	  6	88.5	15.9	 16
650	  6	100.3	21.0	 16
651	  6	395.0	124.3	 16
652	  6	143.5	24.1	 16
653	  6	92.0	15.1	 16
654	  6	128.3	19.1	 16
655	  6	293.3	28.3	 16
656	  6	292.3	39.7	 16
657	  6	906.8	72.7	 16
658	  6	110.8	24.8	 16
659	  6	316.8	37.6	 16
660	  6	210.5	30.6	 16
661	  6	147.8	17.9	 16
662	  6	94.8	15.7	 16
663	  6	83.8	14.2	 16
664	  6	1579.8	187.8	 16
665	  6	183.8	29.5	 16
666	  6	251.8	28.5	 16
667	  6	102.5	16.3	 16
668	  6	181.0	25.8	 16
669	  6	106.3	22.1	 16
670	  6	72.8	15.2	 16
671	  6	124.3	21.3	 16
672	  6	154.8	18.6	 16
673	  6	80.0	12.4	 16
674	  6	126.3	22.6	 20
675	  6	66.5	14.2	 16
676	  6	89.5	15.4	 16
677	  6	69.3	12.3	 16
678	  6	78.3	11.3	 16
679	  6	401.0	73.3	 16
680	  6	67.8	12.4	 16
681	  6	226.3	19.0	 16
682	  6	104.5	14.6	 16
683	  6	98.3	13.1	 16
684	  6	85.5	17.0	 16
685	  6	64.5	14.5	 16
686	  6	71.8	15.6	 16
687	  6	70.0	11.0	 16
688	  6	1421.5	206.9	 16
689	  6	218.0	26.6	 16
690	  6	142.5	23.8	 16
691	  6	243.5	46.1	 16
692	  6	124.3	15.1	 16
693	  6	168.5	23.4	 16
694	  6	94.3	19.4	 16
695	  6	127.0	15.1	 16
696	  6	114.5	16.5	 16
697	  6	127.0	12.5	 16
698	  6	70.0	13.7	 16
699	  6	81.0	11.5	 16
700	  6	67.8	14.8	 16
701	  6	96.0	10.8	 16
702	  6	89.5	13.6	 16
703	  6	167.8	22.2	 16
704	  6	78.3	9.3	 16
705	  6	141.5	21.7	 16
706	  6	168.5	16.5	 16
707	  6	185.0	25.4	 16
708	  6	63.5	12.1	 16
709	  6	97.3	16.1	 16
710	  6	134.5	23.8	 16
711	  6	7185.3	558.0	 16
  0	  7	113.0	18.6	 16
  1	  7	130.5	25.3	 16
  2	  7	140.3	20.5	 16
  3	  7	191.8	29.1	 16
  4	  7	102.3	15.3	 16
  5	  7	129.5	23.1	 16
  6	  7	82.8	10.9	 16
  7	  7	106.3	18.3	 16
  8	  7	472.0	103.0	 16
  9	  7	376.3	52.0	 16
 10	  7	177.5	26.0	 16
 11	  7	75.5	9.6	 16
 12	  7	6475.3	717.2	 16
 13	  7	127.5	15.1	 16
 14	  7	117.3	14.2	 16
 15	  7	121.3	15.1	 16
 16	  7	110.5	12.3	 16
 17	  7	86.0	9.8	 16
 18	  7	118.0	18.1	 16
 19	  7	5809.0	724.8	 16
 20	  7	6490.8	794.2	 16
 21	  7	6449.8	989.0	 16
 22	  7	127.3	19.0	 16
 23	  7	94.5	15.7	 16
 24	  7	5966.0	1184.1	 16
 25	  7	129.8	19.1	 16
 26	  7	6149.5	1152.7	 16
 27	  7	6358.5	1342.3	 16
 28	  7	121.3	19.0	 16
 29	  7	85.3	16.3	 16
 30	  7	131.3	22.2	 16
 31	  7	5932.0	1387.4	 16
 32	  7	6522.8	1569.9	 16
 33	  7	6786.8	1770.4	 16
 34	  7	132.0	20.8	 16
 35	  7	86.8	13.2	 16
 36	  7	6297.3	995.9	 16
 37	  7	120.3	14.4	 16
 38	  7	113.3	19.4	 16
 39	  7	103.3	12.4	 16
 40	  7	132.3	16.8	 16
 41	  7	82.3	14.7	 16
 42	  7	6635.8	1009.2	 16
 43	  7	131.3	18.6	 16
 44	  7	6127.0	699.8	 16
 45	  7	6385.5	1107.3	 16
 46	  7	116.8	19.2	 16
 47	  7	76.0	10.4	 16
 48	  7	124.0	20.3	 16
 49	  7	113.3	11.1	 16
 50	  7	4879.3	871.1	 16
 51	  7	118.8	18.3	 16
 52	  7	124.5	17.8	 16
 53	  7	86.5	12.5	 16
 54	  7	6314.0	1429.1	 16
 55	  7	5776.5	1306.6	 16
 56	  7	5703.5	1354.6	 16
 57	  7	119.5	22.7	 16
 58	  7	109.5	19.0	 16
 59	  7	76.5	9.2	 16
 60	  7	82.0	11.4	 16
 61	  7	87.8	14.0	 16
 62	  7	6151.3	599.6	 16
 63	  7	127.0	13.6	 16
 64	  7	119.8	21.3	 16
 65	  7	130.8	18.7	 16
 66	  7	8212.5	684.4	 16
 67	  7	104.5	16.4	 16
 68	  7	6338.3	546.2	 16
 69	  7	128.0	20.5	 16
 70	  7	116.5	12.0	 16
 71	  7	119.0	18.3	 16
 72	  7	116.3	17.9	 16
 73	  7	77.8	21.5	 16
 74	  7	98.3	12.1	 16
 75	  7	122.0	19.2	 16
 76	  7	97.3	10.6	 16
 77	  7	106.3	14.8	 16
 78	  7	111.8	18.9	 16
 79	  7	81.3	15.3	 16
 80	  7	5638.5	331.5	 16
 81	  7	123.3	24.7	 16
 82	  7	116.8	19.8	 16
 83	  7	109.0	19.6	 16
 84	  7	7355.8	1450.0	 20
 85	  7	88.0	11.5	 16
 86	  7	113.0	22.8	 16
 87	  7	124.3	14.4	 16
 88	  7	6103.8	1236.6	 16
 89	  7	116.3	17.4	 16
 90	  7	107.3	15.1	 16
 91	  7	72.0	11.1	 16
 92	  7	108.5	15.8	 16
 93	  7	109.5	20.0	 16
 94	  7	111.3	19.8	 16
 95	  7	6664.5	1179.8	 16
 96	  7	105.5	13.7	 16
 97	  7	69.0	8.8	 16
 98	  7	102.8	14.6	 16
 99	  7	104.3	22.9	 16
100	  7	108.3	17.6	 16
101	  7	6481.8	1090.6	 16
102	  7	102.5	15.8	 16
103	  7	85.5	19.6	 16
104	  7	118.0	17.9	 16
105	  7	6891.3	1013.1	 16
106	  7	119.3	16.9	 16
107	  7	7285.3	1117.6	 16
108	  7	128.8	28.1	 16
109	  7	67.5	13.0	 16
110	  7	71.0	11.0	 16
111	  7	88.5	16.4	 16
112	  7	174.3	34.6	 16
113	  7	92.5	13.7	 16
114	  7	83.3	8.8	 16
115	  7	100.5	18.6	 16
116	  7	348.8	63.7	 16
117	  7	153.8	28.6	 16
118	  7	122.0	11.4	 16
119	  7	269.3	20.9	 16
120	  7	254.8	35.0	 16
121	  7	491.0	55.0	 16
122	  7	190.8	37.6	 16
123	  7	427.3	102.2	 16
124	  7	126.8	27.5	 16
125	  7	465.5	75.6	 16
126	  7	8424.0	1704.0	 16
127	  7	8004.0	1757.6	 16
128	  7	7246.8	1862.9	 16
129	  7	249.0	39.1	 16
130	  7	114.3	26.0	 16
131	  7	2630.0	423.2	 16
132	  7	143.0	21.5	 16
133	  7	1959.3	156.8	 16
134	  7	888.5	74.1	 16
135	  7	415.5	55.8	 16
136	  7	411.5	50.7	 16
137	  7	147.5	24.7	 16
138	  7	116.0	17.3	 16
139	  7	200.5	42.6	 16
140	  7	59.8	7.8	 16
141	  7	81.0	14.8	 16
142	  7	105.5	15.5	 16
143	  7	304.3	66.3	 16
144	  7	181.5	33.2	 16
145	  7	779.3	183.8	 16
146	  7	86.3	13.5	 16
147	  7	95.3	17.7	 16
148	  7	112.5	20.6	 16
149	  7	94.5	16.7	 16
150	  7	87.5	18.2	 16
151	  7	95.5	17.4	 16
152	  7	220.8	51.7	 16
153	  7	217.3	58.9	 16
154	  7	232.8	31.7	 16
155	  7	93.8	15.2	 16
156	  7	991.3	75.2	 16
157	  7	1039.8	63.4	 16
158	  7	192.5	33.5	 16
159	  7	186.0	20.6	 16
160	  7	142.3	20.2	 16
161	  7	163.3	26.8	 16
162	  7	107.3	17.1	 16
163	  7	109.0	17.8	 16
164	  7	112.0	15.7	 16
165	  7	201.0	36.5	 16
166	  7	98.3	15.4	 16
167	  7	179.3	28.1	 16
168	  7	125.8	18.1	 16
169	  7	249.5	39.1	 16
170	  7	296.5	47.0	 16
171	  7	240.8	33.3	 16
172	  7	80.0	16.7	 16
173	  7	94.0	16.1	 16
174	  7	1170.8	255.0	 16
175	  7	100.0	18.3	 16
176	  7	133.5	23.6	 16
177	  7	69.3	13.3	 16
178	  7	84.3	12.1	 16
179	  7	92.0	14.4	 16
180	  7	262.3	38.6	 16
181	  7	104.8	17.0	 16
182	  7	506.3	58.8	 16
183	  7	67.3	10.9	 16
184	  7	82.0	12.9	 16
185	  7	90.5	15.2	 16
186	  7	138.0	20.5	 16
187	  7	114.3	29.3	 16
188	  7	129.0	21.7	 16
189	  7	208.3	32.6	 16
190	  7	152.5	19.2	 16
191	  7	94.0	21.4	 16
192	  7	139.8	22.4	 16
193	  7	143.0	19.4	 16
194	  7	169.3	26.2	 16
195	  7	100.8	16.2	 16
196	  7	87.3	12.0	 16
197	  7	91.0	56.7	 16
198	  7	105.0	23.5	 16
199	  7	1724.5	412.1	 16
200	  7	335.5	50.3	 16
201	  7	152.5	37.4	 16
202	  7	103.5	17.3	 20
203	  7	154.5	27.4	 16
204	  7	209.0	38.9	 16
205	  7	64.3	86.4	 16
206	  7	147.8	23.9	 16
207	  7	103.3	21.5	 16
208	  7	116.5	16.3	 16
209	  7	79.0	14.7	 16
210	  7	71.3	7.4	 16
211	  7	104.3	16.3	 16
212	  7	165.8	28.3	 16
213	  7	289.3	43.7	 16
214	  7	227.0	61.1	 16
215	  7	211.8	46.5	 16
216	  7	115.0	18.4	 16
217	  7	211.5	36.1	 16
218	  7	122.8	21.8	 16
219	  7	69.5	10.3	 16
220	  7	171.0	29.1	 16
221	  7	189.5	32.1	 16
222	  7	688.0	175.9	 16
223	  7	97.5	13.8	 16
224	  7	72.0	12.4	 16
225	  7	140.5	16.0	 16
226	  7	219.5	38.9	 16
227	  7	185.5	27.6	 16
228	  7	169.5	24.5	 16
229	  7	77.0	12.5	 16
230	  7	82.3	17.0	 16
231	  7	673.3	161.3	 16
232	  7	136.5	21.9	 16
233	  7	113.5	25.9	 16
234	  7	79.5	9.4	 16
235	  7	111.0	32.5	 16
236	  7	239.0	40.7	 16
237	  7	72.5	16.2	 16
238	  7	73.8	7.7	 16
239	  7	706.3	102.3	 16
240	  7	72.0	18.4	 16
241	  7	101.5	20.9	 16
242	  7	373.0	92.9	 16
243	  7	244.5	47.6	 16
244	  7	1040.8	259.0	 16
245	  7	72.5	12.5	 16
246	  7	75.3	15.2	 16
247	  7	101.8	18.4	 16
248	  7	97.3	13.0	 16
249	  7	114.0	15.3	 16
250	  7	72.3	9.3	 16
251	  7	128.8	22.2	 16
252	  7	331.5	46.3	 16
253	  7	71.8	15.3	 16
254	  7	144.5	26.0	 16
255	  7	75.8	12.9	 16
256	  7	67.3	11.6	 16
257	  7	108.3	15.7	 16
258	  7	86.3	128.6	 16
259	  7	157.0	17.5	 16
260	  7	169.3	16.2	 16
261	  7	217.0	33.9	 16
262	  7	83.0	14.8	 16
263	  7	3772.3	704.8	 16
264	  7	109.0	10.3	 16
265	  7	74.0	15.4	 16
266	  7	83.0	15.0	 16
267	  7	565.5	133.6	 16
268	  7	612.0	144.6	 16
269	  7	77.5	15.2	 16
270	  7	63.5	13.4	 16
271	  7	136.0	28.9	 16
272	  7	345.8	72.5	 16
273	  7	164.3	23.1	 16
274	  7	142.5	19.2	 16
275	  7	105.3	18.0	 16
276	  7	204.5	34.5	 16
277	  7	131.3	17.6	 16
278	  7	354.0	78.8	 16
279	  7	97.3	18.4	 16
280	  7	79.0	14.9	 16
281	  7	98.5	17.4	 16
282	  7	2398.8	400.3	 16
283	  7	99.5	14.6	 16
284	  7	160.5	33.4	 16
285	  7	190.8	40.0	 16
286	  7	89.3	19.4	 16
287	  7	497.8	115.3	 16
288	  7	218.8	28.5	 16
289	  7	203.3	27.0	 16
290	  7	131.8	20.2	 16
291	  7	254.8	51.2	 16
292	  7	69.0	10.4	 16
293	  7	144.3	24.2	 16
294	  7	124.5	20.2	 16
295	  7	103.0	13.1	 16
296	  7	87.3	19.9	 16
297	  7	110.3	14.1	 16
298	  7	205.0	22.2	 16
299	  7	185.3	30.3	 16
300	  7	217.3	27.9	 16
301	  7	864.3	109.0	 16
302	  7	84.5	20.1	 16
303	  7	235.0	30.4	 16
304	  7	109.5	17.4	 16
305	  7	77.0	10.0	 16
306	  7	794.5	88.1	 16
307	  7	84.5	10.6	 16
308	  7	211.3	30.9	 16
309	  7	87.5	17.0	 16
310	  7	105.5	12.8	 16
311	  7	178.5	15.7	 16
312	  7	190.5	39.9	 16
313	  7	254.3	54.4	 16
314	  7	222.8	15.1	 16
315	  7	262.0	37.7	 16
316	  7	508.5	111.2	 16
317	  7	155.3	34.3	 16
318	  7	88.8	16.8	 16
319	  7	125.8	20.4	 16
320	  7	67.0	9.0	 16
321	  7	572.8	130.1	 20
322	  7	149.8	22.1	 16
323	  7	128.0	17.2	 16
324	  7	233.5	43.1	 16
325	  7	402.3	69.3	 16
326	  7	1442.5	302.5	 16
327	  7	225.0	33.3	 16
328	  7	79.5	14.4	 16
329	  7	175.3	74.3	 16
330	  7	430.8	76.6	 16
331	  7	135.5	24.2	 16
332	  7	145.5	31.4	 16
333	  7	7194.3	703.5	 16
334	  7	6088.3	1318.8	 16
335	  7	153.3	23.5	 16
336	  7	85.5	14.3	 16
337	  7	89.0	11.4	 16
338	  7	86.3	15.7	 16
339	  7	124.3	19.6	 16
340	  7	130.3	30.6	 16
341	  7	79.5	19.9	 16
342	  7	186.8	44.2	 16
343	  7	72.3	9.7	 16
344	  7	119.3	16.3	 16
345	  7	145.5	32.8	 16
346	  7	192.5	25.1	 16
347	  7	315.5	40.0	 16
348	  7	225.3	38.5	 16
349	  7	71.3	14.5	 16
350	  7	95.5	21.7	 16
351	  7	72.3	8.9	 16
352	  7	503.5	64.7	 16
353	  7	126.8	26.7	 16
354	  7	57.0	9.7	 16
355	  7	91.3	11.8	 16
356	  7	148.5	20.2	 16
357	  7	200.3	24.8	 16
358	  7	2121.0	235.4	 16
359	  7	229.8	38.5	 16
360	  7	292.5	47.2	 16
361	  7	88.5	14.2	 16
362	  7	94.0	17.3	 16
363	  7	79.8	14.7	 16
364	  7	59.0	7.8	 16
365	  7	90.3	15.0	 16
366	  7	169.0	26.8	 16
367	  7	184.0	41.3	 16
368	  7	83.8	18.8	 16
369	  7	118.3	22.2	 16
370	  7	215.3	22.3	 16
371	  7	203.5	29.2	 16
372	  7	266.3	29.4	 16
373	  7	194.8	23.8	 16
374	  7	295.0	48.2	 16
375	  7	74.3	13.1	 16
376	  7	92.8	18.2	 16
377	  7	106.0	18.3	 16
378	  7	152.5	26.3	 16
379	  7	554.8	104.9	 16
380	  7	395.8	52.6	 16
381	  7	151.8	25.4	 16
382	  7	166.0	32.3	 16
383	  7	1180.5	81.3	 16
384	  7	129.3	20.3	 16
385	  7	91.3	11.4	 16
386	  7	87.8	13.5	 16
387	  7	162.3	27.6	 16
388	  7	157.8	22.5	 16
389	  7	67.5	13.8	 16
390	  7	82.3	17.8	 16
391	  7	364.3	187.8	 16
392	  7	60.3	10.3	 16
393	  7	69.8	15.5	 16
394	  7	145.3	24.7	 16
395	  7	291.0	37.6	 16
396	  7	564.5	37.1	 16
397	  7	514.8	78.5	 16
398	  7	58.0	12.1	 16
399	  7	63.0	9.4	 16
400	  7	91.8	12.8	 16
401	  7	257.8	32.1	 16
402	  7	619.5	103.4	 16
403	  7	137.3	20.3	 16
404	  7	93.8	15.7	 16
405	  7	61.5	8.7	 16
406	  7	834.8	144.7	 16
407	  7	96.8	16.6	 16
408	  7	90.8	17.5	 16
409	  7	99.0	14.9	 16
410	  7	178.0	90.3	 16
411	  7	171.8	23.7	 16
412	  7	230.3	27.7	 16
413	  7	906.5	167.3	 16
414	  7	75.5	10.1	 16
415	  7	174.5	22.3	 16
416	  7	89.0	19.7	 16
417	  7	166.0	30.3	 16
418	  7	445.3	51.1	 16
419	  7	63.5	13.7	 16
420	  7	61.3	16.7	 16
421	  7	66.5	15.3	 16
422	  7	56.8	11.6	 16
423	  7	144.5	17.7	 16
424	  7	477.5	59.6	 16
425	  7	123.3	20.0	 16
426	  7	326.3	31.5	 16
427	  7	214.8	25.8	 16
428	  7	185.5	28.4	 16
429	  7	61.3	9.4	 16
430	  7	72.0	15.4	 16
431	  7	75.0	17.8	 16
432	  7	239.8	51.1	 16
433	  7	69.3	13.0	 16
434	  7	140.5	23.6	 16
435	  7	164.8	20.3	 16
436	  7	158.3	27.4	 16
437	  7	94.8	13.1	 16
438	  7	156.5	28.0	 16
439	  7	61.5	9.5	 16
440	  7	108.3	30.7	 20
441	  7	345.8	77.9	 16
442	  7	171.5	28.7	 16
443	  7	298.3	72.0	 16
444	  7	204.5	39.3	 16
445	  7	119.0	21.5	 16
446	  7	198.0	32.2	 16
447	  7	371.0	61.1	 16
448	  7	432.0	82.7	 16
449	  7	253.3	31.6	 16
450	  7	354.3	34.6	 16
451	  7	104.3	19.6	 16
452	  7	241.5	35.7	 16
453	  7	346.8	63.0	 16
454	  7	614.3	74.5	 16
455	  7	247.0	23.8	 16
456	  7	182.8	34.9	 16
457	  7	66.3	8.7	 16
458	  7	100.3	17.7	 16
459	  7	170.0	31.0	 16
460	  7	445.0	107.4	 16
461	  7	80.3	21.2	 16
462	  7	717.0	200.4	 16
463	  7	80.3	15.8	 16
464	  7	70.8	13.9	 16
465	  7	73.0	13.1	 16
466	  7	130.8	22.2	 16
467	  7	157.3	27.3	 16
468	  7	80.3	15.2	 16
469	  7	89.0	15.8	 16
470	  7	151.8	26.1	 16
471	  7	129.0	24.6	 16
472	  7	78.0	14.7	 16
473	  7	97.3	19.8	 16
474	  7	64.8	15.9	 16
475	  7	122.8	24.6	 16
476	  7	58.8	11.4	 16
477	  7	183.5	43.6	 16
478	  7	65.3	10.2	 16
479	  7	74.5	12.3	 16
480	  7	74.3	13.1	 16
481	  7	68.5	12.7	 16
482	  7	259.3	66.6	 16
483	  7	445.5	71.9	 16
484	  7	160.3	33.8	 16
485	  7	174.3	34.7	 16
486	  7	167.5	17.5	 16
487	  7	192.3	33.2	 16
488	  7	191.0	26.4	 16
489	  7	68.0	16.6	 16
490	  7	84.3	16.5	 16
491	  7	64.3	8.1	 16
492	  7	77.5	13.9	 16
493	  7	191.3	22.6	 16
494	  7	151.3	18.5	 16
495	  7	569.3	42.7	 16
496	  7	85.5	13.1	 16
497	  7	126.5	18.8	 16
498	  7	119.8	24.1	 16
499	  7	349.3	62.2	 16
500	  7	134.3	26.3	 16
501	  7	112.5	17.9	 16
502	  7	538.5	83.3	 16
503	  7	775.5	125.2	 16
504	  7	157.8	22.2	 16
505	  7	492.8	95.1	 16
506	  7	215.0	43.0	 16
507	  7	205.5	22.4	 16
508	  7	128.3	20.3	 16
509	  7	165.0	33.7	 16
510	  7	109.8	22.5	 16
511	  7	168.8	26.6	 16
512	  7	92.5	13.6	 16
513	  7	60.0	9.5	 16
514	  7	60.0	7.7	 16
515	  7	70.3	11.2	 16
516	  7	74.8	16.3	 16
517	  7	532.5	57.2	 16
518	  7	108.3	19.2	 16
519	  7	131.8	24.2	 16
520	  7	90.0	15.0	 16
521	  7	117.8	20.1	 16
522	  7	114.3	14.1	 16
523	  7	86.0	14.0	 16
524	  7	174.5	27.1	 16
525	  7	66.3	13.8	 16
526	  7	52.8	10.2	 16
527	  7	81.3	22.4	 16
528	  7	91.3	20.2	 16
529	  7	189.0	31.9	 16
530	  7	118.8	18.7	 16
531	  7	98.5	17.6	 16
532	  7	234.5	29.9	 16
533	  7	61.0	9.5	 16
534	  7	92.3	14.4	 16
535	  7	78.8	17.3	 16
536	  7	503.3	40.7	 16
537	  7	226.5	40.7	 16
538	  7	257.3	27.0	 16
539	  7	1325.3	128.4	 16
540	  7	231.0	19.1	 16
541	  7	98.3	14.4	 16
542	  7	80.8	19.3	 16
543	  7	64.5	13.7	 16
544	  7	68.3	11.7	 16
545	  7	92.0	13.2	 16
546	  7	205.3	33.3	 16
547	  7	282.0	52.5	 16
548	  7	292.5	29.0	 16
549	  7	202.3	17.8	 16
550	  7	70.8	11.6	 16
551	  7	126.3	83.5	 16
552	  7	189.8	35.2	 16
553	  7	76.0	14.0	 16
554	  7	156.8	39.9	 16
555	  7	61.3	11.4	 16
556	  7	72.3	11.9	 16
557	  7	88.3	13.6	 16
558	  7	206.3	35.0	 20
559	  7	531.0	61.6	 16
560	  7	64.5	10.5	 16
561	  7	127.3	18.9	 16
562	  7	267.8	93.0	 16
563	  7	488.8	82.1	 16
564	  7	113.5	16.5	 16
565	  7	233.5	33.9	 16
566	  7	66.5	14.1	 16
567	  7	61.3	11.3	 16
568	  7	321.8	58.7	 16
569	  7	163.8	16.8	 16
570	  7	111.3	22.5	 16
571	  7	89.8	14.4	 16
572	  7	84.5	12.8	 16
573	  7	128.3	16.8	 16
574	  7	144.0	21.0	 16
575	  7	459.0	64.8	 16
576	  7	89.3	12.4	 16
577	  7	458.0	62.8	 16
578	  7	99.0	18.2	 16
579	  7	116.0	27.7	 16
580	  7	165.0	20.3	 16
581	  7	143.8	22.9	 16
582	  7	361.3	38.2	 16
583	  7	58.3	14.6	 16
584	  7	119.5	25.4	 16
585	  7	224.3	30.9	 16
586	  7	74.3	13.2	 16
587	  7	90.8	17.7	 16
588	  7	110.8	20.7	 16
589	  7	126.8	23.2	 16
590	  7	117.3	17.9	 16
591	  7	88.8	14.5	 16
592	  7	2118.3	289.1	 16
593	  7	1568.5	186.7	 16
594	  7	65.5	10.2	 16
595	  7	58.0	10.9	 16
596	  7	135.8	17.0	 16
597	  7	71.8	10.5	 16
598	  7	401.3	64.7	 16
599	  7	57.0	12.0	 16
600	  7	67.5	31.6	 16
601	  7	63.5	10.9	 16
602	  7	64.5	9.7	 16
603	  7	95.0	16.7	 16
604	  7	627.5	134.5	 16
605	  7	69.8	10.2	 16
606	  7	128.3	15.6	 16
607	  7	124.3	24.7	 16
608	  7	61.0	12.6	 16
609	  7	152.0	30.1	 16
610	  7	317.8	56.5	 16
611	  7	1780.0	176.1	 16
612	  7	142.8	23.2	 16
613	  7	144.8	19.2	 16
614	  7	103.3	21.1	 16
615	  7	124.5	17.6	 16
616	  7	90.3	17.2	 16
617	  7	221.3	27.4	 16
618	  7	77.0	18.3	 16
619	  7	197.8	20.3	 16
620	  7	328.0	45.1	 16
621	  7	444.3	47.4	 16
622	  7	154.0	16.3	 16
623	  7	145.8	147.8	 16
624	  7	69.3	11.2	 16
625	  7	558.0	120.7	 16
626	  7	104.0	17.2	 16
627	  7	411.8	52.9	 16
628	  7	277.5	42.5	 16
629	  7	69.0	12.5	 16
630	  7	289.5	31.2	 16
631	  7	417.5	34.3	 16
632	  7	220.8	25.0	 16
633	  7	223.5	23.4	 16
634	  7	105.5	16.8	 16
635	  7	165.8	32.7	 16
636	  7	156.0	15.9	 16
637	  7	665.5	83.2	 16
638	  7	71.8	8.3	 16
639	  7	275.0	37.3	 16
640	  7	66.3	11.0	 16
641	  7	112.8	19.5	 16
642	  7	210.5	45.1	 16
643	  7	64.5	12.8	 16
644	  7	320.3	31.7	 16
645	  7	99.3	15.1	 16
646	  7	197.8	29.3	 16
647	  7	284.0	43.0	 16
648	  7	338.5	45.7	 16
649	  7	994.0	156.9	 16
650	  7	96.5	12.6	 16
651	  7	134.5	12.2	 16
652	  7	127.8	24.6	 16
653	  7	131.8	21.1	 16
654	  7	149.0	25.3	 16
655	  7	158.8	26.8	 16
656	  7	104.0	17.4	 16
657	  7	145.3	14.6	 16
658	  7	115.5	13.7	 16
659	  7	609.8	66.9	 16
660	  7	101.5	18.8	 16
661	  7	190.8	32.4	 16
662	  7	86.5	19.3	 16
663	  7	350.5	51.9	 16
664	  7	303.3	32.0	 16
665	  7	220.0	35.3	 16
666	  7	234.3	35.2	 16
667	  7	269.5	32.6	 16
668	  7	464.5	71.4	 16
669	  7	203.3	26.7	 16
670	  7	399.8	52.8	 16
671	  7	84.5	15.8	 16
672	  7	86.3	17.8	 16
673	  7	120.8	66.3	 16
674	  7	77.5	11.2	 16
675	  7	96.0	18.2	 16
676	  7	1005.5	162.9	 16
677	  7	75.3	12.9	 20
678	  7	430.3	71.9	 16
679	  7	201.5	21.7	 16
680	  7	197.5	23.3	 16
681	  7	270.8	48.1	 16
682	  7	116.0	20.1	 16
683	  7	250.5	27.0	 16
684	  7	151.8	18.1	 16
685	  7	177.8	20.7	 16
686	  7	178.5	22.6	 16
687	  7	3888.0	445.4	 16
688	  7	206.8	37.6	 16
689	  7	158.0	17.0	 16
690	  7	137.5	21.8	 16
691	  7	116.5	22.6	 16
692	  7	156.0	21.5	 16
693	  7	510.0	62.1	 16
694	  7	106.5	17.5	 16
695	  7	86.3	17.9	 16
696	  7	58.8	11.7	 16
697	  7	62.3	7.3	 16
698	  7	92.8	17.8	 16
699	  7	261.5	43.4	 16
700	  7	105.3	12.4	 16
701	  7	91.5	13.2	 16
702	  7	119.8	16.1	 16
703	  7	81.8	16.5	 16
704	  7	73.5	8.8	 16
705	  7	87.5	10.8	 16
706	  7	200.8	24.6	 16
707	  7	172.5	23.7	 16
708	  7	92.3	15.6	 16
709	  7	146.8	23.5	 16
710	  7	232.3	24.6	 16
711	  7	90.5	28.1	 16
  0	  8	4344.8	796.1	 16
  1	  8	106.3	13.6	 16
  2	  8	135.3	20.1	 16
  3	  8	163.5	23.1	 16
  4	  8	98.8	16.7	 16
  5	  8	84.5	13.5	 16
  6	  8	82.0	10.8	 16
  7	  8	75.0	10.0	 16
  8	  8	215.0	38.6	 16
  9	  8	528.8	80.4	 16
 10	  8	177.0	20.4	 16
 11	  8	68.5	13.5	 16
 12	  8	6029.8	645.1	 16
 13	  8	126.0	13.7	 16
 14	  8	121.8	22.4	 16
 15	  8	7389.0	776.8	 16
 16	  8	8080.0	980.3	 16
 17	  8	97.0	13.1	 16
 18	  8	7004.8	1005.6	 16
 19	  8	150.3	22.9	 16
 20	  8	119.3	24.6	 16
 21	  8	131.8	16.7	 16
 22	  8	7314.8	1100.8	 16
 23	  8	86.8	11.0	 16
 24	  8	7108.5	155.1	 16
 25	  8	6260.8	1112.7	 16
 26	  8	114.8	11.4	 16
 27	  8	132.0	23.8	 16
 28	  8	7645.8	1548.8	 16
 29	  8	99.0	17.0	 16
 30	  8	6834.5	1480.9	 16
 31	  8	147.8	33.6	 16
 32	  8	132.8	23.3	 16
 33	  8	138.3	19.9	 16
 34	  8	7281.5	1770.1	 16
 35	  8	85.3	12.7	 16
 36	  8	5610.3	934.8	 16
 37	  8	119.0	19.6	 16
 38	  8	107.0	19.7	 16
 39	  8	117.8	23.2	 16
 40	  8	113.3	13.1	 16
 41	  8	80.3	12.5	 16
 42	  8	7202.3	243.9	 16
 43	  8	6280.5	975.8	 16
 44	  8	126.5	24.6	 16
 45	  8	119.5	25.4	 16
 46	  8	6233.5	933.0	 16
 47	  8	88.5	17.2	 16
 48	  8	109.8	14.9	 16
 49	  8	112.5	17.8	 16
 50	  8	117.5	23.7	 16
 51	  8	113.5	15.5	 16
 52	  8	101.8	11.1	 16
 53	  8	83.5	11.8	 16
 54	  8	7214.3	848.4	 16
 55	  8	129.0	16.0	 16
 56	  8	128.0	16.9	 16
 57	  8	6342.0	1298.0	 16
 58	  8	121.3	12.9	 16
 59	  8	66.3	12.2	 16
 60	  8	75.0	10.7	 16
 61	  8	89.8	17.0	 16
 62	  8	6895.5	186.7	 16
 63	  8	6580.0	378.1	 16
 64	  8	7422.8	488.6	 16
 65	  8	8119.3	481.9	 16
 66	  8	8583.8	770.6	 16
 67	  8	104.0	18.3	 16
 68	  8	5885.8	542.3	 16
 69	  8	136.3	15.1	 16
 70	  8	110.0	15.1	 16
 71	  8	6730.0	820.9	 16
 72	  8	6917.0	1002.2	 16
 73	  8	81.0	13.4	 16
 74	  8	115.0	15.9	 16
 75	  8	5445.8	965.9	 16
 76	  8	5996.5	988.9	 16
 77	  8	6321.3	1164.1	 16
 78	  8	123.5	18.1	 16
 79	  8	72.3	12.4	 16
 80	  8	5504.8	343.6	 16
 81	  8	100.5	20.6	 16
 82	  8	102.0	11.1	 16
 83	  8	104.0	14.9	 16
 84	  8	7111.3	748.7	 16
 85	  8	103.5	21.7	 16
 86	  8	110.3	18.9	 16
 87	  8	108.0	14.5	 20
 88	  8	5890.0	1143.0	 16
 89	  8	121.8	22.1	 16
 90	  8	102.5	16.0	 16
 91	  8	72.3	11.3	 16
 92	  8	115.5	72.8	 16
 93	  8	6290.3	721.6	 16
 94	  8	6191.5	1108.7	 16
 95	  8	116.0	13.9	 16
 96	  8	104.5	31.2	 16
 97	  8	72.3	11.1	 16
 98	  8	127.5	21.0	 16
 99	  8	6297.3	1081.8	 16
100	  8	6283.8	1320.8	 16
101	  8	112.0	17.5	 16
102	  8	115.3	33.5	 16
103	  8	72.5	13.8	 16
104	  8	106.5	13.1	 16
105	  8	7219.0	244.8	 16
106	  8	7262.8	1609.4	 16
107	  8	7556.3	1353.6	 16
108	  8	123.8	12.9	 16
109	  8	71.3	22.6	 16
110	  8	66.3	9.4	 16
111	  8	96.0	33.5	 16
112	  8	95.8	13.9	 16
113	  8	166.8	24.3	 16
114	  8	82.3	12.3	 16
115	  8	86.5	13.5	 16
116	  8	155.8	25.9	 16
117	  8	133.8	20.0	 16
118	  8	107.8	14.4	 16
119	  8	202.8	27.5	 16
120	  8	222.0	28.5	 16
121	  8	305.3	28.0	 16
122	  8	172.5	25.1	 16
123	  8	142.8	24.3	 16
124	  8	128.5	40.3	 16
125	  8	867.3	77.6	 16
126	  8	2143.0	379.1	 16
127	  8	1963.5	343.4	 16
128	  8	1550.8	394.5	 16
129	  8	159.3	27.1	 16
130	  8	96.0	21.7	 16
131	  8	635.5	109.3	 16
132	  8	89.0	11.3	 16
133	  8	312.5	70.5	 16
134	  8	2745.0	285.4	 16
135	  8	728.5	60.6	 16
136	  8	278.0	34.7	 16
137	  8	146.0	22.0	 16
138	  8	138.0	19.3	 16
139	  8	92.5	13.3	 16
140	  8	71.0	11.5	 16
141	  8	100.8	19.5	 16
142	  8	112.3	14.0	 16
143	  8	121.5	20.8	 16
144	  8	109.8	15.5	 16
145	  8	182.8	31.2	 16
146	  8	87.0	21.4	 16
147	  8	85.3	14.2	 16
148	  8	68.5	14.4	 16
149	  8	90.3	14.7	 16
150	  8	72.5	10.6	 16
151	  8	90.3	13.6	 16
152	  8	104.3	18.1	 16
153	  8	108.3	19.9	 16
154	  8	144.5	23.5	 16
155	  8	87.8	12.4	 16
156	  8	527.8	44.9	 16
157	  8	597.8	67.0	 16
158	  8	126.8	19.1	 16
159	  8	248.3	22.2	 16
160	  8	152.3	22.6	 16
161	  8	104.5	23.1	 16
162	  8	197.5	19.9	 16
163	  8	201.3	135.1	 16
164	  8	111.0	18.9	 16
165	  8	106.3	16.5	 16
166	  8	65.5	10.8	 16
167	  8	71.5	14.0	 16
168	  8	92.8	16.1	 16
169	  8	108.8	13.6	 16
170	  8	103.5	25.3	 16
171	  8	99.0	14.2	 16
172	  8	64.8	9.8	 16
173	  8	92.5	25.9	 16
174	  8	154.0	38.2	 16
175	  8	127.3	53.2	 16
176	  8	78.0	14.8	 16
177	  8	65.3	9.8	 16
178	  8	106.3	18.1	 16
179	  8	85.0	13.8	 16
180	  8	277.5	35.6	 16
181	  8	88.3	13.1	 16
182	  8	115.3	20.1	 16
183	  8	84.5	31.0	 16
184	  8	66.8	15.4	 16
185	  8	113.0	18.4	 16
186	  8	150.5	15.9	 16
187	  8	62.3	13.7	 16
188	  8	83.5	17.1	 16
189	  8	233.0	36.6	 16
190	  8	88.0	10.5	 16
191	  8	77.5	13.7	 16
192	  8	92.8	17.4	 16
193	  8	88.3	16.0	 16
194	  8	142.8	19.3	 16
195	  8	86.8	21.0	 16
196	  8	96.3	14.4	 16
197	  8	67.0	12.2	 16
198	  8	102.0	28.9	 16
199	  8	293.5	71.7	 16
200	  8	181.5	24.9	 16
201	  8	102.0	131.7	 16
202	  8	101.5	13.2	 16
203	  8	99.3	12.3	 16
204	  8	120.8	16.2	 16
205	  8	67.3	12.7	 16
206	  8	75.5	12.9	 20
207	  8	68.5	11.6	 16
208	  8	89.0	15.6	 16
209	  8	61.3	13.1	 16
210	  8	70.0	19.1	 16
211	  8	176.5	15.3	 16
212	  8	78.8	11.1	 16
213	  8	161.3	21.5	 16
214	  8	146.0	27.8	 16
215	  8	81.3	13.6	 16
216	  8	88.5	12.6	 16
217	  8	101.5	19.7	 16
218	  8	86.8	15.3	 16
219	  8	71.3	12.8	 16
220	  8	114.3	21.7	 16
221	  8	125.3	27.0	 16
222	  8	103.8	24.4	 16
223	  8	88.3	13.2	 16
224	  8	76.5	17.9	 16
225	  8	185.3	23.3	 16
226	  8	222.8	40.0	 16
227	  8	115.3	14.0	 16
228	  8	123.8	31.5	 16
229	  8	63.0	13.6	 16
230	  8	71.5	8.3	 16
231	  8	100.5	18.8	 16
232	  8	78.5	14.5	 16
233	  8	95.3	16.2	 16
234	  8	75.3	13.6	 16
235	  8	106.3	21.2	 16
236	  8	119.8	16.3	 16
237	  8	65.5	6.0	 16
238	  8	91.3	27.5	 16
239	  8	237.8	35.7	 16
240	  8	62.8	9.1	 16
241	  8	107.3	14.4	 16
242	  8	203.0	29.9	 16
243	  8	138.3	29.0	 16
244	  8	140.8	31.2	 16
245	  8	71.5	16.7	 16
246	  8	66.0	12.5	 16
247	  8	78.3	11.6	 16
248	  8	86.5	10.8	 16
249	  8	94.0	18.5	 16
250	  8	69.3	9.6	 16
251	  8	252.5	32.7	 16
252	  8	224.8	32.3	 16
253	  8	62.5	10.6	 16
254	  8	73.0	12.5	 16
255	  8	67.3	12.6	 16
256	  8	76.5	13.4	 16
257	  8	162.0	24.2	 16
258	  8	75.8	11.9	 16
259	  8	112.5	18.5	 16
260	  8	106.3	14.8	 16
261	  8	152.8	24.1	 16
262	  8	77.0	11.7	 16
263	  8	1273.3	170.2	 16
264	  8	87.0	14.4	 16
265	  8	79.0	12.8	 16
266	  8	62.3	13.5	 16
267	  8	178.3	30.1	 16
268	  8	251.8	31.0	 16
269	  8	72.3	12.2	 16
270	  8	80.3	16.1	 16
271	  8	248.8	61.9	 16
272	  8	220.8	31.4	 16
273	  8	69.0	12.6	 16
274	  8	80.0	11.2	 16
275	  8	92.8	14.2	 16
276	  8	232.0	13.5	 16
277	  8	127.5	17.9	 16
278	  8	126.8	27.7	 16
279	  8	87.5	12.4	 16
280	  8	85.5	14.3	 16
281	  8	98.3	13.9	 16
282	  8	533.5	54.5	 16
283	  8	112.3	19.5	 16
284	  8	80.0	12.2	 16
285	  8	80.3	13.9	 16
286	  8	93.0	18.3	 16
287	  8	109.5	15.9	 16
288	  8	115.8	19.5	 16
289	  8	240.0	63.8	 16
290	  8	202.5	30.3	 16
291	  8	115.8	20.3	 16
292	  8	68.3	11.5	 16
293	  8	187.0	23.5	 16
294	  8	106.8	17.2	 16
295	  8	136.0	25.8	 16
296	  8	119.3	26.4	 16
297	  8	96.5	13.3	 16
298	  8	226.3	33.1	 16
299	  8	142.8	19.3	 16
300	  8	215.5	27.3	 16
301	  8	191.3	33.5	 16
302	  8	68.5	10.4	 16
303	  8	96.8	17.3	 16
304	  8	86.0	14.9	 16
305	  8	75.3	10.5	 16
306	  8	361.3	44.0	 16
307	  8	91.0	17.4	 16
308	  8	102.5	16.5	 16
309	  8	90.0	15.6	 16
310	  8	122.3	19.6	 16
311	  8	229.3	60.8	 16
312	  8	127.0	18.8	 16
313	  8	258.3	21.3	 16
314	  8	303.3	36.3	 16
315	  8	151.5	20.3	 16
316	  8	196.8	42.0	 16
317	  8	93.3	16.0	 16
318	  8	85.0	10.1	 16
319	  8	82.3	15.9	 16
320	  8	69.0	19.1	 16
321	  8	192.3	29.8	 16
322	  8	123.8	21.5	 16
323	  8	102.0	21.4	 16
324	  8	167.8	17.1	 16
325	  8	291.5	77.3	 20
326	  8	745.8	155.5	 16
327	  8	122.8	19.3	 16
328	  8	81.3	29.5	 16
329	  8	147.3	24.7	 16
330	  8	643.5	115.1	 16
331	  8	146.3	21.7	 16
332	  8	87.3	14.7	 16
333	  8	2175.0	239.4	 16
334	  8	1662.5	401.8	 16
335	  8	117.0	20.6	 16
336	  8	73.0	11.8	 16
337	  8	123.0	30.8	 16
338	  8	68.3	12.3	 16
339	  8	76.8	14.9	 16
340	  8	133.0	16.8	 16
341	  8	76.8	14.0	 16
342	  8	105.0	17.1	 16
343	  8	66.3	11.7	 16
344	  8	107.3	17.3	 16
345	  8	100.8	19.5	 16
346	  8	200.8	33.3	 16
347	  8	611.5	87.4	 16
348	  8	169.3	16.8	 16
349	  8	82.5	14.6	 16
350	  8	86.8	10.8	 16
351	  8	64.3	15.7	 16
352	  8	145.0	35.4	 16
353	  8	77.0	13.9	 16
354	  8	78.3	16.8	 16
355	  8	152.8	25.5	 16
356	  8	107.5	20.2	 16
357	  8	172.8	23.7	 16
358	  8	1172.3	93.6	 16
359	  8	192.5	23.5	 16
360	  8	138.0	25.8	 16
361	  8	62.5	14.4	 16
362	  8	67.8	12.5	 16
363	  8	75.0	12.6	 16
364	  8	55.3	10.3	 16
365	  8	71.0	16.6	 16
366	  8	142.0	23.0	 16
367	  8	124.3	16.9	 16
368	  8	95.8	14.4	 16
369	  8	125.0	16.0	 16
370	  8	127.3	17.3	 16
371	  8	113.5	14.2	 16
372	  8	155.8	22.3	 16
373	  8	137.8	32.3	 16
374	  8	83.0	20.5	 16
375	  8	63.3	11.0	 16
376	  8	68.0	9.2	 16
377	  8	90.5	12.1	 16
378	  8	228.3	41.2	 16
379	  8	175.5	52.5	 16
380	  8	143.5	22.1	 16
381	  8	82.0	13.2	 16
382	  8	73.8	13.0	 16
383	  8	742.0	42.6	 16
384	  8	148.0	22.5	 16
385	  8	79.0	12.7	 16
386	  8	148.0	135.8	 16
387	  8	194.3	24.1	 16
388	  8	167.8	28.5	 16
389	  8	50.5	7.2	 16
390	  8	66.0	14.9	 16
391	  8	80.3	14.8	 16
392	  8	76.0	14.3	 16
393	  8	75.0	9.8	 16
394	  8	145.5	22.0	 16
395	  8	221.8	28.2	 16
396	  8	265.0	30.9	 16
397	  8	245.8	27.5	 16
398	  8	78.3	22.2	 16
399	  8	80.0	11.7	 16
400	  8	82.5	16.0	 16
401	  8	417.8	40.9	 16
402	  8	100.3	18.2	 16
403	  8	85.3	15.8	 16
404	  8	84.8	17.7	 16
405	  8	54.0	6.4	 16
406	  8	148.3	13.1	 16
407	  8	70.0	13.0	 16
408	  8	73.8	14.5	 16
409	  8	94.8	18.4	 16
410	  8	90.3	12.9	 16
411	  8	251.3	29.8	 16
412	  8	133.8	20.0	 16
413	  8	159.5	28.8	 16
414	  8	61.3	10.9	 16
415	  8	153.3	17.0	 16
416	  8	52.8	14.1	 16
417	  8	67.3	8.8	 16
418	  8	97.0	15.9	 16
419	  8	66.0	10.8	 16
420	  8	59.0	10.9	 16
421	  8	61.0	12.0	 16
422	  8	71.0	10.9	 16
423	  8	118.0	16.7	 16
424	  8	473.3	31.8	 16
425	  8	105.0	13.6	 16
426	  8	348.0	20.5	 16
427	  8	77.0	10.4	 16
428	  8	67.0	11.0	 16
429	  8	68.3	9.7	 16
430	  8	117.0	19.4	 16
431	  8	93.5	19.4	 16
432	  8	82.0	15.5	 16
433	  8	66.5	17.4	 16
434	  8	113.0	19.5	 16
435	  8	114.5	28.2	 16
436	  8	94.3	13.8	 16
437	  8	128.3	20.3	 16
438	  8	183.5	27.0	 16
439	  8	67.0	11.5	 16
440	  8	74.3	17.7	 16
441	  8	94.5	15.3	 16
442	  8	71.3	31.3	 16
443	  8	126.0	21.3	 20
444	  8	102.8	24.9	 16
445	  8	82.0	15.1	 16
446	  8	107.8	21.7	 16
447	  8	135.8	28.7	 16
448	  8	295.0	75.3	 16
449	  8	1400.5	208.2	 16
450	  8	227.5	30.8	 16
451	  8	70.5	11.9	 16
452	  8	187.5	33.6	 16
453	  8	134.8	24.9	 16
454	  8	267.5	39.0	 16
455	  8	119.3	19.3	 16
456	  8	121.0	18.7	 16
457	  8	61.0	6.2	 16
458	  8	71.0	11.5	 16
459	  8	84.8	19.5	 16
460	  8	215.8	34.8	 16
461	  8	65.3	11.2	 16
462	  8	126.0	19.2	 16
463	  8	75.5	13.7	 16
464	  8	61.3	9.2	 16
465	  8	62.3	8.4	 16
466	  8	76.0	19.3	 16
467	  8	113.5	22.8	 16
468	  8	67.3	11.6	 16
469	  8	82.0	44.1	 16
470	  8	137.3	56.3	 16
471	  8	65.0	12.0	 16
472	  8	91.5	17.1	 16
473	  8	140.0	30.8	 16
474	  8	61.0	13.9	 16
475	  8	69.3	9.8	 16
476	  8	49.3	8.1	 16
477	  8	83.8	14.3	 16
478	  8	61.5	10.9	 16
479	  8	61.0	13.0	 16
480	  8	70.0	12.5	 16
481	  8	68.3	13.5	 16
482	  8	80.3	13.0	 16
483	  8	176.5	25.3	 16
484	  8	182.5	15.8	 16
485	  8	252.5	41.8	 16
486	  8	188.8	27.6	 16
487	  8	181.5	26.9	 16
488	  8	157.8	39.7	 16
489	  8	64.8	10.2	 16
490	  8	88.8	15.6	 16
491	  8	61.3	10.4	 16
492	  8	58.8	8.3	 16
493	  8	196.5	26.7	 16
494	  8	168.5	15.4	 16
495	  8	222.3	30.4	 16
496	  8	72.5	11.6	 16
497	  8	103.5	64.4	 16
498	  8	119.3	34.7	 16
499	  8	105.8	11.6	 16
500	  8	79.3	18.3	 16
501	  8	149.8	19.3	 16
502	  8	192.0	40.5	 16
503	  8	210.3	34.6	 16
504	  8	116.5	23.3	 16
505	  8	103.0	16.8	 16
506	  8	112.8	17.7	 16
507	  8	163.5	33.9	 16
508	  8	85.3	12.6	 16
509	  8	92.5	14.0	 16
510	  8	79.0	14.9	 16
511	  8	74.3	8.7	 16
512	  8	86.3	16.0	 16
513	  8	59.0	12.3	 16
514	  8	61.0	10.1	 16
515	  8	64.0	12.5	 16
516	  8	54.8	13.2	 16
517	  8	103.3	17.1	 16
518	  8	101.3	16.4	 16
519	  8	286.8	26.7	 16
520	  8	184.3	15.5	 16
521	  8	89.3	11.2	 16
522	  8	109.8	20.6	 16
523	  8	96.0	9.9	 16
524	  8	118.3	16.3	 16
525	  8	61.5	11.9	 16
526	  8	53.3	8.8	 16
527	  8	75.0	16.9	 16
528	  8	83.3	7.5	 16
529	  8	100.5	11.5	 16
530	  8	112.5	18.1	 16
531	  8	399.5	54.6	 16
532	  8	207.5	30.9	 16
533	  8	61.3	7.9	 16
534	  8	56.3	11.8	 16
535	  8	83.0	14.4	 16
536	  8	98.5	20.0	 16
537	  8	78.3	11.7	 16
538	  8	262.3	31.5	 16
539	  8	551.8	63.5	 16
540	  8	210.5	30.1	 16
541	  8	77.3	18.4	 16
542	  8	62.8	10.1	 16
543	  8	62.3	9.3	 16
544	  8	89.8	18.9	 16
545	  8	73.3	11.2	 16
546	  8	85.5	13.8	 16
547	  8	75.3	9.9	 16
548	  8	207.8	31.8	 16
549	  8	113.0	16.7	 16
550	  8	78.8	10.3	 16
551	  8	108.8	15.2	 16
552	  8	208.8	29.2	 16
553	  8	106.5	16.0	 16
554	  8	79.0	15.1	 16
555	  8	60.3	10.2	 16
556	  8	71.8	13.1	 16
557	  8	64.3	6.8	 16
558	  8	179.0	31.4	 16
559	  8	342.3	38.2	 16
560	  8	78.5	21.1	 16
561	  8	107.0	20.7	 16
562	  8	129.8	27.5	 20
563	  8	693.5	91.8	 16
564	  8	98.8	15.2	 16
565	  8	86.8	14.1	 16
566	  8	64.3	11.4	 16
567	  8	72.5	13.3	 16
568	  8	127.3	24.8	 16
569	  8	172.0	26.8	 16
570	  8	116.0	16.4	 16
571	  8	75.8	15.5	 16
572	  8	98.3	14.5	 16
573	  8	96.5	17.4	 16
574	  8	116.8	15.6	 16
575	  8	121.3	17.5	 16
576	  8	106.5	19.2	 16
577	  8	109.0	17.7	 16
578	  8	79.3	17.1	 16
579	  8	65.3	11.5	 16
580	  8	116.0	20.9	 16
581	  8	82.3	11.0	 16
582	  8	121.3	17.8	 16
583	  8	69.8	13.6	 16
584	  8	80.5	17.9	 16
585	  8	95.5	17.8	 16
586	  8	52.5	10.2	 16
587	  8	69.5	11.3	 16
588	  8	63.0	6.4	 16
589	  8	133.5	20.0	 16
590	  8	149.8	27.6	 16
591	  8	79.3	11.6	 16
592	  8	373.8	73.1	 16
593	  8	287.3	47.5	 16
594	  8	64.3	11.3	 16
595	  8	51.0	8.3	 16
596	  8	199.0	24.6	 16
597	  8	67.5	16.3	 16
598	  8	206.0	29.3	 16
599	  8	54.0	9.4	 16
600	  8	54.3	9.6	 16
601	  8	67.3	15.7	 16
602	  8	60.3	11.9	 16
603	  8	94.5	17.5	 16
604	  8	261.0	46.9	 16
605	  8	81.5	12.0	 16
606	  8	71.0	10.2	 16
607	  8	94.5	10.9	 16
608	  8	58.8	9.5	 16
609	  8	100.3	11.8	 16
610	  8	82.0	9.5	 16
611	  8	301.8	55.4	 16
612	  8	114.5	16.6	 16
613	  8	64.5	11.5	 16
614	  8	76.3	12.8	 16
615	  8	253.5	30.3	 16
616	  8	104.5	16.8	 16
617	  8	280.0	38.6	 16
618	  8	58.0	9.3	 16
619	  8	107.3	15.3	 16
620	  8	60.8	11.5	 16
621	  8	147.0	32.1	 16
622	  8	77.0	11.9	 16
623	  8	120.0	22.0	 16
624	  8	67.3	11.1	 16
625	  8	179.0	16.6	 16
626	  8	106.0	19.8	 16
627	  8	380.3	56.9	 16
628	  8	190.0	23.6	 16
629	  8	72.8	15.0	 16
630	  8	216.0	25.2	 16
631	  8	312.3	51.8	 16
632	  8	114.0	20.3	 16
633	  8	116.5	18.4	 16
634	  8	152.5	15.5	 16
635	  8	102.5	19.7	 16
636	  8	65.0	10.1	 16
637	  8	105.3	11.5	 16
638	  8	59.5	8.3	 16
639	  8	90.5	71.7	 16
640	  8	70.3	14.8	 16
641	  8	97.8	19.8	 16
642	  8	172.8	26.0	 16
643	  8	61.8	12.3	 16
644	  8	315.0	40.5	 16
645	  8	96.0	29.9	 16
646	  8	224.0	27.6	 16
647	  8	184.0	27.8	 16
648	  8	227.0	28.5	 16
649	  8	289.0	61.2	 16
650	  8	77.5	12.2	 16
651	  8	79.8	12.4	 16
652	  8	89.0	15.0	 16
653	  8	76.3	10.3	 16
654	  8	78.8	12.9	 16
655	  8	90.0	21.5	 16
656	  8	70.0	14.4	 16
657	  8	73.0	14.1	 16
658	  8	80.0	15.4	 16
659	  8	284.0	31.0	 16
660	  8	70.5	12.1	 16
661	  8	110.0	20.8	 16
662	  8	63.3	13.2	 16
663	  8	92.3	21.4	 16
664	  8	148.5	23.1	 16
665	  8	240.5	29.0	 16
666	  8	215.3	30.0	 16
667	  8	336.0	42.7	 16
668	  8	185.5	26.9	 16
669	  8	184.0	25.7	 16
670	  8	245.5	33.8	 16
671	  8	58.3	7.7	 16
672	  8	94.8	20.6	 16
673	  8	72.0	12.7	 16
674	  8	62.0	10.7	 16
675	  8	69.3	9.6	 16
676	  8	153.3	23.1	 16
677	  8	69.0	15.0	 16
678	  8	236.0	30.3	 16
679	  8	103.3	18.9	 16
680	  8	115.0	14.2	 16
681	  8	157.3	25.6	 20
682	  8	141.0	21.4	 16
683	  8	460.3	40.3	 16
684	  8	137.0	19.9	 16
685	  8	147.5	17.4	 16
686	  8	158.3	20.7	 16
687	  8	1093.8	143.5	 16
688	  8	133.5	18.2	 16
689	  8	121.5	23.1	 16
690	  8	206.0	20.1	 16
691	  8	176.5	19.7	 16
692	  8	183.5	23.0	 16
693	  8	91.0	16.0	 16
694	  8	76.5	14.9	 16
695	  8	81.3	17.3	 16
696	  8	61.0	8.5	 16
697	  8	72.5	15.0	 16
698	  8	83.3	15.2	 16
699	  8	95.3	16.3	 16
700	  8	92.3	15.5	 16
701	  8	74.5	12.4	 16
702	  8	106.0	11.8	 16
703	  8	77.5	18.8	 16
704	  8	75.0	11.5	 16
705	  8	71.8	12.5	 16
706	  8	181.8	22.4	 16
707	  8	137.5	16.6	 16
708	  8	80.5	12.6	 16
709	  8	115.8	24.4	 16
710	  8	80.5	14.5	 16
711	  8	7197.8	755.8	 16
  0	  9	101.3	13.8	 16
  1	  9	165.5	31.8	 16
  2	  9	102.0	15.2	 16
  3	  9	89.8	26.4	 16
  4	  9	75.0	14.7	 16
  5	  9	80.3	10.8	 16
  6	  9	557.8	146.0	 16
  7	  9	81.0	10.2	 16
  8	  9	84.0	11.9	 16
  9	  9	76.5	13.2	 16
 10	  9	162.8	26.2	 16
 11	  9	72.3	10.1	 16
 12	  9	5978.5	690.6	 16
 13	  9	120.0	20.9	 16
 14	  9	112.3	15.1	 16
 15	  9	111.3	17.3	 16
 16	  9	8513.5	791.1	 16
 17	  9	94.5	20.4	 16
 18	  9	7869.5	186.4	 16
 19	  9	7056.0	589.7	 16
 20	  9	7483.3	659.1	 16
 21	  9	7759.8	1195.7	 16
 22	  9	130.3	22.2	 16
 23	  9	86.3	13.7	 16
 24	  9	6902.8	1036.8	 16
 25	  9	129.0	26.5	 16
 26	  9	101.5	11.5	 16
 27	  9	116.3	21.5	 16
 28	  9	8685.3	1231.8	 16
 29	  9	97.3	11.6	 16
 30	  9	7999.8	329.1	 16
 31	  9	7234.5	1425.5	 16
 32	  9	7425.3	1539.9	 16
 33	  9	7348.0	1769.6	 16
 34	  9	124.5	25.6	 16
 35	  9	82.3	11.9	 16
 36	  9	5554.8	1031.7	 16
 37	  9	117.8	20.6	 16
 38	  9	119.3	16.1	 16
 39	  9	112.5	16.8	 16
 40	  9	97.0	13.8	 16
 41	  9	87.0	13.6	 16
 42	  9	6991.0	1062.7	 16
 43	  9	121.3	14.5	 16
 44	  9	95.8	14.5	 16
 45	  9	109.5	13.0	 16
 46	  9	6807.0	995.8	 16
 47	  9	82.5	25.1	 16
 48	  9	112.0	9.8	 16
 49	  9	101.8	23.4	 16
 50	  9	5615.3	1025.0	 16
 51	  9	106.5	16.6	 16
 52	  9	109.8	13.8	 16
 53	  9	80.8	13.5	 16
 54	  9	7804.0	266.6	 16
 55	  9	6607.5	1334.8	 16
 56	  9	6194.8	1321.3	 16
 57	  9	128.3	19.7	 16
 58	  9	97.0	10.6	 16
 59	  9	61.5	10.7	 16
 60	  9	92.5	20.5	 16
 61	  9	73.0	12.2	 16
 62	  9	7105.0	731.9	 16
 63	  9	132.8	20.9	 16
 64	  9	115.3	14.2	 16
 65	  9	128.0	25.2	 16
 66	  9	8305.8	728.9	 16
 67	  9	91.3	14.9	 16
 68	  9	5954.0	572.7	 16
 69	  9	113.5	17.4	 16
 70	  9	102.3	14.7	 16
 71	  9	128.5	21.6	 16
 72	  9	7103.5	558.7	 16
 73	  9	86.3	14.5	 16
 74	  9	103.5	14.3	 16
 75	  9	92.5	22.2	 16
 76	  9	109.8	18.3	 16
 77	  9	129.0	36.0	 16
 78	  9	94.3	14.4	 16
 79	  9	75.3	14.2	 16
 80	  9	5620.5	424.3	 16
 81	  9	140.0	30.0	 16
 82	  9	111.8	16.9	 16
 83	  9	111.8	16.8	 16
 84	  9	6826.3	637.3	 16
 85	  9	87.5	15.5	 16
 86	  9	101.3	13.1	 16
 87	  9	100.5	19.4	 16
 88	  9	5958.8	666.7	 16
 89	  9	115.3	19.3	 16
 90	  9	112.5	17.0	 20
 91	  9	79.8	12.1	 16
 92	  9	107.5	15.4	 16
 93	  9	118.0	14.4	 16
 94	  9	122.5	24.4	 16
 95	  9	6433.8	1340.0	 16
 96	  9	119.3	20.3	 16
 97	  9	63.5	11.5	 16
 98	  9	116.5	16.7	 16
 99	  9	107.0	25.5	 16
100	  9	116.3	14.8	 16
101	  9	6599.8	1440.4	 16
102	  9	117.3	20.3	 16
103	  9	78.0	15.4	 16
104	  9	6472.0	1558.4	 16
105	  9	131.3	22.6	 16
106	  9	111.8	24.9	 16
107	  9	103.8	17.7	 16
108	  9	7701.8	1361.2	 16
109	  9	72.5	11.0	 16
110	  9	58.8	12.8	 16
111	  9	347.5	66.9	 16
112	  9	1164.3	136.9	 16
113	  9	501.0	97.6	 16
114	  9	272.3	53.7	 16
115	  9	87.0	16.1	 16
116	  9	89.0	18.6	 16
117	  9	60.5	11.4	 16
118	  9	98.8	19.1	 16
119	  9	141.0	17.3	 16
120	  9	248.0	41.3	 16
121	  9	124.3	19.0	 16
122	  9	97.3	15.4	 16
123	  9	112.3	19.5	 16
124	  9	428.3	93.4	 16
125	  9	84.3	14.1	 16
126	  9	90.5	18.9	 16
127	  9	373.0	87.2	 16
128	  9	81.8	17.3	 16
129	  9	127.3	30.2	 16
130	  9	89.0	17.0	 16
131	  9	152.8	20.1	 16
132	  9	444.3	88.6	 16
133	  9	130.0	22.2	 16
134	  9	1514.3	319.8	 16
135	  9	60.3	9.1	 16
136	  9	114.3	27.9	 16
137	  9	98.3	14.6	 16
138	  9	71.3	13.9	 16
139	  9	74.3	9.8	 16
140	  9	72.5	11.3	 16
141	  9	185.8	38.2	 16
142	  9	126.3	19.8	 16
143	  9	957.0	143.4	 16
144	  9	100.0	16.4	 16
145	  9	110.0	20.9	 16
146	  9	125.5	21.5	 16
147	  9	79.0	15.8	 16
148	  9	120.5	20.0	 16
149	  9	79.3	19.8	 16
150	  9	362.0	84.7	 16
151	  9	102.5	20.2	 16
152	  9	7419.5	2010.7	 16
153	  9	697.5	183.5	 16
154	  9	212.0	20.5	 16
155	  9	1991.8	263.7	 16
156	  9	562.0	87.5	 16
157	  9	1039.5	116.6	 16
158	  9	178.5	88.4	 16
159	  9	372.3	85.6	 16
160	  9	772.5	44.2	 16
161	  9	66.8	12.7	 16
162	  9	128.3	73.3	 16
163	  9	100.0	13.3	 16
164	  9	163.5	23.7	 16
165	  9	395.5	52.3	 16
166	  9	143.3	24.0	 16
167	  9	114.5	19.7	 16
168	  9	115.5	19.6	 16
169	  9	770.8	124.0	 16
170	  9	2350.8	565.1	 16
171	  9	79.0	12.4	 16
172	  9	124.5	20.1	 16
173	  9	156.3	28.5	 16
174	  9	287.3	55.7	 16
175	  9	191.0	28.4	 16
176	  9	84.0	14.6	 16
177	  9	69.3	6.3	 16
178	  9	62.0	14.5	 16
179	  9	106.0	21.7	 16
180	  9	86.0	20.7	 16
181	  9	73.3	13.6	 16
182	  9	79.5	13.2	 16
183	  9	83.3	15.6	 16
184	  9	80.5	13.4	 16
185	  9	84.3	11.3	 16
186	  9	77.8	14.4	 16
187	  9	88.3	12.2	 16
188	  9	78.5	13.4	 16
189	  9	86.3	16.4	 16
190	  9	88.3	29.4	 16
191	  9	513.0	80.8	 16
192	  9	424.0	81.4	 16
193	  9	109.0	22.9	 16
194	  9	62.0	8.7	 16
195	  9	250.8	47.5	 16
196	  9	86.8	17.0	 16
197	  9	93.0	32.7	 16
198	  9	169.0	34.6	 16
199	  9	132.3	25.8	 16
200	  9	82.8	14.5	 16
201	  9	2650.3	754.4	 16
202	  9	76.0	13.3	 16
203	  9	81.5	15.5	 16
204	  9	125.3	16.9	 16
205	  9	321.0	62.3	 16
206	  9	591.5	84.5	 16
207	  9	103.3	18.8	 16
208	  9	150.3	27.5	 16
209	  9	71.0	11.7	 20
210	  9	234.0	45.2	 16
211	  9	93.3	15.0	 16
212	  9	545.3	86.0	 16
213	  9	389.0	66.6	 16
214	  9	141.5	15.6	 16
215	  9	94.3	12.8	 16
216	  9	104.8	16.4	 16
217	  9	84.3	16.8	 16
218	  9	82.5	19.9	 16
219	  9	73.5	10.5	 16
220	  9	187.0	37.6	 16
221	  9	155.3	26.4	 16
222	  9	136.5	21.2	 16
223	  9	190.5	21.0	 16
224	  9	125.0	19.8	 16
225	  9	188.5	30.5	 16
226	  9	88.8	103.3	 16
227	  9	152.0	23.4	 16
228	  9	61.8	13.5	 16
229	  9	335.5	64.5	 16
230	  9	127.5	22.1	 16
231	  9	1735.8	310.2	 16
232	  9	125.8	21.0	 16
233	  9	734.5	126.0	 16
234	  9	91.3	15.3	 16
235	  9	507.8	79.8	 16
236	  9	234.0	38.8	 16
237	  9	165.8	30.0	 16
238	  9	554.8	63.7	 16
239	  9	109.5	17.1	 16
240	  9	475.5	73.1	 16
241	  9	129.8	22.9	 16
242	  9	96.8	21.5	 16
243	  9	88.5	29.9	 16
244	  9	86.3	17.5	 16
245	  9	128.0	20.9	 16
246	  9	77.3	13.7	 16
247	  9	4198.8	1076.3	 16
248	  9	162.8	43.0	 16
249	  9	217.3	46.4	 16
250	  9	210.3	44.3	 16
251	  9	171.8	29.3	 16
252	  9	684.3	122.1	 16
253	  9	301.8	31.5	 16
254	  9	189.5	39.4	 16
255	  9	69.3	13.0	 16
256	  9	114.5	24.6	 16
257	  9	105.0	14.0	 16
258	  9	1109.0	160.2	 16
259	  9	131.3	16.2	 16
260	  9	108.0	18.6	 16
261	  9	122.0	19.0	 16
262	  9	480.3	115.6	 16
263	  9	74.5	16.3	 16
264	  9	74.5	12.1	 16
265	  9	64.0	9.2	 16
266	  9	356.8	50.5	 16
267	  9	336.0	61.1	 16
268	  9	114.0	20.4	 16
269	  9	648.5	122.8	 16
270	  9	64.0	9.9	 16
271	  9	67.3	9.7	 16
272	  9	72.5	15.7	 16
273	  9	95.5	17.3	 16
274	  9	103.3	14.6	 16
275	  9	108.5	18.4	 16
276	  9	55.3	9.7	 16
277	  9	73.3	13.4	 16
278	  9	112.3	19.2	 16
279	  9	253.8	31.4	 16
280	  9	96.3	15.4	 16
281	  9	102.0	21.5	 16
282	  9	146.8	20.3	 16
283	  9	63.8	13.4	 16
284	  9	91.8	17.4	 16
285	  9	71.3	10.6	 16
286	  9	75.5	14.3	 16
287	  9	66.8	15.3	 16
288	  9	91.3	11.5	 16
289	  9	429.0	68.5	 16
290	  9	204.8	26.7	 16
291	  9	174.0	18.8	 16
292	  9	632.5	125.4	 16
293	  9	126.5	20.1	 16
294	  9	1742.0	310.1	 16
295	  9	541.8	68.3	 16
296	  9	132.8	17.9	 16
297	  9	455.0	47.9	 16
298	  9	102.8	20.8	 16
299	  9	253.3	50.9	 16
300	  9	251.8	44.8	 16
301	  9	97.0	10.5	 16
302	  9	67.3	10.8	 16
303	  9	103.8	24.2	 16
304	  9	119.8	14.2	 16
305	  9	671.0	76.9	 16
306	  9	231.0	36.8	 16
307	  9	116.3	15.5	 16
308	  9	481.0	74.0	 16
309	  9	194.8	19.9	 16
310	  9	633.5	73.1	 16
311	  9	784.0	112.0	 16
312	  9	111.5	24.8	 16
313	  9	368.8	86.1	 16
314	  9	250.8	45.0	 16
315	  9	103.5	21.8	 16
316	  9	239.3	23.6	 16
317	  9	341.3	37.8	 16
318	  9	85.0	18.9	 16
319	  9	67.8	11.8	 16
320	  9	282.8	33.7	 16
321	  9	165.5	19.8	 16
322	  9	326.0	44.8	 16
323	  9	74.3	10.2	 16
324	  9	84.5	11.6	 16
325	  9	100.3	22.6	 16
326	  9	68.0	15.3	 16
327	  9	68.0	13.5	 16
328	  9	297.0	54.4	 20
329	  9	145.8	18.3	 16
330	  9	120.0	17.3	 16
331	  9	93.8	16.1	 16
332	  9	422.8	36.7	 16
333	  9	443.0	79.7	 16
334	  9	81.0	17.1	 16
335	  9	65.0	9.2	 16
336	  9	79.5	14.9	 16
337	  9	66.3	10.8	 16
338	  9	72.8	12.8	 16
339	  9	181.8	32.9	 16
340	  9	112.5	25.6	 16
341	  9	105.0	24.2	 16
342	  9	173.8	21.4	 16
343	  9	211.5	54.3	 16
344	  9	1104.3	200.7	 16
345	  9	70.8	15.8	 16
346	  9	2638.3	451.6	 16
347	  9	123.5	21.9	 16
348	  9	1548.0	191.4	 16
349	  9	123.5	19.3	 16
350	  9	1951.8	300.4	 16
351	  9	132.3	28.1	 16
352	  9	228.3	42.3	 16
353	  9	196.8	37.7	 16
354	  9	156.0	40.1	 16
355	  9	371.5	70.8	 16
356	  9	813.0	175.1	 16
357	  9	192.0	31.4	 16
358	  9	281.5	51.5	 16
359	  9	192.3	34.7	 16
360	  9	167.8	27.6	 16
361	  9	252.8	46.8	 16
362	  9	83.0	11.1	 16
363	  9	445.8	114.5	 16
364	  9	64.0	11.9	 16
365	  9	84.0	11.5	 16
366	  9	60.0	34.0	 16
367	  9	77.3	18.7	 16
368	  9	70.3	10.5	 16
369	  9	119.0	23.8	 16
370	  9	152.0	20.8	 16
371	  9	193.3	16.7	 16
372	  9	170.8	24.1	 16
373	  9	74.5	12.9	 16
374	  9	98.0	15.5	 16
375	  9	102.8	23.0	 16
376	  9	240.3	46.5	 16
377	  9	1513.8	131.8	 16
378	  9	5422.5	615.1	 16
379	  9	137.5	13.2	 16
380	  9	72.5	15.9	 16
381	  9	146.0	26.3	 16
382	  9	210.0	25.6	 16
383	  9	237.5	26.6	 16
384	  9	539.3	77.0	 16
385	  9	670.5	138.0	 16
386	  9	158.5	27.7	 16
387	  9	681.5	74.0	 16
388	  9	250.3	41.1	 16
389	  9	70.3	13.3	 16
390	  9	75.0	15.8	 16
391	  9	147.5	22.2	 16
392	  9	126.0	22.4	 16
393	  9	63.0	8.7	 16
394	  9	2933.5	387.5	 16
395	  9	130.5	19.0	 16
396	  9	70.8	11.9	 16
397	  9	68.3	12.1	 16
398	  9	113.5	15.7	 16
399	  9	63.0	11.5	 16
400	  9	65.3	10.9	 16
401	  9	72.8	14.7	 16
402	  9	61.5	10.2	 16
403	  9	103.0	71.6	 16
404	  9	86.5	32.0	 16
405	  9	108.0	16.6	 16
406	  9	67.8	7.9	 16
407	  9	150.8	17.4	 16
408	  9	82.8	16.5	 16
409	  9	103.3	18.5	 16
410	  9	71.5	15.1	 16
411	  9	200.8	23.5	 16
412	  9	189.5	27.7	 16
413	  9	153.5	16.7	 16
414	  9	111.5	20.6	 16
415	  9	363.0	39.0	 16
416	  9	88.5	12.8	 16
417	  9	157.8	21.8	 16
418	  9	64.0	9.7	 16
419	  9	325.5	38.1	 16
420	  9	679.0	53.7	 16
421	  9	93.5	15.8	 16
422	  9	60.0	6.8	 16
423	  9	1200.5	145.9	 16
424	  9	208.3	26.4	 16
425	  9	63.0	7.6	 16
426	  9	62.3	9.6	 16
427	  9	246.3	53.6	 16
428	  9	107.8	22.2	 16
429	  9	49.5	15.6	 16
430	  9	79.5	20.1	 16
431	  9	62.0	6.8	 16
432	  9	65.3	11.0	 16
433	  9	762.3	137.7	 16
434	  9	74.0	11.3	 16
435	  9	74.0	18.3	 16
436	  9	58.3	10.5	 16
437	  9	72.8	15.6	 16
438	  9	1831.3	388.1	 16
439	  9	118.0	10.4	 16
440	  9	203.0	14.1	 16
441	  9	152.3	18.6	 16
442	  9	1691.5	129.7	 16
443	  9	314.3	35.0	 16
444	  9	433.3	45.0	 16
445	  9	72.5	14.1	 16
446	  9	175.3	25.9	 16
447	  9	93.5	15.6	 20
448	  9	80.0	14.8	 16
449	  9	53.0	9.3	 16
450	  9	140.8	25.6	 16
451	  9	605.0	109.5	 16
452	  9	82.8	16.2	 16
453	  9	225.5	27.1	 16
454	  9	1125.8	190.9	 16
455	  9	178.8	26.9	 16
456	  9	137.0	31.9	 16
457	  9	57.5	9.0	 16
458	  9	66.5	11.8	 16
459	  9	66.0	10.0	 16
460	  9	510.3	84.6	 16
461	  9	75.3	13.2	 16
462	  9	85.0	13.2	 16
463	  9	269.3	43.6	 16
464	  9	76.0	17.5	 16
465	  9	174.5	30.9	 16
466	  9	245.5	40.2	 16
467	  9	62.3	10.5	 16
468	  9	66.5	23.6	 16
469	  9	195.8	21.5	 16
470	  9	172.8	30.9	 16
471	  9	77.8	11.3	 16
472	  9	159.0	16.3	 16
473	  9	113.8	19.6	 16
474	  9	329.8	67.3	 16
475	  9	166.8	218.5	 16
476	  9	79.0	19.8	 16
477	  9	64.3	8.6	 16
478	  9	163.5	40.0	 16
479	  9	63.5	10.0	 16
480	  9	209.8	47.8	 16
481	  9	98.0	28.1	 16
482	  9	67.3	10.6	 16
483	  9	77.0	14.0	 16
484	  9	401.0	60.7	 16
485	  9	98.3	16.7	 16
486	  9	1628.3	470.6	 16
487	  9	144.8	27.2	 16
488	  9	214.5	32.2	 16
489	  9	66.8	10.2	 16
490	  9	103.0	11.9	 16
491	  9	80.3	15.9	 16
492	  9	209.0	27.0	 16
493	  9	369.8	37.0	 16
494	  9	483.5	36.9	 16
495	  9	227.0	41.5	 16
496	  9	188.8	30.7	 16
497	  9	566.5	79.6	 16
498	  9	177.0	31.6	 16
499	  9	211.8	48.4	 16
500	  9	102.8	15.5	 16
501	  9	80.8	18.1	 16
502	  9	86.0	18.9	 16
503	  9	111.0	14.0	 16
504	  9	148.0	18.5	 16
505	  9	742.5	179.9	 16
506	  9	532.0	106.8	 16
507	  9	369.8	80.0	 16
508	  9	1278.8	318.2	 16
509	  9	66.0	13.4	 16
510	  9	520.5	73.5	 16
511	  9	123.5	20.8	 16
512	  9	64.3	9.8	 16
513	  9	128.0	23.9	 16
514	  9	339.3	38.2	 16
515	  9	56.8	13.2	 16
516	  9	121.8	25.3	 16
517	  9	60.5	10.9	 16
518	  9	71.0	18.8	 16
519	  9	199.8	21.9	 16
520	  9	339.3	47.7	 16
521	  9	69.0	10.6	 16
522	  9	74.5	12.9	 16
523	  9	65.3	13.0	 16
524	  9	62.8	10.0	 16
525	  9	100.3	16.7	 16
526	  9	131.8	20.3	 16
527	  9	102.8	18.8	 16
528	  9	71.0	16.8	 16
529	  9	86.5	8.8	 16
530	  9	241.3	57.2	 16
531	  9	83.0	13.4	 16
532	  9	76.0	13.3	 16
533	  9	63.0	10.1	 16
534	  9	57.0	10.4	 16
535	  9	94.5	16.8	 16
536	  9	76.8	21.0	 16
537	  9	134.0	24.7	 16
538	  9	84.8	16.2	 16
539	  9	88.5	13.9	 16
540	  9	429.0	53.8	 16
541	  9	104.5	20.3	 16
542	  9	60.3	9.5	 16
543	  9	100.8	15.8	 16
544	  9	82.8	11.7	 16
545	  9	543.8	61.2	 16
546	  9	127.3	26.2	 16
547	  9	144.5	21.2	 16
548	  9	174.3	24.2	 16
549	  9	106.3	16.3	 16
550	  9	158.3	24.5	 16
551	  9	269.3	32.2	 16
552	  9	138.0	28.0	 16
553	  9	249.5	35.9	 16
554	  9	122.8	14.5	 16
555	  9	60.0	10.9	 16
556	  9	124.8	40.9	 16
557	  9	85.5	14.3	 16
558	  9	68.8	13.1	 16
559	  9	91.5	13.7	 16
560	  9	71.3	13.8	 16
561	  9	317.3	27.8	 16
562	  9	70.3	13.5	 16
563	  9	117.8	20.8	 16
564	  9	308.8	45.0	 16
565	  9	415.0	68.8	 20
566	  9	1655.3	212.7	 16
567	  9	68.0	9.9	 16
568	  9	61.8	9.6	 16
569	  9	80.3	21.9	 16
570	  9	517.0	62.8	 16
571	  9	968.0	93.2	 16
572	  9	224.3	25.9	 16
573	  9	158.3	19.8	 16
574	  9	252.0	26.9	 16
575	  9	191.5	19.8	 16
576	  9	148.0	20.7	 16
577	  9	120.8	18.3	 16
578	  9	69.0	12.2	 16
579	  9	59.3	8.4	 16
580	  9	107.3	18.9	 16
581	  9	713.0	102.8	 16
582	  9	299.0	29.5	 16
583	  9	102.0	13.6	 16
584	  9	106.3	15.6	 16
585	  9	148.3	29.5	 16
586	  9	166.3	26.6	 16
587	  9	66.0	15.0	 16
588	  9	101.5	16.4	 16
589	  9	120.8	18.2	 16
590	  9	154.3	21.5	 16
591	  9	287.3	41.6	 16
592	  9	65.3	12.6	 16
593	  9	92.8	12.1	 16
594	  9	120.8	17.0	 16
595	  9	264.8	36.7	 16
596	  9	1172.5	156.3	 16
597	  9	1063.5	170.0	 16
598	  9	558.0	94.5	 16
599	  9	300.5	43.9	 16
600	  9	258.8	42.8	 16
601	  9	138.0	21.5	 16
602	  9	106.8	15.8	 16
603	  9	452.0	113.5	 16
604	  9	152.3	32.6	 16
605	  9	66.0	10.2	 16
606	  9	369.0	27.4	 16
607	  9	76.0	14.3	 16
608	  9	61.3	12.5	 16
609	  9	91.0	13.8	 16
610	  9	136.5	30.9	 16
611	  9	120.0	21.1	 16
612	  9	249.3	36.7	 16
613	  9	2137.0	199.3	 16
614	  9	110.5	23.6	 16
615	  9	127.5	17.8	 16
616	  9	134.0	24.9	 16
617	  9	542.8	72.5	 16
618	  9	139.0	18.8	 16
619	  9	76.5	15.4	 16
620	  9	210.0	22.6	 16
621	  9	128.5	21.1	 16
622	  9	94.0	15.9	 16
623	  9	263.3	52.9	 16
624	  9	342.3	71.4	 16
625	  9	113.5	26.7	 16
626	  9	62.0	10.7	 16
627	  9	207.0	27.3	 16
628	  9	94.0	15.2	 16
629	  9	73.3	14.0	 16
630	  9	215.5	32.2	 16
631	  9	201.8	34.4	 16
632	  9	1374.0	159.9	 16
633	  9	139.0	19.6	 16
634	  9	1144.3	124.7	 16
635	  9	1973.8	242.3	 16
636	  9	422.3	60.1	 16
637	  9	69.3	14.7	 16
638	  9	62.8	12.6	 16
639	  9	54.5	10.0	 16
640	  9	69.3	9.1	 16
641	  9	643.3	58.3	 16
642	  9	73.3	8.4	 16
643	  9	73.0	13.7	 16
644	  9	90.3	16.3	 16
645	  9	72.3	10.0	 16
646	  9	283.3	51.5	 16
647	  9	117.5	17.6	 16
648	  9	1359.3	221.8	 16
649	  9	62.5	14.0	 16
650	  9	65.8	7.3	 16
651	  9	55.5	8.4	 16
652	  9	193.8	33.7	 16
653	  9	496.0	67.6	 16
654	  9	158.0	17.7	 16
655	  9	231.0	26.6	 16
656	  9	74.0	11.8	 16
657	  9	267.8	39.9	 16
658	  9	223.8	31.3	 16
659	  9	253.5	37.8	 16
660	  9	123.3	19.1	 16
661	  9	112.0	17.9	 16
662	  9	64.3	19.1	 16
663	  9	289.3	43.3	 16
664	  9	124.8	15.3	 16
665	  9	95.8	17.7	 16
666	  9	122.3	23.2	 16
667	  9	336.3	36.6	 16
668	  9	551.0	60.7	 16
669	  9	231.0	25.7	 16
670	  9	124.5	15.2	 16
671	  9	829.3	134.1	 16
672	  9	234.0	31.9	 16
673	  9	134.0	23.5	 16
674	  9	185.3	29.0	 16
675	  9	82.0	13.2	 16
676	  9	98.0	13.7	 16
677	  9	216.0	28.5	 16
678	  9	112.8	21.8	 16
679	  9	129.0	25.2	 16
680	  9	840.0	135.8	 16
681	  9	6024.3	864.8	 16
682	  9	6231.0	481.6	 16
683	  9	5710.3	284.2	 16
684	  9	4813.0	766.4	 20
685	  9	264.8	24.4	 16
686	  9	261.0	42.2	 16
687	  9	75.0	11.9	 16
688	  9	67.0	12.1	 16
689	  9	74.5	14.3	 16
690	  9	63.8	12.2	 16
691	  9	204.5	19.6	 16
692	  9	67.3	13.8	 16
693	  9	182.0	21.4	 16
694	  9	121.0	18.9	 16
695	  9	78.3	9.9	 16
696	  9	94.5	18.0	 16
697	  9	379.0	37.6	 16
698	  9	1317.0	211.7	 16
699	  9	288.3	43.6	 16
700	  9	245.3	37.3	 16
701	  9	73.5	16.4	 16
702	  9	64.5	9.6	 16
703	  9	65.0	13.3	 16
704	  9	69.0	14.8	 16
705	  9	105.5	14.8	 16
706	  9	174.5	47.7	 16
707	  9	168.5	21.3	 16
708	  9	333.3	33.6	 16
709	  9	340.8	52.5	 16
710	  9	1216.8	170.3	 16
711	  9	93.5	16.7	 16
  0	 10	3854.0	718.9	 16
  1	 10	92.5	18.5	 16
  2	 10	82.5	14.1	 16
  3	 10	75.3	61.0	 16
  4	 10	76.3	11.8	 16
  5	 10	77.0	11.9	 16
  6	 10	136.3	25.8	 16
  7	 10	78.0	12.6	 16
  8	 10	73.3	12.0	 16
  9	 10	83.3	11.4	 16
 10	 10	114.3	20.1	 16
 11	 10	76.0	8.7	 16
 12	 10	5945.3	832.8	 16
 13	 10	107.3	15.1	 16
 14	 10	104.3	16.1	 16
 15	 10	111.8	10.8	 16
 16	 10	8184.3	972.2	 16
 17	 10	78.3	13.3	 16
 18	 10	7365.3	1012.5	 16
 19	 10	121.8	16.4	 16
 20	 10	124.5	36.1	 16
 21	 10	122.8	15.3	 16
 22	 10	101.3	12.8	 16
 23	 10	76.0	11.6	 16
 24	 10	6393.5	1072.5	 16
 25	 10	123.0	22.7	 16
 26	 10	97.3	13.9	 16
 27	 10	121.8	23.6	 16
 28	 10	8663.3	1136.9	 16
 29	 10	83.5	11.1	 16
 30	 10	7745.3	1204.6	 16
 31	 10	129.0	23.1	 16
 32	 10	129.0	19.2	 16
 33	 10	120.5	32.8	 16
 34	 10	111.5	16.3	 16
 35	 10	73.0	12.8	 16
 36	 10	5708.3	1062.9	 16
 37	 10	112.3	17.7	 16
 38	 10	105.3	14.0	 16
 39	 10	108.3	17.2	 16
 40	 10	7625.0	1248.2	 16
 41	 10	89.0	11.0	 16
 42	 10	6224.5	1053.7	 16
 43	 10	116.3	17.6	 16
 44	 10	104.8	14.1	 16
 45	 10	113.3	18.0	 16
 46	 10	7013.3	1056.3	 16
 47	 10	76.3	10.1	 16
 48	 10	111.3	18.5	 16
 49	 10	121.0	19.2	 16
 50	 10	6248.3	777.7	 16
 51	 10	117.8	24.2	 16
 52	 10	95.5	16.1	 16
 53	 10	72.3	10.6	 16
 54	 10	7328.3	1005.5	 16
 55	 10	139.0	26.0	 16
 56	 10	114.5	18.6	 16
 57	 10	96.0	15.4	 16
 58	 10	88.8	13.4	 16
 59	 10	57.3	9.0	 16
 60	 10	59.3	11.2	 16
 61	 10	65.8	10.5	 16
 62	 10	6581.0	777.1	 16
 63	 10	116.0	15.3	 16
 64	 10	124.8	152.5	 16
 65	 10	97.3	17.3	 16
 66	 10	8587.0	717.9	 16
 67	 10	76.0	12.1	 16
 68	 10	6143.3	616.4	 16
 69	 10	124.3	13.2	 16
 70	 10	104.0	14.3	 16
 71	 10	130.8	18.5	 16
 72	 10	6961.0	502.5	 16
 73	 10	111.8	17.9	 16
 74	 10	111.3	15.3	 16
 75	 10	88.0	13.2	 16
 76	 10	95.0	12.8	 16
 77	 10	104.0	20.7	 16
 78	 10	104.0	18.3	 16
 79	 10	73.8	7.8	 16
 80	 10	6040.8	379.5	 16
 81	 10	141.3	27.5	 16
 82	 10	99.5	16.7	 16
 83	 10	118.0	27.6	 16
 84	 10	6537.5	644.5	 16
 85	 10	97.0	37.4	 16
 86	 10	91.0	16.6	 16
 87	 10	101.0	17.8	 16
 88	 10	6284.5	673.6	 16
 89	 10	120.0	23.5	 16
 90	 10	95.5	11.5	 16
 91	 10	75.0	9.9	 16
 92	 10	5983.3	789.9	 16
 93	 10	124.0	33.4	 16
 94	 10	117.3	20.5	 20
 95	 10	6479.3	1255.7	 16
 96	 10	110.5	13.7	 16
 97	 10	66.8	10.4	 16
 98	 10	5938.8	1285.6	 16
 99	 10	113.8	16.1	 16
100	 10	96.0	18.4	 16
101	 10	6963.8	1236.2	 16
102	 10	101.8	14.5	 16
103	 10	78.0	12.6	 16
104	 10	6385.0	1209.7	 16
105	 10	114.8	25.8	 16
106	 10	93.8	17.5	 16
107	 10	100.5	15.6	 16
108	 10	7930.5	1290.7	 16
109	 10	63.3	10.5	 16
110	 10	53.5	8.9	 16
111	 10	177.5	23.8	 16
112	 10	468.3	59.1	 16
113	 10	166.3	27.3	 16
114	 10	253.0	36.3	 16
115	 10	89.5	15.7	 16
116	 10	68.3	14.6	 16
117	 10	72.8	12.7	 16
118	 10	83.5	8.5	 16
119	 10	130.3	15.1	 16
120	 10	103.5	18.0	 16
121	 10	86.3	14.6	 16
122	 10	66.3	10.7	 16
123	 10	82.3	14.5	 16
124	 10	156.0	32.3	 16
125	 10	84.0	21.0	 16
126	 10	78.8	14.3	 16
127	 10	83.5	21.1	 16
128	 10	65.0	16.2	 16
129	 10	74.3	13.7	 16
130	 10	101.8	19.0	 16
131	 10	106.3	13.9	 16
132	 10	132.3	29.3	 16
133	 10	80.5	14.8	 16
134	 10	102.0	16.9	 16
135	 10	56.8	20.7	 16
136	 10	65.5	9.7	 16
137	 10	76.3	11.7	 16
138	 10	65.0	13.1	 16
139	 10	72.3	10.3	 16
140	 10	68.5	12.0	 16
141	 10	76.3	14.6	 16
142	 10	96.3	21.4	 16
143	 10	350.5	44.5	 16
144	 10	166.5	21.5	 16
145	 10	81.0	14.3	 16
146	 10	86.5	21.3	 16
147	 10	67.5	17.1	 16
148	 10	90.5	14.7	 16
149	 10	74.8	16.0	 16
150	 10	97.3	15.5	 16
151	 10	69.8	11.9	 16
152	 10	2233.3	348.1	 16
153	 10	100.8	26.2	 16
154	 10	257.3	26.9	 16
155	 10	470.8	75.4	 16
156	 10	105.8	14.3	 16
157	 10	437.0	37.4	 16
158	 10	134.3	17.6	 16
159	 10	274.3	19.8	 16
160	 10	871.3	72.9	 16
161	 10	61.8	12.6	 16
162	 10	66.0	12.7	 16
163	 10	99.5	15.9	 16
164	 10	125.3	13.2	 16
165	 10	192.5	25.7	 16
166	 10	63.3	14.7	 16
167	 10	89.0	12.0	 16
168	 10	114.3	18.7	 16
169	 10	572.5	43.2	 16
170	 10	787.0	116.1	 16
171	 10	81.8	15.1	 16
172	 10	121.5	17.3	 16
173	 10	85.3	17.0	 16
174	 10	105.8	17.9	 16
175	 10	175.5	26.2	 16
176	 10	87.5	12.8	 16
177	 10	66.8	11.4	 16
178	 10	62.0	10.8	 16
179	 10	65.0	12.5	 16
180	 10	69.3	11.6	 16
181	 10	81.0	12.5	 16
182	 10	81.3	10.2	 16
183	 10	81.8	10.0	 16
184	 10	81.3	12.1	 16
185	 10	93.8	19.8	 16
186	 10	79.0	13.3	 16
187	 10	80.0	12.6	 16
188	 10	89.5	22.9	 16
189	 10	88.3	13.7	 16
190	 10	97.8	14.1	 16
191	 10	259.5	40.0	 16
192	 10	170.5	27.3	 16
193	 10	70.5	14.1	 16
194	 10	69.3	11.1	 16
195	 10	68.3	14.2	 16
196	 10	59.8	7.7	 16
197	 10	75.3	16.3	 16
198	 10	88.3	15.3	 16
199	 10	129.5	16.9	 16
200	 10	74.5	15.1	 16
201	 10	789.3	193.1	 16
202	 10	65.0	13.5	 16
203	 10	69.3	9.1	 16
204	 10	88.0	11.1	 16
205	 10	130.8	33.5	 16
206	 10	235.3	53.0	 16
207	 10	73.5	17.4	 16
208	 10	146.3	28.9	 16
209	 10	65.3	14.2	 16
210	 10	171.5	25.2	 16
211	 10	88.3	17.7	 16
212	 10	340.3	104.3	 16
213	 10	193.8	28.6	 20
214	 10	172.5	23.2	 16
215	 10	82.5	10.2	 16
216	 10	81.3	15.1	 16
217	 10	91.8	11.5	 16
218	 10	68.5	13.5	 16
219	 10	73.0	12.1	 16
220	 10	159.5	25.7	 16
221	 10	192.5	28.8	 16
222	 10	101.0	15.5	 16
223	 10	143.5	25.1	 16
224	 10	172.8	32.2	 16
225	 10	98.8	14.0	 16
226	 10	82.0	10.3	 16
227	 10	70.3	11.2	 16
228	 10	76.0	17.1	 16
229	 10	118.8	15.8	 16
230	 10	92.0	18.5	 16
231	 10	179.3	26.8	 16
232	 10	116.3	13.8	 16
233	 10	182.3	26.3	 16
234	 10	81.3	13.1	 16
235	 10	170.3	28.8	 16
236	 10	94.3	9.6	 16
237	 10	88.5	14.3	 16
238	 10	117.8	18.5	 16
239	 10	132.0	16.8	 16
240	 10	140.5	18.2	 16
241	 10	126.0	15.3	 16
242	 10	71.8	12.5	 16
243	 10	72.0	12.7	 16
244	 10	89.3	13.4	 16
245	 10	209.0	26.4	 16
246	 10	86.5	20.9	 16
247	 10	581.0	184.3	 16
248	 10	108.3	15.7	 16
249	 10	79.0	13.9	 16
250	 10	92.0	12.6	 16
251	 10	125.8	18.7	 16
252	 10	121.5	15.7	 16
253	 10	231.5	30.7	 16
254	 10	92.3	14.7	 16
255	 10	70.0	9.2	 16
256	 10	119.0	23.6	 16
257	 10	106.0	13.4	 16
258	 10	284.0	51.6	 16
259	 10	104.3	19.6	 16
260	 10	131.5	17.2	 16
261	 10	108.5	18.3	 16
262	 10	113.8	23.9	 16
263	 10	64.0	22.6	 16
264	 10	82.0	26.2	 16
265	 10	77.5	11.9	 16
266	 10	196.8	24.6	 16
267	 10	190.0	18.4	 16
268	 10	120.5	22.2	 16
269	 10	244.5	36.0	 16
270	 10	60.3	12.4	 16
271	 10	56.8	10.2	 16
272	 10	67.3	11.2	 16
273	 10	77.3	13.0	 16
274	 10	67.0	9.5	 16
275	 10	68.0	33.1	 16
276	 10	54.0	6.9	 16
277	 10	66.5	18.3	 16
278	 10	82.3	12.5	 16
279	 10	122.8	18.4	 16
280	 10	75.3	12.5	 16
281	 10	74.5	10.9	 16
282	 10	146.8	21.2	 16
283	 10	64.3	35.3	 16
284	 10	64.3	10.1	 16
285	 10	77.3	12.7	 16
286	 10	69.8	38.1	 16
287	 10	77.0	16.4	 16
288	 10	97.3	19.8	 16
289	 10	120.3	23.7	 16
290	 10	127.5	14.2	 16
291	 10	154.3	24.7	 16
292	 10	217.3	25.6	 16
293	 10	114.3	22.6	 16
294	 10	1831.0	150.6	 16
295	 10	715.3	81.3	 16
296	 10	118.5	22.2	 16
297	 10	561.8	50.5	 16
298	 10	170.0	23.1	 16
299	 10	94.0	22.3	 16
300	 10	68.8	10.5	 16
301	 10	102.5	27.8	 16
302	 10	79.3	13.8	 16
303	 10	74.3	9.3	 16
304	 10	157.3	20.4	 16
305	 10	323.3	34.6	 16
306	 10	77.5	14.5	 16
307	 10	118.0	15.7	 16
308	 10	134.8	24.1	 16
309	 10	131.0	39.3	 16
310	 10	204.0	28.7	 16
311	 10	159.8	16.8	 16
312	 10	78.3	13.5	 16
313	 10	108.5	26.2	 16
314	 10	112.8	21.0	 16
315	 10	65.5	12.2	 16
316	 10	170.8	28.7	 16
317	 10	982.0	49.2	 16
318	 10	66.0	9.5	 16
319	 10	85.3	18.0	 16
320	 10	118.0	21.0	 16
321	 10	101.3	15.4	 16
322	 10	283.8	34.2	 16
323	 10	70.5	10.7	 16
324	 10	167.8	87.0	 16
325	 10	70.5	10.7	 16
326	 10	62.0	6.2	 16
327	 10	69.5	13.0	 16
328	 10	234.5	31.3	 16
329	 10	113.8	24.1	 16
330	 10	86.5	14.5	 16
331	 10	80.3	15.7	 20
332	 10	306.5	51.9	 16
333	 10	262.3	25.6	 16
334	 10	130.8	19.1	 16
335	 10	59.3	8.4	 16
336	 10	72.5	13.0	 16
337	 10	61.0	11.3	 16
338	 10	84.5	10.0	 16
339	 10	133.8	18.7	 16
340	 10	125.3	24.2	 16
341	 10	57.8	12.1	 16
342	 10	111.5	20.0	 16
343	 10	75.5	15.1	 16
344	 10	273.8	55.0	 16
345	 10	73.8	14.6	 16
346	 10	364.5	58.7	 16
347	 10	94.3	12.2	 16
348	 10	991.3	143.0	 16
349	 10	83.0	13.2	 16
350	 10	354.8	68.1	 16
351	 10	103.8	18.0	 16
352	 10	119.3	23.9	 16
353	 10	98.5	13.4	 16
354	 10	84.3	16.4	 16
355	 10	163.3	21.3	 16
356	 10	226.5	28.3	 16
357	 10	111.5	16.7	 16
358	 10	70.8	15.2	 16
359	 10	110.0	19.2	 16
360	 10	68.8	11.1	 16
361	 10	147.0	25.1	 16
362	 10	70.5	11.9	 16
363	 10	122.0	25.2	 16
364	 10	60.0	6.6	 16
365	 10	61.0	13.1	 16
366	 10	57.3	9.3	 16
367	 10	52.0	9.0	 16
368	 10	73.0	15.7	 16
369	 10	106.3	10.1	 16
370	 10	148.3	26.5	 16
371	 10	109.3	19.6	 16
372	 10	72.8	11.3	 16
373	 10	66.0	13.7	 16
374	 10	73.0	16.3	 16
375	 10	81.3	16.5	 16
376	 10	134.3	25.8	 16
377	 10	454.5	41.4	 16
378	 10	740.0	101.7	 16
379	 10	107.8	37.0	 16
380	 10	58.3	13.4	 16
381	 10	71.3	15.5	 16
382	 10	93.3	10.6	 16
383	 10	193.8	25.9	 16
384	 10	173.5	31.1	 16
385	 10	165.0	23.3	 16
386	 10	200.8	32.5	 16
387	 10	177.0	28.9	 16
388	 10	74.8	15.0	 16
389	 10	80.0	11.0	 16
390	 10	87.5	11.9	 16
391	 10	109.3	17.8	 16
392	 10	96.0	11.8	 16
393	 10	62.5	9.7	 16
394	 10	909.5	140.1	 16
395	 10	200.5	32.9	 16
396	 10	66.0	12.6	 16
397	 10	74.0	17.5	 16
398	 10	90.5	12.4	 16
399	 10	78.3	14.1	 16
400	 10	61.5	12.4	 16
401	 10	92.3	14.7	 16
402	 10	72.5	16.3	 16
403	 10	74.5	14.0	 16
404	 10	101.0	16.3	 16
405	 10	107.3	16.5	 16
406	 10	70.8	15.1	 16
407	 10	72.3	13.8	 16
408	 10	72.8	8.9	 16
409	 10	106.5	21.3	 16
410	 10	56.8	7.8	 16
411	 10	349.5	34.0	 16
412	 10	145.3	16.5	 16
413	 10	96.5	18.5	 16
414	 10	157.5	19.0	 16
415	 10	73.3	11.2	 16
416	 10	114.0	17.3	 16
417	 10	68.0	9.1	 16
418	 10	61.5	12.6	 16
419	 10	104.3	17.9	 16
420	 10	221.8	34.3	 16
421	 10	86.5	12.3	 16
422	 10	55.0	8.3	 16
423	 10	152.0	27.8	 16
424	 10	88.0	10.3	 16
425	 10	68.8	15.4	 16
426	 10	66.5	9.6	 16
427	 10	77.0	16.5	 16
428	 10	110.8	49.5	 16
429	 10	71.3	11.3	 16
430	 10	60.3	10.9	 16
431	 10	65.8	10.8	 16
432	 10	64.5	8.3	 16
433	 10	84.5	17.4	 16
434	 10	60.0	9.2	 16
435	 10	61.5	14.2	 16
436	 10	67.0	14.3	 16
437	 10	59.0	12.7	 16
438	 10	927.0	108.6	 16
439	 10	101.3	21.4	 16
440	 10	106.0	21.8	 16
441	 10	93.0	18.4	 16
442	 10	314.8	46.5	 16
443	 10	142.3	23.9	 16
444	 10	79.5	11.2	 16
445	 10	81.3	14.2	 16
446	 10	67.5	14.8	 16
447	 10	52.3	9.1	 16
448	 10	77.5	16.6	 16
449	 10	70.3	19.1	 16
450	 10	129.5	30.2	 20
451	 10	119.3	23.4	 16
452	 10	108.3	15.2	 16
453	 10	190.8	37.5	 16
454	 10	822.3	135.0	 16
455	 10	126.3	23.5	 16
456	 10	108.0	18.5	 16
457	 10	57.0	9.7	 16
458	 10	81.3	12.1	 16
459	 10	57.8	14.8	 16
460	 10	332.3	74.3	 16
461	 10	69.5	13.8	 16
462	 10	72.5	13.5	 16
463	 10	86.3	17.9	 16
464	 10	65.0	14.6	 16
465	 10	71.3	14.7	 16
466	 10	311.5	55.9	 16
467	 10	59.0	8.1	 16
468	 10	52.5	11.5	 16
469	 10	72.5	16.7	 16
470	 10	81.5	43.5	 16
471	 10	73.0	10.1	 16
472	 10	149.3	19.6	 16
473	 10	86.0	21.3	 16
474	 10	85.0	10.9	 16
475	 10	66.5	13.6	 16
476	 10	58.3	11.2	 16
477	 10	73.8	14.7	 16
478	 10	69.0	13.5	 16
479	 10	62.0	9.6	 16
480	 10	89.0	10.9	 16
481	 10	70.0	15.2	 16
482	 10	80.5	16.3	 16
483	 10	79.3	48.8	 16
484	 10	164.8	31.5	 16
485	 10	80.0	13.3	 16
486	 10	344.3	62.1	 16
487	 10	79.8	16.5	 16
488	 10	77.3	10.2	 16
489	 10	71.3	10.9	 16
490	 10	74.0	10.5	 16
491	 10	58.8	11.3	 16
492	 10	84.0	10.1	 16
493	 10	317.5	35.4	 16
494	 10	614.0	45.9	 16
495	 10	262.0	35.1	 16
496	 10	245.8	28.8	 16
497	 10	541.5	50.6	 16
498	 10	263.3	27.7	 16
499	 10	306.0	45.5	 16
500	 10	62.3	12.1	 16
501	 10	62.0	8.6	 16
502	 10	65.0	11.4	 16
503	 10	97.8	15.9	 16
504	 10	115.3	14.3	 16
505	 10	132.0	29.6	 16
506	 10	843.5	75.2	 16
507	 10	101.0	9.8	 16
508	 10	407.3	65.4	 16
509	 10	63.3	16.6	 16
510	 10	133.3	15.8	 16
511	 10	89.3	16.6	 16
512	 10	60.0	7.0	 16
513	 10	61.3	7.9	 16
514	 10	110.5	12.4	 16
515	 10	61.3	10.7	 16
516	 10	58.3	13.3	 16
517	 10	72.8	13.1	 16
518	 10	66.5	16.6	 16
519	 10	90.0	19.9	 16
520	 10	98.0	14.4	 16
521	 10	66.8	13.7	 16
522	 10	99.0	20.7	 16
523	 10	59.3	8.4	 16
524	 10	58.8	11.0	 16
525	 10	93.0	13.9	 16
526	 10	86.0	12.9	 16
527	 10	94.0	10.4	 16
528	 10	69.5	13.2	 16
529	 10	76.8	17.3	 16
530	 10	180.5	19.5	 16
531	 10	69.5	11.3	 16
532	 10	61.0	9.9	 16
533	 10	77.3	11.9	 16
534	 10	64.5	14.2	 16
535	 10	85.3	12.0	 16
536	 10	80.0	12.4	 16
537	 10	79.5	11.9	 16
538	 10	68.8	14.4	 16
539	 10	70.0	10.4	 16
540	 10	115.0	18.6	 16
541	 10	74.3	11.2	 16
542	 10	68.0	15.9	 16
543	 10	123.3	94.0	 16
544	 10	72.5	13.6	 16
545	 10	106.0	22.0	 16
546	 10	179.5	27.4	 16
547	 10	275.3	30.4	 16
548	 10	92.5	15.5	 16
549	 10	107.5	13.1	 16
550	 10	97.5	13.5	 16
551	 10	376.5	38.9	 16
552	 10	213.0	25.1	 16
553	 10	196.8	25.6	 16
554	 10	106.3	33.8	 16
555	 10	62.0	8.9	 16
556	 10	66.3	8.2	 16
557	 10	82.8	13.7	 16
558	 10	72.8	11.4	 16
559	 10	75.0	8.1	 16
560	 10	67.3	15.3	 16
561	 10	176.3	30.2	 16
562	 10	69.5	13.5	 16
563	 10	89.8	12.9	 16
564	 10	112.0	16.5	 16
565	 10	162.3	20.2	 16
566	 10	445.8	103.4	 16
567	 10	73.5	12.3	 16
568	 10	56.8	8.9	 16
569	 10	159.8	32.6	 20
570	 10	226.8	27.9	 16
571	 10	402.5	42.2	 16
572	 10	263.0	35.8	 16
573	 10	108.0	22.5	 16
574	 10	187.3	19.0	 16
575	 10	185.5	15.0	 16
576	 10	138.3	21.6	 16
577	 10	104.0	12.2	 16
578	 10	69.0	11.9	 16
579	 10	55.5	32.5	 16
580	 10	89.3	14.2	 16
581	 10	107.0	18.1	 16
582	 10	147.3	29.1	 16
583	 10	71.5	12.8	 16
584	 10	68.3	10.2	 16
585	 10	99.3	16.0	 16
586	 10	67.0	12.0	 16
587	 10	57.0	11.2	 16
588	 10	96.0	19.5	 16
589	 10	98.0	17.2	 16
590	 10	85.3	15.8	 16
591	 10	85.5	13.5	 16
592	 10	61.0	9.3	 16
593	 10	77.5	16.5	 16
594	 10	90.3	9.9	 16
595	 10	147.5	20.9	 16
596	 10	151.5	19.5	 16
597	 10	151.5	21.1	 16
598	 10	146.3	24.9	 16
599	 10	196.3	25.6	 16
600	 10	219.8	32.4	 16
601	 10	104.0	12.4	 16
602	 10	100.0	18.2	 16
603	 10	105.5	19.0	 16
604	 10	62.8	41.8	 16
605	 10	72.0	10.3	 16
606	 10	262.8	26.4	 16
607	 10	78.3	11.3	 16
608	 10	73.8	13.7	 16
609	 10	66.0	10.8	 16
610	 10	176.5	23.4	 16
611	 10	158.0	26.0	 16
612	 10	91.0	15.0	 16
613	 10	341.5	42.4	 16
614	 10	85.3	19.0	 16
615	 10	79.5	9.6	 16
616	 10	98.3	15.8	 16
617	 10	208.5	31.2	 16
618	 10	149.8	29.9	 16
619	 10	63.0	9.9	 16
620	 10	94.0	17.8	 16
621	 10	91.8	18.4	 16
622	 10	62.5	8.5	 16
623	 10	91.8	15.3	 16
624	 10	64.3	11.8	 16
625	 10	75.3	13.5	 16
626	 10	60.5	11.0	 16
627	 10	78.5	13.8	 16
628	 10	154.3	23.0	 16
629	 10	86.5	15.6	 16
630	 10	135.0	15.3	 16
631	 10	312.5	38.8	 16
632	 10	163.3	26.8	 16
633	 10	108.3	22.0	 16
634	 10	573.5	51.8	 16
635	 10	269.3	32.2	 16
636	 10	100.8	17.0	 16
637	 10	65.3	14.1	 16
638	 10	62.3	12.1	 16
639	 10	54.5	7.6	 16
640	 10	63.0	8.3	 16
641	 10	615.5	51.4	 16
642	 10	56.0	7.7	 16
643	 10	61.3	12.4	 16
644	 10	170.0	24.4	 16
645	 10	76.5	11.7	 16
646	 10	99.0	16.5	 16
647	 10	136.0	20.6	 16
648	 10	290.0	48.2	 16
649	 10	64.0	13.2	 16
650	 10	57.5	10.9	 16
651	 10	59.0	11.6	 16
652	 10	87.5	20.9	 16
653	 10	239.5	37.3	 16
654	 10	95.0	13.2	 16
655	 10	106.0	15.5	 16
656	 10	67.8	13.0	 16
657	 10	75.8	12.0	 16
658	 10	362.0	44.7	 16
659	 10	81.3	14.1	 16
660	 10	93.3	81.0	 16
661	 10	70.3	11.8	 16
662	 10	62.3	13.2	 16
663	 10	218.5	29.3	 16
664	 10	87.0	14.0	 16
665	 10	107.3	16.9	 16
666	 10	82.5	12.1	 16
667	 10	386.0	42.5	 16
668	 10	223.3	27.8	 16
669	 10	197.8	22.5	 16
670	 10	222.5	36.4	 16
671	 10	160.8	26.9	 16
672	 10	188.0	27.6	 16
673	 10	131.5	17.4	 16
674	 10	95.3	15.6	 16
675	 10	128.8	33.3	 16
676	 10	130.3	19.6	 16
677	 10	143.3	17.8	 16
678	 10	72.5	10.7	 16
679	 10	68.0	11.0	 16
680	 10	525.5	66.9	 16
681	 10	1461.5	277.7	 16
682	 10	1644.8	293.0	 16
683	 10	1514.0	194.4	 16
684	 10	1109.3	187.9	 16
685	 10	138.0	17.7	 16
686	 10	117.3	20.3	 16
687	 10	117.3	16.0	 20
688	 10	75.3	22.7	 16
689	 10	72.3	18.0	 16
690	 10	60.8	11.6	 16
691	 10	175.3	42.7	 16
692	 10	70.3	11.5	 16
693	 10	77.3	16.2	 16
694	 10	75.5	12.1	 16
695	 10	73.5	15.4	 16
696	 10	75.8	14.1	 16
697	 10	136.3	26.4	 16
698	 10	292.5	68.9	 16
699	 10	137.5	19.8	 16
700	 10	114.3	24.0	 16
701	 10	84.5	17.8	 16
702	 10	70.3	13.9	 16
703	 10	55.3	9.7	 16
704	 10	65.3	16.4	 16
705	 10	95.5	15.6	 16
706	 10	78.8	15.1	 16
707	 10	128.5	18.8	 16
708	 10	290.5	28.9	 16
709	 10	374.5	62.5	 16
710	 10	224.0	36.2	 16
711	 10	7656.0	870.0	 16
  0	 11	111.0	17.4	 16
  1	 11	90.5	15.3	 16
  2	 11	73.8	15.3	 16
  3	 11	85.5	11.2	 16
  4	 11	71.5	13.0	 16
  5	 11	411.0	75.4	 16
  6	 11	84.5	16.3	 16
  7	 11	271.3	50.9	 16
  8	 11	147.0	27.8	 16
  9	 11	88.5	13.3	 16
 10	 11	91.0	9.3	 16
 11	 11	58.5	12.4	 16
 12	 11	108.0	22.0	 16
 13	 11	6927.5	731.1	 16
 14	 11	7668.5	649.2	 16
 15	 11	7827.8	1089.0	 16
 16	 11	110.8	16.3	 16
 17	 11	58.0	8.0	 16
 18	 11	108.3	12.4	 16
 19	 11	7385.0	939.0	 16
 20	 11	7666.0	998.8	 16
 21	 11	7495.8	1425.4	 16
 22	 11	115.3	16.1	 16
 23	 11	67.3	11.9	 16
 24	 11	6141.5	1027.5	 16
 25	 11	101.5	18.7	 16
 26	 11	101.0	11.7	 16
 27	 11	157.3	91.3	 16
 28	 11	8679.3	1299.3	 16
 29	 11	68.3	10.3	 16
 30	 11	114.0	24.9	 16
 31	 11	7141.0	1706.8	 16
 32	 11	7681.0	1900.7	 16
 33	 11	7656.3	2232.1	 16
 34	 11	109.0	20.2	 16
 35	 11	61.0	12.0	 16
 36	 11	100.8	23.4	 16
 37	 11	6524.8	571.2	 16
 38	 11	7560.0	598.2	 16
 39	 11	7602.8	1273.4	 16
 40	 11	111.3	16.2	 16
 41	 11	66.5	14.8	 16
 42	 11	6232.0	1085.0	 16
 43	 11	87.5	11.2	 16
 44	 11	99.5	15.3	 16
 45	 11	110.5	21.2	 16
 46	 11	7264.0	1043.5	 16
 47	 11	74.8	11.8	 16
 48	 11	106.5	14.9	 16
 49	 11	98.8	18.5	 16
 50	 11	6465.5	821.0	 16
 51	 11	103.5	18.2	 16
 52	 11	97.5	19.6	 16
 53	 11	64.8	15.4	 16
 54	 11	6795.8	1007.2	 16
 55	 11	105.8	24.2	 16
 56	 11	93.5	12.1	 16
 57	 11	71.3	15.5	 16
 58	 11	86.3	13.5	 16
 59	 11	52.5	11.0	 16
 60	 11	58.5	8.7	 16
 61	 11	63.0	11.0	 16
 62	 11	6228.0	791.5	 16
 63	 11	88.3	12.1	 16
 64	 11	96.5	14.9	 16
 65	 11	98.8	18.3	 16
 66	 11	8759.0	859.7	 16
 67	 11	76.3	10.6	 16
 68	 11	111.3	19.7	 16
 69	 11	7034.5	1014.5	 16
 70	 11	7880.0	1134.3	 16
 71	 11	7600.8	1177.3	 16
 72	 11	187.5	42.3	 16
 73	 11	123.8	19.5	 16
 74	 11	123.0	22.8	 16
 75	 11	103.0	20.1	 16
 76	 11	86.3	10.4	 16
 77	 11	93.3	25.2	 16
 78	 11	91.3	15.4	 16
 79	 11	67.3	18.1	 16
 80	 11	137.5	24.6	 16
 81	 11	6946.0	1844.2	 16
 82	 11	7569.3	2029.7	 16
 83	 11	7618.3	547.6	 16
 84	 11	114.5	20.4	 16
 85	 11	60.5	12.6	 16
 86	 11	93.3	20.8	 16
 87	 11	7095.3	885.8	 16
 88	 11	7779.8	639.9	 16
 89	 11	7176.3	534.0	 16
 90	 11	111.3	19.1	 16
 91	 11	66.3	10.1	 16
 92	 11	108.0	18.5	 16
 93	 11	7060.3	1092.7	 16
 94	 11	7132.3	796.8	 16
 95	 11	112.8	18.5	 16
 96	 11	94.3	18.3	 16
 97	 11	62.5	12.0	 20
 98	 11	120.5	21.1	 16
 99	 11	7104.8	1117.2	 16
100	 11	6958.3	1591.3	 16
101	 11	115.0	24.1	 16
102	 11	89.3	17.2	 16
103	 11	65.3	13.8	 16
104	 11	6168.5	1171.1	 16
105	 11	105.0	21.0	 16
106	 11	78.0	11.0	 16
107	 11	96.3	15.9	 16
108	 11	8138.0	1536.8	 16
109	 11	59.8	17.0	 16
110	 11	63.3	10.2	 16
111	 11	120.0	24.5	 16
112	 11	741.3	166.4	 16
113	 11	101.3	18.6	 16
114	 11	141.3	29.9	 16
115	 11	160.5	28.3	 16
116	 11	137.3	18.5	 16
117	 11	79.8	15.7	 16
118	 11	62.0	8.8	 16
119	 11	156.3	20.3	 16
120	 11	172.3	24.2	 16
121	 11	231.3	41.6	 16
122	 11	410.8	87.1	 16
123	 11	1185.3	283.6	 16
124	 11	206.5	43.6	 16
125	 11	97.0	34.0	 16
126	 11	118.0	18.1	 16
127	 11	283.3	63.7	 16
128	 11	74.5	10.2	 16
129	 11	131.3	20.7	 16
130	 11	2354.3	685.4	 16
131	 11	100.0	17.1	 16
132	 11	125.5	28.9	 16
133	 11	100.0	17.6	 16
134	 11	223.3	36.7	 16
135	 11	134.8	18.6	 16
136	 11	66.5	13.2	 16
137	 11	85.5	54.6	 16
138	 11	62.5	10.7	 16
139	 11	128.3	27.8	 16
140	 11	63.8	12.2	 16
141	 11	103.0	21.2	 16
142	 11	993.5	165.4	 16
143	 11	873.3	148.6	 16
144	 11	69.3	10.5	 16
145	 11	67.3	9.7	 16
146	 11	322.5	48.6	 16
147	 11	60.8	12.2	 16
148	 11	77.0	13.6	 16
149	 11	130.5	25.1	 16
150	 11	108.0	15.9	 16
151	 11	111.0	17.7	 16
152	 11	169.3	23.6	 16
153	 11	2524.0	587.6	 16
154	 11	3669.0	340.1	 16
155	 11	896.8	127.6	 16
156	 11	73.0	10.7	 16
157	 11	425.0	46.9	 16
158	 11	651.0	67.6	 16
159	 11	202.5	26.5	 16
160	 11	75.8	13.1	 16
161	 11	643.0	80.3	 16
162	 11	78.5	12.2	 16
163	 11	59.0	8.0	 16
164	 11	57.3	10.8	 16
165	 11	82.5	15.4	 16
166	 11	646.8	120.7	 16
167	 11	70.5	12.1	 16
168	 11	91.8	19.0	 16
169	 11	66.5	12.4	 16
170	 11	487.0	107.2	 16
171	 11	72.3	11.5	 16
172	 11	93.0	15.8	 16
173	 11	119.3	17.3	 16
174	 11	179.8	31.1	 16
175	 11	218.0	47.0	 16
176	 11	115.0	10.7	 16
177	 11	110.3	17.3	 16
178	 11	247.8	38.3	 16
179	 11	134.0	20.4	 16
180	 11	84.8	13.9	 16
181	 11	552.3	101.5	 16
182	 11	373.3	42.9	 16
183	 11	73.3	11.6	 16
184	 11	76.5	14.3	 16
185	 11	72.8	14.4	 16
186	 11	67.3	12.2	 16
187	 11	400.3	47.5	 16
188	 11	380.3	84.3	 16
189	 11	334.8	36.5	 16
190	 11	144.5	21.1	 16
191	 11	119.5	19.1	 16
192	 11	144.5	22.1	 16
193	 11	57.0	9.5	 16
194	 11	109.5	20.0	 16
195	 11	79.5	15.3	 16
196	 11	352.5	51.6	 16
197	 11	115.8	22.2	 16
198	 11	273.8	61.2	 16
199	 11	255.5	33.4	 16
200	 11	79.8	13.3	 16
201	 11	80.3	15.2	 16
202	 11	1190.5	142.6	 16
203	 11	80.8	11.2	 16
204	 11	58.5	10.0	 16
205	 11	68.5	13.3	 16
206	 11	81.8	11.0	 16
207	 11	68.3	12.9	 16
208	 11	185.8	41.9	 16
209	 11	287.5	52.7	 16
210	 11	157.0	28.1	 16
211	 11	77.8	13.7	 16
212	 11	107.3	17.5	 16
213	 11	221.3	36.8	 16
214	 11	161.3	16.4	 16
215	 11	489.5	34.7	 16
216	 11	264.3	31.6	 20
217	 11	100.0	15.0	 16
218	 11	137.3	19.2	 16
219	 11	143.3	22.4	 16
220	 11	79.0	12.4	 16
221	 11	362.3	75.3	 16
222	 11	1336.0	389.0	 16
223	 11	143.3	31.8	 16
224	 11	133.0	26.1	 16
225	 11	594.8	98.8	 16
226	 11	248.5	31.2	 16
227	 11	67.8	12.5	 16
228	 11	90.3	9.7	 16
229	 11	162.0	25.2	 16
230	 11	197.0	22.4	 16
231	 11	287.3	35.6	 16
232	 11	203.8	32.0	 16
233	 11	110.0	18.3	 16
234	 11	92.0	10.2	 16
235	 11	172.0	24.2	 16
236	 11	253.3	27.7	 16
237	 11	104.0	18.2	 16
238	 11	108.5	14.9	 16
239	 11	160.0	28.8	 16
240	 11	1089.3	253.7	 16
241	 11	149.0	20.5	 16
242	 11	570.3	153.7	 16
243	 11	60.8	11.7	 16
244	 11	68.5	15.2	 16
245	 11	188.5	34.5	 16
246	 11	81.3	15.0	 16
247	 11	73.0	12.3	 16
248	 11	738.8	198.2	 16
249	 11	127.8	20.9	 16
250	 11	423.5	76.2	 16
251	 11	88.8	12.4	 16
252	 11	85.3	13.5	 16
253	 11	102.5	11.9	 16
254	 11	85.0	16.2	 16
255	 11	72.0	9.0	 16
256	 11	78.0	13.7	 16
257	 11	71.0	15.0	 16
258	 11	202.3	28.6	 16
259	 11	157.8	24.3	 16
260	 11	80.3	9.1	 16
261	 11	71.0	13.3	 16
262	 11	79.3	9.7	 16
263	 11	169.8	25.2	 16
264	 11	67.8	14.1	 16
265	 11	80.8	12.2	 16
266	 11	230.3	25.8	 16
267	 11	166.0	25.9	 16
268	 11	181.5	29.1	 16
269	 11	178.3	34.0	 16
270	 11	166.3	27.4	 16
271	 11	292.8	34.2	 16
272	 11	59.5	6.7	 16
273	 11	84.3	14.8	 16
274	 11	199.8	16.8	 16
275	 11	113.3	23.4	 16
276	 11	117.0	23.1	 16
277	 11	187.0	36.5	 16
278	 11	633.3	73.5	 16
279	 11	609.5	73.8	 16
280	 11	183.8	24.7	 16
281	 11	102.3	17.9	 16
282	 11	212.0	32.5	 16
283	 11	164.8	33.3	 16
284	 11	66.0	15.8	 16
285	 11	89.0	17.8	 16
286	 11	319.5	50.1	 16
287	 11	353.0	54.2	 16
288	 11	1430.8	267.6	 16
289	 11	393.8	64.5	 16
290	 11	73.0	15.9	 16
291	 11	111.3	15.0	 16
292	 11	264.8	35.0	 16
293	 11	371.5	71.7	 16
294	 11	119.5	22.0	 16
295	 11	391.3	58.9	 16
296	 11	639.3	102.8	 16
297	 11	1746.3	196.3	 16
298	 11	70.5	12.1	 16
299	 11	234.0	33.6	 16
300	 11	226.5	27.7	 16
301	 11	94.0	18.3	 16
302	 11	101.5	17.4	 16
303	 11	176.3	28.8	 16
304	 11	201.8	41.8	 16
305	 11	478.8	40.4	 16
306	 11	131.3	21.7	 16
307	 11	118.5	17.2	 16
308	 11	220.3	27.1	 16
309	 11	361.8	53.1	 16
310	 11	78.5	13.8	 16
311	 11	88.5	16.3	 16
312	 11	90.3	15.3	 16
313	 11	215.0	29.7	 16
314	 11	309.5	63.5	 16
315	 11	74.5	12.3	 16
316	 11	64.3	9.8	 16
317	 11	91.8	17.5	 16
318	 11	77.0	14.6	 16
319	 11	58.3	11.6	 16
320	 11	252.8	32.0	 16
321	 11	104.3	18.6	 16
322	 11	76.8	10.9	 16
323	 11	890.0	68.3	 16
324	 11	169.0	28.2	 16
325	 11	154.8	19.9	 16
326	 11	324.0	53.4	 16
327	 11	101.5	15.7	 16
328	 11	87.8	28.3	 16
329	 11	90.5	15.5	 16
330	 11	493.5	57.0	 16
331	 11	104.8	19.2	 16
332	 11	68.0	14.8	 16
333	 11	81.3	16.8	 16
334	 11	66.3	13.2	 20
335	 11	144.8	30.0	 16
336	 11	64.0	11.3	 16
337	 11	105.5	19.3	 16
338	 11	57.5	8.7	 16
339	 11	182.0	43.9	 16
340	 11	189.8	41.4	 16
341	 11	237.0	52.7	 16
342	 11	279.0	54.7	 16
343	 11	67.0	14.9	 16
344	 11	224.3	30.2	 16
345	 11	84.0	11.4	 16
346	 11	62.0	10.8	 16
347	 11	55.8	12.0	 16
348	 11	58.8	11.4	 16
349	 11	64.0	11.0	 16
350	 11	377.8	65.9	 16
351	 11	76.5	14.2	 16
352	 11	95.8	16.0	 16
353	 11	78.8	11.5	 16
354	 11	132.8	18.9	 16
355	 11	457.3	76.4	 16
356	 11	395.5	69.8	 16
357	 11	312.8	61.1	 16
358	 11	394.3	77.4	 16
359	 11	73.8	10.7	 16
360	 11	95.3	12.4	 16
361	 11	330.8	98.7	 16
362	 11	74.0	16.9	 16
363	 11	103.3	20.6	 16
364	 11	143.0	26.4	 16
365	 11	67.0	9.7	 16
366	 11	88.8	27.7	 16
367	 11	89.3	16.9	 16
368	 11	154.8	19.2	 16
369	 11	115.0	21.8	 16
370	 11	194.0	30.5	 16
371	 11	283.5	46.3	 16
372	 11	109.0	17.5	 16
373	 11	141.3	19.4	 16
374	 11	160.3	25.9	 16
375	 11	289.0	26.2	 16
376	 11	95.8	43.2	 16
377	 11	81.0	14.5	 16
378	 11	299.5	33.1	 16
379	 11	76.0	12.3	 16
380	 11	83.5	13.4	 16
381	 11	132.0	21.6	 16
382	 11	74.3	14.9	 16
383	 11	163.3	22.0	 16
384	 11	74.3	11.7	 16
385	 11	134.5	19.6	 16
386	 11	109.3	13.3	 16
387	 11	123.3	22.0	 16
388	 11	63.0	12.1	 16
389	 11	64.3	11.6	 16
390	 11	125.0	18.8	 16
391	 11	107.5	34.6	 16
392	 11	70.8	14.6	 16
393	 11	173.8	29.2	 16
394	 11	86.3	19.9	 16
395	 11	122.8	26.7	 16
396	 11	258.8	26.6	 16
397	 11	824.5	50.6	 16
398	 11	246.5	33.8	 16
399	 11	277.8	32.1	 16
400	 11	115.0	40.9	 16
401	 11	264.8	34.2	 16
402	 11	75.8	10.6	 16
403	 11	174.8	47.7	 16
404	 11	63.3	8.4	 16
405	 11	92.5	24.3	 16
406	 11	285.0	49.2	 16
407	 11	60.0	11.9	 16
408	 11	66.3	11.9	 16
409	 11	83.5	19.4	 16
410	 11	112.8	15.1	 16
411	 11	90.8	16.5	 16
412	 11	107.8	28.6	 16
413	 11	91.5	18.4	 16
414	 11	62.5	11.0	 16
415	 11	905.8	88.0	 16
416	 11	194.0	16.6	 16
417	 11	236.5	27.0	 16
418	 11	221.3	21.4	 16
419	 11	100.8	17.2	 16
420	 11	59.3	11.8	 16
421	 11	110.0	18.9	 16
422	 11	92.5	16.3	 16
423	 11	255.5	38.3	 16
424	 11	225.3	14.2	 16
425	 11	979.5	87.4	 16
426	 11	125.5	20.2	 16
427	 11	79.0	14.1	 16
428	 11	127.0	18.1	 16
429	 11	102.0	20.5	 16
430	 11	234.5	47.0	 16
431	 11	61.3	12.2	 16
432	 11	151.5	24.4	 16
433	 11	78.5	10.6	 16
434	 11	67.0	16.7	 16
435	 11	213.0	32.9	 16
436	 11	207.5	44.6	 16
437	 11	286.5	58.2	 16
438	 11	2553.0	563.0	 16
439	 11	164.5	25.7	 16
440	 11	91.5	13.6	 16
441	 11	160.0	19.0	 16
442	 11	116.3	14.4	 16
443	 11	280.0	30.5	 16
444	 11	68.8	11.5	 16
445	 11	228.5	29.6	 16
446	 11	91.3	14.8	 16
447	 11	130.5	21.8	 16
448	 11	61.5	10.3	 16
449	 11	72.0	12.8	 16
450	 11	178.3	27.3	 16
451	 11	146.3	17.5	 16
452	 11	125.3	52.0	 16
453	 11	68.5	11.9	 20
454	 11	100.0	24.7	 16
455	 11	317.0	76.2	 16
456	 11	129.3	35.5	 16
457	 11	175.5	42.9	 16
458	 11	148.8	23.7	 16
459	 11	180.8	32.5	 16
460	 11	188.8	48.8	 16
461	 11	70.0	18.0	 16
462	 11	84.5	15.3	 16
463	 11	297.0	36.6	 16
464	 11	175.3	30.9	 16
465	 11	70.0	9.9	 16
466	 11	90.5	14.2	 16
467	 11	66.3	11.6	 16
468	 11	172.5	17.7	 16
469	 11	595.8	101.4	 16
470	 11	118.5	17.9	 16
471	 11	186.0	28.1	 16
472	 11	216.8	30.6	 16
473	 11	85.8	11.4	 16
474	 11	76.0	13.7	 16
475	 11	78.3	26.7	 16
476	 11	141.8	27.8	 16
477	 11	72.8	20.0	 16
478	 11	124.8	18.3	 16
479	 11	216.5	49.7	 16
480	 11	102.0	17.8	 16
481	 11	498.3	97.1	 16
482	 11	132.3	21.1	 16
483	 11	153.5	34.9	 16
484	 11	60.5	9.3	 16
485	 11	79.8	15.8	 16
486	 11	556.3	148.3	 16
487	 11	211.8	41.8	 16
488	 11	120.8	25.8	 16
489	 11	68.5	11.8	 16
490	 11	88.0	14.6	 16
491	 11	69.3	14.6	 16
492	 11	116.0	21.2	 16
493	 11	106.5	21.6	 16
494	 11	340.8	42.5	 16
495	 11	88.8	20.4	 16
496	 11	575.0	51.1	 16
497	 11	606.8	66.9	 16
498	 11	554.3	36.2	 16
499	 11	229.0	23.9	 16
500	 11	150.3	29.9	 16
501	 11	108.8	28.7	 16
502	 11	80.8	14.7	 16
503	 11	75.3	13.9	 16
504	 11	873.5	187.5	 16
505	 11	111.5	19.9	 16
506	 11	70.3	17.1	 16
507	 11	70.8	9.5	 16
508	 11	66.0	10.4	 16
509	 11	67.3	13.0	 16
510	 11	173.5	21.5	 16
511	 11	152.5	26.6	 16
512	 11	72.0	12.5	 16
513	 11	128.5	17.6	 16
514	 11	120.5	19.7	 16
515	 11	67.5	14.9	 16
516	 11	95.0	12.3	 16
517	 11	299.0	62.8	 16
518	 11	79.5	19.2	 16
519	 11	561.3	82.8	 16
520	 11	1050.3	147.7	 16
521	 11	360.3	44.0	 16
522	 11	68.3	14.3	 16
523	 11	65.0	10.0	 16
524	 11	120.0	18.7	 16
525	 11	54.0	10.0	 16
526	 11	66.0	11.8	 16
527	 11	94.5	20.7	 16
528	 11	64.8	7.2	 16
529	 11	99.3	12.9	 16
530	 11	79.8	17.3	 16
531	 11	62.0	40.2	 16
532	 11	287.8	71.0	 16
533	 11	77.3	15.3	 16
534	 11	73.0	8.3	 16
535	 11	68.0	9.8	 16
536	 11	749.8	78.1	 16
537	 11	590.5	74.3	 16
538	 11	313.5	102.3	 16
539	 11	387.5	30.5	 16
540	 11	827.3	120.3	 16
541	 11	98.3	15.1	 16
542	 11	74.0	10.2	 16
543	 11	99.5	21.3	 16
544	 11	75.8	27.8	 16
545	 11	232.5	34.1	 16
546	 11	108.0	18.5	 16
547	 11	233.5	38.5	 16
548	 11	128.5	17.7	 16
549	 11	69.5	11.4	 16
550	 11	347.0	50.0	 16
551	 11	113.5	21.8	 16
552	 11	65.0	9.7	 16
553	 11	137.0	13.1	 16
554	 11	1186.0	239.0	 16
555	 11	237.8	40.4	 16
556	 11	526.5	113.7	 16
557	 11	96.8	14.9	 16
558	 11	2755.0	374.4	 16
559	 11	144.3	18.7	 16
560	 11	428.0	55.7	 16
561	 11	768.5	43.0	 16
562	 11	480.5	64.1	 16
563	 11	228.3	33.5	 16
564	 11	296.0	47.1	 16
565	 11	302.5	41.8	 16
566	 11	86.0	12.8	 16
567	 11	126.0	19.0	 16
568	 11	188.5	32.2	 16
569	 11	338.0	48.3	 16
570	 11	3836.5	754.5	 16
571	 11	375.5	60.6	 16
572	 11	65.3	13.1	 20
573	 11	62.5	14.8	 16
574	 11	119.8	14.8	 16
575	 11	91.8	20.2	 16
576	 11	98.0	20.5	 16
577	 11	170.3	26.5	 16
578	 11	109.3	13.7	 16
579	 11	704.8	103.9	 16
580	 11	99.8	17.1	 16
581	 11	701.5	81.6	 16
582	 11	99.0	13.7	 16
583	 11	143.8	24.7	 16
584	 11	62.8	13.9	 16
585	 11	162.3	44.8	 16
586	 11	110.3	19.9	 16
587	 11	250.5	37.2	 16
588	 11	63.0	17.4	 16
589	 11	941.0	84.1	 16
590	 11	110.5	19.1	 16
591	 11	134.5	19.1	 16
592	 11	219.8	33.3	 16
593	 11	81.3	11.6	 16
594	 11	423.5	61.3	 16
595	 11	161.8	20.0	 16
596	 11	614.0	91.4	 16
597	 11	330.5	30.2	 16
598	 11	127.3	13.4	 16
599	 11	133.8	20.4	 16
600	 11	64.3	14.6	 16
601	 11	117.0	19.4	 16
602	 11	162.3	31.6	 16
603	 11	154.8	13.7	 16
604	 11	164.3	26.5	 16
605	 11	74.3	11.7	 16
606	 11	108.5	17.0	 16
607	 11	76.0	15.4	 16
608	 11	67.8	9.5	 16
609	 11	106.0	17.5	 16
610	 11	66.8	11.4	 16
611	 11	511.5	57.8	 16
612	 11	379.8	43.5	 16
613	 11	221.0	15.2	 16
614	 11	368.3	53.2	 16
615	 11	114.5	19.2	 16
616	 11	95.5	17.2	 16
617	 11	75.5	9.9	 16
618	 11	86.5	13.1	 16
619	 11	360.3	54.4	 16
620	 11	75.0	11.0	 16
621	 11	60.5	10.7	 16
622	 11	63.0	8.6	 16
623	 11	59.3	15.8	 16
624	 11	139.0	24.7	 16
625	 11	74.8	12.9	 16
626	 11	95.3	18.5	 16
627	 11	647.0	138.0	 16
628	 11	99.5	16.1	 16
629	 11	59.3	14.3	 16
630	 11	85.0	13.5	 16
631	 11	324.3	32.6	 16
632	 11	366.8	47.5	 16
633	 11	131.0	17.0	 16
634	 11	261.0	30.7	 16
635	 11	81.3	17.5	 16
636	 11	62.3	8.1	 16
637	 11	223.8	25.6	 16
638	 11	171.3	26.1	 16
639	 11	59.3	9.7	 16
640	 11	120.3	22.1	 16
641	 11	115.5	17.7	 16
642	 11	88.3	18.2	 16
643	 11	378.8	78.5	 16
644	 11	167.5	30.0	 16
645	 11	86.5	15.8	 16
646	 11	85.3	21.7	 16
647	 11	99.3	17.7	 16
648	 11	104.5	17.3	 16
649	 11	262.0	33.9	 16
650	 11	66.3	13.7	 16
651	 11	213.3	46.8	 16
652	 11	106.5	19.5	 16
653	 11	60.3	8.0	 16
654	 11	57.3	12.9	 16
655	 11	149.0	16.8	 16
656	 11	77.3	13.1	 16
657	 11	68.3	13.3	 16
658	 11	391.0	62.9	 16
659	 11	87.3	17.3	 16
660	 11	165.3	32.6	 16
661	 11	72.0	10.6	 16
662	 11	107.8	22.4	 16
663	 11	1411.0	207.3	 16
664	 11	970.3	94.6	 16
665	 11	268.8	31.5	 16
666	 11	306.5	49.1	 16
667	 11	82.0	14.2	 16
668	 11	152.3	25.9	 16
669	 11	726.8	104.8	 16
670	 11	429.8	61.6	 16
671	 11	1463.0	217.1	 16
672	 11	328.0	44.2	 16
673	 11	95.0	12.7	 16
674	 11	81.8	10.1	 16
675	 11	172.5	34.9	 16
676	 11	72.3	17.8	 16
677	 11	420.5	40.7	 16
678	 11	603.8	80.2	 16
679	 11	149.3	22.4	 16
680	 11	198.8	29.9	 16
681	 11	128.0	24.4	 16
682	 11	1224.3	182.1	 16
683	 11	168.3	15.1	 16
684	 11	836.5	128.4	 16
685	 11	176.8	21.1	 16
686	 11	172.3	25.6	 16
687	 11	76.8	13.2	 16
688	 11	85.5	14.3	 16
689	 11	60.3	10.9	 16
690	 11	75.5	16.6	 20
691	 11	64.5	9.4	 16
692	 11	63.3	9.4	 16
693	 11	67.3	13.7	 16
694	 11	177.0	19.5	 16
695	 11	96.3	13.6	 16
696	 11	65.5	10.0	 16
697	 11	899.0	184.5	 16
698	 11	297.8	43.5	 16
699	 11	553.3	102.0	 16
700	 11	146.0	20.4	 16
701	 11	215.8	47.4	 16
702	 11	405.3	62.4	 16
703	 11	222.0	51.6	 16
704	 11	71.8	11.4	 16
705	 11	303.5	59.0	 16
706	 11	279.8	43.7	 16
707	 11	108.5	19.3	 16
708	 11	99.3	13.6	 16
709	 11	107.5	14.2	 16
710	 11	456.5	83.6	 16
711	 11	86.0	15.0	 16
  0	 12	4368.3	703.3	 16
  1	 12	89.8	11.5	 16
  2	 12	66.5	9.3	 16
  3	 12	69.3	9.3	 16
  4	 12	62.3	11.2	 16
  5	 12	96.3	20.0	 16
  6	 12	62.3	6.7	 16
  7	 12	158.5	28.3	 16
  8	 12	143.8	41.9	 16
  9	 12	71.8	16.6	 16
 10	 12	73.8	17.9	 16
 11	 12	51.3	7.4	 16
 12	 12	59.0	10.3	 16
 13	 12	54.0	9.7	 16
 14	 12	56.0	12.3	 16
 15	 12	53.3	8.9	 16
 16	 12	63.0	8.6	 16
 17	 12	49.0	7.0	 16
 18	 12	52.8	10.3	 16
 19	 12	58.0	12.7	 16
 20	 12	62.5	11.5	 16
 21	 12	60.3	14.8	 16
 22	 12	56.5	12.8	 16
 23	 12	50.0	10.7	 16
 24	 12	58.3	10.1	 16
 25	 12	51.3	11.0	 16
 26	 12	51.0	8.9	 16
 27	 12	53.8	13.8	 16
 28	 12	65.0	15.4	 16
 29	 12	48.0	9.4	 16
 30	 12	54.3	8.9	 16
 31	 12	60.8	19.1	 16
 32	 12	59.0	19.6	 16
 33	 12	64.5	26.2	 16
 34	 12	56.5	11.2	 16
 35	 12	52.8	11.5	 16
 36	 12	50.5	6.7	 16
 37	 12	60.0	13.1	 16
 38	 12	54.5	10.4	 16
 39	 12	53.3	11.0	 16
 40	 12	55.0	11.5	 16
 41	 12	50.3	10.0	 16
 42	 12	61.3	12.3	 16
 43	 12	58.0	9.0	 16
 44	 12	51.3	9.7	 16
 45	 12	53.0	10.5	 16
 46	 12	61.0	12.5	 16
 47	 12	59.3	10.3	 16
 48	 12	53.8	7.3	 16
 49	 12	53.3	10.0	 16
 50	 12	73.5	17.7	 16
 51	 12	47.5	8.1	 16
 52	 12	52.8	10.1	 16
 53	 12	49.8	12.1	 16
 54	 12	55.8	20.1	 16
 55	 12	57.0	14.4	 16
 56	 12	57.3	7.9	 16
 57	 12	49.5	8.3	 16
 58	 12	55.3	15.2	 16
 59	 12	52.5	10.6	 16
 60	 12	52.3	8.4	 16
 61	 12	50.3	10.2	 16
 62	 12	54.3	8.9	 16
 63	 12	52.0	9.3	 16
 64	 12	66.5	13.7	 16
 65	 12	50.0	8.7	 16
 66	 12	71.3	22.6	 16
 67	 12	51.5	7.5	 16
 68	 12	49.3	8.0	 16
 69	 12	62.3	14.5	 16
 70	 12	69.3	39.9	 16
 71	 12	73.0	16.2	 16
 72	 12	81.3	21.0	 16
 73	 12	99.5	17.9	 16
 74	 12	73.0	14.6	 16
 75	 12	63.3	11.1	 16
 76	 12	52.3	11.8	 16
 77	 12	51.0	9.3	 16
 78	 12	49.8	9.2	 16
 79	 12	60.3	11.0	 16
 80	 12	64.3	11.9	 16
 81	 12	98.5	32.0	 16
 82	 12	76.3	20.1	 16
 83	 12	53.8	9.6	 16
 84	 12	54.0	10.7	 16
 85	 12	59.0	23.4	 16
 86	 12	53.8	15.2	 16
 87	 12	55.3	11.7	 16
 88	 12	57.3	10.0	 16
 89	 12	53.5	13.2	 16
 90	 12	52.3	8.4	 16
 91	 12	60.8	14.9	 16
 92	 12	46.5	7.3	 16
 93	 12	58.0	9.1	 16
 94	 12	53.3	9.5	 16
 95	 12	58.8	10.7	 16
 96	 12	55.8	11.7	 16
 97	 12	55.3	11.1	 16
 98	 12	64.3	25.0	 16
 99	 12	70.3	13.7	 16
100	 12	61.5	18.0	 20
101	 12	43.3	7.2	 16
102	 12	78.3	22.2	 16
103	 12	48.8	11.3	 16
104	 12	64.0	11.1	 16
105	 12	54.3	8.9	 16
106	 12	50.8	7.5	 16
107	 12	59.5	11.4	 16
108	 12	50.8	8.8	 16
109	 12	55.0	12.3	 16
110	 12	50.5	10.0	 16
111	 12	75.0	12.0	 16
112	 12	117.0	21.1	 16
113	 12	308.3	50.5	 16
114	 12	129.8	22.5	 16
115	 12	124.3	21.1	 16
116	 12	147.8	22.2	 16
117	 12	68.3	16.5	 16
118	 12	57.3	10.0	 16
119	 12	91.5	8.8	 16
120	 12	112.5	19.5	 16
121	 12	101.0	16.5	 16
122	 12	96.0	24.3	 16
123	 12	253.3	65.2	 16
124	 12	225.5	26.5	 16
125	 12	64.3	11.2	 16
126	 12	79.5	12.8	 16
127	 12	127.0	26.1	 16
128	 12	70.5	12.9	 16
129	 12	103.3	21.3	 16
130	 12	297.3	123.0	 16
131	 12	72.3	12.7	 16
132	 12	99.5	17.6	 16
133	 12	75.3	9.8	 16
134	 12	74.8	12.3	 16
135	 12	123.0	21.0	 16
136	 12	59.0	10.1	 16
137	 12	72.3	9.7	 16
138	 12	68.0	10.0	 16
139	 12	56.0	10.3	 16
140	 12	61.0	11.7	 16
141	 12	99.0	16.8	 16
142	 12	255.5	34.8	 16
143	 12	224.8	45.6	 16
144	 12	70.5	12.4	 16
145	 12	72.3	10.5	 16
146	 12	81.3	20.5	 16
147	 12	74.3	15.7	 16
148	 12	59.0	9.1	 16
149	 12	93.0	13.9	 16
150	 12	88.5	14.9	 16
151	 12	161.8	23.2	 16
152	 12	119.0	15.0	 16
153	 12	367.5	140.9	 16
154	 12	777.3	110.1	 16
155	 12	77.3	13.8	 16
156	 12	64.0	8.6	 16
157	 12	147.0	20.9	 16
158	 12	508.8	59.9	 16
159	 12	116.3	17.7	 16
160	 12	63.5	9.2	 16
161	 12	163.0	18.5	 16
162	 12	73.0	19.7	 16
163	 12	64.0	10.5	 16
164	 12	65.8	7.9	 16
165	 12	66.3	10.9	 16
166	 12	177.3	24.9	 16
167	 12	65.3	14.6	 16
168	 12	65.0	13.6	 16
169	 12	57.5	10.8	 16
170	 12	155.8	17.4	 16
171	 12	65.0	11.4	 16
172	 12	97.3	12.6	 16
173	 12	85.8	17.4	 16
174	 12	92.3	35.2	 16
175	 12	123.8	22.3	 16
176	 12	135.5	41.7	 16
177	 12	110.5	17.5	 16
178	 12	98.3	15.3	 16
179	 12	88.3	14.2	 16
180	 12	91.0	21.1	 16
181	 12	157.0	27.9	 16
182	 12	141.3	22.8	 16
183	 12	67.5	12.2	 16
184	 12	86.3	18.7	 16
185	 12	80.8	14.7	 16
186	 12	71.0	17.4	 16
187	 12	277.0	28.6	 16
188	 12	95.3	16.7	 16
189	 12	152.8	25.2	 16
190	 12	99.0	21.8	 16
191	 12	78.3	15.6	 16
192	 12	103.0	15.0	 16
193	 12	75.5	14.9	 16
194	 12	177.8	31.1	 16
195	 12	67.0	12.8	 16
196	 12	146.0	23.2	 16
197	 12	65.8	9.3	 16
198	 12	101.0	13.0	 16
199	 12	295.8	31.0	 16
200	 12	70.8	14.4	 16
201	 12	81.8	13.2	 16
202	 12	160.5	32.3	 16
203	 12	61.5	13.0	 16
204	 12	60.3	12.1	 16
205	 12	61.5	9.3	 16
206	 12	69.8	13.3	 16
207	 12	57.0	10.3	 16
208	 12	75.5	8.5	 16
209	 12	113.3	14.8	 16
210	 12	100.8	31.9	 16
211	 12	66.5	9.5	 16
212	 12	149.0	22.5	 16
213	 12	143.8	25.8	 16
214	 12	205.3	27.4	 16
215	 12	422.5	24.9	 16
216	 12	365.0	32.7	 16
217	 12	105.5	13.7	 16
218	 12	85.0	17.3	 16
219	 12	114.3	15.1	 20
220	 12	69.3	12.2	 16
221	 12	155.0	22.4	 16
222	 12	450.3	132.2	 16
223	 12	128.5	55.1	 16
224	 12	68.8	13.9	 16
225	 12	175.3	62.7	 16
226	 12	105.5	20.0	 16
227	 12	101.0	46.9	 16
228	 12	78.5	13.9	 16
229	 12	171.8	20.2	 16
230	 12	235.5	26.5	 16
231	 12	167.8	15.2	 16
232	 12	111.3	20.4	 16
233	 12	78.3	17.2	 16
234	 12	80.0	16.0	 16
235	 12	129.0	15.7	 16
236	 12	161.0	20.6	 16
237	 12	100.5	20.3	 16
238	 12	123.0	15.6	 16
239	 12	108.3	12.4	 16
240	 12	201.3	39.6	 16
241	 12	114.0	38.1	 16
242	 12	116.5	30.8	 16
243	 12	79.3	15.0	 16
244	 12	86.5	20.0	 16
245	 12	90.5	17.9	 16
246	 12	69.0	6.8	 16
247	 12	76.8	16.8	 16
248	 12	100.0	17.4	 16
249	 12	69.8	11.5	 16
250	 12	101.3	18.0	 16
251	 12	90.3	13.3	 16
252	 12	83.5	13.8	 16
253	 12	101.3	21.4	 16
254	 12	82.8	15.5	 16
255	 12	69.5	12.7	 16
256	 12	63.3	9.7	 16
257	 12	69.5	10.5	 16
258	 12	135.5	27.2	 16
259	 12	141.8	16.7	 16
260	 12	83.0	17.5	 16
261	 12	79.3	22.5	 16
262	 12	90.5	16.1	 16
263	 12	128.0	17.7	 16
264	 12	78.8	14.7	 16
265	 12	74.3	11.3	 16
266	 12	329.8	38.2	 16
267	 12	116.5	20.8	 16
268	 12	121.3	18.1	 16
269	 12	109.5	16.6	 16
270	 12	138.5	45.7	 16
271	 12	136.0	19.5	 16
272	 12	73.5	13.1	 16
273	 12	70.0	12.7	 16
274	 12	157.0	21.9	 16
275	 12	223.3	33.9	 16
276	 12	82.3	15.9	 16
277	 12	73.3	13.3	 16
278	 12	130.3	29.0	 16
279	 12	169.0	25.8	 16
280	 12	84.3	10.3	 16
281	 12	89.8	19.1	 16
282	 12	187.3	32.4	 16
283	 12	107.3	16.2	 16
284	 12	72.8	19.1	 16
285	 12	67.3	9.5	 16
286	 12	144.0	27.1	 16
287	 12	91.0	14.7	 16
288	 12	320.0	50.4	 16
289	 12	142.8	20.4	 16
290	 12	78.3	16.6	 16
291	 12	62.0	13.9	 16
292	 12	105.5	17.2	 16
293	 12	121.3	21.3	 16
294	 12	74.8	13.7	 16
295	 12	154.0	24.4	 16
296	 12	182.3	16.7	 16
297	 12	161.0	40.4	 16
298	 12	72.5	11.6	 16
299	 12	172.3	23.8	 16
300	 12	122.5	23.3	 16
301	 12	107.0	15.8	 16
302	 12	116.0	26.2	 16
303	 12	152.3	71.3	 16
304	 12	218.8	33.9	 16
305	 12	667.3	63.8	 16
306	 12	144.3	21.9	 16
307	 12	88.8	8.5	 16
308	 12	205.0	31.1	 16
309	 12	283.3	28.3	 16
310	 12	66.8	15.0	 16
311	 12	78.0	15.7	 16
312	 12	80.0	15.7	 16
313	 12	263.3	25.9	 16
314	 12	77.3	19.8	 16
315	 12	73.0	10.7	 16
316	 12	56.3	10.8	 16
317	 12	70.5	11.2	 16
318	 12	68.8	9.8	 16
319	 12	76.0	17.2	 16
320	 12	75.3	13.7	 16
321	 12	72.8	13.0	 16
322	 12	69.0	10.9	 16
323	 12	202.5	19.0	 16
324	 12	213.0	25.7	 16
325	 12	79.0	14.7	 16
326	 12	102.5	16.6	 16
327	 12	66.8	13.4	 16
328	 12	69.8	14.6	 16
329	 12	90.0	14.3	 16
330	 12	143.0	20.0	 16
331	 12	87.0	17.1	 16
332	 12	59.3	10.4	 16
333	 12	90.0	15.8	 16
334	 12	62.5	11.4	 16
335	 12	108.5	16.4	 16
336	 12	59.0	13.5	 16
337	 12	76.3	13.5	 16
338	 12	76.3	53.9	 20
339	 12	66.3	10.7	 16
340	 12	87.3	17.4	 16
341	 12	164.8	16.7	 16
342	 12	118.5	16.0	 16
343	 12	67.5	14.4	 16
344	 12	84.3	7.7	 16
345	 12	82.0	15.7	 16
346	 12	56.3	7.5	 16
347	 12	64.0	10.4	 16
348	 12	73.8	13.6	 16
349	 12	60.5	10.2	 16
350	 12	435.8	75.6	 16
351	 12	129.5	131.1	 16
352	 12	82.5	13.1	 16
353	 12	158.8	21.2	 16
354	 12	138.5	21.5	 16
355	 12	230.5	22.4	 16
356	 12	220.3	37.3	 16
357	 12	87.0	17.2	 16
358	 12	78.8	23.8	 16
359	 12	66.5	13.0	 16
360	 12	121.0	18.9	 16
361	 12	370.3	30.8	 16
362	 12	64.3	14.0	 16
363	 12	63.3	9.5	 16
364	 12	66.8	15.0	 16
365	 12	52.5	7.6	 16
366	 12	68.0	12.3	 16
367	 12	75.3	12.3	 16
368	 12	80.3	14.0	 16
369	 12	89.3	41.6	 16
370	 12	95.5	11.1	 16
371	 12	247.0	37.3	 16
372	 12	176.0	17.2	 16
373	 12	65.3	10.2	 16
374	 12	74.5	12.6	 16
375	 12	162.8	20.4	 16
376	 12	68.3	10.3	 16
377	 12	74.8	16.6	 16
378	 12	87.3	12.4	 16
379	 12	79.3	27.5	 16
380	 12	55.8	7.4	 16
381	 12	96.5	13.1	 16
382	 12	105.5	10.9	 16
383	 12	91.8	101.4	 16
384	 12	88.0	12.6	 16
385	 12	54.3	8.4	 16
386	 12	97.5	47.8	 16
387	 12	63.3	12.2	 16
388	 12	53.8	7.9	 16
389	 12	67.0	23.5	 16
390	 12	103.3	73.2	 16
391	 12	65.0	10.5	 16
392	 12	62.8	9.0	 16
393	 12	74.8	11.0	 16
394	 12	86.5	9.8	 16
395	 12	72.3	13.7	 16
396	 12	155.8	29.9	 16
397	 12	359.3	25.6	 16
398	 12	206.8	24.1	 16
399	 12	111.5	14.8	 16
400	 12	100.3	12.5	 16
401	 12	101.3	11.2	 16
402	 12	82.5	14.7	 16
403	 12	69.5	14.8	 16
404	 12	76.8	37.9	 16
405	 12	69.3	10.4	 16
406	 12	74.8	10.2	 16
407	 12	78.0	22.1	 16
408	 12	87.0	20.1	 16
409	 12	130.3	26.1	 16
410	 12	217.0	31.7	 16
411	 12	82.5	13.9	 16
412	 12	83.5	15.5	 16
413	 12	73.3	11.9	 16
414	 12	76.5	21.2	 16
415	 12	164.5	26.7	 16
416	 12	117.3	24.2	 16
417	 12	113.0	22.3	 16
418	 12	166.5	20.2	 16
419	 12	83.3	13.9	 16
420	 12	67.0	16.9	 16
421	 12	146.0	26.7	 16
422	 12	63.0	11.5	 16
423	 12	120.0	27.6	 16
424	 12	325.5	43.1	 16
425	 12	269.0	31.9	 16
426	 12	150.8	22.6	 16
427	 12	80.8	15.9	 16
428	 12	69.3	10.1	 16
429	 12	82.3	13.3	 16
430	 12	133.3	23.1	 16
431	 12	65.0	11.4	 16
432	 12	77.5	11.5	 16
433	 12	72.5	12.3	 16
434	 12	61.3	16.7	 16
435	 12	65.3	10.6	 16
436	 12	80.8	16.6	 16
437	 12	100.3	14.3	 16
438	 12	845.5	162.7	 16
439	 12	90.0	14.3	 16
440	 12	87.3	11.9	 16
441	 12	284.0	28.8	 16
442	 12	78.3	15.3	 16
443	 12	115.8	14.0	 16
444	 12	71.5	12.3	 16
445	 12	221.5	40.4	 16
446	 12	64.8	10.6	 16
447	 12	100.5	16.3	 16
448	 12	61.5	14.0	 16
449	 12	75.5	10.7	 16
450	 12	92.3	19.7	 16
451	 12	100.8	11.0	 16
452	 12	64.3	9.8	 16
453	 12	68.3	11.6	 16
454	 12	107.0	13.6	 16
455	 12	77.0	64.0	 16
456	 12	67.5	11.0	 20
457	 12	148.3	21.4	 16
458	 12	133.8	19.6	 16
459	 12	91.3	20.5	 16
460	 12	59.5	10.0	 16
461	 12	95.8	16.0	 16
462	 12	184.3	31.6	 16
463	 12	393.5	39.2	 16
464	 12	110.0	21.5	 16
465	 12	61.3	8.0	 16
466	 12	77.3	20.1	 16
467	 12	60.8	10.3	 16
468	 12	73.8	15.6	 16
469	 12	243.3	24.5	 16
470	 12	153.5	23.1	 16
471	 12	206.3	30.8	 16
472	 12	181.3	28.0	 16
473	 12	96.5	21.4	 16
474	 12	54.8	10.5	 16
475	 12	74.5	13.6	 16
476	 12	80.5	13.2	 16
477	 12	68.3	14.8	 16
478	 12	83.3	12.9	 16
479	 12	87.5	41.7	 16
480	 12	87.3	11.6	 16
481	 12	158.0	28.2	 16
482	 12	82.8	16.5	 16
483	 12	65.5	11.1	 16
484	 12	62.0	9.8	 16
485	 12	70.3	10.0	 16
486	 12	152.5	22.9	 16
487	 12	70.3	13.9	 16
488	 12	78.0	10.9	 16
489	 12	59.3	12.3	 16
490	 12	73.3	10.9	 16
491	 12	70.5	12.4	 16
492	 12	88.0	13.2	 16
493	 12	76.3	15.7	 16
494	 12	483.5	36.6	 16
495	 12	101.8	22.5	 16
496	 12	2830.3	154.9	 16
497	 12	2954.8	171.3	 16
498	 12	2699.5	281.0	 16
499	 12	201.0	28.1	 16
500	 12	90.8	50.7	 16
501	 12	75.8	10.3	 16
502	 12	70.0	15.7	 16
503	 12	67.5	10.8	 16
504	 12	155.5	22.3	 16
505	 12	65.0	9.7	 16
506	 12	61.8	16.1	 16
507	 12	59.8	11.2	 16
508	 12	67.3	13.7	 16
509	 12	62.5	12.9	 16
510	 12	137.3	24.1	 16
511	 12	197.3	28.2	 16
512	 12	74.0	12.4	 16
513	 12	122.5	25.4	 16
514	 12	115.3	16.0	 16
515	 12	78.8	15.5	 16
516	 12	89.8	19.9	 16
517	 12	90.5	14.8	 16
518	 12	79.0	13.4	 16
519	 12	90.5	17.9	 16
520	 12	100.3	21.3	 16
521	 12	139.5	21.6	 16
522	 12	61.5	23.1	 16
523	 12	63.0	8.6	 16
524	 12	235.5	28.7	 16
525	 12	62.5	15.3	 16
526	 12	61.3	9.5	 16
527	 12	51.5	7.0	 16
528	 12	57.8	11.3	 16
529	 12	173.0	26.0	 16
530	 12	66.3	12.6	 16
531	 12	71.8	12.8	 16
532	 12	71.0	10.4	 16
533	 12	91.3	16.4	 16
534	 12	74.3	18.0	 16
535	 12	63.3	12.9	 16
536	 12	199.3	30.5	 16
537	 12	176.0	30.2	 16
538	 12	129.5	18.3	 16
539	 12	255.8	26.7	 16
540	 12	186.3	31.5	 16
541	 12	146.5	34.2	 16
542	 12	142.3	18.1	 16
543	 12	106.0	23.0	 16
544	 12	57.0	11.1	 16
545	 12	79.0	12.0	 16
546	 12	89.5	17.4	 16
547	 12	127.3	17.8	 16
548	 12	112.3	19.7	 16
549	 12	77.0	13.8	 16
550	 12	101.0	15.6	 16
551	 12	65.8	12.4	 16
552	 12	61.3	10.7	 16
553	 12	88.0	11.0	 16
554	 12	212.5	31.0	 16
555	 12	103.3	18.0	 16
556	 12	125.8	15.0	 16
557	 12	115.5	21.4	 16
558	 12	317.3	48.7	 16
559	 12	106.5	13.5	 16
560	 12	628.8	73.7	 16
561	 12	577.5	83.8	 16
562	 12	159.8	22.4	 16
563	 12	140.8	26.0	 16
564	 12	143.8	18.6	 16
565	 12	137.0	19.6	 16
566	 12	89.8	13.0	 16
567	 12	185.8	47.2	 16
568	 12	77.3	11.1	 16
569	 12	84.3	19.9	 16
570	 12	526.3	95.3	 16
571	 12	173.0	16.0	 16
572	 12	65.0	13.1	 16
573	 12	63.8	11.4	 16
574	 12	73.0	13.6	 16
575	 12	63.8	10.9	 20
576	 12	74.3	15.3	 16
577	 12	110.0	18.1	 16
578	 12	146.3	28.0	 16
579	 12	235.3	26.0	 16
580	 12	86.3	14.3	 16
581	 12	290.5	73.9	 16
582	 12	66.0	12.2	 16
583	 12	193.8	22.0	 16
584	 12	84.8	15.4	 16
585	 12	249.8	42.3	 16
586	 12	247.3	31.0	 16
587	 12	87.0	12.7	 16
588	 12	89.3	18.7	 16
589	 12	149.0	24.6	 16
590	 12	104.3	18.8	 16
591	 12	79.5	21.4	 16
592	 12	124.3	18.3	 16
593	 12	68.5	17.3	 16
594	 12	249.8	33.3	 16
595	 12	120.5	13.2	 16
596	 12	163.0	17.8	 16
597	 12	146.0	16.3	 16
598	 12	165.0	28.5	 16
599	 12	106.3	17.4	 16
600	 12	404.3	30.7	 16
601	 12	122.0	19.4	 16
602	 12	125.0	15.5	 16
603	 12	103.3	18.2	 16
604	 12	94.3	17.4	 16
605	 12	51.3	10.9	 16
606	 12	67.0	15.6	 16
607	 12	62.5	7.9	 16
608	 12	68.3	10.6	 16
609	 12	66.3	9.8	 16
610	 12	59.0	13.8	 16
611	 12	82.5	14.6	 16
612	 12	110.0	16.3	 16
613	 12	314.0	39.1	 16
614	 12	142.3	20.3	 16
615	 12	83.3	16.4	 16
616	 12	69.3	11.7	 16
617	 12	82.3	13.0	 16
618	 12	72.0	13.1	 16
619	 12	328.5	33.2	 16
620	 12	74.0	9.1	 16
621	 12	58.5	8.4	 16
622	 12	50.0	12.5	 16
623	 12	61.0	15.3	 16
624	 12	69.5	10.7	 16
625	 12	70.0	15.0	 16
626	 12	87.8	14.8	 16
627	 12	154.8	44.1	 16
628	 12	84.5	16.6	 16
629	 12	60.8	10.7	 16
630	 12	73.5	12.7	 16
631	 12	90.5	11.9	 16
632	 12	136.0	21.6	 16
633	 12	95.0	12.9	 16
634	 12	217.0	25.4	 16
635	 12	66.0	9.1	 16
636	 12	54.8	9.5	 16
637	 12	69.0	11.7	 16
638	 12	76.3	14.3	 16
639	 12	68.5	14.1	 16
640	 12	209.8	29.6	 16
641	 12	92.5	13.8	 16
642	 12	67.3	13.9	 16
643	 12	103.5	22.6	 16
644	 12	134.3	35.7	 16
645	 12	82.8	17.2	 16
646	 12	77.3	11.4	 16
647	 12	102.3	12.0	 16
648	 12	90.8	15.8	 16
649	 12	198.3	36.2	 16
650	 12	87.8	19.0	 16
651	 12	64.5	10.1	 16
652	 12	66.0	13.4	 16
653	 12	51.0	9.5	 16
654	 12	67.0	9.8	 16
655	 12	85.3	14.7	 16
656	 12	70.5	11.7	 16
657	 12	64.0	13.3	 16
658	 12	108.8	22.9	 16
659	 12	76.3	17.2	 16
660	 12	75.5	9.5	 16
661	 12	77.3	10.5	 16
662	 12	103.3	15.2	 16
663	 12	236.3	25.9	 16
664	 12	209.0	27.7	 16
665	 12	90.8	18.5	 16
666	 12	153.5	22.7	 16
667	 12	73.0	13.5	 16
668	 12	97.5	14.0	 16
669	 12	244.3	33.9	 16
670	 12	221.3	27.0	 16
671	 12	374.0	41.1	 16
672	 12	385.5	30.6	 16
673	 12	65.3	12.8	 16
674	 12	88.8	9.9	 16
675	 12	85.5	36.8	 16
676	 12	62.5	13.6	 16
677	 12	90.5	8.9	 16
678	 12	153.5	14.5	 16
679	 12	202.5	37.9	 16
680	 12	309.8	27.5	 16
681	 12	175.3	22.9	 16
682	 12	217.8	48.5	 16
683	 12	170.5	27.7	 16
684	 12	138.5	14.1	 16
685	 12	170.0	20.3	 16
686	 12	118.3	23.6	 16
687	 12	80.5	13.7	 16
688	 12	71.8	10.6	 16
689	 12	65.0	26.4	 16
690	 12	75.0	14.9	 16
691	 12	56.0	8.3	 16
692	 12	63.5	12.0	 16
693	 12	78.5	16.0	 16
694	 12	97.0	22.4	 20
695	 12	84.8	15.4	 16
696	 12	68.0	9.6	 16
697	 12	132.3	20.4	 16
698	 12	72.3	14.7	 16
699	 12	110.0	16.9	 16
700	 12	189.0	18.4	 16
701	 12	88.5	16.4	 16
702	 12	87.8	18.1	 16
703	 12	62.3	15.4	 16
704	 12	65.3	10.9	 16
705	 12	106.3	17.2	 16
706	 12	108.0	14.6	 16
707	 12	108.8	14.4	 16
708	 12	139.8	22.8	 16
709	 12	91.3	12.7	 16
710	 12	113.3	21.4	 16
711	 12	7819.8	928.5	 16
  0	 13	100.5	16.5	 16
  1	 13	147.5	21.7	 16
  2	 13	77.0	10.1	 16
  3	 13	97.5	16.9	 16
  4	 13	134.0	13.4	 16
  5	 13	101.0	17.3	 16
  6	 13	75.0	14.8	 16
  7	 13	151.8	55.9	 16
  8	 13	129.0	17.0	 16
  9	 13	163.0	32.5	 16
 10	 13	144.0	34.6	 16
 11	 13	56.3	10.9	 16
 12	 13	71.8	14.9	 16
 13	 13	78.3	21.4	 16
 14	 13	65.8	10.4	 16
 15	 13	187.3	26.2	 16
 16	 13	280.5	26.8	 16
 17	 13	449.0	85.0	 16
 18	 13	116.8	18.4	 16
 19	 13	101.3	18.3	 16
 20	 13	159.3	28.3	 16
 21	 13	237.3	37.5	 16
 22	 13	66.5	12.4	 16
 23	 13	73.0	11.5	 16
 24	 13	69.0	13.2	 16
 25	 13	134.3	20.8	 16
 26	 13	93.5	17.3	 16
 27	 13	873.5	197.9	 16
 28	 13	180.3	29.8	 16
 29	 13	73.3	11.8	 16
 30	 13	62.3	14.8	 16
 31	 13	1060.8	243.5	 16
 32	 13	83.5	21.4	 16
 33	 13	281.5	68.8	 16
 34	 13	754.5	180.1	 16
 35	 13	586.5	160.2	 16
 36	 13	89.0	12.0	 16
 37	 13	537.5	74.7	 16
 38	 13	90.0	14.8	 16
 39	 13	174.3	23.1	 16
 40	 13	127.8	16.0	 16
 41	 13	152.5	28.7	 16
 42	 13	119.5	19.4	 16
 43	 13	78.8	17.5	 16
 44	 13	64.8	10.1	 16
 45	 13	190.8	27.7	 16
 46	 13	825.0	110.6	 16
 47	 13	3561.8	529.3	 16
 48	 13	176.0	61.1	 16
 49	 13	104.0	59.6	 16
 50	 13	103.8	18.4	 16
 51	 13	1921.8	373.8	 16
 52	 13	111.3	22.5	 16
 53	 13	65.8	12.1	 16
 54	 13	73.3	9.6	 16
 55	 13	76.3	14.4	 16
 56	 13	73.5	13.5	 16
 57	 13	85.5	19.0	 16
 58	 13	98.8	18.1	 16
 59	 13	92.0	9.1	 16
 60	 13	132.3	52.0	 16
 61	 13	91.8	11.8	 16
 62	 13	127.8	19.8	 16
 63	 13	138.3	23.9	 16
 64	 13	2438.0	233.7	 16
 65	 13	502.8	71.6	 16
 66	 13	114.0	13.8	 16
 67	 13	163.0	23.1	 16
 68	 13	293.5	45.0	 16
 69	 13	90.0	9.2	 16
 70	 13	63.5	8.4	 16
 71	 13	315.3	47.5	 16
 72	 13	68.8	16.1	 16
 73	 13	69.8	11.2	 16
 74	 13	277.3	54.0	 16
 75	 13	77.8	20.7	 16
 76	 13	85.3	22.6	 16
 77	 13	2645.5	521.1	 16
 78	 13	245.5	45.4	 16
 79	 13	72.0	13.7	 16
 80	 13	295.0	59.8	 16
 81	 13	79.5	15.8	 16
 82	 13	299.8	74.4	 16
 83	 13	124.0	12.5	 16
 84	 13	62.8	10.4	 16
 85	 13	65.0	11.0	 16
 86	 13	168.5	29.7	 16
 87	 13	97.3	19.7	 16
 88	 13	423.0	36.8	 16
 89	 13	761.8	62.2	 16
 90	 13	135.8	13.8	 16
 91	 13	606.5	56.6	 16
 92	 13	109.3	23.2	 16
 93	 13	85.3	14.6	 16
 94	 13	128.0	23.1	 16
 95	 13	109.5	101.2	 16
 96	 13	107.0	17.2	 16
 97	 13	65.5	12.8	 16
 98	 13	76.5	15.0	 16
 99	 13	92.3	15.7	 16
100	 13	94.3	13.0	 16
101	 13	857.8	170.4	 16
102	 13	74.0	8.3	 16
103	 13	107.0	21.9	 16
104	 13	60.0	9.5	 20
105	 13	81.8	17.9	 16
106	 13	401.0	106.7	 16
107	 13	55.3	10.5	 16
108	 13	103.3	21.5	 16
109	 13	69.8	12.0	 16
110	 13	110.0	20.6	 16
111	 13	131.8	21.2	 16
112	 13	411.3	71.7	 16
113	 13	91.3	20.7	 16
114	 13	68.3	11.3	 16
115	 13	164.3	33.0	 16
116	 13	101.5	18.8	 16
117	 13	188.3	35.6	 16
118	 13	84.0	17.6	 16
119	 13	107.3	21.0	 16
120	 13	1826.8	348.6	 16
121	 13	137.0	23.8	 16
122	 13	67.3	10.1	 16
123	 13	143.0	27.5	 16
124	 13	259.5	28.7	 16
125	 13	97.8	18.3	 16
126	 13	1160.5	274.2	 16
127	 13	116.0	17.6	 16
128	 13	109.8	23.4	 16
129	 13	373.5	79.5	 16
130	 13	93.5	18.5	 16
131	 13	291.0	60.8	 16
132	 13	297.5	69.1	 16
133	 13	434.0	88.4	 16
134	 13	2491.8	433.6	 16
135	 13	100.3	20.6	 16
136	 13	63.5	10.9	 16
137	 13	187.0	28.9	 16
138	 13	272.5	47.1	 16
139	 13	110.0	21.0	 16
140	 13	121.0	23.2	 16
141	 13	61.0	17.7	 16
142	 13	420.5	78.9	 16
143	 13	101.3	13.3	 16
144	 13	189.8	24.7	 16
145	 13	506.8	71.8	 16
146	 13	1557.3	271.6	 16
147	 13	71.3	11.3	 16
148	 13	538.8	79.9	 16
149	 13	113.8	134.2	 16
150	 13	103.0	11.0	 16
151	 13	67.5	13.8	 16
152	 13	103.3	18.9	 16
153	 13	5752.5	1414.8	 16
154	 13	330.3	53.9	 16
155	 13	83.3	17.5	 16
156	 13	118.5	15.4	 16
157	 13	127.3	31.5	 16
158	 13	129.0	17.1	 16
159	 13	225.5	30.3	 16
160	 13	64.3	12.0	 16
161	 13	149.3	27.1	 16
162	 13	69.5	13.0	 16
163	 13	61.0	11.9	 16
164	 13	130.8	18.5	 16
165	 13	393.3	58.7	 16
166	 13	78.3	14.9	 16
167	 13	157.0	55.9	 16
168	 13	96.5	15.0	 16
169	 13	71.3	14.2	 16
170	 13	86.0	43.4	 16
171	 13	59.8	15.0	 16
172	 13	147.5	33.7	 16
173	 13	57.5	8.1	 16
174	 13	139.0	28.8	 16
175	 13	97.3	13.2	 16
176	 13	95.5	14.1	 16
177	 13	62.3	12.4	 16
178	 13	229.8	34.5	 16
179	 13	73.3	9.2	 16
180	 13	285.3	41.9	 16
181	 13	154.0	20.0	 16
182	 13	200.8	34.2	 16
183	 13	102.0	19.6	 16
184	 13	140.0	26.5	 16
185	 13	72.0	18.7	 16
186	 13	1731.8	301.2	 16
187	 13	475.8	77.3	 16
188	 13	168.8	22.8	 16
189	 13	87.8	17.0	 16
190	 13	246.3	39.4	 16
191	 13	136.5	17.7	 16
192	 13	258.0	45.4	 16
193	 13	135.8	20.0	 16
194	 13	77.0	13.6	 16
195	 13	210.5	30.0	 16
196	 13	124.3	28.0	 16
197	 13	85.0	13.1	 16
198	 13	295.3	55.3	 16
199	 13	106.5	19.0	 16
200	 13	384.5	97.2	 16
201	 13	67.5	9.9	 16
202	 13	248.0	29.5	 16
203	 13	136.0	20.2	 16
204	 13	63.8	14.3	 16
205	 13	72.0	12.2	 16
206	 13	96.0	20.6	 16
207	 13	85.5	16.9	 16
208	 13	107.3	20.3	 16
209	 13	84.3	18.4	 16
210	 13	99.0	7.9	 16
211	 13	160.0	21.1	 16
212	 13	2397.8	355.1	 16
213	 13	203.5	34.4	 16
214	 13	69.3	12.0	 16
215	 13	108.3	14.6	 16
216	 13	73.5	11.4	 16
217	 13	68.0	10.8	 16
218	 13	67.5	11.9	 16
219	 13	65.0	12.9	 16
220	 13	160.0	30.9	 16
221	 13	148.3	29.4	 16
222	 13	144.0	21.8	 20
223	 13	252.5	25.0	 16
224	 13	88.0	24.2	 16
225	 13	75.0	11.6	 16
226	 13	87.5	10.6	 16
227	 13	122.0	22.7	 16
228	 13	159.3	18.9	 16
229	 13	72.0	14.1	 16
230	 13	84.5	16.2	 16
231	 13	263.0	24.8	 16
232	 13	256.3	42.9	 16
233	 13	197.5	25.9	 16
234	 13	85.3	14.7	 16
235	 13	1119.8	227.2	 16
236	 13	261.5	49.8	 16
237	 13	1839.0	177.1	 16
238	 13	1808.5	252.4	 16
239	 13	604.0	106.0	 16
240	 13	302.5	74.7	 16
241	 13	3895.8	884.1	 16
242	 13	3060.3	879.6	 16
243	 13	279.3	79.8	 16
244	 13	279.3	69.3	 16
245	 13	69.0	13.6	 16
246	 13	160.0	28.4	 16
247	 13	107.5	27.9	 16
248	 13	133.3	32.8	 16
249	 13	85.0	13.7	 16
250	 13	71.3	11.3	 16
251	 13	85.5	17.0	 16
252	 13	70.3	28.0	 16
253	 13	71.8	9.8	 16
254	 13	86.5	18.9	 16
255	 13	90.3	14.5	 16
256	 13	765.5	154.4	 16
257	 13	79.8	11.0	 16
258	 13	101.0	17.0	 16
259	 13	88.8	17.5	 16
260	 13	59.5	10.6	 16
261	 13	179.0	40.5	 16
262	 13	118.5	27.5	 16
263	 13	359.3	55.5	 16
264	 13	80.0	12.0	 16
265	 13	128.5	21.6	 16
266	 13	308.3	70.9	 16
267	 13	254.5	29.9	 16
268	 13	80.5	13.4	 16
269	 13	306.0	42.0	 16
270	 13	357.0	78.7	 16
271	 13	105.3	23.0	 16
272	 13	103.5	17.4	 16
273	 13	95.5	15.6	 16
274	 13	79.5	15.0	 16
275	 13	94.0	11.8	 16
276	 13	2536.3	227.8	 16
277	 13	127.0	20.3	 16
278	 13	102.5	17.0	 16
279	 13	105.3	21.1	 16
280	 13	76.3	14.3	 16
281	 13	67.3	12.7	 16
282	 13	97.8	20.5	 16
283	 13	170.5	25.5	 16
284	 13	68.3	28.1	 16
285	 13	90.0	15.6	 16
286	 13	799.5	97.0	 16
287	 13	249.3	45.0	 16
288	 13	90.8	19.6	 16
289	 13	82.3	14.3	 16
290	 13	300.8	60.9	 16
291	 13	94.3	10.1	 16
292	 13	263.0	48.2	 16
293	 13	77.5	11.7	 16
294	 13	172.3	24.0	 16
295	 13	281.0	64.5	 16
296	 13	138.3	22.0	 16
297	 13	190.8	20.8	 16
298	 13	364.3	28.3	 16
299	 13	256.0	28.7	 16
300	 13	241.5	25.4	 16
301	 13	140.0	19.9	 16
302	 13	298.0	31.4	 16
303	 13	340.5	55.4	 16
304	 13	494.0	41.3	 16
305	 13	357.8	49.8	 16
306	 13	512.8	53.1	 16
307	 13	88.8	11.9	 16
308	 13	95.5	13.0	 16
309	 13	355.5	37.5	 16
310	 13	512.0	78.5	 16
311	 13	132.5	25.0	 16
312	 13	121.3	25.6	 16
313	 13	108.5	11.0	 16
314	 13	113.5	15.9	 16
315	 13	84.0	17.4	 16
316	 13	153.3	30.3	 16
317	 13	124.5	48.5	 16
318	 13	64.3	12.9	 16
319	 13	78.8	13.0	 16
320	 13	133.5	20.3	 16
321	 13	100.5	15.6	 16
322	 13	160.5	19.3	 16
323	 13	1583.0	157.5	 16
324	 13	108.5	18.3	 16
325	 13	182.0	17.2	 16
326	 13	195.5	31.0	 16
327	 13	132.8	15.6	 16
328	 13	77.0	15.7	 16
329	 13	697.3	75.9	 16
330	 13	577.0	67.3	 16
331	 13	452.8	49.4	 16
332	 13	273.5	34.3	 16
333	 13	247.5	38.5	 16
334	 13	78.8	24.4	 16
335	 13	67.8	20.0	 16
336	 13	68.0	15.1	 16
337	 13	70.0	8.1	 16
338	 13	228.8	48.7	 16
339	 13	225.8	28.2	 16
340	 13	300.3	56.8	 16
341	 13	2658.3	695.3	 20
342	 13	125.0	28.3	 16
343	 13	69.3	14.0	 16
344	 13	69.0	9.5	 16
345	 13	177.5	28.4	 16
346	 13	463.3	129.4	 16
347	 13	71.5	12.2	 16
348	 13	204.3	41.6	 16
349	 13	827.0	171.5	 16
350	 13	2298.8	452.6	 16
351	 13	307.5	58.0	 16
352	 13	180.8	28.1	 16
353	 13	2235.0	493.2	 16
354	 13	462.0	95.2	 16
355	 13	298.8	37.0	 16
356	 13	206.0	31.3	 16
357	 13	169.8	27.0	 16
358	 13	79.3	16.1	 16
359	 13	66.0	10.3	 16
360	 13	78.0	10.7	 16
361	 13	318.3	51.8	 16
362	 13	110.8	19.3	 16
363	 13	75.5	12.6	 16
364	 13	59.0	14.4	 16
365	 13	71.3	12.3	 16
366	 13	79.3	13.0	 16
367	 13	461.5	74.1	 16
368	 13	60.5	7.5	 16
369	 13	149.5	24.1	 16
370	 13	362.0	87.6	 16
371	 13	472.8	72.7	 16
372	 13	215.5	36.5	 16
373	 13	115.0	17.2	 16
374	 13	74.0	14.3	 16
375	 13	138.3	17.6	 16
376	 13	97.3	11.6	 16
377	 13	199.5	31.3	 16
378	 13	92.8	20.7	 16
379	 13	307.0	49.5	 16
380	 13	294.3	48.2	 16
381	 13	63.3	14.3	 16
382	 13	77.8	13.6	 16
383	 13	123.5	24.5	 16
384	 13	395.0	52.1	 16
385	 13	75.3	12.5	 16
386	 13	126.0	20.8	 16
387	 13	73.3	17.1	 16
388	 13	102.3	12.7	 16
389	 13	82.3	13.3	 16
390	 13	198.5	28.9	 16
391	 13	209.5	31.9	 16
392	 13	65.0	12.5	 16
393	 13	68.3	13.3	 16
394	 13	350.5	47.5	 16
395	 13	78.0	13.6	 16
396	 13	274.5	40.8	 16
397	 13	206.3	29.7	 16
398	 13	144.8	29.5	 16
399	 13	94.0	15.6	 16
400	 13	602.0	60.2	 16
401	 13	476.5	61.3	 16
402	 13	120.0	22.1	 16
403	 13	78.8	16.9	 16
404	 13	111.8	21.3	 16
405	 13	70.5	14.0	 16
406	 13	225.8	28.4	 16
407	 13	226.5	28.8	 16
408	 13	100.8	22.0	 16
409	 13	102.3	19.6	 16
410	 13	337.3	72.7	 16
411	 13	128.5	20.9	 16
412	 13	87.0	13.9	 16
413	 13	506.5	75.5	 16
414	 13	498.3	90.3	 16
415	 13	238.0	31.0	 16
416	 13	199.5	22.7	 16
417	 13	181.0	26.4	 16
418	 13	183.3	23.1	 16
419	 13	144.0	29.0	 16
420	 13	88.5	11.9	 16
421	 13	67.0	12.9	 16
422	 13	220.3	27.3	 16
423	 13	80.5	11.0	 16
424	 13	147.8	30.8	 16
425	 13	98.5	12.6	 16
426	 13	75.0	13.7	 16
427	 13	571.8	70.5	 16
428	 13	113.0	18.7	 16
429	 13	326.3	43.4	 16
430	 13	109.5	16.1	 16
431	 13	282.8	44.6	 16
432	 13	1163.3	180.2	 16
433	 13	1468.5	281.6	 16
434	 13	1105.0	166.1	 16
435	 13	164.0	28.8	 16
436	 13	100.8	22.0	 16
437	 13	411.0	66.2	 16
438	 13	187.5	48.4	 16
439	 13	2219.3	227.2	 16
440	 13	136.5	22.9	 16
441	 13	258.5	38.3	 16
442	 13	185.0	32.6	 16
443	 13	102.5	19.2	 16
444	 13	159.0	19.8	 16
445	 13	68.8	12.2	 16
446	 13	112.5	10.8	 16
447	 13	74.0	14.7	 16
448	 13	101.0	16.3	 16
449	 13	79.3	37.0	 16
450	 13	64.0	14.2	 16
451	 13	70.3	13.8	 16
452	 13	80.0	16.0	 16
453	 13	90.0	15.4	 16
454	 13	80.3	14.6	 16
455	 13	487.5	75.8	 16
456	 13	60.3	10.6	 16
457	 13	168.0	61.1	 16
458	 13	136.3	27.8	 16
459	 13	120.5	16.5	 16
460	 13	112.5	17.1	 20
461	 13	155.3	26.6	 16
462	 13	879.8	185.2	 16
463	 13	214.0	42.3	 16
464	 13	89.0	11.5	 16
465	 13	263.3	28.2	 16
466	 13	214.5	33.3	 16
467	 13	722.8	154.3	 16
468	 13	73.8	28.9	 16
469	 13	191.3	35.4	 16
470	 13	125.3	14.0	 16
471	 13	381.8	75.8	 16
472	 13	98.3	19.0	 16
473	 13	391.5	77.3	 16
474	 13	167.5	22.3	 16
475	 13	86.3	21.1	 16
476	 13	74.5	19.4	 16
477	 13	114.0	20.0	 16
478	 13	62.0	7.6	 16
479	 13	84.3	22.1	 16
480	 13	10396.0	1793.1	 16
481	 13	742.3	154.7	 16
482	 13	215.5	52.2	 16
483	 13	85.0	61.5	 16
484	 13	63.3	11.8	 16
485	 13	669.8	126.1	 16
486	 13	679.3	119.6	 16
487	 13	623.0	131.7	 16
488	 13	226.5	28.3	 16
489	 13	77.5	15.2	 16
490	 13	88.8	16.7	 16
491	 13	79.5	22.9	 16
492	 13	68.3	13.2	 16
493	 13	64.3	10.8	 16
494	 13	88.3	17.1	 16
495	 13	118.3	12.8	 16
496	 13	84.3	18.0	 16
497	 13	222.8	43.1	 16
498	 13	72.5	16.5	 16
499	 13	145.8	18.5	 16
500	 13	220.8	46.0	 16
501	 13	102.0	19.3	 16
502	 13	120.8	28.5	 16
503	 13	64.5	17.1	 16
504	 13	130.3	21.9	 16
505	 13	77.0	12.9	 16
506	 13	297.8	52.5	 16
507	 13	167.5	26.8	 16
508	 13	1451.3	297.2	 16
509	 13	642.0	124.9	 16
510	 13	143.3	22.6	 16
511	 13	192.8	27.7	 16
512	 13	107.5	14.4	 16
513	 13	189.3	25.7	 16
514	 13	250.5	21.6	 16
515	 13	304.5	40.2	 16
516	 13	169.5	17.5	 16
517	 13	141.5	38.0	 16
518	 13	84.8	18.3	 16
519	 13	168.5	29.2	 16
520	 13	94.0	22.5	 16
521	 13	92.3	11.5	 16
522	 13	155.3	17.4	 16
523	 13	152.8	20.1	 16
524	 13	150.3	22.2	 16
525	 13	62.5	7.9	 16
526	 13	72.3	12.2	 16
527	 13	187.8	26.5	 16
528	 13	250.0	39.3	 16
529	 13	180.3	17.2	 16
530	 13	175.3	26.3	 16
531	 13	68.0	14.5	 16
532	 13	199.0	29.7	 16
533	 13	87.3	22.1	 16
534	 13	88.0	16.4	 16
535	 13	689.0	84.4	 16
536	 13	88.3	15.4	 16
537	 13	117.3	17.9	 16
538	 13	158.3	23.7	 16
539	 13	140.0	25.2	 16
540	 13	108.0	15.1	 16
541	 13	191.5	32.9	 16
542	 13	62.3	10.2	 16
543	 13	145.3	26.3	 16
544	 13	57.3	10.0	 16
545	 13	195.3	34.0	 16
546	 13	358.5	60.4	 16
547	 13	1013.8	110.3	 16
548	 13	607.0	54.4	 16
549	 13	232.3	40.7	 16
550	 13	76.3	11.6	 16
551	 13	135.8	22.5	 16
552	 13	72.0	12.5	 16
553	 13	2778.0	580.3	 16
554	 13	60.3	11.0	 16
555	 13	53.8	7.3	 16
556	 13	963.0	197.0	 16
557	 13	85.5	18.0	 16
558	 13	75.8	13.1	 16
559	 13	107.3	20.7	 16
560	 13	113.5	20.9	 16
561	 13	76.8	13.3	 16
562	 13	264.8	50.2	 16
563	 13	932.8	127.7	 16
564	 13	166.0	74.1	 16
565	 13	105.3	16.2	 16
566	 13	290.0	55.9	 16
567	 13	491.0	73.2	 16
568	 13	204.8	15.1	 16
569	 13	167.5	29.5	 16
570	 13	91.3	13.9	 16
571	 13	67.3	12.3	 16
572	 13	121.3	31.2	 16
573	 13	185.0	34.9	 16
574	 13	111.3	16.4	 16
575	 13	134.3	22.5	 16
576	 13	151.0	24.8	 16
577	 13	111.0	14.5	 16
578	 13	273.8	39.9	 16
579	 13	793.5	163.7	 20
580	 13	216.5	49.6	 16
581	 13	169.8	33.5	 16
582	 13	154.5	22.5	 16
583	 13	141.0	16.4	 16
584	 13	558.5	45.3	 16
585	 13	115.0	13.0	 16
586	 13	102.8	27.1	 16
587	 13	239.8	30.9	 16
588	 13	61.0	10.9	 16
589	 13	93.3	14.5	 16
590	 13	86.3	19.2	 16
591	 13	310.3	29.5	 16
592	 13	1116.3	132.4	 16
593	 13	127.5	20.8	 16
594	 13	321.3	22.7	 16
595	 13	549.5	71.8	 16
596	 13	84.3	16.0	 16
597	 13	1972.3	301.6	 16
598	 13	245.3	29.4	 16
599	 13	142.8	19.1	 16
600	 13	110.8	18.6	 16
601	 13	128.0	21.3	 16
602	 13	194.3	34.6	 16
603	 13	67.5	8.7	 16
604	 13	118.3	23.7	 16
605	 13	190.5	31.4	 16
606	 13	249.3	31.6	 16
607	 13	167.0	84.2	 16
608	 13	113.0	16.3	 16
609	 13	114.3	22.7	 16
610	 13	69.0	21.2	 16
611	 13	60.5	9.2	 16
612	 13	93.0	16.2	 16
613	 13	119.3	14.8	 16
614	 13	154.8	15.4	 16
615	 13	223.0	23.9	 16
616	 13	316.3	30.4	 16
617	 13	129.3	22.8	 16
618	 13	234.0	38.2	 16
619	 13	268.0	33.6	 16
620	 13	74.8	11.5	 16
621	 13	101.8	31.1	 16
622	 13	146.0	22.0	 16
623	 13	330.3	52.3	 16
624	 13	104.0	21.3	 16
625	 13	86.5	16.2	 16
626	 13	93.3	16.2	 16
627	 13	70.0	12.8	 16
628	 13	74.3	14.4	 16
629	 13	76.0	15.7	 16
630	 13	1690.3	113.2	 16
631	 13	2338.8	185.6	 16
632	 13	111.5	16.6	 16
633	 13	272.0	36.4	 16
634	 13	672.8	54.7	 16
635	 13	497.8	68.2	 16
636	 13	643.5	75.2	 16
637	 13	60.5	11.0	 16
638	 13	540.3	76.4	 16
639	 13	101.0	16.4	 16
640	 13	192.0	25.8	 16
641	 13	177.3	27.8	 16
642	 13	137.8	25.0	 16
643	 13	93.5	15.6	 16
644	 13	83.8	12.5	 16
645	 13	171.3	24.7	 16
646	 13	101.3	17.4	 16
647	 13	209.3	30.5	 16
648	 13	80.3	15.5	 16
649	 13	65.3	12.1	 16
650	 13	112.3	30.6	 16
651	 13	83.0	11.7	 16
652	 13	273.3	47.4	 16
653	 13	79.3	13.9	 16
654	 13	81.5	13.2	 16
655	 13	64.0	9.4	 16
656	 13	61.5	11.3	 16
657	 13	74.5	25.4	 16
658	 13	393.3	30.4	 16
659	 13	738.8	91.0	 16
660	 13	1589.3	174.1	 16
661	 13	202.8	27.8	 16
662	 13	133.0	13.3	 16
663	 13	303.5	35.6	 16
664	 13	1323.3	301.3	 16
665	 13	128.5	16.3	 16
666	 13	1450.3	197.0	 16
667	 13	69.5	17.4	 16
668	 13	507.0	91.8	 16
669	 13	58.8	10.0	 16
670	 13	109.0	18.8	 16
671	 13	76.3	10.4	 16
672	 13	79.3	13.7	 16
673	 13	106.3	23.9	 16
674	 13	66.5	12.4	 16
675	 13	59.3	14.3	 16
676	 13	107.5	21.7	 16
677	 13	211.3	29.9	 16
678	 13	98.3	20.8	 16
679	 13	120.5	20.8	 16
680	 13	1478.3	200.0	 16
681	 13	101.3	26.4	 16
682	 13	142.0	21.1	 16
683	 13	94.0	11.7	 16
684	 13	189.5	22.0	 16
685	 13	162.0	24.9	 16
686	 13	77.3	13.5	 16
687	 13	68.3	12.8	 16
688	 13	113.0	23.0	 16
689	 13	926.3	138.2	 16
690	 13	123.5	24.2	 16
691	 13	261.0	40.4	 16
692	 13	280.5	25.7	 16
693	 13	328.5	46.8	 16
694	 13	89.5	13.6	 16
695	 13	125.8	27.6	 16
696	 13	218.8	67.6	 16
697	 13	105.0	16.6	 20
698	 13	2226.5	471.5	 16
699	 13	243.3	23.6	 16
700	 13	147.0	18.4	 16
701	 13	225.0	33.2	 16
702	 13	1370.5	143.5	 16
703	 13	307.3	59.4	 16
704	 13	144.0	20.8	 16
705	 13	114.3	13.9	 16
706	 13	110.8	17.6	 16
707	 13	1106.0	177.5	 16
708	 13	171.0	19.7	 16
709	 13	190.3	23.9	 16
710	 13	1211.8	190.9	 16
711	 13	96.5	14.4	 16
  0	 14	4399.8	676.5	 16
  1	 14	191.5	21.8	 16
  2	 14	98.8	18.2	 16
  3	 14	74.5	11.4	 16
  4	 14	107.3	16.7	 16
  5	 14	89.3	17.8	 16
  6	 14	123.8	81.4	 16
  7	 14	87.8	22.1	 16
  8	 14	220.0	20.9	 16
  9	 14	114.3	13.3	 16
 10	 14	78.0	17.7	 16
 11	 14	67.0	13.2	 16
 12	 14	80.5	11.8	 16
 13	 14	64.3	8.5	 16
 14	 14	70.5	19.7	 16
 15	 14	226.5	37.0	 16
 16	 14	213.0	28.2	 16
 17	 14	95.0	15.2	 16
 18	 14	75.3	9.6	 16
 19	 14	80.0	14.4	 16
 20	 14	88.0	15.0	 16
 21	 14	93.3	39.4	 16
 22	 14	77.3	15.6	 16
 23	 14	61.0	8.1	 16
 24	 14	68.5	13.4	 16
 25	 14	62.5	11.1	 16
 26	 14	80.3	14.7	 16
 27	 14	126.3	23.6	 16
 28	 14	59.5	11.9	 16
 29	 14	58.3	7.4	 16
 30	 14	67.0	9.5	 16
 31	 14	146.8	34.0	 16
 32	 14	74.5	10.3	 16
 33	 14	67.8	14.5	 16
 34	 14	128.3	37.5	 16
 35	 14	86.5	28.8	 16
 36	 14	83.8	17.6	 16
 37	 14	110.3	20.7	 16
 38	 14	73.5	12.9	 16
 39	 14	105.8	14.3	 16
 40	 14	74.3	14.4	 16
 41	 14	251.5	42.0	 16
 42	 14	68.3	10.6	 16
 43	 14	70.3	12.4	 16
 44	 14	72.3	14.2	 16
 45	 14	215.5	35.5	 16
 46	 14	198.0	31.1	 16
 47	 14	1418.3	197.5	 16
 48	 14	209.0	24.8	 16
 49	 14	97.3	31.2	 16
 50	 14	75.8	14.5	 16
 51	 14	502.5	96.4	 16
 52	 14	82.8	11.6	 16
 53	 14	76.5	16.0	 16
 54	 14	68.0	8.2	 16
 55	 14	66.5	11.6	 16
 56	 14	66.5	13.4	 16
 57	 14	69.5	12.9	 16
 58	 14	60.8	7.6	 16
 59	 14	74.0	13.9	 16
 60	 14	88.5	17.3	 16
 61	 14	84.0	16.8	 16
 62	 14	145.5	16.3	 16
 63	 14	160.8	31.8	 16
 64	 14	259.8	47.4	 16
 65	 14	73.0	11.4	 16
 66	 14	86.3	17.1	 16
 67	 14	107.8	17.8	 16
 68	 14	100.3	73.6	 16
 69	 14	74.8	10.1	 16
 70	 14	60.0	9.7	 16
 71	 14	93.0	13.8	 16
 72	 14	71.3	11.6	 16
 73	 14	68.0	12.4	 16
 74	 14	72.0	11.4	 16
 75	 14	66.0	9.2	 16
 76	 14	74.0	12.1	 16
 77	 14	538.8	179.0	 16
 78	 14	78.8	15.8	 16
 79	 14	75.5	17.6	 16
 80	 14	120.8	23.2	 16
 81	 14	84.3	16.4	 16
 82	 14	81.3	14.9	 16
 83	 14	71.8	10.2	 16
 84	 14	60.3	9.7	 16
 85	 14	68.5	14.1	 16
 86	 14	139.5	19.3	 16
 87	 14	78.8	14.4	 16
 88	 14	316.5	32.8	 16
 89	 14	547.8	38.5	 16
 90	 14	98.0	27.7	 16
 91	 14	259.3	34.4	 16
 92	 14	76.8	12.0	 16
 93	 14	99.3	14.5	 16
 94	 14	198.5	24.0	 16
 95	 14	79.5	14.4	 16
 96	 14	67.3	10.3	 16
 97	 14	60.5	12.9	 16
 98	 14	62.0	15.5	 16
 99	 14	68.0	10.8	 16
100	 14	76.8	13.7	 16
101	 14	260.3	53.2	 16
102	 14	73.5	9.8	 16
103	 14	86.5	12.3	 16
104	 14	68.3	10.4	 16
105	 14	76.0	14.5	 16
106	 14	112.3	18.5	 16
107	 14	56.0	8.0	 20
108	 14	61.5	13.6	 16
109	 14	61.0	12.0	 16
110	 14	98.3	13.5	 16
111	 14	79.3	19.4	 16
112	 14	133.8	17.9	 16
113	 14	90.8	17.1	 16
114	 14	94.8	21.4	 16
115	 14	77.3	13.7	 16
116	 14	96.5	22.8	 16
117	 14	87.0	19.5	 16
118	 14	86.0	20.5	 16
119	 14	134.8	22.4	 16
120	 14	545.3	116.8	 16
121	 14	87.3	14.7	 16
122	 14	68.0	12.7	 16
123	 14	93.3	55.1	 16
124	 14	104.5	13.0	 16
125	 14	133.3	20.8	 16
126	 14	200.3	44.3	 16
127	 14	106.3	14.4	 16
128	 14	71.8	12.4	 16
129	 14	192.3	28.7	 16
130	 14	99.5	18.5	 16
131	 14	82.3	18.9	 16
132	 14	78.0	10.5	 16
133	 14	99.8	15.1	 16
134	 14	480.0	103.7	 16
135	 14	91.5	12.5	 16
136	 14	68.5	8.7	 16
137	 14	70.5	12.2	 16
138	 14	443.8	53.3	 16
139	 14	75.5	12.5	 16
140	 14	72.5	12.8	 16
141	 14	63.3	10.7	 16
142	 14	58.5	11.0	 16
143	 14	76.3	12.6	 16
144	 14	96.8	16.6	 16
145	 14	231.0	30.9	 16
146	 14	532.0	93.8	 16
147	 14	65.8	7.7	 16
148	 14	206.3	25.9	 16
149	 14	87.8	19.6	 16
150	 14	88.5	21.8	 16
151	 14	73.0	12.8	 16
152	 14	80.3	17.1	 16
153	 14	2582.3	337.3	 16
154	 14	83.5	12.3	 16
155	 14	73.3	14.3	 16
156	 14	119.5	12.7	 16
157	 14	145.3	19.0	 16
158	 14	254.5	27.2	 16
159	 14	132.8	18.5	 16
160	 14	65.8	14.2	 16
161	 14	89.8	20.9	 16
162	 14	74.0	11.8	 16
163	 14	66.3	9.3	 16
164	 14	106.3	17.6	 16
165	 14	77.8	16.1	 16
166	 14	80.0	11.1	 16
167	 14	88.3	15.0	 16
168	 14	83.8	13.1	 16
169	 14	63.8	13.7	 16
170	 14	62.3	11.6	 16
171	 14	59.0	11.2	 16
172	 14	84.5	14.9	 16
173	 14	68.0	12.1	 16
174	 14	77.5	13.5	 16
175	 14	80.0	15.1	 16
176	 14	92.8	18.3	 16
177	 14	96.3	11.6	 16
178	 14	87.5	17.3	 16
179	 14	66.3	11.9	 16
180	 14	181.3	24.1	 16
181	 14	151.8	22.2	 16
182	 14	321.8	36.4	 16
183	 14	60.3	12.5	 16
184	 14	88.8	17.6	 16
185	 14	81.5	13.5	 16
186	 14	356.8	54.2	 16
187	 14	95.0	16.9	 16
188	 14	140.0	18.4	 16
189	 14	155.5	18.8	 16
190	 14	127.0	15.4	 16
191	 14	116.0	21.6	 16
192	 14	86.5	19.9	 16
193	 14	77.5	10.5	 16
194	 14	89.0	11.8	 16
195	 14	111.8	17.4	 16
196	 14	177.3	29.6	 16
197	 14	69.0	13.6	 16
198	 14	107.0	19.3	 16
199	 14	96.5	10.8	 16
200	 14	148.3	19.3	 16
201	 14	67.5	12.8	 16
202	 14	73.3	13.7	 16
203	 14	89.8	12.3	 16
204	 14	59.3	10.0	 16
205	 14	76.8	15.1	 16
206	 14	79.3	13.7	 16
207	 14	71.5	16.8	 16
208	 14	60.3	9.9	 16
209	 14	69.0	11.7	 16
210	 14	94.3	18.0	 16
211	 14	83.3	24.0	 16
212	 14	722.3	93.1	 16
213	 14	85.0	15.2	 16
214	 14	63.5	9.8	 16
215	 14	91.3	40.5	 16
216	 14	66.5	10.8	 16
217	 14	61.3	8.5	 16
218	 14	64.0	15.2	 16
219	 14	61.8	10.1	 16
220	 14	109.8	13.1	 16
221	 14	107.8	20.8	 16
222	 14	101.3	16.2	 16
223	 14	324.5	35.6	 16
224	 14	81.0	15.4	 16
225	 14	88.0	18.2	 16
226	 14	89.3	17.0	 20
227	 14	109.3	19.3	 16
228	 14	145.0	21.7	 16
229	 14	97.3	16.6	 16
230	 14	81.8	24.5	 16
231	 14	161.8	17.7	 16
232	 14	180.5	25.1	 16
233	 14	316.5	40.7	 16
234	 14	166.5	142.9	 16
235	 14	626.5	71.7	 16
236	 14	292.5	84.8	 16
237	 14	5072.0	269.1	 16
238	 14	4392.8	504.5	 16
239	 14	539.3	96.6	 16
240	 14	140.0	26.5	 16
241	 14	875.5	90.8	 16
242	 14	733.5	155.2	 16
243	 14	114.8	11.7	 16
244	 14	85.5	18.7	 16
245	 14	64.3	12.6	 16
246	 14	98.8	15.6	 16
247	 14	80.5	14.5	 16
248	 14	80.5	10.8	 16
249	 14	65.3	13.8	 16
250	 14	67.3	12.6	 16
251	 14	63.8	8.9	 16
252	 14	68.3	9.5	 16
253	 14	79.3	12.6	 16
254	 14	79.3	12.9	 16
255	 14	84.5	16.3	 16
256	 14	196.8	34.2	 16
257	 14	99.8	19.1	 16
258	 14	101.3	24.9	 16
259	 14	68.0	12.7	 16
260	 14	62.3	69.2	 16
261	 14	63.8	14.9	 16
262	 14	68.8	13.7	 16
263	 14	156.3	28.1	 16
264	 14	68.3	11.4	 16
265	 14	87.5	13.3	 16
266	 14	87.3	20.0	 16
267	 14	342.3	48.1	 16
268	 14	97.3	11.3	 16
269	 14	301.5	30.6	 16
270	 14	127.0	20.4	 16
271	 14	88.3	12.9	 16
272	 14	108.3	33.5	 16
273	 14	76.3	10.0	 16
274	 14	64.5	10.7	 16
275	 14	76.3	7.7	 16
276	 14	153.0	22.3	 16
277	 14	74.5	9.8	 16
278	 14	71.0	14.5	 16
279	 14	74.0	14.5	 16
280	 14	81.3	13.3	 16
281	 14	57.8	10.9	 16
282	 14	137.3	19.3	 16
283	 14	212.5	30.4	 16
284	 14	59.5	13.8	 16
285	 14	88.8	16.0	 16
286	 14	315.5	36.3	 16
287	 14	78.3	9.9	 16
288	 14	72.5	13.1	 16
289	 14	99.0	20.1	 16
290	 14	68.5	13.8	 16
291	 14	56.8	9.7	 16
292	 14	96.5	19.6	 16
293	 14	79.0	12.0	 16
294	 14	115.5	19.8	 16
295	 14	163.3	23.5	 16
296	 14	158.0	21.7	 16
297	 14	72.5	15.3	 16
298	 14	89.3	17.1	 16
299	 14	140.0	20.0	 16
300	 14	103.0	10.4	 16
301	 14	160.8	18.5	 16
302	 14	92.3	116.2	 16
303	 14	103.0	19.4	 16
304	 14	183.5	32.3	 16
305	 14	87.0	16.0	 16
306	 14	163.0	63.2	 16
307	 14	137.5	16.8	 16
308	 14	83.0	16.5	 16
309	 14	176.5	18.8	 16
310	 14	169.3	19.4	 16
311	 14	97.0	20.3	 16
312	 14	86.0	16.6	 16
313	 14	74.8	11.5	 16
314	 14	87.8	16.8	 16
315	 14	76.0	16.9	 16
316	 14	106.3	17.0	 16
317	 14	114.8	14.5	 16
318	 14	65.0	9.8	 16
319	 14	76.5	11.7	 16
320	 14	78.3	7.6	 16
321	 14	94.0	9.2	 16
322	 14	127.5	23.7	 16
323	 14	261.0	25.5	 16
324	 14	103.5	19.1	 16
325	 14	552.8	59.6	 16
326	 14	99.0	18.5	 16
327	 14	82.5	13.2	 16
328	 14	70.0	13.0	 16
329	 14	104.3	19.0	 16
330	 14	85.3	15.8	 16
331	 14	168.8	16.2	 16
332	 14	119.0	25.0	 16
333	 14	114.3	20.3	 16
334	 14	66.5	13.4	 16
335	 14	59.5	8.9	 16
336	 14	64.3	12.1	 16
337	 14	64.8	9.4	 16
338	 14	105.0	18.3	 16
339	 14	390.3	40.2	 16
340	 14	211.5	26.7	 16
341	 14	246.0	63.0	 16
342	 14	69.3	15.9	 16
343	 14	62.0	8.7	 16
344	 14	72.5	14.6	 20
345	 14	78.5	18.2	 16
346	 14	71.5	17.1	 16
347	 14	71.0	13.2	 16
348	 14	89.0	15.8	 16
349	 14	113.8	18.6	 16
350	 14	220.0	43.8	 16
351	 14	170.0	22.7	 16
352	 14	72.3	12.7	 16
353	 14	310.0	70.7	 16
354	 14	81.3	10.3	 16
355	 14	152.0	24.9	 16
356	 14	305.0	31.6	 16
357	 14	245.0	30.4	 16
358	 14	109.3	18.8	 16
359	 14	74.3	14.9	 16
360	 14	73.3	12.2	 16
361	 14	179.5	27.1	 16
362	 14	96.8	19.2	 16
363	 14	72.0	13.9	 16
364	 14	78.3	18.4	 16
365	 14	74.3	15.4	 16
366	 14	96.5	18.9	 16
367	 14	164.3	31.6	 16
368	 14	56.0	11.2	 16
369	 14	66.5	12.9	 16
370	 14	151.3	20.1	 16
371	 14	195.0	27.5	 16
372	 14	240.3	31.5	 16
373	 14	143.8	36.3	 16
374	 14	60.5	12.1	 16
375	 14	105.3	22.7	 16
376	 14	79.0	12.3	 16
377	 14	222.0	20.1	 16
378	 14	82.0	16.1	 16
379	 14	177.5	23.0	 16
380	 14	170.0	31.6	 16
381	 14	66.3	9.6	 16
382	 14	93.0	22.4	 16
383	 14	94.3	7.8	 16
384	 14	133.3	16.2	 16
385	 14	66.5	13.1	 16
386	 14	70.5	12.1	 16
387	 14	72.8	9.2	 16
388	 14	93.0	14.1	 16
389	 14	107.8	20.7	 16
390	 14	93.8	13.5	 16
391	 14	94.0	10.7	 16
392	 14	65.0	12.3	 16
393	 14	61.5	8.7	 16
394	 14	281.3	25.8	 16
395	 14	70.5	10.5	 16
396	 14	144.8	32.6	 16
397	 14	224.3	34.3	 16
398	 14	88.8	12.0	 16
399	 14	95.0	17.7	 16
400	 14	115.5	24.1	 16
401	 14	105.3	9.7	 16
402	 14	78.5	12.3	 16
403	 14	68.0	16.4	 16
404	 14	73.3	11.9	 16
405	 14	60.5	10.4	 16
406	 14	232.5	29.7	 16
407	 14	198.5	21.2	 16
408	 14	60.0	10.8	 16
409	 14	87.8	17.6	 16
410	 14	72.5	13.9	 16
411	 14	70.8	10.7	 16
412	 14	85.8	18.4	 16
413	 14	127.8	19.5	 16
414	 14	102.8	16.9	 16
415	 14	115.5	20.6	 16
416	 14	63.0	13.3	 16
417	 14	73.5	10.4	 16
418	 14	133.8	17.0	 16
419	 14	129.5	108.4	 16
420	 14	75.0	9.5	 16
421	 14	71.0	10.6	 16
422	 14	85.3	16.9	 16
423	 14	73.5	15.1	 16
424	 14	84.0	12.4	 16
425	 14	81.5	9.6	 16
426	 14	63.0	7.8	 16
427	 14	106.3	21.7	 16
428	 14	116.3	14.3	 16
429	 14	133.5	19.6	 16
430	 14	75.3	12.6	 16
431	 14	147.0	21.3	 16
432	 14	213.3	43.7	 16
433	 14	264.0	43.0	 16
434	 14	235.5	33.6	 16
435	 14	70.0	9.9	 16
436	 14	67.0	11.5	 16
437	 14	116.8	20.7	 16
438	 14	209.5	18.8	 16
439	 14	145.0	21.0	 16
440	 14	80.3	18.2	 16
441	 14	89.0	12.7	 16
442	 14	118.3	15.6	 16
443	 14	88.0	29.6	 16
444	 14	71.0	13.9	 16
445	 14	75.5	14.2	 16
446	 14	89.3	11.4	 16
447	 14	68.3	9.8	 16
448	 14	75.0	14.3	 16
449	 14	61.0	8.9	 16
450	 14	71.5	11.3	 16
451	 14	65.3	9.6	 16
452	 14	65.0	13.4	 16
453	 14	72.5	18.4	 16
454	 14	82.0	12.8	 16
455	 14	87.3	15.2	 16
456	 14	50.8	9.7	 16
457	 14	67.3	12.3	 16
458	 14	108.5	18.0	 16
459	 14	94.5	29.1	 16
460	 14	106.0	20.7	 16
461	 14	75.0	12.0	 16
462	 14	180.0	38.6	 16
463	 14	65.0	11.8	 20
464	 14	70.0	11.3	 16
465	 14	119.5	22.8	 16
466	 14	92.5	17.9	 16
467	 14	118.3	27.1	 16
468	 14	69.8	10.1	 16
469	 14	58.0	10.5	 16
470	 14	177.0	28.2	 16
471	 14	132.3	30.4	 16
472	 14	69.3	7.6	 16
473	 14	107.3	18.2	 16
474	 14	92.0	39.0	 16
475	 14	74.3	9.0	 16
476	 14	67.3	8.2	 16
477	 14	68.5	10.6	 16
478	 14	74.3	12.4	 16
479	 14	71.5	12.8	 16
480	 14	4545.0	789.3	 16
481	 14	199.8	32.4	 16
482	 14	57.3	13.2	 16
483	 14	76.3	15.9	 16
484	 14	60.0	9.9	 16
485	 14	207.0	47.3	 16
486	 14	219.3	37.4	 16
487	 14	158.8	37.7	 16
488	 14	100.3	18.4	 16
489	 14	83.3	12.8	 16
490	 14	66.3	11.0	 16
491	 14	72.3	12.5	 16
492	 14	58.3	11.2	 16
493	 14	56.5	12.2	 16
494	 14	55.3	6.1	 16
495	 14	193.3	31.7	 16
496	 14	81.0	13.8	 16
497	 14	66.3	11.1	 16
498	 14	57.3	8.4	 16
499	 14	185.5	33.5	 16
500	 14	62.8	10.8	 16
501	 14	57.0	9.4	 16
502	 14	54.5	10.1	 16
503	 14	55.3	9.2	 16
504	 14	62.3	10.7	 16
505	 14	66.3	10.8	 16
506	 14	131.8	19.3	 16
507	 14	62.5	12.2	 16
508	 14	254.8	52.4	 16
509	 14	147.8	31.0	 16
510	 14	88.3	15.1	 16
511	 14	108.3	20.1	 16
512	 14	92.5	16.8	 16
513	 14	111.3	45.8	 16
514	 14	158.3	30.9	 16
515	 14	123.0	13.0	 16
516	 14	150.3	17.2	 16
517	 14	91.3	17.1	 16
518	 14	91.0	17.1	 16
519	 14	113.8	24.5	 16
520	 14	88.0	15.0	 16
521	 14	108.3	13.6	 16
522	 14	208.5	21.8	 16
523	 14	163.0	16.5	 16
524	 14	113.0	17.8	 16
525	 14	57.3	9.4	 16
526	 14	81.3	15.0	 16
527	 14	72.5	12.3	 16
528	 14	156.8	23.0	 16
529	 14	126.0	18.8	 16
530	 14	64.3	10.7	 16
531	 14	70.0	11.9	 16
532	 14	83.5	14.1	 16
533	 14	61.3	12.4	 16
534	 14	66.0	6.8	 16
535	 14	112.0	17.4	 16
536	 14	95.3	14.0	 16
537	 14	121.0	16.5	 16
538	 14	142.5	16.4	 16
539	 14	121.8	25.9	 16
540	 14	87.3	15.4	 16
541	 14	143.5	17.7	 16
542	 14	55.5	8.8	 16
543	 14	86.3	13.0	 16
544	 14	87.0	14.0	 16
545	 14	66.0	13.3	 16
546	 14	81.8	12.5	 16
547	 14	408.8	34.4	 16
548	 14	427.5	35.6	 16
549	 14	227.5	26.3	 16
550	 14	70.0	9.2	 16
551	 14	127.8	20.7	 16
552	 14	99.3	16.7	 16
553	 14	656.0	107.9	 16
554	 14	77.3	16.2	 16
555	 14	54.3	13.6	 16
556	 14	125.3	24.7	 16
557	 14	84.0	12.9	 16
558	 14	73.3	13.7	 16
559	 14	168.0	21.3	 16
560	 14	106.8	21.0	 16
561	 14	68.0	8.5	 16
562	 14	84.0	13.7	 16
563	 14	172.5	36.6	 16
564	 14	192.5	29.5	 16
565	 14	90.5	14.9	 16
566	 14	100.3	17.1	 16
567	 14	573.3	43.4	 16
568	 14	114.8	11.8	 16
569	 14	108.3	17.5	 16
570	 14	64.0	11.6	 16
571	 14	58.0	9.5	 16
572	 14	70.3	9.7	 16
573	 14	97.3	20.6	 16
574	 14	111.0	16.9	 16
575	 14	174.0	20.8	 16
576	 14	85.0	19.5	 16
577	 14	70.3	11.7	 16
578	 14	427.8	71.1	 16
579	 14	549.0	63.9	 16
580	 14	119.3	23.8	 16
581	 14	71.5	10.2	 16
582	 14	159.0	24.1	 20
583	 14	74.0	9.3	 16
584	 14	177.5	27.3	 16
585	 14	89.3	14.3	 16
586	 14	96.5	15.1	 16
587	 14	110.0	18.8	 16
588	 14	72.5	15.0	 16
589	 14	59.0	10.5	 16
590	 14	68.3	12.1	 16
591	 14	94.3	20.1	 16
592	 14	298.0	29.7	 16
593	 14	98.0	19.4	 16
594	 14	136.5	16.3	 16
595	 14	90.5	17.5	 16
596	 14	68.5	10.6	 16
597	 14	303.0	51.7	 16
598	 14	71.0	13.0	 16
599	 14	85.5	16.9	 16
600	 14	76.3	16.2	 16
601	 14	120.8	20.6	 16
602	 14	151.3	24.1	 16
603	 14	63.3	10.9	 16
604	 14	135.3	19.5	 16
605	 14	82.3	13.5	 16
606	 14	74.5	15.9	 16
607	 14	67.3	8.9	 16
608	 14	86.0	11.0	 16
609	 14	68.8	9.7	 16
610	 14	56.3	10.5	 16
611	 14	51.0	6.1	 16
612	 14	83.5	16.6	 16
613	 14	91.8	16.1	 16
614	 14	81.5	13.5	 16
615	 14	114.3	25.8	 16
616	 14	151.0	20.8	 16
617	 14	131.0	18.4	 16
618	 14	117.0	19.7	 16
619	 14	140.3	24.2	 16
620	 14	63.3	10.9	 16
621	 14	70.8	12.7	 16
622	 14	91.0	15.5	 16
623	 14	92.0	13.1	 16
624	 14	69.5	7.8	 16
625	 14	60.3	9.3	 16
626	 14	80.5	15.1	 16
627	 14	65.5	14.4	 16
628	 14	64.3	13.0	 16
629	 14	85.3	12.1	 16
630	 14	598.8	76.5	 16
631	 14	363.8	51.5	 16
632	 14	86.8	14.9	 16
633	 14	272.5	32.3	 16
634	 14	623.8	32.9	 16
635	 14	116.3	17.5	 16
636	 14	117.3	20.2	 16
637	 14	77.0	15.6	 16
638	 14	130.3	22.9	 16
639	 14	91.5	9.8	 16
640	 14	77.0	9.6	 16
641	 14	104.8	28.2	 16
642	 14	119.5	15.9	 16
643	 14	101.8	16.5	 16
644	 14	99.8	18.6	 16
645	 14	111.8	20.0	 16
646	 14	75.0	14.5	 16
647	 14	83.8	13.0	 16
648	 14	64.8	13.8	 16
649	 14	75.5	15.5	 16
650	 14	60.5	13.1	 16
651	 14	80.3	15.5	 16
652	 14	117.0	33.5	 16
653	 14	78.3	13.9	 16
654	 14	74.0	15.9	 16
655	 14	57.5	10.2	 16
656	 14	56.3	11.9	 16
657	 14	69.0	10.8	 16
658	 14	201.8	24.0	 16
659	 14	163.3	24.5	 16
660	 14	1237.3	122.6	 16
661	 14	347.0	34.4	 16
662	 14	160.3	17.6	 16
663	 14	143.3	22.2	 16
664	 14	252.3	36.4	 16
665	 14	92.8	14.4	 16
666	 14	405.8	38.5	 16
667	 14	74.3	24.2	 16
668	 14	137.3	27.7	 16
669	 14	55.0	8.8	 16
670	 14	93.3	14.9	 16
671	 14	65.5	14.4	 16
672	 14	70.3	11.2	 16
673	 14	78.8	12.6	 16
674	 14	65.3	13.0	 16
675	 14	74.3	12.5	 16
676	 14	67.0	13.4	 16
677	 14	88.3	11.3	 16
678	 14	83.8	12.8	 16
679	 14	86.3	14.4	 16
680	 14	415.8	79.1	 16
681	 14	68.0	14.1	 16
682	 14	88.8	16.5	 16
683	 14	98.5	16.6	 16
684	 14	92.5	17.2	 16
685	 14	80.5	12.7	 16
686	 14	68.3	13.6	 16
687	 14	77.8	13.4	 16
688	 14	92.0	13.0	 16
689	 14	176.3	33.5	 16
690	 14	110.5	20.6	 16
691	 14	184.0	26.9	 16
692	 14	136.5	22.4	 16
693	 14	200.3	23.4	 16
694	 14	64.8	10.4	 16
695	 14	65.0	8.0	 16
696	 14	60.5	12.1	 16
697	 14	140.0	44.4	 16
698	 14	522.8	107.7	 16
699	 14	490.5	58.9	 16
700	 14	111.8	13.6	 20
701	 14	122.8	17.0	 16
702	 14	557.5	81.6	 16
703	 14	102.8	16.6	 16
704	 14	176.3	21.1	 16
705	 14	175.8	22.9	 16
706	 14	128.5	24.1	 16
707	 14	505.8	91.3	 16
708	 14	93.8	25.5	 16
709	 14	79.0	14.8	 16
710	 14	217.0	21.9	 16
711	 14	8397.0	1366.7	 16
  0	 15	97.3	12.7	 16
  1	 15	87.5	16.7	 16
  2	 15	92.5	18.9	 16
  3	 15	105.0	35.3	 16
  4	 15	156.5	25.6	 16
  5	 15	72.8	11.4	 16
  6	 15	113.5	15.4	 16
  7	 15	375.5	101.8	 16
  8	 15	92.3	14.4	 16
  9	 15	126.3	16.6	 16
 10	 15	93.8	24.0	 16
 11	 15	107.5	123.0	 16
 12	 15	727.8	142.2	 16
 13	 15	90.8	10.6	 16
 14	 15	85.0	14.6	 16
 15	 15	109.0	18.4	 16
 16	 15	250.3	35.4	 16
 17	 15	207.5	25.6	 16
 18	 15	302.3	41.9	 16
 19	 15	344.0	63.3	 16
 20	 15	192.8	34.6	 16
 21	 15	79.3	15.3	 16
 22	 15	85.0	13.7	 16
 23	 15	157.5	59.0	 16
 24	 15	389.3	43.6	 16
 25	 15	158.0	24.9	 16
 26	 15	103.8	20.1	 16
 27	 15	69.0	14.7	 16
 28	 15	1056.5	245.6	 16
 29	 15	748.5	155.8	 16
 30	 15	125.8	25.1	 16
 31	 15	380.8	91.0	 16
 32	 15	88.3	16.3	 16
 33	 15	1076.5	283.6	 16
 34	 15	105.3	24.6	 16
 35	 15	85.3	15.5	 16
 36	 15	81.3	11.1	 16
 37	 15	202.5	33.3	 16
 38	 15	109.3	18.1	 16
 39	 15	78.8	19.8	 16
 40	 15	71.5	8.2	 16
 41	 15	309.5	61.2	 16
 42	 15	153.3	68.3	 16
 43	 15	122.5	16.7	 16
 44	 15	186.8	48.9	 16
 45	 15	132.8	25.8	 16
 46	 15	135.8	28.7	 16
 47	 15	119.5	17.5	 16
 48	 15	960.8	111.3	 16
 49	 15	342.0	47.2	 16
 50	 15	583.0	113.4	 16
 51	 15	193.5	24.9	 16
 52	 15	136.5	26.0	 16
 53	 15	163.5	26.0	 16
 54	 15	88.8	45.1	 16
 55	 15	69.3	13.0	 16
 56	 15	111.3	17.5	 16
 57	 15	116.3	22.7	 16
 58	 15	1318.5	329.7	 16
 59	 15	775.3	116.6	 16
 60	 15	94.0	11.5	 16
 61	 15	254.5	29.2	 16
 62	 15	356.3	38.1	 16
 63	 15	69.3	18.5	 16
 64	 15	210.5	25.5	 16
 65	 15	253.5	38.5	 16
 66	 15	78.5	13.2	 16
 67	 15	105.8	15.1	 16
 68	 15	453.5	83.9	 16
 69	 15	127.3	22.1	 16
 70	 15	234.5	51.5	 16
 71	 15	177.0	30.5	 16
 72	 15	127.0	20.1	 16
 73	 15	290.0	45.5	 16
 74	 15	746.5	131.2	 16
 75	 15	65.5	8.4	 16
 76	 15	1227.8	246.6	 16
 77	 15	107.0	16.5	 16
 78	 15	69.3	10.3	 16
 79	 15	247.8	52.8	 16
 80	 15	73.3	14.0	 16
 81	 15	186.3	22.0	 16
 82	 15	57.5	9.2	 16
 83	 15	67.3	9.6	 16
 84	 15	98.3	15.8	 16
 85	 15	638.3	54.7	 16
 86	 15	280.3	36.9	 16
 87	 15	153.0	37.3	 16
 88	 15	78.8	15.4	 16
 89	 15	265.8	30.0	 16
 90	 15	174.3	22.0	 16
 91	 15	235.3	34.8	 16
 92	 15	285.0	92.4	 16
 93	 15	348.0	57.0	 16
 94	 15	1387.3	206.7	 16
 95	 15	507.3	68.6	 16
 96	 15	617.5	108.2	 16
 97	 15	72.5	9.8	 16
 98	 15	133.8	24.9	 16
 99	 15	101.3	13.3	 16
100	 15	101.5	25.4	 16
101	 15	4786.3	1041.5	 16
102	 15	290.3	53.0	 16
103	 15	86.8	16.5	 16
104	 15	1929.5	469.0	 16
105	 15	284.5	64.8	 16
106	 15	112.3	14.5	 16
107	 15	68.0	12.3	 16
108	 15	146.0	20.1	 16
109	 15	150.8	24.0	 16
110	 15	96.3	19.6	 16
111	 15	166.0	24.7	 20
112	 15	136.3	23.7	 16
113	 15	92.5	19.9	 16
114	 15	238.5	34.9	 16
115	 15	369.0	52.5	 16
116	 15	207.0	32.7	 16
117	 15	114.3	28.3	 16
118	 15	316.5	55.9	 16
119	 15	75.3	22.4	 16
120	 15	363.3	85.5	 16
121	 15	273.0	43.0	 16
122	 15	83.3	10.2	 16
123	 15	325.5	72.9	 16
124	 15	168.8	30.3	 16
125	 15	85.3	15.5	 16
126	 15	352.0	68.4	 16
127	 15	88.0	23.3	 16
128	 15	84.5	64.1	 16
129	 15	64.8	11.0	 16
130	 15	114.0	44.1	 16
131	 15	1041.3	233.2	 16
132	 15	341.5	78.8	 16
133	 15	95.5	17.1	 16
134	 15	508.8	98.5	 16
135	 15	88.5	24.4	 16
136	 15	126.8	21.8	 16
137	 15	2887.8	521.4	 16
138	 15	1780.5	396.5	 16
139	 15	232.0	36.7	 16
140	 15	167.3	45.8	 16
141	 15	94.3	18.2	 16
142	 15	88.0	15.4	 16
143	 15	131.5	15.6	 16
144	 15	459.5	50.2	 16
145	 15	364.8	42.8	 16
146	 15	186.3	34.0	 16
147	 15	76.0	15.0	 16
148	 15	448.3	54.5	 16
149	 15	130.8	27.8	 16
150	 15	175.8	24.9	 16
151	 15	268.3	43.6	 16
152	 15	321.0	77.1	 16
153	 15	280.5	62.4	 16
154	 15	157.8	26.9	 16
155	 15	63.0	7.8	 16
156	 15	94.8	14.5	 16
157	 15	205.5	37.2	 16
158	 15	140.8	20.7	 16
159	 15	295.3	40.3	 16
160	 15	472.3	74.5	 16
161	 15	2670.0	298.2	 16
162	 15	113.8	18.2	 16
163	 15	138.5	14.4	 16
164	 15	63.5	16.2	 16
165	 15	82.5	13.5	 16
166	 15	103.0	17.5	 16
167	 15	321.8	59.7	 16
168	 15	145.5	24.5	 16
169	 15	150.0	26.8	 16
170	 15	106.5	67.3	 16
171	 15	82.8	11.6	 16
172	 15	82.5	13.7	 16
173	 15	88.3	11.3	 16
174	 15	70.0	26.7	 16
175	 15	86.5	17.8	 16
176	 15	83.0	46.6	 16
177	 15	132.8	15.7	 16
178	 15	471.5	41.9	 16
179	 15	122.8	19.0	 16
180	 15	121.0	26.8	 16
181	 15	94.0	14.6	 16
182	 15	448.8	45.7	 16
183	 15	138.5	98.4	 16
184	 15	100.0	13.8	 16
185	 15	92.3	14.8	 16
186	 15	117.0	18.8	 16
187	 15	64.0	8.2	 16
188	 15	495.0	77.7	 16
189	 15	378.3	50.5	 16
190	 15	416.8	42.5	 16
191	 15	85.0	22.4	 16
192	 15	160.3	24.3	 16
193	 15	119.8	21.4	 16
194	 15	241.0	41.4	 16
195	 15	157.3	20.9	 16
196	 15	106.3	18.3	 16
197	 15	518.5	81.4	 16
198	 15	67.5	15.0	 16
199	 15	59.5	8.9	 16
200	 15	67.0	12.5	 16
201	 15	569.3	103.8	 16
202	 15	155.0	15.2	 16
203	 15	272.8	37.2	 16
204	 15	74.3	12.1	 16
205	 15	292.5	26.8	 16
206	 15	452.5	60.2	 16
207	 15	110.0	19.3	 16
208	 15	155.3	17.0	 16
209	 15	179.5	16.4	 16
210	 15	122.3	18.4	 16
211	 15	141.0	29.1	 16
212	 15	118.5	18.1	 16
213	 15	68.3	12.3	 16
214	 15	176.8	31.4	 16
215	 15	89.8	12.5	 16
216	 15	2041.5	269.6	 16
217	 15	134.0	20.2	 16
218	 15	2583.8	477.9	 16
219	 15	438.5	78.3	 16
220	 15	149.5	24.8	 16
221	 15	232.8	35.7	 16
222	 15	130.5	12.7	 16
223	 15	130.8	18.0	 16
224	 15	81.0	14.1	 16
225	 15	126.3	19.1	 16
226	 15	240.0	41.2	 16
227	 15	61.5	14.1	 16
228	 15	90.3	14.3	 16
229	 15	527.0	125.6	 20
230	 15	191.8	115.2	 16
231	 15	77.0	11.5	 16
232	 15	176.0	35.0	 16
233	 15	68.3	18.2	 16
234	 15	145.3	19.1	 16
235	 15	542.8	67.8	 16
236	 15	1007.8	116.5	 16
237	 15	490.0	81.7	 16
238	 15	1202.0	249.3	 16
239	 15	114.3	31.0	 16
240	 15	120.3	17.6	 16
241	 15	513.8	122.8	 16
242	 15	1131.0	252.7	 16
243	 15	106.3	20.8	 16
244	 15	105.3	24.9	 16
245	 15	187.0	35.0	 16
246	 15	252.3	57.7	 16
247	 15	67.3	8.6	 16
248	 15	422.3	118.9	 16
249	 15	1376.8	244.4	 16
250	 15	78.0	11.9	 16
251	 15	85.3	21.1	 16
252	 15	274.5	51.3	 16
253	 15	175.8	34.8	 16
254	 15	1490.8	205.7	 16
255	 15	164.3	21.6	 16
256	 15	182.5	31.2	 16
257	 15	488.0	78.5	 16
258	 15	77.8	16.5	 16
259	 15	62.5	15.0	 16
260	 15	160.5	45.5	 16
261	 15	99.3	12.5	 16
262	 15	152.5	19.6	 16
263	 15	157.3	17.8	 16
264	 15	268.3	52.9	 16
265	 15	122.8	30.8	 16
266	 15	78.5	9.2	 16
267	 15	137.5	24.2	 16
268	 15	146.5	30.6	 16
269	 15	281.8	62.5	 16
270	 15	107.8	18.1	 16
271	 15	84.0	13.9	 16
272	 15	247.8	68.5	 16
273	 15	75.3	11.7	 16
274	 15	323.0	30.1	 16
275	 15	264.5	45.8	 16
276	 15	210.8	23.9	 16
277	 15	89.5	12.9	 16
278	 15	69.0	15.3	 16
279	 15	336.5	66.3	 16
280	 15	360.0	42.2	 16
281	 15	102.0	19.7	 16
282	 15	460.5	81.1	 16
283	 15	81.3	14.3	 16
284	 15	70.0	13.3	 16
285	 15	123.8	20.9	 16
286	 15	122.3	15.9	 16
287	 15	272.8	32.8	 16
288	 15	1657.0	286.0	 16
289	 15	94.0	14.4	 16
290	 15	211.5	48.1	 16
291	 15	192.5	212.6	 16
292	 15	2346.8	498.0	 16
293	 15	599.5	97.9	 16
294	 15	108.5	20.6	 16
295	 15	76.3	12.0	 16
296	 15	317.0	59.0	 16
297	 15	1294.0	169.5	 16
298	 15	144.5	13.2	 16
299	 15	115.3	17.4	 16
300	 15	69.3	13.3	 16
301	 15	144.0	17.0	 16
302	 15	92.3	15.2	 16
303	 15	70.5	8.4	 16
304	 15	569.3	104.8	 16
305	 15	82.5	15.3	 16
306	 15	316.5	43.5	 16
307	 15	271.3	44.1	 16
308	 15	325.0	43.4	 16
309	 15	139.8	20.2	 16
310	 15	328.5	42.8	 16
311	 15	265.5	26.6	 16
312	 15	133.3	20.7	 16
313	 15	98.5	14.7	 16
314	 15	160.3	26.9	 16
315	 15	218.8	39.7	 16
316	 15	745.0	121.8	 16
317	 15	218.3	29.4	 16
318	 15	96.0	14.7	 16
319	 15	239.3	40.1	 16
320	 15	118.5	24.0	 16
321	 15	160.5	20.4	 16
322	 15	275.5	38.1	 16
323	 15	133.8	17.8	 16
324	 15	918.0	90.2	 16
325	 15	109.5	24.8	 16
326	 15	131.3	10.7	 16
327	 15	164.3	20.7	 16
328	 15	64.3	8.4	 16
329	 15	75.0	15.7	 16
330	 15	1254.5	118.4	 16
331	 15	362.8	56.6	 16
332	 15	406.3	48.1	 16
333	 15	522.3	73.5	 16
334	 15	89.8	13.6	 16
335	 15	65.0	12.3	 16
336	 15	81.0	16.5	 16
337	 15	400.3	40.9	 16
338	 15	499.8	60.8	 16
339	 15	484.5	84.1	 16
340	 15	186.0	27.3	 16
341	 15	152.3	26.3	 16
342	 15	74.0	10.2	 16
343	 15	75.0	14.2	 16
344	 15	157.5	24.2	 16
345	 15	104.5	16.5	 16
346	 15	295.8	35.9	 16
347	 15	64.5	11.9	 16
348	 15	675.8	139.8	 20
349	 15	79.8	13.0	 16
350	 15	135.0	24.0	 16
351	 15	117.5	18.6	 16
352	 15	84.8	14.3	 16
353	 15	230.3	32.9	 16
354	 15	71.8	17.5	 16
355	 15	261.0	29.1	 16
356	 15	698.3	77.3	 16
357	 15	298.0	23.9	 16
358	 15	271.0	36.0	 16
359	 15	601.3	117.2	 16
360	 15	57.3	8.2	 16
361	 15	121.3	21.1	 16
362	 15	402.3	76.0	 16
363	 15	72.3	9.4	 16
364	 15	218.5	34.4	 16
365	 15	84.0	14.9	 16
366	 15	140.8	22.9	 16
367	 15	225.8	34.3	 16
368	 15	95.0	13.6	 16
369	 15	66.3	12.5	 16
370	 15	85.3	18.5	 16
371	 15	81.3	14.1	 16
372	 15	141.5	18.9	 16
373	 15	512.5	51.5	 16
374	 15	89.3	14.2	 16
375	 15	246.5	32.7	 16
376	 15	288.3	39.7	 16
377	 15	101.8	14.5	 16
378	 15	86.0	13.3	 16
379	 15	186.3	26.0	 16
380	 15	74.5	11.3	 16
381	 15	76.0	18.2	 16
382	 15	59.0	10.0	 16
383	 15	134.3	24.7	 16
384	 15	83.3	9.9	 16
385	 15	672.5	135.0	 16
386	 15	114.3	22.7	 16
387	 15	666.0	116.8	 16
388	 15	274.5	40.9	 16
389	 15	180.8	25.0	 16
390	 15	63.5	14.0	 16
391	 15	81.3	14.6	 16
392	 15	107.3	17.9	 16
393	 15	783.3	145.4	 16
394	 15	536.3	59.1	 16
395	 15	146.3	23.3	 16
396	 15	81.0	11.3	 16
397	 15	115.3	17.3	 16
398	 15	83.3	13.0	 16
399	 15	98.0	13.8	 16
400	 15	195.5	23.7	 16
401	 15	125.3	24.3	 16
402	 15	188.0	291.9	 16
403	 15	118.0	17.9	 16
404	 15	2518.0	418.5	 16
405	 15	232.0	21.7	 16
406	 15	134.3	108.4	 16
407	 15	1615.3	332.2	 16
408	 15	264.3	45.1	 16
409	 15	93.3	13.4	 16
410	 15	168.8	24.1	 16
411	 15	307.5	72.4	 16
412	 15	67.5	8.0	 16
413	 15	411.5	81.1	 16
414	 15	87.3	19.5	 16
415	 15	229.0	24.8	 16
416	 15	201.5	46.6	 16
417	 15	990.8	100.9	 16
418	 15	292.0	39.7	 16
419	 15	249.0	44.2	 16
420	 15	68.3	10.3	 16
421	 15	90.0	14.4	 16
422	 15	89.3	11.8	 16
423	 15	300.5	32.0	 16
424	 15	180.0	27.2	 16
425	 15	71.5	12.7	 16
426	 15	64.3	11.6	 16
427	 15	186.0	36.3	 16
428	 15	59.5	10.6	 16
429	 15	72.0	12.0	 16
430	 15	83.0	17.3	 16
431	 15	8498.3	1887.2	 16
432	 15	104.0	21.7	 16
433	 15	111.5	23.7	 16
434	 15	1266.8	282.9	 16
435	 15	494.5	89.2	 16
436	 15	139.5	25.9	 16
437	 15	320.3	40.7	 16
438	 15	219.5	32.8	 16
439	 15	152.5	41.1	 16
440	 15	8523.5	868.8	 16
441	 15	303.5	33.1	 16
442	 15	70.5	15.7	 16
443	 15	177.0	24.5	 16
444	 15	426.5	53.1	 16
445	 15	435.5	35.1	 16
446	 15	333.8	48.1	 16
447	 15	391.8	45.9	 16
448	 15	347.3	39.1	 16
449	 15	411.0	59.9	 16
450	 15	370.3	56.5	 16
451	 15	1316.3	258.9	 16
452	 15	87.5	15.1	 16
453	 15	355.3	56.3	 16
454	 15	701.5	123.5	 16
455	 15	75.3	8.7	 16
456	 15	65.0	14.9	 16
457	 15	301.0	98.3	 16
458	 15	727.3	115.5	 16
459	 15	140.0	21.6	 16
460	 15	91.0	66.4	 16
461	 15	107.0	14.6	 16
462	 15	97.3	70.0	 16
463	 15	66.0	16.0	 16
464	 15	144.0	18.7	 16
465	 15	67.3	12.2	 16
466	 15	102.5	22.1	 20
467	 15	300.3	49.2	 16
468	 15	270.3	41.0	 16
469	 15	727.8	142.8	 16
470	 15	106.3	20.1	 16
471	 15	299.3	55.5	 16
472	 15	96.5	17.2	 16
473	 15	147.5	27.6	 16
474	 15	150.5	26.9	 16
475	 15	126.5	17.5	 16
476	 15	78.0	16.3	 16
477	 15	173.3	18.1	 16
478	 15	808.8	166.1	 16
479	 15	133.3	15.8	 16
480	 15	77.8	14.3	 16
481	 15	427.5	106.5	 16
482	 15	76.3	15.1	 16
483	 15	70.3	12.7	 16
484	 15	75.3	9.6	 16
485	 15	56.0	14.7	 16
486	 15	180.3	43.1	 16
487	 15	92.5	15.9	 16
488	 15	119.0	20.8	 16
489	 15	104.3	17.0	 16
490	 15	90.3	14.8	 16
491	 15	64.8	12.3	 16
492	 15	583.3	125.4	 16
493	 15	142.0	24.1	 16
494	 15	66.0	7.7	 16
495	 15	76.5	18.1	 16
496	 15	468.0	108.3	 16
497	 15	64.3	14.5	 16
498	 15	56.0	8.7	 16
499	 15	81.8	17.3	 16
500	 15	66.0	11.0	 16
501	 15	110.8	67.6	 16
502	 15	105.0	19.3	 16
503	 15	614.8	153.6	 16
504	 15	128.5	24.2	 16
505	 15	499.3	110.3	 16
506	 15	95.0	16.2	 16
507	 15	836.5	199.1	 16
508	 15	179.0	22.3	 16
509	 15	85.8	12.1	 16
510	 15	91.5	19.4	 16
511	 15	173.0	26.5	 16
512	 15	62.0	9.1	 16
513	 15	96.5	18.9	 16
514	 15	75.8	16.1	 16
515	 15	121.0	17.6	 16
516	 15	125.8	14.2	 16
517	 15	229.8	35.9	 16
518	 15	106.0	11.8	 16
519	 15	96.5	15.9	 16
520	 15	65.8	9.1	 16
521	 15	66.3	10.6	 16
522	 15	132.5	23.1	 16
523	 15	470.5	78.9	 16
524	 15	56.3	9.6	 16
525	 15	402.5	73.6	 16
526	 15	194.5	34.6	 16
527	 15	116.0	35.2	 16
528	 15	186.3	26.2	 16
529	 15	113.3	44.2	 16
530	 15	221.3	53.8	 16
531	 15	176.0	34.0	 16
532	 15	79.0	38.2	 16
533	 15	67.3	12.2	 16
534	 15	67.5	15.9	 16
535	 15	591.0	65.7	 16
536	 15	167.5	24.9	 16
537	 15	273.8	19.7	 16
538	 15	233.5	19.4	 16
539	 15	103.5	11.0	 16
540	 15	1929.8	205.9	 16
541	 15	70.8	13.6	 16
542	 15	92.3	13.1	 16
543	 15	108.3	22.6	 16
544	 15	840.8	144.8	 16
545	 15	328.5	54.6	 16
546	 15	74.0	11.8	 16
547	 15	565.3	81.0	 16
548	 15	163.8	21.8	 16
549	 15	68.3	13.3	 16
550	 15	67.0	10.5	 16
551	 15	76.8	11.2	 16
552	 15	223.5	37.7	 16
553	 15	565.0	137.4	 16
554	 15	136.8	24.5	 16
555	 15	93.3	17.0	 16
556	 15	1028.0	167.1	 16
557	 15	430.5	48.2	 16
558	 15	83.8	12.9	 16
559	 15	343.8	53.9	 16
560	 15	56.0	7.6	 16
561	 15	252.0	48.1	 16
562	 15	121.8	19.0	 16
563	 15	198.0	30.3	 16
564	 15	95.5	21.1	 16
565	 15	105.3	14.1	 16
566	 15	426.5	94.9	 16
567	 15	190.5	32.8	 16
568	 15	162.0	24.4	 16
569	 15	181.3	20.7	 16
570	 15	368.3	57.6	 16
571	 15	130.3	25.8	 16
572	 15	146.5	17.9	 16
573	 15	1457.0	345.3	 16
574	 15	76.5	12.6	 16
575	 15	57.8	8.5	 16
576	 15	398.0	91.4	 16
577	 15	475.3	94.6	 16
578	 15	101.0	24.5	 16
579	 15	107.3	15.2	 16
580	 15	289.0	56.9	 16
581	 15	93.3	14.6	 16
582	 15	101.3	19.7	 16
583	 15	128.3	27.7	 16
584	 15	108.3	19.7	 16
585	 15	141.0	18.9	 20
586	 15	921.8	135.7	 16
587	 15	142.0	29.8	 16
588	 15	155.8	29.9	 16
589	 15	64.8	13.2	 16
590	 15	78.8	54.2	 16
591	 15	109.0	17.3	 16
592	 15	382.3	56.9	 16
593	 15	192.0	26.4	 16
594	 15	84.0	20.0	 16
595	 15	198.8	27.8	 16
596	 15	194.8	41.9	 16
597	 15	133.8	20.2	 16
598	 15	103.0	24.2	 16
599	 15	198.5	39.9	 16
600	 15	566.3	120.4	 16
601	 15	233.5	41.7	 16
602	 15	233.8	28.5	 16
603	 15	55.8	5.1	 16
604	 15	186.5	146.7	 16
605	 15	279.3	23.4	 16
606	 15	126.5	30.9	 16
607	 15	989.5	113.6	 16
608	 15	700.3	87.7	 16
609	 15	98.3	16.0	 16
610	 15	54.8	9.0	 16
611	 15	62.3	8.7	 16
612	 15	101.3	17.9	 16
613	 15	215.0	27.7	 16
614	 15	370.3	51.5	 16
615	 15	116.5	19.7	 16
616	 15	167.3	29.5	 16
617	 15	662.0	60.0	 16
618	 15	96.8	15.7	 16
619	 15	224.0	25.9	 16
620	 15	641.0	126.9	 16
621	 15	311.5	46.3	 16
622	 15	3194.3	340.2	 16
623	 15	674.3	79.1	 16
624	 15	77.8	14.6	 16
625	 15	302.0	33.4	 16
626	 15	78.3	10.7	 16
627	 15	114.5	14.7	 16
628	 15	150.5	22.1	 16
629	 15	143.5	26.5	 16
630	 15	257.8	27.3	 16
631	 15	155.5	80.6	 16
632	 15	187.5	18.5	 16
633	 15	451.0	46.3	 16
634	 15	446.3	45.7	 16
635	 15	233.5	45.7	 16
636	 15	257.5	31.4	 16
637	 15	178.8	24.4	 16
638	 15	566.3	40.2	 16
639	 15	137.0	18.7	 16
640	 15	214.5	30.8	 16
641	 15	197.5	24.6	 16
642	 15	103.0	16.1	 16
643	 15	401.3	58.6	 16
644	 15	148.0	21.9	 16
645	 15	120.5	14.4	 16
646	 15	214.3	30.1	 16
647	 15	101.3	14.7	 16
648	 15	384.5	52.9	 16
649	 15	237.8	39.6	 16
650	 15	57.0	9.7	 16
651	 15	69.0	13.2	 16
652	 15	83.0	17.0	 16
653	 15	170.8	23.5	 16
654	 15	76.5	11.5	 16
655	 15	101.0	83.7	 16
656	 15	3800.0	231.9	 16
657	 15	86.5	16.9	 16
658	 15	91.5	16.4	 16
659	 15	97.0	14.0	 16
660	 15	447.0	35.9	 16
661	 15	103.3	30.3	 16
662	 15	4964.0	522.2	 16
663	 15	93.0	12.5	 16
664	 15	111.0	15.4	 16
665	 15	291.0	33.6	 16
666	 15	69.0	17.0	 16
667	 15	70.8	18.8	 16
668	 15	97.3	18.9	 16
669	 15	81.0	13.2	 16
670	 15	120.3	18.9	 16
671	 15	489.5	79.2	 16
672	 15	112.8	20.2	 16
673	 15	251.3	44.7	 16
674	 15	123.0	16.2	 16
675	 15	3869.0	628.6	 16
676	 15	287.3	32.1	 16
677	 15	98.3	12.1	 16
678	 15	275.8	43.3	 16
679	 15	92.0	14.7	 16
680	 15	74.0	17.7	 16
681	 15	64.3	6.7	 16
682	 15	74.0	15.1	 16
683	 15	224.8	32.8	 16
684	 15	187.3	27.5	 16
685	 15	186.3	32.3	 16
686	 15	1176.8	156.3	 16
687	 15	104.0	16.3	 16
688	 15	324.5	63.3	 16
689	 15	70.8	14.8	 16
690	 15	447.8	68.8	 16
691	 15	104.3	15.0	 16
692	 15	6325.5	1092.5	 16
693	 15	75.3	13.9	 16
694	 15	200.3	33.8	 16
695	 15	73.8	11.8	 16
696	 15	80.8	12.2	 16
697	 15	153.0	20.5	 16
698	 15	143.3	25.9	 16
699	 15	98.3	18.6	 16
700	 15	79.8	11.7	 16
701	 15	204.3	40.6	 16
702	 15	263.5	40.1	 16
703	 15	82.0	15.4	 16
704	 15	291.8	27.6	 20
705	 15	330.5	34.8	 16
706	 15	110.8	14.9	 16
707	 15	129.3	15.5	 16
708	 15	824.5	152.4	 16
709	 15	73.0	14.2	 16
710	 15	4695.8	833.4	 16
711	 15	90.5	14.5	 16
  0	 16	4109.5	642.7	 16
  1	 16	86.8	15.6	 16
  2	 16	69.5	14.0	 16
  3	 16	74.0	11.2	 16
  4	 16	86.5	12.1	 16
  5	 16	99.5	12.3	 16
  6	 16	112.8	16.0	 16
  7	 16	92.3	22.9	 16
  8	 16	71.3	10.5	 16
  9	 16	89.0	14.5	 16
 10	 16	59.0	10.2	 16
 11	 16	65.3	9.0	 16
 12	 16	170.5	28.9	 16
 13	 16	86.0	16.9	 16
 14	 16	79.5	17.2	 16
 15	 16	78.0	10.6	 16
 16	 16	210.3	27.6	 16
 17	 16	195.0	34.6	 16
 18	 16	102.3	18.6	 16
 19	 16	138.5	22.0	 16
 20	 16	120.5	18.1	 16
 21	 16	68.3	11.2	 16
 22	 16	80.3	17.8	 16
 23	 16	75.3	9.8	 16
 24	 16	160.3	21.7	 16
 25	 16	86.8	14.5	 16
 26	 16	80.3	14.1	 16
 27	 16	72.5	12.9	 16
 28	 16	164.5	33.0	 16
 29	 16	167.8	20.6	 16
 30	 16	89.3	12.7	 16
 31	 16	160.0	26.2	 16
 32	 16	77.3	12.1	 16
 33	 16	129.0	27.5	 16
 34	 16	79.8	17.2	 16
 35	 16	122.0	18.0	 16
 36	 16	81.0	13.7	 16
 37	 16	78.5	15.1	 16
 38	 16	61.5	9.5	 16
 39	 16	72.3	14.7	 16
 40	 16	62.3	11.4	 16
 41	 16	94.3	19.1	 16
 42	 16	91.3	10.1	 16
 43	 16	105.0	15.0	 16
 44	 16	166.5	26.4	 16
 45	 16	131.8	23.1	 16
 46	 16	73.5	8.5	 16
 47	 16	135.5	20.1	 16
 48	 16	666.5	101.7	 16
 49	 16	133.3	26.1	 16
 50	 16	125.0	20.0	 16
 51	 16	239.0	31.0	 16
 52	 16	170.5	31.4	 16
 53	 16	98.5	22.8	 16
 54	 16	80.3	17.1	 16
 55	 16	67.8	11.4	 16
 56	 16	116.8	11.3	 16
 57	 16	106.5	27.8	 16
 58	 16	453.8	67.9	 16
 59	 16	135.0	27.8	 16
 60	 16	76.0	8.2	 16
 61	 16	91.0	12.4	 16
 62	 16	122.8	15.5	 16
 63	 16	61.3	14.8	 16
 64	 16	242.5	35.3	 16
 65	 16	102.3	13.0	 16
 66	 16	76.0	26.9	 16
 67	 16	142.5	15.6	 16
 68	 16	187.0	27.9	 16
 69	 16	212.3	26.4	 16
 70	 16	258.5	31.7	 16
 71	 16	139.3	25.3	 16
 72	 16	569.5	42.1	 16
 73	 16	323.3	36.3	 16
 74	 16	1621.5	132.2	 16
 75	 16	66.0	7.3	 16
 76	 16	488.5	65.1	 16
 77	 16	132.3	25.9	 16
 78	 16	74.8	16.1	 16
 79	 16	74.5	15.0	 16
 80	 16	68.8	14.8	 16
 81	 16	172.3	32.0	 16
 82	 16	51.5	8.6	 16
 83	 16	75.5	9.0	 16
 84	 16	70.5	12.8	 16
 85	 16	90.0	13.7	 16
 86	 16	82.5	20.1	 16
 87	 16	67.8	16.4	 16
 88	 16	107.0	18.9	 16
 89	 16	80.3	11.9	 16
 90	 16	120.3	19.3	 16
 91	 16	113.3	13.4	 16
 92	 16	118.0	14.6	 16
 93	 16	81.8	15.8	 16
 94	 16	125.8	27.3	 16
 95	 16	160.0	19.5	 16
 96	 16	207.5	48.1	 16
 97	 16	73.5	12.5	 16
 98	 16	97.3	12.7	 16
 99	 16	74.8	12.6	 16
100	 16	71.0	12.5	 16
101	 16	897.5	135.3	 16
102	 16	85.3	17.4	 16
103	 16	68.3	11.8	 16
104	 16	227.5	48.4	 16
105	 16	230.5	23.8	 16
106	 16	90.0	16.6	 16
107	 16	60.5	9.0	 16
108	 16	143.0	59.3	 16
109	 16	80.8	13.4	 16
110	 16	67.8	13.5	 16
111	 16	144.8	21.2	 16
112	 16	135.0	21.9	 16
113	 16	120.0	19.1	 16
114	 16	191.0	23.2	 20
115	 16	242.5	42.4	 16
116	 16	105.8	15.2	 16
117	 16	168.3	21.5	 16
118	 16	282.0	42.1	 16
119	 16	72.5	12.4	 16
120	 16	75.0	11.9	 16
121	 16	160.0	19.3	 16
122	 16	90.0	14.7	 16
123	 16	87.3	9.3	 16
124	 16	98.8	17.6	 16
125	 16	86.0	19.2	 16
126	 16	93.0	16.5	 16
127	 16	65.3	9.8	 16
128	 16	63.3	14.8	 16
129	 16	59.5	14.6	 16
130	 16	76.3	13.4	 16
131	 16	160.5	25.6	 16
132	 16	109.5	21.1	 16
133	 16	86.5	14.1	 16
134	 16	60.0	9.8	 16
135	 16	263.0	246.3	 16
136	 16	68.8	11.0	 16
137	 16	865.3	170.2	 16
138	 16	205.8	41.7	 16
139	 16	105.5	22.8	 16
140	 16	65.3	9.4	 16
141	 16	62.5	5.5	 16
142	 16	64.5	10.9	 16
143	 16	200.5	36.6	 16
144	 16	521.0	48.6	 16
145	 16	194.5	26.4	 16
146	 16	83.0	13.2	 16
147	 16	80.3	13.0	 16
148	 16	891.5	83.8	 16
149	 16	166.5	20.5	 16
150	 16	141.3	22.2	 16
151	 16	158.0	28.8	 16
152	 16	72.3	12.1	 16
153	 16	81.0	9.4	 16
154	 16	93.8	20.0	 16
155	 16	68.5	16.3	 16
156	 16	67.3	10.5	 16
157	 16	162.8	23.3	 16
158	 16	168.3	24.6	 16
159	 16	229.8	31.4	 16
160	 16	823.5	101.1	 16
161	 16	631.5	56.3	 16
162	 16	82.3	12.6	 16
163	 16	111.3	19.5	 16
164	 16	73.5	14.8	 16
165	 16	70.3	15.7	 16
166	 16	80.0	13.1	 16
167	 16	89.0	10.3	 16
168	 16	92.5	13.2	 16
169	 16	94.3	20.1	 16
170	 16	69.3	15.4	 16
171	 16	60.5	10.7	 16
172	 16	95.0	18.1	 16
173	 16	82.0	11.0	 16
174	 16	65.5	11.7	 16
175	 16	69.3	14.6	 16
176	 16	59.3	10.6	 16
177	 16	166.0	28.4	 16
178	 16	2704.8	271.5	 16
179	 16	134.3	27.4	 16
180	 16	101.5	16.6	 16
181	 16	204.8	35.1	 16
182	 16	222.5	28.9	 16
183	 16	184.0	19.8	 16
184	 16	164.5	27.2	 16
185	 16	76.5	11.8	 16
186	 16	78.3	14.7	 16
187	 16	78.3	15.6	 16
188	 16	169.3	26.7	 16
189	 16	202.0	22.2	 16
190	 16	206.8	17.4	 16
191	 16	79.3	15.3	 16
192	 16	111.8	17.6	 16
193	 16	93.8	16.7	 16
194	 16	182.0	18.6	 16
195	 16	115.5	16.6	 16
196	 16	75.5	11.0	 16
197	 16	105.5	12.7	 16
198	 16	72.0	12.3	 16
199	 16	70.5	14.1	 16
200	 16	60.3	9.7	 16
201	 16	132.5	28.5	 16
202	 16	214.5	21.1	 16
203	 16	110.0	20.5	 16
204	 16	90.0	11.2	 16
205	 16	179.0	26.9	 16
206	 16	135.8	17.0	 16
207	 16	86.0	15.5	 16
208	 16	113.0	17.4	 16
209	 16	135.3	20.6	 16
210	 16	83.3	12.6	 16
211	 16	72.8	15.1	 16
212	 16	68.3	10.6	 16
213	 16	65.3	10.1	 16
214	 16	77.3	11.6	 16
215	 16	70.8	14.5	 16
216	 16	357.3	53.6	 16
217	 16	140.5	19.4	 16
218	 16	447.5	73.7	 16
219	 16	170.8	23.2	 16
220	 16	97.8	20.9	 16
221	 16	93.3	18.6	 16
222	 16	167.3	19.3	 16
223	 16	77.5	12.9	 16
224	 16	61.8	12.0	 16
225	 16	79.5	13.6	 16
226	 16	85.3	12.4	 16
227	 16	77.3	11.9	 16
228	 16	65.8	12.1	 16
229	 16	605.8	68.5	 16
230	 16	95.0	22.5	 16
231	 16	72.3	9.9	 16
232	 16	74.5	35.9	 20
233	 16	63.5	12.2	 16
234	 16	242.3	46.2	 16
235	 16	460.0	55.5	 16
236	 16	663.0	89.5	 16
237	 16	214.8	31.2	 16
238	 16	146.5	29.9	 16
239	 16	149.8	24.0	 16
240	 16	86.3	15.4	 16
241	 16	103.0	19.6	 16
242	 16	161.5	37.2	 16
243	 16	95.3	20.2	 16
244	 16	81.8	14.1	 16
245	 16	120.5	18.4	 16
246	 16	95.0	18.5	 16
247	 16	77.3	11.7	 16
248	 16	80.3	24.8	 16
249	 16	412.0	76.8	 16
250	 16	75.8	11.2	 16
251	 16	78.3	13.3	 16
252	 16	70.8	17.0	 16
253	 16	156.8	42.5	 16
254	 16	1478.0	151.4	 16
255	 16	224.5	42.7	 16
256	 16	135.3	22.8	 16
257	 16	196.8	32.8	 16
258	 16	78.5	15.6	 16
259	 16	69.0	19.1	 16
260	 16	85.3	16.4	 16
261	 16	82.8	20.6	 16
262	 16	114.3	20.2	 16
263	 16	89.0	10.0	 16
264	 16	167.5	30.4	 16
265	 16	99.8	21.9	 16
266	 16	70.0	13.2	 16
267	 16	113.3	17.7	 16
268	 16	140.5	19.7	 16
269	 16	113.0	27.2	 16
270	 16	65.5	24.2	 16
271	 16	68.0	9.9	 16
272	 16	117.3	25.4	 16
273	 16	85.0	13.7	 16
274	 16	190.3	23.1	 16
275	 16	180.5	22.4	 16
276	 16	150.3	16.0	 16
277	 16	69.5	11.6	 16
278	 16	90.0	24.9	 16
279	 16	86.5	15.6	 16
280	 16	272.0	45.5	 16
281	 16	119.0	18.4	 16
282	 16	147.3	27.5	 16
283	 16	75.3	12.0	 16
284	 16	73.3	18.2	 16
285	 16	89.3	12.4	 16
286	 16	107.0	21.3	 16
287	 16	155.8	22.8	 16
288	 16	529.3	37.0	 16
289	 16	98.0	15.3	 16
290	 16	97.8	15.0	 16
291	 16	87.5	17.3	 16
292	 16	1496.8	188.7	 16
293	 16	224.5	40.3	 16
294	 16	91.3	16.4	 16
295	 16	81.0	13.0	 16
296	 16	112.5	12.9	 16
297	 16	422.5	71.4	 16
298	 16	101.8	16.6	 16
299	 16	88.0	11.4	 16
300	 16	65.5	12.3	 16
301	 16	108.0	22.4	 16
302	 16	61.3	11.1	 16
303	 16	75.8	12.6	 16
304	 16	104.5	17.4	 16
305	 16	64.5	11.9	 16
306	 16	122.8	12.0	 16
307	 16	124.3	19.3	 16
308	 16	134.3	19.5	 16
309	 16	127.5	20.6	 16
310	 16	680.3	72.8	 16
311	 16	229.8	30.3	 16
312	 16	135.5	17.2	 16
313	 16	64.0	10.0	 16
314	 16	69.0	12.0	 16
315	 16	106.8	15.5	 16
316	 16	663.5	51.6	 16
317	 16	228.3	31.0	 16
318	 16	112.8	20.5	 16
319	 16	215.8	24.8	 16
320	 16	144.0	21.7	 16
321	 16	187.8	25.3	 16
322	 16	185.3	14.4	 16
323	 16	82.3	12.0	 16
324	 16	133.0	21.1	 16
325	 16	263.0	40.6	 16
326	 16	139.3	18.7	 16
327	 16	126.8	20.2	 16
328	 16	69.0	11.2	 16
329	 16	68.0	10.8	 16
330	 16	240.5	47.8	 16
331	 16	97.5	14.7	 16
332	 16	191.8	26.7	 16
333	 16	381.0	48.7	 16
334	 16	78.5	11.0	 16
335	 16	65.0	10.0	 16
336	 16	65.3	14.3	 16
337	 16	335.0	36.5	 16
338	 16	151.8	25.4	 16
339	 16	129.8	28.4	 16
340	 16	85.3	17.1	 16
341	 16	68.5	12.4	 16
342	 16	79.5	13.7	 16
343	 16	68.8	13.2	 16
344	 16	80.3	18.0	 16
345	 16	56.5	10.2	 16
346	 16	140.8	20.5	 16
347	 16	60.8	12.0	 16
348	 16	102.8	22.9	 16
349	 16	79.5	8.0	 16
350	 16	88.3	13.8	 16
351	 16	105.3	12.5	 20
352	 16	62.5	10.7	 16
353	 16	96.3	19.0	 16
354	 16	80.0	10.4	 16
355	 16	93.5	21.3	 16
356	 16	402.0	62.1	 16
357	 16	170.8	40.4	 16
358	 16	149.3	29.9	 16
359	 16	174.8	27.1	 16
360	 16	68.0	10.3	 16
361	 16	97.3	23.5	 16
362	 16	119.0	20.7	 16
363	 16	67.0	11.4	 16
364	 16	94.3	18.3	 16
365	 16	86.0	14.8	 16
366	 16	134.3	18.9	 16
367	 16	152.5	37.7	 16
368	 16	66.0	13.3	 16
369	 16	69.5	13.2	 16
370	 16	69.5	11.5	 16
371	 16	73.0	14.7	 16
372	 16	131.5	27.1	 16
373	 16	136.0	19.1	 16
374	 16	72.0	16.2	 16
375	 16	325.3	39.7	 16
376	 16	133.0	20.9	 16
377	 16	89.3	14.0	 16
378	 16	87.5	16.5	 16
379	 16	145.3	23.8	 16
380	 16	61.3	11.8	 16
381	 16	72.5	9.8	 16
382	 16	62.3	7.6	 16
383	 16	81.8	20.7	 16
384	 16	60.8	13.7	 16
385	 16	168.0	25.0	 16
386	 16	199.8	65.5	 16
387	 16	375.3	38.2	 16
388	 16	289.3	30.1	 16
389	 16	146.5	24.2	 16
390	 16	69.0	10.8	 16
391	 16	72.8	14.1	 16
392	 16	110.5	16.6	 16
393	 16	170.5	25.3	 16
394	 16	221.3	18.2	 16
395	 16	100.0	20.7	 16
396	 16	70.0	11.8	 16
397	 16	68.5	10.1	 16
398	 16	75.5	14.2	 16
399	 16	74.3	11.9	 16
400	 16	174.5	38.3	 16
401	 16	76.5	9.4	 16
402	 16	132.0	25.3	 16
403	 16	115.3	21.6	 16
404	 16	471.5	68.5	 16
405	 16	401.8	33.1	 16
406	 16	105.5	15.6	 16
407	 16	201.5	32.1	 16
408	 16	153.3	19.2	 16
409	 16	85.0	21.7	 16
410	 16	106.3	21.6	 16
411	 16	80.0	18.9	 16
412	 16	81.3	14.2	 16
413	 16	98.0	16.9	 16
414	 16	88.5	16.6	 16
415	 16	92.5	11.5	 16
416	 16	175.3	24.1	 16
417	 16	225.8	34.1	 16
418	 16	127.3	20.8	 16
419	 16	114.3	20.3	 16
420	 16	77.3	16.1	 16
421	 16	67.8	14.9	 16
422	 16	64.3	13.9	 16
423	 16	149.3	15.6	 16
424	 16	75.3	11.9	 16
425	 16	70.8	14.6	 16
426	 16	72.3	14.4	 16
427	 16	162.5	21.9	 16
428	 16	66.0	12.1	 16
429	 16	79.3	11.6	 16
430	 16	73.3	8.8	 16
431	 16	3352.3	383.7	 16
432	 16	72.5	11.3	 16
433	 16	72.8	54.5	 16
434	 16	365.5	58.7	 16
435	 16	214.8	23.6	 16
436	 16	101.3	21.3	 16
437	 16	253.5	42.2	 16
438	 16	268.3	24.3	 16
439	 16	153.0	21.8	 16
440	 16	2282.3	397.0	 16
441	 16	425.5	34.3	 16
442	 16	70.5	16.4	 16
443	 16	79.3	11.6	 16
444	 16	168.8	25.8	 16
445	 16	401.0	44.3	 16
446	 16	228.8	41.1	 16
447	 16	201.0	25.6	 16
448	 16	211.8	27.6	 16
449	 16	172.8	21.3	 16
450	 16	170.5	24.9	 16
451	 16	467.0	53.5	 16
452	 16	116.0	15.5	 16
453	 16	189.3	21.1	 16
454	 16	229.0	36.4	 16
455	 16	61.3	11.0	 16
456	 16	51.8	8.8	 16
457	 16	102.3	12.2	 16
458	 16	340.5	57.2	 16
459	 16	113.0	31.3	 16
460	 16	95.3	19.9	 16
461	 16	108.3	19.3	 16
462	 16	86.3	14.7	 16
463	 16	58.8	13.2	 16
464	 16	82.8	15.3	 16
465	 16	80.8	12.7	 16
466	 16	72.3	14.5	 16
467	 16	107.0	17.4	 16
468	 16	125.8	16.0	 16
469	 16	229.3	84.8	 16
470	 16	277.0	66.0	 20
471	 16	125.8	36.2	 16
472	 16	139.3	24.4	 16
473	 16	85.8	14.9	 16
474	 16	113.3	17.5	 16
475	 16	152.3	22.6	 16
476	 16	57.8	11.1	 16
477	 16	140.0	18.6	 16
478	 16	214.3	39.2	 16
479	 16	111.5	15.2	 16
480	 16	54.8	9.4	 16
481	 16	119.3	18.7	 16
482	 16	76.0	13.1	 16
483	 16	62.0	14.2	 16
484	 16	88.3	16.7	 16
485	 16	54.5	8.2	 16
486	 16	103.0	20.4	 16
487	 16	93.3	15.5	 16
488	 16	83.3	14.9	 16
489	 16	76.5	11.8	 16
490	 16	91.5	18.9	 16
491	 16	57.0	14.8	 16
492	 16	177.0	27.9	 16
493	 16	231.5	26.5	 16
494	 16	60.0	11.3	 16
495	 16	70.5	14.7	 16
496	 16	62.3	9.3	 16
497	 16	65.0	12.1	 16
498	 16	57.0	8.8	 16
499	 16	70.0	11.7	 16
500	 16	67.5	11.1	 16
501	 16	183.5	32.4	 16
502	 16	70.0	14.4	 16
503	 16	167.5	28.9	 16
504	 16	59.0	8.7	 16
505	 16	123.3	23.8	 16
506	 16	69.3	9.5	 16
507	 16	151.0	68.0	 16
508	 16	125.0	22.0	 16
509	 16	137.3	20.6	 16
510	 16	126.5	24.4	 16
511	 16	79.3	18.1	 16
512	 16	64.8	12.5	 16
513	 16	83.5	18.1	 16
514	 16	95.0	17.1	 16
515	 16	67.8	10.0	 16
516	 16	100.3	13.9	 16
517	 16	69.3	12.1	 16
518	 16	73.5	10.6	 16
519	 16	79.3	10.2	 16
520	 16	74.0	11.5	 16
521	 16	52.5	11.1	 16
522	 16	97.3	14.3	 16
523	 16	84.5	13.0	 16
524	 16	55.3	12.2	 16
525	 16	131.3	20.1	 16
526	 16	92.5	12.9	 16
527	 16	187.5	23.7	 16
528	 16	86.5	15.1	 16
529	 16	59.3	11.7	 16
530	 16	176.3	20.8	 16
531	 16	329.3	47.8	 16
532	 16	55.5	6.7	 16
533	 16	77.5	17.7	 16
534	 16	96.0	14.4	 16
535	 16	226.8	31.3	 16
536	 16	76.5	9.4	 16
537	 16	159.8	22.8	 16
538	 16	299.5	35.5	 16
539	 16	123.8	18.8	 16
540	 16	341.0	67.3	 16
541	 16	68.5	13.2	 16
542	 16	80.0	16.3	 16
543	 16	73.3	14.9	 16
544	 16	151.3	27.8	 16
545	 16	144.8	19.9	 16
546	 16	74.3	14.9	 16
547	 16	187.8	31.1	 16
548	 16	121.8	15.1	 16
549	 16	56.3	8.2	 16
550	 16	119.0	124.8	 16
551	 16	64.0	19.5	 16
552	 16	77.5	10.2	 16
553	 16	105.3	23.9	 16
554	 16	636.3	60.0	 16
555	 16	128.0	21.4	 16
556	 16	518.0	55.0	 16
557	 16	181.3	21.5	 16
558	 16	72.3	12.4	 16
559	 16	112.5	19.2	 16
560	 16	61.8	12.1	 16
561	 16	71.0	12.3	 16
562	 16	129.3	18.9	 16
563	 16	91.8	14.4	 16
564	 16	86.3	13.9	 16
565	 16	102.0	16.2	 16
566	 16	69.3	8.6	 16
567	 16	222.3	30.6	 16
568	 16	160.3	19.0	 16
569	 16	191.5	23.4	 16
570	 16	170.5	26.3	 16
571	 16	90.8	17.7	 16
572	 16	108.0	17.6	 16
573	 16	122.5	23.3	 16
574	 16	62.0	10.8	 16
575	 16	64.0	10.2	 16
576	 16	107.0	22.6	 16
577	 16	280.5	35.5	 16
578	 16	104.8	14.2	 16
579	 16	96.8	11.9	 16
580	 16	218.3	26.6	 16
581	 16	101.5	15.1	 16
582	 16	89.3	15.1	 16
583	 16	95.3	22.4	 16
584	 16	207.5	158.7	 16
585	 16	126.0	20.7	 16
586	 16	198.8	24.7	 16
587	 16	114.8	24.6	 16
588	 16	130.3	21.4	 20
589	 16	60.5	11.6	 16
590	 16	66.3	12.3	 16
591	 16	68.5	11.1	 16
592	 16	81.5	13.6	 16
593	 16	164.5	25.7	 16
594	 16	136.8	16.4	 16
595	 16	233.3	19.9	 16
596	 16	116.5	15.1	 16
597	 16	101.5	14.1	 16
598	 16	78.0	14.4	 16
599	 16	136.5	16.1	 16
600	 16	207.5	30.7	 16
601	 16	165.3	24.1	 16
602	 16	147.5	25.2	 16
603	 16	63.3	9.0	 16
604	 16	74.3	7.2	 16
605	 16	143.3	20.3	 16
606	 16	71.8	16.6	 16
607	 16	127.3	32.3	 16
608	 16	126.3	26.2	 16
609	 16	106.5	14.4	 16
610	 16	71.0	9.9	 16
611	 16	62.5	7.9	 16
612	 16	66.3	18.2	 16
613	 16	110.8	20.3	 16
614	 16	103.8	34.6	 16
615	 16	76.3	13.1	 16
616	 16	91.3	13.3	 16
617	 16	296.5	36.2	 16
618	 16	100.8	11.9	 16
619	 16	159.5	28.6	 16
620	 16	170.0	38.3	 16
621	 16	101.3	13.2	 16
622	 16	959.8	116.1	 16
623	 16	711.0	79.7	 16
624	 16	78.8	15.2	 16
625	 16	427.5	46.8	 16
626	 16	109.0	19.4	 16
627	 16	103.3	19.0	 16
628	 16	201.8	30.1	 16
629	 16	127.5	25.5	 16
630	 16	271.5	43.2	 16
631	 16	189.5	23.4	 16
632	 16	119.5	20.1	 16
633	 16	225.0	18.9	 16
634	 16	251.3	30.3	 16
635	 16	259.5	24.4	 16
636	 16	136.5	18.6	 16
637	 16	83.8	13.8	 16
638	 16	275.5	34.8	 16
639	 16	109.3	16.4	 16
640	 16	122.3	17.8	 16
641	 16	331.3	23.0	 16
642	 16	132.3	20.7	 16
643	 16	94.3	18.1	 16
644	 16	170.3	15.4	 16
645	 16	88.3	8.5	 16
646	 16	99.3	17.7	 16
647	 16	88.0	16.5	 16
648	 16	151.3	31.6	 16
649	 16	87.0	16.4	 16
650	 16	66.3	14.9	 16
651	 16	64.0	10.1	 16
652	 16	82.0	12.1	 16
653	 16	150.0	16.3	 16
654	 16	76.3	12.9	 16
655	 16	53.8	8.3	 16
656	 16	556.0	59.2	 16
657	 16	106.3	18.5	 16
658	 16	88.3	19.0	 16
659	 16	70.8	13.8	 16
660	 16	171.5	29.1	 16
661	 16	102.8	18.0	 16
662	 16	1224.5	190.6	 16
663	 16	100.3	17.6	 16
664	 16	111.0	19.7	 16
665	 16	271.0	43.3	 16
666	 16	69.3	11.7	 16
667	 16	59.8	12.3	 16
668	 16	58.3	6.0	 16
669	 16	65.3	12.8	 16
670	 16	68.0	11.9	 16
671	 16	141.5	21.6	 16
672	 16	173.0	324.2	 16
673	 16	70.8	14.3	 16
674	 16	152.3	22.0	 16
675	 16	958.8	131.5	 16
676	 16	130.5	26.7	 16
677	 16	95.5	18.9	 16
678	 16	125.3	14.2	 16
679	 16	78.8	12.7	 16
680	 16	71.0	17.1	 16
681	 16	61.5	9.6	 16
682	 16	56.3	12.2	 16
683	 16	157.5	23.8	 16
684	 16	92.0	16.5	 16
685	 16	101.3	18.0	 16
686	 16	176.3	20.6	 16
687	 16	150.5	33.5	 16
688	 16	78.3	14.1	 16
689	 16	63.0	13.1	 16
690	 16	103.3	21.5	 16
691	 16	104.0	13.6	 16
692	 16	1151.5	194.4	 16
693	 16	69.8	12.4	 16
694	 16	133.8	20.4	 16
695	 16	61.3	8.4	 16
696	 16	84.3	12.7	 16
697	 16	111.3	36.4	 16
698	 16	95.8	23.4	 16
699	 16	58.0	11.0	 16
700	 16	83.8	12.2	 16
701	 16	128.8	16.7	 16
702	 16	803.5	93.0	 16
703	 16	115.3	22.0	 16
704	 16	504.8	41.2	 16
705	 16	354.8	32.9	 16
706	 16	178.5	33.3	 16
707	 16	119.0	21.8	 20
708	 16	251.3	36.0	 16
709	 16	76.5	13.4	 16
710	 16	750.0	119.1	 16
711	 16	8028.8	1206.7	 16
  0	 17	103.5	20.5	 16
  1	 17	96.3	16.6	 16
  2	 17	81.5	14.6	 16
  3	 17	1682.0	289.6	 16
  4	 17	147.8	21.4	 16
  5	 17	181.3	27.9	 16
  6	 17	107.3	13.8	 16
  7	 17	80.3	13.6	 16
  8	 17	307.8	59.7	 16
  9	 17	226.8	64.0	 16
 10	 17	71.3	11.1	 16
 11	 17	68.3	11.7	 16
 12	 17	121.8	27.4	 16
 13	 17	69.3	12.0	 16
 14	 17	113.3	16.4	 16
 15	 17	69.3	12.3	 16
 16	 17	152.0	23.3	 16
 17	 17	96.5	14.6	 16
 18	 17	1471.3	263.9	 16
 19	 17	94.5	12.8	 16
 20	 17	152.3	22.8	 16
 21	 17	102.5	16.8	 16
 22	 17	102.8	15.9	 16
 23	 17	65.8	10.2	 16
 24	 17	203.0	31.1	 16
 25	 17	78.3	20.0	 16
 26	 17	104.0	21.5	 16
 27	 17	60.0	9.4	 16
 28	 17	357.0	87.1	 16
 29	 17	73.0	10.8	 16
 30	 17	73.3	13.4	 16
 31	 17	64.5	10.2	 16
 32	 17	59.0	10.0	 16
 33	 17	66.0	11.4	 16
 34	 17	215.5	30.1	 16
 35	 17	305.3	64.8	 16
 36	 17	102.0	23.4	 16
 37	 17	119.3	12.2	 16
 38	 17	74.3	12.6	 16
 39	 17	455.3	102.2	 16
 40	 17	72.0	11.8	 16
 41	 17	80.5	13.8	 16
 42	 17	75.8	24.6	 16
 43	 17	82.8	13.7	 16
 44	 17	338.0	45.0	 16
 45	 17	357.5	29.0	 16
 46	 17	207.8	32.7	 16
 47	 17	241.3	41.5	 16
 48	 17	108.8	23.7	 16
 49	 17	110.5	23.4	 16
 50	 17	126.3	14.4	 16
 51	 17	126.5	20.6	 16
 52	 17	120.3	22.1	 16
 53	 17	64.0	12.2	 16
 54	 17	79.8	15.3	 16
 55	 17	73.3	8.0	 16
 56	 17	1729.0	435.3	 16
 57	 17	207.0	67.5	 16
 58	 17	76.3	9.9	 16
 59	 17	101.0	15.6	 16
 60	 17	157.3	24.1	 16
 61	 17	294.8	45.0	 16
 62	 17	125.0	17.6	 16
 63	 17	2677.3	411.5	 16
 64	 17	160.0	17.3	 16
 65	 17	150.3	21.4	 16
 66	 17	82.8	14.6	 16
 67	 17	286.5	30.1	 16
 68	 17	397.3	54.4	 16
 69	 17	679.3	51.5	 16
 70	 17	684.5	47.9	 16
 71	 17	574.5	71.6	 16
 72	 17	227.0	34.4	 16
 73	 17	81.0	13.8	 16
 74	 17	265.5	34.5	 16
 75	 17	145.3	26.8	 16
 76	 17	304.3	58.8	 16
 77	 17	244.0	41.9	 16
 78	 17	1007.5	242.8	 16
 79	 17	109.5	19.0	 16
 80	 17	120.0	18.5	 16
 81	 17	82.3	16.1	 16
 82	 17	71.3	13.7	 16
 83	 17	236.5	25.7	 16
 84	 17	62.5	10.0	 16
 85	 17	63.0	17.7	 16
 86	 17	75.5	10.2	 16
 87	 17	123.5	19.4	 16
 88	 17	1252.3	113.9	 16
 89	 17	1663.5	183.3	 16
 90	 17	227.3	46.4	 16
 91	 17	370.3	57.4	 16
 92	 17	191.3	24.8	 16
 93	 17	207.5	21.6	 16
 94	 17	67.3	16.3	 16
 95	 17	163.8	19.7	 16
 96	 17	550.3	71.5	 16
 97	 17	3131.5	502.0	 16
 98	 17	165.3	26.7	 16
 99	 17	1014.3	185.1	 16
100	 17	1393.8	145.6	 16
101	 17	186.0	46.0	 16
102	 17	85.5	11.3	 16
103	 17	67.8	11.8	 16
104	 17	71.0	14.0	 16
105	 17	265.8	33.1	 16
106	 17	77.3	13.8	 16
107	 17	89.8	28.2	 16
108	 17	105.5	20.0	 16
109	 17	171.8	22.2	 16
110	 17	434.3	72.5	 16
111	 17	231.8	32.0	 16
112	 17	168.3	23.8	 16
113	 17	604.0	136.5	 16
114	 17	116.0	24.1	 16
115	 17	439.5	95.3	 16
116	 17	131.0	16.3	 16
117	 17	180.5	31.8	 20
118	 17	199.0	29.5	 16
119	 17	252.3	42.4	 16
120	 17	87.0	16.4	 16
121	 17	72.8	13.0	 16
122	 17	152.0	38.6	 16
123	 17	73.3	15.0	 16
124	 17	343.8	71.9	 16
125	 17	148.5	36.6	 16
126	 17	225.5	45.9	 16
127	 17	129.0	28.5	 16
128	 17	61.5	17.2	 16
129	 17	142.0	46.2	 16
130	 17	68.3	12.4	 16
131	 17	179.3	28.7	 16
132	 17	99.8	19.6	 16
133	 17	119.3	20.4	 16
134	 17	104.3	12.8	 16
135	 17	112.5	19.5	 16
136	 17	115.8	16.6	 16
137	 17	222.8	43.5	 16
138	 17	70.3	9.9	 16
139	 17	74.0	17.1	 16
140	 17	116.8	28.3	 16
141	 17	77.5	15.7	 16
142	 17	501.8	134.7	 16
143	 17	219.8	59.0	 16
144	 17	72.3	8.4	 16
145	 17	76.0	12.4	 16
146	 17	130.5	29.8	 16
147	 17	72.5	11.7	 16
148	 17	182.0	33.7	 16
149	 17	80.3	10.3	 16
150	 17	70.8	18.8	 16
151	 17	79.5	17.1	 16
152	 17	112.0	12.4	 16
153	 17	108.0	24.2	 16
154	 17	216.3	46.4	 16
155	 17	69.3	10.3	 16
156	 17	80.0	11.6	 16
157	 17	1500.0	207.4	 16
158	 17	179.0	31.7	 16
159	 17	417.0	61.8	 16
160	 17	188.3	35.7	 16
161	 17	264.3	37.6	 16
162	 17	180.0	28.1	 16
163	 17	104.3	14.9	 16
164	 17	137.5	17.1	 16
165	 17	68.0	13.7	 16
166	 17	78.8	16.7	 16
167	 17	92.8	15.1	 16
168	 17	273.0	48.7	 16
169	 17	363.3	76.1	 16
170	 17	854.0	165.1	 16
171	 17	96.3	15.0	 16
172	 17	469.8	116.0	 16
173	 17	216.5	32.6	 16
174	 17	340.5	82.5	 16
175	 17	191.5	23.9	 16
176	 17	592.0	101.3	 16
177	 17	366.0	55.9	 16
178	 17	825.8	66.3	 16
179	 17	347.5	29.1	 16
180	 17	179.0	22.6	 16
181	 17	145.3	23.4	 16
182	 17	150.5	41.5	 16
183	 17	152.3	24.5	 16
184	 17	76.0	11.7	 16
185	 17	113.8	12.9	 16
186	 17	260.0	63.6	 16
187	 17	2427.0	390.6	 16
188	 17	65.3	11.3	 16
189	 17	125.0	20.2	 16
190	 17	79.8	15.5	 16
191	 17	203.0	31.6	 16
192	 17	96.5	18.1	 16
193	 17	269.8	24.2	 16
194	 17	3205.8	279.6	 16
195	 17	167.5	30.4	 16
196	 17	100.3	15.3	 16
197	 17	68.3	7.8	 16
198	 17	558.3	119.2	 16
199	 17	544.3	142.1	 16
200	 17	798.3	204.9	 16
201	 17	93.5	19.1	 16
202	 17	124.3	15.6	 16
203	 17	185.8	21.3	 16
204	 17	82.8	17.6	 16
205	 17	65.5	15.1	 16
206	 17	88.8	17.6	 16
207	 17	174.0	35.3	 16
208	 17	199.3	41.4	 16
209	 17	79.5	14.9	 16
210	 17	416.0	59.6	 16
211	 17	67.8	14.9	 16
212	 17	645.0	103.3	 16
213	 17	253.8	47.8	 16
214	 17	171.3	20.9	 16
215	 17	70.5	20.0	 16
216	 17	75.8	13.2	 16
217	 17	188.5	20.7	 16
218	 17	64.3	14.6	 16
219	 17	58.8	12.7	 16
220	 17	124.0	22.2	 16
221	 17	71.3	10.6	 16
222	 17	68.5	13.4	 16
223	 17	69.0	12.3	 16
224	 17	221.5	54.6	 16
225	 17	59.0	12.3	 16
226	 17	78.0	11.7	 16
227	 17	69.3	14.5	 16
228	 17	344.3	66.2	 16
229	 17	307.0	36.5	 16
230	 17	85.3	14.5	 16
231	 17	487.5	48.4	 16
232	 17	118.8	21.7	 16
233	 17	1450.3	255.7	 16
234	 17	514.5	55.0	 16
235	 17	212.0	40.1	 16
236	 17	81.3	10.9	 20
237	 17	166.8	22.7	 16
238	 17	62.0	11.6	 16
239	 17	195.0	34.1	 16
240	 17	86.5	16.2	 16
241	 17	375.8	105.0	 16
242	 17	247.5	44.4	 16
243	 17	438.5	85.1	 16
244	 17	97.5	60.0	 16
245	 17	761.8	222.9	 16
246	 17	210.0	91.5	 16
247	 17	113.5	22.6	 16
248	 17	97.3	29.7	 16
249	 17	142.3	18.9	 16
250	 17	539.0	50.7	 16
251	 17	429.0	105.0	 16
252	 17	209.5	38.9	 16
253	 17	661.0	158.2	 16
254	 17	194.8	37.5	 16
255	 17	66.8	9.3	 16
256	 17	130.3	18.8	 16
257	 17	145.3	29.9	 16
258	 17	271.5	26.2	 16
259	 17	216.5	44.4	 16
260	 17	204.8	29.6	 16
261	 17	404.0	39.7	 16
262	 17	120.3	18.8	 16
263	 17	58.3	10.6	 16
264	 17	100.8	17.0	 16
265	 17	90.3	9.8	 16
266	 17	120.5	26.4	 16
267	 17	79.3	33.7	 16
268	 17	247.3	49.2	 16
269	 17	460.3	86.4	 16
270	 17	194.5	33.9	 16
271	 17	328.8	89.3	 16
272	 17	269.0	74.1	 16
273	 17	214.3	43.8	 16
274	 17	75.3	9.8	 16
275	 17	765.0	145.7	 16
276	 17	185.3	32.9	 16
277	 17	419.5	61.0	 16
278	 17	171.8	29.5	 16
279	 17	137.5	21.5	 16
280	 17	71.5	11.8	 16
281	 17	105.0	17.4	 16
282	 17	148.3	28.0	 16
283	 17	67.5	11.2	 16
284	 17	94.0	14.3	 16
285	 17	63.0	10.8	 16
286	 17	76.0	11.0	 16
287	 17	148.0	23.8	 16
288	 17	89.3	19.7	 16
289	 17	87.8	14.4	 16
290	 17	218.5	36.3	 16
291	 17	109.8	21.0	 16
292	 17	134.0	28.7	 16
293	 17	109.8	35.1	 16
294	 17	71.8	15.2	 16
295	 17	85.3	19.5	 16
296	 17	82.0	15.3	 16
297	 17	61.3	11.8	 16
298	 17	99.0	20.1	 16
299	 17	91.0	16.4	 16
300	 17	533.3	69.9	 16
301	 17	187.8	28.3	 16
302	 17	599.0	105.0	 16
303	 17	265.0	38.0	 16
304	 17	126.8	23.2	 16
305	 17	298.0	39.0	 16
306	 17	213.8	30.9	 16
307	 17	10125.0	1331.8	 16
308	 17	9422.8	1490.7	 16
309	 17	7928.3	1643.7	 16
310	 17	167.5	21.8	 16
311	 17	111.5	41.3	 16
312	 17	111.8	18.7	 16
313	 17	279.8	46.9	 16
314	 17	193.0	41.6	 16
315	 17	131.5	16.1	 16
316	 17	840.3	108.2	 16
317	 17	200.8	240.3	 16
318	 17	189.0	43.9	 16
319	 17	75.3	12.5	 16
320	 17	175.5	20.5	 16
321	 17	83.8	13.8	 16
322	 17	233.8	43.4	 16
323	 17	102.3	67.5	 16
324	 17	102.0	25.0	 16
325	 17	65.3	11.8	 16
326	 17	70.5	12.1	 16
327	 17	214.3	38.3	 16
328	 17	82.3	14.1	 16
329	 17	95.0	11.1	 16
330	 17	522.0	70.7	 16
331	 17	220.8	29.6	 16
332	 17	615.0	123.9	 16
333	 17	260.8	38.6	 16
334	 17	81.0	17.8	 16
335	 17	930.0	189.8	 16
336	 17	290.3	43.6	 16
337	 17	217.0	24.0	 16
338	 17	263.0	23.7	 16
339	 17	2490.0	486.2	 16
340	 17	101.0	16.1	 16
341	 17	67.0	8.3	 16
342	 17	359.3	61.5	 16
343	 17	113.8	23.7	 16
344	 17	201.5	26.4	 16
345	 17	191.0	36.4	 16
346	 17	171.8	20.2	 16
347	 17	102.8	20.0	 16
348	 17	225.8	30.4	 16
349	 17	97.5	17.3	 16
350	 17	67.3	12.1	 16
351	 17	119.5	11.6	 16
352	 17	1926.5	160.2	 16
353	 17	57.5	9.6	 16
354	 17	182.0	27.6	 20
355	 17	159.5	28.2	 16
356	 17	358.5	82.6	 16
357	 17	143.3	21.5	 16
358	 17	118.8	11.8	 16
359	 17	81.0	10.8	 16
360	 17	94.3	14.8	 16
361	 17	271.0	83.0	 16
362	 17	161.8	28.3	 16
363	 17	121.0	15.5	 16
364	 17	116.5	12.1	 16
365	 17	847.0	217.1	 16
366	 17	232.0	43.0	 16
367	 17	73.5	14.7	 16
368	 17	72.3	13.3	 16
369	 17	591.3	77.3	 16
370	 17	92.5	12.6	 16
371	 17	69.8	17.2	 16
372	 17	89.5	14.5	 16
373	 17	111.5	15.2	 16
374	 17	81.3	17.4	 16
375	 17	122.3	20.4	 16
376	 17	491.5	117.0	 16
377	 17	153.3	24.9	 16
378	 17	111.8	19.7	 16
379	 17	60.5	14.1	 16
380	 17	70.8	11.5	 16
381	 17	124.8	28.3	 16
382	 17	79.8	16.0	 16
383	 17	128.8	27.5	 16
384	 17	149.0	27.3	 16
385	 17	424.8	38.4	 16
386	 17	149.0	20.9	 16
387	 17	339.3	59.6	 16
388	 17	51.0	8.5	 16
389	 17	136.0	13.5	 16
390	 17	84.3	13.0	 16
391	 17	107.8	14.3	 16
392	 17	124.5	18.9	 16
393	 17	92.8	17.3	 16
394	 17	172.0	21.7	 16
395	 17	255.3	20.6	 16
396	 17	106.0	20.7	 16
397	 17	62.3	13.6	 16
398	 17	85.5	16.5	 16
399	 17	162.0	34.5	 16
400	 17	109.5	20.8	 16
401	 17	85.0	13.4	 16
402	 17	166.3	27.2	 16
403	 17	188.0	24.4	 16
404	 17	129.8	23.7	 16
405	 17	75.8	11.8	 16
406	 17	140.0	26.3	 16
407	 17	496.0	77.1	 16
408	 17	61.0	9.1	 16
409	 17	61.3	11.4	 16
410	 17	58.3	9.8	 16
411	 17	101.3	16.5	 16
412	 17	127.5	29.6	 16
413	 17	112.5	22.0	 16
414	 17	138.5	14.7	 16
415	 17	116.3	25.7	 16
416	 17	103.8	63.4	 16
417	 17	155.0	31.9	 16
418	 17	465.0	60.7	 16
419	 17	67.3	12.3	 16
420	 17	519.0	116.7	 16
421	 17	79.5	12.1	 16
422	 17	87.0	15.1	 16
423	 17	141.3	17.3	 16
424	 17	151.3	15.3	 16
425	 17	133.3	16.9	 16
426	 17	440.3	37.9	 16
427	 17	185.3	26.4	 16
428	 17	80.3	18.5	 16
429	 17	65.3	13.5	 16
430	 17	493.5	72.0	 16
431	 17	232.8	29.8	 16
432	 17	269.3	34.0	 16
433	 17	63.3	13.0	 16
434	 17	192.5	36.2	 16
435	 17	85.3	13.5	 16
436	 17	137.5	26.9	 16
437	 17	135.8	23.7	 16
438	 17	226.3	27.3	 16
439	 17	70.0	13.5	 16
440	 17	465.8	64.7	 16
441	 17	418.5	60.6	 16
442	 17	233.3	30.0	 16
443	 17	301.3	29.9	 16
444	 17	268.0	31.2	 16
445	 17	103.3	16.9	 16
446	 17	118.8	18.1	 16
447	 17	189.0	34.1	 16
448	 17	72.3	14.5	 16
449	 17	68.3	13.3	 16
450	 17	77.3	10.2	 16
451	 17	79.0	14.6	 16
452	 17	326.5	23.1	 16
453	 17	126.8	21.7	 16
454	 17	103.3	20.6	 16
455	 17	152.5	26.2	 16
456	 17	185.0	32.7	 16
457	 17	83.8	17.5	 16
458	 17	70.8	15.2	 16
459	 17	141.3	18.1	 16
460	 17	307.5	64.6	 16
461	 17	81.8	15.3	 16
462	 17	148.5	26.9	 16
463	 17	112.5	22.9	 16
464	 17	1282.0	178.5	 16
465	 17	697.0	123.1	 16
466	 17	66.5	16.8	 16
467	 17	182.5	34.8	 16
468	 17	114.3	23.0	 16
469	 17	123.5	16.5	 16
470	 17	145.3	22.2	 16
471	 17	66.3	12.6	 16
472	 17	104.0	21.3	 16
473	 17	67.3	12.3	 20
474	 17	156.5	30.1	 16
475	 17	281.8	25.5	 16
476	 17	85.5	10.6	 16
477	 17	79.0	15.7	 16
478	 17	266.8	34.6	 16
479	 17	621.8	102.3	 16
480	 17	137.8	33.1	 16
481	 17	89.0	15.6	 16
482	 17	533.3	112.7	 16
483	 17	413.0	100.0	 16
484	 17	85.0	20.3	 16
485	 17	207.0	33.0	 16
486	 17	87.3	13.2	 16
487	 17	223.8	35.6	 16
488	 17	70.3	13.1	 16
489	 17	84.3	16.3	 16
490	 17	60.0	10.1	 16
491	 17	147.3	35.4	 16
492	 17	64.3	16.9	 16
493	 17	146.8	22.6	 16
494	 17	1244.5	335.7	 16
495	 17	431.8	42.8	 16
496	 17	207.8	37.6	 16
497	 17	317.8	63.9	 16
498	 17	197.3	33.6	 16
499	 17	75.0	18.2	 16
500	 17	101.0	15.8	 16
501	 17	329.8	73.4	 16
502	 17	110.0	19.8	 16
503	 17	292.3	49.9	 16
504	 17	96.5	17.8	 16
505	 17	59.8	14.6	 16
506	 17	65.3	9.5	 16
507	 17	56.8	12.0	 16
508	 17	60.8	14.2	 16
509	 17	66.8	15.0	 16
510	 17	191.5	26.4	 16
511	 17	299.3	48.7	 16
512	 17	63.0	8.6	 16
513	 17	63.8	12.2	 16
514	 17	64.5	12.1	 16
515	 17	518.0	83.1	 16
516	 17	131.5	17.6	 16
517	 17	159.3	43.6	 16
518	 17	283.5	45.9	 16
519	 17	69.5	16.0	 16
520	 17	87.0	16.2	 16
521	 17	143.5	34.1	 16
522	 17	84.5	14.0	 16
523	 17	288.0	32.2	 16
524	 17	145.0	20.7	 16
525	 17	96.3	10.6	 16
526	 17	482.0	91.8	 16
527	 17	92.8	17.0	 16
528	 17	177.0	24.7	 16
529	 17	102.3	16.5	 16
530	 17	156.0	27.7	 16
531	 17	412.5	69.7	 16
532	 17	67.5	24.5	 16
533	 17	84.3	11.5	 16
534	 17	400.3	57.3	 16
535	 17	63.5	12.5	 16
536	 17	68.0	10.9	 16
537	 17	70.0	12.4	 16
538	 17	64.0	11.7	 16
539	 17	59.0	9.5	 16
540	 17	141.3	22.6	 16
541	 17	143.3	15.4	 16
542	 17	213.5	20.4	 16
543	 17	165.8	23.8	 16
544	 17	139.3	26.6	 16
545	 17	119.3	19.4	 16
546	 17	93.8	15.6	 16
547	 17	92.8	26.9	 16
548	 17	101.0	18.1	 16
549	 17	116.0	21.4	 16
550	 17	201.8	26.5	 16
551	 17	242.3	26.4	 16
552	 17	739.0	115.3	 16
553	 17	539.3	79.8	 16
554	 17	552.8	88.6	 16
555	 17	532.8	51.9	 16
556	 17	136.8	22.8	 16
557	 17	87.3	19.5	 16
558	 17	141.8	17.5	 16
559	 17	1298.0	67.4	 16
560	 17	107.0	27.5	 16
561	 17	66.5	13.5	 16
562	 17	121.5	22.1	 16
563	 17	186.3	24.5	 16
564	 17	3428.0	337.6	 16
565	 17	115.3	20.2	 16
566	 17	95.8	19.1	 16
567	 17	107.5	20.6	 16
568	 17	91.3	15.5	 16
569	 17	558.0	102.6	 16
570	 17	67.0	10.3	 16
571	 17	63.3	13.1	 16
572	 17	73.0	10.2	 16
573	 17	186.0	31.0	 16
574	 17	118.8	19.3	 16
575	 17	571.3	72.4	 16
576	 17	392.5	58.1	 16
577	 17	74.3	15.5	 16
578	 17	117.3	21.3	 16
579	 17	228.3	55.0	 16
580	 17	1245.8	162.5	 16
581	 17	269.0	73.3	 16
582	 17	263.8	24.2	 16
583	 17	80.3	12.3	 16
584	 17	2379.8	415.9	 16
585	 17	497.5	65.8	 16
586	 17	145.3	24.3	 16
587	 17	122.3	26.4	 16
588	 17	116.3	21.9	 16
589	 17	155.3	16.5	 16
590	 17	893.5	198.8	 16
591	 17	93.3	12.4	 16
592	 17	87.3	14.0	 20
593	 17	1440.5	285.5	 16
594	 17	91.8	18.3	 16
595	 17	109.3	15.3	 16
596	 17	458.5	33.9	 16
597	 17	533.5	59.9	 16
598	 17	79.8	15.4	 16
599	 17	105.0	20.1	 16
600	 17	145.8	20.7	 16
601	 17	564.0	79.0	 16
602	 17	1133.3	173.8	 16
603	 17	138.5	23.2	 16
604	 17	273.0	62.4	 16
605	 17	139.0	20.9	 16
606	 17	148.3	23.7	 16
607	 17	108.3	19.6	 16
608	 17	183.3	28.7	 16
609	 17	177.0	26.7	 16
610	 17	129.5	23.0	 16
611	 17	249.5	30.3	 16
612	 17	70.0	13.3	 16
613	 17	51.0	10.9	 16
614	 17	77.3	12.4	 16
615	 17	703.0	103.8	 16
616	 17	107.5	17.4	 16
617	 17	182.0	28.7	 16
618	 17	777.8	94.2	 16
619	 17	461.3	68.0	 16
620	 17	178.8	25.8	 16
621	 17	296.5	53.0	 16
622	 17	512.0	50.0	 16
623	 17	440.0	66.0	 16
624	 17	356.8	55.9	 16
625	 17	218.5	30.2	 16
626	 17	81.3	13.2	 16
627	 17	173.0	30.7	 16
628	 17	129.8	19.3	 16
629	 17	230.3	32.2	 16
630	 17	143.8	16.2	 16
631	 17	83.5	17.7	 16
632	 17	63.3	11.2	 16
633	 17	269.0	44.4	 16
634	 17	257.8	35.5	 16
635	 17	296.8	38.2	 16
636	 17	64.5	11.0	 16
637	 17	89.5	60.5	 16
638	 17	134.5	55.5	 16
639	 17	1186.8	111.7	 16
640	 17	367.3	66.1	 16
641	 17	222.5	31.5	 16
642	 17	467.3	45.2	 16
643	 17	361.5	57.7	 16
644	 17	76.8	13.4	 16
645	 17	785.5	152.8	 16
646	 17	393.5	68.8	 16
647	 17	198.3	16.6	 16
648	 17	221.3	34.8	 16
649	 17	174.5	24.0	 16
650	 17	92.5	17.4	 16
651	 17	89.5	16.2	 16
652	 17	113.0	20.6	 16
653	 17	156.5	18.5	 16
654	 17	210.0	23.0	 16
655	 17	76.0	18.5	 16
656	 17	64.0	13.9	 16
657	 17	107.3	18.2	 16
658	 17	63.5	11.6	 16
659	 17	433.3	40.0	 16
660	 17	96.0	15.2	 16
661	 17	197.0	30.6	 16
662	 17	187.0	19.2	 16
663	 17	111.0	12.5	 16
664	 17	76.8	71.5	 16
665	 17	68.5	15.3	 16
666	 17	397.8	38.7	 16
667	 17	213.0	34.9	 16
668	 17	58.0	6.7	 16
669	 17	75.0	9.3	 16
670	 17	110.0	19.3	 16
671	 17	2617.0	401.5	 16
672	 17	2303.3	377.5	 16
673	 17	75.5	12.5	 16
674	 17	492.5	85.5	 16
675	 17	463.8	84.4	 16
676	 17	236.0	23.3	 16
677	 17	439.0	71.9	 16
678	 17	177.0	59.5	 16
679	 17	134.0	16.2	 16
680	 17	171.5	24.3	 16
681	 17	160.3	23.8	 16
682	 17	103.0	14.4	 16
683	 17	111.5	12.0	 16
684	 17	171.3	24.9	 16
685	 17	217.3	19.7	 16
686	 17	96.5	16.4	 16
687	 17	214.0	19.0	 16
688	 17	487.5	64.1	 16
689	 17	62.5	10.5	 16
690	 17	103.8	31.9	 16
691	 17	160.8	19.6	 16
692	 17	191.3	22.9	 16
693	 17	187.3	24.5	 16
694	 17	533.3	113.3	 16
695	 17	105.5	20.2	 16
696	 17	149.5	25.7	 16
697	 17	192.8	24.9	 16
698	 17	325.8	42.2	 16
699	 17	83.8	13.4	 16
700	 17	78.3	12.4	 16
701	 17	193.5	34.8	 16
702	 17	310.3	30.2	 16
703	 17	394.5	76.7	 16
704	 17	158.3	20.0	 16
705	 17	112.8	17.9	 16
706	 17	99.0	17.8	 16
707	 17	128.5	26.0	 16
708	 17	79.8	11.8	 16
709	 17	144.3	23.9	 16
710	 17	116.3	17.2	 20
711	 17	89.0	12.4	 16
  0	 18	3926.3	891.3	 16
  1	 18	95.8	15.3	 16
  2	 18	68.3	28.3	 20
  3	 18	318.5	78.4	 16
  4	 18	78.8	18.2	 16
  5	 18	172.3	34.0	 16
  6	 18	125.3	20.2	 16
  7	 18	98.5	14.1	 16
  8	 18	134.3	27.9	 16
  9	 18	88.8	16.9	 16
 10	 18	72.0	8.5	 16
 11	 18	74.8	13.3	 16
 12	 18	83.3	14.6	 16
 13	 18	84.3	14.5	 16
 14	 18	85.0	21.7	 16
 15	 18	64.5	8.4	 16
 16	 18	195.3	28.9	 16
 17	 18	85.3	13.9	 16
 18	 18	290.5	32.4	 16
 19	 18	137.0	21.4	 16
 20	 18	91.0	14.3	 16
 21	 18	111.0	18.9	 16
 22	 18	80.0	13.9	 16
 23	 18	61.5	9.8	 16
 24	 18	156.0	28.0	 16
 25	 18	67.5	11.0	 16
 26	 18	108.3	21.7	 16
 27	 18	70.5	11.6	 16
 28	 18	82.5	19.1	 16
 29	 18	74.0	20.2	 16
 30	 18	65.0	9.9	 16
 31	 18	69.8	10.9	 16
 32	 18	61.3	8.3	 16
 33	 18	67.0	8.2	 16
 34	 18	119.0	24.6	 16
 35	 18	206.0	36.2	 16
 36	 18	94.0	18.4	 16
 37	 18	107.0	19.5	 16
 38	 18	74.5	14.3	 16
 39	 18	115.0	21.7	 16
 40	 18	85.0	18.3	 16
 41	 18	69.3	10.2	 16
 42	 18	75.0	10.8	 16
 43	 18	85.3	19.2	 16
 44	 18	140.3	20.8	 16
 45	 18	274.3	34.7	 16
 46	 18	106.5	18.2	 16
 47	 18	134.3	18.5	 16
 48	 18	81.0	11.4	 16
 49	 18	78.8	14.9	 16
 50	 18	98.3	17.2	 16
 51	 18	120.3	16.9	 16
 52	 18	101.3	20.2	 16
 53	 18	62.0	12.1	 16
 54	 18	69.0	10.4	 16
 55	 18	86.8	16.6	 16
 56	 18	258.0	141.5	 16
 57	 18	75.5	20.2	 16
 58	 18	69.3	11.9	 16
 59	 18	80.3	16.2	 16
 60	 18	98.8	16.2	 16
 61	 18	101.5	21.9	 16
 62	 18	80.8	13.2	 16
 63	 18	452.0	89.5	 16
 64	 18	103.8	16.1	 16
 65	 18	72.3	13.8	 16
 66	 18	103.3	13.1	 16
 67	 18	100.3	13.0	 16
 68	 18	93.3	16.3	 16
 69	 18	367.5	43.8	 16
 70	 18	330.5	39.3	 16
 71	 18	180.8	32.0	 16
 72	 18	153.0	18.9	 16
 73	 18	89.3	10.5	 16
 74	 18	127.5	24.0	 16
 75	 18	81.3	11.1	 16
 76	 18	88.5	23.4	 16
 77	 18	84.5	17.3	 16
 78	 18	217.5	40.3	 16
 79	 18	128.5	23.1	 16
 80	 18	79.0	11.4	 16
 81	 18	75.5	14.4	 16
 82	 18	65.3	7.9	 16
 83	 18	86.0	17.4	 16
 84	 18	63.8	10.1	 16
 85	 18	75.5	17.6	 16
 86	 18	78.5	17.2	 16
 87	 18	118.3	23.2	 16
 88	 18	318.3	50.4	 16
 89	 18	368.8	43.9	 16
 90	 18	103.0	15.0	 16
 91	 18	222.5	29.0	 16
 92	 18	210.8	29.0	 16
 93	 18	184.3	24.4	 16
 94	 18	77.0	13.1	 16
 95	 18	114.5	21.9	 16
 96	 18	338.0	47.3	 16
 97	 18	516.3	107.8	 16
 98	 18	156.0	27.0	 16
 99	 18	247.3	40.9	 16
100	 18	356.8	88.3	 16
101	 18	148.0	18.1	 16
102	 18	90.8	14.1	 16
103	 18	87.3	19.4	 16
104	 18	73.8	13.7	 16
105	 18	155.3	91.6	 16
106	 18	74.3	18.3	 16
107	 18	71.5	11.7	 16
108	 18	78.3	8.2	 16
109	 18	149.0	19.1	 16
110	 18	109.0	12.7	 16
111	 18	195.3	26.3	 16
112	 18	290.0	37.9	 16
113	 18	97.8	13.9	 16
114	 18	67.5	8.7	 16
115	 18	216.5	22.4	 16
116	 18	149.8	15.6	 16
117	 18	137.5	22.3	 16
118	 18	119.8	19.6	 16
119	 18	156.8	21.7	 16
120	 18	105.5	15.5	 20
121	 18	63.5	11.9	 16
122	 18	71.3	13.2	 16
123	 18	86.8	13.5	 16
124	 18	187.0	25.7	 16
125	 18	133.3	16.8	 16
126	 18	249.5	39.3	 16
127	 18	97.0	19.5	 16
128	 18	76.3	15.7	 16
129	 18	72.3	11.4	 16
130	 18	86.5	15.0	 16
131	 18	160.8	24.3	 16
132	 18	85.3	14.9	 16
133	 18	75.3	14.8	 16
134	 18	85.0	9.1	 16
135	 18	72.0	10.6	 16
136	 18	89.8	17.9	 16
137	 18	99.3	12.0	 16
138	 18	84.3	15.3	 16
139	 18	59.5	11.0	 16
140	 18	81.8	8.2	 16
141	 18	65.3	12.2	 16
142	 18	106.8	19.7	 16
143	 18	69.3	13.9	 16
144	 18	71.8	14.1	 16
145	 18	62.5	12.8	 16
146	 18	76.0	18.1	 16
147	 18	83.3	11.7	 16
148	 18	100.0	25.6	 16
149	 18	61.0	14.6	 16
150	 18	60.5	9.4	 16
151	 18	93.8	28.2	 16
152	 18	122.3	23.8	 16
153	 18	101.3	17.0	 16
154	 18	85.5	11.5	 16
155	 18	78.0	15.3	 16
156	 18	81.5	14.1	 16
157	 18	324.3	46.8	 16
158	 18	100.5	16.8	 16
159	 18	138.5	27.4	 16
160	 18	249.3	39.1	 16
161	 18	105.3	10.7	 16
162	 18	140.0	20.4	 16
163	 18	73.8	9.8	 16
164	 18	104.0	15.2	 16
165	 18	64.8	10.9	 16
166	 18	86.3	14.4	 16
167	 18	83.0	10.5	 16
168	 18	82.3	14.1	 16
169	 18	127.0	27.4	 16
170	 18	198.8	50.6	 16
171	 18	80.3	13.5	 16
172	 18	412.3	35.6	 16
173	 18	167.0	19.6	 16
174	 18	149.3	16.5	 16
175	 18	249.0	47.4	 16
176	 18	845.8	96.0	 16
177	 18	542.0	61.2	 16
178	 18	1031.5	123.3	 16
179	 18	429.8	34.2	 16
180	 18	143.5	20.7	 16
181	 18	111.0	18.6	 16
182	 18	212.0	74.0	 16
183	 18	131.8	20.1	 16
184	 18	114.3	156.3	 16
185	 18	77.0	10.6	 16
186	 18	96.8	14.3	 16
187	 18	151.3	35.5	 16
188	 18	73.0	10.0	 16
189	 18	110.8	22.8	 16
190	 18	67.3	11.7	 16
191	 18	102.3	19.3	 16
192	 18	96.8	20.0	 16
193	 18	238.5	65.7	 16
194	 18	2110.0	209.6	 16
195	 18	263.8	20.8	 16
196	 18	73.3	17.1	 16
197	 18	64.5	11.3	 16
198	 18	141.3	25.6	 16
199	 18	252.3	40.0	 16
200	 18	381.8	42.3	 16
201	 18	120.5	15.1	 16
202	 18	131.0	17.8	 16
203	 18	145.3	15.9	 16
204	 18	80.5	13.3	 16
205	 18	84.0	21.9	 16
206	 18	145.5	25.5	 16
207	 18	61.0	8.1	 16
208	 18	65.8	10.7	 16
209	 18	70.3	10.1	 16
210	 18	229.5	30.3	 16
211	 18	82.5	36.4	 16
212	 18	162.8	17.7	 16
213	 18	98.5	15.0	 16
214	 18	93.8	17.2	 16
215	 18	71.8	14.8	 16
216	 18	65.5	14.4	 16
217	 18	76.8	11.3	 16
218	 18	62.3	10.0	 16
219	 18	65.0	12.3	 16
220	 18	76.0	10.8	 16
221	 18	61.8	14.9	 16
222	 18	65.0	8.0	 16
223	 18	60.0	9.6	 16
224	 18	69.5	8.2	 16
225	 18	68.3	11.9	 16
226	 18	77.0	13.9	 16
227	 18	68.0	11.1	 16
228	 18	106.3	13.6	 16
229	 18	117.5	15.5	 16
230	 18	78.3	14.6	 16
231	 18	706.8	75.2	 16
232	 18	152.8	21.2	 16
233	 18	486.0	54.3	 16
234	 18	379.0	50.7	 16
235	 18	103.5	15.0	 16
236	 18	77.8	15.2	 16
237	 18	206.5	23.6	 16
238	 18	63.5	11.4	 16
239	 18	131.3	19.7	 20
240	 18	79.0	11.9	 16
241	 18	73.3	13.2	 16
242	 18	198.8	26.0	 16
243	 18	534.8	66.8	 16
244	 18	113.3	24.7	 16
245	 18	181.3	42.0	 16
246	 18	99.5	17.4	 16
247	 18	64.3	7.6	 16
248	 18	91.3	17.5	 16
249	 18	78.3	14.4	 16
250	 18	76.8	16.9	 16
251	 18	80.5	11.9	 16
252	 18	93.0	12.8	 16
253	 18	78.8	13.4	 16
254	 18	95.5	13.0	 16
255	 18	70.0	8.0	 16
256	 18	123.5	14.4	 16
257	 18	78.3	13.9	 16
258	 18	260.5	31.7	 16
259	 18	86.3	11.8	 16
260	 18	118.0	16.7	 16
261	 18	676.5	90.3	 16
262	 18	155.5	18.2	 16
263	 18	84.8	17.8	 16
264	 18	74.0	11.4	 16
265	 18	112.8	16.6	 16
266	 18	82.0	11.9	 16
267	 18	77.8	12.8	 16
268	 18	137.8	26.7	 16
269	 18	351.3	41.2	 16
270	 18	166.3	22.7	 16
271	 18	106.5	22.2	 16
272	 18	95.5	15.5	 16
273	 18	69.3	12.1	 16
274	 18	69.3	19.1	 16
275	 18	184.3	34.4	 16
276	 18	151.0	27.5	 16
277	 18	122.8	17.0	 16
278	 18	100.8	13.4	 16
279	 18	112.5	17.0	 16
280	 18	74.5	14.3	 16
281	 18	83.5	11.6	 16
282	 18	106.5	16.6	 16
283	 18	74.8	21.2	 16
284	 18	71.3	9.6	 16
285	 18	57.3	12.2	 16
286	 18	68.5	10.0	 16
287	 18	120.0	35.1	 16
288	 18	103.5	15.9	 16
289	 18	80.8	40.2	 16
290	 18	166.0	25.7	 16
291	 18	121.0	17.0	 16
292	 18	114.0	76.2	 16
293	 18	63.3	10.8	 16
294	 18	55.3	14.1	 16
295	 18	66.3	10.3	 16
296	 18	68.0	14.3	 16
297	 18	61.3	12.1	 16
298	 18	61.8	10.8	 16
299	 18	77.0	12.0	 16
300	 18	154.3	30.8	 16
301	 18	110.8	18.1	 16
302	 18	96.3	15.5	 16
303	 18	150.3	18.3	 16
304	 18	137.0	15.5	 16
305	 18	85.3	14.8	 16
306	 18	113.3	24.8	 16
307	 18	1834.0	239.6	 16
308	 18	1660.3	252.2	 16
309	 18	1177.8	253.3	 16
310	 18	100.3	14.0	 16
311	 18	86.3	13.9	 16
312	 18	123.0	17.8	 16
313	 18	181.5	17.4	 16
314	 18	124.3	19.2	 16
315	 18	165.8	23.1	 16
316	 18	625.0	52.8	 16
317	 18	75.8	14.1	 16
318	 18	95.0	14.1	 16
319	 18	69.0	11.5	 16
320	 18	82.8	18.0	 16
321	 18	79.3	8.8	 16
322	 18	104.5	20.7	 16
323	 18	86.3	16.6	 16
324	 18	67.0	12.6	 16
325	 18	63.0	131.3	 16
326	 18	63.8	5.8	 16
327	 18	82.3	14.3	 16
328	 18	68.5	10.2	 16
329	 18	84.8	16.5	 16
330	 18	153.8	26.9	 16
331	 18	161.5	67.5	 16
332	 18	98.5	21.5	 16
333	 18	160.5	31.7	 16
334	 18	73.0	10.6	 16
335	 18	243.5	32.7	 16
336	 18	163.8	28.0	 16
337	 18	70.0	12.6	 16
338	 18	150.3	17.6	 16
339	 18	1016.3	114.1	 16
340	 18	89.5	14.5	 16
341	 18	61.0	14.2	 16
342	 18	195.0	30.2	 16
343	 18	82.3	11.7	 16
344	 18	103.8	19.3	 16
345	 18	109.8	42.3	 16
346	 18	96.3	14.0	 16
347	 18	253.5	39.8	 16
348	 18	185.8	26.8	 16
349	 18	223.0	20.0	 16
350	 18	77.0	14.8	 16
351	 18	73.5	10.9	 16
352	 18	892.8	88.1	 16
353	 18	70.3	10.0	 16
354	 18	291.8	35.2	 16
355	 18	87.5	12.1	 16
356	 18	89.8	14.2	 16
357	 18	92.3	11.9	 16
358	 18	97.3	20.0	 20
359	 18	78.3	10.0	 16
360	 18	73.3	12.7	 16
361	 18	136.3	97.9	 16
362	 18	92.8	17.8	 16
363	 18	158.5	21.8	 16
364	 18	179.8	32.2	 16
365	 18	120.0	20.9	 16
366	 18	112.0	17.9	 16
367	 18	67.8	12.4	 16
368	 18	73.3	11.2	 16
369	 18	165.8	28.5	 16
370	 18	64.5	12.9	 16
371	 18	64.3	17.3	 16
372	 18	82.0	19.6	 16
373	 18	86.3	19.4	 16
374	 18	60.3	12.3	 16
375	 18	76.0	13.3	 16
376	 18	82.0	14.0	 16
377	 18	111.3	16.4	 16
378	 18	57.5	10.2	 16
379	 18	62.0	8.2	 16
380	 18	80.0	15.5	 16
381	 18	205.5	17.5	 16
382	 18	74.8	17.3	 16
383	 18	138.5	15.2	 16
384	 18	121.0	20.6	 16
385	 18	974.3	94.6	 16
386	 18	189.3	20.3	 16
387	 18	144.8	21.5	 16
388	 18	61.5	12.0	 16
389	 18	135.0	70.9	 16
390	 18	87.8	11.9	 16
391	 18	112.5	19.1	 16
392	 18	70.0	14.9	 16
393	 18	96.0	12.6	 16
394	 18	116.8	14.8	 16
395	 18	196.5	26.4	 16
396	 18	99.5	18.6	 16
397	 18	64.5	15.0	 16
398	 18	60.3	8.3	 16
399	 18	64.5	11.6	 16
400	 18	81.3	12.1	 16
401	 18	89.5	15.6	 16
402	 18	169.8	19.9	 16
403	 18	146.5	19.8	 16
404	 18	355.5	57.6	 16
405	 18	67.0	12.1	 16
406	 18	70.0	10.2	 16
407	 18	111.3	22.1	 16
408	 18	65.0	12.1	 16
409	 18	65.8	11.6	 16
410	 18	69.3	22.1	 16
411	 18	87.8	43.7	 16
412	 18	105.5	18.2	 16
413	 18	93.0	17.1	 16
414	 18	113.3	16.8	 16
415	 18	62.8	8.8	 16
416	 18	73.0	12.0	 16
417	 18	60.0	10.3	 16
418	 18	89.5	13.3	 16
419	 18	57.5	12.0	 16
420	 18	74.0	7.5	 16
421	 18	87.3	13.0	 16
422	 18	180.5	18.0	 16
423	 18	171.8	23.1	 16
424	 18	152.3	22.0	 16
425	 18	100.0	12.2	 16
426	 18	209.8	18.5	 16
427	 18	109.0	21.3	 16
428	 18	78.0	13.3	 16
429	 18	68.8	15.1	 16
430	 18	200.0	26.7	 16
431	 18	238.3	29.9	 16
432	 18	166.0	45.8	 16
433	 18	63.5	14.7	 16
434	 18	106.3	18.0	 16
435	 18	92.3	13.9	 16
436	 18	100.3	16.2	 16
437	 18	97.0	16.2	 16
438	 18	100.3	15.4	 16
439	 18	60.3	10.1	 16
440	 18	94.3	20.9	 16
441	 18	95.5	17.2	 16
442	 18	188.0	25.4	 16
443	 18	287.5	24.5	 16
444	 18	124.0	16.6	 16
445	 18	88.5	15.7	 16
446	 18	104.5	16.3	 16
447	 18	79.8	14.5	 16
448	 18	88.5	12.4	 16
449	 18	65.0	11.7	 16
450	 18	65.3	11.5	 16
451	 18	93.0	13.1	 16
452	 18	179.8	27.1	 16
453	 18	103.3	16.0	 16
454	 18	78.0	12.1	 16
455	 18	88.3	14.5	 16
456	 18	74.3	12.7	 16
457	 18	55.8	12.4	 16
458	 18	74.0	12.8	 16
459	 18	81.0	19.6	 16
460	 18	107.5	18.7	 16
461	 18	81.3	15.3	 16
462	 18	135.0	22.2	 16
463	 18	144.3	20.0	 16
464	 18	207.8	37.1	 16
465	 18	237.8	54.7	 16
466	 18	67.8	9.1	 16
467	 18	254.3	39.2	 16
468	 18	105.8	17.2	 16
469	 18	64.0	8.3	 16
470	 18	119.8	19.4	 16
471	 18	80.3	15.8	 16
472	 18	101.0	16.7	 16
473	 18	65.3	11.0	 16
474	 18	97.3	12.7	 16
475	 18	380.8	52.8	 16
476	 18	89.5	16.1	 20
477	 18	59.0	10.8	 16
478	 18	183.8	29.9	 16
479	 18	263.0	43.2	 16
480	 18	122.8	15.5	 16
481	 18	101.0	26.2	 16
482	 18	367.8	52.2	 16
483	 18	142.0	22.9	 16
484	 18	94.3	54.8	 16
485	 18	181.0	23.9	 16
486	 18	81.5	11.0	 16
487	 18	263.0	49.1	 16
488	 18	59.3	11.9	 16
489	 18	103.8	42.9	 16
490	 18	113.3	23.9	 16
491	 18	74.8	12.1	 16
492	 18	56.3	11.1	 16
493	 18	110.5	19.8	 16
494	 18	882.8	178.7	 16
495	 18	246.3	22.3	 16
496	 18	129.3	19.4	 16
497	 18	82.3	12.0	 16
498	 18	193.3	19.0	 16
499	 18	96.3	20.6	 16
500	 18	79.5	14.3	 16
501	 18	83.0	15.3	 16
502	 18	76.0	11.7	 16
503	 18	101.0	11.8	 16
504	 18	76.3	18.7	 16
505	 18	56.5	7.7	 16
506	 18	60.8	11.9	 16
507	 18	52.8	8.7	 16
508	 18	55.3	10.7	 16
509	 18	73.8	19.2	 16
510	 18	95.8	18.8	 16
511	 18	177.8	22.8	 16
512	 18	61.3	7.4	 16
513	 18	64.3	11.3	 16
514	 18	66.8	12.6	 16
515	 18	230.5	47.2	 16
516	 18	87.0	16.1	 16
517	 18	69.5	9.3	 16
518	 18	116.3	141.9	 16
519	 18	60.3	9.8	 16
520	 18	72.5	15.0	 16
521	 18	69.8	16.5	 16
522	 18	86.0	18.9	 16
523	 18	192.0	22.0	 16
524	 18	61.8	15.7	 16
525	 18	76.5	14.1	 16
526	 18	74.0	23.5	 16
527	 18	61.3	11.1	 16
528	 18	132.0	18.2	 16
529	 18	61.3	10.4	 16
530	 18	64.3	9.9	 16
531	 18	77.8	15.0	 16
532	 18	71.0	13.0	 16
533	 18	88.8	18.9	 16
534	 18	125.8	15.7	 16
535	 18	67.5	13.3	 16
536	 18	62.0	8.3	 16
537	 18	57.5	12.4	 16
538	 18	64.3	9.1	 16
539	 18	70.5	13.8	 16
540	 18	148.3	19.4	 16
541	 18	322.5	51.1	 16
542	 18	214.5	32.0	 16
543	 18	110.5	16.5	 16
544	 18	64.0	10.6	 16
545	 18	135.0	21.8	 16
546	 18	185.0	24.3	 16
547	 18	157.5	19.1	 16
548	 18	110.0	15.6	 16
549	 18	116.5	16.2	 16
550	 18	336.3	45.9	 16
551	 18	109.8	16.5	 16
552	 18	139.3	13.1	 16
553	 18	96.3	16.1	 16
554	 18	128.5	27.6	 16
555	 18	150.3	18.8	 16
556	 18	140.8	23.5	 16
557	 18	59.5	9.4	 16
558	 18	99.0	14.8	 16
559	 18	961.5	102.4	 16
560	 18	78.5	17.7	 16
561	 18	59.5	12.8	 16
562	 18	69.0	10.4	 16
563	 18	190.5	28.0	 16
564	 18	355.3	50.1	 16
565	 18	69.0	9.9	 16
566	 18	83.5	12.9	 16
567	 18	87.0	6.3	 16
568	 18	71.8	13.7	 16
569	 18	106.5	17.2	 16
570	 18	64.5	9.5	 16
571	 18	63.8	13.3	 16
572	 18	68.3	11.6	 16
573	 18	167.0	27.6	 16
574	 18	138.0	18.6	 16
575	 18	616.3	55.6	 16
576	 18	310.5	47.9	 16
577	 18	127.5	20.0	 16
578	 18	78.3	13.1	 16
579	 18	90.8	14.3	 16
580	 18	691.8	85.1	 16
581	 18	235.3	56.4	 16
582	 18	207.5	24.2	 16
583	 18	71.3	11.3	 16
584	 18	450.3	79.0	 16
585	 18	291.5	27.0	 16
586	 18	157.0	24.7	 16
587	 18	72.0	16.5	 16
588	 18	60.3	10.2	 16
589	 18	116.3	14.9	 16
590	 18	162.8	28.7	 16
591	 18	82.5	19.6	 16
592	 18	83.0	14.1	 16
593	 18	75.8	12.9	 16
594	 18	77.5	74.8	 16
595	 18	95.0	15.1	 20
596	 18	569.0	40.7	 16
597	 18	192.3	25.4	 16
598	 18	74.3	13.7	 16
599	 18	111.0	19.0	 16
600	 18	120.3	22.2	 16
601	 18	582.0	58.2	 16
602	 18	992.0	71.6	 16
603	 18	151.3	21.6	 16
604	 18	186.5	34.3	 16
605	 18	108.0	18.2	 16
606	 18	118.5	17.1	 16
607	 18	73.0	14.1	 16
608	 18	124.8	13.1	 16
609	 18	88.3	15.5	 16
610	 18	62.5	10.3	 16
611	 18	125.5	16.6	 16
612	 18	62.3	15.8	 16
613	 18	58.0	9.2	 16
614	 18	67.8	13.1	 16
615	 18	245.8	28.9	 16
616	 18	197.8	44.8	 16
617	 18	133.3	18.7	 16
618	 18	212.3	47.6	 16
619	 18	84.3	14.9	 16
620	 18	415.3	56.5	 16
621	 18	121.5	28.9	 16
622	 18	480.0	30.2	 16
623	 18	117.3	20.5	 16
624	 18	213.8	27.9	 16
625	 18	389.3	41.4	 16
626	 18	81.8	15.7	 16
627	 18	83.3	11.6	 16
628	 18	257.5	23.7	 16
629	 18	167.0	21.0	 16
630	 18	132.5	19.9	 16
631	 18	95.5	24.9	 16
632	 18	68.3	23.1	 16
633	 18	96.0	16.0	 16
634	 18	91.5	14.2	 16
635	 18	111.3	11.9	 16
636	 18	70.3	12.7	 16
637	 18	68.8	9.8	 16
638	 18	95.3	29.9	 16
639	 18	399.8	55.9	 16
640	 18	125.5	17.3	 16
641	 18	85.5	15.3	 16
642	 18	250.5	62.0	 16
643	 18	167.8	24.8	 16
644	 18	76.8	15.3	 16
645	 18	118.3	22.5	 16
646	 18	96.3	19.4	 16
647	 18	160.5	22.3	 16
648	 18	168.8	25.5	 16
649	 18	162.5	23.1	 16
650	 18	115.5	20.2	 16
651	 18	58.5	10.3	 16
652	 18	89.5	18.5	 16
653	 18	117.8	16.6	 16
654	 18	115.3	18.2	 16
655	 18	64.5	15.0	 16
656	 18	56.5	8.5	 16
657	 18	176.0	20.9	 16
658	 18	60.3	10.5	 16
659	 18	120.3	19.1	 16
660	 18	64.0	10.1	 16
661	 18	73.0	11.2	 16
662	 18	88.5	11.8	 16
663	 18	81.3	12.1	 16
664	 18	81.0	13.9	 16
665	 18	88.5	15.5	 16
666	 18	117.5	22.7	 16
667	 18	82.3	22.3	 16
668	 18	53.0	7.2	 16
669	 18	73.3	10.9	 16
670	 18	93.8	19.2	 16
671	 18	748.0	99.5	 16
672	 18	603.0	120.4	 16
673	 18	75.8	14.6	 16
674	 18	140.5	21.7	 16
675	 18	429.0	44.9	 16
676	 18	117.8	12.2	 16
677	 18	791.8	87.3	 16
678	 18	103.5	19.8	 16
679	 18	99.0	14.3	 16
680	 18	92.3	12.9	 16
681	 18	137.0	18.4	 16
682	 18	102.5	19.0	 16
683	 18	96.0	15.9	 16
684	 18	140.3	16.8	 16
685	 18	147.8	26.5	 16
686	 18	122.5	12.3	 16
687	 18	203.3	23.5	 16
688	 18	428.3	63.4	 16
689	 18	71.0	9.2	 16
690	 18	114.0	14.9	 16
691	 18	83.8	14.8	 16
692	 18	126.8	21.4	 16
693	 18	167.8	27.0	 16
694	 18	83.3	11.3	 16
695	 18	82.8	20.3	 16
696	 18	853.3	81.5	 16
697	 18	150.0	15.1	 16
698	 18	134.5	17.7	 16
699	 18	70.0	11.7	 16
700	 18	61.5	12.5	 16
701	 18	93.3	18.9	 16
702	 18	268.3	89.1	 16
703	 18	91.3	17.3	 16
704	 18	209.3	31.7	 16
705	 18	180.3	26.4	 16
706	 18	115.5	17.0	 16
707	 18	146.0	20.6	 16
708	 18	69.5	9.0	 16
709	 18	107.3	17.6	 16
710	 18	814.8	87.9	 16
711	 18	7891.3	1150.0	 16
  0	 19	97.0	19.1	 16
  1	 19	106.5	15.7	 16
  2	 19	78.8	12.5	 16
  3	 19	307.3	78.2	 16
  4	 19	210.3	43.4	 16
  5	 19	148.3	23.6	 20
  6	 19	84.3	13.2	 16
  7	 19	91.8	22.2	 16
  8	 19	155.3	41.1	 16
  9	 19	70.5	9.5	 16
 10	 19	71.0	12.8	 16
 11	 19	208.8	49.4	 16
 12	 19	205.0	30.1	 16
 13	 19	144.0	26.7	 16
 14	 19	340.0	55.5	 16
 15	 19	265.5	33.4	 16
 16	 19	374.5	50.4	 16
 17	 19	274.8	40.7	 16
 18	 19	171.5	26.9	 16
 19	 19	151.8	20.0	 16
 20	 19	82.8	15.0	 16
 21	 19	116.0	18.7	 16
 22	 19	263.0	47.6	 16
 23	 19	485.0	126.5	 16
 24	 19	925.5	240.4	 16
 25	 19	137.5	30.0	 16
 26	 19	152.3	31.4	 16
 27	 19	438.5	115.5	 16
 28	 19	73.8	36.6	 16
 29	 19	53.8	9.2	 16
 30	 19	84.0	11.4	 16
 31	 19	305.0	78.5	 16
 32	 19	76.3	10.0	 16
 33	 19	103.3	18.6	 16
 34	 19	217.3	56.3	 16
 35	 19	217.3	33.8	 16
 36	 19	414.3	87.1	 16
 37	 19	181.8	22.2	 16
 38	 19	3088.5	672.9	 16
 39	 19	534.8	65.0	 16
 40	 19	162.3	25.5	 16
 41	 19	81.5	17.5	 16
 42	 19	71.5	8.9	 16
 43	 19	210.5	38.1	 16
 44	 19	609.3	125.3	 16
 45	 19	125.8	23.2	 16
 46	 19	224.0	39.4	 16
 47	 19	439.3	84.2	 16
 48	 19	214.8	32.7	 16
 49	 19	1391.8	311.7	 16
 50	 19	89.3	20.0	 16
 51	 19	222.0	35.2	 16
 52	 19	124.3	23.0	 16
 53	 19	285.3	48.2	 16
 54	 19	88.3	13.1	 16
 55	 19	572.8	156.4	 16
 56	 19	796.3	168.2	 16
 57	 19	130.8	19.3	 16
 58	 19	239.0	35.3	 16
 59	 19	632.5	112.0	 16
 60	 19	215.5	35.7	 16
 61	 19	408.3	77.0	 16
 62	 19	161.5	20.4	 16
 63	 19	684.3	94.1	 16
 64	 19	249.5	35.4	 16
 65	 19	161.3	20.2	 16
 66	 19	103.8	15.9	 16
 67	 19	80.8	15.2	 16
 68	 19	129.3	19.7	 16
 69	 19	297.0	41.4	 16
 70	 19	760.0	104.6	 16
 71	 19	918.0	102.7	 16
 72	 19	289.8	26.4	 16
 73	 19	368.8	51.5	 16
 74	 19	1241.0	279.2	 16
 75	 19	92.8	19.4	 16
 76	 19	87.0	12.6	 16
 77	 19	660.5	129.8	 16
 78	 19	117.0	19.8	 16
 79	 19	93.5	17.7	 16
 80	 19	81.0	10.2	 16
 81	 19	84.8	17.5	 16
 82	 19	117.8	24.1	 16
 83	 19	544.5	49.3	 16
 84	 19	130.0	25.3	 16
 85	 19	259.0	34.9	 16
 86	 19	197.8	29.6	 16
 87	 19	3609.5	343.6	 16
 88	 19	180.3	15.4	 16
 89	 19	115.8	19.6	 16
 90	 19	1430.5	166.0	 16
 91	 19	187.5	27.2	 16
 92	 19	74.0	15.6	 16
 93	 19	80.5	12.0	 16
 94	 19	143.8	23.3	 16
 95	 19	398.3	72.6	 16
 96	 19	1011.5	133.5	 16
 97	 19	120.8	19.4	 16
 98	 19	124.0	23.7	 16
 99	 19	108.8	41.2	 16
100	 19	145.0	32.4	 16
101	 19	146.0	23.1	 16
102	 19	667.5	58.8	 16
103	 19	337.5	34.5	 16
104	 19	270.0	45.1	 16
105	 19	319.3	59.7	 16
106	 19	342.3	95.8	 16
107	 19	313.3	41.4	 16
108	 19	79.8	12.3	 16
109	 19	110.3	17.0	 16
110	 19	106.0	19.4	 16
111	 19	297.3	38.2	 16
112	 19	326.0	40.7	 16
113	 19	1858.8	313.4	 16
114	 19	107.5	19.4	 16
115	 19	113.3	74.5	 16
116	 19	102.3	18.4	 16
117	 19	68.8	12.8	 16
118	 19	78.5	11.7	 16
119	 19	2162.0	316.5	 16
120	 19	83.3	10.7	 16
121	 19	66.3	12.4	 16
122	 19	105.0	34.9	 16
123	 19	97.5	10.8	 16
124	 19	101.0	18.4	 20
125	 19	121.8	21.9	 16
126	 19	266.3	44.1	 16
127	 19	577.0	60.5	 16
128	 19	150.3	22.6	 16
129	 19	131.8	24.2	 16
130	 19	102.5	16.7	 16
131	 19	515.3	62.6	 16
132	 19	177.3	20.9	 16
133	 19	74.5	14.3	 16
134	 19	180.3	29.1	 16
135	 19	85.3	13.5	 16
136	 19	80.5	12.1	 16
137	 19	616.5	147.1	 16
138	 19	136.8	34.3	 16
139	 19	269.0	40.8	 16
140	 19	101.5	19.0	 16
141	 19	1024.5	217.8	 16
142	 19	98.3	20.9	 16
143	 19	363.5	56.8	 16
144	 19	57.0	8.9	 16
145	 19	428.5	128.2	 16
146	 19	148.0	32.1	 16
147	 19	103.8	27.9	 16
148	 19	81.5	14.9	 16
149	 19	97.8	15.4	 16
150	 19	190.5	27.9	 16
151	 19	225.0	43.9	 16
152	 19	132.3	22.4	 16
153	 19	406.3	119.6	 16
154	 19	1225.3	250.2	 16
155	 19	302.3	58.3	 16
156	 19	110.0	18.1	 16
157	 19	383.0	41.1	 16
158	 19	523.0	83.4	 16
159	 19	161.5	18.3	 16
160	 19	571.8	68.4	 16
161	 19	97.5	21.0	 16
162	 19	207.3	25.7	 16
163	 19	343.0	51.9	 16
164	 19	168.3	19.6	 16
165	 19	90.0	13.9	 16
166	 19	155.3	13.3	 16
167	 19	104.0	14.1	 16
168	 19	527.8	110.8	 16
169	 19	81.5	14.8	 16
170	 19	515.0	117.1	 16
171	 19	165.0	23.0	 16
172	 19	185.0	35.4	 16
173	 19	652.0	58.7	 16
174	 19	194.5	36.3	 16
175	 19	83.0	13.7	 16
176	 19	157.0	26.4	 16
177	 19	75.8	9.2	 16
178	 19	240.8	25.9	 16
179	 19	175.8	26.6	 16
180	 19	258.3	24.2	 16
181	 19	310.3	56.6	 16
182	 19	76.8	10.0	 16
183	 19	593.5	104.0	 16
184	 19	119.8	19.6	 16
185	 19	218.3	37.7	 16
186	 19	232.8	26.0	 16
187	 19	444.0	76.7	 16
188	 19	89.0	15.5	 16
189	 19	71.0	13.7	 16
190	 19	163.0	30.8	 16
191	 19	479.3	103.7	 16
192	 19	296.0	37.0	 16
193	 19	241.0	44.0	 16
194	 19	164.0	41.1	 16
195	 19	843.0	212.7	 16
196	 19	81.3	19.0	 16
197	 19	109.3	21.6	 16
198	 19	123.8	46.5	 16
199	 19	408.3	130.7	 16
200	 19	567.0	151.2	 16
201	 19	694.0	173.8	 16
202	 19	189.8	24.9	 16
203	 19	161.8	17.6	 16
204	 19	181.8	22.0	 16
205	 19	171.0	24.8	 16
206	 19	80.0	9.1	 16
207	 19	96.8	15.4	 16
208	 19	960.5	67.2	 16
209	 19	73.0	11.5	 16
210	 19	70.0	14.4	 16
211	 19	83.8	13.4	 16
212	 19	52.3	12.8	 16
213	 19	104.0	17.2	 16
214	 19	102.0	20.3	 16
215	 19	1697.0	252.4	 16
216	 19	105.5	17.5	 16
217	 19	924.0	183.2	 16
218	 19	150.5	20.0	 16
219	 19	87.8	14.0	 16
220	 19	88.8	16.3	 16
221	 19	102.3	18.9	 16
222	 19	543.0	158.0	 16
223	 19	70.3	30.6	 16
224	 19	467.0	120.9	 16
225	 19	66.8	16.5	 16
226	 19	69.8	13.7	 16
227	 19	251.3	47.7	 16
228	 19	112.0	19.0	 16
229	 19	3298.8	255.8	 16
230	 19	256.0	37.0	 16
231	 19	687.0	87.1	 16
232	 19	77.0	8.8	 16
233	 19	72.0	14.5	 16
234	 19	62.0	9.2	 16
235	 19	199.5	27.8	 16
236	 19	296.0	55.9	 16
237	 19	85.5	10.2	 16
238	 19	301.3	51.6	 16
239	 19	85.3	14.7	 16
240	 19	117.0	20.5	 16
241	 19	123.8	17.6	 16
242	 19	80.0	15.4	 16
243	 19	91.3	19.4	 20
244	 19	149.0	26.1	 16
245	 19	95.8	15.2	 16
246	 19	152.3	38.7	 16
247	 19	62.3	12.4	 16
248	 19	2400.5	719.3	 16
249	 19	83.0	12.8	 16
250	 19	61.5	10.6	 16
251	 19	72.5	13.5	 16
252	 19	77.3	10.6	 16
253	 19	56.3	9.9	 16
254	 19	99.3	17.1	 16
255	 19	77.0	13.6	 16
256	 19	80.3	12.0	 16
257	 19	126.8	22.3	 16
258	 19	66.8	13.6	 16
259	 19	450.0	81.4	 16
260	 19	194.0	21.6	 16
261	 19	376.5	48.8	 16
262	 19	537.0	86.4	 16
263	 19	76.5	11.4	 16
264	 19	186.5	25.4	 16
265	 19	95.8	21.5	 16
266	 19	210.3	40.7	 16
267	 19	178.3	35.2	 16
268	 19	122.3	16.3	 16
269	 19	196.0	22.0	 16
270	 19	241.3	37.1	 16
271	 19	1506.8	347.1	 16
272	 19	982.8	194.1	 16
273	 19	92.3	12.8	 16
274	 19	157.5	24.6	 16
275	 19	162.3	27.7	 16
276	 19	178.0	23.9	 16
277	 19	60.3	8.4	 16
278	 19	342.0	56.4	 16
279	 19	121.0	18.0	 16
280	 19	290.5	72.9	 16
281	 19	59.0	10.9	 16
282	 19	74.3	15.8	 16
283	 19	79.0	16.9	 16
284	 19	79.5	15.1	 16
285	 19	78.0	14.7	 16
286	 19	71.8	11.2	 16
287	 19	276.5	57.3	 16
288	 19	67.8	21.0	 16
289	 19	225.8	42.4	 16
290	 19	655.3	83.0	 16
291	 19	421.0	67.1	 16
292	 19	74.3	14.8	 16
293	 19	262.8	59.0	 16
294	 19	242.0	47.1	 16
295	 19	91.0	13.7	 16
296	 19	98.5	26.1	 16
297	 19	76.3	16.4	 16
298	 19	68.0	10.1	 16
299	 19	117.3	22.2	 16
300	 19	70.3	11.1	 16
301	 19	89.0	18.9	 16
302	 19	202.8	25.9	 16
303	 19	327.8	42.6	 16
304	 19	544.0	116.3	 16
305	 19	86.3	9.6	 16
306	 19	202.3	35.2	 16
307	 19	222.0	54.7	 16
308	 19	130.8	11.4	 16
309	 19	97.8	22.2	 16
310	 19	325.8	67.8	 16
311	 19	82.8	14.8	 16
312	 19	1125.3	190.5	 16
313	 19	63.0	9.4	 16
314	 19	140.3	28.7	 16
315	 19	251.3	40.8	 16
316	 19	73.3	16.0	 16
317	 19	441.3	73.5	 16
318	 19	219.3	46.9	 16
319	 19	127.5	23.9	 16
320	 19	486.3	68.1	 16
321	 19	421.3	45.7	 16
322	 19	82.3	10.8	 16
323	 19	92.3	13.1	 16
324	 19	113.3	20.8	 16
325	 19	58.0	10.8	 16
326	 19	946.3	100.8	 16
327	 19	124.5	46.9	 16
328	 19	71.0	26.2	 16
329	 19	61.3	11.0	 16
330	 19	66.5	10.0	 16
331	 19	113.5	19.3	 16
332	 19	80.0	13.6	 16
333	 19	581.3	102.0	 16
334	 19	132.5	21.1	 16
335	 19	548.8	42.1	 16
336	 19	66.0	13.5	 16
337	 19	74.5	10.8	 16
338	 19	227.0	25.4	 16
339	 19	84.0	11.7	 16
340	 19	82.8	16.3	 16
341	 19	55.8	9.7	 16
342	 19	58.5	10.0	 16
343	 19	62.3	13.9	 16
344	 19	91.5	52.6	 16
345	 19	65.5	12.8	 16
346	 19	59.3	9.7	 16
347	 19	65.8	10.9	 16
348	 19	143.0	22.9	 16
349	 19	352.3	48.1	 16
350	 19	76.3	10.5	 16
351	 19	234.3	34.6	 16
352	 19	77.0	7.5	 16
353	 19	235.0	37.8	 16
354	 19	103.0	15.7	 16
355	 19	174.0	27.4	 16
356	 19	168.0	30.0	 16
357	 19	660.3	80.1	 16
358	 19	6787.5	941.3	 16
359	 19	232.8	27.1	 16
360	 19	186.3	34.2	 16
361	 19	756.8	177.4	 20
362	 19	140.3	22.8	 16
363	 19	124.8	23.1	 16
364	 19	262.3	62.3	 16
365	 19	112.0	18.7	 16
366	 19	170.8	28.1	 16
367	 19	78.0	12.0	 16
368	 19	82.5	31.9	 16
369	 19	174.0	25.8	 16
370	 19	74.3	14.7	 16
371	 19	111.5	14.5	 16
372	 19	116.0	21.0	 16
373	 19	441.8	73.4	 16
374	 19	119.0	20.7	 16
375	 19	72.3	11.7	 16
376	 19	189.8	28.3	 16
377	 19	342.8	51.0	 16
378	 19	87.3	13.3	 16
379	 19	90.3	15.3	 16
380	 19	4594.3	862.8	 16
381	 19	575.0	111.0	 16
382	 19	92.3	13.4	 16
383	 19	107.3	16.2	 16
384	 19	1262.8	232.6	 16
385	 19	167.0	27.5	 16
386	 19	91.5	18.3	 16
387	 19	359.8	41.1	 16
388	 19	107.3	18.7	 16
389	 19	64.0	12.6	 16
390	 19	126.8	27.6	 16
391	 19	94.8	16.0	 16
392	 19	118.5	17.6	 16
393	 19	379.8	58.7	 16
394	 19	75.5	12.4	 16
395	 19	456.8	78.3	 16
396	 19	124.8	22.2	 16
397	 19	64.5	12.3	 16
398	 19	85.3	15.5	 16
399	 19	205.8	30.2	 16
400	 19	1331.0	252.9	 16
401	 19	67.0	13.4	 16
402	 19	412.3	77.6	 16
403	 19	180.0	32.0	 16
404	 19	103.8	16.0	 16
405	 19	81.0	17.3	 16
406	 19	79.3	12.5	 16
407	 19	141.3	25.4	 16
408	 19	1800.8	285.4	 16
409	 19	5514.5	885.8	 16
410	 19	83.3	23.1	 16
411	 19	88.0	10.7	 16
412	 19	176.0	21.2	 16
413	 19	83.0	7.5	 16
414	 19	158.5	27.8	 16
415	 19	98.5	13.6	 16
416	 19	145.5	35.2	 16
417	 19	73.5	8.6	 16
418	 19	1428.5	162.6	 16
419	 19	70.8	12.1	 16
420	 19	319.5	40.4	 16
421	 19	74.3	13.3	 16
422	 19	156.3	17.4	 16
423	 19	697.3	48.0	 16
424	 19	405.0	55.8	 16
425	 19	530.8	61.1	 16
426	 19	116.3	13.8	 16
427	 19	194.5	73.7	 16
428	 19	311.0	59.1	 16
429	 19	181.0	22.9	 16
430	 19	69.3	8.9	 16
431	 19	209.5	30.8	 16
432	 19	183.5	21.1	 16
433	 19	104.0	14.2	 16
434	 19	2132.3	355.6	 16
435	 19	75.3	17.1	 16
436	 19	184.0	31.8	 16
437	 19	214.3	36.0	 16
438	 19	65.5	9.4	 16
439	 19	137.0	134.7	 16
440	 19	96.0	18.0	 16
441	 19	278.3	34.7	 16
442	 19	117.8	18.7	 16
443	 19	185.5	28.0	 16
444	 19	430.3	49.0	 16
445	 19	193.0	40.8	 16
446	 19	206.3	24.8	 16
447	 19	85.3	14.8	 16
448	 19	97.5	18.3	 16
449	 19	111.5	17.6	 16
450	 19	67.3	13.2	 16
451	 19	122.8	18.0	 16
452	 19	105.3	14.3	 16
453	 19	79.0	13.6	 16
454	 19	75.8	14.6	 16
455	 19	85.5	17.2	 16
456	 19	145.0	15.6	 16
457	 19	71.5	10.7	 16
458	 19	684.3	155.8	 16
459	 19	96.8	17.6	 16
460	 19	99.0	44.5	 16
461	 19	52.3	7.1	 16
462	 19	98.3	26.5	 16
463	 19	119.3	57.2	 16
464	 19	65.8	12.5	 16
465	 19	68.0	16.5	 16
466	 19	56.3	7.0	 16
467	 19	55.8	10.4	 16
468	 19	688.5	102.5	 16
469	 19	122.5	22.9	 16
470	 19	1141.3	131.8	 16
471	 19	714.5	98.6	 16
472	 19	105.0	15.1	 16
473	 19	126.8	17.6	 16
474	 19	72.5	12.4	 16
475	 19	211.5	57.5	 16
476	 19	325.0	60.7	 16
477	 19	56.0	12.1	 16
478	 19	130.0	19.2	 16
479	 19	102.0	17.9	 16
480	 19	139.3	29.2	 20
481	 19	81.8	17.9	 16
482	 19	96.0	12.9	 16
483	 19	68.8	15.0	 16
484	 19	85.5	22.1	 16
485	 19	652.8	77.0	 16
486	 19	589.0	59.6	 16
487	 19	345.5	33.2	 16
488	 19	990.8	126.4	 16
489	 19	160.3	23.5	 16
490	 19	121.5	17.5	 16
491	 19	139.8	15.2	 16
492	 19	96.8	13.9	 16
493	 19	108.0	14.7	 16
494	 19	107.5	13.8	 16
495	 19	104.3	12.0	 16
496	 19	2191.3	492.5	 16
497	 19	365.3	66.1	 16
498	 19	1015.3	236.3	 16
499	 19	81.3	12.8	 16
500	 19	58.0	11.9	 16
501	 19	88.8	15.7	 16
502	 19	103.3	13.3	 16
503	 19	334.8	74.0	 16
504	 19	97.3	19.7	 16
505	 19	95.3	14.4	 16
506	 19	116.5	21.0	 16
507	 19	328.5	60.0	 16
508	 19	108.3	22.0	 16
509	 19	1746.5	493.5	 16
510	 19	287.5	49.7	 16
511	 19	133.8	19.8	 16
512	 19	65.0	10.6	 16
513	 19	61.5	18.6	 16
514	 19	504.5	96.7	 16
515	 19	83.5	15.3	 16
516	 19	91.8	27.3	 16
517	 19	564.3	107.9	 16
518	 19	59.3	10.3	 16
519	 19	59.8	10.7	 16
520	 19	69.0	8.5	 16
521	 19	60.3	10.4	 16
522	 19	65.0	7.8	 16
523	 19	812.5	128.8	 16
524	 19	97.8	17.2	 16
525	 19	162.3	29.7	 16
526	 19	388.0	97.9	 16
527	 19	122.8	21.0	 16
528	 19	133.0	23.7	 16
529	 19	326.5	45.8	 16
530	 19	160.5	30.8	 16
531	 19	793.8	173.5	 16
532	 19	226.5	46.2	 16
533	 19	156.8	21.1	 16
534	 19	94.8	23.2	 16
535	 19	188.3	29.3	 16
536	 19	65.0	11.1	 16
537	 19	115.0	20.4	 16
538	 19	69.3	12.5	 16
539	 19	314.3	36.0	 16
540	 19	285.0	37.1	 16
541	 19	87.5	14.4	 16
542	 19	121.0	18.5	 16
543	 19	346.5	60.1	 16
544	 19	90.5	14.3	 16
545	 19	262.5	41.7	 16
546	 19	97.0	27.5	 16
547	 19	73.3	12.8	 16
548	 19	158.3	32.5	 16
549	 19	267.5	56.3	 16
550	 19	76.5	11.0	 16
551	 19	90.0	20.4	 16
552	 19	73.3	26.6	 16
553	 19	124.3	22.9	 16
554	 19	72.5	13.5	 16
555	 19	67.8	13.8	 16
556	 19	113.5	18.1	 16
557	 19	467.0	108.2	 16
558	 19	79.0	15.0	 16
559	 19	1813.0	160.1	 16
560	 19	233.5	18.7	 16
561	 19	66.3	8.8	 16
562	 19	241.0	33.8	 16
563	 19	348.8	55.0	 16
564	 19	83.5	18.3	 16
565	 19	58.0	10.5	 16
566	 19	1345.3	214.3	 16
567	 19	100.0	15.4	 16
568	 19	745.8	72.9	 16
569	 19	93.3	12.3	 16
570	 19	59.8	12.2	 16
571	 19	95.8	11.7	 16
572	 19	124.3	19.1	 16
573	 19	83.3	9.8	 16
574	 19	182.3	26.8	 16
575	 19	116.0	20.9	 16
576	 19	122.3	27.5	 16
577	 19	78.5	16.5	 16
578	 19	118.5	18.4	 16
579	 19	328.3	41.8	 16
580	 19	582.3	73.0	 16
581	 19	503.0	61.4	 16
582	 19	106.5	16.4	 16
583	 19	278.5	47.5	 16
584	 19	140.3	20.8	 16
585	 19	109.5	12.1	 16
586	 19	880.0	188.5	 16
587	 19	2284.8	492.5	 16
588	 19	274.0	57.1	 16
589	 19	68.3	12.0	 16
590	 19	156.3	24.1	 16
591	 19	239.0	38.3	 16
592	 19	125.8	20.6	 16
593	 19	254.8	42.1	 16
594	 19	66.5	11.0	 16
595	 19	74.3	9.0	 16
596	 19	466.5	92.9	 16
597	 19	2282.5	473.3	 16
598	 19	76.3	10.2	 20
599	 19	135.0	18.1	 16
600	 19	120.3	17.6	 16
601	 19	109.5	30.1	 16
602	 19	349.0	45.1	 16
603	 19	202.0	32.4	 16
604	 19	107.3	20.4	 16
605	 19	123.8	18.9	 16
606	 19	106.5	14.4	 16
607	 19	363.0	31.2	 16
608	 19	472.5	54.0	 16
609	 19	98.0	17.3	 16
610	 19	93.3	16.9	 16
611	 19	83.3	13.9	 16
612	 19	74.0	17.1	 16
613	 19	116.8	26.1	 16
614	 19	363.3	49.5	 16
615	 19	1016.0	141.7	 16
616	 19	554.8	49.3	 16
617	 19	2153.8	365.2	 16
618	 19	151.8	26.0	 16
619	 19	84.3	11.4	 16
620	 19	63.0	13.9	 16
621	 19	89.3	17.8	 16
622	 19	399.5	65.6	 16
623	 19	131.5	26.6	 16
624	 19	204.5	26.2	 16
625	 19	144.3	20.6	 16
626	 19	244.5	54.9	 16
627	 19	64.3	61.0	 16
628	 19	65.3	11.8	 16
629	 19	182.3	15.8	 16
630	 19	91.3	13.9	 16
631	 19	92.0	12.5	 16
632	 19	117.0	14.8	 16
633	 19	478.5	42.5	 16
634	 19	532.5	44.0	 16
635	 19	528.3	71.2	 16
636	 19	146.8	27.0	 16
637	 19	90.3	11.8	 16
638	 19	80.5	12.2	 16
639	 19	175.0	17.5	 16
640	 19	205.8	32.5	 16
641	 19	1143.8	120.4	 16
642	 19	525.5	57.8	 16
643	 19	442.0	53.6	 16
644	 19	208.8	23.7	 16
645	 19	155.0	18.1	 16
646	 19	157.0	29.8	 16
647	 19	288.0	38.1	 16
648	 19	693.5	130.9	 16
649	 19	182.5	29.4	 16
650	 19	217.3	31.0	 16
651	 19	238.5	34.2	 16
652	 19	116.5	24.1	 16
653	 19	300.3	232.3	 16
654	 19	401.5	57.5	 16
655	 19	117.3	17.8	 16
656	 19	81.0	38.9	 16
657	 19	124.0	18.0	 16
658	 19	80.8	22.7	 16
659	 19	73.5	13.2	 16
660	 19	172.0	26.5	 16
661	 19	129.3	21.9	 16
662	 19	144.0	19.1	 16
663	 19	68.0	12.4	 16
664	 19	56.5	9.2	 16
665	 19	66.0	15.0	 16
666	 19	292.5	30.2	 16
667	 19	93.3	14.8	 16
668	 19	55.8	12.6	 16
669	 19	405.0	73.2	 16
670	 19	103.0	23.2	 16
671	 19	150.5	16.1	 16
672	 19	65.3	15.1	 16
673	 19	84.8	46.2	 16
674	 19	102.0	18.1	 16
675	 19	86.5	14.9	 16
676	 19	380.5	51.4	 16
677	 19	188.0	23.6	 16
678	 19	64.0	12.9	 16
679	 19	63.5	13.4	 16
680	 19	62.3	10.2	 16
681	 19	66.0	16.0	 16
682	 19	69.5	10.3	 16
683	 19	1147.0	115.3	 16
684	 19	203.5	19.8	 16
685	 19	226.8	40.1	 16
686	 19	78.8	15.9	 16
687	 19	81.8	14.6	 16
688	 19	161.3	29.2	 16
689	 19	237.5	33.4	 16
690	 19	247.5	62.4	 16
691	 19	66.8	13.1	 16
692	 19	310.5	44.3	 16
693	 19	291.3	33.5	 16
694	 19	150.3	18.7	 16
695	 19	238.8	34.1	 16
696	 19	1777.5	362.9	 16
697	 19	68.5	15.6	 16
698	 19	66.5	10.4	 16
699	 19	113.0	20.9	 16
700	 19	114.8	11.9	 16
701	 19	69.0	11.9	 16
702	 19	87.8	15.5	 16
703	 19	84.8	12.6	 16
704	 19	1635.3	190.7	 16
705	 19	69.0	14.0	 16
706	 19	78.0	40.2	 16
707	 19	228.8	26.6	 16
708	 19	314.5	30.3	 16
709	 19	367.5	44.7	 16
710	 19	233.0	37.7	 16
711	 19	107.8	24.5	 16
  0	 20	4182.3	854.4	 16
  1	 20	135.5	27.6	 16
  2	 20	88.5	9.8	 16
  3	 20	162.5	22.3	 16
  4	 20	373.8	35.9	 16
  5	 20	94.0	17.2	 16
  6	 20	88.0	16.4	 16
  7	 20	85.3	14.3	 16
  8	 20	94.3	20.0	 20
  9	 20	66.0	12.2	 16
 10	 20	78.0	39.0	 16
 11	 20	98.3	30.3	 16
 12	 20	94.8	12.8	 16
 13	 20	122.8	17.6	 16
 14	 20	192.3	34.3	 16
 15	 20	201.5	34.8	 16
 16	 20	174.5	21.0	 16
 17	 20	211.3	28.4	 16
 18	 20	313.3	34.4	 16
 19	 20	190.0	28.2	 16
 20	 20	151.3	23.6	 16
 21	 20	123.5	28.6	 16
 22	 20	127.8	28.5	 16
 23	 20	141.3	22.6	 16
 24	 20	216.5	43.6	 16
 25	 20	174.0	31.3	 16
 26	 20	81.0	14.2	 16
 27	 20	114.3	22.1	 16
 28	 20	86.0	15.7	 16
 29	 20	57.8	10.3	 16
 30	 20	80.3	13.9	 16
 31	 20	179.3	24.3	 16
 32	 20	84.5	16.6	 16
 33	 20	91.3	40.6	 16
 34	 20	113.0	18.2	 16
 35	 20	493.5	63.8	 16
 36	 20	82.5	14.6	 16
 37	 20	101.0	18.9	 16
 38	 20	266.8	33.9	 16
 39	 20	195.0	20.4	 16
 40	 20	159.3	17.0	 16
 41	 20	77.5	16.9	 16
 42	 20	74.8	12.1	 16
 43	 20	86.5	13.3	 16
 44	 20	157.5	19.3	 16
 45	 20	92.0	18.3	 16
 46	 20	86.5	12.3	 16
 47	 20	103.3	18.0	 16
 48	 20	276.3	39.9	 16
 49	 20	309.3	78.4	 16
 50	 20	83.0	15.6	 16
 51	 20	162.8	28.8	 16
 52	 20	102.0	20.7	 16
 53	 20	332.5	26.8	 16
 54	 20	115.8	23.1	 16
 55	 20	266.3	29.4	 16
 56	 20	204.8	96.4	 16
 57	 20	142.0	18.7	 16
 58	 20	211.3	19.7	 16
 59	 20	309.0	48.0	 16
 60	 20	462.0	79.4	 16
 61	 20	79.0	9.5	 16
 62	 20	251.8	23.0	 16
 63	 20	405.3	67.0	 16
 64	 20	170.8	23.4	 16
 65	 20	130.5	21.6	 16
 66	 20	74.0	13.0	 16
 67	 20	68.5	16.7	 16
 68	 20	97.8	18.6	 16
 69	 20	180.0	34.6	 16
 70	 20	312.5	42.3	 16
 71	 20	218.5	40.5	 16
 72	 20	128.3	19.8	 16
 73	 20	315.3	47.0	 16
 74	 20	197.0	34.7	 16
 75	 20	103.5	13.5	 16
 76	 20	114.3	17.6	 16
 77	 20	324.0	38.3	 16
 78	 20	171.8	19.9	 16
 79	 20	82.3	13.9	 16
 80	 20	75.8	11.8	 16
 81	 20	62.0	8.9	 16
 82	 20	72.8	11.9	 16
 83	 20	357.3	148.5	 16
 84	 20	165.8	21.3	 16
 85	 20	140.8	19.5	 16
 86	 20	81.3	20.1	 16
 87	 20	639.8	88.3	 16
 88	 20	121.3	16.5	 16
 89	 20	115.0	20.7	 16
 90	 20	308.0	42.7	 16
 91	 20	139.8	12.3	 16
 92	 20	83.0	10.7	 16
 93	 20	74.8	13.7	 16
 94	 20	98.3	24.0	 16
 95	 20	89.3	17.4	 16
 96	 20	310.3	46.6	 16
 97	 20	89.5	15.7	 16
 98	 20	227.3	29.7	 16
 99	 20	153.3	27.1	 16
100	 20	134.0	25.5	 16
101	 20	117.0	19.1	 16
102	 20	995.5	78.4	 16
103	 20	593.0	63.2	 16
104	 20	365.3	41.2	 16
105	 20	146.3	16.4	 16
106	 20	97.0	18.5	 16
107	 20	86.0	17.8	 16
108	 20	63.0	9.4	 16
109	 20	98.5	11.9	 16
110	 20	81.8	12.6	 16
111	 20	94.3	14.7	 16
112	 20	107.3	16.4	 16
113	 20	276.5	40.8	 16
114	 20	77.8	9.5	 16
115	 20	80.3	16.7	 16
116	 20	61.8	9.2	 16
117	 20	69.0	12.6	 16
118	 20	68.3	12.7	 16
119	 20	239.8	37.2	 16
120	 20	81.3	11.7	 16
121	 20	67.3	9.3	 16
122	 20	88.0	35.6	 16
123	 20	111.0	16.4	 16
124	 20	84.8	15.0	 16
125	 20	92.0	15.6	 16
126	 20	1088.0	126.2	 16
127	 20	968.5	71.3	 20
128	 20	246.3	37.8	 16
129	 20	85.3	11.5	 16
130	 20	67.3	14.7	 16
131	 20	321.0	34.9	 16
132	 20	112.5	22.0	 16
133	 20	61.0	10.4	 16
134	 20	78.3	13.5	 16
135	 20	69.0	12.8	 16
136	 20	79.8	17.0	 16
137	 20	107.0	17.5	 16
138	 20	244.3	29.0	 16
139	 20	118.0	20.4	 16
140	 20	177.3	23.6	 16
141	 20	197.0	35.6	 16
142	 20	72.5	12.9	 16
143	 20	111.3	19.5	 16
144	 20	75.3	15.7	 16
145	 20	101.5	20.2	 16
146	 20	64.0	10.7	 16
147	 20	69.8	12.2	 16
148	 20	64.5	8.5	 16
149	 20	85.5	16.0	 16
150	 20	161.8	29.9	 16
151	 20	192.0	31.2	 16
152	 20	86.8	15.9	 16
153	 20	118.3	19.3	 16
154	 20	226.8	55.0	 16
155	 20	162.0	22.9	 16
156	 20	129.0	20.1	 16
157	 20	158.8	26.1	 16
158	 20	86.8	13.5	 16
159	 20	131.5	13.3	 16
160	 20	241.8	25.3	 16
161	 20	90.0	12.8	 16
162	 20	295.8	36.8	 16
163	 20	830.8	80.9	 16
164	 20	132.5	17.5	 16
165	 20	83.5	11.5	 16
166	 20	171.0	18.8	 16
167	 20	77.3	13.6	 16
168	 20	216.8	23.9	 16
169	 20	81.5	17.0	 16
170	 20	119.5	14.9	 16
171	 20	645.8	63.7	 16
172	 20	128.3	16.4	 16
173	 20	372.3	66.6	 16
174	 20	120.0	15.7	 16
175	 20	66.5	16.7	 16
176	 20	77.5	18.5	 16
177	 20	59.0	11.6	 16
178	 20	170.5	28.9	 16
179	 20	194.0	29.5	 16
180	 20	165.0	28.4	 16
181	 20	99.5	18.3	 16
182	 20	69.3	15.5	 16
183	 20	148.3	19.6	 16
184	 20	100.3	19.8	 16
185	 20	65.0	8.4	 16
186	 20	145.5	103.3	 16
187	 20	210.3	53.2	 16
188	 20	85.3	15.5	 16
189	 20	67.5	167.0	 16
190	 20	75.3	14.1	 16
191	 20	82.5	13.1	 16
192	 20	112.8	16.0	 16
193	 20	128.0	13.2	 16
194	 20	97.5	13.6	 16
195	 20	170.8	27.0	 16
196	 20	70.8	15.4	 16
197	 20	142.8	24.6	 16
198	 20	153.0	14.3	 16
199	 20	196.3	25.9	 16
200	 20	184.3	36.5	 16
201	 20	495.3	55.4	 16
202	 20	243.5	30.5	 16
203	 20	99.8	18.7	 16
204	 20	91.8	24.8	 16
205	 20	102.0	17.1	 16
206	 20	69.8	16.5	 16
207	 20	87.0	12.9	 16
208	 20	256.5	23.2	 16
209	 20	69.3	9.5	 16
210	 20	81.3	30.2	 16
211	 20	84.0	10.9	 16
212	 20	67.3	11.5	 16
213	 20	82.8	13.7	 16
214	 20	83.0	19.5	 16
215	 20	139.5	27.0	 16
216	 20	75.8	22.9	 16
217	 20	92.3	12.4	 16
218	 20	93.5	24.5	 16
219	 20	83.0	12.0	 16
220	 20	72.0	15.0	 16
221	 20	135.3	22.5	 16
222	 20	92.3	17.4	 16
223	 20	65.5	13.1	 16
224	 20	104.3	29.1	 16
225	 20	52.3	9.2	 16
226	 20	67.8	13.5	 16
227	 20	230.5	30.3	 16
228	 20	106.3	15.1	 16
229	 20	343.3	34.9	 16
230	 20	85.8	16.2	 16
231	 20	90.0	17.0	 16
232	 20	70.0	11.8	 16
233	 20	73.0	10.2	 16
234	 20	70.5	10.3	 16
235	 20	166.0	21.9	 16
236	 20	61.0	10.2	 16
237	 20	77.8	14.8	 16
238	 20	638.0	48.4	 16
239	 20	85.0	17.0	 16
240	 20	70.5	11.9	 16
241	 20	77.5	16.5	 16
242	 20	63.3	12.0	 16
243	 20	90.8	12.4	 16
244	 20	147.3	21.6	 16
245	 20	69.3	10.4	 16
246	 20	104.3	17.2	 20
247	 20	68.0	14.7	 16
248	 20	629.3	203.3	 16
249	 20	66.0	9.8	 16
250	 20	61.0	12.1	 16
251	 20	73.5	14.7	 16
252	 20	71.5	14.8	 16
253	 20	56.3	9.1	 16
254	 20	70.5	10.3	 16
255	 20	66.3	38.9	 16
256	 20	74.5	13.1	 16
257	 20	73.5	14.9	 16
258	 20	65.0	13.4	 16
259	 20	117.8	19.3	 16
260	 20	139.0	16.5	 16
261	 20	275.8	34.2	 16
262	 20	199.3	35.0	 16
263	 20	63.3	12.4	 16
264	 20	85.3	14.0	 16
265	 20	105.0	20.6	 16
266	 20	111.3	12.6	 16
267	 20	133.5	21.7	 16
268	 20	130.5	18.2	 16
269	 20	87.3	16.1	 16
270	 20	167.3	26.3	 16
271	 20	507.8	113.5	 16
272	 20	536.8	80.9	 16
273	 20	76.3	101.6	 16
274	 20	79.3	27.0	 16
275	 20	142.5	20.9	 16
276	 20	145.5	32.4	 16
277	 20	77.8	15.2	 16
278	 20	82.5	14.9	 16
279	 20	97.8	19.0	 16
280	 20	110.8	23.7	 16
281	 20	64.5	12.9	 16
282	 20	50.3	8.7	 16
283	 20	75.3	14.9	 16
284	 20	65.3	12.4	 16
285	 20	76.0	20.0	 16
286	 20	69.3	8.1	 16
287	 20	114.3	19.7	 16
288	 20	79.0	20.8	 16
289	 20	87.3	17.5	 16
290	 20	235.5	30.0	 16
291	 20	117.0	23.1	 16
292	 20	95.8	34.5	 16
293	 20	115.0	18.4	 16
294	 20	139.8	19.7	 16
295	 20	76.5	10.2	 16
296	 20	76.3	14.2	 16
297	 20	68.5	7.8	 16
298	 20	98.8	21.9	 16
299	 20	82.3	12.7	 16
300	 20	76.5	14.0	 16
301	 20	75.0	12.7	 16
302	 20	104.8	18.8	 16
303	 20	237.8	21.2	 16
304	 20	215.0	38.4	 16
305	 20	127.5	21.7	 16
306	 20	127.8	14.5	 16
307	 20	84.3	17.3	 16
308	 20	76.3	11.9	 16
309	 20	82.0	10.3	 16
310	 20	76.8	12.7	 16
311	 20	77.8	20.7	 16
312	 20	211.5	31.3	 16
313	 20	66.0	12.3	 16
314	 20	86.3	10.9	 16
315	 20	95.8	13.7	 16
316	 20	68.8	11.8	 16
317	 20	100.3	15.8	 16
318	 20	103.3	17.0	 16
319	 20	73.5	16.5	 16
320	 20	154.0	27.7	 16
321	 20	578.3	74.4	 16
322	 20	155.0	18.7	 16
323	 20	144.0	31.8	 16
324	 20	116.8	17.4	 16
325	 20	77.0	13.9	 16
326	 20	164.3	31.5	 16
327	 20	80.5	10.9	 16
328	 20	66.0	12.2	 16
329	 20	62.0	12.5	 16
330	 20	63.5	14.0	 16
331	 20	91.3	14.7	 16
332	 20	62.3	7.8	 16
333	 20	129.5	20.4	 16
334	 20	142.0	21.6	 16
335	 20	882.0	60.1	 16
336	 20	71.3	12.9	 16
337	 20	66.3	10.7	 16
338	 20	123.3	16.2	 16
339	 20	96.0	13.2	 16
340	 20	107.5	13.8	 16
341	 20	65.0	11.2	 16
342	 20	66.0	12.8	 16
343	 20	62.0	9.8	 16
344	 20	60.5	10.7	 16
345	 20	68.0	8.3	 16
346	 20	74.0	13.7	 16
347	 20	70.0	10.3	 16
348	 20	249.8	24.5	 16
349	 20	81.5	13.3	 16
350	 20	78.0	14.0	 16
351	 20	105.3	19.4	 16
352	 20	66.3	11.1	 16
353	 20	103.5	15.0	 16
354	 20	73.3	10.3	 16
355	 20	131.3	15.1	 16
356	 20	131.0	22.3	 16
357	 20	276.5	31.0	 16
358	 20	935.8	141.8	 16
359	 20	335.8	39.6	 16
360	 20	80.8	8.5	 16
361	 20	149.0	40.6	 16
362	 20	66.3	11.3	 16
363	 20	69.0	12.6	 16
364	 20	131.5	20.0	 16
365	 20	174.5	21.1	 20
366	 20	860.3	163.9	 16
367	 20	116.3	22.9	 16
368	 20	67.8	8.9	 16
369	 20	219.0	17.7	 16
370	 20	77.3	12.1	 16
371	 20	107.0	19.2	 16
372	 20	75.3	14.2	 16
373	 20	84.3	15.1	 16
374	 20	75.3	22.8	 16
375	 20	66.0	11.8	 16
376	 20	73.8	16.9	 16
377	 20	168.5	26.0	 16
378	 20	70.3	13.2	 16
379	 20	60.3	14.2	 16
380	 20	420.5	99.9	 16
381	 20	130.3	25.0	 16
382	 20	71.3	14.6	 16
383	 20	189.3	39.9	 16
384	 20	123.5	34.7	 16
385	 20	106.0	21.5	 16
386	 20	87.5	10.7	 16
387	 20	166.5	27.3	 16
388	 20	86.3	15.5	 16
389	 20	64.8	10.7	 16
390	 20	59.8	10.0	 16
391	 20	66.5	12.8	 16
392	 20	145.5	22.6	 16
393	 20	85.5	14.5	 16
394	 20	80.8	14.4	 16
395	 20	384.8	36.0	 16
396	 20	75.3	10.6	 16
397	 20	72.0	15.1	 16
398	 20	73.5	15.9	 16
399	 20	230.8	23.7	 16
400	 20	183.0	39.0	 16
401	 20	77.0	26.5	 16
402	 20	83.8	13.7	 16
403	 20	77.8	12.5	 16
404	 20	82.8	19.4	 16
405	 20	66.8	11.9	 16
406	 20	57.8	8.2	 16
407	 20	87.3	17.8	 16
408	 20	499.0	78.4	 16
409	 20	2513.3	352.5	 16
410	 20	65.5	11.2	 16
411	 20	105.0	19.0	 16
412	 20	415.0	46.4	 16
413	 20	103.3	16.4	 16
414	 20	204.0	21.5	 16
415	 20	84.8	10.2	 16
416	 20	147.3	18.2	 16
417	 20	77.0	16.6	 16
418	 20	143.8	22.0	 16
419	 20	63.0	12.6	 16
420	 20	271.5	22.2	 16
421	 20	59.8	11.9	 16
422	 20	76.0	18.1	 16
423	 20	259.5	20.8	 16
424	 20	332.5	38.8	 16
425	 20	115.8	17.3	 16
426	 20	93.8	14.0	 16
427	 20	141.5	16.8	 16
428	 20	223.8	34.3	 16
429	 20	184.3	25.2	 16
430	 20	64.8	12.7	 16
431	 20	200.5	16.6	 16
432	 20	123.5	21.0	 16
433	 20	92.0	13.7	 16
434	 20	393.8	63.3	 16
435	 20	70.0	12.8	 16
436	 20	110.3	15.0	 16
437	 20	86.0	13.7	 16
438	 20	61.5	12.0	 16
439	 20	57.0	9.8	 16
440	 20	71.0	14.3	 16
441	 20	140.0	20.5	 16
442	 20	172.0	19.3	 16
443	 20	73.5	17.3	 16
444	 20	297.3	37.0	 16
445	 20	178.5	22.4	 16
446	 20	204.3	26.6	 16
447	 20	82.8	14.5	 16
448	 20	101.8	24.2	 16
449	 20	116.3	17.2	 16
450	 20	82.0	13.5	 16
451	 20	91.3	16.6	 16
452	 20	83.0	16.1	 16
453	 20	63.5	9.5	 16
454	 20	65.8	9.0	 16
455	 20	76.0	15.9	 16
456	 20	104.5	14.8	 16
457	 20	86.0	15.1	 16
458	 20	103.8	17.7	 16
459	 20	69.5	11.4	 16
460	 20	60.3	8.0	 16
461	 20	57.0	10.1	 16
462	 20	64.0	11.7	 16
463	 20	109.3	13.9	 16
464	 20	63.5	9.9	 16
465	 20	80.0	37.1	 16
466	 20	53.0	8.7	 16
467	 20	57.0	12.6	 16
468	 20	175.0	25.9	 16
469	 20	103.3	16.5	 16
470	 20	236.3	36.4	 16
471	 20	509.3	35.2	 16
472	 20	80.0	10.8	 16
473	 20	99.8	15.4	 16
474	 20	53.8	11.1	 16
475	 20	90.3	33.1	 16
476	 20	117.3	17.4	 16
477	 20	58.0	9.4	 16
478	 20	99.3	19.5	 16
479	 20	72.0	18.6	 16
480	 20	218.5	22.5	 16
481	 20	65.3	8.9	 16
482	 20	61.0	11.4	 16
483	 20	75.3	31.6	 20
484	 20	79.0	11.9	 16
485	 20	587.5	67.2	 16
486	 20	575.5	44.4	 16
487	 20	642.0	39.9	 16
488	 20	758.3	103.5	 16
489	 20	178.8	32.6	 16
490	 20	76.0	9.8	 16
491	 20	205.5	35.1	 16
492	 20	81.8	14.1	 16
493	 20	152.8	21.0	 16
494	 20	141.8	23.4	 16
495	 20	79.3	12.0	 16
496	 20	277.3	68.1	 16
497	 20	96.0	17.8	 16
498	 20	184.3	44.1	 16
499	 20	70.8	17.4	 16
500	 20	71.5	15.4	 16
501	 20	74.5	17.0	 16
502	 20	87.8	18.9	 16
503	 20	106.0	16.7	 16
504	 20	166.3	23.1	 16
505	 20	92.3	11.8	 16
506	 20	92.0	14.3	 16
507	 20	176.3	19.1	 16
508	 20	95.5	11.1	 16
509	 20	357.3	101.9	 16
510	 20	84.5	12.2	 16
511	 20	191.8	29.7	 16
512	 20	67.0	13.1	 16
513	 20	58.0	8.6	 16
514	 20	71.3	13.7	 16
515	 20	64.0	8.6	 16
516	 20	125.0	50.8	 16
517	 20	98.0	15.6	 16
518	 20	59.3	7.7	 16
519	 20	57.3	6.9	 16
520	 20	69.0	17.5	 16
521	 20	60.5	11.4	 16
522	 20	61.0	10.6	 16
523	 20	169.0	27.0	 16
524	 20	64.8	13.2	 16
525	 20	73.5	10.2	 16
526	 20	102.0	14.1	 16
527	 20	100.3	14.9	 16
528	 20	182.0	40.6	 16
529	 20	607.8	57.3	 16
530	 20	145.8	41.6	 16
531	 20	321.0	45.2	 16
532	 20	127.8	25.5	 16
533	 20	84.3	14.7	 16
534	 20	69.3	12.3	 16
535	 20	70.5	11.8	 16
536	 20	76.0	10.3	 16
537	 20	151.0	61.3	 16
538	 20	76.0	14.3	 16
539	 20	104.0	14.9	 16
540	 20	95.5	16.3	 16
541	 20	79.3	18.9	 16
542	 20	107.0	20.5	 16
543	 20	113.8	23.2	 16
544	 20	74.5	11.8	 16
545	 20	71.0	11.2	 16
546	 20	96.5	22.4	 16
547	 20	81.8	11.6	 16
548	 20	78.8	17.9	 16
549	 20	100.8	18.9	 16
550	 20	70.8	13.4	 16
551	 20	69.5	13.3	 16
552	 20	80.8	20.7	 16
553	 20	158.0	20.0	 16
554	 20	61.3	7.4	 16
555	 20	75.8	18.9	 16
556	 20	88.3	14.2	 16
557	 20	115.0	24.7	 16
558	 20	74.0	12.1	 16
559	 20	219.8	29.9	 16
560	 20	131.0	19.3	 16
561	 20	68.3	9.1	 16
562	 20	114.0	12.8	 16
563	 20	81.5	14.4	 16
564	 20	103.8	20.5	 16
565	 20	59.0	11.1	 16
566	 20	122.3	17.6	 16
567	 20	72.0	11.0	 16
568	 20	612.0	64.4	 16
569	 20	68.8	9.6	 16
570	 20	54.3	8.1	 16
571	 20	130.8	21.6	 16
572	 20	99.3	10.7	 16
573	 20	81.0	15.8	 16
574	 20	128.8	22.7	 16
575	 20	93.0	13.0	 16
576	 20	228.0	35.7	 16
577	 20	69.8	11.7	 16
578	 20	91.8	22.5	 16
579	 20	142.5	17.1	 16
580	 20	637.3	83.2	 16
581	 20	538.0	78.2	 16
582	 20	93.3	12.7	 16
583	 20	107.5	27.1	 16
584	 20	88.3	13.0	 16
585	 20	80.5	9.9	 16
586	 20	351.8	48.1	 16
587	 20	219.0	33.3	 16
588	 20	78.3	15.1	 16
589	 20	64.3	10.1	 16
590	 20	268.8	40.2	 16
591	 20	102.5	22.5	 16
592	 20	149.0	23.4	 16
593	 20	98.0	14.0	 16
594	 20	73.5	13.0	 16
595	 20	107.3	16.3	 16
596	 20	79.8	13.2	 16
597	 20	286.3	49.7	 16
598	 20	79.0	11.9	 16
599	 20	125.0	21.0	 16
600	 20	162.3	26.3	 16
601	 20	168.3	24.7	 16
602	 20	566.8	65.2	 20
603	 20	181.0	23.6	 16
604	 20	81.3	11.6	 16
605	 20	83.0	15.1	 16
606	 20	133.8	18.4	 16
607	 20	274.0	44.4	 16
608	 20	592.0	62.1	 16
609	 20	119.0	20.9	 16
610	 20	90.0	16.6	 16
611	 20	67.8	10.6	 16
612	 20	60.0	5.9	 16
613	 20	71.3	11.0	 16
614	 20	79.3	44.8	 16
615	 20	317.8	29.7	 16
616	 20	339.8	48.8	 16
617	 20	201.3	41.9	 16
618	 20	147.0	32.7	 16
619	 20	77.3	15.4	 16
620	 20	55.5	10.2	 16
621	 20	64.8	14.8	 16
622	 20	88.3	16.4	 16
623	 20	83.3	14.7	 16
624	 20	76.5	15.5	 16
625	 20	92.3	9.0	 16
626	 20	91.5	14.6	 16
627	 20	69.5	23.4	 16
628	 20	62.0	9.3	 16
629	 20	151.0	28.0	 16
630	 20	79.0	21.4	 16
631	 20	161.3	16.3	 16
632	 20	165.3	27.9	 16
633	 20	108.3	11.9	 16
634	 20	120.8	19.4	 16
635	 20	111.5	14.8	 16
636	 20	273.0	33.7	 16
637	 20	82.8	13.2	 16
638	 20	100.0	13.6	 16
639	 20	177.3	33.5	 16
640	 20	151.8	20.2	 16
641	 20	1867.5	115.9	 16
642	 20	558.5	46.4	 16
643	 20	542.3	55.1	 16
644	 20	529.5	42.6	 16
645	 20	185.5	34.2	 16
646	 20	172.0	23.0	 16
647	 20	192.3	20.2	 16
648	 20	430.5	28.6	 16
649	 20	206.5	31.4	 16
650	 20	165.0	17.3	 16
651	 20	392.3	46.2	 16
652	 20	164.0	14.5	 16
653	 20	92.0	16.5	 16
654	 20	96.5	17.9	 16
655	 20	93.3	29.9	 16
656	 20	66.3	8.6	 16
657	 20	99.5	11.3	 16
658	 20	82.0	14.4	 16
659	 20	90.3	11.7	 16
660	 20	66.5	8.4	 16
661	 20	80.8	12.2	 16
662	 20	71.8	11.9	 16
663	 20	81.0	56.4	 16
664	 20	52.3	9.1	 16
665	 20	59.8	11.4	 16
666	 20	186.8	32.5	 16
667	 20	80.3	11.4	 16
668	 20	61.5	10.0	 16
669	 20	153.8	16.6	 16
670	 20	83.0	16.1	 16
671	 20	344.3	33.7	 16
672	 20	81.5	15.2	 16
673	 20	75.5	22.0	 16
674	 20	62.0	9.6	 16
675	 20	68.3	9.7	 16
676	 20	142.5	20.1	 16
677	 20	91.8	15.9	 16
678	 20	72.5	13.3	 16
679	 20	50.3	6.7	 16
680	 20	52.3	5.7	 16
681	 20	64.3	8.1	 16
682	 20	60.5	10.3	 16
683	 20	110.8	19.2	 16
684	 20	84.0	15.0	 16
685	 20	79.8	14.0	 16
686	 20	100.5	19.1	 16
687	 20	64.5	10.0	 16
688	 20	66.0	10.3	 16
689	 20	192.8	32.2	 16
690	 20	126.3	18.0	 16
691	 20	72.0	9.4	 16
692	 20	474.8	63.6	 16
693	 20	490.0	49.8	 16
694	 20	126.3	14.7	 16
695	 20	142.5	18.9	 16
696	 20	179.0	36.1	 16
697	 20	75.5	12.3	 16
698	 20	74.5	15.6	 16
699	 20	99.3	15.0	 16
700	 20	121.0	22.4	 16
701	 20	79.3	13.5	 16
702	 20	74.8	18.1	 16
703	 20	139.8	20.9	 16
704	 20	511.8	77.0	 16
705	 20	64.3	13.6	 16
706	 20	78.3	14.1	 16
707	 20	153.0	29.4	 16
708	 20	93.3	16.4	 16
709	 20	170.3	28.2	 16
710	 20	100.5	11.4	 16
711	 20	8447.5	1281.2	 16
  0	 21	100.5	15.8	 16
  1	 21	211.5	29.0	 16
  2	 21	347.0	69.9	 16
  3	 21	81.5	11.0	 16
  4	 21	111.3	16.4	 16
  5	 21	83.0	14.6	 16
  6	 21	80.0	11.2	 16
  7	 21	192.0	30.5	 16
  8	 21	250.5	63.9	 16
  9	 21	141.3	22.4	 16
 10	 21	201.0	26.7	 16
 11	 21	103.0	24.0	 16
 12	 21	208.5	29.7	 20
 13	 21	98.5	14.6	 16
 14	 21	219.8	28.2	 16
 15	 21	2322.8	466.3	 16
 16	 21	110.5	15.1	 16
 17	 21	102.5	28.0	 16
 18	 21	115.5	20.6	 16
 19	 21	181.0	33.1	 16
 20	 21	235.0	58.1	 16
 21	 21	140.5	20.6	 16
 22	 21	271.3	38.0	 16
 23	 21	81.3	15.6	 16
 24	 21	161.5	26.6	 16
 25	 21	316.3	62.1	 16
 26	 21	73.3	12.4	 16
 27	 21	91.0	14.4	 16
 28	 21	77.5	11.1	 16
 29	 21	87.5	15.5	 16
 30	 21	402.0	71.4	 16
 31	 21	341.0	69.6	 16
 32	 21	61.8	8.7	 16
 33	 21	1009.3	322.5	 16
 34	 21	513.0	141.8	 16
 35	 21	83.0	17.0	 16
 36	 21	78.8	13.6	 16
 37	 21	79.5	12.4	 16
 38	 21	231.3	25.2	 16
 39	 21	239.3	40.8	 16
 40	 21	364.0	50.0	 16
 41	 21	245.8	31.0	 16
 42	 21	71.5	13.3	 16
 43	 21	92.0	18.1	 16
 44	 21	80.3	14.2	 16
 45	 21	85.8	19.7	 16
 46	 21	90.3	13.4	 16
 47	 21	113.3	24.5	 16
 48	 21	186.5	32.9	 16
 49	 21	188.8	36.4	 16
 50	 21	67.5	13.7	 16
 51	 21	447.0	88.1	 16
 52	 21	464.0	116.3	 16
 53	 21	70.0	12.8	 16
 54	 21	128.3	24.5	 16
 55	 21	235.5	60.5	 16
 56	 21	436.3	60.5	 16
 57	 21	977.0	215.0	 16
 58	 21	1338.8	318.7	 16
 59	 21	385.0	60.5	 16
 60	 21	86.0	18.1	 16
 61	 21	96.3	20.7	 16
 62	 21	113.0	20.4	 16
 63	 21	378.3	71.2	 16
 64	 21	84.0	19.3	 16
 65	 21	96.0	14.6	 16
 66	 21	129.5	30.8	 16
 67	 21	76.3	12.4	 16
 68	 21	156.3	16.3	 16
 69	 21	305.8	40.3	 16
 70	 21	1313.0	265.3	 16
 71	 21	76.3	12.6	 16
 72	 21	107.8	18.7	 16
 73	 21	4152.5	887.7	 16
 74	 21	1098.3	217.2	 16
 75	 21	364.3	75.9	 16
 76	 21	93.0	16.9	 16
 77	 21	138.3	67.2	 16
 78	 21	130.3	22.9	 16
 79	 21	80.3	17.3	 16
 80	 21	122.0	24.1	 16
 81	 21	97.5	12.1	 16
 82	 21	139.3	24.4	 16
 83	 21	604.0	67.3	 16
 84	 21	1481.8	148.7	 16
 85	 21	104.3	16.4	 16
 86	 21	122.0	15.2	 16
 87	 21	163.5	35.4	 16
 88	 21	149.5	18.6	 16
 89	 21	121.5	19.1	 16
 90	 21	89.3	15.3	 16
 91	 21	168.5	24.5	 16
 92	 21	235.3	25.6	 16
 93	 21	395.5	54.6	 16
 94	 21	1430.3	174.2	 16
 95	 21	1378.5	206.4	 16
 96	 21	121.3	21.6	 16
 97	 21	151.0	21.1	 16
 98	 21	121.3	20.0	 16
 99	 21	67.0	13.3	 16
100	 21	112.3	19.4	 16
101	 21	233.5	73.1	 16
102	 21	107.3	18.8	 16
103	 21	65.5	13.3	 16
104	 21	128.5	20.9	 16
105	 21	123.5	18.2	 16
106	 21	124.0	21.8	 16
107	 21	442.5	59.1	 16
108	 21	78.5	11.6	 16
109	 21	269.5	41.2	 16
110	 21	113.0	14.3	 16
111	 21	95.8	17.3	 16
112	 21	1370.3	183.8	 16
113	 21	81.3	13.9	 16
114	 21	63.0	8.7	 16
115	 21	66.0	37.3	 16
116	 21	160.3	28.0	 16
117	 21	93.0	13.5	 16
118	 21	192.8	33.2	 16
119	 21	64.0	8.1	 16
120	 21	125.0	24.8	 16
121	 21	1924.8	281.6	 16
122	 21	1521.3	244.5	 16
123	 21	162.5	26.9	 16
124	 21	264.0	50.4	 16
125	 21	255.0	50.4	 16
126	 21	128.3	20.8	 16
127	 21	78.0	9.6	 16
128	 21	76.3	10.8	 16
129	 21	188.8	35.3	 16
130	 21	114.3	25.1	 20
131	 21	93.8	10.5	 16
132	 21	156.8	21.1	 16
133	 21	354.3	40.0	 16
134	 21	107.8	17.9	 16
135	 21	113.3	19.9	 16
136	 21	226.3	24.6	 16
137	 21	275.0	23.7	 16
138	 21	115.0	14.2	 16
139	 21	536.3	88.2	 16
140	 21	153.5	19.3	 16
141	 21	99.3	21.4	 16
142	 21	195.8	44.5	 16
143	 21	81.3	12.6	 16
144	 21	217.5	44.7	 16
145	 21	107.0	25.0	 16
146	 21	74.5	14.3	 16
147	 21	147.3	24.8	 16
148	 21	106.8	19.8	 16
149	 21	143.0	19.9	 16
150	 21	106.3	18.0	 16
151	 21	133.0	19.3	 16
152	 21	633.3	116.1	 16
153	 21	112.8	15.5	 16
154	 21	156.3	24.6	 16
155	 21	195.3	38.2	 16
156	 21	225.8	39.4	 16
157	 21	491.0	62.1	 16
158	 21	126.5	23.4	 16
159	 21	76.5	13.2	 16
160	 21	1107.5	166.5	 16
161	 21	94.3	14.2	 16
162	 21	744.3	118.5	 16
163	 21	92.0	14.6	 16
164	 21	202.5	31.7	 16
165	 21	72.8	12.7	 16
166	 21	60.8	11.3	 16
167	 21	188.8	40.7	 16
168	 21	120.5	19.1	 16
169	 21	174.0	43.4	 16
170	 21	99.3	19.0	 16
171	 21	247.3	26.0	 16
172	 21	209.8	41.8	 16
173	 21	183.5	32.5	 16
174	 21	89.3	17.4	 16
175	 21	138.3	26.4	 16
176	 21	106.0	14.3	 16
177	 21	69.8	16.6	 16
178	 21	111.0	17.0	 16
179	 21	388.3	66.3	 16
180	 21	247.5	41.2	 16
181	 21	65.8	12.3	 16
182	 21	174.5	30.9	 16
183	 21	63.3	11.8	 16
184	 21	92.3	51.8	 16
185	 21	66.3	10.4	 16
186	 21	70.5	15.7	 16
187	 21	84.8	11.6	 16
188	 21	82.0	14.4	 16
189	 21	1175.8	222.3	 16
190	 21	141.0	28.1	 16
191	 21	487.0	64.0	 16
192	 21	150.5	22.5	 16
193	 21	134.0	23.8	 16
194	 21	137.5	27.8	 16
195	 21	59.0	11.8	 16
196	 21	546.0	125.2	 16
197	 21	70.5	15.1	 16
198	 21	96.0	20.4	 16
199	 21	312.5	37.9	 16
200	 21	207.5	50.4	 16
201	 21	132.3	27.8	 16
202	 21	70.5	11.9	 16
203	 21	181.0	25.5	 16
204	 21	53.3	6.7	 16
205	 21	127.0	22.9	 16
206	 21	110.0	17.7	 16
207	 21	86.3	16.9	 16
208	 21	287.3	29.9	 16
209	 21	88.5	9.9	 16
210	 21	100.3	18.2	 16
211	 21	60.0	9.2	 16
212	 21	71.3	11.4	 16
213	 21	83.5	12.5	 16
214	 21	90.0	19.5	 16
215	 21	252.0	50.7	 16
216	 21	127.3	23.3	 16
217	 21	80.8	14.8	 16
218	 21	245.5	55.8	 16
219	 21	182.0	29.6	 16
220	 21	383.5	74.1	 16
221	 21	197.3	34.2	 16
222	 21	61.0	11.5	 16
223	 21	81.0	28.9	 16
224	 21	179.0	42.6	 16
225	 21	59.3	9.9	 16
226	 21	61.5	12.4	 16
227	 21	1647.8	229.5	 16
228	 21	106.0	19.7	 16
229	 21	635.0	38.8	 16
230	 21	673.0	75.3	 16
231	 21	632.3	150.4	 16
232	 21	616.3	118.5	 16
233	 21	75.8	14.1	 16
234	 21	167.3	34.4	 16
235	 21	250.5	34.3	 16
236	 21	65.3	11.4	 16
237	 21	77.8	15.2	 16
238	 21	58.3	9.8	 16
239	 21	127.3	31.7	 16
240	 21	86.0	15.0	 16
241	 21	150.0	16.4	 16
242	 21	71.3	9.8	 16
243	 21	646.3	113.4	 16
244	 21	108.3	15.4	 16
245	 21	239.3	46.5	 16
246	 21	483.0	119.8	 16
247	 21	205.8	38.6	 16
248	 21	160.8	29.5	 16
249	 21	182.3	27.3	 20
250	 21	81.8	14.3	 16
251	 21	70.3	10.7	 16
252	 21	59.3	12.3	 16
253	 21	66.3	9.5	 16
254	 21	60.0	8.6	 16
255	 21	103.3	20.5	 16
256	 21	131.0	11.8	 16
257	 21	174.3	33.0	 16
258	 21	148.3	23.6	 16
259	 21	101.5	15.7	 16
260	 21	82.3	17.2	 16
261	 21	80.3	26.4	 16
262	 21	974.8	144.2	 16
263	 21	3577.3	956.8	 16
264	 21	60.8	13.0	 16
265	 21	108.5	23.2	 16
266	 21	174.8	31.8	 16
267	 21	110.8	14.8	 16
268	 21	91.5	9.9	 16
269	 21	355.8	53.3	 16
270	 21	517.8	139.2	 16
271	 21	72.5	15.6	 16
272	 21	81.3	15.3	 16
273	 21	64.8	9.7	 16
274	 21	135.8	18.8	 16
275	 21	619.5	117.2	 16
276	 21	287.8	35.6	 16
277	 21	73.3	13.1	 16
278	 21	150.0	35.0	 16
279	 21	435.8	96.8	 16
280	 21	94.8	21.2	 16
281	 21	161.3	23.3	 16
282	 21	57.5	7.6	 16
283	 21	331.3	58.6	 16
284	 21	56.0	8.5	 16
285	 21	59.3	8.9	 16
286	 21	127.0	29.5	 16
287	 21	196.0	33.7	 16
288	 21	796.5	145.0	 16
289	 21	107.5	16.6	 16
290	 21	119.8	22.4	 16
291	 21	153.3	19.8	 16
292	 21	82.3	18.3	 16
293	 21	296.0	48.0	 16
294	 21	350.3	53.9	 16
295	 21	85.5	16.5	 16
296	 21	155.3	37.7	 16
297	 21	69.3	17.5	 16
298	 21	67.5	21.6	 16
299	 21	110.0	17.7	 16
300	 21	112.8	17.8	 16
301	 21	134.3	24.3	 16
302	 21	321.8	47.2	 16
303	 21	481.0	54.0	 16
304	 21	464.5	44.0	 16
305	 21	2135.0	392.0	 16
306	 21	139.8	36.0	 16
307	 21	76.0	13.5	 16
308	 21	69.0	11.4	 16
309	 21	144.8	27.8	 16
310	 21	128.5	20.5	 16
311	 21	253.3	38.0	 16
312	 21	79.0	12.0	 16
313	 21	264.0	59.4	 16
314	 21	78.3	13.1	 16
315	 21	63.5	13.0	 16
316	 21	95.8	14.1	 16
317	 21	392.3	75.4	 16
318	 21	1183.3	252.2	 16
319	 21	86.0	18.1	 16
320	 21	201.3	32.4	 16
321	 21	1351.8	104.2	 16
322	 21	3463.5	428.3	 16
323	 21	600.0	67.0	 16
324	 21	89.0	30.3	 16
325	 21	86.3	11.6	 16
326	 21	307.8	40.1	 16
327	 21	133.8	19.2	 16
328	 21	64.5	8.1	 16
329	 21	240.8	37.8	 16
330	 21	55.0	9.4	 16
331	 21	186.0	66.7	 16
332	 21	397.8	34.2	 16
333	 21	221.0	34.4	 16
334	 21	231.3	26.8	 16
335	 21	257.0	35.7	 16
336	 21	64.8	8.9	 16
337	 21	131.5	24.2	 16
338	 21	147.0	23.6	 16
339	 21	77.5	11.1	 16
340	 21	180.8	33.3	 16
341	 21	859.8	162.5	 16
342	 21	80.0	10.8	 16
343	 21	82.5	17.8	 16
344	 21	135.5	21.5	 16
345	 21	80.3	15.3	 16
346	 21	120.0	24.4	 16
347	 21	89.5	17.5	 16
348	 21	1671.0	180.5	 16
349	 21	1608.0	159.7	 16
350	 21	171.8	23.3	 16
351	 21	137.0	25.0	 16
352	 21	131.8	32.0	 16
353	 21	131.8	18.9	 16
354	 21	86.0	17.6	 16
355	 21	3858.8	622.0	 16
356	 21	194.0	27.6	 16
357	 21	681.5	68.1	 16
358	 21	237.3	26.2	 16
359	 21	554.3	88.0	 16
360	 21	404.5	37.0	 16
361	 21	782.5	151.8	 16
362	 21	77.3	10.5	 16
363	 21	172.3	77.7	 16
364	 21	61.3	9.5	 16
365	 21	119.0	19.7	 16
366	 21	190.3	35.9	 16
367	 21	431.3	44.9	 16
368	 21	128.5	18.7	 20
369	 21	425.5	70.8	 16
370	 21	240.5	27.6	 16
371	 21	303.8	47.0	 16
372	 21	203.3	31.8	 16
373	 21	82.8	41.4	 16
374	 21	102.5	14.7	 16
375	 21	267.8	47.8	 16
376	 21	94.3	18.8	 16
377	 21	107.3	18.3	 16
378	 21	123.0	27.5	 16
379	 21	80.0	13.0	 16
380	 21	87.3	18.1	 16
381	 21	66.3	11.5	 16
382	 21	102.8	20.8	 16
383	 21	117.8	18.4	 16
384	 21	66.0	12.7	 16
385	 21	79.8	18.2	 16
386	 21	66.3	19.6	 16
387	 21	113.3	26.5	 16
388	 21	88.0	17.6	 16
389	 21	136.0	22.9	 16
390	 21	76.8	14.7	 16
391	 21	59.8	13.6	 16
392	 21	1563.0	102.0	 16
393	 21	1476.8	261.5	 16
394	 21	75.8	13.4	 16
395	 21	93.0	13.6	 16
396	 21	534.3	101.5	 16
397	 21	4709.3	603.3	 16
398	 21	170.3	23.2	 16
399	 21	167.3	38.5	 16
400	 21	201.8	34.5	 16
401	 21	103.5	14.2	 16
402	 21	69.8	14.5	 16
403	 21	173.5	37.4	 16
404	 21	134.0	22.4	 16
405	 21	75.5	14.1	 16
406	 21	487.5	90.1	 16
407	 21	238.3	39.5	 16
408	 21	113.3	16.9	 16
409	 21	71.3	12.8	 16
410	 21	81.3	16.9	 16
411	 21	77.3	19.3	 16
412	 21	1434.3	242.9	 16
413	 21	100.0	15.7	 16
414	 21	521.0	112.1	 16
415	 21	199.8	29.9	 16
416	 21	141.3	19.8	 16
417	 21	108.8	19.4	 16
418	 21	134.8	16.7	 16
419	 21	136.5	26.4	 16
420	 21	62.0	10.2	 16
421	 21	109.5	22.6	 16
422	 21	142.0	24.6	 16
423	 21	137.5	26.6	 16
424	 21	1011.5	90.9	 16
425	 21	319.5	32.3	 16
426	 21	171.0	22.7	 16
427	 21	174.8	15.2	 16
428	 21	166.5	23.2	 16
429	 21	140.5	13.4	 16
430	 21	273.5	40.3	 16
431	 21	99.5	21.0	 16
432	 21	211.0	32.7	 16
433	 21	252.3	23.3	 16
434	 21	255.8	30.5	 16
435	 21	242.5	31.2	 16
436	 21	84.5	15.5	 16
437	 21	108.3	13.4	 16
438	 21	310.8	73.0	 16
439	 21	80.3	14.8	 16
440	 21	93.3	15.8	 16
441	 21	145.0	22.9	 16
442	 21	103.3	17.6	 16
443	 21	80.0	16.2	 16
444	 21	107.0	21.0	 16
445	 21	67.8	11.1	 16
446	 21	149.5	29.7	 16
447	 21	123.0	19.9	 16
448	 21	191.3	22.2	 16
449	 21	3398.5	283.9	 16
450	 21	232.8	31.0	 16
451	 21	158.3	21.4	 16
452	 21	154.5	26.1	 16
453	 21	78.0	13.7	 16
454	 21	227.0	39.5	 16
455	 21	99.3	11.6	 16
456	 21	252.3	33.0	 16
457	 21	90.0	15.7	 16
458	 21	318.5	42.4	 16
459	 21	139.5	17.5	 16
460	 21	372.0	79.4	 16
461	 21	181.0	29.2	 16
462	 21	310.5	49.1	 16
463	 21	488.0	54.2	 16
464	 21	110.8	15.6	 16
465	 21	121.3	22.7	 16
466	 21	160.3	19.4	 16
467	 21	342.5	44.0	 16
468	 21	186.3	24.3	 16
469	 21	166.5	22.1	 16
470	 21	120.0	9.3	 16
471	 21	89.5	17.9	 16
472	 21	71.0	11.6	 16
473	 21	189.5	24.1	 16
474	 21	67.3	13.4	 16
475	 21	71.5	11.2	 16
476	 21	485.0	43.2	 16
477	 21	1103.5	110.4	 16
478	 21	235.0	37.8	 16
479	 21	110.8	19.8	 16
480	 21	78.0	14.0	 16
481	 21	57.5	10.3	 16
482	 21	89.8	16.1	 16
483	 21	89.0	19.5	 16
484	 21	61.3	10.2	 16
485	 21	84.5	14.9	 16
486	 21	105.3	20.6	 20
487	 21	314.8	27.2	 16
488	 21	111.3	16.1	 16
489	 21	89.3	17.6	 16
490	 21	358.5	72.1	 16
491	 21	279.5	43.8	 16
492	 21	273.3	56.8	 16
493	 21	135.3	25.4	 16
494	 21	166.0	31.1	 16
495	 21	99.5	33.4	 16
496	 21	104.5	21.2	 16
497	 21	72.3	9.9	 16
498	 21	127.8	24.1	 16
499	 21	150.3	28.0	 16
500	 21	140.8	29.6	 16
501	 21	397.0	90.3	 16
502	 21	191.0	35.8	 16
503	 21	132.0	26.9	 16
504	 21	129.3	19.1	 16
505	 21	825.8	206.4	 16
506	 21	68.8	11.2	 16
507	 21	684.0	199.3	 16
508	 21	130.5	25.4	 16
509	 21	90.3	11.7	 16
510	 21	106.3	19.0	 16
511	 21	4579.3	753.6	 16
512	 21	100.3	13.3	 16
513	 21	67.3	10.3	 16
514	 21	73.0	12.6	 16
515	 21	335.5	52.2	 16
516	 21	237.8	41.1	 16
517	 21	70.8	13.2	 16
518	 21	185.5	35.8	 16
519	 21	67.0	10.4	 16
520	 21	178.8	32.8	 16
521	 21	448.0	60.4	 16
522	 21	440.3	70.6	 16
523	 21	94.3	13.6	 16
524	 21	67.5	14.3	 16
525	 21	79.0	9.2	 16
526	 21	63.0	10.6	 16
527	 21	269.0	28.9	 16
528	 21	211.3	21.2	 16
529	 21	328.5	38.0	 16
530	 21	181.8	31.9	 16
531	 21	85.8	10.9	 16
532	 21	726.0	157.5	 16
533	 21	67.3	11.1	 16
534	 21	69.3	13.1	 16
535	 21	299.5	40.9	 16
536	 21	80.0	14.5	 16
537	 21	160.0	22.4	 16
538	 21	67.3	13.3	 16
539	 21	89.8	11.9	 16
540	 21	63.0	11.3	 16
541	 21	86.3	16.9	 16
542	 21	69.0	13.6	 16
543	 21	434.5	41.2	 16
544	 21	136.8	18.2	 16
545	 21	1042.5	110.8	 16
546	 21	1008.5	75.7	 16
547	 21	110.5	26.3	 16
548	 21	174.8	28.1	 16
549	 21	112.5	16.9	 16
550	 21	130.5	20.4	 16
551	 21	96.3	16.3	 16
552	 21	146.3	19.2	 16
553	 21	87.5	15.3	 16
554	 21	69.8	12.1	 16
555	 21	62.0	13.6	 16
556	 21	60.5	8.5	 16
557	 21	66.8	14.6	 16
558	 21	65.3	9.5	 16
559	 21	68.3	9.6	 16
560	 21	91.0	21.5	 16
561	 21	128.3	17.9	 16
562	 21	158.0	14.3	 16
563	 21	236.8	28.8	 16
564	 21	244.0	28.5	 16
565	 21	68.3	14.1	 16
566	 21	248.0	29.9	 16
567	 21	60.8	10.5	 16
568	 21	474.8	54.6	 16
569	 21	193.0	31.3	 16
570	 21	65.0	14.1	 16
571	 21	113.3	20.7	 16
572	 21	87.8	10.5	 16
573	 21	95.5	17.6	 16
574	 21	363.5	71.1	 16
575	 21	146.0	23.6	 16
576	 21	281.8	36.5	 16
577	 21	174.8	27.4	 16
578	 21	174.8	23.6	 16
579	 21	168.3	26.0	 16
580	 21	204.0	20.6	 16
581	 21	71.0	8.1	 16
582	 21	75.0	13.3	 16
583	 21	3487.8	596.1	 16
584	 21	98.3	16.4	 16
585	 21	804.8	171.8	 16
586	 21	217.3	47.7	 16
587	 21	65.3	10.4	 16
588	 21	83.3	11.8	 16
589	 21	94.5	16.6	 16
590	 21	146.0	21.1	 16
591	 21	596.8	65.0	 16
592	 21	371.3	43.5	 16
593	 21	176.5	25.6	 16
594	 21	98.5	11.9	 16
595	 21	97.5	14.8	 16
596	 21	149.0	27.4	 16
597	 21	81.5	17.7	 16
598	 21	89.3	15.7	 16
599	 21	184.5	25.3	 16
600	 21	89.3	16.5	 16
601	 21	85.5	14.2	 16
602	 21	1034.8	182.7	 16
603	 21	138.5	19.0	 16
604	 21	90.5	14.3	 16
605	 21	110.5	19.2	 20
606	 21	141.3	18.9	 16
607	 21	123.8	18.2	 16
608	 21	150.8	22.2	 16
609	 21	688.5	81.3	 16
610	 21	111.3	21.9	 16
611	 21	83.0	11.3	 16
612	 21	197.3	25.9	 16
613	 21	304.5	28.9	 16
614	 21	175.3	29.6	 16
615	 21	153.3	23.6	 16
616	 21	249.8	21.7	 16
617	 21	204.0	35.6	 16
618	 21	83.3	18.9	 16
619	 21	394.0	43.1	 16
620	 21	110.5	22.9	 16
621	 21	143.5	11.8	 16
622	 21	81.3	16.7	 16
623	 21	132.0	24.5	 16
624	 21	75.8	10.7	 16
625	 21	89.0	18.3	 16
626	 21	293.3	35.1	 16
627	 21	83.5	13.5	 16
628	 21	111.0	25.0	 16
629	 21	92.8	18.7	 16
630	 21	134.0	20.6	 16
631	 21	117.5	20.9	 16
632	 21	718.8	50.1	 16
633	 21	134.0	16.6	 16
634	 21	82.8	13.6	 16
635	 21	1228.0	124.6	 16
636	 21	122.5	20.7	 16
637	 21	113.0	25.1	 16
638	 21	729.8	134.1	 16
639	 21	70.0	11.7	 16
640	 21	69.8	14.9	 16
641	 21	284.8	26.5	 16
642	 21	95.3	40.0	 16
643	 21	69.8	11.5	 16
644	 21	71.5	12.8	 16
645	 21	65.0	13.7	 16
646	 21	109.5	16.9	 16
647	 21	94.8	13.1	 16
648	 21	244.8	28.8	 16
649	 21	217.3	32.4	 16
650	 21	133.0	18.8	 16
651	 21	161.3	17.7	 16
652	 21	248.3	28.4	 16
653	 21	241.0	28.5	 16
654	 21	94.0	16.5	 16
655	 21	200.3	29.1	 16
656	 21	2772.8	283.4	 16
657	 21	7061.8	589.1	 16
658	 21	121.0	19.0	 16
659	 21	82.0	14.2	 16
660	 21	256.8	33.7	 16
661	 21	94.3	18.5	 16
662	 21	946.0	98.7	 16
663	 21	96.8	40.3	 16
664	 21	717.3	89.2	 16
665	 21	64.3	10.5	 16
666	 21	95.8	19.1	 16
667	 21	67.5	10.4	 16
668	 21	82.8	12.3	 16
669	 21	56.3	10.0	 16
670	 21	60.3	10.6	 16
671	 21	674.0	114.9	 16
672	 21	118.0	21.0	 16
673	 21	228.8	45.1	 16
674	 21	453.8	95.4	 16
675	 21	550.0	121.2	 16
676	 21	482.8	41.3	 16
677	 21	114.3	16.0	 16
678	 21	86.0	17.0	 16
679	 21	246.8	39.2	 16
680	 21	69.3	10.9	 16
681	 21	93.0	15.0	 16
682	 21	408.5	44.3	 16
683	 21	65.3	14.9	 16
684	 21	56.3	9.7	 16
685	 21	62.8	15.5	 16
686	 21	77.0	8.1	 16
687	 21	192.5	28.8	 16
688	 21	114.3	18.4	 16
689	 21	1225.5	153.7	 16
690	 21	1049.3	83.3	 16
691	 21	208.0	31.9	 16
692	 21	101.5	15.5	 16
693	 21	382.3	49.1	 16
694	 21	241.3	18.7	 16
695	 21	100.5	18.3	 16
696	 21	115.5	16.0	 16
697	 21	160.8	21.3	 16
698	 21	168.0	34.8	 16
699	 21	58.3	6.5	 16
700	 21	1367.5	124.4	 16
701	 21	138.0	23.8	 16
702	 21	72.5	10.3	 16
703	 21	112.3	14.3	 16
704	 21	156.0	49.3	 16
705	 21	143.5	17.3	 16
706	 21	413.8	27.2	 16
707	 21	206.3	43.9	 16
708	 21	117.5	20.0	 16
709	 21	193.5	17.3	 16
710	 21	458.0	58.4	 16
711	 21	92.3	13.8	 16
  0	 22	4156.8	727.1	 16
  1	 22	267.0	42.9	 16
  2	 22	84.5	14.8	 16
  3	 22	77.8	10.7	 16
  4	 22	117.8	16.1	 16
  5	 22	71.3	15.2	 16
  6	 22	84.0	20.4	 16
  7	 22	187.5	50.3	 16
  8	 22	155.8	25.6	 16
  9	 22	108.5	14.4	 16
 10	 22	197.3	26.1	 16
 11	 22	135.3	20.2	 16
 12	 22	115.5	21.5	 16
 13	 22	84.0	28.7	 16
 14	 22	124.0	25.1	 16
 15	 22	195.0	39.5	 20
 16	 22	92.8	17.0	 16
 17	 22	149.0	19.1	 16
 18	 22	123.8	22.0	 16
 19	 22	86.3	14.1	 16
 20	 22	75.0	11.5	 16
 21	 22	116.8	20.6	 16
 22	 22	152.8	30.6	 16
 23	 22	68.3	10.0	 16
 24	 22	87.0	12.0	 16
 25	 22	117.3	31.0	 16
 26	 22	71.3	14.4	 16
 27	 22	91.5	20.5	 16
 28	 22	79.5	16.8	 16
 29	 22	75.8	15.8	 16
 30	 22	234.0	29.7	 16
 31	 22	198.5	36.7	 16
 32	 22	68.0	15.4	 16
 33	 22	155.8	29.5	 16
 34	 22	142.3	28.9	 16
 35	 22	71.3	10.3	 16
 36	 22	82.3	15.6	 16
 37	 22	68.8	16.5	 16
 38	 22	154.5	30.0	 16
 39	 22	323.0	48.9	 16
 40	 22	171.0	26.2	 16
 41	 22	195.8	24.1	 16
 42	 22	78.0	11.9	 16
 43	 22	75.3	13.4	 16
 44	 22	74.3	9.0	 16
 45	 22	77.3	16.9	 16
 46	 22	102.3	19.5	 16
 47	 22	76.3	20.3	 16
 48	 22	93.8	15.4	 16
 49	 22	70.3	11.0	 16
 50	 22	67.0	11.8	 16
 51	 22	143.5	23.6	 16
 52	 22	140.0	37.8	 16
 53	 22	59.3	9.2	 16
 54	 22	80.3	11.0	 16
 55	 22	75.3	13.1	 16
 56	 22	190.0	32.0	 16
 57	 22	476.0	64.5	 16
 58	 22	212.8	62.7	 16
 59	 22	157.8	23.7	 16
 60	 22	73.5	13.1	 16
 61	 22	79.0	8.6	 16
 62	 22	84.8	13.0	 16
 63	 22	182.3	19.6	 16
 64	 22	97.0	16.0	 16
 65	 22	90.3	21.4	 16
 66	 22	125.0	15.8	 16
 67	 22	67.8	10.3	 16
 68	 22	255.3	37.1	 16
 69	 22	430.3	46.7	 16
 70	 22	976.5	253.8	 16
 71	 22	72.3	10.4	 16
 72	 22	123.3	43.0	 16
 73	 22	660.3	161.3	 16
 74	 22	198.8	49.4	 16
 75	 22	111.8	18.8	 16
 76	 22	78.8	16.2	 16
 77	 22	80.3	11.8	 16
 78	 22	225.0	91.9	 16
 79	 22	78.3	15.3	 16
 80	 22	128.5	20.0	 16
 81	 22	206.3	36.5	 16
 82	 22	162.5	26.1	 16
 83	 22	204.5	18.7	 16
 84	 22	313.5	37.5	 16
 85	 22	116.0	19.6	 16
 86	 22	90.0	12.3	 16
 87	 22	144.3	21.2	 16
 88	 22	84.0	16.2	 16
 89	 22	156.5	14.6	 16
 90	 22	76.0	13.0	 16
 91	 22	262.0	26.4	 16
 92	 22	424.0	45.6	 16
 93	 22	118.3	24.5	 16
 94	 22	529.5	58.2	 16
 95	 22	446.5	71.9	 16
 96	 22	104.3	22.0	 16
 97	 22	160.0	25.2	 16
 98	 22	91.3	20.9	 16
 99	 22	62.5	19.4	 16
100	 22	100.0	65.3	 16
101	 22	86.5	14.6	 16
102	 22	95.0	16.0	 16
103	 22	61.0	10.6	 16
104	 22	115.0	18.0	 16
105	 22	291.8	32.2	 16
106	 22	247.3	31.7	 16
107	 22	69.3	11.2	 16
108	 22	75.8	14.6	 16
109	 22	242.5	21.0	 16
110	 22	87.3	16.6	 16
111	 22	96.3	17.9	 16
112	 22	157.0	30.7	 16
113	 22	74.8	15.6	 16
114	 22	78.5	17.3	 16
115	 22	73.5	14.7	 16
116	 22	87.5	11.8	 16
117	 22	70.3	14.4	 16
118	 22	72.3	10.1	 16
119	 22	58.8	6.7	 16
120	 22	232.3	26.5	 16
121	 22	343.0	74.5	 16
122	 22	119.0	53.6	 16
123	 22	103.8	15.2	 16
124	 22	86.8	12.1	 16
125	 22	103.3	25.1	 16
126	 22	165.3	30.5	 16
127	 22	68.5	12.6	 16
128	 22	72.5	15.4	 16
129	 22	366.5	42.0	 16
130	 22	85.5	15.2	 16
131	 22	69.3	9.1	 16
132	 22	96.0	14.0	 16
133	 22	194.3	21.7	 16
134	 22	93.3	17.4	 20
135	 22	77.0	10.0	 16
136	 22	123.0	17.0	 16
137	 22	160.5	27.6	 16
138	 22	90.0	21.2	 16
139	 22	118.0	18.0	 16
140	 22	130.3	21.4	 16
141	 22	71.3	14.9	 16
142	 22	110.3	24.7	 16
143	 22	83.3	14.1	 16
144	 22	202.0	29.1	 16
145	 22	101.8	15.5	 16
146	 22	70.5	15.3	 16
147	 22	80.5	13.4	 16
148	 22	70.3	12.4	 16
149	 22	80.3	12.4	 16
150	 22	96.3	20.1	 16
151	 22	85.3	11.8	 16
152	 22	496.8	68.4	 16
153	 22	120.3	22.2	 16
154	 22	83.0	13.9	 16
155	 22	80.5	15.1	 16
156	 22	141.3	19.9	 16
157	 22	152.3	29.5	 16
158	 22	94.5	18.1	 16
159	 22	76.5	17.6	 16
160	 22	428.8	51.9	 16
161	 22	73.5	12.2	 16
162	 22	244.3	25.9	 16
163	 22	66.3	9.5	 16
164	 22	66.5	15.7	 16
165	 22	71.5	14.3	 16
166	 22	76.3	12.4	 16
167	 22	157.3	26.1	 16
168	 22	101.3	13.3	 16
169	 22	79.8	21.4	 16
170	 22	80.5	28.3	 16
171	 22	160.3	27.1	 16
172	 22	115.8	20.3	 16
173	 22	177.8	25.6	 16
174	 22	113.3	19.7	 16
175	 22	77.5	11.5	 16
176	 22	142.3	12.8	 16
177	 22	99.3	15.4	 16
178	 22	93.8	15.1	 16
179	 22	90.3	17.0	 16
180	 22	129.8	20.9	 16
181	 22	66.8	12.0	 16
182	 22	100.8	18.4	 16
183	 22	60.3	12.0	 16
184	 22	66.8	14.4	 16
185	 22	63.8	9.3	 16
186	 22	61.3	10.8	 16
187	 22	66.5	12.0	 16
188	 22	65.5	14.0	 16
189	 22	253.8	41.0	 16
190	 22	79.0	16.8	 16
191	 22	142.5	24.9	 16
192	 22	83.0	14.2	 16
193	 22	108.3	23.8	 16
194	 22	66.8	12.5	 16
195	 22	59.3	9.5	 16
196	 22	182.5	28.5	 16
197	 22	62.0	9.6	 16
198	 22	80.5	14.8	 16
199	 22	307.5	38.6	 16
200	 22	83.3	25.3	 16
201	 22	69.8	18.4	 16
202	 22	64.5	9.6	 16
203	 22	66.3	11.8	 16
204	 22	60.3	12.0	 16
205	 22	72.3	10.2	 16
206	 22	88.5	17.4	 16
207	 22	85.5	14.4	 16
208	 22	187.0	19.8	 16
209	 22	142.0	20.1	 16
210	 22	245.5	33.4	 16
211	 22	47.0	8.0	 16
212	 22	66.0	10.9	 16
213	 22	63.3	11.3	 16
214	 22	77.0	17.3	 16
215	 22	83.5	10.8	 16
216	 22	266.5	19.8	 16
217	 22	60.3	13.6	 16
218	 22	67.5	12.9	 16
219	 22	130.5	16.6	 16
220	 22	170.0	29.1	 16
221	 22	128.5	24.7	 16
222	 22	74.0	16.2	 16
223	 22	57.3	13.4	 16
224	 22	87.5	19.1	 16
225	 22	68.5	12.8	 16
226	 22	65.5	12.5	 16
227	 22	336.3	52.2	 16
228	 22	104.5	16.6	 16
229	 22	403.0	67.0	 16
230	 22	181.0	17.7	 16
231	 22	90.8	10.6	 16
232	 22	81.3	16.4	 16
233	 22	84.0	14.9	 16
234	 22	232.3	27.4	 16
235	 22	158.3	17.8	 16
236	 22	58.8	14.2	 16
237	 22	75.0	15.1	 16
238	 22	70.8	12.2	 16
239	 22	81.0	15.2	 16
240	 22	96.3	38.4	 16
241	 22	114.3	17.6	 16
242	 22	73.5	11.9	 16
243	 22	311.3	39.5	 16
244	 22	142.3	23.5	 16
245	 22	170.3	28.1	 16
246	 22	279.3	26.0	 16
247	 22	96.3	16.7	 16
248	 22	234.8	30.9	 16
249	 22	123.3	19.6	 16
250	 22	76.0	11.2	 16
251	 22	62.3	10.5	 16
252	 22	52.3	8.8	 20
253	 22	58.8	10.3	 16
254	 22	72.3	10.2	 16
255	 22	86.0	10.7	 16
256	 22	121.0	23.6	 16
257	 22	91.5	19.7	 16
258	 22	113.3	25.1	 16
259	 22	84.3	15.2	 16
260	 22	76.0	14.9	 16
261	 22	97.0	13.0	 16
262	 22	392.3	39.8	 16
263	 22	627.5	154.2	 16
264	 22	56.5	14.2	 16
265	 22	94.5	17.0	 16
266	 22	184.5	61.3	 16
267	 22	189.5	42.9	 16
268	 22	152.3	30.4	 16
269	 22	188.8	40.3	 16
270	 22	126.8	42.7	 16
271	 22	80.3	14.9	 16
272	 22	70.0	13.1	 16
273	 22	81.3	12.4	 16
274	 22	126.3	20.9	 16
275	 22	116.0	24.9	 16
276	 22	125.0	18.9	 16
277	 22	71.8	15.3	 16
278	 22	81.8	12.7	 16
279	 22	85.8	10.7	 16
280	 22	78.8	12.7	 16
281	 22	73.8	10.5	 16
282	 22	55.0	8.4	 16
283	 22	66.5	10.7	 16
284	 22	62.0	12.7	 16
285	 22	66.5	15.8	 16
286	 22	71.3	11.9	 16
287	 22	110.3	17.0	 16
288	 22	274.3	50.2	 16
289	 22	100.0	10.3	 16
290	 22	127.3	19.2	 16
291	 22	98.8	13.9	 16
292	 22	101.8	14.9	 16
293	 22	165.5	21.3	 16
294	 22	144.3	24.2	 16
295	 22	68.0	9.5	 16
296	 22	109.3	17.6	 16
297	 22	83.0	13.5	 16
298	 22	91.3	18.3	 16
299	 22	73.3	12.4	 16
300	 22	78.3	13.9	 16
301	 22	113.0	18.0	 16
302	 22	737.8	52.2	 16
303	 22	257.3	21.7	 16
304	 22	305.8	38.0	 16
305	 22	386.5	67.8	 16
306	 22	106.0	15.8	 16
307	 22	75.3	12.6	 16
308	 22	53.3	9.5	 16
309	 22	126.0	14.8	 16
310	 22	104.5	14.2	 16
311	 22	99.5	23.3	 16
312	 22	78.5	8.4	 16
313	 22	174.3	22.7	 16
314	 22	68.0	14.0	 16
315	 22	73.3	19.1	 16
316	 22	74.3	13.4	 16
317	 22	1265.3	187.2	 16
318	 22	342.8	54.6	 16
319	 22	84.5	18.4	 16
320	 22	157.8	28.4	 16
321	 22	142.5	27.9	 16
322	 22	343.5	50.3	 16
323	 22	98.5	16.9	 16
324	 22	76.0	14.4	 16
325	 22	84.5	28.9	 16
326	 22	81.0	22.1	 16
327	 22	68.0	13.9	 16
328	 22	69.5	11.2	 16
329	 22	64.3	14.1	 16
330	 22	59.0	9.0	 16
331	 22	104.3	26.9	 16
332	 22	163.3	26.2	 16
333	 22	104.3	25.0	 16
334	 22	104.0	23.1	 16
335	 22	791.8	82.6	 16
336	 22	74.3	14.3	 16
337	 22	123.0	15.0	 16
338	 22	371.8	44.6	 16
339	 22	79.3	10.5	 16
340	 22	218.0	17.6	 16
341	 22	193.0	24.6	 16
342	 22	194.0	30.5	 16
343	 22	95.0	13.2	 16
344	 22	87.3	15.3	 16
345	 22	83.5	18.2	 16
346	 22	65.3	7.4	 16
347	 22	96.8	16.6	 16
348	 22	368.0	59.9	 16
349	 22	349.5	36.9	 16
350	 22	95.5	17.6	 16
351	 22	88.3	18.2	 16
352	 22	85.8	40.6	 16
353	 22	82.5	9.2	 16
354	 22	105.5	20.5	 16
355	 22	890.3	129.2	 16
356	 22	156.0	11.9	 16
357	 22	915.3	67.5	 16
358	 22	248.8	25.0	 16
359	 22	235.5	24.8	 16
360	 22	250.3	25.0	 16
361	 22	137.3	24.4	 16
362	 22	84.0	14.0	 16
363	 22	79.3	11.4	 16
364	 22	73.5	11.4	 16
365	 22	111.0	15.2	 16
366	 22	105.0	15.5	 16
367	 22	145.5	27.3	 16
368	 22	178.0	26.0	 16
369	 22	99.3	13.2	 16
370	 22	160.0	27.2	 16
371	 22	123.3	15.2	 20
372	 22	106.0	13.6	 16
373	 22	73.0	8.2	 16
374	 22	91.5	14.1	 16
375	 22	90.3	13.7	 16
376	 22	107.3	15.3	 16
377	 22	164.8	24.6	 16
378	 22	116.3	15.8	 16
379	 22	73.0	13.1	 16
380	 22	88.3	15.2	 16
381	 22	65.5	12.2	 16
382	 22	68.8	11.8	 16
383	 22	83.5	58.5	 16
384	 22	69.3	10.2	 16
385	 22	66.8	9.7	 16
386	 22	58.0	7.3	 16
387	 22	76.0	14.8	 16
388	 22	93.0	12.6	 16
389	 22	95.3	16.5	 16
390	 22	76.0	14.0	 16
391	 22	56.3	12.2	 16
392	 22	122.8	18.8	 16
393	 22	107.8	25.1	 16
394	 22	69.5	15.8	 16
395	 22	109.3	17.4	 16
396	 22	133.0	18.9	 16
397	 22	159.8	34.4	 16
398	 22	106.3	42.7	 16
399	 22	84.0	13.3	 16
400	 22	87.5	17.2	 16
401	 22	74.0	10.8	 16
402	 22	63.0	11.2	 16
403	 22	109.0	20.1	 16
404	 22	128.3	12.7	 16
405	 22	70.8	17.4	 16
406	 22	193.3	21.8	 16
407	 22	163.5	23.5	 16
408	 22	103.3	14.3	 16
409	 22	73.8	19.0	 16
410	 22	56.0	9.6	 16
411	 22	71.0	8.4	 16
412	 22	350.0	65.1	 16
413	 22	83.3	14.1	 16
414	 22	100.3	17.3	 16
415	 22	73.8	12.7	 16
416	 22	81.3	13.7	 16
417	 22	124.3	23.1	 16
418	 22	109.8	14.5	 16
419	 22	100.0	17.6	 16
420	 22	76.0	10.2	 16
421	 22	186.0	24.9	 16
422	 22	89.5	16.5	 16
423	 22	106.5	19.2	 16
424	 22	506.3	51.0	 16
425	 22	109.8	25.1	 16
426	 22	193.0	20.9	 16
427	 22	150.3	23.6	 16
428	 22	569.8	60.7	 16
429	 22	225.3	17.0	 16
430	 22	158.8	24.1	 16
431	 22	91.5	18.9	 16
432	 22	186.0	25.9	 16
433	 22	398.0	45.2	 16
434	 22	434.8	34.2	 16
435	 22	442.3	30.8	 16
436	 22	88.5	15.6	 16
437	 22	83.0	16.0	 16
438	 22	85.5	13.3	 16
439	 22	81.0	14.7	 16
440	 22	70.3	7.2	 16
441	 22	163.5	20.5	 16
442	 22	107.3	16.9	 16
443	 22	94.0	27.1	 16
444	 22	87.0	19.9	 16
445	 22	62.8	13.9	 16
446	 22	64.5	8.3	 16
447	 22	128.0	19.7	 16
448	 22	199.0	29.0	 16
449	 22	829.3	96.6	 16
450	 22	126.8	16.4	 16
451	 22	188.0	61.9	 16
452	 22	93.3	16.5	 16
453	 22	86.0	16.2	 16
454	 22	105.8	26.4	 16
455	 22	81.3	9.8	 16
456	 22	177.3	34.6	 16
457	 22	135.8	15.9	 16
458	 22	201.8	20.1	 16
459	 22	113.5	17.3	 16
460	 22	126.3	18.3	 16
461	 22	450.0	48.5	 16
462	 22	165.3	23.2	 16
463	 22	129.3	20.6	 16
464	 22	73.8	12.5	 16
465	 22	66.3	7.8	 16
466	 22	86.3	15.9	 16
467	 22	75.5	15.3	 16
468	 22	190.0	24.6	 16
469	 22	118.8	15.2	 16
470	 22	162.8	21.8	 16
471	 22	64.3	11.1	 16
472	 22	120.3	19.6	 16
473	 22	77.8	15.4	 16
474	 22	63.0	10.5	 16
475	 22	58.8	7.1	 16
476	 22	210.3	31.1	 16
477	 22	442.5	39.5	 16
478	 22	104.5	14.0	 16
479	 22	116.3	16.6	 16
480	 22	63.0	9.9	 16
481	 22	61.5	10.9	 16
482	 22	68.0	18.2	 16
483	 22	68.5	8.4	 16
484	 22	60.3	8.6	 16
485	 22	61.8	11.8	 16
486	 22	222.0	31.4	 16
487	 22	326.3	36.7	 16
488	 22	99.5	15.8	 16
489	 22	73.3	15.3	 16
490	 22	248.0	23.6	 20
491	 22	262.8	31.3	 16
492	 22	171.0	22.3	 16
493	 22	106.3	17.5	 16
494	 22	211.0	32.8	 16
495	 22	85.0	14.4	 16
496	 22	138.0	20.4	 16
497	 22	56.3	11.8	 16
498	 22	81.0	13.6	 16
499	 22	120.3	16.3	 16
500	 22	138.0	21.6	 16
501	 22	126.3	17.6	 16
502	 22	179.3	22.6	 16
503	 22	111.5	14.3	 16
504	 22	136.0	29.9	 16
505	 22	360.8	67.3	 16
506	 22	86.3	12.4	 16
507	 22	160.5	27.5	 16
508	 22	80.3	14.0	 16
509	 22	90.3	17.8	 16
510	 22	92.8	21.0	 16
511	 22	446.0	100.0	 16
512	 22	77.0	7.9	 16
513	 22	62.5	10.9	 16
514	 22	75.3	14.2	 16
515	 22	106.0	14.0	 16
516	 22	82.3	17.5	 16
517	 22	58.0	13.6	 16
518	 22	73.0	13.0	 16
519	 22	64.5	14.1	 16
520	 22	101.5	21.1	 16
521	 22	73.0	10.5	 16
522	 22	81.3	17.3	 16
523	 22	111.3	23.7	 16
524	 22	52.8	13.2	 16
525	 22	80.5	17.3	 16
526	 22	111.0	231.2	 16
527	 22	185.0	51.6	 16
528	 22	114.8	19.1	 16
529	 22	233.0	31.7	 16
530	 22	167.3	23.9	 16
531	 22	89.5	15.5	 16
532	 22	152.8	24.8	 16
533	 22	76.3	12.9	 16
534	 22	66.8	11.9	 16
535	 22	105.5	16.2	 16
536	 22	73.3	12.6	 16
537	 22	140.8	16.5	 16
538	 22	68.0	10.4	 16
539	 22	60.5	12.2	 16
540	 22	71.8	14.8	 16
541	 22	71.8	18.8	 16
542	 22	70.8	16.0	 16
543	 22	307.3	47.9	 16
544	 22	179.3	22.9	 16
545	 22	452.0	65.0	 16
546	 22	403.5	53.8	 16
547	 22	75.3	15.1	 16
548	 22	117.0	35.8	 16
549	 22	133.0	19.2	 16
550	 22	118.3	15.0	 16
551	 22	71.0	12.4	 16
552	 22	249.8	32.2	 16
553	 22	76.8	9.6	 16
554	 22	52.3	9.8	 16
555	 22	56.3	8.7	 16
556	 22	59.0	9.6	 16
557	 22	57.5	13.5	 16
558	 22	63.5	12.4	 16
559	 22	92.0	13.5	 16
560	 22	77.8	12.2	 16
561	 22	75.3	10.6	 16
562	 22	167.5	20.5	 16
563	 22	160.0	22.3	 16
564	 22	142.5	18.1	 16
565	 22	67.3	10.5	 16
566	 22	61.0	9.4	 16
567	 22	59.0	11.4	 16
568	 22	109.0	32.6	 16
569	 22	80.5	18.4	 16
570	 22	73.5	13.1	 16
571	 22	69.5	11.9	 16
572	 22	73.0	12.5	 16
573	 22	113.3	17.1	 16
574	 22	108.5	13.3	 16
575	 22	141.8	17.4	 16
576	 22	276.0	24.2	 16
577	 22	127.8	18.9	 16
578	 22	109.0	18.2	 16
579	 22	122.3	19.6	 16
580	 22	181.5	21.8	 16
581	 22	67.3	7.9	 16
582	 22	84.0	16.7	 16
583	 22	632.5	143.1	 16
584	 22	114.5	19.6	 16
585	 22	314.8	58.5	 16
586	 22	127.3	21.9	 16
587	 22	95.0	20.0	 16
588	 22	71.5	8.9	 16
589	 22	130.5	18.2	 16
590	 22	131.0	15.0	 16
591	 22	178.0	31.1	 16
592	 22	466.8	64.2	 16
593	 22	143.0	26.4	 16
594	 22	101.3	29.7	 16
595	 22	77.0	13.0	 16
596	 22	73.5	9.8	 16
597	 22	64.5	8.7	 16
598	 22	82.3	14.2	 16
599	 22	118.0	21.7	 16
600	 22	110.3	18.9	 16
601	 22	75.3	12.6	 16
602	 22	234.0	42.5	 16
603	 22	81.8	13.6	 16
604	 22	82.5	22.8	 16
605	 22	151.0	18.1	 16
606	 22	100.5	18.1	 16
607	 22	290.3	32.3	 16
608	 22	108.0	17.2	 20
609	 22	150.8	29.9	 16
610	 22	99.0	18.2	 16
611	 22	73.8	12.1	 16
612	 22	174.5	27.8	 16
613	 22	141.0	19.8	 16
614	 22	174.5	19.8	 16
615	 22	278.0	38.7	 16
616	 22	390.3	36.0	 16
617	 22	124.5	20.5	 16
618	 22	96.0	15.8	 16
619	 22	130.8	21.4	 16
620	 22	77.5	15.4	 16
621	 22	119.5	23.1	 16
622	 22	74.8	12.4	 16
623	 22	96.8	12.8	 16
624	 22	74.3	13.0	 16
625	 22	85.8	17.5	 16
626	 22	83.3	12.5	 16
627	 22	73.5	12.0	 16
628	 22	74.0	13.5	 16
629	 22	93.0	15.3	 16
630	 22	185.8	20.6	 16
631	 22	392.8	27.6	 16
632	 22	309.0	28.7	 16
633	 22	119.0	16.2	 16
634	 22	63.0	14.9	 16
635	 22	159.5	25.1	 16
636	 22	109.5	19.7	 16
637	 22	81.3	14.9	 16
638	 22	165.0	33.5	 16
639	 22	68.3	13.6	 16
640	 22	81.3	16.4	 16
641	 22	173.5	30.8	 16
642	 22	86.8	14.8	 16
643	 22	70.8	14.9	 16
644	 22	66.3	16.4	 16
645	 22	55.3	9.3	 16
646	 22	74.3	9.7	 16
647	 22	100.3	19.9	 16
648	 22	137.0	16.7	 16
649	 22	157.0	24.5	 16
650	 22	142.0	20.6	 16
651	 22	140.0	27.8	 16
652	 22	189.5	21.1	 16
653	 22	150.0	23.8	 16
654	 22	93.8	15.3	 16
655	 22	126.3	16.5	 16
656	 22	651.5	111.5	 16
657	 22	924.0	155.1	 16
658	 22	100.3	15.8	 16
659	 22	81.3	19.5	 16
660	 22	116.0	15.4	 16
661	 22	92.3	19.2	 16
662	 22	258.5	18.9	 16
663	 22	67.5	8.6	 16
664	 22	310.5	27.0	 16
665	 22	63.3	12.2	 16
666	 22	74.5	17.0	 16
667	 22	59.0	11.0	 16
668	 22	54.3	6.8	 16
669	 22	60.8	12.7	 16
670	 22	67.0	13.7	 16
671	 22	202.5	20.8	 16
672	 22	93.3	14.1	 16
673	 22	92.5	16.4	 16
674	 22	259.5	27.4	 16
675	 22	115.3	31.6	 16
676	 22	90.0	11.2	 16
677	 22	94.8	16.3	 16
678	 22	65.3	10.5	 16
679	 22	84.0	14.8	 16
680	 22	57.0	10.8	 16
681	 22	102.0	19.4	 16
682	 22	182.8	36.5	 16
683	 22	54.3	4.2	 16
684	 22	71.8	12.7	 16
685	 22	69.3	15.5	 16
686	 22	92.0	20.1	 16
687	 22	152.8	21.9	 16
688	 22	75.8	10.5	 16
689	 22	366.5	62.3	 16
690	 22	605.8	79.3	 16
691	 22	171.8	26.8	 16
692	 22	82.3	14.4	 16
693	 22	222.5	39.5	 16
694	 22	204.3	22.3	 16
695	 22	113.5	21.5	 16
696	 22	131.8	16.2	 16
697	 22	113.0	20.6	 16
698	 22	67.5	11.8	 16
699	 22	76.0	15.3	 16
700	 22	321.0	60.9	 16
701	 22	145.3	19.1	 16
702	 22	81.5	16.5	 16
703	 22	83.3	13.8	 16
704	 22	92.3	13.6	 16
705	 22	381.5	49.1	 16
706	 22	112.3	22.8	 16
707	 22	101.3	12.5	 16
708	 22	298.0	33.5	 16
709	 22	512.8	37.7	 16
710	 22	190.3	34.4	 16
711	 22	8845.0	1083.7	 16
  0	 23	109.8	21.5	 16
  1	 23	195.8	25.0	 16
  2	 23	96.5	18.0	 16
  3	 23	172.0	37.4	 16
  4	 23	1593.0	371.1	 16
  5	 23	74.8	11.6	 16
  6	 23	175.8	30.1	 16
  7	 23	161.3	20.9	 16
  8	 23	141.3	24.4	 16
  9	 23	90.8	21.8	 16
 10	 23	87.3	10.2	 16
 11	 23	125.3	16.1	 16
 12	 23	109.0	17.0	 16
 13	 23	121.8	15.7	 16
 14	 23	93.0	13.3	 16
 15	 23	129.5	22.0	 16
 16	 23	162.5	18.6	 16
 17	 23	136.5	21.0	 16
 18	 23	82.0	14.9	 20
 19	 23	316.8	39.5	 16
 20	 23	136.5	24.4	 16
 21	 23	77.0	13.0	 16
 22	 23	228.5	29.1	 16
 23	 23	293.5	71.0	 16
 24	 23	432.3	40.7	 16
 25	 23	320.5	55.1	 16
 26	 23	175.0	32.2	 16
 27	 23	102.8	20.5	 16
 28	 23	65.3	11.8	 16
 29	 23	99.8	17.7	 16
 30	 23	284.5	61.1	 16
 31	 23	217.8	31.5	 16
 32	 23	360.0	89.6	 16
 33	 23	358.0	87.3	 16
 34	 23	67.5	15.9	 16
 35	 23	170.8	41.8	 16
 36	 23	111.5	19.7	 16
 37	 23	165.0	27.1	 16
 38	 23	56.3	9.8	 16
 39	 23	211.8	48.1	 16
 40	 23	96.8	20.3	 16
 41	 23	85.5	14.7	 16
 42	 23	78.3	13.2	 16
 43	 23	65.0	9.4	 16
 44	 23	319.3	49.5	 16
 45	 23	240.8	31.9	 16
 46	 23	111.3	15.4	 16
 47	 23	91.0	16.9	 16
 48	 23	214.0	33.3	 16
 49	 23	92.3	9.7	 16
 50	 23	80.0	12.7	 16
 51	 23	226.3	50.9	 16
 52	 23	378.3	65.2	 16
 53	 23	449.3	106.5	 16
 54	 23	227.3	45.6	 16
 55	 23	214.3	31.9	 16
 56	 23	95.8	18.4	 16
 57	 23	161.3	24.8	 16
 58	 23	85.3	15.0	 16
 59	 23	97.3	11.2	 16
 60	 23	188.0	36.5	 16
 61	 23	131.0	17.1	 16
 62	 23	181.3	20.2	 16
 63	 23	112.5	17.7	 16
 64	 23	516.0	96.7	 16
 65	 23	109.0	24.5	 16
 66	 23	66.8	12.7	 16
 67	 23	80.5	14.1	 16
 68	 23	71.8	12.2	 16
 69	 23	110.3	37.9	 16
 70	 23	165.8	32.8	 16
 71	 23	77.3	13.4	 16
 72	 23	94.8	18.1	 16
 73	 23	138.3	16.6	 16
 74	 23	157.5	34.9	 16
 75	 23	168.5	21.4	 16
 76	 23	107.3	23.9	 16
 77	 23	53.5	7.9	 16
 78	 23	71.0	18.3	 16
 79	 23	138.0	23.8	 16
 80	 23	141.8	142.7	 16
 81	 23	67.3	12.3	 16
 82	 23	97.5	21.0	 16
 83	 23	73.0	11.9	 16
 84	 23	92.5	18.8	 16
 85	 23	97.0	18.5	 16
 86	 23	73.3	13.5	 16
 87	 23	248.0	31.6	 16
 88	 23	184.5	20.0	 16
 89	 23	125.8	26.6	 16
 90	 23	89.0	10.8	 16
 91	 23	212.5	27.5	 16
 92	 23	204.0	17.7	 16
 93	 23	395.3	65.0	 16
 94	 23	144.0	19.8	 16
 95	 23	78.3	19.7	 16
 96	 23	97.3	16.6	 16
 97	 23	125.3	26.3	 16
 98	 23	100.3	17.2	 16
 99	 23	244.0	51.2	 16
100	 23	114.3	24.9	 16
101	 23	127.8	23.6	 16
102	 23	194.3	29.6	 16
103	 23	81.8	90.8	 16
104	 23	318.3	58.8	 16
105	 23	287.8	45.6	 16
106	 23	198.5	49.5	 16
107	 23	67.3	13.8	 16
108	 23	381.8	47.5	 16
109	 23	63.8	14.5	 16
110	 23	92.0	17.8	 16
111	 23	619.5	72.2	 16
112	 23	286.3	40.6	 16
113	 23	83.3	14.7	 16
114	 23	71.3	35.0	 16
115	 23	266.3	42.9	 16
116	 23	62.3	11.9	 16
117	 23	140.5	21.8	 16
118	 23	136.5	23.4	 16
119	 23	57.0	7.2	 16
120	 23	112.5	15.6	 16
121	 23	261.0	34.6	 16
122	 23	92.0	13.8	 16
123	 23	203.5	40.3	 16
124	 23	130.8	32.8	 16
125	 23	182.5	43.5	 16
126	 23	85.3	15.7	 16
127	 23	158.5	19.3	 16
128	 23	183.0	33.1	 16
129	 23	184.3	32.3	 16
130	 23	131.0	17.7	 16
131	 23	131.3	19.5	 16
132	 23	472.5	54.6	 16
133	 23	785.3	96.3	 16
134	 23	404.0	37.8	 16
135	 23	221.0	23.7	 16
136	 23	842.3	88.1	 16
137	 23	103.5	15.2	 20
138	 23	489.5	103.2	 16
139	 23	123.8	19.8	 16
140	 23	62.0	11.2	 16
141	 23	72.3	12.6	 16
142	 23	95.5	22.4	 16
143	 23	64.0	11.2	 16
144	 23	520.0	108.0	 16
145	 23	140.5	24.0	 16
146	 23	447.5	89.9	 16
147	 23	83.5	14.5	 16
148	 23	119.8	24.5	 16
149	 23	98.0	17.4	 16
150	 23	71.0	11.0	 16
151	 23	103.5	18.3	 16
152	 23	191.3	43.7	 16
153	 23	176.5	46.4	 16
154	 23	117.3	19.3	 16
155	 23	149.5	20.7	 16
156	 23	263.8	38.2	 16
157	 23	92.5	16.7	 16
158	 23	407.3	59.9	 16
159	 23	157.3	21.9	 16
160	 23	1634.8	319.6	 16
161	 23	1118.3	178.0	 16
162	 23	72.3	9.9	 16
163	 23	72.0	11.2	 16
164	 23	586.0	142.1	 16
165	 23	75.5	14.0	 16
166	 23	62.5	8.0	 16
167	 23	240.5	45.4	 16
168	 23	78.5	14.6	 16
169	 23	179.0	30.2	 16
170	 23	168.3	19.7	 16
171	 23	66.0	6.7	 16
172	 23	211.8	31.6	 16
173	 23	129.3	16.1	 16
174	 23	242.8	41.5	 16
175	 23	154.5	27.2	 16
176	 23	138.0	31.1	 16
177	 23	142.0	31.1	 16
178	 23	116.0	16.3	 16
179	 23	152.3	37.2	 16
180	 23	134.5	16.6	 16
181	 23	209.3	25.6	 16
182	 23	217.0	25.7	 16
183	 23	71.5	14.2	 16
184	 23	140.8	18.0	 16
185	 23	95.0	16.1	 16
186	 23	70.8	12.8	 16
187	 23	139.0	25.9	 16
188	 23	290.5	51.0	 16
189	 23	284.3	32.2	 16
190	 23	153.3	14.2	 16
191	 23	173.5	23.2	 16
192	 23	96.8	15.3	 16
193	 23	107.8	12.8	 16
194	 23	97.0	21.0	 16
195	 23	81.8	11.8	 16
196	 23	595.5	74.1	 16
197	 23	86.3	16.3	 16
198	 23	87.5	20.8	 16
199	 23	90.0	14.4	 16
200	 23	224.3	49.8	 16
201	 23	81.3	15.3	 16
202	 23	63.3	10.4	 16
203	 23	360.3	29.9	 16
204	 23	160.5	28.0	 16
205	 23	211.8	31.3	 16
206	 23	303.5	38.3	 16
207	 23	74.3	14.7	 16
208	 23	123.0	9.6	 16
209	 23	197.3	22.4	 16
210	 23	277.5	38.4	 16
211	 23	574.3	70.9	 16
212	 23	114.0	20.3	 16
213	 23	868.3	117.5	 16
214	 23	88.0	15.8	 16
215	 23	989.5	124.1	 16
216	 23	173.3	24.3	 16
217	 23	101.0	13.1	 16
218	 23	71.5	13.5	 16
219	 23	1452.0	283.7	 16
220	 23	94.0	20.8	 16
221	 23	104.0	16.6	 16
222	 23	272.5	67.1	 16
223	 23	73.5	11.5	 16
224	 23	762.3	180.0	 16
225	 23	204.5	31.2	 16
226	 23	135.5	20.5	 16
227	 23	126.5	24.8	 16
228	 23	136.3	27.2	 16
229	 23	126.3	17.8	 16
230	 23	141.0	18.1	 16
231	 23	763.3	83.3	 16
232	 23	441.3	41.0	 16
233	 23	253.3	30.6	 16
234	 23	80.5	16.2	 16
235	 23	717.3	63.6	 16
236	 23	113.0	23.2	 16
237	 23	76.3	41.0	 16
238	 23	65.3	12.5	 16
239	 23	386.0	35.5	 16
240	 23	150.3	37.2	 16
241	 23	143.5	20.3	 16
242	 23	81.5	14.3	 16
243	 23	100.3	16.1	 16
244	 23	260.3	43.3	 16
245	 23	287.3	49.3	 16
246	 23	65.8	10.6	 16
247	 23	59.3	10.2	 16
248	 23	280.3	45.2	 16
249	 23	154.0	25.4	 16
250	 23	229.5	21.7	 16
251	 23	65.0	6.4	 16
252	 23	181.3	28.4	 16
253	 23	65.5	10.3	 16
254	 23	75.3	12.4	 16
255	 23	60.0	7.8	 16
256	 23	213.8	31.4	 20
257	 23	126.3	17.6	 16
258	 23	165.0	19.8	 16
259	 23	311.5	55.3	 16
260	 23	3034.8	245.9	 16
261	 23	2811.3	296.6	 16
262	 23	2315.0	531.3	 16
263	 23	78.3	12.9	 16
264	 23	80.3	13.6	 16
265	 23	82.0	14.8	 16
266	 23	293.3	56.0	 16
267	 23	111.5	18.4	 16
268	 23	135.0	19.0	 16
269	 23	131.0	20.2	 16
270	 23	227.0	45.5	 16
271	 23	90.5	19.0	 16
272	 23	514.8	149.5	 16
273	 23	7422.0	1243.5	 16
274	 23	75.5	13.4	 16
275	 23	136.0	22.2	 16
276	 23	238.5	39.5	 16
277	 23	74.8	17.8	 16
278	 23	312.5	58.3	 16
279	 23	1182.3	173.3	 16
280	 23	113.0	16.9	 16
281	 23	109.8	20.5	 16
282	 23	220.3	28.0	 16
283	 23	349.0	48.1	 16
284	 23	112.3	59.5	 16
285	 23	78.0	11.7	 16
286	 23	110.0	15.2	 16
287	 23	196.5	43.8	 16
288	 23	65.3	11.0	 16
289	 23	522.5	76.0	 16
290	 23	811.5	179.4	 16
291	 23	199.5	26.2	 16
292	 23	162.0	15.1	 16
293	 23	200.0	37.7	 16
294	 23	218.8	42.8	 16
295	 23	186.0	41.9	 16
296	 23	82.0	15.2	 16
297	 23	72.5	16.3	 16
298	 23	247.3	27.0	 16
299	 23	1709.8	272.2	 16
300	 23	102.8	15.5	 16
301	 23	103.3	16.0	 16
302	 23	1667.0	327.7	 16
303	 23	85.3	14.6	 16
304	 23	219.8	39.6	 16
305	 23	191.3	20.5	 16
306	 23	472.8	59.1	 16
307	 23	353.5	71.6	 16
308	 23	79.5	14.5	 16
309	 23	85.3	13.8	 16
310	 23	113.5	15.8	 16
311	 23	378.0	60.0	 16
312	 23	418.8	80.3	 16
313	 23	80.0	13.4	 16
314	 23	332.3	75.5	 16
315	 23	66.0	13.1	 16
316	 23	123.3	18.4	 16
317	 23	102.3	19.5	 16
318	 23	99.0	12.4	 16
319	 23	106.8	28.3	 16
320	 23	123.5	18.6	 16
321	 23	90.3	16.9	 16
322	 23	145.0	21.9	 16
323	 23	122.3	21.8	 16
324	 23	172.0	19.6	 16
325	 23	617.8	75.9	 16
326	 23	136.8	26.5	 16
327	 23	73.0	12.4	 16
328	 23	392.5	54.8	 16
329	 23	101.5	19.9	 16
330	 23	308.5	41.2	 16
331	 23	88.8	13.5	 16
332	 23	123.3	13.7	 16
333	 23	86.0	13.4	 16
334	 23	78.0	17.8	 16
335	 23	72.0	14.2	 16
336	 23	96.5	16.7	 16
337	 23	103.8	20.8	 16
338	 23	164.3	20.2	 16
339	 23	66.3	14.8	 16
340	 23	81.3	11.1	 16
341	 23	96.0	17.1	 16
342	 23	142.0	14.7	 16
343	 23	144.8	19.8	 16
344	 23	194.3	36.1	 16
345	 23	592.0	49.9	 16
346	 23	102.5	16.3	 16
347	 23	85.0	14.4	 16
348	 23	156.3	19.8	 16
349	 23	255.3	38.0	 16
350	 23	176.3	26.1	 16
351	 23	64.0	13.9	 16
352	 23	502.3	72.7	 16
353	 23	78.8	12.0	 16
354	 23	427.5	71.8	 16
355	 23	75.0	10.5	 16
356	 23	253.0	33.8	 16
357	 23	130.0	17.7	 16
358	 23	780.8	118.7	 16
359	 23	309.5	29.0	 16
360	 23	208.3	25.7	 16
361	 23	300.8	35.9	 16
362	 23	809.0	140.4	 16
363	 23	208.5	34.5	 16
364	 23	102.5	14.4	 16
365	 23	419.0	73.0	 16
366	 23	59.3	10.9	 16
367	 23	56.0	8.6	 16
368	 23	72.3	15.2	 16
369	 23	71.8	12.4	 16
370	 23	139.8	21.8	 16
371	 23	62.5	11.0	 16
372	 23	432.8	63.8	 16
373	 23	483.3	61.4	 16
374	 23	65.3	9.0	 20
375	 23	99.5	13.3	 16
376	 23	71.3	13.0	 16
377	 23	424.3	80.3	 16
378	 23	174.3	28.7	 16
379	 23	243.8	42.2	 16
380	 23	187.0	31.7	 16
381	 23	3390.3	664.1	 16
382	 23	188.0	25.7	 16
383	 23	83.3	14.6	 16
384	 23	83.8	17.0	 16
385	 23	129.0	22.7	 16
386	 23	111.0	21.6	 16
387	 23	94.3	14.7	 16
388	 23	69.8	12.0	 16
389	 23	96.8	15.5	 16
390	 23	102.0	16.4	 16
391	 23	915.8	253.3	 16
392	 23	78.3	10.2	 16
393	 23	107.3	24.7	 16
394	 23	258.0	47.6	 16
395	 23	156.3	26.4	 16
396	 23	110.0	17.7	 16
397	 23	749.5	108.4	 16
398	 23	234.0	70.8	 16
399	 23	288.3	40.5	 16
400	 23	1018.3	184.4	 16
401	 23	138.3	23.7	 16
402	 23	1583.8	323.3	 16
403	 23	6021.0	954.0	 16
404	 23	120.0	13.7	 16
405	 23	2402.3	502.2	 16
406	 23	77.3	6.9	 16
407	 23	128.3	19.9	 16
408	 23	182.5	21.9	 16
409	 23	108.5	15.7	 16
410	 23	128.5	21.6	 16
411	 23	136.3	23.1	 16
412	 23	482.8	104.2	 16
413	 23	650.0	135.8	 16
414	 23	64.5	12.8	 16
415	 23	114.0	17.8	 16
416	 23	102.3	17.0	 16
417	 23	132.3	26.1	 16
418	 23	252.0	25.7	 16
419	 23	131.8	18.8	 16
420	 23	57.5	9.1	 16
421	 23	80.8	16.4	 16
422	 23	452.0	36.9	 16
423	 23	80.3	17.5	 16
424	 23	64.0	11.3	 16
425	 23	91.5	12.5	 16
426	 23	2823.3	341.5	 16
427	 23	272.8	42.0	 16
428	 23	397.5	34.8	 16
429	 23	4547.8	693.7	 16
430	 23	1620.5	325.2	 16
431	 23	90.0	17.0	 16
432	 23	107.8	13.8	 16
433	 23	104.0	17.3	 16
434	 23	304.8	33.4	 16
435	 23	518.0	78.3	 16
436	 23	293.8	63.0	 16
437	 23	211.0	25.3	 16
438	 23	217.5	51.9	 16
439	 23	466.5	52.7	 16
440	 23	82.0	13.5	 16
441	 23	198.5	20.2	 16
442	 23	138.5	20.6	 16
443	 23	95.3	14.0	 16
444	 23	122.0	16.0	 16
445	 23	262.8	25.7	 16
446	 23	339.5	33.8	 16
447	 23	920.5	62.2	 16
448	 23	281.5	27.7	 16
449	 23	149.3	25.6	 16
450	 23	418.8	59.9	 16
451	 23	285.5	32.3	 16
452	 23	317.3	50.2	 16
453	 23	210.3	30.6	 16
454	 23	141.3	17.4	 16
455	 23	986.0	129.3	 16
456	 23	127.3	15.3	 16
457	 23	166.0	14.1	 16
458	 23	608.3	71.6	 16
459	 23	538.5	78.6	 16
460	 23	176.5	28.7	 16
461	 23	678.0	67.9	 16
462	 23	208.0	32.0	 16
463	 23	111.3	16.9	 16
464	 23	231.0	25.6	 16
465	 23	75.3	14.3	 16
466	 23	66.0	13.8	 16
467	 23	78.3	14.7	 16
468	 23	632.5	56.5	 16
469	 23	127.8	15.9	 16
470	 23	69.0	15.6	 16
471	 23	86.0	14.9	 16
472	 23	857.3	77.6	 16
473	 23	213.0	30.2	 16
474	 23	367.3	39.9	 16
475	 23	478.3	75.4	 16
476	 23	197.5	30.1	 16
477	 23	365.0	40.4	 16
478	 23	135.8	17.0	 16
479	 23	640.0	85.2	 16
480	 23	107.3	12.8	 16
481	 23	67.5	9.5	 16
482	 23	98.3	19.8	 16
483	 23	75.5	10.1	 16
484	 23	510.3	84.8	 16
485	 23	266.3	37.6	 16
486	 23	182.3	31.2	 16
487	 23	189.8	38.7	 16
488	 23	91.0	12.7	 16
489	 23	921.0	113.7	 16
490	 23	153.0	20.3	 16
491	 23	136.3	25.8	 16
492	 23	147.0	22.0	 16
493	 23	1087.8	135.1	 20
494	 23	144.3	21.9	 16
495	 23	109.3	15.5	 16
496	 23	81.8	18.2	 16
497	 23	1126.3	286.8	 16
498	 23	125.3	25.8	 16
499	 23	214.3	40.5	 16
500	 23	116.3	23.2	 16
501	 23	70.5	10.4	 16
502	 23	202.5	40.8	 16
503	 23	91.3	15.1	 16
504	 23	354.8	63.0	 16
505	 23	603.3	89.7	 16
506	 23	176.3	39.5	 16
507	 23	139.0	35.8	 16
508	 23	66.3	13.7	 16
509	 23	111.5	14.3	 16
510	 23	120.3	14.0	 16
511	 23	810.3	150.1	 16
512	 23	88.5	16.9	 16
513	 23	120.0	22.7	 16
514	 23	53.5	9.0	 16
515	 23	64.5	12.5	 16
516	 23	120.5	23.3	 16
517	 23	75.0	14.4	 16
518	 23	126.0	27.2	 16
519	 23	80.8	17.4	 16
520	 23	142.5	24.0	 16
521	 23	1130.3	98.1	 16
522	 23	1662.5	360.2	 16
523	 23	165.5	30.5	 16
524	 23	505.5	76.1	 16
525	 23	81.0	17.4	 16
526	 23	82.5	11.6	 16
527	 23	314.3	41.7	 16
528	 23	365.0	44.5	 16
529	 23	375.0	48.4	 16
530	 23	513.3	101.6	 16
531	 23	113.0	16.6	 16
532	 23	6887.5	1512.0	 16
533	 23	183.3	37.8	 16
534	 23	317.5	50.2	 16
535	 23	742.5	83.5	 16
536	 23	148.5	26.7	 16
537	 23	424.3	49.0	 16
538	 23	104.5	19.5	 16
539	 23	94.5	15.5	 16
540	 23	251.8	29.4	 16
541	 23	85.3	20.1	 16
542	 23	80.5	12.7	 16
543	 23	3039.3	467.5	 16
544	 23	165.0	21.5	 16
545	 23	82.0	19.2	 16
546	 23	76.3	10.7	 16
547	 23	155.8	20.7	 16
548	 23	72.8	13.8	 16
549	 23	294.8	34.9	 16
550	 23	112.5	15.7	 16
551	 23	492.0	65.2	 16
552	 23	98.8	17.9	 16
553	 23	182.5	26.2	 16
554	 23	135.3	28.9	 16
555	 23	134.0	25.2	 16
556	 23	338.0	62.8	 16
557	 23	182.3	38.3	 16
558	 23	169.5	25.9	 16
559	 23	68.5	9.7	 16
560	 23	79.5	12.8	 16
561	 23	7334.5	545.9	 16
562	 23	94.3	17.3	 16
563	 23	182.5	20.1	 16
564	 23	196.3	25.9	 16
565	 23	432.0	64.2	 16
566	 23	903.0	152.4	 16
567	 23	826.5	109.5	 16
568	 23	708.5	99.0	 16
569	 23	131.8	19.4	 16
570	 23	151.0	20.2	 16
571	 23	85.3	16.8	 16
572	 23	231.5	29.2	 16
573	 23	1944.3	312.3	 16
574	 23	622.5	102.9	 16
575	 23	1105.3	219.5	 16
576	 23	119.5	25.6	 16
577	 23	81.5	112.3	 16
578	 23	1207.8	278.6	 16
579	 23	102.8	12.6	 16
580	 23	75.5	10.2	 16
581	 23	739.8	122.5	 16
582	 23	595.3	101.0	 16
583	 23	100.3	12.2	 16
584	 23	263.8	46.9	 16
585	 23	91.3	15.6	 16
586	 23	1472.3	265.4	 16
587	 23	2011.5	292.7	 16
588	 23	123.3	15.4	 16
589	 23	1471.5	263.4	 16
590	 23	758.8	134.7	 16
591	 23	117.0	56.4	 16
592	 23	619.0	117.2	 16
593	 23	517.5	74.7	 16
594	 23	993.3	146.7	 16
595	 23	84.5	10.2	 16
596	 23	164.3	32.7	 16
597	 23	61.8	9.3	 16
598	 23	96.5	17.4	 16
599	 23	301.0	39.5	 16
600	 23	143.8	16.0	 16
601	 23	73.5	12.3	 16
602	 23	91.5	13.9	 16
603	 23	2195.5	479.6	 16
604	 23	76.0	12.0	 16
605	 23	283.0	34.0	 16
606	 23	192.5	25.5	 16
607	 23	165.0	21.5	 16
608	 23	677.5	56.3	 16
609	 23	208.0	25.7	 16
610	 23	162.0	22.1	 16
611	 23	529.3	105.3	 16
612	 23	768.0	124.5	 20
613	 23	181.5	31.6	 16
614	 23	1052.3	105.1	 16
615	 23	248.5	36.9	 16
616	 23	242.3	36.4	 16
617	 23	154.5	54.0	 16
618	 23	406.0	42.4	 16
619	 23	331.5	68.4	 16
620	 23	162.5	25.8	 16
621	 23	135.5	21.1	 16
622	 23	205.3	40.5	 16
623	 23	288.5	30.8	 16
624	 23	176.0	29.1	 16
625	 23	146.3	13.7	 16
626	 23	185.5	29.8	 16
627	 23	114.3	13.8	 16
628	 23	137.5	22.0	 16
629	 23	74.5	10.5	 16
630	 23	75.0	12.6	 16
631	 23	227.8	28.3	 16
632	 23	110.8	13.1	 16
633	 23	159.0	23.8	 16
634	 23	1157.8	140.1	 16
635	 23	666.0	55.5	 16
636	 23	394.0	56.5	 16
637	 23	394.0	53.1	 16
638	 23	134.5	41.0	 16
639	 23	188.3	24.7	 16
640	 23	1113.8	114.3	 16
641	 23	83.3	16.0	 16
642	 23	91.3	11.5	 16
643	 23	87.0	12.6	 16
644	 23	430.8	61.5	 16
645	 23	137.5	21.6	 16
646	 23	336.5	57.2	 16
647	 23	153.5	55.2	 16
648	 23	211.0	30.3	 16
649	 23	193.0	40.0	 16
650	 23	181.8	96.0	 16
651	 23	172.3	30.4	 16
652	 23	105.5	17.5	 16
653	 23	106.0	12.8	 16
654	 23	93.0	17.7	 16
655	 23	102.5	39.4	 16
656	 23	133.8	21.6	 16
657	 23	153.3	22.1	 16
658	 23	154.3	26.8	 16
659	 23	274.0	37.6	 16
660	 23	190.5	16.7	 16
661	 23	67.8	12.1	 16
662	 23	308.0	24.5	 16
663	 23	190.0	25.8	 16
664	 23	181.3	28.0	 16
665	 23	103.5	14.2	 16
666	 23	93.0	11.6	 16
667	 23	97.3	16.4	 16
668	 23	61.0	15.4	 16
669	 23	106.3	19.1	 16
670	 23	93.5	18.6	 16
671	 23	193.5	24.7	 16
672	 23	106.8	13.9	 16
673	 23	85.3	11.8	 16
674	 23	78.0	16.2	 16
675	 23	102.5	14.2	 16
676	 23	258.3	24.2	 16
677	 23	168.3	11.7	 16
678	 23	89.5	18.6	 16
679	 23	63.3	9.2	 16
680	 23	70.0	14.5	 16
681	 23	200.8	27.4	 16
682	 23	1722.3	166.0	 16
683	 23	141.3	18.2	 16
684	 23	310.0	48.0	 16
685	 23	382.3	47.3	 16
686	 23	116.5	11.7	 16
687	 23	121.0	18.9	 16
688	 23	417.3	43.3	 16
689	 23	164.3	26.5	 16
690	 23	116.5	27.5	 16
691	 23	169.0	33.1	 16
692	 23	67.5	15.7	 16
693	 23	138.3	24.4	 16
694	 23	725.0	91.5	 16
695	 23	183.0	36.7	 16
696	 23	57.3	9.0	 16
697	 23	80.0	12.5	 16
698	 23	65.0	7.7	 16
699	 23	70.5	11.7	 16
700	 23	457.8	50.6	 16
701	 23	354.0	43.2	 16
702	 23	272.5	22.6	 16
703	 23	513.5	74.2	 16
704	 23	172.5	20.7	 16
705	 23	195.0	25.6	 16
706	 23	198.3	28.7	 16
707	 23	198.5	32.8	 16
708	 23	226.5	32.2	 16
709	 23	227.0	24.6	 16
710	 23	123.8	14.9	 16
711	 23	114.5	19.1	 16
  0	 24	3637.0	580.4	 16
  1	 24	94.8	16.1	 16
  2	 24	87.0	16.3	 16
  3	 24	77.0	13.1	 16
  4	 24	292.5	61.0	 16
  5	 24	72.3	15.9	 16
  6	 24	163.5	15.2	 16
  7	 24	193.8	29.4	 16
  8	 24	134.8	20.6	 16
  9	 24	82.3	17.2	 16
 10	 24	82.0	16.8	 16
 11	 24	219.5	29.2	 16
 12	 24	89.5	13.7	 16
 13	 24	374.8	28.5	 16
 14	 24	95.8	18.8	 16
 15	 24	214.0	25.1	 16
 16	 24	98.0	14.8	 16
 17	 24	70.5	12.1	 16
 18	 24	109.8	16.4	 16
 19	 24	136.5	14.7	 16
 20	 24	120.0	20.8	 16
 21	 24	58.5	8.6	 16
 22	 24	151.3	26.3	 20
 23	 24	195.3	18.2	 16
 24	 24	568.5	38.4	 16
 25	 24	471.8	82.9	 16
 26	 24	84.5	19.1	 16
 27	 24	78.5	13.6	 16
 28	 24	75.5	16.2	 16
 29	 24	165.5	44.9	 16
 30	 24	182.0	23.8	 16
 31	 24	405.3	62.5	 16
 32	 24	139.8	26.3	 16
 33	 24	144.3	20.9	 16
 34	 24	77.8	21.5	 16
 35	 24	93.5	19.6	 16
 36	 24	216.8	40.8	 16
 37	 24	69.5	13.8	 16
 38	 24	81.8	22.4	 16
 39	 24	83.5	14.8	 16
 40	 24	71.5	12.0	 16
 41	 24	89.0	41.7	 16
 42	 24	66.3	8.5	 16
 43	 24	90.8	25.3	 16
 44	 24	130.8	21.2	 16
 45	 24	420.3	63.8	 16
 46	 24	107.3	19.9	 16
 47	 24	109.8	25.4	 16
 48	 24	106.3	16.4	 16
 49	 24	150.8	18.8	 16
 50	 24	77.3	14.1	 16
 51	 24	119.5	14.4	 16
 52	 24	460.3	63.1	 16
 53	 24	417.5	43.7	 16
 54	 24	303.8	80.4	 16
 55	 24	368.8	45.6	 16
 56	 24	69.5	17.4	 16
 57	 24	85.0	13.1	 16
 58	 24	91.3	16.4	 16
 59	 24	80.3	13.9	 16
 60	 24	79.3	15.9	 16
 61	 24	106.0	68.9	 16
 62	 24	90.5	12.2	 16
 63	 24	105.0	25.5	 16
 64	 24	136.0	20.7	 16
 65	 24	83.0	11.3	 16
 66	 24	81.5	13.4	 16
 67	 24	75.5	11.2	 16
 68	 24	69.8	17.3	 16
 69	 24	109.3	17.5	 16
 70	 24	188.3	22.9	 16
 71	 24	67.5	12.5	 16
 72	 24	89.3	15.6	 16
 73	 24	150.3	18.4	 16
 74	 24	107.0	21.3	 16
 75	 24	99.0	17.8	 16
 76	 24	125.3	15.9	 16
 77	 24	63.3	8.1	 16
 78	 24	74.3	14.3	 16
 79	 24	90.3	19.9	 16
 80	 24	94.3	17.5	 16
 81	 24	64.8	11.9	 16
 82	 24	107.3	9.0	 16
 83	 24	74.0	11.1	 16
 84	 24	63.3	12.8	 16
 85	 24	81.8	12.9	 16
 86	 24	77.0	16.3	 16
 87	 24	82.0	11.9	 16
 88	 24	123.3	20.3	 16
 89	 24	83.3	13.3	 16
 90	 24	73.3	20.7	 16
 91	 24	115.5	19.6	 16
 92	 24	113.0	21.1	 16
 93	 24	117.5	19.8	 16
 94	 24	195.5	24.5	 16
 95	 24	93.5	24.9	 16
 96	 24	82.3	13.8	 16
 97	 24	82.5	12.9	 16
 98	 24	94.5	16.5	 16
 99	 24	98.0	21.6	 16
100	 24	88.3	14.7	 16
101	 24	117.5	19.6	 16
102	 24	151.3	22.2	 16
103	 24	77.3	12.5	 16
104	 24	167.5	21.7	 16
105	 24	148.8	16.9	 16
106	 24	106.5	13.5	 16
107	 24	75.0	11.9	 16
108	 24	88.0	12.4	 16
109	 24	56.3	8.6	 16
110	 24	83.0	12.8	 16
111	 24	155.5	24.7	 16
112	 24	208.3	68.9	 16
113	 24	75.0	11.7	 16
114	 24	64.5	8.6	 16
115	 24	68.3	13.9	 16
116	 24	63.3	9.7	 16
117	 24	98.5	22.0	 16
118	 24	74.8	13.9	 16
119	 24	60.3	10.0	 16
120	 24	87.3	10.8	 16
121	 24	112.3	22.4	 16
122	 24	78.5	24.3	 16
123	 24	88.8	14.2	 16
124	 24	80.8	20.3	 16
125	 24	67.3	8.5	 16
126	 24	85.3	15.5	 16
127	 24	127.8	22.0	 16
128	 24	102.3	14.5	 16
129	 24	114.5	16.8	 16
130	 24	135.5	14.5	 16
131	 24	91.0	20.5	 16
132	 24	134.8	18.5	 16
133	 24	355.5	34.4	 16
134	 24	506.0	41.6	 16
135	 24	142.3	26.2	 16
136	 24	376.8	38.3	 16
137	 24	108.8	17.6	 16
138	 24	227.8	25.9	 16
139	 24	104.3	18.9	 16
140	 24	68.8	15.6	 20
141	 24	57.5	9.9	 16
142	 24	62.5	13.8	 16
143	 24	64.0	11.1	 16
144	 24	186.3	33.9	 16
145	 24	143.0	20.5	 16
146	 24	237.3	44.4	 16
147	 24	69.3	15.3	 16
148	 24	67.3	16.0	 16
149	 24	59.3	11.4	 16
150	 24	76.8	18.9	 16
151	 24	80.8	16.7	 16
152	 24	73.3	13.6	 16
153	 24	77.0	14.5	 16
154	 24	76.0	11.7	 16
155	 24	107.3	22.3	 16
156	 24	121.3	14.3	 16
157	 24	160.5	30.3	 16
158	 24	145.8	18.7	 16
159	 24	80.0	12.1	 16
160	 24	497.3	93.6	 16
161	 24	395.0	58.7	 16
162	 24	66.3	9.7	 16
163	 24	58.8	11.8	 16
164	 24	192.3	45.3	 16
165	 24	68.5	9.1	 16
166	 24	86.8	20.7	 16
167	 24	113.3	14.3	 16
168	 24	100.0	15.1	 16
169	 24	96.0	20.6	 16
170	 24	94.0	16.2	 16
171	 24	62.3	12.8	 16
172	 24	119.3	17.5	 16
173	 24	1058.5	175.4	 16
174	 24	123.0	17.5	 16
175	 24	58.5	9.3	 16
176	 24	73.0	9.2	 16
177	 24	86.0	11.0	 16
178	 24	74.5	15.3	 16
179	 24	82.8	16.1	 16
180	 24	246.8	34.9	 16
181	 24	193.8	21.2	 16
182	 24	132.8	34.4	 16
183	 24	95.3	17.0	 16
184	 24	139.0	17.4	 16
185	 24	65.3	9.2	 16
186	 24	71.8	11.2	 16
187	 24	104.8	20.5	 16
188	 24	367.8	44.8	 16
189	 24	490.0	38.0	 16
190	 24	218.5	34.8	 16
191	 24	212.0	22.9	 16
192	 24	131.5	17.2	 16
193	 24	124.0	17.6	 16
194	 24	119.5	19.5	 16
195	 24	84.0	14.8	 16
196	 24	241.3	20.2	 16
197	 24	109.3	25.5	 16
198	 24	105.5	18.9	 16
199	 24	91.8	15.0	 16
200	 24	150.8	19.4	 16
201	 24	68.8	14.7	 16
202	 24	70.0	11.4	 16
203	 24	123.8	16.2	 16
204	 24	85.5	26.2	 16
205	 24	83.0	12.5	 16
206	 24	104.8	22.4	 16
207	 24	70.3	12.1	 16
208	 24	79.3	12.8	 16
209	 24	183.8	30.4	 16
210	 24	100.0	39.3	 16
211	 24	98.8	55.1	 16
212	 24	103.5	18.9	 16
213	 24	184.8	24.7	 16
214	 24	67.5	11.0	 16
215	 24	277.0	46.0	 16
216	 24	71.3	15.0	 16
217	 24	64.5	11.6	 16
218	 24	63.0	9.2	 16
219	 24	314.3	37.0	 16
220	 24	84.5	15.9	 16
221	 24	155.8	19.1	 16
222	 24	80.3	16.4	 16
223	 24	70.3	13.0	 16
224	 24	106.0	20.1	 16
225	 24	146.5	38.8	 16
226	 24	76.3	11.2	 16
227	 24	108.5	18.6	 16
228	 24	77.0	12.9	 16
229	 24	87.3	18.9	 16
230	 24	157.5	23.1	 16
231	 24	263.5	35.7	 16
232	 24	709.3	46.1	 16
233	 24	292.0	39.3	 16
234	 24	83.5	12.6	 16
235	 24	153.0	25.2	 16
236	 24	76.0	15.8	 16
237	 24	68.8	9.7	 16
238	 24	71.3	14.9	 16
239	 24	836.5	84.5	 16
240	 24	111.5	17.5	 16
241	 24	138.8	24.1	 16
242	 24	79.5	14.8	 16
243	 24	75.3	13.6	 16
244	 24	81.0	11.7	 16
245	 24	116.8	19.8	 16
246	 24	104.8	55.1	 16
247	 24	71.5	13.8	 16
248	 24	149.5	26.2	 16
249	 24	112.5	13.9	 16
250	 24	90.3	12.3	 16
251	 24	69.5	9.6	 16
252	 24	140.8	27.2	 16
253	 24	63.5	7.1	 16
254	 24	72.3	11.8	 16
255	 24	74.0	10.2	 16
256	 24	283.3	39.1	 16
257	 24	147.8	24.7	 16
258	 24	220.8	25.6	 16
259	 24	140.3	19.9	 20
260	 24	1162.8	108.5	 16
261	 24	1070.0	109.7	 16
262	 24	764.5	187.4	 16
263	 24	72.0	10.3	 16
264	 24	66.0	9.4	 16
265	 24	67.0	10.3	 16
266	 24	85.8	20.1	 16
267	 24	140.0	56.6	 16
268	 24	150.8	24.3	 16
269	 24	142.3	22.9	 16
270	 24	122.8	23.7	 16
271	 24	92.3	14.4	 16
272	 24	156.5	28.9	 16
273	 24	1745.0	432.1	 16
274	 24	73.5	11.9	 16
275	 24	105.0	19.9	 16
276	 24	162.0	27.7	 16
277	 24	66.3	10.8	 16
278	 24	169.0	25.5	 16
279	 24	283.3	45.0	 16
280	 24	95.5	14.1	 16
281	 24	111.8	23.6	 16
282	 24	250.5	37.3	 16
283	 24	282.8	38.5	 16
284	 24	88.3	15.4	 16
285	 24	68.5	9.8	 16
286	 24	86.3	17.3	 16
287	 24	58.0	9.5	 16
288	 24	71.3	14.2	 16
289	 24	754.0	108.9	 16
290	 24	159.0	35.0	 16
291	 24	273.3	49.3	 16
292	 24	250.3	18.9	 16
293	 24	110.0	17.9	 16
294	 24	171.3	26.7	 16
295	 24	105.0	16.8	 16
296	 24	77.5	13.2	 16
297	 24	74.3	14.8	 16
298	 24	107.3	22.3	 16
299	 24	320.3	57.9	 16
300	 24	89.3	16.5	 16
301	 24	73.3	15.6	 16
302	 24	130.3	14.0	 16
303	 24	121.0	22.5	 16
304	 24	141.0	24.4	 16
305	 24	154.0	24.3	 16
306	 24	126.8	19.3	 16
307	 24	125.3	21.1	 16
308	 24	59.3	10.4	 16
309	 24	94.3	25.4	 16
310	 24	149.0	18.7	 16
311	 24	225.5	36.9	 16
312	 24	106.8	14.1	 16
313	 24	95.0	16.7	 16
314	 24	186.8	37.3	 16
315	 24	78.0	13.6	 16
316	 24	103.0	11.8	 16
317	 24	75.0	15.5	 16
318	 24	81.0	16.9	 16
319	 24	79.3	14.5	 16
320	 24	152.5	13.6	 16
321	 24	135.3	88.0	 16
322	 24	95.8	21.4	 16
323	 24	87.3	12.9	 16
324	 24	89.0	14.4	 16
325	 24	175.0	27.3	 16
326	 24	300.8	35.9	 16
327	 24	77.3	13.7	 16
328	 24	323.0	36.6	 16
329	 24	85.0	18.2	 16
330	 24	122.3	18.1	 16
331	 24	87.5	15.1	 16
332	 24	102.8	11.3	 16
333	 24	63.3	11.6	 16
334	 24	64.5	12.3	 16
335	 24	76.0	12.3	 16
336	 24	74.3	10.6	 16
337	 24	85.8	12.1	 16
338	 24	105.8	16.7	 16
339	 24	56.5	11.8	 16
340	 24	86.0	15.2	 16
341	 24	142.3	25.1	 16
342	 24	120.8	17.1	 16
343	 24	309.5	80.0	 16
344	 24	130.3	20.2	 16
345	 24	524.5	45.2	 16
346	 24	141.0	22.2	 16
347	 24	96.3	19.2	 16
348	 24	140.5	25.8	 16
349	 24	156.3	27.0	 16
350	 24	101.3	17.5	 16
351	 24	56.5	9.3	 16
352	 24	91.3	15.0	 16
353	 24	92.3	12.4	 16
354	 24	109.3	22.0	 16
355	 24	87.8	14.4	 16
356	 24	378.5	36.2	 16
357	 24	98.5	12.4	 16
358	 24	178.5	28.8	 16
359	 24	197.8	24.7	 16
360	 24	147.5	27.0	 16
361	 24	360.3	32.5	 16
362	 24	266.0	34.2	 16
363	 24	98.5	15.1	 16
364	 24	112.5	13.2	 16
365	 24	201.3	28.3	 16
366	 24	62.5	11.5	 16
367	 24	60.3	9.9	 16
368	 24	59.3	12.9	 16
369	 24	64.8	12.0	 16
370	 24	141.0	20.5	 16
371	 24	67.5	11.9	 16
372	 24	154.3	24.7	 16
373	 24	176.8	23.6	 16
374	 24	62.0	9.9	 16
375	 24	91.5	14.6	 16
376	 24	74.3	10.8	 16
377	 24	204.5	20.4	 16
378	 24	304.0	86.5	 20
379	 24	359.5	47.2	 16
380	 24	113.8	17.7	 16
381	 24	641.8	104.2	 16
382	 24	142.8	20.2	 16
383	 24	77.5	12.7	 16
384	 24	93.5	14.7	 16
385	 24	77.8	14.7	 16
386	 24	68.5	8.8	 16
387	 24	160.8	27.5	 16
388	 24	61.8	10.3	 16
389	 24	87.3	14.6	 16
390	 24	103.0	18.7	 16
391	 24	165.3	43.8	 16
392	 24	62.0	9.8	 16
393	 24	66.5	11.2	 16
394	 24	77.5	15.2	 16
395	 24	77.8	12.3	 16
396	 24	77.3	14.5	 16
397	 24	148.3	21.9	 16
398	 24	91.3	11.9	 16
399	 24	114.8	18.9	 16
400	 24	259.3	49.2	 16
401	 24	80.0	13.3	 16
402	 24	209.0	32.5	 16
403	 24	2482.5	377.8	 16
404	 24	105.3	15.9	 16
405	 24	635.0	136.1	 16
406	 24	58.0	8.3	 16
407	 24	69.8	12.7	 16
408	 24	398.0	45.3	 16
409	 24	234.3	38.1	 16
410	 24	173.5	21.8	 16
411	 24	78.5	10.8	 16
412	 24	129.5	24.4	 16
413	 24	171.5	26.2	 16
414	 24	61.3	10.6	 16
415	 24	84.0	10.9	 16
416	 24	75.0	12.1	 16
417	 24	144.8	31.8	 16
418	 24	124.5	27.8	 16
419	 24	197.5	18.6	 16
420	 24	69.8	13.9	 16
421	 24	59.5	13.2	 16
422	 24	349.3	30.4	 16
423	 24	81.0	14.0	 16
424	 24	100.5	21.0	 16
425	 24	92.8	17.7	 16
426	 24	708.5	88.3	 16
427	 24	112.8	21.4	 16
428	 24	262.5	32.7	 16
429	 24	939.0	157.1	 16
430	 24	244.3	33.6	 16
431	 24	86.8	13.3	 16
432	 24	83.8	14.6	 16
433	 24	87.8	17.4	 16
434	 24	156.5	21.4	 16
435	 24	475.8	43.3	 16
436	 24	159.8	29.7	 16
437	 24	111.5	41.0	 16
438	 24	139.0	22.2	 16
439	 24	351.5	44.4	 16
440	 24	76.0	12.0	 16
441	 24	147.8	23.9	 16
442	 24	125.5	25.4	 16
443	 24	81.0	8.3	 16
444	 24	90.0	9.3	 16
445	 24	149.3	27.4	 16
446	 24	239.5	35.6	 16
447	 24	721.5	69.8	 16
448	 24	202.3	24.9	 16
449	 24	187.0	33.1	 16
450	 24	268.5	35.5	 16
451	 24	169.3	20.0	 16
452	 24	113.3	16.9	 16
453	 24	123.0	15.9	 16
454	 24	95.5	11.9	 16
455	 24	210.0	19.5	 16
456	 24	81.8	12.5	 16
457	 24	95.3	43.6	 16
458	 24	147.5	20.3	 16
459	 24	129.3	24.6	 16
460	 24	95.3	13.3	 16
461	 24	258.5	33.2	 16
462	 24	400.0	78.3	 16
463	 24	127.3	24.6	 16
464	 24	154.3	17.8	 16
465	 24	68.0	19.0	 16
466	 24	61.5	9.7	 16
467	 24	59.0	15.1	 16
468	 24	180.5	25.7	 16
469	 24	125.3	14.6	 16
470	 24	111.0	19.4	 16
471	 24	67.3	12.6	 16
472	 24	289.0	46.1	 16
473	 24	124.5	13.7	 16
474	 24	345.8	42.1	 16
475	 24	211.3	18.4	 16
476	 24	146.3	16.4	 16
477	 24	85.0	15.1	 16
478	 24	83.3	12.1	 16
479	 24	476.8	40.2	 16
480	 24	175.3	28.6	 16
481	 24	98.5	19.3	 16
482	 24	79.8	15.0	 16
483	 24	70.8	12.4	 16
484	 24	224.8	37.5	 16
485	 24	166.8	23.7	 16
486	 24	100.5	16.4	 16
487	 24	91.8	16.4	 16
488	 24	73.5	26.1	 16
489	 24	137.0	26.0	 16
490	 24	95.3	12.8	 16
491	 24	68.0	9.2	 16
[truncated: 11,112,382 more chars]
