# Supplementary material for: Identify potential drugs for cardiovascular diseases caused by stress-induced genes in vascular smooth muscle cells
Source: PeerJ. 2016 Sep 28;4:e2478. doi: 10.7717/peerj.2478 (PMC5045879; doi:10.7717/peerj.2478)
Supplement: Supplemental Information 8 [file peerj-04-2478-s008.cel]

[CEL]
Version=3

[HEADER]
Cols=712
Rows=712
TotalX=712
TotalY=712
OffsetX=0
OffsetY=0
GridCornerUL=225 235
GridCornerUR=4500 320
GridCornerLR=4425 4590
GridCornerLL=150 4505
Axis-invertX=0
AxisInvertY=0
swapXY=0
DatHeader=[0..46153]  T 24:CLS=4733 RWS=4733 XIN=3  YIN=3  VE=17        2.0 11/22/02 15:26:07       HG-U133A.1sq                  6
Algorithm=Percentile
AlgorithmParameters=Percentile:75;CellMargin:2;OutlierHigh:1.500;OutlierLow:1.004

[INTENSITY]
NumberCells=506944
CellHeader=X	Y	MEAN	STDV	NPIXELS
  0	  0	122.3	17.0	 16
  1	  0	8414.3	625.8	 16
  2	  0	132.0	20.7	 16
  3	  0	8475.3	1016.2	 16
  4	  0	81.5	14.8	 16
  5	  0	132.5	17.6	 16
  6	  0	7129.8	969.5	 16
  7	  0	128.3	20.9	 16
  8	  0	6807.5	630.6	 16
  9	  0	121.0	16.6	 16
 10	  0	6783.3	749.6	 16
 11	  0	142.5	27.4	 16
 12	  0	6810.0	1031.4	 16
 13	  0	120.3	15.9	 16
 14	  0	6884.5	873.9	 16
 15	  0	119.0	21.6	 16
 16	  0	6392.8	656.8	 16
 17	  0	122.5	19.4	 16
 18	  0	6165.3	585.3	 16
 19	  0	121.8	17.1	 16
 20	  0	6011.5	755.8	 16
 21	  0	121.8	18.5	 16
 22	  0	6302.8	1003.8	 16
 23	  0	109.8	18.3	 16
 24	  0	6221.3	838.4	 16
 25	  0	124.5	14.0	 16
 26	  0	6532.5	656.9	 16
 27	  0	137.5	29.3	 16
 28	  0	6629.8	880.4	 16
 29	  0	123.5	20.0	 16
 30	  0	6847.5	1004.5	 16
 31	  0	128.0	16.9	 16
 32	  0	6649.3	685.9	 16
 33	  0	126.5	15.0	 16
 34	  0	6189.0	659.6	 16
 35	  0	131.0	19.6	 16
 36	  0	6277.0	807.1	 16
 37	  0	128.8	19.6	 16
 38	  0	6658.3	924.8	 16
 39	  0	115.0	14.4	 16
 40	  0	6844.5	708.5	 16
 41	  0	132.0	23.0	 16
 42	  0	7022.5	1692.7	 16
 43	  0	134.8	22.7	 16
 44	  0	6505.8	887.0	 16
 45	  0	120.3	17.9	 16
 46	  0	6460.0	1176.1	 16
 47	  0	121.3	19.9	 16
 48	  0	6488.8	701.3	 16
 49	  0	122.0	15.6	 16
 50	  0	6405.3	560.9	 16
 51	  0	133.3	21.7	 16
 52	  0	5930.8	594.5	 16
 53	  0	120.3	15.0	 16
 54	  0	6164.5	1170.5	 16
 55	  0	131.3	19.6	 16
 56	  0	6104.8	845.8	 16
 57	  0	131.3	20.1	 16
 58	  0	5991.8	664.5	 16
 59	  0	120.5	15.1	 16
 60	  0	6225.0	875.4	 16
 61	  0	127.5	15.9	 16
 62	  0	6225.0	1171.8	 16
 63	  0	133.3	16.0	 16
 64	  0	6437.0	809.6	 16
 65	  0	120.0	17.0	 16
 66	  0	5970.3	705.2	 16
 67	  0	140.0	23.5	 16
 68	  0	5786.0	750.6	 16
 69	  0	117.0	24.5	 16
 70	  0	6016.0	970.7	 16
 71	  0	132.5	17.3	 16
 72	  0	5723.8	978.2	 16
 73	  0	134.5	21.3	 16
 74	  0	5993.3	682.7	 16
 75	  0	119.5	22.0	 16
 76	  0	6072.5	623.5	 16
 77	  0	125.3	19.5	 16
 78	  0	6074.8	853.8	 16
 79	  0	131.8	17.9	 16
 80	  0	6099.5	996.4	 16
 81	  0	135.8	24.8	 16
 82	  0	6110.5	736.7	 16
 83	  0	139.0	15.5	 16
 84	  0	6110.0	589.6	 16
 85	  0	140.8	23.9	 16
 86	  0	6054.3	698.6	 16
 87	  0	129.3	23.4	 16
 88	  0	6411.0	1010.9	 16
 89	  0	117.3	17.3	 16
 90	  0	6204.5	753.7	 16
 91	  0	129.3	17.8	 16
 92	  0	6073.3	732.9	 16
 93	  0	141.5	21.1	 16
 94	  0	6437.8	922.4	 16
 95	  0	132.3	15.7	 16
 96	  0	6092.0	983.1	 16
 97	  0	129.5	20.2	 16
 98	  0	5986.3	1213.7	 20
 99	  0	132.3	14.4	 16
100	  0	6052.5	1310.7	 16
101	  0	117.5	14.8	 16
102	  0	6099.0	1299.7	 16
103	  0	118.0	15.9	 16
104	  0	5877.0	1311.0	 16
105	  0	131.5	23.5	 16
106	  0	5729.8	1330.3	 16
107	  0	131.8	28.7	 16
108	  0	5361.8	1145.7	 16
109	  0	139.0	21.9	 16
110	  0	5479.8	1179.8	 16
111	  0	124.3	19.9	 16
112	  0	5545.3	1267.7	 16
113	  0	129.5	17.9	 16
114	  0	5826.3	1374.7	 16
115	  0	119.0	13.0	 16
116	  0	5913.5	1254.5	 16
117	  0	149.5	25.8	 16
118	  0	5693.5	1199.3	 16
119	  0	126.0	18.3	 16
120	  0	5976.8	1348.1	 16
121	  0	136.0	17.2	 16
122	  0	6111.0	1474.7	 16
123	  0	115.3	19.0	 16
124	  0	5901.3	1347.7	 16
125	  0	123.5	18.0	 16
126	  0	5888.0	1155.1	 16
127	  0	122.5	18.9	 16
128	  0	5859.3	1177.7	 16
129	  0	116.8	16.4	 16
130	  0	5848.3	1454.0	 16
131	  0	104.8	21.1	 16
132	  0	6018.0	1204.0	 16
133	  0	114.8	15.8	 16
134	  0	5732.3	926.3	 16
135	  0	124.5	15.9	 16
136	  0	5483.8	775.0	 16
137	  0	121.0	18.3	 16
138	  0	5922.8	1235.7	 16
139	  0	105.0	13.5	 16
140	  0	5674.8	873.8	 16
141	  0	120.3	11.7	 16
142	  0	5707.0	815.4	 16
143	  0	145.0	52.1	 16
144	  0	5340.3	702.2	 16
145	  0	119.3	25.6	 16
146	  0	5286.0	862.1	 16
147	  0	124.5	14.7	 16
148	  0	5385.8	756.2	 16
149	  0	132.8	21.1	 16
150	  0	5338.3	623.1	 16
151	  0	115.3	12.5	 16
152	  0	5482.3	456.8	 16
153	  0	133.0	17.9	 16
154	  0	5679.5	555.9	 16
155	  0	114.5	20.2	 16
156	  0	5483.5	799.9	 16
157	  0	124.0	22.4	 16
158	  0	5440.8	505.4	 16
159	  0	121.3	14.0	 16
160	  0	5400.3	444.5	 16
161	  0	120.3	18.2	 16
162	  0	5015.3	514.5	 16
163	  0	126.0	17.3	 16
164	  0	4959.5	1090.0	 16
165	  0	117.0	19.3	 16
166	  0	5001.3	780.5	 16
167	  0	109.3	13.2	 16
168	  0	4682.5	630.8	 16
169	  0	117.8	19.0	 16
170	  0	5069.8	760.5	 16
171	  0	117.5	17.7	 16
172	  0	5256.8	1160.4	 16
173	  0	115.0	16.3	 16
174	  0	4984.5	843.9	 16
175	  0	123.8	18.9	 16
176	  0	5214.8	776.0	 16
177	  0	120.8	17.2	 16
178	  0	5224.0	893.4	 16
179	  0	110.8	21.1	 16
180	  0	4881.5	1122.5	 16
181	  0	101.8	16.8	 16
182	  0	5039.0	936.5	 16
183	  0	117.0	15.1	 16
184	  0	4538.5	695.2	 16
185	  0	119.0	17.0	 16
186	  0	4400.8	436.1	 16
187	  0	111.8	11.3	 16
188	  0	4867.8	1182.3	 16
189	  0	120.8	18.2	 16
190	  0	4876.8	930.3	 16
191	  0	111.0	18.2	 16
192	  0	4841.3	644.2	 16
193	  0	131.0	21.3	 16
194	  0	4983.5	477.9	 16
195	  0	105.0	13.7	 16
196	  0	4558.0	414.6	 16
197	  0	119.0	20.3	 16
198	  0	4568.5	712.8	 16
199	  0	115.0	16.7	 16
200	  0	4624.5	532.4	 16
201	  0	122.5	21.0	 16
202	  0	4610.8	420.3	 16
203	  0	118.0	15.0	 16
204	  0	4588.3	458.2	 16
205	  0	112.0	17.6	 16
206	  0	4788.8	673.0	 16
207	  0	132.0	17.3	 16
208	  0	4825.5	579.7	 16
209	  0	119.5	19.1	 16
210	  0	4855.0	466.1	 16
211	  0	108.3	21.5	 16
212	  0	4575.8	371.9	 16
213	  0	110.3	21.6	 16
214	  0	4571.3	838.6	 16
215	  0	117.5	16.3	 16
216	  0	4444.8	550.1	 16
217	  0	116.3	17.7	 16
218	  0	4669.5	556.9	 16
219	  0	110.0	13.9	 16
220	  0	4593.8	456.8	 16
221	  0	111.5	15.9	 16
222	  0	4634.0	746.9	 16
223	  0	107.3	20.8	 16
224	  0	4681.8	598.3	 16
225	  0	128.0	26.8	 16
226	  0	4401.0	485.0	 16
227	  0	117.0	20.2	 16
228	  0	4384.5	506.1	 16
229	  0	102.5	23.0	 16
230	  0	4577.5	849.6	 16
231	  0	111.8	17.1	 16
232	  0	4768.8	571.9	 16
233	  0	105.3	16.5	 16
234	  0	4647.0	411.8	 16
235	  0	57.5	6.2	 16
236	  0	2256.3	248.6	 16
237	  0	58.5	15.6	 16
238	  0	101.3	17.9	 16
239	  0	59.3	8.2	 16
240	  0	5350.5	607.7	 16
241	  0	105.3	16.2	 16
242	  0	4704.3	529.5	 16
243	  0	124.8	22.8	 16
244	  0	4230.5	449.7	 16
245	  0	102.0	12.8	 16
246	  0	4214.0	492.2	 16
247	  0	114.8	14.6	 16
248	  0	4545.3	660.1	 16
249	  0	102.8	15.7	 16
250	  0	4494.5	556.5	 16
251	  0	121.5	17.4	 16
252	  0	4359.5	565.6	 16
253	  0	119.0	18.4	 16
254	  0	4336.0	676.1	 16
255	  0	113.0	16.8	 16
256	  0	4238.5	720.1	 16
257	  0	117.5	20.7	 16
258	  0	4285.5	668.7	 16
259	  0	107.8	10.4	 16
260	  0	4028.0	614.0	 16
261	  0	108.3	13.5	 16
262	  0	4121.3	667.0	 16
263	  0	95.3	17.4	 16
264	  0	4286.5	777.2	 16
265	  0	116.3	12.5	 16
266	  0	4275.5	770.4	 16
267	  0	113.5	20.6	 16
268	  0	4234.3	708.5	 16
269	  0	107.8	18.2	 16
270	  0	4025.0	734.7	 16
271	  0	123.3	14.7	 16
272	  0	4090.3	829.5	 16
273	  0	100.8	11.5	 16
274	  0	4207.3	767.0	 16
275	  0	101.5	15.0	 16
276	  0	4098.5	769.8	 20
277	  0	111.3	14.7	 16
278	  0	4200.8	701.5	 16
279	  0	103.0	16.8	 16
280	  0	4351.3	847.8	 16
281	  0	110.0	19.7	 16
282	  0	4460.0	691.1	 16
283	  0	109.5	13.2	 16
284	  0	4806.8	757.2	 16
285	  0	107.5	17.5	 16
286	  0	4814.8	743.7	 16
287	  0	109.0	12.9	 16
288	  0	4586.3	919.8	 16
289	  0	100.5	19.3	 16
290	  0	4519.8	875.5	 16
291	  0	115.3	17.9	 16
292	  0	4270.5	643.9	 16
293	  0	106.5	22.0	 16
294	  0	4175.3	605.2	 16
295	  0	94.0	11.2	 16
296	  0	4256.8	719.9	 16
297	  0	107.5	14.4	 16
298	  0	4442.5	861.6	 16
299	  0	103.8	15.1	 16
300	  0	4503.3	676.5	 16
301	  0	104.5	14.6	 16
302	  0	4391.3	563.4	 16
303	  0	96.3	14.4	 16
304	  0	4499.0	652.0	 16
305	  0	99.0	11.4	 16
306	  0	4541.8	903.5	 16
307	  0	109.5	12.9	 16
308	  0	4766.0	635.9	 16
309	  0	99.3	20.1	 16
310	  0	4445.8	513.8	 16
311	  0	94.5	16.2	 16
312	  0	4294.3	550.3	 16
313	  0	111.5	14.4	 16
314	  0	4676.8	880.5	 16
315	  0	106.5	14.4	 16
316	  0	5033.8	660.2	 16
317	  0	101.3	10.8	 16
318	  0	4802.5	555.8	 16
319	  0	103.3	15.3	 16
320	  0	4554.8	483.3	 16
321	  0	91.0	14.9	 16
322	  0	4811.3	530.3	 12
323	  0	112.3	19.7	 16
324	  0	4665.5	792.0	 16
325	  0	118.8	21.7	 16
326	  0	4714.8	467.1	 16
327	  0	117.0	19.6	 16
328	  0	4995.3	497.4	 16
329	  0	109.5	12.9	 16
330	  0	4827.8	587.5	 16
331	  0	103.3	13.7	 16
332	  0	5019.5	641.6	 16
333	  0	110.0	17.4	 16
334	  0	4671.5	450.0	 16
335	  0	108.0	16.6	 16
336	  0	4672.0	436.0	 16
337	  0	124.3	18.4	 16
338	  0	4750.3	563.6	 16
339	  0	109.3	21.0	 16
340	  0	4661.0	711.2	 16
341	  0	95.3	16.8	 16
342	  0	4941.5	523.6	 16
343	  0	107.8	21.3	 16
344	  0	4743.3	414.3	 16
345	  0	112.3	17.8	 16
346	  0	4948.5	654.0	 16
347	  0	111.0	22.3	 16
348	  0	4944.8	950.7	 16
349	  0	107.3	15.2	 16
350	  0	5003.3	668.5	 16
351	  0	115.8	19.1	 16
352	  0	4905.3	391.0	 16
353	  0	105.8	12.3	 16
354	  0	5009.8	589.0	 16
355	  0	118.3	16.9	 16
356	  0	4742.3	924.1	 16
357	  0	113.0	17.0	 16
358	  0	5089.8	653.6	 16
359	  0	115.0	17.4	 16
360	  0	4967.0	559.8	 16
361	  0	113.0	13.4	 16
362	  0	4943.8	553.5	 16
363	  0	101.3	18.0	 16
364	  0	4974.8	860.7	 16
365	  0	111.3	22.1	 16
366	  0	5035.5	618.4	 16
367	  0	109.5	15.5	 16
368	  0	5267.3	498.6	 16
369	  0	111.3	14.2	 16
370	  0	5097.0	409.8	 16
371	  0	117.5	15.4	 16
372	  0	5210.3	539.9	 16
373	  0	105.3	11.2	 16
374	  0	5339.3	581.8	 16
375	  0	106.0	12.9	 16
376	  0	5387.8	429.2	 16
377	  0	110.5	20.8	 16
378	  0	5654.5	419.6	 16
379	  0	119.5	16.5	 16
380	  0	5579.8	538.4	 16
381	  0	110.0	15.2	 16
382	  0	5351.0	666.9	 16
383	  0	116.8	22.4	 16
384	  0	5162.3	477.3	 16
385	  0	112.3	20.0	 16
386	  0	5299.0	486.2	 16
387	  0	103.8	15.0	 16
388	  0	5391.3	680.1	 16
389	  0	109.3	8.9	 16
390	  0	5550.8	911.9	 16
391	  0	101.8	12.8	 16
392	  0	5721.3	715.0	 16
393	  0	105.0	15.5	 16
394	  0	5811.8	749.0	 16
395	  0	109.0	19.7	 16
396	  0	5808.8	869.2	 16
397	  0	115.8	19.2	 16
398	  0	5884.0	1056.5	 16
399	  0	113.3	16.0	 16
400	  0	5836.0	935.8	 16
401	  0	123.0	20.2	 16
402	  0	5519.0	791.1	 16
403	  0	104.3	17.6	 16
404	  0	5843.5	994.2	 16
405	  0	112.5	13.1	 16
406	  0	5958.0	1245.2	 16
407	  0	107.8	13.0	 16
408	  0	5822.0	1023.2	 16
409	  0	123.3	21.0	 16
410	  0	5740.5	908.9	 16
411	  0	122.5	23.4	 16
412	  0	5688.3	897.1	 16
413	  0	113.5	12.5	 16
414	  0	5537.8	999.0	 16
415	  0	128.0	25.7	 16
416	  0	5792.5	1112.0	 16
417	  0	109.0	15.2	 16
418	  0	6032.3	1102.0	 16
419	  0	109.0	23.0	 16
420	  0	6243.0	1087.1	 16
421	  0	113.5	17.1	 16
422	  0	6090.8	1203.3	 16
423	  0	111.3	15.9	 16
424	  0	6000.3	1169.8	 16
425	  0	108.3	16.8	 16
426	  0	5572.0	1016.2	 16
427	  0	116.0	18.3	 16
428	  0	5417.5	1000.7	 16
429	  0	111.0	18.2	 16
430	  0	5582.5	994.5	 16
431	  0	117.3	22.0	 16
432	  0	5744.8	1070.9	 16
433	  0	116.3	21.5	 16
434	  0	5708.3	1036.0	 16
435	  0	124.3	15.2	 16
436	  0	5836.8	1025.3	 16
437	  0	122.3	20.6	 16
438	  0	5950.3	1037.2	 16
439	  0	106.3	14.3	 16
440	  0	6127.0	1179.0	 16
441	  0	124.3	17.7	 16
442	  0	6222.8	1123.5	 16
443	  0	101.3	23.3	 16
444	  0	5991.8	1044.7	 16
445	  0	115.0	22.3	 16
446	  0	6120.5	1058.5	 16
447	  0	113.0	19.9	 16
448	  0	5800.3	1129.1	 16
449	  0	124.5	25.3	 16
450	  0	5821.3	1072.5	 16
451	  0	111.5	33.5	 16
452	  0	5762.8	1024.2	 16
453	  0	117.0	15.4	 16
454	  0	5764.5	1035.7	 20
455	  0	114.0	19.4	 16
456	  0	6079.5	1022.3	 16
457	  0	113.0	14.7	 16
458	  0	6064.3	772.9	 16
459	  0	121.5	18.3	 16
460	  0	6001.8	702.8	 16
461	  0	117.3	18.3	 16
462	  0	5892.8	681.6	 16
463	  0	107.3	14.0	 16
464	  0	5848.8	912.0	 16
465	  0	110.5	11.4	 16
466	  0	6209.0	876.4	 16
467	  0	109.8	17.0	 16
468	  0	6047.3	673.8	 16
469	  0	100.3	10.6	 16
470	  0	5974.0	723.5	 16
471	  0	107.5	14.3	 16
472	  0	59.8	7.8	 16
473	  0	4045.5	768.5	 16
474	  0	62.3	9.6	 16
475	  0	78.3	8.5	 16
476	  0	64.3	10.8	 16
477	  0	119.3	18.6	 16
478	  0	6053.0	941.4	 16
479	  0	106.0	14.8	 16
480	  0	5896.8	863.5	 16
481	  0	119.3	24.9	 16
482	  0	5910.8	1002.2	 16
483	  0	122.0	15.4	 16
484	  0	5964.3	950.5	 16
485	  0	111.3	13.2	 16
486	  0	5544.0	772.4	 16
487	  0	125.3	22.6	 16
488	  0	5610.5	809.6	 16
489	  0	113.5	20.0	 16
490	  0	5954.8	1258.6	 16
491	  0	120.3	12.5	 16
492	  0	6009.8	981.9	 16
493	  0	135.8	34.6	 16
494	  0	5840.8	833.9	 16
495	  0	107.5	28.5	 16
496	  0	6019.0	899.6	 16
497	  0	125.0	21.2	 16
498	  0	6019.3	1116.1	 16
499	  0	96.5	12.8	 16
500	  0	5924.0	962.7	 16
501	  0	107.8	16.1	 16
502	  0	5672.3	679.8	 16
503	  0	114.0	19.4	 16
504	  0	5637.8	713.4	 16
505	  0	116.3	25.2	 16
506	  0	6036.8	933.0	 16
507	  0	109.0	16.6	 16
508	  0	6177.8	816.6	 16
509	  0	113.3	15.3	 16
510	  0	6114.3	586.3	 16
511	  0	114.3	12.5	 16
512	  0	5981.3	571.6	 16
513	  0	119.3	23.3	 16
514	  0	6024.3	847.5	 16
515	  0	109.0	16.7	 16
516	  0	5966.5	931.5	 16
517	  0	110.3	18.2	 16
518	  0	6062.5	603.3	 16
519	  0	110.0	14.5	 16
520	  0	5970.3	479.8	 16
521	  0	119.3	17.9	 16
522	  0	5920.0	637.3	 16
523	  0	119.5	26.5	 16
524	  0	5673.8	981.0	 16
525	  0	117.5	17.8	 16
526	  0	5919.8	594.8	 16
527	  0	120.5	30.0	 16
528	  0	5874.8	506.0	 16
529	  0	94.3	12.0	 16
530	  0	5948.5	623.9	 16
531	  0	108.3	12.4	 16
532	  0	5931.3	890.1	 16
533	  0	101.0	16.8	 16
534	  0	5950.3	624.5	 16
535	  0	109.3	14.5	 16
536	  0	5874.3	579.5	 16
537	  0	110.3	13.9	 16
538	  0	5717.3	536.2	 16
539	  0	125.0	16.7	 16
540	  0	5711.0	985.0	 16
541	  0	107.0	24.5	 16
542	  0	5947.8	828.7	 16
543	  0	118.3	15.7	 16
544	  0	5950.3	788.7	 16
545	  0	118.5	18.0	 16
546	  0	5952.0	818.0	 16
547	  0	112.8	12.8	 16
548	  0	5998.3	1026.0	 16
549	  0	109.3	20.0	 16
550	  0	5950.8	1119.5	 16
551	  0	113.3	13.9	 16
552	  0	5800.3	947.4	 16
553	  0	117.0	16.8	 16
554	  0	5842.3	1070.2	 16
555	  0	112.3	23.4	 16
556	  0	6118.3	1250.8	 16
557	  0	121.0	17.8	 16
558	  0	6227.5	1328.3	 16
559	  0	122.5	22.3	 16
560	  0	6091.8	1218.0	 16
561	  0	127.5	28.1	 16
562	  0	6026.8	1303.8	 16
563	  0	124.3	27.4	 16
564	  0	5986.0	1415.4	 16
565	  0	130.0	27.6	 16
566	  0	6078.3	1509.2	 16
567	  0	130.5	35.5	 16
568	  0	5926.3	1431.1	 16
569	  0	140.5	38.3	 16
570	  0	6075.8	1448.0	 16
571	  0	147.8	43.4	 16
572	  0	5832.8	1510.6	 16
573	  0	165.8	45.4	 16
574	  0	5984.5	1656.7	 16
575	  0	168.0	45.4	 16
576	  0	5918.3	1582.0	 16
577	  0	128.5	53.6	 16
578	  0	6146.3	1595.4	 16
579	  0	168.8	61.4	 16
580	  0	6202.8	1686.5	 16
581	  0	152.5	60.3	 16
582	  0	6150.8	1774.8	 16
583	  0	175.3	60.1	 16
584	  0	6056.5	1706.1	 16
585	  0	166.5	60.2	 16
586	  0	5983.3	1691.6	 16
587	  0	147.8	54.8	 16
588	  0	5363.0	1523.2	 16
589	  0	137.3	54.1	 16
590	  0	5739.0	1633.2	 16
591	  0	133.5	46.7	 16
592	  0	5771.3	1651.8	 16
593	  0	153.8	57.9	 16
594	  0	5518.8	1493.0	 16
595	  0	136.3	33.8	 16
596	  0	5702.5	1477.9	 16
597	  0	138.5	35.5	 16
598	  0	5527.3	1421.2	 16
599	  0	146.0	29.4	 16
600	  0	5431.5	1404.2	 16
601	  0	139.0	39.2	 16
602	  0	5826.0	1408.3	 16
603	  0	139.3	26.6	 16
604	  0	5897.3	1348.0	 16
605	  0	122.8	28.0	 16
606	  0	5850.5	1174.2	 16
607	  0	117.8	17.8	 16
608	  0	6000.0	1335.6	 16
609	  0	122.8	25.7	 16
610	  0	5891.8	1245.1	 16
611	  0	124.5	26.2	 16
612	  0	5788.8	1198.8	 16
613	  0	123.3	26.5	 16
614	  0	5647.8	1178.0	 16
615	  0	115.5	16.7	 16
616	  0	5625.5	1239.2	 16
617	  0	137.8	29.0	 16
618	  0	5768.3	1245.9	 16
619	  0	124.5	23.2	 16
620	  0	5588.0	1116.9	 16
621	  0	124.3	17.7	 16
622	  0	5554.8	1179.3	 16
623	  0	140.3	25.6	 16
624	  0	5968.8	1525.9	 16
625	  0	113.0	23.2	 16
626	  0	6026.3	1365.0	 16
627	  0	124.0	24.9	 16
628	  0	5867.0	1277.9	 16
629	  0	134.8	28.7	 16
630	  0	5573.0	1235.0	 16
631	  0	145.3	37.5	 16
632	  0	5435.5	1347.4	 20
633	  0	125.0	18.8	 16
634	  0	5473.5	737.8	 16
635	  0	110.0	17.3	 16
636	  0	5687.5	528.3	 16
637	  0	109.0	15.2	 16
638	  0	5601.5	519.0	 16
639	  0	102.8	12.3	 16
640	  0	5920.0	777.8	 16
641	  0	116.0	14.6	 16
642	  0	5619.5	605.9	 16
643	  0	115.0	23.2	 16
644	  0	5556.0	497.6	 16
645	  0	109.5	15.5	 16
646	  0	5545.8	507.4	 16
647	  0	118.5	17.5	 16
648	  0	5648.0	641.6	 16
649	  0	105.0	12.8	 16
650	  0	5559.5	737.8	 16
651	  0	104.5	18.9	 16
652	  0	5299.0	499.4	 16
653	  0	108.8	20.3	 16
654	  0	5236.0	440.2	 16
655	  0	118.0	25.7	 16
656	  0	5265.8	488.7	 16
657	  0	111.0	12.8	 16
658	  0	5474.8	654.1	 16
659	  0	99.5	19.2	 16
660	  0	5388.0	480.4	 16
661	  0	113.3	13.5	 16
662	  0	5266.5	399.3	 16
663	  0	103.0	23.7	 16
664	  0	5130.5	441.3	 16
665	  0	117.0	16.6	 16
666	  0	5354.3	886.2	 16
667	  0	103.0	15.6	 16
668	  0	5318.3	639.9	 16
669	  0	96.0	14.9	 16
670	  0	5213.3	408.9	 16
671	  0	124.0	21.1	 16
672	  0	5162.3	513.8	 16
673	  0	119.5	22.2	 16
674	  0	5449.3	1010.5	 16
675	  0	112.5	16.6	 16
676	  0	5483.0	624.0	 16
677	  0	121.0	19.3	 16
678	  0	5269.0	450.4	 16
679	  0	109.8	11.2	 16
680	  0	5398.8	543.4	 16
681	  0	108.8	18.4	 16
682	  0	5659.3	899.9	 16
683	  0	120.5	18.5	 16
684	  0	5719.0	732.0	 16
685	  0	105.8	18.8	 16
686	  0	5442.0	469.3	 16
687	  0	103.3	17.9	 16
688	  0	5695.3	594.4	 16
689	  0	111.3	15.1	 16
690	  0	5587.3	859.5	 16
691	  0	108.0	16.1	 16
692	  0	5497.8	736.1	 16
693	  0	115.3	20.9	 16
694	  0	5714.0	547.8	 16
695	  0	110.0	19.3	 16
696	  0	5545.3	557.2	 16
697	  0	107.3	9.8	 16
698	  0	5245.3	696.3	 16
699	  0	120.8	18.0	 16
700	  0	5248.8	931.6	 16
701	  0	123.0	19.8	 16
702	  0	5435.3	675.3	 16
703	  0	122.8	17.8	 16
704	  0	5366.8	704.5	 16
705	  0	113.3	16.8	 16
706	  0	5691.8	892.0	 16
707	  0	67.8	13.4	 16
708	  0	115.8	15.2	 16
709	  0	5817.8	787.7	 16
710	  0	104.0	16.0	 16
711	  0	268.8	50.5	 16
  0	  1	8494.8	661.3	 16
  1	  1	150.5	27.0	 16
  2	  1	7842.3	936.6	 16
  3	  1	143.8	14.9	 16
  4	  1	81.3	14.0	 16
  5	  1	231.0	22.4	 16
  6	  1	112.0	16.0	 16
  7	  1	85.0	13.1	 16
  8	  1	193.3	28.2	 16
  9	  1	87.5	12.4	 16
 10	  1	118.8	16.8	 16
 11	  1	128.3	14.5	 16
 12	  1	113.8	17.9	 16
 13	  1	122.3	16.2	 16
 14	  1	193.8	34.6	 16
 15	  1	141.5	25.9	 16
 16	  1	167.3	32.3	 16
 17	  1	105.3	17.8	 16
 18	  1	104.3	23.0	 16
 19	  1	234.5	24.8	 16
 20	  1	181.8	28.7	 16
 21	  1	93.8	22.8	 16
 22	  1	175.8	25.2	 16
 23	  1	117.5	15.6	 16
 24	  1	270.5	23.2	 16
 25	  1	653.0	85.5	 16
 26	  1	164.5	19.4	 16
 27	  1	257.0	37.4	 16
 28	  1	157.5	28.7	 16
 29	  1	242.3	30.3	 16
 30	  1	105.5	22.1	 16
 31	  1	74.5	22.9	 16
 32	  1	120.3	16.1	 16
 33	  1	96.8	13.9	 16
 34	  1	257.8	27.1	 16
 35	  1	111.0	15.5	 16
 36	  1	141.3	28.0	 16
 37	  1	118.3	17.5	 16
 38	  1	200.0	33.5	 16
 39	  1	145.8	19.0	 16
 40	  1	155.5	32.3	 16
 41	  1	145.8	23.0	 16
 42	  1	582.0	66.5	 16
 43	  1	195.5	23.5	 16
 44	  1	138.3	21.1	 16
 45	  1	435.3	66.9	 16
 46	  1	137.3	14.9	 16
 47	  1	244.0	38.3	 16
 48	  1	151.8	24.5	 16
 49	  1	213.3	24.7	 16
 50	  1	175.8	17.8	 16
 51	  1	200.0	26.8	 16
 52	  1	266.5	61.9	 16
 53	  1	95.5	10.8	 16
 54	  1	91.3	18.9	 16
 55	  1	140.0	19.6	 16
 56	  1	150.5	17.8	 16
 57	  1	226.8	31.6	 16
 58	  1	753.3	80.1	 16
 59	  1	94.0	14.1	 16
 60	  1	117.8	15.5	 16
 61	  1	100.8	14.5	 16
 62	  1	131.5	14.7	 16
 63	  1	86.3	15.7	 16
 64	  1	176.5	21.4	 16
 65	  1	117.3	11.5	 16
 66	  1	262.8	35.6	 16
 67	  1	146.5	16.2	 16
 68	  1	239.3	30.5	 16
 69	  1	74.0	13.0	 16
 70	  1	109.0	15.6	 16
 71	  1	209.8	25.9	 16
 72	  1	133.8	16.9	 16
 73	  1	332.5	29.0	 16
 74	  1	294.3	29.0	 16
 75	  1	96.3	19.8	 16
 76	  1	135.0	16.9	 16
 77	  1	105.0	15.1	 16
 78	  1	120.0	23.4	 16
 79	  1	84.8	15.1	 16
 80	  1	101.0	17.9	 16
 81	  1	93.8	14.3	 16
 82	  1	277.8	40.5	 16
 83	  1	149.5	18.5	 16
 84	  1	140.8	22.0	 16
 85	  1	89.3	28.7	 16
 86	  1	89.5	10.9	 16
 87	  1	495.3	73.2	 16
 88	  1	145.0	14.8	 16
 89	  1	294.3	30.5	 16
 90	  1	113.0	14.7	 16
 91	  1	130.3	18.3	 16
 92	  1	93.0	14.1	 16
 93	  1	180.0	22.4	 16
 94	  1	186.0	16.0	 16
 95	  1	247.0	28.4	 16
 96	  1	104.0	11.5	 16
 97	  1	193.8	32.1	 16
 98	  1	90.8	16.3	 16
 99	  1	185.3	22.3	 16
100	  1	331.8	30.3	 16
101	  1	86.5	17.3	 16
102	  1	75.0	20.2	 16
103	  1	159.3	30.9	 16
104	  1	107.0	19.6	 16
105	  1	147.3	29.8	 16
106	  1	159.0	22.3	 16
107	  1	129.0	15.0	 16
108	  1	131.0	20.2	 16
109	  1	70.3	7.2	 16
110	  1	111.0	15.0	 16
111	  1	200.0	33.1	 16
112	  1	135.5	17.9	 16
113	  1	163.3	25.0	 16
114	  1	261.8	34.0	 16
115	  1	117.3	12.6	 16
116	  1	163.0	28.6	 16
117	  1	131.3	13.9	 20
118	  1	115.3	19.2	 16
119	  1	197.5	25.8	 16
120	  1	303.8	58.9	 16
121	  1	154.0	27.4	 16
122	  1	168.8	37.5	 16
123	  1	165.8	31.3	 16
124	  1	106.5	19.6	 16
125	  1	139.0	16.1	 16
126	  1	151.3	22.2	 16
127	  1	151.5	19.3	 16
128	  1	184.5	31.9	 16
129	  1	90.3	10.8	 16
130	  1	140.0	17.1	 16
131	  1	121.0	14.4	 16
132	  1	154.5	20.8	 16
133	  1	201.8	30.0	 16
134	  1	190.3	20.6	 16
135	  1	177.8	17.3	 16
136	  1	126.3	20.9	 16
137	  1	104.0	22.0	 16
138	  1	92.8	15.0	 16
139	  1	106.0	17.2	 16
140	  1	89.0	12.5	 16
141	  1	79.5	16.9	 16
142	  1	253.3	33.7	 16
143	  1	140.3	17.7	 16
144	  1	335.5	39.1	 16
145	  1	410.0	60.3	 16
146	  1	323.8	50.2	 16
147	  1	106.8	20.4	 16
148	  1	705.8	85.2	 16
149	  1	108.0	13.3	 16
150	  1	123.3	15.3	 16
151	  1	99.8	17.7	 16
152	  1	241.3	31.2	 16
153	  1	180.8	27.0	 16
154	  1	95.3	17.1	 16
155	  1	80.3	17.5	 16
156	  1	438.0	63.2	 16
157	  1	307.0	38.0	 16
158	  1	109.0	22.0	 16
159	  1	121.3	16.1	 16
160	  1	137.5	17.9	 16
161	  1	247.0	39.0	 16
162	  1	124.5	16.1	 16
163	  1	257.0	37.8	 16
164	  1	355.3	39.3	 16
165	  1	120.3	16.1	 16
166	  1	187.3	22.6	 16
167	  1	301.0	26.8	 16
168	  1	141.8	32.5	 16
169	  1	91.3	16.9	 16
170	  1	149.0	17.7	 16
171	  1	112.0	14.9	 16
172	  1	252.0	44.6	 16
173	  1	125.5	17.3	 16
174	  1	127.3	17.0	 16
175	  1	650.0	71.5	 16
176	  1	157.0	24.0	 16
177	  1	109.3	13.6	 16
178	  1	151.3	16.0	 16
179	  1	143.5	17.6	 16
180	  1	177.3	23.1	 16
181	  1	202.8	26.8	 16
182	  1	92.8	10.9	 16
183	  1	146.8	22.1	 16
184	  1	100.3	15.2	 16
185	  1	108.5	72.9	 16
186	  1	123.0	20.1	 16
187	  1	185.0	21.7	 16
188	  1	116.8	17.4	 16
189	  1	451.3	41.9	 16
190	  1	111.5	14.2	 16
191	  1	121.5	16.0	 16
192	  1	218.0	23.6	 16
193	  1	162.8	22.2	 16
194	  1	129.5	24.8	 16
195	  1	176.0	25.9	 16
196	  1	156.3	19.3	 16
197	  1	120.8	16.6	 16
198	  1	136.8	22.4	 16
199	  1	203.0	25.0	 16
200	  1	123.5	16.4	 16
201	  1	99.8	11.3	 16
202	  1	323.8	32.8	 16
203	  1	165.8	23.4	 16
204	  1	99.0	15.9	 16
205	  1	133.3	21.8	 16
206	  1	261.0	31.4	 16
207	  1	141.3	15.9	 16
208	  1	86.5	11.8	 16
209	  1	107.3	20.1	 16
210	  1	97.8	33.0	 16
211	  1	303.5	40.0	 16
212	  1	86.0	17.1	 16
213	  1	93.0	13.0	 16
214	  1	108.0	18.8	 16
215	  1	155.3	16.8	 16
216	  1	112.5	22.2	 16
217	  1	608.8	72.3	 16
218	  1	176.0	35.2	 16
219	  1	112.3	15.6	 16
220	  1	92.5	13.1	 16
221	  1	179.8	25.7	 16
222	  1	94.8	12.2	 16
223	  1	411.3	53.9	 16
224	  1	83.5	15.1	 16
225	  1	86.5	13.6	 16
226	  1	169.8	13.9	 16
227	  1	150.5	23.7	 16
228	  1	232.8	35.0	 16
229	  1	153.8	19.4	 16
230	  1	282.8	36.8	 16
231	  1	131.5	18.2	 16
232	  1	87.3	15.6	 16
233	  1	119.5	12.4	 16
234	  1	92.0	14.4	 16
235	  1	66.3	10.5	 16
236	  1	644.8	95.2	 16
237	  1	76.3	37.2	 16
238	  1	87.5	11.2	 16
239	  1	66.5	12.6	 16
240	  1	109.0	16.8	 16
241	  1	117.5	15.9	 16
242	  1	92.3	13.4	 16
243	  1	151.3	15.7	 16
244	  1	178.8	27.3	 16
245	  1	179.3	24.6	 16
246	  1	121.5	10.3	 16
247	  1	177.3	26.5	 16
248	  1	85.5	18.1	 16
249	  1	107.3	12.1	 16
250	  1	113.5	16.3	 16
251	  1	115.5	17.7	 16
252	  1	80.0	13.1	 16
253	  1	160.8	27.7	 16
254	  1	92.5	17.1	 16
255	  1	69.5	17.4	 12
256	  1	220.5	25.1	 16
257	  1	89.8	13.0	 16
258	  1	92.5	23.7	 16
259	  1	171.3	26.0	 16
260	  1	101.8	16.3	 16
261	  1	192.0	28.3	 16
262	  1	85.3	17.5	 16
263	  1	103.8	14.8	 16
264	  1	167.8	19.3	 16
265	  1	169.0	24.6	 16
266	  1	79.3	14.8	 16
267	  1	141.5	23.0	 16
268	  1	121.8	19.3	 16
269	  1	79.0	12.3	 16
270	  1	89.3	13.7	 16
271	  1	79.8	12.8	 16
272	  1	96.3	17.1	 16
273	  1	679.0	127.7	 16
274	  1	74.3	9.6	 16
275	  1	114.3	14.8	 16
276	  1	798.8	132.5	 16
277	  1	119.5	11.5	 16
278	  1	103.0	14.5	 16
279	  1	194.3	29.8	 16
280	  1	90.5	17.5	 16
281	  1	129.0	23.3	 16
282	  1	109.5	15.2	 16
283	  1	194.3	31.7	 16
284	  1	101.8	11.8	 16
285	  1	171.3	19.4	 16
286	  1	173.3	21.4	 16
287	  1	120.0	22.2	 16
288	  1	99.0	15.7	 16
289	  1	171.8	17.1	 16
290	  1	187.3	15.0	 16
291	  1	85.8	13.2	 16
292	  1	288.8	41.4	 16
293	  1	210.0	25.0	 16
294	  1	149.5	25.1	 16
295	  1	106.0	11.0	 20
296	  1	93.8	18.0	 16
297	  1	93.3	13.2	 16
298	  1	158.5	32.9	 16
299	  1	84.5	16.0	 16
300	  1	95.3	19.5	 16
301	  1	77.0	12.0	 16
302	  1	120.5	34.3	 16
303	  1	175.5	27.8	 16
304	  1	73.3	13.0	 16
305	  1	173.3	29.5	 16
306	  1	197.3	34.1	 16
307	  1	105.5	16.5	 16
308	  1	117.0	16.0	 16
309	  1	160.0	22.8	 16
310	  1	124.8	122.3	 16
311	  1	281.0	31.8	 16
312	  1	110.8	21.3	 16
313	  1	122.8	19.6	 16
314	  1	544.0	46.5	 16
315	  1	189.0	25.8	 16
316	  1	98.0	20.2	 16
317	  1	137.3	31.2	 16
318	  1	111.8	17.8	 16
319	  1	155.8	18.8	 16
320	  1	163.8	21.8	 16
321	  1	162.0	22.9	 16
322	  1	108.3	20.1	 16
323	  1	129.5	20.1	 16
324	  1	172.5	27.4	 16
325	  1	75.5	11.9	 16
326	  1	111.0	12.9	 16
327	  1	95.8	10.4	 16
328	  1	133.0	15.6	 16
329	  1	313.8	49.3	 16
330	  1	120.8	20.2	 16
331	  1	136.5	16.2	 16
332	  1	225.0	30.0	 16
333	  1	317.3	35.5	 16
334	  1	100.0	22.7	 16
335	  1	1074.3	132.9	 16
336	  1	144.8	16.1	 16
337	  1	281.0	30.5	 16
338	  1	84.3	15.7	 16
339	  1	72.0	11.2	 16
340	  1	133.5	17.3	 16
341	  1	118.8	17.3	 16
342	  1	170.0	21.4	 16
343	  1	144.0	22.8	 16
344	  1	126.3	19.6	 16
345	  1	316.5	38.7	 16
346	  1	148.0	30.5	 16
347	  1	304.5	34.4	 16
348	  1	355.5	51.5	 16
349	  1	222.5	35.4	 16
350	  1	87.3	15.8	 16
351	  1	64.3	12.0	 16
352	  1	175.5	16.1	 16
353	  1	112.8	17.3	 16
354	  1	7379.3	1332.7	 16
355	  1	546.8	108.2	 16
356	  1	474.8	42.3	 16
357	  1	95.8	10.7	 16
358	  1	124.5	21.2	 16
359	  1	140.3	16.3	 16
360	  1	87.0	17.4	 16
361	  1	64.5	13.6	 16
362	  1	80.8	12.5	 16
363	  1	99.8	13.4	 16
364	  1	81.0	11.9	 16
365	  1	81.0	14.4	 16
366	  1	115.8	18.7	 16
367	  1	122.3	18.4	 16
368	  1	229.3	23.9	 16
369	  1	112.8	15.9	 16
370	  1	99.0	16.8	 16
371	  1	5627.0	952.4	 16
372	  1	151.3	23.2	 16
373	  1	351.8	43.9	 16
374	  1	128.5	20.0	 16
375	  1	140.3	24.4	 16
376	  1	145.3	25.3	 16
377	  1	128.8	13.8	 16
378	  1	238.0	21.2	 16
379	  1	284.5	31.3	 16
380	  1	107.5	15.3	 16
381	  1	241.8	30.0	 16
382	  1	284.5	28.2	 16
383	  1	304.0	28.7	 16
384	  1	196.5	17.7	 16
385	  1	84.3	14.1	 16
386	  1	104.0	14.2	 16
387	  1	99.3	16.6	 16
388	  1	62.5	10.7	 16
389	  1	74.0	11.2	 16
390	  1	110.0	18.0	 16
391	  1	115.5	11.0	 16
392	  1	91.0	13.1	 16
393	  1	84.0	9.6	 16
394	  1	98.8	13.0	 16
395	  1	192.5	23.0	 16
396	  1	293.5	41.0	 16
397	  1	142.0	27.7	 16
398	  1	160.3	26.7	 16
399	  1	156.5	11.6	 16
400	  1	140.3	20.3	 16
401	  1	104.8	20.3	 16
402	  1	185.3	33.9	 16
403	  1	197.0	28.4	 16
404	  1	573.3	59.8	 16
405	  1	527.8	73.8	 16
406	  1	175.0	26.4	 16
407	  1	146.5	19.1	 16
408	  1	189.8	29.3	 16
409	  1	151.8	19.3	 16
410	  1	114.0	15.7	 16
411	  1	185.8	27.0	 16
412	  1	353.8	36.5	 16
413	  1	169.3	25.7	 16
414	  1	145.5	16.0	 16
415	  1	111.0	16.6	 16
416	  1	110.0	18.0	 16
417	  1	306.0	51.1	 16
418	  1	135.8	17.1	 16
419	  1	135.5	28.3	 16
420	  1	265.5	38.8	 16
421	  1	133.8	21.8	 16
422	  1	214.8	33.3	 16
423	  1	286.5	34.4	 16
424	  1	121.3	13.4	 16
425	  1	124.8	17.8	 16
426	  1	170.3	25.0	 16
427	  1	110.5	18.4	 16
428	  1	83.3	12.6	 16
429	  1	284.8	69.3	 16
430	  1	77.8	16.0	 16
431	  1	177.0	18.2	 16
432	  1	147.8	25.0	 16
433	  1	146.8	19.3	 16
434	  1	170.8	23.6	 16
435	  1	117.5	20.2	 16
436	  1	91.5	14.0	 16
437	  1	79.5	13.2	 16
438	  1	89.8	15.1	 16
439	  1	248.0	40.8	 16
440	  1	72.8	12.0	 16
441	  1	136.5	19.4	 16
442	  1	169.5	34.1	 16
443	  1	92.0	16.0	 16
444	  1	95.3	15.1	 16
445	  1	109.8	18.1	 16
446	  1	96.3	15.1	 16
447	  1	76.3	15.0	 16
448	  1	130.8	39.0	 16
449	  1	87.3	14.4	 16
450	  1	102.5	19.4	 16
451	  1	134.3	21.5	 16
452	  1	278.3	35.6	 16
453	  1	271.0	33.7	 16
454	  1	172.3	22.3	 16
455	  1	99.8	18.2	 16
456	  1	422.5	60.4	 16
457	  1	825.0	83.5	 16
458	  1	150.3	24.2	 16
459	  1	93.3	13.6	 16
460	  1	246.8	39.4	 16
461	  1	170.3	31.8	 16
462	  1	83.5	11.8	 16
463	  1	86.5	14.8	 16
464	  1	142.0	14.0	 16
465	  1	439.5	55.8	 16
466	  1	191.5	19.7	 16
467	  1	207.5	28.2	 16
468	  1	185.3	19.7	 16
469	  1	105.3	14.7	 16
470	  1	230.0	32.5	 16
471	  1	80.0	14.0	 16
472	  1	67.3	11.2	 16
473	  1	1701.5	325.9	 20
474	  1	60.3	7.3	 16
475	  1	77.3	13.6	 16
476	  1	57.8	10.2	 16
477	  1	210.0	26.3	 16
478	  1	127.5	20.1	 16
479	  1	82.0	12.8	 16
480	  1	80.5	11.6	 16
481	  1	82.8	13.0	 16
482	  1	571.5	69.9	 16
483	  1	141.5	20.6	 16
484	  1	100.8	17.4	 16
485	  1	236.5	24.7	 16
486	  1	92.3	12.3	 16
487	  1	99.8	25.6	 16
488	  1	78.8	17.3	 16
489	  1	94.5	17.4	 16
490	  1	229.8	21.4	 16
491	  1	123.0	18.3	 16
492	  1	78.0	10.5	 16
493	  1	148.0	20.5	 16
494	  1	142.3	17.8	 16
495	  1	119.3	17.5	 16
496	  1	221.8	31.5	 16
497	  1	175.3	26.3	 16
498	  1	79.0	11.6	 16
499	  1	94.0	12.2	 16
500	  1	86.3	15.9	 16
501	  1	132.0	14.1	 16
502	  1	309.8	47.9	 16
503	  1	105.8	14.2	 16
504	  1	88.5	16.1	 16
505	  1	79.3	15.1	 16
506	  1	274.8	32.0	 16
507	  1	137.8	16.0	 16
508	  1	113.3	17.5	 16
509	  1	148.8	23.5	 16
510	  1	262.0	24.8	 16
511	  1	206.0	20.5	 16
512	  1	85.3	14.1	 16
513	  1	496.8	94.1	 16
514	  1	106.3	11.1	 16
515	  1	133.0	25.6	 16
516	  1	108.3	13.8	 16
517	  1	131.8	23.0	 16
518	  1	519.3	57.4	 16
519	  1	399.5	40.5	 16
520	  1	99.0	18.0	 16
521	  1	75.8	11.0	 16
522	  1	383.8	64.2	 16
523	  1	129.3	17.6	 16
524	  1	284.5	26.7	 16
525	  1	408.3	48.7	 16
526	  1	206.3	30.8	 16
527	  1	136.5	18.5	 16
528	  1	112.0	17.1	 16
529	  1	186.0	20.0	 16
530	  1	463.8	56.8	 16
531	  1	75.3	16.2	 16
532	  1	66.0	10.9	 16
533	  1	127.3	19.4	 16
534	  1	211.3	33.3	 16
535	  1	143.5	13.0	 16
536	  1	79.3	14.1	 16
537	  1	85.0	17.7	 16
538	  1	107.3	15.9	 16
539	  1	119.3	22.5	 16
540	  1	148.8	19.1	 16
541	  1	102.5	14.4	 16
542	  1	543.0	55.3	 16
543	  1	153.8	16.1	 16
544	  1	180.0	28.1	 16
545	  1	88.5	11.5	 16
546	  1	340.3	53.3	 16
547	  1	276.5	34.7	 16
548	  1	80.3	16.9	 16
549	  1	79.3	15.3	 16
550	  1	153.5	27.2	 16
551	  1	110.3	17.2	 16
552	  1	99.0	12.7	 16
553	  1	123.8	21.8	 16
554	  1	81.8	15.4	 16
555	  1	84.5	15.9	 16
556	  1	88.3	12.3	 16
557	  1	196.5	25.9	 16
558	  1	158.8	17.5	 16
559	  1	692.3	103.8	 16
560	  1	2575.8	222.9	 16
561	  1	191.5	56.5	 16
562	  1	330.3	52.0	 16
563	  1	126.5	16.2	 16
564	  1	164.0	23.6	 16
565	  1	155.5	27.6	 16
566	  1	187.8	22.6	 16
567	  1	89.8	15.8	 16
568	  1	695.5	139.2	 16
569	  1	146.0	22.7	 16
570	  1	91.5	17.3	 16
571	  1	74.5	11.9	 16
572	  1	73.3	14.2	 16
573	  1	137.8	24.4	 16
574	  1	82.5	11.0	 16
575	  1	79.0	12.2	 16
576	  1	97.0	11.2	 16
577	  1	94.3	13.4	 16
578	  1	105.5	21.7	 16
579	  1	169.8	31.6	 16
580	  1	177.8	26.3	 16
581	  1	90.0	15.7	 16
582	  1	169.0	30.0	 16
583	  1	220.5	29.0	 16
584	  1	154.3	23.1	 16
585	  1	269.5	55.1	 16
586	  1	135.5	25.0	 16
587	  1	104.5	10.7	 16
588	  1	132.0	37.6	 16
589	  1	156.5	24.7	 16
590	  1	158.0	43.2	 16
591	  1	79.3	12.3	 16
592	  1	348.8	84.8	 16
593	  1	93.0	19.1	 16
594	  1	97.3	16.7	 16
595	  1	90.3	17.0	 16
596	  1	198.5	33.5	 16
597	  1	176.3	28.1	 16
598	  1	170.8	23.7	 16
599	  1	197.5	16.6	 16
600	  1	185.8	30.9	 16
601	  1	189.0	24.7	 16
602	  1	189.8	23.2	 16
603	  1	133.0	21.5	 16
604	  1	309.5	47.4	 16
605	  1	85.3	15.0	 16
606	  1	88.3	10.6	 16
607	  1	109.5	16.6	 16
608	  1	275.0	38.7	 16
609	  1	1840.0	416.7	 16
610	  1	200.8	28.8	 16
611	  1	318.3	54.2	 16
612	  1	100.5	15.4	 16
613	  1	108.3	21.0	 16
614	  1	104.8	28.2	 16
615	  1	102.3	14.8	 16
616	  1	148.3	34.2	 16
617	  1	246.8	24.2	 16
618	  1	124.8	15.3	 16
619	  1	95.0	17.7	 16
620	  1	165.3	22.7	 16
621	  1	120.3	31.4	 16
622	  1	155.5	37.9	 16
623	  1	132.8	21.6	 16
624	  1	124.3	18.7	 16
625	  1	104.3	10.9	 16
626	  1	314.8	31.5	 16
627	  1	202.5	34.7	 16
628	  1	311.5	30.7	 16
629	  1	150.5	20.7	 16
630	  1	165.5	20.9	 16
631	  1	422.8	89.3	 16
632	  1	533.8	97.9	 16
633	  1	605.0	44.0	 16
634	  1	151.0	50.6	 16
635	  1	88.0	17.4	 16
636	  1	115.8	21.8	 16
637	  1	159.5	25.8	 16
638	  1	108.3	13.5	 16
639	  1	131.0	21.6	 16
640	  1	124.3	21.3	 16
641	  1	117.5	18.1	 16
642	  1	102.0	14.6	 16
643	  1	355.0	79.0	 16
644	  1	497.8	123.2	 16
645	  1	82.3	18.1	 16
646	  1	99.3	15.2	 16
647	  1	100.8	14.5	 16
648	  1	95.8	18.3	 16
649	  1	88.0	12.8	 16
650	  1	119.8	17.0	 16
651	  1	88.3	15.8	 20
652	  1	146.5	19.8	 16
653	  1	102.8	15.3	 16
654	  1	95.0	10.6	 16
655	  1	298.8	30.8	 16
656	  1	70.5	12.2	 16
657	  1	202.5	30.1	 16
658	  1	92.3	10.9	 16
659	  1	279.3	23.2	 16
660	  1	88.5	13.7	 16
661	  1	96.3	13.5	 16
662	  1	102.5	26.4	 16
663	  1	167.8	20.1	 16
664	  1	121.3	23.9	 16
665	  1	70.3	12.2	 16
666	  1	71.0	9.6	 16
667	  1	854.3	70.9	 16
668	  1	195.0	16.3	 16
669	  1	211.8	24.5	 16
670	  1	98.0	16.1	 16
671	  1	91.3	12.8	 16
672	  1	196.0	20.9	 16
673	  1	128.3	14.9	 16
674	  1	142.0	30.6	 16
675	  1	252.5	33.6	 16
676	  1	173.5	17.5	 16
677	  1	111.0	11.5	 16
678	  1	111.3	18.3	 16
679	  1	101.5	13.6	 16
680	  1	1367.3	213.8	 16
681	  1	81.3	10.7	 16
682	  1	142.5	22.3	 16
683	  1	136.0	16.9	 16
684	  1	352.8	34.1	 16
685	  1	125.0	17.9	 16
686	  1	191.3	29.2	 16
687	  1	369.0	40.4	 16
688	  1	129.0	19.3	 16
689	  1	92.3	15.6	 16
690	  1	92.0	14.7	 16
691	  1	892.8	74.1	 16
692	  1	773.3	52.9	 16
693	  1	80.8	12.6	 16
694	  1	88.5	19.7	 16
695	  1	90.3	12.4	 16
696	  1	83.8	13.3	 16
697	  1	86.0	14.5	 16
698	  1	78.0	17.0	 16
699	  1	93.5	21.0	 16
700	  1	69.3	11.9	 16
701	  1	73.5	14.1	 16
702	  1	158.3	26.0	 16
703	  1	166.8	25.4	 16
704	  1	159.3	24.5	 16
705	  1	135.5	13.6	 16
706	  1	88.5	12.9	 16
707	  1	63.5	10.6	 16
708	  1	5680.0	764.6	 16
709	  1	125.5	18.8	 16
710	  1	5324.3	568.4	 16
711	  1	163.0	22.1	 16
  0	  2	139.8	18.2	 16
  1	  2	7786.8	500.4	 16
  2	  2	136.5	19.1	 16
  3	  2	7863.3	791.1	 16
  4	  2	76.3	11.9	 16
  5	  2	244.5	36.6	 16
  6	  2	112.0	13.8	 16
  7	  2	74.3	14.7	 16
  8	  2	160.8	19.7	 16
  9	  2	90.3	15.6	 16
 10	  2	117.0	19.6	 16
 11	  2	119.3	15.9	 16
 12	  2	96.0	24.2	 16
 13	  2	130.5	23.9	 16
 14	  2	173.8	22.1	 16
 15	  2	238.0	33.9	 16
 16	  2	214.0	22.0	 16
 17	  2	111.3	21.3	 16
 18	  2	87.0	9.6	 16
 19	  2	291.0	24.5	 16
 20	  2	85.5	18.9	 16
 21	  2	74.5	12.0	 16
 22	  2	101.3	14.4	 16
 23	  2	104.3	12.4	 16
 24	  2	335.3	37.7	 16
 25	  2	637.8	56.1	 16
 26	  2	93.3	13.3	 16
 27	  2	204.3	29.2	 16
 28	  2	261.0	29.2	 16
 29	  2	211.3	37.1	 16
 30	  2	151.3	31.1	 16
 31	  2	83.3	14.5	 16
 32	  2	180.5	30.5	 16
 33	  2	101.0	23.5	 16
 34	  2	367.0	40.7	 16
 35	  2	115.0	15.7	 16
 36	  2	305.8	45.1	 16
 37	  2	92.3	13.6	 16
 38	  2	101.5	15.9	 16
 39	  2	174.0	16.2	 16
 40	  2	194.5	23.7	 16
 41	  2	118.3	18.1	 16
 42	  2	299.3	30.5	 16
 43	  2	155.0	22.1	 16
 44	  2	124.3	12.7	 16
 45	  2	292.3	32.0	 16
 46	  2	127.3	19.5	 16
 47	  2	217.8	31.0	 16
 48	  2	113.8	23.5	 16
 49	  2	208.5	27.9	 16
 50	  2	174.0	25.8	 16
 51	  2	198.8	27.4	 16
 52	  2	126.5	15.5	 16
 53	  2	96.8	13.3	 16
 54	  2	103.3	21.5	 16
 55	  2	109.0	19.8	 16
 56	  2	212.3	33.7	 16
 57	  2	250.3	25.2	 16
 58	  2	212.8	31.0	 16
 59	  2	93.5	17.5	 16
 60	  2	110.3	18.1	 16
 61	  2	104.0	19.6	 16
 62	  2	97.0	17.8	 16
 63	  2	90.8	22.4	 16
 64	  2	148.8	38.1	 16
 65	  2	151.3	16.0	 16
 66	  2	145.8	18.1	 16
 67	  2	122.3	21.6	 16
 68	  2	181.0	14.1	 16
 69	  2	88.8	19.2	 16
 70	  2	107.0	20.7	 16
 71	  2	125.3	18.7	 16
 72	  2	105.3	12.5	 16
 73	  2	166.5	27.4	 16
 74	  2	132.3	20.4	 16
 75	  2	85.3	17.7	 16
 76	  2	99.8	11.7	 16
 77	  2	107.3	8.6	 16
 78	  2	82.5	13.9	 16
 79	  2	76.3	13.7	 16
 80	  2	84.8	19.7	 16
 81	  2	150.5	25.4	 16
 82	  2	310.5	36.6	 16
 83	  2	167.8	26.1	 16
 84	  2	143.0	17.5	 16
 85	  2	85.8	12.6	 16
 86	  2	82.5	14.4	 16
 87	  2	216.5	25.2	 16
 88	  2	105.8	15.6	 16
 89	  2	352.5	47.1	 16
 90	  2	106.5	16.4	 16
 91	  2	108.0	22.1	 16
 92	  2	87.0	15.3	 16
 93	  2	124.5	17.6	 16
 94	  2	148.8	24.2	 16
 95	  2	233.3	27.4	 16
 96	  2	99.3	11.8	 16
 97	  2	94.5	15.9	 16
 98	  2	106.0	15.4	 16
 99	  2	255.3	28.9	 16
100	  2	242.0	30.8	 16
101	  2	98.3	14.8	 16
102	  2	74.8	11.8	 16
103	  2	94.5	13.8	 16
104	  2	119.3	25.9	 16
105	  2	455.0	32.1	 16
106	  2	102.0	14.0	 16
107	  2	98.3	13.0	 16
108	  2	105.5	15.9	 16
109	  2	67.3	14.8	 16
110	  2	118.0	20.4	 16
111	  2	183.3	36.7	 16
112	  2	160.3	15.7	 16
113	  2	106.0	13.7	 16
114	  2	132.3	12.4	 16
115	  2	102.5	12.1	 16
116	  2	137.3	24.3	 16
117	  2	106.5	11.7	 16
118	  2	108.0	15.3	 16
119	  2	245.3	41.3	 16
120	  2	119.8	16.2	 16
121	  2	117.3	19.6	 16
122	  2	80.0	13.0	 16
123	  2	105.3	10.1	 16
124	  2	112.8	26.8	 16
125	  2	172.0	22.2	 16
126	  2	137.0	18.3	 16
127	  2	232.8	21.6	 16
128	  2	311.8	29.5	 16
129	  2	84.0	9.5	 16
130	  2	239.5	33.7	 16
131	  2	122.5	17.4	 16
132	  2	214.0	17.4	 16
133	  2	264.8	25.4	 16
134	  2	182.0	21.8	 16
135	  2	106.3	20.0	 20
136	  2	107.0	12.2	 16
137	  2	81.5	9.7	 16
138	  2	79.5	11.0	 16
139	  2	97.3	14.3	 16
140	  2	77.0	17.2	 16
141	  2	89.0	17.0	 16
142	  2	275.0	17.9	 16
143	  2	123.8	18.3	 16
144	  2	284.5	29.7	 16
145	  2	83.3	14.4	 16
146	  2	123.3	14.5	 16
147	  2	121.0	35.5	 16
148	  2	351.0	38.4	 16
149	  2	144.5	20.2	 16
150	  2	98.5	16.9	 16
151	  2	113.8	16.8	 16
152	  2	123.5	16.7	 16
153	  2	118.8	20.0	 16
154	  2	78.5	11.7	 16
155	  2	95.5	18.6	 16
156	  2	177.3	33.8	 16
157	  2	221.5	31.6	 16
158	  2	94.5	22.6	 16
159	  2	139.0	28.0	 16
160	  2	305.8	36.3	 16
161	  2	272.8	27.3	 16
162	  2	95.3	18.1	 16
163	  2	130.3	14.3	 16
164	  2	151.0	17.6	 16
165	  2	132.0	19.9	 16
166	  2	157.0	25.4	 16
167	  2	281.5	20.7	 16
168	  2	94.3	14.9	 16
169	  2	100.0	19.4	 16
170	  2	162.8	20.0	 16
171	  2	95.5	15.0	 16
172	  2	120.0	16.3	 16
173	  2	127.3	21.0	 16
174	  2	106.3	16.1	 16
175	  2	178.0	26.5	 16
176	  2	174.3	18.7	 16
177	  2	69.8	15.5	 16
178	  2	196.8	26.2	 16
179	  2	152.3	19.3	 16
180	  2	91.5	17.7	 16
181	  2	86.3	13.8	 16
182	  2	103.5	20.0	 16
183	  2	98.8	20.1	 16
184	  2	91.3	10.1	 16
185	  2	85.3	13.6	 16
186	  2	99.0	12.3	 16
187	  2	147.8	22.5	 16
188	  2	104.5	13.6	 12
189	  2	127.3	24.0	 16
190	  2	180.5	20.4	 16
191	  2	109.3	18.8	 16
192	  2	219.3	14.9	 16
193	  2	274.8	48.0	 16
194	  2	108.8	16.3	 16
195	  2	191.8	23.3	 16
196	  2	135.5	16.8	 16
197	  2	105.5	24.9	 16
198	  2	98.8	13.1	 16
199	  2	184.5	23.9	 16
200	  2	129.8	18.2	 16
201	  2	84.5	14.9	 16
202	  2	167.5	23.7	 16
203	  2	149.0	24.1	 16
204	  2	82.0	12.8	 16
205	  2	110.3	22.0	 16
206	  2	169.0	22.5	 16
207	  2	149.0	26.6	 16
208	  2	80.0	12.5	 16
209	  2	85.3	11.7	 16
210	  2	92.0	14.1	 16
211	  2	88.5	13.7	 16
212	  2	69.3	12.1	 16
213	  2	92.5	13.4	 16
214	  2	117.3	14.4	 16
215	  2	134.0	25.5	 16
216	  2	113.0	21.2	 16
217	  2	232.3	31.5	 16
218	  2	238.8	32.1	 16
219	  2	103.8	18.3	 16
220	  2	91.3	12.5	 16
221	  2	144.5	15.8	 16
222	  2	81.8	15.2	 16
223	  2	98.0	11.6	 16
224	  2	88.0	149.8	 16
225	  2	69.8	8.9	 16
226	  2	122.3	14.1	 16
227	  2	140.3	25.5	 16
228	  2	95.5	16.3	 16
229	  2	76.0	12.2	 16
230	  2	237.5	38.1	 16
231	  2	85.8	12.1	 16
232	  2	96.8	24.4	 16
233	  2	93.3	14.6	 16
234	  2	89.3	14.6	 16
235	  2	55.3	6.6	 16
236	  2	342.0	39.4	 16
237	  2	57.8	11.1	 16
238	  2	80.0	13.1	 16
239	  2	59.5	11.0	 16
240	  2	88.0	12.6	 16
241	  2	118.3	24.5	 16
242	  2	84.0	13.4	 16
243	  2	138.0	22.1	 16
244	  2	175.0	24.3	 16
245	  2	177.0	22.2	 16
246	  2	196.0	25.2	 16
247	  2	216.8	28.5	 16
248	  2	80.5	10.1	 16
249	  2	94.3	14.8	 16
250	  2	108.5	13.8	 16
251	  2	112.0	16.2	 16
252	  2	79.5	15.6	 16
253	  2	90.5	13.6	 16
254	  2	75.8	9.5	 16
255	  2	79.5	19.5	 16
256	  2	110.0	20.7	 16
257	  2	76.5	14.1	 16
258	  2	107.3	16.6	 16
259	  2	89.5	20.3	 16
260	  2	76.5	13.5	 16
261	  2	114.3	15.3	 16
262	  2	90.3	18.6	 16
263	  2	106.0	16.0	 16
264	  2	169.8	25.1	 16
265	  2	94.5	19.5	 16
266	  2	75.8	11.7	 16
267	  2	319.5	48.4	 16
268	  2	221.3	28.8	 16
269	  2	84.0	19.6	 16
270	  2	79.8	11.2	 16
271	  2	79.3	14.2	 16
272	  2	96.8	15.7	 16
273	  2	172.5	32.5	 16
274	  2	78.5	13.9	 16
275	  2	149.0	17.0	 16
276	  2	241.0	31.6	 16
277	  2	106.0	14.8	 16
278	  2	118.5	14.9	 16
279	  2	358.3	38.8	 16
280	  2	87.5	21.7	 16
281	  2	98.5	17.8	 16
282	  2	92.8	10.2	 16
283	  2	171.0	24.6	 16
284	  2	97.5	14.7	 16
285	  2	150.8	24.9	 16
286	  2	179.5	29.2	 16
287	  2	109.5	13.6	 16
288	  2	87.0	16.2	 16
289	  2	157.0	21.4	 16
290	  2	156.5	21.7	 16
291	  2	78.5	13.4	 16
292	  2	453.0	65.8	 16
293	  2	255.0	32.0	 16
294	  2	129.3	15.9	 16
295	  2	105.5	15.9	 16
296	  2	89.0	16.5	 16
297	  2	84.5	16.0	 16
298	  2	149.3	18.6	 16
299	  2	86.3	13.3	 16
300	  2	72.3	20.0	 16
301	  2	78.5	13.0	 16
302	  2	96.3	16.2	 16
303	  2	165.0	20.1	 16
304	  2	77.8	10.0	 16
305	  2	88.3	13.1	 16
306	  2	93.8	16.1	 16
307	  2	94.8	17.0	 16
308	  2	101.0	17.8	 16
309	  2	124.3	13.0	 16
310	  2	77.0	14.3	 16
311	  2	149.5	12.5	 16
312	  2	78.3	10.9	 16
313	  2	125.8	17.0	 20
314	  2	124.0	19.9	 16
315	  2	114.3	16.2	 16
316	  2	97.8	18.6	 16
317	  2	150.0	13.5	 16
318	  2	111.3	16.1	 16
319	  2	130.5	14.9	 16
320	  2	174.3	23.2	 16
321	  2	147.3	20.1	 16
322	  2	88.3	16.4	 16
323	  2	105.8	20.3	 16
324	  2	106.3	12.8	 16
325	  2	82.3	14.1	 16
326	  2	91.5	11.6	 16
327	  2	96.5	17.4	 16
328	  2	149.3	93.9	 16
329	  2	635.5	42.3	 16
330	  2	143.0	21.3	 16
331	  2	126.8	17.6	 16
332	  2	80.3	7.8	 16
333	  2	152.5	17.5	 16
334	  2	169.8	26.4	 16
335	  2	125.5	16.8	 16
336	  2	134.0	17.1	 16
337	  2	137.5	24.4	 16
338	  2	73.3	11.2	 16
339	  2	79.5	12.3	 16
340	  2	77.8	9.9	 16
341	  2	107.3	22.7	 16
342	  2	146.5	15.5	 16
343	  2	137.5	18.8	 16
344	  2	121.3	14.5	 16
345	  2	351.5	46.0	 16
346	  2	141.3	17.5	 16
347	  2	264.3	27.5	 16
348	  2	460.8	46.4	 16
349	  2	483.0	71.6	 16
350	  2	91.3	15.3	 16
351	  2	74.8	10.7	 16
352	  2	173.8	22.8	 16
353	  2	85.3	12.4	 16
354	  2	2420.0	277.9	 16
355	  2	189.3	27.8	 16
356	  2	217.3	28.8	 16
357	  2	187.0	27.2	 16
358	  2	85.5	12.2	 16
359	  2	105.5	21.6	 16
360	  2	84.8	13.9	 16
361	  2	63.0	10.1	 16
362	  2	74.5	14.9	 16
363	  2	94.0	12.4	 16
364	  2	73.8	10.0	 16
365	  2	72.5	12.3	 16
366	  2	78.3	13.9	 16
367	  2	77.5	10.9	 16
368	  2	76.8	13.0	 16
369	  2	82.3	9.2	 16
370	  2	75.3	10.9	 16
371	  2	1557.3	170.8	 16
372	  2	130.0	19.7	 16
373	  2	112.0	13.5	 16
374	  2	107.5	15.9	 16
375	  2	80.8	13.4	 16
376	  2	138.8	17.1	 16
377	  2	82.5	14.3	 16
378	  2	132.8	18.3	 16
379	  2	132.5	17.7	 16
380	  2	105.3	17.9	 16
381	  2	111.0	16.7	 16
382	  2	233.8	22.1	 16
383	  2	250.0	25.3	 16
384	  2	113.3	11.6	 16
385	  2	108.0	21.0	 16
386	  2	77.3	13.0	 16
387	  2	83.0	9.5	 16
388	  2	68.3	9.9	 16
389	  2	63.8	17.2	 16
390	  2	78.3	13.2	 16
391	  2	130.0	19.3	 16
392	  2	91.8	16.4	 16
393	  2	71.0	11.4	 16
394	  2	86.8	15.3	 16
395	  2	156.0	28.8	 16
396	  2	281.3	32.4	 16
397	  2	92.3	18.7	 16
398	  2	138.8	30.7	 16
399	  2	126.3	20.1	 16
400	  2	130.0	23.0	 16
401	  2	90.3	13.9	 16
402	  2	155.5	16.9	 16
403	  2	162.5	28.3	 16
404	  2	501.3	38.8	 16
405	  2	791.3	62.7	 16
406	  2	157.5	16.5	 16
407	  2	144.8	16.5	 16
408	  2	149.5	30.1	 16
409	  2	93.8	14.4	 16
410	  2	124.5	21.1	 16
411	  2	112.5	16.5	 16
412	  2	347.8	29.5	 16
413	  2	202.8	21.6	 16
414	  2	310.0	28.4	 16
415	  2	101.0	19.7	 16
416	  2	100.8	18.0	 16
417	  2	129.0	19.4	 16
418	  2	154.0	21.3	 16
419	  2	103.0	17.8	 16
420	  2	194.5	31.9	 16
421	  2	130.8	15.5	 16
422	  2	224.3	21.2	 16
423	  2	329.0	41.0	 16
424	  2	88.3	15.8	 16
425	  2	115.0	15.9	 16
426	  2	92.5	11.6	 16
427	  2	64.8	12.8	 16
428	  2	82.0	15.9	 16
429	  2	87.3	11.6	 16
430	  2	66.3	8.5	 16
431	  2	130.0	19.9	 16
432	  2	132.0	13.1	 16
433	  2	158.3	18.0	 16
434	  2	164.8	20.0	 16
435	  2	88.0	13.5	 16
436	  2	75.0	10.8	 16
437	  2	68.5	13.1	 16
438	  2	75.0	11.3	 16
439	  2	105.0	16.1	 16
440	  2	77.0	16.3	 16
441	  2	136.0	17.4	 16
442	  2	111.3	14.5	 16
443	  2	88.0	13.6	 16
444	  2	96.5	15.4	 16
445	  2	97.3	18.4	 16
446	  2	90.5	14.0	 16
447	  2	66.0	8.9	 16
448	  2	77.3	15.4	 16
449	  2	83.5	16.6	 16
450	  2	81.3	8.9	 16
451	  2	154.5	17.0	 16
452	  2	231.3	25.7	 16
453	  2	231.8	24.1	 16
454	  2	220.3	27.2	 16
455	  2	105.0	10.9	 16
456	  2	451.3	44.9	 16
457	  2	773.8	84.8	 16
458	  2	231.3	53.2	 16
459	  2	79.3	13.7	 16
460	  2	274.3	31.2	 16
461	  2	185.0	18.5	 16
462	  2	82.5	15.6	 16
463	  2	88.8	13.1	 16
464	  2	189.3	24.2	 16
465	  2	455.0	90.3	 16
466	  2	137.5	20.6	 16
467	  2	306.3	30.4	 16
468	  2	197.0	36.6	 16
469	  2	84.0	7.0	 16
470	  2	220.8	32.6	 16
471	  2	90.3	16.4	 16
472	  2	55.5	10.3	 16
473	  2	919.0	227.8	 16
474	  2	53.3	9.6	 16
475	  2	66.8	12.2	 16
476	  2	62.3	12.6	 16
477	  2	147.3	28.1	 16
478	  2	96.3	16.9	 16
479	  2	89.0	13.6	 16
480	  2	75.5	16.7	 16
481	  2	74.5	14.5	 16
482	  2	134.8	34.0	 16
483	  2	89.8	12.4	 16
484	  2	124.0	16.1	 16
485	  2	138.3	18.5	 16
486	  2	74.0	15.1	 16
487	  2	84.3	12.2	 16
488	  2	66.3	14.2	 16
489	  2	76.8	10.9	 16
490	  2	109.3	17.9	 16
491	  2	105.3	15.5	 20
492	  2	79.5	15.0	 16
493	  2	204.0	31.3	 16
494	  2	103.3	16.7	 16
495	  2	95.3	17.8	 16
496	  2	152.8	18.1	 16
497	  2	320.3	51.0	 16
498	  2	71.5	14.1	 16
499	  2	72.5	11.2	 16
500	  2	80.3	9.2	 16
501	  2	122.3	19.1	 16
502	  2	151.8	25.3	 16
503	  2	85.5	15.4	 16
504	  2	73.0	10.8	 16
505	  2	70.3	13.4	 16
506	  2	250.5	34.4	 16
507	  2	136.3	20.2	 16
508	  2	100.0	16.6	 16
509	  2	174.5	22.3	 16
510	  2	174.8	25.9	 16
511	  2	206.5	33.0	 16
512	  2	85.8	13.9	 16
513	  2	232.8	26.1	 16
514	  2	119.0	17.5	 16
515	  2	94.5	12.3	 16
516	  2	90.8	19.9	 16
517	  2	113.3	13.9	 16
518	  2	258.0	26.8	 16
519	  2	189.5	25.8	 16
520	  2	83.5	10.6	 16
521	  2	67.3	8.2	 16
522	  2	113.0	15.2	 16
523	  2	99.3	13.3	 16
524	  2	600.8	81.1	 16
525	  2	266.5	24.4	 16
526	  2	218.0	29.7	 16
527	  2	127.5	17.3	 16
528	  2	102.8	12.5	 16
529	  2	142.3	15.7	 16
530	  2	129.8	14.4	 16
531	  2	79.0	13.5	 16
532	  2	68.8	21.6	 16
533	  2	160.8	30.0	 16
534	  2	151.0	21.7	 16
535	  2	89.0	35.7	 16
536	  2	69.3	13.1	 16
537	  2	85.0	13.5	 16
538	  2	111.3	15.6	 16
539	  2	105.0	16.7	 16
540	  2	133.5	28.2	 16
541	  2	103.0	14.1	 16
542	  2	162.5	28.7	 16
543	  2	310.8	32.7	 16
544	  2	182.5	17.8	 16
545	  2	177.5	26.0	 16
546	  2	99.5	14.9	 16
547	  2	198.0	25.7	 16
548	  2	66.0	13.3	 16
549	  2	78.5	6.1	 16
550	  2	90.0	16.5	 16
551	  2	95.8	13.0	 16
552	  2	84.0	11.7	 16
553	  2	101.8	19.8	 16
554	  2	82.5	14.0	 16
555	  2	90.5	14.8	 16
556	  2	92.0	20.6	 16
557	  2	159.8	34.7	 16
558	  2	158.8	20.0	 16
559	  2	273.5	39.9	 16
560	  2	2469.8	182.2	 16
561	  2	180.8	30.5	 16
562	  2	186.0	25.2	 16
563	  2	106.5	14.7	 16
564	  2	129.0	13.1	 16
565	  2	144.8	13.9	 16
566	  2	144.0	18.6	 16
567	  2	77.0	9.6	 16
568	  2	143.3	20.7	 16
569	  2	108.0	18.8	 16
570	  2	88.0	14.6	 16
571	  2	81.8	13.7	 16
572	  2	77.0	11.4	 16
573	  2	142.8	19.6	 16
574	  2	79.5	17.3	 16
575	  2	70.8	9.7	 16
576	  2	89.5	15.5	 16
577	  2	85.5	13.1	 16
578	  2	121.5	23.9	 16
579	  2	121.0	12.2	 16
580	  2	201.5	38.6	 16
581	  2	127.0	28.3	 16
582	  2	167.5	26.4	 16
583	  2	238.5	32.0	 16
584	  2	128.5	19.7	 16
585	  2	127.8	18.5	 16
586	  2	117.0	15.6	 16
587	  2	114.3	23.9	 16
588	  2	109.5	14.2	 16
589	  2	192.8	21.2	 16
590	  2	161.3	45.7	 16
591	  2	78.0	10.3	 16
592	  2	83.3	13.9	 16
593	  2	75.5	11.2	 16
594	  2	90.3	10.5	 16
595	  2	81.5	16.9	 16
596	  2	171.5	23.0	 16
597	  2	218.3	22.7	 16
598	  2	222.0	21.8	 16
599	  2	247.3	29.7	 16
600	  2	176.0	22.7	 16
601	  2	181.8	21.0	 16
602	  2	168.0	34.2	 16
603	  2	107.8	14.0	 16
604	  2	153.0	27.9	 16
605	  2	70.0	11.8	 16
606	  2	71.5	11.5	 16
607	  2	91.3	14.6	 16
608	  2	121.8	22.8	 16
609	  2	291.0	60.0	 16
610	  2	138.3	16.6	 16
611	  2	88.5	31.5	 16
612	  2	129.8	21.1	 16
613	  2	72.8	15.7	 16
614	  2	116.3	21.6	 16
615	  2	79.3	11.1	 16
616	  2	83.5	13.8	 16
617	  2	95.0	15.8	 16
618	  2	93.3	17.1	 16
619	  2	88.5	15.5	 16
620	  2	149.5	19.0	 16
621	  2	98.3	15.7	 16
622	  2	129.5	13.4	 16
623	  2	95.3	28.3	 16
624	  2	101.3	13.9	 16
625	  2	105.3	14.7	 16
626	  2	188.0	26.1	 16
627	  2	98.3	16.5	 16
628	  2	574.3	66.9	 16
629	  2	119.0	19.3	 16
630	  2	100.5	7.5	 16
631	  2	101.3	18.3	 16
632	  2	136.8	21.4	 16
633	  2	134.5	19.6	 16
634	  2	90.3	12.8	 16
635	  2	77.5	13.9	 16
636	  2	120.0	18.4	 16
637	  2	173.5	23.1	 16
638	  2	104.3	12.7	 16
639	  2	93.3	12.0	 16
640	  2	142.5	20.3	 16
641	  2	127.0	19.1	 16
642	  2	109.3	16.9	 16
643	  2	118.0	16.5	 16
644	  2	221.3	23.6	 16
645	  2	76.3	9.2	 16
646	  2	99.3	42.2	 16
647	  2	123.8	20.4	 16
648	  2	88.5	13.3	 16
649	  2	84.3	13.7	 16
650	  2	115.3	20.0	 16
651	  2	73.8	13.6	 16
652	  2	105.5	19.4	 16
653	  2	89.3	13.7	 16
654	  2	99.3	13.1	 16
655	  2	137.8	26.0	 16
656	  2	92.0	20.9	 16
657	  2	187.0	39.1	 16
658	  2	64.5	12.8	 16
659	  2	146.3	34.5	 16
660	  2	90.3	16.5	 16
661	  2	82.3	11.2	 16
662	  2	71.3	13.6	 16
663	  2	96.0	14.1	 16
664	  2	95.0	15.3	 16
665	  2	66.0	15.4	 16
666	  2	78.0	13.1	 16
667	  2	431.5	74.2	 16
668	  2	107.3	19.3	 16
669	  2	121.5	19.0	 20
670	  2	96.0	17.5	 16
671	  2	103.3	18.6	 16
672	  2	127.8	17.6	 16
673	  2	115.8	16.4	 16
674	  2	256.5	19.5	 16
675	  2	120.5	20.1	 16
676	  2	154.3	20.9	 16
677	  2	145.0	15.9	 16
678	  2	114.3	14.0	 16
679	  2	188.8	31.4	 16
680	  2	454.8	39.2	 16
681	  2	73.5	8.8	 16
682	  2	114.8	41.8	 16
683	  2	102.3	7.4	 16
684	  2	223.3	22.1	 16
685	  2	86.0	15.2	 16
686	  2	262.3	36.3	 16
687	  2	117.0	10.5	 16
688	  2	103.3	16.0	 16
689	  2	76.5	16.6	 16
690	  2	77.3	13.3	 16
691	  2	189.0	24.3	 16
692	  2	256.3	29.4	 16
693	  2	78.3	26.5	 16
694	  2	86.3	10.7	 16
695	  2	85.3	13.1	 16
696	  2	76.0	11.9	 16
697	  2	92.5	17.9	 16
698	  2	82.5	62.9	 16
699	  2	71.3	10.4	 16
700	  2	70.5	10.7	 16
701	  2	78.3	10.3	 16
702	  2	186.0	26.4	 16
703	  2	160.0	15.3	 16
704	  2	161.5	13.9	 16
705	  2	171.8	31.8	 16
706	  2	83.3	14.7	 16
707	  2	61.3	7.6	 16
708	  2	125.5	20.2	 16
709	  2	5681.0	616.2	 16
710	  2	106.8	18.7	 16
711	  2	343.0	63.5	 16
  0	  3	8829.5	815.9	 16
  1	  3	134.8	16.2	 16
  2	  3	7680.8	654.8	 16
  3	  3	132.8	22.0	 16
  4	  3	59.8	13.7	 16
  5	  3	164.3	20.6	 16
  6	  3	85.5	14.9	 16
  7	  3	190.8	23.4	 16
  8	  3	64.0	8.8	 16
  9	  3	249.8	38.9	 16
 10	  3	163.0	19.5	 16
 11	  3	291.3	40.8	 16
 12	  3	150.3	17.1	 16
 13	  3	172.3	17.3	 16
 14	  3	141.0	23.8	 16
 15	  3	154.3	29.6	 16
 16	  3	280.8	48.8	 16
 17	  3	424.0	53.1	 16
 18	  3	501.0	54.4	 16
 19	  3	206.3	30.5	 16
 20	  3	122.0	21.1	 16
 21	  3	90.5	16.9	 16
 22	  3	191.3	25.5	 16
 23	  3	1570.5	146.1	 16
 24	  3	99.5	14.3	 16
 25	  3	183.3	25.5	 16
 26	  3	144.5	19.6	 16
 27	  3	111.5	17.3	 16
 28	  3	117.5	12.8	 16
 29	  3	126.0	21.5	 16
 30	  3	150.0	21.8	 16
 31	  3	171.0	20.6	 16
 32	  3	109.5	12.5	 16
 33	  3	264.3	35.6	 16
 34	  3	152.0	26.6	 16
 35	  3	145.5	19.1	 16
 36	  3	202.0	26.5	 16
 37	  3	646.3	94.6	 16
 38	  3	175.0	22.4	 16
 39	  3	96.5	13.5	 16
 40	  3	145.0	16.5	 16
 41	  3	548.3	47.7	 16
 42	  3	561.8	83.0	 16
 43	  3	122.5	22.6	 16
 44	  3	190.5	24.1	 16
 45	  3	111.0	20.7	 16
 46	  3	162.0	20.8	 16
 47	  3	333.3	29.8	 16
 48	  3	87.5	16.4	 16
 49	  3	104.3	14.2	 16
 50	  3	117.3	19.8	 16
 51	  3	177.8	28.7	 16
 52	  3	211.3	33.0	 16
 53	  3	94.0	13.2	 16
 54	  3	103.3	23.5	 16
 55	  3	177.8	22.4	 16
 56	  3	270.0	35.7	 16
 57	  3	233.0	26.2	 16
 58	  3	104.3	12.7	 16
 59	  3	250.5	28.9	 16
 60	  3	108.8	22.9	 16
 61	  3	206.8	26.0	 16
 62	  3	245.3	44.4	 16
 63	  3	146.3	37.1	 16
 64	  3	3059.8	503.2	 16
 65	  3	149.5	18.0	 16
 66	  3	135.0	16.4	 16
 67	  3	211.3	31.7	 16
 68	  3	89.8	14.5	 16
 69	  3	119.8	21.9	 16
 70	  3	192.8	29.9	 16
 71	  3	175.0	18.4	 16
 72	  3	171.0	32.6	 16
 73	  3	738.3	68.4	 16
 74	  3	172.8	17.8	 16
 75	  3	99.3	14.1	 16
 76	  3	87.3	21.6	 16
 77	  3	106.8	12.6	 16
 78	  3	159.5	19.0	 16
 79	  3	136.5	23.3	 16
 80	  3	94.0	13.4	 16
 81	  3	117.5	17.3	 16
 82	  3	104.5	15.5	 16
 83	  3	517.0	53.4	 16
 84	  3	274.3	29.2	 16
 85	  3	125.8	17.7	 16
 86	  3	99.8	18.6	 16
 87	  3	134.3	20.7	 16
 88	  3	353.5	40.2	 16
 89	  3	248.0	21.4	 16
 90	  3	154.3	20.2	 16
 91	  3	329.3	32.1	 16
 92	  3	353.5	30.7	 16
 93	  3	382.5	40.2	 16
 94	  3	362.3	35.1	 16
 95	  3	369.0	39.7	 16
 96	  3	400.0	45.2	 16
 97	  3	335.0	30.2	 16
 98	  3	288.8	51.2	 16
 99	  3	86.5	10.4	 16
100	  3	133.3	21.7	 16
101	  3	231.5	28.8	 16
102	  3	90.8	15.2	 16
103	  3	486.5	76.1	 16
104	  3	125.8	17.1	 16
105	  3	107.3	15.0	 16
106	  3	111.5	15.7	 16
107	  3	261.0	43.4	 16
108	  3	116.3	31.0	 16
109	  3	174.0	20.1	 16
110	  3	117.3	15.9	 16
111	  3	203.3	25.1	 16
112	  3	166.8	18.0	 16
113	  3	379.8	33.5	 16
114	  3	141.3	22.0	 16
115	  3	116.3	21.7	 16
116	  3	150.0	25.2	 16
117	  3	138.5	23.3	 16
118	  3	154.3	17.7	 16
119	  3	261.0	50.2	 16
120	  3	137.8	16.2	 16
121	  3	327.5	39.7	 12
122	  3	99.0	14.3	 16
123	  3	72.3	9.1	 16
124	  3	81.5	13.5	 16
125	  3	101.5	19.7	 16
126	  3	135.0	21.2	 16
127	  3	103.5	14.4	 16
128	  3	78.8	11.1	 16
129	  3	75.5	12.1	 16
130	  3	484.5	54.5	 16
131	  3	275.5	38.5	 16
132	  3	336.3	40.8	 16
133	  3	152.3	21.1	 16
134	  3	245.0	33.5	 16
135	  3	291.3	34.6	 16
136	  3	921.8	164.1	 16
137	  3	105.0	12.1	 16
138	  3	291.0	28.4	 16
139	  3	606.0	56.5	 16
140	  3	102.0	12.4	 16
141	  3	106.8	14.2	 16
142	  3	1028.8	98.7	 16
143	  3	311.5	34.8	 16
144	  3	86.0	21.0	 16
145	  3	85.5	25.5	 16
146	  3	4265.5	881.5	 16
147	  3	611.5	62.6	 16
148	  3	196.3	23.0	 16
149	  3	149.3	30.1	 16
150	  3	105.8	11.6	 16
151	  3	313.3	52.7	 16
152	  3	367.3	51.4	 16
153	  3	151.5	18.3	 16
154	  3	82.5	16.6	 20
155	  3	1126.0	145.2	 16
156	  3	93.8	13.3	 16
157	  3	122.8	15.5	 16
158	  3	94.3	13.8	 16
159	  3	370.5	65.1	 16
160	  3	174.0	26.2	 16
161	  3	393.3	59.2	 16
162	  3	3630.5	696.9	 16
163	  3	375.5	137.0	 16
164	  3	240.3	21.9	 16
165	  3	227.0	26.1	 16
166	  3	116.5	19.1	 16
167	  3	202.8	30.2	 16
168	  3	1017.8	113.7	 16
169	  3	102.5	18.4	 16
170	  3	123.3	19.0	 16
171	  3	76.3	15.6	 16
172	  3	171.5	24.8	 16
173	  3	67.5	12.2	 16
174	  3	114.5	16.1	 16
175	  3	78.0	13.1	 16
176	  3	2261.3	451.7	 16
177	  3	72.0	12.9	 16
178	  3	71.0	10.9	 16
179	  3	216.0	82.5	 16
180	  3	187.0	27.6	 16
181	  3	83.5	13.2	 16
182	  3	94.5	16.2	 16
183	  3	117.3	13.9	 16
184	  3	120.5	16.8	 16
185	  3	111.8	16.3	 16
186	  3	79.5	10.5	 16
187	  3	79.0	12.2	 16
188	  3	80.3	10.8	 16
189	  3	93.5	15.4	 16
190	  3	135.5	22.2	 16
191	  3	181.8	15.7	 16
192	  3	346.8	38.2	 16
193	  3	145.0	15.0	 16
194	  3	207.5	23.5	 16
195	  3	275.0	43.3	 16
196	  3	141.5	22.5	 16
197	  3	135.3	21.8	 16
198	  3	138.5	17.8	 16
199	  3	165.5	19.9	 16
200	  3	130.5	19.3	 16
201	  3	373.3	52.5	 16
202	  3	1270.0	142.2	 16
203	  3	122.0	19.7	 16
204	  3	113.0	21.5	 16
205	  3	82.8	12.4	 16
206	  3	96.5	17.8	 16
207	  3	352.5	49.3	 16
208	  3	82.0	17.5	 16
209	  3	107.5	17.5	 16
210	  3	113.3	34.2	 16
211	  3	88.5	15.3	 16
212	  3	90.0	14.2	 16
213	  3	86.5	18.7	 16
214	  3	70.8	11.2	 16
215	  3	268.3	34.0	 16
216	  3	81.5	10.6	 16
217	  3	151.3	17.3	 16
218	  3	121.3	17.6	 16
219	  3	144.5	25.3	 16
220	  3	125.8	18.6	 16
221	  3	180.5	23.1	 16
222	  3	89.5	14.4	 16
223	  3	142.5	20.6	 16
224	  3	83.8	14.3	 16
225	  3	101.8	18.3	 16
226	  3	150.8	20.4	 16
227	  3	81.3	18.6	 16
228	  3	97.3	10.5	 16
229	  3	114.5	21.3	 16
230	  3	589.5	99.9	 16
231	  3	264.3	47.0	 16
232	  3	81.0	11.9	 16
233	  3	106.5	14.3	 16
234	  3	79.3	12.5	 16
235	  3	69.0	22.9	 16
236	  3	51.0	7.9	 16
237	  3	56.0	12.5	 16
238	  3	53.3	10.4	 16
239	  3	58.3	11.2	 16
240	  3	135.0	18.4	 16
241	  3	170.0	14.4	 16
242	  3	76.8	14.9	 16
243	  3	322.5	32.6	 16
244	  3	103.3	16.7	 16
245	  3	115.3	16.4	 16
246	  3	183.0	20.5	 16
247	  3	96.8	18.3	 16
248	  3	78.5	16.8	 16
249	  3	80.8	12.0	 16
250	  3	134.0	14.4	 16
251	  3	113.3	11.4	 16
252	  3	196.5	19.2	 16
253	  3	91.8	12.5	 16
254	  3	82.3	13.9	 16
255	  3	273.0	52.4	 16
256	  3	110.8	16.0	 16
257	  3	108.5	19.7	 16
258	  3	432.5	48.9	 16
259	  3	231.5	41.8	 16
260	  3	90.0	11.8	 16
261	  3	71.0	11.4	 16
262	  3	73.5	14.3	 16
263	  3	115.0	22.6	 16
264	  3	377.5	56.2	 16
265	  3	202.5	34.0	 16
266	  3	223.0	28.5	 16
267	  3	158.0	24.0	 16
268	  3	78.8	13.4	 16
269	  3	328.5	31.7	 16
270	  3	378.3	117.5	 16
271	  3	117.5	13.3	 16
272	  3	105.3	14.7	 16
273	  3	416.5	40.7	 16
274	  3	1084.0	111.8	 16
275	  3	219.5	35.5	 16
276	  3	125.3	18.7	 16
277	  3	184.3	17.9	 16
278	  3	163.8	28.3	 16
279	  3	179.8	27.1	 16
280	  3	121.5	14.1	 16
281	  3	74.0	9.1	 16
282	  3	235.0	41.3	 16
283	  3	165.3	26.5	 16
284	  3	127.0	18.1	 16
285	  3	162.5	24.5	 16
286	  3	111.3	13.5	 16
287	  3	98.0	12.6	 16
288	  3	193.8	25.0	 16
289	  3	103.5	19.7	 16
290	  3	124.3	16.2	 16
291	  3	91.0	14.5	 16
292	  3	182.5	23.3	 16
293	  3	882.3	92.8	 16
294	  3	206.5	21.6	 16
295	  3	94.3	12.0	 16
296	  3	177.0	24.6	 16
297	  3	2318.5	285.7	 16
298	  3	405.8	69.6	 16
299	  3	527.3	40.8	 16
300	  3	238.8	31.0	 16
301	  3	119.3	15.4	 16
302	  3	106.3	18.8	 16
303	  3	76.3	8.5	 16
304	  3	123.0	24.1	 16
305	  3	84.0	14.3	 16
306	  3	82.3	11.7	 16
307	  3	108.8	15.7	 16
308	  3	93.5	13.6	 16
309	  3	2128.3	420.4	 16
310	  3	2610.3	317.2	 16
311	  3	174.3	22.7	 16
312	  3	246.8	38.1	 16
313	  3	225.8	23.8	 16
314	  3	138.3	21.1	 16
315	  3	247.8	43.9	 16
316	  3	822.0	108.8	 16
317	  3	334.3	49.6	 16
318	  3	148.3	26.6	 16
319	  3	84.8	13.3	 16
320	  3	157.8	28.3	 16
321	  3	164.3	7.7	 16
322	  3	104.0	16.1	 16
323	  3	175.0	23.0	 16
324	  3	164.3	15.7	 16
325	  3	150.8	16.4	 16
326	  3	976.3	197.3	 16
327	  3	86.8	11.6	 16
328	  3	141.3	16.9	 16
329	  3	420.5	68.8	 16
330	  3	98.5	24.2	 16
331	  3	85.5	14.7	 16
332	  3	76.5	14.2	 20
333	  3	92.0	14.6	 16
334	  3	154.0	26.4	 16
335	  3	80.0	11.3	 16
336	  3	72.3	13.2	 16
337	  3	79.8	14.0	 16
338	  3	85.0	13.4	 16
339	  3	98.3	17.6	 16
340	  3	101.3	16.0	 16
341	  3	1648.0	197.0	 16
342	  3	125.0	19.8	 16
343	  3	125.0	18.8	 16
344	  3	143.8	25.5	 16
345	  3	178.0	21.6	 16
346	  3	148.3	21.5	 16
347	  3	99.0	15.1	 16
348	  3	885.8	84.3	 16
349	  3	275.3	35.6	 16
350	  3	92.3	12.5	 16
351	  3	92.8	14.1	 16
352	  3	84.3	13.0	 16
353	  3	76.0	7.5	 16
354	  3	183.0	27.0	 16
355	  3	109.0	14.2	 16
356	  3	84.3	12.3	 16
357	  3	151.5	24.7	 16
358	  3	63.3	10.6	 16
359	  3	95.5	19.7	 16
360	  3	96.5	14.5	 16
361	  3	1219.5	199.4	 16
362	  3	1434.8	212.8	 16
363	  3	1600.5	296.1	 16
364	  3	168.8	21.8	 16
365	  3	208.3	39.8	 16
366	  3	85.0	13.4	 16
367	  3	92.3	17.0	 16
368	  3	104.5	21.9	 16
369	  3	109.0	20.0	 16
370	  3	100.3	15.7	 16
371	  3	495.3	76.8	 16
372	  3	125.3	27.9	 16
373	  3	687.0	54.1	 16
374	  3	129.3	53.8	 16
375	  3	87.8	18.0	 16
376	  3	179.5	18.7	 16
377	  3	93.8	16.8	 16
378	  3	113.5	20.7	 16
379	  3	141.8	21.1	 16
380	  3	118.5	22.9	 16
381	  3	897.5	56.7	 16
382	  3	391.5	38.5	 16
383	  3	343.8	34.0	 16
384	  3	94.3	12.0	 16
385	  3	84.3	15.2	 16
386	  3	67.5	11.7	 16
387	  3	178.8	20.9	 16
388	  3	84.5	13.1	 16
389	  3	184.0	20.2	 16
390	  3	186.5	30.1	 16
391	  3	88.0	14.1	 16
392	  3	159.3	20.1	 16
393	  3	104.0	17.3	 16
394	  3	331.5	34.2	 16
395	  3	115.3	17.8	 16
396	  3	607.0	66.2	 16
397	  3	89.5	13.8	 16
398	  3	82.0	11.7	 16
399	  3	85.0	17.4	 16
400	  3	738.3	98.2	 16
401	  3	340.0	49.5	 16
402	  3	209.5	26.9	 16
403	  3	87.3	12.9	 16
404	  3	82.8	16.6	 16
405	  3	197.5	19.8	 16
406	  3	125.8	23.5	 16
407	  3	120.0	18.3	 16
408	  3	116.3	17.4	 16
409	  3	137.0	22.4	 16
410	  3	162.5	24.0	 16
411	  3	338.0	52.8	 16
412	  3	198.3	30.3	 16
413	  3	990.3	140.3	 16
414	  3	95.0	15.3	 16
415	  3	95.3	13.0	 16
416	  3	142.3	23.3	 16
417	  3	115.8	12.5	 16
418	  3	144.0	23.5	 16
419	  3	117.5	27.5	 16
420	  3	87.0	16.0	 16
421	  3	464.5	80.8	 16
422	  3	653.8	127.2	 16
423	  3	127.5	22.2	 16
424	  3	92.0	14.5	 16
425	  3	1167.0	173.1	 16
426	  3	77.0	15.0	 16
427	  3	85.3	12.2	 16
428	  3	94.0	20.3	 16
429	  3	457.8	67.0	 16
430	  3	137.3	21.3	 16
431	  3	93.3	17.5	 16
432	  3	112.8	14.1	 16
433	  3	1256.5	200.1	 16
434	  3	161.8	28.5	 16
435	  3	138.8	25.4	 16
436	  3	80.3	13.2	 16
437	  3	73.0	12.2	 16
438	  3	80.0	11.3	 16
439	  3	108.3	13.8	 16
440	  3	97.3	20.9	 16
441	  3	207.5	30.4	 16
442	  3	602.8	55.0	 16
443	  3	512.8	66.3	 16
444	  3	112.3	18.8	 16
445	  3	79.8	12.5	 16
446	  3	86.0	15.5	 16
447	  3	80.0	14.2	 16
448	  3	244.3	33.8	 16
449	  3	87.3	12.6	 16
450	  3	301.3	35.9	 16
451	  3	69.8	8.5	 16
452	  3	356.3	55.3	 16
453	  3	389.8	54.2	 16
454	  3	611.5	66.1	 16
455	  3	349.0	25.5	 16
456	  3	406.8	53.3	 16
457	  3	135.3	21.5	 16
458	  3	94.0	19.6	 16
459	  3	171.5	19.6	 16
460	  3	333.0	31.6	 16
461	  3	664.8	54.9	 16
462	  3	105.3	16.9	 16
463	  3	67.5	12.2	 16
464	  3	895.3	99.2	 16
465	  3	1989.3	194.5	 16
466	  3	2093.3	101.9	 16
467	  3	2119.8	104.0	 16
468	  3	145.0	24.2	 16
469	  3	118.5	16.5	 16
470	  3	597.5	93.3	 16
471	  3	78.0	14.0	 16
472	  3	61.3	11.8	 16
473	  3	51.3	6.8	 16
474	  3	55.3	9.9	 16
475	  3	46.3	10.1	 16
476	  3	53.3	10.5	 16
477	  3	219.3	32.5	 16
478	  3	122.0	18.1	 16
479	  3	102.5	20.5	 16
480	  3	81.0	15.8	 16
481	  3	96.0	17.3	 16
482	  3	101.3	11.5	 16
483	  3	212.5	26.7	 16
484	  3	118.3	18.1	 16
485	  3	241.3	26.5	 16
486	  3	116.3	13.7	 16
487	  3	94.0	10.7	 16
488	  3	153.0	27.1	 16
489	  3	74.3	11.3	 16
490	  3	73.5	9.7	 16
491	  3	137.5	17.0	 16
492	  3	130.5	22.5	 16
493	  3	119.5	16.6	 16
494	  3	109.8	17.4	 16
495	  3	686.8	85.3	 16
496	  3	360.8	42.0	 16
497	  3	256.5	25.6	 16
498	  3	105.5	14.2	 16
499	  3	92.8	15.9	 16
500	  3	174.5	34.9	 16
501	  3	169.3	24.1	 16
502	  3	404.5	48.6	 16
503	  3	75.5	13.1	 16
504	  3	73.0	13.9	 16
505	  3	2712.3	442.1	 16
506	  3	185.3	19.3	 16
507	  3	163.0	14.9	 16
508	  3	107.8	14.2	 16
509	  3	164.0	27.8	 16
510	  3	231.5	30.2	 20
511	  3	155.0	24.9	 16
512	  3	549.5	67.9	 16
513	  3	82.5	18.2	 16
514	  3	71.3	11.0	 16
515	  3	81.3	10.4	 16
516	  3	324.0	44.9	 16
517	  3	247.3	43.6	 16
518	  3	119.8	17.4	 16
519	  3	205.5	26.3	 16
520	  3	84.5	12.7	 16
521	  3	103.8	20.2	 16
522	  3	386.5	54.4	 16
523	  3	299.3	53.3	 16
524	  3	231.0	35.3	 16
525	  3	88.5	13.2	 16
526	  3	82.3	11.3	 16
527	  3	108.8	15.3	 16
528	  3	85.0	15.2	 16
529	  3	132.3	28.2	 16
530	  3	85.0	13.7	 16
531	  3	81.5	17.7	 16
532	  3	114.0	18.0	 16
533	  3	92.0	15.4	 16
534	  3	276.5	36.7	 16
535	  3	221.5	22.8	 16
536	  3	147.3	20.7	 16
537	  3	117.5	16.8	 16
538	  3	103.8	18.1	 16
539	  3	312.3	46.9	 16
540	  3	69.8	11.3	 16
541	  3	164.8	20.8	 16
542	  3	197.5	27.8	 16
543	  3	174.5	24.6	 16
544	  3	265.3	21.8	 16
545	  3	245.0	28.9	 16
546	  3	138.3	21.7	 16
547	  3	177.0	23.1	 16
548	  3	426.5	40.6	 16
549	  3	118.3	19.2	 16
550	  3	97.3	15.1	 16
551	  3	129.5	20.7	 16
552	  3	655.0	97.8	 16
553	  3	91.5	12.5	 16
554	  3	2317.0	324.6	 16
555	  3	76.5	8.9	 16
556	  3	129.5	21.7	 16
557	  3	111.0	11.0	 16
558	  3	439.0	71.8	 16
559	  3	193.8	32.5	 16
560	  3	1209.3	135.3	 16
561	  3	550.8	38.1	 16
562	  3	239.0	24.8	 16
563	  3	158.8	24.7	 16
564	  3	305.8	43.7	 16
565	  3	162.0	19.7	 16
566	  3	576.3	87.9	 16
567	  3	71.0	11.3	 16
568	  3	114.3	21.4	 16
569	  3	128.0	21.1	 16
570	  3	75.3	7.9	 16
571	  3	77.0	16.5	 16
572	  3	367.5	85.3	 16
573	  3	101.8	17.0	 16
574	  3	109.8	20.4	 16
575	  3	216.3	30.6	 16
576	  3	160.0	30.8	 16
577	  3	211.3	29.6	 16
578	  3	89.5	10.8	 16
579	  3	107.8	18.9	 16
580	  3	127.3	19.3	 16
581	  3	123.8	19.8	 16
582	  3	118.3	20.1	 16
583	  3	189.3	19.9	 16
584	  3	234.3	34.2	 16
585	  3	116.0	17.2	 16
586	  3	173.5	21.7	 16
587	  3	137.3	25.4	 16
588	  3	118.0	26.7	 16
589	  3	154.3	23.6	 16
590	  3	247.8	38.9	 16
591	  3	90.3	16.9	 16
592	  3	204.3	21.9	 16
593	  3	199.0	41.8	 16
594	  3	100.3	12.9	 16
595	  3	134.5	30.2	 16
596	  3	152.3	17.9	 16
597	  3	154.5	22.1	 16
598	  3	106.0	16.4	 16
599	  3	147.0	29.3	 16
600	  3	226.8	36.3	 16
601	  3	204.3	21.4	 16
602	  3	267.0	31.9	 16
603	  3	460.5	57.6	 16
604	  3	133.8	18.6	 16
605	  3	552.0	101.5	 16
606	  3	117.3	13.9	 16
607	  3	170.0	26.3	 16
608	  3	176.8	24.5	 16
609	  3	225.3	29.9	 16
610	  3	411.3	55.1	 16
611	  3	201.3	18.8	 16
612	  3	102.8	16.7	 16
613	  3	66.5	10.2	 16
614	  3	208.5	35.0	 16
615	  3	77.0	13.8	 16
616	  3	121.3	18.4	 16
617	  3	177.8	23.3	 16
618	  3	103.8	16.5	 16
619	  3	84.0	15.6	 16
620	  3	1259.3	206.6	 16
621	  3	82.3	10.5	 16
622	  3	80.0	13.8	 16
623	  3	86.3	14.2	 16
624	  3	71.3	9.7	 16
625	  3	131.0	18.0	 16
626	  3	125.0	14.0	 16
627	  3	1138.8	191.8	 16
628	  3	356.8	51.3	 16
629	  3	218.0	26.6	 16
630	  3	145.8	23.7	 16
631	  3	464.0	98.9	 16
632	  3	83.3	11.9	 16
633	  3	168.3	35.9	 16
634	  3	136.3	15.1	 16
635	  3	132.0	17.9	 16
636	  3	124.8	19.5	 16
637	  3	467.8	89.2	 16
638	  3	88.5	12.1	 16
639	  3	195.8	29.9	 16
640	  3	356.8	66.0	 16
641	  3	103.0	16.6	 16
642	  3	75.0	13.1	 16
643	  3	87.0	11.3	 16
644	  3	159.3	25.5	 16
645	  3	283.5	48.2	 16
646	  3	1891.3	472.5	 16
647	  3	66.8	12.1	 16
648	  3	125.5	27.6	 16
649	  3	84.0	17.3	 16
650	  3	64.5	12.1	 16
651	  3	91.0	15.1	 16
652	  3	85.3	13.6	 16
653	  3	62.0	10.1	 16
654	  3	63.5	12.9	 16
655	  3	91.8	29.7	 16
656	  3	121.0	18.3	 16
657	  3	68.0	15.2	 16
658	  3	75.8	15.9	 16
659	  3	72.3	16.7	 16
660	  3	117.8	15.6	 16
661	  3	283.5	55.9	 16
662	  3	186.3	34.7	 16
663	  3	317.5	42.0	 16
664	  3	87.3	12.7	 16
665	  3	143.0	30.4	 16
666	  3	597.5	134.5	 16
667	  3	85.5	14.8	 16
668	  3	137.3	23.6	 16
669	  3	131.3	17.0	 16
670	  3	91.3	11.0	 16
671	  3	456.5	93.0	 16
672	  3	122.0	14.6	 16
673	  3	488.3	82.1	 16
674	  3	164.8	27.4	 16
675	  3	156.3	39.2	 16
676	  3	195.8	32.7	 16
677	  3	131.3	19.4	 16
678	  3	70.3	13.3	 16
679	  3	81.5	14.8	 16
680	  3	116.8	17.0	 16
681	  3	80.0	14.1	 16
682	  3	124.0	22.5	 16
683	  3	93.3	13.5	 16
684	  3	72.0	9.3	 16
685	  3	106.5	13.0	 16
686	  3	179.3	34.2	 16
687	  3	82.3	13.2	 16
688	  3	89.0	14.5	 20
689	  3	152.8	27.9	 16
690	  3	1495.5	262.1	 16
691	  3	136.3	17.0	 16
692	  3	284.3	35.7	 16
693	  3	112.5	21.4	 16
694	  3	164.3	26.8	 16
695	  3	152.0	22.8	 16
696	  3	233.5	35.8	 16
697	  3	78.5	10.9	 16
698	  3	96.5	20.9	 16
699	  3	148.8	19.9	 16
700	  3	657.8	92.2	 16
701	  3	227.3	25.0	 16
702	  3	111.3	19.3	 16
703	  3	169.3	15.1	 16
704	  3	190.0	29.3	 16
705	  3	277.0	44.9	 16
706	  3	96.0	10.8	 16
707	  3	62.0	12.4	 16
708	  3	5626.3	825.1	 16
709	  3	109.5	21.9	 16
710	  3	5626.0	477.7	 16
711	  3	153.8	20.1	 16
  0	  4	59.8	11.8	 16
  1	  4	64.3	12.1	 16
  2	  4	68.8	15.3	 16
  3	  4	61.0	17.6	 16
  4	  4	58.3	12.2	 16
  5	  4	135.0	21.8	 16
  6	  4	81.0	12.0	 16
  7	  4	157.0	19.7	 16
  8	  4	80.0	13.8	 16
  9	  4	95.5	13.4	 16
 10	  4	83.0	14.9	 16
 11	  4	160.3	22.8	 16
 12	  4	105.3	15.9	 16
 13	  4	162.5	20.9	 16
 14	  4	115.5	14.1	 16
 15	  4	157.5	21.0	 16
 16	  4	178.8	39.2	 16
 17	  4	1496.3	88.7	 16
 18	  4	570.5	49.6	 16
 19	  4	451.5	61.8	 16
 20	  4	103.5	18.1	 16
 21	  4	87.0	16.4	 16
 22	  4	206.5	22.5	 16
 23	  4	238.3	29.6	 16
 24	  4	86.5	14.1	 16
 25	  4	164.3	23.0	 16
 26	  4	140.8	18.3	 16
 27	  4	130.5	25.8	 16
 28	  4	126.5	21.3	 16
 29	  4	138.3	17.0	 16
 30	  4	120.5	18.2	 16
 31	  4	162.8	29.0	 16
 32	  4	131.3	13.0	 16
 33	  4	146.0	20.7	 16
 34	  4	138.8	25.5	 16
 35	  4	258.5	24.3	 16
 36	  4	157.5	17.3	 16
 37	  4	167.0	21.6	 16
 38	  4	170.8	23.7	 16
 39	  4	112.8	15.7	 16
 40	  4	133.0	22.0	 16
 41	  4	153.8	28.5	 16
 42	  4	149.3	27.7	 16
 43	  4	135.5	18.1	 16
 44	  4	134.0	18.3	 16
 45	  4	102.8	19.8	 16
 46	  4	172.5	22.3	 16
 47	  4	169.8	20.1	 16
 48	  4	88.0	14.4	 16
 49	  4	107.3	17.7	 16
 50	  4	226.8	24.9	 16
 51	  4	161.8	22.6	 16
 52	  4	130.3	21.8	 16
 53	  4	105.3	13.9	 16
 54	  4	174.3	41.8	 12
 55	  4	200.0	36.8	 16
 56	  4	218.3	25.0	 16
 57	  4	185.0	28.7	 16
 58	  4	123.3	11.8	 16
 59	  4	145.0	20.4	 16
 60	  4	107.5	13.8	 16
 61	  4	241.5	33.9	 16
 62	  4	111.8	12.1	 16
 63	  4	262.3	25.3	 16
 64	  4	812.8	136.7	 16
 65	  4	116.0	13.4	 16
 66	  4	119.0	17.3	 16
 67	  4	193.0	21.6	 16
 68	  4	99.0	12.4	 16
 69	  4	114.8	18.5	 16
 70	  4	167.0	16.8	 16
 71	  4	126.0	18.9	 16
 72	  4	160.3	25.2	 16
 73	  4	349.0	52.0	 16
 74	  4	143.8	20.4	 16
 75	  4	115.0	17.0	 16
 76	  4	85.3	15.7	 16
 77	  4	115.3	22.2	 16
 78	  4	127.0	14.4	 16
 79	  4	99.0	10.9	 16
 80	  4	103.5	15.1	 16
 81	  4	102.3	20.6	 16
 82	  4	110.3	40.1	 16
 83	  4	282.5	24.9	 16
 84	  4	227.8	21.3	 16
 85	  4	116.3	13.0	 16
 86	  4	110.0	14.6	 16
 87	  4	278.0	30.5	 16
 88	  4	739.0	80.3	 16
 89	  4	319.3	41.1	 16
 90	  4	198.8	27.8	 16
 91	  4	238.8	28.6	 16
 92	  4	229.3	30.1	 16
 93	  4	216.8	18.1	 16
 94	  4	230.3	24.4	 16
 95	  4	211.0	18.4	 16
 96	  4	138.5	20.6	 16
 97	  4	316.0	27.3	 16
 98	  4	148.0	28.1	 16
 99	  4	104.0	16.4	 16
100	  4	182.3	22.6	 16
101	  4	348.5	39.5	 16
102	  4	101.8	16.4	 16
103	  4	150.5	16.4	 16
104	  4	166.5	16.4	 16
105	  4	128.8	19.9	 16
106	  4	104.8	17.1	 16
107	  4	217.8	30.0	 16
108	  4	94.3	15.7	 16
109	  4	143.0	17.5	 16
110	  4	96.3	14.0	 16
111	  4	115.3	15.4	 16
112	  4	199.5	21.8	 16
113	  4	165.0	24.3	 16
114	  4	142.3	25.1	 16
115	  4	113.5	17.6	 16
116	  4	105.0	17.0	 16
117	  4	140.0	17.2	 16
118	  4	101.3	16.2	 16
119	  4	195.0	24.7	 16
120	  4	214.5	23.5	 16
121	  4	167.5	24.3	 16
122	  4	124.0	14.1	 16
123	  4	87.8	14.1	 16
124	  4	79.3	8.8	 16
125	  4	93.0	13.7	 16
126	  4	108.0	22.2	 16
127	  4	95.3	14.5	 16
128	  4	86.8	11.3	 16
129	  4	84.3	14.6	 16
130	  4	113.8	21.1	 16
131	  4	638.8	62.0	 16
132	  4	315.0	23.8	 16
133	  4	102.0	13.3	 16
134	  4	213.5	27.9	 16
135	  4	157.8	20.9	 16
136	  4	301.8	30.6	 16
137	  4	115.8	31.7	 16
138	  4	138.8	25.6	 16
139	  4	272.3	35.7	 16
140	  4	101.0	14.1	 16
141	  4	84.8	12.1	 16
142	  4	394.0	38.9	 16
143	  4	263.0	29.1	 16
144	  4	77.5	12.9	 16
145	  4	82.5	13.7	 16
146	  4	1139.0	152.1	 16
147	  4	157.8	28.9	 16
148	  4	124.8	19.8	 16
149	  4	95.3	11.8	 16
150	  4	109.5	16.3	 16
151	  4	141.8	24.8	 16
152	  4	131.3	16.1	 16
153	  4	135.5	17.5	 16
154	  4	84.5	11.0	 16
155	  4	105.5	12.6	 16
156	  4	75.5	13.8	 16
157	  4	84.5	8.6	 16
158	  4	91.3	17.3	 16
159	  4	106.5	17.0	 16
160	  4	282.3	36.7	 16
161	  4	349.0	39.0	 16
162	  4	451.3	120.9	 16
163	  4	88.0	16.2	 16
164	  4	164.3	15.7	 16
165	  4	195.5	25.7	 16
166	  4	97.5	16.9	 16
167	  4	150.8	28.2	 16
168	  4	96.3	16.3	 16
169	  4	79.5	12.9	 16
170	  4	125.3	23.7	 16
171	  4	70.3	12.3	 16
172	  4	87.5	8.8	 16
173	  4	74.5	10.1	 20
174	  4	82.5	13.2	 16
175	  4	73.3	14.0	 16
176	  4	127.3	16.5	 16
177	  4	71.0	10.4	 16
178	  4	69.0	12.5	 16
179	  4	248.0	45.0	 16
180	  4	266.3	42.4	 16
181	  4	74.3	8.1	 16
182	  4	90.5	17.1	 16
183	  4	153.0	28.0	 16
184	  4	102.0	19.3	 16
185	  4	98.0	9.0	 16
186	  4	81.0	13.8	 16
187	  4	72.8	12.9	 16
188	  4	69.3	10.3	 16
189	  4	70.0	12.9	 16
190	  4	111.3	24.6	 16
191	  4	166.0	23.1	 16
192	  4	141.5	25.4	 16
193	  4	98.3	14.8	 16
194	  4	126.8	14.1	 16
195	  4	123.3	21.7	 16
196	  4	163.0	25.1	 16
197	  4	235.0	28.7	 16
198	  4	161.0	19.1	 16
199	  4	238.5	34.9	 16
200	  4	136.0	24.6	 16
201	  4	98.5	27.5	 16
202	  4	139.0	22.3	 16
203	  4	92.5	15.2	 16
204	  4	89.5	12.3	 16
205	  4	114.0	18.6	 16
206	  4	128.3	13.7	 16
207	  4	116.0	22.2	 16
208	  4	80.8	13.2	 16
209	  4	118.0	15.9	 16
210	  4	106.5	15.9	 16
211	  4	66.3	7.8	 16
212	  4	79.0	12.4	 16
213	  4	110.8	30.2	 16
214	  4	89.5	26.8	 16
215	  4	102.5	19.3	 16
216	  4	90.5	16.3	 16
217	  4	221.0	27.8	 16
218	  4	161.3	28.2	 16
219	  4	118.3	17.9	 16
220	  4	88.3	16.2	 16
221	  4	91.8	15.1	 16
222	  4	96.0	13.8	 16
223	  4	89.0	18.8	 16
224	  4	87.5	18.9	 16
225	  4	75.8	12.9	 16
226	  4	111.0	20.7	 16
227	  4	98.0	16.2	 16
228	  4	104.3	19.3	 16
229	  4	81.3	9.3	 16
230	  4	77.8	13.5	 16
231	  4	89.3	15.2	 16
232	  4	74.5	13.2	 16
233	  4	69.0	14.9	 16
234	  4	69.3	11.5	 16
235	  4	58.0	9.7	 16
236	  4	53.3	9.3	 16
237	  4	55.5	12.9	 16
238	  4	55.5	11.2	 16
239	  4	61.0	13.3	 16
240	  4	141.0	22.4	 16
241	  4	132.8	23.2	 16
242	  4	107.5	20.2	 16
243	  4	422.5	45.6	 16
244	  4	122.0	13.5	 16
245	  4	109.3	15.4	 16
246	  4	208.8	36.7	 16
247	  4	185.3	30.9	 16
248	  4	77.3	15.1	 16
249	  4	88.5	16.6	 16
250	  4	85.0	11.6	 16
251	  4	96.0	15.4	 16
252	  4	100.8	19.1	 16
253	  4	58.8	9.3	 16
254	  4	87.5	17.1	 16
255	  4	94.0	13.8	 16
256	  4	85.5	14.6	 16
257	  4	78.3	10.8	 16
258	  4	120.3	19.9	 16
259	  4	71.3	11.9	 16
260	  4	66.0	12.2	 16
261	  4	70.0	19.4	 16
262	  4	75.0	12.3	 16
263	  4	97.8	18.7	 16
264	  4	219.3	31.3	 16
265	  4	88.8	11.8	 16
266	  4	153.5	18.7	 16
267	  4	101.5	15.9	 16
268	  4	79.3	8.9	 16
269	  4	93.0	16.7	 16
270	  4	120.3	22.0	 16
271	  4	77.8	14.2	 16
272	  4	218.5	18.9	 16
273	  4	928.5	77.2	 16
274	  4	403.0	48.5	 16
275	  4	232.5	32.3	 16
276	  4	125.3	21.3	 16
277	  4	152.8	20.2	 16
278	  4	147.8	26.1	 16
279	  4	101.3	18.2	 16
280	  4	107.3	15.6	 16
281	  4	83.3	15.8	 16
282	  4	83.0	15.3	 16
283	  4	163.3	26.2	 16
284	  4	97.0	11.3	 16
285	  4	163.0	23.0	 16
286	  4	134.3	12.6	 16
287	  4	142.8	19.9	 16
288	  4	116.3	20.9	 16
289	  4	96.3	11.6	 16
290	  4	125.0	13.1	 16
291	  4	76.8	18.1	 16
292	  4	138.5	26.8	 16
293	  4	201.0	23.3	 16
294	  4	118.5	12.0	 16
295	  4	87.5	14.3	 16
296	  4	75.5	13.9	 16
297	  4	142.8	18.8	 16
298	  4	126.3	29.8	 16
299	  4	136.5	16.6	 16
300	  4	110.3	15.4	 16
301	  4	108.3	13.1	 16
302	  4	87.0	14.4	 16
303	  4	113.3	14.4	 16
304	  4	153.3	15.2	 16
305	  4	77.3	11.0	 16
306	  4	70.0	9.2	 16
307	  4	106.5	17.0	 16
308	  4	87.0	17.2	 16
309	  4	305.3	65.2	 16
310	  4	363.3	38.6	 16
311	  4	163.0	20.3	 16
312	  4	237.5	31.5	 16
313	  4	286.0	27.6	 16
314	  4	180.5	29.8	 16
315	  4	83.3	13.9	 16
316	  4	162.0	25.4	 16
317	  4	88.5	14.3	 16
318	  4	78.0	12.3	 16
319	  4	82.0	16.2	 16
320	  4	128.3	26.9	 16
321	  4	158.5	29.6	 16
322	  4	103.0	15.7	 16
323	  4	89.3	12.6	 16
324	  4	117.3	14.4	 16
325	  4	179.3	21.5	 16
326	  4	131.3	23.4	 16
327	  4	83.3	17.7	 16
328	  4	214.3	27.8	 16
329	  4	309.3	24.7	 16
330	  4	83.3	17.6	 16
331	  4	84.3	10.5	 16
332	  4	73.3	15.2	 16
333	  4	72.5	12.1	 16
334	  4	71.5	10.2	 16
335	  4	76.3	11.4	 16
336	  4	72.8	13.6	 16
337	  4	81.5	10.7	 16
338	  4	80.3	11.6	 16
339	  4	72.0	10.6	 16
340	  4	90.0	18.2	 16
341	  4	355.8	60.7	 16
342	  4	96.5	15.9	 16
343	  4	139.3	20.9	 16
344	  4	129.0	15.6	 16
345	  4	174.0	22.0	 16
346	  4	108.5	18.4	 16
347	  4	94.5	15.0	 16
348	  4	310.0	61.2	 16
349	  4	153.5	29.8	 16
350	  4	83.8	13.2	 16
351	  4	92.3	16.7	 20
352	  4	110.5	22.3	 16
353	  4	82.8	17.2	 16
354	  4	88.3	12.2	 16
355	  4	110.3	19.4	 16
356	  4	88.3	12.5	 16
357	  4	147.8	22.9	 16
358	  4	68.8	11.6	 16
359	  4	70.3	8.3	 16
360	  4	81.3	9.4	 16
361	  4	251.0	37.7	 16
362	  4	294.5	38.0	 16
363	  4	305.3	60.7	 16
364	  4	173.8	27.5	 16
365	  4	365.8	52.9	 16
366	  4	91.3	10.2	 16
367	  4	103.5	20.1	 16
368	  4	74.3	10.0	 16
369	  4	128.0	20.1	 16
370	  4	109.5	17.6	 16
371	  4	218.8	22.9	 16
372	  4	140.3	22.0	 16
373	  4	204.8	38.9	 16
374	  4	83.3	11.5	 16
375	  4	92.5	12.2	 16
376	  4	123.5	18.4	 16
377	  4	102.0	15.3	 16
378	  4	116.5	21.6	 16
379	  4	106.8	8.7	 16
380	  4	250.5	39.6	 16
381	  4	1171.8	158.3	 16
382	  4	480.8	46.8	 16
383	  4	328.8	44.4	 16
384	  4	95.3	12.0	 16
385	  4	79.0	11.8	 16
386	  4	74.0	12.7	 16
387	  4	186.5	22.6	 16
388	  4	79.0	21.6	 16
389	  4	132.3	18.4	 16
390	  4	83.3	13.3	 16
391	  4	68.5	10.0	 16
392	  4	99.5	12.7	 16
393	  4	83.8	16.2	 16
394	  4	131.0	15.8	 16
395	  4	193.8	24.9	 16
396	  4	205.5	34.7	 16
397	  4	88.5	14.5	 16
398	  4	85.0	12.0	 16
399	  4	88.8	15.4	 16
400	  4	172.0	28.9	 16
401	  4	124.8	22.1	 16
402	  4	100.3	21.1	 16
403	  4	69.5	11.5	 16
404	  4	79.0	11.9	 16
405	  4	164.5	25.1	 16
406	  4	114.3	8.7	 16
407	  4	179.8	19.0	 16
408	  4	96.0	14.6	 16
409	  4	119.5	9.2	 16
410	  4	124.0	17.8	 16
411	  4	274.0	25.0	 16
412	  4	379.8	37.3	 16
413	  4	759.8	62.2	 16
414	  4	96.0	13.1	 16
415	  4	114.3	15.8	 16
416	  4	82.0	13.2	 16
417	  4	92.0	12.0	 16
418	  4	108.3	19.0	 16
419	  4	246.0	25.0	 16
420	  4	75.0	11.9	 16
421	  4	97.5	9.3	 16
422	  4	186.3	33.6	 16
423	  4	173.3	19.1	 16
424	  4	111.0	12.3	 16
425	  4	237.3	32.9	 16
426	  4	76.5	16.0	 16
427	  4	85.0	11.8	 16
428	  4	72.0	8.5	 16
429	  4	229.3	39.1	 16
430	  4	241.8	31.2	 16
431	  4	124.5	20.4	 16
432	  4	78.8	15.0	 16
433	  4	113.5	20.6	 16
434	  4	127.5	12.3	 16
435	  4	76.5	12.7	 16
436	  4	73.3	13.7	 16
437	  4	70.0	14.3	 16
438	  4	94.0	14.6	 16
439	  4	113.3	23.5	 16
440	  4	105.0	14.2	 16
441	  4	102.3	16.2	 16
442	  4	103.0	20.1	 16
443	  4	437.5	36.7	 16
444	  4	132.0	29.5	 16
445	  4	89.5	17.3	 16
446	  4	74.5	8.1	 16
447	  4	64.3	11.2	 16
448	  4	101.3	13.5	 16
449	  4	109.5	19.2	 16
450	  4	117.3	12.2	 16
451	  4	65.0	14.1	 16
452	  4	90.0	14.7	 16
453	  4	296.5	39.9	 16
454	  4	533.8	77.3	 16
455	  4	194.5	22.6	 16
456	  4	230.8	25.2	 16
457	  4	101.3	13.1	 16
458	  4	75.0	8.0	 16
459	  4	98.5	16.8	 16
460	  4	417.3	40.4	 16
461	  4	1454.3	106.5	 16
462	  4	86.5	16.8	 16
463	  4	67.3	13.3	 16
464	  4	348.8	50.7	 16
465	  4	309.3	22.8	 16
466	  4	352.3	28.7	 16
467	  4	340.5	45.4	 16
468	  4	127.3	15.3	 16
469	  4	71.5	7.9	 16
470	  4	423.8	51.9	 16
471	  4	80.5	15.5	 16
472	  4	60.5	16.1	 16
473	  4	56.0	10.7	 16
474	  4	58.3	10.3	 16
475	  4	57.8	8.4	 16
476	  4	54.3	9.9	 16
477	  4	124.0	17.7	 16
478	  4	84.8	14.2	 16
479	  4	135.8	24.6	 16
480	  4	68.3	7.7	 16
481	  4	75.3	9.7	 16
482	  4	94.5	16.4	 16
483	  4	107.8	19.9	 16
484	  4	79.0	16.8	 16
485	  4	147.0	14.0	 16
486	  4	78.3	15.2	 16
487	  4	86.0	13.7	 16
488	  4	147.5	24.1	 16
489	  4	80.3	18.1	 16
490	  4	71.3	10.4	 16
491	  4	69.5	12.4	 16
492	  4	83.8	11.1	 16
493	  4	107.0	13.8	 16
494	  4	82.0	10.0	 16
495	  4	302.5	23.6	 16
496	  4	116.5	35.3	 16
497	  4	490.5	46.3	 16
498	  4	99.3	21.7	 16
499	  4	87.5	12.9	 16
500	  4	109.5	14.8	 16
501	  4	192.5	16.5	 16
502	  4	178.8	23.7	 16
503	  4	72.5	11.6	 16
504	  4	69.3	9.0	 16
505	  4	810.5	142.7	 16
506	  4	109.0	17.6	 16
507	  4	127.8	27.5	 16
508	  4	103.0	13.9	 16
509	  4	132.0	19.5	 16
510	  4	259.3	25.0	 16
511	  4	190.0	26.2	 16
512	  4	248.8	27.7	 16
513	  4	69.0	13.5	 16
514	  4	73.5	15.9	 16
515	  4	74.8	14.0	 16
516	  4	109.5	21.0	 16
517	  4	100.3	12.4	 16
518	  4	89.5	13.1	 16
519	  4	93.5	12.2	 16
520	  4	79.3	14.6	 16
521	  4	80.3	13.2	 16
522	  4	208.3	39.4	 16
523	  4	194.0	37.6	 16
524	  4	96.5	14.1	 16
525	  4	73.3	10.6	 16
526	  4	81.3	9.9	 16
527	  4	89.0	19.0	 16
528	  4	106.5	20.9	 16
529	  4	90.5	14.2	 20
530	  4	70.5	8.2	 16
531	  4	69.5	9.9	 16
532	  4	104.0	15.3	 16
533	  4	75.8	13.3	 16
534	  4	107.3	18.8	 16
535	  4	197.0	15.7	 16
536	  4	138.3	15.1	 16
537	  4	123.3	23.5	 16
538	  4	92.3	13.1	 16
539	  4	113.5	19.0	 16
540	  4	67.3	12.2	 16
541	  4	86.5	10.8	 16
542	  4	96.8	14.4	 16
543	  4	280.5	33.6	 16
544	  4	176.8	19.5	 16
545	  4	105.3	16.0	 16
546	  4	84.3	14.4	 16
547	  4	126.0	16.2	 16
548	  4	216.3	20.1	 16
549	  4	101.3	13.9	 16
550	  4	82.5	10.3	 16
551	  4	83.8	16.1	 16
552	  4	95.0	12.3	 16
553	  4	75.3	10.3	 16
554	  4	295.3	112.6	 16
555	  4	75.5	15.4	 16
556	  4	90.3	15.5	 16
557	  4	67.5	9.5	 16
558	  4	84.0	14.6	 16
559	  4	234.0	26.3	 16
560	  4	346.3	40.9	 16
561	  4	632.0	47.5	 16
562	  4	309.3	26.3	 16
563	  4	93.8	11.7	 16
564	  4	181.0	25.6	 16
565	  4	170.8	23.1	 16
566	  4	278.5	35.2	 16
567	  4	70.8	14.1	 16
568	  4	94.8	11.9	 16
569	  4	82.5	24.1	 16
570	  4	86.8	18.9	 16
571	  4	69.3	11.3	 16
572	  4	117.0	20.3	 16
573	  4	84.5	12.4	 16
574	  4	90.8	16.2	 16
575	  4	164.3	27.7	 16
576	  4	110.3	15.3	 16
577	  4	142.8	25.7	 16
578	  4	89.0	25.6	 16
579	  4	117.3	13.3	 16
580	  4	131.3	19.2	 16
581	  4	134.5	23.6	 16
582	  4	136.0	16.2	 16
583	  4	133.8	22.6	 16
584	  4	179.8	21.7	 16
585	  4	174.3	20.6	 16
586	  4	115.0	16.1	 16
587	  4	96.8	14.1	 16
588	  4	135.0	28.0	 16
589	  4	146.8	16.4	 16
590	  4	106.8	24.0	 16
591	  4	101.5	20.6	 16
592	  4	124.5	15.2	 16
593	  4	94.8	14.2	 16
594	  4	85.5	12.3	 16
595	  4	94.0	17.3	 16
596	  4	91.3	13.7	 16
597	  4	101.3	14.7	 16
598	  4	79.8	15.8	 16
599	  4	94.0	11.6	 16
600	  4	185.0	31.6	 16
601	  4	211.0	35.2	 16
602	  4	230.0	23.3	 16
603	  4	380.8	34.6	 16
604	  4	121.0	18.8	 16
605	  4	187.3	21.9	 16
606	  4	98.3	20.2	 16
607	  4	78.5	13.1	 16
608	  4	128.3	20.8	 16
609	  4	132.5	16.6	 16
610	  4	164.5	24.2	 16
611	  4	120.3	15.4	 16
612	  4	75.5	11.0	 16
613	  4	78.5	13.7	 16
614	  4	101.0	12.8	 16
615	  4	82.3	12.6	 16
616	  4	97.3	28.0	 16
617	  4	104.0	13.8	 16
618	  4	79.3	10.8	 16
619	  4	69.0	13.1	 16
620	  4	217.5	37.5	 16
621	  4	76.3	13.6	 16
622	  4	70.0	9.0	 16
623	  4	75.5	13.0	 16
624	  4	81.5	16.6	 16
625	  4	172.3	47.5	 16
626	  4	82.5	11.5	 16
627	  4	160.0	31.6	 16
628	  4	162.5	20.2	 16
629	  4	218.5	14.3	 16
630	  4	87.3	10.9	 16
631	  4	104.8	18.5	 16
632	  4	88.3	12.6	 16
633	  4	110.3	14.9	 16
634	  4	99.8	12.1	 16
635	  4	102.3	22.6	 16
636	  4	143.3	65.3	 16
637	  4	141.5	19.0	 16
638	  4	87.3	12.8	 16
639	  4	96.3	10.0	 16
640	  4	101.0	15.0	 16
641	  4	86.0	11.4	 16
642	  4	78.3	16.6	 16
643	  4	95.0	14.7	 16
644	  4	143.3	22.1	 16
645	  4	142.8	23.3	 16
646	  4	145.5	26.8	 16
647	  4	65.0	7.4	 16
648	  4	99.0	16.9	 16
649	  4	74.3	15.0	 16
650	  4	66.0	14.2	 16
651	  4	89.5	15.8	 16
652	  4	70.5	12.5	 16
653	  4	74.0	21.7	 16
654	  4	64.8	16.2	 16
655	  4	77.0	12.1	 16
656	  4	75.5	14.8	 16
657	  4	82.8	16.8	 16
658	  4	62.3	6.7	 16
659	  4	78.3	23.5	 16
660	  4	75.8	9.7	 16
661	  4	171.8	15.1	 16
662	  4	120.8	16.2	 16
663	  4	216.3	33.8	 16
664	  4	91.3	11.5	 16
665	  4	101.0	15.6	 16
666	  4	292.5	44.4	 16
667	  4	73.0	14.4	 16
668	  4	94.0	17.8	 16
669	  4	81.0	15.2	 16
670	  4	93.3	14.1	 16
671	  4	134.5	17.4	 16
672	  4	106.5	15.8	 16
673	  4	259.3	29.2	 16
674	  4	223.8	37.8	 16
675	  4	270.5	37.4	 16
676	  4	93.8	17.9	 16
677	  4	120.5	17.8	 16
678	  4	70.5	11.4	 16
679	  4	74.8	10.2	 16
680	  4	178.3	19.3	 16
681	  4	73.5	11.9	 16
682	  4	72.8	13.1	 16
683	  4	68.8	10.1	 16
684	  4	68.3	13.4	 16
685	  4	86.8	14.6	 16
686	  4	111.8	23.8	 16
687	  4	91.5	14.8	 16
688	  4	71.8	10.8	 16
689	  4	67.0	13.9	 16
690	  4	673.0	131.2	 16
691	  4	119.0	21.4	 16
692	  4	309.3	54.7	 16
693	  4	93.3	11.8	 16
694	  4	116.0	17.8	 16
695	  4	136.3	19.9	 16
696	  4	132.5	18.7	 16
697	  4	65.0	13.0	 16
698	  4	65.5	12.9	 16
699	  4	90.8	15.1	 16
700	  4	107.8	22.3	 16
701	  4	102.8	20.9	 16
702	  4	130.0	24.6	 16
703	  4	178.0	26.9	 16
704	  4	197.0	20.0	 16
705	  4	225.3	32.3	 16
706	  4	118.5	41.7	 16
707	  4	61.0	12.7	 20
708	  4	53.3	8.7	 16
709	  4	53.0	8.4	 16
710	  4	51.0	8.0	 16
711	  4	77.0	16.0	 16
  0	  5	126.0	14.3	 16
  1	  5	80.3	10.8	 16
  2	  5	85.8	14.4	 16
  3	  5	127.3	24.5	 16
  4	  5	76.3	11.3	 16
  5	  5	206.0	32.6	 16
  6	  5	657.3	82.7	 16
  7	  5	160.0	18.7	 16
  8	  5	89.3	16.6	 16
  9	  5	176.5	17.2	 16
 10	  5	149.5	21.4	 16
 11	  5	73.3	11.4	 16
 12	  5	112.8	16.8	 16
 13	  5	7129.3	1297.1	 16
 14	  5	7264.3	691.9	 20
 15	  5	7129.5	1310.8	 16
 16	  5	136.3	20.1	 16
 17	  5	89.5	15.7	 16
 18	  5	124.0	13.1	 16
 19	  5	116.0	14.5	 16
 20	  5	127.8	14.8	 16
 21	  5	121.3	21.9	 16
 22	  5	122.3	19.3	 16
 23	  5	72.0	11.6	 16
 24	  5	144.0	26.1	 16
 25	  5	119.5	16.0	 16
 26	  5	116.3	13.6	 16
 27	  5	126.3	17.8	 16
 28	  5	125.5	20.5	 16
 29	  5	83.0	14.7	 16
 30	  5	135.5	18.9	 16
 31	  5	135.8	24.8	 16
 32	  5	142.3	23.1	 16
 33	  5	136.5	16.1	 16
 34	  5	127.5	16.7	 16
 35	  5	91.8	11.2	 16
 36	  5	145.3	28.3	 16
 37	  5	7363.8	1313.2	 16
 38	  5	7324.3	1223.5	 16
 39	  5	7283.8	1804.9	 16
 40	  5	140.3	23.9	 16
 41	  5	94.5	21.2	 16
 42	  5	7813.3	1721.7	 16
 43	  5	152.3	28.7	 16
 44	  5	137.8	19.5	 16
 45	  5	125.0	16.7	 16
 46	  5	118.3	20.6	 16
 47	  5	82.3	15.7	 16
 48	  5	133.8	22.6	 16
 49	  5	129.3	17.0	 16
 50	  5	121.3	13.5	 16
 51	  5	121.5	18.1	 16
 52	  5	123.8	17.1	 16
 53	  5	83.0	17.3	 16
 54	  5	120.8	18.0	 16
 55	  5	113.3	15.2	 16
 56	  5	117.3	12.0	 16
 57	  5	110.8	15.3	 16
 58	  5	117.8	19.6	 16
 59	  5	74.0	11.4	 16
 60	  5	75.8	15.0	 16
 61	  5	91.8	17.5	 16
 62	  5	7337.8	1710.4	 16
 63	  5	145.5	19.3	 16
 64	  5	131.3	23.0	 16
 65	  5	141.0	18.8	 16
 66	  5	6198.0	1121.4	 16
 67	  5	93.3	15.2	 16
 68	  5	128.8	12.4	 16
 69	  5	6674.0	720.9	 16
 70	  5	6719.5	884.9	 16
 71	  5	6350.8	1402.6	 16
 72	  5	130.5	18.0	 16
 73	  5	89.5	17.1	 16
 74	  5	140.5	19.8	 16
 75	  5	126.8	22.6	 16
 76	  5	110.3	13.7	 16
 77	  5	120.5	18.6	 16
 78	  5	116.3	14.0	 16
 79	  5	88.5	11.0	 16
 80	  5	6975.3	928.2	 16
 81	  5	137.3	18.7	 16
 82	  5	178.8	128.6	 16
 83	  5	129.3	13.7	 16
 84	  5	6555.3	772.5	 16
 85	  5	102.0	15.1	 16
 86	  5	137.5	26.8	 16
 87	  5	141.0	28.9	 16
 88	  5	6803.0	744.4	 16
 89	  5	138.0	28.9	 16
 90	  5	125.3	12.4	 16
 91	  5	89.8	17.9	 16
 92	  5	119.3	18.0	 16
 93	  5	6016.5	648.7	 16
 94	  5	6026.0	863.5	 16
 95	  5	151.3	16.3	 16
 96	  5	126.5	14.0	 16
 97	  5	75.8	13.5	 16
 98	  5	139.3	15.3	 16
 99	  5	6673.0	773.0	 16
100	  5	6673.3	837.1	 16
101	  5	131.5	15.5	 16
102	  5	108.3	19.3	 16
103	  5	80.0	9.2	 16
104	  5	134.5	18.7	 16
105	  5	128.0	18.4	 16
106	  5	5827.8	843.1	 16
107	  5	126.8	18.0	 16
108	  5	132.5	19.8	 16
109	  5	67.0	12.2	 16
110	  5	70.0	12.5	 16
111	  5	128.0	17.1	 16
112	  5	204.3	31.5	 16
113	  5	95.8	16.3	 16
114	  5	89.3	13.0	 16
115	  5	155.8	20.3	 16
116	  5	106.8	20.8	 16
117	  5	145.3	20.4	 16
118	  5	4676.0	356.6	 16
119	  5	180.5	26.0	 16
120	  5	94.0	15.5	 16
121	  5	103.3	10.9	 16
122	  5	68.5	8.9	 16
123	  5	78.0	10.4	 16
124	  5	80.8	12.9	 16
125	  5	86.0	10.0	 16
126	  5	330.0	35.7	 16
127	  5	92.3	11.7	 16
128	  5	592.3	72.0	 16
129	  5	226.5	29.4	 16
130	  5	143.5	23.8	 16
131	  5	376.5	36.3	 16
132	  5	76.0	13.0	 16
133	  5	260.0	22.8	 16
134	  5	195.5	23.3	 16
135	  5	144.0	26.7	 16
136	  5	80.8	13.9	 16
137	  5	76.3	12.3	 16
138	  5	76.5	12.8	 16
139	  5	357.5	46.2	 16
140	  5	79.8	16.8	 16
141	  5	255.5	43.4	 16
142	  5	82.5	11.4	 16
143	  5	630.3	95.6	 16
144	  5	145.0	26.5	 16
145	  5	104.3	15.1	 16
146	  5	125.0	16.1	 16
147	  5	632.0	81.7	 16
148	  5	92.8	12.8	 16
149	  5	99.3	14.9	 16
150	  5	206.8	34.0	 16
151	  5	134.3	21.5	 16
152	  5	286.0	41.4	 16
153	  5	161.3	54.1	 16
154	  5	263.0	38.6	 16
155	  5	86.5	12.8	 16
156	  5	138.5	19.2	 16
157	  5	210.5	26.5	 16
158	  5	149.0	15.1	 16
159	  5	266.8	30.5	 16
160	  5	154.3	14.6	 16
161	  5	150.3	24.1	 16
162	  5	138.3	17.9	 16
163	  5	134.5	21.5	 16
164	  5	172.5	29.5	 16
165	  5	548.5	87.9	 16
166	  5	238.8	36.5	 16
167	  5	113.3	18.6	 16
168	  5	95.5	14.1	 16
169	  5	388.3	65.8	 16
170	  5	137.0	18.2	 16
171	  5	124.5	16.2	 16
172	  5	237.0	33.7	 16
173	  5	87.5	15.5	 16
174	  5	478.8	63.4	 16
175	  5	150.8	30.4	 16
176	  5	79.5	11.6	 16
177	  5	73.3	12.1	 16
178	  5	71.8	14.5	 16
179	  5	98.3	18.8	 16
180	  5	485.0	65.1	 16
181	  5	663.8	106.9	 16
182	  5	212.3	21.1	 16
183	  5	97.3	11.4	 16
184	  5	69.3	10.8	 16
185	  5	240.0	29.9	 16
186	  5	178.8	23.6	 16
187	  5	81.3	12.6	 16
188	  5	114.5	16.9	 16
189	  5	97.5	19.3	 16
190	  5	88.5	10.6	 16
191	  5	84.8	18.9	 16
192	  5	168.8	20.1	 20
193	  5	248.3	40.9	 16
194	  5	154.8	21.7	 16
195	  5	170.3	31.1	 16
196	  5	157.5	20.5	 16
197	  5	214.0	26.1	 16
198	  5	152.0	15.1	 16
199	  5	94.0	15.0	 16
200	  5	197.0	27.4	 16
201	  5	109.3	13.7	 16
202	  5	108.5	21.7	 16
203	  5	100.0	14.7	 16
204	  5	80.5	13.3	 16
205	  5	73.3	10.8	 16
206	  5	374.8	67.5	 16
207	  5	71.0	7.4	 16
208	  5	91.3	15.4	 16
209	  5	157.8	26.8	 16
210	  5	201.8	30.0	 16
211	  5	89.3	8.0	 16
212	  5	104.0	14.0	 16
213	  5	270.3	40.3	 16
214	  5	401.0	58.7	 16
215	  5	116.0	21.8	 16
216	  5	140.3	20.2	 16
217	  5	583.8	117.2	 16
218	  5	82.0	15.2	 16
219	  5	72.5	15.5	 16
220	  5	72.5	10.3	 16
221	  5	273.5	58.2	 16
222	  5	81.0	9.0	 16
223	  5	98.5	12.6	 16
224	  5	129.8	25.5	 16
225	  5	73.3	14.2	 16
226	  5	113.5	20.8	 16
227	  5	156.3	29.7	 16
228	  5	116.5	15.0	 16
229	  5	367.3	50.7	 16
230	  5	109.3	26.0	 16
231	  5	162.5	27.6	 16
232	  5	68.8	8.5	 16
233	  5	113.0	13.0	 16
234	  5	85.5	13.9	 16
235	  5	234.3	25.1	 16
236	  5	82.8	12.8	 16
237	  5	90.0	9.3	 16
238	  5	140.0	19.7	 16
239	  5	334.3	41.1	 16
240	  5	87.3	13.2	 16
241	  5	86.8	14.0	 16
242	  5	103.5	16.3	 16
243	  5	205.5	24.9	 16
244	  5	113.5	17.9	 16
245	  5	293.5	33.5	 16
246	  5	326.3	47.7	 16
247	  5	113.0	11.2	 16
248	  5	199.5	30.2	 16
249	  5	125.3	16.0	 16
250	  5	96.8	17.8	 16
251	  5	1238.3	146.4	 16
252	  5	71.3	15.2	 16
253	  5	64.5	10.6	 16
254	  5	75.8	14.1	 16
255	  5	328.0	55.7	 16
256	  5	1269.3	93.6	 16
257	  5	103.3	12.4	 16
258	  5	115.3	18.2	 16
259	  5	73.0	14.7	 16
260	  5	82.8	18.5	 16
261	  5	72.3	11.2	 16
262	  5	259.5	27.7	 16
263	  5	80.8	13.4	 16
264	  5	87.3	13.9	 16
265	  5	100.8	21.5	 16
266	  5	76.5	11.3	 16
267	  5	100.3	14.8	 16
268	  5	88.8	17.7	 16
269	  5	94.8	18.3	 16
270	  5	88.3	14.1	 16
271	  5	661.0	106.3	 16
272	  5	289.3	30.0	 16
273	  5	107.0	16.7	 16
274	  5	91.3	13.0	 16
275	  5	77.3	13.4	 16
276	  5	75.3	11.2	 16
277	  5	80.3	14.4	 16
278	  5	279.5	46.1	 16
279	  5	115.8	16.9	 16
280	  5	142.0	24.1	 16
281	  5	1075.3	67.6	 16
282	  5	1098.0	53.9	 16
283	  5	287.8	35.6	 16
284	  5	171.5	29.9	 16
285	  5	461.0	58.5	 16
286	  5	70.5	7.4	 16
287	  5	130.5	22.9	 16
288	  5	202.0	30.0	 16
289	  5	157.5	22.6	 16
290	  5	2216.3	151.5	 16
291	  5	193.3	25.5	 16
292	  5	197.5	20.4	 16
293	  5	145.8	19.3	 16
294	  5	559.0	59.1	 16
295	  5	267.0	33.3	 16
296	  5	171.0	32.8	 16
297	  5	121.5	14.8	 16
298	  5	126.0	16.2	 16
299	  5	95.3	13.1	 16
300	  5	2013.3	260.6	 16
301	  5	157.8	18.8	 16
302	  5	349.0	36.7	 16
303	  5	647.5	112.7	 16
304	  5	89.5	12.6	 16
305	  5	96.0	15.8	 16
306	  5	521.3	67.0	 16
307	  5	96.3	16.0	 16
308	  5	317.5	21.5	 16
309	  5	193.8	31.5	 16
310	  5	104.8	19.5	 16
311	  5	220.8	22.9	 16
312	  5	191.3	40.7	 16
313	  5	192.3	23.6	 16
314	  5	189.8	29.4	 16
315	  5	145.5	18.2	 16
316	  5	130.0	13.9	 16
317	  5	140.3	24.1	 16
318	  5	168.5	26.6	 16
319	  5	126.5	46.7	 16
320	  5	68.5	9.6	 16
321	  5	96.3	13.9	 16
322	  5	76.0	11.1	 16
323	  5	94.0	16.0	 16
324	  5	169.0	33.1	 16
325	  5	146.3	22.4	 16
326	  5	234.5	28.4	 16
327	  5	246.3	32.4	 16
328	  5	96.5	19.0	 16
329	  5	368.3	38.9	 16
330	  5	620.8	41.0	 16
331	  5	135.0	15.2	 16
332	  5	132.5	15.3	 16
333	  5	372.8	33.8	 16
334	  5	153.5	18.8	 16
335	  5	90.0	12.8	 16
336	  5	95.3	26.2	 16
337	  5	107.0	12.4	 16
338	  5	101.0	12.5	 16
339	  5	94.3	15.7	 16
340	  5	148.0	13.5	 16
341	  5	380.0	68.7	 16
342	  5	72.5	13.6	 16
343	  5	93.5	14.2	 16
344	  5	92.0	12.7	 16
345	  5	123.0	14.7	 16
346	  5	120.3	23.5	 16
347	  5	2079.5	326.7	 16
348	  5	91.5	12.2	 16
349	  5	196.0	30.4	 16
350	  5	149.3	25.1	 16
351	  5	322.8	32.2	 16
352	  5	356.0	40.3	 16
353	  5	136.5	22.0	 16
354	  5	100.5	13.4	 16
355	  5	1857.5	292.8	 16
356	  5	77.0	9.8	 16
357	  5	173.5	33.1	 16
358	  5	110.0	17.5	 16
359	  5	97.3	16.3	 16
360	  5	119.0	17.1	 16
361	  5	213.3	27.4	 16
362	  5	436.0	59.8	 16
363	  5	83.5	16.1	 16
364	  5	66.3	9.6	 16
365	  5	81.3	10.7	 16
366	  5	80.5	17.8	 16
367	  5	807.3	126.0	 16
368	  5	219.5	32.9	 16
369	  5	274.8	50.6	 16
370	  5	81.0	14.8	 20
371	  5	243.3	20.3	 16
372	  5	311.3	56.1	 16
373	  5	129.8	17.2	 16
374	  5	93.5	15.1	 16
375	  5	81.0	14.3	 16
376	  5	76.0	6.6	 16
377	  5	103.5	12.3	 16
378	  5	155.5	22.2	 16
379	  5	106.3	15.8	 16
380	  5	175.3	27.5	 16
381	  5	113.0	16.0	 16
382	  5	175.3	28.5	 16
383	  5	277.5	35.6	 16
384	  5	93.0	11.9	 16
385	  5	133.0	17.4	 16
386	  5	183.3	24.3	 16
387	  5	278.0	50.0	 16
388	  5	244.3	31.6	 16
389	  5	682.3	102.0	 16
390	  5	135.3	17.3	 16
391	  5	92.0	9.1	 16
392	  5	481.3	41.7	 16
393	  5	118.3	20.7	 16
394	  5	133.0	21.8	 16
395	  5	87.3	18.0	 16
396	  5	79.0	13.7	 16
397	  5	208.5	25.2	 16
398	  5	454.0	52.9	 16
399	  5	252.0	38.0	 16
400	  5	354.5	41.2	 16
401	  5	155.8	33.6	 16
402	  5	135.3	18.4	 16
403	  5	82.8	15.7	 16
404	  5	201.3	29.7	 16
405	  5	77.3	9.1	 16
406	  5	112.5	20.4	 16
407	  5	113.5	15.8	 16
408	  5	167.0	12.6	 16
409	  5	98.5	22.8	 16
410	  5	136.5	17.0	 16
411	  5	155.0	27.5	 16
412	  5	81.0	19.0	 16
413	  5	134.3	10.0	 16
414	  5	168.0	17.7	 16
415	  5	4206.8	339.9	 16
416	  5	4615.8	173.3	 16
417	  5	371.3	42.7	 16
418	  5	146.3	22.9	 16
419	  5	291.8	30.9	 16
420	  5	81.3	9.4	 16
421	  5	103.8	14.2	 16
422	  5	63.3	7.2	 16
423	  5	153.0	21.1	 16
424	  5	107.3	15.1	 16
425	  5	140.8	24.6	 16
426	  5	94.8	17.7	 16
427	  5	95.5	16.1	 16
428	  5	111.3	22.3	 16
429	  5	117.0	11.1	 16
430	  5	98.8	15.7	 16
431	  5	246.3	261.9	 16
432	  5	160.0	22.9	 16
433	  5	263.8	33.6	 16
434	  5	227.8	21.8	 16
435	  5	102.0	15.0	 16
436	  5	74.8	9.8	 16
437	  5	93.0	12.7	 16
438	  5	101.3	15.1	 16
439	  5	124.8	23.2	 16
440	  5	122.3	14.9	 16
441	  5	123.8	17.8	 16
442	  5	175.0	16.8	 16
443	  5	175.3	23.3	 16
444	  5	183.0	19.1	 16
445	  5	128.3	15.2	 16
446	  5	181.5	29.9	 16
447	  5	80.8	12.7	 16
448	  5	274.3	33.8	 16
449	  5	1162.5	149.7	 16
450	  5	628.3	27.8	 16
451	  5	696.0	78.4	 16
452	  5	297.3	26.1	 16
453	  5	267.3	29.9	 16
454	  5	545.0	72.1	 16
455	  5	186.5	30.6	 16
456	  5	76.3	14.2	 16
457	  5	102.3	8.2	 16
458	  5	225.8	17.1	 16
459	  5	99.0	10.4	 16
460	  5	113.3	13.8	 16
461	  5	255.8	29.4	 16
462	  5	105.3	22.1	 16
463	  5	434.3	73.6	 16
464	  5	1516.3	125.8	 16
465	  5	487.5	48.0	 16
466	  5	106.0	20.1	 16
467	  5	110.3	12.9	 16
468	  5	109.0	21.2	 16
469	  5	166.3	38.1	 16
470	  5	116.3	13.3	 16
471	  5	88.5	10.5	 16
472	  5	164.3	27.7	 16
473	  5	149.5	22.1	 16
474	  5	76.5	12.3	 16
475	  5	84.3	14.4	 16
476	  5	187.5	15.7	 16
477	  5	113.0	16.2	 16
478	  5	179.0	24.7	 16
479	  5	175.3	27.1	 16
480	  5	112.5	18.8	 16
481	  5	113.0	13.6	 16
482	  5	190.0	19.4	 16
483	  5	91.3	13.5	 16
484	  5	129.5	15.3	 16
485	  5	299.3	38.3	 16
486	  5	95.8	12.4	 16
487	  5	184.3	32.8	 16
488	  5	117.0	14.9	 16
489	  5	110.3	18.6	 16
490	  5	104.0	16.1	 16
491	  5	241.3	23.9	 16
492	  5	80.3	15.4	 16
493	  5	141.8	17.9	 16
494	  5	102.5	17.7	 16
495	  5	214.3	30.6	 16
496	  5	484.3	71.3	 16
497	  5	135.3	22.1	 16
498	  5	213.3	28.4	 16
499	  5	77.3	10.8	 16
500	  5	101.8	11.4	 16
501	  5	122.5	29.8	 16
502	  5	89.3	10.4	 16
503	  5	377.5	37.0	 16
504	  5	88.5	12.4	 16
505	  5	178.8	25.4	 16
506	  5	71.8	15.0	 16
507	  5	82.0	15.1	 16
508	  5	228.5	30.7	 16
509	  5	2774.5	361.2	 16
510	  5	115.0	19.1	 16
511	  5	348.8	40.4	 16
512	  5	108.3	13.4	 16
513	  5	90.3	16.5	 16
514	  5	109.3	35.2	 16
515	  5	156.3	20.3	 16
516	  5	83.0	9.1	 16
517	  5	243.0	25.2	 16
518	  5	232.5	26.7	 16
519	  5	99.3	16.6	 16
520	  5	87.5	12.8	 16
521	  5	238.0	32.3	 16
522	  5	212.8	33.6	 16
523	  5	139.3	22.3	 16
524	  5	667.8	77.7	 16
525	  5	98.8	23.8	 16
526	  5	193.0	30.0	 16
527	  5	524.8	104.0	 16
528	  5	87.5	14.5	 16
529	  5	889.8	159.0	 16
530	  5	268.3	53.3	 16
531	  5	174.5	26.1	 16
532	  5	114.8	19.3	 16
533	  5	180.3	22.9	 16
534	  5	139.8	16.1	 16
535	  5	179.3	29.3	 16
536	  5	595.3	81.1	 16
537	  5	120.5	22.2	 16
538	  5	3569.3	798.0	 16
539	  5	671.0	111.3	 16
540	  5	82.5	13.7	 16
541	  5	187.3	41.4	 16
542	  5	253.3	45.2	 16
543	  5	100.5	22.0	 16
544	  5	164.8	23.6	 16
545	  5	200.5	33.2	 16
546	  5	193.5	21.9	 16
547	  5	234.3	32.5	 16
548	  5	156.0	22.0	 20
549	  5	149.3	16.7	 16
550	  5	101.8	16.5	 16
551	  5	207.0	22.8	 16
552	  5	71.0	14.1	 16
553	  5	173.8	25.2	 16
554	  5	77.3	13.3	 16
555	  5	131.8	23.8	 16
556	  5	110.0	17.4	 16
557	  5	175.0	24.5	 16
558	  5	85.0	12.9	 16
559	  5	110.0	20.8	 16
560	  5	164.3	20.5	 16
561	  5	229.0	24.1	 16
562	  5	5673.3	726.3	 16
563	  5	94.8	15.2	 16
564	  5	99.5	20.6	 16
565	  5	139.0	17.0	 16
566	  5	462.8	51.4	 16
567	  5	637.5	76.4	 16
568	  5	167.5	23.3	 16
569	  5	329.5	44.7	 16
570	  5	725.8	74.4	 16
571	  5	103.3	17.5	 16
572	  5	186.3	21.4	 16
573	  5	85.8	17.1	 16
574	  5	103.3	18.3	 16
575	  5	182.5	30.3	 16
576	  5	216.8	30.4	 16
577	  5	97.0	19.0	 16
578	  5	155.0	25.2	 16
579	  5	698.0	125.7	 16
580	  5	142.0	15.7	 16
581	  5	353.0	34.3	 16
582	  5	442.8	50.8	 16
583	  5	269.0	26.2	 16
584	  5	116.0	13.6	 16
585	  5	154.8	19.3	 16
586	  5	143.3	19.4	 16
587	  5	132.3	21.1	 16
588	  5	113.8	19.0	 16
589	  5	84.5	16.3	 16
590	  5	79.0	11.0	 16
591	  5	76.0	9.7	 16
592	  5	216.3	29.9	 16
593	  5	212.3	28.6	 16
594	  5	117.5	14.5	 16
595	  5	100.0	9.8	 16
596	  5	127.3	23.0	 16
597	  5	235.3	35.6	 16
598	  5	312.5	50.4	 16
599	  5	68.0	6.5	 16
600	  5	121.3	23.0	 16
601	  5	208.5	29.9	 16
602	  5	756.0	74.3	 16
603	  5	76.3	13.8	 16
604	  5	73.5	14.5	 16
605	  5	72.0	11.4	 16
606	  5	88.3	16.7	 16
607	  5	74.3	13.5	 16
608	  5	78.3	12.1	 16
609	  5	141.5	15.8	 16
610	  5	75.5	15.2	 16
611	  5	67.8	12.3	 16
612	  5	130.3	18.9	 16
613	  5	76.3	14.5	 16
614	  5	123.3	10.2	 16
615	  5	93.3	22.4	 16
616	  5	195.0	21.1	 16
617	  5	256.5	33.1	 16
618	  5	208.3	31.4	 16
619	  5	65.3	12.2	 16
620	  5	66.0	13.3	 16
621	  5	63.5	14.7	 16
622	  5	77.8	11.9	 16
623	  5	165.8	22.0	 16
624	  5	232.8	44.4	 16
625	  5	105.3	18.2	 16
626	  5	406.0	40.5	 16
627	  5	91.3	12.5	 16
628	  5	81.0	13.8	 16
629	  5	206.5	16.1	 16
630	  5	70.0	11.1	 16
631	  5	67.3	14.9	 16
632	  5	178.5	21.0	 16
633	  5	114.0	20.6	 16
634	  5	163.5	27.8	 16
635	  5	93.0	20.2	 16
636	  5	110.0	27.2	 16
637	  5	607.8	83.2	 16
638	  5	356.5	39.6	 16
639	  5	87.3	19.3	 16
640	  5	125.5	27.4	 16
641	  5	75.3	7.9	 16
642	  5	69.0	10.6	 16
643	  5	107.8	16.5	 16
644	  5	146.3	18.7	 16
645	  5	140.3	18.9	 16
646	  5	73.3	13.7	 16
647	  5	63.0	11.7	 16
648	  5	525.3	99.3	 16
649	  5	73.5	13.9	 16
650	  5	76.5	14.1	 16
651	  5	304.5	54.7	 16
652	  5	130.0	17.1	 16
653	  5	79.8	10.6	 16
654	  5	151.5	21.0	 16
655	  5	188.8	26.6	 16
656	  5	154.5	17.6	 16
657	  5	1254.8	278.3	 16
658	  5	76.3	14.4	 16
659	  5	265.5	50.8	 16
660	  5	197.5	25.0	 16
661	  5	328.0	57.8	 16
662	  5	113.3	14.7	 16
663	  5	105.5	24.1	 16
664	  5	1653.0	321.6	 16
665	  5	134.8	17.6	 16
666	  5	272.3	31.8	 16
667	  5	112.8	19.1	 16
668	  5	302.3	53.9	 16
669	  5	261.8	41.4	 16
670	  5	98.3	12.3	 16
671	  5	80.3	10.5	 16
672	  5	112.8	14.7	 16
673	  5	110.3	20.3	 16
674	  5	135.0	10.4	 16
675	  5	119.8	21.3	 16
676	  5	84.0	11.3	 16
677	  5	75.3	12.9	 16
678	  5	132.3	19.0	 16
679	  5	1984.8	386.7	 16
680	  5	76.5	13.0	 16
681	  5	220.0	32.8	 16
682	  5	91.8	15.2	 16
683	  5	116.5	14.8	 16
684	  5	93.3	15.1	 16
685	  5	68.8	10.7	 16
686	  5	70.3	7.7	 16
687	  5	92.5	13.7	 16
688	  5	4007.8	866.9	 16
689	  5	276.8	38.8	 16
690	  5	116.0	18.8	 16
691	  5	457.3	67.7	 16
692	  5	176.8	28.6	 16
693	  5	206.5	25.6	 16
694	  5	275.5	31.6	 16
695	  5	138.3	24.3	 16
696	  5	99.8	12.6	 16
697	  5	109.8	16.3	 16
698	  5	83.0	11.2	 16
699	  5	230.0	47.1	 12
700	  5	70.3	12.9	 16
701	  5	113.3	21.0	 16
702	  5	128.0	20.1	 16
703	  5	196.8	24.4	 16
704	  5	85.3	10.0	 16
705	  5	190.5	35.0	 16
706	  5	134.3	18.0	 16
707	  5	124.3	14.9	 16
708	  5	98.5	16.0	 16
709	  5	107.5	18.3	 16
710	  5	122.5	16.3	 16
711	  5	135.3	18.6	 16
  0	  6	8526.0	1278.9	 16
  1	  6	101.8	23.3	 16
  2	  6	89.3	13.0	 16
  3	  6	108.3	7.6	 16
  4	  6	81.8	11.4	 16
  5	  6	92.0	11.3	 16
  6	  6	221.0	30.6	 16
  7	  6	111.0	19.8	 16
  8	  6	97.3	12.7	 16
  9	  6	325.3	33.6	 16
 10	  6	191.8	21.4	 16
 11	  6	83.5	10.5	 16
 12	  6	7406.5	1178.7	 16
 13	  6	140.0	20.8	 16
 14	  6	135.3	21.2	 16
 15	  6	123.5	14.8	 16
 16	  6	7005.0	944.7	 16
 17	  6	107.0	25.0	 16
 18	  6	127.8	16.2	 16
 19	  6	130.8	16.0	 16
 20	  6	143.5	15.4	 16
 21	  6	133.0	16.1	 16
 22	  6	140.8	20.7	 16
 23	  6	90.5	19.6	 16
 24	  6	144.0	14.0	 16
 25	  6	131.3	18.4	 16
 26	  6	137.3	17.1	 16
 27	  6	126.5	16.8	 16
 28	  6	139.3	16.8	 16
 29	  6	93.8	15.1	 16
 30	  6	136.0	20.0	 16
 31	  6	142.0	19.9	 16
 32	  6	139.5	17.1	 20
 33	  6	149.3	21.7	 16
 34	  6	138.0	24.4	 16
 35	  6	121.5	26.5	 16
 36	  6	7743.8	1884.4	 16
 37	  6	145.8	14.0	 16
 38	  6	135.8	18.1	 16
 39	  6	144.8	23.3	 16
 40	  6	6794.3	1779.6	 16
 41	  6	106.5	16.7	 16
 42	  6	8457.0	2050.5	 16
 43	  6	143.8	22.7	 16
 44	  6	128.5	15.5	 16
 45	  6	130.0	13.8	 16
 46	  6	123.8	12.1	 16
 47	  6	81.8	13.7	 16
 48	  6	113.0	15.3	 16
 49	  6	106.5	15.9	 16
 50	  6	125.8	21.3	 16
 51	  6	111.3	10.5	 16
 52	  6	124.3	19.9	 16
 53	  6	89.8	14.4	 16
 54	  6	133.3	14.1	 16
 55	  6	142.0	19.9	 16
 56	  6	129.3	10.8	 16
 57	  6	131.3	21.1	 16
 58	  6	124.3	15.9	 16
 59	  6	89.0	21.0	 16
 60	  6	84.8	13.5	 16
 61	  6	91.8	19.3	 16
 62	  6	8265.5	1808.4	 16
 63	  6	145.0	18.3	 16
 64	  6	133.8	9.6	 16
 65	  6	150.8	27.3	 16
 66	  6	6935.8	1483.6	 16
 67	  6	113.0	15.6	 16
 68	  6	7843.0	1572.5	 16
 69	  6	152.8	19.5	 16
 70	  6	135.3	19.5	 16
 71	  6	128.5	11.5	 16
 72	  6	6570.8	1297.3	 16
 73	  6	81.3	11.8	 16
 74	  6	128.3	17.5	 16
 75	  6	129.3	16.4	 16
 76	  6	113.0	19.1	 16
 77	  6	114.3	15.0	 16
 78	  6	126.0	20.4	 16
 79	  6	93.0	14.0	 16
 80	  6	7568.5	1113.7	 16
 81	  6	143.0	18.5	 16
 82	  6	135.3	15.6	 16
 83	  6	129.3	12.8	 16
 84	  6	6738.0	868.6	 16
 85	  6	138.8	53.5	 16
 86	  6	139.8	15.3	 16
 87	  6	6895.3	873.0	 16
 88	  6	7123.8	1009.7	 16
 89	  6	132.5	19.6	 16
 90	  6	126.8	20.7	 16
 91	  6	91.3	13.3	 16
 92	  6	6480.0	836.6	 16
 93	  6	139.5	19.1	 16
 94	  6	132.5	17.6	 16
 95	  6	6310.0	1116.1	 16
 96	  6	135.5	16.9	 16
 97	  6	84.0	13.8	 16
 98	  6	6941.8	1088.1	 16
 99	  6	127.3	26.3	 16
100	  6	315.3	300.3	 16
101	  6	6485.5	857.7	 16
102	  6	132.3	16.2	 16
103	  6	85.0	14.5	 16
104	  6	121.8	20.5	 16
105	  6	6973.5	831.4	 16
106	  6	144.8	11.3	 16
107	  6	6757.5	749.6	 16
108	  6	130.8	21.1	 16
109	  6	74.3	9.6	 16
110	  6	84.8	14.4	 16
111	  6	98.5	18.1	 16
112	  6	104.5	16.3	 16
113	  6	91.5	15.6	 16
114	  6	83.5	13.1	 16
115	  6	199.3	28.8	 16
116	  6	145.0	24.3	 16
117	  6	135.3	17.3	 16
118	  6	573.5	94.0	 16
119	  6	165.5	24.5	 16
120	  6	105.3	18.4	 16
121	  6	106.3	13.4	 16
122	  6	99.5	31.0	 16
123	  6	84.3	13.0	 16
124	  6	88.8	13.8	 16
125	  6	76.8	12.4	 16
126	  6	103.8	13.0	 16
127	  6	87.3	15.3	 16
128	  6	199.8	19.0	 16
129	  6	166.5	16.2	 16
130	  6	150.0	22.9	 16
131	  6	327.5	34.9	 16
132	  6	91.0	14.8	 16
133	  6	205.5	32.3	 16
134	  6	126.3	18.8	 16
135	  6	113.3	18.0	 16
136	  6	101.3	21.0	 16
137	  6	86.5	13.7	 16
138	  6	76.0	10.6	 16
139	  6	150.3	19.3	 16
140	  6	81.0	9.0	 16
141	  6	89.0	15.1	 16
142	  6	77.5	10.1	 16
143	  6	175.8	26.3	 16
144	  6	95.8	11.3	 16
145	  6	96.5	14.2	 16
146	  6	122.3	15.5	 16
147	  6	204.0	25.1	 16
148	  6	88.5	12.0	 16
149	  6	80.8	14.5	 16
150	  6	122.8	17.9	 16
151	  6	116.0	19.9	 16
152	  6	161.5	31.2	 16
153	  6	122.0	11.6	 16
154	  6	92.0	12.4	 16
155	  6	118.0	18.6	 16
156	  6	98.8	15.8	 16
157	  6	160.3	19.5	 16
158	  6	121.5	21.7	 16
159	  6	144.3	20.3	 16
160	  6	158.5	19.4	 16
161	  6	171.8	26.1	 16
162	  6	141.3	23.2	 16
163	  6	182.3	22.4	 16
164	  6	210.3	27.5	 16
165	  6	110.3	21.3	 16
166	  6	152.8	18.5	 16
167	  6	85.3	14.0	 16
168	  6	100.3	17.3	 16
169	  6	122.3	18.5	 16
170	  6	89.3	13.5	 16
171	  6	196.0	27.2	 16
172	  6	95.0	13.5	 16
173	  6	77.5	9.8	 16
174	  6	134.3	24.2	 16
175	  6	82.3	9.3	 16
176	  6	82.3	14.3	 16
177	  6	81.3	17.5	 16
178	  6	67.0	15.8	 16
179	  6	76.0	11.5	 16
180	  6	193.5	26.9	 16
181	  6	110.3	20.4	 16
182	  6	154.5	19.0	 16
183	  6	154.3	33.4	 16
184	  6	76.3	9.4	 16
185	  6	119.5	20.2	 16
186	  6	113.3	15.6	 16
187	  6	81.8	15.0	 16
188	  6	123.5	23.3	 16
189	  6	111.5	20.7	 16
190	  6	111.8	26.2	 16
191	  6	66.0	11.2	 16
192	  6	118.8	22.6	 16
193	  6	109.5	17.5	 16
194	  6	111.5	16.3	 16
195	  6	111.3	17.6	 16
196	  6	147.5	18.5	 16
197	  6	198.5	27.9	 16
198	  6	241.8	26.7	 16
199	  6	282.0	38.1	 16
200	  6	270.5	28.2	 16
201	  6	187.0	32.6	 16
202	  6	158.0	16.7	 16
203	  6	78.5	14.4	 16
204	  6	75.3	10.9	 16
205	  6	65.5	10.1	 16
206	  6	90.0	13.4	 16
207	  6	65.3	12.9	 16
208	  6	89.8	14.9	 16
209	  6	162.3	25.4	 16
210	  6	114.0	17.5	 20
211	  6	92.0	15.5	 16
212	  6	111.0	12.9	 16
213	  6	101.8	16.4	 16
214	  6	229.5	46.9	 16
215	  6	104.0	10.3	 16
216	  6	104.0	16.1	 16
217	  6	204.3	46.5	 16
218	  6	76.3	8.8	 16
219	  6	79.8	13.2	 16
220	  6	89.0	16.7	 16
221	  6	106.0	19.1	 16
222	  6	87.3	16.0	 16
223	  6	124.5	17.4	 16
224	  6	77.8	13.8	 16
225	  6	74.3	10.6	 16
226	  6	75.0	14.2	 16
227	  6	89.8	17.3	 16
228	  6	114.0	18.8	 16
229	  6	286.5	26.6	 16
230	  6	79.3	10.8	 16
231	  6	96.3	17.3	 16
232	  6	81.0	14.4	 16
233	  6	85.3	13.6	 16
234	  6	87.3	12.5	 16
235	  6	119.0	18.4	 16
236	  6	81.5	12.0	 16
237	  6	79.8	18.6	 16
238	  6	125.5	16.5	 16
239	  6	161.3	26.0	 16
240	  6	78.5	16.6	 16
241	  6	67.0	13.7	 16
242	  6	96.3	24.5	 16
243	  6	123.3	21.9	 16
244	  6	110.3	14.5	 16
245	  6	144.5	29.1	 16
246	  6	101.3	14.2	 16
247	  6	67.0	13.3	 16
248	  6	107.8	18.5	 16
249	  6	104.8	17.4	 16
250	  6	79.5	13.4	 16
251	  6	182.5	22.8	 16
252	  6	68.5	7.9	 16
253	  6	77.0	11.8	 16
254	  6	67.0	10.1	 16
255	  6	128.5	12.6	 16
256	  6	336.5	60.9	 16
257	  6	79.8	14.8	 16
258	  6	74.3	9.3	 16
259	  6	71.3	11.8	 16
260	  6	73.5	9.9	 16
261	  6	77.0	14.7	 16
262	  6	113.0	21.3	 16
263	  6	71.3	11.2	 16
264	  6	70.5	12.9	 16
265	  6	74.0	10.9	 16
266	  6	67.3	12.9	 16
267	  6	76.8	16.3	 16
268	  6	75.8	12.2	 16
269	  6	86.0	10.4	 16
270	  6	86.0	15.7	 16
271	  6	126.5	20.2	 16
272	  6	147.5	20.4	 16
273	  6	112.5	14.1	 16
274	  6	77.3	11.5	 16
275	  6	83.0	12.4	 16
276	  6	69.8	13.4	 16
277	  6	76.3	11.1	 16
278	  6	107.3	20.2	 16
279	  6	73.3	9.3	 16
280	  6	101.8	14.7	 16
281	  6	516.5	75.4	 16
282	  6	486.8	53.6	 16
283	  6	268.5	29.0	 16
284	  6	105.0	17.0	 16
285	  6	280.0	22.4	 16
286	  6	71.3	13.4	 16
287	  6	80.0	13.3	 16
288	  6	306.5	32.2	 16
289	  6	220.5	27.0	 16
290	  6	161.5	25.4	 16
291	  6	112.8	18.8	 16
292	  6	100.8	15.5	 16
293	  6	95.3	13.8	 16
294	  6	139.0	22.0	 16
295	  6	86.3	14.5	 16
296	  6	91.3	18.8	 16
297	  6	148.5	21.8	 16
298	  6	76.8	11.9	 16
299	  6	83.0	13.7	 16
300	  6	598.3	45.3	 16
301	  6	84.5	16.8	 16
302	  6	117.5	42.4	 16
303	  6	211.5	35.8	 16
304	  6	122.5	16.4	 16
305	  6	75.5	9.1	 16
306	  6	285.8	43.4	 16
307	  6	94.0	16.5	 16
308	  6	84.0	12.3	 16
309	  6	110.3	16.4	 16
310	  6	77.3	13.0	 16
311	  6	127.3	12.6	 16
312	  6	80.3	8.8	 16
313	  6	91.0	13.4	 16
314	  6	175.3	25.3	 16
315	  6	84.3	12.0	 16
316	  6	96.8	16.0	 16
317	  6	76.3	12.2	 16
318	  6	80.0	12.7	 16
319	  6	70.3	9.7	 16
320	  6	72.5	12.1	 16
321	  6	64.8	6.0	 16
322	  6	69.3	12.1	 16
323	  6	95.0	12.3	 16
324	  6	133.3	23.1	 16
325	  6	184.3	24.7	 16
326	  6	193.0	38.8	 16
327	  6	134.8	16.9	 16
328	  6	177.3	22.8	 16
329	  6	557.5	47.1	 16
330	  6	261.8	22.6	 16
331	  6	110.8	14.4	 16
332	  6	108.3	14.2	 16
333	  6	279.0	33.1	 16
334	  6	100.3	16.2	 16
335	  6	86.3	17.0	 16
336	  6	70.3	12.7	 16
337	  6	120.3	18.8	 16
338	  6	89.3	12.9	 16
339	  6	84.3	19.2	 16
340	  6	160.8	19.1	 16
341	  6	119.3	19.2	 16
342	  6	67.0	12.7	 16
343	  6	68.3	15.3	 16
344	  6	98.8	15.0	 16
345	  6	88.0	10.5	 16
346	  6	89.3	12.1	 16
347	  6	602.3	70.8	 16
348	  6	74.5	12.8	 16
349	  6	92.8	15.5	 16
350	  6	162.0	21.2	 16
351	  6	401.5	38.8	 16
352	  6	418.8	37.9	 16
353	  6	90.5	19.2	 16
354	  6	70.8	12.2	 16
355	  6	354.5	44.8	 16
356	  6	83.5	14.3	 16
357	  6	79.3	15.1	 16
358	  6	80.5	10.5	 16
359	  6	108.3	15.7	 16
360	  6	101.5	14.5	 16
361	  6	185.5	19.2	 16
362	  6	207.0	21.9	 16
363	  6	85.3	16.0	 16
364	  6	75.0	15.1	 16
365	  6	69.0	12.8	 16
366	  6	64.5	9.4	 16
367	  6	128.3	19.4	 16
368	  6	87.5	13.6	 16
369	  6	83.8	11.5	 16
370	  6	101.8	19.7	 16
371	  6	365.3	48.0	 16
372	  6	159.0	25.2	 16
373	  6	135.3	14.9	 16
374	  6	80.3	10.7	 16
375	  6	76.5	13.3	 16
376	  6	78.3	17.1	 16
377	  6	90.8	18.0	 16
378	  6	102.3	13.7	 16
379	  6	131.3	24.9	 16
380	  6	151.5	24.4	 16
381	  6	138.8	17.4	 16
382	  6	164.8	24.1	 16
383	  6	337.3	39.9	 16
384	  6	109.0	23.4	 16
385	  6	104.5	12.4	 16
386	  6	104.3	18.1	 16
387	  6	119.0	17.8	 16
388	  6	115.3	18.9	 20
389	  6	317.3	43.1	 16
390	  6	90.5	11.9	 16
391	  6	82.8	12.8	 16
392	  6	162.8	25.1	 16
393	  6	75.0	9.0	 16
394	  6	91.3	12.9	 16
395	  6	65.5	9.6	 16
396	  6	98.5	14.6	 16
397	  6	127.0	17.0	 16
398	  6	142.5	19.3	 16
399	  6	89.3	14.0	 16
400	  6	122.3	11.4	 16
401	  6	143.3	18.7	 16
402	  6	84.3	18.0	 16
403	  6	69.5	10.5	 16
404	  6	117.3	24.2	 16
405	  6	75.0	9.8	 16
406	  6	97.0	15.0	 16
407	  6	173.5	24.1	 16
408	  6	138.5	20.8	 16
409	  6	95.0	11.0	 16
410	  6	156.3	25.6	 16
411	  6	195.0	27.1	 16
412	  6	101.8	14.7	 16
413	  6	95.0	16.4	 16
414	  6	132.3	22.7	 16
415	  6	534.3	87.4	 16
416	  6	557.5	79.1	 16
417	  6	122.3	15.3	 16
418	  6	163.3	23.3	 16
419	  6	238.0	30.7	 16
420	  6	80.0	10.5	 16
421	  6	75.0	13.6	 16
422	  6	73.3	13.2	 16
423	  6	74.3	11.2	 16
424	  6	75.3	13.6	 16
425	  6	159.3	19.5	 16
426	  6	94.3	16.5	 16
427	  6	69.8	13.4	 16
428	  6	93.0	13.4	 16
429	  6	117.3	21.7	 16
430	  6	87.0	19.4	 16
431	  6	88.3	14.1	 16
432	  6	267.3	32.6	 16
433	  6	131.3	24.9	 16
434	  6	111.5	37.9	 16
435	  6	85.3	18.7	 16
436	  6	67.3	10.4	 16
437	  6	85.3	12.8	 16
438	  6	99.3	19.6	 16
439	  6	156.5	17.3	 16
440	  6	124.0	20.7	 16
441	  6	111.8	16.6	 16
442	  6	215.3	22.3	 16
443	  6	131.3	17.3	 16
444	  6	137.8	22.3	 16
445	  6	144.3	29.7	 16
446	  6	98.0	9.8	 16
447	  6	81.3	14.1	 16
448	  6	808.0	75.4	 16
449	  6	253.5	34.2	 16
450	  6	246.0	30.2	 16
451	  6	131.0	18.9	 16
452	  6	166.0	12.4	 16
453	  6	133.3	19.7	 16
454	  6	328.3	31.0	 16
455	  6	69.5	14.3	 16
456	  6	78.8	12.4	 16
457	  6	86.3	11.7	 16
458	  6	178.5	18.4	 16
459	  6	154.5	35.4	 16
460	  6	74.5	13.7	 16
461	  6	123.0	12.0	 16
462	  6	81.3	10.5	 16
463	  6	147.3	23.0	 16
464	  6	996.3	61.5	 16
465	  6	527.3	87.4	 16
466	  6	160.5	21.8	 16
467	  6	124.5	19.2	 16
468	  6	87.5	15.5	 16
469	  6	168.5	22.7	 16
470	  6	83.3	12.0	 16
471	  6	110.3	11.6	 16
472	  6	137.8	16.9	 16
473	  6	128.3	22.6	 16
474	  6	81.8	15.8	 16
475	  6	77.5	13.4	 16
476	  6	75.5	10.9	 16
477	  6	94.5	11.0	 16
478	  6	98.8	15.8	 16
479	  6	72.3	13.2	 16
480	  6	79.8	13.0	 16
481	  6	89.3	15.1	 16
482	  6	143.8	22.6	 16
483	  6	85.5	12.4	 16
484	  6	125.0	18.8	 16
485	  6	199.8	25.1	 16
486	  6	111.5	9.7	 16
487	  6	182.3	15.6	 16
488	  6	87.3	14.0	 16
489	  6	105.0	13.4	 16
490	  6	89.5	11.4	 16
491	  6	108.5	17.0	 16
492	  6	89.0	16.1	 16
493	  6	78.5	12.3	 16
494	  6	73.5	10.4	 16
495	  6	172.8	23.9	 16
496	  6	457.0	34.3	 16
497	  6	109.5	19.2	 16
498	  6	116.8	18.0	 16
499	  6	93.0	14.3	 16
500	  6	113.0	19.0	 16
501	  6	183.0	16.4	 16
502	  6	81.0	11.1	 16
503	  6	241.8	26.0	 16
504	  6	85.8	15.0	 16
505	  6	144.0	24.7	 16
506	  6	85.3	13.3	 16
507	  6	95.0	21.4	 16
508	  6	284.3	31.2	 16
509	  6	1021.0	101.3	 16
510	  6	139.8	19.6	 16
511	  6	122.0	24.1	 16
512	  6	92.8	21.1	 16
513	  6	90.5	16.2	 16
514	  6	67.3	10.1	 16
515	  6	72.8	13.9	 16
516	  6	68.3	10.2	 16
517	  6	114.8	13.4	 16
518	  6	96.8	18.0	 16
519	  6	101.0	21.2	 16
520	  6	94.5	14.4	 16
521	  6	150.3	18.1	 16
522	  6	98.3	12.6	 16
523	  6	266.3	37.1	 16
524	  6	462.0	58.0	 16
525	  6	70.5	10.1	 16
526	  6	665.3	99.1	 16
527	  6	101.0	19.3	 16
528	  6	81.0	11.4	 16
529	  6	125.3	14.5	 16
530	  6	100.3	15.8	 16
531	  6	151.3	16.9	 16
532	  6	133.3	18.2	 16
533	  6	120.3	17.8	 16
534	  6	100.5	15.4	 16
535	  6	165.3	22.0	 16
536	  6	380.3	34.2	 16
537	  6	115.8	21.2	 16
538	  6	1396.0	276.6	 16
539	  6	221.8	30.8	 16
540	  6	75.5	10.5	 16
541	  6	142.0	14.6	 16
542	  6	126.5	23.7	 16
543	  6	69.0	9.4	 16
544	  6	138.0	17.4	 16
545	  6	185.5	28.4	 16
546	  6	188.3	17.5	 16
547	  6	197.5	29.8	 16
548	  6	227.3	31.3	 16
549	  6	202.0	10.6	 16
550	  6	113.3	16.3	 16
551	  6	138.0	19.8	 16
552	  6	76.3	12.3	 16
553	  6	70.0	11.6	 16
554	  6	67.3	9.4	 16
555	  6	77.5	13.6	 16
556	  6	76.0	12.7	 16
557	  6	71.3	10.6	 16
558	  6	96.8	15.0	 16
559	  6	80.3	11.4	 16
560	  6	203.3	43.8	 16
561	  6	109.3	33.2	 16
562	  6	1282.8	407.0	 16
563	  6	124.0	20.0	 16
564	  6	95.5	16.8	 16
565	  6	96.3	12.9	 16
566	  6	173.0	43.3	 20
567	  6	121.8	19.3	 16
568	  6	92.8	16.9	 16
569	  6	138.3	18.5	 16
570	  6	327.0	40.6	 16
571	  6	92.5	14.8	 16
572	  6	106.3	17.5	 16
573	  6	87.8	17.4	 16
574	  6	120.5	22.7	 16
575	  6	83.3	11.7	 16
576	  6	106.5	15.9	 16
577	  6	68.5	15.4	 16
578	  6	73.5	13.7	 16
579	  6	193.5	24.0	 16
580	  6	196.5	20.3	 16
581	  6	418.5	31.0	 16
582	  6	438.8	64.0	 16
583	  6	262.3	26.3	 16
584	  6	135.0	19.2	 16
585	  6	163.5	18.9	 16
586	  6	122.8	17.2	 16
587	  6	106.0	13.9	 16
588	  6	76.8	14.0	 16
589	  6	77.0	11.1	 16
590	  6	78.5	11.9	 16
591	  6	72.8	8.8	 16
592	  6	209.5	25.5	 16
593	  6	156.5	18.7	 16
594	  6	144.3	15.0	 16
595	  6	85.0	33.1	 16
596	  6	83.5	12.6	 16
597	  6	103.5	19.1	 16
598	  6	99.3	15.7	 16
599	  6	67.5	10.0	 16
600	  6	77.3	15.9	 16
601	  6	96.8	19.6	 16
602	  6	133.5	17.5	 16
603	  6	80.5	14.0	 16
604	  6	88.3	14.3	 16
605	  6	62.5	11.3	 16
606	  6	73.5	13.4	 16
607	  6	92.8	30.8	 16
608	  6	62.8	11.1	 16
609	  6	120.8	17.3	 16
610	  6	67.8	7.3	 16
611	  6	68.0	9.7	 16
612	  6	76.0	11.8	 16
613	  6	79.8	11.2	 16
614	  6	148.3	18.9	 16
615	  6	101.5	20.3	 16
616	  6	95.0	12.8	 16
617	  6	132.0	34.5	 16
618	  6	76.5	8.6	 16
619	  6	66.3	12.0	 16
620	  6	64.5	10.5	 16
621	  6	69.3	6.9	 16
622	  6	65.8	13.4	 16
623	  6	149.0	20.9	 16
624	  6	102.0	18.7	 16
625	  6	81.0	14.1	 16
626	  6	779.0	77.6	 16
627	  6	121.3	22.9	 16
628	  6	64.5	15.8	 16
629	  6	132.8	18.1	 16
630	  6	75.0	12.4	 16
631	  6	67.0	11.5	 16
632	  6	98.5	14.0	 12
633	  6	99.3	12.1	 16
634	  6	105.5	17.5	 16
635	  6	111.5	35.3	 16
636	  6	81.3	17.5	 16
637	  6	281.3	31.4	 16
638	  6	625.5	52.7	 16
639	  6	75.0	13.5	 16
640	  6	88.3	8.3	 16
641	  6	70.8	10.8	 16
642	  6	71.5	14.1	 16
643	  6	75.3	10.9	 16
644	  6	139.5	72.7	 16
645	  6	116.8	21.0	 16
646	  6	76.3	12.2	 16
647	  6	65.5	10.4	 16
648	  6	150.3	26.8	 16
649	  6	73.0	10.9	 16
650	  6	78.0	14.2	 16
651	  6	277.5	39.4	 16
652	  6	150.5	28.9	 16
653	  6	81.5	11.8	 16
654	  6	126.0	21.7	 16
655	  6	184.3	20.4	 16
656	  6	201.8	20.1	 16
657	  6	692.0	76.7	 16
658	  6	88.5	13.2	 16
659	  6	184.5	23.6	 16
660	  6	154.0	27.8	 16
661	  6	111.3	16.9	 16
662	  6	87.3	19.8	 16
663	  6	83.8	17.3	 16
664	  6	585.8	87.6	 16
665	  6	135.0	20.0	 16
666	  6	194.3	29.2	 16
667	  6	101.0	11.4	 16
668	  6	143.8	20.3	 16
669	  6	79.8	15.8	 16
670	  6	72.5	10.8	 16
671	  6	91.5	13.1	 16
672	  6	115.3	19.3	 16
673	  6	74.0	11.6	 16
674	  6	112.8	14.8	 16
675	  6	76.5	11.4	 16
676	  6	95.3	31.2	 16
677	  6	73.0	19.0	 16
678	  6	68.5	13.0	 16
679	  6	170.3	34.5	 16
680	  6	67.3	10.5	 16
681	  6	176.3	24.0	 16
682	  6	108.3	19.8	 16
683	  6	103.3	15.8	 16
684	  6	83.5	11.5	 16
685	  6	69.5	12.7	 16
686	  6	88.8	14.9	 16
687	  6	75.3	10.1	 16
688	  6	759.8	143.9	 16
689	  6	161.8	28.3	 16
690	  6	176.5	31.5	 16
691	  6	174.0	27.1	 16
692	  6	128.0	46.9	 16
693	  6	105.3	14.2	 16
694	  6	91.3	15.7	 16
695	  6	106.5	25.7	 16
696	  6	103.8	16.5	 16
697	  6	118.8	18.1	 16
698	  6	74.8	11.2	 16
699	  6	90.0	16.3	 16
700	  6	69.0	11.9	 16
701	  6	90.5	12.5	 16
702	  6	118.5	21.8	 16
703	  6	136.3	22.4	 16
704	  6	87.8	12.2	 16
705	  6	109.8	18.9	 16
706	  6	118.0	13.8	 16
707	  6	126.0	18.6	 16
708	  6	84.3	10.6	 16
709	  6	99.8	22.1	 16
710	  6	108.0	13.6	 16
711	  6	269.0	54.8	 16
  0	  7	129.0	20.6	 16
  1	  7	103.8	13.3	 16
  2	  7	110.0	10.0	 16
  3	  7	211.0	33.8	 16
  4	  7	123.8	25.2	 16
  5	  7	153.8	21.8	 16
  6	  7	83.5	10.9	 16
  7	  7	107.3	20.0	 16
  8	  7	183.3	22.0	 16
  9	  7	326.0	41.3	 16
 10	  7	172.0	20.4	 16
 11	  7	81.0	13.4	 16
 12	  7	7600.8	669.3	 16
 13	  7	149.3	19.5	 16
 14	  7	132.3	14.4	 16
 15	  7	141.3	18.9	 16
 16	  7	149.3	22.0	 16
 17	  7	94.8	11.6	 16
 18	  7	137.3	18.3	 16
 19	  7	7089.0	642.5	 16
 20	  7	7181.5	523.8	 16
 21	  7	6887.8	993.4	 16
 22	  7	143.8	25.5	 16
 23	  7	108.0	17.3	 16
 24	  7	7981.8	600.4	 16
 25	  7	157.3	20.6	 16
 26	  7	6589.3	535.8	 16
 27	  7	6534.3	447.0	 16
 28	  7	137.3	16.6	 16
 29	  7	97.5	17.0	 16
 30	  7	158.3	28.0	 16
 31	  7	7368.0	925.2	 16
 32	  7	7227.0	569.3	 16
 33	  7	7040.3	528.3	 16
 34	  7	154.5	21.8	 16
 35	  7	83.8	14.7	 16
 36	  7	8172.0	526.8	 16
 37	  7	171.8	70.0	 16
 38	  7	137.8	18.6	 16
 39	  7	124.0	16.9	 16
 40	  7	136.5	15.6	 16
 41	  7	99.3	16.2	 16
 42	  7	8574.5	587.5	 16
 43	  7	174.3	26.1	 16
 44	  7	6989.0	926.8	 16
 45	  7	6846.0	1037.2	 16
 46	  7	147.0	21.2	 16
 47	  7	89.8	13.3	 16
 48	  7	106.0	16.8	 16
 49	  7	124.8	16.4	 16
 50	  7	5567.0	620.1	 16
 51	  7	139.3	18.8	 20
 52	  7	129.3	19.9	 16
 53	  7	99.5	28.9	 16
 54	  7	7994.8	1505.6	 16
 55	  7	7576.3	1067.8	 16
 56	  7	6885.0	1863.7	 16
 57	  7	158.5	27.2	 16
 58	  7	124.3	16.0	 16
 59	  7	81.0	16.4	 16
 60	  7	79.5	11.3	 16
 61	  7	106.0	28.8	 16
 62	  7	8615.3	2062.5	 16
 63	  7	152.3	20.4	 16
 64	  7	135.5	16.1	 16
 65	  7	170.8	26.0	 16
 66	  7	7571.0	1831.2	 16
 67	  7	124.3	26.8	 16
 68	  7	8249.8	1921.2	 16
 69	  7	146.0	25.9	 16
 70	  7	122.8	14.7	 16
 71	  7	140.3	19.4	 16
 72	  7	127.3	19.7	 16
 73	  7	81.3	12.0	 16
 74	  7	118.8	15.6	 16
 75	  7	132.3	17.5	 16
 76	  7	139.3	30.3	 16
 77	  7	121.0	20.2	 16
 78	  7	137.8	30.0	 16
 79	  7	84.5	13.2	 16
 80	  7	7676.8	1397.2	 16
 81	  7	132.3	18.2	 16
 82	  7	119.8	13.7	 16
 83	  7	135.3	14.1	 16
 84	  7	6915.8	1054.4	 16
 85	  7	94.8	15.7	 16
 86	  7	124.0	16.8	 16
 87	  7	138.3	15.1	 16
 88	  7	6605.8	970.3	 16
 89	  7	140.0	14.5	 16
 90	  7	130.5	22.1	 16
 91	  7	77.8	10.1	 16
 92	  7	117.8	16.4	 16
 93	  7	123.5	15.2	 16
 94	  7	143.3	22.7	 16
 95	  7	6627.5	881.0	 16
 96	  7	134.5	22.7	 16
 97	  7	80.8	7.7	 16
 98	  7	117.3	16.5	 16
 99	  7	118.5	17.9	 16
100	  7	123.5	17.0	 16
101	  7	6521.8	895.9	 16
102	  7	131.8	21.5	 16
103	  7	88.5	14.7	 16
104	  7	132.0	12.6	 16
105	  7	7261.5	946.8	 16
106	  7	148.3	23.4	 16
107	  7	7160.3	941.8	 16
108	  7	130.0	21.3	 16
109	  7	75.5	13.4	 16
110	  7	66.5	10.7	 16
111	  7	100.0	17.7	 16
112	  7	134.0	18.1	 16
113	  7	94.5	14.4	 16
114	  7	83.5	12.1	 16
115	  7	105.0	13.4	 16
116	  7	374.5	52.5	 16
117	  7	178.5	27.6	 16
118	  7	106.0	16.4	 16
119	  7	252.0	26.9	 16
120	  7	186.5	25.3	 16
121	  7	495.5	51.5	 16
122	  7	195.5	35.7	 16
123	  7	317.8	50.0	 16
124	  7	140.3	16.8	 16
125	  7	431.3	44.8	 16
126	  7	6219.5	424.1	 16
127	  7	7418.5	5938.3	 16
128	  7	7075.3	922.2	 16
129	  7	212.5	25.0	 16
130	  7	107.0	17.9	 16
131	  7	1920.0	122.8	 16
132	  7	129.5	21.8	 16
133	  7	1199.3	79.0	 16
134	  7	458.5	34.7	 16
135	  7	371.0	50.3	 16
136	  7	352.3	41.9	 16
137	  7	122.8	21.9	 16
138	  7	126.3	17.7	 16
139	  7	192.8	28.3	 16
140	  7	73.8	9.6	 16
141	  7	94.0	13.8	 16
142	  7	100.5	16.8	 16
143	  7	211.8	23.9	 16
144	  7	136.3	16.8	 16
145	  7	520.5	82.1	 16
146	  7	90.5	14.1	 16
147	  7	110.3	13.9	 16
148	  7	100.3	17.5	 16
149	  7	98.3	12.1	 16
150	  7	81.5	11.2	 16
151	  7	99.3	11.4	 16
152	  7	176.0	29.1	 16
153	  7	134.8	21.9	 16
154	  7	150.8	19.7	 16
155	  7	105.8	16.2	 16
156	  7	705.0	57.9	 16
157	  7	715.3	61.4	 16
158	  7	181.5	19.2	 16
159	  7	227.8	34.6	 16
160	  7	120.3	15.1	 16
161	  7	125.3	19.5	 16
162	  7	97.3	14.0	 16
163	  7	102.0	17.7	 16
164	  7	118.0	16.7	 16
165	  7	161.3	32.2	 16
166	  7	87.3	12.6	 16
167	  7	143.0	26.4	 16
168	  7	108.5	15.4	 16
169	  7	163.3	22.9	 16
170	  7	224.5	37.5	 16
171	  7	269.3	38.9	 16
172	  7	92.3	14.3	 16
173	  7	92.8	15.8	 16
174	  7	751.3	75.3	 16
175	  7	87.3	11.7	 16
176	  7	159.3	16.4	 16
177	  7	74.3	13.4	 16
178	  7	79.5	13.4	 16
179	  7	87.3	13.7	 16
180	  7	196.0	15.6	 16
181	  7	98.3	16.8	 16
182	  7	421.5	35.1	 16
183	  7	75.0	12.8	 16
184	  7	82.5	14.5	 16
185	  7	79.5	13.1	 16
186	  7	131.0	16.0	 16
187	  7	89.8	15.2	 16
188	  7	148.0	19.1	 16
189	  7	132.5	14.8	 16
190	  7	152.8	24.4	 16
191	  7	100.5	13.0	 16
192	  7	101.0	21.2	 16
193	  7	136.5	20.2	 16
194	  7	149.3	16.4	 16
195	  7	94.8	16.2	 16
196	  7	74.0	12.9	 16
197	  7	96.3	18.8	 16
198	  7	137.5	17.4	 16
199	  7	1114.5	109.6	 16
200	  7	212.8	26.5	 16
201	  7	111.0	15.3	 16
202	  7	94.3	11.3	 16
203	  7	129.3	17.8	 16
204	  7	120.0	16.9	 16
205	  7	83.3	10.5	 16
206	  7	156.0	29.7	 16
207	  7	82.3	11.5	 16
208	  7	92.0	11.8	 16
209	  7	75.3	11.5	 16
210	  7	97.0	14.7	 16
211	  7	88.3	11.0	 16
212	  7	122.0	22.2	 16
213	  7	130.0	22.9	 16
214	  7	156.5	23.1	 16
215	  7	145.8	17.7	 16
216	  7	100.8	15.8	 16
217	  7	186.5	27.6	 16
218	  7	113.0	15.2	 16
219	  7	76.3	17.0	 16
220	  7	143.0	21.7	 16
221	  7	136.5	22.7	 16
222	  7	839.0	79.7	 16
223	  7	98.3	13.4	 16
224	  7	77.8	12.2	 16
225	  7	138.0	18.5	 16
226	  7	187.3	31.1	 16
227	  7	135.3	14.2	 16
228	  7	187.8	21.0	 16
229	  7	81.5	17.6	 20
230	  7	93.3	16.2	 16
231	  7	429.0	106.0	 16
232	  7	83.5	14.3	 16
233	  7	112.0	18.4	 16
234	  7	82.5	11.3	 16
235	  7	98.8	14.8	 16
236	  7	192.8	30.0	 16
237	  7	81.3	16.3	 16
238	  7	90.0	18.0	 16
239	  7	467.8	60.1	 16
240	  7	80.8	14.3	 16
241	  7	111.5	15.0	 16
242	  7	163.0	22.4	 16
243	  7	183.3	23.7	 16
244	  7	847.5	114.0	 16
245	  7	75.8	12.7	 16
246	  7	68.8	11.7	 16
247	  7	113.3	14.7	 16
248	  7	103.0	25.0	 16
249	  7	116.3	17.2	 16
250	  7	78.8	15.3	 16
251	  7	117.3	19.4	 16
252	  7	278.5	29.1	 16
253	  7	71.8	10.0	 16
254	  7	122.5	12.6	 16
255	  7	91.0	14.9	 16
256	  7	83.5	24.9	 16
257	  7	99.5	19.3	 16
258	  7	77.3	11.6	 16
259	  7	161.3	26.2	 16
260	  7	137.0	16.7	 16
261	  7	191.3	30.6	 16
262	  7	93.0	16.0	 16
263	  7	2548.8	357.7	 16
264	  7	113.0	15.5	 16
265	  7	79.0	13.2	 16
266	  7	77.8	11.7	 16
267	  7	358.5	30.3	 16
268	  7	388.8	65.2	 16
269	  7	72.3	11.0	 16
270	  7	73.8	8.9	 16
271	  7	138.0	22.9	 16
272	  7	314.5	45.1	 16
273	  7	113.3	16.4	 16
274	  7	129.5	21.2	 16
275	  7	109.5	17.6	 16
276	  7	170.8	24.1	 16
277	  7	121.8	25.2	 16
278	  7	181.8	18.9	 16
279	  7	79.8	13.6	 16
280	  7	97.5	22.6	 16
281	  7	109.5	20.5	 16
282	  7	1125.0	90.3	 16
283	  7	95.0	17.0	 16
284	  7	162.3	25.5	 16
285	  7	107.0	12.0	 16
286	  7	92.0	13.3	 16
287	  7	458.8	85.8	 16
288	  7	181.0	23.3	 16
289	  7	151.5	13.4	 16
290	  7	122.3	16.1	 16
291	  7	265.0	26.5	 16
292	  7	84.0	13.0	 16
293	  7	165.0	29.5	 16
294	  7	137.0	35.4	 16
295	  7	96.3	15.0	 16
296	  7	98.5	11.8	 16
297	  7	83.8	12.1	 16
298	  7	206.5	26.8	 16
299	  7	202.3	31.5	 16
300	  7	185.5	24.1	 16
301	  7	444.3	51.5	 16
302	  7	68.3	11.6	 16
303	  7	190.5	25.5	 16
304	  7	116.8	15.0	 16
305	  7	81.8	18.0	 16
306	  7	772.5	41.6	 16
307	  7	104.8	19.3	 16
308	  7	203.8	24.5	 16
309	  7	108.5	24.2	 16
310	  7	108.0	18.5	 16
311	  7	190.0	25.4	 16
312	  7	134.8	16.0	 16
313	  7	160.0	24.8	 16
314	  7	214.0	16.7	 16
315	  7	177.3	21.6	 16
316	  7	431.3	37.9	 16
317	  7	112.3	13.5	 16
318	  7	80.0	11.7	 16
319	  7	91.3	11.3	 16
320	  7	70.3	9.9	 16
321	  7	420.8	68.8	 16
322	  7	143.5	16.9	 16
323	  7	113.3	25.4	 16
324	  7	194.8	38.9	 16
325	  7	254.5	43.8	 16
326	  7	833.8	80.4	 16
327	  7	222.0	32.1	 16
328	  7	83.0	13.5	 16
329	  7	145.8	17.9	 16
330	  7	303.5	49.0	 16
331	  7	125.3	11.6	 16
332	  7	119.3	9.8	 16
333	  7	6656.8	534.1	 16
334	  7	7135.0	367.1	 16
335	  7	148.3	23.4	 16
336	  7	76.3	11.4	 16
337	  7	89.0	13.6	 16
338	  7	103.3	11.2	 16
339	  7	123.5	14.9	 16
340	  7	130.5	17.2	 16
341	  7	79.3	10.5	 16
342	  7	170.5	27.1	 16
343	  7	79.0	18.7	 16
344	  7	98.5	13.3	 16
345	  7	150.5	32.3	 16
346	  7	160.3	23.7	 16
347	  7	300.3	34.6	 16
348	  7	224.0	32.1	 16
349	  7	90.8	12.4	 16
350	  7	98.3	19.3	 16
351	  7	85.0	15.4	 16
352	  7	230.0	31.2	 16
353	  7	90.3	8.8	 16
354	  7	77.3	12.9	 16
355	  7	104.0	15.6	 16
356	  7	151.3	17.5	 16
357	  7	200.8	24.1	 16
358	  7	999.8	98.8	 16
359	  7	198.0	21.9	 16
360	  7	248.5	32.1	 16
361	  7	90.3	10.5	 16
362	  7	113.8	19.9	 16
363	  7	95.8	16.1	 16
364	  7	65.0	11.2	 16
365	  7	102.3	15.8	 16
366	  7	162.0	18.6	 16
367	  7	128.0	23.4	 16
368	  7	80.5	14.4	 16
369	  7	104.3	10.7	 16
370	  7	190.0	26.2	 16
371	  7	195.0	20.5	 16
372	  7	269.0	38.7	 16
373	  7	172.8	29.9	 16
374	  7	226.5	33.9	 16
375	  7	75.3	14.5	 16
376	  7	94.8	17.1	 16
377	  7	94.5	14.8	 16
378	  7	128.8	17.8	 16
379	  7	346.0	65.6	 16
380	  7	341.0	73.6	 16
381	  7	145.0	21.0	 16
382	  7	172.8	33.7	 16
383	  7	1139.3	89.3	 16
384	  7	248.5	60.2	 16
385	  7	125.3	21.4	 16
386	  7	108.3	23.7	 16
387	  7	186.0	60.2	 16
388	  7	130.5	25.0	 16
389	  7	72.0	11.4	 16
390	  7	84.3	15.0	 16
391	  7	245.5	41.6	 16
392	  7	73.8	13.5	 16
393	  7	78.8	12.7	 16
394	  7	155.8	31.3	 16
395	  7	270.3	34.9	 16
396	  7	494.8	99.7	 16
397	  7	534.3	62.3	 16
398	  7	76.5	11.5	 16
399	  7	81.0	17.1	 16
400	  7	84.3	8.4	 16
401	  7	228.3	37.8	 16
402	  7	227.5	30.8	 16
403	  7	130.3	20.3	 16
404	  7	92.3	23.0	 16
405	  7	74.3	9.1	 16
406	  7	551.8	128.5	 16
407	  7	114.3	21.1	 20
408	  7	78.8	11.5	 16
409	  7	103.3	16.0	 16
410	  7	107.0	15.4	 16
411	  7	168.5	21.3	 16
412	  7	194.3	26.1	 16
413	  7	487.0	59.5	 16
414	  7	79.3	11.0	 16
415	  7	129.8	14.1	 16
416	  7	86.3	15.6	 16
417	  7	119.0	15.1	 16
418	  7	402.0	44.2	 16
419	  7	76.0	15.4	 16
420	  7	58.3	10.2	 16
421	  7	62.8	9.1	 16
422	  7	81.3	14.1	 16
423	  7	115.0	17.0	 16
424	  7	354.0	33.9	 16
425	  7	147.5	15.9	 16
426	  7	315.3	31.1	 16
427	  7	238.3	39.7	 16
428	  7	185.0	22.1	 16
429	  7	78.3	15.7	 16
430	  7	81.3	15.0	 16
431	  7	77.5	10.0	 16
432	  7	147.8	24.8	 16
433	  7	80.0	14.0	 16
434	  7	146.0	22.7	 16
435	  7	140.5	11.2	 16
436	  7	163.3	26.0	 16
437	  7	114.3	20.0	 16
438	  7	124.5	13.3	 16
439	  7	70.5	8.0	 16
440	  7	113.8	22.8	 16
441	  7	210.3	20.2	 16
442	  7	129.3	12.4	 16
443	  7	233.5	30.8	 16
444	  7	220.5	62.8	 16
445	  7	99.8	6.6	 16
446	  7	117.0	23.2	 16
447	  7	295.3	43.0	 16
448	  7	237.5	29.5	 16
449	  7	249.0	34.7	 16
450	  7	327.5	34.1	 16
451	  7	95.0	15.0	 16
452	  7	223.0	31.5	 16
453	  7	203.0	22.0	 16
454	  7	404.0	43.6	 16
455	  7	193.3	24.5	 16
456	  7	178.0	35.2	 16
457	  7	72.0	13.6	 16
458	  7	89.3	13.8	 16
459	  7	155.0	25.9	 16
460	  7	345.5	38.4	 16
461	  7	82.5	9.4	 16
462	  7	521.3	75.9	 16
463	  7	82.0	14.8	 16
464	  7	72.5	9.3	 16
465	  7	71.8	10.7	 16
466	  7	135.3	18.8	 16
467	  7	144.5	23.0	 16
468	  7	77.8	10.2	 16
469	  7	89.0	14.8	 16
470	  7	173.3	24.5	 16
471	  7	107.5	14.2	 16
472	  7	80.5	12.8	 16
473	  7	103.3	16.2	 16
474	  7	72.0	12.3	 16
475	  7	125.3	22.0	 16
476	  7	68.5	10.3	 16
477	  7	120.0	20.9	 16
478	  7	69.3	12.5	 16
479	  7	78.8	13.3	 16
480	  7	72.3	10.3	 16
481	  7	80.8	16.8	 16
482	  7	214.5	30.1	 16
483	  7	314.0	34.3	 16
484	  7	90.3	14.2	 16
485	  7	154.8	20.4	 16
486	  7	144.3	13.7	 16
487	  7	168.3	14.6	 16
488	  7	222.3	23.3	 16
489	  7	82.3	8.4	 16
490	  7	93.5	16.5	 16
491	  7	75.0	11.0	 16
492	  7	79.5	13.9	 16
493	  7	224.0	29.8	 16
494	  7	123.8	23.0	 16
495	  7	425.0	28.5	 16
496	  7	78.3	10.6	 16
497	  7	137.3	23.3	 16
498	  7	109.0	13.7	 16
499	  7	206.0	24.5	 16
500	  7	133.0	22.2	 16
501	  7	110.0	14.8	 16
502	  7	458.0	40.0	 16
503	  7	640.0	46.9	 16
504	  7	234.3	42.9	 16
505	  7	356.8	42.7	 16
506	  7	180.5	26.9	 16
507	  7	196.8	31.6	 16
508	  7	114.5	16.3	 16
509	  7	161.5	16.8	 16
510	  7	131.5	16.3	 16
511	  7	135.3	15.2	 16
512	  7	96.3	16.7	 16
513	  7	65.5	9.8	 16
514	  7	72.3	12.6	 16
515	  7	80.3	13.9	 16
516	  7	78.3	13.1	 16
517	  7	352.3	44.2	 16
518	  7	106.5	13.4	 16
519	  7	122.5	15.7	 16
520	  7	103.5	20.9	 16
521	  7	93.5	23.9	 16
522	  7	107.8	12.9	 16
523	  7	98.3	15.3	 16
524	  7	114.5	15.2	 16
525	  7	70.5	13.5	 16
526	  7	71.3	13.3	 16
527	  7	79.3	12.0	 16
528	  7	107.8	13.7	 16
529	  7	92.5	16.5	 16
530	  7	119.3	13.1	 16
531	  7	81.5	9.6	 16
532	  7	147.0	21.6	 16
533	  7	66.8	10.8	 16
534	  7	83.0	12.4	 16
535	  7	99.0	13.8	 16
536	  7	202.3	27.1	 16
537	  7	151.0	24.5	 16
538	  7	196.3	27.6	 16
539	  7	751.8	125.9	 16
540	  7	222.5	48.7	 16
541	  7	90.3	9.1	 16
542	  7	79.3	14.6	 16
543	  7	68.3	8.5	 16
544	  7	78.5	14.8	 16
545	  7	82.8	15.6	 16
546	  7	145.5	21.0	 16
547	  7	154.3	25.8	 16
548	  7	164.5	21.2	 16
549	  7	206.5	28.8	 16
550	  7	92.8	20.3	 16
551	  7	110.5	15.4	 16
552	  7	155.5	14.9	 16
553	  7	83.3	13.8	 16
554	  7	112.5	29.4	 16
555	  7	67.3	12.0	 16
556	  7	75.3	14.7	 16
557	  7	98.8	17.8	 16
558	  7	161.0	30.9	 16
559	  7	394.5	40.9	 16
560	  7	65.3	12.7	 16
561	  7	116.3	27.6	 16
562	  7	168.5	25.2	 16
563	  7	363.8	58.7	 16
564	  7	111.8	20.3	 16
565	  7	249.5	46.5	 12
566	  7	76.0	16.4	 16
567	  7	70.5	12.7	 16
568	  7	149.8	37.5	 16
569	  7	129.8	25.1	 16
570	  7	128.3	31.8	 16
571	  7	101.5	18.5	 16
572	  7	94.3	12.4	 16
573	  7	101.3	14.8	 16
574	  7	118.5	24.7	 16
575	  7	167.5	33.2	 16
576	  7	87.3	19.7	 16
577	  7	349.0	100.2	 16
578	  7	99.3	17.5	 16
579	  7	83.0	15.6	 16
580	  7	151.8	29.6	 16
581	  7	140.3	23.8	 16
582	  7	243.0	48.7	 16
583	  7	86.3	18.0	 16
584	  7	128.3	31.2	 16
585	  7	196.8	40.1	 20
586	  7	73.3	11.0	 16
587	  7	85.5	12.6	 16
588	  7	86.0	11.4	 16
589	  7	104.3	18.0	 16
590	  7	111.5	16.8	 16
591	  7	97.8	26.2	 16
592	  7	945.3	146.0	 16
593	  7	278.0	57.1	 16
594	  7	75.8	7.0	 16
595	  7	90.8	18.9	 16
596	  7	106.3	16.7	 16
597	  7	81.3	11.0	 16
598	  7	127.3	18.3	 16
599	  7	75.3	11.6	 16
600	  7	68.5	7.1	 16
601	  7	69.5	14.0	 16
602	  7	69.3	12.1	 16
603	  7	116.3	18.6	 16
604	  7	368.8	41.5	 16
605	  7	83.0	10.9	 16
606	  7	98.3	15.9	 16
607	  7	116.0	21.5	 16
608	  7	74.0	10.8	 16
609	  7	129.3	15.5	 16
610	  7	324.5	34.6	 16
611	  7	682.0	96.7	 16
612	  7	138.3	14.2	 16
613	  7	92.5	16.0	 16
614	  7	93.0	14.7	 16
615	  7	120.5	19.1	 16
616	  7	96.0	15.8	 16
617	  7	180.8	21.6	 16
618	  7	71.0	15.7	 16
619	  7	156.5	15.8	 16
620	  7	155.0	18.5	 16
621	  7	268.3	31.4	 16
622	  7	110.3	12.2	 16
623	  7	105.5	19.8	 16
624	  7	78.8	46.0	 16
625	  7	306.0	30.6	 16
626	  7	100.5	18.7	 16
627	  7	189.3	24.9	 16
628	  7	203.8	24.5	 16
629	  7	76.0	11.2	 16
630	  7	185.8	27.4	 16
631	  7	208.5	26.9	 16
632	  7	141.5	18.7	 16
633	  7	140.8	22.1	 16
634	  7	104.0	13.4	 16
635	  7	114.0	17.0	 16
636	  7	163.3	65.7	 16
637	  7	502.8	64.8	 16
638	  7	66.0	11.1	 16
639	  7	121.0	20.9	 16
640	  7	72.0	13.3	 16
641	  7	111.3	16.0	 16
642	  7	164.0	21.0	 16
643	  7	76.0	10.1	 16
644	  7	259.0	30.3	 16
645	  7	76.3	8.9	 16
646	  7	150.8	22.2	 16
647	  7	212.3	27.4	 16
648	  7	167.5	17.2	 16
649	  7	466.0	67.3	 16
650	  7	87.5	13.7	 16
651	  7	105.3	13.7	 16
652	  7	101.3	14.7	 16
653	  7	119.5	15.7	 16
654	  7	100.8	15.7	 16
655	  7	76.3	14.6	 16
656	  7	80.3	14.6	 16
657	  7	96.5	24.6	 16
658	  7	122.8	19.1	 16
659	  7	340.5	47.0	 16
660	  7	73.5	11.9	 16
661	  7	173.3	22.4	 16
662	  7	74.8	16.5	 16
663	  7	130.3	21.7	 16
664	  7	175.8	27.5	 16
665	  7	168.0	15.7	 16
666	  7	204.8	33.1	 16
667	  7	187.0	22.2	 16
668	  7	352.0	42.0	 16
669	  7	167.3	14.1	 16
670	  7	205.5	31.7	 16
671	  7	75.5	13.7	 16
672	  7	82.3	11.1	 16
673	  7	78.5	8.8	 16
674	  7	89.3	15.3	 16
675	  7	74.5	13.6	 16
676	  7	676.5	108.3	 16
677	  7	73.5	14.5	 16
678	  7	292.5	34.1	 16
679	  7	146.5	18.1	 16
680	  7	119.3	19.3	 16
681	  7	154.5	23.0	 16
682	  7	103.8	11.9	 16
683	  7	170.8	18.9	 16
684	  7	119.0	18.8	 16
685	  7	148.3	19.5	 16
686	  7	165.0	20.5	 16
687	  7	1610.5	254.7	 16
688	  7	173.8	23.1	 16
689	  7	128.5	20.3	 16
690	  7	121.0	17.0	 16
691	  7	136.8	17.1	 16
692	  7	153.5	17.6	 16
693	  7	267.8	40.9	 16
694	  7	103.0	17.3	 16
695	  7	80.8	11.8	 16
696	  7	75.3	23.8	 16
697	  7	81.3	12.3	 16
698	  7	75.3	12.1	 16
699	  7	174.3	31.5	 16
700	  7	119.3	15.8	 16
701	  7	88.3	12.8	 16
702	  7	110.5	17.8	 16
703	  7	91.3	16.9	 16
704	  7	84.3	11.0	 16
705	  7	77.5	10.7	 16
706	  7	176.3	23.3	 16
707	  7	170.0	22.2	 16
708	  7	88.3	12.8	 16
709	  7	128.0	22.3	 16
710	  7	133.0	21.6	 16
711	  7	129.0	17.3	 16
  0	  8	8197.0	1042.3	 16
  1	  8	119.5	23.9	 16
  2	  8	130.8	23.6	 16
  3	  8	185.8	23.5	 16
  4	  8	92.5	17.5	 16
  5	  8	88.8	19.9	 16
  6	  8	78.8	11.1	 16
  7	  8	79.0	8.6	 16
  8	  8	106.0	14.8	 16
  9	  8	375.5	29.2	 16
 10	  8	177.3	32.8	 16
 11	  8	77.5	13.4	 16
 12	  8	8032.0	624.5	 16
 13	  8	163.8	23.1	 16
 14	  8	146.3	20.8	 16
 15	  8	6537.5	876.6	 16
 16	  8	7590.3	469.1	 16
 17	  8	106.3	19.6	 16
 18	  8	8548.3	878.6	 16
 19	  8	163.8	15.8	 16
 20	  8	147.8	14.0	 16
 21	  8	150.0	22.1	 16
 22	  8	7622.8	1209.1	 16
 23	  8	116.3	17.9	 16
 24	  8	8701.3	379.3	 16
 25	  8	7799.5	673.9	 16
 26	  8	167.8	29.4	 16
 27	  8	145.5	23.1	 16
 28	  8	7245.3	723.0	 16
 29	  8	103.5	15.9	 16
 30	  8	8313.8	433.1	 16
 31	  8	182.5	26.2	 16
 32	  8	132.3	16.9	 16
 33	  8	141.3	17.3	 16
 34	  8	7302.5	601.2	 16
 35	  8	104.5	22.0	 16
 36	  8	8205.8	398.6	 16
 37	  8	144.5	23.9	 16
 38	  8	132.0	18.6	 16
 39	  8	140.0	16.8	 16
 40	  8	146.3	19.6	 16
 41	  8	159.8	32.8	 16
 42	  8	8679.3	453.8	 16
 43	  8	8032.0	681.1	 16
 44	  8	155.3	26.6	 16
 45	  8	122.8	16.5	 16
 46	  8	7270.5	456.7	 16
 47	  8	98.3	17.8	 16
 48	  8	119.5	16.2	 16
 49	  8	125.5	18.8	 16
 50	  8	140.3	21.7	 16
 51	  8	142.0	20.7	 16
 52	  8	118.3	14.4	 16
 53	  8	89.0	11.9	 16
 54	  8	8067.3	445.8	 16
 55	  8	166.0	25.7	 16
 56	  8	145.5	20.4	 16
 57	  8	6361.0	670.7	 16
 58	  8	134.3	21.0	 16
 59	  8	80.0	12.5	 16
 60	  8	84.5	10.3	 16
 61	  8	87.0	11.4	 16
 62	  8	8995.8	473.2	 16
 63	  8	8044.5	1201.3	 16
 64	  8	7407.8	863.8	 16
 65	  8	7096.8	674.7	 16
 66	  8	7906.8	240.9	 16
 67	  8	145.8	32.9	 16
 68	  8	8459.0	550.9	 16
 69	  8	150.0	29.9	 16
 70	  8	149.0	27.3	 20
 71	  8	6339.8	903.5	 16
 72	  8	7213.8	1743.9	 16
 73	  8	111.8	23.5	 16
 74	  8	129.3	26.2	 16
 75	  8	6663.5	418.2	 16
 76	  8	6417.5	494.6	 16
 77	  8	5897.0	1332.0	 16
 78	  8	118.5	19.4	 16
 79	  8	91.5	12.6	 16
 80	  8	7703.8	1586.2	 16
 81	  8	142.3	23.7	 16
 82	  8	138.3	18.1	 16
 83	  8	139.8	20.9	 16
 84	  8	7133.5	1412.0	 16
 85	  8	86.5	14.6	 16
 86	  8	117.0	16.3	 16
 87	  8	131.0	39.1	 16
 88	  8	6425.0	1097.9	 16
 89	  8	122.5	11.9	 16
 90	  8	119.8	15.1	 16
 91	  8	72.8	15.3	 16
 92	  8	129.0	13.3	 16
 93	  8	6673.5	453.0	 16
 94	  8	6543.3	1119.6	 16
 95	  8	157.5	21.8	 16
 96	  8	120.8	25.5	 16
 97	  8	82.5	12.3	 16
 98	  8	134.0	23.4	 16
 99	  8	6643.8	633.9	 16
100	  8	6421.5	1053.2	 16
101	  8	133.3	19.7	 16
102	  8	118.3	17.8	 16
103	  8	77.8	10.5	 16
104	  8	129.3	21.6	 16
105	  8	7519.8	1291.4	 16
106	  8	7352.8	1085.5	 16
107	  8	7321.0	1448.7	 16
108	  8	154.5	25.4	 16
109	  8	68.0	11.7	 16
110	  8	75.5	16.3	 16
111	  8	85.0	13.9	 16
112	  8	112.8	12.5	 16
113	  8	202.3	41.7	 16
114	  8	90.3	12.0	 16
115	  8	89.5	9.9	 16
116	  8	137.3	23.0	 16
117	  8	172.5	23.7	 16
118	  8	106.3	18.1	 16
119	  8	188.3	23.3	 16
120	  8	204.5	26.2	 16
121	  8	295.0	33.2	 16
122	  8	177.0	27.8	 16
123	  8	148.0	25.3	 16
124	  8	123.5	22.0	 16
125	  8	610.8	57.7	 16
126	  8	1201.0	162.6	 16
127	  8	1412.3	147.8	 16
128	  8	1342.8	329.9	 16
129	  8	120.5	23.3	 16
130	  8	82.5	15.4	 16
131	  8	379.3	53.4	 16
132	  8	85.5	13.3	 16
133	  8	260.0	29.1	 16
134	  8	1922.5	138.5	 16
135	  8	685.0	49.3	 16
136	  8	210.3	29.8	 16
137	  8	123.3	17.6	 16
138	  8	119.8	16.2	 16
139	  8	98.8	14.8	 16
140	  8	73.0	10.0	 16
141	  8	88.5	15.2	 16
142	  8	89.5	16.2	 16
143	  8	102.8	17.0	 16
144	  8	92.3	15.5	 16
145	  8	140.5	17.4	 16
146	  8	75.3	12.8	 16
147	  8	89.5	10.8	 16
148	  8	75.3	11.0	 16
149	  8	73.5	10.4	 16
150	  8	79.3	12.3	 16
151	  8	91.5	14.2	 16
152	  8	88.0	13.6	 16
153	  8	92.5	13.2	 16
154	  8	135.0	21.8	 16
155	  8	90.0	14.8	 16
156	  8	376.3	45.2	 16
157	  8	407.8	35.2	 16
158	  8	147.3	20.7	 16
159	  8	292.5	113.1	 16
160	  8	167.8	30.4	 16
161	  8	76.0	14.6	 16
162	  8	165.3	27.6	 16
163	  8	123.3	15.1	 16
164	  8	106.3	20.4	 16
165	  8	120.3	22.7	 16
166	  8	78.5	16.6	 16
167	  8	75.0	16.4	 16
168	  8	95.8	15.0	 16
169	  8	104.0	18.1	 16
170	  8	88.3	8.7	 16
171	  8	97.3	13.2	 16
172	  8	78.0	12.6	 16
173	  8	91.3	15.1	 16
174	  8	114.5	18.7	 16
175	  8	88.5	12.2	 16
176	  8	74.8	11.2	 16
177	  8	89.3	13.2	 16
178	  8	89.8	17.9	 16
179	  8	92.8	13.5	 16
180	  8	198.0	25.9	 16
181	  8	85.3	10.8	 16
182	  8	104.0	17.8	 16
183	  8	73.5	12.2	 16
184	  8	62.3	8.1	 16
185	  8	98.8	18.1	 16
186	  8	118.3	18.0	 16
187	  8	67.0	9.1	 16
188	  8	103.0	21.2	 16
189	  8	156.5	20.4	 16
190	  8	101.8	15.1	 16
191	  8	96.3	14.5	 16
192	  8	82.3	10.9	 16
193	  8	95.8	17.9	 16
194	  8	149.0	20.3	 16
195	  8	87.5	8.7	 16
196	  8	86.0	16.0	 16
197	  8	104.8	17.1	 16
198	  8	116.3	15.3	 16
199	  8	167.5	21.3	 16
200	  8	136.0	14.3	 16
201	  8	93.0	13.3	 16
202	  8	106.0	13.9	 16
203	  8	80.0	13.7	 16
204	  8	88.3	12.1	 16
205	  8	71.5	8.3	 16
206	  8	84.5	14.3	 16
207	  8	76.3	15.0	 16
208	  8	74.8	13.4	 16
209	  8	74.8	13.8	 16
210	  8	89.0	20.7	 16
211	  8	164.8	22.4	 16
212	  8	78.3	16.4	 16
213	  8	110.3	19.3	 16
214	  8	104.0	11.0	 16
215	  8	83.5	11.5	 16
216	  8	81.8	14.7	 16
217	  8	89.3	14.1	 16
218	  8	85.8	15.5	 16
219	  8	64.0	8.9	 16
220	  8	84.0	11.8	 16
221	  8	98.8	15.0	 16
222	  8	97.5	15.3	 16
223	  8	85.0	14.3	 16
224	  8	77.3	18.3	 16
225	  8	136.3	20.9	 16
226	  8	153.3	19.8	 16
227	  8	150.3	18.4	 16
228	  8	146.0	14.3	 16
229	  8	72.0	11.9	 16
230	  8	81.3	10.3	 16
231	  8	94.3	15.7	 16
232	  8	72.8	8.1	 16
233	  8	103.5	18.3	 16
234	  8	83.0	17.7	 16
235	  8	89.5	9.9	 16
236	  8	113.8	16.1	 16
237	  8	73.8	12.5	 16
238	  8	74.3	14.7	 16
239	  8	182.3	29.0	 16
240	  8	72.3	8.3	 16
241	  8	116.3	16.6	 16
242	  8	105.5	18.0	 16
243	  8	112.8	16.4	 16
244	  8	93.0	19.5	 16
245	  8	73.5	9.4	 16
246	  8	76.5	13.9	 16
247	  8	84.3	13.4	 16
248	  8	71.3	11.5	 20
249	  8	87.8	15.5	 16
250	  8	87.8	18.0	 16
251	  8	213.8	24.6	 16
252	  8	213.8	30.2	 16
253	  8	72.3	11.7	 16
254	  8	79.5	16.9	 16
255	  8	89.3	19.2	 16
256	  8	77.0	11.0	 16
257	  8	131.3	20.3	 16
258	  8	69.3	15.4	 16
259	  8	111.5	18.6	 16
260	  8	97.5	11.6	 16
261	  8	131.5	18.9	 16
262	  8	79.8	15.0	 16
263	  8	819.8	104.3	 16
264	  8	93.8	19.7	 16
265	  8	85.0	12.4	 16
266	  8	74.3	12.8	 16
267	  8	111.3	15.5	 16
268	  8	166.3	25.7	 16
269	  8	73.0	14.1	 16
270	  8	78.3	12.3	 16
271	  8	228.8	25.7	 16
272	  8	218.3	34.1	 16
273	  8	71.3	12.4	 16
274	  8	77.0	13.3	 16
275	  8	100.8	18.8	 16
276	  8	245.3	31.7	 16
277	  8	169.3	18.9	 16
278	  8	117.5	17.5	 16
279	  8	85.0	13.6	 16
280	  8	88.8	14.8	 16
281	  8	94.0	14.2	 16
282	  8	281.8	53.1	 16
283	  8	116.5	22.4	 16
284	  8	75.3	13.4	 16
285	  8	78.5	13.8	 16
286	  8	84.0	13.1	 16
287	  8	96.5	14.6	 16
288	  8	118.0	24.9	 16
289	  8	198.5	28.7	 16
290	  8	165.0	20.2	 16
291	  8	111.8	16.6	 16
292	  8	83.0	17.6	 16
293	  8	164.8	17.2	 16
294	  8	120.8	20.0	 16
295	  8	131.3	19.7	 16
296	  8	111.3	11.8	 16
297	  8	95.5	14.4	 16
298	  8	200.0	19.7	 16
299	  8	198.5	32.5	 16
300	  8	207.5	19.6	 16
301	  8	146.5	18.3	 16
302	  8	69.5	13.9	 16
303	  8	92.0	16.6	 16
304	  8	84.0	11.1	 16
305	  8	100.3	19.3	 16
306	  8	281.3	34.6	 16
307	  8	88.5	13.4	 16
308	  8	104.0	12.1	 16
309	  8	99.5	18.5	 16
310	  8	115.5	18.9	 16
311	  8	199.3	23.8	 16
312	  8	83.0	12.4	 16
313	  8	230.3	35.8	 16
314	  8	249.5	42.0	 16
315	  8	125.8	22.9	 16
316	  8	136.3	20.1	 16
317	  8	85.8	12.7	 16
318	  8	81.3	9.5	 16
319	  8	94.3	16.2	 16
320	  8	69.3	12.1	 16
321	  8	187.8	22.6	 16
322	  8	110.0	27.0	 16
323	  8	107.3	49.6	 16
324	  8	154.0	22.8	 16
325	  8	157.0	17.5	 16
326	  8	441.5	52.6	 16
327	  8	112.0	17.5	 16
328	  8	90.8	13.6	 16
329	  8	159.5	15.4	 16
330	  8	456.8	45.9	 16
331	  8	126.3	20.5	 16
332	  8	90.8	10.5	 16
333	  8	1672.8	204.8	 16
334	  8	1906.5	247.4	 16
335	  8	113.3	16.0	 16
336	  8	85.0	7.6	 16
337	  8	85.0	16.5	 16
338	  8	91.8	15.7	 16
339	  8	78.3	11.8	 16
340	  8	113.5	10.0	 16
341	  8	77.0	10.5	 16
342	  8	92.3	14.3	 16
343	  8	74.3	8.9	 16
344	  8	108.0	14.9	 16
345	  8	96.8	14.2	 16
346	  8	162.0	19.0	 16
347	  8	571.8	50.0	 16
348	  8	148.5	20.4	 16
349	  8	92.5	13.8	 16
350	  8	83.3	10.7	 16
351	  8	84.3	13.5	 16
352	  8	136.5	18.4	 16
353	  8	77.3	13.4	 16
354	  8	80.8	11.2	 16
355	  8	145.5	17.5	 16
356	  8	110.3	18.7	 16
357	  8	163.3	23.9	 16
358	  8	653.5	63.8	 16
359	  8	168.0	23.0	 16
360	  8	103.8	17.6	 16
361	  8	68.5	11.2	 16
362	  8	77.8	11.6	 16
363	  8	86.0	15.1	 16
364	  8	63.0	15.1	 16
365	  8	83.0	15.3	 16
366	  8	138.3	19.9	 16
367	  8	112.0	11.6	 16
368	  8	87.5	14.4	 16
369	  8	124.3	20.7	 16
370	  8	117.3	18.4	 16
371	  8	114.3	18.7	 16
372	  8	156.3	21.9	 16
373	  8	141.5	22.9	 16
374	  8	80.0	15.3	 16
375	  8	70.3	11.1	 16
376	  8	65.3	9.4	 16
377	  8	92.0	17.9	 16
378	  8	183.8	19.7	 16
379	  8	128.5	18.7	 16
380	  8	139.0	20.8	 16
381	  8	91.5	13.4	 16
382	  8	106.0	18.4	 16
383	  8	600.5	88.7	 16
384	  8	267.5	42.5	 16
385	  8	139.8	15.7	 16
386	  8	108.3	14.0	 16
387	  8	130.0	20.1	 16
388	  8	179.5	21.2	 16
389	  8	66.3	13.2	 16
390	  8	76.8	9.8	 16
391	  8	75.0	8.8	 16
392	  8	76.3	13.3	 16
393	  8	71.5	11.2	 16
394	  8	160.3	26.2	 16
395	  8	226.8	22.4	 16
396	  8	261.3	37.1	 16
397	  8	298.8	32.2	 16
398	  8	87.5	19.6	 16
399	  8	81.3	13.0	 16
400	  8	93.8	12.9	 16
401	  8	343.5	49.0	 16
402	  8	78.0	14.7	 16
403	  8	89.0	17.8	 16
404	  8	91.5	15.6	 16
405	  8	58.3	11.1	 16
406	  8	124.5	28.0	 16
407	  8	67.8	12.3	 16
408	  8	75.8	13.9	 16
409	  8	115.3	42.9	 16
410	  8	80.3	11.9	 16
411	  8	176.5	25.9	 16
412	  8	147.8	17.2	 16
413	  8	152.0	16.9	 16
414	  8	70.8	12.3	 16
415	  8	150.3	32.0	 16
416	  8	70.0	14.7	 16
417	  8	75.3	12.3	 16
418	  8	99.3	22.3	 16
419	  8	78.8	30.1	 16
420	  8	67.0	12.2	 16
421	  8	74.5	15.2	 16
422	  8	89.8	16.0	 16
423	  8	110.0	29.5	 16
424	  8	331.0	58.9	 16
425	  8	118.8	20.3	 16
426	  8	354.8	49.7	 20
427	  8	95.5	13.0	 16
428	  8	65.5	11.0	 16
429	  8	78.3	11.0	 16
430	  8	97.3	11.6	 16
431	  8	94.5	15.1	 16
432	  8	82.8	14.3	 16
433	  8	67.3	12.8	 16
434	  8	105.3	17.8	 16
435	  8	141.0	157.6	 16
436	  8	97.0	17.6	 16
437	  8	128.5	23.5	 16
438	  8	195.5	18.1	 16
439	  8	91.0	15.6	 16
440	  8	85.3	11.5	 16
441	  8	92.3	14.8	 16
442	  8	87.8	15.5	 16
443	  8	124.3	21.2	 16
444	  8	106.3	15.2	 16
445	  8	83.5	14.4	 16
446	  8	96.5	15.8	 16
447	  8	132.0	24.5	 16
448	  8	182.3	32.4	 16
449	  8	1285.0	162.5	 16
450	  8	200.3	22.1	 16
451	  8	76.0	12.6	 16
452	  8	163.3	16.6	 16
453	  8	140.5	19.7	 16
454	  8	275.8	31.3	 16
455	  8	113.8	19.5	 16
456	  8	121.0	24.1	 16
457	  8	73.3	11.5	 16
458	  8	68.3	11.0	 16
459	  8	88.5	15.1	 16
460	  8	175.0	20.3	 16
461	  8	76.5	13.7	 16
462	  8	110.3	24.0	 16
463	  8	82.3	10.2	 16
464	  8	68.0	7.0	 16
465	  8	82.5	12.0	 16
466	  8	72.8	16.9	 16
467	  8	120.8	19.5	 16
468	  8	84.0	14.6	 16
469	  8	90.8	17.1	 16
470	  8	107.0	22.1	 16
471	  8	60.5	12.4	 16
472	  8	88.5	10.9	 16
473	  8	139.3	21.5	 16
474	  8	74.0	14.3	 16
475	  8	80.3	15.5	 16
476	  8	75.5	11.1	 16
477	  8	78.3	12.0	 16
478	  8	101.0	56.6	 16
479	  8	74.0	13.1	 16
480	  8	59.0	10.6	 16
481	  8	72.5	12.2	 16
482	  8	71.3	11.3	 16
483	  8	143.8	45.8	 16
484	  8	149.8	16.7	 16
485	  8	209.8	28.8	 16
486	  8	159.8	22.4	 16
487	  8	179.3	22.1	 16
488	  8	172.0	21.2	 16
489	  8	84.3	15.2	 16
490	  8	102.3	13.0	 16
491	  8	73.5	10.7	 16
492	  8	71.8	9.8	 16
493	  8	187.0	28.7	 16
494	  8	139.3	26.1	 16
495	  8	226.3	41.4	 16
496	  8	88.3	12.5	 16
497	  8	102.0	15.6	 16
498	  8	90.8	9.2	 12
499	  8	100.3	19.3	 16
500	  8	88.3	14.6	 16
501	  8	122.8	42.7	 16
502	  8	162.8	27.9	 16
503	  8	169.5	20.3	 16
504	  8	121.0	16.1	 16
505	  8	97.8	14.8	 16
506	  8	134.5	25.7	 16
507	  8	124.8	15.5	 16
508	  8	83.5	14.7	 16
509	  8	115.0	24.4	 16
510	  8	108.0	17.4	 16
511	  8	90.5	8.7	 16
512	  8	90.3	15.6	 16
513	  8	74.0	11.8	 16
514	  8	61.3	10.4	 16
515	  8	63.5	12.0	 16
516	  8	72.5	9.7	 16
517	  8	101.3	14.5	 16
518	  8	115.5	18.4	 16
519	  8	244.3	15.0	 16
520	  8	138.5	21.9	 16
521	  8	86.3	16.4	 16
522	  8	102.0	18.9	 16
523	  8	101.3	13.2	 16
524	  8	110.3	15.2	 16
525	  8	70.3	10.8	 16
526	  8	67.0	11.0	 16
527	  8	78.8	10.1	 16
528	  8	89.5	17.3	 16
529	  8	78.3	13.0	 16
530	  8	130.3	25.4	 16
531	  8	358.0	49.3	 16
532	  8	138.8	25.4	 16
533	  8	87.0	30.2	 16
534	  8	72.3	14.3	 16
535	  8	85.8	13.9	 16
536	  8	74.3	10.5	 16
537	  8	90.5	8.5	 16
538	  8	266.8	26.2	 16
539	  8	363.3	43.5	 16
540	  8	199.5	36.0	 16
541	  8	100.3	17.0	 16
542	  8	64.3	8.4	 16
543	  8	74.5	14.1	 16
544	  8	79.3	15.4	 16
545	  8	67.0	10.2	 16
546	  8	87.5	16.5	 16
547	  8	80.3	14.0	 16
548	  8	142.0	20.5	 16
549	  8	116.3	17.8	 16
550	  8	98.3	17.7	 16
551	  8	113.0	14.2	 16
552	  8	163.5	26.1	 16
553	  8	104.3	12.5	 16
554	  8	69.3	11.6	 16
555	  8	75.0	13.3	 16
556	  8	78.0	14.4	 16
557	  8	65.8	7.1	 16
558	  8	151.8	37.2	 16
559	  8	298.3	51.7	 16
560	  8	59.5	11.4	 16
561	  8	98.8	18.7	 16
562	  8	112.3	12.9	 16
563	  8	647.0	84.9	 16
564	  8	106.5	14.7	 16
565	  8	98.5	19.9	 16
566	  8	86.0	33.6	 16
567	  8	72.0	13.9	 16
568	  8	86.3	11.7	 16
569	  8	122.8	19.9	 16
570	  8	127.8	26.9	 16
571	  8	85.8	14.9	 16
572	  8	88.8	13.8	 16
573	  8	111.3	15.9	 16
574	  8	102.0	18.1	 16
575	  8	84.5	13.2	 16
576	  8	84.8	16.7	 16
577	  8	81.5	16.0	 16
578	  8	62.3	9.0	 16
579	  8	66.0	9.1	 16
580	  8	78.5	15.8	 16
581	  8	97.0	15.4	 16
582	  8	104.8	20.7	 16
583	  8	72.3	10.4	 16
584	  8	81.8	16.3	 16
585	  8	103.3	20.4	 16
586	  8	65.0	10.0	 16
587	  8	71.0	11.9	 16
588	  8	61.3	10.7	 16
589	  8	96.0	18.1	 16
590	  8	110.5	16.5	 16
591	  8	94.3	19.1	 16
592	  8	153.8	48.4	 16
593	  8	104.0	19.8	 16
594	  8	81.5	12.2	 16
595	  8	77.0	11.0	 16
596	  8	151.8	29.4	 16
597	  8	82.0	19.0	 16
598	  8	117.3	15.1	 16
599	  8	80.0	14.6	 16
600	  8	67.3	11.7	 16
601	  8	80.0	41.1	 16
602	  8	71.8	11.8	 16
603	  8	101.0	17.3	 16
604	  8	139.3	20.1	 20
605	  8	92.0	15.2	 16
606	  8	62.3	8.8	 16
607	  8	86.5	14.5	 16
608	  8	66.3	10.3	 16
609	  8	108.5	13.9	 16
610	  8	72.5	10.4	 16
611	  8	116.5	20.7	 16
612	  8	108.5	14.1	 16
613	  8	73.5	11.3	 16
614	  8	86.3	15.8	 16
615	  8	145.5	23.8	 16
616	  8	100.3	15.0	 16
617	  8	199.5	24.9	 16
618	  8	71.8	15.2	 16
619	  8	114.3	15.2	 16
620	  8	70.3	12.3	 16
621	  8	146.5	16.5	 16
622	  8	83.0	17.8	 16
623	  8	102.3	16.3	 16
624	  8	78.3	32.3	 16
625	  8	128.3	25.4	 16
626	  8	89.3	17.8	 16
627	  8	260.3	24.8	 16
628	  8	153.3	23.0	 16
629	  8	70.0	16.7	 16
630	  8	144.8	21.7	 16
631	  8	191.5	22.1	 16
632	  8	98.8	17.4	 16
633	  8	97.8	17.7	 16
634	  8	125.3	18.8	 16
635	  8	89.3	19.1	 16
636	  8	84.3	15.8	 16
637	  8	95.5	10.2	 16
638	  8	76.0	12.6	 16
639	  8	62.5	10.4	 16
640	  8	75.0	14.3	 16
641	  8	73.8	14.4	 16
642	  8	122.8	14.4	 16
643	  8	72.0	13.0	 16
644	  8	212.5	23.9	 16
645	  8	80.5	13.9	 16
646	  8	169.5	15.4	 16
647	  8	158.3	24.0	 16
648	  8	158.5	21.9	 16
649	  8	124.0	23.2	 16
650	  8	72.5	15.1	 16
651	  8	61.0	6.9	 16
652	  8	82.3	11.7	 16
653	  8	82.8	14.1	 16
654	  8	74.0	8.4	 16
655	  8	73.3	15.0	 16
656	  8	58.5	11.2	 16
657	  8	84.5	15.4	 16
658	  8	76.3	11.3	 16
659	  8	172.0	17.4	 16
660	  8	75.5	13.3	 16
661	  8	88.8	10.9	 16
662	  8	82.5	11.2	 16
663	  8	73.5	14.3	 16
664	  8	114.8	19.4	 16
665	  8	199.5	22.3	 16
666	  8	185.3	26.6	 16
667	  8	206.0	22.6	 16
668	  8	123.0	28.5	 16
669	  8	148.8	18.2	 16
670	  8	157.5	18.3	 16
671	  8	73.0	13.3	 16
672	  8	77.3	14.2	 16
673	  8	80.3	11.9	 16
674	  8	78.3	11.2	 16
675	  8	79.0	12.3	 16
676	  8	106.0	11.6	 16
677	  8	68.3	9.0	 16
678	  8	224.8	29.0	 16
679	  8	87.3	10.2	 16
680	  8	92.5	15.1	 16
681	  8	122.0	15.2	 16
682	  8	109.0	13.7	 16
683	  8	230.0	40.2	 16
684	  8	121.0	21.5	 16
685	  8	135.8	18.1	 16
686	  8	134.3	17.2	 16
687	  8	438.0	72.8	 16
688	  8	127.5	16.4	 16
689	  8	99.3	13.0	 16
690	  8	136.5	20.7	 16
691	  8	147.0	12.8	 16
692	  8	152.3	23.4	 16
693	  8	88.8	16.0	 16
694	  8	74.5	13.8	 16
695	  8	79.3	11.4	 16
696	  8	72.3	11.9	 16
697	  8	68.3	9.4	 16
698	  8	79.5	14.8	 16
699	  8	78.5	20.0	 16
700	  8	98.0	21.6	 16
701	  8	75.5	11.4	 16
702	  8	113.8	31.2	 16
703	  8	74.3	9.2	 16
704	  8	80.0	15.2	 16
705	  8	85.0	16.5	 16
706	  8	178.3	17.9	 16
707	  8	135.3	27.2	 16
708	  8	107.5	22.3	 16
709	  8	140.5	24.0	 16
710	  8	81.0	15.6	 16
711	  8	283.5	63.6	 16
  0	  9	105.5	13.6	 16
  1	  9	188.3	27.9	 16
  2	  9	114.3	11.8	 16
  3	  9	97.8	17.6	 16
  4	  9	83.8	12.4	 16
  5	  9	78.3	12.9	 16
  6	  9	635.8	83.4	 16
  7	  9	78.0	13.6	 16
  8	  9	84.8	13.1	 16
  9	  9	78.5	7.8	 16
 10	  9	176.0	15.2	 16
 11	  9	82.8	16.8	 16
 12	  9	7873.0	496.5	 16
 13	  9	128.0	17.8	 16
 14	  9	130.0	20.3	 16
 15	  9	157.3	20.7	 16
 16	  9	12178.3	11751.5	 16
 17	  9	95.0	21.2	 16
 18	  9	9143.8	425.8	 16
 19	  9	8551.0	863.2	 16
 20	  9	8062.3	1068.3	 16
 21	  9	7662.5	1493.9	 16
 22	  9	146.8	21.9	 16
 23	  9	85.3	14.8	 16
 24	  9	8503.8	608.3	 16
 25	  9	158.3	21.2	 16
 26	  9	136.8	17.7	 16
 27	  9	139.0	21.0	 16
 28	  9	7334.8	465.9	 16
 29	  9	116.5	22.9	 16
 30	  9	9053.5	435.6	 16
 31	  9	8480.3	945.0	 16
 32	  9	8166.3	792.5	 16
 33	  9	7580.8	729.1	 16
 34	  9	156.5	23.1	 16
 35	  9	84.5	13.4	 16
 36	  9	8229.0	534.7	 16
 37	  9	139.3	18.1	 16
 38	  9	130.8	20.3	 16
 39	  9	124.3	11.7	 16
 40	  9	168.0	25.5	 16
 41	  9	301.5	75.8	 16
 42	  9	8563.0	501.0	 16
 43	  9	240.8	50.9	 16
 44	  9	134.5	17.7	 16
 45	  9	143.0	22.5	 16
 46	  9	7468.8	591.0	 16
 47	  9	92.5	13.2	 16
 48	  9	131.8	21.2	 16
 49	  9	131.3	15.3	 16
 50	  9	6217.5	632.9	 16
 51	  9	131.5	13.9	 16
 52	  9	122.0	11.8	 16
 53	  9	78.5	10.0	 16
 54	  9	8278.0	415.8	 16
 55	  9	8060.8	1253.3	 16
 56	  9	7376.0	1047.3	 16
 57	  9	130.0	12.8	 16
 58	  9	119.5	20.8	 16
 59	  9	82.5	17.2	 16
 60	  9	86.8	10.5	 16
 61	  9	81.0	11.9	 16
 62	  9	8822.3	502.6	 16
 63	  9	138.8	16.8	 16
 64	  9	115.8	17.2	 16
 65	  9	154.5	24.2	 16
 66	  9	7620.8	541.5	 16
 67	  9	96.0	13.1	 16
 68	  9	8396.8	501.7	 16
 69	  9	146.8	21.1	 16
 70	  9	130.3	18.3	 16
 71	  9	122.5	15.3	 16
 72	  9	7157.0	522.2	 16
 73	  9	93.8	17.8	 16
 74	  9	112.5	12.3	 16
 75	  9	117.3	15.7	 16
 76	  9	125.5	46.6	 16
 77	  9	119.3	19.9	 16
 78	  9	141.0	30.1	 16
 79	  9	74.0	12.1	 16
 80	  9	7548.0	570.0	 16
 81	  9	141.5	20.8	 16
 82	  9	118.3	14.2	 16
 83	  9	119.8	16.6	 16
 84	  9	7149.0	847.1	 16
 85	  9	99.3	19.3	 16
 86	  9	110.8	11.4	 16
 87	  9	115.8	25.9	 16
 88	  9	6528.3	743.3	 16
 89	  9	153.5	31.4	 20
 90	  9	125.3	20.1	 16
 91	  9	87.0	22.5	 16
 92	  9	127.8	27.6	 16
 93	  9	137.5	74.1	 16
 94	  9	129.3	15.8	 16
 95	  9	6414.5	1303.5	 16
 96	  9	129.3	26.1	 16
 97	  9	78.3	18.3	 16
 98	  9	120.0	18.8	 16
 99	  9	133.3	21.2	 16
100	  9	143.0	19.0	 16
101	  9	6728.3	1306.2	 16
102	  9	118.5	18.8	 16
103	  9	91.3	22.5	 16
104	  9	7412.0	1526.2	 16
105	  9	147.3	24.8	 16
106	  9	118.3	14.3	 16
107	  9	129.5	13.6	 16
108	  9	7222.5	1402.6	 16
109	  9	84.5	12.5	 16
110	  9	64.5	14.2	 16
111	  9	482.5	81.7	 16
112	  9	1508.5	266.5	 16
113	  9	469.5	61.0	 16
114	  9	244.3	26.7	 16
115	  9	108.5	14.6	 16
116	  9	81.3	15.7	 16
117	  9	85.8	22.1	 16
118	  9	96.5	25.3	 16
119	  9	129.3	19.0	 16
120	  9	233.3	48.3	 16
121	  9	106.0	20.7	 16
122	  9	90.0	11.0	 16
123	  9	98.5	17.1	 16
124	  9	309.3	46.7	 16
125	  9	89.5	13.6	 16
126	  9	89.3	13.3	 16
127	  9	325.0	68.8	 16
128	  9	75.5	14.6	 16
129	  9	110.8	19.2	 16
130	  9	98.5	15.8	 16
131	  9	154.3	23.0	 16
132	  9	274.5	46.9	 16
133	  9	98.3	11.5	 16
134	  9	442.3	60.3	 16
135	  9	72.0	13.8	 16
136	  9	94.3	10.6	 16
137	  9	73.5	13.2	 16
138	  9	73.8	13.1	 16
139	  9	85.0	10.1	 16
140	  9	91.8	15.7	 16
141	  9	242.0	36.9	 16
142	  9	165.3	26.7	 16
143	  9	422.3	30.9	 16
144	  9	103.3	18.4	 16
145	  9	127.0	18.7	 16
146	  9	131.5	16.9	 16
147	  9	79.3	15.8	 16
148	  9	93.3	12.8	 16
149	  9	84.3	14.2	 16
150	  9	263.3	28.3	 16
151	  9	101.5	25.9	 16
152	  9	5376.0	885.2	 16
153	  9	1204.3	6168.0	 16
154	  9	196.3	27.2	 16
155	  9	1100.0	123.0	 16
156	  9	314.8	30.5	 16
157	  9	620.8	56.4	 16
158	  9	137.5	31.5	 16
159	  9	275.0	84.0	 16
160	  9	581.0	52.5	 16
161	  9	73.8	11.6	 16
162	  9	79.0	17.5	 16
163	  9	94.0	14.9	 16
164	  9	142.8	25.3	 16
165	  9	278.0	27.5	 16
166	  9	162.3	33.3	 16
167	  9	103.0	10.5	 16
168	  9	146.0	62.3	 16
169	  9	414.0	49.0	 16
170	  9	1977.8	305.0	 16
171	  9	80.0	13.1	 16
172	  9	120.5	18.6	 16
173	  9	170.3	22.6	 16
174	  9	270.8	29.1	 16
175	  9	169.3	14.8	 16
176	  9	109.3	21.0	 16
177	  9	82.3	12.7	 16
178	  9	65.5	11.9	 16
179	  9	108.3	18.1	 16
180	  9	76.5	10.5	 16
181	  9	79.3	10.9	 16
182	  9	71.5	11.9	 16
183	  9	77.0	14.4	 16
184	  9	95.0	18.0	 16
185	  9	71.3	12.3	 16
186	  9	81.3	16.7	 16
187	  9	86.3	11.7	 16
188	  9	74.3	13.6	 16
189	  9	78.8	17.8	 16
190	  9	78.0	17.4	 16
191	  9	473.5	64.0	 16
192	  9	302.0	29.8	 16
193	  9	134.0	22.4	 16
194	  9	68.0	13.0	 16
195	  9	195.0	33.6	 16
196	  9	87.0	16.2	 16
197	  9	89.3	12.6	 16
198	  9	156.0	21.6	 16
199	  9	135.3	49.9	 16
200	  9	79.3	12.6	 16
201	  9	1170.0	116.4	 16
202	  9	85.5	14.1	 16
203	  9	81.8	10.6	 16
204	  9	102.3	15.8	 16
205	  9	231.3	24.4	 16
206	  9	352.5	34.3	 16
207	  9	98.3	21.5	 16
208	  9	102.0	14.8	 16
209	  9	76.3	13.2	 16
210	  9	206.3	33.9	 16
211	  9	101.0	16.4	 16
212	  9	353.5	31.6	 16
213	  9	195.3	18.4	 16
214	  9	161.8	15.1	 16
215	  9	113.3	19.1	 16
216	  9	128.3	22.7	 16
217	  9	84.3	15.1	 16
218	  9	83.0	11.5	 16
219	  9	67.5	11.5	 16
220	  9	158.3	28.5	 16
221	  9	116.3	22.6	 16
222	  9	124.0	18.3	 16
223	  9	166.5	18.1	 16
224	  9	128.3	17.9	 16
225	  9	134.0	19.0	 16
226	  9	82.3	15.8	 16
227	  9	121.8	25.2	 16
228	  9	75.0	11.4	 16
229	  9	213.8	36.9	 16
230	  9	105.3	14.2	 16
231	  9	658.0	55.6	 16
232	  9	115.5	17.5	 16
233	  9	374.5	39.3	 16
234	  9	86.0	16.3	 16
235	  9	370.0	47.9	 16
236	  9	149.3	26.1	 16
237	  9	156.5	22.1	 16
238	  9	586.5	93.6	 16
239	  9	108.5	25.4	 16
240	  9	259.3	38.7	 16
241	  9	106.0	19.6	 16
242	  9	79.0	10.1	 16
243	  9	84.3	10.9	 16
244	  9	91.3	14.9	 16
245	  9	135.3	21.6	 16
246	  9	74.3	16.5	 16
247	  9	4141.5	534.2	 16
248	  9	126.0	15.2	 16
249	  9	152.0	20.7	 16
250	  9	157.5	31.3	 16
251	  9	183.8	31.0	 16
252	  9	326.0	36.7	 16
253	  9	244.3	21.3	 16
254	  9	151.5	23.7	 16
255	  9	66.0	14.2	 16
256	  9	104.3	19.6	 16
257	  9	89.0	16.9	 16
258	  9	591.5	102.2	 16
259	  9	141.5	16.8	 16
260	  9	139.8	20.7	 16
261	  9	133.5	21.3	 16
262	  9	165.5	29.0	 16
263	  9	89.3	14.3	 16
264	  9	92.0	34.8	 16
265	  9	64.8	12.9	 16
266	  9	262.8	46.1	 16
267	  9	322.3	38.8	 20
268	  9	108.8	15.5	 16
269	  9	383.0	46.3	 16
270	  9	70.3	9.5	 16
271	  9	67.0	8.6	 16
272	  9	71.0	11.8	 16
273	  9	81.0	14.9	 16
274	  9	99.0	10.1	 16
275	  9	123.0	21.1	 16
276	  9	72.5	17.2	 16
277	  9	72.8	10.9	 16
278	  9	101.0	18.1	 16
279	  9	146.0	23.5	 16
280	  9	95.3	11.6	 16
281	  9	89.3	13.5	 16
282	  9	145.8	14.3	 16
283	  9	73.5	11.9	 16
284	  9	96.5	27.5	 16
285	  9	89.5	16.5	 16
286	  9	73.8	8.7	 16
287	  9	79.0	12.3	 16
288	  9	89.3	15.1	 16
289	  9	213.3	36.8	 16
290	  9	203.8	26.0	 16
291	  9	160.8	23.1	 16
292	  9	511.0	52.5	 16
293	  9	117.3	23.2	 16
294	  9	1239.5	112.9	 16
295	  9	365.3	35.5	 16
296	  9	137.0	18.9	 16
297	  9	306.0	35.7	 16
298	  9	112.8	22.4	 16
299	  9	162.3	27.1	 16
300	  9	217.8	25.0	 16
301	  9	125.3	15.5	 16
302	  9	94.0	20.2	 16
303	  9	83.3	6.9	 16
304	  9	111.0	16.3	 16
305	  9	522.0	51.4	 16
306	  9	159.3	20.9	 16
307	  9	136.8	14.3	 16
308	  9	380.5	27.7	 16
309	  9	157.0	22.2	 16
310	  9	395.5	56.3	 16
311	  9	477.5	48.6	 16
312	  9	99.5	16.9	 16
313	  9	326.3	51.3	 16
314	  9	158.8	15.7	 16
315	  9	111.3	20.5	 16
316	  9	235.0	40.2	 16
317	  9	445.8	33.3	 16
318	  9	78.3	13.4	 16
319	  9	78.5	13.9	 16
320	  9	238.3	36.6	 16
321	  9	149.5	22.1	 16
322	  9	181.0	19.3	 16
323	  9	80.3	13.6	 16
324	  9	82.3	11.2	 16
325	  9	96.3	12.5	 16
326	  9	69.0	11.7	 16
327	  9	68.3	10.3	 16
328	  9	386.3	49.2	 16
329	  9	174.3	25.5	 16
330	  9	144.0	20.0	 16
331	  9	94.3	22.0	 16
332	  9	391.5	41.1	 16
333	  9	334.0	31.7	 16
334	  9	120.3	17.7	 16
335	  9	78.5	13.2	 16
336	  9	80.0	12.8	 16
337	  9	86.5	15.1	 16
338	  9	78.3	13.0	 16
339	  9	180.8	27.6	 16
340	  9	88.5	13.8	 16
341	  9	97.0	18.7	 16
342	  9	160.8	13.5	 16
343	  9	144.8	12.5	 16
344	  9	618.5	57.6	 16
345	  9	74.5	13.0	 16
346	  9	852.8	139.6	 16
347	  9	120.0	25.7	 16
348	  9	941.5	58.2	 16
349	  9	114.3	18.9	 16
350	  9	1218.5	89.6	 16
351	  9	142.5	20.4	 16
352	  9	213.5	29.6	 16
353	  9	146.0	25.6	 16
354	  9	141.0	22.6	 16
355	  9	212.0	24.0	 16
356	  9	587.5	54.0	 16
357	  9	142.5	25.7	 16
358	  9	252.3	37.4	 16
359	  9	129.8	20.3	 16
360	  9	87.3	14.1	 16
361	  9	185.0	27.1	 16
362	  9	87.3	11.4	 16
363	  9	279.5	42.7	 16
364	  9	73.8	13.5	 16
365	  9	78.5	12.0	 16
366	  9	75.8	17.0	 16
367	  9	65.3	10.2	 16
368	  9	73.8	10.7	 16
369	  9	129.3	17.4	 16
370	  9	111.3	16.8	 16
371	  9	211.0	26.8	 16
372	  9	103.3	16.2	 16
373	  9	78.3	14.4	 16
374	  9	124.5	23.5	 16
375	  9	83.5	10.1	 16
376	  9	172.3	20.5	 16
377	  9	629.0	61.3	 16
378	  9	4418.3	491.3	 16
379	  9	118.5	19.1	 16
380	  9	71.0	11.8	 16
381	  9	108.5	18.5	 16
382	  9	192.3	34.0	 16
383	  9	239.8	33.2	 16
384	  9	502.8	36.7	 16
385	  9	510.5	41.6	 16
386	  9	148.5	22.5	 16
387	  9	335.5	38.3	 16
388	  9	244.3	26.9	 16
389	  9	78.5	16.1	 16
390	  9	85.5	16.2	 16
391	  9	127.8	22.2	 16
392	  9	102.0	17.0	 16
393	  9	84.3	14.9	 16
394	  9	2202.5	375.9	 16
395	  9	132.8	25.2	 16
396	  9	76.5	13.9	 16
397	  9	72.5	13.1	 16
398	  9	120.5	19.3	 16
399	  9	85.3	14.8	 16
400	  9	70.5	16.5	 16
401	  9	64.5	10.2	 16
402	  9	67.8	12.3	 16
403	  9	83.0	11.9	 16
404	  9	83.0	14.0	 16
405	  9	106.8	18.2	 16
406	  9	89.5	16.3	 16
407	  9	134.0	23.2	 16
408	  9	78.8	9.2	 16
409	  9	106.8	13.3	 16
410	  9	76.5	11.1	 16
411	  9	177.8	30.9	 16
412	  9	117.3	15.5	 16
413	  9	122.8	11.3	 16
414	  9	133.8	22.5	 16
415	  9	212.3	32.8	 16
416	  9	100.3	19.6	 16
417	  9	105.3	17.5	 16
418	  9	74.3	13.1	 16
419	  9	253.5	45.1	 16
420	  9	393.8	72.0	 16
421	  9	90.5	12.7	 16
422	  9	69.0	9.8	 16
423	  9	597.5	108.6	 16
424	  9	266.3	42.2	 16
425	  9	73.3	9.6	 16
426	  9	71.8	11.6	 16
427	  9	358.0	84.6	 16
428	  9	134.5	22.7	 16
429	  9	68.5	8.7	 16
430	  9	75.3	10.3	 16
431	  9	70.3	9.9	 12
432	  9	74.3	9.3	 16
433	  9	573.8	140.6	 16
434	  9	82.8	14.5	 16
435	  9	79.3	13.2	 16
436	  9	68.8	12.0	 16
437	  9	73.5	8.5	 16
438	  9	863.5	218.5	 16
439	  9	113.3	19.3	 16
440	  9	174.3	12.7	 16
441	  9	156.8	23.8	 16
442	  9	1205.3	198.4	 16
443	  9	255.5	29.2	 16
444	  9	359.3	70.7	 16
445	  9	80.8	13.0	 20
446	  9	120.0	15.1	 16
447	  9	87.5	18.7	 16
448	  9	77.0	12.8	 16
449	  9	74.3	9.8	 16
450	  9	151.3	24.4	 16
451	  9	315.0	35.7	 16
452	  9	83.5	11.2	 16
453	  9	173.3	22.9	 16
454	  9	779.3	96.9	 16
455	  9	152.0	20.8	 16
456	  9	106.3	11.2	 16
457	  9	72.3	11.8	 16
458	  9	71.8	12.1	 16
459	  9	74.0	12.7	 16
460	  9	284.5	28.6	 16
461	  9	82.8	16.1	 16
462	  9	83.0	14.5	 16
463	  9	169.3	22.8	 16
464	  9	65.3	15.8	 16
465	  9	211.5	23.9	 16
466	  9	201.5	20.5	 16
467	  9	71.3	15.0	 16
468	  9	79.0	11.2	 16
469	  9	98.8	17.4	 16
470	  9	106.3	13.3	 16
471	  9	98.0	20.4	 16
472	  9	122.5	18.4	 16
473	  9	128.8	18.7	 16
474	  9	237.3	33.7	 16
475	  9	86.8	14.3	 16
476	  9	79.0	14.3	 16
477	  9	89.8	30.4	 16
478	  9	151.8	29.8	 16
479	  9	76.3	11.5	 16
480	  9	132.0	15.7	 16
481	  9	83.5	12.5	 16
482	  9	67.8	10.8	 16
483	  9	63.0	7.7	 16
484	  9	390.5	36.4	 16
485	  9	84.3	13.2	 16
486	  9	1092.8	142.3	 16
487	  9	171.5	21.8	 16
488	  9	216.0	35.4	 16
489	  9	68.3	13.4	 16
490	  9	108.8	18.9	 16
491	  9	88.3	16.0	 16
492	  9	198.3	20.2	 16
493	  9	236.0	25.3	 16
494	  9	395.0	35.9	 16
495	  9	207.0	25.0	 16
496	  9	161.3	30.0	 16
497	  9	500.5	77.4	 16
498	  9	192.0	29.1	 16
499	  9	139.5	21.5	 16
500	  9	124.0	19.9	 16
501	  9	90.0	15.8	 16
502	  9	91.3	15.8	 16
503	  9	111.0	16.8	 16
504	  9	117.3	16.0	 16
505	  9	581.3	96.7	 16
506	  9	471.8	63.9	 16
507	  9	229.3	40.6	 16
508	  9	968.0	104.1	 16
509	  9	70.5	9.7	 16
510	  9	347.8	61.4	 16
511	  9	119.0	14.7	 16
512	  9	68.5	13.0	 16
513	  9	145.5	29.7	 16
514	  9	414.0	65.4	 16
515	  9	70.5	10.9	 16
516	  9	121.3	19.7	 16
517	  9	68.5	11.4	 16
518	  9	75.5	11.9	 16
519	  9	169.0	20.5	 16
520	  9	137.3	23.5	 16
521	  9	69.5	12.9	 16
522	  9	89.3	17.4	 16
523	  9	71.3	12.5	 16
524	  9	64.8	8.8	 16
525	  9	99.8	15.7	 16
526	  9	139.0	18.0	 16
527	  9	103.0	13.3	 16
528	  9	88.5	18.0	 16
529	  9	100.5	14.7	 16
530	  9	181.3	29.7	 16
531	  9	97.3	17.8	 16
532	  9	72.5	14.3	 16
533	  9	64.8	11.7	 16
534	  9	74.5	11.0	 16
535	  9	92.3	13.0	 16
536	  9	85.0	16.3	 16
537	  9	103.0	14.4	 16
538	  9	94.0	11.0	 16
539	  9	87.0	12.8	 16
540	  9	254.5	32.0	 16
541	  9	85.0	11.8	 16
542	  9	65.8	10.3	 16
543	  9	136.3	23.9	 16
544	  9	79.8	15.4	 16
545	  9	342.5	72.6	 16
546	  9	146.3	21.6	 16
547	  9	124.5	17.5	 16
548	  9	120.0	14.9	 16
549	  9	104.3	12.4	 16
550	  9	120.8	14.3	 16
551	  9	193.0	27.5	 16
552	  9	121.8	24.9	 16
553	  9	150.8	20.4	 16
554	  9	120.3	17.3	 16
555	  9	64.0	10.4	 16
556	  9	114.5	23.5	 16
557	  9	95.0	17.4	 16
558	  9	88.3	14.4	 16
559	  9	96.8	19.3	 16
560	  9	71.3	11.1	 16
561	  9	222.5	32.1	 16
562	  9	78.5	10.1	 16
563	  9	105.3	11.4	 16
564	  9	210.8	34.1	 16
565	  9	275.8	58.5	 16
566	  9	732.0	173.1	 16
567	  9	73.0	10.8	 16
568	  9	71.3	14.5	 16
569	  9	75.0	11.4	 16
570	  9	272.3	59.9	 16
571	  9	484.0	103.3	 16
572	  9	194.8	27.5	 16
573	  9	118.3	34.1	 16
574	  9	150.5	23.7	 16
575	  9	166.8	18.8	 16
576	  9	163.3	20.8	 16
577	  9	131.0	26.5	 16
578	  9	70.3	8.5	 16
579	  9	66.0	9.6	 16
580	  9	113.5	26.5	 16
581	  9	312.0	71.9	 16
582	  9	230.8	22.1	 16
583	  9	132.8	49.7	 16
584	  9	112.5	20.3	 16
585	  9	181.0	16.5	 16
586	  9	169.5	31.3	 16
587	  9	60.3	9.7	 16
588	  9	85.0	12.1	 16
589	  9	88.3	15.8	 16
590	  9	119.8	20.9	 16
591	  9	202.3	41.0	 16
592	  9	71.3	10.6	 16
593	  9	110.8	17.8	 16
594	  9	116.3	21.1	 16
595	  9	161.5	28.0	 16
596	  9	581.3	153.5	 16
597	  9	643.5	55.0	 16
598	  9	221.0	46.0	 16
599	  9	113.0	25.5	 16
600	  9	135.5	15.4	 16
601	  9	124.3	18.9	 16
602	  9	112.0	18.5	 16
603	  9	230.3	57.4	 16
604	  9	137.0	31.6	 16
605	  9	67.3	15.9	 16
606	  9	214.0	44.9	 16
607	  9	77.5	10.1	 16
608	  9	63.3	9.2	 16
609	  9	80.5	9.2	 16
610	  9	96.0	15.1	 16
611	  9	93.3	18.8	 16
612	  9	128.0	24.1	 16
613	  9	1478.3	363.9	 16
614	  9	94.8	15.5	 16
615	  9	101.5	15.4	 16
616	  9	114.3	16.0	 16
617	  9	346.3	67.8	 16
618	  9	153.8	19.1	 16
619	  9	75.0	14.6	 16
620	  9	125.3	18.8	 16
621	  9	104.0	15.2	 16
622	  9	84.5	15.0	 16
623	  9	121.8	25.5	 20
624	  9	174.3	22.3	 16
625	  9	81.3	8.7	 16
626	  9	68.3	15.0	 16
627	  9	132.3	17.3	 16
628	  9	102.3	14.4	 16
629	  9	79.3	12.8	 16
630	  9	160.3	18.7	 16
631	  9	115.5	16.8	 16
632	  9	657.5	145.9	 16
633	  9	81.5	12.0	 16
634	  9	421.5	38.5	 16
635	  9	842.5	75.5	 16
636	  9	230.3	28.5	 16
637	  9	68.3	13.1	 16
638	  9	66.8	11.0	 16
639	  9	60.3	7.6	 16
640	  9	78.0	11.6	 16
641	  9	403.8	30.5	 16
642	  9	69.3	11.5	 16
643	  9	84.3	20.5	 16
644	  9	87.5	16.5	 16
645	  9	80.0	14.0	 16
646	  9	162.5	30.1	 16
647	  9	100.8	15.1	 16
648	  9	461.0	74.9	 16
649	  9	69.0	11.7	 16
650	  9	71.3	16.1	 16
651	  9	67.5	11.9	 16
652	  9	118.5	15.5	 16
653	  9	231.3	30.5	 16
654	  9	132.5	24.7	 16
655	  9	149.8	24.8	 16
656	  9	72.0	18.4	 16
657	  9	177.3	34.3	 16
658	  9	127.0	19.2	 16
659	  9	136.3	15.1	 16
660	  9	115.3	21.8	 16
661	  9	82.8	12.8	 16
662	  9	72.5	11.7	 16
663	  9	201.3	34.8	 16
664	  9	80.3	10.0	 16
665	  9	103.0	15.9	 16
666	  9	87.5	14.4	 16
667	  9	214.8	33.2	 16
668	  9	245.8	34.0	 16
669	  9	160.5	21.6	 16
670	  9	132.5	28.8	 16
671	  9	231.0	35.0	 16
672	  9	189.5	23.3	 16
673	  9	109.5	16.5	 16
674	  9	126.5	19.4	 16
675	  9	81.3	25.9	 16
676	  9	77.0	12.1	 16
677	  9	132.3	17.4	 16
678	  9	92.5	17.6	 16
679	  9	125.8	22.6	 16
680	  9	281.8	44.6	 16
681	  9	2670.3	530.3	 16
682	  9	3050.3	556.9	 16
683	  9	3219.8	145.2	 16
684	  9	3335.0	181.2	 16
685	  9	178.5	18.2	 16
686	  9	141.3	22.8	 16
687	  9	72.3	9.5	 16
688	  9	71.0	10.8	 16
689	  9	77.0	14.6	 16
690	  9	76.0	12.9	 16
691	  9	150.8	24.0	 16
692	  9	83.3	18.6	 16
693	  9	159.3	22.2	 16
694	  9	114.3	13.8	 16
695	  9	79.3	13.0	 16
696	  9	89.5	16.1	 16
697	  9	177.0	28.6	 16
698	  9	520.5	69.3	 16
699	  9	155.3	26.5	 16
700	  9	199.5	22.7	 16
701	  9	86.0	12.6	 16
702	  9	71.8	11.1	 16
703	  9	74.0	10.7	 16
704	  9	68.5	10.8	 16
705	  9	92.3	11.9	 16
706	  9	109.5	20.6	 16
707	  9	112.3	12.7	 16
708	  9	217.0	33.1	 16
709	  9	229.3	29.3	 16
710	  9	390.5	52.6	 16
711	  9	144.0	19.7	 16
  0	 10	7720.3	765.3	 16
  1	 10	96.8	13.1	 16
  2	 10	112.3	13.8	 16
  3	 10	66.5	16.3	 16
  4	 10	85.0	16.6	 16
  5	 10	77.0	17.5	 16
  6	 10	100.3	18.6	 16
  7	 10	89.5	17.8	 16
  8	 10	74.3	10.4	 16
  9	 10	100.8	17.6	 16
 10	 10	136.8	25.1	 16
 11	 10	74.3	11.6	 16
 12	 10	7958.5	492.1	 16
 13	 10	172.3	23.2	 16
 14	 10	152.0	19.3	 16
 15	 10	148.3	20.2	 16
 16	 10	7913.8	1030.2	 16
 17	 10	88.3	24.5	 16
 18	 10	8822.3	834.8	 16
 19	 10	154.5	18.4	 16
 20	 10	147.0	23.5	 16
 21	 10	143.0	17.2	 16
 22	 10	129.3	17.4	 16
 23	 10	81.0	15.5	 16
 24	 10	8245.8	573.2	 16
 25	 10	144.0	21.6	 16
 26	 10	116.3	12.9	 16
 27	 10	130.0	17.7	 16
 28	 10	7325.3	507.3	 16
 29	 10	85.5	15.6	 16
 30	 10	8435.3	1485.2	 16
 31	 10	144.5	22.4	 16
 32	 10	131.5	15.8	 16
 33	 10	135.5	22.1	 16
 34	 10	108.8	12.9	 16
 35	 10	86.5	13.6	 16
 36	 10	8288.3	681.4	 16
 37	 10	121.0	14.2	 16
 38	 10	136.3	17.0	 16
 39	 10	136.3	15.2	 16
 40	 10	6855.0	774.3	 16
 41	 10	349.0	89.0	 16
 42	 10	8714.0	774.0	 16
 43	 10	244.5	62.8	 16
 44	 10	122.5	26.1	 16
 45	 10	123.8	16.0	 16
 46	 10	7587.0	646.0	 16
 47	 10	97.0	16.2	 16
 48	 10	106.3	15.3	 16
 49	 10	125.5	22.2	 16
 50	 10	6880.5	641.8	 16
 51	 10	144.8	18.8	 16
 52	 10	128.3	19.6	 16
 53	 10	78.8	14.2	 16
 54	 10	8023.8	490.4	 16
 55	 10	136.8	14.4	 16
 56	 10	118.3	12.8	 16
 57	 10	118.0	17.0	 16
 58	 10	121.3	14.4	 16
 59	 10	69.5	11.0	 16
 60	 10	70.0	11.6	 16
 61	 10	77.0	14.4	 16
 62	 10	8647.5	710.7	 16
 63	 10	138.3	24.3	 16
 64	 10	111.0	18.4	 16
 65	 10	114.3	18.5	 16
 66	 10	7457.8	508.8	 16
 67	 10	93.3	14.0	 16
 68	 10	8303.0	713.6	 16
 69	 10	145.3	18.0	 16
 70	 10	118.8	13.4	 16
 71	 10	130.3	23.5	 16
 72	 10	7136.5	1338.8	 16
 73	 10	78.3	15.6	 16
 74	 10	116.0	21.5	 16
 75	 10	112.0	17.8	 16
 76	 10	108.5	14.8	 16
 77	 10	111.8	16.6	 16
 78	 10	122.3	20.0	 16
 79	 10	67.5	10.6	 16
 80	 10	7618.0	1508.1	 16
 81	 10	148.0	19.0	 16
 82	 10	136.0	21.6	 16
 83	 10	117.5	15.3	 16
 84	 10	7131.8	751.4	 16
 85	 10	86.8	12.2	 16
 86	 10	119.8	17.0	 16
 87	 10	119.3	16.4	 16
 88	 10	7356.0	710.9	 16
 89	 10	149.5	20.9	 16
 90	 10	123.5	14.5	 16
 91	 10	76.3	12.4	 16
 92	 10	6979.8	633.3	 16
 93	 10	146.8	25.5	 16
 94	 10	119.3	15.9	 16
 95	 10	6908.0	664.9	 16
 96	 10	133.0	24.6	 16
 97	 10	69.8	14.8	 16
 98	 10	6990.3	869.2	 16
 99	 10	132.0	17.2	 16
100	 10	122.5	17.0	 16
101	 10	6631.5	620.0	 16
102	 10	130.3	28.2	 16
103	 10	68.3	8.2	 16
104	 10	7760.0	643.1	 16
105	 10	139.3	26.2	 16
106	 10	101.0	15.5	 16
107	 10	132.3	18.3	 20
108	 10	7069.3	1629.6	 16
109	 10	73.0	10.0	 16
110	 10	63.0	8.9	 16
111	 10	149.8	17.5	 16
112	 10	450.5	62.3	 16
113	 10	165.5	20.3	 16
114	 10	259.0	42.3	 16
115	 10	84.3	9.8	 16
116	 10	73.5	16.0	 16
117	 10	77.8	15.2	 16
118	 10	80.3	11.9	 16
119	 10	91.8	13.1	 16
120	 10	93.3	11.9	 16
121	 10	87.8	14.6	 16
122	 10	83.3	14.7	 16
123	 10	95.5	15.8	 16
124	 10	126.0	16.8	 16
125	 10	78.0	10.2	 16
126	 10	81.8	27.2	 16
127	 10	75.5	10.6	 16
128	 10	68.8	11.5	 16
129	 10	78.8	10.0	 16
130	 10	101.3	14.4	 16
131	 10	110.5	14.6	 16
132	 10	141.0	39.1	 16
133	 10	78.8	11.6	 16
134	 10	86.8	28.6	 16
135	 10	68.8	12.0	 16
136	 10	72.3	12.8	 16
137	 10	78.0	9.7	 16
138	 10	62.8	9.8	 16
139	 10	84.8	18.4	 16
140	 10	72.5	10.1	 16
141	 10	78.3	10.5	 16
142	 10	93.0	12.7	 16
143	 10	210.8	48.8	 16
144	 10	208.3	27.4	 16
145	 10	94.0	14.0	 16
146	 10	88.3	12.6	 16
147	 10	75.3	14.9	 16
148	 10	78.3	9.4	 16
149	 10	83.0	13.9	 16
150	 10	93.3	14.6	 16
151	 10	75.5	13.3	 16
152	 10	1009.5	102.6	 16
153	 10	96.8	20.0	 16
154	 10	232.0	25.5	 16
155	 10	248.0	29.1	 16
156	 10	90.5	11.9	 16
157	 10	273.8	37.0	 16
158	 10	125.8	17.0	 16
159	 10	203.0	21.9	 16
160	 10	564.5	51.0	 16
161	 10	76.0	11.6	 16
162	 10	88.0	27.3	 16
163	 10	95.8	15.7	 16
164	 10	109.3	13.5	 16
165	 10	172.3	31.4	 16
166	 10	84.3	11.9	 16
167	 10	81.3	15.2	 16
168	 10	103.0	10.8	 16
169	 10	468.8	52.9	 16
170	 10	481.5	84.1	 16
171	 10	81.3	15.3	 16
172	 10	101.0	15.4	 16
173	 10	78.3	12.1	 16
174	 10	102.5	17.6	 16
175	 10	169.5	23.4	 16
176	 10	85.0	15.7	 16
177	 10	85.8	20.9	 16
178	 10	76.3	16.0	 16
179	 10	79.0	10.5	 16
180	 10	77.8	16.3	 16
181	 10	86.3	11.3	 16
182	 10	88.3	17.6	 16
183	 10	75.3	11.9	 16
184	 10	83.5	11.2	 16
185	 10	74.3	10.4	 16
186	 10	85.8	9.5	 16
187	 10	87.0	16.9	 16
188	 10	78.3	11.9	 16
189	 10	75.0	10.2	 16
190	 10	86.8	15.4	 16
191	 10	214.8	20.8	 16
192	 10	137.3	22.0	 16
193	 10	81.3	13.7	 16
194	 10	54.5	6.1	 16
195	 10	74.0	9.0	 16
196	 10	82.3	14.3	 16
197	 10	69.8	11.8	 16
198	 10	86.5	9.8	 16
199	 10	138.0	22.7	 16
200	 10	83.3	20.3	 16
201	 10	313.3	24.3	 16
202	 10	79.3	16.6	 16
203	 10	88.0	13.1	 16
204	 10	74.3	13.6	 16
205	 10	116.8	20.7	 16
206	 10	196.0	24.1	 16
207	 10	78.5	8.8	 16
208	 10	132.3	20.4	 16
209	 10	75.5	12.2	 16
210	 10	163.0	15.7	 16
211	 10	96.0	19.7	 16
212	 10	245.3	30.7	 16
213	 10	174.8	34.1	 16
214	 10	193.5	14.2	 16
215	 10	119.3	17.3	 16
216	 10	84.5	13.3	 16
217	 10	91.5	13.7	 16
218	 10	87.3	13.1	 16
219	 10	65.5	9.5	 16
220	 10	124.5	19.4	 16
221	 10	160.8	22.5	 16
222	 10	99.3	14.5	 16
223	 10	121.5	21.0	 16
224	 10	150.8	21.4	 16
225	 10	89.0	12.3	 16
226	 10	76.3	14.7	 16
227	 10	81.3	15.3	 16
228	 10	67.3	14.2	 16
229	 10	109.3	11.5	 16
230	 10	83.5	12.9	 16
231	 10	129.3	26.6	 16
232	 10	126.0	16.1	 16
233	 10	152.8	25.6	 16
234	 10	82.0	18.3	 16
235	 10	138.0	27.1	 16
236	 10	109.3	15.3	 16
237	 10	87.8	16.4	 16
238	 10	105.8	73.3	 16
239	 10	128.3	23.2	 16
240	 10	111.3	17.2	 16
241	 10	128.5	26.0	 16
242	 10	82.8	12.6	 16
243	 10	82.3	12.3	 16
244	 10	86.0	10.7	 16
245	 10	141.8	18.4	 16
246	 10	69.3	24.2	 16
247	 10	422.3	89.0	 16
248	 10	88.3	17.5	 16
249	 10	76.3	13.1	 16
250	 10	84.8	13.1	 16
251	 10	115.3	11.7	 16
252	 10	81.3	36.1	 16
253	 10	218.8	30.1	 16
254	 10	105.0	19.7	 16
255	 10	76.3	14.5	 16
256	 10	121.8	17.1	 16
257	 10	88.5	12.7	 16
258	 10	189.3	23.9	 16
259	 10	97.5	13.2	 16
260	 10	140.0	20.5	 16
261	 10	123.3	18.5	 16
262	 10	81.0	19.5	 16
263	 10	75.3	12.4	 16
264	 10	74.3	9.1	 16
265	 10	80.3	10.4	 16
266	 10	163.0	19.5	 16
267	 10	168.3	23.5	 16
268	 10	102.0	16.8	 16
269	 10	229.8	25.3	 16
270	 10	70.8	9.4	 16
271	 10	75.0	8.7	 16
272	 10	66.0	9.2	 16
273	 10	90.8	19.0	 16
274	 10	89.3	16.6	 16
275	 10	76.5	13.6	 16
276	 10	79.8	13.1	 16
277	 10	79.5	16.9	 16
278	 10	98.3	17.9	 16
279	 10	119.0	12.6	 16
280	 10	86.3	13.6	 16
281	 10	94.0	22.0	 16
282	 10	141.3	13.2	 16
283	 10	74.3	9.2	 16
284	 10	67.8	9.7	 16
285	 10	69.8	10.9	 20
286	 10	83.0	25.0	 16
287	 10	97.0	18.8	 16
288	 10	97.0	14.7	 16
289	 10	101.5	19.5	 16
290	 10	145.3	14.2	 16
291	 10	141.8	14.8	 16
292	 10	219.5	27.4	 16
293	 10	116.3	22.1	 16
294	 10	1381.3	127.7	 16
295	 10	409.5	36.9	 16
296	 10	110.8	18.4	 16
297	 10	413.8	64.9	 16
298	 10	153.0	24.6	 16
299	 10	86.3	10.4	 16
300	 10	83.3	11.5	 16
301	 10	113.0	14.7	 16
302	 10	76.8	11.7	 16
303	 10	77.3	10.5	 16
304	 10	141.3	19.5	 16
305	 10	350.0	34.4	 16
306	 10	78.5	15.2	 16
307	 10	139.0	18.7	 16
308	 10	140.5	15.8	 16
309	 10	103.3	20.3	 16
310	 10	147.5	20.1	 16
311	 10	113.3	20.7	 16
312	 10	75.5	12.8	 16
313	 10	86.8	14.1	 16
314	 10	108.8	17.9	 16
315	 10	77.3	11.2	 16
316	 10	154.3	23.6	 16
317	 10	1120.3	121.5	 16
318	 10	74.8	13.2	 16
319	 10	75.5	9.5	 16
320	 10	115.5	35.6	 16
321	 10	104.0	13.2	 16
322	 10	225.8	22.8	 16
323	 10	74.0	7.7	 16
324	 10	139.0	18.4	 16
325	 10	93.3	15.0	 16
326	 10	68.5	13.1	 16
327	 10	81.0	14.7	 16
328	 10	181.8	25.4	 16
329	 10	122.3	16.2	 16
330	 10	84.0	18.4	 16
331	 10	87.8	12.3	 16
332	 10	241.5	28.9	 16
333	 10	243.0	25.5	 16
334	 10	117.3	17.3	 16
335	 10	66.0	12.4	 16
336	 10	67.8	17.5	 16
337	 10	73.3	13.1	 16
338	 10	77.3	10.1	 16
339	 10	124.3	19.8	 16
340	 10	108.0	15.4	 16
341	 10	71.5	11.2	 16
342	 10	135.0	21.9	 16
343	 10	85.0	11.1	 16
344	 10	278.5	32.6	 16
345	 10	78.0	13.0	 16
346	 10	244.3	26.2	 16
347	 10	95.0	14.8	 16
348	 10	696.3	94.2	 16
349	 10	92.3	14.4	 16
350	 10	238.5	27.1	 16
351	 10	111.5	16.9	 16
352	 10	141.0	15.0	 16
353	 10	93.8	12.2	 16
354	 10	87.5	10.8	 16
355	 10	138.5	19.1	 16
356	 10	186.5	33.2	 16
357	 10	98.0	14.4	 16
358	 10	94.0	11.0	 16
359	 10	134.0	14.8	 16
360	 10	80.0	11.0	 16
361	 10	116.3	13.1	 16
362	 10	85.3	12.9	 16
363	 10	92.3	8.1	 16
364	 10	68.0	8.7	 12
365	 10	74.3	12.5	 16
366	 10	66.3	12.0	 16
367	 10	67.0	14.7	 16
368	 10	79.0	13.7	 16
369	 10	94.8	14.6	 16
370	 10	126.3	23.0	 16
371	 10	103.8	18.4	 16
372	 10	82.8	15.7	 16
373	 10	69.5	13.6	 16
374	 10	68.8	11.7	 16
375	 10	96.3	17.3	 16
376	 10	103.5	18.6	 16
377	 10	270.3	23.4	 16
378	 10	643.8	52.8	 16
379	 10	88.8	13.0	 16
380	 10	69.5	17.4	 16
381	 10	62.0	7.8	 16
382	 10	88.5	14.4	 16
383	 10	173.3	19.0	 16
384	 10	167.5	25.2	 16
385	 10	139.5	16.7	 16
386	 10	215.5	27.7	 16
387	 10	136.8	15.0	 16
388	 10	88.5	12.1	 16
389	 10	68.5	12.6	 16
390	 10	89.5	12.9	 16
391	 10	92.8	12.4	 16
392	 10	95.0	13.6	 16
393	 10	75.0	9.6	 16
394	 10	617.0	106.3	 16
395	 10	212.0	20.3	 16
396	 10	76.0	9.7	 16
397	 10	81.0	11.1	 16
398	 10	92.5	12.4	 16
399	 10	77.0	19.0	 16
400	 10	73.3	11.0	 16
401	 10	90.8	19.6	 16
402	 10	85.5	13.0	 16
403	 10	70.3	13.7	 16
404	 10	92.5	14.9	 16
405	 10	109.5	20.9	 16
406	 10	71.3	13.4	 16
407	 10	130.3	66.0	 16
408	 10	72.3	11.5	 16
409	 10	101.8	13.4	 16
410	 10	69.0	11.3	 16
411	 10	364.5	50.2	 16
412	 10	104.3	13.0	 16
413	 10	91.8	13.0	 16
414	 10	151.3	28.1	 16
415	 10	70.5	11.0	 16
416	 10	125.3	23.2	 16
417	 10	77.5	14.3	 16
418	 10	66.5	12.4	 16
419	 10	87.8	13.7	 16
420	 10	178.0	24.3	 16
421	 10	84.8	13.9	 16
422	 10	76.5	8.9	 16
423	 10	93.8	18.8	 16
424	 10	82.0	14.4	 16
425	 10	74.3	11.8	 16
426	 10	73.0	16.1	 16
427	 10	93.5	15.6	 16
428	 10	93.5	14.0	 16
429	 10	70.0	15.5	 16
430	 10	75.0	11.2	 16
431	 10	76.3	11.9	 16
432	 10	72.3	10.6	 16
433	 10	83.5	16.6	 16
434	 10	81.0	15.3	 16
435	 10	68.5	10.8	 16
436	 10	79.3	14.1	 16
437	 10	65.0	14.9	 16
438	 10	455.8	94.1	 16
439	 10	97.8	15.3	 16
440	 10	116.3	21.9	 16
441	 10	91.0	12.1	 16
442	 10	241.5	36.5	 16
443	 10	130.5	18.3	 16
444	 10	91.3	15.0	 16
445	 10	87.3	12.3	 16
446	 10	77.3	10.4	 16
447	 10	73.3	10.6	 16
448	 10	68.5	11.8	 16
449	 10	70.3	12.4	 16
450	 10	105.8	18.4	 16
451	 10	98.8	15.7	 16
452	 10	122.8	18.3	 16
453	 10	134.5	22.9	 16
454	 10	524.0	79.6	 16
455	 10	117.8	16.8	 16
456	 10	104.3	18.4	 16
457	 10	66.8	11.2	 16
458	 10	89.5	13.9	 16
459	 10	72.5	9.8	 16
460	 10	261.5	44.1	 16
461	 10	60.5	11.1	 16
462	 10	83.8	16.3	 16
463	 10	83.8	14.3	 20
464	 10	66.0	13.4	 16
465	 10	87.3	15.8	 16
466	 10	301.3	36.8	 16
467	 10	80.3	13.1	 16
468	 10	74.3	11.6	 16
469	 10	72.8	11.3	 16
470	 10	64.0	12.3	 16
471	 10	81.3	12.5	 16
472	 10	148.8	26.3	 16
473	 10	99.5	17.1	 16
474	 10	75.3	14.5	 16
475	 10	82.5	21.8	 16
476	 10	55.5	8.7	 16
477	 10	75.5	14.2	 16
478	 10	82.0	9.2	 16
479	 10	85.3	13.5	 16
480	 10	81.0	9.6	 16
481	 10	70.0	10.6	 16
482	 10	67.5	10.2	 16
483	 10	63.8	10.3	 16
484	 10	146.3	19.8	 16
485	 10	84.0	14.5	 16
486	 10	179.0	18.7	 16
487	 10	80.8	12.3	 16
488	 10	85.5	12.0	 16
489	 10	74.0	13.8	 16
490	 10	81.0	14.1	 16
491	 10	85.0	16.3	 16
492	 10	95.3	14.1	 16
493	 10	214.5	22.0	 16
494	 10	420.5	46.9	 16
495	 10	251.8	47.2	 16
496	 10	229.5	22.8	 16
497	 10	468.0	36.1	 16
498	 10	256.8	54.9	 16
499	 10	196.0	29.5	 16
500	 10	80.0	11.5	 16
501	 10	74.5	13.0	 16
502	 10	74.0	11.5	 16
503	 10	99.3	16.5	 16
504	 10	104.0	13.9	 16
505	 10	95.3	7.8	 16
506	 10	754.0	75.4	 16
507	 10	81.3	12.1	 16
508	 10	267.3	32.1	 16
509	 10	78.0	21.5	 16
510	 10	140.3	20.9	 16
511	 10	95.5	18.5	 16
512	 10	65.5	7.7	 16
513	 10	77.0	18.1	 16
514	 10	122.5	20.1	 16
515	 10	58.8	13.2	 16
516	 10	63.5	11.0	 16
517	 10	74.0	11.7	 16
518	 10	63.8	13.5	 16
519	 10	86.5	10.6	 16
520	 10	75.8	14.8	 16
521	 10	70.8	11.2	 16
522	 10	111.0	15.9	 16
523	 10	76.3	11.1	 16
524	 10	72.5	23.4	 16
525	 10	110.5	20.2	 16
526	 10	99.0	16.4	 16
527	 10	101.5	13.0	 16
528	 10	85.5	14.4	 16
529	 10	81.0	13.0	 16
530	 10	148.3	20.5	 16
531	 10	77.3	11.6	 16
532	 10	66.3	8.9	 16
533	 10	74.3	10.4	 16
534	 10	73.3	14.7	 16
535	 10	100.5	15.2	 16
536	 10	119.3	79.3	 16
537	 10	79.8	17.0	 16
538	 10	79.3	15.8	 16
539	 10	82.0	13.5	 16
540	 10	94.0	16.0	 16
541	 10	84.0	16.4	 16
542	 10	66.5	15.2	 16
543	 10	83.3	17.1	 16
544	 10	73.5	14.0	 16
545	 10	91.3	13.8	 16
546	 10	166.8	22.7	 16
547	 10	256.0	73.0	 16
548	 10	77.5	13.3	 16
549	 10	107.0	14.9	 16
550	 10	120.0	23.2	 16
551	 10	257.0	31.2	 16
552	 10	155.8	16.9	 16
553	 10	149.8	22.3	 16
554	 10	84.3	12.9	 16
555	 10	66.8	14.6	 16
556	 10	78.3	12.7	 16
557	 10	86.3	15.9	 16
558	 10	77.0	11.8	 16
559	 10	99.3	11.7	 16
560	 10	64.5	11.3	 16
561	 10	137.5	20.8	 16
562	 10	77.3	12.3	 16
563	 10	86.3	12.8	 16
564	 10	107.5	11.8	 16
565	 10	155.5	32.2	 16
566	 10	195.0	40.0	 16
567	 10	66.0	9.6	 16
568	 10	65.5	11.3	 16
569	 10	130.8	17.4	 16
570	 10	147.8	22.0	 16
571	 10	307.3	58.9	 16
572	 10	209.0	21.8	 16
573	 10	85.5	16.6	 16
574	 10	142.0	25.9	 16
575	 10	162.5	21.1	 16
576	 10	149.5	19.6	 16
577	 10	95.3	14.5	 16
578	 10	63.3	9.2	 16
579	 10	70.0	11.1	 16
580	 10	108.8	21.2	 16
581	 10	102.3	16.5	 16
582	 10	122.0	21.5	 16
583	 10	87.5	12.9	 16
584	 10	87.8	15.9	 16
585	 10	95.3	14.0	 16
586	 10	75.3	15.8	 16
587	 10	68.5	10.3	 16
588	 10	84.5	16.2	 16
589	 10	92.0	12.7	 16
590	 10	82.0	11.4	 16
591	 10	86.3	13.9	 16
592	 10	73.3	10.3	 16
593	 10	95.3	13.9	 16
594	 10	83.5	11.0	 16
595	 10	124.5	20.0	 16
596	 10	124.0	13.4	 16
597	 10	119.8	17.1	 16
598	 10	113.0	23.9	 16
599	 10	150.3	18.3	 16
600	 10	148.8	20.1	 16
601	 10	121.5	13.5	 16
602	 10	87.3	11.7	 16
603	 10	75.8	10.0	 16
604	 10	70.0	12.5	 16
605	 10	70.3	7.3	 16
606	 10	218.0	44.2	 16
607	 10	85.0	12.7	 16
608	 10	76.8	10.9	 16
609	 10	73.3	11.8	 16
610	 10	130.3	16.5	 16
611	 10	122.0	19.3	 16
612	 10	83.5	14.8	 16
613	 10	240.5	37.0	 16
614	 10	80.8	11.2	 16
615	 10	78.0	11.8	 16
616	 10	87.3	12.5	 16
617	 10	166.0	22.3	 16
618	 10	129.0	15.6	 16
619	 10	73.3	17.5	 16
620	 10	78.5	9.6	 16
621	 10	97.5	12.3	 16
622	 10	71.0	11.1	 16
623	 10	77.3	11.5	 16
624	 10	66.0	11.8	 16
625	 10	80.5	12.6	 16
626	 10	72.8	15.0	 16
627	 10	70.3	10.4	 16
628	 10	115.5	14.1	 16
629	 10	93.5	15.4	 16
630	 10	134.8	21.6	 16
631	 10	231.3	24.9	 16
632	 10	127.0	27.1	 16
633	 10	82.3	19.7	 16
634	 10	361.5	72.0	 16
635	 10	126.5	23.0	 16
636	 10	84.3	10.3	 16
637	 10	72.5	9.0	 16
638	 10	74.3	10.5	 16
639	 10	67.3	12.8	 16
640	 10	70.5	10.0	 16
641	 10	368.3	68.9	 20
642	 10	68.0	12.0	 16
643	 10	82.3	14.3	 16
644	 10	126.8	15.5	 16
645	 10	98.3	59.6	 16
646	 10	73.8	11.2	 16
647	 10	123.3	17.7	 16
648	 10	180.3	27.1	 16
649	 10	65.5	12.6	 16
650	 10	65.5	12.7	 16
651	 10	75.0	14.9	 16
652	 10	73.8	11.1	 16
653	 10	164.3	19.5	 16
654	 10	112.8	16.9	 16
655	 10	94.8	13.6	 16
656	 10	72.3	10.7	 16
657	 10	87.8	21.1	 16
658	 10	317.8	30.0	 16
659	 10	82.5	17.7	 16
660	 10	88.3	13.9	 16
661	 10	77.3	15.1	 16
662	 10	72.8	12.4	 16
663	 10	195.8	38.2	 16
664	 10	81.3	20.7	 16
665	 10	102.5	14.9	 16
666	 10	83.3	14.1	 16
667	 10	203.5	22.3	 16
668	 10	156.8	24.9	 16
669	 10	132.5	20.4	 16
670	 10	143.0	18.8	 16
671	 10	94.3	12.7	 16
672	 10	138.3	15.1	 16
673	 10	104.0	18.6	 16
674	 10	81.5	9.6	 16
675	 10	86.3	11.5	 16
676	 10	104.0	15.5	 16
677	 10	133.8	20.2	 16
678	 10	74.3	14.7	 16
679	 10	74.0	14.8	 16
680	 10	268.8	20.6	 16
681	 10	499.5	67.6	 16
682	 10	590.5	56.8	 16
683	 10	565.3	90.4	 16
684	 10	607.8	90.1	 16
685	 10	112.8	18.1	 16
686	 10	106.3	19.5	 16
687	 10	85.5	15.7	 16
688	 10	72.3	8.8	 16
689	 10	75.3	12.4	 16
690	 10	70.8	16.2	 16
691	 10	137.3	15.6	 16
692	 10	79.5	14.3	 16
693	 10	88.0	10.3	 16
694	 10	86.3	11.9	 16
695	 10	74.8	15.8	 16
696	 10	72.8	12.7	 16
697	 10	94.0	16.4	 16
698	 10	135.5	20.0	 16
699	 10	108.0	16.9	 16
700	 10	89.0	13.6	 16
701	 10	85.3	15.5	 16
702	 10	71.0	11.6	 16
703	 10	66.3	12.4	 16
704	 10	68.0	10.6	 16
705	 10	89.0	17.8	 16
706	 10	79.0	10.9	 16
707	 10	108.0	14.0	 16
708	 10	202.5	30.0	 16
709	 10	265.3	34.9	 16
710	 10	99.3	12.0	 16
711	 10	332.5	77.8	 16
  0	 11	132.8	19.9	 16
  1	 11	106.8	15.4	 16
  2	 11	80.0	9.3	 16
  3	 11	93.5	13.1	 16
  4	 11	71.3	10.0	 16
  5	 11	362.5	40.6	 16
  6	 11	71.5	10.3	 16
  7	 11	264.3	74.2	 16
  8	 11	144.5	20.6	 16
  9	 11	81.3	13.5	 16
 10	 11	92.0	13.9	 16
 11	 11	57.0	8.3	 16
 12	 11	142.8	23.0	 16
 13	 11	8046.0	1712.9	 16
 14	 11	8060.3	1420.6	 16
 15	 11	7999.3	1287.4	 16
 16	 11	134.5	20.5	 16
 17	 11	61.3	10.0	 16
 18	 11	140.8	25.3	 16
 19	 11	8227.8	731.0	 16
 20	 11	8345.3	940.8	 16
 21	 11	7956.3	1951.8	 16
 22	 11	128.8	19.8	 16
 23	 11	69.8	13.3	 16
 24	 11	8291.0	1461.0	 16
 25	 11	132.5	17.0	 16
 26	 11	112.8	22.2	 16
 27	 11	125.3	14.4	 16
 28	 11	7659.3	782.2	 16
 29	 11	64.8	11.6	 16
 30	 11	121.0	12.3	 16
 31	 11	8090.3	1339.9	 16
 32	 11	8080.5	1107.5	 16
 33	 11	7831.3	1146.8	 16
 34	 11	126.5	18.4	 16
 35	 11	61.5	7.9	 16
 36	 11	133.3	20.3	 16
 37	 11	7777.5	723.2	 16
 38	 11	7801.0	1397.2	 16
 39	 11	7654.8	1339.1	 16
 40	 11	133.8	22.6	 16
 41	 11	106.3	34.8	 16
 42	 11	8456.0	1035.8	 16
 43	 11	151.8	31.2	 16
 44	 11	114.5	17.5	 16
 45	 11	115.3	15.2	 16
 46	 11	7417.5	1448.5	 16
 47	 11	68.0	8.6	 16
 48	 11	100.0	16.3	 16
 49	 11	116.0	16.4	 16
 50	 11	7080.8	791.9	 16
 51	 11	113.3	14.3	 16
 52	 11	125.5	19.3	 16
 53	 11	71.5	11.0	 16
 54	 11	7641.0	765.8	 16
 55	 11	123.3	19.8	 16
 56	 11	102.3	14.8	 16
 57	 11	113.8	17.6	 16
 58	 11	107.5	16.5	 16
 59	 11	65.0	10.0	 16
 60	 11	54.8	11.2	 16
 61	 11	65.3	14.5	 16
 62	 11	8450.0	765.4	 16
 63	 11	125.0	19.9	 16
 64	 11	120.3	26.0	 16
 65	 11	112.8	17.4	 16
 66	 11	7320.8	796.2	 16
 67	 11	74.5	13.3	 16
 68	 11	121.5	15.1	 16
 69	 11	7818.0	861.0	 16
 70	 11	7717.8	1129.0	 16
 71	 11	7576.8	1533.2	 16
 72	 11	121.5	19.8	 16
 73	 11	65.3	9.2	 16
 74	 11	108.0	15.7	 16
 75	 11	107.3	15.6	 16
 76	 11	105.5	17.0	 16
 77	 11	115.3	24.7	 16
 78	 11	118.3	18.0	 16
 79	 11	58.3	11.9	 16
 80	 11	101.5	23.2	 16
 81	 11	7838.5	1173.5	 16
 82	 11	7913.5	899.8	 16
 83	 11	7640.8	766.3	 16
 84	 11	133.5	22.8	 16
 85	 11	69.8	12.5	 16
 86	 11	120.0	12.9	 16
 87	 11	7311.8	979.0	 16
 88	 11	8157.8	1383.6	 16
 89	 11	7638.5	1059.3	 16
 90	 11	133.8	21.1	 16
 91	 11	57.0	9.5	 16
 92	 11	115.3	15.3	 16
 93	 11	7376.8	673.3	 16
 94	 11	7328.8	514.3	 16
 95	 11	137.8	29.8	 16
 96	 11	103.8	16.8	 16
 97	 11	64.3	9.4	 16
 98	 11	107.8	15.6	 16
 99	 11	7181.8	697.1	 16
100	 11	7302.0	372.0	 16
101	 11	130.8	18.0	 16
102	 11	101.0	13.4	 16
103	 11	60.3	11.7	 16
104	 11	7680.0	606.9	 16
105	 11	136.3	23.5	 16
106	 11	111.3	15.4	 16
107	 11	122.8	25.7	 16
108	 11	7138.3	796.4	 16
109	 11	66.8	17.9	 16
110	 11	59.5	9.4	 16
111	 11	91.3	18.0	 16
112	 11	878.8	96.1	 16
113	 11	118.0	18.5	 16
114	 11	160.0	20.4	 16
115	 11	177.5	21.1	 16
116	 11	137.3	21.7	 16
117	 11	90.5	12.0	 16
118	 11	88.0	17.4	 16
119	 11	110.5	16.5	 16
120	 11	153.3	24.7	 16
121	 11	188.5	25.0	 16
122	 11	304.8	42.0	 16
123	 11	469.5	64.3	 16
124	 11	195.3	38.0	 16
125	 11	95.5	12.0	 16
126	 11	99.0	17.8	 20
127	 11	293.5	46.9	 16
128	 11	76.0	12.7	 16
129	 11	144.8	19.3	 16
130	 11	2459.3	479.8	 16
131	 11	92.0	16.1	 16
132	 11	138.8	34.1	 16
133	 11	93.5	13.7	 16
134	 11	146.0	23.6	 16
135	 11	144.3	23.5	 16
136	 11	71.5	14.5	 16
137	 11	76.8	13.4	 16
138	 11	63.5	10.5	 16
139	 11	99.3	11.0	 16
140	 11	62.3	10.8	 16
141	 11	117.0	15.6	 16
142	 11	564.0	73.0	 16
143	 11	470.8	58.6	 16
144	 11	80.0	11.4	 16
145	 11	87.0	13.0	 16
146	 11	233.3	32.7	 16
147	 11	74.3	8.8	 16
148	 11	83.5	15.3	 16
149	 11	136.0	17.1	 16
150	 11	103.5	12.0	 16
151	 11	114.3	14.4	 16
152	 11	150.0	28.2	 16
153	 11	1438.0	190.0	 16
154	 11	2253.0	277.0	 16
155	 11	395.5	53.5	 16
156	 11	80.0	13.5	 16
157	 11	326.0	33.8	 16
158	 11	618.8	41.3	 16
159	 11	216.5	26.9	 16
160	 11	70.0	9.2	 16
161	 11	345.5	35.6	 16
162	 11	83.8	11.9	 16
163	 11	78.0	22.5	 16
164	 11	79.5	17.8	 16
165	 11	86.5	10.8	 16
166	 11	426.0	31.8	 16
167	 11	76.3	10.1	 16
168	 11	75.3	13.3	 16
169	 11	82.8	19.1	 16
170	 11	299.0	64.3	 16
171	 11	83.0	17.7	 16
172	 11	114.5	18.8	 16
173	 11	129.3	25.6	 16
174	 11	150.5	20.4	 16
175	 11	193.8	23.4	 16
176	 11	148.5	22.3	 16
177	 11	99.8	18.3	 16
178	 11	219.3	27.6	 16
179	 11	118.0	16.7	 16
180	 11	103.3	14.4	 16
181	 11	660.3	83.4	 16
182	 11	151.5	25.9	 16
183	 11	71.3	11.4	 16
184	 11	89.3	16.0	 16
185	 11	75.0	14.6	 16
186	 11	78.3	15.9	 16
187	 11	243.3	32.6	 16
188	 11	152.8	28.3	 16
189	 11	214.0	28.1	 16
190	 11	120.3	16.7	 16
191	 11	99.8	16.7	 16
192	 11	150.3	21.4	 16
193	 11	62.3	10.0	 16
194	 11	93.3	16.3	 16
195	 11	89.0	18.6	 16
196	 11	235.0	28.5	 16
197	 11	96.8	21.8	 16
198	 11	256.0	35.7	 16
199	 11	215.3	29.1	 16
200	 11	92.8	15.1	 16
201	 11	81.8	14.6	 16
202	 11	717.3	91.9	 16
203	 11	85.0	13.2	 16
204	 11	66.0	10.8	 16
205	 11	68.3	10.8	 16
206	 11	74.0	12.7	 16
207	 11	68.3	18.6	 16
208	 11	211.5	29.3	 16
209	 11	176.5	23.6	 16
210	 11	142.3	22.9	 16
211	 11	78.0	15.0	 16
212	 11	108.5	15.8	 16
213	 11	191.3	21.5	 16
214	 11	188.5	23.2	 16
215	 11	470.0	51.8	 16
216	 11	225.3	27.8	 16
217	 11	92.3	15.8	 16
218	 11	123.5	14.6	 16
219	 11	106.5	12.1	 16
220	 11	84.0	16.7	 16
221	 11	284.8	38.8	 16
222	 11	767.5	94.8	 16
223	 11	108.8	17.5	 16
224	 11	86.5	14.9	 16
225	 11	257.8	38.3	 16
226	 11	174.3	27.6	 16
227	 11	83.5	15.2	 16
228	 11	88.3	15.7	 16
229	 11	140.5	19.2	 16
230	 11	164.3	17.0	 16
231	 11	200.3	28.4	 16
232	 11	175.5	24.8	 16
233	 11	98.5	20.9	 16
234	 11	90.5	16.3	 16
235	 11	148.5	20.0	 16
236	 11	195.5	28.0	 16
237	 11	108.0	19.2	 16
238	 11	94.5	12.2	 16
239	 11	142.3	18.0	 16
240	 11	900.0	94.9	 16
241	 11	159.5	27.8	 16
242	 11	365.3	56.7	 16
243	 11	85.3	11.8	 16
244	 11	74.3	9.9	 16
245	 11	135.3	22.8	 16
246	 11	86.5	19.2	 16
247	 11	79.0	15.6	 16
248	 11	759.0	66.6	 16
249	 11	150.3	22.0	 16
250	 11	226.8	33.8	 16
251	 11	104.5	16.9	 16
252	 11	86.3	12.2	 16
253	 11	113.0	17.9	 16
254	 11	106.5	26.3	 16
255	 11	73.3	10.8	 16
256	 11	74.5	12.4	 16
257	 11	68.0	15.0	 16
258	 11	166.3	18.6	 16
259	 11	116.5	16.1	 16
260	 11	86.3	15.7	 16
261	 11	78.3	14.0	 16
262	 11	78.3	9.9	 16
263	 11	157.3	28.6	 16
264	 11	67.3	9.4	 16
265	 11	96.0	16.3	 16
266	 11	226.0	31.9	 16
267	 11	169.3	24.2	 16
268	 11	146.0	17.7	 16
269	 11	126.0	22.0	 16
270	 11	130.8	21.8	 16
271	 11	205.5	16.2	 16
272	 11	74.0	13.3	 16
273	 11	96.5	15.7	 16
274	 11	180.3	24.7	 16
275	 11	120.3	20.8	 16
276	 11	117.3	19.3	 16
277	 11	152.3	25.0	 16
278	 11	391.0	48.1	 16
279	 11	280.0	52.0	 16
280	 11	133.5	19.4	 16
281	 11	99.5	17.0	 16
282	 11	150.3	19.2	 16
283	 11	190.8	31.9	 16
284	 11	72.3	15.6	 16
285	 11	91.0	11.8	 16
286	 11	179.3	22.8	 16
287	 11	277.5	50.6	 16
288	 11	1021.0	185.3	 16
289	 11	173.8	21.2	 16
290	 11	81.0	13.3	 16
291	 11	79.0	16.0	 16
292	 11	201.8	26.0	 16
293	 11	310.5	34.0	 16
294	 11	227.3	31.9	 16
295	 11	303.8	39.3	 16
296	 11	299.8	35.0	 16
297	 11	799.5	132.5	 12
298	 11	90.5	15.7	 16
299	 11	146.3	24.6	 16
300	 11	214.0	25.1	 16
301	 11	93.0	16.2	 16
302	 11	86.0	10.3	 16
303	 11	138.3	21.1	 16
304	 11	125.5	22.5	 20
305	 11	313.5	32.4	 16
306	 11	124.3	12.6	 16
307	 11	143.0	21.1	 16
308	 11	197.5	18.4	 16
309	 11	298.3	40.7	 16
310	 11	78.8	18.6	 16
311	 11	99.3	18.3	 16
312	 11	100.5	15.9	 16
313	 11	192.0	31.3	 16
314	 11	182.8	31.0	 16
315	 11	88.0	15.2	 16
316	 11	64.3	12.4	 16
317	 11	84.3	13.6	 16
318	 11	81.8	9.7	 16
319	 11	79.0	12.3	 16
320	 11	152.3	77.7	 16
321	 11	85.5	10.7	 16
322	 11	86.0	15.7	 16
323	 11	721.5	52.2	 16
324	 11	156.3	20.2	 16
325	 11	193.5	27.6	 16
326	 11	182.3	19.4	 16
327	 11	99.5	22.7	 16
328	 11	91.0	14.3	 16
329	 11	95.0	13.1	 16
330	 11	832.3	89.4	 16
331	 11	82.0	10.8	 16
332	 11	69.3	10.1	 16
333	 11	102.5	15.3	 16
334	 11	80.8	12.7	 16
335	 11	214.0	38.8	 16
336	 11	74.3	13.6	 16
337	 11	112.5	37.1	 16
338	 11	68.3	9.9	 16
339	 11	169.3	43.4	 16
340	 11	165.5	20.4	 16
341	 11	136.0	14.7	 16
342	 11	218.8	25.0	 16
343	 11	75.5	13.0	 16
344	 11	154.5	16.4	 16
345	 11	84.8	15.1	 16
346	 11	73.0	12.0	 16
347	 11	74.5	10.7	 16
348	 11	71.3	12.7	 16
349	 11	65.0	10.1	 16
350	 11	212.0	25.7	 16
351	 11	86.3	14.7	 16
352	 11	110.3	22.7	 16
353	 11	101.0	15.6	 16
354	 11	141.8	29.6	 16
355	 11	328.3	56.1	 16
356	 11	384.3	33.7	 16
357	 11	366.0	42.1	 16
358	 11	308.0	32.7	 16
359	 11	67.0	8.8	 16
360	 11	111.5	18.1	 16
361	 11	221.3	26.2	 16
362	 11	84.5	12.9	 16
363	 11	114.8	22.4	 16
364	 11	119.0	16.7	 16
365	 11	76.3	12.3	 16
366	 11	62.3	10.3	 16
367	 11	91.8	14.3	 16
368	 11	132.3	15.4	 16
369	 11	99.5	16.6	 16
370	 11	153.3	21.7	 16
371	 11	225.3	24.7	 16
372	 11	128.0	17.7	 16
373	 11	178.3	26.4	 16
374	 11	138.3	22.9	 16
375	 11	222.5	24.7	 16
376	 11	101.3	15.8	 16
377	 11	82.0	14.0	 16
378	 11	231.8	29.3	 16
379	 11	88.5	14.7	 16
380	 11	95.0	14.0	 16
381	 11	125.0	19.2	 16
382	 11	89.8	15.0	 16
383	 11	143.0	17.3	 16
384	 11	112.5	18.8	 16
385	 11	83.3	15.4	 16
386	 11	123.3	16.8	 16
387	 11	111.3	16.3	 16
388	 11	83.3	15.7	 16
389	 11	60.0	7.4	 16
390	 11	116.8	14.3	 16
391	 11	99.3	15.7	 16
392	 11	72.0	13.5	 16
393	 11	114.8	17.2	 16
394	 11	92.0	12.6	 16
395	 11	88.5	21.8	 16
396	 11	201.3	32.1	 16
397	 11	728.5	84.0	 16
398	 11	267.3	32.3	 16
399	 11	190.8	26.5	 16
400	 11	119.3	19.3	 16
401	 11	182.0	26.0	 16
402	 11	84.5	10.1	 16
403	 11	112.8	19.7	 16
404	 11	72.8	13.3	 16
405	 11	76.3	10.4	 16
406	 11	145.0	36.2	 16
407	 11	72.5	14.0	 16
408	 11	81.3	11.0	 16
409	 11	95.0	14.3	 16
410	 11	118.0	20.2	 16
411	 11	81.8	15.0	 16
412	 11	136.3	16.5	 16
413	 11	86.3	13.9	 16
414	 11	70.3	12.8	 16
415	 11	332.8	49.5	 16
416	 11	164.0	23.8	 16
417	 11	171.8	19.1	 16
418	 11	176.3	24.0	 16
419	 11	116.0	17.5	 16
420	 11	83.0	30.7	 16
421	 11	90.3	11.8	 16
422	 11	89.8	10.0	 16
423	 11	202.3	33.5	 16
424	 11	171.3	28.4	 16
425	 11	395.0	42.4	 16
426	 11	140.5	16.1	 16
427	 11	90.3	14.1	 16
428	 11	140.3	20.8	 16
429	 11	99.8	14.5	 16
430	 11	97.5	10.5	 16
431	 11	72.3	12.5	 16
432	 11	135.5	26.0	 16
433	 11	84.8	11.3	 16
434	 11	72.3	14.2	 16
435	 11	98.3	13.7	 16
436	 11	120.8	21.4	 16
437	 11	147.5	29.2	 16
438	 11	1333.0	215.5	 16
439	 11	158.8	29.7	 16
440	 11	95.3	13.3	 16
441	 11	134.8	26.5	 16
442	 11	123.8	21.6	 16
443	 11	248.3	29.0	 16
444	 11	66.0	10.4	 16
445	 11	191.5	31.5	 16
446	 11	88.8	12.8	 16
447	 11	118.0	18.1	 16
448	 11	101.8	13.8	 16
449	 11	78.5	15.0	 16
450	 11	158.3	28.4	 16
451	 11	151.0	12.4	 16
452	 11	99.5	14.9	 16
453	 11	81.3	8.5	 16
454	 11	87.8	15.1	 16
455	 11	185.0	34.7	 16
456	 11	77.3	13.4	 16
457	 11	168.3	27.6	 16
458	 11	151.5	28.6	 16
459	 11	116.5	20.4	 16
460	 11	176.0	35.0	 16
461	 11	71.0	11.9	 16
462	 11	84.0	13.0	 16
463	 11	238.8	37.2	 16
464	 11	179.5	25.0	 16
465	 11	78.3	13.1	 16
466	 11	86.0	15.8	 16
467	 11	70.3	16.3	 16
468	 11	134.0	14.4	 16
469	 11	576.3	77.9	 16
470	 11	99.8	18.6	 16
471	 11	133.5	41.1	 16
472	 11	185.0	25.2	 16
473	 11	83.0	12.9	 16
474	 11	83.3	10.2	 16
475	 11	79.0	11.8	 16
476	 11	132.3	17.3	 16
477	 11	76.3	14.7	 16
478	 11	115.3	16.6	 16
479	 11	124.3	27.3	 16
480	 11	80.0	12.9	 16
481	 11	296.8	40.8	 16
482	 11	118.0	18.8	 20
483	 11	89.0	10.4	 16
484	 11	73.0	11.9	 16
485	 11	77.0	12.1	 16
486	 11	296.3	39.6	 16
487	 11	154.0	28.3	 16
488	 11	85.3	13.4	 16
489	 11	64.8	12.5	 16
490	 11	88.8	15.8	 16
491	 11	81.0	13.1	 16
492	 11	102.3	17.2	 16
493	 11	90.0	12.0	 16
494	 11	205.0	21.9	 16
495	 11	83.8	14.7	 16
496	 11	434.0	48.2	 16
497	 11	416.0	42.1	 16
498	 11	413.0	50.2	 16
499	 11	257.0	33.6	 16
500	 11	129.0	13.9	 16
501	 11	91.8	11.8	 16
502	 11	74.3	13.2	 16
503	 11	81.3	13.3	 16
504	 11	414.3	70.3	 16
505	 11	89.0	14.1	 16
506	 11	76.5	12.5	 16
507	 11	67.3	11.5	 16
508	 11	69.5	10.2	 16
509	 11	64.0	9.4	 16
510	 11	121.0	17.3	 16
511	 11	129.3	13.8	 16
512	 11	76.3	11.0	 16
513	 11	117.5	36.2	 16
514	 11	135.3	20.4	 16
515	 11	80.5	9.5	 16
516	 11	108.0	15.9	 16
517	 11	295.0	32.5	 16
518	 11	91.3	19.9	 16
519	 11	330.5	42.0	 16
520	 11	633.0	103.2	 16
521	 11	348.3	65.2	 16
522	 11	88.0	118.7	 16
523	 11	70.8	12.6	 16
524	 11	106.5	16.0	 16
525	 11	76.5	15.2	 16
526	 11	69.0	12.3	 16
527	 11	88.0	14.2	 16
528	 11	73.3	9.7	 16
529	 11	130.3	16.6	 16
530	 11	92.8	16.9	 16
531	 11	76.3	13.1	 16
532	 11	178.5	31.3	 16
533	 11	86.5	11.2	 16
534	 11	76.0	11.9	 16
535	 11	86.3	14.0	 16
536	 11	341.3	64.9	 16
537	 11	344.5	50.6	 16
538	 11	172.0	24.0	 16
539	 11	395.5	52.3	 16
540	 11	610.3	73.1	 16
541	 11	119.8	21.1	 16
542	 11	76.8	11.2	 16
543	 11	130.0	22.9	 16
544	 11	78.0	14.2	 16
545	 11	152.8	29.4	 16
546	 11	91.3	19.8	 16
547	 11	172.5	24.8	 16
548	 11	115.8	23.5	 16
549	 11	70.5	10.8	 16
550	 11	223.3	31.1	 16
551	 11	101.3	17.4	 16
552	 11	79.3	12.7	 16
553	 11	113.0	17.8	 16
554	 11	540.5	99.8	 16
555	 11	131.3	19.8	 16
556	 11	282.3	41.5	 16
557	 11	89.3	14.0	 16
558	 11	1313.8	191.4	 16
559	 11	126.0	14.2	 16
560	 11	250.3	30.2	 16
561	 11	505.3	39.0	 16
562	 11	359.0	42.5	 16
563	 11	136.0	20.7	 16
564	 11	231.8	50.1	 16
565	 11	297.5	62.2	 16
566	 11	84.8	13.2	 16
567	 11	104.3	17.3	 16
568	 11	133.8	24.8	 16
569	 11	120.5	17.5	 16
570	 11	2096.0	461.4	 16
571	 11	218.8	29.0	 16
572	 11	74.3	14.5	 16
573	 11	75.3	16.2	 16
574	 11	91.8	12.1	 16
575	 11	92.3	11.9	 16
576	 11	88.3	16.2	 16
577	 11	129.0	24.5	 16
578	 11	119.0	23.3	 16
579	 11	482.8	111.0	 16
580	 11	94.0	11.0	 16
581	 11	263.8	69.5	 16
582	 11	84.5	16.1	 16
583	 11	139.0	25.0	 16
584	 11	74.8	12.8	 16
585	 11	167.0	30.4	 16
586	 11	133.3	37.3	 16
587	 11	217.3	20.0	 16
588	 11	79.0	11.6	 16
589	 11	284.3	59.0	 16
590	 11	123.0	27.5	 16
591	 11	142.5	22.2	 16
592	 11	172.5	30.1	 16
593	 11	76.5	14.9	 16
594	 11	244.3	57.7	 16
595	 11	135.8	17.8	 16
596	 11	297.0	58.3	 16
597	 11	209.8	31.8	 16
598	 11	102.8	16.4	 16
599	 11	151.3	20.3	 16
600	 11	90.0	19.1	 16
601	 11	137.8	26.7	 16
602	 11	145.0	18.1	 16
603	 11	121.8	18.7	 16
604	 11	483.8	108.9	 16
605	 11	81.8	20.5	 16
606	 11	87.3	12.6	 16
607	 11	80.3	23.7	 16
608	 11	78.5	13.4	 16
609	 11	81.0	15.7	 16
610	 11	64.3	11.0	 16
611	 11	243.5	45.6	 16
612	 11	193.5	24.8	 16
613	 11	138.3	15.2	 16
614	 11	164.5	26.1	 16
615	 11	104.3	14.9	 16
616	 11	72.0	13.0	 16
617	 11	84.0	10.6	 16
618	 11	88.0	14.2	 16
619	 11	206.8	24.0	 16
620	 11	93.3	47.5	 16
621	 11	65.3	10.0	 16
622	 11	75.0	13.2	 16
623	 11	62.8	10.2	 16
624	 11	89.0	14.6	 16
625	 11	90.0	21.7	 16
626	 11	90.5	15.7	 16
627	 11	220.8	46.7	 16
628	 11	125.3	21.0	 16
629	 11	62.5	7.6	 16
630	 11	82.8	14.9	 16
631	 11	221.3	47.8	 16
632	 11	167.3	27.5	 16
633	 11	110.0	19.2	 16
634	 11	227.8	29.0	 16
635	 11	94.3	14.8	 16
636	 11	70.3	13.9	 16
637	 11	131.8	27.0	 16
638	 11	97.5	17.3	 16
639	 11	68.0	8.1	 16
640	 11	96.0	14.2	 16
641	 11	118.5	17.8	 16
642	 11	84.5	11.9	 16
643	 11	206.8	32.2	 16
644	 11	139.8	30.6	 16
645	 11	98.0	16.6	 16
646	 11	96.0	21.6	 16
647	 11	90.5	13.8	 16
648	 11	114.3	15.1	 16
649	 11	177.5	24.8	 16
650	 11	77.5	11.1	 16
651	 11	109.5	21.0	 16
652	 11	104.8	22.6	 16
653	 11	64.5	11.2	 16
654	 11	67.3	10.5	 16
655	 11	86.5	11.3	 16
656	 11	67.0	9.9	 16
657	 11	58.8	8.0	 16
658	 11	231.8	53.6	 16
659	 11	78.0	12.4	 16
660	 11	80.5	14.5	 20
661	 11	67.8	12.3	 16
662	 11	90.3	13.6	 16
663	 11	955.3	93.1	 16
664	 11	267.8	33.3	 16
665	 11	171.5	11.4	 16
666	 11	241.3	32.3	 16
667	 11	78.5	12.8	 16
668	 11	193.5	33.3	 16
669	 11	232.3	18.2	 16
670	 11	135.3	21.3	 16
671	 11	807.5	78.9	 16
672	 11	273.0	40.0	 16
673	 11	96.3	14.0	 16
674	 11	91.5	13.5	 16
675	 11	94.0	15.3	 16
676	 11	82.5	14.2	 16
677	 11	244.8	41.3	 16
678	 11	336.3	40.3	 16
679	 11	138.8	20.4	 16
680	 11	176.5	28.0	 16
681	 11	96.5	10.7	 16
682	 11	526.3	83.2	 16
683	 11	174.3	16.6	 16
684	 11	392.5	38.3	 16
685	 11	172.8	19.4	 16
686	 11	96.0	12.5	 16
687	 11	74.8	9.3	 16
688	 11	89.8	16.6	 16
689	 11	71.5	12.7	 16
690	 11	75.0	8.8	 16
691	 11	68.0	18.4	 16
692	 11	90.5	48.6	 16
693	 11	69.3	12.3	 16
694	 11	146.3	23.3	 16
695	 11	111.3	11.8	 16
696	 11	57.3	7.0	 16
697	 11	383.8	58.9	 16
698	 11	168.5	24.4	 16
699	 11	259.5	40.1	 16
700	 11	112.8	23.2	 16
701	 11	168.3	19.5	 16
702	 11	176.3	25.4	 16
703	 11	161.8	24.1	 16
704	 11	77.8	38.1	 16
705	 11	166.3	23.6	 16
706	 11	126.3	24.3	 16
707	 11	114.5	16.1	 16
708	 11	108.5	21.4	 16
709	 11	124.0	19.1	 16
710	 11	154.8	21.0	 16
711	 11	159.8	34.0	 16
  0	 12	8211.8	743.2	 16
  1	 12	111.8	16.8	 16
  2	 12	69.5	9.2	 16
  3	 12	72.8	14.3	 16
  4	 12	67.0	10.5	 16
  5	 12	84.5	13.5	 16
  6	 12	59.5	8.9	 16
  7	 12	129.3	16.8	 16
  8	 12	121.5	18.8	 16
  9	 12	73.0	9.3	 16
 10	 12	81.8	15.4	 16
 11	 12	57.3	9.5	 16
 12	 12	55.8	8.8	 16
 13	 12	78.8	14.8	 16
 14	 12	89.0	19.0	 16
 15	 12	69.5	11.4	 16
 16	 12	54.3	12.2	 16
 17	 12	49.5	7.6	 16
 18	 12	64.0	12.6	 16
 19	 12	63.5	16.0	 16
 20	 12	63.0	13.7	 16
 21	 12	74.3	13.1	 16
 22	 12	52.5	9.2	 16
 23	 12	54.5	7.1	 16
 24	 12	52.0	11.4	 16
 25	 12	60.5	12.0	 16
 26	 12	58.3	9.5	 16
 27	 12	65.3	14.8	 16
 28	 12	65.8	13.5	 16
 29	 12	53.3	13.7	 16
 30	 12	58.5	11.1	 16
 31	 12	59.8	12.1	 16
 32	 12	52.5	9.5	 16
 33	 12	60.3	10.1	 16
 34	 12	70.3	14.3	 16
 35	 12	61.3	9.7	 16
 36	 12	73.0	14.2	 16
 37	 12	59.0	16.0	 16
 38	 12	53.3	8.0	 16
 39	 12	62.0	10.0	 16
 40	 12	53.8	10.7	 16
 41	 12	59.5	9.4	 16
 42	 12	60.8	8.6	 16
 43	 12	63.5	10.9	 16
 44	 12	58.0	8.6	 16
 45	 12	60.3	9.2	 16
 46	 12	59.0	14.4	 16
 47	 12	54.8	9.9	 16
 48	 12	62.3	13.5	 16
 49	 12	61.8	8.9	 16
 50	 12	62.3	11.2	 16
 51	 12	107.0	34.6	 16
 52	 12	63.0	16.8	 16
 53	 12	68.3	22.6	 16
 54	 12	61.5	9.7	 16
 55	 12	54.8	9.7	 16
 56	 12	60.0	7.9	 16
 57	 12	62.5	9.4	 16
 58	 12	60.3	13.4	 16
 59	 12	61.0	10.3	 16
 60	 12	64.0	12.0	 16
 61	 12	55.5	9.1	 16
 62	 12	65.8	16.8	 16
 63	 12	63.8	11.8	 16
 64	 12	59.3	11.4	 16
 65	 12	51.3	9.8	 16
 66	 12	55.0	11.4	 16
 67	 12	64.3	10.9	 16
 68	 12	52.5	9.4	 16
 69	 12	64.0	14.3	 16
 70	 12	66.3	20.2	 16
 71	 12	57.3	10.6	 16
 72	 12	64.5	10.8	 16
 73	 12	53.5	13.1	 16
 74	 12	65.3	14.3	 16
 75	 12	56.5	8.1	 16
 76	 12	61.0	7.0	 16
 77	 12	74.0	15.7	 16
 78	 12	65.8	11.4	 16
 79	 12	52.5	10.5	 16
 80	 12	66.3	11.3	 16
 81	 12	57.3	7.6	 16
 82	 12	72.5	16.4	 16
 83	 12	66.3	9.4	 16
 84	 12	56.3	9.3	 16
 85	 12	60.3	10.2	 16
 86	 12	57.5	12.1	 16
 87	 12	82.5	17.2	 16
 88	 12	70.8	20.5	 16
 89	 12	62.0	9.8	 16
 90	 12	62.0	10.4	 16
 91	 12	57.5	8.6	 16
 92	 12	65.3	9.7	 16
 93	 12	68.3	13.3	 16
 94	 12	61.5	11.2	 16
 95	 12	59.0	12.8	 16
 96	 12	64.3	9.8	 16
 97	 12	57.5	11.0	 16
 98	 12	57.0	7.4	 16
 99	 12	67.0	13.3	 16
100	 12	62.8	11.7	 16
101	 12	64.8	11.0	 16
102	 12	60.5	11.9	 16
103	 12	54.8	11.1	 16
104	 12	65.0	15.1	 16
105	 12	53.8	9.0	 16
106	 12	59.5	11.4	 16
107	 12	66.8	9.4	 16
108	 12	61.3	7.7	 16
109	 12	56.3	8.2	 16
110	 12	61.3	12.2	 16
111	 12	79.8	10.4	 16
112	 12	125.3	13.6	 16
113	 12	303.0	38.5	 16
114	 12	159.3	26.4	 16
115	 12	145.0	26.7	 16
116	 12	137.0	28.3	 16
117	 12	87.5	13.8	 16
118	 12	77.3	10.9	 16
119	 12	93.8	13.3	 16
120	 12	105.8	14.0	 16
121	 12	89.5	20.8	 16
122	 12	106.8	15.5	 16
123	 12	142.0	20.6	 16
124	 12	241.0	23.5	 16
125	 12	75.0	12.8	 16
126	 12	87.5	14.7	 16
127	 12	140.5	22.9	 16
128	 12	64.5	11.1	 16
129	 12	109.0	14.9	 16
130	 12	210.5	34.5	 16
131	 12	80.0	10.0	 16
132	 12	94.3	15.8	 16
133	 12	95.3	18.7	 16
134	 12	83.3	18.3	 16
135	 12	134.5	22.3	 16
136	 12	69.5	11.8	 16
137	 12	70.0	10.8	 16
138	 12	72.3	9.1	 16
139	 12	68.0	11.6	 16
140	 12	68.5	8.5	 16
141	 12	110.0	21.1	 16
142	 12	167.3	32.1	 16
143	 12	180.0	24.6	 16
144	 12	81.0	12.7	 16
145	 12	73.3	12.0	 20
146	 12	72.0	12.4	 16
147	 12	80.0	11.5	 16
148	 12	81.3	17.3	 16
149	 12	103.8	52.0	 16
150	 12	79.5	15.0	 16
151	 12	178.3	29.6	 16
152	 12	107.3	12.4	 16
153	 12	227.8	25.9	 16
154	 12	555.3	61.5	 16
155	 12	75.3	12.0	 16
156	 12	80.5	15.1	 16
157	 12	141.5	19.6	 16
158	 12	516.5	30.8	 16
159	 12	132.5	18.9	 16
160	 12	86.5	15.9	 16
161	 12	125.5	12.1	 16
162	 12	60.5	9.6	 16
163	 12	76.0	19.8	 16
164	 12	74.3	10.8	 16
165	 12	85.8	18.7	 16
166	 12	124.5	23.5	 16
167	 12	66.3	10.0	 16
168	 12	67.0	9.7	 16
169	 12	80.0	13.9	 16
170	 12	139.5	24.9	 16
171	 12	73.3	9.2	 16
172	 12	113.3	22.1	 16
173	 12	126.5	53.9	 16
174	 12	76.0	10.5	 16
175	 12	106.5	15.8	 16
176	 12	115.5	22.9	 16
177	 12	139.3	18.7	 16
178	 12	98.3	21.9	 16
179	 12	91.3	17.2	 16
180	 12	94.3	12.3	 16
181	 12	158.8	21.6	 16
182	 12	116.3	16.9	 16
183	 12	80.3	13.0	 16
184	 12	81.5	18.4	 16
185	 12	81.8	13.7	 16
186	 12	79.3	11.1	 16
187	 12	192.8	22.0	 16
188	 12	91.5	11.6	 16
189	 12	129.3	13.1	 16
190	 12	85.5	14.0	 16
191	 12	81.3	13.4	 16
192	 12	124.3	22.4	 16
193	 12	71.5	15.3	 16
194	 12	94.8	11.4	 16
195	 12	75.0	11.4	 16
196	 12	114.0	20.8	 16
197	 12	73.3	9.6	 16
198	 12	86.0	12.9	 16
199	 12	229.0	35.0	 16
200	 12	72.0	13.3	 16
201	 12	91.3	18.3	 16
202	 12	99.5	17.1	 16
203	 12	71.3	11.1	 16
204	 12	74.0	12.1	 16
205	 12	69.5	9.6	 16
206	 12	69.5	12.5	 16
207	 12	70.5	16.4	 16
208	 12	78.3	22.9	 16
209	 12	105.8	12.3	 16
210	 12	84.0	15.7	 16
211	 12	78.8	15.8	 16
212	 12	143.3	26.6	 16
213	 12	116.0	19.8	 16
214	 12	172.0	36.2	 16
215	 12	416.8	54.5	 16
216	 12	239.5	28.5	 16
217	 12	98.0	12.9	 16
218	 12	77.8	15.2	 16
219	 12	92.3	17.1	 16
220	 12	81.0	12.5	 16
221	 12	131.8	21.8	 16
222	 12	247.8	35.3	 16
223	 12	88.5	18.3	 16
224	 12	84.5	12.7	 16
225	 12	99.3	17.2	 16
226	 12	82.0	12.7	 16
227	 12	65.3	12.0	 16
228	 12	80.5	12.9	 16
229	 12	171.8	17.0	 16
230	 12	203.3	27.6	 12
231	 12	137.3	20.3	 16
232	 12	115.3	24.6	 16
233	 12	85.3	10.4	 16
234	 12	89.3	16.4	 16
235	 12	135.8	15.2	 16
236	 12	145.5	21.8	 16
237	 12	95.8	18.9	 16
238	 12	119.8	17.3	 16
239	 12	97.3	16.6	 16
240	 12	163.5	32.0	 16
241	 12	98.0	18.6	 16
242	 12	103.3	22.6	 16
243	 12	78.0	14.2	 16
244	 12	80.5	15.0	 16
245	 12	77.0	9.1	 16
246	 12	71.3	12.2	 16
247	 12	81.3	10.4	 16
248	 12	93.3	11.6	 16
249	 12	87.3	12.3	 16
250	 12	80.0	10.7	 16
251	 12	101.3	15.4	 16
252	 12	91.0	16.7	 16
253	 12	96.3	17.8	 16
254	 12	80.8	11.4	 16
255	 12	72.3	12.7	 16
256	 12	69.3	13.5	 16
257	 12	66.8	9.8	 16
258	 12	120.0	17.7	 16
259	 12	111.5	18.9	 16
260	 12	98.5	35.5	 16
261	 12	72.0	6.9	 16
262	 12	77.0	9.8	 16
263	 12	78.3	9.8	 16
264	 12	75.3	10.3	 16
265	 12	70.0	12.6	 16
266	 12	325.3	38.7	 16
267	 12	141.3	15.4	 16
268	 12	111.8	17.4	 16
269	 12	115.5	16.2	 16
270	 12	109.0	15.4	 16
271	 12	115.3	21.5	 16
272	 12	82.8	11.3	 16
273	 12	73.5	11.7	 16
274	 12	140.5	17.6	 16
275	 12	194.8	33.8	 16
276	 12	84.3	13.6	 16
277	 12	80.0	26.5	 16
278	 12	107.5	17.5	 16
279	 12	127.3	19.0	 16
280	 12	97.3	14.0	 16
281	 12	94.0	15.2	 16
282	 12	155.8	18.8	 16
283	 12	108.8	20.1	 16
284	 12	70.3	9.5	 16
285	 12	61.8	10.4	 16
286	 12	106.0	13.5	 16
287	 12	115.8	12.1	 16
288	 12	295.5	51.8	 16
289	 12	127.3	18.4	 16
290	 12	81.0	14.0	 16
291	 12	72.3	17.1	 16
292	 12	83.3	13.2	 16
293	 12	103.5	15.7	 16
294	 12	77.3	10.0	 16
295	 12	171.0	32.8	 16
296	 12	185.3	20.6	 16
297	 12	130.5	25.7	 16
298	 12	87.0	13.9	 16
299	 12	137.5	30.5	 16
300	 12	115.3	20.8	 16
301	 12	92.3	16.6	 16
302	 12	105.0	16.5	 16
303	 12	119.0	14.3	 16
304	 12	127.0	15.1	 16
305	 12	496.5	38.5	 16
306	 12	154.3	31.0	 16
307	 12	114.8	14.0	 16
308	 12	163.8	22.0	 16
309	 12	253.0	23.4	 16
310	 12	88.3	11.5	 16
311	 12	105.3	16.2	 16
312	 12	79.3	11.8	 16
313	 12	234.0	35.6	 16
314	 12	81.3	15.7	 16
315	 12	77.3	10.7	 16
316	 12	68.0	13.4	 16
317	 12	83.3	15.0	 16
318	 12	75.0	11.7	 16
319	 12	83.0	12.9	 16
320	 12	71.3	7.6	 16
321	 12	76.5	14.7	 16
322	 12	72.5	13.8	 16
323	 12	194.0	26.5	 20
324	 12	218.3	24.4	 16
325	 12	77.3	10.4	 16
326	 12	84.5	10.8	 16
327	 12	88.8	16.8	 16
328	 12	76.0	13.7	 16
329	 12	100.3	19.4	 16
330	 12	194.0	29.5	 16
331	 12	84.0	16.7	 16
332	 12	75.3	7.2	 16
333	 12	85.3	17.7	 16
334	 12	70.0	11.6	 16
335	 12	108.5	16.3	 16
336	 12	60.0	6.8	 16
337	 12	78.3	12.1	 16
338	 12	65.0	9.0	 16
339	 12	69.0	12.1	 16
340	 12	79.5	10.0	 16
341	 12	158.3	28.0	 16
342	 12	111.8	18.8	 16
343	 12	77.3	14.4	 16
344	 12	97.8	14.1	 16
345	 12	91.0	14.8	 16
346	 12	74.3	14.7	 16
347	 12	73.0	12.2	 16
348	 12	73.8	10.8	 16
349	 12	68.3	11.6	 16
350	 12	386.0	44.9	 16
351	 12	67.3	10.7	 16
352	 12	84.0	12.2	 16
353	 12	151.3	24.2	 16
354	 12	140.3	15.8	 16
355	 12	200.0	18.2	 16
356	 12	212.5	20.9	 16
357	 12	113.8	17.7	 16
358	 12	87.0	11.8	 16
359	 12	76.5	14.8	 16
360	 12	117.5	18.5	 16
361	 12	345.8	44.1	 16
362	 12	87.0	16.6	 16
363	 12	77.3	13.1	 16
364	 12	83.5	22.4	 16
365	 12	72.3	8.6	 16
366	 12	79.3	11.4	 16
367	 12	73.5	12.1	 16
368	 12	68.3	8.6	 16
369	 12	109.0	22.4	 16
370	 12	89.8	15.0	 16
371	 12	216.5	20.8	 16
372	 12	155.5	19.0	 16
373	 12	72.0	11.9	 16
374	 12	68.5	10.7	 16
375	 12	161.8	22.5	 16
376	 12	90.0	14.8	 16
377	 12	95.3	14.0	 16
378	 12	109.5	31.9	 16
379	 12	84.0	13.9	 16
380	 12	84.3	39.3	 16
381	 12	96.5	16.8	 16
382	 12	111.0	18.5	 16
383	 12	77.5	13.0	 16
384	 12	120.8	22.8	 16
385	 12	62.8	9.0	 16
386	 12	78.5	14.8	 16
387	 12	78.8	13.6	 16
388	 12	73.3	12.1	 16
389	 12	64.8	11.7	 16
390	 12	82.8	11.6	 16
391	 12	61.5	11.0	 16
392	 12	73.0	10.2	 16
393	 12	77.5	11.0	 16
394	 12	84.0	12.8	 16
395	 12	72.3	14.0	 16
396	 12	120.3	19.8	 16
397	 12	361.0	33.6	 16
398	 12	196.3	21.0	 16
399	 12	115.5	15.6	 16
400	 12	114.3	17.2	 16
401	 12	95.8	12.5	 16
402	 12	87.5	10.9	 16
403	 12	83.5	12.8	 16
404	 12	74.0	14.6	 16
405	 12	71.0	10.2	 16
406	 12	80.3	14.9	 16
407	 12	78.0	36.9	 16
408	 12	88.0	15.5	 16
409	 12	117.3	18.2	 16
410	 12	182.8	26.8	 16
411	 12	92.5	15.2	 16
412	 12	82.3	14.1	 16
413	 12	77.0	14.5	 16
414	 12	72.3	11.4	 16
415	 12	154.5	27.5	 16
416	 12	115.8	18.6	 16
417	 12	111.3	12.4	 16
418	 12	146.8	17.6	 16
419	 12	107.8	18.0	 16
420	 12	63.5	11.0	 16
421	 12	115.3	17.5	 16
422	 12	81.5	15.6	 16
423	 12	98.0	11.5	 16
424	 12	247.3	24.6	 16
425	 12	240.8	25.4	 16
426	 12	177.3	17.6	 16
427	 12	89.0	9.3	 16
428	 12	80.3	11.9	 16
429	 12	81.3	10.7	 16
430	 12	97.0	17.2	 16
431	 12	72.5	12.7	 16
432	 12	73.3	11.6	 16
433	 12	85.3	10.8	 16
434	 12	69.0	9.5	 16
435	 12	70.8	12.9	 16
436	 12	89.8	17.6	 16
437	 12	82.0	12.1	 16
438	 12	405.3	54.5	 16
439	 12	100.5	12.6	 16
440	 12	82.0	11.3	 16
441	 12	250.5	26.6	 16
442	 12	81.0	12.6	 16
443	 12	124.3	18.2	 16
444	 12	73.3	10.7	 16
445	 12	158.8	22.1	 16
446	 12	87.3	15.2	 16
447	 12	120.0	37.0	 16
448	 12	84.0	13.1	 16
449	 12	83.5	12.1	 16
450	 12	90.3	15.9	 16
451	 12	94.3	15.0	 16
452	 12	72.0	15.9	 16
453	 12	73.8	14.0	 16
454	 12	90.0	16.3	 16
455	 12	62.0	12.5	 16
456	 12	83.3	16.3	 16
457	 12	159.5	20.9	 16
458	 12	143.5	27.2	 16
459	 12	83.5	12.1	 16
460	 12	71.8	14.2	 16
461	 12	107.0	20.6	 16
462	 12	129.0	16.7	 16
463	 12	320.5	31.4	 16
464	 12	128.0	33.1	 16
465	 12	72.3	10.3	 16
466	 12	82.0	13.2	 16
467	 12	64.5	11.2	 16
468	 12	81.0	15.3	 16
469	 12	203.3	19.5	 16
470	 12	102.0	12.9	 16
471	 12	153.5	16.1	 16
472	 12	182.8	24.1	 16
473	 12	92.8	18.4	 16
474	 12	67.3	10.1	 16
475	 12	65.3	6.9	 16
476	 12	82.8	16.2	 16
477	 12	73.3	10.6	 16
478	 12	81.5	9.7	 16
479	 12	89.0	13.3	 16
480	 12	94.5	16.4	 16
481	 12	148.0	16.4	 16
482	 12	99.5	16.3	 16
483	 12	74.0	12.4	 16
484	 12	68.8	12.2	 16
485	 12	77.8	11.9	 16
486	 12	113.3	15.8	 16
487	 12	85.5	15.9	 16
488	 12	73.5	13.9	 16
489	 12	70.3	14.4	 16
490	 12	77.3	13.7	 16
491	 12	79.8	18.7	 16
492	 12	84.8	12.4	 16
493	 12	72.0	10.4	 16
494	 12	377.0	44.3	 16
495	 12	80.3	14.2	 16
496	 12	2065.3	198.8	 16
497	 12	2247.5	157.9	 16
498	 12	2178.5	175.9	 16
499	 12	214.0	35.2	 16
500	 12	91.3	10.6	 16
501	 12	83.8	16.2	 20
502	 12	72.3	8.5	 16
503	 12	78.3	11.9	 16
504	 12	113.3	12.8	 16
505	 12	75.0	9.3	 16
506	 12	70.8	10.1	 16
507	 12	73.3	11.7	 16
508	 12	78.5	14.8	 16
509	 12	75.8	14.2	 16
510	 12	108.3	23.1	 16
511	 12	180.5	25.7	 16
512	 12	77.3	9.6	 16
513	 12	126.5	16.7	 16
514	 12	125.5	13.7	 16
515	 12	86.5	13.2	 16
516	 12	77.3	13.6	 16
517	 12	99.3	14.9	 16
518	 12	74.5	37.8	 16
519	 12	86.8	14.8	 16
520	 12	84.5	14.5	 16
521	 12	113.5	15.8	 16
522	 12	74.3	13.2	 16
523	 12	64.5	12.1	 16
524	 12	234.0	31.1	 16
525	 12	72.0	12.5	 16
526	 12	69.3	11.5	 16
527	 12	64.3	12.6	 16
528	 12	77.3	11.9	 16
529	 12	169.0	11.0	 16
530	 12	70.8	11.6	 16
531	 12	62.3	9.7	 16
532	 12	86.0	20.2	 16
533	 12	98.3	21.7	 16
534	 12	71.3	11.8	 16
535	 12	88.5	21.6	 16
536	 12	123.3	19.8	 16
537	 12	136.3	18.5	 16
538	 12	113.5	16.4	 16
539	 12	260.0	30.3	 16
540	 12	161.8	23.4	 16
541	 12	140.5	15.9	 16
542	 12	141.3	16.3	 16
543	 12	105.3	14.0	 16
544	 12	71.0	6.4	 16
545	 12	78.0	12.6	 16
546	 12	77.5	13.0	 16
547	 12	113.3	17.1	 16
548	 12	113.5	17.8	 16
549	 12	76.3	14.8	 16
550	 12	85.5	14.3	 16
551	 12	70.5	10.4	 16
552	 12	67.0	8.4	 16
553	 12	81.8	12.3	 16
554	 12	144.0	22.2	 16
555	 12	86.3	10.3	 16
556	 12	101.3	11.6	 16
557	 12	70.5	9.3	 16
558	 12	190.8	30.9	 16
559	 12	93.3	12.8	 16
560	 12	352.3	41.2	 16
561	 12	364.8	36.8	 16
562	 12	138.5	24.0	 16
563	 12	107.0	17.5	 16
564	 12	127.5	20.9	 16
565	 12	145.0	17.3	 16
566	 12	92.8	12.8	 16
567	 12	124.0	19.8	 16
568	 12	88.3	14.6	 16
569	 12	75.3	16.5	 16
570	 12	285.3	53.0	 16
571	 12	155.5	16.6	 16
572	 12	75.3	12.2	 16
573	 12	67.8	11.5	 16
574	 12	74.8	11.9	 16
575	 12	78.0	12.5	 16
576	 12	76.0	14.5	 16
577	 12	93.5	13.2	 16
578	 12	123.3	12.6	 16
579	 12	160.5	26.9	 16
580	 12	102.3	22.2	 16
581	 12	173.5	29.7	 16
582	 12	74.5	13.6	 16
583	 12	164.5	19.4	 16
584	 12	107.8	16.7	 16
585	 12	267.0	66.5	 16
586	 12	313.0	60.4	 16
587	 12	113.3	28.6	 16
588	 12	74.0	14.0	 16
589	 12	104.8	16.6	 16
590	 12	106.8	16.9	 16
591	 12	99.8	16.2	 16
592	 12	122.3	16.5	 16
593	 12	78.3	15.7	 16
594	 12	220.3	26.1	 16
595	 12	108.5	13.9	 16
596	 12	131.0	27.7	 16
597	 12	118.8	18.1	 16
598	 12	128.8	17.6	 16
599	 12	116.0	16.7	 16
600	 12	261.3	36.8	 16
601	 12	118.8	19.5	 16
602	 12	128.5	25.5	 16
603	 12	103.0	17.3	 16
604	 12	97.5	13.6	 16
605	 12	74.0	11.0	 16
606	 12	74.5	9.7	 16
607	 12	65.3	9.2	 16
608	 12	71.8	13.0	 16
609	 12	70.3	13.0	 16
610	 12	70.0	12.4	 16
611	 12	73.8	9.7	 16
612	 12	90.0	13.5	 16
613	 12	147.3	24.1	 16
614	 12	94.8	11.0	 16
615	 12	92.8	16.8	 16
616	 12	66.0	8.4	 16
617	 12	79.5	10.9	 16
618	 12	75.3	8.0	 16
619	 12	253.8	30.4	 16
620	 12	67.3	15.8	 16
621	 12	68.3	12.2	 16
622	 12	66.3	9.4	 16
623	 12	75.5	11.9	 16
624	 12	72.0	13.5	 16
625	 12	60.5	8.8	 16
626	 12	77.5	19.3	 16
627	 12	77.3	11.9	 16
628	 12	93.8	17.3	 16
629	 12	72.8	25.6	 16
630	 12	72.5	10.9	 16
631	 12	85.5	9.4	 16
632	 12	99.0	13.4	 16
633	 12	100.3	18.8	 16
634	 12	154.0	18.1	 16
635	 12	74.3	10.1	 16
636	 12	69.0	14.4	 16
637	 12	72.5	10.9	 16
638	 12	80.0	14.7	 16
639	 12	63.8	14.7	 16
640	 12	151.5	30.6	 16
641	 12	99.3	23.3	 16
642	 12	76.5	20.2	 16
643	 12	107.5	27.7	 16
644	 12	105.0	18.6	 16
645	 12	76.0	14.2	 16
646	 12	89.5	9.2	 16
647	 12	97.0	13.9	 16
648	 12	104.3	15.0	 16
649	 12	142.5	23.5	 16
650	 12	82.3	11.4	 16
651	 12	67.8	9.5	 16
652	 12	70.3	15.7	 16
653	 12	61.8	12.2	 16
654	 12	69.3	8.4	 16
655	 12	79.5	12.3	 16
656	 12	63.0	12.8	 16
657	 12	68.3	7.9	 16
658	 12	101.3	15.4	 16
659	 12	76.3	9.0	 16
660	 12	71.3	12.3	 16
661	 12	72.0	11.0	 16
662	 12	96.8	15.1	 16
663	 12	194.0	34.5	 16
664	 12	125.5	18.4	 16
665	 12	78.5	12.7	 16
666	 12	141.0	22.4	 16
667	 12	65.3	10.3	 16
668	 12	100.3	13.5	 16
669	 12	113.3	10.9	 16
670	 12	99.8	15.0	 16
671	 12	212.5	36.9	 16
672	 12	314.0	24.0	 16
673	 12	76.3	12.9	 16
674	 12	92.5	19.0	 16
675	 12	78.0	9.1	 16
676	 12	76.3	14.8	 16
677	 12	75.0	10.6	 16
678	 12	115.3	14.7	 16
679	 12	147.3	23.6	 20
680	 12	208.0	29.0	 16
681	 12	147.5	21.8	 16
682	 12	136.8	18.5	 16
683	 12	149.3	18.7	 16
684	 12	125.3	15.9	 16
685	 12	171.5	20.9	 16
686	 12	93.3	11.3	 16
687	 12	63.3	9.4	 16
688	 12	76.8	12.6	 16
689	 12	64.8	12.5	 16
690	 12	81.5	13.9	 16
691	 12	62.3	10.8	 16
692	 12	72.0	14.8	 16
693	 12	80.3	11.6	 16
694	 12	98.3	12.0	 16
695	 12	79.3	17.5	 16
696	 12	73.5	14.6	 16
697	 12	108.8	13.3	 16
698	 12	69.0	11.6	 16
699	 12	105.8	17.5	 16
700	 12	177.5	24.0	 16
701	 12	93.8	12.7	 16
702	 12	74.3	18.8	 16
703	 12	74.8	11.1	 16
704	 12	75.5	7.0	 16
705	 12	93.0	15.5	 16
706	 12	105.5	14.5	 16
707	 12	102.0	12.7	 16
708	 12	197.3	149.0	 16
709	 12	109.5	14.1	 16
710	 12	109.8	33.0	 16
711	 12	375.8	72.7	 16
  0	 13	124.0	18.2	 16
  1	 13	159.3	14.7	 16
  2	 13	83.3	10.9	 16
  3	 13	86.0	13.5	 16
  4	 13	153.3	22.9	 16
  5	 13	102.5	14.7	 16
  6	 13	69.5	16.1	 16
  7	 13	99.0	17.1	 16
  8	 13	120.5	20.2	 16
  9	 13	192.8	25.6	 16
 10	 13	99.3	22.4	 16
 11	 13	73.0	17.5	 16
 12	 13	86.3	32.3	 16
 13	 13	81.3	7.6	 16
 14	 13	87.3	15.7	 16
 15	 13	143.3	15.3	 16
 16	 13	230.0	24.7	 16
 17	 13	390.8	50.5	 16
 18	 13	100.3	26.8	 16
 19	 13	131.3	19.8	 16
 20	 13	134.3	17.9	 16
 21	 13	187.0	31.9	 16
 22	 13	76.5	10.1	 16
 23	 13	77.5	13.4	 16
 24	 13	72.5	11.9	 16
 25	 13	102.0	15.6	 16
 26	 13	80.5	17.3	 16
 27	 13	443.5	54.2	 16
 28	 13	135.5	19.0	 16
 29	 13	82.3	10.3	 16
 30	 13	76.3	14.6	 16
 31	 13	547.0	72.1	 16
 32	 13	86.5	13.9	 16
 33	 13	181.3	30.2	 16
 34	 13	651.0	104.4	 16
 35	 13	348.5	51.4	 16
 36	 13	106.8	11.8	 16
 37	 13	366.0	46.0	 16
 38	 13	114.3	15.7	 16
 39	 13	165.3	24.7	 16
 40	 13	117.3	31.5	 16
 41	 13	136.5	20.9	 16
 42	 13	107.5	19.8	 16
 43	 13	86.3	10.6	 16
 44	 13	77.8	12.1	 16
 45	 13	165.8	21.4	 16
 46	 13	426.3	36.4	 16
 47	 13	1953.5	260.3	 16
 48	 13	160.3	29.0	 16
 49	 13	95.3	16.1	 16
 50	 13	96.5	12.0	 16
 51	 13	850.3	130.5	 16
 52	 13	137.3	28.9	 16
 53	 13	77.5	12.1	 16
 54	 13	90.3	15.4	 16
 55	 13	80.5	11.8	 16
 56	 13	60.5	9.7	 16
 57	 13	84.3	11.7	 16
 58	 13	74.5	10.0	 16
 59	 13	82.0	14.7	 16
 60	 13	93.5	15.8	 16
 61	 13	98.3	12.1	 16
 62	 13	130.3	27.9	 16
 63	 13	136.3	15.4	 16
 64	 13	1129.0	123.4	 16
 65	 13	300.0	39.9	 16
 66	 13	106.0	20.1	 16
 67	 13	136.8	24.3	 16
 68	 13	205.3	29.5	 16
 69	 13	113.3	20.9	 16
 70	 13	68.0	11.4	 16
 71	 13	208.0	29.7	 16
 72	 13	70.3	15.5	 16
 73	 13	75.3	11.9	 16
 74	 13	202.3	30.5	 16
 75	 13	81.3	11.8	 16
 76	 13	99.0	18.6	 16
 77	 13	1154.5	137.1	 16
 78	 13	182.0	24.3	 16
 79	 13	70.5	8.9	 16
 80	 13	185.8	31.8	 16
 81	 13	94.5	17.8	 16
 82	 13	218.0	31.4	 16
 83	 13	112.0	22.1	 16
 84	 13	67.8	11.7	 16
 85	 13	76.0	15.4	 16
 86	 13	156.5	27.5	 16
 87	 13	86.5	15.4	 16
 88	 13	322.3	26.8	 16
 89	 13	550.3	32.9	 16
 90	 13	132.3	17.5	 16
 91	 13	325.8	30.3	 16
 92	 13	88.8	10.4	 16
 93	 13	85.0	14.0	 16
 94	 13	143.5	19.7	 16
 95	 13	85.8	11.2	 16
 96	 13	89.3	16.6	 16
 97	 13	69.5	14.0	 16
 98	 13	80.8	14.4	 16
 99	 13	105.3	15.7	 16
100	 13	98.0	15.6	 16
101	 13	461.3	61.7	 16
102	 13	82.8	14.2	 16
103	 13	103.5	17.1	 16
104	 13	79.5	11.9	 16
105	 13	76.3	11.3	 16
106	 13	274.3	47.1	 16
107	 13	75.3	13.3	 16
108	 13	96.8	23.9	 16
109	 13	80.5	13.0	 16
110	 13	98.8	17.3	 16
111	 13	186.5	27.7	 16
112	 13	279.3	37.2	 16
113	 13	114.3	16.3	 16
114	 13	76.5	14.2	 16
115	 13	123.8	19.7	 16
116	 13	110.5	20.3	 16
117	 13	113.0	14.4	 16
118	 13	101.3	25.2	 16
119	 13	104.3	28.2	 16
120	 13	294.3	29.8	 16
121	 13	177.0	21.0	 16
122	 13	77.5	13.4	 16
123	 13	109.5	14.6	 16
124	 13	150.5	30.9	 16
125	 13	91.0	10.5	 16
126	 13	1135.8	151.6	 16
127	 13	115.3	20.5	 16
128	 13	110.0	16.9	 16
129	 13	310.3	49.5	 16
130	 13	75.3	12.7	 16
131	 13	320.0	47.7	 16
132	 13	240.8	32.6	 16
133	 13	265.0	41.9	 16
134	 13	1151.0	188.2	 16
135	 13	94.5	14.8	 16
136	 13	98.3	16.8	 16
137	 13	167.0	36.0	 16
138	 13	176.8	24.6	 16
139	 13	131.5	23.3	 16
140	 13	98.0	17.1	 16
141	 13	80.5	12.1	 16
142	 13	424.3	73.4	 16
143	 13	88.0	17.6	 16
144	 13	200.8	24.7	 16
145	 13	245.5	29.1	 16
146	 13	998.3	201.9	 16
147	 13	81.0	12.4	 16
148	 13	350.3	43.7	 16
149	 13	134.0	23.0	 16
150	 13	133.0	21.1	 16
151	 13	68.3	9.6	 16
152	 13	130.8	28.0	 16
153	 13	3975.8	783.8	 16
154	 13	260.3	23.9	 16
155	 13	84.0	12.5	 16
156	 13	106.5	15.4	 16
157	 13	105.0	15.9	 16
158	 13	140.3	26.0	 16
159	 13	125.5	19.8	 16
160	 13	68.3	9.7	 16
161	 13	139.8	25.1	 16
162	 13	68.8	12.7	 16
163	 13	64.0	8.0	 12
164	 13	101.0	15.5	 20
165	 13	208.3	37.3	 16
166	 13	87.3	12.4	 16
167	 13	121.3	21.2	 16
168	 13	85.0	14.8	 16
169	 13	88.0	16.7	 16
170	 13	81.3	11.8	 16
171	 13	69.5	9.4	 16
172	 13	98.3	16.9	 16
173	 13	66.5	9.4	 16
174	 13	115.8	25.1	 16
175	 13	93.5	12.3	 16
176	 13	94.5	15.0	 16
177	 13	82.3	12.8	 16
178	 13	162.3	34.0	 16
179	 13	86.5	15.3	 16
180	 13	231.0	29.8	 16
181	 13	179.8	35.4	 16
182	 13	180.8	40.4	 16
183	 13	77.8	12.7	 16
184	 13	84.5	14.4	 16
185	 13	72.5	11.0	 16
186	 13	793.8	124.9	 16
187	 13	266.5	40.8	 16
188	 13	156.3	29.3	 16
189	 13	100.3	19.1	 16
190	 13	168.3	17.1	 16
191	 13	134.3	18.1	 16
192	 13	161.5	32.9	 16
193	 13	127.8	19.6	 16
194	 13	104.0	18.6	 16
195	 13	195.3	26.5	 16
196	 13	117.5	25.0	 16
197	 13	81.5	12.6	 16
198	 13	164.8	24.9	 16
199	 13	104.0	15.7	 16
200	 13	274.0	22.2	 16
201	 13	68.3	9.9	 16
202	 13	128.3	21.2	 16
203	 13	96.3	15.5	 16
204	 13	73.3	17.7	 16
205	 13	87.5	11.6	 16
206	 13	113.3	27.3	 16
207	 13	78.3	12.1	 16
208	 13	90.8	14.1	 16
209	 13	79.8	15.1	 16
210	 13	87.8	19.6	 16
211	 13	186.0	31.6	 16
212	 13	1055.0	188.9	 16
213	 13	104.5	19.1	 16
214	 13	72.3	12.8	 16
215	 13	97.3	17.3	 16
216	 13	76.8	16.2	 16
217	 13	69.5	9.2	 16
218	 13	80.0	15.8	 16
219	 13	73.3	17.0	 16
220	 13	141.5	21.8	 16
221	 13	146.5	26.1	 16
222	 13	151.3	24.9	 16
223	 13	236.5	26.0	 16
224	 13	87.3	13.1	 16
225	 13	86.0	15.2	 16
226	 13	89.3	11.9	 16
227	 13	109.3	22.1	 16
228	 13	115.3	14.0	 16
229	 13	80.3	12.1	 16
230	 13	81.0	12.8	 16
231	 13	252.3	24.0	 16
232	 13	282.5	30.5	 16
233	 13	235.0	37.4	 16
234	 13	78.0	11.1	 16
235	 13	583.0	69.3	 16
236	 13	241.8	28.7	 16
237	 13	1534.3	144.3	 16
238	 13	1648.8	250.7	 16
239	 13	434.8	42.4	 16
240	 13	238.0	22.3	 16
241	 13	2357.3	263.3	 16
242	 13	2732.8	244.3	 16
243	 13	216.3	33.0	 16
244	 13	180.8	31.2	 16
245	 13	65.8	10.6	 16
246	 13	139.3	21.2	 16
247	 13	141.5	19.4	 16
248	 13	104.3	12.3	 16
249	 13	93.8	13.2	 16
250	 13	82.3	13.9	 16
251	 13	81.8	13.5	 16
252	 13	64.5	10.6	 16
253	 13	84.5	14.9	 16
254	 13	72.5	9.8	 16
255	 13	80.0	13.1	 16
256	 13	517.3	57.7	 16
257	 13	83.3	11.5	 16
258	 13	107.8	23.0	 16
259	 13	80.0	13.2	 16
260	 13	73.3	12.9	 16
261	 13	150.8	19.4	 16
262	 13	99.8	15.0	 16
263	 13	323.0	59.5	 16
264	 13	90.0	10.8	 16
265	 13	110.5	17.8	 16
266	 13	201.8	37.1	 16
267	 13	196.5	26.2	 16
268	 13	77.3	8.3	 16
269	 13	302.8	40.8	 16
270	 13	176.3	28.8	 16
271	 13	99.0	15.5	 16
272	 13	122.5	20.7	 16
273	 13	87.5	18.7	 16
274	 13	85.3	16.1	 16
275	 13	77.0	13.5	 16
276	 13	1463.3	134.7	 16
277	 13	161.3	36.8	 16
278	 13	153.3	23.3	 16
279	 13	85.3	13.7	 16
280	 13	79.0	14.1	 16
281	 13	73.3	14.3	 16
282	 13	103.3	16.8	 16
283	 13	107.5	15.8	 16
284	 13	60.5	8.9	 16
285	 13	88.0	12.9	 16
286	 13	458.0	56.5	 16
287	 13	209.0	30.1	 16
288	 13	108.8	19.8	 16
289	 13	91.8	15.9	 16
290	 13	201.8	26.9	 16
291	 13	80.0	13.6	 16
292	 13	174.5	17.0	 16
293	 13	81.3	13.3	 16
294	 13	127.0	19.7	 16
295	 13	174.5	22.8	 16
296	 13	146.0	14.1	 16
297	 13	135.5	15.3	 16
298	 13	213.5	29.2	 16
299	 13	196.3	22.5	 16
300	 13	179.8	26.4	 16
301	 13	126.0	21.2	 16
302	 13	186.3	31.0	 16
303	 13	118.5	17.0	 16
304	 13	276.5	38.8	 16
305	 13	175.5	30.4	 16
306	 13	327.3	57.9	 16
307	 13	112.0	15.7	 16
308	 13	90.3	12.9	 16
309	 13	308.3	23.0	 16
310	 13	235.0	30.1	 16
311	 13	126.0	17.9	 16
312	 13	95.0	15.8	 16
313	 13	100.5	14.4	 16
314	 13	103.8	18.4	 16
315	 13	69.5	9.7	 16
316	 13	104.3	14.0	 16
317	 13	116.0	14.5	 16
318	 13	78.5	11.8	 16
319	 13	76.0	9.2	 16
320	 13	130.0	23.6	 16
321	 13	115.3	20.0	 16
322	 13	134.0	18.9	 16
323	 13	874.5	85.9	 16
324	 13	106.5	20.1	 16
325	 13	203.8	33.4	 16
326	 13	222.3	28.4	 16
327	 13	127.8	21.8	 16
328	 13	87.3	12.4	 16
329	 13	248.3	43.4	 16
330	 13	358.3	55.6	 16
331	 13	351.3	62.0	 16
332	 13	112.5	16.6	 16
333	 13	156.3	19.6	 16
334	 13	71.3	14.8	 16
335	 13	64.5	11.8	 16
336	 13	70.3	11.4	 16
337	 13	80.3	13.6	 16
338	 13	172.3	24.3	 16
339	 13	193.0	26.3	 16
340	 13	268.0	36.6	 16
341	 13	1906.3	349.9	 16
342	 13	119.3	21.4	 20
343	 13	80.5	14.9	 16
344	 13	70.3	11.8	 16
345	 13	91.3	11.5	 16
346	 13	236.3	34.3	 16
347	 13	77.0	11.9	 16
348	 13	160.0	22.2	 16
349	 13	836.8	140.2	 16
350	 13	1721.8	220.3	 16
351	 13	234.0	39.5	 16
352	 13	144.5	18.9	 16
353	 13	1090.0	147.5	 16
354	 13	286.8	29.5	 16
355	 13	251.5	25.1	 16
356	 13	209.8	30.1	 16
357	 13	147.5	13.0	 16
358	 13	100.8	19.2	 16
359	 13	76.5	12.5	 16
360	 13	84.5	14.7	 16
361	 13	287.5	28.6	 16
362	 13	145.8	17.0	 16
363	 13	86.3	17.5	 16
364	 13	85.5	10.7	 16
365	 13	76.0	13.6	 16
366	 13	76.8	13.8	 16
367	 13	323.8	28.9	 16
368	 13	74.5	10.3	 16
369	 13	89.3	17.9	 16
370	 13	213.8	14.1	 16
371	 13	325.3	28.7	 16
372	 13	213.5	25.4	 16
373	 13	113.8	19.9	 16
374	 13	70.0	12.9	 16
375	 13	156.0	20.9	 16
376	 13	128.8	19.7	 16
377	 13	210.3	22.3	 16
378	 13	98.5	11.3	 16
379	 13	229.5	31.8	 16
380	 13	234.8	40.5	 16
381	 13	66.8	8.1	 16
382	 13	75.0	10.8	 16
383	 13	127.0	16.8	 16
384	 13	332.0	34.6	 16
385	 13	82.5	11.6	 16
386	 13	88.0	12.8	 16
387	 13	85.0	14.2	 16
388	 13	95.3	12.1	 16
389	 13	83.5	14.8	 16
390	 13	132.0	18.8	 16
391	 13	136.3	17.4	 16
392	 13	69.0	14.6	 16
393	 13	67.5	10.2	 16
394	 13	235.8	36.1	 16
395	 13	89.0	13.8	 16
396	 13	185.0	18.7	 16
397	 13	194.3	16.2	 16
398	 13	110.3	15.5	 16
399	 13	110.0	22.6	 16
400	 13	393.0	30.2	 16
401	 13	259.3	29.3	 16
402	 13	115.3	19.0	 16
403	 13	90.3	11.1	 16
404	 13	105.8	19.2	 16
405	 13	78.0	15.5	 16
406	 13	163.3	22.1	 16
407	 13	156.8	23.6	 16
408	 13	92.0	12.5	 16
409	 13	90.3	13.4	 16
410	 13	257.3	57.5	 16
411	 13	116.8	11.1	 16
412	 13	94.5	16.5	 16
413	 13	355.0	36.3	 16
414	 13	354.0	60.6	 16
415	 13	185.5	20.5	 16
416	 13	135.3	17.0	 16
417	 13	143.3	24.0	 16
418	 13	143.3	18.5	 16
419	 13	151.5	24.4	 16
420	 13	90.3	10.7	 16
421	 13	96.0	27.1	 16
422	 13	158.0	32.9	 16
423	 13	88.8	14.5	 16
424	 13	130.8	20.9	 16
425	 13	131.5	23.4	 16
426	 13	100.0	14.0	 16
427	 13	599.5	64.6	 16
428	 13	134.0	45.4	 16
429	 13	189.3	35.4	 16
430	 13	113.0	16.8	 16
431	 13	202.5	27.2	 16
432	 13	404.0	47.1	 16
433	 13	1019.0	148.3	 16
434	 13	1075.3	96.0	 16
435	 13	146.8	23.7	 16
436	 13	85.3	8.8	 16
437	 13	206.0	39.9	 16
438	 13	157.3	27.8	 16
439	 13	2094.0	446.9	 16
440	 13	98.8	16.1	 16
441	 13	165.5	33.9	 16
442	 13	147.0	27.0	 16
443	 13	89.0	11.6	 16
444	 13	123.8	18.1	 16
445	 13	74.5	13.4	 16
446	 13	106.5	13.1	 16
447	 13	90.3	15.6	 16
448	 13	91.0	15.2	 16
449	 13	71.3	12.5	 16
450	 13	71.8	12.7	 16
451	 13	69.0	10.5	 16
452	 13	69.3	10.6	 16
453	 13	107.5	15.7	 16
454	 13	99.8	15.2	 16
455	 13	181.8	31.3	 16
456	 13	70.0	13.1	 16
457	 13	145.8	29.4	 16
458	 13	99.8	16.5	 16
459	 13	105.0	19.1	 16
460	 13	88.3	14.4	 16
461	 13	156.8	25.3	 16
462	 13	927.5	136.2	 16
463	 13	137.3	23.9	 16
464	 13	87.0	18.8	 16
465	 13	183.3	27.6	 16
466	 13	229.0	22.2	 16
467	 13	178.3	25.0	 16
468	 13	71.3	10.3	 16
469	 13	142.0	16.6	 16
470	 13	114.0	19.6	 16
471	 13	187.0	32.8	 16
472	 13	87.0	16.3	 16
473	 13	317.8	42.6	 16
474	 13	181.0	25.8	 16
475	 13	78.5	12.7	 16
476	 13	103.5	16.4	 16
477	 13	114.0	17.4	 16
478	 13	74.0	10.2	 16
479	 13	169.3	142.2	 16
480	 13	13095.0	2090.8	 16
481	 13	342.8	56.6	 16
482	 13	202.8	33.8	 16
483	 13	85.0	32.4	 16
484	 13	77.5	15.7	 16
485	 13	237.0	33.0	 16
486	 13	404.3	238.3	 16
487	 13	301.5	46.0	 16
488	 13	138.3	18.8	 16
489	 13	93.3	15.6	 16
490	 13	89.0	12.9	 16
491	 13	71.8	12.1	 16
492	 13	72.0	8.2	 16
493	 13	81.8	16.8	 16
494	 13	84.0	10.4	 16
495	 13	115.3	18.5	 16
496	 13	90.5	13.3	 16
497	 13	171.5	36.7	 16
498	 13	88.0	14.3	 16
499	 13	180.0	28.0	 16
500	 13	154.8	19.3	 16
501	 13	101.8	22.1	 16
502	 13	95.3	13.5	 16
503	 13	81.8	14.3	 16
504	 13	120.3	19.2	 16
505	 13	62.3	10.1	 16
506	 13	201.8	30.7	 16
507	 13	145.0	29.3	 16
508	 13	835.0	134.6	 16
509	 13	292.8	31.2	 16
510	 13	95.8	15.4	 16
511	 13	132.8	16.4	 16
512	 13	107.5	13.1	 16
513	 13	138.8	21.2	 16
514	 13	244.0	38.3	 16
515	 13	292.5	31.8	 16
516	 13	178.3	20.6	 16
517	 13	123.0	16.3	 16
518	 13	100.5	12.3	 16
519	 13	116.8	19.6	 16
520	 13	93.5	15.1	 20
521	 13	92.3	14.5	 16
522	 13	142.5	12.3	 16
523	 13	157.3	19.4	 16
524	 13	169.0	21.9	 16
525	 13	70.8	11.9	 16
526	 13	103.0	18.2	 16
527	 13	166.0	15.8	 16
528	 13	229.8	26.9	 16
529	 13	199.0	26.4	 16
530	 13	123.3	15.5	 16
531	 13	91.5	12.5	 16
532	 13	137.5	20.3	 16
533	 13	89.3	14.5	 16
534	 13	90.3	12.4	 16
535	 13	349.3	36.0	 16
536	 13	78.3	12.0	 16
537	 13	108.3	16.4	 16
538	 13	147.0	21.2	 16
539	 13	122.8	20.9	 16
540	 13	125.0	16.9	 16
541	 13	183.3	26.4	 16
542	 13	69.0	12.3	 16
543	 13	98.3	20.8	 16
544	 13	68.5	10.9	 16
545	 13	147.5	29.4	 16
546	 13	324.3	52.2	 16
547	 13	659.5	78.7	 16
548	 13	469.0	52.1	 16
549	 13	188.5	24.1	 16
550	 13	87.5	12.0	 16
551	 13	110.3	15.5	 16
552	 13	83.8	15.1	 16
553	 13	2418.5	402.9	 16
554	 13	66.0	9.3	 16
555	 13	74.8	11.8	 16
556	 13	378.5	56.6	 16
557	 13	77.3	15.0	 16
558	 13	91.8	18.0	 16
559	 13	111.3	14.5	 16
560	 13	111.3	14.0	 16
561	 13	101.3	14.8	 16
562	 13	170.8	34.4	 16
563	 13	823.5	123.2	 16
564	 13	117.3	19.7	 16
565	 13	125.8	44.8	 16
566	 13	207.5	32.9	 16
567	 13	288.0	23.9	 16
568	 13	146.5	17.1	 16
569	 13	150.0	22.0	 16
570	 13	92.0	11.5	 16
571	 13	66.0	13.0	 16
572	 13	109.3	20.6	 16
573	 13	147.3	30.4	 16
574	 13	99.3	13.1	 16
575	 13	128.5	18.9	 16
576	 13	139.8	20.6	 16
577	 13	111.5	14.2	 16
578	 13	239.5	33.7	 16
579	 13	450.3	88.8	 16
580	 13	158.3	22.4	 16
581	 13	128.8	22.9	 16
582	 13	102.8	16.4	 16
583	 13	93.5	14.4	 16
584	 13	310.8	64.0	 16
585	 13	113.5	16.3	 16
586	 13	103.5	12.7	 16
587	 13	205.0	25.1	 16
588	 13	66.8	14.0	 16
589	 13	102.0	16.9	 16
590	 13	94.3	19.0	 16
591	 13	228.3	24.7	 16
592	 13	534.0	83.3	 16
593	 13	122.5	18.3	 16
594	 13	190.5	26.1	 16
595	 13	316.0	50.9	 16
596	 13	85.0	16.3	 16
597	 13	984.0	202.2	 16
598	 13	192.8	31.1	 16
599	 13	98.0	13.5	 16
600	 13	119.3	16.6	 16
601	 13	105.0	10.2	 16
602	 13	174.3	22.0	 16
603	 13	87.0	16.9	 16
604	 13	87.8	15.3	 16
605	 13	179.3	28.1	 16
606	 13	169.8	21.1	 16
607	 13	85.3	11.5	 16
608	 13	91.0	8.1	 16
609	 13	98.3	11.9	 16
610	 13	68.8	10.6	 16
611	 13	63.0	12.3	 16
612	 13	97.8	14.6	 16
613	 13	99.8	16.9	 16
614	 13	145.0	21.0	 16
615	 13	205.3	28.2	 16
616	 13	255.5	26.2	 16
617	 13	129.3	27.3	 16
618	 13	81.8	11.4	 16
619	 13	182.5	24.4	 16
620	 13	68.0	10.6	 16
621	 13	66.3	9.1	 16
622	 13	102.8	14.1	 16
623	 13	154.0	24.9	 16
624	 13	119.3	14.0	 16
625	 13	88.8	14.4	 16
626	 13	81.3	12.8	 16
627	 13	82.5	14.0	 16
628	 13	82.8	10.7	 16
629	 13	77.3	11.9	 16
630	 13	849.5	149.8	 16
631	 13	955.0	166.6	 16
632	 13	104.8	15.7	 16
633	 13	189.3	20.3	 16
634	 13	465.5	35.9	 16
635	 13	254.5	36.8	 16
636	 13	425.5	113.8	 16
637	 13	67.8	11.3	 16
638	 13	231.0	36.0	 16
639	 13	106.3	14.0	 16
640	 13	111.0	18.7	 16
641	 13	156.0	24.8	 16
642	 13	119.8	14.5	 16
643	 13	96.5	12.5	 16
644	 13	92.5	9.8	 16
645	 13	136.8	21.9	 16
646	 13	84.0	11.2	 16
647	 13	174.3	32.0	 16
648	 13	84.0	14.6	 16
649	 13	73.3	13.0	 16
650	 13	85.3	13.7	 16
651	 13	80.0	10.7	 16
652	 13	176.8	24.3	 16
653	 13	76.0	13.6	 16
654	 13	71.0	11.1	 16
655	 13	70.3	11.7	 16
656	 13	76.5	13.9	 16
657	 13	71.3	12.4	 16
658	 13	369.0	79.3	 16
659	 13	387.3	74.8	 16
660	 13	663.8	131.9	 16
661	 13	215.0	35.7	 16
662	 13	135.3	17.8	 16
663	 13	277.5	32.6	 16
664	 13	673.5	166.0	 16
665	 13	129.0	25.3	 16
666	 13	797.5	142.1	 16
667	 13	61.5	11.5	 16
668	 13	362.3	89.7	 16
669	 13	68.5	12.4	 16
670	 13	81.3	17.9	 16
671	 13	75.5	16.3	 16
672	 13	87.5	17.7	 16
673	 13	87.3	10.2	 16
674	 13	65.3	12.0	 16
675	 13	65.3	10.0	 16
676	 13	99.3	14.6	 16
677	 13	166.0	55.8	 16
678	 13	77.3	13.2	 16
679	 13	92.3	16.8	 16
680	 13	283.3	56.6	 16
681	 13	79.3	16.2	 16
682	 13	130.0	22.2	 16
683	 13	114.0	21.5	 16
684	 13	171.3	29.9	 16
685	 13	141.5	28.5	 16
686	 13	81.0	12.4	 16
687	 13	64.8	11.4	 16
688	 13	87.0	14.8	 16
689	 13	538.5	113.1	 16
690	 13	112.0	19.4	 16
691	 13	189.0	30.3	 16
692	 13	214.3	31.0	 16
693	 13	284.8	30.3	 16
694	 13	79.8	20.4	 16
695	 13	109.5	22.0	 16
696	 13	137.0	27.8	 16
697	 13	77.8	10.8	 16
698	 13	1302.5	337.2	 20
699	 13	170.5	25.9	 16
700	 13	128.5	19.3	 16
701	 13	157.3	22.6	 16
702	 13	722.0	47.9	 16
703	 13	158.0	21.3	 16
704	 13	112.5	16.3	 16
705	 13	98.3	19.1	 16
706	 13	110.3	20.0	 16
707	 13	486.5	64.2	 16
708	 13	144.0	19.8	 16
709	 13	84.0	14.5	 16
710	 13	380.3	32.2	 16
711	 13	159.0	26.2	 16
  0	 14	8361.0	1630.6	 16
  1	 14	214.0	22.4	 16
  2	 14	92.5	14.6	 16
  3	 14	76.3	12.9	 16
  4	 14	105.8	12.3	 20
  5	 14	84.8	11.2	 16
  6	 14	70.3	11.8	 16
  7	 14	72.5	11.5	 16
  8	 14	266.0	26.3	 16
  9	 14	118.0	22.3	 16
 10	 14	74.8	13.9	 16
 11	 14	68.5	6.7	 16
 12	 14	72.8	11.6	 16
 13	 14	79.8	13.2	 16
 14	 14	82.0	12.7	 16
 15	 14	219.8	28.7	 16
 16	 14	212.0	31.1	 16
 17	 14	104.5	12.8	 16
 18	 14	83.0	20.8	 16
 19	 14	67.3	7.9	 16
 20	 14	89.5	16.6	 16
 21	 14	94.5	18.5	 16
 22	 14	68.5	9.3	 16
 23	 14	56.3	9.6	 16
 24	 14	70.3	12.0	 16
 25	 14	71.5	8.9	 16
 26	 14	71.0	14.1	 16
 27	 14	95.0	19.4	 16
 28	 14	71.3	10.0	 16
 29	 14	91.0	15.7	 16
 30	 14	61.3	10.4	 16
 31	 14	105.3	19.8	 16
 32	 14	83.5	21.6	 16
 33	 14	82.8	14.7	 16
 34	 14	84.5	10.3	 16
 35	 14	81.0	11.0	 16
 36	 14	111.5	18.7	 16
 37	 14	113.5	17.3	 16
 38	 14	91.3	11.9	 16
 39	 14	110.0	16.8	 16
 40	 14	84.3	15.8	 16
 41	 14	180.5	27.7	 16
 42	 14	70.8	14.7	 16
 43	 14	89.3	14.1	 16
 44	 14	79.8	11.7	 16
 45	 14	195.3	21.0	 16
 46	 14	167.3	22.6	 16
 47	 14	757.3	151.2	 16
 48	 14	181.0	22.6	 16
 49	 14	85.3	16.2	 16
 50	 14	84.3	13.0	 16
 51	 14	265.0	36.9	 16
 52	 14	89.0	13.4	 16
 53	 14	64.3	10.7	 16
 54	 14	75.3	16.2	 16
 55	 14	72.5	14.1	 16
 56	 14	70.0	15.9	 16
 57	 14	72.0	12.3	 16
 58	 14	73.8	14.9	 16
 59	 14	81.0	15.6	 16
 60	 14	92.8	21.2	 16
 61	 14	81.5	13.5	 16
 62	 14	163.8	25.4	 16
 63	 14	134.3	14.2	 16
 64	 14	173.5	32.2	 16
 65	 14	72.3	11.1	 16
 66	 14	90.0	17.8	 16
 67	 14	108.3	14.3	 16
 68	 14	90.0	14.3	 16
 69	 14	63.8	9.5	 16
 70	 14	74.5	12.4	 16
 71	 14	82.8	12.4	 16
 72	 14	65.8	14.8	 16
 73	 14	63.8	14.0	 16
 74	 14	73.0	9.3	 16
 75	 14	72.3	11.7	 16
 76	 14	89.8	12.5	 16
 77	 14	200.3	24.9	 16
 78	 14	75.0	11.4	 16
 79	 14	82.0	11.3	 16
 80	 14	126.3	28.2	 16
 81	 14	93.3	20.5	 16
 82	 14	103.0	23.0	 16
 83	 14	71.0	14.5	 16
 84	 14	67.5	10.8	 16
 85	 14	78.0	15.9	 16
 86	 14	118.0	19.0	 16
 87	 14	82.0	9.9	 16
 88	 14	238.5	21.4	 16
 89	 14	430.8	41.8	 16
 90	 14	103.3	16.6	 16
 91	 14	196.8	17.8	 16
 92	 14	73.0	5.9	 16
 93	 14	94.0	15.4	 16
 94	 14	191.3	18.8	 16
 95	 14	92.0	15.6	 16
 96	 14	68.0	11.3	 12
 97	 14	63.3	9.6	 16
 98	 14	82.8	15.9	 16
 99	 14	86.3	12.6	 16
100	 14	78.3	12.1	 16
101	 14	153.0	25.3	 16
102	 14	86.0	15.9	 16
103	 14	96.8	17.6	 16
104	 14	81.3	8.3	 16
105	 14	67.0	11.5	 16
106	 14	110.0	15.1	 16
107	 14	74.5	9.7	 16
108	 14	77.3	11.8	 16
109	 14	76.0	11.4	 16
110	 14	91.3	15.3	 16
111	 14	82.0	9.8	 16
112	 14	154.0	44.5	 16
113	 14	98.3	13.6	 16
114	 14	92.0	14.3	 16
115	 14	89.8	18.0	 16
116	 14	98.3	12.9	 16
117	 14	82.3	13.2	 16
118	 14	79.0	13.4	 16
119	 14	133.0	20.8	 16
120	 14	120.8	19.2	 16
121	 14	104.0	16.0	 16
122	 14	73.3	14.2	 16
123	 14	100.0	13.9	 16
124	 14	112.5	19.9	 16
125	 14	134.0	21.2	 16
126	 14	172.3	26.0	 16
127	 14	104.5	12.2	 16
128	 14	89.3	12.5	 16
129	 14	168.5	23.4	 16
130	 14	83.3	16.5	 16
131	 14	111.8	65.1	 16
132	 14	84.0	13.7	 16
133	 14	100.3	16.6	 16
134	 14	197.5	27.4	 16
135	 14	99.3	22.2	 16
136	 14	97.8	15.0	 16
137	 14	74.5	13.3	 16
138	 14	444.8	59.3	 16
139	 14	116.3	19.6	 16
140	 14	86.0	15.3	 16
141	 14	73.5	13.0	 16
142	 14	78.3	17.7	 16
143	 14	79.3	12.3	 16
144	 14	97.0	17.6	 16
145	 14	149.3	17.3	 16
146	 14	396.3	65.9	 16
147	 14	69.3	11.9	 16
148	 14	152.8	22.5	 16
149	 14	116.5	17.6	 16
150	 14	136.3	19.0	 16
151	 14	82.0	19.0	 16
152	 14	68.3	9.5	 16
153	 14	1048.0	204.8	 16
154	 14	100.3	18.3	 16
155	 14	75.0	15.6	 16
156	 14	98.0	15.7	 16
157	 14	105.3	12.7	 16
158	 14	203.8	23.6	 16
159	 14	116.3	14.1	 16
160	 14	75.0	11.9	 16
161	 14	84.0	9.0	 16
162	 14	87.8	17.4	 16
163	 14	83.8	13.8	 16
164	 14	111.3	21.5	 16
165	 14	88.3	22.7	 16
166	 14	92.8	19.6	 16
167	 14	92.0	11.4	 16
168	 14	85.3	11.1	 16
169	 14	71.8	13.7	 16
170	 14	77.8	12.4	 16
171	 14	74.3	16.5	 16
172	 14	76.3	18.1	 16
173	 14	71.8	12.1	 16
174	 14	82.0	14.3	 16
175	 14	87.3	10.8	 16
176	 14	83.5	16.4	 16
177	 14	97.8	11.5	 16
178	 14	88.3	15.9	 16
179	 14	72.3	14.3	 16
180	 14	149.8	31.5	 16
181	 14	131.8	16.3	 16
182	 14	265.3	46.4	 20
183	 14	66.3	10.2	 16
184	 14	99.5	15.3	 16
185	 14	78.5	9.4	 16
186	 14	169.8	23.8	 16
187	 14	98.0	16.1	 16
188	 14	107.0	20.3	 16
189	 14	151.0	31.0	 16
190	 14	84.3	11.1	 16
191	 14	114.0	19.5	 16
192	 14	75.8	16.1	 16
193	 14	92.8	17.1	 16
194	 14	114.5	17.6	 16
195	 14	103.0	19.0	 16
196	 14	169.5	26.6	 16
197	 14	69.3	11.0	 16
198	 14	100.8	14.3	 16
199	 14	94.0	16.2	 16
200	 14	116.0	12.3	 16
201	 14	91.5	44.7	 16
202	 14	98.0	24.6	 16
203	 14	86.5	15.1	 16
204	 14	66.3	12.4	 16
205	 14	72.5	9.5	 16
206	 14	74.3	10.8	 16
207	 14	59.3	9.1	 16
208	 14	70.0	15.1	 16
209	 14	77.3	14.4	 16
210	 14	102.3	15.4	 16
211	 14	78.5	12.9	 16
212	 14	329.5	55.2	 16
213	 14	79.3	11.5	 16
214	 14	70.3	12.3	 16
215	 14	73.8	11.9	 16
216	 14	83.8	11.6	 16
217	 14	68.3	11.9	 16
218	 14	80.3	15.8	 16
219	 14	72.3	9.8	 16
220	 14	119.5	18.0	 16
221	 14	110.3	12.9	 16
222	 14	93.8	17.0	 16
223	 14	237.3	35.0	 16
224	 14	90.3	15.6	 16
225	 14	86.0	13.3	 16
226	 14	90.0	18.1	 16
227	 14	85.3	9.3	 16
228	 14	112.0	15.0	 16
229	 14	108.8	19.7	 16
230	 14	70.5	13.3	 16
231	 14	166.3	17.0	 16
232	 14	178.0	21.8	 16
233	 14	287.0	35.7	 16
234	 14	148.3	20.7	 16
235	 14	379.8	42.2	 16
236	 14	193.0	23.6	 16
237	 14	3061.3	157.2	 16
238	 14	3354.0	253.8	 16
239	 14	468.3	51.5	 16
240	 14	141.5	28.7	 16
241	 14	460.0	81.9	 16
242	 14	566.8	90.8	 16
243	 14	107.3	9.3	 16
244	 14	83.5	12.2	 16
245	 14	73.3	16.3	 16
246	 14	97.5	13.6	 16
247	 14	82.3	18.1	 16
248	 14	72.5	34.8	 16
249	 14	78.5	17.4	 16
250	 14	72.5	12.9	 16
251	 14	76.5	13.6	 16
252	 14	68.3	10.4	 16
253	 14	72.0	11.3	 16
254	 14	73.3	11.0	 16
255	 14	83.0	18.9	 16
256	 14	129.3	22.0	 16
257	 14	87.3	15.0	 16
258	 14	108.8	21.6	 16
259	 14	64.3	9.3	 16
260	 14	70.0	11.7	 16
261	 14	75.0	9.7	 16
262	 14	84.8	12.9	 16
263	 14	169.5	21.6	 16
264	 14	86.3	13.1	 16
265	 14	104.8	15.6	 16
266	 14	69.5	14.3	 16
267	 14	298.0	25.7	 16
268	 14	89.5	14.8	 16
269	 14	209.0	18.2	 16
270	 14	88.8	14.0	 16
271	 14	84.0	9.8	 16
272	 14	133.3	30.0	 16
273	 14	109.5	51.9	 16
274	 14	71.3	12.3	 16
275	 14	75.8	12.0	 16
276	 14	114.5	15.9	 16
277	 14	81.0	10.0	 16
278	 14	85.0	15.1	 16
279	 14	70.3	11.8	 16
280	 14	83.0	13.6	 16
281	 14	62.0	9.2	 16
282	 14	132.0	25.9	 16
283	 14	128.3	16.2	 16
284	 14	62.3	8.0	 16
285	 14	80.5	11.8	 16
286	 14	205.8	26.5	 16
287	 14	83.0	14.3	 16
288	 14	84.8	13.9	 16
289	 14	92.3	11.9	 16
290	 14	70.3	10.9	 16
291	 14	70.3	10.3	 16
292	 14	89.3	15.4	 16
293	 14	70.0	12.0	 16
294	 14	88.0	13.8	 16
295	 14	124.0	22.2	 16
296	 14	153.3	16.3	 16
297	 14	82.8	34.0	 16
298	 14	86.8	12.0	 16
299	 14	142.5	25.9	 16
300	 14	99.5	18.3	 16
301	 14	131.8	18.6	 16
302	 14	85.0	13.6	 16
303	 14	90.8	25.2	 16
304	 14	122.8	14.2	 16
305	 14	89.8	16.8	 16
306	 14	98.8	18.1	 16
307	 14	108.3	16.0	 16
308	 14	82.8	16.4	 16
309	 14	160.8	17.9	 16
310	 14	147.0	36.7	 16
311	 14	128.8	20.5	 16
312	 14	81.8	12.4	 16
313	 14	83.3	13.2	 16
314	 14	87.0	12.1	 16
315	 14	72.5	16.5	 16
316	 14	102.3	14.9	 16
317	 14	93.0	17.8	 16
318	 14	75.3	11.7	 16
319	 14	91.5	19.5	 16
320	 14	90.3	14.4	 16
321	 14	101.8	17.7	 16
322	 14	110.3	20.5	 16
323	 14	208.8	27.2	 16
324	 14	105.3	27.5	 16
325	 14	444.3	32.0	 16
326	 14	108.3	16.6	 16
327	 14	103.5	19.5	 16
328	 14	96.0	12.9	 16
329	 14	83.5	10.0	 16
330	 14	94.3	17.1	 16
331	 14	151.3	30.4	 16
332	 14	87.3	12.2	 16
333	 14	92.5	14.4	 16
334	 14	79.3	9.7	 16
335	 14	67.0	12.8	 16
336	 14	64.5	8.0	 16
337	 14	80.0	14.7	 16
338	 14	97.0	11.4	 16
339	 14	337.0	47.4	 16
340	 14	197.0	24.8	 16
341	 14	145.8	21.5	 16
342	 14	79.3	11.6	 16
343	 14	73.5	9.1	 16
344	 14	64.5	9.2	 16
345	 14	141.0	151.5	 16
346	 14	88.0	11.2	 16
347	 14	68.3	18.8	 16
348	 14	93.0	16.2	 16
349	 14	111.5	19.1	 16
350	 14	236.3	39.3	 16
351	 14	138.0	27.1	 16
352	 14	77.0	8.7	 16
353	 14	160.5	23.1	 16
354	 14	81.0	13.0	 16
355	 14	129.8	19.7	 16
356	 14	266.3	32.3	 16
357	 14	271.5	33.3	 16
358	 14	124.8	16.6	 16
359	 14	79.5	18.5	 16
360	 14	75.8	12.7	 20
361	 14	158.5	18.7	 16
362	 14	89.3	10.8	 16
363	 14	85.0	23.8	 16
364	 14	80.0	12.0	 16
365	 14	76.8	12.9	 16
366	 14	86.3	13.8	 16
367	 14	127.8	17.2	 16
368	 14	88.0	16.2	 16
369	 14	82.0	20.9	 16
370	 14	167.5	16.1	 16
371	 14	154.0	20.4	 16
372	 14	256.3	30.3	 16
373	 14	136.3	22.1	 16
374	 14	78.3	13.4	 16
375	 14	108.5	15.1	 16
376	 14	86.5	12.5	 16
377	 14	280.5	36.1	 16
378	 14	92.0	11.0	 16
379	 14	133.5	23.1	 16
380	 14	135.5	20.8	 16
381	 14	75.0	11.1	 16
382	 14	102.5	16.8	 16
383	 14	111.3	18.6	 16
384	 14	138.8	27.8	 16
385	 14	72.0	8.1	 16
386	 14	83.0	14.4	 16
387	 14	82.3	7.9	 16
388	 14	94.5	17.1	 16
389	 14	95.8	25.2	 16
390	 14	80.3	12.1	 16
391	 14	71.0	10.4	 16
392	 14	72.3	12.0	 16
393	 14	71.0	10.7	 16
394	 14	216.0	22.7	 16
395	 14	84.3	13.0	 16
396	 14	134.8	22.8	 16
397	 14	258.5	33.2	 16
398	 14	104.3	20.1	 16
399	 14	87.0	12.7	 16
400	 14	94.8	17.2	 16
401	 14	96.0	8.9	 16
402	 14	85.0	17.8	 16
403	 14	86.3	16.1	 16
404	 14	80.3	13.6	 16
405	 14	73.3	12.4	 16
406	 14	209.3	28.5	 16
407	 14	202.8	26.5	 16
408	 14	82.5	13.6	 16
409	 14	82.0	13.7	 16
410	 14	84.8	17.4	 16
411	 14	83.3	11.3	 16
412	 14	90.0	13.1	 16
413	 14	117.5	17.8	 16
414	 14	93.3	14.5	 16
415	 14	125.5	19.7	 16
416	 14	67.3	8.0	 16
417	 14	77.0	11.7	 16
418	 14	133.3	16.8	 16
419	 14	93.0	18.2	 16
420	 14	86.5	14.5	 16
421	 14	75.5	13.7	 16
422	 14	94.0	15.8	 16
423	 14	85.5	19.7	 16
424	 14	116.3	14.6	 16
425	 14	112.0	16.7	 16
426	 14	96.3	15.3	 16
427	 14	136.8	19.3	 16
428	 14	117.3	14.1	 16
429	 14	131.5	16.6	 16
430	 14	81.3	14.4	 16
431	 14	134.5	16.1	 16
432	 14	117.0	15.1	 16
433	 14	181.8	29.1	 16
434	 14	211.3	26.3	 16
435	 14	87.8	12.7	 16
436	 14	74.3	11.9	 16
437	 14	90.3	10.6	 16
438	 14	210.3	28.7	 16
439	 14	184.8	106.1	 16
440	 14	74.3	16.8	 16
441	 14	85.8	13.6	 16
442	 14	103.3	15.0	 16
443	 14	78.5	15.1	 16
444	 14	84.5	12.2	 16
445	 14	78.3	11.4	 16
446	 14	80.3	14.7	 16
447	 14	75.5	12.4	 16
448	 14	80.8	16.3	 16
449	 14	72.8	15.9	 16
450	 14	65.8	10.6	 16
451	 14	70.8	11.2	 16
452	 14	71.3	14.5	 16
453	 14	69.0	12.0	 16
454	 14	81.5	12.4	 16
455	 14	91.0	12.9	 16
456	 14	73.3	14.0	 16
457	 14	75.5	14.5	 16
458	 14	102.0	12.4	 16
459	 14	80.8	7.9	 16
460	 14	97.8	16.4	 16
461	 14	95.3	17.4	 16
462	 14	183.3	38.6	 16
463	 14	84.5	15.3	 16
464	 14	72.5	12.4	 16
465	 14	91.3	11.5	 16
466	 14	83.5	13.9	 16
467	 14	92.0	18.5	 16
468	 14	73.3	12.7	 16
469	 14	67.5	12.9	 16
470	 14	137.3	27.3	 16
471	 14	104.5	16.3	 16
472	 14	72.5	9.4	 16
473	 14	95.3	18.4	 16
474	 14	114.8	15.4	 16
475	 14	87.3	14.5	 16
476	 14	74.0	11.1	 16
477	 14	86.3	18.5	 16
478	 14	72.5	11.9	 16
479	 14	71.3	9.8	 16
480	 14	5803.0	784.0	 16
481	 14	124.5	17.8	 16
482	 14	70.5	13.7	 16
483	 14	67.0	10.2	 16
484	 14	72.5	12.2	 16
485	 14	94.5	13.9	 16
486	 14	125.0	23.1	 16
487	 14	121.3	12.7	 16
488	 14	94.0	14.1	 16
489	 14	91.0	13.8	 16
490	 14	77.3	10.3	 16
491	 14	81.3	16.2	 16
492	 14	70.3	11.9	 16
493	 14	75.8	13.1	 16
494	 14	72.3	13.3	 16
495	 14	121.3	19.4	 16
496	 14	88.5	11.1	 16
497	 14	77.3	12.8	 16
498	 14	67.5	12.2	 16
499	 14	176.8	23.5	 16
500	 14	78.8	11.9	 16
501	 14	57.3	8.9	 16
502	 14	71.3	13.6	 16
503	 14	71.8	16.9	 16
504	 14	76.3	14.8	 16
505	 14	78.3	15.5	 16
506	 14	134.8	21.8	 16
507	 14	88.3	13.2	 16
508	 14	145.3	19.6	 16
509	 14	97.3	10.8	 16
510	 14	105.3	21.4	 16
511	 14	112.3	13.2	 16
512	 14	97.3	18.4	 16
513	 14	90.8	11.0	 16
514	 14	159.0	25.0	 16
515	 14	127.0	18.8	 16
516	 14	150.5	16.8	 16
517	 14	81.5	16.3	 16
518	 14	86.3	13.0	 16
519	 14	96.5	18.4	 16
520	 14	81.8	13.2	 16
521	 14	91.3	13.1	 16
522	 14	177.3	32.3	 16
523	 14	158.5	21.4	 16
524	 14	124.3	20.8	 16
525	 14	71.0	9.9	 16
526	 14	80.3	17.1	 16
527	 14	79.3	8.7	 16
528	 14	149.5	27.3	 16
529	 14	130.8	26.0	 16
530	 14	72.5	12.1	 16
531	 14	79.0	17.0	 16
532	 14	82.5	12.2	 16
533	 14	78.0	11.8	 16
534	 14	84.0	14.6	 16
535	 14	91.3	16.2	 16
536	 14	88.0	13.0	 16
537	 14	121.0	18.2	 16
538	 14	145.0	18.2	 20
539	 14	121.8	16.9	 16
540	 14	80.5	10.2	 16
541	 14	156.0	32.2	 16
542	 14	69.3	9.1	 16
543	 14	87.3	14.7	 16
544	 14	84.5	12.7	 16
545	 14	68.8	12.2	 16
546	 14	82.0	19.2	 16
547	 14	335.0	41.7	 16
548	 14	352.3	40.7	 16
549	 14	241.3	31.2	 16
550	 14	82.8	14.4	 16
551	 14	133.0	25.3	 16
552	 14	99.0	16.3	 16
553	 14	425.0	61.8	 16
554	 14	75.3	12.3	 16
555	 14	64.8	11.7	 16
556	 14	100.8	10.9	 16
557	 14	86.5	15.6	 16
558	 14	78.0	17.1	 16
559	 14	162.5	19.1	 16
560	 14	116.0	36.4	 16
561	 14	74.5	12.5	 16
562	 14	76.0	12.2	 16
563	 14	138.0	20.7	 16
564	 14	157.5	19.9	 16
565	 14	90.8	17.3	 16
566	 14	93.0	13.0	 16
567	 14	352.8	35.4	 16
568	 14	100.3	17.3	 16
569	 14	90.8	12.8	 16
570	 14	64.5	11.2	 16
571	 14	65.3	9.0	 16
572	 14	76.0	11.9	 16
573	 14	84.3	14.6	 16
574	 14	98.8	14.1	 16
575	 14	130.8	17.9	 16
576	 14	99.3	20.4	 16
577	 14	79.3	14.0	 16
578	 14	291.0	46.4	 16
579	 14	283.3	37.2	 16
580	 14	98.3	14.2	 16
581	 14	76.3	9.6	 16
582	 14	144.3	24.0	 16
583	 14	80.0	12.7	 16
584	 14	143.0	23.7	 16
585	 14	106.3	15.6	 16
586	 14	101.5	14.6	 16
587	 14	115.0	16.6	 16
588	 14	67.0	8.7	 16
589	 14	69.8	9.8	 16
590	 14	77.5	13.1	 16
591	 14	105.0	27.7	 16
592	 14	163.3	27.5	 16
593	 14	91.3	15.1	 16
594	 14	124.3	14.5	 16
595	 14	108.3	16.4	 16
596	 14	75.0	7.9	 16
597	 14	176.8	25.6	 16
598	 14	78.8	12.1	 16
599	 14	90.3	13.1	 16
600	 14	111.0	16.5	 16
601	 14	140.0	19.1	 16
602	 14	167.3	26.2	 16
603	 14	68.3	15.2	 16
604	 14	114.3	16.4	 16
605	 14	87.8	18.1	 16
606	 14	81.8	15.2	 16
607	 14	73.5	9.4	 16
608	 14	81.5	22.5	 16
609	 14	69.0	12.1	 16
610	 14	69.5	10.6	 16
611	 14	72.0	11.7	 16
612	 14	75.5	10.5	 16
613	 14	87.0	12.7	 16
614	 14	78.5	14.0	 16
615	 14	91.5	15.6	 16
616	 14	141.5	17.6	 16
617	 14	104.0	14.4	 16
618	 14	82.0	12.1	 16
619	 14	104.3	12.2	 16
620	 14	66.0	12.4	 16
621	 14	80.8	42.5	 16
622	 14	76.3	9.1	 16
623	 14	79.5	15.2	 16
624	 14	72.8	12.7	 16
625	 14	74.0	13.5	 16
626	 14	62.5	6.8	 16
627	 14	60.3	8.2	 16
628	 14	76.3	45.7	 16
629	 14	112.0	79.7	 16
630	 14	306.8	36.0	 16
631	 14	192.3	27.5	 16
632	 14	104.8	17.8	 16
633	 14	222.3	29.5	 16
634	 14	434.0	40.4	 16
635	 14	100.5	14.2	 16
636	 14	92.0	14.2	 16
637	 14	76.5	11.5	 16
638	 14	103.5	13.0	 16
639	 14	88.0	18.5	 16
640	 14	73.0	13.3	 16
641	 14	106.0	15.7	 16
642	 14	102.3	11.5	 16
643	 14	101.8	14.4	 16
644	 14	109.3	12.8	 16
645	 14	104.3	14.1	 16
646	 14	82.5	11.3	 16
647	 14	94.3	17.6	 16
648	 14	78.3	13.6	 16
649	 14	69.8	14.1	 16
650	 14	80.0	17.4	 16
651	 14	61.3	9.8	 16
652	 14	94.0	14.5	 16
653	 14	84.0	17.2	 16
654	 14	74.0	9.9	 16
655	 14	62.5	10.5	 16
656	 14	74.0	12.4	 16
657	 14	73.5	13.3	 16
658	 14	131.8	16.8	 16
659	 14	129.5	21.7	 16
660	 14	799.3	143.5	 16
661	 14	309.0	31.6	 16
662	 14	206.0	18.0	 16
663	 14	132.3	19.0	 16
664	 14	148.8	25.5	 16
665	 14	102.5	17.6	 16
666	 14	235.5	34.2	 16
667	 14	60.0	9.0	 16
668	 14	107.8	18.6	 16
669	 14	76.5	12.5	 16
670	 14	81.5	15.4	 16
671	 14	75.0	10.8	 16
672	 14	71.3	12.5	 16
673	 14	73.3	15.3	 16
674	 14	69.5	9.0	 16
675	 14	80.3	13.0	 16
676	 14	72.3	9.1	 16
677	 14	92.3	17.9	 16
678	 14	77.0	18.9	 16
679	 14	94.0	14.3	 16
680	 14	122.0	28.1	 16
681	 14	63.0	7.0	 16
682	 14	92.0	13.0	 16
683	 14	88.8	10.6	 16
684	 14	85.3	12.6	 16
685	 14	84.3	9.9	 16
686	 14	77.3	13.0	 16
687	 14	80.5	13.0	 16
688	 14	97.3	16.4	 16
689	 14	135.8	25.0	 16
690	 14	84.8	11.4	 16
691	 14	141.3	21.9	 16
692	 14	129.3	13.0	 16
693	 14	160.5	33.3	 16
694	 14	68.8	10.5	 16
695	 14	65.8	9.6	 16
696	 14	70.3	11.0	 16
697	 14	105.8	25.2	 16
698	 14	301.8	43.2	 16
699	 14	328.8	66.1	 16
700	 14	114.3	19.1	 16
701	 14	139.8	15.8	 16
702	 14	318.5	51.1	 16
703	 14	92.8	15.5	 16
704	 14	129.0	17.3	 16
705	 14	148.3	27.9	 16
706	 14	136.0	21.5	 16
707	 14	248.3	29.6	 16
708	 14	108.5	14.6	 16
709	 14	95.0	14.8	 16
710	 14	105.5	15.9	 16
711	 14	343.0	87.2	 16
  0	 15	111.0	21.8	 16
  1	 15	110.3	16.4	 16
  2	 15	120.0	21.8	 16
  3	 15	88.5	12.0	 16
  4	 15	112.0	16.2	 16
  5	 15	87.0	11.5	 16
  6	 15	120.5	20.7	 16
  7	 15	331.3	52.3	 16
  8	 15	87.5	16.7	 16
  9	 15	143.0	20.0	 16
 10	 15	95.0	21.0	 16
 11	 15	89.3	18.3	 16
 12	 15	237.3	40.9	 16
 13	 15	86.8	14.2	 16
 14	 15	85.8	11.8	 16
 15	 15	113.3	16.6	 16
 16	 15	226.8	28.9	 16
 17	 15	183.3	25.3	 16
 18	 15	135.5	23.4	 16
 19	 15	342.3	55.8	 16
 20	 15	181.5	31.6	 16
 21	 15	73.0	14.1	 16
 22	 15	81.8	14.9	 16
 23	 15	147.3	24.1	 20
 24	 15	251.8	42.2	 16
 25	 15	148.5	18.8	 16
 26	 15	98.5	14.4	 16
 27	 15	88.0	16.9	 16
 28	 15	464.3	88.0	 16
 29	 15	553.0	92.8	 12
 30	 15	110.8	16.1	 16
 31	 15	250.0	41.1	 16
 32	 15	82.3	13.6	 16
 33	 15	814.8	157.6	 16
 34	 15	112.3	17.2	 16
 35	 15	117.3	23.6	 16
 36	 15	89.5	21.3	 16
 37	 15	132.3	26.3	 16
 38	 15	88.3	12.3	 16
 39	 15	91.5	13.3	 16
 40	 15	86.3	15.3	 16
 41	 15	132.0	25.6	 16
 42	 15	91.0	15.2	 16
 43	 15	132.8	18.9	 16
 44	 15	176.3	28.9	 16
 45	 15	133.8	18.7	 16
 46	 15	123.3	16.6	 16
 47	 15	119.5	24.9	 16
 48	 15	913.5	131.3	 16
 49	 15	252.3	39.5	 16
 50	 15	419.5	73.3	 16
 51	 15	200.8	34.9	 16
 52	 15	154.8	25.1	 16
 53	 15	126.3	21.0	 16
 54	 15	87.3	19.5	 16
 55	 15	86.5	11.6	 16
 56	 15	109.5	17.0	 16
 57	 15	110.5	13.0	 16
 58	 15	1020.8	166.0	 16
 59	 15	372.8	70.0	 16
 60	 15	76.5	15.7	 16
 61	 15	149.8	35.3	 16
 62	 15	226.0	38.6	 16
 63	 15	83.3	12.1	 16
 64	 15	159.5	28.5	 16
 65	 15	124.0	20.8	 16
 66	 15	81.8	15.3	 16
 67	 15	106.3	15.6	 16
 68	 15	370.5	36.8	 16
 69	 15	117.5	18.8	 16
 70	 15	151.3	19.9	 16
 71	 15	148.8	21.1	 16
 72	 15	131.0	22.4	 16
 73	 15	254.0	30.7	 16
 74	 15	832.0	93.3	 16
 75	 15	64.5	10.5	 16
 76	 15	762.8	107.6	 16
 77	 15	104.0	11.9	 16
 78	 15	78.3	16.5	 16
 79	 15	204.0	43.9	 16
 80	 15	70.8	14.6	 16
 81	 15	180.0	19.6	 16
 82	 15	68.0	10.5	 16
 83	 15	76.3	11.2	 16
 84	 15	88.5	16.6	 16
 85	 15	482.3	74.3	 16
 86	 15	239.0	26.3	 16
 87	 15	111.0	21.2	 16
 88	 15	99.0	22.0	 16
 89	 15	234.5	28.0	 16
 90	 15	154.8	26.2	 16
 91	 15	224.8	32.5	 16
 92	 15	184.8	44.4	 16
 93	 15	172.8	18.2	 16
 94	 15	1007.5	95.6	 16
 95	 15	487.3	56.8	 16
 96	 15	226.5	29.8	 16
 97	 15	84.3	12.2	 16
 98	 15	136.0	20.6	 16
 99	 15	111.3	10.5	 16
100	 15	96.5	18.9	 16
101	 15	2759.3	303.2	 16
102	 15	199.8	30.0	 16
103	 15	102.3	16.3	 16
104	 15	1812.0	261.3	 16
105	 15	326.8	34.8	 16
106	 15	93.0	13.9	 16
107	 15	72.8	15.7	 16
108	 15	146.8	20.5	 16
109	 15	184.3	31.0	 16
110	 15	81.0	16.7	 16
111	 15	155.3	24.3	 16
112	 15	149.5	20.0	 16
113	 15	105.8	17.3	 16
114	 15	182.5	18.2	 16
115	 15	323.0	35.2	 16
116	 15	213.0	24.8	 16
117	 15	103.5	14.7	 16
118	 15	324.3	41.5	 16
119	 15	80.3	16.1	 16
120	 15	169.3	30.2	 16
121	 15	196.8	24.7	 16
122	 15	86.5	16.7	 16
123	 15	158.3	20.3	 16
124	 15	143.5	24.2	 16
125	 15	96.0	19.1	 16
126	 15	297.3	35.6	 16
127	 15	82.3	11.6	 16
128	 15	95.5	13.4	 16
129	 15	73.8	11.1	 16
130	 15	84.0	15.5	 16
131	 15	570.5	68.0	 16
132	 15	256.5	22.2	 16
133	 15	97.0	13.1	 16
134	 15	230.3	21.4	 16
135	 15	96.3	36.7	 16
136	 15	96.3	15.2	 16
137	 15	1288.5	197.2	 16
138	 15	1396.5	168.6	 16
139	 15	213.0	33.8	 16
140	 15	105.8	19.8	 16
141	 15	89.8	14.0	 16
142	 15	94.8	15.2	 16
143	 15	100.0	20.1	 16
144	 15	372.3	42.2	 16
145	 15	267.5	35.1	 16
146	 15	193.5	26.0	 16
147	 15	77.5	18.2	 16
148	 15	363.0	37.8	 16
149	 15	119.8	20.7	 16
150	 15	187.3	27.4	 16
151	 15	274.0	34.4	 16
152	 15	197.0	27.9	 16
153	 15	165.8	26.3	 16
154	 15	164.0	23.8	 16
155	 15	74.5	10.5	 16
156	 15	101.3	13.7	 16
157	 15	207.0	22.5	 16
158	 15	153.5	26.7	 16
159	 15	236.0	31.4	 16
160	 15	292.5	36.5	 16
161	 15	737.5	104.6	 16
162	 15	109.0	16.9	 16
163	 15	132.3	22.6	 16
164	 15	66.8	9.8	 16
165	 15	81.8	15.0	 16
166	 15	101.3	16.8	 16
167	 15	155.5	31.0	 16
168	 15	201.3	35.1	 16
169	 15	135.0	15.6	 16
170	 15	118.3	21.9	 16
171	 15	96.8	39.7	 16
172	 15	96.3	12.8	 16
173	 15	93.3	15.9	 16
174	 15	72.0	13.8	 16
175	 15	109.5	17.3	 16
176	 15	88.0	16.4	 16
177	 15	120.0	12.9	 16
178	 15	403.0	35.1	 16
179	 15	116.8	19.0	 16
180	 15	118.3	18.0	 16
181	 15	81.8	13.2	 16
182	 15	523.3	38.0	 16
183	 15	123.5	23.9	 16
184	 15	137.8	25.4	 16
185	 15	104.3	16.5	 16
186	 15	82.5	9.2	 16
187	 15	63.3	12.1	 16
188	 15	341.0	54.2	 16
189	 15	292.0	33.5	 16
190	 15	293.3	35.2	 16
191	 15	71.3	10.5	 16
192	 15	127.3	15.0	 16
193	 15	115.3	15.9	 16
194	 15	199.5	25.7	 16
195	 15	144.3	18.9	 16
196	 15	88.3	13.6	 16
197	 15	185.0	32.4	 16
198	 15	85.0	14.3	 16
199	 15	84.5	18.2	 16
200	 15	69.0	12.2	 16
201	 15	387.5	64.8	 20
202	 15	150.5	19.0	 16
203	 15	134.3	18.9	 16
204	 15	92.5	16.5	 16
205	 15	162.0	21.8	 16
206	 15	282.0	44.4	 16
207	 15	118.5	19.4	 16
208	 15	151.5	16.6	 16
209	 15	143.0	15.4	 16
210	 15	115.5	16.4	 16
211	 15	103.5	16.3	 16
212	 15	118.3	18.0	 16
213	 15	76.3	13.5	 16
214	 15	160.8	22.8	 16
215	 15	100.0	18.9	 16
216	 15	2227.5	414.0	 16
217	 15	142.5	15.3	 16
218	 15	1934.5	345.8	 16
219	 15	371.3	71.0	 16
220	 15	133.0	26.1	 16
221	 15	152.3	21.0	 16
222	 15	111.0	19.9	 16
223	 15	118.3	17.8	 16
224	 15	77.8	13.0	 16
225	 15	96.3	21.1	 16
226	 15	171.0	33.7	 16
227	 15	68.8	7.7	 16
228	 15	100.5	21.1	 16
229	 15	422.5	44.8	 16
230	 15	122.5	22.5	 16
231	 15	86.0	16.5	 16
232	 15	211.0	30.6	 16
233	 15	72.3	13.2	 16
234	 15	114.3	15.4	 16
235	 15	320.5	43.9	 16
236	 15	502.0	51.2	 16
237	 15	251.8	34.2	 16
238	 15	522.8	70.4	 16
239	 15	142.0	27.4	 16
240	 15	98.5	13.5	 16
241	 15	225.0	43.1	 16
242	 15	621.3	73.7	 16
243	 15	84.0	14.1	 16
244	 15	93.8	17.0	 16
245	 15	142.5	25.0	 16
246	 15	144.3	29.3	 16
247	 15	85.0	16.9	 16
248	 15	226.5	37.8	 16
249	 15	905.5	65.0	 16
250	 15	71.3	9.8	 16
251	 15	83.3	12.6	 16
252	 15	238.3	27.3	 16
253	 15	145.8	20.1	 16
254	 15	769.8	73.1	 16
255	 15	149.0	17.0	 16
256	 15	134.8	18.6	 16
257	 15	335.3	20.8	 16
258	 15	70.5	11.2	 16
259	 15	68.8	9.7	 16
260	 15	160.5	35.1	 16
261	 15	131.3	18.6	 16
262	 15	187.0	22.8	 16
263	 15	156.3	20.7	 16
264	 15	172.0	17.4	 16
265	 15	113.3	15.8	 16
266	 15	77.3	11.7	 16
267	 15	119.0	12.2	 16
268	 15	148.3	23.8	 16
269	 15	187.5	23.4	 16
270	 15	79.0	10.9	 16
271	 15	79.5	13.7	 16
272	 15	168.5	20.0	 16
273	 15	142.0	54.2	 16
274	 15	199.0	28.0	 16
275	 15	202.8	19.1	 16
276	 15	232.0	19.7	 16
277	 15	92.0	12.7	 16
278	 15	65.8	10.8	 16
279	 15	253.8	47.0	 16
280	 15	390.8	52.2	 16
281	 15	102.3	18.1	 16
282	 15	219.3	28.9	 16
283	 15	72.8	9.4	 16
284	 15	89.8	15.5	 16
285	 15	136.5	16.3	 16
286	 15	116.5	21.2	 16
287	 15	219.8	20.6	 16
288	 15	979.3	131.3	 16
289	 15	149.0	19.9	 16
290	 15	223.5	33.9	 16
291	 15	107.0	18.2	 16
292	 15	926.8	104.0	 16
293	 15	374.3	42.5	 16
294	 15	170.3	47.4	 16
295	 15	81.3	10.4	 16
296	 15	207.8	30.1	 16
297	 15	697.8	89.5	 16
298	 15	131.3	13.3	 16
299	 15	131.0	19.8	 16
300	 15	79.3	14.9	 16
301	 15	122.3	14.0	 16
302	 15	96.3	15.0	 16
303	 15	82.3	11.3	 16
304	 15	410.3	65.6	 16
305	 15	84.0	12.7	 16
306	 15	137.3	15.6	 16
307	 15	162.0	25.2	 16
308	 15	274.3	37.8	 16
309	 15	119.5	9.5	 16
310	 15	328.0	37.2	 16
311	 15	258.5	27.2	 16
312	 15	132.8	21.4	 16
313	 15	84.3	15.6	 16
314	 15	162.5	19.0	 16
315	 15	210.8	30.8	 16
316	 15	561.3	62.6	 16
317	 15	176.5	18.9	 16
318	 15	110.0	9.5	 16
319	 15	201.8	29.7	 16
320	 15	105.5	20.7	 16
321	 15	169.3	26.5	 16
322	 15	227.3	23.0	 16
323	 15	123.8	21.7	 16
324	 15	671.0	67.0	 16
325	 15	136.0	24.4	 16
326	 15	115.8	15.7	 16
327	 15	134.5	16.6	 16
328	 15	78.3	8.9	 16
329	 15	72.0	12.1	 16
330	 15	909.5	143.0	 16
331	 15	270.0	28.9	 16
332	 15	390.5	50.7	 16
333	 15	329.5	34.7	 16
334	 15	92.5	20.7	 16
335	 15	67.3	19.1	 16
336	 15	76.3	11.2	 16
337	 15	429.3	54.6	 16
338	 15	322.3	54.1	 16
339	 15	410.8	40.8	 16
340	 15	199.3	27.2	 16
341	 15	140.8	26.5	 16
342	 15	84.5	16.0	 16
343	 15	79.8	17.6	 16
344	 15	141.3	18.5	 16
345	 15	112.3	18.6	 16
346	 15	146.8	27.2	 16
347	 15	74.0	14.8	 16
348	 15	286.5	42.4	 16
349	 15	76.8	12.4	 16
350	 15	164.5	22.2	 16
351	 15	134.3	18.4	 16
352	 15	82.3	8.8	 16
353	 15	163.0	21.1	 16
354	 15	66.5	12.5	 16
355	 15	192.8	25.5	 16
356	 15	456.8	52.3	 16
357	 15	254.8	25.2	 16
358	 15	274.5	33.5	 16
359	 15	287.5	31.3	 16
360	 15	71.5	14.6	 16
361	 15	117.3	11.9	 16
362	 15	195.5	36.6	 16
363	 15	76.3	11.9	 16
364	 15	149.0	18.3	 16
365	 15	91.0	23.3	 16
366	 15	155.8	23.5	 16
367	 15	176.3	22.1	 16
368	 15	91.5	12.9	 16
369	 15	75.8	12.7	 16
370	 15	92.0	15.9	 16
371	 15	93.0	17.1	 16
372	 15	118.5	22.8	 16
373	 15	396.0	50.3	 16
374	 15	75.0	10.1	 16
375	 15	215.8	20.7	 16
376	 15	188.3	16.7	 16
377	 15	119.3	19.4	 16
378	 15	114.5	24.4	 16
379	 15	196.5	30.0	 20
380	 15	82.3	13.7	 16
381	 15	73.5	9.6	 16
382	 15	75.3	12.1	 16
383	 15	151.8	19.0	 16
384	 15	87.0	15.1	 16
385	 15	507.0	48.3	 16
386	 15	105.0	16.0	 16
387	 15	361.8	47.3	 16
388	 15	234.3	27.1	 16
389	 15	200.0	29.0	 16
390	 15	74.0	9.8	 16
391	 15	99.3	26.9	 16
392	 15	98.3	14.4	 16
393	 15	603.8	79.2	 16
394	 15	442.0	42.4	 16
395	 15	182.8	26.0	 16
396	 15	85.3	14.1	 16
397	 15	97.5	16.1	 16
398	 15	115.0	16.9	 16
399	 15	78.3	14.5	 16
400	 15	157.0	25.0	 16
401	 15	133.8	15.2	 16
402	 15	124.3	20.1	 16
403	 15	102.8	15.5	 16
404	 15	1356.5	155.7	 16
405	 15	248.8	30.7	 16
406	 15	133.0	18.1	 16
407	 15	899.0	63.2	 16
408	 15	199.3	23.9	 16
409	 15	110.3	27.6	 16
410	 15	141.0	13.9	 16
411	 15	218.3	28.5	 16
412	 15	81.0	15.8	 16
413	 15	355.5	51.3	 16
414	 15	110.3	18.5	 16
415	 15	258.3	37.4	 16
416	 15	175.3	20.3	 16
417	 15	303.0	30.3	 16
418	 15	158.5	37.8	 16
419	 15	155.8	17.4	 16
420	 15	82.8	12.0	 16
421	 15	82.5	11.1	 16
422	 15	67.8	10.9	 16
423	 15	191.3	26.3	 16
424	 15	147.5	16.4	 16
425	 15	68.3	8.0	 16
426	 15	87.3	11.1	 16
427	 15	164.5	38.5	 16
428	 15	79.3	12.3	 16
429	 15	84.3	7.4	 16
430	 15	86.8	13.3	 16
431	 15	9146.5	1758.9	 16
432	 15	106.0	14.7	 16
433	 15	103.5	16.2	 16
434	 15	384.8	47.5	 16
435	 15	313.8	37.8	 16
436	 15	143.5	15.5	 16
437	 15	342.5	23.0	 16
438	 15	237.0	33.7	 16
439	 15	152.0	25.5	 16
440	 15	7484.8	612.3	 16
441	 15	270.3	28.9	 16
442	 15	72.3	10.1	 16
443	 15	182.5	25.1	 16
444	 15	287.0	32.4	 16
445	 15	363.8	41.8	 16
446	 15	293.3	30.1	 16
447	 15	297.8	36.9	 16
448	 15	316.5	23.9	 16
449	 15	355.3	27.5	 16
450	 15	377.8	45.4	 16
451	 15	1188.3	100.2	 16
452	 15	89.0	12.1	 16
453	 15	221.0	30.0	 16
454	 15	357.8	39.3	 16
455	 15	97.5	12.5	 16
456	 15	67.0	9.9	 16
457	 15	126.3	16.9	 16
458	 15	247.8	34.2	 16
459	 15	105.5	15.4	 16
460	 15	91.3	11.9	 16
461	 15	120.3	22.3	 16
462	 15	84.0	15.5	 16
463	 15	77.5	10.6	 16
464	 15	116.8	14.2	 16
465	 15	82.5	10.6	 16
466	 15	97.3	13.3	 16
467	 15	140.3	17.9	 16
468	 15	198.0	29.7	 16
469	 15	277.3	33.7	 16
470	 15	92.3	17.6	 16
471	 15	281.3	46.7	 16
472	 15	104.0	72.9	 16
473	 15	130.3	22.8	 16
474	 15	160.8	14.1	 16
475	 15	130.3	19.3	 16
476	 15	75.5	9.7	 16
477	 15	292.5	39.3	 16
478	 15	977.0	139.0	 16
479	 15	147.5	14.3	 16
480	 15	128.5	22.1	 16
481	 15	315.0	61.4	 16
482	 15	85.0	12.4	 16
483	 15	72.0	15.7	 16
484	 15	81.0	10.2	 16
485	 15	75.5	12.4	 16
486	 15	128.0	20.2	 16
487	 15	96.3	16.6	 16
488	 15	132.3	19.6	 16
489	 15	83.0	13.3	 16
490	 15	94.0	15.2	 16
491	 15	66.8	11.3	 16
492	 15	363.0	52.4	 16
493	 15	132.8	17.9	 16
494	 15	65.5	10.0	 16
495	 15	86.8	13.0	 16
496	 15	366.8	64.5	 16
497	 15	73.3	13.2	 16
498	 15	70.3	11.3	 16
499	 15	83.5	9.9	 16
500	 15	77.8	13.3	 16
501	 15	83.8	18.0	 16
502	 15	92.8	15.9	 16
503	 15	352.8	43.9	 16
504	 15	153.8	28.5	 16
505	 15	258.5	31.0	 16
506	 15	90.5	7.0	 16
507	 15	596.8	85.3	 16
508	 15	157.8	22.0	 16
509	 15	95.0	13.2	 16
510	 15	113.3	15.1	 16
511	 15	157.0	32.4	 16
512	 15	82.5	14.2	 16
513	 15	93.3	14.8	 16
514	 15	82.3	13.4	 16
515	 15	106.3	18.9	 16
516	 15	134.3	20.4	 16
517	 15	194.3	28.9	 16
518	 15	103.5	15.7	 16
519	 15	122.5	20.2	 16
520	 15	66.3	10.4	 16
521	 15	66.5	10.7	 16
522	 15	87.0	13.7	 16
523	 15	196.3	33.9	 16
524	 15	72.5	13.1	 16
525	 15	362.5	53.3	 16
526	 15	202.5	21.9	 16
527	 15	114.3	15.5	 16
528	 15	175.0	22.8	 16
529	 15	151.3	31.0	 16
530	 15	176.8	27.6	 16
531	 15	186.3	30.4	 16
532	 15	72.3	12.0	 16
533	 15	62.0	7.5	 16
534	 15	86.0	19.6	 16
535	 15	403.5	86.7	 16
536	 15	164.0	27.7	 16
537	 15	312.5	51.5	 16
538	 15	237.3	26.1	 16
539	 15	120.3	10.8	 16
540	 15	1035.8	203.4	 16
541	 15	80.8	15.7	 16
542	 15	90.5	13.4	 16
543	 15	105.0	18.2	 16
544	 15	409.0	140.6	 16
545	 15	174.0	39.8	 16
546	 15	90.8	15.8	 16
547	 15	269.8	69.0	 16
548	 15	188.0	38.2	 16
549	 15	65.5	6.8	 16
550	 15	74.8	15.0	 16
551	 15	69.3	10.1	 16
552	 15	118.3	20.3	 16
553	 15	380.3	98.7	 16
554	 15	134.3	28.7	 16
555	 15	89.5	16.9	 16
556	 15	841.0	208.6	 16
557	 15	279.8	48.8	 20
558	 15	87.0	11.2	 16
559	 15	190.0	38.0	 16
560	 15	66.0	9.3	 16
561	 15	346.5	41.3	 16
562	 15	95.3	10.4	 16
563	 15	128.5	18.7	 16
564	 15	89.3	10.0	 16
565	 15	98.8	14.1	 16
566	 15	268.3	37.5	 16
567	 15	175.3	31.3	 16
568	 15	173.0	31.1	 16
569	 15	176.3	22.0	 16
570	 15	336.0	39.5	 16
571	 15	113.5	17.1	 16
572	 15	133.3	19.0	 16
573	 15	796.0	133.2	 16
574	 15	75.3	12.9	 16
575	 15	74.0	13.7	 16
576	 15	177.8	27.8	 16
577	 15	309.3	42.8	 16
578	 15	79.8	8.6	 16
579	 15	109.0	14.4	 16
580	 15	238.0	30.6	 16
581	 15	92.3	10.8	 16
582	 15	99.3	15.0	 16
583	 15	98.3	15.4	 16
584	 15	118.0	14.7	 16
585	 15	107.8	15.6	 16
586	 15	591.3	87.5	 16
587	 15	135.0	20.6	 16
588	 15	99.3	11.0	 16
589	 15	74.3	11.1	 16
590	 15	62.3	9.3	 16
591	 15	101.8	13.8	 16
592	 15	240.5	36.0	 16
593	 15	169.3	21.1	 16
594	 15	91.3	14.5	 16
595	 15	177.3	32.1	 16
596	 15	145.8	27.7	 16
597	 15	127.0	13.2	 16
598	 15	136.5	22.9	 16
599	 15	164.3	26.8	 16
600	 15	528.0	46.3	 16
601	 15	234.8	22.0	 16
602	 15	201.3	21.6	 16
603	 15	68.3	13.7	 16
604	 15	129.5	21.1	 16
605	 15	178.5	17.3	 16
606	 15	117.8	19.2	 16
607	 15	402.8	52.8	 16
608	 15	353.5	66.2	 16
609	 15	101.5	15.7	 16
610	 15	72.3	13.4	 16
611	 15	66.3	10.4	 16
612	 15	102.5	17.5	 16
613	 15	259.3	26.9	 16
614	 15	196.3	19.1	 16
615	 15	95.3	15.0	 16
616	 15	125.3	17.2	 16
617	 15	264.8	30.8	 16
618	 15	90.3	14.9	 16
619	 15	180.5	11.5	 16
620	 15	337.5	27.0	 16
621	 15	148.3	18.4	 16
622	 15	1201.8	83.7	 16
623	 15	582.3	74.5	 16
624	 15	87.3	16.8	 16
625	 15	134.5	15.6	 16
626	 15	95.0	18.9	 16
627	 15	116.5	17.5	 16
628	 15	118.3	14.4	 16
629	 15	106.0	16.2	 16
630	 15	177.0	16.8	 16
631	 15	123.8	16.1	 16
632	 15	146.8	21.6	 16
633	 15	235.8	27.4	 16
634	 15	240.8	27.4	 16
635	 15	173.0	28.3	 16
636	 15	188.3	25.3	 16
637	 15	139.3	27.0	 16
638	 15	231.0	31.4	 16
639	 15	97.3	12.4	 16
640	 15	134.8	20.3	 16
641	 15	221.0	34.6	 16
642	 15	114.5	14.7	 16
643	 15	326.3	59.6	 16
644	 15	130.0	21.1	 16
645	 15	152.3	28.2	 16
646	 15	175.8	24.3	 16
647	 15	101.5	16.3	 16
648	 15	196.0	34.1	 16
649	 15	136.5	27.9	 16
650	 15	71.3	12.1	 16
651	 15	75.5	25.1	 16
652	 15	87.3	13.9	 16
653	 15	147.0	19.7	 16
654	 15	75.5	14.7	 16
655	 15	67.5	10.0	 16
656	 15	1491.3	285.7	 16
657	 15	91.3	14.5	 16
658	 15	87.8	11.8	 16
659	 15	79.8	11.4	 16
660	 15	311.3	37.3	 16
661	 15	106.5	18.5	 16
662	 15	2234.5	431.6	 16
663	 15	93.0	13.7	 16
664	 15	111.5	18.5	 16
665	 15	227.3	35.3	 16
666	 15	71.0	11.0	 16
667	 15	67.3	14.2	 16
668	 15	94.0	15.5	 16
669	 15	68.0	12.9	 16
670	 15	92.0	19.2	 16
671	 15	208.5	39.6	 16
672	 15	95.8	14.5	 16
673	 15	202.5	36.6	 16
674	 15	124.3	17.2	 16
675	 15	2886.0	482.2	 16
676	 15	148.8	13.1	 16
677	 15	93.3	14.1	 16
678	 15	182.5	35.2	 16
679	 15	98.0	13.7	 16
680	 15	70.3	10.0	 16
681	 15	66.3	9.4	 16
682	 15	69.5	8.1	 16
683	 15	154.3	17.3	 16
684	 15	172.8	30.9	 16
685	 15	179.8	31.3	 16
686	 15	754.8	156.7	 16
687	 15	93.5	20.8	 16
688	 15	168.3	26.1	 16
689	 15	79.5	19.3	 16
690	 15	323.5	64.8	 16
691	 15	99.3	16.1	 16
692	 15	2659.0	564.0	 16
693	 15	73.3	16.4	 16
694	 15	180.3	19.2	 16
695	 15	72.5	12.9	 16
696	 15	80.3	13.2	 16
697	 15	110.3	13.5	 16
698	 15	96.3	14.9	 16
699	 15	82.3	14.3	 16
700	 15	82.5	11.4	 16
701	 15	141.0	21.2	 16
702	 15	161.0	16.7	 16
703	 15	73.0	10.5	 16
704	 15	210.0	29.3	 16
705	 15	253.3	36.7	 16
706	 15	114.0	16.1	 16
707	 15	109.0	17.3	 16
708	 15	216.3	34.8	 16
709	 15	70.5	6.2	 16
710	 15	1577.3	347.4	 16
711	 15	144.5	18.8	 16
  0	 16	8071.8	1200.2	 16
  1	 16	124.0	29.3	 16
  2	 16	77.8	12.0	 16
  3	 16	82.8	10.1	 16
  4	 16	86.3	13.5	 16
  5	 16	78.0	12.9	 16
  6	 16	132.0	25.3	 16
  7	 16	83.3	11.1	 16
  8	 16	76.0	11.7	 16
  9	 16	80.5	9.2	 16
 10	 16	77.0	14.7	 16
 11	 16	79.5	13.5	 16
 12	 16	116.3	16.5	 16
 13	 16	78.8	12.1	 16
 14	 16	77.5	9.5	 16
 15	 16	76.3	16.3	 16
 16	 16	212.3	19.6	 16
 17	 16	151.3	15.8	 16
 18	 16	108.3	28.0	 16
 19	 16	142.0	20.1	 16
 20	 16	120.8	20.0	 16
 21	 16	61.8	12.4	 16
 22	 16	77.3	12.1	 16
 23	 16	72.0	8.9	 16
 24	 16	128.8	22.5	 16
 25	 16	109.3	21.6	 16
 26	 16	87.0	16.4	 16
 27	 16	69.3	10.1	 16
 28	 16	118.0	14.4	 16
 29	 16	152.8	21.8	 16
 30	 16	103.5	15.9	 16
 31	 16	179.8	43.8	 16
 32	 16	83.3	13.0	 16
 33	 16	89.3	17.6	 16
 34	 16	86.3	13.1	 16
 35	 16	134.0	13.2	 16
 36	 16	85.5	14.3	 16
 37	 16	77.0	12.3	 16
 38	 16	68.0	13.8	 16
 39	 16	72.3	9.3	 16
 40	 16	75.0	15.8	 16
 41	 16	95.3	16.9	 16
 42	 16	82.8	11.3	 20
 43	 16	116.3	19.3	 16
 44	 16	194.8	35.3	 16
 45	 16	140.0	16.0	 16
 46	 16	75.3	15.8	 16
 47	 16	121.3	23.0	 16
 48	 16	668.3	97.9	 16
 49	 16	143.8	23.7	 16
 50	 16	121.3	17.6	 16
 51	 16	222.3	24.9	 16
 52	 16	166.8	23.2	 16
 53	 16	82.5	14.1	 16
 54	 16	73.3	15.1	 16
 55	 16	90.0	19.8	 16
 56	 16	109.8	19.1	 16
 57	 16	111.0	17.1	 16
 58	 16	361.5	64.0	 16
 59	 16	105.5	13.2	 16
 60	 16	87.0	16.6	 16
 61	 16	83.3	11.3	 16
 62	 16	130.5	19.7	 16
 63	 16	79.0	16.7	 16
 64	 16	212.0	20.8	 16
 65	 16	81.8	17.7	 16
 66	 16	74.8	11.2	 16
 67	 16	135.3	17.2	 16
 68	 16	166.3	25.2	 16
 69	 16	238.8	28.0	 16
 70	 16	213.8	34.6	 16
 71	 16	121.0	18.4	 16
 72	 16	323.3	47.8	 16
 73	 16	322.3	65.5	 16
 74	 16	1731.3	230.6	 16
 75	 16	71.3	12.6	 16
 76	 16	296.3	48.2	 16
 77	 16	135.3	28.4	 16
 78	 16	76.8	11.4	 16
 79	 16	86.0	13.5	 16
 80	 16	70.8	16.0	 16
 81	 16	151.8	23.9	 16
 82	 16	76.8	16.4	 16
 83	 16	90.8	12.4	 16
 84	 16	71.5	8.8	 16
 85	 16	82.0	15.4	 16
 86	 16	98.8	17.4	 16
 87	 16	68.5	18.4	 16
 88	 16	91.5	15.3	 16
 89	 16	118.3	21.7	 16
 90	 16	135.3	42.4	 16
 91	 16	117.3	19.5	 16
 92	 16	104.3	12.4	 16
 93	 16	72.3	12.7	 16
 94	 16	108.8	17.8	 16
 95	 16	154.0	24.4	 16
 96	 16	141.3	25.4	 16
 97	 16	84.3	12.7	 16
 98	 16	111.0	18.7	 16
 99	 16	98.0	33.4	 16
100	 16	93.3	18.4	 16
101	 16	426.0	60.8	 16
102	 16	82.3	14.7	 16
103	 16	79.8	15.1	 16
104	 16	306.3	57.4	 16
105	 16	242.8	31.2	 16
106	 16	104.3	18.8	 16
107	 16	67.5	12.8	 16
108	 16	133.3	17.7	 16
109	 16	81.5	15.9	 16
110	 16	79.3	11.9	 16
111	 16	153.3	14.8	 16
112	 16	118.3	13.8	 16
113	 16	129.3	23.8	 16
114	 16	162.5	29.2	 16
115	 16	265.3	30.6	 16
116	 16	110.3	17.7	 16
117	 16	168.0	22.0	 16
118	 16	275.3	41.5	 16
119	 16	75.0	10.8	 16
120	 16	74.0	13.9	 16
121	 16	145.3	20.2	 16
122	 16	84.8	14.4	 16
123	 16	80.0	12.9	 16
124	 16	94.0	9.9	 16
125	 16	74.5	12.6	 16
126	 16	95.8	16.0	 16
127	 16	78.0	16.1	 16
128	 16	69.3	12.7	 16
129	 16	70.3	11.3	 16
130	 16	90.8	22.9	 16
131	 16	135.0	20.2	 16
132	 16	112.5	20.5	 16
133	 16	71.3	13.7	 16
134	 16	76.3	13.8	 16
135	 16	77.0	15.6	 16
136	 16	79.8	15.8	 16
137	 16	397.5	43.3	 16
138	 16	209.0	42.3	 16
139	 16	111.3	13.0	 16
140	 16	68.8	10.7	 16
141	 16	79.3	13.9	 16
142	 16	76.5	12.0	 16
143	 16	156.0	22.5	 16
144	 16	405.3	26.1	 16
145	 16	178.5	23.1	 16
146	 16	87.3	12.4	 16
147	 16	85.0	11.4	 16
148	 16	602.0	52.0	 16
149	 16	182.5	33.8	 16
150	 16	145.3	14.8	 16
151	 16	174.3	27.9	 16
152	 16	69.3	13.7	 16
153	 16	80.8	22.2	 16
154	 16	101.0	17.9	 16
155	 16	67.0	11.3	 16
156	 16	73.3	18.2	 16
157	 16	154.5	27.4	 16
158	 16	189.5	18.6	 16
159	 16	239.3	27.5	 16
160	 16	329.5	35.5	 16
161	 16	246.5	32.6	 16
162	 16	96.3	13.2	 16
163	 16	118.0	17.4	 16
164	 16	67.0	10.8	 16
165	 16	68.3	11.4	 16
166	 16	81.0	19.3	 16
167	 16	97.0	16.8	 16
168	 16	95.3	12.3	 16
169	 16	84.3	14.9	 16
170	 16	71.5	16.9	 16
171	 16	67.5	12.5	 16
172	 16	88.5	12.6	 16
173	 16	89.0	24.9	 16
174	 16	72.3	10.9	 16
175	 16	77.0	12.7	 16
176	 16	92.8	14.7	 16
177	 16	184.8	18.1	 16
178	 16	1146.3	60.3	 16
179	 16	130.3	18.2	 16
180	 16	98.3	17.9	 16
181	 16	206.0	34.6	 16
182	 16	271.5	37.1	 16
183	 16	182.8	22.1	 16
184	 16	153.3	18.2	 16
185	 16	89.3	18.6	 16
186	 16	83.0	11.6	 16
187	 16	75.5	12.9	 16
188	 16	138.8	23.2	 16
189	 16	157.5	19.2	 16
190	 16	181.3	24.2	 16
191	 16	80.0	14.2	 16
192	 16	96.3	14.6	 16
193	 16	104.3	15.1	 16
194	 16	194.8	26.5	 16
195	 16	138.3	18.7	 16
196	 16	82.0	11.1	 16
197	 16	87.5	26.1	 16
198	 16	93.8	17.6	 16
199	 16	73.5	11.4	 16
200	 16	69.5	14.4	 16
201	 16	103.5	12.2	 16
202	 16	195.3	13.1	 16
203	 16	97.3	17.1	 16
204	 16	98.0	17.7	 16
205	 16	143.8	23.8	 16
206	 16	116.3	13.5	 16
207	 16	78.3	13.2	 16
208	 16	117.0	20.6	 16
209	 16	107.3	14.6	 16
210	 16	70.0	13.2	 16
211	 16	70.8	14.9	 16
212	 16	64.3	10.7	 16
213	 16	84.3	17.4	 16
214	 16	75.3	11.9	 16
215	 16	77.3	9.7	 16
216	 16	463.5	82.9	 16
217	 16	112.8	13.1	 16
218	 16	245.3	29.2	 16
219	 16	158.0	20.5	 16
220	 16	90.5	18.1	 20
221	 16	105.0	15.2	 16
222	 16	134.3	20.9	 16
223	 16	72.5	9.7	 16
224	 16	91.8	18.8	 16
225	 16	88.3	10.9	 16
226	 16	83.3	15.1	 16
227	 16	70.8	8.3	 16
228	 16	85.3	11.4	 16
229	 16	496.0	59.3	 16
230	 16	79.0	8.7	 16
231	 16	82.3	12.8	 16
232	 16	72.0	10.2	 16
233	 16	70.8	11.3	 16
234	 16	175.3	23.1	 16
235	 16	319.3	45.9	 16
236	 16	389.5	43.9	 16
237	 16	126.3	18.2	 16
238	 16	86.0	17.4	 16
239	 16	139.3	22.6	 16
240	 16	108.0	18.5	 16
241	 16	90.3	23.7	 16
242	 16	115.8	15.8	 16
243	 16	84.3	12.2	 16
244	 16	84.0	10.1	 16
245	 16	108.3	17.9	 16
246	 16	90.8	18.0	 16
247	 16	103.5	15.2	 16
248	 16	79.0	14.6	 16
249	 16	295.5	49.0	 16
250	 16	76.3	19.9	 16
251	 16	90.8	15.2	 16
252	 16	85.0	20.0	 16
253	 16	110.3	19.5	 16
254	 16	1146.5	111.0	 16
255	 16	189.8	31.4	 16
256	 16	96.3	11.2	 16
257	 16	176.5	23.1	 16
258	 16	88.5	41.4	 16
259	 16	69.5	13.5	 16
260	 16	85.5	21.0	 16
261	 16	131.5	19.5	 16
262	 16	164.0	21.1	 16
263	 16	129.3	16.6	 16
264	 16	133.3	18.6	 16
265	 16	92.5	14.9	 16
266	 16	70.5	12.6	 16
267	 16	116.5	18.2	 16
268	 16	175.8	22.6	 16
269	 16	100.8	14.2	 16
270	 16	71.5	12.1	 16
271	 16	76.3	10.8	 16
272	 16	94.5	14.0	 16
273	 16	86.5	12.2	 16
274	 16	167.0	12.7	 16
275	 16	165.5	15.2	 16
276	 16	151.3	20.6	 16
277	 16	78.5	16.1	 16
278	 16	73.0	12.0	 16
279	 16	100.3	17.2	 16
280	 16	296.5	29.6	 16
281	 16	116.0	15.1	 16
282	 16	108.8	14.7	 16
283	 16	74.3	14.8	 16
284	 16	83.8	11.4	 16
285	 16	105.5	19.9	 16
286	 16	120.3	17.1	 16
287	 16	176.0	23.3	 16
288	 16	431.0	39.9	 16
289	 16	110.0	12.6	 16
290	 16	99.3	19.9	 16
291	 16	91.0	12.9	 16
292	 16	487.3	49.8	 16
293	 16	154.8	25.1	 16
294	 16	95.3	4.2	 16
295	 16	82.3	12.0	 16
296	 16	99.3	14.8	 16
297	 16	301.8	29.0	 16
298	 16	99.5	10.2	 16
299	 16	90.3	17.5	 16
300	 16	66.3	10.4	 16
301	 16	89.0	17.0	 16
302	 16	71.3	10.3	 16
303	 16	69.5	10.5	 16
304	 16	124.5	18.5	 16
305	 16	70.3	13.3	 16
306	 16	104.5	19.6	 16
307	 16	104.8	19.0	 16
308	 16	125.8	20.2	 16
309	 16	114.3	12.9	 16
310	 16	820.3	52.2	 16
311	 16	246.8	41.8	 16
312	 16	153.8	12.3	 16
313	 16	77.3	10.8	 16
314	 16	193.5	135.9	 16
315	 16	102.5	12.6	 16
316	 16	487.8	57.6	 16
317	 16	246.3	23.8	 16
318	 16	127.3	20.1	 16
319	 16	184.5	15.5	 16
320	 16	120.8	17.0	 16
321	 16	166.3	16.1	 16
322	 16	216.5	28.8	 16
323	 16	91.3	16.4	 16
324	 16	115.5	22.9	 16
325	 16	174.5	17.3	 16
326	 16	130.8	23.7	 16
327	 16	132.8	26.4	 16
328	 16	79.3	9.8	 16
329	 16	73.3	10.5	 16
330	 16	161.0	39.2	 16
331	 16	92.5	33.0	 16
332	 16	131.5	19.9	 16
333	 16	265.8	33.7	 16
334	 16	79.0	12.5	 16
335	 16	78.3	14.6	 16
336	 16	79.5	12.7	 16
337	 16	247.5	28.0	 16
338	 16	120.8	18.4	 16
339	 16	110.0	15.5	 16
340	 16	81.0	15.6	 16
341	 16	64.3	9.3	 16
342	 16	94.5	15.6	 16
343	 16	74.3	12.7	 16
344	 16	78.0	17.4	 16
345	 16	89.3	15.8	 16
346	 16	114.3	11.7	 16
347	 16	72.3	16.1	 16
348	 16	76.8	10.8	 16
349	 16	85.0	12.1	 16
350	 16	99.8	17.4	 16
351	 16	119.0	12.8	 16
352	 16	73.3	15.9	 16
353	 16	90.0	13.1	 16
354	 16	71.3	11.9	 16
355	 16	92.0	13.6	 16
356	 16	245.8	32.7	 16
357	 16	129.8	18.7	 16
358	 16	132.3	21.2	 16
359	 16	172.0	27.0	 16
360	 16	71.0	14.9	 16
361	 16	99.3	16.2	 16
362	 16	97.8	18.6	 16
363	 16	65.5	12.2	 16
364	 16	87.0	12.7	 16
365	 16	69.5	10.0	 16
366	 16	127.5	19.0	 16
367	 16	142.3	27.9	 16
368	 16	69.0	16.2	 16
369	 16	72.0	10.8	 16
370	 16	77.0	12.8	 16
371	 16	80.5	12.0	 16
372	 16	105.0	16.5	 16
373	 16	117.5	18.6	 16
374	 16	70.0	9.0	 16
375	 16	316.5	41.4	 16
376	 16	114.8	15.6	 16
377	 16	92.0	13.2	 16
378	 16	84.0	11.1	 16
379	 16	171.3	24.6	 16
380	 16	74.5	14.3	 16
381	 16	74.3	11.5	 16
382	 16	59.5	7.3	 16
383	 16	92.5	30.4	 16
384	 16	82.3	14.2	 16
385	 16	148.5	24.6	 16
386	 16	114.3	14.7	 16
387	 16	248.5	34.4	 16
388	 16	228.0	19.6	 16
389	 16	136.5	11.3	 16
390	 16	71.8	9.4	 16
391	 16	86.3	18.4	 16
392	 16	84.0	14.2	 16
393	 16	134.8	16.3	 16
394	 16	172.8	27.6	 16
395	 16	109.5	13.3	 16
396	 16	90.5	13.8	 16
397	 16	69.3	11.1	 16
398	 16	78.5	9.6	 20
399	 16	77.5	14.5	 16
400	 16	135.8	19.3	 16
401	 16	90.0	18.1	 16
402	 16	116.0	19.4	 16
403	 16	101.0	15.9	 16
404	 16	288.3	40.1	 16
405	 16	370.8	34.0	 16
406	 16	119.0	23.7	 16
407	 16	108.5	12.3	 16
408	 16	118.0	17.6	 16
409	 16	81.5	15.5	 16
410	 16	101.5	15.7	 16
411	 16	64.3	12.6	 16
412	 16	82.3	8.8	 16
413	 16	90.3	15.6	 16
414	 16	85.8	13.3	 16
415	 16	95.3	10.9	 16
416	 16	164.8	22.4	 16
417	 16	121.3	23.1	 16
418	 16	112.3	14.0	 16
419	 16	125.3	22.5	 16
420	 16	102.5	16.3	 16
421	 16	85.0	14.8	 16
422	 16	79.0	15.0	 16
423	 16	122.8	20.5	 16
424	 16	82.0	13.4	 16
425	 16	89.0	25.5	 16
426	 16	78.0	13.0	 16
427	 16	149.0	14.4	 16
428	 16	71.3	13.9	 16
429	 16	78.0	10.4	 16
430	 16	84.0	12.0	 16
431	 16	3344.5	312.4	 16
432	 16	90.3	18.4	 16
433	 16	73.8	12.7	 16
434	 16	253.3	30.9	 16
435	 16	166.3	14.1	 16
436	 16	101.8	15.6	 16
437	 16	274.3	27.1	 16
438	 16	277.0	32.2	 16
439	 16	142.8	16.9	 16
440	 16	1590.8	304.7	 16
441	 16	398.0	38.3	 16
442	 16	79.5	32.3	 16
443	 16	83.3	10.4	 16
444	 16	153.3	26.3	 16
445	 16	379.5	33.0	 16
446	 16	201.5	29.2	 16
447	 16	201.0	32.1	 16
448	 16	187.0	23.2	 16
449	 16	154.8	12.4	 16
450	 16	163.8	20.0	 16
451	 16	425.0	52.7	 16
452	 16	131.3	22.3	 16
453	 16	210.8	26.2	 16
454	 16	164.3	16.6	 16
455	 16	89.5	19.1	 16
456	 16	64.3	9.2	 16
457	 16	86.8	11.6	 16
458	 16	156.5	16.9	 16
459	 16	86.3	11.9	 16
460	 16	128.3	48.6	 16
461	 16	123.5	19.4	 16
462	 16	106.5	12.4	 16
463	 16	74.8	12.6	 16
464	 16	84.3	13.1	 16
465	 16	93.3	17.5	 16
466	 16	79.0	11.6	 16
467	 16	83.3	13.5	 16
468	 16	118.0	19.5	 16
469	 16	158.8	18.9	 16
470	 16	169.3	14.5	 16
471	 16	127.0	15.3	 16
472	 16	113.3	17.2	 16
473	 16	81.5	11.9	 16
474	 16	108.3	20.1	 16
475	 16	158.8	20.5	 16
476	 16	72.0	15.6	 16
477	 16	125.0	21.6	 16
478	 16	246.0	29.1	 16
479	 16	139.3	16.4	 16
480	 16	76.0	13.2	 16
481	 16	114.3	16.3	 16
482	 16	87.5	16.2	 16
483	 16	68.5	8.9	 16
484	 16	90.3	15.4	 16
485	 16	69.3	10.3	 16
486	 16	90.8	13.5	 16
487	 16	93.5	19.0	 16
488	 16	93.5	15.1	 16
489	 16	78.5	8.6	 16
490	 16	93.0	11.7	 16
491	 16	72.0	9.8	 16
492	 16	122.3	14.0	 16
493	 16	200.8	28.1	 16
494	 16	68.3	8.3	 16
495	 16	75.8	10.5	 16
496	 16	82.8	13.7	 16
497	 16	61.0	11.9	 16
498	 16	70.3	12.3	 16
499	 16	74.0	11.7	 16
500	 16	71.3	9.9	 16
501	 16	209.0	23.5	 16
502	 16	74.0	14.7	 16
503	 16	114.5	14.4	 16
504	 16	73.0	11.2	 16
505	 16	106.8	18.9	 16
506	 16	80.3	11.2	 16
507	 16	107.0	16.0	 16
508	 16	115.3	12.0	 16
509	 16	119.0	16.8	 16
510	 16	122.8	28.0	 16
511	 16	79.3	11.4	 16
512	 16	81.3	17.9	 16
513	 16	92.0	10.3	 16
514	 16	101.0	17.9	 16
515	 16	73.3	12.2	 16
516	 16	106.3	19.5	 16
517	 16	73.3	10.1	 16
518	 16	68.5	12.5	 16
519	 16	64.5	9.2	 16
520	 16	76.3	12.3	 16
521	 16	60.5	8.1	 16
522	 16	86.8	15.8	 16
523	 16	99.0	16.1	 16
524	 16	72.0	11.7	 16
525	 16	132.3	28.4	 16
526	 16	89.0	12.0	 16
527	 16	193.5	19.9	 16
528	 16	80.8	18.7	 16
529	 16	70.0	11.8	 16
530	 16	187.3	27.0	 16
531	 16	300.5	21.2	 16
532	 16	63.3	7.9	 16
533	 16	67.3	14.0	 16
534	 16	92.3	15.7	 16
535	 16	157.5	18.6	 16
536	 16	90.5	13.5	 16
537	 16	137.5	19.7	 16
538	 16	289.0	30.8	 16
539	 16	146.0	19.3	 16
540	 16	269.3	42.8	 16
541	 16	78.3	10.0	 16
542	 16	92.3	14.6	 16
543	 16	74.3	13.1	 16
544	 16	124.8	12.6	 16
545	 16	103.5	13.2	 16
546	 16	69.8	10.7	 16
547	 16	151.0	38.0	 16
548	 16	124.8	14.5	 16
549	 16	68.3	14.1	 16
550	 16	73.0	9.7	 16
551	 16	68.3	7.6	 16
552	 16	83.0	13.5	 16
553	 16	104.0	17.7	 16
554	 16	382.3	91.4	 16
555	 16	133.8	17.1	 16
556	 16	483.3	97.1	 16
557	 16	155.5	23.7	 16
558	 16	83.5	17.3	 16
559	 16	77.5	12.1	 16
560	 16	70.0	8.0	 16
561	 16	87.5	15.3	 16
562	 16	124.3	26.5	 16
563	 16	89.5	17.2	 16
564	 16	81.3	15.4	 16
565	 16	98.8	13.4	 16
566	 16	74.8	16.0	 16
567	 16	187.0	37.3	 16
568	 16	215.3	95.7	 16
569	 16	171.5	17.9	 16
570	 16	198.0	30.5	 16
571	 16	82.8	15.6	 16
572	 16	96.3	19.9	 16
573	 16	112.0	21.4	 16
574	 16	67.3	48.4	 16
575	 16	67.3	9.3	 16
576	 16	86.3	11.9	 20
577	 16	216.3	25.6	 16
578	 16	67.3	11.9	 16
579	 16	92.0	17.1	 16
580	 16	172.5	21.7	 16
581	 16	125.8	16.1	 16
582	 16	92.3	13.4	 16
583	 16	98.3	13.3	 16
584	 16	102.0	12.8	 16
585	 16	127.0	17.2	 16
586	 16	139.5	17.6	 16
587	 16	117.5	16.9	 16
588	 16	112.0	19.1	 16
589	 16	76.5	9.0	 16
590	 16	73.3	13.9	 16
591	 16	78.5	11.7	 16
592	 16	81.8	8.9	 16
593	 16	132.5	15.3	 16
594	 16	113.3	16.4	 16
595	 16	252.8	23.7	 16
596	 16	117.3	17.2	 16
597	 16	96.5	18.0	 16
598	 16	78.3	10.9	 16
599	 16	119.8	25.3	 16
600	 16	166.0	23.9	 16
601	 16	158.5	23.5	 16
602	 16	120.3	16.0	 16
603	 16	65.0	15.0	 16
604	 16	77.8	14.9	 16
605	 16	147.3	33.1	 16
606	 16	84.3	14.5	 16
607	 16	83.3	11.8	 16
608	 16	98.3	13.8	 16
609	 16	116.3	16.7	 16
610	 16	72.3	13.4	 16
611	 16	73.5	10.3	 16
612	 16	77.0	17.8	 16
613	 16	114.0	22.0	 16
614	 16	87.3	11.4	 16
615	 16	83.5	15.8	 16
616	 16	90.0	12.0	 16
617	 16	214.3	25.6	 16
618	 16	76.5	11.2	 16
619	 16	150.3	20.9	 16
620	 16	142.3	17.8	 16
621	 16	73.3	10.7	 16
622	 16	385.3	43.2	 16
623	 16	582.8	52.4	 16
624	 16	91.3	16.0	 16
625	 16	174.5	25.7	 16
626	 16	105.0	12.7	 16
627	 16	90.3	12.0	 16
628	 16	130.3	18.0	 16
629	 16	107.3	11.0	 16
630	 16	186.3	28.1	 16
631	 16	131.0	23.5	 16
632	 16	113.5	12.7	 16
633	 16	179.5	29.5	 16
634	 16	177.5	20.1	 16
635	 16	205.0	25.0	 16
636	 16	127.0	20.3	 16
637	 16	91.3	10.7	 16
638	 16	175.5	24.9	 16
639	 16	90.0	15.8	 16
640	 16	99.3	19.8	 16
641	 16	269.5	32.6	 16
642	 16	181.5	31.7	 16
643	 16	74.3	15.3	 16
644	 16	117.0	18.1	 16
645	 16	89.5	11.0	 16
646	 16	89.8	13.5	 16
647	 16	91.0	12.1	 16
648	 16	104.3	14.8	 16
649	 16	72.3	9.5	 16
650	 16	68.8	14.2	 16
651	 16	66.0	16.1	 16
652	 16	86.8	11.2	 16
653	 16	145.8	19.5	 16
654	 16	84.3	14.7	 16
655	 16	71.8	12.0	 16
656	 16	266.5	57.0	 16
657	 16	108.5	17.1	 16
658	 16	98.5	15.0	 16
659	 16	75.8	12.8	 16
660	 16	165.3	26.3	 16
661	 16	94.3	17.3	 16
662	 16	431.8	81.7	 16
663	 16	106.5	18.9	 16
664	 16	110.8	13.2	 16
665	 16	195.8	22.4	 16
666	 16	66.0	7.2	 16
667	 16	74.3	18.3	 16
668	 16	64.8	11.4	 16
669	 16	71.5	27.8	 16
670	 16	60.3	8.5	 16
671	 16	109.3	15.8	 16
672	 16	96.8	14.2	 16
673	 16	75.0	11.7	 16
674	 16	177.3	28.9	 12
675	 16	531.8	98.1	 16
676	 16	98.3	33.1	 16
677	 16	81.5	14.3	 16
678	 16	102.3	16.9	 16
679	 16	102.0	17.9	 16
680	 16	77.8	15.6	 16
681	 16	71.0	11.3	 16
682	 16	58.5	6.6	 16
683	 16	110.3	18.4	 16
684	 16	79.0	13.0	 16
685	 16	100.3	15.3	 16
686	 16	116.8	20.2	 16
687	 16	134.5	23.5	 16
688	 16	64.0	10.9	 16
689	 16	64.0	13.6	 16
690	 16	82.3	16.1	 16
691	 16	88.8	14.8	 16
692	 16	369.8	69.8	 16
693	 16	69.3	16.1	 16
694	 16	134.5	19.9	 16
695	 16	74.3	14.5	 16
696	 16	84.8	10.5	 16
697	 16	95.3	16.2	 16
698	 16	82.5	8.8	 16
699	 16	69.3	9.8	 16
700	 16	89.0	12.0	 16
701	 16	121.0	21.6	 16
702	 16	353.3	32.0	 16
703	 16	93.8	18.0	 16
704	 16	315.8	43.7	 16
705	 16	320.3	26.5	 16
706	 16	146.5	19.3	 16
707	 16	100.8	11.9	 16
708	 16	101.8	15.3	 16
709	 16	66.3	15.9	 16
710	 16	192.3	44.6	 16
711	 16	327.3	94.4	 16
  0	 17	123.0	19.6	 16
  1	 17	112.5	18.4	 16
  2	 17	78.3	13.9	 16
  3	 17	645.3	94.5	 16
  4	 17	149.0	18.6	 16
  5	 17	173.5	27.1	 16
  6	 17	108.0	23.6	 16
  7	 17	99.8	18.2	 16
  8	 17	209.0	24.4	 16
  9	 17	167.0	28.3	 16
 10	 17	74.8	15.2	 16
 11	 17	69.5	11.9	 16
 12	 17	106.5	21.1	 16
 13	 17	77.0	10.6	 16
 14	 17	101.8	17.4	 16
 15	 17	84.0	16.6	 16
 16	 17	204.5	36.5	 16
 17	 17	100.5	13.2	 16
 18	 17	682.0	63.4	 16
 19	 17	109.5	18.9	 16
 20	 17	191.0	38.6	 16
 21	 17	105.5	14.1	 16
 22	 17	101.8	14.6	 16
 23	 17	72.5	10.6	 16
 24	 17	181.0	20.9	 16
 25	 17	93.3	14.9	 16
 26	 17	96.3	12.2	 16
 27	 17	70.3	14.3	 16
 28	 17	381.5	48.6	 16
 29	 17	73.8	15.4	 16
 30	 17	70.8	16.2	 16
 31	 17	76.3	10.3	 16
 32	 17	63.5	9.6	 16
 33	 17	70.3	15.9	 16
 34	 17	172.0	26.6	 16
 35	 17	193.5	24.8	 16
 36	 17	75.8	11.1	 16
 37	 17	155.0	22.1	 16
 38	 17	96.5	15.9	 16
 39	 17	322.8	48.6	 16
 40	 17	84.3	14.2	 16
 41	 17	80.5	22.1	 16
 42	 17	77.8	11.3	 16
 43	 17	81.3	13.6	 16
 44	 17	328.3	35.9	 16
 45	 17	376.5	64.6	 16
 46	 17	212.8	20.8	 16
 47	 17	227.5	35.6	 16
 48	 17	119.8	16.0	 16
 49	 17	97.0	17.5	 16
 50	 17	166.0	26.5	 16
 51	 17	152.0	24.6	 16
 52	 17	130.5	21.0	 16
 53	 17	75.8	29.8	 16
 54	 17	81.0	9.1	 16
 55	 17	80.8	12.5	 16
 56	 17	1503.5	142.0	 16
 57	 17	159.5	22.5	 16
 58	 17	72.3	10.2	 16
 59	 17	107.8	16.6	 16
 60	 17	142.0	19.3	 16
 61	 17	239.0	34.1	 20
 62	 17	100.3	17.1	 16
 63	 17	1020.3	223.4	 16
 64	 17	182.3	29.0	 16
 65	 17	96.3	13.5	 16
 66	 17	91.0	17.3	 16
 67	 17	260.5	29.1	 16
 68	 17	344.0	49.6	 16
 69	 17	499.0	40.2	 16
 70	 17	500.8	57.3	 16
 71	 17	308.0	40.0	 16
 72	 17	184.5	24.7	 16
 73	 17	81.3	16.0	 16
 74	 17	233.8	29.1	 16
 75	 17	159.5	28.0	 16
 76	 17	2054.5	379.2	 16
 77	 17	114.8	21.2	 16
 78	 17	603.0	115.9	 16
 79	 17	108.3	17.2	 16
 80	 17	130.0	19.3	 16
 81	 17	72.5	11.2	 16
 82	 17	88.3	16.6	 16
 83	 17	386.0	56.0	 16
 84	 17	70.0	9.7	 16
 85	 17	69.8	13.3	 16
 86	 17	77.0	12.9	 16
 87	 17	105.3	14.8	 16
 88	 17	281.8	32.2	 16
 89	 17	893.5	116.2	 16
 90	 17	148.8	19.1	 16
 91	 17	312.5	24.0	 16
 92	 17	178.5	26.8	 16
 93	 17	170.3	23.2	 16
 94	 17	78.0	12.1	 16
 95	 17	161.0	18.5	 16
 96	 17	446.3	52.2	 16
 97	 17	2151.0	255.8	 16
 98	 17	122.5	15.6	 16
 99	 17	502.8	121.6	 16
100	 17	1209.5	112.5	 16
101	 17	213.0	29.6	 16
102	 17	103.8	11.3	 16
103	 17	87.5	12.7	 16
104	 17	91.8	15.9	 16
105	 17	276.8	48.6	 16
106	 17	82.0	12.5	 16
107	 17	66.5	11.2	 16
108	 17	114.5	14.5	 16
109	 17	154.8	20.0	 16
110	 17	630.3	88.3	 16
111	 17	182.3	29.2	 16
112	 17	132.0	14.7	 16
113	 17	361.5	55.8	 16
114	 17	100.0	15.7	 16
115	 17	338.3	31.6	 16
116	 17	164.0	16.2	 16
117	 17	173.3	22.3	 16
118	 17	193.0	27.3	 16
119	 17	199.5	27.5	 16
120	 17	91.0	11.8	 16
121	 17	72.5	15.0	 16
122	 17	144.8	18.6	 16
123	 17	86.8	13.5	 16
124	 17	217.3	34.5	 16
125	 17	126.8	17.0	 16
126	 17	183.5	31.5	 16
127	 17	123.8	19.8	 16
128	 17	86.0	12.1	 16
129	 17	196.3	28.0	 16
130	 17	87.8	15.1	 16
131	 17	202.0	19.7	 16
132	 17	141.5	26.9	 16
133	 17	107.5	17.9	 16
134	 17	113.8	15.3	 16
135	 17	106.3	18.3	 16
136	 17	122.8	19.2	 16
137	 17	209.0	21.0	 16
138	 17	82.3	10.3	 16
139	 17	100.5	15.2	 16
140	 17	151.3	19.6	 16
141	 17	89.0	18.2	 16
142	 17	654.5	69.2	 16
143	 17	158.3	20.8	 16
144	 17	95.8	17.4	 16
145	 17	73.3	11.6	 16
146	 17	121.3	20.1	 16
147	 17	73.8	11.9	 16
148	 17	159.5	15.9	 16
149	 17	89.3	14.0	 16
150	 17	80.8	14.0	 16
151	 17	71.5	8.1	 16
152	 17	157.5	63.6	 16
153	 17	99.0	20.1	 16
154	 17	198.3	25.4	 16
155	 17	85.3	11.6	 16
156	 17	83.3	13.9	 16
157	 17	818.8	91.6	 16
158	 17	150.5	22.5	 16
159	 17	377.8	44.5	 16
160	 17	163.0	20.1	 16
161	 17	175.3	22.2	 16
162	 17	163.3	18.9	 16
163	 17	103.5	14.0	 16
164	 17	116.3	17.4	 16
165	 17	76.5	9.2	 16
166	 17	93.0	13.9	 16
167	 17	88.3	15.0	 16
168	 17	305.8	42.6	 16
169	 17	206.3	28.7	 16
170	 17	599.3	77.6	 16
171	 17	139.0	27.5	 16
172	 17	366.3	35.0	 16
173	 17	205.5	34.5	 16
174	 17	204.0	25.6	 16
175	 17	184.3	27.8	 16
176	 17	420.0	31.4	 16
177	 17	360.3	53.5	 16
178	 17	590.5	51.6	 16
179	 17	271.3	27.1	 16
180	 17	191.0	29.5	 16
181	 17	104.3	20.8	 16
182	 17	136.8	17.9	 16
183	 17	105.8	10.1	 16
184	 17	82.3	15.9	 16
185	 17	78.3	12.7	 16
186	 17	204.5	28.7	 16
187	 17	1595.8	260.7	 16
188	 17	77.8	13.4	 16
189	 17	121.5	20.8	 16
190	 17	87.5	14.2	 16
191	 17	159.8	21.6	 16
192	 17	88.0	14.2	 16
193	 17	194.5	18.8	 16
194	 17	2116.8	138.8	 16
195	 17	152.3	28.8	 16
196	 17	97.0	31.1	 16
197	 17	69.0	14.4	 16
198	 17	353.0	35.7	 16
199	 17	295.0	37.0	 16
200	 17	343.3	54.5	 16
201	 17	79.0	13.3	 16
202	 17	233.5	32.2	 16
203	 17	190.5	38.0	 16
204	 17	87.5	11.3	 16
205	 17	75.0	9.9	 16
206	 17	92.5	14.2	 16
207	 17	106.5	11.2	 16
208	 17	95.3	11.1	 16
209	 17	73.5	13.6	 16
210	 17	180.5	32.4	 16
211	 17	70.5	15.4	 16
212	 17	454.0	57.0	 16
213	 17	138.0	23.2	 16
214	 17	128.3	22.6	 16
215	 17	65.8	13.3	 16
216	 17	100.0	19.4	 16
217	 17	218.8	29.7	 16
218	 17	75.3	10.7	 16
219	 17	71.0	9.0	 16
220	 17	122.5	18.3	 16
221	 17	70.0	12.3	 16
222	 17	94.3	14.8	 16
223	 17	61.8	10.0	 16
224	 17	117.3	28.6	 16
225	 17	70.5	11.8	 16
226	 17	79.3	12.8	 16
227	 17	70.0	12.4	 16
228	 17	272.3	42.6	 16
229	 17	287.0	35.1	 16
230	 17	90.8	15.4	 16
231	 17	398.3	50.0	 16
232	 17	205.3	27.3	 16
233	 17	1907.8	231.7	 16
234	 17	403.5	34.2	 16
235	 17	172.3	19.8	 16
236	 17	77.3	11.3	 16
237	 17	163.8	16.6	 16
238	 17	68.3	9.1	 16
239	 17	175.8	23.4	 20
240	 17	80.8	9.6	 16
241	 17	275.3	42.7	 16
242	 17	188.3	21.7	 16
243	 17	380.5	61.4	 16
244	 17	88.3	13.3	 16
245	 17	537.0	96.7	 16
246	 17	137.8	23.5	 16
247	 17	114.3	25.5	 16
248	 17	92.5	17.2	 16
249	 17	141.8	20.5	 16
250	 17	358.0	38.5	 16
251	 17	417.3	59.3	 16
252	 17	109.0	26.4	 16
253	 17	579.3	91.4	 16
254	 17	130.0	24.5	 16
255	 17	65.8	11.2	 16
256	 17	124.5	15.8	 16
257	 17	122.8	16.7	 16
258	 17	241.0	28.1	 16
259	 17	139.5	18.3	 16
260	 17	156.3	23.8	 16
261	 17	426.5	28.7	 16
262	 17	148.8	20.8	 16
263	 17	107.3	11.5	 16
264	 17	98.5	16.6	 16
265	 17	97.8	10.3	 16
266	 17	112.3	17.7	 16
267	 17	77.3	13.3	 16
268	 17	131.0	15.0	 16
269	 17	392.0	67.2	 16
270	 17	219.8	27.7	 16
271	 17	222.5	45.9	 16
272	 17	270.5	31.0	 16
273	 17	120.3	23.3	 16
274	 17	85.0	11.7	 16
275	 17	454.8	52.6	 16
276	 17	124.0	21.7	 16
277	 17	251.8	24.6	 16
278	 17	154.3	17.9	 16
279	 17	153.0	17.2	 16
280	 17	74.3	11.3	 16
281	 17	77.8	11.5	 16
282	 17	122.5	15.1	 16
283	 17	78.8	10.5	 16
284	 17	90.8	14.3	 16
285	 17	75.0	13.0	 16
286	 17	88.0	20.6	 16
287	 17	124.0	19.5	 16
288	 17	100.3	14.7	 16
289	 17	80.0	14.6	 16
290	 17	177.8	26.7	 16
291	 17	114.3	22.2	 16
292	 17	111.8	16.4	 16
293	 17	83.8	11.5	 16
294	 17	71.8	10.9	 16
295	 17	112.3	14.0	 16
296	 17	79.3	9.5	 16
297	 17	74.0	10.8	 16
298	 17	119.3	15.0	 16
299	 17	83.3	11.3	 16
300	 17	230.3	28.4	 16
301	 17	130.0	14.9	 16
302	 17	357.0	46.0	 16
303	 17	229.0	22.5	 16
304	 17	119.3	14.9	 16
305	 17	283.3	30.1	 16
306	 17	256.3	31.8	 16
307	 17	6050.5	423.2	 16
308	 17	6761.3	160.6	 16
309	 17	6770.8	474.1	 16
310	 17	154.3	21.3	 16
311	 17	98.0	15.0	 16
312	 17	125.5	22.8	 16
313	 17	187.3	22.1	 16
314	 17	137.5	20.2	 16
315	 17	135.3	17.9	 16
316	 17	635.5	42.2	 16
317	 17	105.3	16.8	 16
318	 17	153.3	19.1	 16
319	 17	94.5	25.6	 16
320	 17	127.5	7.8	 16
321	 17	106.0	16.0	 16
322	 17	135.5	21.4	 16
323	 17	96.0	15.0	 16
324	 17	88.5	11.0	 16
325	 17	66.3	12.3	 16
326	 17	67.8	11.6	 16
327	 17	110.3	15.6	 16
328	 17	80.0	12.2	 16
329	 17	77.0	10.6	 16
330	 17	332.8	37.5	 16
331	 17	139.0	17.8	 16
332	 17	401.5	39.6	 16
333	 17	237.5	24.6	 16
334	 17	93.0	17.3	 16
335	 17	562.8	50.6	 16
336	 17	187.3	29.6	 16
337	 17	110.8	16.2	 16
338	 17	215.5	25.8	 16
339	 17	1989.0	186.9	 16
340	 17	84.5	16.2	 16
341	 17	74.5	11.5	 16
342	 17	275.8	32.8	 16
343	 17	118.0	18.5	 16
344	 17	157.5	18.5	 16
345	 17	157.0	19.9	 16
346	 17	188.3	28.2	 16
347	 17	116.5	20.8	 16
348	 17	196.3	29.0	 16
349	 17	118.3	12.9	 16
350	 17	72.3	9.4	 16
351	 17	114.8	20.6	 16
352	 17	1690.0	140.8	 16
353	 17	70.3	7.6	 16
354	 17	142.0	19.9	 16
355	 17	109.3	17.8	 16
356	 17	261.0	38.9	 16
357	 17	119.5	20.3	 16
358	 17	147.0	15.8	 16
359	 17	95.3	14.7	 16
360	 17	103.0	17.9	 16
361	 17	118.8	27.2	 16
362	 17	141.3	21.9	 16
363	 17	118.0	15.9	 16
364	 17	111.0	12.9	 16
365	 17	332.5	43.8	 16
366	 17	255.8	38.6	 16
367	 17	72.5	9.0	 16
368	 17	73.0	13.0	 16
369	 17	424.3	51.8	 16
370	 17	96.5	17.9	 16
371	 17	73.3	18.1	 16
372	 17	90.8	13.7	 16
373	 17	95.0	13.2	 16
374	 17	87.5	15.9	 16
375	 17	111.3	14.5	 16
376	 17	346.5	46.0	 16
377	 17	126.8	21.8	 16
378	 17	115.5	22.8	 16
379	 17	67.3	9.8	 16
380	 17	84.5	16.8	 16
381	 17	114.5	18.0	 16
382	 17	74.5	13.1	 16
383	 17	139.3	15.7	 16
384	 17	136.0	26.5	 16
385	 17	487.8	50.2	 16
386	 17	171.5	32.1	 16
387	 17	333.0	53.7	 16
388	 17	64.8	10.1	 16
389	 17	129.0	26.1	 16
390	 17	82.0	15.1	 16
391	 17	113.5	16.0	 16
392	 17	101.5	15.1	 16
393	 17	92.5	10.8	 16
394	 17	109.8	17.6	 16
395	 17	228.3	42.7	 16
396	 17	103.3	15.6	 16
397	 17	75.5	14.1	 16
398	 17	96.8	18.6	 16
399	 17	169.0	35.2	 16
400	 17	107.5	12.3	 16
401	 17	80.8	10.0	 16
402	 17	155.0	21.9	 16
403	 17	118.0	26.5	 16
404	 17	143.3	21.9	 16
405	 17	91.3	15.2	 16
406	 17	98.5	14.0	 16
407	 17	403.0	81.2	 16
408	 17	83.0	14.8	 16
409	 17	67.5	13.4	 16
410	 17	69.0	12.8	 16
411	 17	99.8	19.6	 16
412	 17	115.8	23.5	 16
413	 17	102.8	15.6	 16
414	 17	164.5	27.1	 16
415	 17	140.3	19.1	 16
416	 17	66.0	9.6	 16
417	 17	76.8	12.3	 20
418	 17	496.5	55.1	 16
419	 17	74.3	15.0	 16
420	 17	426.3	47.3	 16
421	 17	122.3	12.8	 16
422	 17	128.8	15.8	 16
423	 17	121.3	18.2	 16
424	 17	136.3	16.0	 16
425	 17	150.0	21.3	 16
426	 17	294.3	24.5	 16
427	 17	173.5	24.8	 16
428	 17	75.3	14.6	 16
429	 17	65.5	11.2	 16
430	 17	245.0	31.7	 16
431	 17	212.5	24.0	 16
432	 17	174.8	31.5	 16
433	 17	79.8	14.3	 16
434	 17	230.3	66.8	 16
435	 17	94.8	14.9	 16
436	 17	144.5	16.5	 16
437	 17	163.5	19.9	 16
438	 17	201.0	27.0	 16
439	 17	89.8	13.5	 16
440	 17	295.0	36.7	 16
441	 17	301.8	44.6	 16
442	 17	201.0	24.1	 16
443	 17	225.0	23.3	 16
444	 17	237.8	46.5	 16
445	 17	116.0	15.7	 16
446	 17	107.5	16.5	 16
447	 17	123.5	16.8	 16
448	 17	100.3	17.0	 16
449	 17	95.5	17.1	 16
450	 17	137.3	20.5	 16
451	 17	122.8	14.1	 16
452	 17	352.8	29.4	 16
453	 17	118.0	15.8	 16
454	 17	88.5	15.2	 16
455	 17	134.0	17.7	 16
456	 17	138.3	31.0	 16
457	 17	85.0	17.0	 16
458	 17	76.0	13.1	 16
459	 17	125.3	23.7	 16
460	 17	249.3	31.1	 16
461	 17	80.8	10.5	 16
462	 17	126.0	19.9	 16
463	 17	120.8	21.0	 16
464	 17	1133.0	226.7	 16
465	 17	286.5	34.5	 16
466	 17	70.5	9.7	 16
467	 17	182.3	28.2	 16
468	 17	109.0	16.5	 16
469	 17	85.8	13.3	 16
470	 17	154.8	23.6	 16
471	 17	78.3	13.8	 16
472	 17	115.0	14.5	 16
473	 17	60.0	14.6	 16
474	 17	152.5	26.2	 16
475	 17	290.8	27.3	 16
476	 17	110.5	13.9	 16
477	 17	74.8	11.8	 16
478	 17	224.0	32.5	 16
479	 17	444.5	43.7	 16
480	 17	158.3	25.2	 16
481	 17	98.3	22.0	 16
482	 17	321.3	45.3	 16
483	 17	344.3	30.6	 16
484	 17	102.0	12.3	 16
485	 17	217.0	26.2	 16
486	 17	100.0	16.1	 16
487	 17	190.3	20.4	 16
488	 17	77.0	17.4	 16
489	 17	83.5	12.6	 16
490	 17	78.5	14.2	 16
491	 17	124.0	14.9	 16
492	 17	74.3	14.6	 16
493	 17	178.0	20.7	 16
494	 17	426.0	50.0	 16
495	 17	286.5	37.7	 16
496	 17	162.8	24.6	 16
497	 17	161.8	35.9	 16
498	 17	171.5	26.7	 16
499	 17	84.0	12.2	 16
500	 17	111.8	17.2	 16
501	 17	309.0	37.8	 16
502	 17	125.5	30.4	 16
503	 17	154.8	20.9	 16
504	 17	93.5	17.0	 16
505	 17	80.0	12.3	 16
506	 17	72.5	14.5	 16
507	 17	67.5	12.9	 16
508	 17	72.8	9.8	 16
509	 17	76.3	12.7	 16
510	 17	195.3	14.2	 16
511	 17	199.5	28.7	 16
512	 17	66.0	10.6	 16
513	 17	75.5	11.9	 16
514	 17	76.0	15.1	 16
515	 17	185.5	21.0	 16
516	 17	120.8	16.5	 16
517	 17	110.8	19.6	 16
518	 17	135.3	20.5	 16
519	 17	85.5	12.8	 16
520	 17	84.5	13.2	 16
521	 17	85.8	20.0	 16
522	 17	92.0	16.1	 16
523	 17	181.5	22.3	 16
524	 17	98.5	14.3	 16
525	 17	102.3	14.4	 16
526	 17	272.3	39.5	 16
527	 17	95.5	16.6	 16
528	 17	149.0	21.8	 16
529	 17	111.8	18.0	 16
530	 17	125.0	11.9	 16
531	 17	208.5	25.9	 16
532	 17	88.5	20.2	 16
533	 17	93.5	20.8	 16
534	 17	212.5	33.8	 16
535	 17	67.8	12.3	 16
536	 17	79.0	15.3	 16
537	 17	76.0	11.5	 16
538	 17	81.3	10.8	 16
539	 17	84.8	13.7	 16
540	 17	124.0	20.0	 16
541	 17	138.0	21.9	 16
542	 17	201.8	26.0	 16
543	 17	134.5	22.8	 16
544	 17	108.3	13.4	 16
545	 17	106.0	16.7	 16
546	 17	93.5	20.2	 16
547	 17	98.0	17.7	 16
548	 17	116.8	15.6	 16
549	 17	120.3	21.0	 16
550	 17	183.5	32.5	 16
551	 17	241.8	41.0	 16
552	 17	570.8	95.3	 16
553	 17	373.8	62.3	 16
554	 17	346.0	49.2	 16
555	 17	360.3	62.7	 16
556	 17	125.3	18.8	 16
557	 17	82.5	14.9	 16
558	 17	165.3	25.9	 16
559	 17	846.3	118.0	 16
560	 17	122.3	21.8	 16
561	 17	74.5	10.3	 16
562	 17	81.5	14.1	 16
563	 17	151.0	16.9	 16
564	 17	1185.8	292.3	 16
565	 17	114.0	22.3	 16
566	 17	80.0	8.4	 16
567	 17	115.3	20.7	 16
568	 17	91.3	16.8	 16
569	 17	312.3	64.9	 16
570	 17	71.3	12.2	 16
571	 17	101.8	32.8	 16
572	 17	80.3	16.8	 16
573	 17	180.3	39.5	 16
574	 17	130.3	19.7	 16
575	 17	449.3	96.3	 16
576	 17	400.0	77.8	 16
577	 17	101.0	23.0	 16
578	 17	90.8	16.9	 16
579	 17	185.0	35.5	 16
580	 17	664.5	159.6	 16
581	 17	223.0	69.5	 16
582	 17	230.3	29.2	 16
583	 17	110.5	12.6	 16
584	 17	1116.3	338.3	 16
585	 17	337.3	40.9	 16
586	 17	119.5	19.7	 16
587	 17	109.5	15.7	 16
588	 17	85.0	13.6	 16
589	 17	120.8	20.5	 16
590	 17	266.0	74.9	 16
591	 17	98.3	14.2	 16
592	 17	76.3	13.4	 16
593	 17	650.3	189.9	 16
594	 17	112.8	19.4	 16
595	 17	108.0	13.9	 20
596	 17	279.0	32.8	 16
597	 17	373.0	51.8	 16
598	 17	95.0	20.0	 16
599	 17	115.8	28.9	 16
600	 17	169.5	25.0	 16
601	 17	341.5	14.1	 16
602	 17	934.5	92.3	 16
603	 17	136.3	18.5	 16
604	 17	220.8	30.8	 16
605	 17	133.3	19.6	 16
606	 17	114.5	16.3	 16
607	 17	96.3	12.9	 12
608	 17	162.8	20.3	 16
609	 17	105.5	43.0	 16
610	 17	122.3	16.9	 16
611	 17	184.0	24.8	 16
612	 17	67.3	11.3	 16
613	 17	65.0	10.8	 16
614	 17	88.0	15.7	 16
615	 17	404.5	68.9	 16
616	 17	103.8	17.7	 16
617	 17	169.8	22.2	 16
618	 17	298.8	29.9	 16
619	 17	317.5	34.9	 16
620	 17	138.0	18.1	 16
621	 17	244.3	42.7	 16
622	 17	284.8	35.0	 16
623	 17	207.8	34.1	 16
624	 17	147.5	17.7	 16
625	 17	180.8	21.1	 16
626	 17	78.3	11.6	 16
627	 17	127.8	18.9	 16
628	 17	126.0	15.1	 16
629	 17	197.3	28.7	 16
630	 17	112.5	12.4	 16
631	 17	89.3	22.7	 16
632	 17	70.0	7.6	 16
633	 17	138.5	22.0	 16
634	 17	144.3	14.3	 16
635	 17	190.3	25.0	 16
636	 17	64.8	13.2	 16
637	 17	78.0	9.1	 16
638	 17	104.8	18.9	 16
639	 17	418.5	44.2	 16
640	 17	156.0	26.7	 16
641	 17	159.5	18.5	 16
642	 17	326.0	38.1	 16
643	 17	207.3	17.7	 16
644	 17	66.8	10.3	 16
645	 17	436.0	64.5	 16
646	 17	183.3	30.7	 16
647	 17	168.5	26.0	 16
648	 17	179.0	19.6	 16
649	 17	169.3	17.8	 16
650	 17	132.8	17.2	 16
651	 17	85.5	12.0	 16
652	 17	113.8	19.2	 16
653	 17	142.3	16.9	 16
654	 17	190.3	32.4	 16
655	 17	89.0	12.9	 16
656	 17	67.0	11.7	 16
657	 17	98.0	16.5	 16
658	 17	73.0	11.4	 16
659	 17	243.3	28.8	 16
660	 17	101.3	13.8	 16
661	 17	140.8	19.9	 16
662	 17	161.3	26.4	 16
663	 17	135.8	21.6	 16
664	 17	78.5	19.5	 16
665	 17	73.3	11.7	 16
666	 17	287.5	40.3	 16
667	 17	193.3	30.5	 16
668	 17	67.5	9.3	 16
669	 17	79.0	16.7	 16
670	 17	69.5	12.5	 16
671	 17	1126.3	129.6	 16
672	 17	1201.5	125.0	 16
673	 17	73.0	9.5	 16
674	 17	166.5	21.5	 16
675	 17	230.5	33.2	 16
676	 17	150.5	21.1	 16
677	 17	274.0	42.0	 16
678	 17	108.0	19.7	 16
679	 17	111.3	14.9	 16
680	 17	133.8	18.9	 16
681	 17	125.0	18.3	 16
682	 17	104.0	19.7	 16
683	 17	100.3	17.6	 16
684	 17	162.3	23.4	 16
685	 17	187.0	29.2	 16
686	 17	111.0	22.5	 16
687	 17	174.5	18.4	 16
688	 17	236.5	27.0	 16
689	 17	90.8	15.5	 16
690	 17	98.3	11.5	 16
691	 17	160.3	18.7	 16
692	 17	155.5	25.7	 16
693	 17	152.5	19.2	 16
694	 17	228.3	40.3	 16
695	 17	89.5	12.6	 16
696	 17	113.3	16.2	 16
697	 17	166.5	20.7	 16
698	 17	248.5	37.4	 16
699	 17	90.8	14.2	 16
700	 17	98.0	11.4	 16
701	 17	94.0	14.2	 16
702	 17	169.3	26.7	 16
703	 17	147.3	22.7	 16
704	 17	133.0	22.5	 16
705	 17	113.0	22.2	 16
706	 17	106.3	17.5	 16
707	 17	117.3	11.4	 16
708	 17	116.5	19.0	 16
709	 17	113.3	17.4	 16
710	 17	100.3	15.1	 16
711	 17	140.5	17.1	 16
  0	 18	7916.8	942.5	 16
  1	 18	111.0	19.9	 16
  2	 18	80.0	13.8	 16
  3	 18	145.5	26.2	 16
  4	 18	101.8	24.6	 16
  5	 18	151.5	21.3	 16
  6	 18	114.8	16.7	 16
  7	 18	129.8	37.8	 16
  8	 18	110.0	15.1	 16
  9	 18	74.5	11.3	 16
 10	 18	74.3	13.5	 16
 11	 18	79.5	12.2	 16
 12	 18	100.5	15.6	 16
 13	 18	98.3	18.9	 16
 14	 18	82.0	13.8	 16
 15	 18	74.0	12.2	 16
 16	 18	201.8	28.2	 16
 17	 18	81.0	8.6	 16
 18	 18	166.5	30.6	 16
 19	 18	119.5	15.3	 16
 20	 18	105.5	18.4	 16
 21	 18	117.0	22.8	 16
 22	 18	88.3	14.5	 16
 23	 18	79.0	14.6	 16
 24	 18	127.0	13.5	 16
 25	 18	89.0	15.4	 16
 26	 18	94.0	15.5	 16
 27	 18	59.8	10.5	 16
 28	 18	82.8	11.8	 16
 29	 18	68.3	42.0	 16
 30	 18	84.5	17.3	 16
 31	 18	69.3	11.1	 16
 32	 18	84.3	14.5	 16
 33	 18	70.8	13.4	 16
 34	 18	105.0	19.0	 16
 35	 18	175.3	19.4	 16
 36	 18	95.0	11.6	 16
 37	 18	110.5	19.1	 16
 38	 18	98.8	15.3	 16
 39	 18	105.8	14.3	 16
 40	 18	85.0	13.4	 16
 41	 18	89.5	18.5	 16
 42	 18	67.0	9.6	 16
 43	 18	98.3	22.4	 16
 44	 18	151.0	21.3	 16
 45	 18	215.5	31.7	 16
 46	 18	116.5	14.4	 16
 47	 18	109.5	24.4	 16
 48	 18	95.5	18.3	 16
 49	 18	78.3	10.7	 16
 50	 18	87.3	16.9	 16
 51	 18	133.3	22.2	 16
 52	 18	104.8	14.2	 16
 53	 18	75.3	12.1	 16
 54	 18	77.5	15.4	 16
 55	 18	95.0	16.7	 16
 56	 18	119.0	16.7	 16
 57	 18	68.0	14.0	 16
 58	 18	72.0	8.1	 16
 59	 18	72.3	12.5	 16
 60	 18	103.0	18.9	 16
 61	 18	104.5	18.2	 16
 62	 18	87.5	12.2	 16
 63	 18	227.5	46.9	 16
 64	 18	119.0	18.4	 16
 65	 18	85.0	11.3	 16
 66	 18	100.8	10.9	 16
 67	 18	94.0	15.3	 16
 68	 18	78.5	10.3	 16
 69	 18	268.3	29.2	 16
 70	 18	304.0	36.8	 16
 71	 18	149.0	30.8	 16
 72	 18	130.0	20.8	 16
 73	 18	101.5	20.4	 16
 74	 18	137.5	13.2	 16
 75	 18	79.5	9.9	 16
 76	 18	168.0	24.3	 16
 77	 18	92.5	13.1	 16
 78	 18	158.0	27.4	 16
 79	 18	128.0	16.2	 20
 80	 18	92.0	16.9	 16
 81	 18	86.3	15.6	 16
 82	 18	78.8	17.4	 16
 83	 18	87.5	12.8	 16
 84	 18	75.3	13.2	 16
 85	 18	87.5	13.8	 16
 86	 18	69.3	8.0	 16
 87	 18	106.0	18.1	 16
 88	 18	152.0	27.9	 16
 89	 18	212.3	29.9	 16
 90	 18	105.3	11.9	 16
 91	 18	242.8	41.0	 16
 92	 18	194.0	25.8	 16
 93	 18	174.0	32.5	 16
 94	 18	69.3	14.5	 16
 95	 18	152.3	36.4	 16
 96	 18	280.3	22.3	 16
 97	 18	224.0	35.0	 16
 98	 18	110.0	17.1	 16
 99	 18	180.8	25.3	 16
100	 18	238.3	32.2	 16
101	 18	153.8	20.7	 16
102	 18	127.8	20.7	 16
103	 18	91.8	19.9	 16
104	 18	87.3	12.6	 16
105	 18	140.3	17.6	 16
106	 18	76.3	14.4	 16
107	 18	71.8	13.8	 16
108	 18	98.0	15.2	 16
109	 18	115.0	18.2	 16
110	 18	115.3	19.6	 16
111	 18	177.8	15.1	 16
112	 18	243.3	39.5	 16
113	 18	93.5	30.8	 16
114	 18	76.5	10.9	 16
115	 18	223.8	33.3	 16
116	 18	156.8	20.6	 16
117	 18	153.0	25.5	 16
118	 18	137.5	20.7	 16
119	 18	171.3	23.4	 16
120	 18	91.5	13.3	 16
121	 18	74.3	9.4	 16
122	 18	73.3	12.7	 16
123	 18	97.0	15.5	 16
124	 18	149.5	19.0	 16
125	 18	114.5	21.3	 16
126	 18	162.5	21.7	 16
127	 18	100.3	18.7	 16
128	 18	76.5	13.5	 16
129	 18	94.3	15.9	 16
130	 18	83.3	16.8	 16
131	 18	166.5	23.1	 16
132	 18	81.5	13.1	 16
133	 18	84.3	13.8	 16
134	 18	99.3	29.6	 16
135	 18	81.0	11.8	 16
136	 18	81.8	13.7	 16
137	 18	85.0	12.8	 16
138	 18	73.5	12.0	 16
139	 18	74.3	13.3	 16
140	 18	74.5	11.6	 16
141	 18	67.0	8.7	 16
142	 18	102.3	15.9	 16
143	 18	67.3	14.6	 16
144	 18	94.8	14.8	 16
145	 18	76.0	11.5	 16
146	 18	97.3	16.8	 16
147	 18	84.0	14.6	 16
148	 18	97.0	16.0	 16
149	 18	77.5	14.4	 16
150	 18	75.8	14.0	 16
151	 18	95.0	17.4	 16
152	 18	89.0	12.2	 16
153	 18	93.8	11.7	 16
154	 18	123.8	19.4	 16
155	 18	95.0	16.0	 16
156	 18	80.5	11.5	 16
157	 18	218.8	20.2	 16
158	 18	106.5	16.0	 16
159	 18	123.3	14.7	 16
160	 18	215.8	17.6	 16
161	 18	112.8	21.9	 16
162	 18	131.8	18.2	 16
163	 18	74.5	11.3	 16
164	 18	109.0	14.2	 16
165	 18	79.0	8.2	 16
166	 18	78.8	11.1	 16
167	 18	89.3	14.0	 16
168	 18	92.8	13.2	 16
169	 18	97.0	15.3	 16
170	 18	202.0	29.1	 16
171	 18	85.5	14.2	 16
172	 18	412.5	29.0	 16
173	 18	183.0	27.6	 16
174	 18	128.3	16.1	 16
175	 18	240.8	21.8	 16
176	 18	581.3	58.7	 16
177	 18	378.5	34.9	 16
178	 18	703.0	40.7	 16
179	 18	365.0	50.5	 16
180	 18	138.0	17.3	 16
181	 18	114.3	17.8	 16
182	 18	178.8	25.5	 16
183	 18	131.8	20.9	 16
184	 18	93.0	16.5	 16
185	 18	65.0	12.4	 16
186	 18	96.0	18.3	 16
187	 18	98.0	21.5	 16
188	 18	71.3	10.3	 16
189	 18	132.3	33.1	 16
190	 18	69.0	8.6	 16
191	 18	107.3	20.0	 16
192	 18	97.0	21.2	 16
193	 18	171.3	53.9	 16
194	 18	1444.0	78.2	 16
195	 18	240.8	30.7	 16
196	 18	82.0	13.1	 16
197	 18	58.5	9.2	 16
198	 18	114.0	16.3	 16
199	 18	129.3	19.2	 16
200	 18	184.0	30.0	 16
201	 18	117.5	18.3	 16
202	 18	142.3	21.5	 16
203	 18	130.3	18.4	 16
204	 18	93.0	14.1	 16
205	 18	96.0	19.4	 16
206	 18	162.8	21.6	 16
207	 18	61.0	9.7	 16
208	 18	71.8	15.3	 16
209	 18	72.3	21.1	 16
210	 18	157.5	54.9	 16
211	 18	74.5	8.1	 16
212	 18	125.8	14.1	 16
213	 18	88.8	14.2	 16
214	 18	80.0	15.8	 16
215	 18	76.5	14.8	 16
216	 18	78.3	15.6	 16
217	 18	116.8	19.1	 16
218	 18	66.3	13.0	 16
219	 18	74.5	15.7	 16
220	 18	98.0	16.4	 16
221	 18	64.0	12.4	 16
222	 18	81.8	13.5	 16
223	 18	70.0	12.0	 16
224	 18	76.8	11.2	 16
225	 18	67.0	10.3	 16
226	 18	83.3	12.2	 16
227	 18	71.8	16.0	 16
228	 18	108.0	14.6	 16
229	 18	114.0	19.1	 16
230	 18	88.5	14.2	 16
231	 18	490.3	61.8	 16
232	 18	139.5	27.6	 16
233	 18	480.8	59.1	 16
234	 18	316.8	42.5	 16
235	 18	108.3	13.3	 16
236	 18	71.0	8.2	 16
237	 18	218.5	29.0	 16
238	 18	65.5	9.9	 16
239	 18	134.3	21.5	 16
240	 18	78.3	14.4	 16
241	 18	77.8	10.9	 16
242	 18	170.8	30.0	 16
243	 18	575.8	60.0	 16
244	 18	110.8	14.4	 16
245	 18	168.0	30.0	 16
246	 18	100.8	16.6	 16
247	 18	82.3	12.5	 16
248	 18	124.3	21.8	 16
249	 18	90.8	15.1	 16
250	 18	89.0	11.8	 16
251	 18	83.0	18.8	 16
252	 18	85.0	12.3	 16
253	 18	87.5	15.1	 16
254	 18	83.3	13.2	 16
255	 18	79.5	12.7	 16
256	 18	116.5	18.2	 16
257	 18	89.0	15.2	 20
258	 18	273.0	31.6	 16
259	 18	93.5	14.9	 16
260	 18	106.5	11.1	 16
261	 18	707.3	68.3	 16
262	 18	190.3	24.8	 16
263	 18	93.8	16.9	 16
264	 18	81.5	18.7	 16
265	 18	104.0	16.0	 16
266	 18	90.0	12.6	 16
267	 18	83.5	12.7	 16
268	 18	107.5	15.0	 16
269	 18	305.0	46.3	 16
270	 18	182.8	22.6	 16
271	 18	94.5	15.2	 16
272	 18	91.5	18.1	 16
273	 18	70.5	10.3	 16
274	 18	82.3	14.2	 16
275	 18	121.8	19.7	 16
276	 18	109.3	11.7	 16
277	 18	124.5	23.3	 16
278	 18	95.8	15.1	 16
279	 18	105.3	13.5	 16
280	 18	77.0	14.7	 16
281	 18	88.0	13.3	 16
282	 18	113.3	17.4	 16
283	 18	73.0	13.6	 16
284	 18	94.5	24.6	 16
285	 18	71.8	10.5	 16
286	 18	77.8	10.9	 16
287	 18	100.8	17.0	 16
288	 18	105.0	17.9	 16
289	 18	76.5	10.8	 16
290	 18	125.5	22.2	 16
291	 18	129.0	20.6	 16
292	 18	95.0	19.0	 16
293	 18	90.0	21.9	 16
294	 18	69.5	15.8	 16
295	 18	78.5	15.7	 16
296	 18	76.8	14.1	 16
297	 18	71.5	10.4	 16
298	 18	67.5	10.3	 16
299	 18	101.5	14.8	 16
300	 18	95.5	17.4	 16
301	 18	104.0	17.5	 16
302	 18	93.8	12.5	 16
303	 18	122.8	18.3	 16
304	 18	128.0	19.0	 16
305	 18	85.0	14.9	 16
306	 18	95.0	14.0	 16
307	 18	643.8	78.4	 16
308	 18	812.3	88.5	 16
309	 18	770.0	123.7	 16
310	 18	100.5	16.8	 16
311	 18	88.5	19.1	 16
312	 18	118.0	14.7	 16
313	 18	128.0	11.7	 16
314	 18	117.0	13.4	 16
315	 18	177.3	21.5	 16
316	 18	461.0	42.5	 16
317	 18	79.0	16.6	 16
318	 18	85.5	22.9	 16
319	 18	76.3	10.9	 16
320	 18	82.3	13.7	 16
321	 18	75.5	16.2	 16
322	 18	105.8	17.1	 16
323	 18	111.3	20.7	 16
324	 18	69.8	16.4	 16
325	 18	61.3	12.0	 16
326	 18	69.5	11.1	 16
327	 18	81.3	11.5	 16
328	 18	71.3	8.2	 16
329	 18	79.5	13.6	 16
330	 18	128.0	19.3	 16
331	 18	154.3	22.7	 16
332	 18	97.0	14.4	 16
333	 18	141.5	27.4	 16
334	 18	83.0	22.3	 16
335	 18	170.0	22.7	 16
336	 18	140.3	17.5	 16
337	 18	76.5	12.1	 16
338	 18	129.3	21.5	 16
339	 18	709.3	138.9	 16
340	 18	112.8	24.2	 16
341	 18	61.5	9.9	 16
342	 18	185.5	29.8	 16
343	 18	95.8	15.7	 16
344	 18	115.8	16.0	 16
345	 18	106.3	18.9	 16
346	 18	103.3	12.7	 16
347	 18	230.5	21.5	 16
348	 18	180.0	19.7	 16
349	 18	189.0	22.9	 16
350	 18	79.0	17.1	 16
351	 18	72.3	10.0	 16
352	 18	779.0	42.1	 16
353	 18	85.3	13.1	 16
354	 18	188.0	23.2	 16
355	 18	97.0	14.7	 16
356	 18	86.5	15.6	 16
357	 18	92.5	16.2	 16
358	 18	92.3	13.6	 16
359	 18	90.3	8.2	 16
360	 18	79.8	14.8	 16
361	 18	101.3	16.7	 16
362	 18	101.8	17.6	 16
363	 18	141.5	15.1	 16
364	 18	168.5	25.9	 16
365	 18	112.3	21.7	 16
366	 18	104.3	15.0	 16
367	 18	65.0	12.2	 16
368	 18	69.0	9.8	 16
369	 18	158.0	34.6	 16
370	 18	80.5	18.4	 16
371	 18	78.5	11.1	 16
372	 18	91.0	12.1	 16
373	 18	78.0	14.4	 16
374	 18	70.8	11.7	 16
375	 18	85.0	15.4	 16
376	 18	75.3	12.2	 16
377	 18	113.0	18.5	 16
378	 18	69.3	12.9	 16
379	 18	69.0	14.1	 16
380	 18	97.3	11.8	 16
381	 18	212.5	31.2	 16
382	 18	74.8	9.2	 16
383	 18	136.8	14.9	 16
384	 18	104.5	12.0	 16
385	 18	822.0	104.7	 16
386	 18	221.3	49.6	 16
387	 18	128.3	15.0	 16
388	 18	62.3	11.4	 16
389	 18	147.0	20.9	 16
390	 18	83.5	9.7	 16
391	 18	113.5	19.1	 16
392	 18	79.5	13.7	 16
393	 18	85.3	16.4	 16
394	 18	112.0	19.0	 16
395	 18	186.0	26.7	 16
396	 18	113.5	17.0	 16
397	 18	78.3	15.5	 16
398	 18	82.5	11.0	 16
399	 18	73.5	13.8	 16
400	 18	77.3	13.4	 16
401	 18	81.5	15.0	 16
402	 18	157.8	20.9	 16
403	 18	125.0	12.0	 16
404	 18	316.0	33.2	 16
405	 18	78.3	14.3	 16
406	 18	69.0	10.9	 16
407	 18	105.0	22.9	 16
408	 18	70.3	12.0	 16
409	 18	69.3	13.8	 16
410	 18	65.8	12.0	 16
411	 18	75.0	17.2	 16
412	 18	93.0	19.1	 16
413	 18	107.0	12.3	 16
414	 18	150.8	21.8	 16
415	 18	72.5	12.6	 16
416	 18	64.3	13.1	 16
417	 18	80.0	10.0	 16
418	 18	92.5	12.2	 16
419	 18	70.0	16.6	 16
420	 18	91.3	11.4	 16
421	 18	98.0	21.6	 16
422	 18	176.3	18.3	 16
423	 18	130.5	12.5	 16
424	 18	137.0	23.1	 16
425	 18	104.5	14.6	 16
426	 18	169.8	27.5	 16
427	 18	140.3	13.8	 16
428	 18	76.3	11.8	 16
429	 18	71.5	14.3	 16
430	 18	182.0	17.1	 16
431	 18	194.3	18.5	 16
432	 18	169.5	24.6	 16
433	 18	69.3	15.2	 16
434	 18	93.0	16.1	 16
435	 18	88.0	14.4	 20
436	 18	94.0	17.1	 16
437	 18	91.8	14.3	 16
438	 18	105.8	14.5	 16
439	 18	73.8	11.8	 16
440	 18	93.5	15.6	 16
441	 18	90.5	11.7	 16
442	 18	187.3	25.4	 16
443	 18	208.3	30.3	 16
444	 18	135.0	22.9	 16
445	 18	115.0	26.5	 16
446	 18	99.0	13.2	 16
447	 18	87.5	12.5	 16
448	 18	117.5	17.8	 16
449	 18	122.3	14.1	 16
450	 18	163.8	19.7	 16
451	 18	152.5	18.9	 16
452	 18	227.0	21.7	 16
453	 18	113.3	11.8	 16
454	 18	105.3	15.5	 16
455	 18	92.5	13.8	 16
456	 18	91.5	11.0	 16
457	 18	65.3	15.9	 16
458	 18	88.5	17.1	 16
459	 18	73.0	8.6	 16
460	 18	114.5	15.9	 16
461	 18	81.3	12.8	 16
462	 18	148.3	21.2	 16
463	 18	150.3	18.4	 16
464	 18	233.3	29.9	 16
465	 18	118.3	15.3	 16
466	 18	66.5	9.3	 16
467	 18	225.5	29.4	 16
468	 18	109.8	17.7	 16
469	 18	85.0	15.5	 16
470	 18	148.0	24.6	 16
471	 18	84.3	11.4	 16
472	 18	85.5	17.1	 16
473	 18	68.8	13.9	 16
474	 18	81.0	11.3	 16
475	 18	314.0	38.3	 16
476	 18	97.5	21.1	 16
477	 18	83.8	20.3	 16
478	 18	172.5	29.0	 16
479	 18	184.3	26.5	 16
480	 18	142.5	21.1	 16
481	 18	116.0	14.8	 16
482	 18	289.8	35.9	 16
483	 18	157.0	30.6	 16
484	 18	78.5	16.5	 16
485	 18	201.3	41.6	 16
486	 18	81.8	15.9	 16
487	 18	208.5	21.9	 16
488	 18	74.3	11.0	 16
489	 18	91.0	12.7	 16
490	 18	102.3	12.0	 16
491	 18	81.5	12.5	 16
492	 18	71.0	11.1	 16
493	 18	105.0	14.0	 16
494	 18	248.0	38.5	 16
495	 18	188.3	25.4	 16
496	 18	130.0	18.9	 16
497	 18	87.5	20.1	 16
498	 18	156.0	22.4	 16
499	 18	80.5	14.9	 16
500	 18	87.5	13.0	 16
501	 18	71.0	12.2	 16
502	 18	92.0	12.9	 16
503	 18	93.0	14.4	 16
504	 18	87.5	16.7	 16
505	 18	73.0	11.5	 16
506	 18	67.3	12.3	 16
507	 18	70.8	10.4	 16
508	 18	62.8	7.9	 16
509	 18	68.8	10.3	 16
510	 18	88.3	13.4	 16
511	 18	143.0	15.6	 16
512	 18	80.0	11.9	 16
513	 18	68.0	9.5	 16
514	 18	70.0	9.5	 16
515	 18	139.3	22.4	 16
516	 18	118.8	33.8	 16
517	 18	82.8	19.9	 16
518	 18	82.5	11.2	 16
519	 18	81.5	14.8	 16
520	 18	101.3	26.8	 16
521	 18	67.0	11.9	 16
522	 18	77.3	16.2	 16
523	 18	153.0	17.6	 16
524	 18	68.3	10.2	 16
525	 18	77.3	12.2	 16
526	 18	79.3	16.8	 16
527	 18	87.3	47.7	 16
528	 18	126.3	18.6	 16
529	 18	72.5	11.4	 16
530	 18	81.3	8.8	 16
531	 18	71.3	10.2	 16
532	 18	76.3	20.9	 16
533	 18	100.5	14.0	 16
534	 18	112.0	17.4	 16
535	 18	64.3	10.3	 16
536	 18	72.5	10.6	 16
537	 18	64.3	14.9	 16
538	 18	68.8	15.4	 16
539	 18	68.3	9.5	 16
540	 18	155.5	30.3	 12
541	 18	292.0	38.2	 16
542	 18	199.8	20.4	 16
543	 18	114.5	17.1	 16
544	 18	77.0	11.7	 16
545	 18	127.5	11.1	 16
546	 18	194.3	34.2	 16
547	 18	195.3	25.6	 16
548	 18	95.8	19.2	 16
549	 18	103.3	14.3	 16
550	 18	294.8	51.7	 16
551	 18	116.0	23.3	 16
552	 18	132.0	24.4	 16
553	 18	92.5	13.5	 16
554	 18	113.0	18.9	 16
555	 18	135.0	20.6	 16
556	 18	139.5	21.4	 16
557	 18	75.5	10.7	 16
558	 18	82.3	13.0	 16
559	 18	567.3	115.5	 16
560	 18	116.8	31.6	 16
561	 18	78.3	16.6	 16
562	 18	72.5	11.3	 16
563	 18	166.3	28.5	 16
564	 18	195.0	32.3	 16
565	 18	76.0	12.2	 16
566	 18	83.5	14.5	 16
567	 18	89.3	17.0	 16
568	 18	86.3	16.9	 16
569	 18	86.3	15.3	 16
570	 18	78.3	11.9	 16
571	 18	68.5	10.4	 16
572	 18	80.5	13.6	 16
573	 18	164.3	23.5	 16
574	 18	138.5	18.4	 16
575	 18	451.5	88.5	 16
576	 18	409.0	72.7	 16
577	 18	149.5	28.9	 16
578	 18	90.8	11.6	 16
579	 18	98.3	16.1	 16
580	 18	374.8	55.1	 16
581	 18	201.5	56.1	 16
582	 18	193.5	27.3	 16
583	 18	94.0	15.9	 16
584	 18	296.3	74.4	 16
585	 18	218.3	25.7	 16
586	 18	137.8	20.2	 16
587	 18	90.8	14.7	 16
588	 18	71.5	11.0	 16
589	 18	118.0	19.4	 16
590	 18	107.0	15.3	 16
591	 18	73.5	8.9	 16
592	 18	85.0	14.1	 16
593	 18	74.3	15.9	 16
594	 18	77.3	10.0	 16
595	 18	102.5	17.5	 16
596	 18	289.3	61.2	 16
597	 18	172.8	20.9	 16
598	 18	112.5	33.7	 16
599	 18	108.5	16.0	 16
600	 18	122.3	14.5	 16
601	 18	358.0	62.0	 16
602	 18	728.8	82.8	 16
603	 18	154.3	21.9	 16
604	 18	221.0	47.7	 16
605	 18	127.0	17.8	 16
606	 18	114.3	21.5	 16
607	 18	76.3	15.8	 16
608	 18	109.0	13.5	 16
609	 18	84.3	18.0	 16
610	 18	70.0	12.7	 16
611	 18	137.5	18.7	 16
612	 18	73.0	10.7	 16
613	 18	62.3	9.6	 20
614	 18	79.5	14.4	 16
615	 18	184.5	26.5	 16
616	 18	174.0	21.1	 16
617	 18	150.0	29.2	 16
618	 18	155.5	20.4	 16
619	 18	93.5	14.0	 16
620	 18	381.0	46.9	 16
621	 18	107.0	20.0	 16
622	 18	357.8	54.0	 16
623	 18	106.8	19.1	 16
624	 18	139.5	22.1	 16
625	 18	447.3	55.2	 16
626	 18	96.0	17.9	 16
627	 18	71.5	6.2	 16
628	 18	204.8	26.4	 16
629	 18	159.3	19.3	 16
630	 18	124.3	13.9	 16
631	 18	104.3	14.3	 16
632	 18	74.8	14.6	 16
633	 18	73.8	11.6	 16
634	 18	78.3	10.6	 16
635	 18	111.3	15.7	 16
636	 18	71.8	13.2	 16
637	 18	84.5	17.1	 16
638	 18	72.3	10.9	 16
639	 18	180.0	30.9	 16
640	 18	96.3	21.2	 16
641	 18	99.3	21.0	 16
642	 18	167.3	18.1	 16
643	 18	151.5	22.1	 16
644	 18	62.5	10.1	 16
645	 18	94.8	19.4	 16
646	 18	99.3	18.7	 16
647	 18	157.3	20.0	 16
648	 18	160.0	27.3	 16
649	 18	154.3	17.6	 16
650	 18	130.8	20.3	 16
651	 18	79.0	16.9	 16
652	 18	98.5	15.9	 16
653	 18	120.0	23.6	 16
654	 18	113.3	16.0	 16
655	 18	63.5	8.2	 16
656	 18	63.0	9.8	 16
657	 18	155.3	18.6	 16
658	 18	68.5	11.9	 16
659	 18	86.0	11.7	 16
660	 18	73.3	12.2	 16
661	 18	76.5	16.8	 16
662	 18	92.5	16.7	 16
663	 18	81.8	13.6	 16
664	 18	81.5	9.0	 16
665	 18	74.3	16.5	 16
666	 18	117.0	17.6	 16
667	 18	77.5	12.7	 16
668	 18	70.5	11.0	 16
669	 18	73.8	11.0	 16
670	 18	65.5	10.5	 16
671	 18	353.3	60.8	 16
672	 18	351.8	31.2	 16
673	 18	73.0	12.0	 16
674	 18	102.3	23.0	 16
675	 18	245.0	31.2	 16
676	 18	107.0	13.6	 16
677	 18	560.0	56.8	 16
678	 18	97.0	13.1	 16
679	 18	106.3	18.3	 16
680	 18	84.3	12.5	 16
681	 18	124.3	17.0	 16
682	 18	83.0	8.3	 16
683	 18	95.5	14.1	 16
684	 18	140.3	23.4	 16
685	 18	136.8	14.4	 16
686	 18	121.5	28.7	 16
687	 18	163.3	11.3	 16
688	 18	198.3	16.6	 16
689	 18	77.3	15.2	 16
690	 18	91.0	15.2	 16
691	 18	77.0	8.6	 16
692	 18	115.5	20.9	 16
693	 18	136.5	17.9	 16
694	 18	88.3	14.6	 16
695	 18	74.3	8.0	 16
696	 18	699.3	90.9	 16
697	 18	112.5	15.6	 16
698	 18	107.8	10.4	 16
699	 18	78.8	12.7	 16
700	 18	66.5	11.7	 16
701	 18	71.0	13.6	 16
702	 18	132.8	22.2	 16
703	 18	83.5	22.7	 16
704	 18	232.5	26.2	 16
705	 18	155.8	21.5	 16
706	 18	104.3	16.1	 16
707	 18	121.5	18.9	 16
708	 18	72.3	10.4	 16
709	 18	92.3	13.5	 16
710	 18	416.3	51.1	 16
711	 18	446.0	100.1	 16
  0	 19	110.3	18.5	 16
  1	 19	128.5	19.2	 16
  2	 19	117.5	23.6	 16
  3	 19	306.3	48.6	 16
  4	 19	230.5	59.9	 16
  5	 19	187.8	23.2	 16
  6	 19	102.3	18.2	 16
  7	 19	75.0	10.9	 16
  8	 19	165.0	36.2	 16
  9	 19	70.8	14.0	 16
 10	 19	82.5	18.4	 16
 11	 19	224.0	38.3	 16
 12	 19	219.3	37.3	 16
 13	 19	184.8	38.6	 16
 14	 19	278.8	35.0	 16
 15	 19	219.8	19.7	 16
 16	 19	316.8	33.4	 16
 17	 19	214.5	22.9	 16
 18	 19	183.0	26.2	 16
 19	 19	172.0	20.2	 16
 20	 19	106.0	16.6	 16
 21	 19	139.3	24.4	 16
 22	 19	206.3	22.1	 16
 23	 19	266.8	37.9	 16
 24	 19	422.5	54.5	 16
 25	 19	151.5	15.7	 16
 26	 19	156.8	27.1	 16
 27	 19	485.3	69.2	 16
 28	 19	79.3	10.8	 16
 29	 19	82.0	15.2	 16
 30	 19	93.5	20.7	 16
 31	 19	195.0	24.7	 16
 32	 19	79.0	12.2	 16
 33	 19	94.0	19.1	 16
 34	 19	241.8	24.5	 16
 35	 19	203.0	40.4	 16
 36	 19	369.0	45.4	 16
 37	 19	167.3	22.2	 16
 38	 19	3704.0	352.2	 16
 39	 19	520.8	55.8	 16
 40	 19	162.8	20.5	 16
 41	 19	98.5	21.3	 16
 42	 19	75.3	17.8	 16
 43	 19	186.5	33.2	 16
 44	 19	454.0	56.7	 16
 45	 19	98.0	12.7	 16
 46	 19	187.5	23.9	 16
 47	 19	380.8	29.8	 16
 48	 19	194.5	25.2	 16
 49	 19	1199.3	129.5	 16
 50	 19	84.3	13.7	 16
 51	 19	219.5	26.8	 16
 52	 19	115.3	20.8	 16
 53	 19	261.5	27.6	 16
 54	 19	97.3	14.4	 16
 55	 19	396.5	52.5	 16
 56	 19	571.0	52.9	 16
 57	 19	134.3	20.2	 16
 58	 19	258.5	28.4	 16
 59	 19	372.5	59.2	 16
 60	 19	265.3	36.2	 16
 61	 19	413.8	64.6	 16
 62	 19	171.3	18.1	 16
 63	 19	399.8	27.1	 16
 64	 19	245.8	25.5	 16
 65	 19	166.0	26.9	 16
 66	 19	145.8	21.0	 16
 67	 19	102.3	13.3	 16
 68	 19	97.5	15.0	 16
 69	 19	249.3	41.8	 16
 70	 19	582.0	85.4	 16
 71	 19	855.8	137.0	 16
 72	 19	250.3	29.4	 16
 73	 19	272.3	28.1	 16
 74	 19	218.8	29.8	 16
 75	 19	91.0	11.7	 16
 76	 19	122.8	22.8	 16
 77	 19	428.5	91.3	 16
 78	 19	129.0	21.1	 16
 79	 19	88.5	15.6	 16
 80	 19	84.3	17.7	 16
 81	 19	114.3	17.1	 16
 82	 19	110.3	16.1	 16
 83	 19	489.8	62.8	 16
 84	 19	115.0	19.1	 16
 85	 19	246.8	38.4	 16
 86	 19	192.0	30.6	 16
 87	 19	2553.8	395.6	 16
 88	 19	160.3	20.0	 16
 89	 19	97.5	17.6	 16
 90	 19	890.5	104.2	 16
 91	 19	300.3	32.4	 16
 92	 19	76.0	12.4	 16
 93	 19	91.3	17.4	 16
 94	 19	157.5	23.5	 16
 95	 19	315.8	52.7	 16
 96	 19	931.5	131.9	 16
 97	 19	106.3	10.8	 16
 98	 19	151.0	21.9	 20
 99	 19	105.5	22.1	 16
100	 19	149.3	25.7	 16
101	 19	143.8	27.4	 16
102	 19	553.0	46.3	 16
103	 19	268.8	32.4	 16
104	 19	237.5	26.2	 16
105	 19	307.8	46.7	 16
106	 19	242.0	27.6	 16
107	 19	287.3	62.7	 16
108	 19	79.0	12.7	 16
109	 19	92.5	15.3	 16
110	 19	111.8	22.6	 16
111	 19	271.0	26.3	 16
112	 19	174.3	32.0	 16
113	 19	749.0	94.8	 16
114	 19	98.3	16.2	 16
115	 19	88.3	11.3	 16
116	 19	102.5	14.8	 16
117	 19	93.3	18.1	 16
118	 19	78.5	18.0	 16
119	 19	1201.5	228.5	 16
120	 19	83.5	9.8	 16
121	 19	76.0	12.5	 16
122	 19	92.5	16.4	 16
123	 19	105.0	18.3	 16
124	 19	99.3	18.3	 16
125	 19	109.3	15.2	 16
126	 19	195.8	27.2	 16
127	 19	517.8	55.1	 16
128	 19	152.3	17.7	 16
129	 19	108.0	17.5	 16
130	 19	141.5	32.9	 16
131	 19	412.3	43.7	 16
132	 19	157.5	21.6	 16
133	 19	77.5	15.6	 16
134	 19	139.0	22.9	 16
135	 19	88.3	18.5	 16
136	 19	77.0	15.1	 16
137	 19	326.8	58.6	 16
138	 19	107.8	17.9	 16
139	 19	333.0	36.2	 16
140	 19	114.8	20.9	 16
141	 19	818.0	75.7	 16
142	 19	92.0	14.5	 16
143	 19	155.5	18.6	 16
144	 19	69.0	13.0	 16
145	 19	360.5	60.4	 16
146	 19	132.0	21.6	 16
147	 19	97.8	16.5	 16
148	 19	72.8	12.6	 16
149	 19	101.8	14.5	 16
150	 19	179.5	22.3	 16
151	 19	159.3	20.5	 16
152	 19	131.3	14.5	 16
153	 19	342.8	83.8	 16
154	 19	850.3	170.5	 16
155	 19	182.8	20.2	 16
156	 19	95.0	13.8	 16
157	 19	335.3	28.6	 16
158	 19	444.8	68.6	 16
159	 19	163.5	14.4	 16
160	 19	356.3	61.2	 16
161	 19	100.5	18.0	 16
162	 19	192.3	27.6	 16
163	 19	365.3	53.7	 16
164	 19	201.3	19.0	 16
165	 19	98.3	16.6	 16
166	 19	149.5	17.7	 16
167	 19	86.0	14.6	 16
168	 19	362.3	59.5	 16
169	 19	72.3	11.7	 16
170	 19	357.3	70.3	 16
171	 19	130.3	18.6	 16
172	 19	155.0	22.1	 16
173	 19	499.0	55.4	 16
174	 19	177.5	17.1	 16
175	 19	80.5	11.0	 16
176	 19	151.0	19.5	 16
177	 19	84.3	17.6	 16
178	 19	239.8	39.0	 16
179	 19	150.3	21.2	 16
180	 19	263.8	36.2	 16
181	 19	210.8	25.7	 16
182	 19	80.5	16.4	 16
183	 19	408.3	50.6	 16
184	 19	106.0	13.6	 16
185	 19	233.0	33.0	 16
186	 19	177.8	21.5	 16
187	 19	379.0	56.7	 16
188	 19	87.8	15.0	 16
189	 19	64.3	14.4	 16
190	 19	114.8	16.4	 16
191	 19	289.8	47.7	 16
192	 19	185.8	25.8	 16
193	 19	261.3	35.7	 16
194	 19	108.5	26.3	 16
195	 19	474.8	55.2	 16
196	 19	84.3	13.9	 16
197	 19	110.5	11.9	 16
198	 19	136.0	23.7	 16
199	 19	282.5	35.6	 16
200	 19	463.3	75.7	 16
201	 19	462.8	52.1	 16
202	 19	265.3	30.6	 16
203	 19	179.5	24.2	 16
204	 19	185.5	22.6	 16
205	 19	184.3	13.1	 16
206	 19	81.0	11.4	 16
207	 19	83.3	12.3	 16
208	 19	574.0	62.1	 16
209	 19	75.8	12.7	 16
210	 19	83.5	15.8	 16
211	 19	84.0	9.2	 16
212	 19	70.0	9.0	 16
213	 19	84.3	13.3	 16
214	 19	87.5	12.5	 16
215	 19	1533.8	177.1	 16
216	 19	101.3	31.3	 16
217	 19	581.0	61.3	 16
218	 19	144.5	20.9	 16
219	 19	94.8	16.8	 16
220	 19	68.8	8.1	 16
221	 19	103.3	21.7	 16
222	 19	352.0	29.7	 16
223	 19	56.0	10.6	 16
224	 19	307.8	37.4	 16
225	 19	75.0	17.1	 16
226	 19	88.3	17.1	 16
227	 19	188.8	27.6	 16
228	 19	117.0	18.9	 16
229	 19	1799.0	208.5	 16
230	 19	257.0	42.8	 16
231	 19	396.5	37.2	 16
232	 19	72.0	11.5	 16
233	 19	83.3	9.9	 16
234	 19	68.0	12.4	 16
235	 19	211.0	29.0	 16
236	 19	174.3	30.9	 16
237	 19	83.3	17.6	 16
238	 19	241.8	39.4	 16
239	 19	85.3	13.2	 16
240	 19	127.3	19.9	 16
241	 19	127.8	16.1	 16
242	 19	71.0	11.6	 16
243	 19	100.5	16.2	 16
244	 19	128.3	19.3	 16
245	 19	98.8	12.4	 16
246	 19	126.5	23.3	 16
247	 19	80.0	9.4	 16
248	 19	1230.5	150.7	 16
249	 19	91.5	14.9	 16
250	 19	69.0	8.6	 16
251	 19	70.3	9.1	 16
252	 19	72.0	8.7	 16
253	 19	71.3	12.6	 16
254	 19	83.3	12.1	 16
255	 19	82.3	20.1	 16
256	 19	82.0	13.6	 16
257	 19	165.3	31.3	 16
258	 19	75.3	13.5	 16
259	 19	249.8	37.4	 16
260	 19	150.3	22.9	 16
261	 19	301.0	31.0	 16
262	 19	318.0	38.5	 16
263	 19	66.0	8.3	 16
264	 19	187.0	25.5	 16
265	 19	93.3	15.8	 16
266	 19	191.5	29.1	 16
267	 19	154.0	23.7	 16
268	 19	113.5	14.2	 16
269	 19	241.3	45.2	 16
270	 19	218.5	25.7	 16
271	 19	2050.8	401.7	 16
272	 19	450.0	43.3	 16
273	 19	95.3	17.1	 16
274	 19	105.8	18.7	 16
275	 19	171.0	31.8	 16
276	 19	170.0	24.9	 20
277	 19	71.5	12.1	 16
278	 19	165.3	25.6	 16
279	 19	98.8	17.5	 16
280	 19	157.8	25.2	 16
281	 19	75.8	11.1	 16
282	 19	71.8	11.6	 16
283	 19	73.5	16.2	 16
284	 19	118.5	20.3	 16
285	 19	72.3	10.6	 16
286	 19	74.5	16.7	 16
287	 19	154.0	25.8	 16
288	 19	85.3	16.2	 16
289	 19	249.0	36.6	 16
290	 19	364.5	39.6	 16
291	 19	263.5	37.4	 16
292	 19	99.8	12.2	 16
293	 19	258.8	30.3	 16
294	 19	231.3	25.6	 16
295	 19	100.0	16.0	 16
296	 19	108.0	16.0	 16
297	 19	84.5	17.1	 16
298	 19	86.5	10.4	 16
299	 19	114.3	14.9	 16
300	 19	74.0	11.7	 16
301	 19	73.5	12.0	 16
302	 19	218.5	28.2	 16
303	 19	241.5	23.4	 16
304	 19	332.0	46.2	 16
305	 19	101.3	14.2	 16
306	 19	199.3	17.8	 16
307	 19	202.0	32.9	 16
308	 19	159.5	49.4	 16
309	 19	90.5	9.8	 16
310	 19	366.3	50.7	 16
311	 19	90.8	13.8	 16
312	 19	616.0	54.2	 16
313	 19	78.0	18.9	 16
314	 19	138.8	19.1	 16
315	 19	153.3	20.1	 16
316	 19	78.5	11.8	 16
317	 19	433.0	50.8	 16
318	 19	175.8	30.5	 16
319	 19	112.3	12.5	 16
320	 19	266.0	31.9	 16
321	 19	440.8	40.4	 16
322	 19	100.3	16.6	 16
323	 19	112.0	17.1	 16
324	 19	152.5	20.8	 16
325	 19	69.5	14.9	 16
326	 19	588.0	52.0	 16
327	 19	104.0	11.2	 16
328	 19	78.5	13.0	 16
329	 19	68.5	11.8	 16
330	 19	76.3	8.8	 16
331	 19	107.0	22.2	 16
332	 19	72.0	13.1	 16
333	 19	463.5	66.5	 16
334	 19	140.0	23.3	 16
335	 19	487.3	46.4	 16
336	 19	69.5	12.0	 16
337	 19	67.3	10.1	 16
338	 19	179.5	25.0	 16
339	 19	109.0	32.6	 16
340	 19	103.0	18.3	 16
341	 19	80.5	17.7	 16
342	 19	66.5	12.2	 16
343	 19	77.3	10.4	 16
344	 19	69.5	13.0	 16
345	 19	73.0	13.6	 16
346	 19	69.5	14.2	 16
347	 19	71.8	10.9	 16
348	 19	139.8	21.5	 16
349	 19	155.5	24.6	 16
350	 19	86.3	15.5	 16
351	 19	157.5	21.0	 16
352	 19	100.3	12.5	 16
353	 19	210.0	25.5	 16
354	 19	95.8	14.4	 16
355	 19	143.5	22.5	 16
356	 19	144.5	18.8	 16
357	 19	442.0	46.8	 16
358	 19	5981.8	480.4	 16
359	 19	278.3	42.7	 16
360	 19	131.0	16.4	 16
361	 19	533.8	41.0	 16
362	 19	99.0	9.5	 16
363	 19	112.5	18.3	 16
364	 19	222.3	36.4	 16
365	 19	125.3	22.4	 16
366	 19	138.0	23.7	 16
367	 19	75.3	14.7	 16
368	 19	85.3	16.3	 16
369	 19	160.8	19.2	 16
370	 19	79.3	11.5	 16
371	 19	96.0	15.0	 16
372	 19	111.0	14.1	 16
373	 19	369.5	28.2	 16
374	 19	198.8	25.0	 16
375	 19	89.8	11.9	 16
376	 19	153.8	22.3	 16
377	 19	195.5	22.5	 16
378	 19	81.3	13.4	 16
379	 19	87.0	15.2	 16
380	 19	2702.8	350.2	 16
381	 19	263.8	32.7	 16
382	 19	92.3	39.4	 16
383	 19	136.0	22.7	 16
384	 19	782.3	98.2	 16
385	 19	135.3	31.9	 16
386	 19	94.5	15.5	 16
387	 19	531.3	74.3	 16
388	 19	146.5	14.5	 16
389	 19	109.5	94.0	 16
390	 19	106.5	12.5	 16
391	 19	91.3	16.6	 16
392	 19	110.0	15.8	 16
393	 19	359.3	52.1	 16
394	 19	84.3	10.6	 16
395	 19	262.3	43.0	 16
396	 19	137.3	18.4	 16
397	 19	72.5	10.2	 16
398	 19	71.8	14.9	 16
399	 19	210.5	28.5	 16
400	 19	1482.3	225.3	 16
401	 19	69.5	11.9	 16
402	 19	271.3	42.5	 16
403	 19	179.3	20.1	 16
404	 19	99.5	17.6	 16
405	 19	87.8	14.5	 16
406	 19	85.3	16.6	 16
407	 19	226.5	36.3	 16
408	 19	1226.8	177.5	 16
409	 19	3025.5	502.4	 16
410	 19	76.5	17.6	 16
411	 19	92.3	12.2	 16
412	 19	168.3	21.1	 16
413	 19	105.8	56.4	 16
414	 19	156.0	30.9	 16
415	 19	101.3	15.6	 16
416	 19	156.3	19.8	 16
417	 19	80.0	15.3	 16
418	 19	787.3	165.2	 16
419	 19	70.5	11.5	 16
420	 19	251.0	39.8	 16
421	 19	74.5	10.2	 16
422	 19	143.8	17.5	 16
423	 19	316.5	48.4	 16
424	 19	373.3	36.2	 16
425	 19	414.0	78.8	 16
426	 19	126.8	25.8	 16
427	 19	135.8	18.5	 16
428	 19	248.0	28.3	 16
429	 19	159.3	26.0	 16
430	 19	87.5	11.7	 16
431	 19	159.8	21.8	 16
432	 19	150.5	16.9	 16
433	 19	127.8	23.9	 16
434	 19	1732.3	373.6	 16
435	 19	83.0	13.4	 16
436	 19	186.0	23.5	 16
437	 19	197.3	32.1	 16
438	 19	73.3	11.9	 16
439	 19	69.5	10.6	 16
440	 19	112.3	18.6	 16
441	 19	185.0	31.3	 16
442	 19	116.3	13.2	 16
443	 19	153.5	17.7	 16
444	 19	300.5	29.4	 16
445	 19	166.0	26.4	 16
446	 19	194.8	29.1	 16
447	 19	96.0	13.3	 16
448	 19	126.3	18.5	 16
449	 19	161.3	31.4	 16
450	 19	129.3	16.5	 16
451	 19	216.5	26.0	 16
452	 19	120.0	17.1	 16
453	 19	79.3	12.9	 16
454	 19	77.0	15.3	 20
455	 19	78.3	12.6	 16
456	 19	134.8	19.4	 16
457	 19	73.3	10.5	 16
458	 19	497.3	60.0	 16
459	 19	95.5	18.2	 16
460	 19	80.3	11.4	 16
461	 19	64.3	11.0	 16
462	 19	96.0	12.7	 16
463	 19	105.8	19.0	 16
464	 19	74.0	8.4	 16
465	 19	70.8	14.0	 16
466	 19	67.5	11.5	 16
467	 19	70.3	9.3	 16
468	 19	526.0	62.7	 16
469	 19	127.3	16.5	 16
470	 19	1562.8	147.2	 16
471	 19	400.3	34.0	 16
472	 19	96.0	11.7	 16
473	 19	136.0	18.1	 12
474	 19	74.8	11.6	 16
475	 19	231.3	17.5	 16
476	 19	230.8	33.1	 16
477	 19	77.0	14.1	 16
478	 19	123.3	21.3	 16
479	 19	110.8	14.4	 16
480	 19	145.3	18.6	 16
481	 19	85.0	13.9	 16
482	 19	88.8	15.1	 16
483	 19	77.3	16.9	 16
484	 19	78.5	11.1	 16
485	 19	410.3	43.4	 16
486	 19	415.5	41.9	 16
487	 19	236.3	28.9	 16
488	 19	554.5	82.7	 16
489	 19	129.3	13.3	 16
490	 19	126.3	17.1	 16
491	 19	149.0	28.3	 16
492	 19	104.0	10.8	 16
493	 19	88.3	10.3	 16
494	 19	104.3	16.7	 16
495	 19	103.0	14.6	 16
496	 19	1268.5	149.1	 16
497	 19	188.3	27.2	 16
498	 19	770.3	133.4	 16
499	 19	88.3	15.7	 16
500	 19	87.3	16.9	 16
501	 19	112.0	21.2	 16
502	 19	97.5	11.6	 16
503	 19	323.8	34.8	 16
504	 19	85.3	9.0	 16
505	 19	93.3	15.0	 16
506	 19	109.5	21.4	 16
507	 19	293.3	19.9	 16
508	 19	101.3	15.1	 16
509	 19	784.3	61.3	 16
510	 19	135.5	18.0	 16
511	 19	151.5	28.1	 16
512	 19	75.8	16.4	 16
513	 19	70.8	11.6	 16
514	 19	297.5	46.4	 16
515	 19	82.8	14.2	 16
516	 19	110.0	16.9	 16
517	 19	329.3	47.6	 16
518	 19	63.3	15.6	 16
519	 19	69.3	10.6	 16
520	 19	75.5	12.4	 16
521	 19	74.0	15.9	 16
522	 19	71.0	12.8	 16
523	 19	332.5	45.6	 16
524	 19	78.0	11.1	 16
525	 19	113.5	15.7	 16
526	 19	201.3	25.5	 16
527	 19	106.0	13.9	 16
528	 19	124.3	15.5	 16
529	 19	268.0	38.8	 16
530	 19	143.0	20.5	 16
531	 19	347.8	38.8	 16
532	 19	194.0	29.8	 16
533	 19	177.8	28.2	 16
534	 19	113.8	15.0	 16
535	 19	157.8	22.9	 16
536	 19	74.5	10.5	 16
537	 19	89.3	12.4	 16
538	 19	94.8	16.8	 16
539	 19	182.8	33.4	 16
540	 19	208.5	40.3	 16
541	 19	103.5	19.9	 16
542	 19	94.3	15.5	 16
543	 19	188.0	24.6	 16
544	 19	88.0	14.9	 16
545	 19	189.5	31.4	 16
546	 19	105.5	14.3	 16
547	 19	96.3	23.1	 16
548	 19	161.0	23.2	 16
549	 19	277.5	57.4	 16
550	 19	91.8	10.4	 16
551	 19	119.3	16.8	 16
552	 19	78.3	14.1	 16
553	 19	129.0	15.9	 16
554	 19	88.3	14.3	 16
555	 19	67.0	12.0	 16
556	 19	117.5	16.6	 16
557	 19	576.8	92.0	 16
558	 19	78.8	17.4	 16
559	 19	746.5	141.7	 16
560	 19	177.5	18.6	 16
561	 19	77.0	14.0	 16
562	 19	153.8	26.6	 16
563	 19	181.5	29.9	 16
564	 19	93.8	14.9	 16
565	 19	79.3	14.9	 16
566	 19	615.8	134.5	 16
567	 19	83.3	13.9	 16
568	 19	580.3	81.3	 16
569	 19	99.5	17.8	 16
570	 19	80.3	24.8	 16
571	 19	102.5	15.8	 16
572	 19	97.8	15.1	 16
573	 19	95.3	12.1	 16
574	 19	152.0	26.7	 16
575	 19	128.8	41.4	 16
576	 19	103.3	11.6	 16
577	 19	86.3	12.5	 16
578	 19	110.0	18.2	 16
579	 19	228.3	26.3	 16
580	 19	321.5	42.8	 16
581	 19	453.3	36.9	 16
582	 19	136.5	21.1	 16
583	 19	248.0	50.5	 16
584	 19	108.0	13.0	 16
585	 19	134.5	22.8	 16
586	 19	704.0	186.9	 16
587	 19	1648.8	472.5	 16
588	 19	224.0	47.5	 16
589	 19	71.8	11.5	 16
590	 19	138.0	25.0	 16
591	 19	189.0	37.4	 16
592	 19	120.5	19.1	 16
593	 19	228.0	37.4	 16
594	 19	86.5	12.2	 16
595	 19	74.5	14.2	 16
596	 19	269.0	61.4	 16
597	 19	1103.0	312.1	 16
598	 19	80.3	14.8	 16
599	 19	147.0	25.6	 16
600	 19	90.5	13.1	 16
601	 19	89.0	15.9	 16
602	 19	318.3	49.1	 16
603	 19	127.0	18.2	 16
604	 19	97.8	15.1	 16
605	 19	123.0	20.3	 16
606	 19	106.0	20.8	 16
607	 19	229.3	38.4	 16
608	 19	377.5	56.3	 16
609	 19	108.0	17.6	 16
610	 19	76.3	12.0	 16
611	 19	106.0	28.9	 16
612	 19	81.3	10.6	 16
613	 19	109.8	22.3	 16
614	 19	306.3	69.5	 16
615	 19	504.5	112.7	 16
616	 19	348.0	47.9	 16
617	 19	1105.5	191.9	 16
618	 19	149.3	18.7	 16
619	 19	84.3	26.4	 16
620	 19	85.3	13.0	 16
621	 19	95.0	14.7	 16
622	 19	354.0	72.3	 16
623	 19	113.8	17.6	 16
624	 19	202.8	27.7	 16
625	 19	125.8	13.7	 16
626	 19	126.3	16.8	 16
627	 19	63.0	10.4	 16
628	 19	68.5	7.6	 16
629	 19	123.0	16.7	 16
630	 19	100.0	21.1	 16
631	 19	103.5	10.3	 16
632	 19	129.5	25.8	 20
633	 19	187.5	27.5	 16
634	 19	260.8	31.5	 16
635	 19	312.3	33.7	 16
636	 19	163.5	26.9	 16
637	 19	93.0	13.3	 16
638	 19	85.3	10.2	 16
639	 19	125.0	19.2	 16
640	 19	219.3	23.1	 16
641	 19	817.5	45.0	 16
642	 19	351.8	30.8	 16
643	 19	352.0	31.8	 16
644	 19	233.5	29.7	 16
645	 19	152.3	23.0	 16
646	 19	110.3	17.7	 16
647	 19	279.5	36.4	 16
648	 19	363.8	43.0	 16
649	 19	151.5	25.7	 16
650	 19	177.8	17.5	 16
651	 19	220.5	35.3	 16
652	 19	118.3	23.8	 16
653	 19	133.8	20.0	 16
654	 19	369.3	36.1	 16
655	 19	137.3	20.4	 16
656	 19	91.5	12.0	 16
657	 19	121.3	17.5	 16
658	 19	75.5	14.4	 16
659	 19	89.3	16.9	 16
660	 19	134.8	22.4	 16
661	 19	107.0	17.1	 16
662	 19	155.8	21.6	 16
663	 19	69.3	10.8	 16
664	 19	65.5	11.7	 16
665	 19	88.3	16.1	 16
666	 19	248.3	25.1	 16
667	 19	95.8	18.8	 16
668	 19	64.0	10.7	 16
669	 19	195.3	20.8	 16
670	 19	85.5	13.9	 16
671	 19	148.3	29.5	 16
672	 19	77.0	13.1	 16
673	 19	71.3	10.9	 16
674	 19	94.0	11.5	 16
675	 19	83.8	11.3	 16
676	 19	263.0	26.7	 16
677	 19	146.8	14.7	 16
678	 19	66.3	13.3	 16
679	 19	70.3	10.8	 16
680	 19	61.0	9.5	 16
681	 19	73.5	11.2	 16
682	 19	71.0	12.2	 16
683	 19	539.8	64.6	 16
684	 19	134.0	16.8	 16
685	 19	193.8	68.4	 16
686	 19	71.3	10.3	 16
687	 19	85.5	12.6	 16
688	 19	134.5	28.8	 16
689	 19	143.3	16.3	 16
690	 19	115.5	26.9	 16
691	 19	62.3	10.4	 16
692	 19	234.3	24.2	 16
693	 19	230.8	19.9	 16
694	 19	164.8	24.1	 16
695	 19	155.5	23.8	 16
696	 19	1126.0	210.8	 16
697	 19	73.5	10.4	 16
698	 19	69.0	11.8	 16
699	 19	90.5	14.7	 16
700	 19	85.0	18.6	 16
701	 19	66.0	11.8	 16
702	 19	88.0	11.5	 16
703	 19	75.3	11.3	 16
704	 19	696.3	61.9	 16
705	 19	70.3	13.9	 16
706	 19	69.0	13.3	 16
707	 19	170.0	27.8	 16
708	 19	185.5	19.1	 16
709	 19	203.0	23.3	 16
710	 19	163.0	20.4	 16
711	 19	131.5	18.6	 16
  0	 20	7775.8	698.2	 16
  1	 20	114.3	15.9	 16
  2	 20	99.3	18.1	 16
  3	 20	180.5	24.6	 16
  4	 20	369.5	39.7	 16
  5	 20	87.3	17.3	 16
  6	 20	76.3	15.4	 16
  7	 20	86.0	16.3	 16
  8	 20	86.5	12.0	 16
  9	 20	77.0	12.2	 16
 10	 20	101.5	23.2	 16
 11	 20	76.0	13.1	 16
 12	 20	97.3	14.0	 16
 13	 20	131.3	17.1	 16
 14	 20	167.8	27.3	 16
 15	 20	179.3	30.0	 16
 16	 20	169.0	25.7	 16
 17	 20	183.3	24.1	 16
 18	 20	335.8	42.6	 16
 19	 20	185.0	22.3	 16
 20	 20	122.3	14.3	 16
 21	 20	127.5	18.0	 16
 22	 20	117.3	17.8	 16
 23	 20	88.3	13.0	 16
 24	 20	143.5	34.2	 16
 25	 20	145.8	28.3	 16
 26	 20	73.0	10.7	 16
 27	 20	112.8	21.9	 16
 28	 20	76.5	14.0	 16
 29	 20	76.3	8.8	 16
 30	 20	82.8	12.0	 16
 31	 20	143.0	17.5	 16
 32	 20	101.5	19.5	 16
 33	 20	99.3	14.9	 16
 34	 20	96.0	16.6	 16
 35	 20	358.3	38.2	 16
 36	 20	83.3	11.8	 16
 37	 20	102.3	13.4	 16
 38	 20	259.8	40.8	 16
 39	 20	184.0	25.5	 16
 40	 20	181.5	30.6	 16
 41	 20	78.5	12.9	 16
 42	 20	78.8	17.7	 16
 43	 20	82.5	12.7	 16
 44	 20	168.0	18.9	 16
 45	 20	91.3	14.9	 16
 46	 20	75.3	17.6	 16
 47	 20	108.3	20.3	 16
 48	 20	318.0	47.6	 16
 49	 20	236.8	25.5	 16
 50	 20	93.0	18.3	 16
 51	 20	124.0	24.5	 16
 52	 20	98.5	11.5	 16
 53	 20	308.5	46.6	 16
 54	 20	121.3	17.3	 16
 55	 20	219.3	31.7	 16
 56	 20	173.3	23.0	 16
 57	 20	144.0	11.2	 16
 58	 20	227.8	22.5	 16
 59	 20	228.5	28.7	 16
 60	 20	493.0	47.0	 16
 61	 20	94.5	19.6	 16
 62	 20	258.3	70.8	 16
 63	 20	313.3	39.8	 16
 64	 20	178.5	19.2	 16
 65	 20	135.3	18.8	 16
 66	 20	84.8	19.7	 16
 67	 20	86.3	16.4	 16
 68	 20	89.3	11.9	 16
 69	 20	162.3	23.9	 16
 70	 20	300.8	37.2	 16
 71	 20	176.8	29.3	 16
 72	 20	129.8	22.3	 16
 73	 20	273.0	30.0	 16
 74	 20	127.3	21.7	 16
 75	 20	111.3	15.8	 16
 76	 20	122.5	15.7	 16
 77	 20	210.5	24.4	 16
 78	 20	198.0	22.3	 16
 79	 20	80.0	11.2	 16
 80	 20	87.3	15.4	 16
 81	 20	81.8	12.9	 16
 82	 20	69.5	13.6	 16
 83	 20	242.0	25.8	 16
 84	 20	153.3	25.6	 16
 85	 20	133.0	43.5	 16
 86	 20	92.0	19.1	 16
 87	 20	403.5	63.8	 16
 88	 20	138.0	25.9	 16
 89	 20	112.5	20.5	 16
 90	 20	214.3	26.0	 16
 91	 20	172.5	30.9	 16
 92	 20	82.5	16.7	 16
 93	 20	78.3	9.9	 16
 94	 20	80.0	13.0	 16
 95	 20	92.3	21.6	 16
 96	 20	293.8	34.1	 16
 97	 20	95.0	14.6	 16
 98	 20	208.0	31.2	 16
 99	 20	152.8	17.8	 16
100	 20	126.5	15.6	 16
101	 20	104.8	13.1	 16
102	 20	715.0	70.8	 16
103	 20	429.3	47.9	 16
104	 20	269.5	31.8	 16
105	 20	122.3	18.9	 16
106	 20	114.8	17.3	 16
107	 20	110.0	20.4	 16
108	 20	67.3	10.4	 16
109	 20	96.3	15.3	 16
110	 20	74.8	9.4	 16
111	 20	85.3	13.8	 16
112	 20	101.0	14.9	 16
113	 20	175.0	40.0	 16
114	 20	85.3	13.1	 16
115	 20	75.3	13.3	 16
116	 20	82.5	12.4	 16
117	 20	69.0	11.7	 20
118	 20	75.3	14.8	 16
119	 20	176.3	36.8	 16
120	 20	81.3	11.5	 16
121	 20	70.0	7.7	 16
122	 20	68.0	9.9	 16
123	 20	107.8	13.6	 16
124	 20	75.5	10.5	 16
125	 20	94.5	17.7	 16
126	 20	629.0	90.7	 16
127	 20	625.5	66.1	 16
128	 20	284.3	38.9	 16
129	 20	84.0	10.4	 16
130	 20	80.3	9.9	 16
131	 20	272.5	31.0	 16
132	 20	133.3	21.1	 16
133	 20	72.0	11.5	 16
134	 20	93.0	12.8	 16
135	 20	80.3	13.7	 16
136	 20	81.8	14.8	 16
137	 20	101.0	14.2	 16
138	 20	189.0	27.3	 16
139	 20	119.3	17.5	 16
140	 20	196.3	26.1	 16
141	 20	191.8	28.4	 16
142	 20	81.0	16.5	 16
143	 20	91.3	20.2	 16
144	 20	63.0	10.0	 16
145	 20	92.8	12.2	 16
146	 20	71.3	11.6	 16
147	 20	73.8	11.2	 16
148	 20	71.0	16.6	 16
149	 20	109.5	14.2	 16
150	 20	148.5	22.7	 16
151	 20	144.8	21.4	 16
152	 20	102.3	14.0	 16
153	 20	104.8	17.5	 16
154	 20	243.0	39.7	 16
155	 20	132.0	20.7	 16
156	 20	137.8	38.1	 16
157	 20	172.8	27.3	 16
158	 20	101.3	16.1	 16
159	 20	141.5	19.5	 16
160	 20	185.5	23.0	 16
161	 20	90.0	15.6	 16
162	 20	282.8	35.0	 16
163	 20	760.8	56.7	 16
164	 20	148.0	34.7	 16
165	 20	89.3	17.0	 16
166	 20	151.3	19.6	 16
167	 20	71.0	10.4	 16
168	 20	228.0	31.8	 16
169	 20	88.8	15.4	 16
170	 20	117.3	18.7	 16
171	 20	421.3	35.1	 16
172	 20	150.3	19.7	 16
173	 20	301.0	40.2	 16
174	 20	134.3	19.7	 16
175	 20	86.0	12.3	 16
176	 20	98.8	16.3	 16
177	 20	66.5	15.7	 16
178	 20	179.3	28.5	 16
179	 20	159.3	21.9	 16
180	 20	138.3	17.4	 16
181	 20	87.0	13.9	 16
182	 20	79.8	14.3	 16
183	 20	139.8	24.3	 16
184	 20	104.3	15.9	 16
185	 20	76.8	13.7	 16
186	 20	94.3	17.4	 16
187	 20	165.3	25.6	 16
188	 20	86.8	16.5	 16
189	 20	62.8	9.9	 16
190	 20	74.5	12.4	 16
191	 20	79.0	13.4	 16
192	 20	104.3	11.9	 16
193	 20	128.5	21.7	 16
194	 20	99.5	16.8	 16
195	 20	123.5	16.5	 16
196	 20	73.5	9.6	 16
197	 20	132.3	29.5	 16
198	 20	139.8	15.2	 16
199	 20	146.3	18.1	 16
200	 20	145.8	19.0	 16
201	 20	340.3	29.4	 16
202	 20	260.5	27.9	 16
203	 20	99.3	12.6	 16
204	 20	89.0	18.1	 16
205	 20	102.3	17.5	 16
206	 20	85.0	15.9	 16
207	 20	75.5	12.7	 16
208	 20	189.5	25.8	 16
209	 20	59.8	12.0	 16
210	 20	71.5	14.9	 16
211	 20	101.5	16.8	 16
212	 20	72.0	11.7	 16
213	 20	78.3	17.7	 16
214	 20	76.3	12.8	 16
215	 20	97.0	25.7	 16
216	 20	75.8	15.3	 16
217	 20	78.5	14.5	 16
218	 20	74.5	19.9	 16
219	 20	95.5	16.5	 16
220	 20	75.3	16.0	 16
221	 20	122.3	17.9	 16
222	 20	83.3	12.7	 16
223	 20	68.8	15.2	 16
224	 20	78.5	17.6	 16
225	 20	65.3	11.5	 16
226	 20	67.3	13.1	 16
227	 20	264.8	35.6	 16
228	 20	101.3	18.8	 16
229	 20	225.0	48.5	 16
230	 20	108.8	15.2	 16
231	 20	81.8	11.4	 16
232	 20	70.0	14.7	 16
233	 20	74.3	17.4	 16
234	 20	78.3	10.8	 16
235	 20	182.0	21.6	 16
236	 20	64.3	21.1	 16
237	 20	80.0	16.7	 16
238	 20	596.0	77.0	 16
239	 20	78.0	14.3	 16
240	 20	86.3	13.5	 16
241	 20	80.0	11.8	 16
242	 20	81.0	23.7	 16
243	 20	80.5	15.2	 16
244	 20	129.3	14.6	 16
245	 20	76.0	12.4	 16
246	 20	106.5	19.4	 16
247	 20	70.0	10.6	 16
248	 20	341.0	41.6	 16
249	 20	96.0	12.4	 16
250	 20	73.3	13.0	 16
251	 20	76.5	12.1	 16
252	 20	80.0	18.7	 16
253	 20	70.3	15.5	 16
254	 20	78.8	12.1	 16
255	 20	75.5	11.2	 16
256	 20	66.5	10.8	 16
257	 20	68.3	7.5	 16
258	 20	68.8	13.9	 16
259	 20	115.3	16.7	 16
260	 20	125.0	14.0	 16
261	 20	246.0	25.9	 16
262	 20	183.8	20.3	 16
263	 20	72.3	10.3	 16
264	 20	83.5	12.5	 16
265	 20	114.3	16.2	 16
266	 20	136.3	18.9	 16
267	 20	114.3	22.0	 16
268	 20	130.8	17.2	 16
269	 20	102.8	20.2	 16
270	 20	166.3	22.8	 16
271	 20	668.3	94.2	 16
272	 20	293.0	37.1	 16
273	 20	78.0	11.1	 16
274	 20	79.0	13.0	 16
275	 20	135.5	14.2	 16
276	 20	178.5	24.1	 16
277	 20	72.3	12.9	 16
278	 20	77.3	7.6	 16
279	 20	91.5	15.8	 16
280	 20	94.0	15.5	 16
281	 20	74.3	13.9	 16
282	 20	79.3	16.4	 16
283	 20	80.0	12.0	 16
284	 20	68.3	11.2	 16
285	 20	82.0	11.9	 16
286	 20	70.8	13.0	 16
287	 20	93.0	13.7	 16
288	 20	84.5	12.5	 16
289	 20	85.3	13.3	 16
290	 20	166.3	24.1	 16
291	 20	114.3	18.7	 16
292	 20	83.8	16.0	 16
293	 20	94.5	17.2	 16
294	 20	125.3	21.5	 16
295	 20	80.8	13.1	 20
296	 20	92.0	20.2	 16
297	 20	71.0	8.7	 16
298	 20	89.3	16.3	 16
299	 20	93.5	18.0	 16
300	 20	103.0	29.7	 16
301	 20	80.3	11.0	 16
302	 20	95.3	12.1	 16
303	 20	208.0	30.0	 16
304	 20	165.3	19.9	 16
305	 20	136.0	20.0	 16
306	 20	133.8	27.7	 16
307	 20	96.0	13.1	 16
308	 20	91.0	11.7	 16
309	 20	92.0	14.8	 16
310	 20	103.5	18.6	 16
311	 20	77.3	13.7	 16
312	 20	134.5	15.5	 16
313	 20	71.8	12.1	 16
314	 20	106.3	23.9	 16
315	 20	73.0	12.5	 16
316	 20	76.0	13.8	 16
317	 20	179.8	306.7	 16
318	 20	99.5	23.2	 16
319	 20	84.3	15.4	 16
320	 20	140.0	22.5	 16
321	 20	710.8	61.6	 16
322	 20	184.8	19.7	 16
323	 20	169.0	23.1	 16
324	 20	164.8	22.2	 16
325	 20	74.8	11.2	 16
326	 20	148.3	24.7	 16
327	 20	96.3	13.0	 16
328	 20	69.8	11.2	 16
329	 20	67.5	12.3	 16
330	 20	77.8	14.6	 16
331	 20	91.3	12.7	 16
332	 20	69.5	13.2	 16
333	 20	135.3	20.9	 16
334	 20	166.0	20.3	 16
335	 20	864.3	70.6	 16
336	 20	78.0	13.4	 16
337	 20	66.0	9.4	 16
338	 20	117.8	20.2	 16
339	 20	104.3	16.6	 16
340	 20	120.8	22.6	 16
341	 20	74.3	12.6	 16
342	 20	71.0	10.8	 16
343	 20	73.3	12.3	 16
344	 20	82.3	11.8	 16
345	 20	65.3	10.5	 16
346	 20	75.8	11.9	 16
347	 20	69.5	11.9	 16
348	 20	179.0	18.5	 16
349	 20	82.8	14.6	 16
350	 20	78.3	15.1	 16
351	 20	95.3	8.9	 16
352	 20	86.3	13.5	 16
353	 20	88.8	13.6	 16
354	 20	83.5	14.6	 16
355	 20	122.5	16.0	 16
356	 20	146.5	20.9	 16
357	 20	198.8	18.2	 16
358	 20	688.8	119.7	 16
359	 20	348.3	27.1	 16
360	 20	102.5	17.2	 16
361	 20	103.3	15.2	 16
362	 20	71.0	14.3	 16
363	 20	73.5	15.5	 16
364	 20	128.0	20.0	 16
365	 20	137.3	12.3	 16
366	 20	642.0	52.3	 16
367	 20	122.3	21.4	 16
368	 20	68.8	11.8	 16
369	 20	215.0	26.5	 16
370	 20	80.3	13.1	 16
371	 20	119.3	19.3	 16
372	 20	64.8	9.2	 16
373	 20	88.3	11.2	 16
374	 20	80.3	10.8	 16
375	 20	83.3	13.5	 16
376	 20	84.5	26.3	 16
377	 20	106.8	14.1	 16
378	 20	74.8	8.1	 16
379	 20	69.3	14.1	 16
380	 20	250.3	30.1	 16
381	 20	89.3	15.7	 16
382	 20	74.0	12.0	 16
383	 20	136.8	22.7	 16
384	 20	98.5	13.2	 16
385	 20	113.3	19.4	 16
386	 20	85.3	18.2	 16
387	 20	138.5	22.1	 16
388	 20	86.0	17.0	 16
389	 20	70.3	13.4	 16
390	 20	65.3	8.9	 16
391	 20	72.0	7.8	 16
392	 20	115.8	15.6	 16
393	 20	77.0	14.4	 16
394	 20	85.3	12.2	 16
395	 20	345.3	42.9	 16
396	 20	79.3	14.0	 16
397	 20	74.0	11.0	 16
398	 20	77.0	14.7	 16
399	 20	191.8	15.6	 16
400	 20	202.3	21.3	 16
401	 20	74.3	9.8	 16
402	 20	77.0	10.2	 16
403	 20	89.5	11.6	 16
404	 20	72.8	10.5	 16
405	 20	78.5	7.6	 16
406	 20	66.3	11.8	 12
407	 20	100.3	14.4	 16
408	 20	356.0	58.2	 16
409	 20	957.5	191.0	 16
410	 20	79.8	14.0	 16
411	 20	118.3	29.7	 16
412	 20	352.0	28.2	 16
413	 20	110.0	11.4	 16
414	 20	186.0	18.0	 16
415	 20	101.5	17.4	 16
416	 20	125.3	15.9	 16
417	 20	111.3	15.2	 16
418	 20	112.8	20.3	 16
419	 20	76.3	9.0	 16
420	 20	210.3	28.8	 16
421	 20	63.0	9.5	 16
422	 20	81.0	11.8	 16
423	 20	163.0	28.5	 16
424	 20	265.8	46.0	 16
425	 20	93.3	12.2	 16
426	 20	106.3	11.2	 16
427	 20	119.5	12.5	 16
428	 20	208.0	22.0	 16
429	 20	138.3	23.7	 16
430	 20	74.5	13.5	 16
431	 20	185.3	27.1	 16
432	 20	113.0	17.0	 16
433	 20	104.8	12.0	 16
434	 20	314.0	52.3	 16
435	 20	74.3	13.3	 16
436	 20	126.5	25.1	 16
437	 20	84.5	11.5	 16
438	 20	79.3	12.8	 16
439	 20	71.8	12.2	 16
440	 20	80.0	12.2	 16
441	 20	122.5	21.8	 16
442	 20	152.8	26.4	 16
443	 20	82.3	13.2	 16
444	 20	222.5	30.7	 16
445	 20	170.5	23.7	 16
446	 20	186.3	15.8	 16
447	 20	99.3	16.7	 16
448	 20	106.3	13.0	 16
449	 20	138.0	16.3	 16
450	 20	100.5	10.0	 16
451	 20	115.5	26.2	 16
452	 20	103.3	16.1	 16
453	 20	84.5	14.6	 16
454	 20	72.0	10.7	 16
455	 20	84.0	13.6	 16
456	 20	99.0	13.7	 16
457	 20	81.5	11.1	 16
458	 20	101.8	17.2	 16
459	 20	78.0	9.6	 16
460	 20	71.3	12.2	 16
461	 20	65.5	12.1	 16
462	 20	87.5	15.0	 16
463	 20	115.5	17.2	 16
464	 20	71.0	11.5	 16
465	 20	71.0	11.8	 16
466	 20	69.5	12.4	 16
467	 20	64.3	8.4	 16
468	 20	133.3	29.4	 16
469	 20	85.5	13.2	 16
470	 20	250.0	42.7	 16
471	 20	461.5	46.2	 16
472	 20	85.3	15.7	 16
473	 20	96.0	15.6	 20
474	 20	74.0	21.4	 16
475	 20	102.5	15.2	 16
476	 20	108.5	17.5	 16
477	 20	73.3	13.9	 16
478	 20	86.8	14.5	 16
479	 20	64.3	11.4	 16
480	 20	245.5	38.2	 16
481	 20	81.8	13.1	 16
482	 20	78.3	14.2	 16
483	 20	82.8	19.3	 16
484	 20	65.5	9.9	 16
485	 20	375.5	37.1	 16
486	 20	354.3	26.9	 16
487	 20	326.5	29.6	 16
488	 20	504.5	51.4	 16
489	 20	194.3	22.7	 16
490	 20	82.8	13.1	 16
491	 20	195.5	29.5	 16
492	 20	94.3	14.5	 16
493	 20	148.3	23.3	 16
494	 20	145.5	18.6	 16
495	 20	97.0	18.1	 16
496	 20	182.0	17.9	 16
497	 20	86.8	16.2	 16
498	 20	152.8	24.3	 16
499	 20	89.0	17.2	 16
500	 20	84.8	14.6	 16
501	 20	98.3	16.5	 16
502	 20	81.0	12.5	 16
503	 20	104.5	15.1	 16
504	 20	124.5	25.9	 16
505	 20	93.3	13.1	 16
506	 20	83.8	12.1	 16
507	 20	210.0	31.4	 16
508	 20	88.5	17.1	 16
509	 20	198.8	35.5	 16
510	 20	83.8	10.4	 16
511	 20	166.3	20.4	 16
512	 20	79.0	12.9	 16
513	 20	62.3	8.5	 16
514	 20	73.5	14.6	 16
515	 20	75.0	11.4	 16
516	 20	92.0	11.0	 16
517	 20	99.8	18.8	 16
518	 20	75.3	12.2	 16
519	 20	61.3	8.7	 16
520	 20	64.0	11.2	 16
521	 20	68.3	25.0	 16
522	 20	63.3	7.9	 16
523	 20	137.3	21.7	 16
524	 20	68.3	31.1	 16
525	 20	71.3	13.3	 16
526	 20	84.8	12.5	 16
527	 20	89.0	14.9	 16
528	 20	142.0	25.3	 16
529	 20	409.8	36.1	 16
530	 20	124.3	19.7	 16
531	 20	189.0	32.9	 16
532	 20	111.3	12.9	 16
533	 20	88.8	13.8	 16
534	 20	89.3	16.7	 16
535	 20	73.5	14.8	 16
536	 20	82.8	15.4	 16
537	 20	117.3	20.6	 16
538	 20	88.5	15.1	 16
539	 20	93.0	14.0	 16
540	 20	109.0	13.9	 16
541	 20	78.0	9.0	 16
542	 20	99.0	15.4	 16
543	 20	98.5	14.0	 16
544	 20	84.3	18.0	 16
545	 20	81.8	14.2	 16
546	 20	87.5	15.5	 16
547	 20	95.8	16.5	 16
548	 20	94.0	16.6	 16
549	 20	110.5	11.8	 16
550	 20	90.0	14.8	 16
551	 20	97.8	15.7	 16
552	 20	69.3	11.5	 16
553	 20	129.0	21.8	 16
554	 20	82.3	11.4	 16
555	 20	60.5	7.5	 16
556	 20	94.0	12.1	 16
557	 20	104.8	13.6	 16
558	 20	82.0	10.9	 16
559	 20	171.0	28.0	 16
560	 20	126.0	12.4	 16
561	 20	71.5	12.0	 16
562	 20	84.8	10.4	 16
563	 20	85.0	13.9	 16
564	 20	96.8	14.4	 16
565	 20	63.0	6.3	 16
566	 20	114.3	20.1	 16
567	 20	75.5	10.0	 16
568	 20	354.8	50.3	 16
569	 20	83.3	12.1	 16
570	 20	64.8	14.0	 16
571	 20	124.3	19.3	 16
572	 20	88.0	15.3	 16
573	 20	81.5	11.5	 16
574	 20	109.8	12.7	 16
575	 20	94.3	11.5	 16
576	 20	186.5	24.1	 16
577	 20	78.0	17.0	 16
578	 20	92.0	13.2	 16
579	 20	138.3	14.7	 16
580	 20	305.0	38.3	 16
581	 20	435.8	39.5	 16
582	 20	115.0	15.3	 16
583	 20	99.8	14.7	 16
584	 20	100.5	28.4	 16
585	 20	100.0	16.4	 16
586	 20	319.5	63.8	 16
587	 20	165.5	19.4	 16
588	 20	84.3	12.9	 16
589	 20	69.0	14.1	 16
590	 20	283.0	38.3	 16
591	 20	107.8	16.8	 16
592	 20	124.3	13.5	 16
593	 20	97.3	11.1	 16
594	 20	75.8	16.9	 16
595	 20	105.3	11.7	 16
596	 20	84.3	17.1	 16
597	 20	177.5	45.4	 16
598	 20	74.0	20.7	 16
599	 20	137.5	25.1	 16
600	 20	164.8	31.8	 16
601	 20	173.3	28.8	 16
602	 20	388.0	39.9	 16
603	 20	169.0	20.6	 16
604	 20	85.8	15.4	 16
605	 20	107.3	16.7	 16
606	 20	125.3	18.4	 16
607	 20	192.8	41.7	 16
608	 20	419.3	49.8	 16
609	 20	126.5	29.6	 16
610	 20	82.5	17.5	 16
611	 20	69.8	13.4	 16
612	 20	70.8	9.4	 16
613	 20	76.0	15.1	 16
614	 20	80.8	13.1	 16
615	 20	170.8	31.4	 16
616	 20	207.3	31.7	 16
617	 20	160.0	25.5	 16
618	 20	123.5	16.8	 16
619	 20	80.3	12.2	 16
620	 20	76.5	11.4	 16
621	 20	67.0	11.9	 16
622	 20	94.0	20.4	 16
623	 20	89.3	14.3	 16
624	 20	89.8	14.7	 16
625	 20	105.8	12.2	 16
626	 20	92.3	10.2	 16
627	 20	71.3	9.9	 16
628	 20	64.5	11.0	 16
629	 20	114.3	10.5	 16
630	 20	76.3	12.0	 16
631	 20	167.5	27.9	 16
632	 20	158.3	23.8	 16
633	 20	116.5	19.3	 16
634	 20	100.5	15.8	 16
635	 20	106.8	19.2	 16
636	 20	243.3	29.8	 16
637	 20	101.8	20.5	 16
638	 20	88.3	16.6	 16
639	 20	106.0	16.5	 16
640	 20	146.0	20.4	 16
641	 20	1032.5	131.5	 16
642	 20	414.8	31.8	 16
643	 20	388.5	40.6	 16
644	 20	426.8	58.8	 16
645	 20	167.3	17.2	 16
646	 20	115.3	11.4	 16
647	 20	180.3	22.3	 16
648	 20	345.3	56.0	 16
649	 20	217.0	33.9	 16
650	 20	162.5	22.9	 16
651	 20	270.3	31.3	 20
652	 20	159.0	19.1	 16
653	 20	84.0	10.4	 16
654	 20	107.3	9.3	 16
655	 20	101.8	13.0	 16
656	 20	87.0	17.9	 16
657	 20	98.3	7.5	 16
658	 20	91.3	13.3	 16
659	 20	95.8	16.1	 16
660	 20	83.3	14.1	 16
661	 20	96.8	17.7	 16
662	 20	86.5	18.1	 16
663	 20	63.0	7.1	 16
664	 20	64.3	8.9	 16
665	 20	65.8	14.7	 16
666	 20	138.8	14.1	 16
667	 20	90.3	13.8	 16
668	 20	71.0	9.1	 16
669	 20	103.8	17.9	 16
670	 20	82.5	14.2	 16
671	 20	266.0	26.2	 16
672	 20	83.3	11.3	 16
673	 20	71.3	11.2	 16
674	 20	64.3	9.1	 16
675	 20	71.0	13.1	 16
676	 20	108.5	11.7	 16
677	 20	76.8	12.2	 16
678	 20	71.5	10.2	 16
679	 20	60.3	15.6	 16
680	 20	62.0	9.7	 16
681	 20	62.5	11.0	 16
682	 20	64.8	8.2	 16
683	 20	99.3	16.1	 16
684	 20	86.3	12.2	 16
685	 20	82.8	12.9	 16
686	 20	84.0	12.7	 16
687	 20	62.8	11.8	 16
688	 20	86.8	23.2	 16
689	 20	133.8	22.1	 16
690	 20	93.5	19.3	 16
691	 20	74.3	10.4	 16
692	 20	291.5	30.7	 16
693	 20	292.8	32.9	 16
694	 20	136.5	18.7	 16
695	 20	121.3	12.7	 16
696	 20	126.3	20.4	 16
697	 20	66.5	8.3	 16
698	 20	64.3	11.9	 16
699	 20	80.5	15.9	 16
700	 20	114.3	15.9	 16
701	 20	84.3	20.0	 16
702	 20	95.8	18.8	 16
703	 20	88.5	9.5	 16
704	 20	360.3	37.5	 16
705	 20	66.5	8.3	 16
706	 20	69.5	12.7	 16
707	 20	148.5	19.3	 16
708	 20	91.0	13.2	 16
709	 20	134.3	18.5	 16
710	 20	109.3	18.8	 16
711	 20	438.3	79.5	 16
  0	 21	138.5	20.2	 16
  1	 21	274.8	37.4	 16
  2	 21	398.3	50.9	 16
  3	 21	111.3	15.5	 16
  4	 21	116.8	23.6	 16
  5	 21	98.0	12.5	 16
  6	 21	92.5	15.3	 16
  7	 21	235.5	47.1	 16
  8	 21	214.3	27.7	 16
  9	 21	95.8	11.2	 16
 10	 21	172.3	21.5	 16
 11	 21	110.3	9.3	 16
 12	 21	224.0	37.9	 16
 13	 21	115.0	26.0	 16
 14	 21	174.0	23.6	 16
 15	 21	1296.8	132.9	 16
 16	 21	108.8	18.7	 16
 17	 21	87.8	11.9	 16
 18	 21	106.3	13.3	 16
 19	 21	136.3	18.2	 16
 20	 21	161.3	24.0	 16
 21	 21	122.3	18.8	 16
 22	 21	214.5	33.9	 16
 23	 21	81.3	15.2	 16
 24	 21	156.0	28.2	 16
 25	 21	208.0	33.1	 16
 26	 21	65.3	14.8	 16
 27	 21	129.5	25.5	 16
 28	 21	89.8	14.7	 16
 29	 21	88.3	14.1	 16
 30	 21	246.8	39.3	 16
 31	 21	296.0	33.9	 16
 32	 21	75.0	12.8	 16
 33	 21	655.8	85.1	 16
 34	 21	321.5	45.6	 16
 35	 21	70.8	12.4	 16
 36	 21	76.8	11.3	 16
 37	 21	73.8	12.3	 16
 38	 21	188.5	31.3	 16
 39	 21	152.3	22.3	 16
 40	 21	309.5	33.7	 16
 41	 21	208.8	41.8	 16
 42	 21	73.8	10.4	 16
 43	 21	92.8	11.5	 16
 44	 21	72.8	11.3	 16
 45	 21	73.5	14.7	 16
 46	 21	103.0	19.1	 16
 47	 21	115.0	13.3	 16
 48	 21	170.5	28.3	 16
 49	 21	156.3	29.9	 16
 50	 21	69.5	12.1	 16
 51	 21	243.0	26.7	 16
 52	 21	279.0	47.4	 16
 53	 21	85.0	14.1	 16
 54	 21	124.3	23.2	 16
 55	 21	225.8	34.9	 16
 56	 21	313.8	30.3	 16
 57	 21	358.5	42.1	 16
 58	 21	676.0	38.2	 16
 59	 21	304.0	52.2	 16
 60	 21	99.5	13.9	 16
 61	 21	122.0	21.1	 16
 62	 21	112.0	21.1	 16
 63	 21	272.3	32.2	 16
 64	 21	98.0	19.8	 16
 65	 21	94.8	18.9	 16
 66	 21	107.8	24.3	 16
 67	 21	93.8	17.8	 16
 68	 21	133.5	22.5	 16
 69	 21	311.8	27.4	 16
 70	 21	811.8	131.9	 16
 71	 21	95.5	36.0	 16
 72	 21	104.3	11.5	 16
 73	 21	2705.5	304.2	 16
 74	 21	674.0	71.2	 16
 75	 21	271.0	25.1	 16
 76	 21	101.3	17.7	 16
 77	 21	96.8	17.2	 16
 78	 21	128.0	23.9	 16
 79	 21	88.0	7.2	 16
 80	 21	115.0	16.1	 16
 81	 21	108.0	13.4	 16
 82	 21	134.3	21.2	 16
 83	 21	417.3	58.3	 16
 84	 21	1057.3	87.1	 16
 85	 21	124.3	14.6	 16
 86	 21	143.3	20.3	 16
 87	 21	221.0	38.7	 16
 88	 21	146.8	17.9	 16
 89	 21	113.0	14.0	 16
 90	 21	87.0	14.0	 16
 91	 21	179.3	21.0	 16
 92	 21	212.8	29.4	 16
 93	 21	274.0	22.7	 16
 94	 21	502.0	52.6	 16
 95	 21	615.5	72.1	 16
 96	 21	115.5	14.7	 16
 97	 21	181.5	23.5	 16
 98	 21	126.5	17.9	 16
 99	 21	79.0	14.2	 16
100	 21	150.8	23.8	 16
101	 21	228.3	30.4	 16
102	 21	94.8	19.6	 16
103	 21	85.0	15.2	 16
104	 21	128.3	17.0	 16
105	 21	121.5	15.5	 16
106	 21	133.0	23.2	 16
107	 21	414.3	52.9	 16
108	 21	77.0	10.3	 16
109	 21	221.5	27.1	 16
110	 21	131.0	22.0	 16
111	 21	98.5	10.7	 16
112	 21	1746.3	245.8	 16
113	 21	94.3	17.0	 16
114	 21	76.0	12.8	 16
115	 21	79.0	12.8	 16
116	 21	161.0	39.7	 16
117	 21	91.5	21.1	 16
118	 21	113.3	19.8	 16
119	 21	69.3	9.6	 16
120	 21	127.8	17.9	 16
121	 21	1590.3	254.5	 16
122	 21	1300.8	167.4	 16
123	 21	137.5	11.6	 16
124	 21	173.5	28.6	 16
125	 21	197.5	26.5	 16
126	 21	121.3	21.7	 16
127	 21	87.8	13.2	 16
128	 21	82.5	13.0	 16
129	 21	192.5	26.5	 16
130	 21	112.3	20.9	 16
131	 21	88.5	15.2	 16
132	 21	190.3	24.8	 16
133	 21	324.5	46.2	 16
134	 21	147.0	22.6	 16
135	 21	91.5	14.0	 16
136	 21	233.3	34.3	 20
137	 21	301.0	47.0	 16
138	 21	103.0	14.0	 16
139	 21	379.8	34.0	 16
140	 21	151.5	23.1	 16
141	 21	92.5	19.6	 16
142	 21	173.5	24.2	 16
143	 21	101.0	18.2	 16
144	 21	261.8	30.1	 16
145	 21	95.5	13.7	 16
146	 21	92.0	16.0	 16
147	 21	137.8	22.7	 16
148	 21	98.3	14.0	 16
149	 21	148.0	23.8	 16
150	 21	93.3	9.8	 16
151	 21	166.3	22.6	 16
152	 21	675.0	85.0	 16
153	 21	102.3	15.9	 16
154	 21	151.5	29.7	 16
155	 21	168.0	23.7	 16
156	 21	163.8	26.1	 16
157	 21	528.5	49.4	 16
158	 21	121.5	16.4	 16
159	 21	92.5	18.1	 16
160	 21	673.3	77.1	 16
161	 21	86.8	19.7	 16
162	 21	639.3	85.8	 16
163	 21	98.3	15.9	 16
164	 21	162.0	21.5	 16
165	 21	76.5	12.0	 16
166	 21	70.0	12.1	 16
167	 21	194.5	27.5	 16
168	 21	129.3	19.8	 16
169	 21	210.8	31.8	 16
170	 21	99.3	14.0	 16
171	 21	209.3	16.8	 16
172	 21	222.0	34.0	 16
173	 21	172.0	18.7	 16
174	 21	118.5	21.4	 16
175	 21	129.5	19.0	 16
176	 21	118.8	21.3	 16
177	 21	96.3	17.0	 16
178	 21	94.8	14.3	 16
179	 21	248.0	45.8	 16
180	 21	189.3	22.4	 16
181	 21	75.3	14.2	 16
182	 21	136.8	21.3	 16
183	 21	85.0	13.3	 16
184	 21	85.5	13.2	 16
185	 21	67.8	11.8	 16
186	 21	78.3	12.7	 16
187	 21	81.3	16.8	 16
188	 21	68.0	9.1	 16
189	 21	906.5	144.0	 16
190	 21	122.8	19.5	 16
191	 21	335.0	43.2	 16
192	 21	119.0	19.9	 16
193	 21	112.0	16.1	 16
194	 21	146.5	46.2	 16
195	 21	60.3	8.0	 16
196	 21	233.0	31.6	 16
197	 21	88.0	17.6	 16
198	 21	87.5	17.9	 16
199	 21	270.8	31.0	 16
200	 21	180.0	21.4	 16
201	 21	97.3	13.2	 16
202	 21	81.8	13.1	 16
203	 21	139.3	19.5	 16
204	 21	66.3	10.9	 16
205	 21	95.0	14.1	 16
206	 21	104.0	15.2	 16
207	 21	78.5	13.8	 16
208	 21	230.3	35.7	 16
209	 21	92.5	13.4	 16
210	 21	132.8	22.9	 16
211	 21	64.0	11.8	 16
212	 21	86.5	10.3	 16
213	 21	107.5	15.7	 16
214	 21	124.0	21.4	 16
215	 21	177.3	16.8	 16
216	 21	135.3	23.6	 16
217	 21	93.3	15.9	 16
218	 21	165.0	20.6	 16
219	 21	178.3	20.6	 16
220	 21	219.0	30.6	 16
221	 21	163.3	26.3	 16
222	 21	81.5	13.1	 16
223	 21	66.8	10.2	 16
224	 21	177.0	30.4	 16
225	 21	83.0	15.9	 16
226	 21	64.3	11.9	 16
227	 21	1312.8	202.5	 16
228	 21	105.0	21.6	 16
229	 21	354.0	38.7	 16
230	 21	499.8	79.8	 16
231	 21	452.8	52.2	 16
232	 21	555.8	72.3	 16
233	 21	87.5	14.0	 16
234	 21	143.5	20.1	 16
235	 21	181.0	25.1	 16
236	 21	75.3	11.7	 16
237	 21	88.3	18.9	 16
238	 21	82.3	12.5	 16
239	 21	101.5	20.3	 16
240	 21	92.8	8.9	 16
241	 21	130.5	13.5	 16
242	 21	68.0	10.5	 16
243	 21	429.0	50.3	 16
244	 21	96.3	15.9	 16
245	 21	217.8	39.3	 16
246	 21	142.5	28.4	 16
247	 21	151.0	22.0	 16
248	 21	272.5	37.2	 16
249	 21	197.5	20.5	 16
250	 21	94.3	15.3	 16
251	 21	75.3	11.0	 16
252	 21	74.0	14.4	 16
253	 21	78.3	19.4	 16
254	 21	67.3	7.2	 16
255	 21	93.3	11.4	 16
256	 21	121.5	13.1	 16
257	 21	203.0	26.1	 16
258	 21	148.8	17.4	 16
259	 21	99.5	11.1	 16
260	 21	82.5	14.1	 16
261	 21	80.3	11.2	 16
262	 21	483.0	56.2	 16
263	 21	3233.3	646.0	 16
264	 21	78.5	14.4	 16
265	 21	92.3	24.6	 16
266	 21	147.5	22.7	 16
267	 21	114.0	24.0	 16
268	 21	103.8	17.8	 16
269	 21	237.3	37.4	 16
270	 21	328.0	32.9	 16
271	 21	113.0	19.1	 16
272	 21	98.3	15.5	 16
273	 21	83.0	12.3	 16
274	 21	118.5	15.4	 16
275	 21	275.8	31.3	 16
276	 21	177.5	27.7	 16
277	 21	77.8	12.0	 16
278	 21	113.5	22.4	 16
279	 21	241.3	39.0	 16
280	 21	84.0	12.1	 16
281	 21	118.0	18.0	 16
282	 21	64.0	10.7	 16
283	 21	216.0	38.1	 16
284	 21	72.3	11.7	 16
285	 21	65.0	10.6	 16
286	 21	86.8	19.0	 16
287	 21	150.8	27.9	 16
288	 21	480.8	77.6	 16
289	 21	114.8	24.6	 16
290	 21	109.5	20.4	 16
291	 21	123.8	16.4	 16
292	 21	77.5	15.1	 16
293	 21	305.3	52.8	 16
294	 21	260.3	29.2	 16
295	 21	82.3	13.0	 16
296	 21	142.0	31.7	 16
297	 21	77.0	34.0	 16
298	 21	73.3	13.5	 16
299	 21	138.3	20.4	 16
300	 21	114.3	13.8	 16
301	 21	120.8	11.6	 16
302	 21	292.3	33.0	 16
303	 21	583.3	39.6	 16
304	 21	562.5	60.2	 16
305	 21	1837.8	416.7	 16
306	 21	147.3	17.2	 16
307	 21	93.8	14.5	 16
308	 21	77.3	13.2	 16
309	 21	141.0	17.4	 16
310	 21	156.8	23.8	 16
311	 21	236.3	44.2	 16
312	 21	84.3	13.4	 16
313	 21	245.3	39.0	 16
314	 21	87.0	14.6	 20
315	 21	81.8	13.7	 16
316	 21	96.5	13.7	 16
317	 21	277.5	20.4	 16
318	 21	1004.3	125.5	 16
319	 21	80.8	14.7	 16
320	 21	182.0	22.9	 16
321	 21	849.3	97.5	 16
322	 21	2605.5	356.0	 16
323	 21	511.0	56.5	 16
324	 21	82.5	12.1	 16
325	 21	92.3	13.9	 16
326	 21	207.5	26.6	 16
327	 21	125.3	18.2	 16
328	 21	86.0	13.6	 16
329	 21	188.3	36.4	 16
330	 21	71.0	11.3	 16
331	 21	130.0	22.0	 16
332	 21	274.5	33.5	 16
333	 21	146.5	17.5	 16
334	 21	184.5	25.4	 16
335	 21	241.3	28.3	 16
336	 21	77.0	13.6	 16
337	 21	131.3	14.8	 16
338	 21	142.5	15.8	 16
339	 21	86.0	12.0	 12
340	 21	199.5	23.1	 16
341	 21	952.5	111.4	 16
342	 21	86.5	13.4	 16
343	 21	80.3	9.0	 16
344	 21	153.3	27.7	 16
345	 21	85.3	14.6	 16
346	 21	118.5	23.9	 16
347	 21	103.0	14.6	 16
348	 21	885.0	86.9	 16
349	 21	1003.3	109.3	 16
350	 21	138.5	21.7	 16
351	 21	151.0	24.0	 16
352	 21	109.3	17.9	 16
353	 21	135.3	14.2	 16
354	 21	89.0	10.7	 16
355	 21	3022.0	408.3	 16
356	 21	142.3	18.2	 16
357	 21	478.3	51.9	 16
358	 21	224.3	15.7	 16
359	 21	468.8	36.9	 16
360	 21	480.0	34.4	 16
361	 21	679.0	67.8	 16
362	 21	79.0	9.8	 16
363	 21	180.3	16.1	 16
364	 21	66.0	14.5	 16
365	 21	154.5	18.8	 16
366	 21	178.0	30.2	 16
367	 21	357.3	38.8	 16
368	 21	138.5	17.2	 16
369	 21	270.8	29.6	 16
370	 21	174.0	18.8	 16
371	 21	227.8	25.5	 16
372	 21	139.0	17.0	 16
373	 21	81.3	11.7	 16
374	 21	103.3	12.3	 16
375	 21	204.8	27.8	 16
376	 21	85.3	15.9	 16
377	 21	125.5	21.4	 16
378	 21	116.5	15.8	 16
379	 21	84.5	14.3	 16
380	 21	87.0	9.6	 16
381	 21	76.8	15.4	 16
382	 21	108.5	12.8	 16
383	 21	105.0	18.5	 16
384	 21	69.8	10.7	 16
385	 21	89.3	23.0	 16
386	 21	72.0	13.8	 16
387	 21	125.3	21.0	 16
388	 21	75.3	20.5	 16
389	 21	122.3	13.6	 16
390	 21	87.3	17.9	 16
391	 21	102.3	105.6	 16
392	 21	581.5	95.9	 16
393	 21	720.8	56.6	 16
394	 21	78.3	11.6	 16
395	 21	103.0	22.2	 16
396	 21	461.3	71.8	 16
397	 21	4577.3	892.7	 16
398	 21	166.5	25.2	 16
399	 21	139.5	17.6	 16
400	 21	200.8	24.3	 16
401	 21	97.0	11.2	 16
402	 21	68.0	13.1	 16
403	 21	138.3	17.8	 16
404	 21	106.5	14.7	 16
405	 21	80.3	14.1	 16
406	 21	205.0	40.2	 16
407	 21	192.8	34.3	 16
408	 21	117.5	12.9	 16
409	 21	66.3	14.2	 16
410	 21	69.5	11.6	 16
411	 21	75.5	10.8	 16
412	 21	988.8	176.8	 16
413	 21	117.8	20.1	 16
414	 21	611.3	103.6	 16
415	 21	160.5	23.8	 16
416	 21	101.5	17.1	 16
417	 21	102.3	13.1	 16
418	 21	100.5	13.3	 16
419	 21	95.5	13.2	 16
420	 21	87.0	11.8	 16
421	 21	130.5	24.5	 16
422	 21	108.8	14.3	 16
423	 21	98.0	16.1	 16
424	 21	456.0	66.1	 16
425	 21	208.5	28.3	 16
426	 21	173.5	17.2	 16
427	 21	123.3	16.8	 16
428	 21	135.5	17.9	 16
429	 21	136.3	22.1	 16
430	 21	214.3	35.2	 16
431	 21	108.3	12.0	 16
432	 21	156.0	25.4	 16
433	 21	196.8	18.6	 16
434	 21	207.3	30.5	 16
435	 21	191.0	18.7	 16
436	 21	91.5	15.3	 16
437	 21	95.0	10.5	 16
438	 21	373.3	33.8	 16
439	 21	91.8	15.4	 16
440	 21	112.3	11.6	 16
441	 21	148.5	16.8	 16
442	 21	97.5	18.8	 16
443	 21	91.8	14.5	 16
444	 21	121.5	19.9	 16
445	 21	81.8	12.3	 16
446	 21	158.0	30.8	 16
447	 21	129.0	18.5	 16
448	 21	193.8	28.7	 16
449	 21	3170.3	435.2	 16
450	 21	207.0	20.2	 16
451	 21	180.5	23.6	 16
452	 21	157.8	31.9	 16
453	 21	94.0	12.0	 16
454	 21	118.3	24.6	 16
455	 21	103.0	13.8	 16
456	 21	137.8	23.5	 16
457	 21	118.3	18.8	 16
458	 21	159.3	22.1	 16
459	 21	156.3	21.1	 16
460	 21	346.0	60.9	 16
461	 21	169.5	24.1	 16
462	 21	888.5	137.5	 16
463	 21	297.5	50.7	 16
464	 21	84.3	14.1	 16
465	 21	98.5	23.6	 16
466	 21	139.8	26.5	 16
467	 21	223.0	34.4	 16
468	 21	167.3	27.2	 16
469	 21	130.5	25.8	 16
470	 21	136.3	19.3	 16
471	 21	109.3	24.4	 16
472	 21	89.5	16.9	 16
473	 21	163.3	35.3	 16
474	 21	76.0	10.1	 16
475	 21	83.3	12.1	 16
476	 21	392.0	40.9	 16
477	 21	539.3	51.6	 16
478	 21	255.5	29.5	 16
479	 21	117.5	17.0	 16
480	 21	76.3	11.8	 16
481	 21	70.0	11.3	 16
482	 21	85.3	10.9	 16
483	 21	83.5	13.4	 16
484	 21	85.3	15.5	 16
485	 21	100.3	18.9	 16
486	 21	102.0	20.6	 16
487	 21	207.8	41.9	 16
488	 21	97.3	20.0	 16
489	 21	92.3	17.6	 16
490	 21	280.0	35.3	 16
491	 21	249.5	28.8	 16
492	 21	177.5	26.2	 20
493	 21	112.5	15.5	 16
494	 21	169.3	30.6	 16
495	 21	85.0	26.4	 16
496	 21	118.5	15.8	 16
497	 21	77.3	14.6	 16
498	 21	85.0	13.8	 16
499	 21	134.5	28.7	 16
500	 21	145.3	22.0	 16
501	 21	343.0	50.4	 16
502	 21	176.0	23.9	 16
503	 21	133.3	18.6	 16
504	 21	120.5	19.4	 16
505	 21	393.5	68.4	 16
506	 21	83.3	13.0	 16
507	 21	360.0	40.5	 16
508	 21	120.3	15.5	 16
509	 21	89.3	14.1	 16
510	 21	84.3	11.6	 16
511	 21	2420.8	269.2	 16
512	 21	81.3	15.9	 16
513	 21	64.5	9.9	 16
514	 21	79.3	12.7	 16
515	 21	232.3	35.4	 16
516	 21	206.5	21.6	 16
517	 21	85.8	10.2	 16
518	 21	140.5	15.6	 16
519	 21	80.0	9.2	 16
520	 21	180.5	26.4	 16
521	 21	197.3	34.6	 16
522	 21	219.8	36.0	 16
523	 21	126.8	21.5	 16
524	 21	56.0	11.5	 16
525	 21	75.5	13.9	 16
526	 21	71.3	10.7	 16
527	 21	201.5	19.8	 16
528	 21	174.3	18.5	 16
529	 21	258.0	23.4	 16
530	 21	175.0	18.0	 16
531	 21	104.5	33.3	 16
532	 21	471.8	45.1	 16
533	 21	68.0	8.5	 16
534	 21	85.3	13.4	 16
535	 21	189.0	26.2	 16
536	 21	74.5	12.8	 16
537	 21	121.8	11.0	 16
538	 21	80.5	10.9	 16
539	 21	84.0	11.6	 16
540	 21	76.5	15.0	 16
541	 21	105.3	13.9	 16
542	 21	71.3	11.5	 16
543	 21	341.0	46.3	 16
544	 21	129.3	18.1	 16
545	 21	852.3	109.5	 16
546	 21	957.3	63.1	 16
547	 21	122.3	16.2	 16
548	 21	156.5	19.4	 16
549	 21	90.0	12.0	 16
550	 21	136.3	17.3	 16
551	 21	124.3	19.9	 16
552	 21	161.3	30.0	 16
553	 21	94.8	9.0	 16
554	 21	76.3	11.3	 16
555	 21	75.3	10.9	 16
556	 21	67.3	13.4	 16
557	 21	72.5	11.1	 16
558	 21	72.5	12.0	 16
559	 21	69.0	9.3	 16
560	 21	79.5	10.5	 16
561	 21	90.5	15.9	 16
562	 21	179.3	28.9	 16
563	 21	219.0	30.4	 16
564	 21	206.5	34.7	 16
565	 21	81.3	13.4	 16
566	 21	138.5	32.1	 16
567	 21	64.5	8.8	 16
568	 21	248.0	48.6	 16
569	 21	131.5	17.5	 16
570	 21	73.3	9.0	 16
571	 21	86.8	13.7	 16
572	 21	82.5	12.4	 16
573	 21	97.3	16.1	 16
574	 21	161.5	35.3	 16
575	 21	119.8	18.8	 16
576	 21	146.0	20.5	 16
577	 21	138.5	20.8	 16
578	 21	124.8	21.1	 16
579	 21	164.8	17.1	 16
580	 21	150.3	23.1	 16
581	 21	87.3	14.6	 16
582	 21	92.5	16.2	 16
583	 21	2771.0	575.3	 16
584	 21	125.3	29.8	 16
585	 21	397.3	90.8	 16
586	 21	155.5	29.8	 16
587	 21	83.3	16.0	 16
588	 21	95.8	19.3	 16
589	 21	87.5	17.2	 16
590	 21	111.3	20.3	 16
591	 21	365.0	51.5	 16
592	 21	296.3	28.7	 16
593	 21	172.3	30.3	 16
594	 21	131.5	23.2	 16
595	 21	105.0	10.3	 16
596	 21	139.3	18.2	 16
597	 21	90.8	15.2	 16
598	 21	111.0	13.7	 16
599	 21	178.5	32.4	 16
600	 21	93.0	16.6	 16
601	 21	85.0	12.7	 16
602	 21	229.3	42.6	 16
603	 21	126.5	17.2	 16
604	 21	128.3	26.2	 16
605	 21	121.5	19.5	 16
606	 21	110.3	22.5	 16
607	 21	113.0	20.2	 16
608	 21	118.8	19.1	 16
609	 21	429.3	64.8	 16
610	 21	123.5	16.3	 16
611	 21	92.3	13.6	 16
612	 21	157.3	18.6	 16
613	 21	226.5	23.2	 16
614	 21	200.3	50.8	 16
615	 21	147.5	21.3	 16
616	 21	308.3	39.6	 16
617	 21	141.0	17.9	 16
618	 21	97.3	18.0	 16
619	 21	341.5	133.4	 16
620	 21	139.5	14.3	 16
621	 21	111.0	17.8	 16
622	 21	73.5	10.6	 16
623	 21	119.3	17.0	 16
624	 21	115.8	18.9	 16
625	 21	107.5	16.7	 16
626	 21	253.8	32.0	 16
627	 21	86.3	13.9	 16
628	 21	92.5	16.0	 16
629	 21	98.5	13.4	 16
630	 21	99.8	15.2	 16
631	 21	112.3	16.8	 16
632	 21	266.0	48.9	 16
633	 21	99.8	13.6	 16
634	 21	76.0	11.4	 16
635	 21	682.0	130.4	 16
636	 21	127.0	21.1	 16
637	 21	94.0	18.0	 16
638	 21	614.3	134.0	 16
639	 21	99.3	15.5	 16
640	 21	74.5	11.1	 16
641	 21	252.3	42.2	 16
642	 21	108.5	12.7	 16
643	 21	76.8	10.3	 16
644	 21	86.0	13.7	 16
645	 21	75.5	13.7	 16
646	 21	91.0	10.6	 16
647	 21	100.3	12.2	 16
648	 21	165.8	31.9	 16
649	 21	163.0	23.0	 16
650	 21	141.5	19.5	 16
651	 21	141.3	19.0	 16
652	 21	173.0	19.1	 16
653	 21	170.0	27.9	 16
654	 21	101.0	16.0	 16
655	 21	170.0	29.4	 16
656	 21	1619.8	417.2	 16
657	 21	3808.0	1159.1	 16
658	 21	150.8	36.6	 16
659	 21	84.8	13.0	 16
660	 21	223.8	62.0	 16
661	 21	90.3	12.7	 16
662	 21	1281.8	339.3	 16
663	 21	103.3	29.9	 16
664	 21	398.0	88.5	 16
665	 21	73.8	12.2	 16
666	 21	75.8	14.5	 16
667	 21	67.3	10.5	 16
668	 21	76.5	11.7	 16
669	 21	66.3	14.8	 16
670	 21	63.5	9.6	 20
671	 21	126.0	18.7	 16
672	 21	139.5	20.8	 16
673	 21	172.3	33.1	 16
674	 21	281.3	56.1	 16
675	 21	215.0	30.8	 16
676	 21	232.0	25.7	 16
677	 21	98.3	12.1	 16
678	 21	76.0	10.6	 16
679	 21	174.3	28.5	 16
680	 21	61.3	15.6	 16
681	 21	103.8	22.6	 16
682	 21	210.3	32.3	 16
683	 21	73.0	12.6	 16
684	 21	71.5	15.1	 16
685	 21	67.8	10.0	 16
686	 21	83.0	11.2	 16
687	 21	159.8	18.3	 16
688	 21	130.8	16.6	 16
689	 21	495.0	54.3	 16
690	 21	373.0	69.5	 16
691	 21	156.3	25.8	 16
692	 21	96.8	15.9	 16
693	 21	191.0	21.5	 16
694	 21	184.8	17.6	 16
695	 21	101.0	23.2	 16
696	 21	117.8	16.8	 16
697	 21	125.3	13.7	 16
698	 21	216.5	28.0	 16
699	 21	67.8	10.8	 16
700	 21	394.8	39.2	 16
701	 21	93.3	14.3	 16
702	 21	74.3	12.2	 16
703	 21	98.3	13.9	 16
704	 21	106.0	15.5	 16
705	 21	116.8	12.9	 16
706	 21	300.0	38.7	 16
707	 21	166.0	24.4	 16
708	 21	119.5	28.5	 16
709	 21	145.8	26.0	 16
710	 21	251.8	30.7	 16
711	 21	132.0	12.7	 16
  0	 22	8016.8	715.9	 16
  1	 22	300.3	31.1	 16
  2	 22	99.3	15.0	 16
  3	 22	86.3	25.4	 16
  4	 22	131.5	20.3	 16
  5	 22	63.3	11.5	 16
  6	 22	71.8	12.4	 16
  7	 22	148.8	31.3	 16
  8	 22	148.8	22.1	 16
  9	 22	124.3	13.5	 16
 10	 22	170.8	22.7	 16
 11	 22	135.8	23.5	 16
 12	 22	105.0	13.2	 16
 13	 22	70.8	10.2	 16
 14	 22	147.0	24.4	 16
 15	 22	168.8	26.0	 16
 16	 22	78.8	12.5	 16
 17	 22	151.8	23.3	 16
 18	 22	141.3	16.1	 16
 19	 22	103.5	21.9	 16
 20	 22	72.0	12.4	 16
 21	 22	117.8	18.9	 16
 22	 22	143.5	22.0	 16
 23	 22	72.8	15.5	 16
 24	 22	98.3	22.0	 16
 25	 22	112.0	21.1	 16
 26	 22	76.8	11.2	 16
 27	 22	95.0	15.4	 16
 28	 22	73.3	8.2	 16
 29	 22	78.3	11.6	 16
 30	 22	202.5	33.1	 16
 31	 22	188.8	23.3	 16
 32	 22	77.0	10.8	 16
 33	 22	120.8	14.3	 16
 34	 22	110.0	14.7	 16
 35	 22	78.8	11.9	 16
 36	 22	86.8	20.3	 16
 37	 22	70.8	9.5	 16
 38	 22	123.5	26.7	 16
 39	 22	273.5	38.2	 16
 40	 22	148.0	23.1	 16
 41	 22	173.5	27.4	 16
 42	 22	76.0	12.1	 16
 43	 22	78.3	14.0	 16
 44	 22	75.3	14.3	 16
 45	 22	72.3	11.7	 16
 46	 22	107.3	14.7	 16
 47	 22	78.5	13.7	 16
 48	 22	88.3	15.1	 16
 49	 22	71.5	11.5	 16
 50	 22	69.0	14.3	 16
 51	 22	120.5	16.1	 16
 52	 22	118.8	12.0	 16
 53	 22	80.5	11.4	 16
 54	 22	82.5	14.7	 16
 55	 22	77.5	12.8	 16
 56	 22	121.0	20.6	 16
 57	 22	278.8	32.8	 16
 58	 22	100.0	15.7	 16
 59	 22	137.3	19.0	 16
 60	 22	81.3	15.5	 16
 61	 22	98.8	19.7	 16
 62	 22	78.5	13.7	 16
 63	 22	145.3	25.5	 16
 64	 22	101.0	14.4	 16
 65	 22	76.5	8.9	 16
 66	 22	136.5	22.8	 16
 67	 22	87.5	15.0	 16
 68	 22	238.3	31.3	 16
 69	 22	392.5	45.3	 16
 70	 22	557.5	63.8	 16
 71	 22	74.8	13.0	 16
 72	 22	84.3	14.7	 16
 73	 22	556.3	101.3	 16
 74	 22	150.8	19.8	 16
 75	 22	100.5	21.1	 16
 76	 22	78.3	12.6	 16
 77	 22	84.0	15.4	 16
 78	 22	181.0	27.4	 16
 79	 22	83.8	11.7	 16
 80	 22	130.0	21.6	 16
 81	 22	228.5	31.6	 16
 82	 22	169.5	16.4	 16
 83	 22	154.3	36.7	 16
 84	 22	292.0	38.7	 16
 85	 22	130.5	21.5	 16
 86	 22	125.0	24.7	 16
 87	 22	213.0	29.1	 16
 88	 22	73.8	10.8	 16
 89	 22	169.3	17.3	 16
 90	 22	81.5	11.7	 16
 91	 22	236.5	29.8	 16
 92	 22	320.3	33.5	 16
 93	 22	111.0	15.2	 16
 94	 22	237.5	23.3	 16
 95	 22	259.5	24.9	 16
 96	 22	132.3	18.4	 16
 97	 22	174.0	25.7	 16
 98	 22	81.3	11.0	 16
 99	 22	64.3	11.8	 16
100	 22	97.3	20.6	 16
101	 22	81.0	10.8	 16
102	 22	86.8	12.0	 16
103	 22	71.3	12.7	 16
104	 22	113.5	15.1	 16
105	 22	265.3	33.4	 16
106	 22	315.5	39.3	 16
107	 22	81.3	11.4	 16
108	 22	83.3	15.0	 16
109	 22	218.3	16.9	 16
110	 22	92.3	16.2	 16
111	 22	99.3	15.2	 16
112	 22	200.5	33.6	 16
113	 22	78.5	17.3	 16
114	 22	76.5	11.9	 16
115	 22	83.0	10.7	 16
116	 22	87.5	15.9	 16
117	 22	75.3	14.2	 16
118	 22	77.3	10.6	 16
119	 22	75.5	16.4	 16
120	 22	148.3	24.4	 16
121	 22	311.3	49.2	 16
122	 22	104.0	15.3	 16
123	 22	124.3	20.0	 16
124	 22	95.5	18.3	 16
125	 22	84.8	17.0	 16
126	 22	133.8	25.2	 16
127	 22	74.5	16.4	 16
128	 22	72.8	11.4	 16
129	 22	321.8	36.8	 16
130	 22	91.5	13.7	 16
131	 22	74.0	12.7	 16
132	 22	107.5	17.6	 16
133	 22	195.5	24.3	 16
134	 22	101.8	17.4	 16
135	 22	98.5	11.7	 16
136	 22	143.8	20.1	 16
137	 22	161.5	17.8	 16
138	 22	89.8	14.6	 16
139	 22	127.3	17.2	 16
140	 22	90.8	11.9	 16
141	 22	82.8	14.2	 16
142	 22	108.0	17.7	 16
143	 22	95.0	21.1	 16
144	 22	156.3	29.6	 16
145	 22	101.0	19.1	 16
146	 22	101.8	37.0	 16
147	 22	82.3	14.4	 16
148	 22	81.5	17.5	 16
149	 22	77.8	11.6	 16
150	 22	93.5	15.5	 16
151	 22	93.0	14.7	 16
152	 22	584.0	70.4	 16
153	 22	114.5	17.8	 16
154	 22	86.0	18.1	 20
155	 22	94.0	22.4	 16
156	 22	115.5	18.3	 16
157	 22	102.8	13.2	 16
158	 22	88.5	21.0	 16
159	 22	89.3	14.5	 16
160	 22	233.0	32.8	 16
161	 22	82.8	10.3	 16
162	 22	236.3	28.6	 16
163	 22	73.8	16.2	 16
164	 22	76.3	13.2	 16
165	 22	71.0	13.1	 16
166	 22	69.3	12.2	 16
167	 22	221.0	48.3	 16
168	 22	118.3	21.7	 16
169	 22	90.3	15.4	 16
170	 22	91.8	16.5	 16
171	 22	140.5	19.9	 16
172	 22	100.8	17.8	 16
173	 22	196.8	27.2	 16
174	 22	135.3	21.5	 16
175	 22	79.8	14.6	 16
176	 22	181.3	30.4	 16
177	 22	91.0	8.2	 16
178	 22	107.3	13.8	 16
179	 22	76.3	9.6	 16
180	 22	125.8	20.4	 16
181	 22	78.0	17.1	 16
182	 22	104.3	20.9	 16
183	 22	72.5	13.6	 16
184	 22	67.3	15.5	 16
185	 22	71.8	11.9	 16
186	 22	67.5	11.3	 16
187	 22	83.0	14.8	 16
188	 22	66.5	16.9	 16
189	 22	208.5	34.1	 16
190	 22	88.3	14.9	 16
191	 22	112.5	12.4	 16
192	 22	92.5	16.7	 16
193	 22	97.0	15.1	 16
194	 22	83.3	12.8	 16
195	 22	68.0	13.4	 16
196	 22	110.5	22.2	 16
197	 22	67.0	8.4	 16
198	 22	86.0	13.8	 16
199	 22	283.3	28.3	 16
200	 22	73.5	12.7	 16
201	 22	83.3	16.6	 16
202	 22	71.3	10.2	 16
203	 22	67.0	10.8	 16
204	 22	62.5	15.3	 16
205	 22	74.5	11.1	 16
206	 22	88.5	14.0	 16
207	 22	77.0	11.5	 16
208	 22	162.8	29.6	 16
209	 22	111.5	15.7	 16
210	 22	222.3	22.0	 16
211	 22	70.8	8.6	 16
212	 22	75.5	13.8	 16
213	 22	99.0	9.5	 16
214	 22	129.3	15.1	 16
215	 22	122.5	14.9	 16
216	 22	233.5	32.5	 16
217	 22	86.0	19.0	 16
218	 22	76.3	11.8	 16
219	 22	129.5	15.9	 16
220	 22	108.0	15.1	 16
221	 22	116.3	14.4	 16
222	 22	90.5	20.7	 16
223	 22	77.0	13.1	 16
224	 22	74.8	12.0	 16
225	 22	76.0	12.2	 16
226	 22	66.3	9.5	 16
227	 22	225.8	35.5	 16
228	 22	99.0	13.2	 16
229	 22	253.0	30.8	 16
230	 22	172.0	42.3	 16
231	 22	88.8	12.4	 16
232	 22	86.0	17.7	 16
233	 22	84.3	12.1	 16
234	 22	204.5	24.4	 16
235	 22	140.8	24.3	 16
236	 22	75.8	15.8	 16
237	 22	75.5	12.2	 16
238	 22	71.0	10.6	 16
239	 22	88.5	14.9	 16
240	 22	92.3	14.4	 16
241	 22	116.0	18.8	 16
242	 22	80.3	13.1	 16
243	 22	195.3	23.8	 16
244	 22	111.3	15.4	 16
245	 22	131.5	19.3	 16
246	 22	161.5	20.8	 16
247	 22	102.0	28.0	 16
248	 22	341.3	44.7	 16
249	 22	147.0	23.0	 16
250	 22	77.0	11.1	 16
251	 22	69.0	12.3	 16
252	 22	66.3	14.0	 16
253	 22	72.8	13.8	 16
254	 22	78.5	15.0	 16
255	 22	88.8	12.5	 16
256	 22	124.8	20.3	 16
257	 22	89.5	11.7	 16
258	 22	106.0	17.2	 16
259	 22	81.5	17.1	 16
260	 22	83.3	15.8	 16
261	 22	88.0	16.8	 16
262	 22	202.5	28.9	 16
263	 22	632.8	78.9	 16
264	 22	63.3	9.4	 16
265	 22	81.8	13.1	 16
266	 22	152.3	26.2	 16
267	 22	183.0	27.8	 16
268	 22	174.8	26.0	 16
269	 22	138.8	21.5	 16
270	 22	92.8	13.3	 16
271	 22	76.5	5.6	 16
272	 22	74.8	8.7	 12
273	 22	85.5	12.8	 16
274	 22	106.3	14.5	 16
275	 22	119.8	20.4	 16
276	 22	104.3	18.9	 16
277	 22	76.3	11.5	 16
278	 22	75.8	12.7	 16
279	 22	83.5	12.5	 16
280	 22	84.3	16.8	 16
281	 22	84.3	13.6	 16
282	 22	71.3	13.7	 16
283	 22	75.5	11.3	 16
284	 22	72.3	10.9	 16
285	 22	66.0	13.0	 16
286	 22	69.0	12.5	 16
287	 22	109.3	21.9	 16
288	 22	189.0	32.4	 16
289	 22	113.8	18.2	 16
290	 22	119.8	15.3	 16
291	 22	98.8	15.4	 16
292	 22	121.8	20.2	 16
293	 22	163.8	22.1	 16
294	 22	146.3	19.6	 16
295	 22	82.8	16.5	 16
296	 22	103.5	8.9	 16
297	 22	83.5	17.5	 16
298	 22	86.8	16.6	 16
299	 22	98.5	24.1	 16
300	 22	94.0	15.5	 16
301	 22	107.0	13.5	 16
302	 22	685.3	70.6	 16
303	 22	232.3	20.0	 16
304	 22	389.3	37.0	 16
305	 22	386.8	60.3	 16
306	 22	119.3	18.4	 16
307	 22	110.8	20.9	 16
308	 22	80.5	14.9	 16
309	 22	125.3	20.9	 16
310	 22	130.8	18.1	 16
311	 22	114.5	20.0	 16
312	 22	84.3	9.4	 16
313	 22	162.3	26.4	 16
314	 22	80.3	17.8	 16
315	 22	85.8	13.1	 16
316	 22	90.3	17.0	 16
317	 22	766.0	93.8	 16
318	 22	309.3	41.4	 16
319	 22	100.0	14.9	 16
320	 22	113.0	17.2	 16
321	 22	143.3	18.3	 16
322	 22	342.3	68.6	 16
323	 22	120.0	27.2	 16
324	 22	93.0	16.1	 16
325	 22	96.5	12.7	 16
326	 22	77.5	14.1	 16
327	 22	89.0	19.7	 16
328	 22	85.3	15.5	 16
329	 22	69.0	11.8	 16
330	 22	69.5	11.3	 16
331	 22	88.8	14.3	 16
332	 22	135.0	25.0	 20
333	 22	95.0	13.7	 16
334	 22	119.5	19.4	 16
335	 22	624.5	76.1	 16
336	 22	72.5	10.6	 16
337	 22	148.8	32.2	 16
338	 22	431.3	51.3	 16
339	 22	87.3	17.1	 16
340	 22	210.8	33.9	 16
341	 22	181.3	20.4	 16
342	 22	148.3	21.3	 16
343	 22	89.8	15.4	 16
344	 22	97.8	12.1	 16
345	 22	91.3	11.5	 16
346	 22	83.0	14.0	 16
347	 22	98.3	14.3	 16
348	 22	216.8	35.7	 16
349	 22	246.3	48.2	 16
350	 22	85.0	14.7	 16
351	 22	87.5	12.2	 16
352	 22	82.3	10.8	 16
353	 22	98.0	19.5	 16
354	 22	107.5	12.7	 16
355	 22	580.0	63.5	 16
356	 22	129.0	19.8	 16
357	 22	675.0	74.4	 16
358	 22	262.0	24.3	 16
359	 22	266.3	30.7	 16
360	 22	306.3	46.1	 16
361	 22	177.8	26.5	 16
362	 22	90.0	10.8	 16
363	 22	88.8	14.3	 16
364	 22	81.3	10.8	 16
365	 22	118.5	17.1	 16
366	 22	100.0	14.8	 16
367	 22	124.5	11.7	 16
368	 22	188.0	24.1	 16
369	 22	91.3	14.6	 16
370	 22	124.0	16.5	 16
371	 22	157.0	18.6	 16
372	 22	107.5	15.7	 16
373	 22	66.0	15.4	 16
374	 22	115.0	27.7	 16
375	 22	80.5	13.7	 16
376	 22	97.0	8.9	 16
377	 22	148.3	22.3	 16
378	 22	126.0	27.2	 16
379	 22	80.8	11.7	 16
380	 22	96.3	15.1	 16
381	 22	79.5	14.0	 16
382	 22	66.3	10.1	 16
383	 22	82.3	14.2	 16
384	 22	68.8	12.3	 16
385	 22	75.0	17.2	 16
386	 22	72.8	15.2	 16
387	 22	83.3	16.3	 16
388	 22	101.3	13.9	 16
389	 22	109.8	18.8	 16
390	 22	84.5	17.0	 16
391	 22	68.5	10.0	 16
392	 22	101.5	13.1	 16
393	 22	107.0	12.2	 16
394	 22	69.3	11.3	 16
395	 22	127.5	25.1	 16
396	 22	118.5	12.0	 16
397	 22	186.3	37.8	 16
398	 22	91.3	13.5	 16
399	 22	104.3	17.2	 16
400	 22	94.3	12.2	 16
401	 22	80.3	11.1	 16
402	 22	76.5	11.3	 16
403	 22	80.3	16.9	 16
404	 22	148.5	16.7	 16
405	 22	77.3	9.6	 16
406	 22	114.3	19.2	 16
407	 22	136.0	15.8	 16
408	 22	96.3	8.7	 16
409	 22	82.5	14.7	 16
410	 22	75.0	13.9	 16
411	 22	75.3	12.7	 16
412	 22	236.8	25.9	 16
413	 22	87.8	13.4	 16
414	 22	106.8	20.9	 16
415	 22	71.5	12.8	 16
416	 22	73.3	9.5	 16
417	 22	111.0	22.0	 16
418	 22	101.8	18.9	 16
419	 22	100.5	14.1	 16
420	 22	89.8	17.9	 16
421	 22	208.0	36.6	 16
422	 22	94.3	17.7	 16
423	 22	113.3	20.4	 16
424	 22	302.0	43.1	 16
425	 22	118.8	17.8	 16
426	 22	148.0	17.7	 16
427	 22	127.3	15.4	 16
428	 22	399.8	38.2	 16
429	 22	187.3	19.0	 16
430	 22	155.8	16.6	 16
431	 22	90.3	12.5	 16
432	 22	147.5	16.1	 16
433	 22	313.3	32.5	 16
434	 22	345.5	41.1	 16
435	 22	301.3	28.9	 16
436	 22	97.0	18.0	 16
437	 22	87.0	14.0	 16
438	 22	85.3	19.1	 16
439	 22	103.3	36.4	 16
440	 22	101.5	12.7	 16
441	 22	189.3	26.3	 16
442	 22	97.5	16.0	 16
443	 22	86.5	18.0	 16
444	 22	98.0	12.2	 16
445	 22	70.0	13.9	 16
446	 22	76.5	13.0	 16
447	 22	103.5	15.2	 16
448	 22	239.8	33.2	 16
449	 22	826.3	120.2	 16
450	 22	140.0	21.2	 16
451	 22	201.8	24.2	 16
452	 22	99.0	11.9	 16
453	 22	90.5	14.5	 16
454	 22	95.3	13.2	 16
455	 22	100.3	19.0	 16
456	 22	140.8	16.1	 16
457	 22	143.3	18.3	 16
458	 22	160.3	20.4	 16
459	 22	126.3	20.5	 16
460	 22	136.3	20.9	 16
461	 22	442.3	50.9	 16
462	 22	391.0	41.8	 16
463	 22	154.0	30.6	 16
464	 22	66.3	12.1	 16
465	 22	83.8	15.9	 16
466	 22	81.3	13.7	 16
467	 22	71.5	10.4	 16
468	 22	167.5	25.2	 16
469	 22	117.5	16.7	 16
470	 22	150.5	17.0	 16
471	 22	68.3	18.8	 16
472	 22	109.5	19.2	 16
473	 22	85.8	13.2	 16
474	 22	68.5	9.0	 16
475	 22	77.5	14.6	 16
476	 22	176.3	49.9	 16
477	 22	349.8	31.4	 16
478	 22	112.3	15.3	 16
479	 22	160.0	22.0	 16
480	 22	81.3	14.0	 16
481	 22	70.5	13.1	 16
482	 22	73.8	14.0	 16
483	 22	70.5	15.3	 16
484	 22	66.0	10.9	 16
485	 22	70.8	12.1	 16
486	 22	163.8	19.2	 16
487	 22	224.3	25.0	 16
488	 22	100.8	17.4	 16
489	 22	79.3	11.2	 16
490	 22	202.0	23.2	 16
491	 22	251.3	26.7	 16
492	 22	147.3	22.3	 16
493	 22	101.3	14.3	 16
494	 22	195.8	18.8	 16
495	 22	82.8	14.4	 16
496	 22	203.5	30.1	 16
497	 22	79.0	17.4	 16
498	 22	98.8	16.8	 16
499	 22	124.5	18.5	 16
500	 22	126.0	17.9	 16
501	 22	92.5	16.2	 16
502	 22	168.8	20.0	 16
503	 22	96.5	17.7	 16
504	 22	123.5	24.3	 16
505	 22	203.8	30.1	 16
506	 22	102.0	15.4	 16
507	 22	118.8	18.6	 16
508	 22	90.3	10.5	 16
509	 22	83.8	16.0	 16
510	 22	94.3	12.4	 20
511	 22	268.5	55.7	 16
512	 22	93.0	13.7	 16
513	 22	70.8	10.6	 16
514	 22	78.5	10.6	 16
515	 22	116.3	22.3	 16
516	 22	93.8	11.5	 16
517	 22	78.0	17.2	 16
518	 22	81.8	12.3	 16
519	 22	78.3	9.6	 16
520	 22	81.0	11.9	 16
521	 22	75.5	14.4	 16
522	 22	81.0	12.2	 16
523	 22	105.3	18.0	 16
524	 22	68.0	12.8	 16
525	 22	85.3	13.7	 16
526	 22	65.8	9.3	 16
527	 22	155.0	22.0	 16
528	 22	99.8	18.3	 16
529	 22	170.5	21.7	 16
530	 22	140.0	23.5	 16
531	 22	100.5	17.1	 16
532	 22	130.8	20.3	 16
533	 22	87.5	13.0	 16
534	 22	68.3	12.5	 16
535	 22	92.3	21.0	 16
536	 22	76.8	13.9	 16
537	 22	143.0	16.0	 16
538	 22	83.8	13.6	 16
539	 22	74.5	15.2	 16
540	 22	72.5	9.3	 16
541	 22	81.3	12.3	 16
542	 22	77.3	11.7	 16
543	 22	216.3	22.6	 16
544	 22	202.3	24.1	 16
545	 22	417.0	51.7	 16
546	 22	454.3	38.9	 16
547	 22	88.0	12.2	 16
548	 22	112.3	9.6	 16
549	 22	117.5	14.3	 16
550	 22	143.0	19.0	 16
551	 22	80.8	16.8	 16
552	 22	227.5	21.2	 16
553	 22	94.8	17.6	 16
554	 22	62.3	10.3	 16
555	 22	75.5	12.3	 16
556	 22	72.3	12.8	 16
557	 22	75.3	15.1	 16
558	 22	65.8	6.5	 16
559	 22	96.8	24.3	 16
560	 22	89.5	13.1	 16
561	 22	80.0	25.7	 16
562	 22	137.3	16.8	 16
563	 22	151.0	20.4	 16
564	 22	139.5	15.6	 16
565	 22	75.3	15.8	 16
566	 22	66.8	10.0	 16
567	 22	63.3	10.8	 16
568	 22	83.8	12.1	 16
569	 22	76.5	11.5	 16
570	 22	71.3	10.5	 16
571	 22	71.3	15.7	 16
572	 22	77.5	9.6	 16
573	 22	96.8	12.2	 16
574	 22	82.3	8.4	 16
575	 22	114.5	10.5	 16
576	 22	171.3	25.7	 16
577	 22	114.0	14.8	 16
578	 22	94.0	17.8	 16
579	 22	141.3	18.5	 16
580	 22	146.3	23.0	 16
581	 22	92.5	17.0	 16
582	 22	82.0	16.2	 16
583	 22	445.0	82.1	 16
584	 22	105.8	14.2	 16
585	 22	184.3	25.6	 16
586	 22	98.0	13.6	 16
587	 22	86.3	14.2	 16
588	 22	79.3	10.5	 16
589	 22	108.8	15.9	 16
590	 22	119.5	16.6	 16
591	 22	175.5	25.1	 16
592	 22	451.5	30.7	 16
593	 22	111.3	11.8	 16
594	 22	92.8	15.7	 16
595	 22	89.3	17.3	 16
596	 22	81.0	11.2	 16
597	 22	75.5	12.5	 16
598	 22	82.3	16.1	 16
599	 22	114.5	18.1	 16
600	 22	94.5	18.0	 16
601	 22	80.3	13.8	 16
602	 22	102.5	15.5	 16
603	 22	100.3	16.0	 16
604	 22	100.0	17.3	 16
605	 22	132.5	17.0	 16
606	 22	102.0	9.1	 16
607	 22	253.3	43.5	 16
608	 22	107.0	15.7	 16
609	 22	108.8	14.3	 16
610	 22	111.0	14.4	 16
611	 22	107.5	20.7	 16
612	 22	107.5	12.0	 16
613	 22	169.8	19.4	 16
614	 22	182.8	27.4	 16
615	 22	281.0	30.6	 16
616	 22	515.3	55.8	 16
617	 22	121.3	17.3	 16
618	 22	79.5	14.5	 16
619	 22	129.3	18.0	 16
620	 22	76.3	14.1	 16
621	 22	97.3	14.7	 16
622	 22	79.3	14.3	 16
623	 22	109.8	14.3	 16
624	 22	70.0	11.8	 16
625	 22	95.8	10.7	 16
626	 22	102.0	13.2	 16
627	 22	93.8	26.1	 16
628	 22	77.3	10.5	 16
629	 22	89.3	10.7	 16
630	 22	183.8	29.0	 16
631	 22	235.3	30.3	 16
632	 22	229.3	27.4	 16
633	 22	96.5	12.2	 16
634	 22	62.3	10.1	 16
635	 22	108.8	16.9	 16
636	 22	105.0	14.0	 16
637	 22	93.0	15.4	 16
638	 22	143.8	25.2	 16
639	 22	85.8	16.7	 16
640	 22	92.3	17.0	 16
641	 22	164.5	22.3	 16
642	 22	102.3	13.1	 16
643	 22	91.3	15.2	 16
644	 22	76.3	15.3	 16
645	 22	63.5	11.7	 16
646	 22	69.8	9.4	 16
647	 22	107.5	16.4	 16
648	 22	118.8	15.3	 16
649	 22	125.0	22.6	 16
650	 22	134.3	21.0	 16
651	 22	108.8	11.0	 16
652	 22	146.0	18.3	 16
653	 22	137.0	20.1	 16
654	 22	106.5	19.0	 16
655	 22	122.5	22.5	 16
656	 22	399.3	92.6	 16
657	 22	450.8	119.0	 16
658	 22	110.8	18.3	 16
659	 22	82.0	15.2	 16
660	 22	112.5	12.9	 16
661	 22	101.0	16.6	 16
662	 22	443.8	77.7	 16
663	 22	91.0	16.3	 16
664	 22	223.0	31.5	 16
665	 22	74.3	15.8	 16
666	 22	68.0	8.7	 16
667	 22	64.5	9.8	 16
668	 22	73.5	9.3	 16
669	 22	66.8	11.5	 16
670	 22	74.8	12.2	 16
671	 22	83.3	14.3	 16
672	 22	119.0	24.1	 16
673	 22	96.8	16.4	 16
674	 22	157.8	22.4	 16
675	 22	95.5	18.0	 16
676	 22	100.5	18.9	 16
677	 22	88.5	16.8	 16
678	 22	68.8	13.2	 16
679	 22	85.8	15.1	 16
680	 22	63.0	7.4	 16
681	 22	118.3	17.3	 16
682	 22	143.3	19.2	 16
683	 22	72.5	16.7	 16
684	 22	65.8	10.2	 16
685	 22	72.3	12.6	 16
686	 22	81.0	13.7	 16
687	 22	139.0	23.3	 16
688	 22	88.3	11.3	 20
689	 22	160.3	21.1	 16
690	 22	228.5	30.2	 16
691	 22	109.3	8.3	 16
692	 22	80.8	12.9	 16
693	 22	159.0	19.0	 16
694	 22	168.5	20.1	 16
695	 22	96.3	17.2	 16
696	 22	122.8	17.6	 16
697	 22	113.3	22.9	 16
698	 22	72.8	12.4	 16
699	 22	70.0	11.0	 16
700	 22	143.0	20.6	 16
701	 22	108.0	18.2	 16
702	 22	77.0	10.1	 16
703	 22	78.8	11.7	 16
704	 22	103.5	18.5	 16
705	 22	328.8	35.8	 16
706	 22	139.3	21.9	 16
707	 22	108.0	19.1	 16
708	 22	263.8	35.8	 16
709	 22	238.3	34.8	 16
710	 22	123.0	18.2	 16
711	 22	454.8	55.6	 16
  0	 23	134.0	19.7	 16
  1	 23	163.3	16.5	 16
  2	 23	111.8	20.9	 16
  3	 23	145.5	18.5	 16
  4	 23	1046.8	110.1	 16
  5	 23	70.0	15.9	 16
  6	 23	141.3	16.0	 16
  7	 23	169.3	22.1	 16
  8	 23	135.8	25.5	 16
  9	 23	99.0	15.8	 16
 10	 23	108.5	57.7	 16
 11	 23	149.8	20.3	 16
 12	 23	103.5	13.1	 16
 13	 23	145.5	23.9	 16
 14	 23	102.3	15.3	 16
 15	 23	99.5	12.9	 16
 16	 23	116.0	14.9	 16
 17	 23	115.8	19.7	 16
 18	 23	99.3	17.6	 16
 19	 23	164.3	21.8	 16
 20	 23	106.3	15.5	 16
 21	 23	65.8	14.2	 16
 22	 23	151.8	28.0	 16
 23	 23	220.5	27.2	 16
 24	 23	429.3	57.9	 16
 25	 23	312.8	51.2	 16
 26	 23	114.3	16.2	 16
 27	 23	97.0	14.1	 16
 28	 23	75.8	12.3	 16
 29	 23	91.3	15.0	 16
 30	 23	180.5	27.8	 16
 31	 23	135.3	16.0	 16
 32	 23	466.5	69.5	 16
 33	 23	292.8	45.4	 16
 34	 23	85.0	15.0	 16
 35	 23	132.5	16.2	 16
 36	 23	112.5	18.1	 16
 37	 23	109.5	19.5	 16
 38	 23	69.5	5.4	 16
 39	 23	181.5	36.0	 16
 40	 23	109.0	18.2	 16
 41	 23	93.3	13.4	 16
 42	 23	78.5	12.1	 16
 43	 23	67.8	7.8	 16
 44	 23	272.0	32.9	 16
 45	 23	224.3	31.2	 16
 46	 23	133.0	19.5	 16
 47	 23	103.3	17.0	 16
 48	 23	122.5	14.6	 16
 49	 23	106.0	12.9	 16
 50	 23	76.0	11.7	 16
 51	 23	209.3	33.9	 16
 52	 23	394.5	41.9	 16
 53	 23	359.8	42.5	 16
 54	 23	226.5	35.0	 16
 55	 23	236.5	23.7	 16
 56	 23	105.5	13.7	 16
 57	 23	122.8	17.3	 16
 58	 23	105.3	15.4	 16
 59	 23	110.0	24.5	 16
 60	 23	138.0	16.4	 16
 61	 23	130.3	19.5	 16
 62	 23	183.0	25.6	 16
 63	 23	103.8	13.2	 16
 64	 23	390.0	48.9	 16
 65	 23	118.3	16.4	 16
 66	 23	77.5	10.2	 16
 67	 23	92.3	16.3	 16
 68	 23	77.5	14.7	 16
 69	 23	109.8	22.1	 16
 70	 23	170.3	14.6	 16
 71	 23	78.0	14.1	 16
 72	 23	88.5	17.6	 16
 73	 23	174.3	17.9	 16
 74	 23	111.8	12.6	 16
 75	 23	167.0	23.1	 16
 76	 23	161.5	21.6	 16
 77	 23	68.8	9.5	 16
 78	 23	71.3	11.8	 16
 79	 23	136.5	25.3	 16
 80	 23	98.3	17.8	 16
 81	 23	83.5	15.1	 16
 82	 23	88.3	15.5	 16
 83	 23	86.3	15.6	 16
 84	 23	93.0	24.1	 16
 85	 23	113.0	15.7	 16
 86	 23	70.8	11.8	 16
 87	 23	248.8	33.2	 16
 88	 23	244.0	30.0	 16
 89	 23	127.8	16.4	 16
 90	 23	88.8	14.0	 16
 91	 23	198.0	33.0	 16
 92	 23	219.8	26.4	 16
 93	 23	449.3	38.4	 16
 94	 23	177.0	24.2	 16
 95	 23	97.0	15.2	 16
 96	 23	112.8	24.6	 16
 97	 23	108.3	17.1	 16
 98	 23	107.8	12.5	 16
 99	 23	159.0	20.2	 16
100	 23	101.8	15.2	 16
101	 23	121.8	21.9	 16
102	 23	173.5	32.3	 16
103	 23	89.5	13.7	 16
104	 23	224.0	28.6	 16
105	 23	248.0	26.5	 16
106	 23	249.8	37.7	 16
107	 23	84.3	11.0	 16
108	 23	352.3	24.1	 16
109	 23	64.3	8.8	 16
110	 23	79.5	12.6	 16
111	 23	416.3	62.7	 16
112	 23	312.8	47.9	 16
113	 23	84.3	12.1	 16
114	 23	75.3	9.9	 16
115	 23	192.3	19.6	 16
116	 23	73.3	10.1	 16
117	 23	116.8	17.4	 16
118	 23	119.3	23.4	 16
119	 23	68.5	12.2	 16
120	 23	95.5	13.0	 16
121	 23	237.8	36.6	 16
122	 23	97.8	16.7	 16
123	 23	307.5	34.1	 16
124	 23	102.3	14.3	 16
125	 23	192.0	30.1	 16
126	 23	96.3	12.1	 16
127	 23	140.8	18.9	 16
128	 23	169.5	28.5	 16
129	 23	165.3	25.0	 16
130	 23	121.8	19.3	 16
131	 23	151.5	22.2	 16
132	 23	352.5	36.2	 16
133	 23	1270.3	167.3	 16
134	 23	318.3	39.1	 16
135	 23	191.3	31.1	 16
136	 23	681.8	86.8	 16
137	 23	117.0	19.5	 16
138	 23	207.0	28.4	 16
139	 23	157.0	21.1	 16
140	 23	82.3	15.5	 16
141	 23	71.8	14.3	 16
142	 23	82.3	11.6	 16
143	 23	71.8	13.6	 16
144	 23	151.3	25.2	 16
145	 23	114.0	20.6	 16
146	 23	257.0	40.6	 16
147	 23	78.0	15.4	 16
148	 23	109.3	21.6	 16
149	 23	139.0	23.6	 16
150	 23	75.8	17.0	 16
151	 23	95.0	15.9	 16
152	 23	102.3	21.8	 16
153	 23	133.8	18.4	 16
154	 23	102.3	16.6	 16
155	 23	147.3	26.5	 16
156	 23	209.8	31.9	 16
157	 23	101.3	17.3	 16
158	 23	292.0	44.3	 16
159	 23	158.3	23.2	 16
160	 23	898.8	156.9	 16
161	 23	904.5	153.7	 16
162	 23	78.0	11.2	 16
163	 23	86.0	15.1	 16
164	 23	420.0	89.2	 16
165	 23	80.0	11.8	 16
166	 23	67.5	5.2	 16
167	 23	141.0	20.2	 16
168	 23	94.0	21.1	 16
169	 23	192.3	27.6	 16
170	 23	174.0	26.7	 16
171	 23	67.5	10.5	 16
172	 23	209.8	34.5	 16
173	 23	138.3	22.4	 20
174	 23	218.3	23.7	 16
175	 23	123.8	17.4	 16
176	 23	146.5	26.7	 16
177	 23	129.3	22.6	 16
178	 23	128.5	20.7	 16
179	 23	157.3	29.5	 16
180	 23	146.8	23.1	 16
181	 23	178.3	27.1	 16
182	 23	194.3	29.5	 16
183	 23	91.8	11.9	 16
184	 23	144.3	24.0	 16
185	 23	107.3	21.6	 16
186	 23	85.8	15.3	 16
187	 23	130.8	31.4	 16
188	 23	276.5	45.3	 16
189	 23	199.0	27.4	 16
190	 23	162.5	20.4	 16
191	 23	155.5	19.2	 16
192	 23	117.3	14.8	 16
193	 23	116.5	21.6	 16
194	 23	108.0	21.3	 16
195	 23	94.8	14.7	 16
196	 23	270.5	46.8	 16
197	 23	85.0	11.2	 16
198	 23	95.0	12.8	 16
199	 23	75.3	9.3	 16
200	 23	203.0	28.6	 16
201	 23	79.0	13.9	 16
202	 23	84.3	15.8	 16
203	 23	319.3	46.7	 16
204	 23	129.5	22.0	 16
205	 23	143.3	12.3	 12
206	 23	207.0	31.3	 16
207	 23	78.3	11.2	 16
208	 23	105.8	14.2	 16
209	 23	163.3	23.0	 16
210	 23	300.3	37.4	 16
211	 23	535.5	56.3	 16
212	 23	132.3	21.1	 16
213	 23	911.5	141.1	 16
214	 23	162.3	23.0	 16
215	 23	622.0	75.9	 16
216	 23	172.3	28.2	 16
217	 23	104.0	18.3	 16
218	 23	79.3	11.2	 16
219	 23	690.8	120.5	 16
220	 23	103.5	15.1	 16
221	 23	106.8	14.5	 16
222	 23	151.5	32.3	 16
223	 23	71.8	12.7	 16
224	 23	316.3	43.7	 16
225	 23	175.0	21.7	 16
226	 23	108.0	19.1	 16
227	 23	119.3	17.9	 16
228	 23	114.5	16.2	 16
229	 23	132.8	19.1	 16
230	 23	138.0	17.4	 16
231	 23	383.0	51.2	 16
232	 23	377.0	36.8	 16
233	 23	197.8	26.0	 16
234	 23	87.5	14.4	 16
235	 23	576.8	44.9	 16
236	 23	116.3	17.9	 16
237	 23	70.3	11.2	 16
238	 23	77.3	14.6	 16
239	 23	385.0	39.8	 16
240	 23	134.0	22.4	 16
241	 23	137.3	22.2	 16
242	 23	87.5	17.7	 16
243	 23	88.3	10.1	 16
244	 23	212.8	27.1	 16
245	 23	158.8	18.7	 16
246	 23	76.0	11.2	 16
247	 23	74.0	14.5	 16
248	 23	147.3	25.4	 16
249	 23	150.8	20.5	 16
250	 23	107.0	20.0	 16
251	 23	65.8	10.4	 16
252	 23	136.3	19.9	 16
253	 23	75.5	12.0	 16
254	 23	71.5	9.7	 16
255	 23	80.5	12.4	 16
256	 23	185.3	21.4	 16
257	 23	102.3	14.8	 16
258	 23	176.3	29.8	 16
259	 23	242.5	32.9	 16
260	 23	1284.5	103.2	 16
261	 23	1366.8	111.6	 16
262	 23	1363.5	115.4	 16
263	 23	97.5	24.8	 16
264	 23	75.8	11.2	 16
265	 23	60.5	11.6	 16
266	 23	149.8	26.2	 16
267	 23	94.3	18.3	 16
268	 23	131.5	21.8	 16
269	 23	127.0	17.0	 16
270	 23	168.8	21.6	 16
271	 23	118.8	37.9	 16
272	 23	476.8	78.7	 16
273	 23	5379.5	493.4	 16
274	 23	84.0	18.4	 16
275	 23	118.8	19.7	 16
276	 23	218.5	37.6	 16
277	 23	84.0	14.8	 16
278	 23	236.3	28.8	 16
279	 23	435.8	54.9	 16
280	 23	119.3	16.7	 16
281	 23	122.8	15.8	 16
282	 23	286.5	299.3	 16
283	 23	425.5	48.6	 16
284	 23	85.0	12.7	 16
285	 23	73.0	11.1	 16
286	 23	118.0	14.9	 16
287	 23	133.5	26.3	 16
288	 23	74.3	13.3	 16
289	 23	489.5	65.3	 16
290	 23	975.8	86.9	 16
291	 23	216.3	25.7	 16
292	 23	183.0	23.7	 16
293	 23	130.3	11.9	 16
294	 23	160.0	26.1	 16
295	 23	110.8	14.8	 16
296	 23	79.5	12.9	 16
297	 23	88.5	18.4	 16
298	 23	231.5	34.8	 16
299	 23	684.0	101.1	 16
300	 23	114.0	19.5	 16
301	 23	99.3	18.6	 16
302	 23	2902.0	290.7	 16
303	 23	97.3	13.3	 16
304	 23	171.8	23.7	 16
305	 23	163.3	18.5	 16
306	 23	273.5	27.3	 16
307	 23	280.0	21.1	 16
308	 23	94.8	13.6	 16
309	 23	107.5	17.8	 16
310	 23	130.3	17.9	 16
311	 23	219.3	28.7	 16
312	 23	386.3	55.5	 16
313	 23	104.5	16.5	 16
314	 23	204.3	39.5	 16
315	 23	82.3	11.6	 16
316	 23	147.3	25.8	 16
317	 23	103.8	16.3	 16
318	 23	91.5	13.1	 16
319	 23	96.5	14.6	 16
320	 23	103.0	18.0	 16
321	 23	104.5	19.9	 16
322	 23	209.3	30.0	 16
323	 23	102.0	15.3	 16
324	 23	445.8	61.1	 16
325	 23	536.5	67.1	 16
326	 23	145.3	19.3	 16
327	 23	86.3	18.4	 16
328	 23	234.5	33.9	 16
329	 23	100.0	13.3	 16
330	 23	275.0	42.5	 16
331	 23	100.3	12.9	 16
332	 23	97.3	14.7	 16
333	 23	78.0	11.7	 16
334	 23	77.8	15.8	 16
335	 23	78.0	8.8	 16
336	 23	98.5	13.2	 16
337	 23	93.0	15.4	 16
338	 23	152.0	20.6	 16
339	 23	78.3	13.7	 16
340	 23	97.0	17.9	 16
341	 23	133.5	18.3	 16
342	 23	129.0	22.1	 16
343	 23	128.3	18.3	 16
344	 23	180.5	26.9	 16
345	 23	371.3	42.1	 16
346	 23	121.3	20.5	 16
347	 23	99.0	16.9	 16
348	 23	159.5	31.4	 16
349	 23	148.0	21.4	 16
350	 23	126.3	17.8	 16
351	 23	68.5	12.9	 20
352	 23	262.8	40.3	 16
353	 23	79.0	14.9	 16
354	 23	411.8	71.0	 16
355	 23	94.8	17.8	 16
356	 23	299.3	43.2	 16
357	 23	115.5	10.8	 16
358	 23	545.8	48.9	 16
359	 23	311.3	40.9	 16
360	 23	210.3	20.6	 16
361	 23	328.0	36.7	 16
362	 23	1021.0	133.2	 16
363	 23	200.8	27.0	 16
364	 23	118.8	19.8	 16
365	 23	249.5	38.2	 16
366	 23	72.8	14.6	 16
367	 23	70.3	13.7	 16
368	 23	83.5	13.1	 16
369	 23	77.5	17.0	 16
370	 23	96.8	15.5	 16
371	 23	74.0	11.2	 16
372	 23	261.3	36.2	 16
373	 23	288.0	36.8	 16
374	 23	90.0	21.4	 16
375	 23	92.8	12.7	 16
376	 23	80.0	15.1	 16
377	 23	213.0	16.5	 16
378	 23	175.0	26.7	 16
379	 23	247.5	36.9	 16
380	 23	160.5	25.9	 16
381	 23	2313.8	172.0	 16
382	 23	175.3	19.9	 16
383	 23	91.3	15.4	 16
384	 23	102.3	14.3	 16
385	 23	109.3	16.4	 16
386	 23	98.3	15.0	 16
387	 23	97.0	16.0	 16
388	 23	72.3	15.7	 16
389	 23	101.0	15.3	 16
390	 23	112.5	23.8	 16
391	 23	545.5	65.1	 16
392	 23	94.0	17.7	 16
393	 23	95.5	18.0	 16
394	 23	295.8	35.8	 16
395	 23	95.8	19.6	 16
396	 23	104.5	25.3	 16
397	 23	296.0	39.4	 16
398	 23	140.5	20.9	 16
399	 23	188.0	19.4	 16
400	 23	587.0	70.1	 16
401	 23	123.0	15.2	 16
402	 23	1206.5	145.3	 16
403	 23	5155.5	509.0	 16
404	 23	120.3	13.5	 16
405	 23	1902.0	245.5	 16
406	 23	88.0	10.3	 16
407	 23	108.3	15.5	 16
408	 23	215.5	33.5	 16
409	 23	157.0	38.1	 16
410	 23	144.3	20.3	 16
411	 23	151.8	17.3	 16
412	 23	252.5	32.5	 16
413	 23	307.3	51.7	 16
414	 23	76.0	12.4	 16
415	 23	144.5	21.7	 16
416	 23	189.8	29.3	 16
417	 23	124.5	19.7	 16
418	 23	253.0	28.6	 16
419	 23	138.8	16.9	 16
420	 23	76.3	14.8	 16
421	 23	81.0	10.3	 16
422	 23	344.8	45.7	 16
423	 23	102.5	12.1	 16
424	 23	97.0	14.7	 16
425	 23	89.3	18.6	 16
426	 23	1223.8	119.5	 16
427	 23	295.0	49.6	 16
428	 23	287.0	42.5	 16
429	 23	2808.5	386.9	 16
430	 23	1905.8	344.0	 16
431	 23	97.5	15.4	 16
432	 23	115.8	16.6	 16
433	 23	98.3	14.9	 16
434	 23	158.5	22.9	 16
435	 23	352.5	42.4	 16
436	 23	226.8	28.0	 16
437	 23	214.3	28.3	 16
438	 23	179.0	23.3	 16
439	 23	333.3	47.2	 16
440	 23	103.3	19.0	 16
441	 23	148.3	17.6	 16
442	 23	133.0	16.4	 16
443	 23	108.3	15.2	 16
444	 23	98.8	15.5	 16
445	 23	213.8	22.8	 16
446	 23	251.5	31.4	 16
447	 23	615.8	64.8	 16
448	 23	239.0	20.7	 16
449	 23	148.3	15.3	 16
450	 23	262.8	29.0	 16
451	 23	180.3	26.5	 16
452	 23	176.3	15.4	 16
453	 23	119.3	13.9	 16
454	 23	107.0	20.6	 16
455	 23	551.8	90.9	 16
456	 23	110.3	17.7	 16
457	 23	150.0	13.3	 16
458	 23	334.3	35.1	 16
459	 23	354.0	29.0	 16
460	 23	164.8	19.1	 16
461	 23	564.8	82.7	 16
462	 23	203.3	19.4	 16
463	 23	153.8	19.8	 16
464	 23	217.3	30.0	 16
465	 23	79.5	10.3	 16
466	 23	67.5	9.8	 16
467	 23	68.3	10.7	 16
468	 23	307.3	44.4	 16
469	 23	151.0	26.3	 16
470	 23	89.5	16.2	 16
471	 23	94.0	18.6	 16
472	 23	511.5	84.8	 16
473	 23	191.0	33.1	 16
474	 23	351.8	38.7	 16
475	 23	650.5	81.6	 16
476	 23	210.0	23.4	 16
477	 23	217.8	25.3	 16
478	 23	129.8	15.1	 16
479	 23	417.3	42.0	 16
480	 23	129.8	23.0	 16
481	 23	79.0	11.1	 16
482	 23	95.5	14.2	 16
483	 23	100.0	14.5	 16
484	 23	513.5	42.3	 16
485	 23	193.8	18.6	 16
486	 23	169.5	24.3	 16
487	 23	119.5	17.7	 16
488	 23	99.5	15.7	 16
489	 23	837.3	139.8	 16
490	 23	110.3	11.3	 16
491	 23	119.3	17.9	 16
492	 23	124.0	13.1	 16
493	 23	610.0	41.6	 16
494	 23	139.8	17.5	 16
495	 23	120.5	24.2	 16
496	 23	85.8	12.1	 16
497	 23	725.3	106.3	 16
498	 23	102.5	20.6	 16
499	 23	211.0	25.9	 16
500	 23	136.8	28.2	 16
501	 23	86.5	26.1	 16
502	 23	149.3	24.3	 16
503	 23	102.3	17.7	 16
504	 23	224.0	26.8	 16
505	 23	384.8	37.8	 16
506	 23	127.3	17.2	 16
507	 23	113.3	15.1	 16
508	 23	83.3	11.2	 16
509	 23	111.0	14.2	 16
510	 23	165.5	36.3	 16
511	 23	406.5	60.4	 16
512	 23	93.0	16.5	 16
513	 23	138.8	26.5	 16
514	 23	67.5	12.4	 16
515	 23	73.0	9.6	 16
516	 23	121.0	14.4	 16
517	 23	90.0	12.8	 16
518	 23	135.3	19.1	 16
519	 23	92.8	16.4	 16
520	 23	141.8	21.3	 16
521	 23	637.5	76.8	 16
522	 23	1188.5	257.9	 16
523	 23	167.0	29.1	 16
524	 23	324.0	36.7	 16
525	 23	83.5	10.0	 16
526	 23	90.3	22.3	 16
527	 23	185.0	20.6	 16
528	 23	219.3	29.1	 16
529	 23	268.3	39.7	 20
530	 23	204.3	30.7	 16
531	 23	137.3	18.8	 16
532	 23	7012.0	639.0	 16
533	 23	158.5	22.0	 16
534	 23	189.3	20.9	 16
535	 23	294.0	42.9	 16
536	 23	109.3	20.4	 16
537	 23	185.3	16.9	 16
538	 23	113.8	22.3	 16
539	 23	107.8	18.1	 16
540	 23	227.3	46.2	 16
541	 23	82.5	17.1	 16
542	 23	81.3	21.1	 16
543	 23	2181.0	286.5	 16
544	 23	144.3	15.4	 16
545	 23	82.5	11.7	 16
546	 23	97.8	13.1	 16
547	 23	130.3	10.9	 16
548	 23	83.8	12.1	 16
549	 23	265.5	26.0	 16
550	 23	124.3	19.5	 16
551	 23	356.8	44.3	 16
552	 23	109.5	22.8	 16
553	 23	164.8	21.7	 16
554	 23	151.5	20.9	 16
555	 23	139.3	26.2	 16
556	 23	226.8	45.3	 16
557	 23	171.8	21.8	 16
558	 23	123.0	19.8	 16
559	 23	74.5	14.7	 16
560	 23	79.8	12.4	 16
561	 23	2596.3	319.3	 16
562	 23	109.0	21.6	 16
563	 23	174.0	25.7	 16
564	 23	164.5	19.9	 16
565	 23	222.8	47.4	 16
566	 23	558.5	105.9	 16
567	 23	806.3	140.8	 16
568	 23	538.5	77.8	 16
569	 23	123.3	19.4	 16
570	 23	123.8	13.9	 16
571	 23	73.3	16.0	 16
572	 23	136.8	19.7	 16
573	 23	821.8	190.2	 16
574	 23	228.8	36.6	 16
575	 23	657.0	86.9	 16
576	 23	96.8	14.1	 16
577	 23	83.8	12.8	 16
578	 23	667.0	108.4	 16
579	 23	92.0	14.4	 16
580	 23	74.5	16.0	 16
581	 23	332.0	77.5	 16
582	 23	334.3	64.2	 16
583	 23	81.5	14.2	 16
584	 23	178.3	33.3	 16
585	 23	73.0	11.8	 16
586	 23	836.3	164.8	 16
587	 23	1220.5	290.4	 16
588	 23	106.0	17.2	 16
589	 23	523.3	86.3	 16
590	 23	314.3	63.9	 16
591	 23	96.8	14.6	 16
592	 23	253.0	31.6	 16
593	 23	293.8	34.0	 16
594	 23	586.3	84.0	 16
595	 23	81.0	15.9	 16
596	 23	170.5	30.2	 16
597	 23	72.3	9.2	 16
598	 23	90.5	11.1	 16
599	 23	266.8	38.8	 16
600	 23	121.8	21.2	 16
601	 23	84.0	13.3	 16
602	 23	92.3	12.5	 16
603	 23	1452.5	212.7	 16
604	 23	88.0	11.3	 16
605	 23	174.3	28.3	 16
606	 23	126.0	15.2	 16
607	 23	157.3	26.2	 16
608	 23	507.0	48.4	 16
609	 23	159.0	20.2	 16
610	 23	128.0	15.9	 16
611	 23	245.3	48.7	 16
612	 23	544.3	53.3	 16
613	 23	157.0	18.2	 16
614	 23	553.0	87.8	 16
615	 23	199.8	39.5	 16
616	 23	223.5	19.6	 16
617	 23	86.0	13.0	 16
618	 23	303.3	36.2	 16
619	 23	190.8	22.6	 16
620	 23	163.3	17.7	 16
621	 23	132.3	15.1	 16
622	 23	140.5	15.4	 16
623	 23	241.5	24.0	 16
624	 23	135.5	22.0	 16
625	 23	151.0	15.1	 16
626	 23	129.8	15.0	 16
627	 23	118.3	20.0	 16
628	 23	153.0	21.0	 16
629	 23	74.8	14.4	 16
630	 23	91.0	13.9	 16
631	 23	195.0	19.0	 16
632	 23	126.3	21.0	 16
633	 23	146.5	17.8	 16
634	 23	692.3	108.4	 16
635	 23	267.0	27.5	 16
636	 23	306.5	52.1	 16
637	 23	372.5	36.1	 16
638	 23	125.8	33.3	 16
639	 23	135.5	24.7	 16
640	 23	469.8	95.4	 16
641	 23	96.3	20.4	 16
642	 23	98.3	16.7	 16
643	 23	101.5	12.6	 16
644	 23	385.3	50.9	 16
645	 23	124.8	21.8	 16
646	 23	216.5	22.1	 16
647	 23	111.8	15.9	 16
648	 23	246.0	52.8	 16
649	 23	154.8	23.2	 16
650	 23	155.8	17.0	 16
651	 23	106.0	16.2	 16
652	 23	91.3	14.5	 16
653	 23	93.5	18.8	 16
654	 23	90.5	11.7	 16
655	 23	79.5	10.2	 16
656	 23	123.0	19.8	 16
657	 23	135.3	21.2	 16
658	 23	146.8	19.1	 16
659	 23	163.0	22.1	 16
660	 23	176.8	28.5	 16
661	 23	81.0	15.1	 16
662	 23	232.3	32.1	 16
663	 23	156.0	18.8	 16
664	 23	165.5	14.3	 16
665	 23	114.5	20.9	 16
666	 23	97.8	19.1	 16
667	 23	101.8	12.5	 16
668	 23	71.8	12.2	 16
669	 23	92.5	13.8	 16
670	 23	72.0	10.0	 16
671	 23	148.0	21.3	 16
672	 23	117.8	21.6	 16
673	 23	86.8	15.2	 16
674	 23	80.5	32.2	 16
675	 23	106.3	14.1	 16
676	 23	162.0	25.8	 16
677	 23	156.3	23.8	 16
678	 23	92.0	10.8	 16
679	 23	70.3	7.9	 16
680	 23	71.3	12.5	 16
681	 23	138.5	25.7	 16
682	 23	290.0	37.5	 16
683	 23	134.3	22.1	 16
684	 23	183.3	36.6	 16
685	 23	94.3	9.5	 16
686	 23	110.0	15.7	 16
687	 23	105.8	15.4	 16
688	 23	341.5	33.0	 16
689	 23	133.3	16.8	 16
690	 23	107.5	17.0	 16
691	 23	115.3	21.3	 16
692	 23	70.3	10.8	 16
693	 23	147.8	28.5	 16
694	 23	237.5	46.6	 16
695	 23	88.8	15.8	 16
696	 23	71.0	10.8	 16
697	 23	82.3	9.6	 16
698	 23	65.5	8.8	 16
699	 23	79.5	15.6	 16
700	 23	230.5	33.4	 16
701	 23	185.0	31.4	 16
702	 23	182.8	19.1	 16
703	 23	201.0	37.6	 16
704	 23	144.8	16.9	 16
705	 23	164.3	25.7	 16
706	 23	157.8	28.7	 16
707	 23	160.5	19.2	 20
708	 23	156.3	24.9	 16
709	 23	138.5	16.7	 16
710	 23	83.8	12.8	 16
711	 23	132.0	13.4	 16
  0	 24	7977.8	1508.0	 16
  1	 24	125.0	40.6	 16
  2	 24	80.3	10.2	 16
  3	 24	79.0	16.4	 16
  4	 24	175.0	38.8	 16
  5	 24	71.3	12.6	 16
  6	 24	160.5	28.0	 16
  7	 24	178.3	24.2	 16
  8	 24	143.0	14.9	 16
  9	 24	79.8	13.9	 16
 10	 24	81.0	14.0	 16
 11	 24	205.3	30.9	 16
 12	 24	90.8	14.2	 16
 13	 24	392.3	43.6	 16
 14	 24	126.0	28.0	 20
 15	 24	184.0	17.9	 16
 16	 24	95.0	19.6	 16
 17	 24	82.5	16.5	 16
 18	 24	116.0	18.9	 16
 19	 24	133.5	18.2	 16
 20	 24	84.5	10.8	 16
 21	 24	84.3	15.3	 16
 22	 24	127.5	24.4	 16
 23	 24	162.8	24.2	 16
 24	 24	472.0	55.8	 16
 25	 24	370.8	51.2	 16
 26	 24	85.5	16.3	 16
 27	 24	92.3	21.5	 16
 28	 24	77.3	13.1	 16
 29	 24	170.3	33.6	 16
 30	 24	163.8	30.0	 16
 31	 24	388.8	67.3	 16
 32	 24	151.5	25.2	 16
 33	 24	143.5	21.4	 16
 34	 24	81.3	15.5	 16
 35	 24	98.5	16.1	 16
 36	 24	195.0	34.7	 16
 37	 24	81.0	12.1	 16
 38	 24	72.0	14.5	 16
 39	 24	97.8	15.2	 16
 40	 24	76.0	12.6	 16
 41	 24	81.5	19.0	 16
 42	 24	83.3	10.5	 16
 43	 24	82.8	14.8	 16
 44	 24	129.3	26.5	 16
 45	 24	313.0	39.3	 16
 46	 24	124.3	21.4	 16
 47	 24	128.5	14.5	 16
 48	 24	114.0	16.7	 16
 49	 24	114.5	18.1	 16
 50	 24	93.0	12.6	 16
 51	 24	117.0	14.9	 16
 52	 24	457.5	66.3	 16
 53	 24	414.0	49.3	 16
 54	 24	287.8	58.3	 16
 55	 24	370.5	42.3	 16
 56	 24	86.3	16.7	 16
 57	 24	101.0	16.3	 16
 58	 24	97.0	17.1	 16
 59	 24	80.8	17.7	 16
 60	 24	66.0	33.7	 16
 61	 24	88.5	16.0	 16
 62	 24	107.8	19.4	 16
 63	 24	93.5	11.4	 16
 64	 24	123.3	22.4	 16
 65	 24	79.8	13.3	 16
 66	 24	89.8	14.9	 16
 67	 24	80.3	11.3	 16
 68	 24	74.5	12.2	 16
 69	 24	120.3	17.0	 16
 70	 24	167.8	25.4	 16
 71	 24	95.5	14.0	 16
 72	 24	86.0	20.0	 16
 73	 24	172.8	20.1	 16
 74	 24	91.3	17.2	 16
 75	 24	97.0	17.2	 16
 76	 24	164.5	28.7	 16
 77	 24	81.8	17.3	 16
 78	 24	77.5	12.2	 16
 79	 24	85.3	9.6	 16
 80	 24	97.0	19.2	 16
 81	 24	88.0	14.7	 16
 82	 24	120.3	13.7	 16
 83	 24	80.8	12.5	 16
 84	 24	85.3	16.2	 16
 85	 24	92.3	11.1	 16
 86	 24	67.3	14.3	 16
 87	 24	116.3	16.9	 16
 88	 24	135.5	21.0	 16
 89	 24	93.0	20.3	 16
 90	 24	72.5	11.7	 16
 91	 24	114.0	12.2	 16
 92	 24	118.3	20.8	 16
 93	 24	113.8	12.4	 16
 94	 24	185.8	24.6	 16
 95	 24	96.0	11.6	 16
 96	 24	114.3	16.9	 16
 97	 24	86.8	19.9	 16
 98	 24	99.8	16.0	 16
 99	 24	90.8	14.4	 16
100	 24	96.0	17.3	 16
101	 24	125.3	21.9	 16
102	 24	173.3	21.5	 16
103	 24	88.8	14.8	 16
104	 24	147.3	16.9	 16
105	 24	167.5	24.6	 16
106	 24	109.3	18.9	 16
107	 24	93.5	12.2	 16
108	 24	94.8	18.7	 16
109	 24	71.0	12.6	 16
110	 24	88.5	14.0	 16
111	 24	116.3	11.6	 16
112	 24	181.0	16.8	 16
113	 24	75.3	9.9	 16
114	 24	73.0	9.1	 16
115	 24	79.3	10.5	 16
116	 24	76.0	13.2	 16
117	 24	85.3	8.5	 16
118	 24	95.0	15.1	 16
119	 24	71.0	16.9	 16
120	 24	79.0	10.6	 16
121	 24	116.8	21.1	 16
122	 24	74.0	17.3	 16
123	 24	87.3	8.2	 16
124	 24	100.5	36.1	 16
125	 24	72.3	16.9	 16
126	 24	96.5	18.6	 16
127	 24	113.0	17.9	 16
128	 24	117.3	15.5	 16
129	 24	118.3	19.2	 16
130	 24	127.5	17.7	 16
131	 24	117.5	60.6	 16
132	 24	135.0	19.4	 16
133	 24	462.3	55.2	 16
134	 24	407.5	40.8	 16
135	 24	140.8	25.9	 16
136	 24	358.5	44.7	 16
137	 24	127.3	16.3	 16
138	 24	128.8	15.5	 12
139	 24	106.5	14.8	 16
140	 24	78.8	12.4	 16
141	 24	84.5	14.2	 16
142	 24	87.0	20.8	 16
143	 24	69.0	12.5	 16
144	 24	125.0	28.1	 16
145	 24	124.3	13.1	 16
146	 24	197.3	17.8	 16
147	 24	84.0	12.7	 16
148	 24	87.0	15.1	 16
149	 24	77.0	13.6	 16
150	 24	74.5	18.2	 16
151	 24	87.8	14.9	 16
152	 24	69.3	14.6	 16
153	 24	91.8	16.9	 16
154	 24	74.0	8.4	 16
155	 24	104.0	20.2	 16
156	 24	119.5	20.6	 16
157	 24	138.8	20.7	 16
158	 24	124.5	23.7	 16
159	 24	96.3	9.7	 16
160	 24	364.5	33.1	 16
161	 24	317.5	29.6	 16
162	 24	73.0	15.6	 16
163	 24	64.5	7.5	 16
164	 24	125.0	24.8	 16
165	 24	95.8	13.3	 16
166	 24	85.8	12.9	 16
167	 24	108.5	18.1	 16
168	 24	100.5	13.5	 16
169	 24	82.8	10.2	 16
170	 24	118.8	23.2	 16
171	 24	71.0	14.4	 16
172	 24	103.3	21.8	 16
173	 24	716.5	90.7	 16
174	 24	114.8	21.9	 16
175	 24	82.8	12.7	 16
176	 24	69.5	11.7	 16
177	 24	107.5	17.3	 16
178	 24	81.3	8.1	 16
179	 24	85.5	12.4	 16
180	 24	377.8	66.6	 16
181	 24	185.3	21.3	 16
182	 24	128.0	12.7	 16
183	 24	98.5	14.0	 16
184	 24	159.0	23.1	 16
185	 24	67.3	10.5	 16
186	 24	81.3	16.0	 16
187	 24	94.0	13.5	 16
188	 24	304.5	23.5	 16
189	 24	339.0	42.3	 16
190	 24	209.3	28.8	 16
191	 24	202.0	29.4	 16
192	 24	135.3	20.4	 20
193	 24	128.5	21.9	 16
194	 24	124.5	13.7	 16
195	 24	79.0	14.5	 16
196	 24	160.0	18.9	 16
197	 24	120.8	19.0	 16
198	 24	115.8	21.2	 16
199	 24	93.8	18.3	 16
200	 24	158.0	22.3	 16
201	 24	72.3	12.1	 16
202	 24	79.3	12.9	 16
203	 24	127.0	16.8	 16
204	 24	75.8	15.3	 16
205	 24	90.5	11.3	 16
206	 24	107.5	16.9	 16
207	 24	71.8	12.0	 16
208	 24	69.5	12.3	 16
209	 24	129.8	17.5	 16
210	 24	105.3	16.1	 16
211	 24	113.5	22.2	 16
212	 24	114.3	17.7	 16
213	 24	214.0	22.9	 16
214	 24	109.3	11.6	 16
215	 24	222.3	25.1	 16
216	 24	87.3	15.7	 16
217	 24	78.3	13.9	 16
218	 24	72.5	11.3	 16
219	 24	243.0	27.1	 16
220	 24	99.0	16.7	 16
221	 24	157.8	25.9	 16
222	 24	76.5	9.7	 16
223	 24	72.5	12.1	 16
224	 24	80.3	9.1	 16
225	 24	118.5	24.8	 16
226	 24	83.5	12.3	 16
227	 24	94.0	13.1	 16
228	 24	86.5	14.4	 16
229	 24	90.3	14.8	 16
230	 24	139.5	25.7	 16
231	 24	208.5	22.8	 16
232	 24	606.0	61.0	 16
233	 24	252.5	31.6	 16
234	 24	74.5	9.9	 16
235	 24	149.3	20.4	 16
236	 24	89.3	11.9	 16
237	 24	69.5	14.7	 16
238	 24	79.3	11.7	 16
239	 24	699.5	71.0	 16
240	 24	122.3	17.7	 16
241	 24	150.8	20.9	 16
242	 24	75.5	10.7	 16
243	 24	83.5	9.5	 16
244	 24	83.0	14.4	 16
245	 24	109.3	21.2	 16
246	 24	90.5	14.3	 16
247	 24	69.5	12.0	 16
248	 24	97.8	22.3	 16
249	 24	117.5	15.5	 16
250	 24	80.0	13.4	 16
251	 24	71.8	11.6	 16
252	 24	158.0	23.0	 16
253	 24	67.5	11.9	 16
254	 24	79.3	13.0	 16
255	 24	77.3	14.1	 16
256	 24	231.5	21.1	 16
257	 24	141.8	15.0	 16
258	 24	194.8	23.0	 16
259	 24	136.8	14.5	 16
260	 24	431.3	51.0	 16
261	 24	501.3	59.2	 16
262	 24	513.5	66.8	 16
263	 24	68.5	12.5	 16
264	 24	71.3	12.0	 16
265	 24	75.5	16.7	 16
266	 24	83.0	18.1	 16
267	 24	116.8	16.6	 16
268	 24	156.8	20.1	 16
269	 24	138.0	20.9	 16
270	 24	95.8	12.0	 16
271	 24	94.0	15.0	 16
272	 24	135.5	21.9	 16
273	 24	995.5	203.6	 16
274	 24	71.5	10.3	 16
275	 24	88.8	20.5	 16
276	 24	173.5	30.7	 16
277	 24	77.5	11.5	 16
278	 24	134.3	14.4	 16
279	 24	161.0	28.3	 16
280	 24	96.0	17.2	 16
281	 24	109.0	13.5	 16
282	 24	211.5	24.4	 16
283	 24	322.0	33.5	 16
284	 24	79.0	14.3	 16
285	 24	77.0	12.8	 16
286	 24	76.3	9.3	 16
287	 24	73.0	12.6	 16
288	 24	78.8	11.9	 16
289	 24	525.5	56.1	 16
290	 24	176.3	24.1	 16
291	 24	260.0	32.9	 16
292	 24	278.8	28.4	 16
293	 24	127.0	26.0	 16
294	 24	139.0	17.8	 16
295	 24	104.8	19.8	 16
296	 24	73.3	10.9	 16
297	 24	79.3	14.4	 16
298	 24	111.5	13.8	 16
299	 24	151.3	27.2	 16
300	 24	98.3	17.0	 16
301	 24	70.5	10.7	 16
302	 24	200.3	32.5	 16
303	 24	115.0	19.9	 16
304	 24	145.3	18.8	 16
305	 24	168.8	20.9	 16
306	 24	122.5	21.2	 16
307	 24	127.5	18.0	 16
308	 24	71.3	14.3	 16
309	 24	85.3	11.4	 16
310	 24	151.5	25.5	 16
311	 24	147.0	21.4	 16
312	 24	111.8	15.2	 16
313	 24	102.5	13.9	 16
314	 24	154.8	24.5	 16
315	 24	83.0	15.6	 16
316	 24	111.0	18.5	 16
317	 24	95.8	19.9	 16
318	 24	87.3	16.2	 16
319	 24	95.5	20.2	 16
320	 24	197.8	24.4	 16
321	 24	101.8	24.9	 16
322	 24	112.8	18.5	 16
323	 24	96.3	12.9	 16
324	 24	128.0	20.9	 16
325	 24	186.3	23.2	 16
326	 24	256.0	30.9	 16
327	 24	95.0	15.9	 16
328	 24	307.0	38.9	 16
329	 24	100.0	17.1	 16
330	 24	120.3	18.7	 16
331	 24	91.3	11.6	 16
332	 24	96.0	13.3	 16
333	 24	65.3	10.7	 16
334	 24	65.5	10.3	 16
335	 24	90.3	15.2	 16
336	 24	79.5	11.3	 16
337	 24	78.0	16.6	 16
338	 24	106.5	17.7	 16
339	 24	69.8	15.6	 16
340	 24	96.8	13.5	 16
341	 24	135.3	21.5	 16
342	 24	118.0	12.1	 16
343	 24	211.3	32.8	 16
344	 24	124.3	16.3	 16
345	 24	460.5	34.6	 16
346	 24	200.8	31.6	 16
347	 24	102.3	15.9	 16
348	 24	127.8	16.0	 16
349	 24	141.3	19.1	 16
350	 24	108.0	27.8	 16
351	 24	73.3	12.2	 16
352	 24	91.0	14.5	 16
353	 24	81.0	14.0	 16
354	 24	107.3	14.5	 16
355	 24	79.8	8.1	 16
356	 24	402.5	63.9	 16
357	 24	104.3	15.6	 16
358	 24	156.0	27.5	 16
359	 24	211.3	23.8	 16
360	 24	125.0	17.6	 16
361	 24	342.3	36.2	 16
362	 24	318.5	32.9	 16
363	 24	91.0	14.8	 16
364	 24	139.3	23.1	 16
365	 24	152.5	22.5	 16
366	 24	64.0	8.1	 16
367	 24	93.3	19.9	 16
368	 24	66.3	10.5	 16
369	 24	62.3	8.6	 16
370	 24	114.3	18.1	 20
371	 24	96.5	50.6	 16
372	 24	146.3	20.7	 16
373	 24	113.8	17.6	 16
374	 24	64.8	12.8	 16
375	 24	81.8	15.6	 16
376	 24	84.8	15.6	 16
377	 24	150.0	18.6	 16
378	 24	257.5	32.6	 16
379	 24	361.0	39.4	 16
380	 24	117.3	12.8	 16
381	 24	459.0	76.3	 16
382	 24	148.8	17.9	 16
383	 24	77.8	9.2	 16
384	 24	90.5	14.7	 16
385	 24	89.3	15.1	 16
386	 24	76.3	8.4	 16
387	 24	156.8	20.6	 16
388	 24	81.3	9.8	 16
389	 24	89.8	15.6	 16
390	 24	120.0	18.7	 16
391	 24	101.3	16.7	 16
392	 24	65.0	12.3	 16
393	 24	86.3	16.8	 16
394	 24	84.8	15.9	 16
395	 24	77.5	12.0	 16
396	 24	98.3	15.3	 16
397	 24	131.8	17.3	 16
398	 24	100.3	18.3	 16
399	 24	96.3	9.3	 16
400	 24	164.5	26.3	 16
401	 24	76.0	11.8	 16
402	 24	172.0	25.9	 16
403	 24	2047.5	196.4	 16
404	 24	127.3	15.8	 16
405	 24	475.3	75.6	 16
406	 24	69.3	13.6	 16
407	 24	70.8	12.8	 16
408	 24	444.8	37.8	 16
409	 24	244.0	24.5	 16
410	 24	212.8	28.4	 16
411	 24	104.3	16.0	 16
412	 24	117.3	19.8	 16
413	 24	104.0	16.1	 16
414	 24	74.3	10.1	 16
415	 24	83.0	15.6	 16
416	 24	103.3	16.7	 16
417	 24	128.3	22.1	 16
418	 24	110.3	21.0	 16
419	 24	238.8	32.9	 16
420	 24	83.5	16.7	 16
421	 24	75.3	12.2	 16
422	 24	255.3	29.2	 16
423	 24	127.5	24.6	 16
424	 24	103.0	14.7	 16
425	 24	91.8	13.2	 16
426	 24	390.5	46.1	 16
427	 24	104.8	13.0	 16
428	 24	206.8	21.2	 16
429	 24	511.0	46.7	 16
430	 24	304.3	52.5	 16
431	 24	92.8	11.0	 16
432	 24	93.5	12.4	 16
433	 24	93.0	16.2	 16
434	 24	128.8	15.3	 16
435	 24	328.8	31.6	 16
436	 24	140.3	19.6	 16
437	 24	87.3	19.1	 16
438	 24	114.0	20.2	 16
439	 24	294.3	27.3	 16
440	 24	98.3	16.0	 16
441	 24	128.5	16.4	 16
442	 24	113.3	16.3	 16
443	 24	94.3	17.0	 16
444	 24	100.0	12.8	 16
445	 24	162.8	26.8	 16
446	 24	187.5	25.2	 16
447	 24	454.3	40.6	 16
448	 24	172.5	24.7	 16
449	 24	151.0	13.6	 16
450	 24	191.8	31.3	 16
451	 24	155.0	18.0	 16
452	 24	98.8	13.4	 16
453	 24	100.0	13.9	 16
454	 24	89.3	19.9	 16
455	 24	147.3	14.3	 16
456	 24	79.8	12.2	 16
457	 24	74.5	9.5	 16
458	 24	111.3	13.0	 16
459	 24	104.3	16.5	 16
460	 24	69.5	9.0	 16
461	 24	212.3	33.2	 16
462	 24	382.0	14.5	 16
463	 24	124.3	41.6	 16
464	 24	173.0	25.1	 16
465	 24	78.3	24.6	 16
466	 24	67.5	10.1	 16
467	 24	68.8	11.4	 16
468	 24	124.0	19.0	 16
469	 24	120.0	16.9	 16
470	 24	112.3	17.2	 16
471	 24	77.0	12.6	 16
472	 24	176.8	29.0	 16
473	 24	172.5	32.3	 16
474	 24	330.3	42.1	 16
475	 24	204.8	28.8	 16
476	 24	132.5	12.3	 16
477	 24	79.3	13.7	 16
478	 24	84.0	11.0	 16
479	 24	398.8	31.6	 16
480	 24	157.8	23.6	 16
481	 24	119.0	15.0	 16
482	 24	109.8	23.3	 16
483	 24	67.8	11.7	 16
484	 24	196.0	33.8	 16
485	 24	146.3	21.7	 16
486	 24	110.3	16.5	 16
487	 24	81.3	13.3	 16
488	 24	83.3	14.9	 16
489	 24	133.5	18.3	 16
490	 24	92.0	15.6	 16
491	 24	74.3	12.2	 16
492	 24	86.0	12.2	 16
493	 24	466.0	51.9	 16
494	 24	163.8	17.9	 16
495	 24	111.0	20.5	 16
496	 24	91.3	14.4	 16
497	 24	166.0	36.8	 16
498	 24	86.8	12.7	 16
499	 24	99.3	12.7	 16
500	 24	72.0	10.2	 16
501	 24	84.0	14.1	 16
502	 24	76.3	10.2	 16
503	 24	72.5	10.8	 16
504	 24	141.0	19.1	 16
505	 24	238.5	32.1	 16
506	 24	127.0	19.0	 16
507	 24	83.0	13.4	 16
508	 24	78.8	14.2	 16
509	 24	130.0	15.7	 16
510	 24	141.5	17.0	 16
511	 24	133.3	19.4	 16
512	 24	87.8	15.3	 16
513	 24	68.5	11.4	 16
514	 24	75.3	12.1	 16
515	 24	73.5	14.6	 16
516	 24	97.0	15.7	 16
517	 24	84.3	27.1	 16
518	 24	169.0	23.8	 16
519	 24	117.8	15.0	 16
520	 24	208.3	16.6	 16
521	 24	969.8	69.1	 16
522	 24	184.8	28.5	 16
523	 24	154.0	16.6	 16
524	 24	143.0	18.3	 16
525	 24	82.5	12.4	 16
526	 24	108.0	17.7	 16
527	 24	156.3	14.2	 16
528	 24	176.8	22.2	 16
529	 24	191.0	21.9	 16
530	 24	158.0	27.5	 16
531	 24	112.5	19.5	 16
[truncated: 11,120,507 more chars]
