# Supplementary material for: Identify potential drugs for cardiovascular diseases caused by stress-induced genes in vascular smooth muscle cells
Source: PeerJ. 2016 Sep 28;4:e2478. doi: 10.7717/peerj.2478 (PMC5045879; doi:10.7717/peerj.2478)
Supplement: Supplemental Information 9 [file peerj-04-2478-s009.cel]

[CEL]
Version=3

[HEADER]
Cols=712
Rows=712
TotalX=712
TotalY=712
OffsetX=0
OffsetY=0
GridCornerUL=229 233
GridCornerUR=4506 260
GridCornerLR=4489 4531
GridCornerLL=212 4504
Axis-invertX=0
AxisInvertY=0
swapXY=0
DatHeader=[0..33902]  T 24:CLS=4733 RWS=4733 XIN=3  YIN=3  VE=17        2.0 02/04/03 17:01:53       HG-U133A.1sq                  6
Algorithm=Percentile
AlgorithmParameters=Percentile:75;CellMargin:2;OutlierHigh:1.500;OutlierLow:1.004

[INTENSITY]
NumberCells=506944
CellHeader=X	Y	MEAN	STDV	NPIXELS
  0	  0	92.5	14.5	 16
  1	  0	8333.3	818.5	 16
  2	  0	114.0	17.0	 16
  3	  0	8571.5	951.6	 16
  4	  0	65.3	18.2	 16
  5	  0	87.3	14.4	 16
  6	  0	7831.5	913.7	 16
  7	  0	164.0	25.8	 16
  8	  0	8268.8	1027.0	 16
  9	  0	479.3	120.5	 16
 10	  0	8805.0	1374.2	 16
 11	  0	503.8	162.7	 16
 12	  0	8548.0	1340.2	 16
 13	  0	202.5	24.9	 16
 14	  0	7789.0	1412.3	 16
 15	  0	120.8	30.2	 16
 16	  0	7565.0	1187.6	 16
 17	  0	109.0	21.0	 16
 18	  0	7440.8	947.6	 16
 19	  0	105.8	16.0	 16
 20	  0	7468.5	859.2	 16
 21	  0	98.8	17.5	 16
 22	  0	7438.5	662.9	 16
 23	  0	112.0	14.8	 16
 24	  0	7470.3	539.4	 16
 25	  0	95.5	12.3	 16
 26	  0	7379.8	503.6	 16
 27	  0	103.0	13.8	 16
 28	  0	7451.8	403.5	 16
 29	  0	96.8	16.5	 16
 30	  0	7480.0	410.5	 16
 31	  0	101.5	16.5	 16
 32	  0	7383.5	547.8	 16
 33	  0	93.8	8.0	 16
 34	  0	7155.3	588.8	 16
 35	  0	100.3	12.1	 16
 36	  0	7236.8	703.1	 16
 37	  0	108.3	17.5	 16
 38	  0	7787.5	940.7	 16
 39	  0	99.3	20.0	 16
 40	  0	7776.0	1018.0	 16
 41	  0	97.3	17.9	 16
 42	  0	7684.8	943.9	 16
 43	  0	97.0	20.7	 16
 44	  0	7363.3	747.0	 16
 45	  0	122.3	13.8	 16
 46	  0	7420.3	677.0	 16
 47	  0	107.3	16.3	 16
 48	  0	7567.3	610.0	 16
 49	  0	89.8	16.7	 16
 50	  0	7326.5	480.3	 16
 51	  0	99.3	15.6	 16
 52	  0	7179.0	469.7	 16
 53	  0	110.8	18.7	 16
 54	  0	6949.3	544.3	 16
 55	  0	102.5	13.6	 16
 56	  0	7029.0	497.8	 16
 57	  0	113.0	16.0	 16
 58	  0	7313.3	710.9	 16
 59	  0	96.3	16.5	 16
 60	  0	7329.0	1757.8	 20
 61	  0	121.8	29.2	 16
 62	  0	7052.3	1847.7	 16
 63	  0	97.0	23.9	 16
 64	  0	7203.3	1929.4	 16
 65	  0	101.5	19.2	 16
 66	  0	6967.5	1766.4	 16
 67	  0	96.0	21.8	 16
 68	  0	6878.5	1682.9	 16
 69	  0	92.0	16.0	 16
 70	  0	6915.8	1604.4	 16
 71	  0	109.5	20.6	 16
 72	  0	6825.5	1619.4	 16
 73	  0	100.5	13.4	 16
 74	  0	6715.0	1425.9	 16
 75	  0	113.8	19.6	 16
 76	  0	6718.0	1377.2	 16
 77	  0	95.3	14.0	 16
 78	  0	6675.3	1315.6	 16
 79	  0	92.0	15.1	 16
 80	  0	6466.3	1153.6	 16
 81	  0	88.8	16.2	 16
 82	  0	6747.5	1209.9	 16
 83	  0	102.5	11.9	 16
 84	  0	6844.8	1099.5	 16
 85	  0	99.3	15.5	 16
 86	  0	6610.8	1009.2	 16
 87	  0	110.5	45.1	 16
 88	  0	6869.3	1029.2	 16
 89	  0	99.5	12.3	 16
 90	  0	6914.5	1058.1	 16
 91	  0	91.8	13.8	 16
 92	  0	6772.8	891.0	 16
 93	  0	88.8	17.7	 16
 94	  0	6761.0	756.2	 16
 95	  0	103.0	16.3	 16
 96	  0	6827.0	805.1	 16
 97	  0	107.0	22.3	 16
 98	  0	6463.5	557.4	 16
 99	  0	93.0	15.6	 16
100	  0	6570.8	534.8	 16
101	  0	102.0	15.2	 16
102	  0	6470.0	407.5	 16
103	  0	107.0	15.6	 16
104	  0	6289.0	432.0	 16
105	  0	81.3	14.1	 16
106	  0	6285.8	444.0	 16
107	  0	89.5	15.4	 16
108	  0	6225.0	436.1	 16
109	  0	94.8	14.3	 16
110	  0	6180.8	510.0	 16
111	  0	97.8	14.9	 16
112	  0	6152.8	525.8	 16
113	  0	91.0	11.9	 16
114	  0	6104.5	614.9	 16
115	  0	86.0	13.7	 16
116	  0	6380.5	761.9	 16
117	  0	83.3	15.8	 16
118	  0	6027.8	829.2	 16
119	  0	93.8	15.4	 16
120	  0	6141.5	767.2	 16
121	  0	101.0	18.0	 16
122	  0	6275.5	631.9	 16
123	  0	96.5	16.4	 16
124	  0	6063.5	481.6	 16
125	  0	91.0	19.6	 16
126	  0	6060.5	474.9	 16
127	  0	93.5	16.6	 16
128	  0	5944.0	424.9	 16
129	  0	92.5	14.8	 16
130	  0	5904.5	360.0	 16
131	  0	97.0	16.9	 16
132	  0	6000.3	397.2	 16
133	  0	94.0	19.3	 16
134	  0	6044.8	727.3	 16
135	  0	86.5	13.9	 16
136	  0	5797.0	574.6	 16
137	  0	96.5	26.8	 16
138	  0	5917.0	649.5	 16
139	  0	120.5	30.5	 16
140	  0	6058.0	846.1	 16
141	  0	100.3	16.5	 16
142	  0	6185.8	987.9	 16
143	  0	186.5	34.3	 16
144	  0	6436.0	1229.5	 16
145	  0	163.0	43.0	 16
146	  0	5946.8	707.7	 16
147	  0	93.5	14.0	 16
148	  0	5713.5	557.0	 16
149	  0	94.3	19.1	 16
150	  0	5936.8	535.4	 16
151	  0	103.0	11.5	 16
152	  0	5845.8	486.0	 16
153	  0	92.8	11.6	 16
154	  0	5959.8	427.9	 16
155	  0	111.3	37.9	 16
156	  0	5856.0	523.6	 16
157	  0	88.0	11.3	 16
158	  0	5760.0	440.9	 16
159	  0	79.3	11.3	 16
160	  0	5623.8	537.9	 16
161	  0	92.0	15.9	 16
162	  0	5586.0	592.9	 16
163	  0	89.8	17.6	 16
164	  0	5481.8	660.5	 16
165	  0	100.3	16.2	 16
166	  0	5436.5	754.1	 16
167	  0	90.8	17.9	 16
168	  0	5507.8	896.4	 16
169	  0	86.5	13.0	 16
170	  0	5503.5	1024.5	 16
171	  0	89.0	12.1	 16
172	  0	5446.5	744.8	 16
173	  0	84.0	15.2	 16
174	  0	5426.8	781.5	 16
175	  0	97.5	17.9	 16
176	  0	5525.3	736.9	 16
177	  0	86.8	17.2	 16
178	  0	5473.5	732.3	 16
179	  0	89.3	12.5	 20
180	  0	5328.3	1017.0	 16
181	  0	94.0	14.2	 16
182	  0	5254.0	1038.8	 16
183	  0	86.8	18.3	 16
184	  0	4936.8	1042.9	 16
185	  0	78.3	14.6	 16
186	  0	5114.3	1031.1	 16
187	  0	81.0	14.4	 16
188	  0	5019.0	1062.5	 16
189	  0	75.3	10.9	 16
190	  0	5281.5	1016.0	 16
191	  0	93.3	18.7	 16
192	  0	5289.8	1013.3	 16
193	  0	83.3	16.9	 16
194	  0	5211.0	961.8	 16
195	  0	82.5	13.6	 16
196	  0	5171.8	992.2	 16
197	  0	71.5	9.3	 16
198	  0	5211.3	773.2	 16
199	  0	82.3	13.3	 16
200	  0	4975.5	629.2	 16
201	  0	101.0	21.1	 16
202	  0	5296.8	639.9	 16
203	  0	176.3	40.4	 16
204	  0	6021.8	580.1	 16
205	  0	367.5	117.5	 16
206	  0	6190.5	662.7	 16
207	  0	322.3	45.9	 16
208	  0	6008.8	605.8	 16
209	  0	121.3	25.4	 16
210	  0	5184.8	422.3	 16
211	  0	89.5	13.7	 16
212	  0	4820.3	371.7	 16
213	  0	77.5	8.4	 16
214	  0	4911.0	423.3	 16
215	  0	83.5	17.4	 16
216	  0	5002.8	550.5	 16
217	  0	86.5	17.3	 16
218	  0	4847.3	502.6	 16
219	  0	80.3	14.5	 16
220	  0	5114.8	751.7	 16
221	  0	77.5	11.5	 16
222	  0	4970.5	718.0	 16
223	  0	76.0	11.7	 16
224	  0	4945.3	622.3	 16
225	  0	63.0	8.9	 16
226	  0	4835.0	570.3	 16
227	  0	67.5	10.5	 16
228	  0	4826.8	445.9	 16
229	  0	76.5	25.2	 16
230	  0	4970.8	393.5	 16
231	  0	78.5	10.3	 16
232	  0	4791.3	350.3	 16
233	  0	70.3	12.6	 16
234	  0	5025.3	443.3	 16
235	  0	53.3	9.1	 16
236	  0	1830.5	169.0	 16
237	  0	49.0	8.3	 16
238	  0	71.8	12.0	 16
239	  0	56.0	9.9	 16
240	  0	5145.0	570.2	 16
241	  0	78.5	10.6	 16
242	  0	5049.3	657.2	 16
243	  0	87.3	10.4	 16
244	  0	4888.3	631.1	 16
245	  0	90.3	14.1	 16
246	  0	4799.5	734.4	 16
247	  0	74.0	11.3	 16
248	  0	4800.0	820.3	 16
249	  0	82.5	11.9	 16
250	  0	4997.0	992.2	 16
251	  0	77.0	11.8	 16
252	  0	4884.5	385.8	 16
253	  0	76.3	11.2	 16
254	  0	4839.5	365.4	 16
255	  0	77.0	14.9	 16
256	  0	4766.5	316.7	 16
257	  0	89.0	22.8	 16
258	  0	4691.8	298.8	 16
259	  0	91.3	16.1	 16
260	  0	4818.5	323.6	 16
261	  0	78.0	15.0	 16
262	  0	4660.8	323.9	 16
263	  0	80.5	16.1	 16
264	  0	4857.3	340.6	 16
265	  0	79.8	13.4	 16
266	  0	4829.8	408.0	 16
267	  0	93.5	15.3	 16
268	  0	4993.0	460.0	 16
269	  0	82.5	14.0	 16
270	  0	4756.0	490.4	 16
271	  0	75.3	12.7	 16
272	  0	4912.5	684.6	 16
273	  0	74.8	12.1	 16
274	  0	4933.3	783.3	 16
275	  0	92.0	22.2	 16
276	  0	4797.8	776.9	 16
277	  0	79.5	15.6	 16
278	  0	4839.5	490.0	 16
279	  0	83.5	19.4	 16
280	  0	4923.8	423.1	 16
281	  0	82.0	14.2	 16
282	  0	5192.8	414.4	 16
283	  0	75.3	11.0	 16
284	  0	5285.5	420.4	 16
285	  0	81.0	14.1	 16
286	  0	5042.0	357.2	 16
287	  0	72.3	15.4	 16
288	  0	4899.3	513.7	 16
289	  0	83.5	12.7	 16
290	  0	5033.8	447.3	 16
291	  0	94.0	20.2	 16
292	  0	5057.8	590.5	 16
293	  0	84.5	15.5	 16
294	  0	4940.0	602.6	 16
295	  0	77.0	11.3	 16
296	  0	4614.5	656.4	 16
297	  0	86.0	16.0	 16
298	  0	5090.3	983.8	 20
299	  0	85.5	16.8	 16
300	  0	5265.3	1144.2	 16
301	  0	73.8	11.2	 16
302	  0	5061.0	1123.0	 16
303	  0	80.0	13.1	 16
304	  0	5282.0	975.3	 16
305	  0	76.5	10.5	 16
306	  0	5272.0	926.1	 16
307	  0	81.5	10.9	 16
308	  0	5447.8	936.4	 16
309	  0	82.5	16.0	 16
310	  0	5268.0	924.1	 16
311	  0	88.3	12.9	 16
312	  0	5269.8	883.9	 16
313	  0	83.3	9.6	 16
314	  0	5376.0	833.7	 16
315	  0	89.5	19.5	 16
316	  0	5439.3	915.2	 16
317	  0	91.0	20.7	 16
318	  0	5516.8	956.0	 16
319	  0	87.3	13.8	 16
320	  0	5318.5	977.5	 16
321	  0	84.5	15.2	 16
322	  0	5485.0	1007.0	 16
323	  0	79.0	11.4	 16
324	  0	5171.0	961.5	 16
325	  0	75.0	10.7	 16
326	  0	5244.3	1088.4	 16
327	  0	82.0	15.6	 16
328	  0	5589.5	1192.7	 16
329	  0	80.3	12.6	 16
330	  0	5429.5	739.4	 16
331	  0	84.5	14.6	 16
332	  0	5477.8	686.5	 16
333	  0	80.0	11.9	 16
334	  0	5318.0	599.4	 16
335	  0	102.3	16.4	 16
336	  0	5462.8	550.2	 16
337	  0	88.5	15.8	 16
338	  0	5396.3	474.8	 16
339	  0	82.3	14.2	 16
340	  0	5341.8	466.9	 16
341	  0	92.0	11.7	 16
342	  0	5460.0	520.8	 16
343	  0	93.8	13.3	 16
344	  0	5537.0	588.3	 16
345	  0	88.5	13.4	 16
346	  0	5599.5	675.6	 16
347	  0	93.5	19.7	 16
348	  0	5687.3	773.4	 16
349	  0	98.5	14.8	 16
350	  0	5574.0	954.6	 16
351	  0	89.3	10.5	 16
352	  0	5706.8	1118.7	 16
353	  0	101.0	16.0	 16
354	  0	5842.5	1197.8	 16
355	  0	91.3	22.0	 16
356	  0	5729.8	734.7	 16
357	  0	82.0	9.6	 16
358	  0	5768.8	523.3	 16
359	  0	73.0	14.2	 16
360	  0	5765.0	550.2	 16
361	  0	86.3	8.7	 16
362	  0	5600.3	539.8	 16
363	  0	74.5	13.2	 16
364	  0	5522.3	403.9	 16
365	  0	87.3	14.3	 16
366	  0	5571.8	429.0	 16
367	  0	75.5	7.4	 16
368	  0	5409.5	399.2	 16
369	  0	88.0	13.2	 16
370	  0	5473.8	454.0	 16
371	  0	85.3	17.0	 16
372	  0	5612.0	550.9	 16
373	  0	99.0	20.1	 16
374	  0	5703.3	639.5	 16
375	  0	88.8	18.2	 16
376	  0	5467.3	783.0	 16
377	  0	79.5	15.5	 16
378	  0	5628.0	818.7	 16
379	  0	72.3	8.8	 16
380	  0	5489.5	998.3	 16
381	  0	79.8	12.7	 16
382	  0	5353.5	735.1	 16
383	  0	87.3	12.5	 16
384	  0	5232.8	567.0	 16
385	  0	82.8	19.6	 16
386	  0	5331.5	578.9	 16
387	  0	72.0	10.4	 16
388	  0	5420.5	491.8	 16
389	  0	72.3	7.7	 16
390	  0	5249.8	435.1	 16
391	  0	76.3	11.4	 16
392	  0	5538.0	424.5	 16
393	  0	82.3	11.3	 16
394	  0	5382.5	389.9	 16
395	  0	78.0	11.9	 16
396	  0	5504.0	500.9	 16
397	  0	92.0	13.4	 16
398	  0	5333.0	532.4	 16
399	  0	84.0	14.4	 16
400	  0	5511.5	630.7	 16
401	  0	85.0	12.4	 16
402	  0	5536.5	790.1	 16
403	  0	92.3	16.2	 16
404	  0	5564.8	913.4	 16
405	  0	87.5	11.8	 16
406	  0	5596.8	943.6	 16
407	  0	91.5	14.5	 16
408	  0	5446.8	1062.5	 16
409	  0	75.3	14.6	 16
410	  0	5379.5	738.3	 16
411	  0	87.0	16.8	 16
412	  0	5369.8	690.6	 16
413	  0	87.0	18.5	 16
414	  0	5198.8	577.9	 16
415	  0	80.3	12.4	 16
416	  0	5310.3	909.6	 20
417	  0	79.0	12.7	 16
418	  0	5558.5	939.2	 16
419	  0	90.3	13.4	 16
420	  0	5618.3	901.9	 16
421	  0	81.8	13.0	 16
422	  0	5574.5	825.0	 16
423	  0	80.0	12.0	 16
424	  0	5483.8	833.0	 16
425	  0	109.5	23.0	 16
426	  0	5101.3	801.8	 16
427	  0	79.0	8.7	 16
428	  0	6141.5	2566.2	 16
429	  0	78.3	16.0	 16
430	  0	5503.5	933.3	 16
431	  0	74.0	13.6	 16
432	  0	5551.5	1024.1	 16
433	  0	87.3	13.9	 16
434	  0	5642.0	1103.1	 16
435	  0	82.0	14.7	 16
436	  0	5667.8	881.5	 16
437	  0	93.3	15.3	 16
438	  0	5886.8	865.4	 16
439	  0	80.0	15.1	 16
440	  0	6070.8	870.8	 16
441	  0	76.8	13.0	 16
442	  0	6008.8	788.1	 16
443	  0	81.3	10.4	 16
444	  0	6224.5	879.4	 16
445	  0	82.0	10.7	 16
446	  0	5928.8	779.3	 16
447	  0	80.3	12.1	 16
448	  0	5768.3	718.3	 16
449	  0	91.8	18.8	 16
450	  0	5963.5	758.6	 16
451	  0	76.3	14.8	 16
452	  0	5935.3	817.1	 16
453	  0	84.5	11.1	 16
454	  0	5921.3	842.3	 16
455	  0	83.3	11.8	 16
456	  0	5850.5	843.2	 16
457	  0	80.0	13.1	 16
458	  0	6158.3	1054.6	 16
459	  0	76.8	15.3	 16
460	  0	5954.0	1070.5	 16
461	  0	72.0	12.5	 16
462	  0	5775.3	764.5	 16
463	  0	72.0	12.5	 16
464	  0	5891.8	714.5	 16
465	  0	94.3	14.4	 16
466	  0	6134.0	631.0	 16
467	  0	89.5	20.1	 16
468	  0	5982.0	505.4	 16
469	  0	95.0	19.4	 16
470	  0	6030.3	479.2	 16
471	  0	83.0	13.0	 16
472	  0	52.5	10.4	 16
473	  0	3088.5	304.7	 16
474	  0	50.5	10.2	 16
475	  0	61.8	13.4	 16
476	  0	53.3	8.7	 16
477	  0	77.0	11.6	 16
478	  0	6157.8	636.5	 16
479	  0	87.5	18.0	 16
480	  0	6088.3	639.0	 16
481	  0	88.0	16.0	 16
482	  0	6128.8	799.2	 16
483	  0	78.5	13.0	 16
484	  0	6096.3	909.6	 16
485	  0	75.8	14.5	 16
486	  0	6108.5	1059.9	 16
487	  0	78.8	16.3	 16
488	  0	6054.0	951.4	 16
489	  0	89.8	14.9	 16
490	  0	6066.3	790.3	 16
491	  0	94.5	13.1	 16
492	  0	6215.3	670.3	 16
493	  0	86.3	17.6	 16
494	  0	6223.8	507.3	 16
495	  0	90.0	15.9	 16
496	  0	6212.8	524.5	 16
497	  0	84.3	12.7	 16
498	  0	6185.5	463.7	 16
499	  0	85.3	15.1	 16
500	  0	5995.8	472.4	 16
501	  0	82.8	14.3	 16
502	  0	5896.8	508.7	 16
503	  0	98.0	14.8	 16
504	  0	6031.0	582.1	 16
505	  0	101.3	17.3	 16
506	  0	6168.8	671.7	 16
507	  0	93.3	13.6	 16
508	  0	6590.5	826.2	 16
509	  0	83.3	12.4	 16
510	  0	6404.8	976.1	 16
511	  0	79.3	12.8	 16
512	  0	6342.3	1076.6	 16
513	  0	78.5	13.7	 16
514	  0	6546.5	953.0	 16
515	  0	86.5	15.9	 16
516	  0	6465.0	910.4	 16
517	  0	87.8	15.1	 16
518	  0	6412.3	740.0	 16
519	  0	86.3	14.3	 16
520	  0	6615.3	691.0	 16
521	  0	87.5	15.0	 16
522	  0	6486.0	665.4	 16
523	  0	91.0	9.9	 16
524	  0	6415.3	552.9	 16
525	  0	87.0	9.1	 16
526	  0	6555.5	646.7	 16
527	  0	84.3	16.9	 16
528	  0	6431.8	731.0	 16
529	  0	98.5	9.7	 16
530	  0	6518.8	725.2	 16
531	  0	96.3	11.5	 16
532	  0	6593.5	877.4	 16
533	  0	83.5	10.5	 16
534	  0	6543.3	927.9	 16
535	  0	84.3	15.3	 20
536	  0	6555.0	1398.9	 16
537	  0	87.3	14.3	 16
538	  0	6500.0	1402.3	 16
539	  0	77.8	11.9	 16
540	  0	6567.0	1514.9	 16
541	  0	90.3	17.4	 16
542	  0	6795.3	1242.4	 16
543	  0	93.3	13.0	 16
544	  0	6693.5	1073.8	 16
545	  0	93.8	16.6	 16
546	  0	6760.5	1071.5	 16
547	  0	86.3	16.1	 16
548	  0	6706.0	1029.1	 16
549	  0	83.8	15.9	 16
550	  0	6589.8	720.2	 16
551	  0	87.3	12.4	 16
552	  0	6528.0	683.2	 16
553	  0	85.8	14.6	 16
554	  0	6487.5	669.3	 16
555	  0	89.8	11.5	 16
556	  0	6488.8	608.4	 16
557	  0	88.0	16.3	 16
558	  0	6615.0	652.3	 16
559	  0	89.8	12.0	 16
560	  0	6520.0	620.6	 16
561	  0	87.5	10.4	 16
562	  0	6516.5	706.3	 16
563	  0	89.0	14.8	 16
564	  0	6624.0	811.0	 16
565	  0	97.3	13.8	 16
566	  0	6579.3	935.8	 16
567	  0	90.5	12.1	 16
568	  0	6687.5	772.3	 16
569	  0	94.8	11.9	 16
570	  0	6681.0	668.7	 16
571	  0	102.0	22.7	 16
572	  0	6655.8	596.0	 16
573	  0	101.0	22.1	 16
574	  0	6638.5	454.7	 16
575	  0	95.0	14.1	 16
576	  0	6465.5	403.5	 16
577	  0	82.3	14.0	 16
578	  0	6672.0	513.9	 16
579	  0	77.8	12.1	 16
580	  0	6838.5	458.8	 16
581	  0	95.3	18.2	 16
582	  0	6912.8	569.7	 16
583	  0	90.3	14.1	 16
584	  0	6872.5	598.8	 16
585	  0	90.0	17.7	 16
586	  0	6830.5	750.2	 16
587	  0	96.5	16.4	 16
588	  0	6620.8	771.4	 16
589	  0	91.5	14.3	 16
590	  0	6672.8	925.8	 16
591	  0	86.8	13.2	 16
592	  0	6834.0	1036.4	 16
593	  0	77.3	10.0	 16
594	  0	6463.5	880.7	 16
595	  0	90.8	15.1	 16
596	  0	6672.0	748.0	 16
597	  0	76.5	15.6	 16
598	  0	6623.8	849.9	 16
599	  0	86.3	11.5	 16
600	  0	6636.8	718.9	 16
601	  0	97.0	21.6	 16
602	  0	6658.3	751.7	 16
603	  0	79.3	10.6	 16
604	  0	6793.0	688.3	 16
605	  0	85.0	16.3	 16
606	  0	6581.5	671.2	 16
607	  0	80.5	12.7	 16
608	  0	6688.5	637.2	 16
609	  0	88.3	12.2	 16
610	  0	6497.0	735.1	 16
611	  0	90.8	13.1	 16
612	  0	6737.0	797.1	 16
613	  0	93.3	15.8	 16
614	  0	6495.0	766.5	 16
615	  0	88.5	11.6	 16
616	  0	6401.3	894.7	 16
617	  0	82.3	11.2	 16
618	  0	6503.3	1039.6	 16
619	  0	84.0	8.4	 16
620	  0	6600.8	871.7	 16
621	  0	85.8	17.1	 16
622	  0	6728.3	940.6	 16
623	  0	85.3	14.5	 16
624	  0	6637.5	924.4	 16
625	  0	87.8	15.5	 16
626	  0	6681.0	973.8	 16
627	  0	93.0	15.1	 16
628	  0	6639.0	1067.9	 16
629	  0	87.5	17.0	 16
630	  0	6582.5	1102.1	 16
631	  0	98.5	17.8	 16
632	  0	6557.3	1166.6	 16
633	  0	91.0	14.4	 16
634	  0	6424.0	1182.2	 16
635	  0	100.3	14.2	 16
636	  0	6654.8	1263.9	 16
637	  0	87.8	15.5	 16
638	  0	6909.8	1344.5	 16
639	  0	99.0	16.5	 16
640	  0	6908.8	1388.9	 16
641	  0	94.3	16.8	 16
642	  0	6885.5	1443.5	 16
643	  0	92.0	19.6	 16
644	  0	6947.0	1603.6	 16
645	  0	94.0	18.3	 16
646	  0	7009.0	1436.0	 16
647	  0	95.3	15.8	 16
648	  0	6921.3	1454.9	 16
649	  0	92.3	18.5	 16
650	  0	6846.0	1372.7	 16
651	  0	95.8	23.2	 16
652	  0	6808.3	1403.6	 16
653	  0	111.8	28.5	 16
654	  0	6603.0	1235.0	 20
655	  0	86.0	15.9	 16
656	  0	6739.8	714.9	 16
657	  0	90.0	13.2	 16
658	  0	6655.3	756.8	 16
659	  0	82.3	13.4	 16
660	  0	7005.8	730.9	 16
661	  0	90.0	13.2	 16
662	  0	6820.8	752.3	 16
663	  0	107.5	22.3	 16
664	  0	6674.0	761.8	 16
665	  0	93.0	11.8	 16
666	  0	6691.3	884.5	 16
667	  0	89.8	15.1	 16
668	  0	6853.8	1056.1	 16
669	  0	100.3	16.4	 16
670	  0	7097.3	1245.2	 16
671	  0	96.5	19.2	 16
672	  0	7148.5	1247.2	 16
673	  0	105.3	20.2	 16
674	  0	7116.8	1008.8	 16
675	  0	88.8	10.1	 16
676	  0	7026.5	817.5	 16
677	  0	85.0	13.0	 16
678	  0	6866.3	644.9	 16
679	  0	99.3	15.9	 16
680	  0	7242.0	678.7	 16
681	  0	94.3	18.5	 16
682	  0	7200.8	612.3	 16
683	  0	94.0	16.4	 16
684	  0	7258.3	586.5	 16
685	  0	97.3	15.0	 16
686	  0	7163.0	672.5	 16
687	  0	93.3	12.9	 16
688	  0	7340.5	790.2	 16
689	  0	87.3	18.0	 16
690	  0	7346.8	924.5	 16
691	  0	91.8	15.1	 16
692	  0	7224.5	1021.7	 16
693	  0	95.3	13.6	 16
694	  0	7463.8	1198.5	 16
695	  0	94.5	12.2	 16
696	  0	7604.5	1380.7	 16
697	  0	102.0	13.3	 16
698	  0	7431.0	1432.9	 16
699	  0	97.8	18.3	 16
700	  0	7300.0	932.4	 16
701	  0	109.0	18.2	 16
702	  0	7507.5	735.7	 16
703	  0	91.3	12.7	 16
704	  0	7634.0	684.7	 16
705	  0	100.3	11.1	 16
706	  0	7969.8	556.4	 16
707	  0	61.5	11.1	 16
708	  0	99.3	15.6	 16
709	  0	8062.8	598.1	 16
710	  0	105.8	17.1	 16
711	  0	8067.3	659.9	 16
  0	  1	8410.8	830.3	 16
  1	  1	112.0	19.2	 16
  2	  1	7788.8	823.1	 16
  3	  1	122.5	21.7	 16
  4	  1	61.0	11.1	 16
  5	  1	198.0	25.6	 16
  6	  1	144.0	25.7	 16
  7	  1	111.3	14.7	 16
  8	  1	224.3	29.9	 16
  9	  1	204.8	31.8	 16
 10	  1	283.5	79.0	 16
 11	  1	166.0	18.6	 16
 12	  1	214.0	27.4	 16
 13	  1	285.5	36.3	 16
 14	  1	282.5	48.1	 16
 15	  1	201.3	26.1	 16
 16	  1	194.8	30.1	 16
 17	  1	159.0	20.7	 16
 18	  1	62.5	7.2	 16
 19	  1	295.8	33.7	 16
 20	  1	715.3	82.5	 16
 21	  1	56.8	10.4	 16
 22	  1	683.3	77.9	 16
 23	  1	83.5	15.4	 16
 24	  1	243.0	35.4	 16
 25	  1	956.0	92.8	 16
 26	  1	459.0	45.8	 16
 27	  1	242.0	24.3	 16
 28	  1	124.0	19.5	 16
 29	  1	303.3	28.3	 16
 30	  1	99.0	19.2	 16
 31	  1	70.3	12.4	 16
 32	  1	88.3	14.4	 16
 33	  1	76.8	18.2	 16
 34	  1	332.3	39.4	 16
 35	  1	125.8	23.4	 16
 36	  1	142.8	19.4	 16
 37	  1	129.3	22.5	 16
 38	  1	462.0	53.6	 16
 39	  1	138.8	22.6	 16
 40	  1	214.8	24.4	 16
 41	  1	95.0	14.9	 16
 42	  1	841.5	89.4	 16
 43	  1	272.8	31.3	 16
 44	  1	113.5	18.6	 16
 45	  1	757.8	36.0	 16
 46	  1	123.0	12.6	 16
 47	  1	291.5	27.9	 16
 48	  1	113.8	19.1	 16
 49	  1	183.5	18.8	 16
 50	  1	144.3	18.4	 16
 51	  1	173.3	21.9	 16
 52	  1	499.5	55.2	 16
 53	  1	104.5	15.3	 16
 54	  1	115.8	19.7	 16
 55	  1	185.3	81.0	 16
 56	  1	148.0	18.2	 16
 57	  1	245.8	33.8	 16
 58	  1	2180.0	222.9	 16
 59	  1	73.5	13.9	 16
 60	  1	110.0	20.5	 16
 61	  1	70.3	8.7	 16
 62	  1	228.0	42.6	 16
 63	  1	73.0	13.6	 20
 64	  1	300.3	58.8	 16
 65	  1	123.3	19.8	 16
 66	  1	418.5	57.2	 16
 67	  1	183.0	27.0	 16
 68	  1	447.0	99.5	 16
 69	  1	64.8	13.7	 16
 70	  1	93.3	10.6	 16
 71	  1	264.8	64.0	 16
 72	  1	156.5	20.3	 16
 73	  1	545.5	83.5	 16
 74	  1	718.0	129.6	 16
 75	  1	67.0	12.6	 16
 76	  1	282.3	54.1	 16
 77	  1	81.0	15.0	 16
 78	  1	218.0	36.1	 16
 79	  1	79.8	14.7	 16
 80	  1	192.0	31.8	 16
 81	  1	100.3	22.9	 16
 82	  1	252.3	44.0	 16
 83	  1	131.0	20.6	 16
 84	  1	105.3	11.9	 16
 85	  1	64.8	9.3	 16
 86	  1	70.3	13.4	 16
 87	  1	602.8	65.8	 16
 88	  1	119.5	14.9	 16
 89	  1	405.3	56.2	 16
 90	  1	137.5	16.2	 16
 91	  1	264.0	43.6	 16
 92	  1	77.8	14.1	 16
 93	  1	165.8	24.7	 16
 94	  1	198.5	20.8	 16
 95	  1	186.5	21.7	 16
 96	  1	66.0	14.3	 16
 97	  1	430.5	48.4	 16
 98	  1	98.5	18.4	 16
 99	  1	253.0	28.3	 16
100	  1	808.8	74.0	 16
101	  1	67.3	9.9	 16
102	  1	67.3	13.1	 16
103	  1	366.5	34.1	 16
104	  1	90.0	14.9	 16
105	  1	169.5	20.8	 16
106	  1	189.3	18.8	 16
107	  1	204.0	29.0	 16
108	  1	119.0	22.3	 16
109	  1	64.3	10.3	 16
110	  1	97.3	17.1	 16
111	  1	367.5	43.7	 16
112	  1	186.0	30.0	 16
113	  1	141.8	24.0	 16
114	  1	236.0	39.8	 16
115	  1	78.3	14.8	 16
116	  1	132.5	19.3	 16
117	  1	153.3	20.5	 16
118	  1	79.0	9.0	 16
119	  1	148.0	15.7	 16
120	  1	732.5	65.5	 16
121	  1	132.5	22.2	 16
122	  1	345.5	33.1	 16
123	  1	129.0	14.5	 16
124	  1	92.5	13.9	 16
125	  1	106.3	17.3	 16
126	  1	110.0	13.5	 16
127	  1	159.8	20.8	 16
128	  1	231.8	28.2	 16
129	  1	71.8	11.3	 16
130	  1	145.3	29.0	 16
131	  1	109.8	14.9	 16
132	  1	131.0	24.3	 16
133	  1	129.5	11.6	 16
134	  1	149.5	17.1	 16
135	  1	122.0	23.8	 16
136	  1	101.8	18.1	 16
137	  1	78.5	11.4	 16
138	  1	91.5	17.1	 16
139	  1	90.0	14.9	 16
140	  1	88.3	13.9	 16
141	  1	83.5	14.8	 16
142	  1	228.0	29.5	 16
143	  1	136.3	21.4	 16
144	  1	383.0	46.4	 16
145	  1	870.0	78.3	 16
146	  1	302.8	34.8	 16
147	  1	72.3	16.7	 16
148	  1	1229.3	122.0	 16
149	  1	96.5	14.9	 16
150	  1	98.3	14.0	 16
151	  1	104.0	17.9	 16
152	  1	339.5	51.7	 16
153	  1	139.3	20.2	 16
154	  1	70.3	12.1	 16
155	  1	64.5	10.1	 16
156	  1	1122.3	123.1	 16
157	  1	334.8	37.3	 16
158	  1	87.8	20.3	 16
159	  1	81.5	11.5	 16
160	  1	117.3	15.2	 16
161	  1	303.3	43.0	 16
162	  1	187.5	21.2	 16
163	  1	341.0	46.8	 16
164	  1	569.0	93.4	 16
165	  1	111.8	13.2	 16
166	  1	138.0	21.7	 16
167	  1	319.3	56.4	 16
168	  1	217.5	50.4	 16
169	  1	60.3	9.6	 16
170	  1	140.8	20.3	 16
171	  1	82.3	15.4	 16
172	  1	444.3	63.7	 16
173	  1	118.8	25.8	 16
174	  1	81.3	11.9	 16
175	  1	3030.5	416.7	 16
176	  1	155.5	19.4	 16
177	  1	229.8	38.6	 16
178	  1	104.8	17.0	 16
179	  1	93.5	19.5	 16
180	  1	124.0	18.4	 16
181	  1	157.8	33.6	 16
182	  1	67.5	11.4	 20
183	  1	192.0	34.6	 16
184	  1	86.0	12.6	 16
185	  1	88.3	16.8	 16
186	  1	118.3	17.6	 16
187	  1	202.0	32.1	 16
188	  1	99.5	16.2	 16
189	  1	1133.3	233.2	 16
190	  1	89.5	20.1	 16
191	  1	95.8	22.6	 16
192	  1	183.3	28.0	 16
193	  1	134.5	19.7	 16
194	  1	142.3	42.7	 16
195	  1	157.5	21.2	 16
196	  1	114.5	17.3	 16
197	  1	74.5	11.6	 16
198	  1	129.5	14.1	 16
199	  1	143.5	18.9	 16
200	  1	174.0	28.7	 16
201	  1	87.3	17.1	 16
202	  1	658.5	54.9	 16
203	  1	146.0	19.9	 16
204	  1	105.8	40.4	 16
205	  1	191.5	35.3	 16
206	  1	565.3	89.4	 16
207	  1	146.3	26.6	 16
208	  1	121.8	28.4	 16
209	  1	109.5	14.7	 16
210	  1	75.3	8.3	 16
211	  1	569.0	82.5	 16
212	  1	86.3	14.4	 16
213	  1	69.8	13.3	 16
214	  1	114.0	16.8	 16
215	  1	122.0	17.6	 16
216	  1	68.5	10.7	 16
217	  1	803.0	110.8	 16
218	  1	182.5	18.9	 16
219	  1	120.3	22.9	 16
220	  1	67.0	11.2	 16
221	  1	240.0	34.5	 16
222	  1	91.5	17.9	 16
223	  1	837.8	155.0	 16
224	  1	64.5	10.1	 16
225	  1	59.3	8.9	 16
226	  1	243.3	30.1	 16
227	  1	120.3	19.1	 16
228	  1	620.0	58.0	 16
229	  1	319.8	29.7	 16
230	  1	289.0	20.3	 16
231	  1	192.8	29.2	 16
232	  1	84.3	14.7	 16
233	  1	108.3	19.2	 16
234	  1	105.5	18.3	 16
235	  1	48.8	8.2	 16
236	  1	393.0	45.5	 16
237	  1	47.0	8.6	 16
238	  1	56.0	10.7	 16
239	  1	45.0	7.8	 16
240	  1	135.3	18.3	 16
241	  1	93.0	12.0	 16
242	  1	79.3	19.8	 16
243	  1	178.0	29.1	 16
244	  1	146.8	18.8	 16
245	  1	123.5	12.8	 16
246	  1	132.0	18.2	 16
247	  1	126.8	64.3	 16
248	  1	61.5	11.4	 16
249	  1	70.3	11.0	 16
250	  1	75.3	18.6	 16
251	  1	69.5	15.4	 16
252	  1	58.5	14.6	 16
253	  1	315.3	43.4	 16
254	  1	58.0	12.4	 16
255	  1	60.3	9.5	 16
256	  1	480.5	32.8	 16
257	  1	65.3	15.8	 16
258	  1	81.0	12.3	 16
259	  1	321.0	40.0	 16
260	  1	68.3	13.2	 16
261	  1	297.8	30.7	 16
262	  1	78.0	9.9	 16
263	  1	85.5	10.6	 16
264	  1	120.0	18.6	 16
265	  1	293.8	27.7	 16
266	  1	68.3	12.8	 16
267	  1	106.8	17.4	 16
268	  1	173.0	25.8	 16
269	  1	64.3	9.7	 16
270	  1	66.3	10.6	 16
271	  1	69.0	11.7	 16
272	  1	76.0	17.2	 16
273	  1	1287.3	226.1	 16
274	  1	79.8	15.7	 16
275	  1	157.0	30.3	 16
276	  1	1515.8	289.3	 16
277	  1	94.5	20.3	 16
278	  1	73.3	12.1	 16
279	  1	199.5	29.6	 16
280	  1	64.8	8.8	 16
281	  1	232.0	33.8	 16
282	  1	178.8	32.1	 16
283	  1	141.0	17.1	 16
284	  1	81.3	13.9	 16
285	  1	146.0	20.6	 16
286	  1	144.5	20.5	 16
287	  1	107.3	16.1	 16
288	  1	119.0	16.0	 16
289	  1	134.3	13.9	 16
290	  1	135.3	19.2	 16
291	  1	61.8	6.5	 16
292	  1	215.5	33.9	 16
293	  1	182.0	24.4	 16
294	  1	105.0	12.1	 16
295	  1	88.5	13.3	 16
296	  1	69.8	10.2	 16
297	  1	82.0	16.1	 16
298	  1	185.3	26.6	 16
299	  1	62.0	14.0	 16
300	  1	71.5	12.9	 20
301	  1	59.5	11.8	 16
302	  1	72.8	14.3	 16
303	  1	162.3	17.4	 16
304	  1	53.5	7.3	 16
305	  1	404.0	77.0	 16
306	  1	283.0	43.6	 16
307	  1	57.5	8.1	 16
308	  1	95.0	14.4	 16
309	  1	122.5	13.8	 16
310	  1	155.3	24.7	 16
311	  1	643.0	104.9	 16
312	  1	152.3	20.0	 16
313	  1	94.0	14.1	 16
314	  1	976.3	154.6	 16
315	  1	233.3	34.3	 16
316	  1	84.5	17.7	 16
317	  1	120.0	20.9	 16
318	  1	94.8	28.3	 16
319	  1	111.5	18.1	 16
320	  1	107.0	15.3	 16
321	  1	195.5	33.4	 16
322	  1	99.0	15.9	 16
323	  1	163.3	27.5	 16
324	  1	171.8	26.0	 16
325	  1	73.8	15.1	 16
326	  1	123.0	20.7	 16
327	  1	71.0	13.0	 16
328	  1	108.8	15.5	 16
329	  1	343.3	64.2	 16
330	  1	100.5	17.0	 16
331	  1	160.5	24.4	 16
332	  1	481.5	70.3	 16
333	  1	301.5	35.7	 16
334	  1	96.0	21.5	 16
335	  1	2090.8	172.1	 16
336	  1	98.0	12.4	 16
337	  1	567.0	71.1	 16
338	  1	75.5	11.9	 16
339	  1	67.3	11.7	 16
340	  1	323.8	45.1	 16
341	  1	145.5	22.0	 16
342	  1	157.3	21.5	 16
343	  1	103.8	17.1	 16
344	  1	113.3	16.7	 16
345	  1	415.8	57.3	 16
346	  1	94.8	18.7	 16
347	  1	289.8	29.5	 16
348	  1	312.5	38.3	 16
349	  1	164.0	22.8	 16
350	  1	82.0	14.9	 16
351	  1	63.3	8.8	 16
352	  1	154.8	19.2	 16
353	  1	114.0	22.9	 16
354	  1	8186.3	1504.2	 16
355	  1	1050.3	202.2	 16
356	  1	862.8	63.4	 16
357	  1	77.3	18.1	 16
358	  1	97.3	13.4	 16
359	  1	94.3	14.5	 16
360	  1	63.0	12.9	 16
361	  1	49.8	11.1	 16
362	  1	71.3	11.0	 16
363	  1	80.3	15.1	 16
364	  1	73.3	15.5	 16
365	  1	59.8	10.0	 16
366	  1	204.5	29.6	 16
367	  1	158.3	20.4	 16
368	  1	594.0	58.9	 16
369	  1	75.8	12.2	 16
370	  1	78.5	9.9	 16
371	  1	7757.5	878.0	 16
372	  1	91.3	11.8	 16
373	  1	1013.0	141.4	 16
374	  1	122.0	19.8	 16
375	  1	106.3	17.5	 16
376	  1	113.3	18.4	 16
377	  1	184.5	22.5	 16
378	  1	299.3	53.1	 16
379	  1	360.3	54.1	 16
380	  1	102.5	19.3	 16
381	  1	160.0	31.2	 16
382	  1	316.3	41.9	 16
383	  1	368.5	35.6	 16
384	  1	197.8	29.2	 16
385	  1	79.3	12.2	 16
386	  1	126.3	27.6	 16
387	  1	82.3	10.3	 16
388	  1	55.0	9.7	 16
389	  1	65.8	16.3	 16
390	  1	131.3	18.6	 16
391	  1	83.0	12.9	 16
392	  1	78.5	13.8	 16
393	  1	59.3	8.3	 16
394	  1	87.0	16.6	 16
395	  1	221.0	21.2	 16
396	  1	247.3	20.1	 16
397	  1	187.0	28.5	 16
398	  1	119.8	18.7	 16
399	  1	129.3	16.1	 16
400	  1	133.3	14.5	 16
401	  1	87.8	12.8	 16
402	  1	189.3	32.7	 16
403	  1	201.3	27.9	 16
404	  1	671.3	59.0	 16
405	  1	704.0	78.7	 16
406	  1	142.5	19.4	 16
407	  1	115.5	16.4	 16
408	  1	166.0	19.6	 16
409	  1	139.3	14.5	 16
410	  1	99.5	15.8	 16
411	  1	267.0	40.4	 16
412	  1	369.0	56.8	 16
413	  1	148.5	21.4	 16
414	  1	94.5	15.1	 16
415	  1	81.5	14.3	 16
416	  1	83.5	16.5	 16
417	  1	485.5	46.4	 16
418	  1	97.8	12.6	 16
419	  1	100.5	10.9	 20
420	  1	279.0	38.4	 16
421	  1	101.0	15.7	 16
422	  1	163.0	26.4	 16
423	  1	244.0	22.7	 16
424	  1	116.3	20.8	 16
425	  1	100.8	14.3	 16
426	  1	248.0	37.3	 16
427	  1	112.5	20.5	 16
428	  1	63.8	12.7	 16
429	  1	435.5	70.3	 16
430	  1	56.5	15.3	 16
431	  1	149.5	23.7	 16
432	  1	118.5	19.9	 16
433	  1	175.0	28.5	 16
434	  1	253.5	44.5	 16
435	  1	103.8	17.2	 16
436	  1	90.3	12.4	 16
437	  1	59.0	16.8	 16
438	  1	98.0	18.8	 16
439	  1	510.3	82.7	 16
440	  1	61.3	8.2	 16
441	  1	120.5	23.4	 16
442	  1	290.3	56.1	 16
443	  1	125.0	25.0	 16
444	  1	71.5	11.3	 16
445	  1	87.8	14.6	 16
446	  1	86.3	14.9	 16
447	  1	61.5	10.8	 16
448	  1	138.0	14.1	 16
449	  1	67.3	11.9	 16
450	  1	75.3	9.6	 16
451	  1	122.0	20.8	 16
452	  1	373.8	30.3	 16
453	  1	377.5	59.0	 16
454	  1	118.8	18.9	 16
455	  1	72.3	13.6	 16
456	  1	656.8	64.5	 16
457	  1	834.3	102.3	 16
458	  1	99.5	16.5	 16
459	  1	88.8	19.1	 16
460	  1	309.0	27.1	 16
461	  1	144.3	20.0	 16
462	  1	60.0	10.2	 16
463	  1	110.8	16.2	 16
464	  1	151.0	24.0	 16
465	  1	588.5	47.5	 16
466	  1	234.3	28.0	 16
467	  1	240.8	22.4	 16
468	  1	176.5	24.9	 16
469	  1	87.0	11.9	 16
470	  1	243.3	25.7	 16
471	  1	61.3	47.8	 16
472	  1	45.0	10.6	 16
473	  1	855.5	76.2	 16
474	  1	39.3	8.0	 16
475	  1	64.3	10.1	 16
476	  1	46.3	8.2	 16
477	  1	269.8	29.5	 16
478	  1	226.3	33.5	 16
479	  1	72.0	12.3	 16
480	  1	77.3	34.5	 16
481	  1	59.5	9.0	 16
482	  1	1204.5	147.9	 16
483	  1	154.0	23.7	 16
484	  1	100.5	20.4	 16
485	  1	283.5	54.1	 16
486	  1	68.3	15.4	 16
487	  1	55.8	9.1	 16
488	  1	56.0	9.3	 16
489	  1	91.3	12.7	 16
490	  1	289.5	30.5	 16
491	  1	109.3	17.2	 16
492	  1	60.0	13.7	 16
493	  1	154.0	23.9	 16
494	  1	141.0	20.1	 16
495	  1	137.3	17.4	 16
496	  1	210.0	20.8	 16
497	  1	154.8	35.0	 16
498	  1	61.3	8.7	 16
499	  1	65.3	8.9	 16
500	  1	70.3	18.7	 16
501	  1	212.8	27.8	 16
502	  1	493.3	48.8	 16
503	  1	88.0	13.6	 16
504	  1	97.3	14.6	 16
505	  1	72.8	12.6	 16
506	  1	251.5	22.1	 16
507	  1	101.3	15.1	 16
508	  1	104.8	14.8	 16
509	  1	141.0	18.9	 16
510	  1	404.8	55.0	 16
511	  1	150.3	24.7	 16
512	  1	95.0	16.1	 16
513	  1	1271.3	294.2	 16
514	  1	70.0	9.9	 16
515	  1	351.3	34.8	 16
516	  1	112.0	16.5	 16
517	  1	134.3	21.0	 16
518	  1	775.0	74.1	 16
519	  1	1082.0	98.1	 16
520	  1	150.5	20.3	 16
521	  1	53.5	8.6	 16
522	  1	1751.8	161.2	 16
523	  1	221.0	38.8	 16
524	  1	385.5	48.9	 16
525	  1	373.3	30.0	 16
526	  1	180.0	20.4	 16
527	  1	151.0	26.0	 16
528	  1	78.3	9.8	 16
529	  1	369.5	55.5	 16
530	  1	1792.0	291.3	 16
531	  1	64.8	7.2	 16
532	  1	61.3	11.3	 16
533	  1	92.3	17.4	 16
534	  1	169.5	30.4	 16
535	  1	316.5	65.0	 16
536	  1	79.5	19.4	 16
537	  1	69.5	17.1	 16
538	  1	100.0	39.1	 20
539	  1	63.3	10.5	 16
540	  1	135.3	12.1	 16
541	  1	95.3	14.4	 16
542	  1	1015.5	138.1	 16
543	  1	144.3	18.2	 16
544	  1	231.5	25.1	 16
545	  1	78.0	11.3	 16
546	  1	600.0	85.9	 16
547	  1	446.0	56.9	 16
548	  1	67.8	13.6	 16
549	  1	64.0	10.1	 16
550	  1	397.3	60.9	 16
551	  1	120.8	19.1	 16
552	  1	76.0	12.2	 16
553	  1	248.8	29.8	 16
554	  1	63.8	12.6	 16
555	  1	76.3	12.4	 16
556	  1	76.0	12.1	 16
557	  1	227.3	25.4	 16
558	  1	142.8	20.3	 16
559	  1	1069.0	141.4	 16
560	  1	4438.5	422.1	 16
561	  1	113.3	26.7	 16
562	  1	916.3	144.8	 16
563	  1	103.8	15.7	 16
564	  1	126.0	17.4	 16
565	  1	101.0	17.7	 16
566	  1	398.8	65.8	 16
567	  1	69.5	10.8	 16
568	  1	1737.8	138.9	 16
569	  1	251.5	29.9	 16
570	  1	61.8	13.0	 16
571	  1	66.0	13.6	 16
572	  1	50.0	8.5	 16
573	  1	133.0	21.3	 16
574	  1	60.8	13.4	 16
575	  1	55.0	7.6	 16
576	  1	94.0	17.3	 16
577	  1	137.0	18.4	 16
578	  1	176.0	29.4	 16
579	  1	194.5	31.5	 16
580	  1	180.3	21.3	 16
581	  1	59.3	10.1	 16
582	  1	253.0	33.1	 16
583	  1	266.8	32.0	 16
584	  1	253.0	34.6	 16
585	  1	899.8	108.7	 16
586	  1	131.3	16.8	 16
587	  1	84.5	16.4	 16
588	  1	116.0	18.3	 16
589	  1	157.3	33.5	 16
590	  1	167.5	23.1	 16
591	  1	74.8	17.4	 16
592	  1	1170.0	194.8	 16
593	  1	80.8	10.6	 16
594	  1	78.3	16.2	 16
595	  1	67.3	10.0	 16
596	  1	184.3	32.5	 16
597	  1	197.3	21.5	 16
598	  1	203.5	28.6	 16
599	  1	200.5	27.8	 16
600	  1	198.0	24.7	 16
601	  1	163.0	22.1	 16
602	  1	169.3	16.3	 16
603	  1	243.5	34.2	 16
604	  1	1257.0	161.4	 16
605	  1	62.0	10.8	 16
606	  1	160.5	26.5	 16
607	  1	219.3	37.3	 16
608	  1	459.3	63.4	 16
609	  1	7642.3	998.0	 16
610	  1	287.5	39.5	 16
611	  1	770.0	122.1	 16
612	  1	85.5	18.5	 16
613	  1	203.8	26.9	 16
614	  1	82.3	14.6	 16
615	  1	150.0	34.0	 16
616	  1	420.0	73.6	 16
617	  1	286.8	42.6	 16
618	  1	239.0	47.9	 16
619	  1	86.0	12.0	 16
620	  1	98.8	13.7	 16
621	  1	109.0	16.3	 16
622	  1	113.3	21.5	 16
623	  1	367.0	55.7	 16
624	  1	117.5	17.1	 16
625	  1	120.0	16.6	 16
626	  1	625.0	84.7	 16
627	  1	448.8	70.0	 16
628	  1	394.3	38.2	 16
629	  1	148.8	22.2	 16
630	  1	229.0	35.1	 16
631	  1	1424.0	253.1	 16
632	  1	1343.3	214.5	 16
633	  1	1477.3	90.4	 16
634	  1	83.0	13.3	 16
635	  1	80.3	13.0	 16
636	  1	94.0	11.0	 16
637	  1	170.5	27.5	 16
638	  1	84.0	20.4	 16
639	  1	277.5	54.0	 16
640	  1	99.0	15.3	 16
641	  1	150.8	24.2	 16
642	  1	84.3	11.8	 16
643	  1	890.0	199.3	 16
644	  1	1542.3	308.8	 16
645	  1	71.0	11.0	 16
646	  1	62.3	10.4	 16
647	  1	124.3	19.8	 16
648	  1	90.5	18.3	 16
649	  1	93.0	17.5	 16
650	  1	102.5	17.9	 16
651	  1	62.3	17.0	 16
652	  1	632.5	128.4	 16
653	  1	92.8	16.2	 16
654	  1	88.3	11.4	 16
655	  1	488.5	94.9	 16
656	  1	69.3	12.3	 20
657	  1	271.5	23.7	 16
658	  1	68.0	9.3	 16
659	  1	406.8	44.3	 16
660	  1	87.0	13.4	 16
661	  1	67.8	13.6	 16
662	  1	81.0	16.4	 16
663	  1	352.3	53.1	 16
664	  1	359.5	46.6	 16
665	  1	68.5	13.7	 16
666	  1	72.3	19.3	 16
667	  1	1362.5	75.8	 16
668	  1	226.5	29.7	 16
669	  1	217.0	27.2	 16
670	  1	86.3	13.2	 16
671	  1	76.3	10.1	 16
672	  1	182.8	26.6	 16
673	  1	200.0	28.2	 16
674	  1	149.5	17.6	 16
675	  1	409.5	35.0	 16
676	  1	371.3	51.0	 16
677	  1	83.3	14.5	 16
678	  1	95.0	13.2	 16
679	  1	98.3	17.7	 16
680	  1	3056.3	235.2	 16
681	  1	71.8	14.0	 16
682	  1	347.5	50.5	 16
683	  1	140.8	16.3	 16
684	  1	894.0	78.7	 16
685	  1	129.3	17.6	 16
686	  1	221.0	32.6	 16
687	  1	1051.5	123.3	 16
688	  1	108.0	15.4	 16
689	  1	152.3	25.8	 16
690	  1	119.3	15.7	 16
691	  1	2660.3	420.2	 16
692	  1	2242.3	336.4	 16
693	  1	90.5	13.2	 16
694	  1	141.3	20.4	 16
695	  1	65.5	10.5	 16
696	  1	72.8	23.9	 16
697	  1	68.3	13.8	 16
698	  1	79.0	20.3	 16
699	  1	148.3	24.6	 16
700	  1	73.5	12.0	 16
701	  1	81.5	16.8	 16
702	  1	163.5	21.9	 16
703	  1	196.0	23.8	 16
704	  1	183.3	18.7	 16
705	  1	141.3	20.9	 16
706	  1	69.5	9.7	 16
707	  1	63.3	11.1	 16
708	  1	10669.0	6928.6	 16
709	  1	108.8	22.5	 16
710	  1	7803.0	624.8	 16
711	  1	96.5	15.8	 16
  0	  2	105.0	19.5	 16
  1	  2	7949.8	970.9	 16
  2	  2	110.3	23.7	 16
  3	  2	7961.3	1018.4	 16
  4	  2	63.5	11.8	 16
  5	  2	201.5	33.9	 16
  6	  2	110.0	19.1	 16
  7	  2	78.5	14.4	 16
  8	  2	167.8	20.2	 16
  9	  2	91.0	11.8	 16
 10	  2	115.0	14.4	 16
 11	  2	167.0	24.5	 16
 12	  2	196.8	31.6	 16
 13	  2	405.5	65.1	 16
 14	  2	522.0	39.1	 16
 15	  2	461.8	57.0	 16
 16	  2	300.8	26.2	 16
 17	  2	111.8	16.7	 16
 18	  2	70.8	15.2	 16
 19	  2	299.0	36.0	 16
 20	  2	85.3	15.9	 16
 21	  2	62.3	9.1	 16
 22	  2	86.3	11.0	 16
 23	  2	72.0	14.7	 16
 24	  2	354.3	35.9	 16
 25	  2	907.0	71.2	 16
 26	  2	87.3	15.4	 16
 27	  2	231.0	21.2	 16
 28	  2	196.3	22.5	 16
 29	  2	209.0	34.4	 16
 30	  2	112.8	20.0	 16
 31	  2	66.8	10.9	 16
 32	  2	119.8	19.3	 16
 33	  2	82.5	18.1	 16
 34	  2	447.0	44.0	 16
 35	  2	84.8	12.9	 16
 36	  2	301.8	46.5	 16
 37	  2	96.3	13.8	 16
 38	  2	119.0	27.1	 16
 39	  2	191.8	19.6	 16
 40	  2	203.5	30.3	 16
 41	  2	110.3	13.7	 16
 42	  2	235.5	27.4	 16
 43	  2	175.8	30.5	 16
 44	  2	90.3	12.9	 16
 45	  2	337.3	41.8	 16
 46	  2	96.5	14.4	 16
 47	  2	209.0	26.6	 16
 48	  2	107.0	11.1	 16
 49	  2	180.3	21.2	 16
 50	  2	132.0	20.4	 16
 51	  2	167.3	29.5	 16
 52	  2	231.0	22.2	 16
 53	  2	148.3	25.0	 16
 54	  2	170.5	25.8	 16
 55	  2	160.8	16.9	 16
 56	  2	191.5	25.5	 16
 57	  2	273.5	28.5	 16
 58	  2	527.0	65.5	 16
 59	  2	60.5	11.5	 16
 60	  2	113.0	18.2	 16
 61	  2	71.3	12.2	 16
 62	  2	90.0	14.8	 16
 63	  2	76.5	11.1	 16
 64	  2	103.0	16.2	 16
 65	  2	156.5	29.6	 16
 66	  2	156.8	20.6	 20
 67	  2	129.5	12.6	 16
 68	  2	234.3	55.4	 16
 69	  2	68.5	11.3	 16
 70	  2	81.0	14.7	 16
 71	  2	98.0	17.5	 16
 72	  2	82.5	11.1	 16
 73	  2	147.8	28.2	 16
 74	  2	158.0	30.6	 16
 75	  2	67.8	16.2	 16
 76	  2	80.0	13.0	 16
 77	  2	74.0	10.2	 16
 78	  2	78.8	6.0	 16
 79	  2	73.5	14.5	 16
 80	  2	66.5	10.7	 16
 81	  2	122.8	21.6	 16
 82	  2	290.3	45.3	 16
 83	  2	108.3	12.2	 16
 84	  2	113.5	25.5	 16
 85	  2	56.5	12.0	 16
 86	  2	67.3	13.0	 16
 87	  2	209.8	46.7	 16
 88	  2	78.3	10.9	 16
 89	  2	360.5	38.2	 16
 90	  2	80.5	14.6	 16
 91	  2	96.3	15.6	 16
 92	  2	68.3	12.8	 16
 93	  2	92.3	18.3	 16
 94	  2	100.3	17.1	 16
 95	  2	176.0	20.6	 16
 96	  2	67.8	9.6	 16
 97	  2	73.0	15.3	 16
 98	  2	82.5	14.0	 16
 99	  2	253.5	29.5	 16
100	  2	312.0	24.0	 16
101	  2	69.5	14.5	 16
102	  2	66.5	12.8	 16
103	  2	79.0	12.2	 16
104	  2	75.5	14.5	 16
105	  2	507.3	42.5	 16
106	  2	72.0	12.3	 16
107	  2	71.3	12.0	 16
108	  2	75.5	10.1	 16
109	  2	56.3	16.2	 16
110	  2	84.0	20.3	 16
111	  2	170.3	17.8	 16
112	  2	167.5	24.3	 16
113	  2	75.3	11.2	 16
114	  2	94.8	18.0	 16
115	  2	77.0	12.4	 16
116	  2	114.5	19.7	 16
117	  2	111.0	15.4	 16
118	  2	65.5	13.9	 16
119	  2	201.5	32.0	 16
120	  2	110.8	16.5	 16
121	  2	87.3	9.8	 16
122	  2	67.0	10.5	 16
123	  2	80.5	15.2	 16
124	  2	68.3	6.5	 16
125	  2	141.5	28.9	 16
126	  2	98.8	14.3	 16
127	  2	274.0	36.4	 16
128	  2	331.5	33.9	 16
129	  2	56.3	9.0	 16
130	  2	186.0	23.2	 16
131	  2	109.0	19.4	 16
132	  2	171.8	16.8	 16
133	  2	226.5	31.8	 16
134	  2	136.3	11.7	 16
135	  2	77.0	17.0	 16
136	  2	92.5	25.1	 16
137	  2	65.0	9.0	 16
138	  2	63.5	12.0	 16
139	  2	74.8	13.7	 16
140	  2	65.8	10.0	 16
141	  2	63.3	12.8	 16
142	  2	322.8	24.0	 16
143	  2	112.8	14.2	 16
144	  2	280.3	22.5	 16
145	  2	73.3	14.3	 16
146	  2	108.5	14.0	 16
147	  2	80.3	12.5	 16
148	  2	325.3	22.3	 16
149	  2	93.8	15.4	 16
150	  2	61.5	12.6	 16
151	  2	83.3	12.3	 16
152	  2	104.3	20.8	 16
153	  2	90.0	16.6	 16
154	  2	55.3	8.2	 16
155	  2	78.0	11.3	 16
156	  2	232.0	37.2	 16
157	  2	207.5	35.8	 16
158	  2	63.3	8.0	 16
159	  2	133.0	25.5	 16
160	  2	235.3	28.8	 16
161	  2	224.0	29.1	 16
162	  2	66.0	15.0	 16
163	  2	111.8	21.1	 16
164	  2	134.5	21.1	 16
165	  2	91.3	15.0	 16
166	  2	124.3	25.2	 16
167	  2	242.8	23.7	 16
168	  2	62.3	9.2	 16
169	  2	50.5	10.9	 16
170	  2	156.0	30.2	 16
171	  2	62.8	12.4	 16
172	  2	104.3	18.1	 16
173	  2	73.8	13.8	 16
174	  2	80.3	12.6	 16
175	  2	626.8	111.4	 16
176	  2	117.8	16.8	 16
177	  2	62.3	9.1	 16
178	  2	150.5	20.7	 16
179	  2	108.3	16.9	 16
180	  2	72.8	12.7	 16
181	  2	73.8	12.6	 16
182	  2	69.5	15.0	 16
183	  2	81.0	19.4	 16
184	  2	82.5	16.1	 16
185	  2	63.0	11.0	 20
186	  2	79.3	15.6	 16
187	  2	126.8	19.1	 16
188	  2	86.5	14.8	 16
189	  2	188.3	35.2	 16
190	  2	129.8	23.8	 16
191	  2	81.3	10.4	 16
192	  2	167.0	19.2	 16
193	  2	459.8	68.9	 16
194	  2	116.0	18.0	 16
195	  2	166.5	17.8	 16
196	  2	129.3	25.3	 16
197	  2	71.5	16.1	 16
198	  2	71.5	13.6	 16
199	  2	185.0	35.4	 16
200	  2	101.5	16.8	 16
201	  2	57.5	8.5	 16
202	  2	182.0	17.9	 16
203	  2	119.0	21.1	 16
204	  2	54.3	7.3	 16
205	  2	79.0	15.8	 16
206	  2	123.8	18.4	 16
207	  2	111.0	19.8	 16
208	  2	63.5	13.7	 16
209	  2	78.5	18.9	 16
210	  2	62.3	9.6	 16
211	  2	74.0	11.2	 16
212	  2	58.3	12.9	 16
213	  2	70.3	13.8	 16
214	  2	118.0	14.4	 16
215	  2	101.3	18.0	 16
216	  2	88.8	17.8	 16
217	  2	286.8	43.3	 16
218	  2	290.8	31.5	 16
219	  2	99.8	13.6	 16
220	  2	55.0	7.2	 16
221	  2	162.5	21.3	 16
222	  2	84.3	29.0	 16
223	  2	145.0	20.1	 16
224	  2	57.0	9.4	 16
225	  2	58.3	14.0	 16
226	  2	80.8	17.5	 16
227	  2	93.0	19.0	 16
228	  2	108.5	18.8	 16
229	  2	63.0	8.8	 16
230	  2	196.0	21.9	 16
231	  2	66.3	12.0	 16
232	  2	61.3	6.9	 16
233	  2	65.8	15.0	 16
234	  2	72.0	18.4	 16
235	  2	44.3	6.2	 16
236	  2	174.8	22.4	 16
237	  2	44.0	8.6	 16
238	  2	57.3	8.5	 16
239	  2	47.3	10.6	 16
240	  2	91.3	15.8	 16
241	  2	75.8	14.9	 16
242	  2	70.5	15.2	 16
243	  2	102.5	14.8	 16
244	  2	139.0	21.2	 16
245	  2	138.0	14.7	 16
246	  2	173.8	23.9	 16
247	  2	170.5	21.0	 16
248	  2	58.0	9.0	 16
249	  2	65.8	10.0	 16
250	  2	64.0	11.2	 16
251	  2	61.0	9.5	 16
252	  2	62.3	12.7	 16
253	  2	77.0	9.8	 16
254	  2	54.5	9.5	 16
255	  2	57.5	9.1	 16
256	  2	128.8	16.6	 16
257	  2	53.3	8.4	 16
258	  2	99.5	17.2	 16
259	  2	63.3	9.7	 16
260	  2	61.3	11.5	 16
261	  2	121.0	17.4	 16
262	  2	66.0	10.4	 16
263	  2	98.0	18.4	 16
264	  2	146.5	23.7	 16
265	  2	83.0	11.2	 16
266	  2	53.0	5.6	 16
267	  2	305.3	35.3	 16
268	  2	314.5	26.5	 16
269	  2	60.0	15.7	 16
270	  2	77.0	14.8	 16
271	  2	57.3	10.2	 16
272	  2	68.5	9.9	 16
273	  2	305.8	26.6	 16
274	  2	55.5	12.1	 16
275	  2	145.3	31.2	 16
276	  2	298.5	32.7	 16
277	  2	76.0	23.5	 16
278	  2	96.3	16.3	 16
279	  2	401.8	37.5	 16
280	  2	72.3	12.2	 16
281	  2	88.3	11.3	 16
282	  2	88.0	17.2	 16
283	  2	148.3	20.9	 16
284	  2	61.3	11.2	 16
285	  2	108.0	15.7	 16
286	  2	114.5	19.5	 16
287	  2	77.5	14.9	 16
288	  2	68.3	9.7	 16
289	  2	118.5	19.8	 16
290	  2	110.3	13.2	 16
291	  2	62.5	12.6	 16
292	  2	414.5	43.0	 16
293	  2	252.5	29.0	 16
294	  2	95.3	22.5	 16
295	  2	80.0	13.0	 16
296	  2	71.8	13.0	 16
297	  2	73.5	13.3	 16
298	  2	139.0	19.1	 16
299	  2	71.8	12.5	 16
300	  2	56.3	9.5	 16
301	  2	68.0	16.4	 16
302	  2	60.5	9.7	 16
303	  2	154.0	24.8	 20
304	  2	57.3	8.4	 16
305	  2	82.0	12.4	 16
306	  2	78.5	19.3	 16
307	  2	75.5	14.5	 16
308	  2	76.8	19.6	 16
309	  2	105.0	19.0	 16
310	  2	61.0	4.8	 16
311	  2	151.3	23.8	 16
312	  2	59.5	6.7	 16
313	  2	98.3	14.7	 16
314	  2	141.5	19.5	 16
315	  2	88.8	11.2	 16
316	  2	62.3	12.5	 16
317	  2	116.8	17.7	 16
318	  2	74.5	12.4	 16
319	  2	102.0	13.9	 16
320	  2	114.3	14.6	 16
321	  2	132.3	17.9	 16
322	  2	74.5	15.6	 16
323	  2	72.0	17.8	 16
324	  2	89.0	12.1	 16
325	  2	68.3	10.8	 16
326	  2	71.3	13.6	 16
327	  2	69.8	15.3	 16
328	  2	101.3	16.1	 16
329	  2	750.3	54.5	 16
330	  2	102.3	13.7	 16
331	  2	110.3	14.8	 16
332	  2	64.3	13.7	 16
333	  2	149.8	21.9	 16
334	  2	110.0	16.7	 16
335	  2	204.3	31.1	 16
336	  2	111.8	19.8	 16
337	  2	142.3	19.8	 16
338	  2	56.0	12.2	 16
339	  2	58.3	15.5	 16
340	  2	58.8	11.4	 16
341	  2	65.3	12.3	 16
342	  2	136.0	21.5	 16
343	  2	105.3	13.1	 16
344	  2	100.3	15.2	 16
345	  2	391.8	59.2	 16
346	  2	113.5	15.8	 16
347	  2	235.3	26.1	 16
348	  2	425.3	38.9	 16
349	  2	433.3	55.4	 16
350	  2	69.8	10.3	 16
351	  2	67.3	11.8	 16
352	  2	139.0	19.0	 16
353	  2	69.8	10.7	 16
354	  2	2636.3	286.5	 16
355	  2	228.3	35.9	 16
356	  2	295.8	34.7	 16
357	  2	122.8	16.2	 16
358	  2	72.3	11.5	 16
359	  2	82.3	9.5	 16
360	  2	66.5	14.1	 16
361	  2	54.5	9.9	 16
362	  2	54.0	9.3	 16
363	  2	69.3	8.6	 16
364	  2	64.3	10.9	 16
365	  2	59.8	11.4	 16
366	  2	75.0	25.4	 16
367	  2	62.0	9.8	 16
368	  2	77.3	10.8	 16
369	  2	68.0	10.4	 16
370	  2	60.0	9.5	 16
371	  2	2081.0	211.8	 16
372	  2	80.5	15.9	 16
373	  2	130.3	20.4	 16
374	  2	87.3	14.3	 16
375	  2	59.8	11.8	 16
376	  2	114.5	17.2	 16
377	  2	69.0	13.4	 16
378	  2	99.3	18.5	 16
379	  2	108.8	12.4	 16
380	  2	76.3	13.4	 16
381	  2	89.5	21.0	 16
382	  2	162.0	21.5	 16
383	  2	160.0	17.2	 16
384	  2	97.5	16.7	 16
385	  2	74.0	12.3	 16
386	  2	57.0	9.1	 16
387	  2	73.3	15.3	 16
388	  2	49.5	9.7	 16
389	  2	55.3	7.4	 16
390	  2	68.5	12.1	 16
391	  2	81.3	11.9	 16
392	  2	67.3	14.5	 16
393	  2	66.0	12.5	 16
394	  2	63.3	10.6	 16
395	  2	120.0	21.4	 16
396	  2	216.5	22.5	 16
397	  2	71.8	9.0	 16
398	  2	133.3	15.6	 16
399	  2	78.5	16.2	 16
400	  2	142.8	18.4	 16
401	  2	70.5	12.4	 16
402	  2	135.0	19.2	 16
403	  2	148.8	23.0	 16
404	  2	601.0	51.5	 16
405	  2	859.3	65.5	 16
406	  2	140.3	16.2	 16
407	  2	124.0	20.8	 16
408	  2	134.8	16.7	 16
409	  2	71.3	9.2	 16
410	  2	97.0	15.4	 16
411	  2	103.8	12.2	 16
412	  2	338.0	39.9	 16
413	  2	166.0	14.5	 16
414	  2	310.0	34.4	 16
415	  2	93.5	18.3	 16
416	  2	78.0	9.7	 16
417	  2	107.3	22.2	 16
418	  2	132.3	16.6	 16
419	  2	80.8	13.9	 16
420	  2	161.3	22.2	 16
421	  2	111.3	15.0	 16
422	  2	170.5	26.0	 20
423	  2	376.8	41.1	 16
424	  2	60.8	12.9	 16
425	  2	82.5	10.6	 16
426	  2	80.0	16.5	 16
427	  2	67.3	14.5	 16
428	  2	63.3	12.0	 16
429	  2	73.8	14.3	 16
430	  2	55.8	8.3	 16
431	  2	117.3	16.0	 16
432	  2	103.0	13.8	 16
433	  2	130.0	15.4	 16
434	  2	159.3	22.3	 16
435	  2	65.3	13.1	 16
436	  2	52.3	8.0	 16
437	  2	56.0	11.3	 16
438	  2	66.8	11.9	 16
439	  2	110.0	19.1	 16
440	  2	58.3	10.1	 16
441	  2	132.5	15.9	 16
442	  2	87.8	15.3	 16
443	  2	68.0	10.6	 16
444	  2	69.3	13.7	 16
445	  2	66.3	11.4	 16
446	  2	82.8	17.0	 16
447	  2	55.5	8.4	 16
448	  2	53.5	8.6	 16
449	  2	67.5	12.4	 16
450	  2	63.0	9.8	 16
451	  2	137.3	16.6	 16
452	  2	309.8	35.0	 16
453	  2	319.0	38.4	 16
454	  2	190.8	24.2	 16
455	  2	83.0	15.6	 16
456	  2	556.8	51.9	 16
457	  2	851.3	54.3	 16
458	  2	126.0	21.3	 16
459	  2	70.5	11.4	 16
460	  2	265.3	23.6	 16
461	  2	162.3	28.9	 16
462	  2	50.3	7.4	 16
463	  2	56.3	7.3	 16
464	  2	197.5	30.7	 16
465	  2	482.0	45.9	 16
466	  2	152.8	19.5	 16
467	  2	306.8	25.3	 16
468	  2	137.5	22.9	 16
469	  2	74.3	11.4	 16
470	  2	216.0	17.8	 16
471	  2	63.5	9.9	 16
472	  2	46.8	7.0	 16
473	  2	355.0	37.9	 16
474	  2	50.3	8.4	 16
475	  2	59.3	12.0	 16
476	  2	42.3	5.6	 16
477	  2	141.8	22.3	 16
478	  2	90.8	15.7	 16
479	  2	87.5	14.3	 16
480	  2	61.3	8.5	 16
481	  2	60.3	10.6	 16
482	  2	195.3	33.5	 16
483	  2	80.0	12.1	 16
484	  2	99.3	16.3	 16
485	  2	131.8	15.2	 16
486	  2	53.3	8.8	 16
487	  2	65.8	13.4	 16
488	  2	52.0	8.3	 16
489	  2	59.8	12.5	 16
490	  2	124.3	23.7	 16
491	  2	65.8	8.6	 16
492	  2	64.5	12.1	 16
493	  2	195.5	19.1	 16
494	  2	79.5	10.3	 16
495	  2	63.3	13.0	 16
496	  2	113.0	17.3	 16
497	  2	323.0	31.2	 16
498	  2	53.8	7.6	 16
499	  2	62.3	10.1	 16
500	  2	62.3	14.5	 16
501	  2	125.3	18.6	 16
502	  2	177.3	22.6	 16
503	  2	76.5	17.6	 16
504	  2	58.3	12.5	 16
505	  2	56.5	9.5	 16
506	  2	219.0	18.5	 16
507	  2	139.0	15.1	 16
508	  2	89.8	13.9	 16
509	  2	180.8	34.5	 16
510	  2	169.3	23.9	 16
511	  2	174.3	25.0	 16
512	  2	64.8	14.9	 16
513	  2	489.3	56.7	 16
514	  2	106.5	19.9	 16
515	  2	94.3	15.1	 16
516	  2	74.8	11.7	 16
517	  2	100.0	12.9	 16
518	  2	274.0	26.9	 16
519	  2	361.5	32.4	 16
520	  2	74.3	15.0	 16
521	  2	54.5	9.6	 16
522	  2	344.5	43.5	 16
523	  2	80.0	14.1	 16
524	  2	1184.0	120.7	 16
525	  2	262.3	17.2	 16
526	  2	238.0	22.7	 16
527	  2	99.0	15.1	 16
528	  2	93.3	14.7	 16
529	  2	159.8	22.5	 16
530	  2	259.5	40.7	 16
531	  2	70.3	10.0	 16
532	  2	52.0	11.0	 16
533	  2	123.3	22.0	 16
534	  2	124.8	25.9	 16
535	  2	81.5	15.0	 16
536	  2	61.0	11.4	 16
537	  2	71.0	12.4	 16
538	  2	68.5	16.3	 16
539	  2	73.0	13.7	 16
540	  2	97.3	19.5	 16
541	  2	74.3	14.7	 20
542	  2	237.5	42.2	 16
543	  2	372.3	24.0	 16
544	  2	206.0	26.9	 16
545	  2	217.8	36.9	 16
546	  2	110.3	18.9	 16
547	  2	168.0	19.4	 16
548	  2	58.3	14.1	 16
549	  2	50.3	9.1	 16
550	  2	96.0	17.7	 16
551	  2	88.3	14.6	 16
552	  2	61.0	9.6	 16
553	  2	103.3	13.1	 16
554	  2	69.3	13.2	 16
555	  2	55.0	8.7	 16
556	  2	76.0	14.0	 16
557	  2	164.3	17.1	 16
558	  2	130.3	13.5	 16
559	  2	290.3	40.6	 16
560	  2	4278.5	225.4	 16
561	  2	131.0	15.6	 16
562	  2	348.5	46.3	 16
563	  2	85.0	11.8	 16
564	  2	115.5	13.2	 16
565	  2	109.0	23.3	 16
566	  2	135.3	27.2	 16
567	  2	62.0	10.9	 16
568	  2	166.5	32.6	 16
569	  2	113.3	15.3	 16
570	  2	57.0	9.5	 16
571	  2	57.5	9.5	 16
572	  2	57.5	10.3	 16
573	  2	114.3	10.4	 16
574	  2	61.3	10.4	 16
575	  2	51.0	9.2	 16
576	  2	63.5	13.5	 16
577	  2	60.3	15.8	 16
578	  2	113.0	15.3	 16
579	  2	131.8	22.8	 16
580	  2	193.3	25.0	 16
581	  2	90.0	16.4	 16
582	  2	161.0	25.6	 16
583	  2	352.0	37.1	 16
584	  2	116.0	26.7	 16
585	  2	216.3	30.2	 16
586	  2	107.0	14.1	 16
587	  2	97.0	21.4	 16
588	  2	81.8	18.3	 16
589	  2	155.3	22.3	 16
590	  2	175.5	29.3	 16
591	  2	57.3	11.4	 16
592	  2	129.0	32.1	 16
593	  2	70.3	12.2	 16
594	  2	58.8	13.2	 16
595	  2	58.8	12.7	 16
596	  2	153.5	22.2	 16
597	  2	221.5	29.4	 16
598	  2	204.3	35.2	 16
599	  2	193.5	22.1	 16
600	  2	180.3	26.5	 16
601	  2	180.8	31.0	 16
602	  2	112.0	18.3	 16
603	  2	108.3	15.7	 16
604	  2	141.5	17.9	 16
605	  2	56.3	8.0	 16
606	  2	62.8	11.9	 16
607	  2	70.3	12.7	 16
608	  2	141.5	18.8	 16
609	  2	1629.8	283.2	 16
610	  2	156.5	30.8	 16
611	  2	69.3	11.4	 16
612	  2	121.0	16.6	 16
613	  2	57.5	8.5	 16
614	  2	80.8	15.3	 16
615	  2	63.5	9.2	 16
616	  2	83.5	13.7	 16
617	  2	95.3	26.6	 16
618	  2	73.0	11.4	 16
619	  2	56.0	8.6	 16
620	  2	94.3	11.4	 16
621	  2	72.0	12.9	 16
622	  2	110.5	14.5	 16
623	  2	108.5	18.0	 16
624	  2	100.3	20.1	 16
625	  2	110.5	14.5	 16
626	  2	207.5	23.1	 16
627	  2	123.5	21.3	 16
628	  2	926.5	85.9	 16
629	  2	98.8	19.3	 16
630	  2	99.8	17.8	 16
631	  2	112.5	20.8	 16
632	  2	197.5	35.7	 16
633	  2	246.0	29.0	 16
634	  2	73.3	13.4	 16
635	  2	62.5	14.5	 16
636	  2	92.5	15.8	 16
637	  2	199.0	27.3	 16
638	  2	77.5	10.3	 16
639	  2	76.0	12.2	 16
640	  2	128.5	21.7	 16
641	  2	135.8	18.3	 16
642	  2	72.8	14.0	 16
643	  2	192.3	32.5	 16
644	  2	386.0	35.2	 16
645	  2	56.8	13.3	 16
646	  2	70.3	12.0	 16
647	  2	127.8	29.9	 16
648	  2	61.8	8.4	 16
649	  2	82.5	56.0	 16
650	  2	91.0	17.0	 16
651	  2	43.3	6.4	 16
652	  2	79.3	12.7	 16
653	  2	73.3	10.7	 16
654	  2	71.0	16.3	 16
655	  2	127.8	20.7	 16
656	  2	63.3	12.2	 16
657	  2	238.3	50.8	 16
658	  2	54.5	7.4	 16
659	  2	123.3	22.6	 20
660	  2	66.0	14.7	 16
661	  2	64.3	11.9	 16
662	  2	48.5	5.9	 16
663	  2	115.0	23.4	 16
664	  2	100.8	19.0	 16
665	  2	56.3	10.1	 16
666	  2	56.3	9.3	 16
667	  2	622.3	54.8	 16
668	  2	86.3	15.3	 16
669	  2	91.0	10.9	 16
670	  2	82.3	11.3	 16
671	  2	92.0	16.7	 16
672	  2	135.0	23.2	 16
673	  2	119.0	15.7	 16
674	  2	311.3	45.3	 16
675	  2	138.0	21.8	 16
676	  2	222.3	22.3	 16
677	  2	130.0	17.6	 16
678	  2	107.8	16.7	 16
679	  2	184.3	21.4	 16
680	  2	869.8	84.2	 16
681	  2	55.5	11.7	 16
682	  2	93.0	11.8	 16
683	  2	124.5	22.0	 16
684	  2	520.3	40.4	 16
685	  2	79.5	16.2	 16
686	  2	317.0	33.1	 16
687	  2	167.5	23.4	 16
688	  2	79.3	14.9	 16
689	  2	69.0	13.0	 16
690	  2	58.0	8.9	 16
691	  2	425.3	57.2	 16
692	  2	734.3	80.9	 16
693	  2	62.3	12.0	 16
694	  2	57.5	6.2	 16
695	  2	73.8	14.0	 16
696	  2	56.0	9.9	 16
697	  2	61.5	7.7	 16
698	  2	67.8	14.6	 16
699	  2	62.3	8.7	 16
700	  2	56.8	11.9	 16
701	  2	57.8	10.5	 16
702	  2	264.0	39.6	 16
703	  2	175.3	23.5	 16
704	  2	200.5	22.9	 16
705	  2	160.3	30.7	 16
706	  2	64.5	11.1	 16
707	  2	59.0	5.9	 16
708	  2	118.5	22.5	 16
709	  2	7501.0	633.1	 16
710	  2	109.3	16.4	 16
711	  2	7697.0	699.9	 16
  0	  3	8225.8	621.9	 16
  1	  3	121.3	20.2	 16
  2	  3	7915.8	740.9	 16
  3	  3	95.5	20.3	 16
  4	  3	58.3	11.5	 16
  5	  3	135.5	25.7	 16
  6	  3	69.3	10.1	 16
  7	  3	230.8	22.5	 16
  8	  3	75.8	12.5	 16
  9	  3	439.0	71.4	 16
 10	  3	389.3	77.3	 16
 11	  3	691.5	105.7	 16
 12	  3	300.3	30.6	 16
 13	  3	495.3	47.6	 16
 14	  3	623.0	42.3	 16
 15	  3	517.5	64.9	 16
 16	  3	543.8	35.1	 16
 17	  3	764.0	76.2	 16
 18	  3	740.3	65.7	 16
 19	  3	177.0	27.4	 16
 20	  3	101.5	14.8	 16
 21	  3	70.0	12.9	 16
 22	  3	144.3	19.9	 16
 23	  3	4035.5	341.8	 16
 24	  3	101.0	18.7	 16
 25	  3	156.3	19.7	 16
 26	  3	136.3	19.5	 16
 27	  3	119.0	19.8	 16
 28	  3	116.5	18.1	 16
 29	  3	110.3	16.7	 16
 30	  3	116.8	19.8	 16
 31	  3	126.3	15.6	 16
 32	  3	88.3	13.4	 16
 33	  3	429.8	79.9	 16
 34	  3	191.0	24.6	 16
 35	  3	127.8	21.6	 16
 36	  3	249.0	35.0	 16
 37	  3	1513.5	281.4	 16
 38	  3	142.0	15.0	 16
 39	  3	75.0	14.8	 16
 40	  3	166.0	24.0	 16
 41	  3	1036.8	68.9	 16
 42	  3	1171.3	135.3	 16
 43	  3	110.0	17.9	 16
 44	  3	287.5	41.1	 16
 45	  3	116.3	19.2	 16
 46	  3	141.3	13.4	 16
 47	  3	681.3	50.6	 16
 48	  3	76.0	11.6	 16
 49	  3	81.0	9.4	 16
 50	  3	83.5	7.9	 16
 51	  3	208.0	22.7	 16
 52	  3	707.8	74.1	 16
 53	  3	187.8	20.6	 16
 54	  3	262.3	34.3	 16
 55	  3	286.3	39.5	 16
 56	  3	322.8	27.4	 16
 57	  3	450.5	68.9	 16
 58	  3	85.0	9.4	 16
 59	  3	272.3	49.3	 16
 60	  3	103.5	13.5	 16
 61	  3	158.8	21.5	 16
 62	  3	848.3	178.2	 16
 63	  3	126.0	16.9	 16
 64	  3	6276.0	1353.5	 16
 65	  3	154.0	18.8	 16
 66	  3	107.5	18.8	 16
 67	  3	196.0	19.5	 16
 68	  3	75.3	11.3	 16
 69	  3	87.0	16.9	 20
 70	  3	252.0	40.0	 16
 71	  3	190.8	36.3	 16
 72	  3	140.8	27.5	 16
 73	  3	880.5	124.0	 16
 74	  3	139.3	22.7	 16
 75	  3	85.5	19.1	 16
 76	  3	92.5	22.3	 16
 77	  3	96.3	13.2	 16
 78	  3	169.3	20.3	 16
 79	  3	247.3	46.9	 16
 80	  3	67.5	10.0	 16
 81	  3	83.0	15.9	 16
 82	  3	85.5	13.4	 16
 83	  3	614.8	71.1	 16
 84	  3	294.3	42.0	 16
 85	  3	123.0	18.2	 16
 86	  3	82.3	16.7	 16
 87	  3	95.0	15.1	 16
 88	  3	320.3	45.0	 16
 89	  3	214.5	42.4	 16
 90	  3	131.5	21.4	 16
 91	  3	564.8	98.5	 16
 92	  3	635.0	38.0	 16
 93	  3	625.8	49.9	 16
 94	  3	705.3	47.9	 16
 95	  3	662.8	66.3	 16
 96	  3	550.8	41.3	 16
 97	  3	359.0	33.1	 16
 98	  3	203.0	36.8	 16
 99	  3	68.0	12.7	 16
100	  3	127.5	22.8	 16
101	  3	191.5	14.5	 16
102	  3	76.0	13.2	 16
103	  3	619.3	63.6	 16
104	  3	131.3	14.3	 16
105	  3	79.5	11.5	 16
106	  3	122.3	23.1	 16
107	  3	282.3	24.1	 16
108	  3	100.5	12.7	 16
109	  3	120.0	15.6	 16
110	  3	165.0	28.6	 16
111	  3	195.5	31.4	 16
112	  3	116.0	12.9	 16
113	  3	473.0	59.9	 16
114	  3	118.0	14.5	 16
115	  3	107.5	11.2	 16
116	  3	179.0	24.8	 16
117	  3	115.5	15.8	 16
118	  3	217.0	27.3	 16
119	  3	295.0	36.7	 16
120	  3	133.5	20.1	 16
121	  3	518.5	46.5	 16
122	  3	79.8	12.4	 16
123	  3	59.3	10.4	 16
124	  3	62.5	9.5	 16
125	  3	88.3	15.6	 16
126	  3	117.8	16.3	 16
127	  3	75.3	11.5	 16
128	  3	75.0	13.1	 16
129	  3	71.8	13.7	 16
130	  3	698.8	79.7	 16
131	  3	284.8	31.8	 16
132	  3	315.0	36.6	 16
133	  3	164.3	28.6	 16
134	  3	219.3	34.3	 16
135	  3	320.0	31.2	 16
136	  3	1977.3	163.6	 16
137	  3	84.5	13.6	 16
138	  3	424.8	47.6	 16
139	  3	958.5	90.5	 16
140	  3	122.3	19.8	 16
141	  3	118.8	17.5	 16
142	  3	1294.8	190.0	 16
143	  3	350.0	42.8	 16
144	  3	57.5	8.9	 16
145	  3	61.0	8.2	 16
146	  3	5458.0	277.3	 16
147	  3	785.3	56.5	 16
148	  3	190.5	26.7	 16
149	  3	179.0	21.1	 16
150	  3	87.5	15.7	 16
151	  3	403.3	35.7	 16
152	  3	376.8	34.1	 16
153	  3	153.5	18.1	 16
154	  3	60.5	9.9	 16
155	  3	1543.0	169.3	 16
156	  3	81.0	10.3	 16
157	  3	134.0	20.7	 16
158	  3	75.0	10.9	 16
159	  3	482.8	41.5	 16
160	  3	167.5	24.7	 16
161	  3	378.5	46.2	 16
162	  3	5459.3	595.4	 16
163	  3	501.5	73.6	 16
164	  3	215.0	21.0	 16
165	  3	221.3	25.5	 16
166	  3	112.5	16.6	 16
167	  3	171.0	16.5	 16
168	  3	1404.8	242.8	 16
169	  3	75.5	12.4	 16
170	  3	88.0	18.0	 16
171	  3	58.3	8.8	 16
172	  3	224.8	31.0	 16
173	  3	56.0	10.0	 16
174	  3	157.3	35.2	 16
175	  3	63.0	10.9	 16
176	  3	3047.5	440.8	 16
177	  3	54.5	12.8	 16
178	  3	63.8	10.7	 16
179	  3	165.3	29.8	 16
180	  3	176.8	22.8	 16
181	  3	67.3	13.6	 16
182	  3	85.8	17.1	 16
183	  3	87.3	10.4	 16
184	  3	176.0	32.0	 16
185	  3	160.8	29.9	 16
186	  3	59.0	10.8	 16
187	  3	59.0	11.9	 20
188	  3	76.3	14.4	 16
189	  3	149.8	26.5	 16
190	  3	117.3	9.8	 16
191	  3	184.8	31.7	 16
192	  3	852.8	197.1	 16
193	  3	170.8	29.7	 16
194	  3	220.5	23.3	 16
195	  3	732.0	158.6	 16
196	  3	141.0	20.6	 16
197	  3	98.3	14.3	 16
198	  3	120.0	17.7	 16
199	  3	140.3	18.4	 16
200	  3	123.8	17.1	 16
201	  3	848.3	99.6	 16
202	  3	2559.8	279.6	 16
203	  3	82.5	16.3	 16
204	  3	118.3	15.9	 16
205	  3	59.8	9.0	 16
206	  3	66.0	11.3	 16
207	  3	450.3	59.3	 16
208	  3	55.0	8.5	 16
209	  3	71.5	13.4	 16
210	  3	66.0	14.1	 16
211	  3	56.3	7.8	 16
212	  3	73.5	12.6	 16
213	  3	72.8	15.2	 16
214	  3	58.3	8.2	 16
215	  3	522.3	71.2	 16
216	  3	60.5	11.5	 16
217	  3	187.8	28.9	 16
218	  3	94.5	18.9	 16
219	  3	126.5	24.7	 16
220	  3	154.3	19.8	 16
221	  3	228.0	32.9	 16
222	  3	64.5	10.9	 16
223	  3	268.8	50.2	 16
224	  3	61.5	11.6	 16
225	  3	85.3	9.1	 16
226	  3	267.3	33.7	 16
227	  3	75.0	11.3	 16
228	  3	76.3	14.2	 16
229	  3	94.0	10.4	 16
230	  3	1428.5	189.1	 16
231	  3	488.8	62.1	 16
232	  3	80.0	14.8	 16
233	  3	141.3	24.9	 16
234	  3	58.3	7.2	 16
235	  3	42.3	9.1	 16
236	  3	48.5	10.4	 16
237	  3	37.5	7.8	 16
238	  3	44.8	7.8	 16
239	  3	37.5	8.5	 16
240	  3	130.3	18.0	 16
241	  3	210.0	31.9	 16
242	  3	72.3	10.7	 16
243	  3	306.0	34.6	 16
244	  3	82.8	15.1	 16
245	  3	77.8	10.4	 16
246	  3	127.0	21.5	 16
247	  3	79.0	13.3	 16
248	  3	55.0	7.4	 16
249	  3	68.0	11.8	 16
250	  3	169.3	30.5	 16
251	  3	73.5	13.9	 16
252	  3	244.0	29.8	 16
253	  3	92.3	16.6	 16
254	  3	80.3	16.1	 16
255	  3	583.0	67.1	 16
256	  3	131.3	19.6	 16
257	  3	115.3	13.4	 16
258	  3	753.8	63.7	 16
259	  3	345.5	39.3	 16
260	  3	79.3	12.1	 16
261	  3	54.5	10.2	 16
262	  3	57.0	8.2	 16
263	  3	185.3	25.6	 16
264	  3	435.5	34.6	 16
265	  3	340.5	51.2	 16
266	  3	232.8	30.5	 16
267	  3	183.5	31.9	 16
268	  3	63.0	10.3	 16
269	  3	403.5	58.6	 16
270	  3	663.5	104.2	 16
271	  3	153.0	26.6	 16
272	  3	83.3	15.2	 16
273	  3	494.8	68.0	 16
274	  3	1234.0	237.2	 16
275	  3	206.8	27.3	 16
276	  3	150.3	20.5	 16
277	  3	195.0	18.7	 16
278	  3	135.0	20.5	 16
279	  3	167.8	12.4	 16
280	  3	141.0	17.9	 16
281	  3	74.8	15.2	 16
282	  3	408.3	61.4	 16
283	  3	144.0	22.0	 16
284	  3	131.8	17.1	 16
285	  3	190.5	32.0	 16
286	  3	104.5	12.3	 16
287	  3	99.5	17.8	 16
288	  3	145.0	23.2	 16
289	  3	82.3	14.8	 16
290	  3	89.3	14.1	 16
291	  3	59.0	12.3	 16
292	  3	285.5	29.0	 16
293	  3	1546.0	200.0	 16
294	  3	206.3	41.0	 16
295	  3	87.3	12.9	 16
296	  3	353.8	64.5	 16
297	  3	2956.0	537.2	 16
298	  3	723.5	104.5	 16
299	  3	881.3	145.8	 16
300	  3	341.8	66.0	 16
301	  3	74.3	10.1	 16
302	  3	142.8	24.4	 16
303	  3	63.0	11.9	 16
304	  3	132.3	22.6	 16
305	  3	54.5	9.9	 16
306	  3	74.0	12.1	 20
307	  3	117.5	15.7	 16
308	  3	82.3	10.9	 16
309	  3	3276.3	247.6	 16
310	  3	3746.5	569.2	 16
311	  3	154.3	25.7	 16
312	  3	252.8	31.4	 16
313	  3	252.0	38.9	 16
314	  3	125.3	15.0	 16
315	  3	368.5	64.4	 16
316	  3	1796.3	296.6	 16
317	  3	524.8	83.0	 16
318	  3	251.8	57.1	 16
319	  3	80.0	16.9	 16
320	  3	259.3	47.3	 16
321	  3	207.5	35.4	 16
322	  3	117.3	18.7	 16
323	  3	267.8	42.1	 16
324	  3	148.5	16.6	 16
325	  3	115.0	15.7	 16
326	  3	1305.0	309.2	 16
327	  3	61.3	9.2	 16
328	  3	118.5	18.1	 16
329	  3	1037.3	182.7	 16
330	  3	74.0	13.4	 16
331	  3	74.3	13.1	 16
332	  3	58.3	11.4	 16
333	  3	100.5	14.2	 16
334	  3	90.3	12.2	 16
335	  3	55.8	13.7	 16
336	  3	65.5	8.9	 16
337	  3	62.0	11.5	 16
338	  3	70.3	13.9	 16
339	  3	113.3	19.8	 16
340	  3	72.5	11.9	 16
341	  3	2554.5	274.7	 16
342	  3	101.0	21.2	 16
343	  3	110.5	16.6	 16
344	  3	143.3	20.3	 16
345	  3	185.0	30.3	 16
346	  3	139.0	20.6	 16
347	  3	86.3	15.0	 16
348	  3	1447.3	161.0	 16
349	  3	337.0	36.2	 16
350	  3	61.0	8.1	 16
351	  3	77.0	10.5	 16
352	  3	71.5	15.9	 16
353	  3	65.5	9.7	 16
354	  3	179.3	22.8	 16
355	  3	87.8	16.4	 16
356	  3	74.0	11.0	 16
357	  3	153.3	12.0	 16
358	  3	58.0	14.8	 16
359	  3	155.0	21.8	 16
360	  3	77.5	14.1	 16
361	  3	1953.8	199.0	 16
362	  3	2369.3	184.0	 16
363	  3	2654.8	239.1	 16
364	  3	161.8	26.3	 16
365	  3	196.3	25.8	 16
366	  3	77.3	15.0	 16
367	  3	61.8	10.5	 16
368	  3	132.8	22.2	 16
369	  3	78.5	15.9	 16
370	  3	88.3	12.6	 16
371	  3	663.3	122.5	 16
372	  3	92.3	16.1	 16
373	  3	1332.8	184.5	 16
374	  3	86.5	12.0	 16
375	  3	71.8	13.6	 16
376	  3	223.5	37.3	 16
377	  3	65.3	8.3	 16
378	  3	111.0	17.5	 16
379	  3	105.3	15.1	 16
380	  3	105.3	13.3	 16
381	  3	1303.8	196.1	 16
382	  3	443.3	34.1	 16
383	  3	566.0	41.7	 16
384	  3	76.0	14.6	 16
385	  3	61.0	12.6	 16
386	  3	53.0	9.2	 16
387	  3	189.8	26.4	 16
388	  3	84.5	19.1	 16
389	  3	240.8	30.1	 16
390	  3	189.3	23.7	 16
391	  3	67.3	8.1	 16
392	  3	295.5	23.9	 16
393	  3	85.3	14.6	 16
394	  3	425.3	54.1	 16
395	  3	94.8	16.6	 16
396	  3	1041.0	123.7	 16
397	  3	69.3	11.2	 16
398	  3	68.8	11.0	 16
399	  3	68.0	11.3	 16
400	  3	1243.5	194.7	 16
401	  3	495.5	61.7	 16
402	  3	492.5	96.5	 16
403	  3	85.3	15.8	 16
404	  3	65.3	11.6	 16
405	  3	174.8	30.7	 16
406	  3	107.8	13.9	 16
407	  3	106.0	21.7	 16
408	  3	89.5	13.9	 16
409	  3	93.3	19.8	 16
410	  3	120.8	21.6	 16
411	  3	453.8	47.7	 16
412	  3	196.3	20.4	 16
413	  3	1420.0	122.1	 16
414	  3	80.0	12.8	 16
415	  3	79.0	11.2	 16
416	  3	122.5	27.3	 16
417	  3	137.0	20.9	 16
418	  3	132.5	15.4	 16
419	  3	94.0	15.2	 16
420	  3	65.5	12.1	 16
421	  3	777.3	125.8	 16
422	  3	822.8	130.9	 16
423	  3	102.5	16.6	 16
424	  3	81.3	14.2	 16
425	  3	1823.3	407.3	 20
426	  3	52.3	9.3	 16
427	  3	82.5	16.3	 16
428	  3	67.3	13.3	 16
429	  3	1102.0	245.9	 16
430	  3	219.0	41.7	 16
431	  3	65.3	13.0	 16
432	  3	168.8	34.6	 16
433	  3	1849.8	385.6	 16
434	  3	211.3	45.8	 16
435	  3	219.3	37.2	 16
436	  3	71.3	16.7	 16
437	  3	54.3	9.0	 16
438	  3	68.8	14.2	 16
439	  3	141.0	17.1	 16
440	  3	71.0	12.1	 16
441	  3	301.8	36.4	 16
442	  3	1095.5	159.3	 16
443	  3	546.0	56.8	 16
444	  3	140.8	21.3	 16
445	  3	115.0	20.8	 16
446	  3	64.5	10.6	 16
447	  3	57.5	12.8	 16
448	  3	324.5	49.2	 16
449	  3	80.3	11.6	 16
450	  3	777.5	128.5	 16
451	  3	63.0	10.7	 16
452	  3	667.0	113.2	 16
453	  3	514.8	45.2	 16
454	  3	902.8	105.3	 16
455	  3	379.0	51.9	 16
456	  3	654.3	84.6	 16
457	  3	171.0	24.4	 16
458	  3	99.8	35.6	 16
459	  3	278.0	48.0	 16
460	  3	430.0	120.5	 16
461	  3	693.5	55.8	 16
462	  3	95.5	15.7	 16
463	  3	57.5	9.4	 16
464	  3	1113.0	62.2	 16
465	  3	3976.3	110.9	 16
466	  3	4237.3	121.8	 16
467	  3	4374.3	293.0	 16
468	  3	142.3	20.5	 16
469	  3	185.3	24.9	 16
470	  3	568.3	65.6	 16
471	  3	63.3	11.0	 16
472	  3	57.0	10.2	 16
473	  3	41.3	11.9	 16
474	  3	43.0	9.1	 16
475	  3	42.5	9.3	 16
476	  3	47.0	7.8	 16
477	  3	235.3	26.3	 16
478	  3	171.3	27.1	 16
479	  3	99.0	17.7	 16
480	  3	105.8	18.3	 16
481	  3	66.8	17.9	 16
482	  3	103.5	16.4	 16
483	  3	392.8	77.6	 16
484	  3	114.0	17.5	 16
485	  3	254.0	49.2	 16
486	  3	108.3	19.3	 16
487	  3	95.0	19.1	 16
488	  3	133.5	21.9	 16
489	  3	59.8	10.1	 16
490	  3	74.5	17.7	 16
491	  3	410.5	43.5	 16
492	  3	94.0	11.7	 16
493	  3	104.5	17.2	 16
494	  3	66.3	10.3	 16
495	  3	1118.5	100.2	 16
496	  3	500.8	49.6	 16
497	  3	317.5	37.6	 16
498	  3	97.3	17.7	 16
499	  3	81.3	16.7	 16
500	  3	231.3	35.8	 16
501	  3	133.8	18.8	 16
502	  3	675.8	73.8	 16
503	  3	58.0	10.6	 16
504	  3	55.5	7.9	 16
505	  3	6030.3	679.6	 16
506	  3	295.5	44.3	 16
507	  3	163.0	17.0	 16
508	  3	132.5	19.8	 16
509	  3	159.0	19.2	 16
510	  3	262.8	31.3	 16
511	  3	120.3	21.0	 16
512	  3	1171.3	214.8	 16
513	  3	65.3	10.4	 16
514	  3	54.0	12.8	 16
515	  3	61.5	8.6	 16
516	  3	534.8	54.2	 16
517	  3	466.3	53.1	 16
518	  3	129.5	24.4	 16
519	  3	352.3	46.6	 16
520	  3	115.0	18.1	 16
521	  3	139.5	20.9	 16
522	  3	373.0	46.3	 16
523	  3	353.0	49.2	 16
524	  3	614.3	70.1	 16
525	  3	65.8	13.0	 16
526	  3	81.8	10.7	 16
527	  3	180.0	33.6	 16
528	  3	66.0	12.4	 16
529	  3	288.0	53.5	 16
530	  3	69.0	12.9	 16
531	  3	86.5	13.7	 16
532	  3	139.0	23.2	 16
533	  3	93.0	15.4	 16
534	  3	391.3	60.0	 16
535	  3	193.5	19.1	 16
536	  3	205.5	28.7	 16
537	  3	104.3	23.0	 16
538	  3	114.5	25.5	 16
539	  3	568.3	116.7	 16
540	  3	60.0	11.7	 16
541	  3	294.5	47.1	 16
542	  3	348.8	38.7	 16
543	  3	192.5	25.0	 20
544	  3	522.5	63.0	 16
545	  3	462.3	70.1	 16
546	  3	325.3	53.6	 16
547	  3	206.5	21.9	 16
548	  3	576.0	70.6	 16
549	  3	132.5	19.9	 16
550	  3	60.8	10.7	 16
551	  3	163.8	26.0	 16
552	  3	1263.0	210.0	 16
553	  3	78.3	18.5	 16
554	  3	3160.5	419.4	 16
555	  3	59.5	9.2	 16
556	  3	263.5	52.0	 16
557	  3	202.8	34.6	 16
558	  3	952.3	146.8	 16
559	  3	197.3	23.6	 16
560	  3	2343.8	302.7	 16
561	  3	804.3	93.4	 16
562	  3	292.5	43.4	 16
563	  3	210.5	32.9	 16
564	  3	556.5	81.0	 16
565	  3	185.0	31.5	 16
566	  3	1247.0	266.2	 16
567	  3	52.3	8.1	 16
568	  3	121.3	19.3	 16
569	  3	290.0	38.4	 16
570	  3	62.5	11.7	 16
571	  3	64.5	12.0	 16
572	  3	1525.0	167.6	 16
573	  3	143.0	19.3	 16
574	  3	105.5	16.1	 16
575	  3	266.8	35.1	 16
576	  3	261.5	30.0	 16
577	  3	658.5	76.2	 16
578	  3	65.3	11.4	 16
579	  3	96.0	14.5	 16
580	  3	104.3	17.6	 16
581	  3	158.8	24.6	 16
582	  3	81.8	16.2	 16
583	  3	190.3	20.7	 16
584	  3	180.0	16.8	 16
585	  3	144.8	30.0	 16
586	  3	145.0	15.0	 16
587	  3	144.0	17.7	 16
588	  3	102.8	19.5	 16
589	  3	142.5	13.9	 16
590	  3	209.0	21.4	 16
591	  3	88.3	17.3	 16
592	  3	282.8	45.5	 16
593	  3	668.0	84.2	 16
594	  3	79.5	11.6	 16
595	  3	248.8	37.8	 16
596	  3	259.0	32.3	 16
597	  3	272.5	38.2	 16
598	  3	123.8	22.7	 16
599	  3	151.5	14.8	 16
600	  3	269.5	25.6	 16
601	  3	232.0	25.4	 16
602	  3	411.8	47.4	 16
603	  3	630.0	61.4	 16
604	  3	202.3	16.9	 16
605	  3	1174.3	176.5	 16
606	  3	112.0	22.3	 16
607	  3	320.5	49.2	 16
608	  3	311.0	45.1	 16
609	  3	258.0	35.9	 16
610	  3	505.8	52.8	 16
611	  3	266.0	33.2	 16
612	  3	186.3	34.8	 16
613	  3	55.8	9.8	 16
614	  3	352.0	71.6	 16
615	  3	56.8	16.5	 16
616	  3	126.3	20.3	 16
617	  3	162.8	17.2	 16
618	  3	117.3	18.8	 16
619	  3	84.0	18.3	 16
620	  3	2486.8	296.8	 16
621	  3	188.5	39.2	 16
622	  3	50.3	12.7	 16
623	  3	73.5	11.8	 16
624	  3	52.5	11.6	 16
625	  3	93.3	20.1	 16
626	  3	208.5	28.1	 16
627	  3	2107.0	394.3	 16
628	  3	519.0	82.0	 16
629	  3	407.5	47.7	 16
630	  3	195.3	27.1	 16
631	  3	1301.0	250.1	 16
632	  3	63.0	11.7	 16
633	  3	148.3	19.0	 16
634	  3	219.8	51.5	 16
635	  3	188.0	27.6	 16
636	  3	247.8	45.6	 16
637	  3	1109.8	227.4	 16
638	  3	67.5	12.5	 16
639	  3	448.3	85.3	 16
640	  3	815.5	176.9	 16
641	  3	72.8	13.3	 16
642	  3	60.5	9.2	 16
643	  3	79.8	11.1	 16
644	  3	251.5	51.0	 16
645	  3	547.0	101.4	 16
646	  3	3079.0	592.3	 16
647	  3	47.5	9.9	 16
648	  3	202.3	43.7	 16
649	  3	76.5	15.3	 16
650	  3	50.3	12.2	 16
651	  3	81.3	12.2	 16
652	  3	61.5	13.5	 16
653	  3	89.8	18.1	 16
654	  3	47.0	10.9	 16
655	  3	97.8	18.2	 16
656	  3	133.3	26.8	 16
657	  3	64.5	9.6	 16
658	  3	50.5	8.5	 16
659	  3	63.5	19.7	 16
660	  3	192.8	35.2	 16
661	  3	580.8	116.9	 16
662	  3	175.3	22.0	 20
663	  3	490.5	43.1	 16
664	  3	65.3	10.6	 16
665	  3	195.5	21.8	 16
666	  3	965.0	128.6	 16
667	  3	80.5	11.4	 16
668	  3	152.8	23.6	 16
669	  3	136.3	18.0	 16
670	  3	78.5	11.6	 16
671	  3	1134.8	203.0	 16
672	  3	118.8	16.9	 16
673	  3	1187.0	81.6	 16
674	  3	191.0	22.6	 16
675	  3	153.0	29.5	 16
676	  3	210.8	26.1	 16
677	  3	211.0	35.8	 16
678	  3	61.5	12.3	 16
679	  3	70.3	11.3	 16
680	  3	105.5	18.5	 16
681	  3	62.3	10.0	 16
682	  3	318.8	25.8	 16
683	  3	114.3	15.0	 16
684	  3	75.5	13.3	 16
685	  3	127.3	16.4	 16
686	  3	227.3	23.9	 16
687	  3	86.3	13.7	 16
688	  3	88.3	10.6	 16
689	  3	323.5	50.1	 16
690	  3	2187.8	296.5	 16
691	  3	238.5	27.5	 16
692	  3	462.0	49.9	 16
693	  3	116.5	21.3	 16
694	  3	161.0	27.0	 16
695	  3	251.0	35.6	 16
696	  3	637.8	75.5	 16
697	  3	111.0	16.8	 16
698	  3	191.0	31.7	 16
699	  3	277.5	41.0	 16
700	  3	1949.8	168.9	 16
701	  3	779.5	45.1	 16
702	  3	206.3	25.4	 16
703	  3	354.5	39.7	 16
704	  3	241.5	24.9	 16
705	  3	717.5	66.2	 16
706	  3	95.3	13.0	 16
707	  3	62.8	28.9	 16
708	  3	7005.3	533.5	 16
709	  3	91.5	15.8	 16
710	  3	7724.5	604.9	 16
711	  3	92.5	18.9	 16
  0	  4	55.3	12.2	 16
  1	  4	53.8	10.2	 16
  2	  4	57.3	17.0	 16
  3	  4	52.3	9.4	 16
  4	  4	52.5	11.4	 16
  5	  4	122.3	17.0	 16
  6	  4	67.3	13.9	 16
  7	  4	213.0	22.6	 16
  8	  4	69.8	10.7	 16
  9	  4	94.3	18.8	 16
 10	  4	87.8	14.3	 16
 11	  4	202.8	24.2	 16
 12	  4	195.3	32.8	 16
 13	  4	467.8	103.8	 16
 14	  4	518.5	45.3	 16
 15	  4	415.3	48.0	 16
 16	  4	245.5	28.6	 16
 17	  4	1847.3	149.6	 16
 18	  4	825.3	76.7	 16
 19	  4	610.8	49.2	 16
 20	  4	86.3	13.3	 16
 21	  4	70.3	11.1	 16
 22	  4	185.5	19.3	 16
 23	  4	433.5	35.1	 16
 24	  4	86.3	16.7	 16
 25	  4	145.0	27.6	 16
 26	  4	122.5	19.7	 16
 27	  4	116.5	23.0	 16
 28	  4	127.3	19.3	 16
 29	  4	126.0	20.1	 16
 30	  4	117.3	14.0	 16
 31	  4	138.5	22.5	 16
 32	  4	96.3	9.4	 16
 33	  4	149.3	21.6	 16
 34	  4	134.0	23.8	 16
 35	  4	290.5	31.4	 16
 36	  4	165.0	26.8	 16
 37	  4	200.5	40.0	 16
 38	  4	134.3	14.2	 16
 39	  4	93.5	26.1	 16
 40	  4	118.8	13.9	 16
 41	  4	169.3	17.3	 16
 42	  4	193.8	27.4	 16
 43	  4	127.0	19.0	 16
 44	  4	169.3	26.3	 16
 45	  4	120.3	17.5	 16
 46	  4	164.0	16.3	 16
 47	  4	247.0	33.0	 16
 48	  4	72.0	12.7	 16
 49	  4	74.5	11.7	 16
 50	  4	150.8	18.6	 16
 51	  4	143.8	17.2	 16
 52	  4	215.8	28.5	 16
 53	  4	184.5	31.9	 16
 54	  4	275.8	34.9	 16
 55	  4	318.0	35.8	 16
 56	  4	270.8	38.3	 16
 57	  4	187.8	27.5	 16
 58	  4	92.0	16.8	 16
 59	  4	132.8	19.6	 16
 60	  4	77.5	11.6	 16
 61	  4	151.3	19.4	 16
 62	  4	153.3	23.1	 16
 63	  4	326.8	35.6	 16
 64	  4	1944.5	120.7	 16
 65	  4	121.0	22.1	 16
 66	  4	98.3	12.4	 16
 67	  4	193.5	36.4	 16
 68	  4	94.3	13.8	 16
 69	  4	83.5	11.5	 16
 70	  4	187.3	16.2	 16
 71	  4	124.3	18.6	 16
 72	  4	123.8	24.3	 20
 73	  4	329.5	49.9	 16
 74	  4	115.5	16.8	 16
 75	  4	92.5	18.1	 16
 76	  4	82.3	17.2	 16
 77	  4	101.8	16.9	 16
 78	  4	152.0	21.1	 16
 79	  4	88.3	13.3	 16
 80	  4	80.8	14.4	 16
 81	  4	90.5	15.5	 16
 82	  4	77.5	7.5	 16
 83	  4	340.0	45.6	 16
 84	  4	207.5	34.8	 16
 85	  4	82.5	19.3	 16
 86	  4	102.8	12.3	 16
 87	  4	237.8	23.0	 16
 88	  4	591.0	55.9	 16
 89	  4	291.8	35.2	 16
 90	  4	158.5	15.8	 16
 91	  4	230.5	22.5	 16
 92	  4	255.0	36.8	 16
 93	  4	265.0	30.5	 16
 94	  4	260.3	37.2	 16
 95	  4	264.3	31.6	 16
 96	  4	157.3	17.5	 16
 97	  4	281.3	31.1	 16
 98	  4	114.0	22.9	 16
 99	  4	93.5	15.0	 16
100	  4	188.3	22.6	 16
101	  4	301.5	31.2	 16
102	  4	76.0	14.6	 16
103	  4	146.5	19.2	 16
104	  4	142.3	18.6	 16
105	  4	126.3	15.6	 16
106	  4	114.0	24.4	 16
107	  4	249.5	44.0	 16
108	  4	99.0	17.3	 16
109	  4	130.3	12.7	 16
110	  4	74.5	12.4	 16
111	  4	87.5	16.1	 16
112	  4	149.3	15.5	 16
113	  4	123.5	18.4	 16
114	  4	123.3	20.5	 16
115	  4	83.8	17.5	 16
116	  4	86.3	23.5	 16
117	  4	98.3	18.3	 16
118	  4	91.8	14.5	 16
119	  4	194.0	36.4	 16
120	  4	205.3	28.2	 16
121	  4	206.5	24.8	 16
122	  4	76.8	11.7	 16
123	  4	58.5	10.1	 16
124	  4	62.8	14.2	 16
125	  4	73.5	13.4	 16
126	  4	104.5	17.8	 16
127	  4	72.5	14.8	 16
128	  4	77.3	11.2	 16
129	  4	61.5	8.9	 16
130	  4	116.3	22.9	 16
131	  4	667.0	75.3	 16
132	  4	307.5	35.6	 16
133	  4	87.3	10.9	 16
134	  4	205.0	29.3	 16
135	  4	151.8	32.4	 16
136	  4	609.8	59.3	 16
137	  4	72.8	12.5	 16
138	  4	133.0	23.1	 16
139	  4	376.0	39.3	 16
140	  4	74.3	14.8	 16
141	  4	64.8	13.7	 16
142	  4	370.0	40.0	 16
143	  4	223.5	36.3	 16
144	  4	56.0	8.0	 16
145	  4	65.3	12.9	 16
146	  4	1297.0	110.0	 16
147	  4	115.0	15.8	 16
148	  4	106.5	17.5	 16
149	  4	67.5	13.1	 16
150	  4	82.8	11.4	 16
151	  4	140.0	25.1	 16
152	  4	99.8	14.0	 16
153	  4	130.3	20.3	 16
154	  4	63.8	12.9	 16
155	  4	100.5	14.9	 16
156	  4	53.8	12.2	 16
157	  4	67.0	8.4	 16
158	  4	65.5	15.0	 16
159	  4	92.0	17.2	 16
160	  4	304.8	27.7	 16
161	  4	315.5	34.6	 16
162	  4	872.3	113.4	 16
163	  4	82.0	14.3	 16
164	  4	152.3	20.1	 16
165	  4	202.8	34.2	 16
166	  4	76.5	16.8	 16
167	  4	111.3	18.1	 16
168	  4	128.5	30.9	 16
169	  4	62.0	15.3	 16
170	  4	89.3	12.6	 16
171	  4	52.3	9.6	 16
172	  4	80.5	12.8	 16
173	  4	64.0	11.4	 16
174	  4	83.8	12.3	 16
175	  4	57.0	9.1	 16
176	  4	176.0	27.4	 16
177	  4	52.5	10.6	 16
178	  4	52.0	10.2	 16
179	  4	231.3	30.8	 16
180	  4	287.5	26.2	 16
181	  4	58.0	10.9	 16
182	  4	64.3	10.4	 16
183	  4	142.0	23.5	 16
184	  4	80.8	14.1	 16
185	  4	79.8	15.3	 16
186	  4	57.0	12.7	 16
187	  4	49.3	9.8	 16
188	  4	54.0	9.5	 16
189	  4	75.3	15.0	 16
190	  4	78.3	11.8	 20
191	  4	167.0	32.4	 16
192	  4	238.8	36.1	 16
193	  4	97.5	12.4	 16
194	  4	90.3	18.1	 16
195	  4	123.5	24.5	 16
196	  4	133.3	19.6	 16
197	  4	221.3	29.3	 16
198	  4	136.8	20.5	 16
199	  4	218.8	21.0	 16
200	  4	100.8	18.9	 16
201	  4	95.0	12.3	 16
202	  4	158.5	28.0	 16
203	  4	81.5	13.1	 16
204	  4	73.8	13.7	 16
205	  4	84.0	11.8	 16
206	  4	98.8	26.8	 16
207	  4	109.8	19.8	 16
208	  4	57.3	13.2	 16
209	  4	67.8	15.5	 16
210	  4	68.3	8.2	 16
211	  4	59.0	13.5	 16
212	  4	59.5	8.7	 16
213	  4	88.3	15.4	 16
214	  4	59.8	11.7	 16
215	  4	110.8	13.0	 16
216	  4	69.3	15.8	 16
217	  4	174.0	33.5	 16
218	  4	133.5	24.2	 16
219	  4	103.5	10.7	 16
220	  4	85.8	16.3	 16
221	  4	89.5	16.2	 16
222	  4	84.5	15.3	 16
223	  4	71.0	14.0	 16
224	  4	56.3	11.8	 16
225	  4	70.5	13.7	 16
226	  4	83.3	10.3	 16
227	  4	75.8	12.3	 16
228	  4	82.5	12.2	 16
229	  4	65.8	11.9	 16
230	  4	75.0	13.9	 16
231	  4	65.0	12.4	 16
232	  4	62.5	11.0	 16
233	  4	58.3	8.9	 16
234	  4	48.8	8.1	 16
235	  4	46.0	8.6	 16
236	  4	38.5	9.9	 16
237	  4	44.5	8.1	 16
238	  4	39.3	8.9	 16
239	  4	45.0	9.6	 16
240	  4	102.0	15.7	 16
241	  4	128.0	21.9	 16
242	  4	80.0	14.9	 16
243	  4	424.8	43.0	 16
244	  4	101.3	16.8	 16
245	  4	74.5	9.2	 16
246	  4	192.3	27.9	 16
247	  4	143.3	20.8	 16
248	  4	57.5	9.9	 16
249	  4	67.5	7.5	 16
250	  4	69.0	14.9	 16
251	  4	72.0	9.5	 16
252	  4	85.5	12.6	 16
253	  4	54.0	8.2	 16
254	  4	68.3	8.7	 16
255	  4	101.8	15.4	 16
256	  4	63.0	10.2	 16
257	  4	61.8	15.7	 16
258	  4	145.5	18.7	 16
259	  4	64.5	10.3	 16
260	  4	50.3	10.9	 16
261	  4	61.0	13.0	 16
262	  4	49.0	8.6	 16
263	  4	95.3	15.5	 16
264	  4	279.3	26.6	 16
265	  4	78.8	13.1	 16
266	  4	130.3	22.9	 16
267	  4	104.0	22.0	 16
268	  4	71.3	12.1	 16
269	  4	91.8	13.3	 16
270	  4	139.8	26.4	 16
271	  4	81.5	16.6	 16
272	  4	239.3	27.5	 16
273	  4	976.3	62.7	 16
274	  4	428.5	41.0	 16
275	  4	231.0	24.6	 16
276	  4	101.0	14.3	 16
277	  4	133.0	18.7	 16
278	  4	121.3	13.1	 16
279	  4	116.8	20.6	 16
280	  4	93.3	13.9	 16
281	  4	75.8	17.0	 16
282	  4	68.3	8.1	 16
283	  4	110.8	13.8	 16
284	  4	96.5	18.5	 16
285	  4	218.0	28.7	 16
286	  4	134.0	23.7	 16
287	  4	139.8	18.4	 16
288	  4	89.3	14.8	 16
289	  4	73.3	15.3	 16
290	  4	91.0	13.5	 16
291	  4	53.8	8.6	 16
292	  4	145.5	27.2	 16
293	  4	297.3	53.7	 16
294	  4	106.5	16.9	 16
295	  4	77.8	13.7	 16
296	  4	69.3	10.2	 16
297	  4	223.5	61.5	 16
298	  4	162.3	23.4	 16
299	  4	201.8	28.9	 16
300	  4	109.8	27.1	 16
301	  4	71.3	15.6	 16
302	  4	80.5	11.3	 16
303	  4	95.8	18.0	 16
304	  4	162.5	23.3	 16
305	  4	58.0	11.4	 16
306	  4	57.0	6.5	 16
307	  4	79.0	12.6	 16
308	  4	69.5	14.9	 16
309	  4	501.3	91.8	 20
310	  4	599.0	101.4	 16
311	  4	128.3	20.9	 16
312	  4	198.8	23.6	 16
313	  4	320.8	43.8	 16
314	  4	161.5	27.5	 16
315	  4	120.0	23.1	 16
316	  4	334.8	59.9	 16
317	  4	73.0	14.0	 16
318	  4	64.8	13.9	 16
319	  4	68.0	11.1	 16
320	  4	139.0	27.2	 16
321	  4	170.8	31.7	 16
322	  4	86.5	19.2	 16
323	  4	98.3	15.8	 16
324	  4	97.8	17.8	 16
325	  4	164.3	16.0	 16
326	  4	149.8	29.9	 16
327	  4	61.8	12.6	 16
328	  4	168.5	20.1	 16
329	  4	400.0	51.3	 16
330	  4	65.5	11.0	 16
331	  4	64.3	13.5	 16
332	  4	62.3	9.2	 16
333	  4	60.0	8.1	 16
334	  4	64.5	11.1	 16
335	  4	61.0	13.3	 16
336	  4	59.5	11.3	 16
337	  4	65.5	13.3	 16
338	  4	70.3	16.9	 16
339	  4	50.0	9.6	 16
340	  4	66.0	8.3	 16
341	  4	615.0	53.9	 16
342	  4	75.8	12.1	 16
343	  4	104.0	14.1	 16
344	  4	102.3	10.8	 16
345	  4	123.0	18.8	 16
346	  4	93.0	15.4	 16
347	  4	77.0	13.7	 16
348	  4	458.8	45.2	 16
349	  4	135.5	11.3	 16
350	  4	64.5	10.5	 16
351	  4	74.5	14.8	 16
352	  4	90.0	14.4	 16
353	  4	78.5	10.8	 16
354	  4	77.3	13.1	 16
355	  4	118.5	19.0	 16
356	  4	71.3	12.2	 16
357	  4	146.0	23.3	 16
358	  4	55.0	6.5	 16
359	  4	61.3	8.9	 16
360	  4	73.3	18.6	 16
361	  4	331.0	38.1	 16
362	  4	407.8	48.5	 16
363	  4	438.0	35.4	 16
364	  4	202.0	24.6	 16
365	  4	408.3	33.7	 16
366	  4	71.8	12.3	 16
367	  4	83.8	12.0	 16
368	  4	72.3	10.5	 16
369	  4	100.3	16.4	 16
370	  4	93.8	11.5	 16
371	  4	199.0	19.0	 16
372	  4	119.5	20.6	 16
373	  4	351.8	45.8	 16
374	  4	54.3	10.8	 16
375	  4	72.8	13.6	 16
376	  4	103.5	16.0	 16
377	  4	68.3	13.1	 16
378	  4	101.8	11.6	 16
379	  4	89.3	13.6	 16
380	  4	230.3	72.1	 16
381	  4	1490.0	124.4	 16
382	  4	548.5	56.0	 16
383	  4	555.8	76.0	 16
384	  4	89.8	15.2	 16
385	  4	58.5	10.8	 16
386	  4	52.3	7.4	 16
387	  4	185.0	28.5	 16
388	  4	58.3	10.5	 16
389	  4	102.0	14.6	 16
390	  4	76.0	14.0	 16
391	  4	60.5	11.8	 16
392	  4	90.0	16.3	 16
393	  4	73.3	16.2	 16
394	  4	108.8	19.9	 16
395	  4	169.3	22.7	 16
396	  4	207.3	26.9	 16
397	  4	82.3	15.8	 16
398	  4	77.3	13.0	 16
399	  4	78.0	7.3	 16
400	  4	248.3	39.0	 16
401	  4	149.0	31.6	 16
402	  4	118.0	24.7	 16
403	  4	61.3	18.5	 16
404	  4	65.0	11.3	 16
405	  4	145.3	20.2	 16
406	  4	108.5	15.6	 16
407	  4	167.0	23.4	 16
408	  4	89.5	14.6	 16
409	  4	77.3	15.2	 16
410	  4	98.0	14.3	 16
411	  4	309.8	36.4	 16
412	  4	354.3	32.9	 16
413	  4	901.3	66.1	 16
414	  4	66.5	9.1	 16
415	  4	85.3	11.3	 16
416	  4	81.5	18.8	 16
417	  4	71.0	12.9	 16
418	  4	85.8	14.4	 16
419	  4	214.5	32.7	 16
420	  4	63.8	12.7	 16
421	  4	93.0	14.9	 16
422	  4	142.0	23.0	 16
423	  4	132.5	19.2	 16
424	  4	101.3	15.3	 16
425	  4	355.5	55.5	 16
426	  4	52.0	11.0	 16
427	  4	58.8	8.0	 16
428	  4	57.0	8.6	 20
429	  4	287.5	47.0	 16
430	  4	212.5	26.8	 16
431	  4	82.0	15.1	 16
432	  4	74.0	15.3	 16
433	  4	133.3	38.9	 16
434	  4	156.3	29.0	 16
435	  4	62.0	10.5	 16
436	  4	51.8	8.4	 16
437	  4	64.0	12.3	 16
438	  4	63.5	11.8	 16
439	  4	109.5	14.9	 16
440	  4	95.3	21.7	 16
441	  4	94.3	16.4	 16
442	  4	84.3	12.4	 16
443	  4	495.8	62.0	 16
444	  4	116.3	13.1	 16
445	  4	60.0	8.0	 16
446	  4	67.5	11.5	 16
447	  4	54.5	11.1	 16
448	  4	84.0	19.4	 16
449	  4	109.0	24.5	 16
450	  4	180.8	32.8	 16
451	  4	54.8	8.8	 16
452	  4	120.3	22.3	 16
453	  4	359.5	21.8	 16
454	  4	655.3	46.3	 16
455	  4	180.0	22.6	 16
456	  4	231.5	33.2	 16
457	  4	114.8	21.4	 16
458	  4	53.5	10.7	 16
459	  4	113.5	15.4	 16
460	  4	487.5	85.6	 16
461	  4	1223.0	112.1	 16
462	  4	66.3	13.0	 16
463	  4	54.5	9.8	 16
464	  4	369.5	44.4	 16
465	  4	559.3	44.5	 16
466	  4	613.0	57.6	 16
467	  4	594.5	100.8	 16
468	  4	159.3	29.0	 16
469	  4	70.3	13.8	 16
470	  4	294.0	33.8	 16
471	  4	65.5	10.4	 16
472	  4	50.8	12.5	 16
473	  4	49.3	10.7	 16
474	  4	42.3	6.3	 16
475	  4	48.0	11.1	 16
476	  4	44.5	10.3	 16
477	  4	113.3	17.8	 16
478	  4	67.3	16.0	 16
479	  4	121.3	23.9	 16
480	  4	60.5	10.7	 16
481	  4	64.8	13.0	 16
482	  4	84.3	11.2	 16
483	  4	122.3	19.7	 16
484	  4	67.0	13.2	 16
485	  4	139.3	20.2	 16
486	  4	70.3	13.0	 16
487	  4	68.5	12.4	 16
488	  4	129.0	15.9	 16
489	  4	61.3	13.4	 16
490	  4	62.0	10.7	 16
491	  4	62.0	10.4	 16
492	  4	76.3	13.3	 16
493	  4	89.5	18.4	 16
494	  4	59.5	10.8	 16
495	  4	420.0	32.5	 16
496	  4	92.3	11.6	 16
497	  4	573.0	41.6	 16
498	  4	96.5	16.8	 16
499	  4	69.3	14.3	 16
500	  4	100.5	15.2	 16
501	  4	184.3	27.6	 16
502	  4	203.3	25.5	 16
503	  4	55.0	6.0	 16
504	  4	60.0	11.9	 16
505	  4	1683.8	187.3	 16
506	  4	96.5	16.4	 16
507	  4	140.5	19.8	 16
508	  4	110.3	18.4	 16
509	  4	132.5	14.6	 16
510	  4	280.0	32.3	 16
511	  4	181.0	29.0	 16
512	  4	281.8	51.1	 16
513	  4	49.3	9.3	 16
514	  4	63.0	9.1	 16
515	  4	55.0	7.5	 16
516	  4	115.0	16.2	 16
517	  4	128.5	21.6	 16
518	  4	82.0	16.8	 16
519	  4	91.3	15.0	 16
520	  4	67.8	15.4	 16
521	  4	73.3	12.3	 16
522	  4	222.8	23.7	 16
523	  4	178.8	22.0	 16
524	  4	114.5	25.1	 16
525	  4	54.3	9.3	 16
526	  4	75.3	14.2	 16
527	  4	69.0	12.7	 16
528	  4	76.3	10.3	 16
529	  4	89.0	16.3	 16
530	  4	57.5	9.4	 16
531	  4	57.3	8.5	 16
532	  4	76.3	14.1	 16
533	  4	48.3	10.1	 16
534	  4	134.5	22.3	 16
535	  4	174.3	24.5	 16
536	  4	120.0	19.7	 16
537	  4	104.8	15.0	 16
538	  4	82.5	13.3	 16
539	  4	105.8	21.5	 16
540	  4	54.3	8.0	 16
541	  4	108.5	21.3	 16
542	  4	112.5	17.8	 16
543	  4	350.5	45.3	 16
544	  4	247.8	34.7	 16
545	  4	135.8	26.9	 16
546	  4	103.8	19.2	 20
547	  4	126.8	23.7	 16
548	  4	265.0	31.4	 16
549	  4	78.3	14.1	 16
550	  4	56.3	7.9	 16
551	  4	56.5	14.9	 16
552	  4	105.0	20.3	 16
553	  4	62.5	13.7	 16
554	  4	285.5	52.9	 16
555	  4	50.0	10.8	 16
556	  4	90.8	11.5	 16
557	  4	76.3	14.4	 16
558	  4	125.0	23.5	 16
559	  4	265.8	27.7	 16
560	  4	768.5	73.4	 16
561	  4	884.0	75.3	 16
562	  4	390.8	35.5	 16
563	  4	84.8	18.2	 16
564	  4	278.5	35.6	 16
565	  4	193.3	31.8	 16
566	  4	594.8	67.1	 16
567	  4	44.3	9.0	 16
568	  4	83.3	12.5	 16
569	  4	79.3	13.9	 16
570	  4	57.8	12.4	 16
571	  4	51.5	9.1	 16
572	  4	235.5	45.5	 16
573	  4	71.3	11.2	 16
574	  4	75.3	12.0	 16
575	  4	175.5	37.0	 16
576	  4	126.5	28.2	 16
577	  4	224.5	24.8	 16
578	  4	63.3	8.2	 16
579	  4	107.0	13.1	 16
580	  4	115.3	15.2	 16
581	  4	133.8	19.1	 16
582	  4	148.8	19.4	 16
583	  4	119.3	15.6	 16
584	  4	170.3	29.6	 16
585	  4	284.8	35.0	 16
586	  4	77.5	20.6	 16
587	  4	78.8	15.0	 16
588	  4	139.3	23.8	 16
589	  4	142.0	23.4	 16
590	  4	94.0	14.0	 16
591	  4	92.0	18.8	 16
592	  4	129.3	22.8	 16
593	  4	112.5	20.1	 16
594	  4	69.5	9.8	 16
595	  4	92.0	12.7	 16
596	  4	87.8	15.4	 16
597	  4	98.3	10.7	 16
598	  4	78.8	12.6	 16
599	  4	83.5	10.6	 16
600	  4	184.0	22.3	 16
601	  4	200.8	24.8	 16
602	  4	293.3	36.7	 16
603	  4	573.0	49.0	 16
604	  4	118.3	16.3	 16
605	  4	352.3	26.5	 16
606	  4	99.8	21.6	 16
607	  4	84.0	12.9	 16
608	  4	170.3	30.6	 16
609	  4	146.5	23.3	 16
610	  4	141.5	20.1	 16
611	  4	110.5	16.5	 16
612	  4	59.8	8.4	 16
613	  4	48.5	9.7	 16
614	  4	122.8	21.1	 16
615	  4	57.5	8.9	 16
616	  4	91.0	14.7	 16
617	  4	158.3	43.3	 16
618	  4	67.3	10.8	 16
619	  4	65.5	11.7	 16
620	  4	398.0	66.5	 16
621	  4	82.5	17.8	 16
622	  4	55.0	7.8	 16
623	  4	62.8	11.7	 16
624	  4	57.3	10.0	 16
625	  4	154.8	19.9	 16
626	  4	80.3	10.9	 16
627	  4	252.8	33.8	 16
628	  4	188.8	20.5	 16
629	  4	275.8	22.7	 16
630	  4	76.8	11.6	 16
631	  4	131.0	13.9	 16
632	  4	71.5	15.2	 16
633	  4	102.0	17.9	 16
634	  4	95.5	15.6	 16
635	  4	91.3	17.4	 16
636	  4	215.5	42.2	 16
637	  4	252.0	43.4	 16
638	  4	96.0	16.2	 16
639	  4	112.3	22.0	 16
640	  4	164.8	35.6	 16
641	  4	65.0	14.5	 16
642	  4	63.0	9.6	 16
643	  4	85.0	19.3	 16
644	  4	194.5	26.5	 16
645	  4	182.0	29.0	 16
646	  4	230.0	47.8	 16
647	  4	66.0	12.4	 16
648	  4	98.0	11.6	 16
649	  4	75.3	9.8	 16
650	  4	54.3	11.1	 16
651	  4	111.5	20.8	 16
652	  4	59.3	8.3	 16
653	  4	58.0	8.3	 16
654	  4	53.0	7.8	 16
655	  4	68.5	13.0	 16
656	  4	85.3	15.3	 16
657	  4	56.5	9.6	 16
658	  4	59.0	7.0	 16
659	  4	58.8	10.1	 16
660	  4	73.0	12.3	 16
661	  4	180.3	33.1	 16
662	  4	112.0	14.5	 16
663	  4	302.0	55.8	 16
664	  4	75.8	12.2	 16
665	  4	85.0	11.0	 20
666	  4	443.3	43.3	 16
667	  4	73.5	15.0	 16
668	  4	70.0	14.3	 16
669	  4	74.8	14.6	 16
670	  4	86.3	22.3	 16
671	  4	250.0	59.0	 16
672	  4	107.8	11.2	 16
673	  4	535.8	44.3	 16
674	  4	256.5	29.4	 16
675	  4	280.5	21.2	 16
676	  4	67.5	15.3	 16
677	  4	111.8	28.3	 16
678	  4	54.8	10.4	 16
679	  4	68.5	12.7	 16
680	  4	172.3	20.4	 16
681	  4	58.3	11.3	 16
682	  4	65.0	11.3	 16
683	  4	55.3	7.6	 16
684	  4	57.8	14.3	 16
685	  4	93.3	16.7	 16
686	  4	128.3	14.3	 16
687	  4	78.5	15.4	 16
688	  4	65.8	10.9	 16
689	  4	70.3	11.6	 16
690	  4	1038.5	53.2	 16
691	  4	159.8	29.1	 16
692	  4	472.3	44.4	 16
693	  4	95.3	18.3	 16
694	  4	122.5	16.5	 16
695	  4	179.0	23.4	 16
696	  4	208.3	28.6	 16
697	  4	55.0	6.7	 16
698	  4	78.3	17.4	 16
699	  4	109.0	19.3	 16
700	  4	195.3	36.1	 16
701	  4	136.0	22.2	 16
702	  4	191.5	24.1	 16
703	  4	302.3	34.2	 16
704	  4	273.5	38.3	 16
705	  4	406.0	42.3	 16
706	  4	100.3	12.9	 16
707	  4	50.5	9.6	 16
708	  4	55.0	14.2	 16
709	  4	57.5	10.1	 16
710	  4	54.8	9.6	 16
711	  4	50.8	8.4	 16
  0	  5	90.0	14.8	 16
  1	  5	65.3	10.2	 16
  2	  5	83.5	15.4	 16
  3	  5	240.8	29.5	 16
  4	  5	67.3	8.4	 16
  5	  5	427.5	52.6	 16
  6	  5	1347.8	126.1	 16
  7	  5	154.8	23.0	 16
  8	  5	92.8	15.1	 16
  9	  5	182.5	29.2	 16
 10	  5	139.3	15.5	 16
 11	  5	67.8	10.0	 16
 12	  5	146.3	28.3	 16
 13	  5	6907.0	734.8	 16
 14	  5	7302.8	659.4	 16
 15	  5	6967.8	525.5	 16
 16	  5	131.3	18.5	 16
 17	  5	74.5	9.8	 16
 18	  5	101.3	16.4	 16
 19	  5	110.3	12.9	 16
 20	  5	115.8	20.1	 16
 21	  5	100.5	17.2	 16
 22	  5	100.5	15.1	 16
 23	  5	66.3	11.8	 16
 24	  5	104.0	12.9	 16
 25	  5	94.0	12.5	 16
 26	  5	107.5	17.6	 16
 27	  5	102.0	16.4	 16
 28	  5	88.8	11.3	 16
 29	  5	64.0	12.6	 16
 30	  5	110.5	23.2	 16
 31	  5	90.8	12.9	 16
 32	  5	115.8	23.1	 16
 33	  5	113.0	19.7	 16
 34	  5	118.0	18.7	 16
 35	  5	79.3	10.7	 16
 36	  5	109.3	12.3	 16
 37	  5	6319.8	917.2	 16
 38	  5	6599.3	946.7	 16
 39	  5	6624.8	1007.3	 16
 40	  5	108.8	10.8	 16
 41	  5	78.3	13.4	 16
 42	  5	6842.5	516.1	 16
 43	  5	126.0	12.3	 16
 44	  5	130.3	18.2	 16
 45	  5	142.0	17.6	 16
 46	  5	116.5	15.6	 16
 47	  5	70.8	11.2	 16
 48	  5	115.5	16.3	 16
 49	  5	103.8	24.2	 16
 50	  5	93.5	14.5	 16
 51	  5	94.8	12.1	 16
 52	  5	102.0	14.7	 16
 53	  5	108.3	12.7	 16
 54	  5	152.5	16.1	 16
 55	  5	158.3	24.5	 16
 56	  5	106.0	8.5	 16
 57	  5	97.0	17.0	 16
 58	  5	93.5	18.2	 16
 59	  5	64.5	11.4	 16
 60	  5	66.3	8.6	 16
 61	  5	69.3	11.5	 16
 62	  5	6585.0	1196.9	 16
 63	  5	118.8	16.6	 16
 64	  5	119.0	18.2	 16
 65	  5	113.5	14.3	 16
 66	  5	5346.5	340.9	 16
 67	  5	90.3	15.0	 16
 68	  5	125.5	11.9	 16
 69	  5	6049.0	398.5	 16
 70	  5	5901.8	308.1	 16
 71	  5	5455.0	317.9	 16
 72	  5	103.3	9.8	 16
 73	  5	77.0	10.4	 16
 74	  5	96.3	13.5	 20
 75	  5	91.3	10.2	 16
 76	  5	89.5	12.2	 16
 77	  5	91.0	17.6	 16
 78	  5	87.0	12.1	 16
 79	  5	73.5	16.8	 16
 80	  5	5841.8	1350.5	 16
 81	  5	143.5	23.2	 16
 82	  5	132.3	18.8	 16
 83	  5	131.3	25.8	 16
 84	  5	5683.0	1317.1	 16
 85	  5	76.3	11.8	 16
 86	  5	98.3	10.8	 16
 87	  5	110.0	11.8	 16
 88	  5	6020.3	1272.8	 16
 89	  5	106.3	16.4	 16
 90	  5	100.0	21.7	 16
 91	  5	66.3	9.6	 16
 92	  5	110.8	15.4	 16
 93	  5	5442.5	431.0	 16
 94	  5	5091.0	738.8	 16
 95	  5	111.3	15.2	 16
 96	  5	121.3	20.1	 16
 97	  5	72.3	20.8	 16
 98	  5	107.3	14.4	 16
 99	  5	5699.8	330.0	 16
100	  5	5598.3	588.8	 16
101	  5	123.0	16.5	 16
102	  5	99.0	19.9	 16
103	  5	60.0	12.6	 16
104	  5	105.8	16.8	 16
105	  5	103.5	17.7	 16
106	  5	5237.5	631.5	 16
107	  5	146.3	22.3	 16
108	  5	141.5	25.6	 16
109	  5	64.5	13.6	 16
110	  5	59.5	10.3	 16
111	  5	121.8	19.9	 16
112	  5	246.8	32.9	 16
113	  5	83.5	12.7	 16
114	  5	72.3	10.8	 16
115	  5	150.8	26.6	 16
116	  5	95.0	14.3	 16
117	  5	162.3	33.2	 16
118	  5	6971.0	1406.8	 16
119	  5	324.8	28.5	 16
120	  5	76.0	10.1	 16
121	  5	76.8	9.9	 16
122	  5	64.0	11.1	 16
123	  5	82.5	13.8	 16
124	  5	60.0	10.5	 16
125	  5	72.3	11.5	 16
126	  5	696.0	71.7	 16
127	  5	86.8	13.6	 16
128	  5	1473.0	157.3	 16
129	  5	387.3	24.6	 16
130	  5	204.0	26.6	 16
131	  5	275.0	29.2	 16
132	  5	66.0	14.6	 16
133	  5	255.0	43.3	 16
134	  5	180.3	23.8	 16
135	  5	137.5	17.3	 16
136	  5	68.3	10.3	 16
137	  5	73.0	15.1	 16
138	  5	64.5	9.5	 16
139	  5	713.5	87.3	 16
140	  5	65.3	10.1	 16
141	  5	514.0	93.9	 16
142	  5	69.0	12.8	 16
143	  5	1095.0	215.1	 16
144	  5	148.0	24.0	 16
145	  5	72.0	9.2	 16
146	  5	96.5	17.1	 16
147	  5	731.5	54.4	 16
148	  5	76.5	12.3	 16
149	  5	98.0	11.8	 16
150	  5	176.8	20.9	 16
151	  5	82.3	13.1	 16
152	  5	352.3	51.3	 16
153	  5	329.5	40.9	 16
154	  5	494.0	45.4	 16
155	  5	76.0	13.4	 16
156	  5	130.0	20.7	 16
157	  5	215.0	20.3	 16
158	  5	233.8	23.4	 16
159	  5	446.5	51.0	 16
160	  5	139.5	16.0	 16
161	  5	184.0	24.2	 16
162	  5	230.3	27.4	 16
163	  5	129.3	18.3	 16
164	  5	123.8	20.3	 16
165	  5	990.5	153.3	 16
166	  5	240.3	36.9	 16
167	  5	144.3	24.7	 16
168	  5	84.0	16.5	 16
169	  5	595.5	121.8	 16
170	  5	176.0	43.3	 16
171	  5	206.3	36.4	 16
172	  5	478.3	66.2	 16
173	  5	73.8	11.3	 16
174	  5	1118.8	114.0	 16
175	  5	174.3	24.4	 16
176	  5	64.3	10.7	 16
177	  5	62.3	9.4	 16
178	  5	52.8	9.7	 16
179	  5	144.3	21.2	 16
180	  5	762.5	108.7	 16
181	  5	948.8	111.1	 16
182	  5	165.5	27.5	 16
183	  5	96.0	14.2	 16
184	  5	55.3	8.1	 16
185	  5	606.8	72.0	 16
186	  5	251.0	36.5	 16
187	  5	52.0	9.7	 16
188	  5	130.0	15.8	 16
189	  5	74.5	12.5	 16
190	  5	79.8	18.0	 16
191	  5	77.3	9.0	 16
192	  5	170.0	28.8	 16
193	  5	534.5	111.8	 20
194	  5	239.3	40.4	 16
195	  5	231.0	47.2	 16
196	  5	220.0	32.6	 16
197	  5	196.8	24.3	 16
198	  5	167.0	29.8	 16
199	  5	73.0	11.7	 16
200	  5	190.3	29.3	 16
201	  5	100.3	16.4	 16
202	  5	95.8	19.0	 16
203	  5	114.3	20.9	 16
204	  5	134.0	24.6	 16
205	  5	63.3	10.6	 16
206	  5	631.5	79.2	 16
207	  5	59.3	11.5	 16
208	  5	54.0	10.6	 16
209	  5	114.3	17.4	 16
210	  5	294.5	35.3	 16
211	  5	68.8	16.4	 16
212	  5	112.8	19.6	 16
213	  5	409.3	59.0	 16
214	  5	664.0	65.1	 16
215	  5	88.0	11.5	 16
216	  5	166.3	25.5	 16
217	  5	1335.5	208.7	 16
218	  5	72.3	14.3	 16
219	  5	68.8	25.2	 16
220	  5	64.8	9.7	 16
221	  5	316.8	70.8	 16
222	  5	107.5	17.2	 16
223	  5	76.3	11.3	 16
224	  5	162.5	20.5	 16
225	  5	56.5	12.2	 16
226	  5	130.3	28.5	 16
227	  5	448.3	43.0	 16
228	  5	99.0	20.3	 16
229	  5	373.8	28.3	 16
230	  5	78.3	9.6	 16
231	  5	311.0	38.1	 16
232	  5	61.0	8.8	 16
233	  5	228.8	43.5	 16
234	  5	72.0	15.4	 16
235	  5	496.0	56.6	 16
236	  5	64.3	12.7	 16
237	  5	113.0	14.5	 16
238	  5	134.0	26.1	 16
239	  5	505.5	68.8	 16
240	  5	69.0	12.6	 16
241	  5	92.0	18.5	 16
242	  5	87.3	10.7	 16
243	  5	324.5	49.7	 16
244	  5	96.8	14.1	 16
245	  5	562.0	81.7	 16
246	  5	442.5	81.2	 16
247	  5	190.0	38.3	 16
248	  5	250.0	43.0	 16
249	  5	109.8	23.9	 16
250	  5	96.3	17.3	 16
251	  5	3244.5	318.0	 16
252	  5	49.3	10.1	 16
253	  5	54.0	7.7	 16
254	  5	53.3	11.2	 16
255	  5	760.3	109.1	 16
256	  5	1385.0	136.2	 16
257	  5	125.0	17.2	 16
258	  5	181.8	28.7	 16
259	  5	49.0	9.1	 16
260	  5	55.0	8.0	 16
261	  5	76.8	14.6	 16
262	  5	451.0	66.9	 16
263	  5	53.3	15.1	 16
264	  5	119.5	17.1	 16
265	  5	86.3	22.7	 16
266	  5	56.3	6.7	 16
267	  5	159.0	35.9	 16
268	  5	82.0	6.9	 16
269	  5	123.8	25.3	 16
270	  5	77.8	11.9	 16
271	  5	1385.0	265.9	 16
272	  5	532.0	108.5	 16
273	  5	76.8	14.9	 16
274	  5	85.0	13.8	 16
275	  5	73.5	14.5	 16
276	  5	63.0	24.1	 16
277	  5	57.5	9.1	 16
278	  5	561.0	57.3	 16
279	  5	119.3	17.0	 16
280	  5	117.5	19.4	 16
281	  5	1239.5	74.2	 16
282	  5	1306.0	85.2	 16
283	  5	476.5	49.3	 16
284	  5	143.5	23.8	 16
285	  5	608.0	60.6	 16
286	  5	61.3	16.2	 16
287	  5	142.0	25.4	 16
288	  5	281.5	27.4	 16
289	  5	225.0	29.7	 16
290	  5	2427.8	208.5	 16
291	  5	179.3	22.0	 16
292	  5	202.5	32.2	 16
293	  5	236.5	49.7	 16
294	  5	1245.3	146.4	 16
295	  5	535.0	79.3	 16
296	  5	159.5	21.8	 16
297	  5	128.3	19.7	 16
298	  5	166.8	37.3	 16
299	  5	50.0	9.6	 16
300	  5	3277.8	608.4	 16
301	  5	140.3	27.4	 16
302	  5	904.3	168.0	 16
303	  5	1462.8	196.3	 16
304	  5	72.5	7.6	 16
305	  5	79.0	13.4	 16
306	  5	1099.0	129.5	 16
307	  5	74.8	9.7	 16
308	  5	396.8	50.4	 16
309	  5	155.0	21.6	 16
310	  5	100.8	15.3	 16
311	  5	353.8	51.8	 16
312	  5	274.8	41.7	 20
313	  5	459.8	73.9	 16
314	  5	344.5	64.7	 16
315	  5	300.8	57.9	 16
316	  5	137.0	22.2	 16
317	  5	260.3	51.8	 16
318	  5	219.5	28.3	 16
319	  5	153.3	34.4	 16
320	  5	55.8	11.2	 16
321	  5	117.3	21.7	 16
322	  5	82.8	13.7	 16
323	  5	73.3	18.1	 16
324	  5	157.8	24.1	 16
325	  5	135.0	27.6	 16
326	  5	248.8	46.0	 16
327	  5	226.5	40.4	 16
328	  5	62.0	12.9	 16
329	  5	382.5	65.1	 16
330	  5	650.5	63.7	 16
331	  5	116.8	20.2	 16
332	  5	180.3	30.1	 16
333	  5	683.3	82.8	 16
334	  5	205.0	26.4	 16
335	  5	66.8	12.6	 16
336	  5	112.3	15.1	 16
337	  5	82.3	18.8	 16
338	  5	82.0	14.4	 16
339	  5	68.8	9.0	 16
340	  5	150.0	22.0	 16
341	  5	339.8	43.8	 16
342	  5	60.0	13.1	 16
343	  5	57.3	12.0	 16
344	  5	98.5	13.7	 16
345	  5	117.0	21.9	 16
346	  5	114.0	15.9	 16
347	  5	3513.0	384.2	 16
348	  5	114.8	14.6	 16
349	  5	322.5	44.5	 16
350	  5	171.8	22.5	 16
351	  5	404.0	47.7	 16
352	  5	378.0	39.1	 16
353	  5	132.0	24.8	 16
354	  5	146.0	20.8	 16
355	  5	4921.8	894.1	 16
356	  5	79.5	12.2	 16
357	  5	348.0	28.9	 16
358	  5	196.3	22.3	 16
359	  5	79.3	13.1	 16
360	  5	101.5	13.3	 16
361	  5	191.0	20.8	 16
362	  5	764.3	74.0	 16
363	  5	54.8	11.5	 16
364	  5	62.3	10.7	 16
365	  5	79.3	15.1	 16
366	  5	81.3	11.1	 16
367	  5	1850.3	188.2	 16
368	  5	299.8	35.0	 16
369	  5	413.3	48.1	 16
370	  5	66.8	9.7	 16
371	  5	244.0	17.2	 16
372	  5	402.0	45.2	 16
373	  5	94.5	11.2	 16
374	  5	78.0	10.8	 16
375	  5	76.0	9.5	 16
376	  5	77.0	13.8	 16
377	  5	110.8	20.9	 16
378	  5	125.5	16.3	 16
379	  5	108.0	18.6	 16
380	  5	159.0	22.6	 16
381	  5	95.5	18.0	 16
382	  5	270.0	28.9	 16
383	  5	320.3	30.7	 16
384	  5	93.3	13.2	 16
385	  5	115.5	19.8	 16
386	  5	196.0	25.0	 16
387	  5	399.5	42.6	 16
388	  5	413.5	37.8	 16
389	  5	1555.0	149.2	 16
390	  5	118.0	17.5	 16
391	  5	100.3	18.6	 16
392	  5	778.8	73.2	 16
393	  5	125.3	14.4	 16
394	  5	150.3	23.4	 16
395	  5	72.3	13.0	 16
396	  5	59.3	8.6	 16
397	  5	258.5	32.4	 16
398	  5	819.0	127.0	 16
399	  5	485.8	92.3	 16
400	  5	561.5	89.0	 16
401	  5	241.8	38.6	 16
402	  5	258.8	36.8	 16
403	  5	59.0	7.6	 16
404	  5	308.3	42.9	 16
405	  5	60.0	11.5	 16
406	  5	103.5	14.5	 16
407	  5	130.8	18.3	 16
408	  5	189.0	25.6	 16
409	  5	76.3	13.0	 16
410	  5	112.8	16.7	 16
411	  5	195.0	30.2	 16
412	  5	72.3	12.5	 16
413	  5	137.8	17.5	 16
414	  5	139.3	23.3	 16
415	  5	6513.8	581.1	 16
416	  5	7066.0	386.2	 16
417	  5	468.8	55.8	 16
418	  5	115.3	16.0	 16
419	  5	307.8	30.3	 16
420	  5	72.3	13.0	 16
421	  5	92.5	16.4	 16
422	  5	55.0	11.2	 16
423	  5	162.5	23.4	 16
424	  5	154.3	35.8	 16
425	  5	128.8	22.8	 16
426	  5	65.3	10.9	 16
427	  5	60.0	13.0	 16
428	  5	78.8	11.4	 16
429	  5	96.0	12.8	 16
430	  5	96.3	13.5	 20
431	  5	98.0	16.6	 16
432	  5	125.5	22.8	 16
433	  5	295.0	69.6	 16
434	  5	353.0	69.9	 16
435	  5	129.5	27.6	 16
436	  5	68.8	14.6	 16
437	  5	72.0	13.1	 16
438	  5	70.5	15.1	 16
439	  5	172.0	26.7	 16
440	  5	146.3	22.7	 16
441	  5	135.0	20.8	 16
442	  5	222.3	40.3	 16
443	  5	279.0	32.6	 16
444	  5	304.5	37.8	 16
445	  5	133.5	20.3	 16
446	  5	247.3	36.2	 16
447	  5	57.5	11.7	 16
448	  5	259.5	48.2	 16
449	  5	2225.3	320.7	 16
450	  5	1156.0	138.9	 16
451	  5	1521.0	236.6	 16
452	  5	348.8	45.2	 16
453	  5	215.5	26.8	 16
454	  5	910.3	169.4	 16
455	  5	363.8	80.7	 16
456	  5	70.3	10.2	 16
457	  5	120.0	22.5	 16
458	  5	368.3	51.9	 16
459	  5	89.8	11.1	 16
460	  5	128.0	26.5	 16
461	  5	411.0	48.8	 16
462	  5	85.3	16.3	 16
463	  5	752.5	70.1	 16
464	  5	1808.8	92.1	 16
465	  5	474.3	38.0	 16
466	  5	105.0	23.9	 16
467	  5	92.5	19.1	 16
468	  5	87.0	14.6	 16
469	  5	140.3	14.0	 16
470	  5	97.3	12.5	 16
471	  5	84.0	16.1	 16
472	  5	162.5	18.1	 16
473	  5	144.0	19.9	 16
474	  5	62.3	9.6	 16
475	  5	75.3	12.9	 16
476	  5	369.8	51.1	 16
477	  5	108.3	18.4	 16
478	  5	247.0	29.1	 16
479	  5	304.3	33.5	 16
480	  5	138.0	28.2	 16
481	  5	105.3	18.1	 16
482	  5	184.8	26.2	 16
483	  5	82.3	12.8	 16
484	  5	164.8	27.3	 16
485	  5	769.8	134.2	 16
486	  5	72.3	9.7	 16
487	  5	414.8	90.4	 16
488	  5	101.0	14.3	 16
489	  5	81.5	16.9	 16
490	  5	68.3	14.5	 16
491	  5	355.5	41.1	 16
492	  5	64.0	10.2	 16
493	  5	199.5	36.3	 16
494	  5	94.5	12.4	 16
495	  5	351.3	25.7	 16
496	  5	530.0	50.3	 16
497	  5	154.3	17.1	 16
498	  5	394.8	44.5	 16
499	  5	54.8	10.7	 16
500	  5	81.3	10.6	 16
501	  5	111.5	14.1	 16
502	  5	57.3	10.3	 16
503	  5	614.5	64.1	 16
504	  5	82.0	14.6	 16
505	  5	434.5	50.8	 16
506	  5	57.8	10.1	 16
507	  5	62.3	8.9	 16
508	  5	304.0	44.6	 16
509	  5	6058.5	831.3	 16
510	  5	92.3	14.8	 16
511	  5	493.5	47.3	 16
512	  5	80.5	15.1	 16
513	  5	82.3	20.2	 16
514	  5	75.8	11.4	 16
515	  5	160.3	22.3	 16
516	  5	69.0	10.7	 16
517	  5	308.3	31.5	 16
518	  5	290.0	23.7	 16
519	  5	71.3	9.8	 16
520	  5	84.0	15.3	 16
521	  5	319.0	43.1	 16
522	  5	388.8	50.9	 16
523	  5	184.0	35.1	 16
524	  5	997.5	72.8	 16
525	  5	52.3	9.4	 16
526	  5	154.8	20.0	 16
527	  5	1071.8	157.7	 16
528	  5	79.5	14.0	 16
529	  5	1574.0	215.6	 16
530	  5	429.8	61.3	 16
531	  5	167.0	19.7	 16
532	  5	111.5	16.3	 16
533	  5	187.8	27.4	 16
534	  5	136.5	14.5	 16
535	  5	141.0	14.2	 16
536	  5	719.0	77.4	 16
537	  5	88.3	11.0	 16
538	  5	6195.0	1151.2	 16
539	  5	2257.0	485.5	 16
540	  5	71.3	12.3	 16
541	  5	200.8	24.7	 16
542	  5	594.0	92.0	 16
543	  5	114.8	15.7	 16
544	  5	227.3	47.4	 16
545	  5	222.5	26.3	 16
546	  5	244.3	27.0	 16
547	  5	266.5	36.7	 16
548	  5	152.5	23.1	 16
549	  5	152.0	27.7	 20
550	  5	91.3	32.4	 16
551	  5	233.3	21.9	 16
552	  5	54.0	10.0	 16
553	  5	276.8	51.4	 16
554	  5	97.3	18.3	 16
555	  5	138.0	17.7	 16
556	  5	95.0	16.4	 16
557	  5	160.3	20.6	 16
558	  5	58.5	12.1	 16
559	  5	127.3	25.4	 16
560	  5	180.8	26.2	 16
561	  5	243.8	33.9	 16
562	  5	9733.5	1695.2	 16
563	  5	69.5	12.4	 16
564	  5	70.5	15.9	 16
565	  5	155.8	25.0	 16
566	  5	897.0	140.5	 16
567	  5	1293.5	114.6	 16
568	  5	356.0	30.9	 16
569	  5	230.0	25.8	 16
570	  5	1313.8	78.9	 16
571	  5	77.5	11.7	 16
572	  5	277.5	31.7	 16
573	  5	76.0	15.9	 16
574	  5	85.0	15.9	 16
575	  5	334.8	37.7	 16
576	  5	308.5	35.5	 16
577	  5	86.0	13.0	 16
578	  5	428.5	41.8	 16
579	  5	1487.8	141.7	 16
580	  5	148.8	24.5	 16
581	  5	441.8	55.9	 16
582	  5	614.0	60.0	 16
583	  5	248.3	32.2	 16
584	  5	96.0	14.5	 16
585	  5	129.3	20.0	 16
586	  5	144.3	21.2	 16
587	  5	194.0	26.8	 16
588	  5	124.5	27.6	 16
589	  5	87.0	10.0	 16
590	  5	66.3	12.0	 16
591	  5	70.8	11.5	 16
592	  5	258.8	27.0	 16
593	  5	338.0	38.9	 16
594	  5	127.3	19.2	 16
595	  5	113.3	18.3	 16
596	  5	158.3	25.8	 16
597	  5	425.0	57.9	 16
598	  5	866.3	102.8	 16
599	  5	53.8	12.1	 16
600	  5	133.5	21.9	 16
601	  5	328.5	37.6	 16
602	  5	1157.0	115.8	 16
603	  5	69.8	15.9	 16
604	  5	77.0	16.8	 16
605	  5	71.3	14.9	 16
606	  5	77.0	11.7	 16
607	  5	54.3	7.6	 16
608	  5	56.3	9.2	 16
609	  5	142.0	21.5	 16
610	  5	53.5	7.8	 16
611	  5	61.3	13.5	 16
612	  5	199.8	27.2	 16
613	  5	62.0	10.0	 16
614	  5	109.3	16.3	 16
615	  5	74.5	17.3	 16
616	  5	164.0	24.2	 16
617	  5	343.5	52.9	 16
618	  5	352.0	88.4	 16
619	  5	65.0	10.8	 16
620	  5	60.0	10.1	 16
621	  5	58.3	9.7	 16
622	  5	71.0	10.3	 16
623	  5	143.5	20.7	 16
624	  5	280.5	41.0	 16
625	  5	124.8	18.3	 16
626	  5	513.0	40.8	 16
627	  5	93.3	16.6	 16
628	  5	104.3	17.4	 16
629	  5	313.0	45.7	 16
630	  5	51.3	9.4	 16
631	  5	71.3	11.5	 16
632	  5	255.5	26.4	 16
633	  5	99.5	19.4	 16
634	  5	271.3	48.4	 16
635	  5	102.3	16.9	 16
636	  5	81.0	11.5	 16
637	  5	1013.5	122.1	 16
638	  5	358.5	31.8	 16
639	  5	109.3	22.8	 16
640	  5	206.3	38.6	 16
641	  5	61.8	13.9	 16
642	  5	62.5	13.3	 16
643	  5	147.3	36.7	 16
644	  5	226.3	48.6	 16
645	  5	206.5	44.9	 16
646	  5	91.3	17.5	 16
647	  5	62.3	10.9	 16
648	  5	1166.5	229.8	 16
649	  5	72.0	12.2	 16
650	  5	101.3	20.0	 16
651	  5	379.0	48.2	 16
652	  5	134.8	20.4	 16
653	  5	59.0	11.1	 16
654	  5	137.8	20.1	 16
655	  5	197.8	22.8	 16
656	  5	150.8	21.2	 16
657	  5	2586.0	399.0	 16
658	  5	103.5	19.5	 16
659	  5	412.8	52.3	 16
660	  5	341.5	60.1	 16
661	  5	703.5	147.5	 16
662	  5	119.0	15.1	 16
663	  5	97.5	17.4	 16
664	  5	5211.3	1188.7	 16
665	  5	111.3	14.1	 16
666	  5	426.3	95.1	 16
667	  5	97.8	13.3	 16
668	  5	254.3	37.7	 20
669	  5	561.8	89.0	 16
670	  5	110.0	16.3	 16
671	  5	97.0	16.0	 16
672	  5	155.0	22.0	 16
673	  5	130.5	16.8	 16
674	  5	152.3	19.0	 16
675	  5	130.0	12.8	 16
676	  5	82.8	15.8	 16
677	  5	85.3	10.3	 16
678	  5	254.0	40.5	 16
679	  5	5401.3	439.4	 16
680	  5	76.5	7.6	 16
681	  5	392.3	47.3	 16
682	  5	79.0	14.1	 16
683	  5	128.3	17.9	 16
684	  5	133.3	21.6	 16
685	  5	64.0	10.6	 16
686	  5	69.5	16.2	 16
687	  5	81.5	13.9	 16
688	  5	6868.3	684.0	 16
689	  5	312.8	24.2	 16
690	  5	121.3	16.7	 16
691	  5	840.3	130.9	 16
692	  5	147.5	20.6	 16
693	  5	329.3	43.6	 16
694	  5	353.0	59.4	 16
695	  5	188.0	25.3	 16
696	  5	100.0	17.9	 16
697	  5	105.3	15.4	 16
698	  5	71.3	9.0	 16
699	  5	732.3	69.7	 16
700	  5	64.8	9.6	 16
701	  5	100.0	13.6	 16
702	  5	137.3	20.0	 16
703	  5	283.5	33.5	 16
704	  5	76.8	13.2	 16
705	  5	506.5	51.1	 16
706	  5	189.0	25.2	 16
707	  5	206.0	28.4	 16
708	  5	76.0	16.8	 16
709	  5	115.8	15.5	 16
710	  5	154.5	19.4	 16
711	  5	90.5	13.8	 16
  0	  6	8172.5	640.6	 16
  1	  6	76.0	15.4	 16
  2	  6	72.0	9.3	 16
  3	  6	120.5	16.6	 16
  4	  6	73.5	11.8	 16
  5	  6	140.5	21.1	 16
  6	  6	395.8	43.0	 16
  7	  6	101.3	13.7	 16
  8	  6	104.8	14.9	 16
  9	  6	375.5	33.6	 16
 10	  6	173.3	20.9	 16
 11	  6	61.3	7.5	 16
 12	  6	6515.3	1107.8	 16
 13	  6	134.3	19.4	 16
 14	  6	108.3	14.7	 16
 15	  6	113.0	12.6	 16
 16	  6	6882.0	546.8	 16
 17	  6	71.0	6.6	 16
 18	  6	117.0	20.3	 16
 19	  6	103.8	13.7	 16
 20	  6	113.3	17.3	 16
 21	  6	109.3	16.9	 16
 22	  6	110.0	21.2	 16
 23	  6	76.3	12.9	 16
 24	  6	130.3	18.7	 16
 25	  6	107.0	13.9	 16
 26	  6	119.5	16.1	 16
 27	  6	109.8	12.9	 16
 28	  6	120.3	17.8	 16
 29	  6	69.5	11.1	 16
 30	  6	102.3	13.5	 16
 31	  6	101.8	16.4	 16
 32	  6	111.0	14.5	 16
 33	  6	130.5	18.7	 16
 34	  6	146.8	22.2	 16
 35	  6	87.0	15.1	 16
 36	  6	6528.3	891.4	 16
 37	  6	133.5	24.3	 16
 38	  6	131.0	18.8	 16
 39	  6	135.3	24.4	 16
 40	  6	6557.8	834.7	 16
 41	  6	78.5	12.7	 16
 42	  6	7285.0	527.0	 16
 43	  6	121.5	17.2	 16
 44	  6	127.8	20.2	 16
 45	  6	119.3	18.6	 16
 46	  6	120.0	19.5	 16
 47	  6	85.5	14.6	 16
 48	  6	108.3	15.3	 16
 49	  6	103.5	53.1	 16
 50	  6	111.5	14.3	 16
 51	  6	116.3	17.5	 16
 52	  6	101.0	12.4	 16
 53	  6	86.3	17.8	 16
 54	  6	131.3	14.2	 16
 55	  6	127.0	14.9	 16
 56	  6	118.8	19.7	 16
 57	  6	107.8	15.5	 16
 58	  6	103.8	17.9	 16
 59	  6	65.8	14.9	 16
 60	  6	72.0	9.8	 16
 61	  6	84.0	11.1	 16
 62	  6	7409.0	433.8	 16
 63	  6	123.5	20.8	 16
 64	  6	120.0	14.2	 16
 65	  6	115.0	13.2	 16
 66	  6	6108.0	399.2	 16
 67	  6	95.3	14.6	 16
 68	  6	6878.0	408.1	 16
 69	  6	117.0	20.2	 16
 70	  6	124.3	18.0	 16
 71	  6	113.8	15.5	 16
 72	  6	5924.5	413.4	 16
 73	  6	79.3	14.9	 16
 74	  6	102.8	10.5	 16
 75	  6	94.3	14.1	 16
 76	  6	99.0	16.4	 16
 77	  6	90.3	13.8	 20
 78	  6	90.0	14.6	 16
 79	  6	78.5	14.2	 16
 80	  6	6309.5	1363.1	 16
 81	  6	142.5	15.2	 16
 82	  6	140.3	20.3	 16
 83	  6	125.3	10.9	 16
 84	  6	5780.8	1152.5	 16
 85	  6	85.5	11.4	 16
 86	  6	105.0	12.2	 16
 87	  6	6380.5	984.4	 16
 88	  6	6292.3	1040.5	 16
 89	  6	108.8	18.5	 16
 90	  6	101.8	19.6	 16
 91	  6	73.3	8.4	 16
 92	  6	5696.8	957.2	 16
 93	  6	114.5	16.3	 16
 94	  6	101.3	16.2	 16
 95	  6	5755.8	648.4	 16
 96	  6	108.0	13.9	 16
 97	  6	66.5	12.6	 16
 98	  6	5896.5	676.5	 16
 99	  6	122.0	23.4	 16
100	  6	121.3	21.3	 16
101	  6	5824.8	607.7	 16
102	  6	117.5	21.2	 16
103	  6	64.3	14.2	 16
104	  6	96.8	10.6	 16
105	  6	5738.8	654.4	 16
106	  6	114.3	15.1	 16
107	  6	5905.5	766.6	 16
108	  6	121.0	20.1	 16
109	  6	61.0	11.2	 16
110	  6	52.3	9.7	 16
111	  6	90.3	13.5	 16
112	  6	87.8	15.2	 16
113	  6	73.3	7.3	 16
114	  6	85.8	16.0	 16
115	  6	238.8	53.5	 16
116	  6	132.8	18.8	 16
117	  6	132.0	23.4	 16
118	  6	1006.5	208.9	 16
119	  6	233.8	38.1	 16
120	  6	84.0	15.8	 16
121	  6	92.3	16.2	 16
122	  6	79.8	21.0	 16
123	  6	70.3	14.6	 16
124	  6	68.8	13.5	 16
125	  6	64.0	13.7	 16
126	  6	88.5	16.9	 16
127	  6	81.3	13.7	 16
128	  6	210.8	28.5	 16
129	  6	204.0	20.4	 16
130	  6	165.5	24.6	 16
131	  6	347.5	39.2	 16
132	  6	63.5	9.7	 16
133	  6	164.8	17.9	 16
134	  6	110.3	12.7	 16
135	  6	93.0	17.7	 16
136	  6	82.5	13.0	 16
137	  6	81.5	18.0	 16
138	  6	63.3	11.7	 16
139	  6	296.8	30.0	 16
140	  6	67.8	14.5	 16
141	  6	108.8	21.5	 16
142	  6	67.3	18.5	 16
143	  6	223.0	33.5	 16
144	  6	85.0	13.7	 16
145	  6	75.0	8.9	 16
146	  6	120.8	21.7	 16
147	  6	220.0	17.9	 16
148	  6	65.0	9.9	 16
149	  6	55.5	11.9	 16
150	  6	95.0	17.4	 16
151	  6	83.8	15.5	 16
152	  6	122.5	16.3	 16
153	  6	96.8	12.5	 16
154	  6	76.5	19.1	 16
155	  6	108.0	18.3	 16
156	  6	90.0	18.1	 16
157	  6	158.0	27.9	 16
158	  6	100.8	15.6	 16
159	  6	148.5	21.2	 16
160	  6	141.8	13.1	 16
161	  6	155.8	30.5	 16
162	  6	155.8	25.7	 16
163	  6	156.3	27.2	 16
164	  6	187.8	24.9	 16
165	  6	94.3	13.8	 16
166	  6	149.8	18.3	 16
167	  6	79.5	13.3	 16
168	  6	83.8	15.5	 16
169	  6	151.3	22.8	 16
170	  6	99.8	18.6	 16
171	  6	194.8	18.3	 16
172	  6	107.8	17.7	 16
173	  6	75.0	15.8	 16
174	  6	247.8	47.5	 16
175	  6	81.5	18.5	 16
176	  6	61.0	13.0	 16
177	  6	67.3	10.1	 16
178	  6	58.5	9.7	 16
179	  6	70.0	7.5	 16
180	  6	272.0	38.6	 16
181	  6	110.0	15.1	 16
182	  6	125.8	25.5	 16
183	  6	118.8	22.0	 16
184	  6	61.5	8.1	 16
185	  6	186.5	22.0	 16
186	  6	106.3	24.7	 16
187	  6	77.3	16.2	 16
188	  6	97.3	15.3	 16
189	  6	90.8	22.3	 16
190	  6	105.8	15.9	 16
191	  6	61.8	7.0	 16
192	  6	123.3	20.3	 16
193	  6	101.0	11.8	 16
194	  6	101.0	16.9	 16
195	  6	83.3	13.6	 16
196	  6	149.5	21.9	 20
197	  6	185.3	19.6	 16
198	  6	256.5	39.4	 16
199	  6	255.3	43.1	 16
200	  6	327.3	73.6	 16
201	  6	192.5	37.8	 16
202	  6	179.3	24.6	 16
203	  6	72.0	13.1	 16
204	  6	59.5	11.4	 16
205	  6	53.3	8.4	 16
206	  6	107.3	24.4	 16
207	  6	55.3	8.7	 16
208	  6	52.0	7.1	 16
209	  6	96.0	12.7	 16
210	  6	110.0	22.4	 16
211	  6	85.0	14.4	 16
212	  6	89.3	13.8	 16
213	  6	109.0	26.8	 16
214	  6	222.3	17.3	 16
215	  6	83.3	13.0	 16
216	  6	88.3	13.7	 16
217	  6	278.5	29.1	 16
218	  6	57.3	10.0	 16
219	  6	57.8	9.6	 16
220	  6	61.3	13.4	 16
221	  6	86.3	13.8	 16
222	  6	68.0	13.9	 16
223	  6	105.8	16.7	 16
224	  6	81.5	13.8	 16
225	  6	50.5	9.9	 16
226	  6	70.3	12.7	 16
227	  6	115.5	15.2	 16
228	  6	92.5	19.0	 16
229	  6	314.8	36.4	 16
230	  6	53.5	12.3	 16
231	  6	71.3	11.8	 16
232	  6	68.0	12.6	 16
233	  6	93.8	22.5	 16
234	  6	56.3	15.3	 16
235	  6	182.3	24.9	 16
236	  6	74.5	19.5	 16
237	  6	53.0	10.7	 16
238	  6	104.8	19.4	 16
239	  6	263.3	31.5	 16
240	  6	65.3	10.7	 16
241	  6	50.8	7.7	 16
242	  6	71.0	9.0	 16
243	  6	130.8	24.0	 16
244	  6	84.3	16.1	 16
245	  6	143.3	23.6	 16
246	  6	93.0	11.7	 16
247	  6	54.8	8.8	 16
248	  6	84.5	15.9	 16
249	  6	82.0	11.6	 16
250	  6	60.3	12.0	 16
251	  6	381.0	58.9	 16
252	  6	48.5	6.9	 16
253	  6	56.5	11.8	 16
254	  6	47.0	7.1	 16
255	  6	216.3	37.9	 16
256	  6	417.8	68.6	 16
257	  6	66.3	14.0	 16
258	  6	55.0	11.4	 16
259	  6	51.3	6.5	 16
260	  6	47.0	8.3	 16
261	  6	60.0	11.1	 16
262	  6	101.5	15.4	 16
263	  6	62.8	10.8	 16
264	  6	58.3	10.9	 16
265	  6	59.0	12.9	 16
266	  6	60.3	13.3	 16
267	  6	59.8	9.8	 16
268	  6	71.3	12.1	 16
269	  6	82.3	17.5	 16
270	  6	89.5	33.6	 16
271	  6	209.5	37.6	 16
272	  6	129.0	20.3	 16
273	  6	68.8	15.5	 16
274	  6	61.8	11.9	 16
275	  6	65.3	17.0	 16
276	  6	63.0	12.9	 16
277	  6	52.3	11.1	 16
278	  6	99.8	15.2	 16
279	  6	64.0	15.4	 16
280	  6	77.0	15.6	 16
281	  6	522.0	54.4	 16
282	  6	543.5	50.1	 16
283	  6	230.8	32.7	 16
284	  6	99.3	15.0	 16
285	  6	280.5	23.9	 16
286	  6	55.0	10.8	 16
287	  6	65.0	10.3	 16
288	  6	271.0	37.6	 16
289	  6	261.5	40.2	 16
290	  6	178.5	35.4	 16
291	  6	91.8	16.6	 16
292	  6	94.5	12.0	 16
293	  6	92.0	10.8	 16
294	  6	129.0	17.5	 16
295	  6	79.5	18.9	 16
296	  6	86.3	14.3	 16
297	  6	149.8	23.5	 16
298	  6	69.3	11.7	 16
299	  6	59.0	11.0	 16
300	  6	748.5	72.6	 16
301	  6	72.3	13.6	 16
302	  6	79.5	26.8	 16
303	  6	464.3	102.3	 16
304	  6	136.0	20.0	 16
305	  6	62.3	9.6	 16
306	  6	363.0	57.2	 16
307	  6	64.3	9.9	 16
308	  6	59.3	11.3	 16
309	  6	92.5	16.8	 16
310	  6	53.5	11.2	 16
311	  6	154.8	24.8	 16
312	  6	61.5	11.3	 16
313	  6	91.3	16.4	 16
314	  6	216.3	27.5	 16
315	  6	74.5	13.9	 20
316	  6	90.3	15.2	 16
317	  6	72.0	12.7	 16
318	  6	60.5	7.8	 16
319	  6	59.3	10.2	 16
320	  6	48.3	11.6	 16
321	  6	61.0	7.7	 16
322	  6	61.0	12.3	 16
323	  6	73.3	16.3	 16
324	  6	128.3	16.7	 16
325	  6	168.5	18.7	 16
326	  6	155.5	22.3	 16
327	  6	112.5	22.4	 16
328	  6	132.3	31.5	 16
329	  6	593.5	55.8	 16
330	  6	217.5	30.6	 16
331	  6	92.8	16.2	 16
332	  6	104.0	19.8	 16
333	  6	280.5	43.7	 16
334	  6	70.3	11.7	 16
335	  6	69.5	18.5	 16
336	  6	65.5	13.6	 16
337	  6	88.8	14.3	 16
338	  6	78.3	9.6	 16
339	  6	63.3	12.2	 16
340	  6	137.5	17.7	 16
341	  6	99.5	17.2	 16
342	  6	53.0	9.7	 16
343	  6	52.3	10.1	 16
344	  6	78.3	10.0	 16
345	  6	71.0	8.5	 16
346	  6	68.3	10.7	 16
347	  6	1134.8	123.0	 16
348	  6	51.8	11.1	 16
349	  6	89.5	15.3	 16
350	  6	144.5	20.1	 16
351	  6	523.5	34.4	 16
352	  6	569.0	59.3	 16
353	  6	71.5	11.7	 16
354	  6	53.8	8.7	 16
355	  6	1090.3	85.3	 16
356	  6	65.5	12.5	 16
357	  6	104.0	15.9	 16
358	  6	85.0	10.3	 16
359	  6	81.0	14.3	 16
360	  6	63.0	14.9	 16
361	  6	167.8	21.6	 16
362	  6	252.8	29.9	 16
363	  6	60.3	12.4	 16
364	  6	49.3	7.3	 16
365	  6	72.0	29.9	 16
366	  6	49.8	8.6	 16
367	  6	201.0	19.1	 16
368	  6	82.0	15.1	 16
369	  6	86.0	10.8	 16
370	  6	80.3	14.3	 16
371	  6	367.8	54.0	 16
372	  6	144.5	19.0	 16
373	  6	118.3	13.2	 16
374	  6	67.0	9.8	 16
375	  6	69.0	8.1	 16
376	  6	65.0	11.1	 16
377	  6	67.0	12.2	 16
378	  6	86.5	11.8	 16
379	  6	127.3	21.9	 16
380	  6	136.3	20.4	 16
381	  6	112.0	15.5	 16
382	  6	167.8	23.9	 16
383	  6	340.3	46.1	 16
384	  6	48.0	6.3	 16
385	  6	92.3	11.1	 16
386	  6	81.0	11.4	 16
387	  6	117.5	15.1	 16
388	  6	115.3	16.4	 16
389	  6	546.3	61.5	 16
390	  6	89.5	17.5	 16
391	  6	70.0	12.8	 16
392	  6	240.3	19.0	 16
393	  6	63.5	11.6	 16
394	  6	81.5	18.4	 16
395	  6	56.3	9.6	 16
396	  6	92.3	13.3	 16
397	  6	122.8	19.9	 16
398	  6	166.5	22.0	 16
399	  6	79.5	31.5	 16
400	  6	164.3	22.3	 16
401	  6	144.5	23.5	 16
402	  6	67.0	10.3	 16
403	  6	53.5	8.4	 16
404	  6	107.0	18.4	 16
405	  6	51.8	9.7	 16
406	  6	71.5	11.3	 16
407	  6	143.0	17.8	 16
408	  6	123.5	18.0	 16
409	  6	64.5	13.0	 16
410	  6	113.8	14.3	 16
411	  6	185.0	19.9	 16
412	  6	94.5	23.0	 16
413	  6	76.3	14.0	 16
414	  6	106.8	17.7	 16
415	  6	980.8	93.1	 16
416	  6	1088.5	119.6	 16
417	  6	95.0	15.9	 16
418	  6	140.8	17.7	 16
419	  6	267.0	32.6	 16
420	  6	61.8	11.1	 16
421	  6	56.8	10.4	 16
422	  6	56.5	9.2	 16
423	  6	64.8	10.5	 16
424	  6	71.8	10.6	 16
425	  6	144.8	16.1	 16
426	  6	72.0	15.7	 16
427	  6	60.8	13.2	 16
428	  6	76.3	11.1	 16
429	  6	94.3	15.2	 16
430	  6	69.3	8.0	 16
431	  6	71.5	10.5	 16
432	  6	203.5	33.4	 16
433	  6	130.3	25.3	 20
434	  6	113.8	19.1	 16
435	  6	61.5	14.5	 16
436	  6	54.5	13.9	 16
437	  6	66.5	8.9	 16
438	  6	68.0	11.7	 16
439	  6	175.5	24.6	 16
440	  6	140.0	19.1	 16
441	  6	128.3	14.9	 16
442	  6	272.3	30.1	 16
443	  6	157.3	17.0	 16
444	  6	159.0	21.7	 16
445	  6	121.0	17.3	 16
446	  6	110.8	17.9	 16
447	  6	71.0	12.9	 16
448	  6	964.0	147.6	 16
449	  6	323.5	35.4	 16
450	  6	295.5	28.0	 16
451	  6	173.3	43.0	 16
452	  6	150.5	20.8	 16
453	  6	96.3	16.0	 16
454	  6	456.5	71.2	 16
455	  6	55.0	9.7	 16
456	  6	57.5	13.5	 16
457	  6	89.0	20.0	 16
458	  6	255.3	31.1	 16
459	  6	124.5	21.7	 16
460	  6	57.5	8.4	 16
461	  6	101.0	16.6	 16
462	  6	68.3	10.5	 16
463	  6	173.8	25.0	 16
464	  6	1120.0	117.3	 16
465	  6	455.3	45.8	 16
466	  6	133.5	19.1	 16
467	  6	102.3	14.4	 16
468	  6	66.3	13.2	 16
469	  6	138.3	18.6	 16
470	  6	79.0	12.5	 16
471	  6	103.0	17.4	 16
472	  6	146.5	27.2	 16
473	  6	115.5	14.6	 16
474	  6	54.8	8.4	 16
475	  6	60.5	21.0	 16
476	  6	59.0	8.4	 16
477	  6	88.3	17.1	 16
478	  6	86.0	14.4	 16
479	  6	105.8	17.4	 16
480	  6	67.3	9.1	 16
481	  6	65.5	11.7	 16
482	  6	142.8	29.4	 16
483	  6	73.0	11.9	 16
484	  6	123.3	18.5	 16
485	  6	325.5	62.2	 16
486	  6	94.3	15.1	 16
487	  6	192.5	21.1	 16
488	  6	74.0	13.2	 16
489	  6	84.3	15.8	 16
490	  6	71.3	13.2	 16
491	  6	105.3	16.7	 16
492	  6	67.5	12.7	 16
493	  6	53.8	10.5	 16
494	  6	54.8	12.6	 16
495	  6	150.3	17.8	 16
496	  6	499.3	49.7	 16
497	  6	89.0	15.2	 16
498	  6	145.5	27.5	 16
499	  6	58.0	10.5	 16
500	  6	86.5	15.2	 16
501	  6	151.3	20.5	 16
502	  6	77.5	13.7	 16
503	  6	404.5	46.6	 16
504	  6	62.3	14.0	 16
505	  6	227.8	27.3	 16
506	  6	76.5	10.0	 16
507	  6	84.0	18.2	 16
508	  6	398.5	46.8	 16
509	  6	2439.5	190.1	 16
510	  6	89.3	11.9	 16
511	  6	112.0	15.7	 16
512	  6	59.0	7.9	 16
513	  6	69.3	16.6	 16
514	  6	50.3	7.0	 16
515	  6	58.3	12.7	 16
516	  6	52.0	9.9	 16
517	  6	124.0	19.0	 16
518	  6	89.8	13.0	 16
519	  6	66.3	13.8	 16
520	  6	65.0	10.6	 16
521	  6	217.0	29.3	 16
522	  6	96.8	12.0	 16
523	  6	305.3	39.3	 16
524	  6	554.5	52.4	 16
525	  6	48.5	13.9	 16
526	  6	1050.3	105.9	 16
527	  6	84.3	15.0	 16
528	  6	59.3	8.0	 16
529	  6	201.0	26.6	 16
530	  6	112.8	11.9	 16
531	  6	138.8	18.3	 16
532	  6	148.3	23.3	 16
533	  6	134.8	16.7	 16
534	  6	88.3	17.3	 16
535	  6	129.3	18.1	 16
536	  6	504.8	37.9	 16
537	  6	118.0	18.4	 16
538	  6	3012.3	383.9	 16
539	  6	676.8	95.7	 16
540	  6	62.0	14.2	 16
541	  6	122.3	14.4	 16
542	  6	230.3	39.1	 16
543	  6	51.5	8.8	 16
544	  6	147.5	15.9	 16
545	  6	211.5	30.6	 16
546	  6	212.5	23.5	 16
547	  6	219.5	20.6	 16
548	  6	193.0	18.3	 16
549	  6	187.5	21.3	 16
550	  6	108.3	21.5	 16
551	  6	99.8	16.7	 16
552	  6	55.3	12.0	 20
553	  6	56.5	11.2	 16
554	  6	54.3	8.7	 16
555	  6	69.3	14.5	 16
556	  6	82.8	15.6	 16
557	  6	66.5	14.6	 16
558	  6	84.8	14.8	 16
559	  6	100.3	14.5	 16
560	  6	226.3	23.2	 16
561	  6	66.3	7.3	 16
562	  6	2731.3	232.1	 16
563	  6	86.0	14.0	 16
564	  6	80.5	11.1	 16
565	  6	102.8	20.0	 16
566	  6	327.8	46.9	 16
567	  6	179.3	28.1	 16
568	  6	86.3	9.6	 16
569	  6	114.0	15.3	 16
570	  6	451.0	37.8	 16
571	  6	68.0	11.1	 16
572	  6	102.3	12.8	 16
573	  6	72.5	8.5	 16
574	  6	99.3	16.1	 16
575	  6	53.5	9.2	 16
576	  6	116.5	22.2	 16
577	  6	46.0	9.4	 16
578	  6	61.5	13.5	 16
579	  6	415.8	43.6	 16
580	  6	185.8	30.7	 16
581	  6	490.8	41.3	 16
582	  6	544.5	54.2	 16
583	  6	290.0	25.2	 16
584	  6	111.5	19.5	 16
585	  6	133.0	11.9	 16
586	  6	130.3	19.1	 16
587	  6	117.0	22.1	 16
588	  6	70.3	17.5	 16
589	  6	57.3	12.7	 16
590	  6	57.8	12.7	 16
591	  6	57.3	11.9	 16
592	  6	269.3	27.5	 16
593	  6	188.5	22.2	 16
594	  6	137.8	19.8	 16
595	  6	66.8	11.4	 16
596	  6	93.8	18.2	 16
597	  6	109.8	18.5	 16
598	  6	127.5	22.0	 16
599	  6	49.8	7.4	 16
600	  6	64.8	11.1	 16
601	  6	107.0	17.6	 16
602	  6	124.5	19.8	 16
603	  6	52.5	10.5	 16
604	  6	64.3	10.6	 16
605	  6	49.0	7.8	 16
606	  6	69.5	16.8	 16
607	  6	62.0	10.4	 16
608	  6	54.3	8.2	 16
609	  6	130.0	20.8	 16
610	  6	50.5	8.4	 16
611	  6	56.3	9.1	 16
612	  6	75.5	11.9	 16
613	  6	64.3	11.3	 16
614	  6	110.0	15.2	 16
615	  6	58.0	11.6	 16
616	  6	68.0	11.5	 16
617	  6	116.3	39.7	 16
618	  6	81.3	15.9	 16
619	  6	53.3	11.8	 16
620	  6	57.3	9.4	 16
621	  6	54.5	10.2	 16
622	  6	58.5	12.6	 16
623	  6	129.3	18.0	 16
624	  6	108.0	16.1	 16
625	  6	71.8	9.7	 16
626	  6	1116.3	95.4	 16
627	  6	124.5	23.9	 16
628	  6	69.0	11.6	 16
629	  6	119.5	17.3	 16
630	  6	50.5	10.1	 16
631	  6	56.3	11.4	 16
632	  6	94.8	17.7	 16
633	  6	71.5	8.3	 16
634	  6	108.3	19.3	 16
635	  6	69.8	12.7	 16
636	  6	67.5	11.1	 16
637	  6	389.3	44.2	 16
638	  6	734.0	99.9	 16
639	  6	69.8	12.4	 16
640	  6	76.3	15.0	 16
641	  6	55.3	10.7	 16
642	  6	54.5	9.4	 16
643	  6	61.0	9.9	 16
644	  6	142.8	29.6	 16
645	  6	120.0	17.2	 16
646	  6	67.8	13.7	 16
647	  6	56.3	8.3	 16
648	  6	224.8	49.7	 16
649	  6	77.0	10.9	 16
650	  6	82.5	11.0	 16
651	  6	327.3	44.3	 16
652	  6	151.0	21.1	 16
653	  6	82.5	13.5	 16
654	  6	131.5	20.3	 16
655	  6	190.3	25.7	 16
656	  6	236.3	28.6	 16
657	  6	1041.8	164.6	 16
658	  6	81.3	17.1	 16
659	  6	255.3	31.9	 16
660	  6	169.5	23.4	 16
661	  6	148.8	23.5	 16
662	  6	85.3	12.1	 16
663	  6	66.3	10.1	 16
664	  6	2127.3	511.2	 16
665	  6	133.5	21.4	 16
666	  6	236.0	43.1	 16
667	  6	71.0	15.7	 16
668	  6	160.3	37.1	 16
669	  6	104.3	20.3	 16
670	  6	78.0	11.2	 16
671	  6	89.5	16.5	 20
672	  6	146.5	25.5	 16
673	  6	66.5	6.2	 16
674	  6	121.0	22.3	 16
675	  6	61.8	10.4	 16
676	  6	72.0	11.2	 16
677	  6	62.5	8.4	 16
678	  6	71.0	14.3	 16
679	  6	527.3	76.6	 16
680	  6	55.0	8.7	 16
681	  6	195.3	21.9	 16
682	  6	86.5	17.2	 16
683	  6	78.3	12.5	 16
684	  6	69.8	8.2	 16
685	  6	54.8	9.0	 16
686	  6	62.0	10.3	 16
687	  6	74.3	14.4	 16
688	  6	1549.8	125.4	 16
689	  6	184.0	30.2	 16
690	  6	148.8	27.5	 16
691	  6	299.8	35.8	 16
692	  6	103.0	14.2	 16
693	  6	170.5	20.9	 16
694	  6	87.5	16.3	 16
695	  6	106.3	16.2	 16
696	  6	106.5	10.7	 16
697	  6	119.5	20.2	 16
698	  6	83.0	17.4	 16
699	  6	105.5	15.2	 16
700	  6	57.0	12.2	 16
701	  6	94.5	18.9	 16
702	  6	89.0	16.1	 16
703	  6	154.3	19.3	 16
704	  6	76.0	12.1	 16
705	  6	201.5	28.6	 16
706	  6	205.5	33.7	 16
707	  6	150.5	20.3	 16
708	  6	73.5	16.1	 16
709	  6	89.8	13.4	 16
710	  6	119.8	16.5	 16
711	  6	6015.5	335.3	 16
  0	  7	103.3	15.4	 16
  1	  7	223.5	22.2	 16
  2	  7	145.3	23.9	 16
  3	  7	279.0	38.9	 16
  4	  7	111.0	20.0	 16
  5	  7	296.3	36.8	 16
  6	  7	79.3	11.2	 16
  7	  7	178.0	31.3	 16
  8	  7	430.0	55.7	 16
  9	  7	452.3	54.9	 16
 10	  7	151.0	15.6	 16
 11	  7	62.0	11.6	 16
 12	  7	6767.5	423.9	 16
 13	  7	121.3	20.6	 16
 14	  7	118.5	17.1	 16
 15	  7	122.5	18.3	 16
 16	  7	141.5	41.9	 16
 17	  7	76.8	12.9	 16
 18	  7	127.8	21.4	 16
 19	  7	6720.5	313.3	 16
 20	  7	6405.8	186.8	 16
 21	  7	6221.8	328.3	 16
 22	  7	123.0	18.4	 16
 23	  7	78.5	11.1	 16
 24	  7	7074.3	471.0	 16
 25	  7	157.0	23.5	 16
 26	  7	6402.8	313.2	 16
 27	  7	6406.8	484.2	 16
 28	  7	117.3	13.0	 16
 29	  7	84.0	12.9	 16
 30	  7	117.3	22.5	 16
 31	  7	6706.8	593.9	 16
 32	  7	6544.5	622.2	 16
 33	  7	6355.5	831.7	 16
 34	  7	136.0	24.3	 16
 35	  7	93.8	13.3	 16
 36	  7	7329.3	550.8	 16
 37	  7	115.0	17.6	 16
 38	  7	109.3	21.0	 16
 39	  7	107.8	16.1	 16
 40	  7	115.0	19.9	 16
 41	  7	78.3	14.8	 16
 42	  7	7536.3	503.7	 16
 43	  7	131.0	15.2	 16
 44	  7	6645.8	362.6	 16
 45	  7	6184.3	479.1	 16
 46	  7	113.3	19.5	 16
 47	  7	73.0	15.9	 16
 48	  7	113.3	20.2	 16
 49	  7	131.3	16.8	 16
 50	  7	5229.8	390.7	 16
 51	  7	104.8	18.4	 16
 52	  7	107.0	23.5	 16
 53	  7	82.0	16.6	 16
 54	  7	6965.3	647.8	 16
 55	  7	6934.8	550.7	 16
 56	  7	6495.8	683.3	 16
 57	  7	116.0	16.5	 16
 58	  7	115.3	21.2	 16
 59	  7	64.3	12.6	 16
 60	  7	72.5	11.4	 16
 61	  7	74.8	16.3	 16
 62	  7	7808.5	445.2	 16
 63	  7	136.0	17.1	 16
 64	  7	146.0	105.9	 16
 65	  7	132.5	17.4	 16
 66	  7	6537.0	322.6	 16
 67	  7	99.0	11.0	 16
 68	  7	7476.0	361.2	 16
 69	  7	132.8	29.4	 16
 70	  7	98.5	11.7	 16
 71	  7	111.0	19.0	 16
 72	  7	114.0	16.9	 16
 73	  7	67.3	11.9	 16
 74	  7	94.3	13.4	 16
 75	  7	97.8	17.2	 16
 76	  7	111.0	13.8	 16
 77	  7	98.5	12.0	 16
 78	  7	101.3	13.8	 16
 79	  7	69.8	14.5	 16
 80	  7	6354.5	1236.6	 20
 81	  7	128.0	16.2	 16
 82	  7	110.0	17.5	 16
 83	  7	95.5	14.4	 16
 84	  7	5949.5	1208.3	 16
 85	  7	74.5	15.4	 16
 86	  7	92.3	15.0	 16
 87	  7	121.0	16.1	 16
 88	  7	6142.3	1006.7	 16
 89	  7	100.5	15.9	 16
 90	  7	98.5	15.5	 16
 91	  7	66.3	8.7	 16
 92	  7	85.5	17.3	 16
 93	  7	95.3	13.6	 16
 94	  7	109.3	17.2	 16
 95	  7	6002.5	923.5	 16
 96	  7	109.0	20.6	 16
 97	  7	68.3	10.1	 16
 98	  7	94.0	15.8	 16
 99	  7	91.0	11.4	 16
100	  7	116.0	17.5	 16
101	  7	5978.5	645.1	 16
102	  7	98.5	15.7	 16
103	  7	65.8	11.8	 16
104	  7	103.5	15.9	 16
105	  7	6136.0	519.9	 16
106	  7	113.0	17.9	 16
107	  7	6369.3	574.0	 16
108	  7	109.3	15.8	 16
109	  7	67.3	12.1	 16
110	  7	59.5	9.9	 16
111	  7	84.3	15.0	 16
112	  7	212.8	37.0	 16
113	  7	87.0	17.9	 16
114	  7	75.5	11.9	 16
115	  7	85.8	14.3	 16
116	  7	581.3	128.1	 16
117	  7	147.0	27.9	 16
118	  7	97.3	12.1	 16
119	  7	195.0	25.7	 16
120	  7	182.3	25.8	 16
121	  7	577.3	58.8	 16
122	  7	198.0	21.3	 16
123	  7	439.3	40.1	 16
124	  7	97.0	16.0	 16
125	  7	392.0	42.3	 16
126	  7	7147.5	398.9	 16
127	  7	7840.8	292.9	 16
128	  7	8197.5	636.0	 16
129	  7	212.5	20.8	 16
130	  7	86.8	11.6	 16
131	  7	2644.0	179.7	 16
132	  7	177.3	27.8	 16
133	  7	1418.8	137.4	 16
134	  7	533.5	57.6	 16
135	  7	320.0	33.2	 16
136	  7	350.8	34.6	 16
137	  7	113.5	22.4	 16
138	  7	110.5	17.2	 16
139	  7	189.3	22.8	 16
140	  7	64.0	12.0	 16
141	  7	63.0	9.3	 16
142	  7	82.3	12.3	 16
143	  7	380.3	68.4	 16
144	  7	154.3	25.1	 16
145	  7	758.8	82.0	 16
146	  7	70.3	16.1	 16
147	  7	90.0	13.9	 16
148	  7	89.3	11.4	 16
149	  7	88.3	12.7	 16
150	  7	75.5	10.2	 16
151	  7	92.0	15.2	 16
152	  7	307.8	38.9	 16
153	  7	226.0	39.5	 16
154	  7	136.8	22.0	 16
155	  7	72.5	12.5	 16
156	  7	718.8	60.8	 16
157	  7	728.5	43.9	 16
158	  7	158.8	24.4	 16
159	  7	194.3	18.0	 16
160	  7	113.3	11.3	 16
161	  7	166.0	25.3	 16
162	  7	90.5	13.9	 16
163	  7	93.8	16.4	 16
164	  7	139.5	20.3	 16
165	  7	178.8	30.6	 16
166	  7	67.5	13.9	 16
167	  7	177.3	32.4	 16
168	  7	82.3	13.5	 16
169	  7	212.3	39.0	 16
170	  7	268.8	44.1	 16
171	  7	392.5	57.3	 16
172	  7	66.0	11.7	 16
173	  7	88.0	13.3	 16
174	  7	1227.0	134.7	 16
175	  7	84.8	12.6	 16
176	  7	98.0	18.0	 16
177	  7	92.5	23.0	 16
178	  7	71.3	10.3	 16
179	  7	67.3	9.2	 16
180	  7	222.8	32.5	 16
181	  7	93.3	14.0	 16
182	  7	651.0	50.3	 16
183	  7	80.3	12.9	 16
184	  7	90.5	16.0	 16
185	  7	73.3	9.8	 16
186	  7	107.3	18.4	 16
187	  7	108.5	13.4	 16
188	  7	123.5	17.0	 16
189	  7	196.3	32.0	 16
190	  7	164.0	20.4	 16
191	  7	98.8	15.7	 16
192	  7	137.8	25.8	 16
193	  7	111.3	15.7	 16
194	  7	139.8	20.1	 16
195	  7	71.0	13.2	 16
196	  7	67.0	14.2	 16
197	  7	60.3	6.5	 16
198	  7	106.0	22.1	 16
199	  7	2528.8	433.5	 20
200	  7	308.0	32.2	 16
201	  7	96.8	13.3	 16
202	  7	102.3	9.2	 16
203	  7	174.8	26.3	 16
204	  7	230.3	27.1	 16
205	  7	59.3	12.3	 16
206	  7	158.8	19.3	 16
207	  7	69.3	14.4	 16
208	  7	128.3	17.3	 16
209	  7	73.8	14.9	 16
210	  7	69.3	13.7	 16
211	  7	89.3	13.3	 16
212	  7	158.5	26.4	 16
213	  7	325.5	52.3	 16
214	  7	366.8	43.6	 16
215	  7	202.3	31.0	 16
216	  7	121.5	19.5	 16
217	  7	255.5	32.8	 16
218	  7	157.5	31.7	 16
219	  7	50.8	12.1	 16
220	  7	158.5	27.3	 16
221	  7	160.8	19.9	 16
222	  7	813.3	158.0	 16
223	  7	78.3	10.0	 16
224	  7	57.0	10.3	 16
225	  7	116.3	19.3	 16
226	  7	210.5	28.2	 16
227	  7	107.3	19.2	 16
228	  7	139.8	20.2	 16
229	  7	58.3	7.1	 16
230	  7	62.8	10.5	 16
231	  7	786.5	117.4	 16
232	  7	139.3	20.2	 16
233	  7	97.0	16.8	 16
234	  7	50.3	13.2	 16
235	  7	93.3	18.5	 16
236	  7	277.5	37.3	 16
237	  7	48.8	10.5	 16
238	  7	53.3	8.3	 16
239	  7	649.8	64.5	 16
240	  7	63.3	12.4	 16
241	  7	109.0	14.7	 16
242	  7	224.0	25.1	 16
243	  7	383.3	71.4	 16
244	  7	1185.3	182.3	 16
245	  7	60.8	10.0	 16
246	  7	66.8	10.9	 16
247	  7	86.5	18.9	 16
248	  7	112.0	21.9	 16
249	  7	88.0	15.0	 16
250	  7	55.5	13.9	 16
251	  7	106.5	20.9	 16
252	  7	333.0	38.7	 16
253	  7	58.8	13.8	 16
254	  7	177.5	29.1	 16
255	  7	61.8	9.6	 16
256	  7	51.3	5.8	 16
257	  7	85.3	16.0	 16
258	  7	59.0	12.4	 16
259	  7	161.3	27.0	 16
260	  7	153.0	27.9	 16
261	  7	161.0	19.3	 16
262	  7	80.0	12.9	 16
263	  7	3582.0	423.8	 16
264	  7	94.5	14.6	 16
265	  7	68.8	12.4	 16
266	  7	65.5	11.2	 16
267	  7	778.8	120.6	 16
268	  7	697.8	109.2	 16
269	  7	68.0	11.8	 16
270	  7	54.3	9.5	 16
271	  7	134.0	22.3	 16
272	  7	450.5	70.4	 16
273	  7	159.8	30.6	 16
274	  7	120.8	19.4	 16
275	  7	86.8	10.3	 16
276	  7	156.5	31.4	 16
277	  7	101.8	21.7	 16
278	  7	365.0	54.6	 16
279	  7	65.3	10.2	 16
280	  7	77.3	13.5	 16
281	  7	75.0	7.9	 16
282	  7	2712.0	206.2	 16
283	  7	83.8	12.1	 16
284	  7	192.3	28.1	 16
285	  7	147.3	21.2	 16
286	  7	75.3	13.0	 16
287	  7	954.8	131.4	 16
288	  7	182.0	23.3	 16
289	  7	133.3	22.8	 16
290	  7	141.0	23.6	 16
291	  7	415.3	72.1	 16
292	  7	55.0	9.5	 16
293	  7	177.0	28.3	 16
294	  7	126.0	15.4	 16
295	  7	96.0	14.1	 16
296	  7	77.3	13.8	 16
297	  7	83.5	10.6	 16
298	  7	154.3	20.3	 16
299	  7	171.8	26.5	 16
300	  7	171.5	29.1	 16
301	  7	1091.3	199.8	 16
302	  7	66.3	14.1	 16
303	  7	166.0	24.9	 16
304	  7	101.8	15.3	 16
305	  7	57.3	12.7	 16
306	  7	1031.8	111.7	 16
307	  7	74.0	10.8	 16
308	  7	188.8	28.5	 16
309	  7	94.0	19.5	 16
310	  7	102.8	23.0	 16
311	  7	135.8	22.7	 16
312	  7	271.3	46.7	 16
313	  7	143.3	23.5	 16
314	  7	238.5	32.1	 16
315	  7	209.3	31.5	 16
316	  7	930.3	114.0	 16
317	  7	174.5	28.7	 20
318	  7	67.0	10.9	 16
319	  7	90.3	16.0	 16
320	  7	56.0	10.8	 16
321	  7	1006.3	199.8	 16
322	  7	126.8	29.4	 16
323	  7	103.0	15.4	 16
324	  7	202.8	29.1	 16
325	  7	310.0	39.4	 16
326	  7	1377.0	246.2	 16
327	  7	183.5	26.9	 16
328	  7	61.5	14.1	 16
329	  7	124.5	18.6	 16
330	  7	547.3	60.1	 16
331	  7	110.5	17.2	 16
332	  7	117.3	17.7	 16
333	  7	7335.8	275.1	 16
334	  7	7973.8	777.5	 16
335	  7	172.8	28.9	 16
336	  7	61.3	11.8	 16
337	  7	73.8	11.0	 16
338	  7	79.3	15.4	 16
339	  7	107.5	28.5	 16
340	  7	113.8	20.2	 16
341	  7	63.5	12.4	 16
342	  7	183.5	28.8	 16
343	  7	75.0	12.1	 16
344	  7	103.8	19.6	 16
345	  7	128.0	20.0	 16
346	  7	192.5	42.5	 16
347	  7	351.0	34.2	 16
348	  7	169.0	27.2	 16
349	  7	63.8	13.0	 16
350	  7	70.3	14.0	 16
351	  7	69.3	12.4	 16
352	  7	446.8	53.9	 16
353	  7	104.8	18.8	 16
354	  7	56.3	10.3	 16
355	  7	77.8	16.2	 16
356	  7	130.8	22.2	 16
357	  7	168.0	18.5	 16
358	  7	1806.8	101.4	 16
359	  7	189.5	20.8	 16
360	  7	346.8	27.3	 16
361	  7	70.5	9.6	 16
362	  7	108.5	16.3	 16
363	  7	75.0	14.5	 16
364	  7	60.8	11.8	 16
365	  7	68.5	11.1	 16
366	  7	154.5	12.0	 16
367	  7	206.3	29.0	 16
368	  7	81.5	16.5	 16
369	  7	107.8	13.9	 16
370	  7	260.0	29.8	 16
371	  7	264.3	32.2	 16
372	  7	296.3	27.3	 16
373	  7	129.5	23.0	 16
374	  7	319.3	57.1	 16
375	  7	52.5	10.7	 16
376	  7	106.3	18.7	 16
377	  7	77.5	13.2	 16
378	  7	126.3	20.2	 16
379	  7	758.3	124.5	 16
380	  7	415.0	54.0	 16
381	  7	194.3	32.1	 16
382	  7	163.8	20.8	 16
383	  7	1091.0	36.9	 16
384	  7	115.3	22.6	 16
385	  7	61.5	9.4	 16
386	  7	76.5	10.1	 16
387	  7	146.5	22.9	 16
388	  7	161.3	26.8	 16
389	  7	60.3	8.4	 16
390	  7	70.0	11.2	 16
391	  7	416.5	53.7	 16
392	  7	61.3	10.9	 16
393	  7	66.5	12.2	 16
394	  7	210.5	33.4	 16
395	  7	266.0	36.5	 16
396	  7	624.3	62.0	 16
397	  7	598.3	64.0	 16
398	  7	54.3	8.0	 16
399	  7	58.8	12.4	 16
400	  7	70.0	12.6	 16
401	  7	189.3	35.0	 16
402	  7	845.8	123.8	 16
403	  7	133.5	23.1	 16
404	  7	98.8	16.8	 16
405	  7	56.8	10.9	 16
406	  7	897.3	152.9	 16
407	  7	94.0	13.4	 16
408	  7	62.3	9.7	 16
409	  7	112.3	19.4	 16
410	  7	125.8	22.8	 16
411	  7	169.5	24.9	 16
412	  7	198.3	22.0	 16
413	  7	684.5	92.3	 16
414	  7	58.5	10.9	 16
415	  7	188.3	27.1	 16
416	  7	83.5	17.3	 16
417	  7	185.5	26.6	 16
418	  7	740.0	68.1	 16
419	  7	50.8	7.7	 16
420	  7	53.0	8.7	 16
421	  7	61.0	12.3	 16
422	  7	53.8	8.1	 16
423	  7	101.3	10.3	 16
424	  7	412.8	58.9	 16
425	  7	116.3	18.9	 16
426	  7	261.0	19.7	 16
427	  7	346.0	54.9	 16
428	  7	200.8	43.9	 16
429	  7	66.8	9.4	 16
430	  7	61.5	12.1	 16
431	  7	76.0	15.8	 16
432	  7	198.3	43.4	 16
433	  7	63.5	9.6	 16
434	  7	133.8	27.5	 16
435	  7	135.3	15.7	 16
436	  7	156.3	20.1	 20
437	  7	82.3	9.9	 16
438	  7	185.5	36.1	 16
439	  7	61.5	12.5	 16
440	  7	87.0	12.7	 16
441	  7	395.5	59.7	 16
442	  7	122.5	24.0	 16
443	  7	333.0	50.0	 16
444	  7	207.8	28.9	 16
445	  7	102.3	20.3	 16
446	  7	118.3	11.9	 16
447	  7	317.3	30.7	 16
448	  7	399.3	55.2	 16
449	  7	196.0	22.6	 16
450	  7	341.3	46.3	 16
451	  7	89.5	22.2	 16
452	  7	211.8	29.8	 16
453	  7	322.5	55.0	 16
454	  7	447.0	61.8	 16
455	  7	200.3	24.7	 16
456	  7	144.5	29.7	 16
457	  7	59.0	10.4	 16
458	  7	100.0	19.6	 16
459	  7	288.8	52.4	 16
460	  7	387.5	72.5	 16
461	  7	69.0	16.3	 16
462	  7	873.3	129.7	 16
463	  7	59.8	7.7	 16
464	  7	62.3	17.0	 16
465	  7	69.3	13.0	 16
466	  7	213.5	40.1	 16
467	  7	130.5	22.1	 16
468	  7	78.5	15.4	 16
469	  7	65.8	8.4	 16
470	  7	171.0	26.0	 16
471	  7	158.8	29.6	 16
472	  7	68.3	12.5	 16
473	  7	80.3	14.0	 16
474	  7	51.3	8.0	 16
475	  7	176.5	28.7	 16
476	  7	54.3	9.5	 16
477	  7	129.3	22.3	 16
478	  7	54.3	13.3	 16
479	  7	91.8	18.3	 16
480	  7	65.0	12.9	 16
481	  7	57.8	12.0	 16
482	  7	414.8	80.2	 16
483	  7	406.5	60.4	 16
484	  7	127.8	22.2	 16
485	  7	133.3	22.1	 16
486	  7	148.3	29.8	 16
487	  7	142.0	17.4	 16
488	  7	266.0	31.0	 16
489	  7	58.5	7.5	 16
490	  7	94.3	16.1	 16
491	  7	59.3	11.0	 16
492	  7	70.3	9.7	 16
493	  7	220.0	24.7	 16
494	  7	124.5	20.2	 16
495	  7	454.3	42.9	 16
496	  7	67.8	9.7	 16
497	  7	154.5	26.7	 16
498	  7	125.3	23.7	 16
499	  7	286.0	31.7	 16
500	  7	143.0	20.2	 16
501	  7	85.8	19.7	 16
502	  7	536.3	58.4	 16
503	  7	650.3	56.4	 16
504	  7	170.0	15.4	 16
505	  7	517.3	61.6	 16
506	  7	165.8	24.2	 16
507	  7	166.0	26.8	 16
508	  7	93.0	16.5	 16
509	  7	126.8	20.5	 16
510	  7	106.0	21.0	 16
511	  7	161.8	32.1	 16
512	  7	96.5	13.1	 16
513	  7	59.5	8.8	 16
514	  7	59.3	9.8	 16
515	  7	58.3	6.5	 16
516	  7	76.0	14.5	 16
517	  7	718.0	41.9	 16
518	  7	128.0	21.5	 16
519	  7	119.0	20.3	 16
520	  7	85.3	13.3	 16
521	  7	117.8	18.0	 16
522	  7	139.8	18.0	 16
523	  7	81.8	12.2	 16
524	  7	155.3	16.8	 16
525	  7	76.0	13.9	 16
526	  7	49.3	6.9	 16
527	  7	56.0	9.3	 16
528	  7	57.3	13.0	 16
529	  7	129.3	20.9	 16
530	  7	124.3	23.1	 16
531	  7	92.3	16.3	 16
532	  7	208.3	37.2	 16
533	  7	58.5	12.2	 16
534	  7	76.3	12.6	 16
535	  7	70.8	13.3	 16
536	  7	485.8	75.1	 16
537	  7	209.8	34.8	 16
538	  7	304.5	40.4	 16
539	  7	1861.0	358.1	 16
540	  7	279.5	40.6	 16
541	  7	90.5	16.5	 16
542	  7	86.8	15.0	 16
543	  7	55.3	9.0	 16
544	  7	67.0	10.0	 16
545	  7	75.0	14.9	 16
546	  7	251.5	31.4	 16
547	  7	285.8	47.8	 16
548	  7	239.3	32.8	 16
549	  7	237.3	28.6	 16
550	  7	52.8	11.8	 16
551	  7	108.0	21.5	 16
552	  7	144.0	23.8	 16
553	  7	61.0	10.2	 16
554	  7	212.3	36.8	 16
555	  7	65.5	10.4	 20
556	  7	62.3	15.5	 16
557	  7	106.5	22.8	 16
558	  7	184.5	25.3	 16
559	  7	491.5	66.6	 16
560	  7	52.3	10.0	 16
561	  7	90.3	13.7	 16
562	  7	247.5	39.2	 16
563	  7	483.8	59.8	 16
564	  7	92.8	14.9	 16
565	  7	253.5	30.3	 16
566	  7	54.5	8.7	 16
567	  7	50.3	9.9	 16
568	  7	245.5	29.9	 16
569	  7	111.0	19.0	 16
570	  7	67.8	8.2	 16
571	  7	71.0	7.2	 16
572	  7	83.8	15.4	 16
573	  7	91.5	14.0	 16
574	  7	109.5	20.1	 16
575	  7	444.0	33.6	 16
576	  7	74.5	9.4	 16
577	  7	603.0	57.6	 16
578	  7	79.0	15.8	 16
579	  7	108.3	16.7	 16
580	  7	220.0	27.7	 16
581	  7	154.0	20.3	 16
582	  7	434.5	54.5	 16
583	  7	61.8	11.0	 16
584	  7	177.3	31.2	 16
585	  7	254.8	36.7	 16
586	  7	60.0	14.8	 16
587	  7	83.3	17.2	 16
588	  7	101.3	18.2	 16
589	  7	134.5	27.8	 16
590	  7	127.8	25.3	 16
591	  7	65.3	13.2	 16
592	  7	2186.3	446.4	 16
593	  7	782.0	72.7	 16
594	  7	63.0	11.8	 16
595	  7	54.0	11.0	 16
596	  7	122.8	15.5	 16
597	  7	53.8	10.1	 16
598	  7	306.8	56.1	 16
599	  7	57.8	10.8	 16
600	  7	60.5	12.3	 16
601	  7	61.3	9.9	 16
602	  7	67.8	10.3	 16
603	  7	79.5	12.2	 16
604	  7	635.3	59.8	 16
605	  7	81.5	17.8	 16
606	  7	171.3	39.4	 16
607	  7	99.5	13.7	 16
608	  7	62.8	12.7	 16
609	  7	168.8	25.2	 16
610	  7	436.5	65.4	 16
611	  7	1465.8	253.0	 16
612	  7	113.5	17.4	 16
613	  7	123.5	17.8	 16
614	  7	95.5	16.3	 16
615	  7	102.8	21.5	 16
616	  7	69.3	11.1	 16
617	  7	187.0	29.4	 16
618	  7	59.3	10.8	 16
619	  7	160.3	18.6	 16
620	  7	244.5	30.5	 16
621	  7	497.0	67.3	 16
622	  7	122.0	20.1	 16
623	  7	143.0	23.4	 16
624	  7	54.3	14.1	 16
625	  7	668.5	89.3	 16
626	  7	91.8	16.0	 16
627	  7	358.3	57.7	 16
628	  7	248.3	25.2	 16
629	  7	76.5	12.2	 16
630	  7	233.5	37.3	 16
631	  7	361.8	58.1	 16
632	  7	213.0	29.1	 16
633	  7	218.3	31.6	 16
634	  7	107.3	18.7	 16
635	  7	199.5	43.9	 16
636	  7	213.3	36.5	 16
637	  7	864.0	160.8	 16
638	  7	61.3	13.7	 16
639	  7	287.0	74.0	 16
640	  7	54.0	9.5	 16
641	  7	114.0	22.5	 16
642	  7	332.5	67.6	 16
643	  7	71.8	13.4	 16
644	  7	279.0	46.5	 16
645	  7	84.8	17.6	 16
646	  7	165.5	21.0	 16
647	  7	307.8	46.8	 16
648	  7	278.5	43.2	 16
649	  7	1094.8	198.8	 16
650	  7	90.3	15.7	 16
651	  7	109.0	20.9	 16
652	  7	117.5	14.7	 16
653	  7	185.3	26.6	 16
654	  7	189.8	40.6	 16
655	  7	117.3	15.9	 16
656	  7	68.8	12.5	 16
657	  7	83.0	12.5	 16
658	  7	113.0	24.7	 16
659	  7	495.8	95.3	 16
660	  7	98.8	17.8	 16
661	  7	194.8	29.8	 16
662	  7	87.0	15.7	 16
663	  7	339.3	65.6	 16
664	  7	374.3	76.2	 16
665	  7	179.8	31.6	 16
666	  7	164.8	22.0	 16
667	  7	244.3	33.9	 16
668	  7	576.3	131.7	 16
669	  7	183.0	34.1	 16
670	  7	477.5	115.9	 16
671	  7	80.5	18.7	 16
672	  7	67.5	12.6	 16
673	  7	64.0	9.4	 20
674	  7	92.3	12.7	 16
675	  7	75.3	14.1	 16
676	  7	1472.8	179.6	 16
677	  7	72.5	14.4	 16
678	  7	572.5	39.5	 16
679	  7	262.8	26.4	 16
680	  7	186.8	27.4	 16
681	  7	204.8	27.1	 16
682	  7	100.5	14.9	 16
683	  7	202.3	21.4	 16
684	  7	133.0	14.6	 16
685	  7	158.8	14.8	 16
686	  7	204.0	27.7	 16
687	  7	3725.3	333.7	 16
688	  7	394.3	57.4	 16
689	  7	151.5	18.4	 16
690	  7	112.0	17.0	 16
691	  7	141.3	20.6	 16
692	  7	183.5	29.1	 16
693	  7	574.5	57.4	 16
694	  7	118.3	22.6	 16
695	  7	106.0	14.8	 16
696	  7	54.0	8.7	 16
697	  7	64.3	9.8	 16
698	  7	110.3	17.9	 16
699	  7	294.8	38.4	 16
700	  7	122.5	9.9	 16
701	  7	85.0	15.4	 16
702	  7	97.3	16.5	 16
703	  7	69.5	10.5	 16
704	  7	77.5	10.3	 16
705	  7	100.8	19.6	 16
706	  7	201.3	20.6	 16
707	  7	215.5	27.1	 16
708	  7	77.0	9.8	 16
709	  7	178.5	27.9	 16
710	  7	227.3	24.8	 16
711	  7	95.8	14.9	 16
  0	  8	7831.5	510.1	 16
  1	  8	127.8	18.9	 16
  2	  8	154.5	22.8	 16
  3	  8	209.8	23.2	 16
  4	  8	93.0	15.0	 16
  5	  8	80.3	13.7	 16
  6	  8	62.0	9.4	 16
  7	  8	75.8	14.4	 16
  8	  8	151.8	28.0	 16
  9	  8	507.5	54.8	 16
 10	  8	132.5	16.2	 16
 11	  8	69.3	11.4	 16
 12	  8	7047.0	503.4	 16
 13	  8	120.0	16.0	 16
 14	  8	109.5	14.3	 16
 15	  8	6242.8	734.1	 16
 16	  8	6595.5	173.6	 16
 17	  8	89.0	12.2	 16
 18	  8	7598.8	326.5	 16
 19	  8	124.8	17.6	 16
 20	  8	125.0	12.7	 16
 21	  8	130.5	17.5	 16
 22	  8	6767.8	387.2	 16
 23	  8	87.0	13.0	 16
 24	  8	7725.8	240.8	 16
 25	  8	7239.3	414.0	 16
 26	  8	122.5	22.9	 16
 27	  8	118.3	16.1	 16
 28	  8	6682.0	453.7	 16
 29	  8	81.8	11.0	 16
 30	  8	7404.5	626.8	 16
 31	  8	131.8	20.9	 16
 32	  8	128.0	15.5	 16
 33	  8	181.0	124.5	 16
 34	  8	6810.8	767.3	 16
 35	  8	85.5	10.2	 16
 36	  8	7340.8	536.6	 16
 37	  8	109.0	16.4	 16
 38	  8	105.3	17.1	 16
 39	  8	105.3	16.3	 16
 40	  8	109.5	17.5	 16
 41	  8	70.8	13.4	 16
 42	  8	7631.8	301.5	 16
 43	  8	7313.3	821.7	 16
 44	  8	112.5	18.3	 16
 45	  8	118.0	21.8	 16
 46	  8	6593.5	571.0	 16
 47	  8	83.0	15.4	 16
 48	  8	117.0	13.1	 16
 49	  8	138.0	19.6	 16
 50	  8	140.0	18.4	 16
 51	  8	121.3	23.1	 16
 52	  8	99.0	13.0	 16
 53	  8	95.5	18.8	 16
 54	  8	7091.8	388.8	 16
 55	  8	213.0	24.8	 16
 56	  8	198.3	24.3	 16
 57	  8	6449.8	749.0	 16
 58	  8	113.5	16.9	 16
 59	  8	63.0	10.7	 16
 60	  8	65.0	8.3	 16
 61	  8	68.8	9.1	 16
 62	  8	7870.3	356.3	 16
 63	  8	7228.5	1028.2	 16
 64	  8	6695.3	978.0	 16
 65	  8	6455.5	1060.2	 16
 66	  8	6815.5	289.6	 16
 67	  8	89.5	15.5	 16
 68	  8	7323.0	376.8	 16
 69	  8	130.0	23.2	 16
 70	  8	102.0	22.7	 16
 71	  8	5499.5	396.4	 16
 72	  8	6114.8	324.1	 16
 73	  8	89.0	17.1	 16
 74	  8	90.5	13.3	 16
 75	  8	5909.5	365.0	 16
 76	  8	5687.3	361.1	 16
 77	  8	5427.0	394.2	 16
 78	  8	105.0	12.0	 16
 79	  8	74.0	14.0	 16
 80	  8	6559.3	500.5	 16
 81	  8	125.3	22.2	 16
 82	  8	95.3	13.4	 16
 83	  8	105.3	14.6	 20
 84	  8	5750.3	1143.5	 16
 85	  8	71.5	11.8	 16
 86	  8	88.5	13.5	 16
 87	  8	103.8	13.7	 16
 88	  8	5861.8	1024.1	 16
 89	  8	110.5	18.0	 16
 90	  8	98.0	15.3	 16
 91	  8	62.0	9.5	 16
 92	  8	93.0	13.5	 16
 93	  8	5896.3	687.1	 16
 94	  8	5914.8	886.3	 16
 95	  8	99.5	11.6	 16
 96	  8	92.0	18.2	 16
 97	  8	59.0	10.6	 16
 98	  8	92.0	13.6	 16
 99	  8	5852.0	380.6	 16
100	  8	5821.5	706.5	 16
101	  8	101.0	16.3	 16
102	  8	97.0	13.7	 16
103	  8	71.0	14.5	 16
104	  8	96.5	11.1	 16
105	  8	6418.0	251.8	 16
106	  8	6350.0	450.1	 16
107	  8	6401.5	628.7	 16
108	  8	98.8	16.3	 16
109	  8	57.5	11.2	 16
110	  8	54.5	12.9	 16
111	  8	69.0	14.8	 16
112	  8	88.5	17.7	 16
113	  8	185.0	31.6	 16
114	  8	69.5	14.8	 16
115	  8	82.0	15.4	 16
116	  8	188.8	33.1	 16
117	  8	131.5	17.5	 16
118	  8	84.3	11.9	 16
119	  8	147.3	18.3	 16
120	  8	159.3	19.4	 16
121	  8	301.0	26.5	 16
122	  8	152.0	30.1	 16
123	  8	108.0	16.9	 16
124	  8	73.3	15.4	 16
125	  8	609.0	54.6	 16
126	  8	1326.5	148.8	 16
127	  8	1540.0	178.8	 16
128	  8	1541.5	200.5	 16
129	  8	93.5	12.6	 16
130	  8	72.5	15.1	 16
131	  8	597.3	55.1	 16
132	  8	76.8	17.1	 16
133	  8	230.8	36.7	 16
134	  8	2390.3	143.6	 16
135	  8	646.8	38.4	 16
136	  8	235.8	21.3	 16
137	  8	114.3	21.3	 16
138	  8	125.0	18.0	 16
139	  8	83.0	9.7	 16
140	  8	61.0	14.2	 16
141	  8	63.3	10.1	 16
142	  8	104.3	19.4	 16
143	  8	121.5	20.6	 16
144	  8	85.5	15.0	 16
145	  8	143.5	31.6	 16
146	  8	59.0	9.9	 16
147	  8	71.3	10.7	 16
148	  8	67.3	13.1	 16
149	  8	81.5	15.2	 16
150	  8	69.3	12.0	 16
151	  8	82.3	12.5	 16
152	  8	75.3	9.0	 16
153	  8	91.0	12.7	 16
154	  8	104.3	12.4	 16
155	  8	61.3	10.2	 16
156	  8	362.5	29.4	 16
157	  8	389.3	26.2	 16
158	  8	112.5	15.7	 16
159	  8	193.5	25.2	 16
160	  8	167.0	24.1	 16
161	  8	63.8	17.9	 16
162	  8	192.0	31.8	 16
163	  8	110.0	21.4	 16
164	  8	105.8	23.5	 16
165	  8	120.0	12.7	 16
166	  8	66.3	12.1	 16
167	  8	65.5	9.9	 16
168	  8	77.3	11.0	 16
169	  8	71.0	13.9	 16
170	  8	83.3	14.0	 16
171	  8	82.0	10.9	 16
172	  8	63.8	12.2	 16
173	  8	58.0	12.8	 16
174	  8	121.3	23.7	 16
175	  8	75.0	14.6	 16
176	  8	57.8	8.5	 16
177	  8	63.8	12.9	 16
178	  8	77.3	14.5	 16
179	  8	76.8	15.4	 16
180	  8	229.3	27.1	 16
181	  8	78.0	11.8	 16
182	  8	114.8	17.2	 16
183	  8	55.3	12.0	 16
184	  8	53.3	6.7	 16
185	  8	74.8	17.8	 16
186	  8	99.3	14.4	 16
187	  8	61.8	11.3	 16
188	  8	68.8	14.4	 16
189	  8	145.3	16.4	 16
190	  8	93.8	23.0	 16
191	  8	83.0	9.3	 16
192	  8	78.3	14.4	 16
193	  8	71.5	12.2	 16
194	  8	134.3	16.1	 16
195	  8	75.8	16.6	 16
196	  8	80.0	16.7	 16
197	  8	57.5	12.8	 16
198	  8	80.3	15.6	 16
199	  8	315.3	50.4	 16
200	  8	142.0	23.2	 16
201	  8	72.8	15.3	 16
202	  8	91.0	18.8	 20
203	  8	82.0	12.5	 16
204	  8	95.5	17.2	 16
205	  8	63.0	9.0	 16
206	  8	71.3	10.7	 16
207	  8	68.0	12.5	 16
208	  8	69.0	9.2	 16
209	  8	54.8	10.5	 16
210	  8	69.0	18.0	 16
211	  8	155.0	25.0	 16
212	  8	67.0	11.9	 16
213	  8	142.0	15.2	 16
214	  8	154.0	20.9	 16
215	  8	67.8	8.8	 16
216	  8	58.5	12.5	 16
217	  8	80.0	12.1	 16
218	  8	80.0	13.5	 16
219	  8	56.3	16.0	 16
220	  8	76.8	14.2	 16
221	  8	98.5	14.8	 16
222	  8	69.3	13.2	 16
223	  8	57.3	11.8	 16
224	  8	57.3	9.6	 16
225	  8	107.8	20.5	 16
226	  8	177.5	34.9	 16
227	  8	104.0	16.8	 16
228	  8	121.3	21.9	 16
229	  8	48.3	9.0	 16
230	  8	58.3	8.8	 16
231	  8	74.3	7.1	 16
232	  8	66.0	7.4	 16
233	  8	74.3	9.4	 16
234	  8	57.0	10.9	 16
235	  8	81.3	15.5	 16
236	  8	118.3	19.5	 16
237	  8	54.0	8.5	 16
238	  8	55.0	10.5	 16
239	  8	215.0	31.3	 16
240	  8	59.0	12.3	 16
241	  8	92.3	16.4	 16
242	  8	123.0	23.0	 16
243	  8	157.0	26.3	 16
244	  8	114.5	25.5	 16
245	  8	58.0	11.9	 16
246	  8	56.5	9.4	 16
247	  8	65.0	12.5	 16
248	  8	86.3	18.1	 16
249	  8	81.3	16.5	 16
250	  8	74.0	12.6	 16
251	  8	218.5	27.8	 16
252	  8	247.0	28.6	 16
253	  8	56.8	10.0	 16
254	  8	65.3	13.1	 16
255	  8	73.0	13.7	 16
256	  8	56.5	12.3	 16
257	  8	122.0	16.8	 16
258	  8	51.3	9.8	 16
259	  8	91.5	14.0	 16
260	  8	77.8	9.9	 16
261	  8	135.0	15.3	 16
262	  8	70.5	11.6	 16
263	  8	1250.8	102.2	 16
264	  8	72.0	5.4	 16
265	  8	81.3	16.3	 16
266	  8	67.0	12.8	 16
267	  8	187.5	26.8	 16
268	  8	250.8	33.8	 16
269	  8	57.8	7.9	 16
270	  8	73.3	11.4	 16
271	  8	197.5	26.7	 16
272	  8	200.3	26.5	 16
273	  8	56.0	12.0	 16
274	  8	76.0	14.1	 16
275	  8	76.3	15.4	 16
276	  8	219.0	33.5	 16
277	  8	110.5	14.8	 16
278	  8	101.5	15.9	 16
279	  8	67.5	10.4	 16
280	  8	59.5	10.1	 16
281	  8	68.8	9.7	 16
282	  8	625.8	58.7	 16
283	  8	102.3	16.8	 16
284	  8	63.3	14.1	 16
285	  8	58.3	10.0	 16
286	  8	74.0	15.0	 16
287	  8	113.5	16.8	 16
288	  8	79.0	12.7	 16
289	  8	209.5	25.3	 16
290	  8	148.5	16.4	 16
291	  8	97.3	19.3	 16
292	  8	62.8	10.4	 16
293	  8	151.5	20.2	 16
294	  8	92.3	15.6	 16
295	  8	108.3	12.6	 16
296	  8	96.3	15.8	 16
297	  8	90.8	12.8	 16
298	  8	171.0	32.6	 16
299	  8	115.0	12.6	 16
300	  8	213.5	23.2	 16
301	  8	204.5	27.3	 16
302	  8	58.0	11.8	 16
303	  8	80.3	13.7	 16
304	  8	69.3	14.8	 16
305	  8	53.3	7.4	 16
306	  8	320.3	38.9	 16
307	  8	70.3	11.4	 16
308	  8	90.5	20.6	 16
309	  8	89.3	17.6	 16
310	  8	96.0	15.6	 16
311	  8	151.3	25.8	 16
312	  8	110.5	19.3	 16
313	  8	222.0	26.0	 16
314	  8	259.0	34.5	 16
315	  8	133.3	23.5	 16
316	  8	239.8	33.0	 16
317	  8	88.8	18.8	 16
318	  8	72.8	12.9	 16
319	  8	60.5	12.2	 16
320	  8	53.0	7.3	 20
321	  8	181.8	20.9	 16
322	  8	80.0	17.2	 16
323	  8	75.5	13.0	 16
324	  8	153.5	35.5	 16
325	  8	183.3	26.4	 16
326	  8	733.8	111.7	 16
327	  8	118.3	23.9	 16
328	  8	62.5	10.5	 16
329	  8	134.0	20.8	 16
330	  8	641.8	100.6	 16
331	  8	95.3	12.1	 16
332	  8	80.0	13.2	 16
333	  8	2103.5	219.5	 16
334	  8	2340.5	337.2	 16
335	  8	106.8	26.0	 16
336	  8	77.5	13.1	 16
337	  8	57.0	12.8	 16
338	  8	61.3	13.8	 16
339	  8	58.3	9.4	 16
340	  8	110.5	18.1	 16
341	  8	63.5	11.9	 16
342	  8	91.3	13.7	 16
343	  8	58.3	13.2	 16
344	  8	77.3	13.6	 16
345	  8	85.3	14.2	 16
346	  8	152.5	24.3	 16
347	  8	547.3	41.4	 16
348	  8	140.8	15.4	 16
349	  8	74.0	13.6	 16
350	  8	87.8	20.2	 16
351	  8	52.0	6.7	 16
352	  8	174.3	25.7	 16
353	  8	64.5	8.3	 16
354	  8	60.3	7.6	 16
355	  8	123.0	18.8	 16
356	  8	101.3	15.6	 16
357	  8	144.8	19.8	 16
358	  8	963.3	94.5	 16
359	  8	126.0	22.8	 16
360	  8	108.8	16.6	 16
361	  8	71.0	21.0	 16
362	  8	55.5	12.1	 16
363	  8	67.3	12.2	 16
364	  8	58.3	9.2	 16
365	  8	58.8	16.1	 16
366	  8	126.5	18.1	 16
367	  8	118.5	17.7	 16
368	  8	86.0	13.4	 16
369	  8	114.5	16.1	 16
370	  8	117.5	17.8	 16
371	  8	111.5	13.1	 16
372	  8	160.5	23.3	 16
373	  8	133.5	20.5	 16
374	  8	58.5	13.4	 16
375	  8	50.5	8.0	 16
376	  8	56.3	8.0	 16
377	  8	73.0	11.0	 16
378	  8	173.0	23.8	 16
379	  8	156.8	25.2	 16
380	  8	147.3	24.5	 16
381	  8	83.3	15.4	 16
382	  8	68.0	11.8	 16
383	  8	510.0	46.0	 16
384	  8	113.5	19.4	 16
385	  8	64.5	13.9	 16
386	  8	66.0	11.4	 16
387	  8	163.3	25.3	 16
388	  8	145.3	18.5	 16
389	  8	54.5	11.1	 16
390	  8	72.3	12.5	 16
391	  8	55.0	8.5	 16
392	  8	67.5	12.7	 16
393	  8	63.0	13.1	 16
394	  8	141.0	15.3	 16
395	  8	177.5	28.4	 16
396	  8	273.5	40.5	 16
397	  8	296.3	35.3	 16
398	  8	55.3	8.0	 16
399	  8	68.3	12.8	 16
400	  8	73.5	10.8	 16
401	  8	363.0	29.5	 16
402	  8	102.5	16.8	 16
403	  8	67.3	10.1	 16
404	  8	68.3	12.0	 16
405	  8	54.5	8.0	 16
406	  8	146.5	41.9	 16
407	  8	55.0	8.6	 16
408	  8	65.5	13.9	 16
409	  8	97.5	22.8	 16
410	  8	78.5	12.1	 16
411	  8	205.5	29.5	 16
412	  8	123.0	16.1	 16
413	  8	132.5	21.0	 16
414	  8	52.5	11.1	 16
415	  8	152.0	39.0	 16
416	  8	48.3	10.3	 16
417	  8	58.3	11.3	 16
418	  8	124.0	22.5	 16
419	  8	51.0	8.9	 16
420	  8	50.8	9.7	 16
421	  8	56.3	11.9	 16
422	  8	56.0	8.8	 16
423	  8	96.0	20.6	 16
424	  8	332.8	51.1	 16
425	  8	107.0	16.9	 16
426	  8	399.5	33.2	 16
427	  8	88.0	13.6	 16
428	  8	68.5	9.8	 16
429	  8	60.3	7.7	 16
430	  8	75.0	11.4	 16
431	  8	68.8	12.9	 16
432	  8	73.8	13.4	 16
433	  8	50.3	10.4	 16
434	  8	96.0	12.8	 16
435	  8	86.3	15.3	 16
436	  8	77.5	14.8	 16
437	  8	110.3	17.4	 16
438	  8	160.8	21.9	 16
439	  8	65.5	10.6	 20
440	  8	82.3	14.7	 16
441	  8	79.5	11.4	 16
442	  8	62.3	7.5	 16
443	  8	116.8	18.9	 16
444	  8	83.8	19.8	 16
445	  8	70.3	12.6	 16
446	  8	89.0	10.4	 16
447	  8	120.0	20.4	 16
448	  8	287.0	46.5	 16
449	  8	1293.8	134.4	 16
450	  8	205.3	19.8	 16
451	  8	53.3	12.4	 16
452	  8	144.3	22.2	 16
453	  8	99.8	11.2	 16
454	  8	229.0	29.8	 16
455	  8	92.0	13.4	 16
456	  8	92.0	9.0	 16
457	  8	53.5	7.6	 16
458	  8	65.3	10.9	 16
459	  8	72.0	9.6	 16
460	  8	202.5	27.8	 16
461	  8	54.0	6.9	 16
462	  8	108.5	19.1	 16
463	  8	60.3	9.6	 16
464	  8	55.3	12.8	 16
465	  8	60.8	9.6	 16
466	  8	67.5	11.7	 16
467	  8	80.3	14.3	 16
468	  8	65.0	12.0	 16
469	  8	67.5	11.9	 16
470	  8	77.3	13.0	 16
471	  8	55.0	11.6	 16
472	  8	83.3	16.6	 16
473	  8	127.3	17.5	 16
474	  8	58.5	10.6	 16
475	  8	69.3	11.3	 16
476	  8	46.8	13.2	 16
477	  8	66.5	13.2	 16
478	  8	54.0	9.5	 16
479	  8	48.3	8.6	 16
480	  8	54.0	11.9	 16
481	  8	69.3	14.6	 16
482	  8	72.3	7.3	 16
483	  8	135.3	20.9	 16
484	  8	140.8	17.4	 16
485	  8	192.3	29.3	 16
486	  8	125.5	14.5	 16
487	  8	146.3	20.6	 16
488	  8	152.3	24.8	 16
489	  8	68.3	13.3	 16
490	  8	83.5	11.3	 16
491	  8	62.8	11.3	 16
492	  8	53.3	11.9	 16
493	  8	185.3	30.7	 16
494	  8	144.3	21.3	 16
495	  8	224.0	33.1	 16
496	  8	63.3	12.2	 16
497	  8	65.0	8.1	 16
498	  8	73.3	16.4	 16
499	  8	87.8	10.7	 16
500	  8	76.0	15.6	 16
501	  8	99.5	15.9	 16
502	  8	160.5	23.9	 16
503	  8	167.8	25.8	 16
504	  8	108.5	21.4	 16
505	  8	96.5	17.3	 16
506	  8	97.3	13.5	 16
507	  8	139.0	33.4	 16
508	  8	74.0	11.5	 16
509	  8	77.3	10.8	 16
510	  8	65.8	7.4	 16
511	  8	78.3	11.8	 16
512	  8	66.3	9.1	 16
513	  8	56.3	9.9	 16
514	  8	50.3	9.8	 16
515	  8	54.3	11.9	 16
516	  8	45.5	8.5	 16
517	  8	104.5	11.3	 16
518	  8	92.5	18.9	 16
519	  8	271.5	29.1	 16
520	  8	154.8	25.5	 16
521	  8	58.3	9.5	 16
522	  8	90.3	16.2	 16
523	  8	79.3	16.1	 16
524	  8	96.3	15.4	 16
525	  8	51.3	10.9	 16
526	  8	48.3	10.4	 16
527	  8	51.5	8.0	 16
528	  8	70.5	17.6	 16
529	  8	59.3	13.0	 16
530	  8	96.5	14.6	 16
531	  8	450.0	59.4	 16
532	  8	193.5	28.1	 16
533	  8	59.5	9.3	 16
534	  8	58.0	10.4	 16
535	  8	61.3	11.2	 16
536	  8	108.0	19.9	 16
537	  8	93.0	20.2	 16
538	  8	287.8	41.8	 16
539	  8	639.8	73.6	 16
540	  8	222.5	30.6	 16
541	  8	79.5	15.3	 16
542	  8	57.0	11.3	 16
543	  8	54.3	9.8	 16
544	  8	67.8	11.6	 16
545	  8	55.3	9.5	 16
546	  8	71.5	10.7	 16
547	  8	66.0	9.5	 16
548	  8	134.3	22.2	 16
549	  8	128.3	26.4	 16
550	  8	75.3	15.3	 16
551	  8	86.0	10.2	 16
552	  8	183.3	29.4	 16
553	  8	96.5	15.3	 16
554	  8	74.3	12.4	 16
555	  8	52.3	12.8	 16
556	  8	50.5	12.3	 16
557	  8	54.3	8.0	 16
558	  8	166.8	32.0	 20
559	  8	311.0	52.3	 16
560	  8	54.3	7.7	 16
561	  8	81.5	13.3	 16
562	  8	128.5	30.9	 16
563	  8	668.3	73.5	 16
564	  8	91.0	17.4	 16
565	  8	93.0	19.7	 16
566	  8	55.3	7.9	 16
567	  8	59.5	13.7	 16
568	  8	115.5	21.2	 16
569	  8	137.3	23.6	 16
570	  8	87.0	16.9	 16
571	  8	63.3	12.2	 16
572	  8	91.5	15.4	 16
573	  8	89.8	12.4	 16
574	  8	92.3	14.8	 16
575	  8	104.3	12.1	 16
576	  8	81.5	13.6	 16
577	  8	90.3	15.1	 16
578	  8	58.3	13.2	 16
579	  8	47.0	11.2	 16
580	  8	92.3	15.0	 16
581	  8	85.3	12.8	 16
582	  8	153.8	27.0	 16
583	  8	46.3	8.5	 16
584	  8	70.8	14.9	 16
585	  8	96.8	10.8	 16
586	  8	53.3	7.4	 16
587	  8	55.5	13.2	 16
588	  8	50.0	6.9	 16
589	  8	123.5	15.8	 16
590	  8	123.0	20.4	 16
591	  8	72.8	15.4	 16
592	  8	430.5	70.2	 16
593	  8	167.0	26.0	 16
594	  8	56.5	7.9	 16
595	  8	47.5	8.0	 16
596	  8	198.0	25.1	 16
597	  8	59.0	9.3	 16
598	  8	181.8	31.1	 16
599	  8	62.3	15.1	 16
600	  8	58.3	12.1	 16
601	  8	60.0	9.2	 16
602	  8	54.0	10.5	 16
603	  8	69.3	13.1	 16
604	  8	255.5	23.7	 16
605	  8	57.5	9.8	 16
606	  8	57.3	12.4	 16
607	  8	77.0	13.0	 16
608	  8	55.3	13.6	 16
609	  8	121.3	16.4	 16
610	  8	67.3	11.1	 16
611	  8	199.5	27.6	 16
612	  8	89.3	12.0	 16
613	  8	61.5	11.6	 16
614	  8	69.3	14.7	 16
615	  8	223.8	32.7	 16
616	  8	66.3	14.0	 16
617	  8	209.5	28.4	 16
618	  8	54.0	7.6	 16
619	  8	99.0	14.2	 16
620	  8	53.0	10.3	 16
621	  8	136.0	21.3	 16
622	  8	71.5	13.9	 16
623	  8	80.3	9.3	 16
624	  8	57.0	9.4	 16
625	  8	158.8	30.6	 16
626	  8	72.3	12.3	 16
627	  8	286.5	42.5	 16
628	  8	136.3	19.8	 16
629	  8	50.3	8.5	 16
630	  8	145.5	21.8	 16
631	  8	240.3	27.5	 16
632	  8	103.0	15.3	 16
633	  8	90.3	16.7	 16
634	  8	144.5	22.2	 16
635	  8	85.3	28.2	 16
636	  8	70.3	14.4	 16
637	  8	111.5	18.4	 16
638	  8	65.0	12.3	 16
639	  8	62.8	11.7	 16
640	  8	55.0	10.3	 16
641	  8	84.5	14.6	 16
642	  8	138.3	17.2	 16
643	  8	51.3	10.3	 16
644	  8	231.0	44.1	 16
645	  8	81.3	14.2	 16
646	  8	193.5	38.2	 16
647	  8	157.0	23.1	 16
648	  8	213.3	34.6	 16
649	  8	274.0	48.1	 16
650	  8	63.8	9.9	 16
651	  8	61.8	10.1	 16
652	  8	88.8	13.4	 16
653	  8	84.3	18.8	 16
654	  8	72.0	12.9	 16
655	  8	57.8	12.2	 16
656	  8	64.5	11.2	 16
657	  8	59.3	8.3	 16
658	  8	71.0	11.3	 16
659	  8	205.8	30.0	 16
660	  8	71.5	13.7	 16
661	  8	89.0	14.5	 16
662	  8	55.3	5.3	 16
663	  8	102.3	16.7	 16
664	  8	143.0	18.6	 16
665	  8	200.5	32.6	 16
666	  8	157.3	29.2	 16
667	  8	239.0	25.5	 16
668	  8	157.8	24.6	 16
669	  8	137.5	17.8	 16
670	  8	268.0	46.2	 16
671	  8	57.5	12.5	 16
672	  8	64.8	13.8	 16
673	  8	62.8	12.0	 16
674	  8	63.3	9.9	 16
675	  8	54.3	7.8	 16
676	  8	164.5	23.7	 20
677	  8	59.3	12.4	 16
678	  8	346.3	45.1	 16
679	  8	101.8	16.6	 16
680	  8	102.5	14.1	 16
681	  8	115.8	16.9	 16
682	  8	111.5	12.0	 16
683	  8	331.8	29.1	 16
684	  8	131.8	19.6	 16
685	  8	143.3	25.2	 16
686	  8	145.5	24.6	 16
687	  8	930.5	88.8	 16
688	  8	173.0	16.3	 16
689	  8	110.8	28.5	 16
690	  8	183.3	21.2	 16
691	  8	179.8	20.3	 16
692	  8	187.8	24.7	 16
693	  8	98.5	16.6	 16
694	  8	57.8	11.8	 16
695	  8	66.3	8.0	 16
696	  8	53.3	11.5	 16
697	  8	59.3	9.8	 16
698	  8	73.5	11.2	 16
699	  8	93.3	15.7	 16
700	  8	81.8	14.9	 16
701	  8	64.3	10.5	 16
702	  8	100.3	20.7	 16
703	  8	63.3	9.5	 16
704	  8	71.3	13.6	 16
705	  8	79.8	17.4	 16
706	  8	166.5	22.3	 16
707	  8	142.3	16.7	 16
708	  8	74.5	16.2	 16
709	  8	162.0	32.1	 16
710	  8	78.5	15.0	 16
711	  8	5649.0	459.2	 16
  0	  9	90.3	13.0	 16
  1	  9	250.5	35.2	 16
  2	  9	93.3	17.5	 16
  3	  9	91.8	20.1	 16
  4	  9	86.3	13.2	 16
  5	  9	56.5	15.1	 16
  6	  9	1212.5	197.9	 16
  7	  9	71.3	15.2	 16
  8	  9	95.8	25.2	 16
  9	  9	78.5	13.9	 16
 10	  9	317.0	50.6	 16
 11	  9	67.8	11.2	 16
 12	  9	6937.5	388.3	 16
 13	  9	113.0	17.2	 16
 14	  9	101.0	12.1	 16
 15	  9	101.5	15.7	 16
 16	  9	6964.3	380.9	 16
 17	  9	84.8	12.5	 16
 18	  9	7916.3	333.3	 16
 19	  9	7825.3	610.9	 16
 20	  9	7513.5	447.5	 16
 21	  9	7106.3	523.1	 16
 22	  9	125.5	25.9	 16
 23	  9	68.3	11.6	 16
 24	  9	7856.8	472.5	 16
 25	  9	139.3	19.0	 16
 26	  9	104.5	19.4	 16
 27	  9	105.0	15.9	 16
 28	  9	6965.5	441.6	 16
 29	  9	87.0	14.8	 16
 30	  9	8015.3	165.4	 16
 31	  9	7845.8	513.6	 16
 32	  9	7401.5	527.7	 16
 33	  9	7163.0	778.8	 16
 34	  9	123.3	23.6	 16
 35	  9	71.5	12.2	 16
 36	  9	7513.5	714.9	 16
 37	  9	115.3	15.9	 16
 38	  9	100.0	16.2	 16
 39	  9	103.3	16.1	 16
 40	  9	99.0	13.8	 16
 41	  9	72.3	10.5	 16
 42	  9	7385.5	525.9	 16
 43	  9	106.8	15.6	 16
 44	  9	111.0	14.9	 16
 45	  9	106.0	17.3	 16
 46	  9	6609.3	490.2	 16
 47	  9	74.0	12.6	 16
 48	  9	102.0	15.7	 16
 49	  9	121.8	27.9	 16
 50	  9	5571.3	493.3	 16
 51	  9	97.3	16.1	 16
 52	  9	97.3	13.3	 16
 53	  9	71.3	10.7	 16
 54	  9	7284.5	326.9	 16
 55	  9	7226.8	272.9	 16
 56	  9	6870.3	555.9	 16
 57	  9	113.5	25.6	 16
 58	  9	84.3	12.6	 16
 59	  9	59.0	11.6	 16
 60	  9	65.3	9.2	 16
 61	  9	59.8	9.6	 16
 62	  9	7874.3	393.8	 16
 63	  9	121.5	22.8	 16
 64	  9	116.5	22.6	 16
 65	  9	111.0	19.0	 16
 66	  9	6600.3	318.9	 16
 67	  9	80.3	9.9	 16
 68	  9	7423.8	347.2	 16
 69	  9	121.0	36.6	 16
 70	  9	86.3	9.2	 16
 71	  9	98.3	15.3	 16
 72	  9	6165.5	406.7	 16
 73	  9	67.3	20.0	 16
 74	  9	90.8	12.7	 16
 75	  9	92.5	14.4	 16
 76	  9	113.8	22.3	 16
 77	  9	91.0	16.4	 16
 78	  9	92.0	11.5	 16
 79	  9	76.3	26.9	 16
 80	  9	6551.8	459.5	 16
 81	  9	101.5	15.5	 16
 82	  9	87.8	11.6	 16
 83	  9	87.8	13.8	 16
 84	  9	5733.8	484.7	 16
 85	  9	83.0	15.0	 16
 86	  9	99.5	12.6	 20
 87	  9	95.0	14.5	 16
 88	  9	5746.3	1030.9	 16
 89	  9	108.5	19.9	 16
 90	  9	108.8	13.5	 16
 91	  9	61.3	9.1	 16
 92	  9	95.0	16.5	 16
 93	  9	92.5	12.9	 16
 94	  9	91.0	10.1	 16
 95	  9	5871.5	776.3	 16
 96	  9	88.5	12.4	 16
 97	  9	58.3	5.3	 16
 98	  9	89.5	14.7	 16
 99	  9	99.0	14.2	 16
100	  9	100.8	13.1	 16
101	  9	5878.0	702.4	 16
102	  9	104.5	11.5	 16
103	  9	64.0	13.1	 16
104	  9	6370.0	605.0	 16
105	  9	100.8	13.1	 16
106	  9	91.3	18.5	 16
107	  9	106.8	21.0	 16
108	  9	6107.5	748.2	 16
109	  9	65.3	13.6	 16
110	  9	60.3	12.4	 16
111	  9	384.8	54.4	 16
112	  9	1756.8	226.6	 16
113	  9	982.0	143.3	 16
114	  9	446.3	77.8	 16
115	  9	106.0	18.5	 16
116	  9	72.5	12.7	 16
117	  9	65.0	8.5	 16
118	  9	76.0	12.4	 16
119	  9	105.0	14.5	 16
120	  9	412.8	43.4	 16
121	  9	86.8	19.2	 16
122	  9	110.5	20.6	 16
123	  9	71.3	16.2	 16
124	  9	580.3	53.0	 16
125	  9	60.3	11.4	 16
126	  9	61.8	9.2	 16
127	  9	593.3	72.3	 16
128	  9	69.0	15.7	 16
129	  9	137.5	19.9	 16
130	  9	60.3	13.2	 16
131	  9	122.8	18.6	 16
132	  9	395.8	73.9	 16
133	  9	97.0	15.5	 16
134	  9	1010.8	158.6	 16
135	  9	60.0	15.1	 16
136	  9	76.3	11.1	 16
137	  9	70.5	13.5	 16
138	  9	60.5	15.3	 16
139	  9	67.0	10.5	 16
140	  9	76.3	12.7	 16
141	  9	328.8	74.3	 16
142	  9	139.0	28.1	 16
143	  9	778.3	135.4	 16
144	  9	95.0	13.2	 16
145	  9	122.3	18.3	 16
146	  9	105.5	14.4	 16
147	  9	69.8	12.4	 16
148	  9	102.3	14.8	 16
149	  9	69.5	9.1	 16
150	  9	389.3	35.7	 16
151	  9	81.5	11.9	 16
152	  9	7065.3	489.6	 16
153	  9	816.8	108.2	 16
154	  9	163.5	30.2	 16
155	  9	2110.3	155.5	 16
156	  9	498.8	65.2	 16
157	  9	952.5	102.8	 16
158	  9	114.3	22.6	 16
159	  9	300.0	28.7	 16
160	  9	632.3	36.3	 16
161	  9	64.3	12.6	 16
162	  9	68.0	10.8	 16
163	  9	80.8	13.4	 16
164	  9	149.3	25.0	 16
165	  9	365.0	42.7	 16
166	  9	127.5	14.2	 16
167	  9	99.8	18.9	 16
168	  9	129.0	26.3	 16
169	  9	546.8	108.6	 16
170	  9	3044.8	655.4	 16
171	  9	67.5	17.4	 16
172	  9	137.0	27.1	 16
173	  9	147.3	19.3	 16
174	  9	286.0	36.0	 16
175	  9	181.8	24.8	 16
176	  9	69.5	13.4	 16
177	  9	62.3	11.4	 16
178	  9	61.8	13.9	 16
179	  9	81.8	15.8	 16
180	  9	61.0	12.6	 16
181	  9	69.5	14.3	 16
182	  9	71.0	12.8	 16
183	  9	63.5	10.1	 16
184	  9	63.5	12.4	 16
185	  9	75.0	11.9	 16
186	  9	80.5	14.8	 16
187	  9	68.3	11.0	 16
188	  9	78.5	16.0	 16
189	  9	75.3	12.8	 16
190	  9	73.0	13.3	 16
191	  9	630.8	89.1	 16
192	  9	498.3	101.2	 16
193	  9	126.3	25.0	 16
194	  9	53.3	8.1	 16
195	  9	296.3	62.9	 16
196	  9	55.8	12.9	 16
197	  9	75.0	15.9	 16
198	  9	260.3	47.0	 16
199	  9	125.3	21.0	 16
200	  9	58.8	12.3	 16
201	  9	3213.3	449.8	 16
202	  9	68.3	10.2	 16
203	  9	60.3	11.4	 16
204	  9	81.0	12.6	 20
205	  9	344.5	25.9	 16
206	  9	587.5	79.3	 16
207	  9	123.3	18.8	 16
208	  9	121.8	27.4	 16
209	  9	57.3	8.4	 16
210	  9	237.3	27.5	 16
211	  9	96.8	14.3	 16
212	  9	498.0	63.5	 16
213	  9	366.0	40.8	 16
214	  9	159.3	24.1	 16
215	  9	65.3	13.6	 16
216	  9	108.5	15.6	 16
217	  9	68.3	14.3	 16
218	  9	89.5	17.3	 16
219	  9	60.5	12.7	 16
220	  9	241.8	26.8	 16
221	  9	106.5	13.1	 16
222	  9	107.5	14.4	 16
223	  9	163.0	29.2	 16
224	  9	110.0	18.5	 16
225	  9	115.0	21.5	 16
226	  9	64.5	9.9	 16
227	  9	145.8	22.2	 16
228	  9	49.0	10.3	 16
229	  9	369.5	47.2	 16
230	  9	94.0	13.3	 16
231	  9	1688.8	168.7	 16
232	  9	79.8	12.9	 16
233	  9	625.0	53.8	 16
234	  9	85.5	14.7	 16
235	  9	699.0	60.4	 16
236	  9	310.3	46.6	 16
237	  9	138.3	16.5	 16
238	  9	618.8	56.8	 16
239	  9	90.3	30.6	 16
240	  9	512.8	41.5	 16
241	  9	139.5	26.9	 16
242	  9	99.0	18.8	 16
243	  9	70.5	10.8	 16
244	  9	91.8	14.4	 16
245	  9	124.3	23.1	 16
246	  9	49.5	8.8	 16
247	  9	4649.3	824.9	 16
248	  9	213.8	41.5	 16
249	  9	299.8	42.0	 16
250	  9	244.8	47.3	 16
251	  9	172.0	24.5	 16
252	  9	627.5	60.6	 16
253	  9	286.8	30.5	 16
254	  9	236.3	31.7	 16
255	  9	49.0	7.3	 16
256	  9	145.0	27.8	 16
257	  9	78.0	13.8	 16
258	  9	1074.0	80.3	 16
259	  9	106.3	14.7	 16
260	  9	103.3	15.0	 16
261	  9	92.3	17.7	 16
262	  9	567.8	88.3	 16
263	  9	61.3	11.6	 16
264	  9	62.3	11.9	 16
265	  9	58.0	9.9	 16
266	  9	391.8	34.3	 16
267	  9	439.8	63.2	 16
268	  9	90.5	20.8	 16
269	  9	755.5	95.6	 16
270	  9	62.3	16.5	 16
271	  9	54.3	10.6	 16
272	  9	59.3	12.5	 16
273	  9	76.8	15.8	 16
274	  9	154.5	18.4	 16
275	  9	129.0	24.2	 16
276	  9	61.5	9.1	 16
277	  9	65.3	13.6	 16
278	  9	78.8	12.2	 16
279	  9	238.8	23.2	 16
280	  9	112.3	17.4	 16
281	  9	76.3	11.9	 16
282	  9	107.3	20.3	 16
283	  9	48.3	8.6	 16
284	  9	101.5	9.0	 16
285	  9	69.5	15.1	 16
286	  9	59.0	9.2	 16
287	  9	58.0	10.1	 16
288	  9	71.5	11.4	 16
289	  9	319.8	32.7	 16
290	  9	240.0	23.3	 16
291	  9	141.3	25.0	 16
292	  9	677.5	74.5	 16
293	  9	116.8	19.1	 16
294	  9	1481.3	211.0	 16
295	  9	416.8	43.8	 16
296	  9	110.8	18.0	 16
297	  9	355.0	65.1	 16
298	  9	73.3	11.8	 16
299	  9	241.3	37.3	 16
300	  9	291.5	61.2	 16
301	  9	92.3	15.3	 16
302	  9	82.8	17.8	 16
303	  9	69.3	12.3	 16
304	  9	111.5	17.0	 16
305	  9	812.3	77.5	 16
306	  9	150.0	18.8	 16
307	  9	110.0	19.6	 16
308	  9	455.0	45.7	 16
309	  9	183.8	24.8	 16
310	  9	610.8	65.8	 16
311	  9	661.5	57.9	 16
312	  9	81.8	13.8	 16
313	  9	475.5	84.8	 16
314	  9	303.0	46.0	 16
315	  9	107.0	19.7	 16
316	  9	206.5	27.6	 16
317	  9	363.3	43.2	 16
318	  9	66.3	8.3	 16
319	  9	59.3	15.7	 16
320	  9	413.3	65.4	 16
321	  9	239.3	43.9	 16
322	  9	315.5	51.2	 16
323	  9	60.3	12.0	 20
324	  9	61.0	10.5	 16
325	  9	93.8	16.6	 16
326	  9	61.0	11.0	 16
327	  9	70.8	13.0	 16
328	  9	450.5	91.8	 16
329	  9	143.8	27.6	 16
330	  9	132.0	29.4	 16
331	  9	74.5	17.2	 16
332	  9	526.3	48.9	 16
333	  9	499.0	56.5	 16
334	  9	106.3	15.5	 16
335	  9	57.5	10.1	 16
336	  9	70.5	14.7	 16
337	  9	64.5	11.7	 16
338	  9	61.8	8.4	 16
339	  9	195.5	28.5	 16
340	  9	71.3	11.6	 16
341	  9	100.0	18.9	 16
342	  9	167.8	23.7	 16
343	  9	276.5	50.5	 16
344	  9	1299.0	118.5	 16
345	  9	57.3	10.8	 16
346	  9	2067.5	272.7	 16
347	  9	127.5	21.4	 16
348	  9	1334.5	126.2	 16
349	  9	146.0	26.3	 16
350	  9	2005.8	277.2	 16
351	  9	126.8	23.7	 16
352	  9	207.3	33.9	 16
353	  9	249.0	43.9	 16
354	  9	167.8	26.3	 16
355	  9	469.5	73.2	 16
356	  9	845.8	71.0	 16
357	  9	189.0	29.5	 16
358	  9	205.5	26.7	 16
359	  9	136.0	19.5	 16
360	  9	105.0	17.9	 16
361	  9	286.3	40.9	 16
362	  9	94.3	14.7	 16
363	  9	535.8	80.4	 16
364	  9	60.8	12.6	 16
365	  9	81.3	13.5	 16
366	  9	44.3	9.7	 16
367	  9	67.0	13.2	 16
368	  9	68.5	9.5	 16
369	  9	169.0	29.5	 16
370	  9	106.3	16.5	 16
371	  9	225.0	28.4	 16
372	  9	143.3	19.1	 16
373	  9	57.3	12.6	 16
374	  9	116.0	14.0	 16
375	  9	105.8	14.4	 16
376	  9	297.8	45.7	 16
377	  9	1347.5	98.2	 16
378	  9	5932.5	849.0	 16
379	  9	129.3	13.9	 16
380	  9	57.0	10.9	 16
381	  9	129.8	24.8	 16
382	  9	198.5	27.3	 16
383	  9	138.0	23.9	 16
384	  9	590.8	62.1	 16
385	  9	625.3	65.3	 16
386	  9	165.3	29.0	 16
387	  9	534.0	46.6	 16
388	  9	398.3	30.3	 16
389	  9	59.3	7.4	 16
390	  9	57.0	7.4	 16
391	  9	156.0	36.0	 16
392	  9	114.5	10.6	 16
393	  9	62.5	11.1	 16
394	  9	3785.0	300.8	 16
395	  9	105.0	20.0	 16
396	  9	60.3	12.2	 16
397	  9	59.0	10.1	 16
398	  9	89.0	15.0	 16
399	  9	64.3	13.1	 16
400	  9	56.3	9.8	 16
401	  9	57.3	8.5	 16
402	  9	67.8	13.2	 16
403	  9	77.8	14.1	 16
404	  9	62.3	12.7	 16
405	  9	92.3	14.6	 16
406	  9	62.5	12.7	 16
407	  9	158.3	24.3	 16
408	  9	68.5	11.6	 16
409	  9	89.3	15.0	 16
410	  9	80.0	14.1	 16
411	  9	166.8	19.2	 16
412	  9	121.8	14.4	 16
413	  9	145.5	22.1	 16
414	  9	109.5	12.6	 16
415	  9	370.3	54.2	 16
416	  9	66.5	10.7	 16
417	  9	132.8	22.7	 16
418	  9	55.8	13.7	 16
419	  9	378.8	57.9	 16
420	  9	536.3	62.7	 16
421	  9	90.0	11.3	 16
422	  9	55.3	9.9	 16
423	  9	1285.5	165.8	 16
424	  9	311.0	29.9	 16
425	  9	52.8	16.0	 16
426	  9	54.8	13.1	 16
427	  9	783.8	129.9	 16
428	  9	133.8	24.0	 16
429	  9	53.0	8.4	 16
430	  9	96.3	19.9	 16
431	  9	59.3	8.0	 16
432	  9	57.0	9.7	 16
433	  9	982.8	186.8	 16
434	  9	85.0	53.3	 16
435	  9	48.3	9.0	 16
436	  9	56.8	11.1	 16
437	  9	63.3	14.6	 16
438	  9	2156.0	286.3	 16
439	  9	117.8	18.3	 16
440	  9	212.3	26.2	 16
441	  9	132.5	24.1	 16
442	  9	2037.3	346.3	 20
443	  9	271.8	38.2	 16
444	  9	633.0	104.3	 16
445	  9	66.5	14.2	 16
446	  9	183.0	37.4	 16
447	  9	92.0	17.3	 16
448	  9	66.8	11.0	 16
449	  9	56.5	15.7	 16
450	  9	90.3	14.4	 16
451	  9	466.3	76.8	 16
452	  9	58.3	10.6	 16
453	  9	179.5	24.0	 16
454	  9	1028.3	137.6	 16
455	  9	152.3	19.1	 16
456	  9	133.0	25.2	 16
457	  9	49.3	9.6	 16
458	  9	54.0	7.7	 16
459	  9	59.3	11.7	 16
460	  9	424.5	53.7	 16
461	  9	61.3	6.6	 16
462	  9	70.3	11.8	 16
463	  9	289.8	30.6	 16
464	  9	62.0	11.8	 16
465	  9	258.3	25.8	 16
466	  9	198.0	25.9	 16
467	  9	55.8	12.1	 16
468	  9	50.8	9.1	 16
469	  9	188.5	30.7	 16
470	  9	176.3	23.8	 16
471	  9	86.3	11.9	 16
472	  9	134.0	16.5	 16
473	  9	91.0	13.1	 16
474	  9	407.8	53.3	 16
475	  9	79.3	14.4	 16
476	  9	70.3	9.4	 16
477	  9	69.5	12.2	 16
478	  9	264.5	53.2	 16
479	  9	62.0	14.6	 16
480	  9	294.5	53.9	 16
481	  9	104.0	18.4	 16
482	  9	62.3	12.1	 16
483	  9	58.3	9.4	 16
484	  9	587.5	114.7	 16
485	  9	71.8	13.5	 16
486	  9	1874.5	442.3	 16
487	  9	127.5	30.1	 16
488	  9	303.5	54.6	 16
489	  9	51.3	8.3	 16
490	  9	98.3	14.4	 16
491	  9	64.3	11.6	 16
492	  9	305.0	31.4	 16
493	  9	319.8	36.7	 16
494	  9	375.3	30.4	 16
495	  9	234.3	20.4	 16
496	  9	160.8	13.9	 16
497	  9	508.0	42.7	 16
498	  9	166.5	20.4	 16
499	  9	194.8	22.6	 16
500	  9	90.5	12.1	 16
501	  9	81.8	14.9	 16
502	  9	86.3	12.2	 16
503	  9	88.3	13.4	 16
504	  9	122.0	19.5	 16
505	  9	1011.8	138.8	 16
506	  9	569.0	77.3	 16
507	  9	338.5	52.4	 16
508	  9	1261.3	246.6	 16
509	  9	60.0	12.1	 16
510	  9	607.8	86.2	 16
511	  9	120.5	20.1	 16
512	  9	58.0	13.0	 16
513	  9	195.8	44.4	 16
514	  9	561.5	56.1	 16
515	  9	58.0	13.1	 16
516	  9	159.5	21.5	 16
517	  9	58.3	11.5	 16
518	  9	62.0	14.3	 16
519	  9	300.5	31.7	 16
520	  9	156.0	21.2	 16
521	  9	61.0	11.4	 16
522	  9	67.5	8.8	 16
523	  9	65.0	13.1	 16
524	  9	55.3	10.7	 16
525	  9	97.3	14.4	 16
526	  9	115.5	15.0	 16
527	  9	82.8	12.0	 16
528	  9	56.0	9.1	 16
529	  9	76.3	12.5	 16
530	  9	269.0	41.4	 16
531	  9	83.3	16.5	 16
532	  9	53.5	10.5	 16
533	  9	53.0	7.3	 16
534	  9	67.3	12.3	 16
535	  9	64.3	11.1	 16
536	  9	73.0	11.5	 16
537	  9	131.3	21.7	 16
538	  9	64.3	12.9	 16
539	  9	84.8	16.0	 16
540	  9	407.8	62.8	 16
541	  9	110.8	18.0	 16
542	  9	53.0	8.3	 16
543	  9	102.3	22.7	 16
544	  9	65.5	13.5	 16
545	  9	701.5	83.7	 16
546	  9	144.5	20.2	 16
547	  9	138.5	20.8	 16
548	  9	137.0	17.9	 16
549	  9	130.5	20.5	 16
550	  9	149.0	34.4	 16
551	  9	219.3	31.9	 16
552	  9	118.0	24.4	 16
553	  9	229.0	31.2	 16
554	  9	102.3	15.1	 16
555	  9	62.0	10.8	 16
556	  9	84.0	12.6	 16
557	  9	75.0	12.7	 16
558	  9	85.3	12.5	 16
559	  9	85.8	15.7	 16
560	  9	73.0	14.0	 20
561	  9	282.8	42.7	 16
562	  9	58.3	8.9	 16
563	  9	89.8	11.6	 16
564	  9	421.5	73.5	 16
565	  9	409.0	72.3	 16
566	  9	1781.8	317.9	 16
567	  9	54.5	7.1	 16
568	  9	53.8	13.7	 16
569	  9	72.5	16.7	 16
570	  9	489.5	51.1	 16
571	  9	771.8	66.3	 16
572	  9	163.3	23.3	 16
573	  9	103.0	15.8	 16
574	  9	240.3	25.2	 16
575	  9	172.0	27.8	 16
576	  9	140.5	18.6	 16
577	  9	129.0	16.5	 16
578	  9	58.0	10.0	 16
579	  9	49.5	11.6	 16
580	  9	89.8	17.6	 16
581	  9	665.5	97.2	 16
582	  9	265.3	32.3	 16
583	  9	97.5	15.5	 16
584	  9	85.0	10.9	 16
585	  9	175.0	23.9	 16
586	  9	216.0	38.1	 16
587	  9	57.8	11.4	 16
588	  9	92.3	15.9	 16
589	  9	87.3	16.5	 16
590	  9	185.5	39.1	 16
591	  9	343.3	72.5	 16
592	  9	51.5	11.4	 16
593	  9	86.0	13.9	 16
594	  9	187.3	21.8	 16
595	  9	282.3	30.4	 16
596	  9	1234.3	130.5	 16
597	  9	1366.3	92.5	 16
598	  9	568.0	77.8	 16
599	  9	236.3	30.3	 16
600	  9	261.3	27.8	 16
601	  9	202.3	26.8	 16
602	  9	128.3	22.7	 16
603	  9	498.8	62.1	 16
604	  9	234.0	34.5	 16
605	  9	67.5	10.8	 16
606	  9	272.8	42.2	 16
607	  9	58.5	8.2	 16
608	  9	65.5	11.4	 16
609	  9	93.3	17.9	 16
610	  9	91.8	10.3	 16
611	  9	94.8	17.9	 16
612	  9	193.3	34.5	 16
613	  9	3825.8	552.4	 16
614	  9	60.8	10.8	 16
615	  9	121.3	23.2	 16
616	  9	132.0	30.7	 16
617	  9	485.3	74.9	 16
618	  9	123.5	16.9	 16
619	  9	75.3	19.2	 16
620	  9	210.0	29.4	 16
621	  9	120.8	19.5	 16
622	  9	86.0	11.7	 16
623	  9	302.5	44.2	 16
624	  9	458.3	72.3	 16
625	  9	99.0	15.6	 16
626	  9	58.3	8.8	 16
627	  9	209.3	37.5	 16
628	  9	75.5	12.3	 16
629	  9	60.3	9.3	 16
630	  9	156.8	19.8	 16
631	  9	162.8	20.3	 16
632	  9	1793.3	299.6	 16
633	  9	120.0	18.0	 16
634	  9	1438.3	223.1	 16
635	  9	2182.5	401.7	 16
636	  9	423.3	79.0	 16
637	  9	74.3	14.9	 16
638	  9	61.5	9.0	 16
639	  9	58.0	9.6	 16
640	  9	59.8	11.4	 16
641	  9	612.3	106.3	 16
642	  9	69.3	14.0	 16
643	  9	64.3	9.0	 16
644	  9	74.0	12.8	 16
645	  9	67.3	12.3	 16
646	  9	318.0	59.5	 16
647	  9	102.0	23.4	 16
648	  9	1611.3	287.6	 16
649	  9	57.3	9.1	 16
650	  9	65.5	11.5	 16
651	  9	65.3	15.2	 16
652	  9	208.5	32.5	 16
653	  9	623.8	110.7	 16
654	  9	151.3	20.5	 16
655	  9	281.3	37.9	 16
656	  9	78.0	22.7	 16
657	  9	269.5	42.0	 16
658	  9	157.3	34.4	 16
659	  9	345.8	74.3	 16
660	  9	106.8	16.3	 16
661	  9	92.8	18.1	 16
662	  9	57.8	6.9	 16
663	  9	407.0	86.3	 16
664	  9	172.5	32.3	 16
665	  9	87.3	22.1	 16
666	  9	143.8	30.4	 16
667	  9	207.5	24.4	 16
668	  9	379.8	51.2	 16
669	  9	194.8	38.3	 16
670	  9	102.3	18.1	 16
671	  9	660.8	149.5	 16
672	  9	189.3	37.0	 16
673	  9	114.3	19.6	 16
674	  9	184.3	34.1	 16
675	  9	72.5	11.9	 16
676	  9	99.3	20.3	 16
677	  9	251.3	42.1	 16
678	  9	135.3	31.5	 16
679	  9	158.3	31.7	 20
680	  9	550.5	70.2	 16
681	  9	5034.5	289.5	 16
682	  9	5674.0	352.4	 16
683	  9	6056.8	438.1	 16
684	  9	6083.0	642.5	 16
685	  9	286.8	36.2	 16
686	  9	227.8	19.5	 16
687	  9	59.5	9.7	 16
688	  9	58.3	13.3	 16
689	  9	73.5	12.9	 16
690	  9	65.3	11.0	 16
691	  9	216.8	31.9	 16
692	  9	70.3	15.0	 16
693	  9	315.5	44.3	 16
694	  9	104.0	16.8	 16
695	  9	74.0	14.9	 16
696	  9	90.3	18.1	 16
697	  9	380.5	47.0	 16
698	  9	1210.3	213.0	 16
699	  9	325.5	21.9	 16
700	  9	361.3	48.1	 16
701	  9	74.0	13.5	 16
702	  9	72.3	12.6	 16
703	  9	52.3	10.2	 16
704	  9	67.5	13.5	 16
705	  9	115.5	17.9	 16
706	  9	163.5	20.3	 16
707	  9	154.3	21.1	 16
708	  9	481.0	37.0	 16
709	  9	277.5	31.9	 16
710	  9	1079.8	89.2	 16
711	  9	98.8	17.3	 16
  0	 10	7815.5	781.1	 16
  1	 10	78.8	10.7	 16
  2	 10	89.8	16.9	 16
  3	 10	73.0	12.6	 16
  4	 10	58.5	8.3	 16
  5	 10	67.0	7.7	 16
  6	 10	133.8	20.4	 16
  7	 10	66.3	9.8	 16
  8	 10	54.5	7.9	 16
  9	 10	68.3	8.7	 16
 10	 10	145.8	21.9	 16
 11	 10	66.8	9.9	 16
 12	 10	7277.5	380.9	 16
 13	 10	111.3	18.8	 16
 14	 10	107.3	12.0	 16
 15	 10	111.3	20.2	 16
 16	 10	7035.8	802.1	 16
 17	 10	64.3	11.2	 16
 18	 10	7886.8	857.4	 16
 19	 10	119.3	19.0	 16
 20	 10	106.3	17.9	 16
 21	 10	108.0	17.6	 16
 22	 10	104.8	21.0	 16
 23	 10	66.5	14.9	 16
 24	 10	7575.3	432.1	 16
 25	 10	100.5	20.6	 16
 26	 10	96.5	12.8	 16
 27	 10	109.0	20.6	 16
 28	 10	6824.0	370.3	 16
 29	 10	72.5	8.9	 16
 30	 10	8086.5	536.2	 16
 31	 10	132.3	18.7	 16
 32	 10	113.8	24.6	 16
 33	 10	103.5	13.1	 16
 34	 10	90.0	14.8	 16
 35	 10	67.3	12.0	 16
 36	 10	7437.5	609.7	 16
 37	 10	109.8	27.2	 16
 38	 10	99.8	15.9	 16
 39	 10	99.8	12.6	 16
 40	 10	6212.3	796.0	 16
 41	 10	75.8	10.7	 16
 42	 10	7357.8	632.8	 16
 43	 10	93.0	11.6	 16
 44	 10	95.0	12.0	 16
 45	 10	103.3	18.3	 16
 46	 10	6541.0	487.8	 16
 47	 10	65.5	9.8	 16
 48	 10	85.3	15.9	 16
 49	 10	100.3	16.4	 16
 50	 10	6062.5	459.4	 16
 51	 10	96.8	10.4	 16
 52	 10	94.8	15.8	 16
 53	 10	67.8	14.4	 16
 54	 10	7330.8	566.0	 16
 55	 10	123.8	29.9	 16
 56	 10	104.3	16.5	 16
 57	 10	95.8	12.3	 16
 58	 10	89.8	10.6	 16
 59	 10	53.3	9.4	 16
 60	 10	56.5	6.4	 16
 61	 10	60.3	11.0	 16
 62	 10	7926.3	518.6	 16
 63	 10	108.0	15.1	 16
 64	 10	93.5	8.1	 16
 65	 10	102.8	19.6	 16
 66	 10	6565.3	402.6	 16
 67	 10	81.3	11.5	 16
 68	 10	7191.5	582.3	 16
 69	 10	131.3	22.4	 16
 70	 10	95.5	14.3	 16
 71	 10	96.0	17.9	 16
 72	 10	6242.8	344.7	 16
 73	 10	71.3	16.1	 16
 74	 10	87.5	15.4	 16
 75	 10	75.0	11.6	 16
 76	 10	74.3	13.9	 16
 77	 10	81.5	13.6	 16
 78	 10	91.5	12.8	 16
 79	 10	54.8	7.6	 16
 80	 10	6389.8	373.4	 16
 81	 10	121.0	24.3	 16
 82	 10	108.3	21.5	 16
 83	 10	114.8	20.1	 16
 84	 10	6081.5	551.4	 16
 85	 10	77.3	14.9	 16
 86	 10	91.8	17.4	 16
 87	 10	97.3	16.0	 16
 88	 10	5887.3	517.5	 16
 89	 10	109.3	24.4	 20
 90	 10	98.3	15.6	 16
 91	 10	63.0	10.6	 16
 92	 10	5858.3	964.3	 16
 93	 10	104.0	23.7	 16
 94	 10	106.8	12.2	 16
 95	 10	5900.5	788.3	 16
 96	 10	100.3	17.2	 16
 97	 10	60.0	8.3	 16
 98	 10	6115.5	789.8	 16
 99	 10	99.0	13.8	 16
100	 10	89.5	14.1	 16
101	 10	5752.8	575.1	 16
102	 10	93.5	15.0	 16
103	 10	63.8	11.7	 16
104	 10	6472.3	691.0	 16
105	 10	93.5	11.8	 16
106	 10	86.5	11.9	 16
107	 10	87.3	14.9	 16
108	 10	6050.8	578.6	 16
109	 10	65.3	11.9	 16
110	 10	46.3	9.9	 16
111	 10	141.0	21.0	 16
112	 10	427.8	52.7	 16
113	 10	347.3	42.8	 16
114	 10	251.5	16.3	 16
115	 10	84.5	12.0	 16
116	 10	62.3	14.3	 16
117	 10	66.5	10.0	 16
118	 10	83.3	15.3	 16
119	 10	97.5	14.6	 16
120	 10	102.8	17.0	 16
121	 10	83.0	11.3	 16
122	 10	61.3	10.5	 16
123	 10	74.0	15.5	 16
124	 10	130.3	16.8	 16
125	 10	58.3	11.4	 16
126	 10	55.0	9.0	 16
127	 10	63.8	9.8	 16
128	 10	53.0	9.2	 16
129	 10	58.0	9.5	 16
130	 10	73.3	12.4	 16
131	 10	105.3	16.6	 16
132	 10	119.8	12.8	 16
133	 10	70.3	17.0	 16
134	 10	75.0	13.0	 16
135	 10	55.3	9.3	 16
136	 10	61.3	12.3	 16
137	 10	63.3	11.9	 16
138	 10	57.3	8.7	 16
139	 10	67.5	12.6	 16
140	 10	59.0	10.0	 16
141	 10	81.0	17.0	 16
142	 10	81.3	12.4	 16
143	 10	335.5	40.2	 16
144	 10	204.0	21.8	 16
145	 10	72.3	13.3	 16
146	 10	60.8	11.2	 16
147	 10	59.0	11.8	 16
148	 10	68.0	6.9	 16
149	 10	64.0	11.6	 16
150	 10	83.8	14.1	 16
151	 10	57.0	9.3	 16
152	 10	1442.3	156.8	 16
153	 10	82.3	16.7	 16
154	 10	217.5	29.6	 16
155	 10	520.8	66.8	 16
156	 10	89.3	13.0	 16
157	 10	356.3	31.0	 16
158	 10	94.3	14.5	 16
159	 10	199.5	33.3	 16
160	 10	642.0	45.8	 16
161	 10	54.3	10.4	 16
162	 10	62.3	9.5	 16
163	 10	76.8	13.9	 16
164	 10	84.8	16.8	 16
165	 10	151.8	35.2	 16
166	 10	61.5	10.9	 16
167	 10	82.5	10.5	 16
168	 10	122.5	21.2	 16
169	 10	473.3	46.7	 16
170	 10	765.5	118.9	 16
171	 10	72.3	40.2	 16
172	 10	97.3	15.9	 16
173	 10	66.8	14.5	 16
174	 10	76.8	11.7	 16
175	 10	124.5	18.2	 16
176	 10	80.0	14.2	 16
177	 10	59.8	11.5	 16
178	 10	57.3	8.4	 16
179	 10	54.3	8.4	 16
180	 10	51.0	8.9	 16
181	 10	65.3	11.0	 16
182	 10	84.3	18.1	 16
183	 10	68.8	9.8	 16
184	 10	70.8	12.7	 16
185	 10	72.3	12.3	 16
186	 10	69.5	13.2	 16
187	 10	81.5	16.9	 16
188	 10	79.0	13.4	 16
189	 10	64.3	10.5	 16
190	 10	74.5	10.6	 16
191	 10	265.8	37.2	 16
192	 10	149.8	19.0	 16
193	 10	60.0	7.0	 16
194	 10	58.0	10.3	 16
195	 10	83.8	21.2	 16
196	 10	60.3	8.1	 16
197	 10	60.0	12.1	 16
198	 10	96.0	51.4	 16
199	 10	122.0	24.8	 16
200	 10	55.0	13.1	 16
201	 10	862.0	163.8	 16
202	 10	51.3	11.6	 16
203	 10	66.0	21.1	 16
204	 10	66.3	18.5	 16
205	 10	90.5	17.7	 16
206	 10	215.3	39.8	 16
207	 10	61.0	12.0	 20
208	 10	108.8	20.0	 16
209	 10	56.3	9.7	 16
210	 10	150.0	20.0	 16
211	 10	87.8	17.2	 16
212	 10	318.3	40.7	 16
213	 10	210.0	29.0	 16
214	 10	133.0	19.5	 16
215	 10	73.3	14.7	 16
216	 10	62.8	11.7	 16
217	 10	80.0	13.1	 16
218	 10	63.3	11.1	 16
219	 10	54.0	10.1	 16
220	 10	153.5	25.3	 16
221	 10	126.3	18.8	 16
222	 10	75.3	11.1	 16
223	 10	107.5	23.8	 16
224	 10	123.3	14.4	 16
225	 10	73.3	15.0	 16
226	 10	61.5	12.6	 16
227	 10	59.0	11.1	 16
228	 10	57.8	11.0	 16
229	 10	110.5	20.0	 16
230	 10	73.3	11.7	 16
231	 10	120.8	20.1	 16
232	 10	95.5	18.2	 16
233	 10	124.0	14.3	 16
234	 10	63.8	9.9	 16
235	 10	145.3	18.6	 16
236	 10	76.3	13.8	 16
237	 10	65.5	11.9	 16
238	 10	79.0	19.6	 16
239	 10	107.3	16.6	 16
240	 10	135.5	18.6	 16
241	 10	100.3	14.2	 16
242	 10	70.0	11.5	 16
243	 10	59.8	10.6	 16
244	 10	69.8	9.6	 16
245	 10	172.3	20.0	 16
246	 10	52.5	8.3	 16
247	 10	461.8	52.8	 16
248	 10	81.8	15.0	 16
249	 10	67.0	13.3	 16
250	 10	78.3	16.2	 16
251	 10	100.0	17.2	 16
252	 10	101.0	19.3	 16
253	 10	228.5	32.5	 16
254	 10	84.5	20.4	 16
255	 10	57.3	8.0	 16
256	 10	107.3	19.2	 16
257	 10	83.8	16.8	 16
258	 10	193.3	21.8	 16
259	 10	63.0	10.6	 16
260	 10	92.3	16.1	 16
261	 10	97.0	15.6	 16
262	 10	72.3	10.5	 16
263	 10	50.0	5.0	 16
264	 10	59.3	11.2	 16
265	 10	57.0	9.3	 16
266	 10	164.0	24.3	 16
267	 10	173.3	27.7	 16
268	 10	96.0	19.0	 16
269	 10	269.3	29.8	 16
270	 10	59.3	13.9	 16
271	 10	53.3	9.3	 16
272	 10	60.5	12.8	 16
273	 10	56.5	9.9	 16
274	 10	68.0	13.5	 16
275	 10	56.3	11.0	 16
276	 10	51.3	6.5	 16
277	 10	65.8	16.0	 16
278	 10	68.3	10.6	 16
279	 10	94.8	15.5	 16
280	 10	66.0	10.3	 16
281	 10	61.5	8.8	 16
282	 10	110.8	19.7	 16
283	 10	48.8	9.9	 16
284	 10	54.3	10.9	 16
285	 10	56.3	11.6	 16
286	 10	58.0	10.4	 16
287	 10	63.5	9.4	 16
288	 10	64.3	13.2	 16
289	 10	86.0	11.2	 16
290	 10	128.0	20.4	 16
291	 10	122.3	24.0	 16
292	 10	186.8	21.7	 16
293	 10	85.0	12.5	 16
294	 10	1843.8	122.5	 16
295	 10	546.3	59.1	 16
296	 10	86.5	14.4	 16
297	 10	506.0	40.5	 16
298	 10	128.5	17.1	 16
299	 10	98.3	23.1	 16
300	 10	76.8	12.8	 16
301	 10	75.5	12.8	 16
302	 10	67.5	12.7	 16
303	 10	69.0	8.6	 16
304	 10	136.3	22.6	 16
305	 10	396.5	39.4	 16
306	 10	57.5	12.7	 16
307	 10	94.0	14.4	 16
308	 10	118.0	17.9	 16
309	 10	101.0	18.0	 16
310	 10	196.5	25.9	 16
311	 10	111.5	16.0	 16
312	 10	59.0	12.9	 16
313	 10	88.8	21.6	 16
314	 10	73.0	9.6	 16
315	 10	60.3	10.4	 16
316	 10	132.5	19.3	 16
317	 10	1118.0	86.9	 16
318	 10	48.8	11.2	 16
319	 10	59.0	10.2	 16
320	 10	118.0	18.2	 16
321	 10	104.3	19.8	 16
322	 10	285.3	39.8	 16
323	 10	50.8	8.6	 16
324	 10	114.3	16.6	 16
325	 10	74.0	11.5	 16
326	 10	59.8	12.0	 20
327	 10	62.8	13.1	 16
328	 10	166.0	21.8	 16
329	 10	104.3	21.5	 16
330	 10	84.0	19.9	 16
331	 10	69.0	13.3	 16
332	 10	340.8	39.2	 16
333	 10	283.8	30.9	 16
334	 10	90.5	16.3	 16
335	 10	53.0	8.8	 16
336	 10	57.8	11.6	 16
337	 10	60.0	11.9	 16
338	 10	64.3	12.8	 16
339	 10	115.3	12.9	 16
340	 10	108.3	15.6	 16
341	 10	45.3	7.8	 16
342	 10	113.0	18.6	 16
343	 10	75.3	13.8	 16
344	 10	286.3	29.6	 16
345	 10	60.0	10.8	 16
346	 10	330.3	37.7	 16
347	 10	93.0	15.3	 16
348	 10	926.3	101.5	 16
349	 10	110.3	19.0	 16
350	 10	430.3	60.9	 16
351	 10	100.3	12.2	 16
352	 10	126.0	20.9	 16
353	 10	84.3	12.6	 16
354	 10	71.0	11.6	 16
355	 10	175.3	20.3	 16
356	 10	170.0	33.5	 16
357	 10	79.8	13.0	 16
358	 10	78.8	17.6	 16
359	 10	98.3	14.5	 16
360	 10	55.5	9.3	 16
361	 10	134.0	25.1	 16
362	 10	47.3	6.5	 16
363	 10	110.8	19.8	 16
364	 10	52.3	9.6	 16
365	 10	58.0	8.3	 16
366	 10	48.0	10.1	 16
367	 10	52.5	10.6	 16
368	 10	50.3	9.3	 16
369	 10	84.5	19.8	 16
370	 10	95.0	14.5	 16
371	 10	84.5	12.9	 16
372	 10	59.5	10.9	 16
373	 10	53.0	8.3	 16
374	 10	62.5	12.3	 16
375	 10	76.5	12.2	 16
376	 10	100.5	15.3	 16
377	 10	430.8	53.5	 16
378	 10	1116.5	112.9	 16
379	 10	94.0	16.5	 16
380	 10	60.3	9.1	 16
381	 10	66.5	9.0	 16
382	 10	71.8	9.3	 16
383	 10	138.0	25.6	 16
384	 10	143.8	25.7	 16
385	 10	150.8	29.9	 16
386	 10	209.8	31.1	 16
387	 10	132.5	21.1	 16
388	 10	65.5	10.0	 16
389	 10	59.5	9.3	 16
390	 10	56.3	9.5	 16
391	 10	86.3	14.3	 16
392	 10	69.3	11.4	 16
393	 10	57.0	13.7	 16
394	 10	923.0	66.7	 16
395	 10	165.0	20.9	 16
396	 10	60.0	12.1	 16
397	 10	54.3	13.7	 16
398	 10	82.0	31.5	 16
399	 10	55.0	8.9	 16
400	 10	51.8	7.6	 16
401	 10	82.0	16.5	 16
402	 10	70.8	15.1	 16
403	 10	58.0	8.7	 16
404	 10	74.3	15.7	 16
405	 10	100.5	14.0	 16
406	 10	55.3	6.9	 16
407	 10	56.0	8.6	 16
408	 10	52.3	7.4	 16
409	 10	96.5	14.8	 16
410	 10	60.0	11.7	 16
411	 10	313.8	46.1	 16
412	 10	83.0	20.0	 16
413	 10	87.5	12.3	 16
414	 10	145.5	18.5	 16
415	 10	77.0	12.1	 16
416	 10	85.8	12.6	 16
417	 10	57.8	13.0	 16
418	 10	55.3	8.6	 16
419	 10	91.0	17.4	 16
420	 10	190.0	24.5	 16
421	 10	61.0	10.0	 16
422	 10	60.3	13.1	 16
423	 10	145.3	25.8	 16
424	 10	85.3	17.0	 16
425	 10	52.8	9.0	 16
426	 10	58.3	8.8	 16
427	 10	103.5	18.7	 16
428	 10	72.0	13.8	 16
429	 10	55.0	11.2	 16
430	 10	58.3	7.9	 16
431	 10	61.3	12.7	 16
432	 10	58.5	17.7	 16
433	 10	81.5	15.9	 16
434	 10	55.3	10.3	 16
435	 10	45.3	9.9	 16
436	 10	55.0	9.7	 16
437	 10	58.0	10.2	 16
438	 10	949.8	137.0	 16
439	 10	82.0	17.9	 16
440	 10	92.5	12.2	 16
441	 10	73.5	13.4	 16
442	 10	420.0	42.0	 16
443	 10	130.0	21.3	 16
444	 10	62.3	10.4	 16
445	 10	66.3	11.0	 20
446	 10	65.8	14.7	 16
447	 10	49.0	7.0	 16
448	 10	46.5	8.2	 16
449	 10	53.3	7.8	 16
450	 10	106.8	22.6	 16
451	 10	130.8	24.3	 16
452	 10	92.8	19.5	 16
453	 10	150.8	20.2	 16
454	 10	592.3	63.5	 16
455	 10	110.8	16.2	 16
456	 10	81.3	15.9	 16
457	 10	52.0	9.3	 16
458	 10	61.5	11.5	 16
459	 10	57.3	14.0	 16
460	 10	303.0	48.6	 16
461	 10	62.8	14.2	 16
462	 10	64.3	11.3	 16
463	 10	83.0	13.9	 16
464	 10	51.0	13.9	 16
465	 10	65.5	9.3	 16
466	 10	275.3	31.5	 16
467	 10	55.3	10.3	 16
468	 10	54.3	14.8	 16
469	 10	63.0	16.2	 16
470	 10	57.0	9.2	 16
471	 10	57.3	6.9	 16
472	 10	126.3	18.5	 16
473	 10	66.8	14.4	 16
474	 10	98.3	12.4	 16
475	 10	60.5	13.2	 16
476	 10	52.0	9.6	 16
477	 10	51.3	10.6	 16
478	 10	71.3	11.6	 16
479	 10	54.5	11.6	 16
480	 10	87.3	14.6	 16
481	 10	58.3	8.0	 16
482	 10	56.5	8.7	 16
483	 10	51.5	12.2	 16
484	 10	193.3	25.8	 16
485	 10	64.0	11.2	 16
486	 10	251.3	60.2	 16
487	 10	60.3	13.0	 16
488	 10	74.8	15.2	 16
489	 10	56.3	10.7	 16
490	 10	59.3	9.0	 16
491	 10	50.3	9.0	 16
492	 10	71.3	11.0	 16
493	 10	230.0	38.1	 16
494	 10	448.0	35.8	 16
495	 10	247.8	32.9	 16
496	 10	243.0	33.5	 16
497	 10	424.0	39.4	 16
498	 10	192.8	27.6	 16
499	 10	197.3	14.7	 16
500	 10	60.3	12.2	 16
501	 10	57.8	8.8	 16
502	 10	64.0	13.9	 16
503	 10	83.5	13.3	 16
504	 10	83.3	8.4	 16
505	 10	105.0	29.5	 16
506	 10	869.5	69.9	 16
507	 10	70.5	14.5	 16
508	 10	330.3	41.1	 16
509	 10	51.5	11.8	 16
510	 10	110.0	20.6	 16
511	 10	79.3	11.7	 16
512	 10	57.5	9.4	 16
513	 10	60.8	9.0	 16
514	 10	103.0	11.2	 16
515	 10	56.3	15.0	 16
516	 10	51.3	4.9	 16
517	 10	56.8	10.5	 16
518	 10	56.3	9.3	 16
519	 10	79.8	17.0	 16
520	 10	70.0	6.4	 16
521	 10	60.3	13.1	 16
522	 10	80.5	16.3	 16
523	 10	52.3	10.7	 16
524	 10	52.3	12.0	 16
525	 10	86.3	17.6	 16
526	 10	75.0	12.8	 16
527	 10	73.0	7.5	 16
528	 10	62.3	7.4	 16
529	 10	57.0	9.7	 16
530	 10	183.3	27.4	 16
531	 10	58.5	13.8	 16
532	 10	51.0	8.3	 16
533	 10	59.3	10.7	 16
534	 10	46.3	11.7	 16
535	 10	67.5	11.2	 16
536	 10	66.0	11.6	 16
537	 10	77.5	18.1	 16
538	 10	58.0	10.8	 16
539	 10	52.0	8.6	 16
540	 10	92.8	19.5	 16
541	 10	72.3	8.6	 16
542	 10	56.3	9.6	 16
543	 10	68.8	15.4	 16
544	 10	56.0	10.1	 16
545	 10	85.5	11.2	 16
546	 10	153.5	24.0	 16
547	 10	251.5	24.7	 16
548	 10	72.8	11.8	 16
549	 10	92.0	16.2	 16
550	 10	95.3	16.0	 16
551	 10	324.5	37.9	 16
552	 10	191.0	24.7	 16
553	 10	168.8	24.5	 16
554	 10	73.3	14.1	 16
555	 10	49.0	7.7	 16
556	 10	63.0	10.1	 16
557	 10	68.5	11.7	 16
558	 10	55.3	7.0	 16
559	 10	83.0	16.4	 16
560	 10	53.3	9.5	 16
561	 10	135.0	19.1	 16
562	 10	57.3	7.5	 16
563	 10	69.0	13.7	 20
564	 10	123.3	17.3	 16
565	 10	168.5	31.1	 16
566	 10	534.0	73.5	 16
567	 10	51.5	8.4	 16
568	 10	53.3	9.2	 16
569	 10	131.5	17.1	 16
570	 10	212.0	33.1	 16
571	 10	366.0	32.9	 16
572	 10	236.5	28.5	 16
573	 10	71.0	10.6	 16
574	 10	152.0	17.7	 16
575	 10	163.3	26.0	 16
576	 10	128.3	26.2	 16
577	 10	81.5	10.7	 16
578	 10	53.0	9.9	 16
579	 10	53.0	7.7	 16
580	 10	78.3	10.9	 16
581	 10	93.3	12.4	 16
582	 10	99.5	7.3	 16
583	 10	63.0	11.7	 16
584	 10	77.3	16.2	 16
585	 10	94.0	12.5	 16
586	 10	65.3	11.6	 16
587	 10	55.5	12.0	 16
588	 10	69.3	12.9	 16
589	 10	69.0	11.4	 16
590	 10	88.0	18.9	 16
591	 10	81.3	14.0	 16
592	 10	50.5	11.0	 16
593	 10	70.0	13.2	 16
594	 10	77.0	10.8	 16
595	 10	136.5	15.5	 16
596	 10	136.8	23.2	 16
597	 10	165.3	17.6	 16
598	 10	136.0	16.0	 16
599	 10	178.0	24.1	 16
600	 10	169.5	21.5	 16
601	 10	94.3	15.4	 16
602	 10	71.0	14.0	 16
603	 10	84.0	13.8	 16
604	 10	56.0	7.9	 16
605	 10	68.3	12.1	 16
606	 10	265.8	35.5	 16
607	 10	66.0	14.0	 16
608	 10	59.3	13.6	 16
609	 10	55.5	7.7	 16
610	 10	135.5	22.0	 16
611	 10	109.3	16.3	 16
612	 10	107.5	19.1	 16
613	 10	561.8	61.8	 16
614	 10	66.0	13.2	 16
615	 10	65.8	11.2	 16
616	 10	74.0	12.3	 16
617	 10	152.8	18.2	 16
618	 10	94.5	9.7	 16
619	 10	53.0	9.1	 16
620	 10	74.0	16.5	 16
621	 10	89.3	15.2	 16
622	 10	52.8	10.9	 16
623	 10	74.5	13.4	 16
624	 10	70.8	18.9	 16
625	 10	58.5	9.1	 16
626	 10	50.3	7.4	 16
627	 10	64.8	8.9	 16
628	 10	114.5	15.0	 16
629	 10	72.3	12.1	 16
630	 10	119.3	17.5	 16
631	 10	273.3	40.3	 16
632	 10	192.3	25.8	 16
633	 10	75.5	16.4	 16
634	 10	602.0	77.5	 16
635	 10	298.3	65.9	 16
636	 10	116.3	17.4	 16
637	 10	51.5	8.7	 16
638	 10	60.8	14.3	 16
639	 10	47.3	7.6	 16
640	 10	56.3	8.4	 16
641	 10	475.3	68.4	 16
642	 10	52.5	9.4	 16
643	 10	57.3	14.5	 16
644	 10	122.5	18.4	 16
645	 10	51.0	10.2	 16
646	 10	86.5	18.2	 16
647	 10	102.8	19.5	 16
648	 10	329.3	41.0	 16
649	 10	59.8	9.7	 16
650	 10	52.3	10.2	 16
651	 10	53.8	9.1	 16
652	 10	57.3	8.7	 16
653	 10	216.5	37.9	 16
654	 10	96.0	14.1	 16
655	 10	94.3	15.0	 16
656	 10	54.5	9.3	 16
657	 10	64.5	9.5	 16
658	 10	401.3	60.5	 16
659	 10	65.0	11.5	 16
660	 10	74.3	13.9	 16
661	 10	57.3	8.8	 16
662	 10	68.8	11.8	 16
663	 10	164.3	26.8	 16
664	 10	69.0	7.9	 16
665	 10	78.3	11.8	 16
666	 10	64.3	8.3	 16
667	 10	231.8	32.9	 16
668	 10	159.5	21.4	 16
669	 10	153.0	26.2	 16
670	 10	152.3	25.0	 16
671	 10	132.5	26.7	 16
672	 10	131.5	28.3	 16
673	 10	85.0	13.9	 16
674	 10	83.0	17.9	 16
675	 10	84.5	19.9	 16
676	 10	105.3	24.9	 16
677	 10	144.8	21.8	 16
678	 10	68.5	10.3	 16
679	 10	65.0	13.9	 16
680	 10	412.0	74.1	 16
681	 10	1110.5	260.6	 16
682	 10	1286.8	139.3	 20
683	 10	1487.5	98.8	 16
684	 10	1516.0	135.4	 16
685	 10	151.5	23.1	 16
686	 10	104.5	25.2	 16
687	 10	89.0	19.8	 16
688	 10	56.5	11.9	 16
689	 10	56.5	10.6	 16
690	 10	55.3	11.0	 16
691	 10	185.8	30.3	 16
692	 10	64.3	13.3	 16
693	 10	101.8	15.1	 16
694	 10	64.5	11.6	 16
695	 10	61.5	11.7	 16
696	 10	59.3	11.9	 16
697	 10	139.0	24.8	 16
698	 10	269.0	100.1	 16
699	 10	137.8	19.0	 16
700	 10	96.5	13.6	 16
701	 10	75.5	18.0	 16
702	 10	55.3	8.7	 16
703	 10	63.0	13.2	 16
704	 10	53.3	11.5	 16
705	 10	82.0	10.9	 16
706	 10	82.5	17.0	 16
707	 10	120.5	18.3	 16
708	 10	379.5	23.2	 16
709	 10	353.0	28.0	 16
710	 10	218.3	33.9	 16
711	 10	5737.8	454.8	 16
  0	 11	94.3	10.1	 16
  1	 11	83.3	16.8	 16
  2	 11	55.8	10.4	 16
  3	 11	81.8	15.6	 16
  4	 11	64.3	11.8	 16
  5	 11	750.0	102.8	 16
  6	 11	61.5	11.3	 16
  7	 11	357.5	61.9	 16
  8	 11	127.0	22.0	 16
  9	 11	71.3	9.4	 16
 10	 11	88.0	10.9	 16
 11	 11	53.0	9.4	 16
 12	 11	120.8	20.4	 16
 13	 11	7465.3	1155.5	 16
 14	 11	7429.3	1113.5	 16
 15	 11	7128.3	929.2	 16
 16	 11	114.0	20.2	 16
 17	 11	53.3	6.3	 16
 18	 11	96.3	15.0	 16
 19	 11	7834.0	785.8	 16
 20	 11	7691.0	610.5	 16
 21	 11	7529.5	656.3	 16
 22	 11	88.3	13.4	 16
 23	 11	59.0	11.1	 16
 24	 11	7628.5	621.7	 16
 25	 11	89.0	13.9	 16
 26	 11	92.3	17.5	 16
 27	 11	85.8	11.2	 16
 28	 11	6862.8	450.3	 16
 29	 11	69.0	12.1	 16
 30	 11	114.5	19.7	 16
 31	 11	7815.8	671.4	 16
 32	 11	7638.8	746.5	 16
 33	 11	7250.5	922.3	 16
 34	 11	89.3	10.8	 16
 35	 11	54.3	10.8	 16
 36	 11	110.5	24.3	 16
 37	 11	7273.5	1126.7	 16
 38	 11	7026.8	1120.1	 16
 39	 11	6857.0	1279.1	 16
 40	 11	97.5	15.8	 16
 41	 11	54.3	9.8	 16
 42	 11	7415.0	1083.7	 16
 43	 11	91.8	15.7	 16
 44	 11	96.0	19.4	 16
 45	 11	99.5	21.9	 16
 46	 11	6555.3	704.9	 16
 47	 11	54.3	7.8	 16
 48	 11	83.0	12.9	 16
 49	 11	84.5	10.9	 16
 50	 11	6377.8	634.2	 16
 51	 11	98.0	19.5	 16
 52	 11	97.0	17.9	 16
 53	 11	69.5	13.4	 16
 54	 11	7157.0	605.9	 16
 55	 11	97.3	24.4	 16
 56	 11	73.5	8.8	 16
 57	 11	85.5	21.2	 16
 58	 11	85.3	16.1	 16
 59	 11	54.5	13.2	 16
 60	 11	50.0	10.3	 16
 61	 11	56.0	9.2	 16
 62	 11	7748.5	475.2	 16
 63	 11	101.3	18.2	 16
 64	 11	82.3	11.6	 16
 65	 11	105.3	23.7	 16
 66	 11	6412.0	679.1	 16
 67	 11	67.8	16.8	 16
 68	 11	91.5	16.1	 16
 69	 11	6967.8	492.7	 16
 70	 11	6668.8	447.5	 16
 71	 11	6530.0	429.8	 16
 72	 11	92.0	8.7	 16
 73	 11	53.0	10.4	 16
 74	 11	83.8	13.5	 16
 75	 11	75.8	10.5	 16
 76	 11	75.5	13.5	 16
 77	 11	85.3	13.8	 16
 78	 11	80.0	11.1	 16
 79	 11	46.0	7.4	 16
 80	 11	94.3	11.6	 16
 81	 11	6566.3	553.2	 16
 82	 11	6527.3	458.9	 16
 83	 11	6241.5	557.1	 16
 84	 11	117.5	27.0	 16
 85	 11	59.5	12.4	 16
 86	 11	80.3	11.9	 16
 87	 11	6254.0	875.1	 16
 88	 11	6484.8	172.0	 16
 89	 11	6307.0	831.7	 16
 90	 11	117.8	26.4	 16
 91	 11	50.3	8.1	 20
 92	 11	79.8	13.6	 16
 93	 11	6236.8	510.5	 16
 94	 11	6255.5	970.6	 16
 95	 11	94.0	17.1	 16
 96	 11	80.0	11.5	 16
 97	 11	50.5	8.6	 16
 98	 11	80.3	12.4	 16
 99	 11	6335.3	240.7	 16
100	 11	6065.3	661.7	 16
101	 11	95.0	11.5	 16
102	 11	83.5	15.5	 16
103	 11	49.8	7.4	 16
104	 11	6419.5	687.8	 16
105	 11	85.0	18.3	 16
106	 11	78.0	14.5	 16
107	 11	85.0	17.0	 16
108	 11	6094.5	641.1	 16
109	 11	48.8	9.1	 16
110	 11	42.5	9.2	 16
111	 11	77.0	14.1	 16
112	 11	1645.8	337.8	 16
113	 11	92.3	16.6	 16
114	 11	136.8	18.5	 16
115	 11	155.0	22.1	 16
116	 11	125.8	25.9	 16
117	 11	75.3	9.9	 16
118	 11	55.0	10.6	 16
119	 11	108.0	21.8	 16
120	 11	196.0	17.8	 16
121	 11	287.5	69.0	 16
122	 11	557.5	60.8	 16
123	 11	795.0	108.1	 16
124	 11	197.5	30.7	 16
125	 11	74.8	18.0	 16
126	 11	82.0	10.2	 16
127	 11	473.3	48.8	 16
128	 11	66.8	14.9	 16
129	 11	108.0	18.1	 16
130	 11	2907.3	361.2	 16
131	 11	86.3	19.9	 16
132	 11	114.3	25.4	 16
133	 11	83.5	20.0	 16
134	 11	208.0	24.2	 16
135	 11	127.8	22.1	 16
136	 11	57.8	11.5	 16
137	 11	62.0	11.3	 16
138	 11	65.5	13.5	 16
139	 11	139.0	18.8	 16
140	 11	72.8	14.6	 16
141	 11	81.5	14.2	 16
142	 11	1232.3	223.6	 16
143	 11	1042.0	148.9	 16
144	 11	69.3	17.7	 16
145	 11	59.3	12.2	 16
146	 11	493.5	88.5	 16
147	 11	65.3	8.5	 16
148	 11	78.3	13.3	 16
149	 11	182.3	25.1	 16
150	 11	92.0	17.3	 16
151	 11	100.0	19.2	 16
152	 11	214.0	29.8	 16
153	 11	1738.0	159.2	 16
154	 11	3731.5	298.4	 16
155	 11	573.0	50.2	 16
156	 11	73.3	15.9	 16
157	 11	352.5	26.7	 16
158	 11	533.3	60.2	 16
159	 11	196.5	31.3	 16
160	 11	59.0	9.3	 16
161	 11	727.8	109.5	 16
162	 11	66.3	11.8	 16
163	 11	61.3	10.6	 16
164	 11	56.5	8.6	 16
165	 11	62.5	11.8	 16
166	 11	1038.5	198.4	 16
167	 11	65.3	12.3	 16
168	 11	77.0	14.4	 16
169	 11	53.8	10.9	 16
170	 11	560.3	115.0	 16
171	 11	85.0	16.5	 16
172	 11	80.5	12.1	 16
173	 11	92.3	17.9	 16
174	 11	172.3	22.4	 16
175	 11	240.8	25.1	 16
176	 11	103.8	18.9	 16
177	 11	92.0	13.2	 16
178	 11	253.8	34.6	 16
179	 11	107.8	17.3	 16
180	 11	73.5	14.0	 16
181	 11	791.0	98.8	 16
182	 11	368.8	46.6	 16
183	 11	60.5	13.0	 16
184	 11	73.3	12.2	 16
185	 11	65.3	9.1	 16
186	 11	69.3	13.0	 16
187	 11	331.5	42.5	 16
188	 11	311.0	53.9	 16
189	 11	309.0	42.0	 16
190	 11	94.3	12.9	 16
191	 11	92.3	20.4	 16
192	 11	106.5	19.9	 16
193	 11	61.0	12.2	 16
194	 11	118.3	16.7	 16
195	 11	63.5	9.9	 16
196	 11	279.5	46.9	 16
197	 11	104.0	18.0	 16
198	 11	405.8	50.0	 16
199	 11	233.3	32.3	 16
200	 11	70.3	12.6	 16
201	 11	74.3	14.7	 16
202	 11	1293.0	216.7	 16
203	 11	77.0	13.9	 16
204	 11	53.8	14.4	 16
205	 11	57.0	8.4	 16
206	 11	70.8	9.5	 16
207	 11	51.0	6.6	 16
208	 11	176.5	29.8	 16
209	 11	279.8	55.1	 16
210	 11	202.8	38.3	 20
211	 11	64.8	11.3	 16
212	 11	77.5	12.0	 16
213	 11	136.0	15.2	 16
214	 11	190.5	35.9	 16
215	 11	455.0	31.8	 16
216	 11	241.0	31.8	 16
217	 11	69.0	9.2	 16
218	 11	122.0	28.2	 16
219	 11	173.8	26.9	 16
220	 11	57.0	9.0	 16
221	 11	309.0	55.9	 16
222	 11	1398.8	225.7	 16
223	 11	101.8	21.5	 16
224	 11	92.3	20.6	 16
225	 11	471.0	44.1	 16
226	 11	191.5	25.2	 16
227	 11	54.0	14.1	 16
228	 11	71.0	14.0	 16
229	 11	114.8	25.0	 16
230	 11	142.3	22.2	 16
231	 11	233.0	16.2	 16
232	 11	121.8	15.2	 16
233	 11	82.0	14.7	 16
234	 11	81.3	17.7	 16
235	 11	113.0	18.3	 16
236	 11	218.5	32.8	 16
237	 11	104.3	23.4	 16
238	 11	80.5	14.1	 16
239	 11	142.3	24.7	 16
240	 11	1427.5	203.1	 16
241	 11	125.3	17.7	 16
242	 11	942.8	176.2	 16
243	 11	58.5	7.6	 16
244	 11	66.5	10.8	 16
245	 11	208.0	38.0	 16
246	 11	63.0	8.9	 16
247	 11	64.0	11.5	 16
248	 11	1194.5	225.1	 16
249	 11	140.8	34.2	 16
250	 11	423.5	94.6	 16
251	 11	84.5	15.9	 16
252	 11	70.5	14.5	 16
253	 11	92.0	17.3	 16
254	 11	77.8	12.6	 16
255	 11	72.0	18.7	 16
256	 11	56.3	11.4	 16
257	 11	61.5	9.8	 16
258	 11	153.0	28.7	 16
259	 11	103.0	14.4	 16
260	 11	66.3	14.0	 16
261	 11	61.0	11.4	 16
262	 11	60.8	12.0	 16
263	 11	255.0	38.5	 16
264	 11	63.5	12.1	 16
265	 11	57.0	13.2	 16
266	 11	173.3	24.8	 16
267	 11	131.5	25.5	 16
268	 11	171.0	31.5	 16
269	 11	203.3	29.8	 16
270	 11	126.0	19.1	 16
271	 11	231.0	25.5	 16
272	 11	65.3	8.9	 16
273	 11	88.3	17.1	 16
274	 11	151.0	22.2	 16
275	 11	87.5	19.0	 16
276	 11	95.3	17.1	 16
277	 11	167.0	32.6	 16
278	 11	690.3	72.8	 16
279	 11	563.0	29.8	 16
280	 11	121.8	21.2	 16
281	 11	82.0	10.7	 16
282	 11	187.8	23.5	 16
283	 11	148.0	18.1	 16
284	 11	57.0	11.4	 16
285	 11	115.8	23.5	 16
286	 11	347.0	51.6	 16
287	 11	509.8	47.9	 16
288	 11	1665.8	120.5	 16
289	 11	268.0	20.7	 16
290	 11	62.5	11.7	 16
291	 11	95.0	25.2	 16
292	 11	193.5	21.8	 16
293	 11	425.3	48.1	 16
294	 11	119.8	22.0	 16
295	 11	402.5	43.0	 16
296	 11	518.5	51.2	 16
297	 11	1557.8	203.6	 16
298	 11	70.5	13.6	 16
299	 11	212.3	28.9	 16
300	 11	218.0	32.8	 16
301	 11	71.5	12.4	 16
302	 11	80.5	12.8	 16
303	 11	205.5	24.9	 16
304	 11	118.3	16.6	 16
305	 11	424.8	43.6	 16
306	 11	115.3	12.9	 16
307	 11	100.0	15.6	 16
308	 11	171.3	21.6	 16
309	 11	327.0	34.0	 16
310	 11	78.5	15.6	 16
311	 11	97.3	17.0	 16
312	 11	81.0	9.7	 16
313	 11	210.0	25.4	 16
314	 11	381.3	51.0	 16
315	 11	63.3	8.7	 16
316	 11	53.0	11.2	 16
317	 11	117.0	19.7	 16
318	 11	83.5	12.0	 16
319	 11	60.0	8.4	 16
320	 11	320.8	52.3	 16
321	 11	77.0	10.9	 16
322	 11	59.8	11.5	 16
323	 11	906.8	113.9	 16
324	 11	211.0	29.5	 16
325	 11	259.0	59.7	 16
326	 11	351.8	77.5	 16
327	 11	92.0	16.1	 16
328	 11	67.0	16.3	 16
329	 11	73.8	12.5	 20
330	 11	653.3	93.9	 16
331	 11	83.8	11.8	 16
332	 11	58.5	11.4	 16
333	 11	84.8	17.7	 16
334	 11	56.0	9.6	 16
335	 11	228.3	30.5	 16
336	 11	57.3	12.2	 16
337	 11	120.3	20.6	 16
338	 11	55.0	10.6	 16
339	 11	158.5	21.0	 16
340	 11	195.3	24.5	 16
341	 11	254.5	33.4	 16
342	 11	216.8	22.7	 16
343	 11	48.3	7.0	 16
344	 11	180.0	28.7	 16
345	 11	76.0	16.0	 16
346	 11	62.8	7.4	 16
347	 11	66.0	8.7	 16
348	 11	78.0	12.8	 16
349	 11	77.3	16.2	 16
350	 11	343.8	51.0	 16
351	 11	69.8	13.2	 16
352	 11	87.0	17.8	 16
353	 11	66.3	9.7	 16
354	 11	98.0	13.1	 16
355	 11	406.8	74.1	 16
356	 11	538.5	65.4	 16
357	 11	292.5	29.6	 16
358	 11	520.3	75.3	 16
359	 11	55.3	8.6	 16
360	 11	82.5	14.7	 16
361	 11	216.8	25.0	 16
362	 11	71.8	12.6	 16
363	 11	95.5	13.8	 16
364	 11	150.3	18.4	 16
365	 11	49.8	10.8	 16
366	 11	54.3	9.7	 16
367	 11	85.3	16.2	 16
368	 11	179.3	21.6	 16
369	 11	80.0	13.3	 16
370	 11	192.0	21.6	 16
371	 11	304.3	54.0	 16
372	 11	107.3	17.7	 16
373	 11	213.0	34.2	 16
374	 11	229.8	35.4	 16
375	 11	292.5	32.6	 16
376	 11	79.8	17.3	 16
377	 11	64.5	12.5	 16
378	 11	336.0	40.0	 16
379	 11	69.5	10.3	 16
380	 11	96.3	8.9	 16
381	 11	114.3	15.7	 16
382	 11	73.5	11.9	 16
383	 11	192.0	22.6	 16
384	 11	64.0	10.7	 16
385	 11	104.5	19.6	 16
386	 11	91.8	15.9	 16
387	 11	144.3	21.3	 16
388	 11	54.0	12.0	 16
389	 11	56.0	11.0	 16
390	 11	124.3	24.3	 16
391	 11	100.5	14.0	 16
392	 11	58.3	14.5	 16
393	 11	163.8	30.1	 16
394	 11	72.8	13.7	 16
395	 11	134.5	22.3	 16
396	 11	232.3	17.6	 16
397	 11	738.0	50.3	 16
398	 11	187.0	16.5	 16
399	 11	324.0	55.8	 16
400	 11	100.3	12.4	 16
401	 11	257.0	43.0	 16
402	 11	62.0	7.2	 16
403	 11	130.0	24.0	 16
404	 11	53.3	9.2	 16
405	 11	72.8	13.0	 16
406	 11	181.0	28.0	 16
407	 11	51.3	9.3	 16
408	 11	55.5	8.6	 16
409	 11	80.5	13.9	 16
410	 11	87.5	19.7	 16
411	 11	71.0	11.9	 16
412	 11	151.5	18.4	 16
413	 11	76.0	14.7	 16
414	 11	65.5	10.0	 16
415	 11	715.0	78.1	 16
416	 11	178.0	18.1	 16
417	 11	248.5	30.5	 16
418	 11	208.8	32.8	 16
419	 11	89.3	17.3	 16
420	 11	59.3	10.3	 16
421	 11	85.3	16.5	 16
422	 11	80.0	8.8	 16
423	 11	281.3	35.4	 16
424	 11	178.3	22.9	 16
425	 11	521.5	64.0	 16
426	 11	115.5	11.4	 16
427	 11	60.0	7.0	 16
428	 11	178.5	19.4	 16
429	 11	74.3	12.8	 16
430	 11	243.5	49.1	 16
431	 11	52.3	7.2	 16
432	 11	144.5	30.0	 16
433	 11	65.3	12.9	 16
434	 11	53.5	9.1	 16
435	 11	86.5	17.1	 16
436	 11	175.3	28.0	 16
437	 11	214.8	31.3	 16
438	 11	2804.3	321.4	 16
439	 11	196.0	36.2	 16
440	 11	65.5	13.6	 16
441	 11	122.8	14.5	 16
442	 11	132.3	19.5	 16
443	 11	309.5	34.1	 16
444	 11	54.0	10.8	 16
445	 11	196.8	21.3	 16
446	 11	90.0	14.6	 16
447	 11	118.3	16.7	 20
448	 11	108.3	18.7	 16
449	 11	67.8	10.7	 16
450	 11	155.5	22.1	 16
451	 11	127.8	20.9	 16
452	 11	109.3	21.1	 16
453	 11	60.0	13.8	 16
454	 11	65.0	13.5	 16
455	 11	308.5	73.0	 16
456	 11	78.8	13.8	 16
457	 11	151.5	27.5	 16
458	 11	131.8	22.1	 16
459	 11	161.0	20.2	 16
460	 11	261.0	54.0	 16
461	 11	70.3	14.3	 16
462	 11	79.3	13.1	 16
463	 11	254.8	35.9	 16
464	 11	139.3	25.6	 16
465	 11	56.3	6.9	 16
466	 11	101.8	19.4	 16
467	 11	54.5	7.3	 16
468	 11	179.5	16.9	 16
469	 11	771.0	117.5	 16
470	 11	58.3	13.6	 16
471	 11	123.3	18.6	 16
472	 11	216.8	46.3	 16
473	 11	79.3	6.7	 16
474	 11	86.0	14.2	 16
475	 11	70.5	12.2	 16
476	 11	164.3	31.8	 16
477	 11	59.0	13.7	 16
478	 11	122.8	15.7	 16
479	 11	183.3	30.7	 16
480	 11	81.3	11.2	 16
481	 11	497.5	88.3	 16
482	 11	144.8	25.6	 16
483	 11	159.3	21.5	 16
484	 11	52.3	10.4	 16
485	 11	66.8	12.0	 16
486	 11	438.3	94.3	 16
487	 11	183.3	32.3	 16
488	 11	131.0	30.9	 16
489	 11	55.3	11.8	 16
490	 11	88.3	12.7	 16
491	 11	52.5	8.8	 16
492	 11	81.8	15.6	 16
493	 11	71.3	15.5	 16
494	 11	257.5	34.0	 16
495	 11	68.3	11.8	 16
496	 11	490.5	52.8	 16
497	 11	482.8	47.4	 16
498	 11	530.3	57.7	 16
499	 11	258.5	30.5	 16
500	 11	166.0	42.6	 16
501	 11	83.0	12.9	 16
502	 11	67.8	14.2	 16
503	 11	67.3	14.0	 16
504	 11	950.5	126.1	 16
505	 11	88.3	13.1	 16
506	 11	53.5	14.0	 16
507	 11	56.0	12.2	 16
508	 11	54.3	7.6	 16
509	 11	48.3	5.3	 16
510	 11	104.8	13.6	 16
511	 11	116.5	20.3	 16
512	 11	59.3	9.8	 16
513	 11	100.5	18.3	 16
514	 11	101.0	17.7	 16
515	 11	51.0	8.6	 16
516	 11	90.0	22.3	 16
517	 11	558.3	65.8	 16
518	 11	68.3	11.7	 16
519	 11	660.5	83.3	 16
520	 11	1063.5	102.1	 16
521	 11	434.0	33.6	 16
522	 11	54.5	11.2	 16
523	 11	60.3	10.2	 16
524	 11	135.0	24.5	 16
525	 11	62.8	13.3	 16
526	 11	55.3	11.5	 16
527	 11	118.0	26.3	 16
528	 11	53.3	8.6	 16
529	 11	91.0	10.0	 16
530	 11	108.5	22.9	 16
531	 11	54.0	8.1	 16
532	 11	384.5	85.3	 16
533	 11	75.5	14.5	 16
534	 11	68.0	11.9	 16
535	 11	71.3	13.4	 16
536	 11	621.0	146.1	 16
537	 11	637.5	160.7	 16
538	 11	196.0	36.8	 16
539	 11	437.0	89.8	 16
540	 11	1225.3	301.1	 16
541	 11	89.3	11.9	 16
542	 11	66.3	11.0	 16
543	 11	110.3	15.1	 16
544	 11	52.3	11.2	 16
545	 11	238.3	32.6	 16
546	 11	112.5	19.4	 16
547	 11	223.5	32.1	 16
548	 11	138.5	28.4	 16
549	 11	74.5	16.2	 16
550	 11	357.0	47.3	 16
551	 11	180.0	25.3	 16
552	 11	67.8	14.8	 16
553	 11	125.0	20.3	 16
554	 11	1234.8	186.8	 16
555	 11	212.3	36.3	 16
556	 11	512.0	66.7	 16
557	 11	75.3	14.0	 16
558	 11	2352.8	388.5	 16
559	 11	108.5	14.1	 16
560	 11	305.5	46.6	 16
561	 11	667.5	65.7	 16
562	 11	388.3	48.5	 16
563	 11	185.0	28.4	 16
564	 11	363.0	83.1	 16
565	 11	396.0	63.5	 16
566	 11	74.3	8.9	 20
567	 11	98.5	12.4	 16
568	 11	251.3	30.1	 16
569	 11	345.0	37.8	 16
570	 11	3891.3	255.2	 16
571	 11	429.8	44.0	 16
572	 11	50.3	6.1	 16
573	 11	56.3	8.1	 16
574	 11	126.3	19.8	 16
575	 11	120.0	18.5	 16
576	 11	90.3	13.4	 16
577	 11	146.5	12.9	 16
578	 11	107.5	16.3	 16
579	 11	789.3	60.0	 16
580	 11	76.3	14.3	 16
581	 11	746.8	80.8	 16
582	 11	80.0	16.2	 16
583	 11	142.8	33.3	 16
584	 11	57.5	13.1	 16
585	 11	134.8	25.4	 16
586	 11	97.5	18.3	 16
587	 11	317.0	50.1	 16
588	 11	57.3	6.6	 16
589	 11	652.8	104.5	 16
590	 11	121.8	24.4	 16
591	 11	127.5	17.4	 16
592	 11	224.8	32.2	 16
593	 11	76.0	12.8	 16
594	 11	482.3	49.9	 16
595	 11	147.0	24.1	 16
596	 11	643.0	79.7	 16
597	 11	322.3	29.1	 16
598	 11	113.3	15.5	 16
599	 11	147.0	24.0	 16
600	 11	58.3	11.2	 16
601	 11	106.0	16.5	 16
602	 11	158.8	28.3	 16
603	 11	158.5	21.5	 16
604	 11	126.3	18.2	 16
605	 11	62.3	9.0	 16
606	 11	126.3	14.3	 16
607	 11	54.0	8.5	 16
608	 11	58.5	17.4	 16
609	 11	92.5	16.2	 16
610	 11	48.0	6.9	 16
611	 11	663.0	112.2	 16
612	 11	432.5	58.1	 16
613	 11	189.0	28.4	 16
614	 11	374.3	64.9	 16
615	 11	98.3	13.1	 16
616	 11	79.0	15.9	 16
617	 11	66.0	11.6	 16
618	 11	70.0	11.6	 16
619	 11	339.3	47.9	 16
620	 11	57.0	10.2	 16
621	 11	60.8	6.8	 16
622	 11	65.3	8.8	 16
623	 11	52.3	9.9	 16
624	 11	120.3	16.4	 16
625	 11	75.0	13.4	 16
626	 11	109.3	19.4	 16
627	 11	491.3	61.2	 16
628	 11	182.3	30.2	 16
629	 11	63.5	12.5	 16
630	 11	116.0	19.9	 16
631	 11	455.8	75.2	 16
632	 11	286.0	41.3	 16
633	 11	107.3	15.0	 16
634	 11	253.8	38.8	 16
635	 11	73.3	13.8	 16
636	 11	59.5	12.2	 16
637	 11	329.3	67.4	 16
638	 11	184.0	36.5	 16
639	 11	60.3	12.2	 16
640	 11	101.5	20.7	 16
641	 11	89.8	15.2	 16
642	 11	75.3	11.9	 16
643	 11	388.0	62.1	 16
644	 11	126.3	16.2	 16
645	 11	79.3	10.7	 16
646	 11	65.8	13.1	 16
647	 11	81.5	16.0	 16
648	 11	171.3	20.8	 16
649	 11	293.0	43.4	 16
650	 11	62.5	11.6	 16
651	 11	215.5	42.2	 16
652	 11	123.5	24.5	 16
653	 11	64.3	13.3	 16
654	 11	47.8	9.1	 16
655	 11	160.3	38.9	 16
656	 11	65.8	16.2	 16
657	 11	53.5	12.2	 16
658	 11	354.5	76.5	 16
659	 11	105.0	20.7	 16
660	 11	108.0	21.4	 16
661	 11	59.3	12.1	 16
662	 11	78.0	13.1	 16
663	 11	1898.3	408.2	 16
664	 11	886.8	172.6	 16
665	 11	327.5	58.8	 16
666	 11	310.3	45.1	 16
667	 11	67.8	13.2	 16
668	 11	257.8	50.5	 16
669	 11	840.5	174.0	 16
670	 11	286.8	70.5	 16
671	 11	1421.5	287.7	 16
672	 11	290.5	37.2	 16
673	 11	141.8	20.9	 16
674	 11	86.3	15.9	 16
675	 11	148.0	32.0	 16
676	 11	62.3	9.7	 16
677	 11	376.3	54.2	 16
678	 11	709.5	130.1	 16
679	 11	145.5	27.5	 16
680	 11	168.8	32.4	 16
681	 11	92.8	12.3	 16
682	 11	1279.5	232.7	 16
683	 11	137.0	14.3	 16
684	 11	732.8	153.4	 16
685	 11	166.8	19.4	 20
686	 11	120.3	15.8	 16
687	 11	69.0	9.8	 16
688	 11	110.8	19.6	 16
689	 11	66.3	9.4	 16
690	 11	64.8	13.1	 16
691	 11	58.0	6.0	 16
692	 11	77.3	16.3	 16
693	 11	58.3	10.4	 16
694	 11	136.5	16.0	 16
695	 11	114.3	22.6	 16
696	 11	60.8	10.9	 16
697	 11	1036.3	216.0	 16
698	 11	426.0	84.6	 16
699	 11	587.8	53.8	 16
700	 11	150.0	22.7	 16
701	 11	218.0	29.4	 16
702	 11	561.5	61.5	 16
703	 11	470.8	70.4	 16
704	 11	59.5	7.6	 16
705	 11	430.8	45.6	 16
706	 11	252.3	25.2	 16
707	 11	100.3	16.9	 16
708	 11	96.0	18.7	 16
709	 11	130.5	21.2	 16
710	 11	377.3	52.5	 16
711	 11	99.3	15.0	 16
  0	 12	7794.3	632.6	 16
  1	 12	86.8	14.7	 16
  2	 12	61.5	10.5	 16
  3	 12	64.5	12.6	 16
  4	 12	58.3	9.5	 16
  5	 12	98.0	13.6	 16
  6	 12	49.5	5.0	 16
  7	 12	150.0	18.2	 16
  8	 12	115.8	15.9	 16
  9	 12	53.3	10.0	 16
 10	 12	61.5	10.1	 16
 11	 12	45.0	7.9	 16
 12	 12	45.5	7.7	 16
 13	 12	51.5	9.6	 16
 14	 12	54.0	9.7	 16
 15	 12	47.5	9.1	 16
 16	 12	53.5	9.1	 16
 17	 12	47.5	7.8	 16
 18	 12	47.3	7.4	 16
 19	 12	53.3	10.1	 16
 20	 12	52.3	10.4	 16
 21	 12	52.0	9.9	 16
 22	 12	53.3	9.6	 16
 23	 12	39.0	8.1	 16
 24	 12	50.3	9.7	 16
 25	 12	50.3	12.2	 16
 26	 12	48.8	9.9	 16
 27	 12	49.3	8.8	 16
 28	 12	55.3	10.3	 16
 29	 12	49.8	8.2	 16
 30	 12	48.5	10.8	 16
 31	 12	64.0	11.9	 16
 32	 12	58.3	14.7	 16
 33	 12	49.3	19.9	 16
 34	 12	43.0	5.9	 16
 35	 12	58.0	14.0	 16
 36	 12	52.8	13.7	 16
 37	 12	55.5	16.2	 16
 38	 12	52.5	12.9	 16
 39	 12	70.3	16.2	 16
 40	 12	47.0	9.6	 16
 41	 12	49.3	9.0	 16
 42	 12	44.0	6.1	 16
 43	 12	47.3	9.9	 16
 44	 12	53.5	7.4	 16
 45	 12	52.0	9.7	 16
 46	 12	49.8	8.5	 16
 47	 12	65.0	11.1	 16
 48	 12	67.3	7.4	 16
 49	 12	57.3	9.1	 16
 50	 12	60.3	10.5	 16
 51	 12	64.0	11.9	 16
 52	 12	73.5	13.5	 16
 53	 12	60.5	11.6	 16
 54	 12	61.8	12.2	 16
 55	 12	42.5	8.2	 16
 56	 12	48.3	10.9	 16
 57	 12	49.8	12.8	 16
 58	 12	50.5	7.2	 16
 59	 12	44.0	8.1	 16
 60	 12	48.3	14.0	 16
 61	 12	49.3	10.4	 16
 62	 12	52.3	11.9	 16
 63	 12	45.5	7.9	 16
 64	 12	68.5	23.9	 16
 65	 12	52.0	10.2	 16
 66	 12	52.5	10.2	 16
 67	 12	47.8	11.1	 16
 68	 12	49.0	10.7	 16
 69	 12	49.0	9.3	 16
 70	 12	56.3	9.1	 16
 71	 12	48.5	8.3	 16
 72	 12	45.8	7.8	 16
 73	 12	42.5	5.0	 16
 74	 12	43.3	6.6	 16
 75	 12	44.5	12.0	 16
 76	 12	50.0	9.4	 16
 77	 12	52.0	10.2	 16
 78	 12	45.8	30.6	 16
 79	 12	43.5	9.0	 16
 80	 12	61.0	14.0	 16
 81	 12	58.3	12.8	 16
 82	 12	57.0	13.4	 16
 83	 12	55.5	12.3	 16
 84	 12	56.3	9.2	 16
 85	 12	49.3	9.0	 16
 86	 12	52.5	7.9	 16
 87	 12	58.3	13.2	 16
 88	 12	54.3	12.6	 16
 89	 12	53.0	13.9	 16
 90	 12	47.5	9.3	 16
 91	 12	43.5	7.8	 16
 92	 12	53.3	18.7	 16
 93	 12	42.3	8.6	 16
 94	 12	57.3	13.6	 20
 95	 12	52.8	11.3	 16
 96	 12	48.5	9.1	 16
 97	 12	44.0	7.5	 16
 98	 12	45.3	9.4	 16
 99	 12	46.3	8.0	 16
100	 12	45.5	8.6	 16
101	 12	43.3	10.9	 16
102	 12	51.0	17.2	 16
103	 12	44.8	8.0	 16
104	 12	46.5	10.0	 16
105	 12	45.3	7.9	 16
106	 12	47.3	9.2	 16
107	 12	44.5	10.9	 16
108	 12	47.3	11.5	 16
109	 12	45.3	12.3	 16
110	 12	41.0	9.8	 16
111	 12	59.3	10.3	 16
112	 12	137.0	18.0	 16
113	 12	387.8	56.7	 16
114	 12	136.3	21.6	 16
115	 12	114.3	11.9	 16
116	 12	113.5	12.2	 16
117	 12	57.5	9.2	 16
118	 12	57.5	13.7	 16
119	 12	79.3	13.9	 16
120	 12	93.5	21.0	 16
121	 12	105.3	38.3	 16
122	 12	102.3	16.3	 16
123	 12	175.5	32.7	 16
124	 12	239.8	33.9	 16
125	 12	70.0	12.5	 16
126	 12	71.3	12.4	 16
127	 12	158.5	22.6	 16
128	 12	65.8	11.2	 16
129	 12	73.5	15.3	 16
130	 12	275.3	42.5	 16
131	 12	71.5	14.3	 16
132	 12	64.0	9.1	 16
133	 12	85.3	17.2	 16
134	 12	65.3	12.1	 16
135	 12	105.3	15.3	 16
136	 12	61.8	10.6	 16
137	 12	53.0	7.8	 16
138	 12	53.3	10.3	 16
139	 12	53.0	12.0	 16
140	 12	54.5	10.4	 16
141	 12	83.5	16.1	 16
142	 12	317.8	45.8	 16
143	 12	270.3	39.1	 16
144	 12	63.3	10.1	 16
145	 12	68.8	11.7	 16
146	 12	97.8	17.1	 16
147	 12	63.8	10.2	 16
148	 12	55.3	8.5	 16
149	 12	89.5	16.8	 16
150	 12	63.5	12.6	 16
151	 12	127.8	16.4	 16
152	 12	98.8	17.2	 16
153	 12	213.0	25.2	 16
154	 12	824.0	84.6	 16
155	 12	61.3	9.7	 16
156	 12	58.3	9.4	 16
157	 12	129.5	22.1	 16
158	 12	480.3	43.4	 16
159	 12	97.5	16.1	 16
160	 12	59.3	11.5	 16
161	 12	165.0	26.2	 16
162	 12	52.3	9.6	 16
163	 12	49.8	10.0	 16
164	 12	60.5	10.0	 16
165	 12	60.3	9.9	 16
166	 12	176.0	23.0	 16
167	 12	57.5	7.3	 16
168	 12	53.3	11.6	 16
169	 12	58.3	8.0	 16
170	 12	137.3	21.5	 16
171	 12	57.8	10.1	 16
172	 12	93.8	21.2	 16
173	 12	63.8	10.1	 16
174	 12	61.3	11.9	 16
175	 12	92.3	14.6	 16
176	 12	88.0	12.0	 16
177	 12	110.5	21.5	 16
178	 12	72.8	15.6	 16
179	 12	74.0	15.4	 16
180	 12	72.3	12.1	 16
181	 12	174.3	15.8	 16
182	 12	86.8	13.4	 16
183	 12	57.3	10.8	 16
184	 12	65.3	8.8	 16
185	 12	65.3	14.1	 16
186	 12	61.0	11.4	 16
187	 12	166.8	23.4	 16
188	 12	71.3	13.6	 16
189	 12	129.5	19.3	 16
190	 12	70.5	12.0	 16
191	 12	76.8	16.3	 16
192	 12	108.3	18.8	 16
193	 12	57.0	13.9	 16
194	 12	164.8	28.8	 16
195	 12	51.5	8.9	 16
196	 12	95.3	15.3	 16
197	 12	61.0	10.3	 16
198	 12	77.0	12.3	 16
199	 12	253.5	41.7	 16
200	 12	55.0	10.8	 16
201	 12	67.5	12.9	 16
202	 12	139.5	27.7	 16
203	 12	59.8	16.3	 16
204	 12	55.0	8.8	 16
205	 12	64.5	11.3	 16
206	 12	53.5	9.7	 16
207	 12	48.3	6.8	 16
208	 12	56.3	5.9	 16
209	 12	92.5	15.6	 16
210	 12	68.8	10.6	 16
211	 12	56.0	10.0	 16
212	 12	109.5	25.2	 16
213	 12	115.8	21.7	 20
214	 12	157.8	29.0	 16
215	 12	399.3	39.1	 16
216	 12	342.0	38.2	 16
217	 12	83.3	12.0	 16
218	 12	56.0	8.7	 16
219	 12	81.0	14.9	 16
220	 12	72.0	12.1	 16
221	 12	121.0	19.8	 16
222	 12	452.0	44.6	 16
223	 12	59.0	9.5	 16
224	 12	51.3	14.0	 16
225	 12	78.0	16.5	 16
226	 12	66.3	9.5	 16
227	 12	56.0	13.4	 16
228	 12	63.3	7.4	 16
229	 12	117.0	15.5	 16
230	 12	234.8	26.9	 16
231	 12	115.3	17.2	 16
232	 12	84.3	16.2	 16
233	 12	73.8	10.1	 16
234	 12	63.3	12.2	 16
235	 12	110.0	24.3	 16
236	 12	139.5	17.0	 16
237	 12	68.5	14.5	 16
238	 12	83.0	17.8	 16
239	 12	67.3	8.5	 16
240	 12	198.3	32.1	 16
241	 12	83.3	14.8	 16
242	 12	119.0	27.1	 16
243	 12	61.3	9.3	 16
244	 12	70.3	15.1	 16
245	 12	78.3	13.0	 16
246	 12	65.5	10.8	 16
247	 12	60.5	11.4	 16
248	 12	85.5	18.6	 16
249	 12	68.0	11.6	 16
250	 12	91.3	19.0	 16
251	 12	68.8	14.9	 16
252	 12	52.3	8.0	 16
253	 12	74.3	12.9	 16
254	 12	74.8	15.4	 16
255	 12	60.3	12.7	 16
256	 12	56.3	12.1	 16
257	 12	59.5	28.0	 16
258	 12	98.5	24.3	 16
259	 12	94.5	14.5	 16
260	 12	70.0	12.6	 16
261	 12	61.8	10.6	 16
262	 12	61.3	10.7	 16
263	 12	94.3	14.7	 16
264	 12	53.0	10.9	 16
265	 12	58.3	13.1	 16
266	 12	279.0	42.8	 16
267	 12	116.0	14.2	 16
268	 12	105.5	14.3	 16
269	 12	100.3	19.5	 16
270	 12	104.8	30.8	 16
271	 12	124.0	15.0	 16
272	 12	74.0	33.4	 16
273	 12	70.3	10.5	 16
274	 12	130.0	14.8	 16
275	 12	165.5	22.3	 16
276	 12	68.3	11.4	 16
277	 12	75.8	13.6	 16
278	 12	118.3	22.3	 16
279	 12	143.8	18.1	 16
280	 12	71.5	12.2	 16
281	 12	86.0	17.3	 16
282	 12	162.0	20.3	 16
283	 12	73.8	14.0	 16
284	 12	64.3	8.8	 16
285	 12	56.8	7.1	 16
286	 12	114.8	20.2	 16
287	 12	87.5	12.6	 16
288	 12	346.3	42.1	 16
289	 12	94.0	15.2	 16
290	 12	51.5	10.2	 16
291	 12	57.5	9.5	 16
292	 12	75.8	15.3	 16
293	 12	107.3	20.0	 16
294	 12	67.5	8.3	 16
295	 12	150.0	21.5	 16
296	 12	163.0	22.9	 16
297	 12	149.5	27.1	 16
298	 12	63.3	10.5	 16
299	 12	120.0	19.8	 16
300	 12	102.0	13.6	 16
301	 12	92.0	14.5	 16
302	 12	98.8	14.0	 16
303	 12	98.3	17.5	 16
304	 12	122.0	15.3	 16
305	 12	615.8	57.5	 16
306	 12	126.5	19.3	 16
307	 12	79.8	14.2	 16
308	 12	156.8	22.4	 16
309	 12	270.0	34.8	 16
310	 12	59.5	9.4	 16
311	 12	76.5	14.5	 16
312	 12	69.8	14.3	 16
313	 12	255.8	23.0	 16
314	 12	70.5	7.7	 16
315	 12	61.5	8.3	 16
316	 12	49.0	8.1	 16
317	 12	64.8	11.8	 16
318	 12	57.0	8.8	 16
319	 12	60.5	12.5	 16
320	 12	63.3	11.9	 16
321	 12	56.8	10.5	 16
322	 12	50.5	8.0	 16
323	 12	204.8	30.4	 16
324	 12	211.3	26.3	 16
325	 12	68.8	10.7	 16
326	 12	96.0	13.7	 16
327	 12	61.5	13.4	 16
328	 12	54.0	10.1	 16
329	 12	73.8	9.4	 16
330	 12	147.0	21.3	 16
331	 12	61.5	12.2	 16
332	 12	53.0	11.3	 20
333	 12	67.0	13.8	 16
334	 12	58.3	10.1	 16
335	 12	104.5	22.8	 16
336	 12	57.0	11.4	 16
337	 12	56.3	9.9	 16
338	 12	58.0	7.9	 16
339	 12	59.5	11.7	 16
340	 12	57.3	10.8	 16
341	 12	162.0	28.9	 16
342	 12	97.0	19.9	 16
343	 12	60.5	11.3	 16
344	 12	81.5	15.6	 16
345	 12	70.3	14.4	 16
346	 12	60.3	10.0	 16
347	 12	66.8	9.5	 16
348	 12	76.0	13.8	 16
349	 12	75.0	13.6	 16
350	 12	447.8	42.7	 16
351	 12	63.5	12.2	 16
352	 12	72.0	11.6	 16
353	 12	109.5	13.0	 16
354	 12	118.5	23.3	 16
355	 12	193.8	21.0	 16
356	 12	240.3	19.7	 16
357	 12	79.3	12.2	 16
358	 12	75.3	12.3	 16
359	 12	52.0	11.6	 16
360	 12	94.0	18.4	 16
361	 12	281.8	30.1	 16
362	 12	64.0	12.5	 16
363	 12	55.0	9.7	 16
364	 12	58.8	10.8	 16
365	 12	54.3	10.2	 16
366	 12	58.3	11.4	 16
367	 12	49.0	12.0	 16
368	 12	56.5	17.0	 16
369	 12	87.5	25.5	 16
370	 12	85.3	14.6	 16
371	 12	230.0	29.5	 16
372	 12	145.3	20.0	 16
373	 12	58.0	14.9	 16
374	 12	57.0	12.6	 16
375	 12	157.3	16.8	 16
376	 12	54.5	12.1	 16
377	 12	60.0	13.8	 16
378	 12	95.3	16.5	 16
379	 12	78.0	11.2	 16
380	 12	68.0	12.8	 16
381	 12	92.5	15.1	 16
382	 12	97.0	13.9	 16
383	 12	66.0	13.6	 16
384	 12	85.5	15.4	 16
385	 12	49.3	9.5	 16
386	 12	65.0	11.5	 16
387	 12	58.5	9.8	 16
388	 12	53.3	9.9	 16
389	 12	49.3	9.6	 16
390	 12	65.0	12.8	 16
391	 12	53.0	10.6	 16
392	 12	54.8	9.4	 16
393	 12	74.5	12.3	 16
394	 12	65.5	8.6	 16
395	 12	65.5	9.0	 16
396	 12	104.8	11.4	 16
397	 12	299.5	33.9	 16
398	 12	171.3	20.4	 16
399	 12	91.8	14.0	 16
400	 12	87.5	14.7	 16
401	 12	75.5	13.0	 16
402	 12	73.0	11.3	 16
403	 12	52.3	9.3	 16
404	 12	54.0	9.9	 16
405	 12	57.3	11.6	 16
406	 12	57.0	9.4	 16
407	 12	55.0	11.0	 16
408	 12	67.0	12.6	 16
409	 12	106.3	18.0	 16
410	 12	151.8	21.0	 16
411	 12	82.0	11.9	 16
412	 12	58.8	10.5	 16
413	 12	65.0	9.0	 16
414	 12	59.0	10.0	 16
415	 12	114.3	15.8	 16
416	 12	101.8	18.8	 16
417	 12	93.5	17.4	 16
418	 12	147.3	23.5	 16
419	 12	73.8	7.2	 16
420	 12	54.0	12.2	 16
421	 12	135.3	17.2	 16
422	 12	65.3	15.5	 16
423	 12	98.3	14.6	 16
424	 12	240.3	22.5	 16
425	 12	236.5	27.6	 16
426	 12	142.8	26.5	 16
427	 12	67.8	11.8	 16
428	 12	62.8	13.7	 16
429	 12	71.3	10.3	 16
430	 12	81.5	14.4	 16
431	 12	62.3	11.3	 16
432	 12	57.0	9.7	 16
433	 12	62.3	9.5	 16
434	 12	54.3	9.9	 16
435	 12	58.0	10.7	 16
436	 12	67.3	15.6	 16
437	 12	71.3	14.1	 16
438	 12	628.0	90.6	 16
439	 12	87.8	18.8	 16
440	 12	62.5	10.3	 16
441	 12	209.3	25.2	 16
442	 12	65.8	9.8	 16
443	 12	106.5	15.1	 16
444	 12	60.0	9.7	 16
445	 12	144.5	27.0	 16
446	 12	61.3	11.0	 16
447	 12	78.0	8.1	 16
448	 12	72.3	12.4	 16
449	 12	65.3	10.1	 16
450	 12	73.5	14.4	 20
451	 12	84.3	14.2	 16
452	 12	58.5	12.5	 16
453	 12	53.0	11.0	 16
454	 12	66.5	10.8	 16
455	 12	55.5	8.8	 16
456	 12	60.3	11.4	 16
457	 12	121.3	17.6	 16
458	 12	104.0	18.6	 16
459	 12	104.0	20.7	 16
460	 12	64.8	12.7	 16
461	 12	100.5	11.8	 16
462	 12	153.5	31.3	 16
463	 12	333.8	39.9	 16
464	 12	105.8	16.1	 16
465	 12	53.3	5.9	 16
466	 12	70.5	11.9	 16
467	 12	59.3	9.5	 16
468	 12	62.3	9.4	 16
469	 12	219.3	28.3	 16
470	 12	99.5	27.5	 16
471	 12	209.0	39.2	 16
472	 12	187.5	27.1	 16
473	 12	85.0	17.3	 16
474	 12	68.0	10.3	 16
475	 12	58.0	9.5	 16
476	 12	66.3	11.6	 16
477	 12	49.3	9.2	 16
478	 12	74.8	12.8	 16
479	 12	80.3	13.0	 16
480	 12	76.0	11.0	 16
481	 12	159.0	22.6	 16
482	 12	78.8	14.8	 16
483	 12	64.3	11.3	 16
484	 12	59.0	10.6	 16
485	 12	55.3	9.3	 16
486	 12	122.3	17.0	 16
487	 12	64.3	10.4	 16
488	 12	62.5	13.4	 16
489	 12	59.0	10.6	 16
490	 12	57.5	10.3	 16
491	 12	53.8	10.8	 16
492	 12	68.3	17.3	 16
493	 12	56.0	5.3	 16
494	 12	346.0	36.9	 16
495	 12	66.0	11.3	 16
496	 12	2420.0	102.0	 16
497	 12	2529.5	123.2	 16
498	 12	2534.0	146.4	 16
499	 12	172.3	28.9	 16
500	 12	79.8	12.1	 16
501	 12	66.3	12.7	 16
502	 12	56.3	11.4	 16
503	 12	60.0	10.6	 16
504	 12	122.8	14.8	 16
505	 12	63.8	9.2	 16
506	 12	56.5	12.6	 16
507	 12	56.3	12.1	 16
508	 12	62.5	10.6	 16
509	 12	56.5	10.1	 16
510	 12	82.3	10.6	 16
511	 12	155.5	27.1	 16
512	 12	66.5	13.0	 16
513	 12	103.0	17.1	 16
514	 12	85.5	11.4	 16
515	 12	62.3	12.8	 16
516	 12	86.0	13.0	 16
517	 12	74.5	13.4	 16
518	 12	66.3	9.0	 16
519	 12	73.5	11.8	 16
520	 12	72.8	11.9	 16
521	 12	115.0	19.1	 16
522	 12	57.8	12.7	 16
523	 12	52.3	11.0	 16
524	 12	202.8	26.0	 16
525	 12	45.5	9.0	 16
526	 12	57.0	10.1	 16
527	 12	49.0	8.4	 16
528	 12	50.3	8.9	 16
529	 12	156.3	24.3	 16
530	 12	59.3	10.1	 16
531	 12	51.8	9.3	 16
532	 12	66.8	11.1	 16
533	 12	72.3	15.3	 16
534	 12	65.5	11.1	 16
535	 12	58.3	8.7	 16
536	 12	174.5	30.5	 16
537	 12	155.3	20.2	 16
538	 12	105.3	15.7	 16
539	 12	221.3	34.3	 16
540	 12	293.0	44.2	 16
541	 12	107.5	13.5	 16
542	 12	127.3	19.0	 16
543	 12	77.8	11.0	 16
544	 12	56.5	9.1	 16
545	 12	58.3	9.3	 16
546	 12	69.3	15.6	 16
547	 12	118.0	20.0	 16
548	 12	101.3	17.2	 16
549	 12	62.5	9.0	 16
550	 12	90.0	16.5	 16
551	 12	70.8	12.7	 16
552	 12	50.3	11.4	 16
553	 12	69.5	10.2	 16
554	 12	192.3	34.6	 16
555	 12	85.5	14.9	 16
556	 12	112.3	15.8	 16
557	 12	67.8	10.3	 16
558	 12	280.0	54.2	 16
559	 12	88.3	13.2	 16
560	 12	517.3	78.4	 16
561	 12	508.0	54.4	 16
562	 12	108.3	12.5	 16
563	 12	119.0	23.6	 16
564	 12	116.8	18.7	 16
565	 12	129.0	19.8	 16
566	 12	74.3	10.7	 16
567	 12	136.5	20.6	 16
568	 12	72.5	12.9	 16
569	 12	79.5	12.7	 20
570	 12	564.3	82.2	 16
571	 12	161.5	30.0	 16
572	 12	58.3	9.9	 16
573	 12	53.0	11.7	 16
574	 12	63.3	11.2	 16
575	 12	62.3	9.7	 16
576	 12	56.5	8.6	 16
577	 12	88.3	20.4	 16
578	 12	99.3	12.7	 16
579	 12	242.3	36.5	 16
580	 12	66.5	11.3	 16
581	 12	324.8	32.1	 16
582	 12	55.5	11.1	 16
583	 12	186.3	25.6	 16
584	 12	73.8	8.6	 16
585	 12	216.3	32.3	 16
586	 12	280.3	27.3	 16
587	 12	81.8	11.1	 16
588	 12	65.0	11.6	 16
589	 12	110.5	24.7	 16
590	 12	91.8	16.0	 16
591	 12	72.5	9.9	 16
592	 12	103.0	13.2	 16
593	 12	62.3	14.4	 16
594	 12	224.8	28.5	 16
595	 12	95.0	12.2	 16
596	 12	169.3	34.5	 16
597	 12	120.8	15.3	 16
598	 12	129.8	25.3	 16
599	 12	105.5	23.2	 16
600	 12	312.3	29.0	 16
601	 12	105.0	17.0	 16
602	 12	106.3	13.6	 16
603	 12	107.3	16.6	 16
604	 12	78.0	11.9	 16
605	 12	48.8	7.7	 16
606	 12	63.3	11.7	 16
607	 12	58.3	11.6	 16
608	 12	48.0	10.1	 16
609	 12	57.5	12.0	 16
610	 12	54.3	10.8	 16
611	 12	84.5	19.5	 16
612	 12	88.3	19.3	 16
613	 12	195.5	36.6	 16
614	 12	117.0	14.4	 16
615	 12	71.0	13.9	 16
616	 12	50.5	9.7	 16
617	 12	57.5	11.5	 16
618	 12	65.3	12.1	 16
619	 12	306.3	42.7	 16
620	 12	66.0	14.9	 16
621	 12	50.3	6.7	 16
622	 12	54.5	8.7	 16
623	 12	48.5	12.0	 16
624	 12	53.5	9.4	 16
625	 12	58.5	8.4	 16
626	 12	68.0	12.4	 16
627	 12	90.0	15.4	 16
628	 12	72.3	12.6	 16
629	 12	53.5	10.7	 16
630	 12	63.8	10.3	 16
631	 12	90.3	15.6	 16
632	 12	95.0	12.5	 16
633	 12	87.5	16.2	 16
634	 12	172.0	24.1	 16
635	 12	62.0	8.7	 16
636	 12	53.0	11.0	 16
637	 12	66.0	12.2	 16
638	 12	76.3	12.7	 16
639	 12	51.8	10.7	 16
640	 12	170.5	23.7	 16
641	 12	78.5	15.3	 16
642	 12	52.0	6.7	 16
643	 12	109.3	15.9	 16
644	 12	76.8	17.6	 16
645	 12	57.5	15.7	 16
646	 12	90.3	14.4	 16
647	 12	92.3	14.9	 16
648	 12	102.5	13.3	 16
649	 12	188.0	32.0	 16
650	 12	72.8	9.9	 16
651	 12	54.0	5.8	 16
652	 12	58.5	8.6	 16
653	 12	60.5	13.8	 16
654	 12	49.3	9.0	 16
655	 12	72.5	18.6	 16
656	 12	57.8	9.0	 16
657	 12	47.3	5.2	 16
658	 12	87.5	16.7	 16
659	 12	54.3	7.9	 16
660	 12	56.0	10.9	 16
661	 12	50.8	10.0	 16
662	 12	96.0	17.0	 16
663	 12	247.3	39.3	 16
664	 12	191.3	28.7	 16
665	 12	82.3	16.6	 16
666	 12	157.0	28.5	 16
667	 12	59.3	10.8	 16
668	 12	132.3	29.2	 16
669	 12	241.0	41.1	 16
670	 12	123.5	27.6	 16
671	 12	334.3	64.5	 16
672	 12	415.8	68.4	 16
673	 12	57.8	10.5	 16
674	 12	85.8	12.1	 16
675	 12	56.0	10.3	 16
676	 12	58.0	12.9	 16
677	 12	83.0	14.8	 16
678	 12	185.3	28.9	 16
679	 12	204.3	34.0	 16
680	 12	265.3	45.4	 16
681	 12	144.3	17.8	 16
682	 12	206.3	33.8	 16
683	 12	134.3	18.2	 16
684	 12	126.3	22.7	 16
685	 12	168.3	21.3	 16
686	 12	94.8	12.4	 16
687	 12	66.3	12.3	 16
688	 12	56.0	8.1	 20
689	 12	56.3	11.0	 16
690	 12	68.0	15.3	 16
691	 12	58.5	7.2	 16
692	 12	55.0	11.6	 16
693	 12	65.5	12.0	 16
694	 12	89.3	13.2	 16
695	 12	84.8	11.6	 16
696	 12	56.0	8.4	 16
697	 12	155.5	27.8	 16
698	 12	72.8	21.4	 16
699	 12	96.0	15.0	 16
700	 12	218.3	29.3	 16
701	 12	86.5	10.1	 16
702	 12	101.8	24.6	 16
703	 12	75.5	10.9	 16
704	 12	66.8	14.4	 16
705	 12	96.8	15.9	 16
706	 12	110.3	18.0	 16
707	 12	101.3	16.7	 16
708	 12	139.3	11.9	 16
709	 12	103.3	18.6	 16
710	 12	108.0	17.9	 16
711	 12	5885.0	478.8	 16
  0	 13	83.8	11.9	 16
  1	 13	178.3	27.3	 16
  2	 13	76.3	13.9	 16
  3	 13	73.8	15.3	 16
  4	 13	144.3	15.4	 16
  5	 13	117.8	22.9	 16
  6	 13	53.3	11.4	 16
  7	 13	153.0	21.6	 16
  8	 13	99.0	17.0	 16
  9	 13	196.3	34.0	 16
 10	 13	121.0	18.8	 16
 11	 13	58.5	9.5	 16
 12	 13	66.5	14.1	 16
 13	 13	71.0	11.3	 16
 14	 13	67.5	14.2	 16
 15	 13	181.5	30.7	 16
 16	 13	374.0	43.1	 16
 17	 13	690.0	58.3	 16
 18	 13	124.8	19.2	 16
 19	 13	186.0	20.0	 16
 20	 13	175.5	23.9	 16
 21	 13	328.3	35.9	 16
 22	 13	57.0	14.3	 16
 23	 13	80.3	13.7	 16
 24	 13	66.5	12.2	 16
 25	 13	188.8	31.8	 16
 26	 13	68.0	12.3	 16
 27	 13	980.5	70.2	 16
 28	 13	171.8	23.9	 16
 29	 13	60.5	12.7	 16
 30	 13	57.0	9.4	 16
 31	 13	1402.0	201.6	 16
 32	 13	70.3	9.6	 16
 33	 13	331.8	33.5	 16
 34	 13	1254.8	176.2	 16
 35	 13	734.5	122.1	 16
 36	 13	77.3	9.8	 16
 37	 13	588.3	83.0	 16
 38	 13	85.8	14.9	 16
 39	 13	163.3	26.0	 16
 40	 13	126.8	29.1	 16
 41	 13	122.0	17.8	 16
 42	 13	162.5	19.8	 16
 43	 13	95.0	18.1	 16
 44	 13	65.5	12.3	 16
 45	 13	160.3	19.7	 16
 46	 13	984.0	88.4	 16
 47	 13	4326.0	228.9	 16
 48	 13	166.0	26.1	 16
 49	 13	76.0	16.0	 16
 50	 13	91.3	20.1	 16
 51	 13	1653.0	160.0	 16
 52	 13	154.0	24.1	 16
 53	 13	64.8	8.8	 16
 54	 13	81.8	12.8	 16
 55	 13	81.3	15.1	 16
 56	 13	65.3	10.8	 16
 57	 13	67.5	15.0	 16
 58	 13	76.3	10.3	 16
 59	 13	73.0	13.6	 16
 60	 13	96.5	19.4	 16
 61	 13	81.0	12.4	 16
 62	 13	111.0	16.0	 16
 63	 13	109.0	18.3	 16
 64	 13	2403.3	435.5	 16
 65	 13	619.0	119.1	 16
 66	 13	112.5	16.7	 16
 67	 13	160.0	13.6	 16
 68	 13	467.8	49.5	 16
 69	 13	114.5	14.3	 16
 70	 13	53.8	11.7	 16
 71	 13	273.3	22.6	 16
 72	 13	63.3	12.2	 16
 73	 13	56.3	11.0	 16
 74	 13	493.0	46.8	 16
 75	 13	69.3	13.6	 16
 76	 13	80.5	15.2	 16
 77	 13	2044.0	150.7	 16
 78	 13	304.0	37.9	 16
 79	 13	55.3	9.9	 16
 80	 13	452.5	56.9	 16
 81	 13	83.0	10.4	 16
 82	 13	374.8	61.1	 16
 83	 13	110.8	19.4	 16
 84	 13	53.0	10.8	 16
 85	 13	56.0	6.1	 16
 86	 13	145.0	23.0	 16
 87	 13	87.3	14.6	 16
 88	 13	361.8	40.5	 16
 89	 13	609.8	73.4	 16
 90	 13	143.8	22.6	 16
 91	 13	407.3	51.2	 16
 92	 13	84.3	17.6	 16
 93	 13	82.0	15.8	 16
 94	 13	97.8	14.9	 16
 95	 13	64.0	15.5	 16
 96	 13	92.8	29.3	 16
 97	 13	58.0	8.5	 20
 98	 13	57.5	8.9	 16
 99	 13	67.8	12.6	 16
100	 13	105.0	17.0	 16
101	 13	844.0	85.2	 16
102	 13	65.3	9.6	 16
103	 13	100.0	22.1	 16
104	 13	62.3	10.9	 16
105	 13	78.3	17.3	 16
106	 13	407.3	47.7	 16
107	 13	47.5	8.6	 16
108	 13	110.3	14.1	 16
109	 13	71.3	11.6	 16
110	 13	77.0	8.7	 16
111	 13	220.5	33.2	 16
112	 13	514.0	60.0	 16
113	 13	78.0	19.0	 16
114	 13	51.8	6.7	 16
115	 13	130.3	19.8	 16
116	 13	100.5	15.6	 16
117	 13	145.5	22.4	 16
118	 13	62.3	11.5	 16
119	 13	92.8	10.8	 16
120	 13	1155.8	119.2	 16
121	 13	162.3	18.3	 16
122	 13	67.3	13.6	 16
123	 13	99.0	15.9	 16
124	 13	185.8	29.2	 16
125	 13	73.0	13.4	 16
126	 13	1504.8	126.9	 16
127	 13	100.5	15.5	 16
128	 13	104.0	15.9	 16
129	 13	465.0	50.3	 16
130	 13	78.8	15.5	 16
131	 13	504.3	64.4	 16
132	 13	394.5	57.9	 16
133	 13	404.3	57.1	 16
134	 13	1825.5	208.8	 16
135	 13	104.0	22.1	 16
136	 13	60.5	10.4	 16
137	 13	247.8	40.0	 16
138	 13	270.5	45.5	 16
139	 13	120.3	23.0	 16
140	 13	104.8	15.3	 16
141	 13	58.5	10.7	 16
142	 13	618.0	93.2	 16
143	 13	76.5	12.6	 16
144	 13	188.5	33.4	 16
145	 13	496.8	39.8	 16
146	 13	1495.5	81.0	 16
147	 13	74.3	11.3	 16
148	 13	549.8	56.7	 16
149	 13	96.5	15.6	 16
150	 13	115.3	24.5	 16
151	 13	58.0	9.6	 16
152	 13	96.0	18.1	 16
153	 13	5458.0	420.5	 16
154	 13	360.0	38.4	 16
155	 13	70.0	12.3	 16
156	 13	81.8	12.2	 16
157	 13	82.5	10.9	 16
158	 13	115.0	22.7	 16
159	 13	292.5	37.2	 16
160	 13	54.8	10.7	 16
161	 13	115.8	11.6	 16
162	 13	57.0	11.0	 16
163	 13	59.3	9.3	 16
164	 13	98.8	15.5	 16
165	 13	420.8	48.7	 16
166	 13	72.3	13.5	 16
167	 13	172.5	34.7	 16
168	 13	70.3	13.8	 16
169	 13	82.3	19.6	 16
170	 13	90.5	12.8	 16
171	 13	69.3	13.7	 16
172	 13	200.3	34.8	 16
173	 13	61.0	10.5	 16
174	 13	123.5	19.2	 16
175	 13	85.0	42.4	 16
176	 13	94.3	19.2	 16
177	 13	70.3	13.7	 16
178	 13	170.8	29.5	 16
179	 13	77.0	12.3	 16
180	 13	257.8	23.0	 16
181	 13	162.5	22.0	 16
182	 13	266.8	44.7	 16
183	 13	94.8	17.5	 16
184	 13	161.0	29.4	 16
185	 13	63.8	17.0	 16
186	 13	1552.8	227.2	 16
187	 13	491.8	97.6	 16
188	 13	119.5	18.7	 16
189	 13	77.3	18.0	 16
190	 13	303.0	66.4	 16
191	 13	159.0	24.2	 16
192	 13	223.8	23.1	 16
193	 13	109.0	15.9	 16
194	 13	73.5	11.4	 16
195	 13	263.5	50.0	 16
196	 13	82.5	15.2	 16
197	 13	82.3	14.5	 16
198	 13	342.8	47.4	 16
199	 13	87.5	20.1	 16
200	 13	551.8	60.8	 16
201	 13	45.5	11.5	 16
202	 13	174.3	15.2	 16
203	 13	109.5	14.7	 16
204	 13	57.0	11.1	 16
205	 13	72.8	18.5	 16
206	 13	120.8	28.6	 16
207	 13	74.0	13.3	 16
208	 13	103.5	18.2	 16
209	 13	64.0	11.1	 16
210	 13	87.0	18.6	 16
211	 13	235.3	47.6	 16
212	 13	2506.3	462.8	 16
213	 13	129.3	24.5	 16
214	 13	61.0	8.4	 16
215	 13	127.5	30.5	 16
216	 13	69.0	14.8	 20
217	 13	59.0	11.1	 16
218	 13	49.5	9.1	 16
219	 13	61.3	11.0	 16
220	 13	161.5	19.8	 16
221	 13	178.3	30.9	 16
222	 13	193.8	38.5	 16
223	 13	223.8	36.4	 16
224	 13	61.5	8.7	 16
225	 13	61.0	12.0	 16
226	 13	61.5	8.7	 16
227	 13	72.0	12.2	 16
228	 13	93.3	13.3	 16
229	 13	72.0	9.7	 16
230	 13	65.5	12.3	 16
231	 13	231.8	26.6	 16
232	 13	265.5	42.6	 16
233	 13	175.3	22.7	 16
234	 13	61.5	10.1	 16
235	 13	1261.3	117.4	 16
236	 13	192.0	24.7	 16
237	 13	1786.3	95.6	 16
238	 13	1735.0	179.6	 16
239	 13	673.0	91.3	 16
240	 13	319.0	45.9	 16
241	 13	4119.0	531.8	 16
242	 13	4765.3	793.6	 16
243	 13	366.8	60.1	 16
244	 13	283.0	56.1	 16
245	 13	55.0	12.0	 16
246	 13	158.8	22.4	 16
247	 13	190.0	36.4	 16
248	 13	145.0	33.0	 16
249	 13	102.8	17.0	 16
250	 13	62.8	13.6	 16
251	 13	91.0	8.2	 16
252	 13	60.5	12.2	 16
253	 13	56.3	8.6	 16
254	 13	62.3	10.4	 16
255	 13	72.8	12.0	 16
256	 13	889.3	115.8	 16
257	 13	68.3	10.5	 16
258	 13	82.5	11.0	 16
259	 13	73.5	16.9	 16
260	 13	57.8	14.7	 16
261	 13	266.8	46.1	 16
262	 13	95.8	16.6	 16
263	 13	570.0	58.8	 16
264	 13	57.3	8.0	 16
265	 13	93.0	13.4	 16
266	 13	357.5	45.0	 16
267	 13	253.3	32.8	 16
268	 13	66.0	12.0	 16
269	 13	356.0	37.7	 16
270	 13	292.8	39.2	 16
271	 13	100.3	15.5	 16
272	 13	105.5	12.7	 16
273	 13	85.8	12.3	 16
274	 13	79.8	10.7	 16
275	 13	75.0	17.0	 16
276	 13	2626.0	446.8	 16
277	 13	333.8	48.2	 16
278	 13	397.8	42.7	 16
279	 13	88.0	14.7	 16
280	 13	69.0	12.6	 16
281	 13	64.5	10.6	 16
282	 13	79.8	15.3	 16
283	 13	108.5	16.1	 16
284	 13	53.5	10.4	 16
285	 13	69.3	14.7	 16
286	 13	819.5	68.6	 16
287	 13	446.5	29.4	 16
288	 13	113.8	15.9	 16
289	 13	79.8	17.4	 16
290	 13	254.5	34.4	 16
291	 13	87.3	16.4	 16
292	 13	225.0	27.6	 16
293	 13	70.5	9.8	 16
294	 13	192.3	18.6	 16
295	 13	229.3	28.7	 16
296	 13	117.8	20.8	 16
297	 13	177.5	21.3	 16
298	 13	229.5	31.3	 16
299	 13	192.3	18.5	 16
300	 13	181.5	28.4	 16
301	 13	134.0	19.3	 16
302	 13	286.3	41.3	 16
303	 13	262.0	39.2	 16
304	 13	577.5	70.9	 16
305	 13	326.0	32.8	 16
306	 13	713.5	90.3	 16
307	 13	80.5	16.7	 16
308	 13	79.5	9.2	 16
309	 13	332.0	26.4	 16
310	 13	563.5	61.3	 16
311	 13	100.0	16.2	 16
312	 13	125.3	20.7	 16
313	 13	94.0	18.4	 16
314	 13	116.5	21.1	 16
315	 13	58.3	10.0	 16
316	 13	103.8	17.8	 16
317	 13	96.0	15.7	 16
318	 13	51.0	11.1	 16
319	 13	62.0	12.7	 16
320	 13	99.5	15.6	 16
321	 13	92.3	16.3	 16
322	 13	103.5	20.1	 16
323	 13	1214.8	130.7	 16
324	 13	93.3	17.5	 16
325	 13	185.5	21.4	 16
326	 13	231.5	28.3	 16
327	 13	116.5	14.0	 16
328	 13	71.8	16.0	 16
329	 13	508.8	96.8	 16
330	 13	595.5	34.8	 16
331	 13	603.8	85.5	 16
332	 13	204.8	39.7	 16
333	 13	228.3	28.6	 16
334	 13	60.3	9.7	 20
335	 13	49.5	7.9	 16
336	 13	54.3	7.5	 16
337	 13	68.3	11.4	 16
338	 13	249.5	26.7	 16
339	 13	165.8	18.3	 16
340	 13	335.8	46.4	 16
341	 13	3191.8	371.0	 16
342	 13	156.3	25.7	 16
343	 13	68.3	11.9	 16
344	 13	64.3	11.1	 16
345	 13	135.0	20.7	 16
346	 13	458.5	42.7	 16
347	 13	59.0	8.6	 16
348	 13	145.5	26.6	 16
349	 13	1175.3	197.1	 16
350	 13	3056.3	516.0	 16
351	 13	321.5	46.0	 16
352	 13	166.3	41.3	 16
353	 13	2011.8	381.1	 16
354	 13	382.8	66.6	 16
355	 13	242.8	36.7	 16
356	 13	194.0	31.6	 16
357	 13	156.0	18.2	 16
358	 13	72.3	11.4	 16
359	 13	57.0	11.0	 16
360	 13	73.0	12.8	 16
361	 13	346.0	37.1	 16
362	 13	117.8	22.2	 16
363	 13	61.3	12.8	 16
364	 13	72.3	12.9	 16
365	 13	73.3	10.3	 16
366	 13	58.0	16.5	 16
367	 13	385.5	45.4	 16
368	 13	54.3	8.5	 16
369	 13	116.3	16.2	 16
370	 13	249.5	24.6	 16
371	 13	490.0	62.2	 16
372	 13	275.8	50.3	 16
373	 13	113.5	20.2	 16
374	 13	53.5	9.9	 16
375	 13	148.5	19.6	 16
376	 13	82.8	13.7	 16
377	 13	173.5	26.3	 16
378	 13	75.3	12.3	 16
379	 13	304.3	51.3	 16
380	 13	315.0	42.3	 16
381	 13	58.5	11.1	 16
382	 13	59.3	8.3	 16
383	 13	118.0	33.1	 16
384	 13	514.5	56.3	 16
385	 13	65.0	11.8	 16
386	 13	119.3	25.7	 16
387	 13	58.0	12.4	 16
388	 13	83.0	14.3	 16
389	 13	88.0	18.2	 16
390	 13	168.3	25.6	 16
391	 13	163.8	21.9	 16
392	 13	55.0	11.7	 16
393	 13	53.0	8.7	 16
394	 13	278.5	35.8	 16
395	 13	71.3	12.9	 16
396	 13	261.3	30.3	 16
397	 13	171.8	27.0	 16
398	 13	108.5	22.7	 16
399	 13	80.8	13.1	 16
400	 13	658.3	73.0	 16
401	 13	500.5	65.3	 16
402	 13	84.3	12.6	 16
403	 13	64.8	10.4	 16
404	 13	89.5	18.7	 16
405	 13	49.3	10.4	 16
406	 13	235.8	33.5	 16
407	 13	127.0	20.0	 16
408	 13	98.3	12.6	 16
409	 13	89.8	20.2	 16
410	 13	380.0	47.8	 16
411	 13	105.5	18.6	 16
412	 13	69.3	13.4	 16
413	 13	407.3	38.1	 16
414	 13	768.5	67.9	 16
415	 13	173.3	25.2	 16
416	 13	195.3	39.7	 16
417	 13	156.3	26.0	 16
418	 13	150.5	33.3	 16
419	 13	125.3	19.7	 16
420	 13	71.5	8.9	 16
421	 13	68.5	13.6	 16
422	 13	185.8	31.4	 16
423	 13	73.0	11.2	 16
424	 13	106.8	20.1	 16
425	 13	86.0	14.4	 16
426	 13	61.3	10.3	 16
427	 13	846.5	112.4	 16
428	 13	114.0	12.4	 16
429	 13	348.3	48.6	 16
430	 13	115.8	24.4	 16
431	 13	324.5	44.1	 16
432	 13	1331.3	247.9	 16
433	 13	1470.5	242.1	 16
434	 13	1339.5	247.8	 16
435	 13	181.0	31.6	 16
436	 13	95.8	14.0	 16
437	 13	404.0	67.3	 16
438	 13	120.5	10.5	 16
439	 13	2673.5	327.3	 16
440	 13	88.3	11.7	 16
441	 13	271.5	43.0	 16
442	 13	114.8	13.4	 16
443	 13	90.0	17.5	 16
444	 13	151.3	21.4	 16
445	 13	65.0	14.0	 16
446	 13	113.0	17.5	 16
447	 13	108.0	17.8	 16
448	 13	89.5	13.8	 16
449	 13	55.0	9.7	 16
450	 13	61.3	11.9	 16
451	 13	64.0	16.3	 16
452	 13	55.0	8.6	 16
453	 13	100.5	16.6	 20
454	 13	88.0	15.3	 16
455	 13	451.5	76.6	 16
456	 13	54.0	8.1	 16
457	 13	168.5	35.1	 16
458	 13	89.8	12.3	 16
459	 13	85.3	12.9	 16
460	 13	80.0	13.6	 16
461	 13	164.5	20.0	 16
462	 13	1255.0	124.7	 16
463	 13	262.8	43.7	 16
464	 13	109.3	17.8	 16
465	 13	234.3	20.8	 16
466	 13	253.0	33.2	 16
467	 13	445.3	55.3	 16
468	 13	59.3	8.4	 16
469	 13	237.0	33.6	 16
470	 13	107.5	17.6	 16
471	 13	399.5	50.3	 16
472	 13	89.5	13.3	 16
473	 13	375.5	35.7	 16
474	 13	173.5	23.0	 16
475	 13	63.8	11.6	 16
476	 13	74.8	18.9	 16
477	 13	136.8	18.6	 16
478	 13	55.3	7.9	 16
479	 13	66.3	12.0	 16
480	 13	10475.3	931.8	 16
481	 13	621.0	68.3	 16
482	 13	358.3	71.9	 16
483	 13	79.0	13.2	 16
484	 13	52.5	8.1	 16
485	 13	441.8	51.0	 16
486	 13	537.3	76.4	 16
487	 13	598.0	79.2	 16
488	 13	177.5	27.8	 16
489	 13	75.3	10.6	 16
490	 13	88.8	14.1	 16
491	 13	62.3	7.7	 16
492	 13	67.5	12.0	 16
493	 13	63.5	8.3	 16
494	 13	53.3	9.8	 16
495	 13	80.0	12.9	 16
496	 13	63.3	12.0	 16
497	 13	206.8	36.4	 16
498	 13	62.0	9.0	 16
499	 13	166.8	24.4	 16
500	 13	249.5	40.4	 16
501	 13	89.3	14.8	 16
502	 13	163.3	22.4	 16
503	 13	55.3	13.2	 16
504	 13	117.3	20.0	 16
505	 13	66.0	13.2	 16
506	 13	280.0	21.2	 16
507	 13	172.0	24.6	 16
508	 13	1547.3	196.4	 16
509	 13	428.5	41.5	 16
510	 13	112.5	13.1	 16
511	 13	134.0	22.4	 16
512	 13	80.0	12.4	 16
513	 13	161.0	23.1	 16
514	 13	242.5	25.6	 16
515	 13	519.0	58.2	 16
516	 13	154.5	54.4	 16
517	 13	133.5	19.8	 16
518	 13	59.0	10.4	 16
519	 13	141.3	14.6	 16
520	 13	73.0	11.5	 16
521	 13	86.0	16.3	 16
522	 13	127.8	15.6	 16
523	 13	138.3	20.4	 16
524	 13	141.3	15.9	 16
525	 13	55.3	7.5	 16
526	 13	64.3	10.6	 16
527	 13	109.3	18.2	 16
528	 13	193.5	12.2	 16
529	 13	174.3	25.4	 16
530	 13	244.5	42.9	 16
531	 13	64.5	8.3	 16
532	 13	184.8	29.7	 16
533	 13	80.0	17.4	 16
534	 13	76.5	11.2	 16
535	 13	672.8	117.1	 16
536	 13	64.5	13.3	 16
537	 13	110.3	19.8	 16
538	 13	107.8	22.7	 16
539	 13	115.8	24.6	 16
540	 13	109.5	20.6	 16
541	 13	174.5	24.5	 16
542	 13	51.3	10.5	 16
543	 13	188.3	29.7	 16
544	 13	57.3	11.9	 16
545	 13	243.5	39.8	 16
546	 13	462.0	64.2	 16
547	 13	822.0	63.4	 16
548	 13	556.0	49.7	 16
549	 13	212.3	31.7	 16
550	 13	66.3	16.6	 16
551	 13	108.3	14.9	 16
552	 13	77.3	17.6	 16
553	 13	4086.0	599.9	 16
554	 13	61.5	11.2	 16
555	 13	50.3	9.7	 16
556	 13	627.3	102.6	 16
557	 13	61.5	9.7	 16
558	 13	46.3	9.1	 16
559	 13	114.3	22.9	 16
560	 13	71.5	11.6	 16
561	 13	77.0	14.1	 16
562	 13	337.3	74.7	 16
563	 13	1754.3	347.6	 16
564	 13	122.5	20.2	 16
565	 13	89.5	13.2	 16
566	 13	354.3	84.4	 16
567	 13	480.3	73.1	 16
568	 13	193.0	20.8	 16
569	 13	123.5	18.3	 16
570	 13	91.0	14.4	 16
571	 13	52.0	9.9	 16
572	 13	175.0	39.7	 20
573	 13	257.0	33.0	 16
574	 13	98.8	12.7	 16
575	 13	135.8	26.1	 16
576	 13	152.8	25.9	 16
577	 13	111.0	20.6	 16
578	 13	290.3	38.1	 16
579	 13	752.0	66.5	 16
580	 13	208.3	22.4	 16
581	 13	184.8	20.0	 16
582	 13	109.0	24.2	 16
583	 13	175.3	30.8	 16
584	 13	651.8	52.8	 16
585	 13	101.0	16.3	 16
586	 13	107.0	13.1	 16
587	 13	318.3	48.6	 16
588	 13	52.5	9.2	 16
589	 13	91.3	16.8	 16
590	 13	86.5	15.5	 16
591	 13	298.3	38.9	 16
592	 13	1060.0	206.3	 16
593	 13	112.0	21.6	 16
594	 13	308.3	43.9	 16
595	 13	771.0	82.7	 16
596	 13	65.0	9.2	 16
597	 13	2432.3	186.2	 16
598	 13	261.8	34.2	 16
599	 13	138.8	25.6	 16
600	 13	102.5	13.7	 16
601	 13	94.0	12.1	 16
602	 13	236.3	14.3	 16
603	 13	71.0	9.8	 16
604	 13	97.5	16.7	 16
605	 13	205.0	28.4	 16
606	 13	242.8	34.9	 16
607	 13	95.0	13.0	 16
608	 13	104.8	13.9	 16
609	 13	110.8	17.6	 16
610	 13	54.8	10.4	 16
611	 13	52.3	9.5	 16
612	 13	74.8	13.0	 16
613	 13	100.0	14.1	 16
614	 13	153.0	21.3	 16
615	 13	200.0	21.0	 16
616	 13	280.8	32.0	 16
617	 13	101.8	19.9	 16
618	 13	179.0	36.1	 16
619	 13	226.8	24.2	 16
620	 13	77.8	11.4	 16
621	 13	66.0	11.1	 16
622	 13	129.8	22.5	 16
623	 13	386.0	51.9	 16
624	 13	124.5	16.2	 16
625	 13	101.0	11.5	 16
626	 13	59.0	8.0	 16
627	 13	72.5	15.1	 16
628	 13	84.0	14.2	 16
629	 13	55.3	8.4	 16
630	 13	1725.5	195.5	 16
631	 13	2529.5	334.9	 16
632	 13	95.8	11.7	 16
633	 13	261.5	32.4	 16
634	 13	722.8	63.1	 16
635	 13	522.0	76.3	 16
636	 13	889.5	124.6	 16
637	 13	46.0	10.7	 16
638	 13	311.5	49.6	 16
639	 13	107.8	18.0	 16
640	 13	205.8	26.9	 16
641	 13	154.5	20.9	 16
642	 13	111.5	19.8	 16
643	 13	79.0	14.2	 16
644	 13	81.0	14.2	 16
645	 13	155.0	28.7	 16
646	 13	119.5	18.9	 16
647	 13	347.3	54.7	 16
648	 13	73.8	9.1	 16
649	 13	69.0	10.9	 16
650	 13	154.3	25.2	 16
651	 13	62.8	8.7	 16
652	 13	188.8	22.0	 16
653	 13	70.0	11.9	 16
654	 13	73.5	11.1	 16
655	 13	61.3	11.2	 16
656	 13	52.5	9.6	 16
657	 13	47.5	9.1	 16
658	 13	352.8	55.0	 16
659	 13	943.0	187.1	 16
660	 13	1474.3	272.2	 16
661	 13	239.3	32.5	 16
662	 13	176.5	32.7	 16
663	 13	341.0	46.0	 16
664	 13	1846.0	408.1	 16
665	 13	120.3	19.2	 16
666	 13	1698.3	335.0	 16
667	 13	54.5	14.3	 16
668	 13	785.5	184.7	 16
669	 13	50.8	9.8	 16
670	 13	126.3	28.6	 16
671	 13	76.5	16.0	 16
672	 13	75.3	11.8	 16
673	 13	100.0	17.9	 16
674	 13	68.3	15.3	 16
675	 13	52.5	9.8	 16
676	 13	99.8	22.7	 16
677	 13	324.8	61.8	 16
678	 13	84.5	12.0	 16
679	 13	82.3	13.0	 16
680	 13	879.8	149.9	 16
681	 13	130.5	19.1	 16
682	 13	138.8	24.3	 16
683	 13	90.3	15.6	 16
684	 13	291.3	57.0	 16
685	 13	212.0	39.3	 16
686	 13	68.8	14.1	 16
687	 13	62.3	13.7	 16
688	 13	83.3	11.1	 16
689	 13	1037.5	197.5	 16
690	 13	98.0	15.6	 20
691	 13	227.5	27.2	 16
692	 13	236.3	29.8	 16
693	 13	324.8	46.5	 16
694	 13	83.0	14.5	 16
695	 13	204.8	41.4	 16
696	 13	332.3	62.5	 16
697	 13	114.0	19.4	 16
698	 13	2912.5	545.6	 16
699	 13	288.8	42.8	 16
700	 13	130.3	23.8	 16
701	 13	270.8	30.5	 16
702	 13	1386.3	99.5	 16
703	 13	482.5	71.3	 16
704	 13	117.5	18.4	 16
705	 13	102.0	16.6	 16
706	 13	109.3	17.0	 16
707	 13	1021.8	106.1	 16
708	 13	192.3	21.0	 16
709	 13	230.5	29.5	 16
710	 13	1288.0	157.2	 16
711	 13	102.3	18.9	 16
  0	 14	8051.8	569.4	 16
  1	 14	194.5	20.6	 16
  2	 14	75.5	12.5	 16
  3	 14	64.0	10.3	 16
  4	 14	96.8	16.3	 16
  5	 14	73.3	14.1	 16
  6	 14	55.0	9.0	 16
  7	 14	63.3	10.5	 16
  8	 14	257.5	30.9	 16
  9	 14	111.8	21.5	 16
 10	 14	60.5	13.3	 16
 11	 14	71.3	12.8	 16
 12	 14	59.3	14.5	 16
 13	 14	50.5	8.8	 16
 14	 14	63.5	10.4	 16
 15	 14	246.5	30.0	 16
 16	 14	285.8	27.1	 16
 17	 14	105.0	10.2	 16
 18	 14	77.3	8.3	 16
 19	 14	77.5	16.3	 16
 20	 14	91.3	16.3	 16
 21	 14	72.3	17.1	 16
 22	 14	63.3	12.5	 16
 23	 14	62.0	10.0	 16
 24	 14	57.5	10.2	 16
 25	 14	59.5	12.3	 16
 26	 14	61.0	10.8	 16
 27	 14	125.8	18.6	 16
 28	 14	77.0	15.6	 16
 29	 14	62.3	11.2	 16
 30	 14	52.8	9.1	 16
 31	 14	171.8	22.6	 16
 32	 14	71.5	11.9	 16
 33	 14	65.0	11.0	 16
 34	 14	100.3	18.5	 16
 35	 14	75.0	17.3	 16
 36	 14	63.3	10.6	 16
 37	 14	145.0	19.3	 16
 38	 14	68.3	10.2	 16
 39	 14	97.5	24.1	 16
 40	 14	62.5	12.8	 16
 41	 14	192.0	27.3	 16
 42	 14	54.3	10.5	 16
 43	 14	61.5	11.2	 16
 44	 14	58.3	13.9	 16
 45	 14	159.5	18.8	 16
 46	 14	164.5	21.1	 16
 47	 14	1913.8	169.1	 16
 48	 14	207.3	31.7	 16
 49	 14	69.3	9.7	 16
 50	 14	61.5	10.6	 16
 51	 14	534.5	62.1	 16
 52	 14	111.5	22.2	 16
 53	 14	73.3	12.2	 16
 54	 14	106.0	15.1	 16
 55	 14	83.3	16.8	 16
 56	 14	64.8	13.1	 16
 57	 14	59.3	10.7	 16
 58	 14	64.0	13.8	 16
 59	 14	50.3	7.7	 16
 60	 14	76.3	12.7	 16
 61	 14	70.3	8.8	 16
 62	 14	130.0	20.1	 16
 63	 14	133.3	14.8	 16
 64	 14	338.5	65.0	 16
 65	 14	78.3	14.3	 16
 66	 14	83.0	16.5	 16
 67	 14	96.3	18.0	 16
 68	 14	90.0	13.4	 16
 69	 14	70.0	12.0	 16
 70	 14	55.3	8.5	 16
 71	 14	84.3	11.4	 16
 72	 14	65.3	11.1	 16
 73	 14	60.0	11.3	 16
 74	 14	58.3	8.5	 16
 75	 14	58.5	9.6	 16
 76	 14	67.5	10.7	 16
 77	 14	309.3	44.2	 16
 78	 14	71.3	12.6	 16
 79	 14	63.3	13.3	 16
 80	 14	122.3	17.1	 16
 81	 14	74.3	13.4	 16
 82	 14	76.8	13.9	 16
 83	 14	53.8	5.8	 16
 84	 14	45.3	6.5	 16
 85	 14	60.3	10.9	 16
 86	 14	106.5	11.4	 16
 87	 14	70.5	12.6	 16
 88	 14	251.3	22.5	 16
 89	 14	493.8	49.8	 16
 90	 14	86.0	12.7	 16
 91	 14	212.0	36.1	 16
 92	 14	62.5	11.1	 16
 93	 14	76.0	10.7	 16
 94	 14	146.0	24.4	 16
 95	 14	71.8	7.9	 16
 96	 14	61.5	8.4	 16
 97	 14	53.0	8.5	 16
 98	 14	54.0	8.6	 16
 99	 14	67.5	13.6	 16
100	 14	72.5	17.9	 20
101	 14	247.0	44.1	 16
102	 14	65.0	13.4	 16
103	 14	80.5	12.9	 16
104	 14	60.0	11.2	 16
105	 14	59.3	7.8	 16
106	 14	98.0	21.3	 16
107	 14	49.3	7.7	 16
108	 14	52.8	9.7	 16
109	 14	50.8	14.5	 16
110	 14	71.5	14.9	 16
111	 14	70.5	15.8	 16
112	 14	171.3	22.2	 16
113	 14	64.3	11.2	 16
114	 14	78.5	17.2	 16
115	 14	68.0	15.1	 16
116	 14	90.5	19.8	 16
117	 14	77.8	18.0	 16
118	 14	66.3	9.3	 16
119	 14	105.3	21.4	 16
120	 14	283.0	42.5	 16
121	 14	94.3	17.8	 16
122	 14	51.5	8.3	 16
123	 14	69.3	11.0	 16
124	 14	75.3	15.5	 16
125	 14	128.8	21.9	 16
126	 14	179.0	18.4	 16
127	 14	87.0	22.5	 16
128	 14	73.3	10.0	 16
129	 14	214.8	22.1	 16
130	 14	74.5	10.9	 16
131	 14	88.0	15.1	 16
132	 14	69.3	16.1	 16
133	 14	97.3	17.9	 16
134	 14	295.5	40.0	 16
135	 14	70.3	12.6	 16
136	 14	60.0	7.9	 16
137	 14	61.5	10.3	 16
138	 14	447.3	43.2	 16
139	 14	75.8	14.2	 16
140	 14	65.5	13.9	 16
141	 14	63.0	35.6	 16
142	 14	66.0	11.6	 16
143	 14	68.0	10.6	 16
144	 14	78.5	14.6	 16
145	 14	248.0	38.1	 16
146	 14	498.5	57.1	 16
147	 14	66.0	9.6	 16
148	 14	170.5	18.4	 16
149	 14	92.5	18.8	 16
150	 14	92.8	13.7	 16
151	 14	57.0	8.9	 16
152	 14	49.3	10.2	 16
153	 14	1757.8	184.5	 16
154	 14	86.0	14.7	 16
155	 14	57.0	13.4	 16
156	 14	87.0	17.9	 16
157	 14	99.0	20.7	 16
158	 14	224.5	20.1	 16
159	 14	113.3	14.5	 16
160	 14	56.0	10.0	 16
161	 14	86.0	12.4	 16
162	 14	63.0	12.4	 16
163	 14	61.0	9.6	 16
164	 14	81.0	11.8	 16
165	 14	67.8	14.1	 16
166	 14	68.3	14.5	 16
167	 14	83.5	15.1	 16
168	 14	65.8	16.5	 16
169	 14	49.5	9.4	 16
170	 14	66.0	13.2	 16
171	 14	59.3	11.3	 16
172	 14	73.3	11.3	 16
173	 14	59.5	16.3	 16
174	 14	59.3	8.7	 16
175	 14	68.0	12.2	 16
176	 14	73.3	11.6	 16
177	 14	86.0	13.2	 16
178	 14	73.3	8.9	 16
179	 14	50.5	8.9	 16
180	 14	158.8	17.2	 16
181	 14	117.5	34.6	 16
182	 14	280.5	33.5	 16
183	 14	64.0	9.6	 16
184	 14	94.5	12.1	 16
185	 14	70.5	11.9	 16
186	 14	298.8	32.9	 16
187	 14	81.3	13.4	 16
188	 14	80.5	16.5	 16
189	 14	128.0	17.5	 16
190	 14	98.3	17.5	 16
191	 14	94.8	17.4	 16
192	 14	57.0	12.7	 16
193	 14	63.5	9.4	 16
194	 14	78.3	14.3	 16
195	 14	117.0	19.9	 16
196	 14	160.5	26.2	 16
197	 14	57.5	7.8	 16
198	 14	93.3	17.5	 16
199	 14	90.5	12.3	 16
200	 14	135.3	17.0	 16
201	 14	57.5	13.4	 16
202	 14	56.0	7.6	 16
203	 14	70.3	13.7	 16
204	 14	48.3	8.0	 16
205	 14	58.5	14.2	 16
206	 14	63.0	10.4	 16
207	 14	54.5	10.9	 16
208	 14	48.8	9.2	 16
209	 14	60.0	18.5	 16
210	 14	78.5	11.6	 16
211	 14	58.3	11.1	 16
212	 14	612.3	88.9	 16
213	 14	67.8	12.4	 16
214	 14	61.3	11.4	 16
215	 14	61.5	8.0	 16
216	 14	62.0	12.3	 16
217	 14	59.5	10.9	 16
218	 14	57.5	11.0	 16
219	 14	50.3	8.6	 20
220	 14	81.5	15.5	 16
221	 14	108.0	11.3	 16
222	 14	133.0	29.2	 16
223	 14	286.8	25.3	 16
224	 14	86.8	15.0	 16
225	 14	72.0	16.8	 16
226	 14	69.5	9.8	 16
227	 14	71.0	12.7	 16
228	 14	107.5	17.0	 16
229	 14	77.5	13.9	 16
230	 14	65.8	12.8	 16
231	 14	145.0	31.3	 16
232	 14	143.3	23.0	 16
233	 14	218.3	32.0	 16
234	 14	116.0	15.1	 16
235	 14	626.3	86.1	 16
236	 14	190.8	26.5	 16
237	 14	4605.0	200.7	 16
238	 14	4909.0	408.4	 16
239	 14	585.0	82.8	 16
240	 14	118.5	20.1	 16
241	 14	884.8	76.4	 16
242	 14	1108.8	173.0	 16
243	 14	112.3	22.7	 16
244	 14	70.5	13.2	 16
245	 14	56.3	8.0	 16
246	 14	87.5	13.1	 16
247	 14	74.3	12.0	 16
248	 14	59.5	10.3	 16
249	 14	54.0	11.9	 16
250	 14	54.5	14.2	 16
251	 14	57.5	11.1	 16
252	 14	55.3	8.7	 16
253	 14	63.3	12.4	 16
254	 14	61.3	10.1	 16
255	 14	65.3	14.2	 16
256	 14	163.3	27.2	 16
257	 14	76.5	19.2	 16
258	 14	72.0	11.7	 16
259	 14	55.0	11.8	 16
260	 14	51.8	8.0	 16
261	 14	67.5	9.4	 16
262	 14	63.5	12.0	 16
263	 14	179.8	28.2	 16
264	 14	65.3	10.5	 16
265	 14	88.5	14.0	 16
266	 14	74.8	18.1	 16
267	 14	258.5	25.5	 16
268	 14	80.0	13.3	 16
269	 14	232.0	31.1	 16
270	 14	99.3	14.1	 16
271	 14	69.5	18.6	 16
272	 14	95.8	17.2	 16
273	 14	67.3	8.6	 16
274	 14	55.0	9.0	 16
275	 14	62.3	11.1	 16
276	 14	178.0	40.4	 16
277	 14	59.3	10.1	 16
278	 14	67.3	13.3	 16
279	 14	59.0	9.0	 16
280	 14	64.8	19.8	 16
281	 14	55.0	8.8	 16
282	 14	111.5	21.4	 16
283	 14	140.8	20.9	 16
284	 14	46.5	9.0	 16
285	 14	73.8	14.2	 16
286	 14	277.8	34.2	 16
287	 14	70.3	12.6	 16
288	 14	68.0	9.7	 16
289	 14	76.5	16.9	 16
290	 14	62.0	9.2	 16
291	 14	57.5	12.4	 16
292	 14	72.3	14.9	 16
293	 14	72.3	14.5	 16
294	 14	97.3	15.0	 16
295	 14	141.3	17.6	 16
296	 14	143.3	26.6	 16
297	 14	64.5	8.4	 16
298	 14	74.8	11.4	 16
299	 14	114.5	21.3	 16
300	 14	98.3	16.8	 16
301	 14	162.5	19.4	 16
302	 14	70.5	8.2	 16
303	 14	108.3	19.0	 16
304	 14	151.3	19.9	 16
305	 14	79.5	12.4	 16
306	 14	139.3	23.2	 16
307	 14	99.5	18.6	 16
308	 14	61.0	12.3	 16
309	 14	144.5	24.7	 16
310	 14	143.5	18.9	 16
311	 14	94.5	14.5	 16
312	 14	65.8	13.4	 16
313	 14	58.0	10.5	 16
314	 14	66.5	10.2	 16
315	 14	57.5	9.1	 16
316	 14	78.5	12.1	 16
317	 14	88.0	18.7	 16
318	 14	53.0	6.8	 16
319	 14	64.5	16.8	 16
320	 14	68.8	14.6	 16
321	 14	81.0	9.8	 16
322	 14	95.3	19.2	 16
323	 14	228.8	25.0	 16
324	 14	108.0	20.4	 16
325	 14	519.3	36.4	 16
326	 14	84.8	16.0	 16
327	 14	82.0	15.0	 16
328	 14	64.3	11.2	 16
329	 14	76.8	18.4	 16
330	 14	71.3	15.0	 16
331	 14	201.3	38.5	 16
332	 14	88.8	13.4	 16
333	 14	85.3	9.8	 16
334	 14	51.5	10.9	 16
335	 14	54.0	11.6	 16
336	 14	60.8	13.5	 16
337	 14	59.5	14.5	 20
338	 14	74.5	11.9	 16
339	 14	308.8	31.4	 16
340	 14	171.3	24.1	 16
341	 14	185.5	27.8	 16
342	 14	66.5	14.3	 16
343	 14	62.5	12.0	 16
344	 14	61.3	11.9	 16
345	 14	68.0	9.8	 16
346	 14	77.3	10.4	 16
347	 14	54.3	9.3	 16
348	 14	75.3	11.2	 16
349	 14	121.0	22.9	 16
350	 14	376.3	48.3	 16
351	 14	132.0	19.7	 16
352	 14	68.3	11.8	 16
353	 14	245.3	40.1	 16
354	 14	66.8	16.5	 16
355	 14	109.0	13.9	 16
356	 14	253.8	31.2	 16
357	 14	232.3	34.0	 16
358	 14	106.5	19.6	 16
359	 14	59.5	12.4	 16
360	 14	51.0	8.9	 16
361	 14	136.8	17.3	 16
362	 14	74.5	12.6	 16
363	 14	52.0	7.9	 16
364	 14	63.5	12.1	 16
365	 14	56.0	7.5	 16
366	 14	69.3	12.8	 16
367	 14	135.5	15.6	 16
368	 14	59.5	11.1	 16
369	 14	64.3	9.6	 16
370	 14	129.3	24.3	 16
371	 14	177.5	23.4	 16
372	 14	284.5	35.7	 16
373	 14	104.0	11.8	 16
374	 14	55.3	8.4	 16
375	 14	65.3	10.9	 16
376	 14	71.3	16.6	 16
377	 14	238.8	27.0	 16
378	 14	77.0	15.7	 16
379	 14	125.0	15.7	 16
380	 14	109.5	24.5	 16
381	 14	58.0	10.4	 16
382	 14	88.0	17.9	 16
383	 14	69.3	12.4	 16
384	 14	134.0	19.4	 16
385	 14	66.0	15.4	 16
386	 14	67.3	10.8	 16
387	 14	67.3	9.2	 16
388	 14	73.5	15.8	 16
389	 14	72.3	14.7	 16
390	 14	70.0	12.9	 16
391	 14	70.3	10.8	 16
392	 14	57.8	9.4	 16
393	 14	57.3	14.3	 16
394	 14	202.8	22.4	 16
395	 14	64.0	9.7	 16
396	 14	121.3	22.0	 16
397	 14	198.8	25.4	 16
398	 14	85.5	18.9	 16
399	 14	82.0	23.5	 16
400	 14	92.3	14.4	 16
401	 14	114.3	21.4	 16
402	 14	66.3	16.8	 16
403	 14	56.3	10.8	 16
404	 14	74.8	12.8	 16
405	 14	56.0	13.8	 16
406	 14	216.0	27.5	 16
407	 14	172.3	17.1	 16
408	 14	63.3	11.3	 16
409	 14	69.5	14.0	 16
410	 14	56.3	10.7	 16
411	 14	64.3	9.4	 16
412	 14	65.0	13.9	 16
413	 14	77.3	15.6	 16
414	 14	97.3	15.4	 16
415	 14	98.0	14.7	 16
416	 14	57.8	8.9	 16
417	 14	59.0	8.0	 16
418	 14	129.5	17.7	 16
419	 14	103.0	29.1	 16
420	 14	63.5	10.4	 16
421	 14	62.3	13.0	 16
422	 14	77.0	14.0	 16
423	 14	55.8	11.7	 16
424	 14	80.8	16.3	 16
425	 14	90.5	15.4	 16
426	 14	56.8	11.2	 16
427	 14	96.8	22.8	 16
428	 14	90.3	17.4	 16
429	 14	137.0	69.5	 16
430	 14	62.0	9.7	 16
431	 14	112.8	18.7	 16
432	 14	202.0	28.5	 16
433	 14	229.8	36.2	 16
434	 14	212.8	46.8	 16
435	 14	72.8	8.8	 16
436	 14	52.3	10.4	 16
437	 14	101.3	18.4	 16
438	 14	195.8	18.5	 16
439	 14	118.3	18.3	 16
440	 14	65.3	12.2	 16
441	 14	72.0	13.2	 16
442	 14	103.5	19.1	 16
443	 14	63.0	8.6	 16
444	 14	61.0	11.5	 16
445	 14	57.0	11.0	 16
446	 14	53.3	8.8	 16
447	 14	58.0	13.9	 16
448	 14	56.5	9.2	 16
449	 14	52.0	8.8	 16
450	 14	51.0	6.9	 16
451	 14	59.5	10.9	 16
452	 14	59.0	11.2	 16
453	 14	58.3	10.9	 16
454	 14	66.0	10.1	 16
455	 14	68.3	10.4	 16
456	 14	61.8	13.4	 20
457	 14	52.0	10.1	 16
458	 14	86.0	12.0	 16
459	 14	70.0	10.5	 16
460	 14	80.3	16.1	 16
461	 14	72.5	11.8	 16
462	 14	181.0	33.3	 16
463	 14	87.5	18.1	 16
464	 14	73.3	9.6	 16
465	 14	100.0	15.2	 16
466	 14	74.5	12.1	 16
467	 14	88.8	11.8	 16
468	 14	57.3	9.4	 16
469	 14	53.8	9.5	 16
470	 14	116.0	18.1	 16
471	 14	131.0	22.9	 16
472	 14	70.0	13.7	 16
473	 14	98.3	16.5	 16
474	 14	78.5	11.7	 16
475	 14	58.0	13.2	 16
476	 14	58.0	12.3	 16
477	 14	55.8	7.1	 16
478	 14	55.0	5.7	 16
479	 14	60.3	11.6	 16
480	 14	4692.3	474.9	 16
481	 14	157.8	24.5	 16
482	 14	63.3	12.1	 16
483	 14	53.3	11.7	 16
484	 14	51.3	9.0	 16
485	 14	168.0	21.2	 16
486	 14	151.5	28.4	 16
487	 14	184.5	33.7	 16
488	 14	91.8	17.8	 16
489	 14	72.8	14.9	 16
490	 14	61.0	11.1	 16
491	 14	72.3	13.8	 16
492	 14	64.0	12.7	 16
493	 14	53.0	10.3	 16
494	 14	60.0	8.6	 16
495	 14	132.5	20.7	 16
496	 14	75.5	14.6	 16
497	 14	48.3	7.7	 16
498	 14	53.3	10.5	 16
499	 14	162.5	15.5	 16
500	 14	63.8	10.9	 16
501	 14	54.0	9.9	 16
502	 14	51.5	7.5	 16
503	 14	57.3	9.8	 16
504	 14	60.5	9.8	 16
505	 14	53.3	8.3	 16
506	 14	123.0	19.4	 16
507	 14	67.5	15.2	 16
508	 14	239.3	56.6	 16
509	 14	103.3	11.7	 16
510	 14	83.3	13.2	 16
511	 14	88.3	15.7	 16
512	 14	68.0	11.2	 16
513	 14	88.0	18.3	 16
514	 14	129.0	18.2	 16
515	 14	122.3	16.9	 16
516	 14	122.0	19.7	 16
517	 14	55.0	10.9	 16
518	 14	65.0	10.1	 16
519	 14	76.3	10.2	 16
520	 14	62.3	10.5	 16
521	 14	87.5	13.8	 16
522	 14	173.3	23.3	 16
523	 14	161.5	21.0	 16
524	 14	109.0	19.6	 16
525	 14	57.3	9.6	 16
526	 14	56.5	8.5	 16
527	 14	56.3	8.8	 16
528	 14	127.8	13.4	 16
529	 14	100.3	12.6	 16
530	 14	65.0	8.0	 16
531	 14	63.8	14.0	 16
532	 14	74.3	15.9	 16
533	 14	51.8	9.5	 16
534	 14	66.3	15.3	 16
535	 14	117.5	23.6	 16
536	 14	58.3	7.6	 16
537	 14	103.3	15.8	 16
538	 14	140.5	22.1	 16
539	 14	89.3	15.6	 16
540	 14	65.0	11.7	 16
541	 14	107.3	12.0	 16
542	 14	52.3	9.1	 16
543	 14	90.5	13.9	 16
544	 14	80.3	12.4	 16
545	 14	56.3	9.6	 16
546	 14	64.3	9.7	 16
547	 14	343.5	37.6	 16
548	 14	371.0	38.8	 16
549	 14	202.8	19.0	 16
550	 14	60.0	7.7	 16
551	 14	85.0	14.0	 16
552	 14	93.5	13.4	 16
553	 14	827.3	83.5	 16
554	 14	54.3	9.1	 16
555	 14	51.0	9.9	 16
556	 14	93.5	20.3	 16
557	 14	71.3	9.3	 16
558	 14	65.3	14.7	 16
559	 14	193.3	25.0	 16
560	 14	83.5	12.9	 16
561	 14	56.0	9.0	 16
562	 14	87.3	15.2	 16
563	 14	231.8	44.2	 16
564	 14	172.3	22.7	 16
565	 14	67.5	10.0	 16
566	 14	84.5	12.6	 16
567	 14	560.0	90.6	 16
568	 14	82.8	15.8	 16
569	 14	88.5	13.8	 16
570	 14	52.8	11.1	 16
571	 14	50.8	8.9	 16
572	 14	54.0	9.6	 16
573	 14	79.0	12.2	 16
574	 14	78.3	10.2	 16
575	 14	143.0	30.2	 20
576	 14	75.3	10.2	 16
577	 14	64.0	12.8	 16
578	 14	424.3	39.4	 16
579	 14	531.0	47.4	 16
580	 14	76.5	11.7	 16
581	 14	61.0	8.3	 16
582	 14	155.0	26.3	 16
583	 14	72.0	14.1	 16
584	 14	218.3	23.9	 16
585	 14	70.3	9.9	 16
586	 14	86.3	18.8	 16
587	 14	110.0	13.3	 16
588	 14	55.3	10.7	 16
589	 14	62.3	10.0	 16
590	 14	68.8	18.3	 16
591	 14	91.0	14.9	 16
592	 14	322.8	73.8	 16
593	 14	82.8	10.6	 16
594	 14	128.5	17.1	 16
595	 14	76.5	11.8	 16
596	 14	56.0	10.7	 16
597	 14	317.3	33.9	 16
598	 14	57.5	9.5	 16
599	 14	72.5	14.7	 16
600	 14	71.3	10.8	 16
601	 14	90.0	13.7	 16
602	 14	145.5	17.5	 16
603	 14	58.3	10.2	 16
604	 14	103.5	17.3	 16
605	 14	64.8	13.2	 16
606	 14	65.8	15.0	 16
607	 14	53.3	9.6	 16
608	 14	59.8	13.2	 16
609	 14	59.8	12.4	 16
610	 14	53.8	11.3	 16
611	 14	55.8	9.2	 16
612	 14	62.0	9.0	 16
613	 14	72.3	14.9	 16
614	 14	70.5	16.1	 16
615	 14	90.8	12.5	 16
616	 14	145.5	21.0	 16
617	 14	96.8	18.6	 16
618	 14	74.8	11.7	 16
619	 14	135.0	28.5	 16
620	 14	56.5	10.8	 16
621	 14	58.0	11.9	 16
622	 14	73.3	11.9	 16
623	 14	74.5	15.4	 16
624	 14	66.0	12.4	 16
625	 14	56.0	10.0	 16
626	 14	57.5	11.2	 16
627	 14	50.5	8.2	 16
628	 14	55.0	8.4	 16
629	 14	86.5	22.4	 16
630	 14	519.0	83.0	 16
631	 14	441.3	61.6	 16
632	 14	75.5	12.5	 16
633	 14	250.3	22.9	 16
634	 14	661.3	50.0	 16
635	 14	99.3	15.4	 16
636	 14	118.8	34.4	 16
637	 14	55.3	13.1	 16
638	 14	107.0	17.0	 16
639	 14	84.3	17.0	 16
640	 14	77.8	13.0	 16
641	 14	80.0	17.3	 16
642	 14	80.3	11.1	 16
643	 14	111.8	22.4	 16
644	 14	102.5	11.6	 16
645	 14	94.3	12.2	 16
646	 14	99.3	17.1	 16
647	 14	112.0	18.2	 16
648	 14	81.3	12.3	 16
649	 14	74.0	12.2	 16
650	 14	55.5	8.8	 16
651	 14	59.3	9.8	 16
652	 14	77.5	15.7	 16
653	 14	65.0	16.6	 16
654	 14	61.3	14.5	 16
655	 14	53.8	8.4	 16
656	 14	59.5	10.9	 16
657	 14	53.3	10.5	 16
658	 14	131.0	20.4	 16
659	 14	133.5	16.3	 16
660	 14	1335.5	174.0	 16
661	 14	284.0	49.3	 16
662	 14	207.5	29.7	 16
663	 14	134.5	25.0	 16
664	 14	294.8	54.0	 16
665	 14	86.8	19.2	 16
666	 14	470.0	87.0	 16
667	 14	58.8	11.4	 16
668	 14	173.5	37.0	 16
669	 14	56.3	12.0	 16
670	 14	77.3	12.5	 16
671	 14	62.0	11.1	 16
672	 14	63.3	11.6	 16
673	 14	69.0	10.0	 16
674	 14	65.5	14.0	 16
675	 14	59.0	10.9	 16
676	 14	62.0	10.8	 16
677	 14	91.8	16.9	 16
678	 14	72.0	11.1	 16
679	 14	70.3	13.3	 16
680	 14	262.3	43.1	 16
681	 14	61.3	11.5	 16
682	 14	87.0	13.8	 16
683	 14	95.3	19.3	 16
684	 14	88.0	14.4	 16
685	 14	83.5	17.8	 16
686	 14	52.8	10.8	 16
687	 14	62.5	6.8	 16
688	 14	64.8	9.2	 16
689	 14	187.8	37.9	 16
690	 14	82.0	13.2	 16
691	 14	161.0	26.0	 16
692	 14	102.5	20.1	 16
693	 14	207.5	46.7	 20
694	 14	62.8	13.0	 16
695	 14	61.5	9.3	 16
696	 14	60.3	12.9	 16
697	 14	122.3	20.4	 16
698	 14	824.0	133.3	 16
699	 14	295.5	30.6	 16
700	 14	98.0	13.2	 16
701	 14	136.3	30.0	 16
702	 14	506.8	29.8	 16
703	 14	125.0	16.0	 16
704	 14	134.0	17.8	 16
705	 14	162.8	16.7	 16
706	 14	138.0	16.6	 16
707	 14	468.5	42.2	 16
708	 14	120.0	20.2	 16
709	 14	88.8	13.0	 16
710	 14	245.0	26.8	 16
711	 14	5724.8	565.2	 16
  0	 15	91.5	16.9	 16
  1	 15	119.8	20.3	 16
  2	 15	188.5	26.0	 16
  3	 15	106.0	19.7	 16
  4	 15	177.0	25.7	 16
  5	 15	75.5	13.4	 16
  6	 15	114.8	15.4	 16
  7	 15	680.5	72.5	 16
  8	 15	80.5	13.8	 16
  9	 15	123.0	25.2	 16
 10	 15	127.8	25.6	 16
 11	 15	86.0	17.3	 16
 12	 15	440.3	57.1	 16
 13	 15	69.8	18.0	 16
 14	 15	69.0	8.4	 16
 15	 15	98.8	17.8	 16
 16	 15	184.3	18.9	 16
 17	 15	195.8	25.8	 16
 18	 15	276.5	27.2	 16
 19	 15	667.3	80.1	 16
 20	 15	284.3	38.1	 16
 21	 15	80.0	11.6	 16
 22	 15	89.5	28.1	 16
 23	 15	224.5	25.7	 16
 24	 15	439.8	41.3	 16
 25	 15	126.0	21.3	 16
 26	 15	82.5	13.0	 16
 27	 15	59.3	12.3	 16
 28	 15	1616.3	161.1	 16
 29	 15	1082.8	98.0	 16
 30	 15	180.3	32.8	 16
 31	 15	486.0	41.7	 16
 32	 15	57.8	13.2	 16
 33	 15	1546.5	237.8	 16
 34	 15	94.8	17.0	 16
 35	 15	89.5	13.4	 16
 36	 15	56.3	11.1	 16
 37	 15	231.0	36.5	 16
 38	 15	80.8	8.7	 16
 39	 15	74.3	12.8	 16
 40	 15	66.0	9.8	 16
 41	 15	284.3	30.5	 16
 42	 15	80.5	11.9	 16
 43	 15	98.3	15.7	 16
 44	 15	119.3	12.5	 16
 45	 15	82.3	14.7	 16
 46	 15	117.0	16.2	 16
 47	 15	121.0	29.6	 16
 48	 15	1109.3	88.8	 16
 49	 15	313.3	32.1	 16
 50	 15	926.3	68.5	 16
 51	 15	187.5	24.0	 16
 52	 15	150.8	21.9	 16
 53	 15	174.8	18.9	 16
 54	 15	105.3	15.2	 16
 55	 15	95.3	18.7	 16
 56	 15	112.3	17.9	 16
 57	 15	95.5	14.9	 16
 58	 15	1614.5	177.1	 16
 59	 15	698.0	75.6	 16
 60	 15	101.3	22.7	 16
 61	 15	323.5	55.4	 16
 62	 15	281.3	39.3	 16
 63	 15	69.0	11.0	 16
 64	 15	174.3	22.8	 16
 65	 15	222.3	45.6	 16
 66	 15	86.3	16.1	 16
 67	 15	93.8	15.6	 16
 68	 15	420.0	29.4	 16
 69	 15	113.3	13.6	 16
 70	 15	295.0	37.0	 16
 71	 15	335.0	54.6	 16
 72	 15	116.3	20.1	 16
 73	 15	263.8	33.3	 16
 74	 15	756.5	50.9	 16
 75	 15	59.3	10.5	 16
 76	 15	1953.8	148.3	 16
 77	 15	81.5	12.4	 16
 78	 15	61.0	10.7	 16
 79	 15	323.3	49.8	 16
 80	 15	71.0	13.6	 16
 81	 15	185.3	25.8	 16
 82	 15	55.3	10.9	 16
 83	 15	64.0	8.1	 16
 84	 15	85.0	18.2	 16
 85	 15	1041.0	176.2	 16
 86	 15	481.8	87.8	 16
 87	 15	181.3	27.2	 16
 88	 15	92.0	16.5	 16
 89	 15	291.5	40.9	 16
 90	 15	171.8	30.6	 16
 91	 15	224.8	28.6	 16
 92	 15	336.5	38.9	 16
 93	 15	268.0	52.9	 16
 94	 15	1701.8	269.5	 16
 95	 15	533.0	78.0	 16
 96	 15	568.3	64.2	 16
 97	 15	65.5	11.4	 16
 98	 15	166.5	27.7	 16
 99	 15	139.0	26.2	 16
100	 15	89.0	10.4	 16
101	 15	5389.3	760.3	 16
102	 15	301.5	31.1	 16
103	 15	76.5	12.8	 20
104	 15	2422.5	319.0	 16
105	 15	330.3	39.9	 16
106	 15	101.5	15.5	 16
107	 15	54.3	7.5	 16
108	 15	127.8	24.1	 16
109	 15	329.3	106.1	 16
110	 15	75.0	16.1	 16
111	 15	157.0	19.2	 16
112	 15	127.0	19.9	 16
113	 15	81.0	15.4	 16
114	 15	181.3	27.0	 16
115	 15	347.8	46.8	 16
116	 15	176.8	33.0	 16
117	 15	82.8	20.7	 16
118	 15	276.5	35.1	 16
119	 15	72.5	13.0	 16
120	 15	377.3	55.1	 16
121	 15	212.3	23.8	 16
122	 15	77.0	16.2	 16
123	 15	227.3	31.2	 16
124	 15	112.3	23.1	 16
125	 15	86.0	13.2	 16
126	 15	474.5	64.8	 16
127	 15	63.5	10.3	 16
128	 15	65.8	12.3	 16
129	 15	57.3	10.7	 16
130	 15	64.5	9.8	 16
131	 15	1000.5	77.8	 16
132	 15	511.0	49.3	 16
133	 15	89.8	9.5	 16
134	 15	480.0	38.9	 16
135	 15	53.8	10.2	 16
136	 15	108.8	17.2	 16
137	 15	2970.0	382.4	 16
138	 15	1956.5	207.8	 16
139	 15	271.3	42.9	 16
140	 15	131.3	24.2	 16
141	 15	65.3	11.3	 16
142	 15	105.3	16.7	 16
143	 15	113.8	32.6	 16
144	 15	365.3	44.6	 16
145	 15	349.8	37.3	 16
146	 15	150.0	22.3	 16
147	 15	58.5	10.4	 16
148	 15	375.8	57.4	 16
149	 15	89.0	9.8	 16
150	 15	147.5	18.8	 16
151	 15	250.0	25.2	 16
152	 15	397.0	44.0	 16
153	 15	256.5	21.5	 16
154	 15	132.8	18.9	 16
155	 15	59.0	13.4	 16
156	 15	85.8	12.5	 16
157	 15	180.5	21.7	 16
158	 15	108.3	12.3	 16
159	 15	352.3	38.6	 16
160	 15	584.3	65.2	 16
161	 15	1815.0	169.7	 16
162	 15	86.5	13.6	 16
163	 15	98.3	15.2	 16
164	 15	48.3	6.6	 16
165	 15	74.0	11.0	 16
166	 15	91.5	17.6	 16
167	 15	275.3	37.7	 16
168	 15	347.0	77.4	 16
169	 15	134.3	19.8	 16
170	 15	114.5	18.2	 16
171	 15	71.0	11.4	 16
172	 15	68.3	13.9	 16
173	 15	78.5	8.7	 16
174	 15	51.3	7.3	 16
175	 15	105.3	21.3	 16
176	 15	67.5	10.2	 16
177	 15	115.0	20.6	 16
178	 15	419.0	47.5	 16
179	 15	110.5	14.3	 16
180	 15	101.3	16.3	 16
181	 15	93.8	15.8	 16
182	 15	502.0	57.4	 16
183	 15	91.5	16.3	 16
184	 15	68.8	11.7	 16
185	 15	83.5	17.9	 16
186	 15	100.5	12.9	 16
187	 15	69.0	15.6	 16
188	 15	629.3	59.9	 16
189	 15	303.5	29.0	 16
190	 15	509.0	68.8	 16
191	 15	66.5	9.6	 16
192	 15	118.0	21.5	 16
193	 15	112.5	21.3	 16
194	 15	204.5	30.3	 16
195	 15	124.5	16.9	 16
196	 15	85.3	21.7	 16
197	 15	327.3	70.8	 16
198	 15	57.5	8.4	 16
199	 15	51.8	7.7	 16
200	 15	58.0	12.3	 16
201	 15	572.5	74.6	 16
202	 15	136.3	19.7	 16
203	 15	151.3	18.8	 16
204	 15	67.3	15.8	 16
205	 15	290.0	47.2	 16
206	 15	412.8	61.6	 16
207	 15	86.5	17.2	 16
208	 15	150.8	21.5	 16
209	 15	108.3	16.5	 16
210	 15	121.3	18.6	 16
211	 15	151.3	32.2	 16
212	 15	115.8	17.0	 16
213	 15	64.3	11.9	 16
214	 15	257.8	39.6	 16
215	 15	134.5	30.7	 16
216	 15	2189.3	435.3	 16
217	 15	129.5	13.3	 16
218	 15	3643.8	603.1	 16
219	 15	855.3	144.5	 16
220	 15	165.5	34.3	 16
221	 15	247.5	34.0	 20
222	 15	104.3	22.2	 16
223	 15	108.8	18.0	 16
224	 15	57.5	7.3	 16
225	 15	86.0	13.2	 16
226	 15	177.8	26.9	 16
227	 15	58.3	12.1	 16
228	 15	70.3	12.8	 16
229	 15	401.5	44.7	 16
230	 15	114.3	20.6	 16
231	 15	60.8	12.1	 16
232	 15	241.8	37.9	 16
233	 15	56.5	13.7	 16
234	 15	88.3	18.8	 16
235	 15	361.3	25.9	 16
236	 15	625.0	38.4	 16
237	 15	330.5	30.3	 16
238	 15	1178.5	125.8	 16
239	 15	102.0	16.7	 16
240	 15	132.3	20.7	 16
241	 15	498.0	65.0	 16
242	 15	1078.3	128.0	 16
243	 15	67.0	14.3	 16
244	 15	82.0	13.0	 16
245	 15	200.3	32.7	 16
246	 15	238.5	43.2	 16
247	 15	75.5	12.9	 16
248	 15	539.0	124.8	 16
249	 15	1561.0	350.1	 16
250	 15	58.5	13.2	 16
251	 15	69.3	11.1	 16
252	 15	496.0	58.1	 16
253	 15	125.0	23.9	 16
254	 15	1027.0	102.1	 16
255	 15	137.0	15.4	 16
256	 15	119.0	14.4	 16
257	 15	506.3	62.1	 16
258	 15	65.3	7.7	 16
259	 15	55.0	8.0	 16
260	 15	213.5	33.8	 16
261	 15	82.5	14.3	 16
262	 15	132.8	18.2	 16
263	 15	142.8	26.4	 16
264	 15	324.0	45.0	 16
265	 15	101.3	16.9	 16
266	 15	58.3	9.9	 16
267	 15	86.0	12.7	 16
268	 15	114.0	12.5	 16
269	 15	337.5	39.8	 16
270	 15	67.0	12.0	 16
271	 15	65.0	11.2	 16
272	 15	179.5	25.3	 16
273	 15	65.0	14.0	 16
274	 15	238.0	35.6	 16
275	 15	245.0	48.1	 16
276	 15	406.8	76.9	 16
277	 15	91.3	14.0	 16
278	 15	65.5	10.8	 16
279	 15	421.0	43.6	 16
280	 15	836.8	52.6	 16
281	 15	74.0	13.8	 16
282	 15	452.0	40.5	 16
283	 15	60.3	8.5	 16
284	 15	79.3	12.0	 16
285	 15	111.3	20.4	 16
286	 15	105.3	15.1	 16
287	 15	309.5	42.0	 16
288	 15	1688.8	145.5	 16
289	 15	204.3	17.2	 16
290	 15	345.8	45.4	 16
291	 15	102.3	16.4	 16
292	 15	2324.5	265.3	 16
293	 15	612.5	62.2	 16
294	 15	93.3	12.8	 16
295	 15	74.0	10.7	 16
296	 15	440.3	68.9	 16
297	 15	1381.3	142.5	 16
298	 15	124.3	18.2	 16
299	 15	126.5	13.1	 16
300	 15	63.5	11.3	 16
301	 15	163.8	28.2	 16
302	 15	75.8	11.4	 16
303	 15	69.3	12.9	 16
304	 15	847.8	79.4	 16
305	 15	62.3	9.0	 16
306	 15	289.0	41.3	 16
307	 15	324.3	49.2	 16
308	 15	474.8	46.7	 16
309	 15	133.3	23.1	 16
310	 15	287.8	35.0	 16
311	 15	281.5	33.5	 16
312	 15	147.8	18.4	 16
313	 15	109.3	11.2	 16
314	 15	228.0	40.6	 16
315	 15	274.8	30.4	 16
316	 15	630.0	44.9	 16
317	 15	184.5	22.6	 16
318	 15	87.5	14.8	 16
319	 15	227.0	28.6	 16
320	 15	82.0	10.5	 16
321	 15	130.0	25.2	 16
322	 15	202.8	21.3	 16
323	 15	129.8	22.1	 16
324	 15	1096.5	142.3	 16
325	 15	107.8	31.2	 16
326	 15	147.8	25.4	 16
327	 15	191.3	43.0	 16
328	 15	59.0	10.4	 16
329	 15	53.3	11.5	 16
330	 15	1254.5	171.5	 16
331	 15	392.8	55.3	 16
332	 15	375.5	38.5	 16
333	 15	371.8	42.9	 16
334	 15	72.0	11.2	 16
335	 15	61.5	14.2	 16
336	 15	57.3	9.3	 16
337	 15	353.5	38.6	 16
338	 15	488.3	74.3	 16
339	 15	554.0	52.6	 16
340	 15	153.0	23.1	 20
341	 15	148.3	15.8	 16
342	 15	65.5	11.1	 16
343	 15	67.0	9.7	 16
344	 15	229.8	36.9	 16
345	 15	116.5	21.5	 16
346	 15	276.3	29.9	 16
347	 15	57.3	11.7	 16
348	 15	455.3	72.6	 16
349	 15	78.3	16.4	 16
350	 15	196.0	39.0	 16
351	 15	121.8	17.2	 16
352	 15	80.3	13.5	 16
353	 15	194.5	23.7	 16
354	 15	55.5	8.9	 16
355	 15	243.5	44.8	 16
356	 15	560.8	61.2	 16
357	 15	266.5	28.7	 16
358	 15	291.3	35.0	 16
359	 15	562.0	49.1	 16
360	 15	49.5	8.7	 16
361	 15	99.5	17.0	 16
362	 15	435.5	44.7	 16
363	 15	58.8	8.6	 16
364	 15	200.0	22.0	 16
365	 15	64.0	11.0	 16
366	 15	190.0	31.9	 16
367	 15	199.8	27.5	 16
368	 15	100.8	21.4	 16
369	 15	63.5	15.9	 16
370	 15	75.3	11.6	 16
371	 15	57.0	10.3	 16
372	 15	139.5	28.3	 16
373	 15	518.0	43.1	 16
374	 15	58.5	7.1	 16
375	 15	170.3	22.0	 16
376	 15	215.5	23.8	 16
377	 15	91.3	19.5	 16
378	 15	83.3	10.5	 16
379	 15	195.0	21.5	 16
380	 15	61.3	8.8	 16
381	 15	56.8	9.6	 16
382	 15	51.3	7.6	 16
383	 15	160.0	21.6	 16
384	 15	66.3	12.7	 16
385	 15	811.8	94.6	 16
386	 15	82.3	14.3	 16
387	 15	479.3	27.0	 16
388	 15	265.8	31.6	 16
389	 15	154.5	24.0	 16
390	 15	54.3	10.2	 16
391	 15	86.3	15.5	 16
392	 15	74.0	12.6	 16
393	 15	804.8	86.6	 16
394	 15	698.0	70.4	 16
395	 15	179.3	22.5	 16
396	 15	65.3	19.1	 16
397	 15	73.0	13.2	 16
398	 15	94.5	20.8	 16
399	 15	83.0	12.3	 16
400	 15	139.5	17.1	 16
401	 15	124.0	15.2	 16
402	 15	121.5	25.2	 16
403	 15	98.8	19.4	 16
404	 15	2111.3	369.9	 16
405	 15	208.5	22.4	 16
406	 15	103.5	18.2	 16
407	 15	1378.8	313.9	 16
408	 15	279.0	51.0	 16
409	 15	96.5	17.8	 16
410	 15	182.5	22.8	 16
411	 15	412.0	53.0	 16
412	 15	62.3	9.8	 16
413	 15	591.5	78.3	 16
414	 15	77.5	16.2	 16
415	 15	253.0	31.2	 16
416	 15	201.8	24.8	 16
417	 15	502.5	62.1	 16
418	 15	305.0	63.5	 16
419	 15	317.3	39.9	 16
420	 15	61.5	6.8	 16
421	 15	100.3	18.8	 16
422	 15	98.0	22.0	 16
423	 15	289.0	39.0	 16
424	 15	154.8	31.2	 16
425	 15	58.0	10.1	 16
426	 15	66.5	13.5	 16
427	 15	168.0	24.8	 16
428	 15	61.3	12.3	 16
429	 15	62.0	8.2	 16
430	 15	70.5	13.9	 16
431	 15	11182.3	2513.9	 16
432	 15	82.0	12.9	 16
433	 15	149.8	32.0	 16
434	 15	1011.5	252.4	 16
435	 15	487.8	39.8	 16
436	 15	115.5	16.3	 16
437	 15	274.5	37.8	 16
438	 15	175.3	29.9	 16
439	 15	156.5	23.5	 16
440	 15	9890.0	991.2	 16
441	 15	253.5	27.6	 16
442	 15	57.5	10.7	 16
443	 15	130.3	17.6	 16
444	 15	487.3	58.5	 16
445	 15	563.5	69.7	 16
446	 15	358.5	65.9	 16
447	 15	307.8	41.2	 16
448	 15	330.8	34.2	 16
449	 15	469.0	56.6	 16
450	 15	474.5	72.8	 16
451	 15	2293.3	440.2	 16
452	 15	73.0	10.7	 16
453	 15	356.0	61.0	 16
454	 15	933.0	165.2	 16
455	 15	87.5	19.8	 16
456	 15	54.0	12.8	 16
457	 15	255.8	61.6	 16
458	 15	502.8	92.6	 16
459	 15	88.8	14.5	 20
460	 15	79.5	18.0	 16
461	 15	114.0	11.0	 16
462	 15	83.0	11.2	 16
463	 15	57.3	6.3	 16
464	 15	204.8	37.1	 16
465	 15	56.5	10.4	 16
466	 15	149.8	23.6	 16
467	 15	217.8	29.8	 16
468	 15	215.5	36.5	 16
469	 15	546.0	60.8	 16
470	 15	79.3	10.6	 16
471	 15	410.0	60.0	 16
472	 15	85.3	17.1	 16
473	 15	155.8	17.3	 16
474	 15	145.5	21.2	 16
475	 15	112.8	12.5	 16
476	 15	76.8	16.5	 16
477	 15	220.8	38.8	 16
478	 15	968.3	133.1	 16
479	 15	131.0	21.8	 16
480	 15	93.0	15.0	 16
481	 15	555.0	121.1	 16
482	 15	68.0	12.0	 16
483	 15	55.8	10.8	 16
484	 15	69.5	13.9	 16
485	 15	61.5	11.4	 16
486	 15	163.3	37.7	 16
487	 15	96.3	13.9	 16
488	 15	152.5	23.5	 16
489	 15	95.0	15.8	 16
490	 15	109.8	17.4	 16
491	 15	66.5	14.8	 16
492	 15	723.0	70.6	 16
493	 15	110.5	19.4	 16
494	 15	59.5	11.6	 16
495	 15	84.3	14.9	 16
496	 15	524.3	86.0	 16
497	 15	57.0	10.7	 16
498	 15	60.8	11.9	 16
499	 15	80.3	12.3	 16
500	 15	60.3	9.1	 16
501	 15	74.3	12.9	 16
502	 15	110.3	16.4	 16
503	 15	672.5	105.6	 16
504	 15	167.8	38.4	 16
505	 15	396.3	50.0	 16
506	 15	77.5	15.6	 16
507	 15	994.5	200.3	 16
508	 15	140.0	20.0	 16
509	 15	69.0	9.5	 16
510	 15	81.0	16.1	 16
511	 15	144.0	25.2	 16
512	 15	58.5	9.2	 16
513	 15	85.3	18.2	 16
514	 15	64.0	13.5	 16
515	 15	133.8	24.6	 16
516	 15	110.5	17.3	 16
517	 15	358.3	49.0	 16
518	 15	85.3	14.9	 16
519	 15	163.0	25.9	 16
520	 15	52.8	13.7	 16
521	 15	73.8	13.5	 16
522	 15	139.8	20.5	 16
523	 15	370.5	46.9	 16
524	 15	50.5	8.8	 16
525	 15	366.0	36.6	 16
526	 15	268.3	53.1	 16
527	 15	80.3	13.9	 16
528	 15	198.0	32.2	 16
529	 15	193.8	35.8	 16
530	 15	298.0	63.4	 16
531	 15	194.0	31.6	 16
532	 15	57.5	10.6	 16
533	 15	58.5	12.0	 16
534	 15	74.3	13.8	 16
535	 15	684.3	123.3	 16
536	 15	194.8	47.7	 16
537	 15	322.5	58.8	 16
538	 15	189.3	28.3	 16
539	 15	107.3	19.9	 16
540	 15	2313.0	559.9	 16
541	 15	64.0	15.9	 16
542	 15	93.8	18.3	 16
543	 15	110.8	25.0	 16
544	 15	733.5	85.9	 16
545	 15	382.0	50.7	 16
546	 15	81.3	15.6	 16
547	 15	472.3	65.9	 16
548	 15	138.0	20.8	 16
549	 15	58.3	6.4	 16
550	 15	58.0	13.0	 16
551	 15	58.0	9.2	 16
552	 15	174.5	23.9	 16
553	 15	895.8	154.6	 16
554	 15	126.0	25.6	 16
555	 15	94.3	14.3	 16
556	 15	931.0	106.2	 16
557	 15	378.8	48.5	 16
558	 15	63.8	13.8	 16
559	 15	250.3	35.9	 16
560	 15	54.5	10.0	 16
561	 15	452.5	103.6	 16
562	 15	94.3	18.2	 16
563	 15	172.5	40.0	 16
564	 15	72.8	12.6	 16
565	 15	77.0	11.4	 16
566	 15	395.8	112.7	 16
567	 15	140.0	22.4	 16
568	 15	124.3	11.3	 16
569	 15	133.0	16.1	 16
570	 15	434.5	52.4	 16
571	 15	113.8	12.9	 16
572	 15	145.8	22.9	 16
573	 15	1658.8	368.9	 16
574	 15	62.5	8.3	 16
575	 15	63.0	12.3	 16
576	 15	287.3	65.8	 16
577	 15	518.5	100.1	 20
578	 15	89.5	18.1	 16
579	 15	94.5	16.3	 16
580	 15	404.8	51.1	 16
581	 15	79.5	12.1	 16
582	 15	85.8	19.3	 16
583	 15	109.0	17.8	 16
584	 15	105.3	17.2	 16
585	 15	138.5	28.0	 16
586	 15	1037.8	193.7	 16
587	 15	146.3	23.7	 16
588	 15	123.0	24.7	 16
589	 15	55.0	10.5	 16
590	 15	53.0	10.0	 16
591	 15	86.0	13.7	 16
592	 15	453.8	94.5	 16
593	 15	161.3	24.4	 16
594	 15	83.5	18.1	 16
595	 15	189.0	23.1	 16
596	 15	202.3	26.3	 16
597	 15	124.5	23.4	 16
598	 15	201.8	34.2	 16
599	 15	238.3	31.9	 16
600	 15	704.3	59.8	 16
601	 15	203.3	28.1	 16
602	 15	269.8	36.6	 16
603	 15	59.3	8.9	 16
604	 15	193.0	28.7	 16
605	 15	219.5	18.2	 16
606	 15	209.5	40.7	 16
607	 15	807.8	137.9	 16
608	 15	567.8	73.8	 16
609	 15	106.5	16.9	 16
610	 15	60.3	10.7	 16
611	 15	47.0	7.8	 16
612	 15	123.0	23.9	 16
613	 15	289.5	42.8	 16
614	 15	361.8	69.3	 16
615	 15	72.8	10.1	 16
616	 15	124.5	20.9	 16
617	 15	320.0	72.3	 16
618	 15	71.8	14.7	 16
619	 15	223.8	48.8	 16
620	 15	587.3	54.2	 16
621	 15	369.0	51.4	 16
622	 15	2263.3	160.4	 16
623	 15	628.5	47.2	 16
624	 15	72.8	14.7	 16
625	 15	362.0	37.2	 16
626	 15	70.5	13.8	 16
627	 15	95.8	12.0	 16
628	 15	115.3	15.2	 16
629	 15	98.3	13.9	 16
630	 15	232.3	36.2	 16
631	 15	116.3	18.6	 16
632	 15	193.5	29.2	 16
633	 15	387.8	43.3	 16
634	 15	405.8	37.0	 16
635	 15	197.3	40.4	 16
636	 15	257.3	30.6	 16
637	 15	198.0	30.8	 16
638	 15	449.0	64.3	 16
639	 15	112.3	17.1	 16
640	 15	236.3	43.6	 16
641	 15	188.5	19.8	 16
642	 15	109.0	20.1	 16
643	 15	497.0	114.8	 16
644	 15	140.3	25.7	 16
645	 15	142.5	24.1	 16
646	 15	227.0	28.4	 16
647	 15	93.3	12.4	 16
648	 15	517.3	53.5	 16
649	 15	194.8	26.6	 16
650	 15	57.3	11.3	 16
651	 15	52.0	6.3	 16
652	 15	58.0	8.7	 16
653	 15	203.0	32.7	 16
654	 15	57.5	9.7	 16
655	 15	50.0	7.9	 16
656	 15	3951.3	628.4	 16
657	 15	79.8	18.8	 16
658	 15	90.0	13.0	 16
659	 15	82.8	18.0	 16
660	 15	260.8	69.5	 16
661	 15	98.3	14.4	 16
662	 15	4697.3	828.8	 16
663	 15	76.0	12.3	 16
664	 15	84.8	13.9	 16
665	 15	352.5	58.5	 16
666	 15	53.3	11.8	 16
667	 15	48.0	8.2	 16
668	 15	143.0	25.4	 16
669	 15	73.5	12.2	 16
670	 15	86.5	16.0	 16
671	 15	379.8	80.4	 16
672	 15	97.8	13.4	 16
673	 15	405.5	76.0	 16
674	 15	101.5	16.1	 16
675	 15	4079.0	704.3	 16
676	 15	283.3	34.6	 16
677	 15	81.3	10.0	 16
678	 15	400.3	64.0	 16
679	 15	86.3	14.3	 16
680	 15	61.3	12.5	 16
681	 15	58.3	7.8	 16
682	 15	63.8	14.0	 16
683	 15	200.8	30.9	 16
684	 15	221.5	40.4	 16
685	 15	241.8	40.9	 16
686	 15	1392.5	249.7	 16
687	 15	99.8	12.6	 16
688	 15	238.5	47.4	 16
689	 15	66.5	11.2	 16
690	 15	673.0	153.6	 16
691	 15	98.3	14.7	 16
692	 15	6750.3	1503.5	 16
693	 15	73.3	31.9	 16
694	 15	250.8	57.7	 16
695	 15	75.5	11.3	 16
696	 15	73.5	15.6	 20
697	 15	137.8	32.3	 16
698	 15	135.3	25.3	 16
699	 15	126.3	20.9	 16
700	 15	81.8	14.7	 16
701	 15	232.0	33.4	 16
702	 15	244.8	24.2	 16
703	 15	60.8	8.4	 16
704	 15	343.3	32.8	 16
705	 15	415.0	44.5	 16
706	 15	94.0	19.5	 16
707	 15	125.5	22.3	 16
708	 15	725.3	55.5	 16
709	 15	61.5	18.2	 16
710	 15	3942.5	385.2	 16
711	 15	90.5	16.0	 16
  0	 16	7720.5	578.4	 16
  1	 16	75.3	14.0	 16
  2	 16	79.3	13.8	 16
  3	 16	68.3	13.3	 16
  4	 16	92.5	16.4	 16
  5	 16	89.5	11.4	 16
  6	 16	88.8	15.6	 16
  7	 16	113.8	18.7	 16
  8	 16	69.3	10.1	 16
  9	 16	72.5	9.3	 16
 10	 16	61.5	9.9	 16
 11	 16	65.0	16.1	 16
 12	 16	137.5	20.1	 16
 13	 16	64.5	13.1	 16
 14	 16	61.3	14.0	 16
 15	 16	55.0	10.5	 16
 16	 16	189.5	27.3	 16
 17	 16	133.8	20.6	 16
 18	 16	92.5	14.3	 16
 19	 16	193.5	28.8	 16
 20	 16	125.0	29.4	 16
 21	 16	57.0	8.4	 16
 22	 16	64.3	11.0	 16
 23	 16	65.5	13.4	 16
 24	 16	130.0	18.9	 16
 25	 16	74.3	13.1	 16
 26	 16	62.3	13.3	 16
 27	 16	62.0	10.5	 16
 28	 16	157.0	21.8	 16
 29	 16	162.8	26.1	 16
 30	 16	97.0	17.2	 16
 31	 16	155.3	21.6	 16
 32	 16	58.8	12.9	 16
 33	 16	94.5	17.9	 16
 34	 16	70.3	11.0	 16
 35	 16	109.0	23.8	 16
 36	 16	60.0	9.5	 16
 37	 16	65.8	18.7	 16
 38	 16	51.3	8.3	 16
 39	 16	52.5	13.8	 16
 40	 16	53.0	13.0	 16
 41	 16	86.3	10.4	 16
 42	 16	67.3	12.9	 16
 43	 16	92.0	18.0	 16
 44	 16	133.3	17.3	 16
 45	 16	106.3	13.9	 16
 46	 16	77.0	10.4	 16
 47	 16	94.3	12.3	 16
 48	 16	637.5	41.9	 16
 49	 16	141.3	18.9	 16
 50	 16	171.5	21.9	 16
 51	 16	245.5	23.5	 16
 52	 16	145.0	25.5	 16
 53	 16	83.5	15.5	 16
 54	 16	86.0	12.4	 16
 55	 16	83.0	14.1	 16
 56	 16	105.3	12.2	 16
 57	 16	91.5	19.8	 16
 58	 16	549.0	53.5	 16
 59	 16	117.8	19.7	 16
 60	 16	69.0	11.6	 16
 61	 16	75.5	11.4	 16
 62	 16	96.8	15.6	 16
 63	 16	54.5	8.1	 16
 64	 16	269.0	38.9	 16
 65	 16	94.8	23.1	 16
 66	 16	64.5	12.6	 16
 67	 16	130.0	23.4	 16
 68	 16	194.3	33.1	 16
 69	 16	208.3	20.2	 16
 70	 16	176.8	22.9	 16
 71	 16	124.5	19.7	 16
 72	 16	400.5	34.0	 16
 73	 16	292.0	34.8	 16
 74	 16	1597.8	85.7	 16
 75	 16	70.0	15.6	 16
 76	 16	595.5	42.7	 16
 77	 16	100.3	13.3	 16
 78	 16	62.8	11.4	 16
 79	 16	70.3	16.3	 16
 80	 16	55.0	10.7	 16
 81	 16	146.0	22.4	 16
 82	 16	51.5	10.3	 16
 83	 16	58.0	12.4	 16
 84	 16	57.8	12.5	 16
 85	 16	87.0	12.3	 16
 86	 16	89.0	15.1	 16
 87	 16	68.5	11.9	 16
 88	 16	67.3	7.3	 16
 89	 16	88.8	24.9	 16
 90	 16	95.0	13.9	 16
 91	 16	91.0	9.8	 16
 92	 16	110.0	17.6	 16
 93	 16	65.3	10.0	 16
 94	 16	102.3	16.8	 16
 95	 16	132.0	15.3	 16
 96	 16	172.8	25.9	 16
 97	 16	58.5	14.4	 16
 98	 16	78.3	13.8	 16
 99	 16	72.0	12.4	 16
100	 16	69.5	11.8	 16
101	 16	828.8	113.5	 16
102	 16	73.5	15.6	 16
103	 16	63.0	12.3	 16
104	 16	257.0	44.9	 16
105	 16	216.3	23.6	 16
106	 16	85.3	12.5	 20
107	 16	59.0	13.2	 16
108	 16	116.3	16.6	 16
109	 16	60.3	11.2	 16
110	 16	56.5	10.8	 16
111	 16	129.3	17.9	 16
112	 16	106.8	20.3	 16
113	 16	99.8	14.7	 16
114	 16	143.0	22.6	 16
115	 16	250.8	33.1	 16
116	 16	94.8	18.2	 16
117	 16	125.0	13.7	 16
118	 16	240.5	33.2	 16
119	 16	57.5	9.1	 16
120	 16	54.3	8.5	 16
121	 16	126.3	22.2	 16
122	 16	64.5	14.6	 16
123	 16	76.8	20.1	 16
124	 16	83.5	14.7	 16
125	 16	60.5	11.5	 16
126	 16	83.0	14.1	 16
127	 16	55.3	10.8	 16
128	 16	58.0	6.3	 16
129	 16	51.8	12.0	 16
130	 16	63.5	13.8	 16
131	 16	140.5	28.1	 16
132	 16	115.5	20.7	 16
133	 16	60.0	12.8	 16
134	 16	63.3	11.9	 16
135	 16	59.3	9.7	 16
136	 16	59.0	13.0	 16
137	 16	945.0	119.8	 16
138	 16	250.5	33.4	 16
139	 16	128.3	18.7	 16
140	 16	61.3	13.3	 16
141	 16	55.3	13.3	 16
142	 16	65.5	14.9	 16
143	 16	147.0	19.1	 16
144	 16	419.8	49.5	 16
145	 16	172.5	24.2	 16
146	 16	75.5	18.2	 16
147	 16	60.8	14.8	 16
148	 16	765.0	88.7	 16
149	 16	145.3	17.4	 16
150	 16	116.5	21.7	 16
151	 16	173.8	29.7	 16
152	 16	56.3	6.2	 16
153	 16	75.5	12.9	 16
154	 16	81.8	9.6	 16
155	 16	50.0	12.1	 16
156	 16	52.3	13.6	 16
157	 16	107.8	18.4	 16
158	 16	113.8	20.4	 16
159	 16	206.5	22.8	 16
160	 16	849.5	55.3	 16
161	 16	441.3	39.2	 16
162	 16	71.0	14.3	 16
163	 16	87.3	18.0	 16
164	 16	56.3	8.4	 16
165	 16	58.3	9.2	 16
166	 16	63.5	12.6	 16
167	 16	91.0	17.9	 16
168	 16	92.3	16.6	 16
169	 16	78.3	13.7	 16
170	 16	65.3	9.6	 16
171	 16	54.3	10.6	 16
172	 16	69.0	9.9	 16
173	 16	67.3	14.9	 16
174	 16	60.0	9.6	 16
175	 16	55.5	13.4	 16
176	 16	63.5	12.8	 16
177	 16	147.5	17.3	 16
178	 16	2019.0	111.8	 16
179	 16	122.3	22.6	 16
180	 16	67.3	8.7	 16
181	 16	157.8	22.8	 16
182	 16	237.8	23.7	 16
183	 16	170.0	20.0	 16
184	 16	113.5	19.8	 16
185	 16	68.3	13.7	 16
186	 16	61.5	7.7	 16
187	 16	55.5	12.1	 16
188	 16	185.5	22.2	 16
189	 16	154.8	16.7	 16
190	 16	164.8	22.4	 16
191	 16	59.0	9.6	 16
192	 16	94.0	11.9	 16
193	 16	83.5	10.7	 16
194	 16	160.0	21.2	 16
195	 16	107.0	22.6	 16
196	 16	70.3	12.3	 16
197	 16	65.3	10.0	 16
198	 16	51.0	8.1	 16
199	 16	52.5	7.8	 16
200	 16	57.3	10.0	 16
201	 16	86.3	15.8	 16
202	 16	185.0	14.4	 16
203	 16	83.3	13.5	 16
204	 16	70.8	12.2	 16
205	 16	165.5	27.8	 16
206	 16	107.3	18.4	 16
207	 16	65.8	13.1	 16
208	 16	103.0	16.6	 16
209	 16	97.0	12.0	 16
210	 16	60.3	9.7	 16
211	 16	53.5	9.0	 16
212	 16	61.5	6.4	 16
213	 16	51.3	8.4	 16
214	 16	63.3	11.3	 16
215	 16	61.3	10.1	 16
216	 16	403.5	73.0	 16
217	 16	103.3	17.7	 16
218	 16	406.0	64.9	 16
219	 16	271.8	34.8	 16
220	 16	102.8	21.2	 16
221	 16	109.3	15.5	 16
222	 16	129.0	14.0	 16
223	 16	75.0	16.3	 16
224	 16	54.5	9.7	 20
225	 16	63.5	11.9	 16
226	 16	77.0	11.7	 16
227	 16	66.5	12.0	 16
228	 16	55.3	7.8	 16
229	 16	557.3	78.0	 16
230	 16	72.5	9.9	 16
231	 16	61.5	8.9	 16
232	 16	57.5	9.9	 16
233	 16	54.0	10.6	 16
234	 16	293.3	50.3	 16
235	 16	397.8	53.3	 16
236	 16	490.0	37.4	 16
237	 16	181.3	28.0	 16
238	 16	102.8	17.4	 16
239	 16	137.0	20.5	 16
240	 16	94.8	18.7	 16
241	 16	102.3	23.1	 16
242	 16	154.3	27.4	 16
243	 16	70.5	12.0	 16
244	 16	69.0	13.4	 16
245	 16	103.5	20.9	 16
246	 16	82.3	15.3	 16
247	 16	73.8	14.6	 16
248	 16	76.8	12.0	 16
249	 16	511.3	95.5	 16
250	 16	67.3	14.9	 16
251	 16	74.3	14.3	 16
252	 16	71.0	16.3	 16
253	 16	100.3	26.0	 16
254	 16	1288.5	169.0	 16
255	 16	193.5	30.5	 16
256	 16	84.8	9.4	 16
257	 16	161.5	15.4	 16
258	 16	61.3	10.0	 16
259	 16	54.3	8.0	 16
260	 16	57.8	10.5	 16
261	 16	70.3	20.2	 16
262	 16	92.8	19.5	 16
263	 16	78.8	11.6	 16
264	 16	175.5	21.4	 16
265	 16	80.5	15.7	 16
266	 16	56.8	10.5	 16
267	 16	71.5	10.4	 16
268	 16	119.8	24.3	 16
269	 16	90.0	10.9	 16
270	 16	60.5	9.0	 16
271	 16	86.3	19.6	 16
272	 16	94.3	17.4	 16
273	 16	76.3	27.3	 16
274	 16	141.0	17.1	 16
275	 16	161.0	23.1	 16
276	 16	163.0	23.5	 16
277	 16	71.3	12.9	 16
278	 16	63.3	12.5	 16
279	 16	92.0	18.2	 16
280	 16	342.0	34.6	 16
281	 16	88.3	13.7	 16
282	 16	134.0	20.0	 16
283	 16	49.5	7.8	 16
284	 16	60.3	12.4	 16
285	 16	72.8	14.6	 16
286	 16	80.3	12.8	 16
287	 16	128.0	22.4	 16
288	 16	558.3	47.6	 16
289	 16	105.0	15.7	 16
290	 16	85.3	14.0	 16
291	 16	83.5	14.2	 16
292	 16	1297.0	88.7	 16
293	 16	195.0	24.9	 16
294	 16	83.3	8.6	 16
295	 16	58.8	11.8	 16
296	 16	92.8	17.3	 16
297	 16	521.5	46.9	 16
298	 16	83.3	14.3	 16
299	 16	84.5	9.0	 16
300	 16	72.0	16.0	 16
301	 16	83.3	10.5	 16
302	 16	63.3	11.0	 16
303	 16	63.0	14.5	 16
304	 16	128.0	28.2	 16
305	 16	62.3	10.1	 16
306	 16	114.5	15.7	 16
307	 16	112.3	14.5	 16
308	 16	131.5	19.7	 16
309	 16	85.5	11.1	 16
310	 16	834.0	55.2	 16
311	 16	227.3	25.8	 16
312	 16	134.8	25.7	 16
313	 16	63.3	8.2	 16
314	 16	61.3	12.3	 16
315	 16	106.0	19.1	 16
316	 16	482.5	49.9	 16
317	 16	182.0	31.1	 16
318	 16	91.8	14.0	 16
319	 16	166.5	22.6	 16
320	 16	88.0	10.5	 16
321	 16	138.0	22.2	 16
322	 16	172.8	21.0	 16
323	 16	69.5	15.3	 16
324	 16	165.3	27.9	 16
325	 16	188.0	23.6	 16
326	 16	111.5	17.6	 16
327	 16	113.8	16.4	 16
328	 16	68.5	15.1	 16
329	 16	55.5	8.3	 16
330	 16	127.5	14.1	 16
331	 16	68.3	14.0	 16
332	 16	126.8	13.6	 16
333	 16	281.8	33.2	 16
334	 16	68.0	10.6	 16
335	 16	58.0	10.1	 16
336	 16	69.0	12.5	 16
337	 16	224.8	33.0	 16
338	 16	128.8	20.8	 16
339	 16	134.5	19.4	 16
340	 16	69.8	13.6	 16
341	 16	64.0	11.0	 16
342	 16	80.5	18.0	 16
343	 16	55.3	6.3	 20
344	 16	73.0	10.8	 16
345	 16	63.8	9.0	 16
346	 16	140.5	21.2	 16
347	 16	47.0	7.1	 16
348	 16	77.3	18.9	 16
349	 16	53.3	11.6	 16
350	 16	81.3	20.6	 16
351	 16	91.3	11.1	 16
352	 16	60.3	9.5	 16
353	 16	97.3	12.9	 16
354	 16	55.5	11.3	 16
355	 16	115.8	36.3	 16
356	 16	264.5	26.4	 16
357	 16	122.0	16.0	 16
358	 16	118.3	20.6	 16
359	 16	174.0	22.1	 16
360	 16	60.3	7.9	 16
361	 16	79.5	11.8	 16
362	 16	100.3	19.0	 16
363	 16	59.3	10.6	 16
364	 16	82.0	12.7	 16
365	 16	66.8	10.5	 16
366	 16	107.5	15.7	 16
367	 16	126.5	15.3	 16
368	 16	57.5	11.9	 16
369	 16	49.0	5.9	 16
370	 16	54.5	7.3	 16
371	 16	62.8	11.5	 16
372	 16	90.3	10.8	 16
373	 16	140.5	22.5	 16
374	 16	56.3	8.8	 16
375	 16	235.5	27.5	 16
376	 16	102.5	12.4	 16
377	 16	78.0	14.1	 16
378	 16	64.5	10.6	 16
379	 16	195.3	29.6	 16
380	 16	55.8	8.9	 16
381	 16	53.3	10.2	 16
382	 16	55.3	9.8	 16
383	 16	73.8	15.5	 16
384	 16	60.3	12.4	 16
385	 16	202.3	29.8	 16
386	 16	103.3	20.3	 16
387	 16	270.5	35.1	 16
388	 16	211.8	19.7	 16
389	 16	113.5	15.3	 16
390	 16	59.5	11.3	 16
391	 16	68.0	10.0	 16
392	 16	64.5	14.6	 16
393	 16	142.8	24.0	 16
394	 16	195.5	29.8	 16
395	 16	102.5	16.4	 16
396	 16	81.8	16.8	 16
397	 16	61.0	10.2	 16
398	 16	63.3	9.7	 16
399	 16	65.5	9.3	 16
400	 16	109.5	11.6	 16
401	 16	71.3	9.2	 16
402	 16	112.3	20.0	 16
403	 16	84.5	11.9	 16
404	 16	408.0	112.2	 16
405	 16	378.8	40.3	 16
406	 16	100.3	16.4	 16
407	 16	174.8	39.7	 16
408	 16	147.5	26.5	 16
409	 16	63.0	12.6	 16
410	 16	105.3	17.6	 16
411	 16	60.0	9.8	 16
412	 16	60.3	15.4	 16
413	 16	81.3	12.6	 16
414	 16	62.3	8.7	 16
415	 16	89.3	15.3	 16
416	 16	139.5	22.2	 16
417	 16	138.5	22.2	 16
418	 16	116.5	19.4	 16
419	 16	113.3	15.8	 16
420	 16	54.3	11.5	 16
421	 16	57.0	12.0	 16
422	 16	61.3	10.6	 16
423	 16	134.3	14.6	 16
424	 16	68.3	13.0	 16
425	 16	57.0	8.4	 16
426	 16	58.3	11.1	 16
427	 16	129.0	24.4	 16
428	 16	55.0	9.7	 16
429	 16	63.8	8.6	 16
430	 16	57.3	6.7	 16
431	 16	4393.0	393.6	 16
432	 16	60.3	12.4	 16
433	 16	58.5	10.9	 16
434	 16	361.0	67.3	 16
435	 16	162.5	24.9	 16
436	 16	73.3	11.7	 16
437	 16	204.8	30.3	 16
438	 16	246.3	27.2	 16
439	 16	135.3	17.9	 16
440	 16	2286.0	268.2	 16
441	 16	389.5	44.3	 16
442	 16	63.3	10.3	 16
443	 16	55.0	5.3	 16
444	 16	168.3	27.3	 16
445	 16	430.0	33.4	 16
446	 16	212.0	51.0	 16
447	 16	199.8	27.7	 16
448	 16	189.0	28.6	 16
449	 16	155.0	20.8	 16
450	 16	188.0	30.6	 16
451	 16	736.5	90.6	 16
452	 16	105.3	15.5	 16
453	 16	188.5	24.3	 16
454	 16	211.0	24.1	 16
455	 16	60.8	11.9	 16
456	 16	51.0	8.1	 16
457	 16	118.3	16.0	 16
458	 16	285.5	49.4	 16
459	 16	76.5	10.8	 16
460	 16	103.8	15.2	 16
461	 16	158.3	24.8	 16
462	 16	118.8	17.0	 20
463	 16	69.8	10.0	 16
464	 16	81.3	12.3	 16
465	 16	62.5	11.0	 16
466	 16	64.0	8.8	 16
467	 16	77.8	11.7	 16
468	 16	102.5	14.5	 16
469	 16	150.5	23.5	 16
470	 16	284.5	44.7	 16
471	 16	132.0	24.3	 16
472	 16	98.5	17.2	 16
473	 16	84.0	18.9	 16
474	 16	77.8	13.8	 16
475	 16	153.5	25.9	 16
476	 16	51.3	9.6	 16
477	 16	110.3	16.3	 16
478	 16	226.0	30.7	 16
479	 16	112.5	18.2	 16
480	 16	62.0	13.0	 16
481	 16	102.3	21.4	 16
482	 16	59.3	11.6	 16
483	 16	47.5	6.8	 16
484	 16	69.8	13.1	 16
485	 16	66.0	9.5	 16
486	 16	95.5	21.5	 16
487	 16	77.8	14.1	 16
488	 16	77.5	12.5	 16
489	 16	91.5	16.6	 16
490	 16	91.0	20.1	 16
491	 16	57.0	14.9	 16
492	 16	149.5	17.6	 16
493	 16	149.3	18.9	 16
494	 16	54.5	7.4	 16
495	 16	63.5	14.9	 16
496	 16	65.0	7.5	 16
497	 16	57.0	8.1	 16
498	 16	64.5	13.0	 16
499	 16	56.5	7.6	 16
500	 16	58.5	10.6	 16
501	 16	233.5	27.3	 16
502	 16	74.8	15.3	 16
503	 16	153.0	19.7	 16
504	 16	56.3	12.2	 16
505	 16	118.3	21.5	 16
506	 16	58.0	8.9	 16
507	 16	154.0	25.1	 16
508	 16	122.5	23.6	 16
509	 16	114.3	19.7	 16
510	 16	97.5	13.6	 16
511	 16	66.3	16.5	 16
512	 16	51.3	10.7	 16
513	 16	65.5	11.7	 16
514	 16	88.3	20.0	 16
515	 16	64.3	10.6	 16
516	 16	70.5	13.9	 16
517	 16	50.3	5.5	 16
518	 16	63.0	13.3	 16
519	 16	56.8	8.1	 16
520	 16	57.0	16.1	 16
521	 16	54.0	13.0	 16
522	 16	92.3	16.1	 16
523	 16	77.5	18.2	 16
524	 16	48.0	7.1	 16
525	 16	107.5	20.5	 16
526	 16	67.5	8.8	 16
527	 16	159.8	16.2	 16
528	 16	74.3	10.1	 16
529	 16	54.8	6.1	 16
530	 16	165.0	15.4	 16
531	 16	322.3	30.2	 16
532	 16	49.0	9.0	 16
533	 16	58.5	13.0	 16
534	 16	74.5	17.0	 16
535	 16	188.8	21.9	 16
536	 16	69.3	13.3	 16
537	 16	156.5	22.7	 16
538	 16	290.0	36.0	 16
539	 16	102.5	16.5	 16
540	 16	493.3	109.7	 16
541	 16	60.5	10.6	 16
542	 16	63.3	8.6	 16
543	 16	62.5	12.2	 16
544	 16	149.8	28.6	 16
545	 16	161.5	23.1	 16
546	 16	50.5	8.1	 16
547	 16	161.0	27.1	 16
548	 16	98.8	15.1	 16
549	 16	61.0	10.3	 16
550	 16	87.0	39.1	 16
551	 16	54.8	9.4	 16
552	 16	70.3	12.4	 16
553	 16	107.3	14.1	 16
554	 16	377.3	56.1	 16
555	 16	106.3	15.6	 16
556	 16	507.3	39.1	 16
557	 16	136.0	17.8	 16
558	 16	54.5	7.4	 16
559	 16	82.0	20.1	 16
560	 16	59.0	13.8	 16
561	 16	81.5	11.1	 16
562	 16	91.3	14.7	 16
563	 16	75.5	14.4	 16
564	 16	66.0	16.3	 16
565	 16	78.5	10.0	 16
566	 16	80.5	18.1	 16
567	 16	150.3	21.2	 16
568	 16	121.5	16.9	 16
569	 16	137.3	16.9	 16
570	 16	150.5	26.5	 16
571	 16	82.3	13.5	 16
572	 16	105.3	17.8	 16
573	 16	101.5	20.7	 16
574	 16	53.3	7.8	 16
575	 16	51.8	10.8	 16
576	 16	91.5	15.1	 16
577	 16	292.5	60.9	 16
578	 16	66.8	13.7	 16
579	 16	66.5	10.6	 16
580	 16	169.3	23.2	 20
581	 16	79.8	15.8	 16
582	 16	83.0	13.6	 16
583	 16	111.5	16.7	 16
584	 16	116.0	24.2	 16
585	 16	132.8	17.8	 16
586	 16	171.3	13.8	 16
587	 16	89.0	9.8	 16
588	 16	96.0	13.9	 16
589	 16	52.0	9.1	 16
590	 16	58.0	15.5	 16
591	 16	68.0	11.9	 16
592	 16	104.5	16.4	 16
593	 16	160.3	23.3	 16
594	 16	105.0	13.4	 16
595	 16	256.3	29.0	 16
596	 16	119.8	18.8	 16
597	 16	86.3	17.5	 16
598	 16	65.0	10.3	 16
599	 16	122.3	21.5	 16
600	 16	220.0	37.0	 16
601	 16	126.5	16.4	 16
602	 16	129.0	19.9	 16
603	 16	52.3	10.5	 16
604	 16	74.3	13.8	 16
605	 16	136.3	22.5	 16
606	 16	66.3	15.4	 16
607	 16	127.8	26.9	 16
608	 16	107.5	18.6	 16
609	 16	86.0	10.6	 16
610	 16	55.5	11.1	 16
611	 16	65.3	13.2	 16
612	 16	66.3	11.0	 16
613	 16	86.8	19.0	 16
614	 16	77.8	10.7	 16
615	 16	59.0	6.9	 16
616	 16	82.3	13.5	 16
617	 16	211.0	31.9	 16
618	 16	78.8	14.0	 16
619	 16	156.0	29.4	 16
620	 16	191.3	24.1	 16
621	 16	75.0	12.2	 16
622	 16	542.5	30.3	 16
623	 16	653.3	46.8	 16
624	 16	73.3	12.2	 16
625	 16	421.5	41.7	 16
626	 16	85.0	11.1	 16
627	 16	75.5	14.9	 16
628	 16	120.3	18.0	 16
629	 16	89.0	16.7	 16
630	 16	257.3	39.4	 16
631	 16	156.3	23.4	 16
632	 16	85.0	11.5	 16
633	 16	226.0	24.0	 16
634	 16	255.5	44.6	 16
635	 16	240.3	27.7	 16
636	 16	112.8	15.3	 16
637	 16	96.5	20.8	 16
638	 16	240.0	32.2	 16
639	 16	102.8	15.0	 16
640	 16	109.3	12.8	 16
641	 16	270.3	32.2	 16
642	 16	156.0	31.8	 16
643	 16	86.8	17.7	 16
644	 16	206.5	28.0	 16
645	 16	84.3	16.7	 16
646	 16	90.0	17.2	 16
647	 16	82.3	12.6	 16
648	 16	160.0	28.2	 16
649	 16	83.5	16.1	 16
650	 16	62.0	11.7	 16
651	 16	55.3	13.1	 16
652	 16	54.3	6.6	 16
653	 16	110.3	19.1	 16
654	 16	63.5	13.9	 16
655	 16	50.5	9.4	 16
656	 16	512.0	96.2	 16
657	 16	93.3	14.3	 16
658	 16	63.5	11.8	 16
659	 16	58.0	6.9	 16
660	 16	131.3	20.8	 16
661	 16	83.5	15.6	 16
662	 16	1199.8	210.4	 16
663	 16	83.0	11.7	 16
664	 16	114.5	23.2	 16
665	 16	277.5	40.3	 16
666	 16	57.5	8.0	 16
667	 16	54.0	11.4	 16
668	 16	52.3	10.5	 16
669	 16	63.8	11.2	 16
670	 16	52.8	9.9	 16
671	 16	132.3	26.1	 16
672	 16	75.3	11.7	 16
673	 16	78.3	14.0	 16
674	 16	157.8	25.2	 16
675	 16	1008.0	185.0	 16
676	 16	110.3	21.4	 16
677	 16	68.0	13.1	 16
678	 16	136.3	24.5	 16
679	 16	82.8	19.0	 16
680	 16	52.5	12.6	 16
681	 16	63.5	13.4	 16
682	 16	62.8	14.3	 16
683	 16	121.5	19.3	 16
684	 16	80.0	15.0	 16
685	 16	99.0	16.9	 16
686	 16	138.8	18.6	 16
687	 16	142.8	19.1	 16
688	 16	71.3	9.4	 16
689	 16	55.5	10.7	 16
690	 16	106.5	24.1	 16
691	 16	74.3	8.1	 16
692	 16	1035.8	235.7	 16
693	 16	59.3	7.8	 16
694	 16	131.3	15.6	 16
695	 16	61.8	10.5	 16
696	 16	85.3	16.3	 16
697	 16	79.8	15.7	 16
698	 16	93.5	13.6	 16
699	 16	58.0	11.1	 20
700	 16	81.5	14.2	 16
701	 16	148.8	12.8	 16
702	 16	677.0	56.7	 16
703	 16	78.3	9.0	 16
704	 16	470.3	30.7	 16
705	 16	427.8	55.9	 16
706	 16	137.8	19.7	 16
707	 16	94.8	17.8	 16
708	 16	153.0	21.4	 16
709	 16	67.5	11.7	 16
710	 16	520.3	40.4	 16
711	 16	5330.5	430.9	 16
  0	 17	99.8	15.7	 16
  1	 17	91.8	15.6	 16
  2	 17	78.3	12.9	 16
  3	 17	1752.0	113.8	 16
  4	 17	192.3	23.0	 16
  5	 17	165.8	25.5	 16
  6	 17	159.5	28.3	 16
  7	 17	87.0	17.8	 16
  8	 17	513.3	68.6	 16
  9	 17	377.3	38.4	 16
 10	 17	57.5	7.9	 16
 11	 17	53.5	6.8	 16
 12	 17	93.5	19.3	 16
 13	 17	59.3	10.1	 16
 14	 17	124.3	26.0	 16
 15	 17	96.0	17.7	 16
 16	 17	151.0	22.7	 16
 17	 17	82.5	11.4	 16
 18	 17	2057.0	88.8	 16
 19	 17	114.5	23.9	 16
 20	 17	250.0	31.7	 16
 21	 17	68.5	8.3	 16
 22	 17	94.3	17.1	 16
 23	 17	60.5	10.4	 16
 24	 17	221.8	20.7	 16
 25	 17	86.8	14.1	 16
 26	 17	83.3	14.5	 16
 27	 17	53.0	10.3	 16
 28	 17	506.3	66.9	 16
 29	 17	62.3	10.5	 16
 30	 17	53.3	9.6	 16
 31	 17	71.3	11.1	 16
 32	 17	58.3	10.7	 16
 33	 17	53.5	10.7	 16
 34	 17	180.0	21.7	 16
 35	 17	308.3	48.3	 16
 36	 17	73.0	16.6	 16
 37	 17	212.8	41.8	 16
 38	 17	82.0	11.9	 16
 39	 17	456.3	98.5	 16
 40	 17	60.8	12.5	 16
 41	 17	74.8	12.8	 16
 42	 17	54.8	11.1	 16
 43	 17	96.0	14.9	 16
 44	 17	322.5	47.2	 16
 45	 17	329.0	26.8	 16
 46	 17	195.3	21.6	 16
 47	 17	419.0	47.6	 16
 48	 17	106.8	18.7	 16
 49	 17	141.0	23.1	 16
 50	 17	169.0	28.8	 16
 51	 17	188.8	29.4	 16
 52	 17	115.5	16.3	 16
 53	 17	56.3	9.3	 16
 54	 17	71.3	13.5	 16
 55	 17	74.5	12.8	 16
 56	 17	1835.5	243.9	 16
 57	 17	324.5	61.6	 16
 58	 17	74.8	13.5	 16
 59	 17	126.8	24.9	 16
 60	 17	116.5	11.5	 16
 61	 17	284.3	49.3	 16
 62	 17	100.5	15.4	 16
 63	 17	2090.8	390.5	 16
 64	 17	137.8	18.6	 16
 65	 17	94.3	27.3	 16
 66	 17	68.0	10.3	 16
 67	 17	312.5	35.0	 16
 68	 17	461.0	55.3	 16
 69	 17	597.3	30.6	 16
 70	 17	621.5	88.1	 16
 71	 17	553.3	70.6	 16
 72	 17	191.3	22.5	 16
 73	 17	65.5	9.0	 16
 74	 17	303.3	36.0	 16
 75	 17	157.5	16.3	 16
 76	 17	375.0	42.3	 16
 77	 17	333.0	46.6	 16
 78	 17	1387.5	184.6	 16
 79	 17	97.0	12.8	 16
 80	 17	121.3	17.5	 16
 81	 17	68.5	11.3	 16
 82	 17	65.0	10.3	 16
 83	 17	354.5	66.7	 16
 84	 17	54.0	10.3	 16
 85	 17	55.8	8.1	 16
 86	 17	62.0	17.3	 16
 87	 17	87.0	11.9	 16
 88	 17	679.3	131.6	 16
 89	 17	1631.8	270.7	 16
 90	 17	258.0	41.7	 16
 91	 17	366.5	71.8	 16
 92	 17	172.8	27.5	 16
 93	 17	184.3	24.3	 16
 94	 17	60.5	11.1	 16
 95	 17	131.5	18.6	 16
 96	 17	748.0	81.1	 16
 97	 17	3119.0	390.0	 16
 98	 17	174.3	23.0	 16
 99	 17	1235.0	174.6	 16
100	 17	1337.0	147.1	 16
101	 17	203.0	28.9	 16
102	 17	79.8	10.6	 16
103	 17	70.5	19.6	 16
104	 17	63.3	15.2	 16
105	 17	369.5	48.8	 16
106	 17	58.5	10.7	 16
107	 17	55.5	9.3	 16
108	 17	83.3	14.4	 20
109	 17	111.8	14.5	 16
110	 17	633.3	127.7	 16
111	 17	234.0	35.4	 16
112	 17	152.3	26.0	 16
113	 17	626.8	125.2	 16
114	 17	130.3	22.4	 16
115	 17	414.3	91.6	 16
116	 17	125.3	18.9	 16
117	 17	140.0	20.2	 16
118	 17	202.0	27.1	 16
119	 17	212.5	19.9	 16
120	 17	66.3	10.6	 16
121	 17	57.3	10.5	 16
122	 17	202.3	29.2	 16
123	 17	62.3	9.2	 16
124	 17	374.8	47.3	 16
125	 17	166.3	23.9	 16
126	 17	174.0	21.9	 16
127	 17	153.0	28.2	 16
128	 17	53.3	12.0	 16
129	 17	238.8	48.2	 16
130	 17	50.8	9.8	 16
131	 17	172.3	25.8	 16
132	 17	88.3	15.7	 16
133	 17	91.5	13.5	 16
134	 17	80.0	11.6	 16
135	 17	83.5	12.3	 16
136	 17	84.5	17.9	 16
137	 17	252.8	36.2	 16
138	 17	68.0	10.9	 16
139	 17	100.8	19.8	 16
140	 17	182.8	39.4	 16
141	 17	56.0	10.0	 16
142	 17	696.5	153.2	 16
143	 17	212.8	41.7	 16
144	 17	72.3	16.3	 16
145	 17	71.5	12.0	 16
146	 17	91.5	18.8	 16
147	 17	55.8	9.5	 16
148	 17	153.5	28.2	 16
149	 17	59.0	9.4	 16
150	 17	55.3	8.6	 16
151	 17	59.5	10.2	 16
152	 17	131.3	20.8	 16
153	 17	79.8	14.0	 16
154	 17	326.5	47.7	 16
155	 17	56.3	10.3	 16
156	 17	70.3	11.2	 16
157	 17	936.3	94.2	 16
158	 17	145.5	21.1	 16
159	 17	355.3	29.1	 16
160	 17	206.5	28.4	 16
161	 17	175.3	31.0	 16
162	 17	154.5	19.2	 16
163	 17	79.0	16.7	 16
164	 17	117.5	21.9	 16
165	 17	54.3	8.4	 16
166	 17	89.0	18.7	 16
167	 17	78.3	22.0	 16
168	 17	390.5	75.6	 16
169	 17	320.3	56.2	 16
170	 17	977.3	187.5	 16
171	 17	98.3	20.1	 16
172	 17	513.8	41.6	 16
173	 17	167.8	30.1	 16
174	 17	380.5	57.0	 16
175	 17	152.3	21.8	 16
176	 17	436.0	38.5	 16
177	 17	306.8	30.0	 16
178	 17	707.3	61.7	 16
179	 17	310.5	38.2	 16
180	 17	173.8	27.1	 16
181	 17	134.3	27.0	 16
182	 17	82.3	16.4	 16
183	 17	187.3	34.0	 16
184	 17	61.0	9.8	 16
185	 17	88.8	18.1	 16
186	 17	298.3	54.2	 16
187	 17	2021.5	290.7	 16
188	 17	56.0	9.2	 16
189	 17	93.0	14.5	 16
190	 17	71.0	17.3	 16
191	 17	185.5	33.8	 16
192	 17	72.8	14.0	 16
193	 17	203.5	29.0	 16
194	 17	2651.5	332.6	 16
195	 17	141.3	20.4	 16
196	 17	107.0	16.2	 16
197	 17	50.5	10.8	 16
198	 17	591.8	77.4	 16
199	 17	486.0	56.1	 16
200	 17	704.0	72.9	 16
201	 17	72.5	11.3	 16
202	 17	470.0	48.1	 16
203	 17	145.5	22.9	 16
204	 17	83.0	16.9	 16
205	 17	63.0	10.1	 16
206	 17	76.3	11.1	 16
207	 17	112.5	24.2	 16
208	 17	133.8	22.0	 16
209	 17	66.3	11.3	 16
210	 17	225.8	40.7	 16
211	 17	55.0	9.3	 16
212	 17	758.5	132.2	 16
213	 17	197.0	31.1	 16
214	 17	120.5	22.7	 16
215	 17	65.3	9.9	 16
216	 17	94.0	12.4	 16
217	 17	176.5	32.0	 16
218	 17	63.3	16.9	 16
219	 17	58.8	9.6	 16
220	 17	132.5	29.5	 16
221	 17	58.5	9.5	 16
222	 17	58.5	13.9	 16
223	 17	55.3	7.6	 16
224	 17	269.0	45.9	 16
225	 17	58.3	11.2	 16
226	 17	63.3	11.7	 16
227	 17	58.0	9.2	 20
228	 17	353.5	45.0	 16
229	 17	322.5	51.7	 16
230	 17	77.0	20.7	 16
231	 17	479.3	46.6	 16
232	 17	112.3	22.2	 16
233	 17	1274.0	194.2	 16
234	 17	439.8	43.4	 16
235	 17	195.3	30.1	 16
236	 17	69.3	17.5	 16
237	 17	149.3	17.2	 16
238	 17	46.3	8.6	 16
239	 17	152.5	21.5	 16
240	 17	74.0	11.7	 16
241	 17	593.0	109.7	 16
242	 17	231.3	36.1	 16
243	 17	424.5	70.3	 16
244	 17	95.5	19.4	 16
245	 17	897.3	203.4	 16
246	 17	202.0	47.4	 16
247	 17	93.5	12.9	 16
248	 17	76.8	16.9	 16
249	 17	145.3	26.3	 16
250	 17	565.5	110.1	 16
251	 17	586.3	106.3	 16
252	 17	221.0	29.9	 16
253	 17	775.8	158.9	 16
254	 17	166.5	23.6	 16
255	 17	57.8	10.8	 16
256	 17	162.8	20.7	 16
257	 17	106.8	15.0	 16
258	 17	270.8	27.8	 16
259	 17	250.8	50.7	 16
260	 17	216.8	25.7	 16
261	 17	488.0	56.4	 16
262	 17	92.0	15.1	 16
263	 17	56.5	6.6	 16
264	 17	85.3	14.8	 16
265	 17	83.0	10.3	 16
266	 17	114.3	24.7	 16
267	 17	61.5	10.3	 16
268	 17	183.3	40.2	 16
269	 17	417.5	64.0	 16
270	 17	196.8	33.0	 16
271	 17	429.5	99.1	 16
272	 17	464.0	108.8	 16
273	 17	214.3	47.1	 16
274	 17	69.5	23.8	 16
275	 17	702.5	196.2	 16
276	 17	123.0	28.4	 16
277	 17	409.8	52.4	 16
278	 17	196.5	30.6	 16
279	 17	113.8	17.2	 16
280	 17	63.5	12.2	 16
281	 17	72.3	12.9	 16
282	 17	109.5	14.5	 16
283	 17	71.0	14.2	 16
284	 17	74.3	10.7	 16
285	 17	56.3	11.2	 16
286	 17	64.0	12.8	 16
287	 17	92.5	12.5	 16
288	 17	113.5	18.3	 16
289	 17	79.0	16.9	 16
290	 17	160.5	27.8	 16
291	 17	81.5	12.7	 16
292	 17	106.3	18.1	 16
293	 17	79.0	11.5	 16
294	 17	48.0	5.0	 16
295	 17	96.5	19.9	 16
296	 17	55.3	9.5	 16
297	 17	61.0	11.9	 16
298	 17	144.0	31.5	 16
299	 17	75.5	12.4	 16
300	 17	448.0	100.0	 16
301	 17	178.3	33.7	 16
302	 17	590.8	158.8	 16
303	 17	335.8	39.0	 16
304	 17	103.3	20.6	 16
305	 17	294.8	29.7	 16
306	 17	264.5	24.6	 16
307	 17	8458.8	572.4	 16
308	 17	9170.5	217.8	 16
309	 17	9262.5	262.5	 16
310	 17	128.5	25.8	 16
311	 17	86.8	17.9	 16
312	 17	116.3	22.2	 16
313	 17	378.3	39.7	 16
314	 17	180.5	19.1	 16
315	 17	101.3	13.7	 16
316	 17	688.0	35.1	 16
317	 17	83.8	17.1	 16
318	 17	230.5	36.6	 16
319	 17	56.3	11.4	 16
320	 17	136.0	19.3	 16
321	 17	80.5	11.9	 16
322	 17	219.0	38.1	 16
323	 17	75.3	13.1	 16
324	 17	74.0	14.7	 16
325	 17	62.8	12.6	 16
326	 17	72.5	17.2	 16
327	 17	162.0	33.9	 16
328	 17	57.3	8.1	 16
329	 17	67.5	11.7	 16
330	 17	733.3	103.0	 16
331	 17	146.0	25.3	 16
332	 17	961.0	129.1	 16
333	 17	351.0	60.1	 16
334	 17	66.5	8.2	 16
335	 17	758.5	95.6	 16
336	 17	203.0	25.5	 16
337	 17	130.5	19.9	 16
338	 17	229.3	32.5	 16
339	 17	3279.8	472.8	 16
340	 17	69.5	10.4	 16
341	 17	62.3	13.4	 16
342	 17	408.8	68.4	 16
343	 17	94.3	13.2	 16
344	 17	196.3	27.3	 16
345	 17	205.5	28.4	 16
346	 17	239.3	39.1	 20
347	 17	99.5	14.5	 16
348	 17	220.0	27.8	 16
349	 17	87.3	13.4	 16
350	 17	69.3	10.7	 16
351	 17	134.5	16.2	 16
352	 17	1926.0	254.5	 16
353	 17	53.8	9.0	 16
354	 17	132.3	20.8	 16
355	 17	114.8	22.1	 16
356	 17	363.5	43.6	 16
357	 17	112.0	20.3	 16
358	 17	112.5	17.5	 16
359	 17	79.5	15.8	 16
360	 17	75.3	12.0	 16
361	 17	111.8	20.8	 16
362	 17	166.5	27.6	 16
363	 17	111.5	14.3	 16
364	 17	107.5	17.3	 16
365	 17	641.0	69.1	 16
366	 17	317.3	39.8	 16
367	 17	71.0	12.4	 16
368	 17	70.0	9.7	 16
369	 17	442.3	56.6	 16
370	 17	126.0	20.7	 16
371	 17	57.3	8.9	 16
372	 17	73.3	13.0	 16
373	 17	95.5	17.6	 16
374	 17	69.0	13.5	 16
375	 17	87.3	13.9	 16
376	 17	484.3	84.7	 16
377	 17	149.3	23.5	 16
378	 17	138.8	27.8	 16
379	 17	71.3	14.2	 16
380	 17	65.3	7.9	 16
381	 17	90.8	12.6	 16
382	 17	63.8	8.3	 16
383	 17	131.3	18.8	 16
384	 17	121.3	21.8	 16
385	 17	325.5	37.0	 16
386	 17	132.0	19.2	 16
387	 17	449.5	48.9	 16
388	 17	54.0	9.5	 16
389	 17	103.8	15.7	 16
390	 17	62.0	11.6	 16
391	 17	125.3	23.9	 16
392	 17	101.8	14.8	 16
393	 17	66.8	14.6	 16
394	 17	113.0	16.9	 16
395	 17	256.5	21.3	 16
396	 17	85.3	15.2	 16
397	 17	54.3	9.5	 16
398	 17	76.8	10.5	 16
399	 17	166.3	19.0	 16
400	 17	100.5	12.2	 16
401	 17	67.0	11.3	 16
402	 17	155.5	19.0	 16
403	 17	136.0	24.7	 16
404	 17	109.8	12.3	 16
405	 17	87.3	18.0	 16
406	 17	113.3	21.2	 16
407	 17	593.0	112.6	 16
408	 17	52.0	8.8	 16
409	 17	60.0	7.7	 16
410	 17	55.3	11.1	 16
411	 17	94.3	19.8	 16
412	 17	99.0	15.4	 16
413	 17	77.0	11.7	 16
414	 17	125.8	19.8	 16
415	 17	132.0	15.5	 16
416	 17	46.8	7.6	 16
417	 17	115.3	20.7	 16
418	 17	573.8	55.1	 16
419	 17	58.3	11.1	 16
420	 17	592.8	73.6	 16
421	 17	79.0	11.7	 16
422	 17	83.3	11.6	 16
423	 17	135.0	18.5	 16
424	 17	112.3	17.8	 16
425	 17	137.5	20.0	 16
426	 17	297.0	31.6	 16
427	 17	208.8	31.4	 16
428	 17	56.5	8.1	 16
429	 17	53.3	11.5	 16
430	 17	473.0	70.7	 16
431	 17	165.3	20.4	 16
432	 17	268.0	52.4	 16
433	 17	49.5	10.3	 16
434	 17	336.0	74.3	 16
435	 17	76.0	16.4	 16
436	 17	179.8	32.0	 16
437	 17	219.0	33.3	 16
438	 17	201.5	27.3	 16
439	 17	52.5	11.5	 16
440	 17	411.0	78.2	 16
441	 17	391.8	38.4	 16
442	 17	178.3	29.5	 16
443	 17	214.5	19.1	 16
444	 17	297.0	48.0	 16
445	 17	81.5	13.1	 16
446	 17	88.3	14.4	 16
447	 17	167.3	22.5	 16
448	 17	69.3	12.5	 16
449	 17	61.0	10.1	 16
450	 17	76.0	7.5	 16
451	 17	60.3	7.8	 16
452	 17	317.5	34.5	 16
453	 17	97.3	13.7	 16
454	 17	75.3	15.0	 16
455	 17	107.3	18.0	 16
456	 17	241.5	46.9	 16
457	 17	69.3	12.0	 16
458	 17	59.0	12.1	 16
459	 17	106.5	17.1	 16
460	 17	533.3	124.2	 16
461	 17	122.3	13.5	 16
462	 17	227.3	21.6	 16
463	 17	147.0	14.2	 16
464	 17	1953.0	322.9	 20
465	 17	658.3	102.1	 16
466	 17	56.3	10.7	 16
467	 17	127.5	19.6	 16
468	 17	87.3	20.4	 16
469	 17	112.8	18.5	 16
470	 17	134.5	19.4	 16
471	 17	60.0	10.4	 16
472	 17	117.0	23.6	 16
473	 17	65.5	7.8	 16
474	 17	139.3	15.7	 16
475	 17	236.3	34.5	 16
476	 17	82.8	14.6	 16
477	 17	56.3	8.7	 16
478	 17	232.5	32.5	 16
479	 17	562.5	75.8	 16
480	 17	119.5	20.5	 16
481	 17	65.5	12.1	 16
482	 17	361.3	57.5	 16
483	 17	427.3	74.0	 16
484	 17	102.3	22.2	 16
485	 17	191.5	30.9	 16
486	 17	78.3	15.3	 16
487	 17	180.5	27.7	 16
488	 17	58.5	8.0	 16
489	 17	85.8	13.6	 16
490	 17	73.5	13.8	 16
491	 17	150.8	21.9	 16
492	 17	59.5	9.9	 16
493	 17	131.3	20.5	 16
494	 17	1201.8	141.9	 16
495	 17	360.5	40.6	 16
496	 17	171.0	23.7	 16
497	 17	246.0	36.2	 16
498	 17	125.0	15.4	 16
499	 17	58.8	8.8	 16
500	 17	93.5	12.5	 16
501	 17	518.5	70.9	 16
502	 17	101.0	17.5	 16
503	 17	154.8	23.5	 16
504	 17	76.8	16.2	 16
505	 17	54.0	6.7	 16
506	 17	56.8	10.9	 16
507	 17	58.3	9.5	 16
508	 17	60.0	12.4	 16
509	 17	63.5	10.6	 16
510	 17	190.3	28.4	 16
511	 17	200.8	27.1	 16
512	 17	67.0	13.1	 16
513	 17	59.0	9.9	 16
514	 17	56.8	9.2	 16
515	 17	491.3	36.0	 16
516	 17	112.3	21.7	 16
517	 17	157.0	21.1	 16
518	 17	250.5	22.6	 16
519	 17	79.8	15.6	 16
520	 17	87.8	17.1	 16
521	 17	128.0	22.0	 16
522	 17	65.3	16.2	 16
523	 17	277.5	31.1	 16
524	 17	142.8	19.7	 16
525	 17	73.0	13.0	 16
526	 17	513.0	75.2	 16
527	 17	96.0	18.9	 16
528	 17	143.8	26.1	 16
529	 17	120.0	21.0	 16
530	 17	209.0	28.1	 16
531	 17	274.3	28.9	 16
532	 17	49.5	9.7	 16
533	 17	106.3	56.8	 16
534	 17	375.0	53.6	 16
535	 17	51.0	8.8	 16
536	 17	55.0	10.1	 16
537	 17	64.8	12.3	 16
538	 17	60.3	12.1	 16
539	 17	53.8	9.1	 16
540	 17	95.3	15.0	 16
541	 17	123.8	21.2	 16
542	 17	183.0	22.3	 16
543	 17	139.5	21.7	 16
544	 17	184.3	27.6	 16
545	 17	102.3	12.9	 16
546	 17	78.0	11.7	 16
547	 17	80.5	14.2	 16
548	 17	106.0	17.7	 16
549	 17	124.8	20.6	 16
550	 17	224.3	24.7	 16
551	 17	306.0	42.1	 16
552	 17	832.0	68.7	 16
553	 17	614.0	60.4	 16
554	 17	487.0	62.1	 16
555	 17	431.0	49.1	 16
556	 17	99.5	16.3	 16
557	 17	66.5	11.4	 16
558	 17	135.5	22.8	 16
559	 17	1073.3	106.6	 16
560	 17	84.3	9.2	 16
561	 17	53.5	6.2	 16
562	 17	79.5	12.7	 16
563	 17	143.0	23.5	 16
564	 17	3055.0	527.1	 16
565	 17	143.5	21.3	 16
566	 17	81.5	13.2	 16
567	 17	148.0	28.3	 16
568	 17	112.8	17.3	 16
569	 17	526.3	96.2	 16
570	 17	59.3	10.7	 16
571	 17	54.0	7.4	 16
572	 17	64.3	11.4	 16
573	 17	209.0	33.6	 16
574	 17	70.3	10.1	 16
575	 17	452.8	68.1	 16
576	 17	416.3	130.9	 16
577	 17	63.5	11.8	 16
578	 17	124.5	25.5	 16
579	 17	189.5	43.0	 16
580	 17	1176.5	246.8	 16
581	 17	227.3	35.6	 16
582	 17	234.8	47.0	 16
583	 17	139.5	19.4	 20
584	 17	2629.5	287.6	 16
585	 17	486.0	56.0	 16
586	 17	146.8	26.8	 16
587	 17	124.8	18.8	 16
588	 17	87.5	17.3	 16
589	 17	150.3	19.3	 16
590	 17	605.3	119.5	 16
591	 17	146.8	26.3	 16
592	 17	72.8	14.0	 16
593	 17	1175.8	124.7	 16
594	 17	165.3	29.9	 16
595	 17	98.3	17.7	 16
596	 17	427.3	50.5	 16
597	 17	458.8	38.5	 16
598	 17	87.3	16.0	 16
599	 17	92.3	16.3	 16
600	 17	135.0	16.6	 16
601	 17	477.3	47.6	 16
602	 17	1335.3	96.1	 16
603	 17	139.0	26.3	 16
604	 17	387.3	52.2	 16
605	 17	171.0	29.1	 16
606	 17	148.3	27.3	 16
607	 17	96.8	14.4	 16
608	 17	154.3	24.4	 16
609	 17	149.5	20.5	 16
610	 17	145.8	25.7	 16
611	 17	171.0	19.3	 16
612	 17	56.3	11.5	 16
613	 17	44.5	9.1	 16
614	 17	56.5	11.7	 16
615	 17	620.0	97.2	 16
616	 17	83.5	9.4	 16
617	 17	148.5	20.3	 16
618	 17	830.3	142.9	 16
619	 17	494.5	118.6	 16
620	 17	149.0	23.4	 16
621	 17	210.0	25.1	 16
622	 17	401.5	30.4	 16
623	 17	305.8	50.0	 16
624	 17	318.8	32.7	 16
625	 17	155.0	16.7	 16
626	 17	71.5	10.3	 16
627	 17	164.0	23.7	 16
628	 17	118.8	19.6	 16
629	 17	166.0	29.4	 16
630	 17	113.3	17.7	 16
631	 17	64.8	12.4	 16
632	 17	54.3	10.9	 16
633	 17	206.8	30.2	 16
634	 17	236.3	37.7	 16
635	 17	273.8	56.9	 16
636	 17	55.0	9.6	 16
637	 17	66.8	14.3	 16
638	 17	157.3	28.4	 16
639	 17	1016.8	203.0	 16
640	 17	285.8	61.6	 16
641	 17	242.0	60.5	 16
642	 17	745.3	122.5	 16
643	 17	367.8	69.3	 16
644	 17	63.3	15.2	 16
645	 17	1369.5	333.0	 16
646	 17	366.8	60.2	 16
647	 17	181.0	21.7	 16
648	 17	183.5	29.6	 16
649	 17	170.5	24.0	 16
650	 17	100.5	14.2	 16
651	 17	83.8	12.0	 16
652	 17	97.5	23.3	 16
653	 17	149.5	21.3	 16
654	 17	268.3	43.0	 16
655	 17	106.8	18.2	 16
656	 17	60.5	28.0	 16
657	 17	89.5	18.4	 16
658	 17	68.5	13.6	 16
659	 17	529.5	88.1	 16
660	 17	97.5	15.8	 16
661	 17	249.3	46.6	 16
662	 17	163.5	30.7	 16
663	 17	117.3	16.2	 16
664	 17	59.8	7.9	 16
665	 17	60.5	10.4	 16
666	 17	387.5	50.5	 16
667	 17	273.0	49.6	 16
668	 17	56.0	11.8	 16
669	 17	66.0	11.5	 16
670	 17	89.5	16.1	 16
671	 17	2109.3	478.1	 16
672	 17	2370.3	121.5	 16
673	 17	54.3	4.2	 16
674	 17	453.3	64.9	 16
675	 17	389.3	38.7	 16
676	 17	201.3	28.6	 16
677	 17	512.5	45.4	 16
678	 17	97.8	12.0	 16
679	 17	123.3	17.8	 16
680	 17	152.5	24.3	 16
681	 17	123.3	20.4	 16
682	 17	94.8	19.4	 16
683	 17	82.0	13.1	 16
684	 17	148.0	18.4	 16
685	 17	222.3	19.4	 16
686	 17	84.3	13.3	 16
687	 17	199.8	24.0	 16
688	 17	471.0	78.4	 16
689	 17	59.3	10.6	 16
690	 17	94.3	15.7	 16
691	 17	125.8	23.1	 16
692	 17	152.5	28.7	 16
693	 17	149.0	20.9	 16
694	 17	477.0	108.7	 16
695	 17	82.8	18.2	 16
696	 17	123.8	21.3	 16
697	 17	212.8	37.6	 16
698	 17	343.8	65.0	 16
699	 17	72.5	11.0	 16
700	 17	130.5	23.0	 16
701	 17	228.3	47.2	 16
702	 17	231.0	34.0	 20
703	 17	464.3	54.7	 16
704	 17	198.5	29.9	 16
705	 17	131.5	22.5	 16
706	 17	104.8	16.7	 16
707	 17	133.8	21.5	 16
708	 17	212.5	28.0	 16
709	 17	188.5	29.6	 16
710	 17	130.5	20.1	 16
711	 17	81.5	14.0	 16
  0	 18	7910.5	802.8	 16
  1	 18	92.0	15.9	 16
  2	 18	60.3	11.1	 16
  3	 18	314.8	47.8	 16
  4	 18	81.5	15.1	 16
  5	 18	145.0	25.2	 16
  6	 18	122.3	15.8	 16
  7	 18	79.5	13.0	 16
  8	 18	128.0	17.1	 16
  9	 18	84.5	18.2	 16
 10	 18	59.3	8.3	 16
 11	 18	62.0	13.9	 16
 12	 18	71.3	11.4	 16
 13	 18	69.5	13.2	 16
 14	 18	67.3	9.5	 16
 15	 18	60.0	8.9	 16
 16	 18	159.5	25.0	 16
 17	 18	68.0	15.6	 16
 18	 18	286.5	44.4	 16
 19	 18	132.5	22.0	 16
 20	 18	111.5	17.3	 16
 21	 18	84.5	14.1	 16
 22	 18	58.5	9.4	 16
 23	 18	76.8	16.2	 16
 24	 18	133.3	21.9	 16
 25	 18	49.3	6.5	 16
 26	 18	103.3	12.6	 16
 27	 18	57.0	14.0	 16
 28	 18	80.0	16.6	 16
 29	 18	59.5	8.7	 16
 30	 18	56.3	10.5	 16
 31	 18	56.8	9.7	 16
 32	 18	55.5	10.4	 16
 33	 18	50.0	7.5	 16
 34	 18	93.3	17.4	 16
 35	 18	194.0	28.0	 16
 36	 18	68.5	10.0	 16
 37	 18	85.5	10.9	 16
 38	 18	78.8	8.7	 16
 39	 18	103.8	18.5	 16
 40	 18	62.3	9.3	 16
 41	 18	65.8	12.3	 16
 42	 18	56.0	8.3	 16
 43	 18	63.8	8.7	 16
 44	 18	121.0	19.8	 16
 45	 18	215.8	30.0	 16
 46	 18	89.5	16.2	 16
 47	 18	108.8	16.6	 16
 48	 18	67.3	11.1	 16
 49	 18	72.3	16.6	 16
 50	 18	80.3	12.0	 16
 51	 18	117.3	23.6	 16
 52	 18	79.3	16.5	 16
 53	 18	65.5	12.0	 16
 54	 18	58.0	6.8	 16
 55	 18	57.0	9.0	 16
 56	 18	194.0	56.1	 16
 57	 18	63.0	9.9	 16
 58	 18	58.3	9.7	 16
 59	 18	65.0	14.0	 16
 60	 18	92.3	14.9	 16
 61	 18	97.0	21.0	 16
 62	 18	63.8	10.7	 16
 63	 18	322.5	72.1	 16
 64	 18	84.5	14.8	 16
 65	 18	64.0	11.6	 16
 66	 18	72.0	10.4	 16
 67	 18	82.3	13.3	 16
 68	 18	77.0	11.2	 16
 69	 18	350.8	33.9	 16
 70	 18	335.0	42.4	 16
 71	 18	171.3	24.4	 16
 72	 18	116.8	20.0	 16
 73	 18	82.0	13.2	 16
 74	 18	129.3	14.5	 16
 75	 18	69.0	11.0	 16
 76	 18	88.3	15.0	 16
 77	 18	84.0	11.2	 16
 78	 18	220.0	28.5	 16
 79	 18	113.3	23.7	 16
 80	 18	74.8	15.5	 16
 81	 18	63.0	13.3	 16
 82	 18	65.3	69.2	 16
 83	 18	70.3	12.6	 16
 84	 18	60.0	10.0	 16
 85	 18	64.5	13.4	 16
 86	 18	58.3	12.1	 16
 87	 18	83.3	13.4	 16
 88	 18	191.3	44.1	 16
 89	 18	359.3	64.3	 16
 90	 18	107.3	21.1	 16
 91	 18	207.8	28.4	 16
 92	 18	166.0	32.2	 16
 93	 18	157.5	26.0	 16
 94	 18	60.3	13.3	 16
 95	 18	118.0	19.1	 16
 96	 18	325.8	33.0	 16
 97	 18	326.0	41.0	 16
 98	 18	134.3	24.0	 16
 99	 18	168.5	33.4	 16
100	 18	183.8	23.1	 16
101	 18	127.0	15.5	 16
102	 18	106.8	14.3	 16
103	 18	72.3	11.3	 16
104	 18	54.5	10.1	 16
105	 18	132.5	25.8	 16
106	 18	63.0	11.5	 16
107	 18	60.0	7.8	 16
108	 18	75.0	9.6	 16
109	 18	102.8	18.4	 16
110	 18	103.0	18.9	 16
111	 18	200.0	27.6	 20
112	 18	244.0	40.8	 16
113	 18	89.0	18.5	 16
114	 18	63.3	13.3	 16
115	 18	226.5	42.2	 16
116	 18	115.0	16.7	 16
117	 18	132.8	26.7	 16
118	 18	97.3	15.9	 16
119	 18	133.3	25.7	 16
120	 18	71.0	12.3	 16
121	 18	54.5	11.6	 16
122	 18	60.3	10.0	 16
123	 18	75.3	17.2	 16
124	 18	149.5	28.3	 16
125	 18	97.3	21.0	 16
126	 18	177.5	19.0	 16
127	 18	96.3	20.9	 16
128	 18	57.5	11.2	 16
129	 18	60.3	10.7	 16
130	 18	63.8	9.8	 16
131	 18	145.3	27.3	 16
132	 18	67.8	10.3	 16
133	 18	63.3	13.2	 16
134	 18	70.0	10.6	 16
135	 18	60.0	10.5	 16
136	 18	60.5	11.5	 16
137	 18	80.3	16.0	 16
138	 18	68.3	11.4	 16
139	 18	54.3	12.4	 16
140	 18	71.3	11.9	 16
141	 18	67.8	14.7	 16
142	 18	98.3	23.7	 16
143	 18	70.8	19.7	 16
144	 18	71.3	9.1	 16
145	 18	60.8	12.0	 16
146	 18	75.5	15.0	 16
147	 18	56.0	5.3	 16
148	 18	80.3	15.3	 16
149	 18	54.3	11.8	 16
150	 18	51.8	12.4	 16
151	 18	64.3	9.0	 16
152	 18	82.0	9.2	 16
153	 18	89.5	16.8	 16
154	 18	82.8	12.5	 16
155	 18	58.0	11.7	 16
156	 18	58.5	10.4	 16
157	 18	221.5	29.1	 16
158	 18	75.0	12.4	 16
159	 18	116.3	23.4	 16
160	 18	214.3	19.3	 16
161	 18	104.5	18.6	 16
162	 18	92.8	14.7	 16
163	 18	68.0	9.9	 16
164	 18	85.8	16.3	 16
165	 18	61.0	13.0	 16
166	 18	56.3	10.9	 16
167	 18	70.8	10.9	 16
168	 18	85.0	17.1	 16
169	 18	94.8	16.4	 16
170	 18	204.5	24.0	 16
171	 18	66.3	12.1	 16
172	 18	394.5	44.9	 16
173	 18	151.5	29.7	 16
174	 18	103.3	11.9	 16
175	 18	210.0	22.4	 16
176	 18	519.8	50.2	 16
177	 18	343.5	29.4	 16
178	 18	906.0	48.9	 16
179	 18	352.5	28.9	 16
180	 18	101.8	17.9	 16
181	 18	82.0	12.9	 16
182	 18	111.3	18.4	 16
183	 18	115.5	13.3	 16
184	 18	72.3	9.2	 16
185	 18	53.3	9.3	 16
186	 18	83.3	11.0	 16
187	 18	77.0	18.3	 16
188	 18	62.0	12.3	 16
189	 18	95.8	13.5	 16
190	 18	58.3	13.6	 16
191	 18	82.3	9.4	 16
192	 18	83.0	14.0	 16
193	 18	175.3	37.3	 16
194	 18	1769.5	196.2	 16
195	 18	221.8	28.1	 16
196	 18	67.0	10.1	 16
197	 18	57.0	8.4	 16
198	 18	114.3	21.3	 16
199	 18	166.5	22.2	 16
200	 18	309.3	58.3	 16
201	 18	83.8	17.4	 16
202	 18	150.0	18.6	 16
203	 18	119.5	17.7	 16
204	 18	85.8	16.5	 16
205	 18	83.3	14.7	 16
206	 18	160.3	21.4	 16
207	 18	54.0	7.9	 16
208	 18	56.0	8.5	 16
209	 18	61.3	11.3	 16
210	 18	160.0	14.5	 16
211	 18	58.8	11.1	 16
212	 18	169.3	32.6	 16
213	 18	79.0	14.5	 16
214	 18	70.8	14.1	 16
215	 18	56.3	9.8	 16
216	 18	74.0	12.9	 16
217	 18	75.0	13.0	 16
218	 18	66.3	11.4	 16
219	 18	55.8	9.7	 16
220	 18	73.3	16.6	 16
221	 18	46.5	10.0	 16
222	 18	55.0	9.6	 16
223	 18	54.5	8.5	 16
224	 18	77.0	12.7	 16
225	 18	54.5	11.2	 16
226	 18	58.3	7.6	 16
227	 18	53.3	9.6	 16
228	 18	94.0	19.2	 16
229	 18	94.3	17.5	 16
230	 18	69.8	20.0	 20
231	 18	535.0	63.9	 16
232	 18	113.5	13.0	 16
233	 18	389.5	36.5	 16
234	 18	307.8	35.5	 16
235	 18	90.8	16.3	 16
236	 18	61.3	9.5	 16
237	 18	202.0	36.9	 16
238	 18	49.3	10.2	 16
239	 18	124.5	19.6	 16
240	 18	78.5	17.8	 16
241	 18	70.3	18.6	 16
242	 18	189.8	41.5	 16
243	 18	517.5	53.4	 16
244	 18	88.3	10.7	 16
245	 18	174.5	28.3	 16
246	 18	97.5	18.4	 16
247	 18	54.0	7.4	 16
248	 18	85.0	11.8	 16
249	 18	73.3	15.0	 16
250	 18	65.5	11.2	 16
251	 18	78.3	11.3	 16
252	 18	74.3	14.7	 16
253	 18	83.8	19.3	 16
254	 18	70.0	13.8	 16
255	 18	58.3	10.3	 16
256	 18	113.3	16.1	 16
257	 18	65.8	11.1	 16
258	 18	259.0	36.4	 16
259	 18	68.0	8.9	 16
260	 18	85.0	13.0	 16
261	 18	853.8	84.9	 16
262	 18	145.0	21.2	 16
263	 18	67.3	10.1	 16
264	 18	56.3	7.1	 16
265	 18	90.3	16.6	 16
266	 18	72.0	11.8	 16
267	 18	76.8	17.9	 16
268	 18	98.0	17.0	 16
269	 18	285.5	32.3	 16
270	 18	134.3	18.9	 16
271	 18	106.3	24.0	 16
272	 18	114.3	12.8	 16
273	 18	71.0	14.8	 16
274	 18	63.8	10.7	 16
275	 18	182.5	28.8	 16
276	 18	106.3	14.3	 16
277	 18	114.3	20.4	 16
278	 18	91.0	13.7	 16
279	 18	88.0	16.6	 16
280	 18	59.3	10.2	 16
281	 18	61.3	13.7	 16
282	 18	88.3	13.9	 16
283	 18	62.0	8.5	 16
284	 18	67.3	10.6	 16
285	 18	63.0	12.2	 16
286	 18	54.3	9.2	 16
287	 18	75.8	9.6	 16
288	 18	95.0	13.6	 16
289	 18	64.3	11.4	 16
290	 18	116.0	14.8	 16
291	 18	102.3	16.2	 16
292	 18	82.0	29.3	 16
293	 18	64.0	10.0	 16
294	 18	60.3	9.6	 16
295	 18	67.0	11.2	 16
296	 18	49.8	8.5	 16
297	 18	54.0	10.1	 16
298	 18	48.8	8.5	 16
299	 18	67.5	14.4	 16
300	 18	127.8	21.7	 16
301	 18	94.5	19.5	 16
302	 18	89.3	16.9	 16
303	 18	114.8	12.8	 16
304	 18	124.0	16.8	 16
305	 18	58.3	8.3	 16
306	 18	74.3	11.5	 16
307	 18	1160.3	207.6	 16
308	 18	1307.5	118.2	 16
309	 18	1415.5	152.8	 16
310	 18	90.3	17.7	 16
311	 18	73.5	16.9	 16
312	 18	100.3	16.1	 16
313	 18	193.0	30.0	 16
314	 18	102.3	16.3	 16
315	 18	151.8	17.0	 16
316	 18	537.5	63.5	 16
317	 18	67.5	9.2	 16
318	 18	74.3	13.4	 16
319	 18	52.0	9.6	 16
320	 18	67.0	11.5	 16
321	 18	71.8	14.2	 16
322	 18	83.0	13.5	 16
323	 18	66.0	9.6	 16
324	 18	55.3	9.3	 16
325	 18	61.0	9.9	 16
326	 18	55.0	9.1	 16
327	 18	79.5	26.9	 16
328	 18	67.0	12.6	 16
329	 18	64.3	8.5	 16
330	 18	158.5	31.0	 16
331	 18	118.0	20.7	 16
332	 18	105.5	21.2	 16
333	 18	147.5	26.5	 16
334	 18	66.5	11.3	 16
335	 18	172.0	28.6	 16
336	 18	102.3	16.3	 16
337	 18	59.5	14.7	 16
338	 18	95.3	11.4	 16
339	 18	1145.5	184.7	 16
340	 18	82.5	19.6	 16
341	 18	54.5	7.2	 16
342	 18	190.3	34.3	 16
343	 18	74.5	15.5	 16
344	 18	88.0	13.6	 16
345	 18	94.5	14.4	 16
346	 18	89.5	14.5	 16
347	 18	222.3	24.9	 16
348	 18	157.3	22.3	 16
349	 18	197.5	29.1	 20
350	 18	55.3	11.9	 16
351	 18	66.3	12.3	 16
352	 18	940.3	149.5	 16
353	 18	49.3	9.8	 16
354	 18	147.8	18.4	 16
355	 18	70.8	12.9	 16
356	 18	78.8	15.1	 16
357	 18	74.5	10.4	 16
358	 18	80.8	15.5	 16
359	 18	71.3	13.2	 16
360	 18	59.5	10.8	 16
361	 18	93.0	13.0	 16
362	 18	80.3	17.0	 16
363	 18	137.5	24.8	 16
364	 18	130.3	25.8	 16
365	 18	92.0	11.8	 16
366	 18	103.0	17.5	 16
367	 18	59.0	10.5	 16
368	 18	57.3	10.4	 16
369	 18	157.0	24.3	 16
370	 18	58.0	11.3	 16
371	 18	58.5	7.7	 16
372	 18	73.3	14.3	 16
373	 18	61.3	15.7	 16
374	 18	49.8	8.9	 16
375	 18	62.5	14.6	 16
376	 18	57.8	7.8	 16
377	 18	90.3	9.9	 16
378	 18	54.3	9.9	 16
379	 18	55.3	14.2	 16
380	 18	71.3	11.0	 16
381	 18	206.0	36.4	 16
382	 18	54.3	12.1	 16
383	 18	115.8	21.3	 16
384	 18	94.0	16.2	 16
385	 18	689.0	88.2	 16
386	 18	155.8	29.6	 16
387	 18	138.3	22.0	 16
388	 18	64.5	15.6	 16
389	 18	102.3	14.6	 16
390	 18	62.3	11.6	 16
391	 18	97.5	16.4	 16
392	 18	55.0	10.4	 16
393	 18	63.0	13.7	 16
394	 18	86.0	15.0	 16
395	 18	157.0	22.0	 16
396	 18	112.3	16.8	 16
397	 18	62.0	9.4	 16
398	 18	64.3	9.8	 16
399	 18	55.0	9.1	 16
400	 18	76.3	17.5	 16
401	 18	58.0	10.2	 16
402	 18	138.0	21.6	 16
403	 18	95.5	10.3	 16
404	 18	296.8	29.4	 16
405	 18	57.3	11.8	 16
406	 18	58.3	9.1	 16
407	 18	109.3	20.8	 16
408	 18	54.3	10.3	 16
409	 18	64.8	7.4	 16
410	 18	58.5	10.5	 16
411	 18	69.0	10.4	 16
412	 18	98.5	16.5	 16
413	 18	78.8	15.2	 16
414	 18	116.0	17.9	 16
415	 18	59.3	12.3	 16
416	 18	57.3	10.6	 16
417	 18	69.5	30.9	 16
418	 18	84.0	12.6	 16
419	 18	51.3	10.9	 16
420	 18	77.3	12.4	 16
421	 18	72.5	10.7	 16
422	 18	181.0	22.3	 16
423	 18	133.0	30.2	 16
424	 18	112.5	17.9	 16
425	 18	83.5	13.1	 16
426	 18	183.3	22.7	 16
427	 18	97.3	12.0	 16
428	 18	58.3	9.3	 16
429	 18	61.3	10.3	 16
430	 18	184.0	29.5	 16
431	 18	171.5	27.2	 16
432	 18	171.3	20.5	 16
433	 18	56.8	15.5	 16
434	 18	105.3	18.9	 16
435	 18	66.3	11.1	 16
436	 18	88.5	15.4	 16
437	 18	85.8	15.4	 16
438	 18	78.3	11.1	 16
439	 18	52.5	8.5	 16
440	 18	80.8	12.2	 16
441	 18	96.8	15.9	 16
442	 18	148.8	21.1	 16
443	 18	225.0	29.7	 16
444	 18	127.5	18.4	 16
445	 18	83.0	8.5	 16
446	 18	87.5	12.6	 16
447	 18	63.8	11.1	 16
448	 18	86.0	12.9	 16
449	 18	56.5	11.4	 16
450	 18	58.3	7.2	 16
451	 18	65.3	12.5	 16
452	 18	202.8	30.8	 16
453	 18	90.8	14.0	 16
454	 18	68.3	12.2	 16
455	 18	78.0	13.7	 16
456	 18	74.3	13.9	 16
457	 18	56.3	9.3	 16
458	 18	64.5	13.3	 16
459	 18	77.0	12.5	 16
460	 18	128.5	26.4	 16
461	 18	115.3	17.2	 16
462	 18	185.8	24.0	 16
463	 18	154.3	22.8	 16
464	 18	327.8	48.3	 16
465	 18	203.5	38.1	 16
466	 18	66.5	13.3	 16
467	 18	200.5	30.9	 20
468	 18	95.3	12.4	 16
469	 18	59.3	12.1	 16
470	 18	126.3	26.2	 16
471	 18	68.3	13.4	 16
472	 18	74.3	12.6	 16
473	 18	57.0	10.5	 16
474	 18	82.5	14.7	 16
475	 18	286.3	38.1	 16
476	 18	60.3	9.1	 16
477	 18	50.5	9.2	 16
478	 18	195.3	28.8	 16
479	 18	195.3	23.2	 16
480	 18	117.0	20.8	 16
481	 18	89.5	19.3	 16
482	 18	298.8	44.1	 16
483	 18	142.0	24.5	 16
484	 18	63.0	11.8	 16
485	 18	140.3	23.2	 16
486	 18	60.3	8.7	 16
487	 18	210.3	34.0	 16
488	 18	56.3	9.6	 16
489	 18	65.5	14.5	 16
490	 18	86.0	12.1	 16
491	 18	58.0	9.6	 16
492	 18	53.0	8.3	 16
493	 18	76.8	15.3	 16
494	 18	746.5	96.3	 16
495	 18	186.5	31.7	 16
496	 18	110.3	16.1	 16
497	 18	70.0	10.5	 16
498	 18	116.8	20.5	 16
499	 18	68.3	13.5	 16
500	 18	62.8	11.0	 16
501	 18	59.3	10.2	 16
502	 18	69.0	8.6	 16
503	 18	69.3	12.0	 16
504	 18	74.0	10.1	 16
505	 18	46.5	7.8	 16
506	 18	49.3	7.0	 16
507	 18	57.3	11.1	 16
508	 18	57.0	10.8	 16
509	 18	69.8	13.9	 16
510	 18	82.3	13.4	 16
511	 18	132.8	27.2	 16
512	 18	53.0	12.0	 16
513	 18	60.0	13.4	 16
514	 18	57.3	10.7	 16
515	 18	232.3	48.0	 16
516	 18	98.5	14.9	 16
517	 18	76.5	21.9	 16
518	 18	101.3	12.3	 16
519	 18	57.5	8.5	 16
520	 18	63.8	10.3	 16
521	 18	53.0	9.6	 16
522	 18	72.3	9.8	 16
523	 18	131.3	11.5	 16
524	 18	58.5	10.5	 16
525	 18	77.5	14.7	 16
526	 18	62.3	17.8	 16
527	 18	59.8	9.3	 16
528	 18	114.8	23.3	 16
529	 18	56.3	10.5	 16
530	 18	68.5	20.4	 16
531	 18	70.8	14.3	 16
532	 18	56.8	14.8	 16
533	 18	80.0	11.3	 16
534	 18	89.8	12.6	 16
535	 18	54.3	9.3	 16
536	 18	62.3	10.6	 16
537	 18	56.0	15.2	 16
538	 18	52.0	6.1	 16
539	 18	60.5	16.7	 16
540	 18	106.5	14.5	 16
541	 18	302.3	44.3	 16
542	 18	177.5	21.8	 16
543	 18	94.5	13.5	 16
544	 18	57.8	10.4	 16
545	 18	110.8	18.2	 16
546	 18	138.0	17.7	 16
547	 18	159.3	24.9	 16
548	 18	100.3	14.7	 16
549	 18	93.5	15.5	 16
550	 18	266.3	27.0	 16
551	 18	113.8	21.1	 16
552	 18	109.0	20.1	 16
553	 18	70.0	12.7	 16
554	 18	89.8	11.9	 16
555	 18	95.3	9.4	 16
556	 18	112.8	28.6	 16
557	 18	55.3	10.6	 16
558	 18	80.5	10.3	 16
559	 18	924.8	65.6	 16
560	 18	72.3	11.4	 16
561	 18	59.5	11.1	 16
562	 18	61.0	13.7	 16
563	 18	156.3	20.9	 16
564	 18	373.3	72.6	 16
565	 18	62.3	10.7	 16
566	 18	69.0	14.8	 16
567	 18	82.0	10.3	 16
568	 18	69.0	12.1	 16
569	 18	88.3	15.0	 16
570	 18	53.8	7.4	 16
571	 18	54.3	8.6	 16
572	 18	70.0	12.2	 16
573	 18	162.0	27.5	 16
574	 18	110.8	19.9	 16
575	 18	486.5	80.6	 16
576	 18	336.3	114.4	 16
577	 18	121.0	23.6	 16
578	 18	82.0	13.7	 16
579	 18	63.0	9.2	 16
580	 18	558.8	103.1	 16
581	 18	159.3	35.1	 16
582	 18	174.5	21.8	 16
583	 18	79.0	15.8	 16
584	 18	504.8	130.3	 16
585	 18	256.3	34.2	 16
586	 18	144.8	20.1	 20
587	 18	57.0	7.6	 16
588	 18	53.5	12.4	 16
589	 18	93.3	14.3	 16
590	 18	139.0	20.8	 16
591	 18	66.3	11.5	 16
592	 18	78.3	11.8	 16
593	 18	59.0	8.3	 16
594	 18	71.0	11.3	 16
595	 18	90.3	18.3	 16
596	 18	457.8	35.7	 16
597	 18	175.8	27.7	 16
598	 18	83.0	18.8	 16
599	 18	83.8	12.5	 16
600	 18	88.3	30.5	 16
601	 18	530.3	56.3	 16
602	 18	1065.8	69.5	 16
603	 18	139.0	12.9	 16
604	 18	191.0	22.1	 16
605	 18	94.5	20.2	 16
606	 18	105.0	12.1	 16
607	 18	69.3	10.3	 16
608	 18	94.5	14.1	 16
609	 18	77.3	14.2	 16
610	 18	55.5	8.2	 16
611	 18	118.0	15.5	 16
612	 18	61.5	14.4	 16
613	 18	55.0	14.2	 16
614	 18	49.3	8.1	 16
615	 18	211.5	28.2	 16
616	 18	176.0	19.9	 16
617	 18	125.8	19.3	 16
618	 18	207.0	36.8	 16
619	 18	83.3	15.5	 16
620	 18	388.3	31.8	 16
621	 18	95.3	14.6	 16
622	 18	409.3	29.9	 16
623	 18	98.3	16.9	 16
624	 18	175.0	28.1	 16
625	 18	375.3	29.4	 16
626	 18	80.0	11.0	 16
627	 18	54.3	8.2	 16
628	 18	265.8	34.8	 16
629	 18	150.0	17.6	 16
630	 18	102.0	16.6	 16
631	 18	78.0	20.2	 16
632	 18	56.5	11.7	 16
633	 18	68.3	10.2	 16
634	 18	70.5	14.5	 16
635	 18	135.5	24.9	 16
636	 18	53.8	9.1	 16
637	 18	50.8	14.5	 16
638	 18	74.5	8.4	 16
639	 18	329.0	34.0	 16
640	 18	91.0	16.0	 16
641	 18	88.8	16.0	 16
642	 18	291.3	36.5	 16
643	 18	182.0	15.8	 16
644	 18	73.0	18.4	 16
645	 18	149.5	45.2	 16
646	 18	100.3	19.5	 16
647	 18	125.3	18.4	 16
648	 18	143.5	24.8	 16
649	 18	130.3	24.4	 16
650	 18	107.5	23.2	 16
651	 18	52.3	9.2	 16
652	 18	85.8	15.4	 16
653	 18	101.8	13.9	 16
654	 18	103.0	14.8	 16
655	 18	62.5	12.5	 16
656	 18	55.0	10.3	 16
657	 18	156.3	27.0	 16
658	 18	60.3	16.0	 16
659	 18	134.3	29.3	 16
660	 18	65.3	15.6	 16
661	 18	54.5	8.6	 16
662	 18	65.3	10.1	 16
663	 18	81.8	11.7	 16
664	 18	55.3	13.7	 16
665	 18	78.3	15.3	 16
666	 18	104.3	13.8	 16
667	 18	60.5	14.8	 16
668	 18	54.0	10.6	 16
669	 18	59.0	9.8	 16
670	 18	60.3	9.4	 16
671	 18	601.8	111.0	 16
672	 18	619.3	94.6	 16
673	 18	56.8	8.9	 16
674	 18	124.5	20.2	 16
675	 18	344.3	38.8	 16
676	 18	108.5	17.3	 16
677	 18	921.3	82.5	 16
678	 18	82.5	14.1	 16
679	 18	92.3	16.2	 16
680	 18	78.5	11.4	 16
681	 18	117.0	27.9	 16
682	 18	84.5	14.9	 16
683	 18	68.5	14.6	 16
684	 18	128.5	22.4	 16
685	 18	129.0	27.3	 16
686	 18	106.3	17.8	 16
687	 18	138.3	21.2	 16
688	 18	226.3	23.1	 16
689	 18	64.5	9.1	 16
690	 18	95.5	13.8	 16
691	 18	68.5	9.4	 16
692	 18	105.3	15.7	 16
693	 18	123.3	21.2	 16
694	 18	76.8	11.7	 16
695	 18	67.3	11.3	 16
696	 18	979.3	170.8	 16
697	 18	117.8	16.6	 16
698	 18	124.5	20.4	 16
699	 18	53.5	11.0	 16
700	 18	60.8	10.4	 16
701	 18	92.8	15.6	 16
702	 18	210.8	40.3	 16
703	 18	88.3	14.9	 16
704	 18	273.8	46.2	 16
705	 18	186.3	25.0	 20
706	 18	104.5	13.8	 16
707	 18	156.3	22.3	 16
708	 18	80.3	13.4	 16
709	 18	126.0	19.8	 16
710	 18	758.0	67.1	 16
711	 18	5485.3	529.5	 16
  0	 19	91.3	12.9	 16
  1	 19	161.8	22.5	 16
  2	 19	73.0	12.4	 16
  3	 19	367.5	44.0	 16
  4	 19	210.0	33.4	 16
  5	 19	314.0	44.4	 16
  6	 19	76.5	12.0	 16
  7	 19	75.5	13.5	 16
  8	 19	298.3	47.8	 16
  9	 19	51.5	9.0	 16
 10	 19	73.3	15.4	 16
 11	 19	355.3	59.5	 16
 12	 19	156.8	17.2	 16
 13	 19	174.3	28.1	 16
 14	 19	509.8	27.1	 16
 15	 19	251.5	24.2	 16
 16	 19	318.0	32.6	 16
 17	 19	336.5	38.1	 16
 18	 19	203.8	29.4	 16
 19	 19	156.3	19.4	 16
 20	 19	69.8	12.3	 16
 21	 19	105.5	14.5	 16
 22	 19	309.5	35.0	 16
 23	 19	611.0	76.3	 16
 24	 19	996.5	89.7	 16
 25	 19	196.3	23.0	 16
 26	 19	241.3	38.3	 16
 27	 19	860.5	112.0	 16
 28	 19	59.5	12.3	 16
 29	 19	54.5	9.7	 16
 30	 19	63.0	8.1	 16
 31	 19	362.8	43.8	 16
 32	 19	93.5	14.6	 16
 33	 19	77.3	12.2	 16
 34	 19	391.0	58.9	 16
 35	 19	193.3	29.7	 16
 36	 19	647.3	143.9	 16
 37	 19	190.0	33.6	 16
 38	 19	4817.0	942.1	 16
 39	 19	580.0	78.9	 16
 40	 19	134.3	22.1	 16
 41	 19	72.5	11.8	 16
 42	 19	68.3	16.0	 16
 43	 19	446.3	75.8	 16
 44	 19	784.3	101.3	 16
 45	 19	109.3	20.5	 16
 46	 19	361.8	59.8	 16
 47	 19	652.0	47.5	 16
 48	 19	143.0	22.6	 16
 49	 19	1968.8	236.0	 16
 50	 19	68.3	11.6	 16
 51	 19	180.8	21.0	 16
 52	 19	171.8	17.7	 16
 53	 19	312.5	28.5	 16
 54	 19	72.3	14.5	 16
 55	 19	686.8	96.5	 16
 56	 19	1097.8	130.6	 16
 57	 19	86.3	10.5	 16
 58	 19	363.0	64.8	 16
 59	 19	586.3	86.2	 16
 60	 19	199.3	20.3	 16
 61	 19	715.5	105.0	 16
 62	 19	149.8	17.1	 16
 63	 19	725.5	106.5	 16
 64	 19	266.8	43.0	 16
 65	 19	124.5	26.8	 16
 66	 19	118.0	18.4	 16
 67	 19	114.3	17.7	 16
 68	 19	108.0	10.9	 16
 69	 19	267.5	37.0	 16
 70	 19	1252.0	75.7	 16
 71	 19	879.3	59.5	 16
 72	 19	247.5	27.2	 16
 73	 19	315.8	44.3	 16
 74	 19	634.5	60.8	 16
 75	 19	74.5	9.5	 16
 76	 19	98.0	16.5	 16
 77	 19	762.3	58.7	 16
 78	 19	123.0	23.3	 16
 79	 19	72.3	11.2	 16
 80	 19	76.8	17.1	 16
 81	 19	71.5	9.3	 16
 82	 19	103.8	16.7	 16
 83	 19	492.0	66.9	 16
 84	 19	110.3	19.2	 16
 85	 19	214.0	25.6	 16
 86	 19	319.0	56.9	 16
 87	 19	3943.0	506.2	 16
 88	 19	187.5	31.6	 16
 89	 19	93.8	19.7	 16
 90	 19	1656.5	263.8	 16
 91	 19	224.5	42.0	 16
 92	 19	64.0	14.0	 16
 93	 19	74.0	9.3	 16
 94	 19	211.3	42.5	 16
 95	 19	539.5	58.3	 16
 96	 19	1261.3	144.4	 16
 97	 19	83.5	10.3	 16
 98	 19	115.8	17.0	 16
 99	 19	79.0	13.0	 16
100	 19	174.3	33.2	 16
101	 19	114.0	19.1	 16
102	 19	616.5	68.6	 16
103	 19	289.5	48.1	 16
104	 19	323.0	36.6	 16
105	 19	373.3	48.3	 16
106	 19	355.8	56.0	 16
107	 19	421.0	38.8	 16
108	 19	86.3	15.4	 16
109	 19	88.0	11.5	 16
110	 19	93.3	25.0	 16
111	 19	260.0	39.1	 16
112	 19	250.5	46.2	 16
113	 19	1488.0	326.6	 16
114	 19	92.3	18.5	 20
115	 19	99.8	14.7	 16
116	 19	90.5	14.3	 16
117	 19	67.3	10.8	 16
118	 19	63.5	12.3	 16
119	 19	2267.3	305.5	 16
120	 19	63.0	11.7	 16
121	 19	58.3	12.3	 16
122	 19	92.3	17.2	 16
123	 19	93.0	18.6	 16
124	 19	81.5	16.1	 16
125	 19	100.3	17.1	 16
126	 19	238.5	30.1	 16
127	 19	628.8	62.2	 16
128	 19	136.8	15.1	 16
129	 19	101.8	16.5	 16
130	 19	146.8	27.3	 16
131	 19	475.5	66.3	 16
132	 19	147.3	18.5	 16
133	 19	75.5	15.0	 16
134	 19	133.8	18.4	 16
135	 19	65.3	12.7	 16
136	 19	65.0	12.4	 16
137	 19	590.3	92.2	 16
138	 19	103.0	21.0	 16
139	 19	239.0	44.0	 16
140	 19	99.8	18.5	 16
141	 19	1860.8	370.9	 16
142	 19	91.0	19.7	 16
143	 19	262.0	50.3	 16
144	 19	58.8	10.7	 16
145	 19	600.3	57.7	 16
146	 19	216.3	38.6	 16
147	 19	76.3	14.6	 16
148	 19	65.5	11.1	 16
149	 19	69.3	13.7	 16
150	 19	141.0	16.8	 16
151	 19	171.0	24.1	 16
152	 19	106.3	20.5	 16
153	 19	395.0	38.9	 16
154	 19	1368.5	152.0	 16
155	 19	311.3	37.7	 16
156	 19	66.8	12.8	 16
157	 19	333.8	35.8	 16
158	 19	702.3	96.8	 16
159	 19	138.3	18.2	 16
160	 19	640.8	81.0	 16
161	 19	83.5	12.1	 16
162	 19	151.5	24.1	 16
163	 19	284.8	23.5	 16
164	 19	133.3	17.0	 16
165	 19	73.5	21.2	 16
166	 19	125.3	19.6	 16
167	 19	62.3	12.3	 16
168	 19	626.3	128.3	 16
169	 19	63.5	10.2	 16
170	 19	583.3	117.9	 16
171	 19	117.5	17.3	 16
172	 19	121.3	20.6	 16
173	 19	517.3	54.0	 16
174	 19	178.0	18.6	 16
175	 19	61.0	14.0	 16
176	 19	113.0	13.4	 16
177	 19	59.5	10.2	 16
178	 19	199.5	29.2	 16
179	 19	153.5	28.7	 16
180	 19	285.5	29.6	 16
181	 19	396.0	47.5	 16
182	 19	67.0	13.7	 16
183	 19	591.0	66.4	 16
184	 19	100.8	16.1	 16
185	 19	206.0	31.6	 16
186	 19	220.5	25.2	 16
187	 19	435.5	52.9	 16
188	 19	92.3	18.9	 16
189	 19	55.0	10.4	 16
190	 19	118.0	25.2	 16
191	 19	623.8	108.8	 16
192	 19	186.8	20.2	 16
193	 19	353.8	74.2	 16
194	 19	105.0	17.2	 16
195	 19	869.3	157.6	 16
196	 19	76.8	16.0	 16
197	 19	82.0	15.1	 16
198	 19	93.3	20.5	 16
199	 19	427.5	73.0	 16
200	 19	597.0	91.3	 16
201	 19	929.8	98.9	 16
202	 19	177.3	18.5	 16
203	 19	144.0	24.5	 16
204	 19	183.0	32.5	 16
205	 19	171.5	25.9	 16
206	 19	68.5	12.9	 16
207	 19	67.0	11.2	 16
208	 19	1080.8	156.8	 16
209	 19	66.5	5.8	 16
210	 19	73.0	11.0	 16
211	 19	84.3	16.0	 16
212	 19	61.0	12.6	 16
213	 19	74.0	11.5	 16
214	 19	83.5	17.7	 16
215	 19	2048.0	329.9	 16
216	 19	92.0	21.2	 16
217	 19	1152.3	191.7	 16
218	 19	121.0	18.8	 16
219	 19	71.8	12.9	 16
220	 19	77.5	14.7	 16
221	 19	82.5	12.2	 16
222	 19	695.0	136.3	 16
223	 19	63.3	9.3	 16
224	 19	646.0	81.2	 16
225	 19	56.3	7.7	 16
226	 19	83.0	16.1	 16
227	 19	195.3	25.1	 16
228	 19	124.8	22.6	 16
229	 19	3233.5	439.9	 16
230	 19	423.5	60.8	 16
231	 19	639.8	88.2	 16
232	 19	87.3	25.3	 16
233	 19	73.3	13.2	 20
234	 19	61.3	9.4	 16
235	 19	181.3	17.6	 16
236	 19	351.8	72.9	 16
237	 19	64.0	8.6	 16
238	 19	277.0	38.2	 16
239	 19	71.3	13.4	 16
240	 19	153.0	26.7	 16
241	 19	158.5	25.4	 16
242	 19	72.5	12.8	 16
243	 19	93.5	16.7	 16
244	 19	93.3	13.9	 16
245	 19	95.3	21.7	 16
246	 19	114.5	20.5	 16
247	 19	66.3	10.7	 16
248	 19	2781.8	496.2	 16
249	 19	85.8	24.6	 16
250	 19	54.0	9.2	 16
251	 19	62.5	11.6	 16
252	 19	56.3	7.9	 16
253	 19	49.5	12.9	 16
254	 19	67.0	10.3	 16
255	 19	63.3	9.9	 16
256	 19	71.3	10.0	 16
257	 19	124.8	26.6	 16
258	 19	62.8	11.1	 16
259	 19	301.5	36.7	 16
260	 19	155.5	29.4	 16
261	 19	290.5	29.4	 16
262	 19	651.8	75.7	 16
263	 19	65.3	11.8	 16
264	 19	205.0	29.4	 16
265	 19	79.8	12.0	 16
266	 19	211.0	30.5	 16
267	 19	148.3	26.4	 16
268	 19	87.8	13.7	 16
269	 19	205.3	30.3	 16
270	 19	174.5	23.5	 16
271	 19	1751.5	232.8	 16
272	 19	1042.3	136.3	 16
273	 19	67.3	9.3	 16
274	 19	132.5	16.2	 16
275	 19	119.0	20.0	 16
276	 19	154.8	38.5	 16
277	 19	56.3	8.1	 16
278	 19	300.5	37.6	 16
279	 19	82.5	15.0	 16
280	 19	311.8	30.4	 16
281	 19	52.3	7.7	 16
282	 19	60.3	12.0	 16
283	 19	57.0	8.7	 16
284	 19	70.3	13.8	 16
285	 19	67.3	9.0	 16
286	 19	81.5	14.8	 16
287	 19	219.3	28.5	 16
288	 19	68.0	11.1	 16
289	 19	323.0	40.6	 16
290	 19	700.5	83.2	 16
291	 19	342.8	41.6	 16
292	 19	62.5	10.3	 16
293	 19	284.5	41.0	 16
294	 19	298.8	40.9	 16
295	 19	97.0	18.0	 16
296	 19	86.5	13.0	 16
297	 19	67.0	13.6	 16
298	 19	65.3	12.5	 16
299	 19	166.3	27.0	 16
300	 19	56.8	11.3	 16
301	 19	68.3	10.9	 16
302	 19	215.5	40.0	 16
303	 19	259.5	32.0	 16
304	 19	624.8	74.1	 16
305	 19	87.3	18.0	 16
306	 19	196.8	27.1	 16
307	 19	306.8	52.4	 16
308	 19	126.8	18.1	 16
309	 19	71.3	12.0	 16
310	 19	416.3	55.6	 16
311	 19	77.5	14.9	 16
312	 19	1074.8	121.5	 16
313	 19	50.3	7.8	 16
314	 19	147.0	19.7	 16
315	 19	250.5	39.1	 16
316	 19	60.3	11.2	 16
317	 19	417.0	41.1	 16
318	 19	163.8	23.1	 16
319	 19	115.8	17.9	 16
320	 19	624.0	86.8	 16
321	 19	417.0	45.9	 16
322	 19	70.0	11.8	 16
323	 19	83.0	11.2	 16
324	 19	113.3	16.3	 16
325	 19	54.3	9.9	 16
326	 19	893.3	192.8	 16
327	 19	86.8	16.2	 16
328	 19	57.0	11.2	 16
329	 19	55.0	13.1	 16
330	 19	58.8	9.7	 16
331	 19	76.8	10.1	 16
332	 19	66.5	16.7	 16
333	 19	707.0	72.9	 16
334	 19	101.3	13.9	 16
335	 19	500.8	43.4	 16
336	 19	50.5	7.9	 16
337	 19	53.3	6.4	 16
338	 19	165.8	28.0	 16
339	 19	75.5	16.7	 16
340	 19	74.0	10.0	 16
341	 19	57.3	10.1	 16
342	 19	53.5	8.4	 16
343	 19	70.0	11.0	 16
344	 19	57.0	11.1	 16
345	 19	55.8	9.6	 16
346	 19	61.5	8.6	 16
347	 19	56.3	8.9	 16
348	 19	136.8	15.1	 16
349	 19	271.0	50.0	 16
350	 19	64.3	14.0	 16
351	 19	258.3	38.7	 20
352	 19	73.3	9.6	 16
353	 19	196.0	36.9	 16
354	 19	91.5	14.5	 16
355	 19	119.0	17.6	 16
356	 19	139.8	25.2	 16
357	 19	572.3	58.7	 16
358	 19	6992.0	581.8	 16
359	 19	234.8	26.5	 16
360	 19	185.8	26.7	 16
361	 19	859.0	86.7	 16
362	 19	117.0	19.7	 16
363	 19	157.5	17.3	 16
364	 19	360.5	50.3	 16
365	 19	99.3	13.2	 16
366	 19	133.5	16.4	 16
367	 19	60.3	9.0	 16
368	 19	82.5	14.0	 16
369	 19	141.5	23.5	 16
370	 19	53.3	7.2	 16
371	 19	77.3	11.5	 16
372	 19	150.0	24.0	 16
373	 19	318.8	45.5	 16
374	 19	242.8	39.4	 16
375	 19	70.0	11.4	 16
376	 19	208.0	24.7	 16
377	 19	291.8	35.1	 16
378	 19	80.5	16.2	 16
379	 19	68.0	9.5	 16
380	 19	4368.0	777.0	 16
381	 19	493.3	83.9	 16
382	 19	76.5	12.3	 16
383	 19	121.0	23.7	 16
384	 19	1075.5	95.3	 16
385	 19	107.0	13.1	 16
386	 19	76.3	12.7	 16
387	 19	353.8	41.8	 16
388	 19	107.3	14.0	 16
389	 19	53.5	12.8	 16
390	 19	111.3	13.2	 16
391	 19	106.5	22.9	 16
392	 19	97.8	14.7	 16
393	 19	461.5	61.2	 16
394	 19	76.5	11.9	 16
395	 19	492.0	49.1	 16
396	 19	128.8	18.9	 16
397	 19	59.0	7.0	 16
398	 19	73.0	11.5	 16
399	 19	255.5	32.9	 16
400	 19	2154.3	291.9	 16
401	 19	61.0	11.0	 16
402	 19	428.0	62.1	 16
403	 19	235.8	31.7	 16
404	 19	109.8	15.5	 16
405	 19	73.8	11.0	 16
406	 19	66.8	13.1	 16
407	 19	138.5	22.2	 16
408	 19	2215.0	315.9	 16
409	 19	5807.3	273.0	 16
410	 19	65.8	11.5	 16
411	 19	69.3	13.0	 16
412	 19	139.0	13.9	 16
413	 19	73.0	9.2	 16
414	 19	140.8	25.4	 16
415	 19	75.8	16.4	 16
416	 19	118.3	17.5	 16
417	 19	70.0	17.9	 16
418	 19	1926.0	147.1	 16
419	 19	65.5	9.3	 16
420	 19	238.8	20.6	 16
421	 19	81.0	16.3	 16
422	 19	192.0	26.1	 16
423	 19	570.3	66.9	 16
424	 19	366.3	45.0	 16
425	 19	595.8	86.5	 16
426	 19	86.5	15.7	 16
427	 19	205.0	33.2	 16
428	 19	247.8	30.7	 16
429	 19	133.8	21.5	 16
430	 19	72.0	12.5	 16
431	 19	185.3	26.0	 16
432	 19	203.5	39.9	 16
433	 19	90.3	18.0	 16
434	 19	1952.3	321.3	 16
435	 19	72.5	11.7	 16
436	 19	237.3	20.5	 16
437	 19	253.0	25.7	 16
438	 19	67.3	11.1	 16
439	 19	50.3	6.7	 16
440	 19	124.0	19.8	 16
441	 19	215.5	23.2	 16
442	 19	93.5	13.1	 16
443	 19	154.0	20.6	 16
444	 19	365.8	30.4	 16
445	 19	140.0	24.1	 16
446	 19	160.8	27.8	 16
447	 19	100.5	15.5	 16
448	 19	89.0	11.2	 16
449	 19	115.3	17.6	 16
450	 19	54.3	7.1	 16
451	 19	124.0	23.4	 16
452	 19	143.0	21.7	 16
453	 19	52.5	7.3	 16
454	 19	51.8	10.2	 16
455	 19	58.5	8.3	 16
456	 19	121.3	22.3	 16
457	 19	55.0	10.6	 16
458	 19	813.5	195.8	 16
459	 19	92.5	20.5	 16
460	 19	95.8	25.0	 16
461	 19	74.8	11.4	 16
462	 19	109.8	13.7	 16
463	 19	143.3	21.7	 16
464	 19	63.8	11.0	 16
465	 19	65.3	15.4	 16
466	 19	56.5	11.8	 16
467	 19	54.8	10.7	 16
468	 19	840.3	143.2	 16
469	 19	84.8	14.0	 16
470	 19	1304.5	164.1	 20
471	 19	843.3	107.8	 16
472	 19	93.3	17.1	 16
473	 19	139.8	17.3	 16
474	 19	59.0	11.2	 16
475	 19	337.0	63.0	 16
476	 19	409.5	71.4	 16
477	 19	68.0	11.4	 16
478	 19	112.3	22.0	 16
479	 19	122.5	29.8	 16
480	 19	116.3	16.0	 16
481	 19	68.0	14.2	 16
482	 19	105.3	20.2	 16
483	 19	61.5	9.0	 16
484	 19	56.0	9.7	 16
485	 19	468.5	49.4	 16
486	 19	504.0	64.6	 16
487	 19	246.8	37.5	 16
488	 19	746.8	62.3	 16
489	 19	105.8	13.1	 16
490	 19	168.3	24.0	 16
491	 19	107.5	19.9	 16
492	 19	70.0	12.5	 16
493	 19	87.8	13.7	 16
494	 19	83.3	17.1	 16
495	 19	93.5	19.3	 16
496	 19	2033.3	257.4	 16
497	 19	331.5	54.5	 16
498	 19	911.3	140.0	 16
499	 19	58.3	8.1	 16
500	 19	50.3	8.1	 16
501	 19	86.0	18.5	 16
502	 19	66.5	11.5	 16
503	 19	387.8	79.0	 16
504	 19	86.3	18.1	 16
505	 19	80.5	11.9	 16
506	 19	81.8	15.2	 16
507	 19	369.0	50.9	 16
508	 19	81.8	12.5	 16
509	 19	1765.8	354.3	 16
510	 19	311.8	71.8	 16
511	 19	159.0	27.1	 16
512	 19	71.0	17.3	 16
513	 19	55.0	11.8	 16
514	 19	601.3	63.5	 16
515	 19	106.3	15.1	 16
516	 19	74.3	13.1	 16
517	 19	603.5	72.7	 16
518	 19	53.8	10.2	 16
519	 19	49.3	10.5	 16
520	 19	55.3	10.9	 16
521	 19	62.0	10.7	 16
522	 19	57.5	8.9	 16
523	 19	708.3	90.6	 16
524	 19	70.5	12.0	 16
525	 19	232.8	43.0	 16
526	 19	367.0	46.1	 16
527	 19	101.5	13.1	 16
528	 19	101.3	18.3	 16
529	 19	317.0	34.2	 16
530	 19	149.3	29.1	 16
531	 19	726.0	108.2	 16
532	 19	245.3	47.6	 16
533	 19	179.8	24.1	 16
534	 19	112.3	17.2	 16
535	 19	207.0	39.0	 16
536	 19	47.8	7.5	 16
537	 19	96.3	13.6	 16
538	 19	54.0	8.7	 16
539	 19	289.3	49.0	 16
540	 19	240.5	54.0	 16
541	 19	82.0	14.1	 16
542	 19	104.0	18.3	 16
543	 19	436.3	50.8	 16
544	 19	74.0	12.4	 16
545	 19	249.3	30.5	 16
546	 19	91.8	15.5	 16
547	 19	58.3	10.1	 16
548	 19	257.0	29.7	 16
549	 19	330.5	35.0	 16
550	 19	71.3	11.6	 16
551	 19	87.8	16.7	 16
552	 19	51.8	8.9	 16
553	 19	113.8	21.7	 16
554	 19	66.8	11.4	 16
555	 19	63.5	13.1	 16
556	 19	103.3	20.5	 16
557	 19	794.3	133.4	 16
558	 19	63.3	8.5	 16
559	 19	1385.5	151.7	 16
560	 19	200.3	20.1	 16
561	 19	62.8	12.5	 16
562	 19	245.8	37.8	 16
563	 19	264.8	41.0	 16
564	 19	87.0	26.6	 16
565	 19	60.3	11.1	 16
566	 19	1494.0	339.3	 16
567	 19	75.8	10.9	 16
568	 19	664.8	62.5	 16
569	 19	77.5	15.1	 16
570	 19	85.8	15.1	 16
571	 19	103.8	24.4	 16
572	 19	87.0	14.9	 16
573	 19	95.0	15.1	 16
574	 19	137.5	27.1	 16
575	 19	87.3	12.3	 16
576	 19	74.5	21.1	 16
577	 19	67.8	16.4	 16
578	 19	140.3	29.7	 16
579	 19	270.5	33.2	 16
580	 19	380.3	44.3	 16
581	 19	531.0	39.9	 16
582	 19	125.5	18.1	 16
583	 19	463.0	105.4	 16
584	 19	92.8	19.4	 16
585	 19	142.5	34.6	 16
586	 19	1218.0	330.8	 16
587	 19	3100.3	973.7	 16
588	 19	315.3	72.2	 16
589	 19	61.3	10.5	 20
590	 19	131.3	20.0	 16
591	 19	374.5	62.9	 16
592	 19	104.0	16.5	 16
593	 19	293.5	31.7	 16
594	 19	71.5	14.0	 16
595	 19	60.5	9.4	 16
596	 19	356.8	34.4	 16
597	 19	2653.8	193.8	 16
598	 19	67.3	11.6	 16
599	 19	130.0	18.9	 16
600	 19	120.0	18.4	 16
601	 19	78.0	11.7	 16
602	 19	443.8	50.3	 16
603	 19	213.5	33.4	 16
604	 19	80.3	14.9	 16
605	 19	116.8	16.9	 16
606	 19	81.8	14.7	 16
607	 19	292.8	40.5	 16
608	 19	512.0	60.4	 16
609	 19	86.0	13.8	 16
610	 19	90.5	12.8	 16
611	 19	116.3	14.5	 16
612	 19	72.3	10.5	 16
613	 19	137.5	26.6	 16
614	 19	455.0	89.5	 16
615	 19	1107.8	123.0	 16
616	 19	451.3	48.5	 16
617	 19	1875.0	296.2	 16
618	 19	255.5	41.3	 16
619	 19	68.8	8.3	 16
620	 19	55.8	8.6	 16
621	 19	72.5	15.9	 16
622	 19	541.5	73.5	 16
623	 19	151.3	26.9	 16
624	 19	179.3	22.0	 16
625	 19	126.0	14.7	 16
626	 19	228.3	31.1	 16
627	 19	51.3	8.1	 16
628	 19	58.8	10.0	 16
629	 19	144.8	16.1	 16
630	 19	71.5	12.3	 16
631	 19	87.3	11.4	 16
632	 19	113.5	17.2	 16
633	 19	215.5	23.6	 16
634	 19	337.5	44.1	 16
635	 19	442.5	57.8	 16
636	 19	132.8	12.5	 16
637	 19	73.8	11.2	 16
638	 19	73.3	14.2	 16
639	 19	131.0	22.0	 16
640	 19	198.8	28.4	 16
641	 19	1232.0	143.7	 16
642	 19	531.3	68.7	 16
643	 19	550.8	87.4	 16
644	 19	268.3	34.3	 16
645	 19	144.0	32.8	 16
646	 19	117.5	23.4	 16
647	 19	278.8	27.9	 16
648	 19	772.5	65.1	 16
649	 19	151.0	18.0	 16
650	 19	216.5	26.6	 16
651	 19	202.5	24.9	 16
652	 19	122.0	16.9	 16
653	 19	152.0	24.2	 16
654	 19	506.8	55.6	 16
655	 19	123.0	19.5	 16
656	 19	66.3	9.6	 16
657	 19	108.8	19.7	 16
658	 19	76.3	14.8	 16
659	 19	77.8	13.9	 16
660	 19	203.5	37.6	 16
661	 19	140.5	21.7	 16
662	 19	130.0	23.5	 16
663	 19	56.3	11.0	 16
664	 19	57.0	12.5	 16
665	 19	52.8	11.7	 16
666	 19	364.3	45.8	 16
667	 19	84.0	14.8	 16
668	 19	56.3	6.1	 16
669	 19	519.0	119.5	 16
670	 19	84.8	17.3	 16
671	 19	147.0	18.7	 16
672	 19	72.0	13.0	 16
673	 19	54.0	8.5	 16
674	 19	80.0	14.8	 16
675	 19	68.5	11.2	 16
676	 19	299.5	44.0	 16
677	 19	187.8	27.5	 16
678	 19	53.8	6.3	 16
679	 19	62.8	11.5	 16
680	 19	53.3	8.7	 16
681	 19	62.5	12.8	 16
682	 19	61.8	11.5	 16
683	 19	657.3	103.8	 16
684	 19	240.8	45.4	 16
685	 19	262.0	52.5	 16
686	 19	59.3	8.0	 16
687	 19	76.0	16.0	 16
688	 19	186.5	33.4	 16
689	 19	286.3	66.0	 16
690	 19	255.5	55.5	 16
691	 19	58.0	10.1	 16
692	 19	283.5	47.7	 16
693	 19	296.8	48.9	 16
694	 19	141.3	21.9	 16
695	 19	191.3	34.9	 16
696	 19	1639.8	441.1	 16
697	 19	85.3	14.9	 16
698	 19	74.3	11.7	 16
699	 19	127.5	26.4	 16
700	 19	100.0	12.8	 16
701	 19	70.0	14.1	 16
702	 19	86.5	14.7	 16
703	 19	69.8	9.4	 16
704	 19	1656.8	288.1	 16
705	 19	55.3	10.5	 16
706	 19	64.5	10.4	 16
707	 19	236.8	40.2	 20
708	 19	559.3	55.8	 16
709	 19	426.8	45.1	 16
710	 19	232.0	25.8	 16
711	 19	91.3	14.0	 16
  0	 20	7901.5	796.3	 16
  1	 20	119.8	15.8	 16
  2	 20	82.8	15.4	 16
  3	 20	174.8	29.5	 16
  4	 20	427.5	39.3	 16
  5	 20	90.3	13.0	 16
  6	 20	70.5	13.3	 16
  7	 20	57.8	11.0	 16
  8	 20	64.8	11.3	 16
  9	 20	52.0	11.4	 16
 10	 20	64.5	9.7	 16
 11	 20	83.8	22.3	 16
 12	 20	88.3	8.6	 16
 13	 20	133.0	16.5	 16
 14	 20	199.8	29.2	 16
 15	 20	192.0	13.9	 16
 16	 20	176.0	31.5	 16
 17	 20	240.5	31.1	 16
 18	 20	342.8	41.1	 16
 19	 20	166.3	19.5	 16
 20	 20	154.8	26.9	 16
 21	 20	105.5	19.3	 16
 22	 20	103.3	18.9	 16
 23	 20	140.0	22.3	 16
 24	 20	183.0	25.2	 16
 25	 20	117.3	19.8	 16
 26	 20	65.8	10.9	 16
 27	 20	112.5	16.3	 16
 28	 20	70.5	13.1	 16
 29	 20	56.3	10.0	 16
 30	 20	61.0	11.2	 16
 31	 20	175.0	28.0	 16
 32	 20	65.8	8.0	 16
 33	 20	94.3	15.9	 16
 34	 20	98.3	16.2	 16
 35	 20	499.3	55.4	 16
 36	 20	89.8	16.8	 16
 37	 20	72.5	13.1	 16
 38	 20	381.5	132.1	 16
 39	 20	179.5	47.5	 16
 40	 20	175.8	31.0	 16
 41	 20	60.0	15.5	 16
 42	 20	58.8	10.6	 16
 43	 20	78.5	12.6	 16
 44	 20	160.3	22.9	 16
 45	 20	69.0	12.4	 16
 46	 20	65.5	12.5	 16
 47	 20	122.3	21.6	 16
 48	 20	252.0	27.4	 16
 49	 20	422.5	46.3	 16
 50	 20	62.0	9.3	 16
 51	 20	120.8	23.1	 16
 52	 20	95.5	11.9	 16
 53	 20	281.5	36.7	 16
 54	 20	104.8	19.5	 16
 55	 20	253.0	26.5	 16
 56	 20	315.5	44.6	 16
 57	 20	114.3	12.8	 16
 58	 20	216.5	24.6	 16
 59	 20	248.3	19.5	 16
 60	 20	458.0	69.2	 16
 61	 20	92.0	17.3	 16
 62	 20	230.8	26.3	 16
 63	 20	470.3	50.5	 16
 64	 20	155.3	23.8	 16
 65	 20	105.0	13.6	 16
 66	 20	57.5	9.8	 16
 67	 20	59.0	12.9	 16
 68	 20	69.5	10.4	 16
 69	 20	144.0	21.2	 16
 70	 20	391.8	33.3	 16
 71	 20	141.0	15.8	 16
 72	 20	117.3	17.2	 16
 73	 20	276.3	33.8	 16
 74	 20	136.0	31.5	 16
 75	 20	91.3	16.0	 16
 76	 20	115.3	17.0	 16
 77	 20	302.5	38.3	 16
 78	 20	130.3	17.4	 16
 79	 20	56.0	8.7	 16
 80	 20	60.3	11.7	 16
 81	 20	56.8	9.2	 16
 82	 20	56.0	8.3	 16
 83	 20	207.0	21.6	 16
 84	 20	142.0	17.7	 16
 85	 20	123.3	18.9	 16
 86	 20	72.8	12.0	 16
 87	 20	675.3	96.4	 16
 88	 20	127.3	26.8	 16
 89	 20	87.8	13.7	 16
 90	 20	411.5	54.0	 16
 91	 20	192.0	49.8	 16
 92	 20	64.5	10.5	 16
 93	 20	80.3	15.4	 16
 94	 20	69.5	12.1	 16
 95	 20	69.5	11.0	 16
 96	 20	293.3	35.8	 16
 97	 20	70.5	9.8	 16
 98	 20	169.0	26.9	 16
 99	 20	134.3	18.8	 16
100	 20	92.3	11.2	 16
101	 20	89.0	16.6	 16
102	 20	762.3	86.1	 16
103	 20	441.0	34.8	 16
104	 20	326.8	29.0	 16
105	 20	116.5	14.4	 16
106	 20	79.5	14.6	 16
107	 20	94.3	15.9	 16
108	 20	66.5	11.0	 16
109	 20	98.3	18.7	 16
110	 20	64.3	10.7	 16
111	 20	72.0	18.2	 16
112	 20	91.8	16.5	 16
113	 20	215.8	43.4	 16
114	 20	66.5	8.6	 16
115	 20	70.0	8.2	 16
116	 20	75.5	14.4	 16
117	 20	66.0	13.8	 20
118	 20	53.0	10.1	 16
119	 20	207.3	29.0	 16
120	 20	63.3	9.1	 16
121	 20	52.8	8.9	 16
122	 20	51.5	9.4	 16
123	 20	86.3	14.6	 16
124	 20	72.0	13.0	 16
125	 20	80.8	17.4	 16
126	 20	764.0	72.2	 16
127	 20	936.5	137.4	 16
128	 20	281.8	45.3	 16
129	 20	61.8	11.3	 16
130	 20	55.8	8.2	 16
131	 20	270.0	26.8	 16
132	 20	95.3	13.8	 16
133	 20	57.3	10.8	 16
134	 20	59.5	10.3	 16
135	 20	61.8	13.3	 16
136	 20	59.3	10.4	 16
137	 20	73.8	16.9	 16
138	 20	201.8	18.4	 16
139	 20	113.3	14.8	 16
140	 20	145.8	25.0	 16
141	 20	361.8	59.9	 16
142	 20	62.5	12.0	 16
143	 20	97.0	14.6	 16
144	 20	52.5	10.1	 16
145	 20	93.8	17.4	 16
146	 20	70.5	20.7	 16
147	 20	51.5	10.3	 16
148	 20	57.3	10.2	 16
149	 20	68.3	10.8	 16
150	 20	141.8	22.1	 16
151	 20	233.8	31.7	 16
152	 20	79.8	21.5	 16
153	 20	90.5	13.7	 16
154	 20	253.5	36.8	 16
155	 20	186.3	28.5	 16
156	 20	87.5	13.8	 16
157	 20	142.0	16.8	 16
158	 20	73.5	10.0	 16
159	 20	102.5	15.8	 16
160	 20	220.0	30.4	 16
161	 20	71.3	13.5	 16
162	 20	255.5	21.5	 16
163	 20	692.0	66.5	 16
164	 20	118.8	25.1	 16
165	 20	61.5	10.5	 16
166	 20	121.5	19.5	 16
167	 20	63.3	13.8	 16
168	 20	173.3	25.1	 16
169	 20	60.8	11.3	 16
170	 20	114.0	19.2	 16
171	 20	479.8	53.5	 16
172	 20	98.3	18.1	 16
173	 20	271.3	37.2	 16
174	 20	98.8	18.5	 16
175	 20	65.3	10.7	 16
176	 20	64.5	12.6	 16
177	 20	57.3	8.9	 16
178	 20	149.0	20.3	 16
179	 20	141.3	20.9	 16
180	 20	132.3	17.7	 16
181	 20	87.3	10.3	 16
182	 20	57.5	8.8	 16
183	 20	116.0	17.8	 16
184	 20	72.3	12.0	 16
185	 20	64.3	14.5	 16
186	 20	66.3	9.5	 16
187	 20	168.3	24.3	 16
188	 20	57.3	11.7	 16
189	 20	62.3	10.2	 16
190	 20	60.3	13.4	 16
191	 20	75.3	13.6	 16
192	 20	92.0	17.9	 16
193	 20	125.3	24.1	 16
194	 20	75.0	14.2	 16
195	 20	151.0	16.8	 16
196	 20	54.8	8.9	 16
197	 20	114.5	18.3	 16
198	 20	148.5	19.2	 16
199	 20	134.8	19.5	 16
200	 20	117.5	15.6	 16
201	 20	445.5	64.4	 16
202	 20	209.5	25.4	 16
203	 20	75.8	8.2	 16
204	 20	65.0	9.6	 16
205	 20	79.5	15.5	 16
206	 20	72.0	11.2	 16
207	 20	60.0	11.4	 16
208	 20	305.5	48.3	 16
209	 20	60.0	8.6	 16
210	 20	57.0	10.5	 16
211	 20	76.3	11.7	 16
212	 20	61.0	13.3	 16
213	 20	61.8	10.6	 16
214	 20	66.5	11.8	 16
215	 20	108.0	26.3	 16
216	 20	50.0	6.4	 16
217	 20	72.5	13.6	 16
218	 20	73.0	11.0	 16
219	 20	73.0	16.4	 16
220	 20	67.8	9.5	 16
221	 20	99.0	21.1	 16
222	 20	79.0	16.9	 16
223	 20	52.5	6.8	 16
224	 20	89.0	15.1	 16
225	 20	48.8	10.1	 16
226	 20	55.0	12.7	 16
227	 20	252.3	37.9	 16
228	 20	84.3	14.6	 16
229	 20	305.3	48.7	 16
230	 20	79.3	12.2	 16
231	 20	64.5	13.2	 16
232	 20	58.0	8.2	 16
233	 20	66.8	13.7	 16
234	 20	62.3	11.1	 16
235	 20	125.3	15.0	 16
236	 20	59.5	12.2	 20
237	 20	72.8	18.9	 16
238	 20	650.5	124.8	 16
239	 20	69.5	10.1	 16
240	 20	67.0	9.3	 16
241	 20	75.3	10.2	 16
242	 20	56.3	10.7	 16
243	 20	77.3	15.5	 16
244	 20	106.0	19.8	 16
245	 20	66.5	10.7	 16
246	 20	90.8	15.1	 16
247	 20	50.0	10.2	 16
248	 20	836.8	177.6	 16
249	 20	65.8	14.3	 16
250	 20	60.5	9.0	 16
251	 20	61.0	12.0	 16
252	 20	63.5	15.5	 16
253	 20	65.8	12.9	 16
254	 20	114.8	102.6	 16
255	 20	59.3	9.5	 16
256	 20	62.3	11.7	 16
257	 20	57.3	9.4	 16
258	 20	58.8	10.3	 16
259	 20	81.0	12.2	 16
260	 20	97.5	20.2	 16
261	 20	249.0	38.5	 16
262	 20	245.3	35.7	 16
263	 20	57.0	10.6	 16
264	 20	68.0	8.3	 16
265	 20	81.3	13.2	 16
266	 20	100.5	21.4	 16
267	 20	91.5	9.2	 16
268	 20	80.0	14.1	 16
269	 20	74.5	15.0	 16
270	 20	106.5	16.5	 16
271	 20	482.8	66.9	 16
272	 20	472.5	34.9	 16
273	 20	58.5	10.3	 16
274	 20	81.3	13.9	 16
275	 20	104.5	15.9	 16
276	 20	109.0	17.1	 16
277	 20	58.8	9.2	 16
278	 20	66.5	18.5	 16
279	 20	77.5	10.1	 16
280	 20	91.8	19.6	 16
281	 20	62.3	12.7	 16
282	 20	55.0	10.4	 16
283	 20	70.8	13.6	 16
284	 20	53.3	9.5	 16
285	 20	57.0	16.7	 16
286	 20	53.5	9.4	 16
287	 20	86.8	14.4	 16
288	 20	70.8	14.8	 16
289	 20	79.0	11.4	 16
290	 20	235.3	25.7	 16
291	 20	118.3	19.2	 16
292	 20	59.3	10.8	 16
293	 20	94.3	15.1	 16
294	 20	134.3	18.0	 16
295	 20	70.5	15.2	 16
296	 20	77.5	14.3	 16
297	 20	61.5	10.8	 16
298	 20	69.8	10.5	 16
299	 20	85.0	12.8	 16
300	 20	69.0	15.4	 16
301	 20	61.8	23.2	 16
302	 20	87.3	16.5	 16
303	 20	169.8	13.2	 16
304	 20	179.5	21.3	 16
305	 20	119.8	21.8	 16
306	 20	113.8	23.3	 16
307	 20	72.0	12.1	 16
308	 20	76.5	13.6	 16
309	 20	72.3	15.0	 16
310	 20	62.3	13.4	 16
311	 20	47.3	8.3	 16
312	 20	183.5	25.5	 16
313	 20	61.3	11.9	 16
314	 20	74.0	9.6	 16
315	 20	76.0	14.8	 16
316	 20	58.3	8.5	 16
317	 20	74.0	11.7	 16
318	 20	99.5	16.0	 16
319	 20	66.8	12.6	 16
320	 20	130.5	21.6	 16
321	 20	545.0	32.3	 16
322	 20	157.0	19.0	 16
323	 20	154.3	18.4	 16
324	 20	113.8	18.8	 16
325	 20	63.3	11.0	 16
326	 20	179.3	28.1	 16
327	 20	84.0	16.5	 16
328	 20	54.3	7.8	 16
329	 20	52.0	10.6	 16
330	 20	60.3	12.6	 16
331	 20	72.0	10.6	 16
332	 20	52.5	9.8	 16
333	 20	131.8	16.4	 16
334	 20	95.3	12.7	 16
335	 20	843.5	75.0	 16
336	 20	62.0	10.6	 16
337	 20	51.3	9.4	 16
338	 20	115.5	18.7	 16
339	 20	82.5	17.7	 16
340	 20	72.3	12.9	 16
341	 20	47.3	9.6	 16
342	 20	53.5	10.4	 16
343	 20	63.3	11.9	 16
344	 20	58.5	13.3	 16
345	 20	50.0	4.8	 16
346	 20	53.0	8.8	 16
347	 20	58.3	8.9	 16
348	 20	147.5	23.2	 16
349	 20	84.0	11.8	 16
350	 20	60.5	9.4	 16
351	 20	115.3	18.7	 16
352	 20	58.5	10.2	 16
353	 20	75.3	9.7	 16
354	 20	66.8	9.7	 20
355	 20	83.8	17.9	 16
356	 20	119.3	18.3	 16
357	 20	188.8	19.8	 16
358	 20	886.3	100.2	 16
359	 20	300.3	24.7	 16
360	 20	76.3	11.3	 16
361	 20	95.5	12.1	 16
362	 20	58.3	8.0	 16
363	 20	60.3	11.4	 16
364	 20	132.5	20.1	 16
365	 20	118.3	15.5	 16
366	 20	697.5	64.5	 16
367	 20	104.3	20.8	 16
368	 20	57.5	12.1	 16
369	 20	215.5	27.1	 16
370	 20	65.0	9.9	 16
371	 20	91.3	14.5	 16
372	 20	61.8	13.3	 16
373	 20	79.3	16.8	 16
374	 20	73.0	12.9	 16
375	 20	65.3	12.7	 16
376	 20	86.8	17.6	 16
377	 20	135.0	19.4	 16
378	 20	51.0	8.5	 16
379	 20	69.5	10.9	 16
380	 20	426.5	60.1	 16
381	 20	105.0	19.8	 16
382	 20	55.5	9.0	 16
383	 20	116.8	18.2	 16
384	 20	95.3	17.2	 16
385	 20	85.3	11.2	 16
386	 20	58.0	10.2	 16
387	 20	120.5	16.0	 16
388	 20	62.8	12.7	 16
389	 20	52.5	7.4	 16
390	 20	58.3	8.7	 16
391	 20	59.8	10.3	 16
392	 20	116.5	18.8	 16
393	 20	81.0	11.1	 16
394	 20	66.5	13.1	 16
395	 20	384.0	29.6	 16
396	 20	83.0	12.0	 16
397	 20	64.3	8.6	 16
398	 20	63.0	13.4	 16
399	 20	205.0	18.6	 16
400	 20	285.3	49.6	 16
401	 20	59.8	9.9	 16
402	 20	84.3	10.1	 16
403	 20	68.0	12.4	 16
404	 20	65.3	9.2	 16
405	 20	55.3	10.0	 16
406	 20	57.5	9.6	 16
407	 20	76.3	11.2	 16
408	 20	709.8	79.7	 16
409	 20	2268.0	263.3	 16
410	 20	60.5	11.3	 16
411	 20	102.8	17.4	 16
412	 20	348.3	42.2	 16
413	 20	102.3	15.8	 16
414	 20	184.8	27.6	 16
415	 20	77.5	16.8	 16
416	 20	133.5	22.9	 16
417	 20	81.3	9.4	 16
418	 20	166.3	25.6	 16
419	 20	59.0	7.6	 16
420	 20	237.8	22.6	 16
421	 20	59.5	15.6	 16
422	 20	62.5	9.0	 16
423	 20	203.0	21.2	 16
424	 20	219.0	24.7	 16
425	 20	95.3	20.4	 16
426	 20	75.5	11.7	 16
427	 20	139.3	23.4	 16
428	 20	197.8	27.9	 16
429	 20	131.5	20.1	 16
430	 20	61.3	8.6	 16
431	 20	166.0	20.7	 16
432	 20	100.3	20.1	 16
433	 20	79.0	13.5	 16
434	 20	431.8	73.3	 16
435	 20	58.0	7.6	 16
436	 20	92.3	15.6	 16
437	 20	78.5	12.1	 16
438	 20	58.0	10.3	 16
439	 20	54.0	10.4	 16
440	 20	64.3	10.4	 16
441	 20	92.3	22.0	 16
442	 20	135.0	17.9	 16
443	 20	68.8	10.0	 16
444	 20	209.0	28.1	 16
445	 20	138.3	23.4	 16
446	 20	165.3	19.6	 16
447	 20	75.3	14.0	 16
448	 20	74.5	12.2	 16
449	 20	113.0	18.7	 16
450	 20	62.0	11.7	 16
451	 20	73.5	15.6	 16
452	 20	71.8	11.6	 16
453	 20	50.3	10.4	 16
454	 20	61.3	11.2	 16
455	 20	58.5	10.9	 16
456	 20	94.3	14.6	 16
457	 20	57.0	11.2	 16
458	 20	119.0	28.3	 16
459	 20	63.3	17.2	 16
460	 20	69.5	16.4	 16
461	 20	85.3	16.2	 16
462	 20	109.5	14.8	 16
463	 20	141.3	21.0	 16
464	 20	62.5	10.6	 16
465	 20	47.5	8.0	 16
466	 20	55.3	10.7	 16
467	 20	53.5	11.3	 16
468	 20	142.3	22.4	 16
469	 20	65.3	11.6	 16
470	 20	190.8	24.4	 16
471	 20	550.3	58.5	 16
472	 20	59.8	16.5	 16
473	 20	80.0	15.0	 20
474	 20	55.0	9.6	 16
475	 20	72.0	9.2	 16
476	 20	84.0	12.4	 16
477	 20	64.5	16.5	 16
478	 20	65.0	8.7	 16
479	 20	66.3	11.8	 16
480	 20	210.5	33.4	 16
481	 20	65.8	14.9	 16
482	 20	57.8	10.2	 16
483	 20	46.3	7.2	 16
484	 20	67.0	12.0	 16
485	 20	435.5	53.0	 16
486	 20	441.8	36.9	 16
487	 20	366.3	32.5	 16
488	 20	602.5	84.5	 16
489	 20	172.3	28.8	 16
490	 20	59.5	9.7	 16
491	 20	181.3	19.8	 16
492	 20	62.0	9.7	 16
493	 20	117.5	22.8	 16
494	 20	123.3	30.5	 16
495	 20	59.3	9.1	 16
496	 20	209.3	25.5	 16
497	 20	61.3	11.8	 16
498	 20	135.5	18.4	 16
499	 20	59.8	11.4	 16
500	 20	46.0	8.9	 16
501	 20	75.0	12.7	 16
502	 20	58.0	9.6	 16
503	 20	93.5	16.9	 16
504	 20	107.0	18.6	 16
505	 20	88.3	17.1	 16
506	 20	81.5	15.9	 16
507	 20	196.5	29.2	 16
508	 20	67.5	14.9	 16
509	 20	253.3	40.9	 16
510	 20	86.3	17.3	 16
511	 20	145.0	21.0	 16
512	 20	63.0	12.9	 16
513	 20	59.5	12.9	 16
514	 20	70.0	14.4	 16
515	 20	57.3	8.3	 16
516	 20	77.5	14.4	 16
517	 20	97.3	19.8	 16
518	 20	48.5	8.0	 16
519	 20	52.5	8.3	 16
520	 20	56.3	8.3	 16
521	 20	53.8	9.0	 16
522	 20	52.0	8.5	 16
523	 20	186.5	17.8	 16
524	 20	61.3	9.9	 16
525	 20	83.3	12.9	 16
526	 20	77.3	15.2	 16
527	 20	67.5	13.3	 16
528	 20	172.8	22.7	 16
529	 20	552.3	50.1	 16
530	 20	121.3	19.9	 16
531	 20	274.8	26.9	 16
532	 20	95.3	16.1	 16
533	 20	70.0	12.7	 16
534	 20	66.3	9.3	 16
535	 20	59.3	14.3	 16
536	 20	70.3	11.9	 16
537	 20	93.5	18.1	 16
538	 20	59.8	11.2	 16
539	 20	73.8	13.9	 16
540	 20	94.5	13.3	 16
541	 20	63.3	24.2	 16
542	 20	85.0	14.3	 16
543	 20	149.0	23.3	 16
544	 20	55.0	10.1	 16
545	 20	54.8	9.8	 16
546	 20	69.5	15.1	 16
547	 20	73.8	14.5	 16
548	 20	63.8	10.2	 16
549	 20	100.3	12.4	 16
550	 20	67.8	10.8	 16
551	 20	61.0	10.7	 16
552	 20	50.3	5.9	 16
553	 20	115.0	21.2	 16
554	 20	69.0	13.1	 16
555	 20	51.5	10.4	 16
556	 20	71.8	13.0	 16
557	 20	117.0	15.6	 16
558	 20	59.3	10.0	 16
559	 20	209.5	31.6	 16
560	 20	118.0	23.6	 16
561	 20	71.0	12.5	 16
562	 20	108.5	13.7	 16
563	 20	72.8	14.6	 16
564	 20	87.5	17.5	 16
565	 20	63.3	10.1	 16
566	 20	143.8	27.4	 16
567	 20	54.0	9.4	 16
568	 20	580.3	68.2	 16
569	 20	66.8	19.5	 16
570	 20	59.0	13.0	 16
571	 20	127.8	21.5	 16
572	 20	68.3	8.5	 16
573	 20	62.8	13.1	 16
574	 20	88.0	12.2	 16
575	 20	67.8	9.8	 16
576	 20	270.8	43.8	 16
577	 20	69.5	12.8	 16
578	 20	73.3	11.8	 16
579	 20	114.0	22.2	 16
580	 20	361.0	29.7	 16
581	 20	559.5	48.0	 16
582	 20	88.8	15.0	 16
583	 20	114.5	19.3	 16
584	 20	67.0	14.0	 16
585	 20	84.0	13.2	 16
586	 20	424.3	67.7	 16
587	 20	233.8	57.9	 16
588	 20	72.8	11.4	 16
589	 20	52.5	10.0	 16
590	 20	228.0	45.2	 16
591	 20	87.0	13.5	 16
592	 20	120.0	14.7	 20
593	 20	89.8	15.1	 16
594	 20	53.8	7.9	 16
595	 20	104.8	17.1	 16
596	 20	65.3	8.5	 16
597	 20	345.5	52.9	 16
598	 20	65.3	15.1	 16
599	 20	121.5	13.9	 16
600	 20	141.0	21.6	 16
601	 20	142.8	20.9	 16
602	 20	511.8	39.5	 16
603	 20	159.8	24.1	 16
604	 20	71.0	14.2	 16
605	 20	83.5	13.8	 16
606	 20	106.5	13.9	 16
607	 20	237.3	30.1	 16
608	 20	564.5	23.9	 16
609	 20	93.0	15.3	 16
610	 20	73.0	14.7	 16
611	 20	54.5	8.9	 16
612	 20	53.8	9.6	 16
613	 20	57.0	6.7	 16
614	 20	70.0	8.8	 16
615	 20	255.8	35.7	 16
616	 20	289.8	37.0	 16
617	 20	237.0	38.7	 16
618	 20	124.3	18.8	 16
619	 20	78.5	15.8	 16
620	 20	53.0	8.0	 16
621	 20	56.3	11.4	 16
622	 20	97.5	18.9	 16
623	 20	65.3	10.4	 16
624	 20	62.3	12.1	 16
625	 20	77.3	12.0	 16
626	 20	80.8	12.5	 16
627	 20	52.5	10.8	 16
628	 20	52.3	8.5	 16
629	 20	112.3	13.0	 16
630	 20	63.3	12.6	 16
631	 20	143.8	19.6	 16
632	 20	126.8	24.3	 16
633	 20	106.8	20.2	 16
634	 20	107.3	17.2	 16
635	 20	101.3	16.9	 16
636	 20	248.0	31.1	 16
637	 20	65.3	9.6	 16
638	 20	62.5	13.4	 16
639	 20	101.8	20.9	 16
640	 20	139.0	22.3	 16
641	 20	1609.3	82.6	 16
642	 20	591.0	44.3	 16
643	 20	540.8	40.1	 16
644	 20	688.8	74.1	 16
645	 20	155.5	22.1	 16
646	 20	121.5	17.9	 16
647	 20	196.0	87.9	 16
648	 20	460.0	41.1	 16
649	 20	174.5	23.8	 16
650	 20	138.8	24.2	 16
651	 20	315.0	45.1	 16
652	 20	166.5	20.2	 16
653	 20	81.3	13.5	 16
654	 20	101.8	13.0	 16
655	 20	72.5	13.2	 16
656	 20	65.5	13.3	 16
657	 20	95.8	19.9	 16
658	 20	86.8	9.1	 16
659	 20	81.3	11.9	 16
660	 20	64.0	11.7	 16
661	 20	80.5	14.8	 16
662	 20	63.3	10.9	 16
663	 20	59.0	7.8	 16
664	 20	50.3	8.3	 16
665	 20	48.5	7.6	 16
666	 20	181.0	33.8	 16
667	 20	76.3	8.7	 16
668	 20	55.5	10.3	 16
669	 20	168.5	30.3	 16
670	 20	60.3	14.1	 16
671	 20	367.3	35.6	 16
672	 20	70.8	16.8	 16
673	 20	47.3	6.0	 16
674	 20	60.3	10.5	 16
675	 20	64.8	11.8	 16
676	 20	102.5	10.3	 16
677	 20	68.0	13.7	 16
678	 20	57.8	12.8	 16
679	 20	53.0	14.4	 16
680	 20	49.3	9.2	 16
681	 20	53.0	9.6	 16
682	 20	69.8	16.2	 16
683	 20	71.8	10.8	 16
684	 20	63.0	14.0	 16
685	 20	73.3	15.0	 16
686	 20	91.3	18.9	 16
687	 20	73.0	13.7	 16
688	 20	63.3	7.1	 16
689	 20	195.3	31.7	 16
690	 20	81.5	12.1	 16
691	 20	59.3	11.0	 16
692	 20	444.0	57.4	 16
693	 20	416.5	27.9	 16
694	 20	119.3	18.1	 16
695	 20	140.8	21.9	 16
696	 20	132.5	28.1	 16
697	 20	63.5	8.8	 16
698	 20	70.0	14.7	 16
699	 20	89.8	15.3	 16
700	 20	122.3	25.5	 16
701	 20	61.5	9.3	 16
702	 20	69.0	9.9	 16
703	 20	91.3	13.3	 16
704	 20	563.0	84.9	 16
705	 20	60.8	12.8	 16
706	 20	74.3	16.0	 16
707	 20	146.3	21.4	 16
708	 20	134.5	21.2	 16
709	 20	162.3	21.2	 16
710	 20	95.3	10.6	 20
711	 20	5988.3	605.2	 16
  0	 21	94.5	15.4	 16
  1	 21	295.0	43.0	 20
  2	 21	762.3	89.7	 16
  3	 21	102.0	15.0	 16
  4	 21	100.5	12.0	 16
  5	 21	158.3	28.4	 16
  6	 21	104.5	19.0	 16
  7	 21	198.0	20.3	 16
  8	 21	375.0	66.4	 16
  9	 21	145.0	28.7	 16
 10	 21	191.3	23.5	 16
 11	 21	82.5	15.7	 16
 12	 21	184.0	36.0	 16
 13	 21	95.3	11.9	 16
 14	 21	205.0	29.8	 16
 15	 21	2494.8	220.6	 16
 16	 21	85.0	16.6	 16
 17	 21	84.0	13.1	 16
 18	 21	97.5	21.3	 16
 19	 21	273.0	42.7	 16
 20	 21	306.5	42.9	 16
 21	 21	93.3	17.4	 16
 22	 21	318.5	45.0	 16
 23	 21	63.5	11.3	 16
 24	 21	163.5	24.3	 16
 25	 21	386.3	55.1	 16
 26	 21	56.5	10.3	 16
 27	 21	110.0	17.3	 16
 28	 21	82.5	16.6	 16
 29	 21	65.3	14.1	 16
 30	 21	310.0	30.3	 16
 31	 21	412.5	56.2	 16
 32	 21	61.8	15.7	 16
 33	 21	1680.0	345.6	 16
 34	 21	624.5	107.5	 16
 35	 21	60.8	12.5	 16
 36	 21	76.3	15.4	 16
 37	 21	51.3	7.9	 16
 38	 21	180.3	29.0	 16
 39	 21	161.5	22.0	 16
 40	 21	362.5	34.7	 16
 41	 21	202.0	27.4	 16
 42	 21	66.5	11.5	 16
 43	 21	75.3	13.3	 16
 44	 21	67.0	17.4	 16
 45	 21	61.0	9.0	 16
 46	 21	79.5	12.5	 16
 47	 21	135.3	18.8	 16
 48	 21	160.0	16.8	 16
 49	 21	232.8	29.7	 16
 50	 21	68.3	12.5	 16
 51	 21	520.0	46.6	 16
 52	 21	556.0	72.9	 16
 53	 21	65.5	10.3	 16
 54	 21	107.5	13.0	 16
 55	 21	391.5	69.0	 16
 56	 21	332.3	35.5	 16
 57	 21	595.5	52.6	 16
 58	 21	1665.3	198.5	 16
 59	 21	406.3	60.0	 16
 60	 21	84.3	14.1	 16
 61	 21	114.8	24.3	 16
 62	 21	105.0	17.7	 16
 63	 21	465.8	84.3	 16
 64	 21	70.0	17.6	 16
 65	 21	81.0	17.5	 16
 66	 21	101.0	17.6	 16
 67	 21	59.5	11.3	 16
 68	 21	136.8	19.8	 16
 69	 21	286.5	30.6	 16
 70	 21	1827.3	136.9	 16
 71	 21	65.3	7.3	 16
 72	 21	82.8	9.7	 16
 73	 21	4710.0	336.1	 16
 74	 21	1374.3	122.2	 16
 75	 21	514.3	49.4	 16
 76	 21	105.8	13.6	 16
 77	 21	106.0	16.2	 16
 78	 21	123.3	14.1	 16
 79	 21	76.3	10.3	 16
 80	 21	145.3	18.4	 16
 81	 21	83.5	12.5	 16
 82	 21	105.5	21.7	 16
 83	 21	585.3	62.4	 16
 84	 21	1708.8	221.4	 16
 85	 21	131.3	21.7	 16
 86	 21	141.5	20.9	 16
 87	 21	153.0	17.0	 16
 88	 21	181.3	28.4	 16
 89	 21	80.3	15.9	 16
 90	 21	103.3	15.1	 16
 91	 21	128.3	18.5	 16
 92	 21	210.0	35.1	 16
 93	 21	403.0	38.6	 16
 94	 21	1109.3	113.9	 16
 95	 21	1237.3	54.9	 16
 96	 21	114.3	19.7	 16
 97	 21	141.0	22.7	 16
 98	 21	124.5	22.9	 16
 99	 21	56.3	9.3	 16
100	 21	149.8	21.0	 16
101	 21	219.5	30.5	 16
102	 21	86.3	10.1	 16
103	 21	58.3	10.6	 16
104	 21	116.3	14.2	 16
105	 21	116.3	18.8	 16
106	 21	114.0	20.9	 16
107	 21	547.3	96.0	 16
108	 21	69.5	8.9	 16
109	 21	220.0	36.5	 16
110	 21	149.3	23.2	 16
111	 21	73.3	13.4	 16
112	 21	2441.3	347.7	 16
113	 21	82.0	15.4	 16
114	 21	63.0	11.5	 16
115	 21	74.5	12.5	 16
116	 21	197.0	36.2	 16
117	 21	97.0	19.7	 16
118	 21	219.3	54.1	 16
119	 21	63.0	11.8	 16
120	 21	103.0	15.7	 20
121	 21	3339.3	511.9	 16
122	 21	1809.8	242.1	 16
123	 21	145.3	30.4	 16
124	 21	267.0	45.9	 16
125	 21	298.3	42.3	 16
126	 21	90.8	7.9	 16
127	 21	64.5	11.4	 16
128	 21	63.3	12.9	 16
129	 21	147.0	20.0	 16
130	 21	96.3	11.2	 16
131	 21	62.8	11.5	 16
132	 21	133.0	23.9	 16
133	 21	433.3	61.1	 16
134	 21	99.3	18.0	 16
135	 21	78.0	15.2	 16
136	 21	207.0	25.2	 16
137	 21	210.5	31.8	 16
138	 21	94.5	15.3	 16
139	 21	461.8	47.5	 16
140	 21	121.5	26.7	 16
141	 21	68.8	19.1	 16
142	 21	256.5	48.4	 16
143	 21	73.0	9.4	 16
144	 21	212.8	30.3	 16
145	 21	89.3	15.2	 16
146	 21	62.3	12.3	 16
147	 21	141.3	16.9	 16
148	 21	77.5	12.8	 16
149	 21	196.8	28.8	 16
150	 21	74.3	14.2	 16
151	 21	137.0	21.2	 16
152	 21	686.3	77.4	 16
153	 21	111.3	22.5	 16
154	 21	184.3	24.9	 16
155	 21	173.3	24.9	 16
156	 21	173.0	30.3	 16
157	 21	544.5	51.8	 16
158	 21	131.5	22.1	 16
159	 21	85.5	11.9	 16
160	 21	1158.5	111.3	 16
161	 21	103.5	20.8	 16
162	 21	972.0	117.5	 16
163	 21	88.3	12.2	 16
164	 21	267.8	44.9	 16
165	 21	52.3	8.2	 16
166	 21	59.0	7.6	 16
167	 21	191.8	37.0	 16
168	 21	82.8	14.0	 16
169	 21	193.8	33.1	 16
170	 21	88.3	13.4	 16
171	 21	220.3	20.4	 16
172	 21	404.0	48.2	 16
173	 21	153.0	24.1	 16
174	 21	89.3	15.5	 16
175	 21	234.5	30.0	 16
176	 21	115.5	24.0	 16
177	 21	68.3	12.9	 16
178	 21	92.8	20.0	 16
179	 21	425.0	31.1	 16
180	 21	220.5	26.6	 16
181	 21	60.0	10.7	 16
182	 21	216.0	39.4	 16
183	 21	57.8	11.7	 16
184	 21	75.3	18.0	 16
185	 21	52.5	10.8	 16
186	 21	51.3	8.6	 16
187	 21	67.0	16.4	 16
188	 21	58.3	11.2	 16
189	 21	1093.5	200.1	 16
190	 21	160.3	24.0	 16
191	 21	456.3	57.3	 16
192	 21	109.0	14.6	 16
193	 21	94.8	14.4	 16
194	 21	227.3	52.8	 16
195	 21	59.5	10.7	 16
196	 21	688.5	157.8	 16
197	 21	52.5	10.8	 16
198	 21	88.3	11.6	 16
199	 21	299.5	26.6	 16
200	 21	270.0	26.7	 16
201	 21	127.3	21.9	 16
202	 21	84.0	17.8	 16
203	 21	206.0	28.9	 16
204	 21	49.8	7.3	 16
205	 21	103.3	16.7	 16
206	 21	81.5	13.0	 16
207	 21	70.5	13.5	 16
208	 21	291.3	35.8	 16
209	 21	81.0	11.7	 16
210	 21	129.8	19.2	 16
211	 21	58.0	14.3	 16
212	 21	63.0	14.8	 16
213	 21	77.8	13.8	 16
214	 21	70.5	16.6	 16
215	 21	247.0	54.8	 16
216	 21	106.3	15.7	 16
217	 21	64.0	11.4	 16
218	 21	271.0	53.6	 16
219	 21	155.3	31.9	 16
220	 21	381.8	76.0	 16
221	 21	254.8	51.7	 16
222	 21	66.3	11.5	 16
223	 21	62.8	13.5	 16
224	 21	185.0	29.1	 16
225	 21	66.8	14.4	 16
226	 21	63.3	12.9	 16
227	 21	2180.5	331.2	 16
228	 21	73.0	8.8	 16
229	 21	506.3	75.2	 16
230	 21	778.5	109.3	 16
231	 21	714.8	111.5	 16
232	 21	922.5	115.7	 16
233	 21	71.8	11.0	 16
234	 21	129.3	21.7	 16
235	 21	186.3	16.7	 16
236	 21	61.5	10.9	 16
237	 21	68.0	10.7	 16
238	 21	66.0	12.3	 20
239	 21	103.3	18.6	 16
240	 21	68.8	11.0	 16
241	 21	113.8	21.5	 16
242	 21	54.8	8.7	 16
243	 21	1031.3	178.7	 16
244	 21	80.0	10.5	 16
245	 21	285.3	52.0	 16
246	 21	138.3	23.8	 16
247	 21	147.3	29.0	 16
248	 21	188.3	19.8	 16
249	 21	185.8	25.8	 16
250	 21	80.0	10.8	 16
251	 21	73.8	13.1	 16
252	 21	56.5	9.4	 16
253	 21	52.0	9.2	 16
254	 21	62.0	9.2	 16
255	 21	92.5	15.0	 16
256	 21	107.8	18.4	 16
257	 21	253.0	27.8	 16
258	 21	165.0	32.3	 16
259	 21	80.3	12.6	 16
260	 21	64.5	7.7	 16
261	 21	61.0	8.3	 16
262	 21	795.8	81.8	 16
263	 21	5397.5	873.0	 16
264	 21	59.5	13.0	 16
265	 21	77.8	13.1	 16
266	 21	165.5	53.6	 16
267	 21	112.3	15.8	 16
268	 21	87.8	12.3	 16
269	 21	356.5	38.8	 16
270	 21	559.0	92.4	 16
271	 21	67.3	11.8	 16
272	 21	72.0	12.2	 16
273	 21	60.3	9.6	 16
274	 21	140.5	26.9	 16
275	 21	574.0	125.1	 16
276	 21	292.8	55.3	 16
277	 21	58.3	13.2	 16
278	 21	199.3	24.5	 16
279	 21	430.8	46.4	 16
280	 21	107.3	17.4	 16
281	 21	144.3	23.5	 16
282	 21	64.0	8.8	 16
283	 21	375.0	39.8	 16
284	 21	56.0	10.6	 16
285	 21	50.0	8.7	 16
286	 21	108.3	27.7	 16
287	 21	213.8	33.1	 16
288	 21	853.5	71.2	 16
289	 21	104.5	57.0	 16
290	 21	80.5	13.6	 16
291	 21	133.5	15.6	 16
292	 21	80.0	21.1	 16
293	 21	367.3	38.7	 16
294	 21	389.0	47.8	 16
295	 21	83.5	16.9	 16
296	 21	196.3	27.7	 16
297	 21	56.3	10.2	 16
298	 21	59.3	7.8	 16
299	 21	94.5	17.4	 16
300	 21	98.5	18.0	 16
301	 21	116.5	25.5	 16
302	 21	274.3	32.9	 16
303	 21	630.8	60.2	 16
304	 21	500.5	53.2	 16
305	 21	2423.5	229.4	 16
306	 21	148.8	27.0	 16
307	 21	66.5	10.2	 16
308	 21	57.0	6.8	 16
309	 21	146.3	19.6	 16
310	 21	156.8	19.8	 16
311	 21	294.5	34.8	 16
312	 21	63.3	14.3	 16
313	 21	311.8	25.2	 16
314	 21	63.0	11.2	 16
315	 21	59.0	13.1	 16
316	 21	79.8	11.4	 16
317	 21	497.8	67.0	 16
318	 21	1439.5	160.9	 16
319	 21	59.8	10.4	 16
320	 21	130.5	15.0	 16
321	 21	1508.3	190.1	 16
322	 21	4063.3	622.5	 16
323	 21	776.0	117.9	 16
324	 21	67.0	12.1	 16
325	 21	79.3	15.2	 16
326	 21	356.3	73.0	 16
327	 21	160.3	24.3	 16
328	 21	64.5	15.0	 16
329	 21	275.0	41.7	 16
330	 21	58.5	13.0	 16
331	 21	108.3	13.3	 16
332	 21	477.5	71.4	 16
333	 21	217.5	35.9	 16
334	 21	179.8	25.7	 16
335	 21	237.5	26.5	 16
336	 21	56.3	10.3	 16
337	 21	124.5	13.9	 16
338	 21	154.8	20.4	 16
339	 21	72.3	13.1	 16
340	 21	212.5	32.0	 16
341	 21	1384.5	207.6	 16
342	 21	69.5	15.5	 16
343	 21	72.0	13.1	 16
344	 21	142.8	23.5	 16
345	 21	60.8	16.8	 16
346	 21	98.0	13.9	 16
347	 21	76.5	9.3	 16
348	 21	1635.0	480.7	 16
349	 21	1626.8	245.0	 16
350	 21	217.8	42.2	 16
351	 21	163.5	34.2	 16
352	 21	146.8	32.4	 16
353	 21	124.5	28.5	 16
354	 21	79.5	12.5	 16
355	 21	5064.8	1203.0	 16
356	 21	166.8	31.7	 16
357	 21	522.0	60.2	 20
358	 21	209.8	23.4	 16
359	 21	599.8	57.1	 16
360	 21	521.0	42.0	 16
361	 21	659.3	44.1	 16
362	 21	71.0	8.7	 16
363	 21	256.3	43.0	 16
364	 21	55.0	11.2	 16
365	 21	118.3	15.0	 16
366	 21	247.3	33.9	 16
367	 21	387.0	40.4	 16
368	 21	101.8	14.9	 16
369	 21	456.5	61.3	 16
370	 21	210.3	30.6	 16
371	 21	269.5	35.0	 16
372	 21	181.0	27.9	 16
373	 21	57.0	12.4	 16
374	 21	92.8	16.3	 16
375	 21	329.5	44.1	 16
376	 21	77.8	17.7	 16
377	 21	96.5	15.0	 16
378	 21	80.3	12.6	 16
379	 21	62.3	20.5	 16
380	 21	68.3	11.1	 16
381	 21	51.8	8.7	 16
382	 21	90.3	16.1	 16
383	 21	121.3	17.1	 16
384	 21	61.5	11.1	 16
385	 21	66.5	9.9	 16
386	 21	60.5	7.9	 16
387	 21	143.5	27.2	 16
388	 21	71.8	12.3	 16
389	 21	109.8	13.8	 16
390	 21	72.5	15.9	 16
391	 21	61.0	10.6	 16
392	 21	1260.0	110.3	 16
393	 21	1515.0	167.8	 16
394	 21	65.0	11.3	 16
395	 21	73.3	11.1	 16
396	 21	767.8	98.0	 16
397	 21	5377.0	566.6	 16
398	 21	166.3	24.6	 16
399	 21	113.0	16.3	 16
400	 21	329.5	50.9	 16
401	 21	106.8	20.6	 16
402	 21	53.5	8.2	 16
403	 21	180.8	31.9	 16
404	 21	122.5	18.6	 16
405	 21	62.0	11.5	 16
406	 21	465.3	75.0	 16
407	 21	283.3	38.1	 16
408	 21	95.3	16.3	 16
409	 21	56.3	8.5	 16
410	 21	72.5	14.1	 16
411	 21	62.3	12.8	 16
412	 21	1937.3	115.1	 16
413	 21	97.3	15.7	 16
414	 21	1121.0	92.9	 16
415	 21	215.8	23.0	 16
416	 21	123.3	16.2	 16
417	 21	87.0	11.4	 16
418	 21	147.5	17.9	 16
419	 21	142.0	17.4	 16
420	 21	59.0	12.7	 16
421	 21	129.8	19.4	 16
422	 21	124.5	21.0	 16
423	 21	110.3	13.0	 16
424	 21	903.8	81.5	 16
425	 21	245.0	23.4	 16
426	 21	135.0	17.9	 16
427	 21	104.8	21.3	 16
428	 21	143.8	26.0	 16
429	 21	105.3	16.8	 16
430	 21	286.8	34.2	 16
431	 21	94.3	11.0	 16
432	 21	151.3	26.2	 16
433	 21	221.8	26.0	 16
434	 21	208.5	27.4	 16
435	 21	211.3	28.9	 16
436	 21	81.5	13.5	 16
437	 21	92.3	18.7	 16
438	 21	856.8	84.2	 16
439	 21	83.3	14.5	 16
440	 21	82.0	19.7	 16
441	 21	128.5	17.5	 16
442	 21	77.3	17.0	 16
443	 21	68.5	6.6	 16
444	 21	94.0	12.6	 16
445	 21	48.8	7.6	 16
446	 21	177.5	29.0	 16
447	 21	87.3	16.9	 16
448	 21	192.8	23.8	 16
449	 21	3247.3	276.0	 16
450	 21	198.3	20.3	 16
451	 21	173.5	26.7	 16
452	 21	103.0	17.9	 16
453	 21	67.5	11.2	 16
454	 21	233.0	35.2	 16
455	 21	69.0	9.5	 16
456	 21	169.8	19.7	 16
457	 21	85.0	13.0	 16
458	 21	240.3	32.3	 16
459	 21	135.8	31.5	 16
460	 21	452.3	96.1	 16
461	 21	231.0	35.1	 16
462	 21	517.8	53.8	 16
463	 21	655.5	49.2	 16
464	 21	98.3	12.5	 16
465	 21	170.8	32.3	 16
466	 21	195.5	40.1	 16
467	 21	442.5	48.0	 16
468	 21	138.0	19.9	 16
469	 21	138.0	22.6	 16
470	 21	99.5	16.0	 16
471	 21	105.5	21.0	 16
472	 21	62.0	17.0	 16
473	 21	231.3	26.0	 16
474	 21	59.3	10.3	 16
475	 21	69.5	12.6	 16
476	 21	332.5	39.7	 20
477	 21	807.5	91.9	 16
478	 21	197.3	29.6	 16
479	 21	95.3	14.8	 16
480	 21	59.3	12.4	 16
481	 21	59.5	14.6	 16
482	 21	80.5	15.5	 16
483	 21	65.0	10.7	 16
484	 21	58.5	10.3	 16
485	 21	73.5	16.9	 16
486	 21	95.3	15.2	 16
487	 21	242.5	58.5	 16
488	 21	80.3	13.5	 16
489	 21	77.5	15.8	 16
490	 21	325.0	36.1	 16
491	 21	368.5	40.2	 16
492	 21	191.0	37.2	 16
493	 21	79.3	13.0	 16
494	 21	145.0	22.9	 16
495	 21	66.0	11.9	 16
496	 21	96.5	12.6	 16
497	 21	45.0	6.8	 16
498	 21	106.5	18.9	 16
499	 21	97.3	22.0	 16
500	 21	123.3	18.8	 16
501	 21	374.8	54.1	 16
502	 21	139.5	22.9	 16
503	 21	100.3	16.0	 16
504	 21	93.3	15.0	 16
505	 21	852.0	139.4	 16
506	 21	61.0	9.6	 16
507	 21	517.0	101.7	 16
508	 21	168.8	31.7	 16
509	 21	91.0	17.0	 16
510	 21	71.0	14.8	 16
511	 21	3599.5	563.3	 16
512	 21	81.0	16.4	 16
513	 21	53.8	9.3	 16
514	 21	54.5	12.2	 16
515	 21	447.8	27.9	 16
516	 21	293.5	34.9	 16
517	 21	103.0	17.0	 16
518	 21	182.3	31.5	 16
519	 21	57.0	7.9	 16
520	 21	149.5	21.6	 16
521	 21	307.5	28.9	 16
522	 21	328.8	34.0	 16
523	 21	141.3	10.8	 16
524	 21	52.5	9.8	 16
525	 21	79.8	11.7	 16
526	 21	56.5	12.4	 16
527	 21	201.3	18.4	 16
528	 21	188.3	21.6	 16
529	 21	364.5	27.9	 16
530	 21	212.3	29.3	 16
531	 21	72.8	10.7	 16
532	 21	959.5	121.1	 16
533	 21	56.8	11.8	 16
534	 21	81.3	15.3	 16
535	 21	248.8	38.0	 16
536	 21	73.0	17.5	 16
537	 21	158.3	29.4	 16
538	 21	63.0	8.9	 16
539	 21	78.0	15.8	 16
540	 21	61.0	8.8	 16
541	 21	129.5	18.5	 16
542	 21	60.3	11.2	 16
543	 21	612.0	42.3	 16
544	 21	110.0	14.4	 16
545	 21	762.8	64.3	 16
546	 21	946.3	49.2	 16
547	 21	95.8	15.2	 16
548	 21	182.3	22.0	 16
549	 21	86.0	20.8	 16
550	 21	128.3	14.5	 16
551	 21	75.8	17.5	 16
552	 21	181.3	25.8	 16
553	 21	103.3	16.0	 16
554	 21	58.8	11.3	 16
555	 21	52.5	10.7	 16
556	 21	55.5	13.3	 16
557	 21	73.5	14.6	 16
558	 21	58.5	9.3	 16
559	 21	57.0	11.5	 16
560	 21	88.8	16.8	 16
561	 21	100.3	23.4	 16
562	 21	172.0	29.1	 16
563	 21	251.0	31.9	 16
564	 21	286.5	36.9	 16
565	 21	68.3	9.0	 16
566	 21	259.3	63.6	 16
567	 21	54.0	6.0	 16
568	 21	454.3	66.4	 16
569	 21	136.0	22.2	 16
570	 21	58.3	12.7	 16
571	 21	90.3	14.8	 16
572	 21	93.5	16.5	 16
573	 21	84.5	17.5	 16
574	 21	304.0	55.1	 16
575	 21	143.0	23.9	 16
576	 21	265.5	43.3	 16
577	 21	146.0	18.4	 16
578	 21	167.3	22.7	 16
579	 21	196.8	38.0	 16
580	 21	218.5	28.8	 16
581	 21	65.8	10.7	 16
582	 21	57.3	10.9	 16
583	 21	4772.5	1190.9	 16
584	 21	124.5	37.7	 16
585	 21	921.0	246.8	 16
586	 21	260.0	65.2	 16
587	 21	75.5	13.1	 16
588	 21	96.5	18.6	 16
589	 21	107.3	19.9	 16
590	 21	124.5	24.1	 16
591	 21	506.8	117.3	 16
592	 21	392.5	74.8	 16
593	 21	124.3	20.5	 16
594	 21	92.3	17.9	 20
595	 21	91.8	21.4	 16
596	 21	108.3	16.5	 16
597	 21	65.0	11.4	 16
598	 21	109.3	23.6	 16
599	 21	262.3	32.9	 16
600	 21	71.8	10.2	 16
601	 21	70.8	11.7	 16
602	 21	914.5	63.6	 16
603	 21	122.3	22.7	 16
604	 21	88.8	13.4	 16
605	 21	102.5	13.8	 16
606	 21	117.3	21.2	 16
607	 21	112.5	16.5	 16
608	 21	123.8	12.2	 16
609	 21	731.0	86.7	 16
610	 21	106.3	17.8	 16
611	 21	67.5	10.8	 16
612	 21	149.3	15.6	 16
613	 21	267.0	33.5	 16
614	 21	126.5	25.6	 16
615	 21	125.3	20.6	 16
616	 21	281.0	27.8	 16
617	 21	182.5	28.4	 16
618	 21	66.8	9.6	 16
619	 21	363.0	55.7	 16
620	 21	100.5	19.8	 16
621	 21	128.3	18.3	 16
622	 21	65.5	12.8	 16
623	 21	129.3	19.8	 16
624	 21	80.5	11.8	 16
625	 21	77.8	14.8	 16
626	 21	221.0	34.5	 16
627	 21	71.3	11.8	 16
628	 21	74.5	15.1	 16
629	 21	66.0	17.8	 16
630	 21	114.5	16.9	 16
631	 21	94.3	9.8	 16
632	 21	701.8	64.2	 16
633	 21	90.8	15.5	 16
634	 21	67.0	12.1	 16
635	 21	1481.3	140.3	 16
636	 21	106.3	14.9	 16
637	 21	70.8	15.3	 16
638	 21	1436.8	220.3	 16
639	 21	60.5	10.5	 16
640	 21	61.0	9.4	 16
641	 21	321.0	52.5	 16
642	 21	92.3	15.7	 16
643	 21	70.8	12.5	 16
644	 21	64.3	14.1	 16
645	 21	73.8	13.5	 16
646	 21	87.3	21.2	 16
647	 21	85.8	14.5	 16
648	 21	188.5	21.6	 16
649	 21	234.0	30.6	 16
650	 21	119.5	16.8	 16
651	 21	186.3	35.3	 16
652	 21	191.0	25.0	 16
653	 21	231.8	24.4	 16
654	 21	78.3	14.2	 16
655	 21	210.3	26.1	 16
656	 21	3821.8	524.1	 16
657	 21	7967.5	826.4	 16
658	 21	134.5	15.0	 16
659	 21	79.8	12.0	 16
660	 21	420.3	60.2	 16
661	 21	96.5	18.6	 16
662	 21	1265.3	198.0	 16
663	 21	77.3	12.3	 16
664	 21	709.5	83.2	 16
665	 21	56.0	9.5	 16
666	 21	71.5	14.7	 16
667	 21	57.5	10.4	 16
668	 21	105.0	18.6	 16
669	 21	54.3	10.4	 16
670	 21	57.3	12.3	 16
671	 21	360.5	72.1	 16
672	 21	97.3	11.3	 16
673	 21	288.5	43.9	 16
674	 21	463.3	54.1	 16
675	 21	325.8	32.7	 16
676	 21	385.3	22.4	 16
677	 21	108.8	17.7	 16
678	 21	80.3	14.6	 16
679	 21	265.5	49.9	 16
680	 21	67.8	8.4	 16
681	 21	70.3	11.3	 16
682	 21	394.0	52.4	 16
683	 21	54.5	10.5	 16
684	 21	59.5	11.4	 16
685	 21	54.5	9.9	 16
686	 21	71.5	15.1	 16
687	 21	218.5	31.5	 16
688	 21	168.8	29.4	 16
689	 21	1471.0	228.1	 16
690	 21	1019.3	157.8	 16
691	 21	165.0	27.9	 16
692	 21	60.3	9.7	 16
693	 21	345.0	66.6	 16
694	 21	280.3	29.1	 16
695	 21	94.0	12.2	 16
696	 21	127.0	18.2	 16
697	 21	143.5	25.2	 16
698	 21	391.3	87.1	 16
699	 21	68.3	13.1	 16
700	 21	1153.5	203.6	 16
701	 21	118.3	16.5	 16
702	 21	71.0	12.4	 16
703	 21	86.3	12.4	 16
704	 21	118.5	16.5	 16
705	 21	112.8	17.1	 16
706	 21	364.0	38.9	 16
707	 21	186.8	27.4	 16
708	 21	107.8	18.5	 16
709	 21	177.3	15.0	 16
710	 21	337.3	44.5	 16
711	 21	104.0	13.1	 16
  0	 22	7911.8	1750.0	 16
  1	 22	340.3	50.4	 16
  2	 22	78.3	10.0	 16
  3	 22	66.0	12.0	 16
  4	 22	108.5	13.6	 20
  5	 22	67.3	12.0	 16
  6	 22	54.3	6.1	 16
  7	 22	120.0	12.0	 16
  8	 22	199.0	28.4	 16
  9	 22	95.3	18.4	 16
 10	 22	236.0	31.7	 16
 11	 22	110.0	18.3	 16
 12	 22	97.5	20.5	 16
 13	 22	61.5	10.5	 16
 14	 22	126.5	18.4	 16
 15	 22	248.5	42.9	 16
 16	 22	70.0	14.9	 16
 17	 22	158.8	19.0	 16
 18	 22	103.5	18.8	 16
 19	 22	105.3	13.0	 16
 20	 22	67.5	11.9	 16
 21	 22	85.5	12.8	 16
 22	 22	133.0	20.1	 16
 23	 22	86.8	24.7	 16
 24	 22	68.8	11.3	 16
 25	 22	115.5	21.0	 16
 26	 22	63.3	14.6	 16
 27	 22	72.3	20.3	 16
 28	 22	57.3	10.9	 16
 29	 22	51.3	6.9	 16
 30	 22	217.5	25.1	 16
 31	 22	195.0	28.6	 16
 32	 22	59.5	20.3	 16
 33	 22	132.5	19.7	 16
 34	 22	112.8	18.6	 16
 35	 22	62.5	14.8	 16
 36	 22	59.5	12.5	 16
 37	 22	59.0	10.7	 16
 38	 22	117.0	24.1	 16
 39	 22	238.0	36.0	 16
 40	 22	147.3	29.5	 16
 41	 22	156.3	21.6	 16
 42	 22	62.5	8.8	 16
 43	 22	69.0	12.2	 16
 44	 22	62.5	9.1	 16
 45	 22	65.5	8.3	 16
 46	 22	81.0	12.3	 16
 47	 22	62.5	12.0	 16
 48	 22	80.5	12.4	 16
 49	 22	76.3	13.4	 16
 50	 22	60.0	12.5	 16
 51	 22	151.3	26.3	 16
 52	 22	145.0	22.0	 16
 53	 22	58.3	11.7	 16
 54	 22	66.3	9.9	 16
 55	 22	65.3	11.1	 16
 56	 22	122.3	15.7	 16
 57	 22	330.3	45.7	 16
 58	 22	140.5	30.4	 16
 59	 22	152.3	24.9	 16
 60	 22	66.3	13.1	 16
 61	 22	70.0	12.1	 16
 62	 22	69.3	10.6	 16
 63	 22	186.5	30.4	 16
 64	 22	78.3	15.2	 16
 65	 22	70.5	15.1	 16
 66	 22	117.0	22.5	 16
 67	 22	61.0	9.0	 16
 68	 22	272.5	36.8	 16
 69	 22	400.3	71.4	 16
 70	 22	1312.3	158.5	 16
 71	 22	62.3	13.5	 16
 72	 22	72.8	13.7	 16
 73	 22	928.3	108.2	 16
 74	 22	199.8	28.4	 16
 75	 22	104.8	16.5	 16
 76	 22	63.3	10.3	 16
 77	 22	79.3	14.3	 16
 78	 22	156.5	29.4	 16
 79	 22	66.8	13.0	 16
 80	 22	84.0	15.9	 16
 81	 22	181.3	23.2	 16
 82	 22	143.0	18.1	 16
 83	 22	192.0	25.7	 16
 84	 22	341.0	45.9	 16
 85	 22	106.3	15.6	 16
 86	 22	96.5	18.8	 16
 87	 22	144.5	17.4	 16
 88	 22	63.8	10.3	 16
 89	 22	128.0	20.1	 16
 90	 22	73.8	14.0	 16
 91	 22	197.5	23.0	 16
 92	 22	322.8	37.5	 16
 93	 22	94.0	13.1	 16
 94	 22	390.0	44.5	 16
 95	 22	435.0	45.6	 16
 96	 22	94.0	12.9	 16
 97	 22	201.8	87.1	 16
 98	 22	74.3	13.7	 16
 99	 22	56.3	11.1	 16
100	 22	60.3	10.5	 16
101	 22	55.8	11.0	 16
102	 22	59.0	11.6	 16
103	 22	67.0	11.3	 16
104	 22	87.3	12.3	 16
105	 22	213.3	28.1	 16
106	 22	271.5	30.6	 16
107	 22	67.0	13.1	 16
108	 22	60.0	10.3	 16
109	 22	180.5	30.0	 16
110	 22	64.8	14.4	 16
111	 22	70.3	10.5	 16
112	 22	274.3	56.5	 16
113	 22	60.0	8.0	 16
114	 22	65.5	12.7	 16
115	 22	62.0	10.6	 16
116	 22	64.0	14.8	 16
117	 22	62.5	10.4	 16
118	 22	64.8	15.0	 16
119	 22	59.3	8.8	 16
120	 22	165.8	21.9	 16
121	 22	415.0	64.5	 16
122	 22	108.5	16.0	 16
123	 22	82.5	16.0	 20
124	 22	72.3	15.7	 16
125	 22	79.5	11.2	 16
126	 22	145.8	26.9	 16
127	 22	67.3	18.4	 16
128	 22	60.5	17.2	 16
129	 22	317.0	33.7	 16
130	 22	79.5	13.1	 16
131	 22	66.5	12.2	 16
132	 22	82.0	13.0	 16
133	 22	197.8	29.8	 16
134	 22	64.8	13.2	 16
135	 22	73.8	11.8	 16
136	 22	112.8	11.3	 16
137	 22	153.0	27.0	 16
138	 22	82.5	16.4	 16
139	 22	101.0	19.2	 16
140	 22	83.5	15.7	 16
141	 22	56.8	9.9	 16
142	 22	65.8	8.0	 16
143	 22	80.5	13.9	 16
144	 22	153.8	31.6	 16
145	 22	93.3	16.5	 16
146	 22	55.5	9.5	 16
147	 22	71.0	17.4	 16
148	 22	65.0	14.2	 16
149	 22	74.8	12.9	 16
150	 22	86.3	15.8	 16
151	 22	90.8	17.7	 16
152	 22	545.3	43.3	 16
153	 22	96.0	14.5	 16
154	 22	65.0	10.0	 16
155	 22	79.3	17.4	 16
156	 22	109.8	20.0	 16
157	 22	102.5	16.2	 16
158	 22	82.0	12.3	 16
159	 22	67.3	10.3	 16
160	 22	399.5	52.6	 16
161	 22	63.3	9.4	 16
162	 22	238.0	27.1	 16
163	 22	61.5	8.4	 16
164	 22	46.0	7.2	 16
165	 22	50.0	10.2	 16
166	 22	49.8	8.5	 16
167	 22	148.8	18.9	 16
168	 22	83.5	15.5	 16
169	 22	56.5	9.1	 16
170	 22	72.3	15.3	 16
171	 22	129.8	17.0	 16
172	 22	141.5	20.0	 16
173	 22	157.0	20.5	 16
174	 22	107.5	17.1	 16
175	 22	60.8	7.7	 16
176	 22	140.8	21.6	 16
177	 22	68.5	15.1	 16
178	 22	77.8	11.2	 16
179	 22	87.0	13.2	 16
180	 22	115.8	16.3	 16
181	 22	59.8	9.8	 16
182	 22	82.3	10.8	 16
183	 22	58.8	13.0	 16
184	 22	57.0	7.4	 16
185	 22	59.5	11.3	 16
186	 22	58.3	13.3	 16
187	 22	62.3	11.7	 16
188	 22	54.8	10.2	 16
189	 22	238.8	30.9	 16
190	 22	53.5	8.9	 16
191	 22	95.0	15.7	 16
192	 22	70.3	11.2	 16
193	 22	95.0	17.3	 16
194	 22	80.0	19.1	 16
195	 22	57.3	11.4	 16
196	 22	187.5	30.0	 16
197	 22	55.5	11.3	 16
198	 22	58.3	9.4	 16
199	 22	257.5	20.0	 16
200	 22	74.0	13.9	 16
201	 22	67.0	12.9	 16
202	 22	46.5	10.1	 16
203	 22	48.5	7.4	 16
204	 22	50.8	8.4	 16
205	 22	62.3	13.9	 16
206	 22	69.8	13.0	 16
207	 22	64.5	14.3	 16
208	 22	122.0	24.4	 16
209	 22	94.3	14.2	 16
210	 22	259.3	33.1	 16
211	 22	58.8	9.8	 16
212	 22	58.8	11.0	 16
213	 22	51.3	10.8	 16
214	 22	53.3	10.6	 16
215	 22	73.3	10.5	 16
216	 22	216.5	32.7	 16
217	 22	54.0	11.6	 16
218	 22	59.3	11.5	 16
219	 22	104.5	17.8	 16
220	 22	137.3	24.7	 16
221	 22	116.8	22.1	 16
222	 22	60.0	10.1	 16
223	 22	53.3	10.0	 16
224	 22	59.8	14.0	 16
225	 22	61.8	16.0	 16
226	 22	58.0	11.0	 16
227	 22	410.0	61.1	 16
228	 22	85.5	11.4	 16
229	 22	279.3	53.4	 16
230	 22	149.3	28.2	 16
231	 22	59.3	14.0	 16
232	 22	74.0	17.6	 16
233	 22	86.0	14.6	 16
234	 22	197.5	30.4	 16
235	 22	147.5	21.2	 16
236	 22	54.0	9.8	 16
237	 22	55.3	11.5	 16
238	 22	49.0	9.6	 16
239	 22	60.5	11.8	 16
240	 22	66.8	14.4	 16
241	 22	96.8	22.9	 20
242	 22	71.5	10.9	 16
243	 22	383.8	52.6	 16
244	 22	93.0	13.1	 16
245	 22	164.0	21.4	 16
246	 22	118.0	19.9	 16
247	 22	79.3	12.6	 16
248	 22	307.8	44.8	 16
249	 22	119.3	26.2	 16
250	 22	61.5	11.8	 16
251	 22	53.5	10.3	 16
252	 22	69.3	12.7	 16
253	 22	54.8	10.7	 16
254	 22	53.5	10.5	 16
255	 22	64.3	10.1	 16
256	 22	91.0	14.8	 16
257	 22	79.8	13.3	 16
258	 22	98.3	15.8	 16
259	 22	61.5	11.5	 16
260	 22	56.5	10.3	 16
261	 22	77.3	13.8	 16
262	 22	328.3	47.4	 16
263	 22	1167.0	207.7	 16
264	 22	56.8	8.8	 16
265	 22	82.0	40.8	 16
266	 22	123.0	22.2	 16
267	 22	161.8	25.1	 16
268	 22	120.0	10.5	 16
269	 22	168.8	25.1	 16
270	 22	109.0	14.5	 16
271	 22	62.3	8.4	 16
272	 22	57.0	13.2	 16
273	 22	59.3	8.5	 16
274	 22	104.3	17.6	 16
275	 22	116.3	21.3	 16
276	 22	107.0	14.9	 16
277	 22	60.3	11.0	 16
278	 22	73.5	11.1	 16
279	 22	76.5	15.9	 16
280	 22	65.0	13.3	 16
281	 22	65.5	12.7	 16
282	 22	61.0	10.1	 16
283	 22	57.0	7.5	 16
284	 22	56.0	12.0	 16
285	 22	58.5	8.8	 16
286	 22	60.0	9.0	 16
287	 22	83.3	8.6	 16
288	 22	284.5	44.0	 16
289	 22	83.0	11.4	 16
290	 22	101.3	11.7	 16
291	 22	91.8	16.2	 16
292	 22	114.5	17.5	 16
293	 22	186.5	38.8	 16
294	 22	129.8	13.9	 16
295	 22	66.3	12.6	 16
296	 22	117.0	19.2	 16
297	 22	59.0	11.4	 16
298	 22	56.0	8.7	 16
299	 22	74.8	17.0	 16
300	 22	60.8	10.1	 16
301	 22	88.0	12.6	 16
302	 22	725.8	52.6	 16
303	 22	229.5	33.2	 16
304	 22	294.3	24.4	 16
305	 22	447.5	57.0	 16
306	 22	89.3	18.3	 16
307	 22	74.5	13.7	 16
308	 22	51.3	7.3	 16
309	 22	95.0	12.8	 16
310	 22	113.5	16.5	 16
311	 22	97.5	19.4	 16
312	 22	62.5	14.8	 16
313	 22	136.3	15.9	 16
314	 22	54.5	11.2	 16
315	 22	51.5	7.4	 16
316	 22	67.3	14.6	 16
317	 22	1568.3	125.3	 16
318	 22	408.8	46.0	 16
319	 22	73.0	11.6	 16
320	 22	96.0	16.9	 16
321	 22	129.5	18.4	 16
322	 22	474.5	65.9	 16
323	 22	124.5	19.3	 16
324	 22	57.0	10.2	 16
325	 22	71.3	13.1	 16
326	 22	63.3	13.1	 16
327	 22	60.3	9.6	 16
328	 22	62.3	9.8	 16
329	 22	60.0	9.0	 16
330	 22	54.5	13.2	 16
331	 22	77.0	12.7	 16
332	 22	154.0	17.4	 16
333	 22	86.3	12.1	 16
334	 22	72.5	9.4	 16
335	 22	742.5	51.5	 16
336	 22	51.3	10.5	 16
337	 22	100.0	13.7	 16
338	 22	352.8	26.1	 16
339	 22	54.5	11.0	 16
340	 22	247.8	29.8	 16
341	 22	220.5	28.7	 16
342	 22	115.0	13.1	 16
343	 22	78.5	8.0	 16
344	 22	61.0	10.3	 16
345	 22	59.5	13.8	 16
346	 22	73.8	16.1	 16
347	 22	74.5	15.3	 16
348	 22	322.8	37.5	 16
349	 22	399.0	46.0	 16
350	 22	85.3	14.1	 16
351	 22	77.5	9.0	 16
352	 22	78.3	17.0	 16
353	 22	73.8	11.6	 16
354	 22	85.3	15.0	 16
355	 22	1075.8	181.6	 16
356	 22	110.3	16.8	 16
357	 22	780.8	131.6	 16
358	 22	225.3	31.1	 16
359	 22	258.0	32.6	 16
360	 22	305.5	36.0	 20
361	 22	145.3	16.7	 16
362	 22	72.0	13.0	 16
363	 22	74.8	13.5	 16
364	 22	64.0	9.9	 16
365	 22	85.0	14.3	 16
366	 22	80.0	18.8	 16
367	 22	101.3	17.0	 16
368	 22	123.5	16.7	 16
369	 22	85.3	11.9	 16
370	 22	126.3	15.0	 16
371	 22	117.5	16.6	 16
372	 22	91.5	15.9	 16
373	 22	58.0	11.4	 16
374	 22	74.5	18.1	 16
375	 22	72.0	15.3	 16
376	 22	77.8	15.3	 16
377	 22	133.3	28.2	 16
378	 22	99.3	18.7	 16
379	 22	60.3	12.5	 16
380	 22	78.0	11.5	 16
381	 22	56.8	11.0	 16
382	 22	53.0	10.2	 16
383	 22	61.0	6.9	 16
384	 22	62.3	12.7	 16
385	 22	58.5	8.8	 16
386	 22	59.8	13.3	 16
387	 22	53.5	11.4	 16
388	 22	79.3	12.6	 16
389	 22	78.3	13.5	 16
390	 22	58.3	7.6	 16
391	 22	53.0	10.8	 16
392	 22	120.8	15.6	 16
393	 22	104.0	15.0	 16
394	 22	59.3	13.0	 16
395	 22	99.3	11.6	 16
396	 22	126.0	16.3	 16
397	 22	201.3	50.8	 16
398	 22	78.3	9.4	 16
399	 22	80.0	13.8	 16
400	 22	96.8	16.5	 16
401	 22	69.3	10.1	 16
402	 22	52.3	7.7	 16
403	 22	77.0	14.5	 16
404	 22	132.3	14.9	 16
405	 22	65.3	10.0	 16
406	 22	168.3	23.5	 16
407	 22	186.5	31.7	 16
408	 22	78.0	14.1	 16
409	 22	61.0	12.3	 16
410	 22	56.0	6.4	 16
411	 22	54.8	8.7	 16
412	 22	442.0	73.2	 16
413	 22	61.5	12.7	 16
414	 22	116.0	21.3	 16
415	 22	65.5	11.7	 16
416	 22	66.3	11.2	 16
417	 22	110.0	14.4	 16
418	 22	113.0	17.4	 16
419	 22	110.0	16.6	 16
420	 22	66.5	10.4	 16
421	 22	216.8	26.2	 16
422	 22	70.0	12.4	 16
423	 22	94.0	13.8	 16
424	 22	410.3	35.9	 16
425	 22	107.0	18.7	 16
426	 22	140.8	20.0	 16
427	 22	96.8	16.7	 16
428	 22	507.8	28.4	 16
429	 22	185.5	24.3	 16
430	 22	180.3	21.0	 16
431	 22	71.5	13.1	 16
432	 22	115.0	23.9	 16
433	 22	347.3	34.9	 16
434	 22	314.3	27.8	 16
435	 22	351.8	31.9	 16
436	 22	69.3	12.8	 16
437	 22	75.0	15.0	 16
438	 22	81.8	14.7	 16
439	 22	59.0	21.0	 16
440	 22	71.3	18.1	 16
441	 22	155.0	18.6	 16
442	 22	77.5	11.9	 16
443	 22	61.5	15.9	 16
444	 22	70.8	16.1	 16
445	 22	48.3	12.9	 16
446	 22	65.0	11.7	 16
447	 22	89.3	19.5	 16
448	 22	195.3	26.5	 16
449	 22	691.0	65.2	 16
450	 22	118.0	15.9	 16
451	 22	170.5	22.9	 16
452	 22	67.3	9.4	 16
453	 22	75.3	15.2	 16
454	 22	89.0	14.2	 16
455	 22	77.5	12.5	 16
456	 22	121.5	14.3	 16
457	 22	109.0	15.5	 16
458	 22	162.5	22.6	 16
459	 22	120.8	17.9	 16
460	 22	150.5	24.0	 16
461	 22	486.5	35.6	 16
462	 22	288.5	32.6	 16
463	 22	176.5	24.0	 16
464	 22	89.0	12.2	 16
465	 22	62.3	12.3	 16
466	 22	75.0	13.3	 16
467	 22	65.3	11.4	 16
468	 22	135.3	15.7	 16
469	 22	85.8	14.4	 16
470	 22	121.8	19.6	 16
471	 22	60.3	10.5	 16
472	 22	84.8	14.0	 16
473	 22	58.5	11.1	 16
474	 22	53.3	9.2	 16
475	 22	60.5	12.1	 16
476	 22	142.8	20.8	 16
477	 22	336.0	32.3	 16
478	 22	80.3	11.4	 16
479	 22	124.0	22.8	 20
480	 22	71.5	13.8	 16
481	 22	49.5	7.7	 16
482	 22	68.0	14.2	 16
483	 22	58.3	8.0	 16
484	 22	60.3	14.2	 16
485	 22	48.0	7.2	 16
486	 22	153.8	23.3	 16
487	 22	243.8	31.2	 16
488	 22	75.3	13.7	 16
489	 22	59.3	9.8	 16
490	 22	171.8	25.9	 16
491	 22	199.3	24.4	 16
492	 22	117.3	19.1	 16
493	 22	71.3	13.7	 16
494	 22	184.8	23.9	 16
495	 22	59.0	9.0	 16
496	 22	140.8	26.1	 16
497	 22	60.0	10.6	 16
498	 22	65.5	14.0	 16
499	 22	76.8	12.5	 16
500	 22	106.3	18.4	 16
501	 22	86.3	16.7	 16
502	 22	122.0	13.3	 16
503	 22	80.3	7.4	 16
504	 22	101.0	17.0	 16
505	 22	314.0	37.2	 16
506	 22	80.3	13.4	 16
507	 22	138.3	17.6	 16
508	 22	73.0	17.2	 16
509	 22	68.3	7.6	 16
510	 22	65.5	9.3	 16
511	 22	414.0	46.6	 16
512	 22	77.5	15.5	 16
513	 22	65.5	14.6	 16
514	 22	57.0	10.0	 16
515	 22	127.5	27.9	 16
516	 22	84.3	12.5	 16
517	 22	66.3	8.4	 16
518	 22	77.8	13.7	 16
519	 22	56.5	7.9	 16
520	 22	61.3	10.2	 16
521	 22	62.5	8.3	 16
522	 22	65.5	10.2	 16
523	 22	97.3	14.1	 16
524	 22	64.8	11.6	 16
525	 22	54.8	10.1	 16
526	 22	50.3	10.3	 16
527	 22	144.3	18.3	 16
528	 22	81.3	12.6	 16
529	 22	218.0	29.3	 16
530	 22	133.5	20.2	 16
531	 22	71.3	9.2	 16
532	 22	170.0	27.3	 16
533	 22	53.0	11.5	 16
534	 22	54.5	7.3	 16
535	 22	106.0	13.7	 16
536	 22	60.0	13.3	 16
537	 22	125.5	12.5	 16
538	 22	65.5	12.1	 16
539	 22	53.3	7.7	 16
540	 22	56.0	11.3	 16
541	 22	56.3	8.9	 16
542	 22	59.3	8.3	 16
543	 22	327.3	39.1	 16
544	 22	166.3	25.0	 16
545	 22	372.5	36.5	 16
546	 22	390.3	33.1	 16
547	 22	53.3	8.8	 16
548	 22	111.5	16.4	 16
549	 22	93.5	12.5	 16
550	 22	105.0	14.9	 16
551	 22	52.8	8.1	 16
552	 22	233.5	29.6	 16
553	 22	70.0	11.6	 16
554	 22	51.0	9.2	 16
555	 22	64.3	11.4	 16
556	 22	53.3	14.5	 16
557	 22	49.8	9.2	 16
558	 22	57.0	10.8	 16
559	 22	76.8	14.2	 16
560	 22	67.0	12.7	 16
561	 22	56.8	9.4	 16
562	 22	138.0	16.2	 16
563	 22	151.3	29.4	 16
564	 22	134.8	24.6	 16
565	 22	61.0	13.0	 16
566	 22	57.3	7.3	 16
567	 22	63.8	11.1	 16
568	 22	85.8	16.0	 16
569	 22	68.5	15.8	 16
570	 22	63.5	12.7	 16
571	 22	61.5	14.4	 16
572	 22	59.5	12.9	 16
573	 22	85.3	13.9	 16
574	 22	83.8	17.2	 16
575	 22	115.5	17.0	 16
576	 22	266.8	33.3	 16
577	 22	116.8	18.8	 16
578	 22	86.0	12.9	 16
579	 22	131.8	23.4	 16
580	 22	138.3	22.6	 16
581	 22	64.3	12.5	 16
582	 22	70.3	16.6	 16
583	 22	747.3	160.4	 16
584	 22	78.3	8.6	 16
585	 22	324.3	68.8	 16
586	 22	115.0	18.0	 16
587	 22	80.5	15.0	 16
588	 22	62.8	11.9	 16
589	 22	98.3	9.5	 16
590	 22	112.0	13.9	 16
591	 22	159.3	33.0	 16
592	 22	576.0	110.3	 16
593	 22	97.3	15.2	 16
594	 22	80.0	12.7	 16
595	 22	78.5	10.4	 16
596	 22	72.0	13.1	 16
597	 22	58.0	10.1	 20
598	 22	72.3	9.9	 16
599	 22	126.3	18.0	 16
600	 22	96.3	16.2	 16
601	 22	69.3	9.6	 16
602	 22	162.0	20.5	 16
603	 22	74.3	14.9	 16
604	 22	58.5	8.8	 16
605	 22	137.8	24.6	 16
606	 22	85.3	13.7	 16
607	 22	278.3	24.0	 16
608	 22	69.0	10.1	 16
609	 22	138.0	11.4	 16
610	 22	86.0	14.2	 16
611	 22	63.3	11.8	 16
612	 22	113.0	23.4	 16
613	 22	146.8	28.6	 16
614	 22	148.0	20.6	 16
615	 22	231.3	32.5	 16
616	 22	408.0	51.3	 16
617	 22	103.3	18.5	 16
618	 22	78.3	13.6	 16
619	 22	111.8	18.2	 16
620	 22	63.0	17.2	 16
621	 22	79.8	12.2	 16
622	 22	68.5	11.5	 16
623	 22	82.8	16.6	 16
624	 22	71.5	15.1	 16
625	 22	61.8	7.7	 16
626	 22	87.5	17.4	 16
627	 22	58.8	12.7	 16
628	 22	63.3	12.8	 16
629	 22	73.8	10.9	 16
630	 22	158.8	34.2	 16
631	 22	272.3	38.7	 16
632	 22	289.8	25.2	 16
633	 22	105.3	21.1	 16
634	 22	58.0	9.5	 16
635	 22	151.8	25.2	 16
636	 22	97.0	14.4	 16
637	 22	78.0	17.5	 16
638	 22	302.8	57.9	 16
639	 22	61.0	13.3	 16
640	 22	64.0	10.5	 16
641	 22	180.3	23.3	 16
642	 22	84.3	16.0	 16
643	 22	58.3	12.8	 16
644	 22	62.3	9.7	 16
645	 22	64.3	10.4	 16
646	 22	60.3	7.0	 16
647	 22	89.0	14.7	 16
648	 22	114.3	17.5	 16
649	 22	124.5	20.2	 16
650	 22	135.0	13.8	 16
651	 22	105.8	16.9	 16
652	 22	140.3	21.6	 16
653	 22	130.3	19.6	 16
654	 22	70.3	12.0	 16
655	 22	124.5	22.4	 16
656	 22	859.8	119.7	 16
657	 22	1044.8	82.7	 16
658	 22	81.5	14.3	 16
659	 22	66.5	9.5	 16
660	 22	122.0	24.6	 16
661	 22	83.3	12.4	 16
662	 22	353.3	38.0	 16
663	 22	63.0	10.6	 16
664	 22	340.8	39.2	 16
665	 22	53.8	11.1	 16
666	 22	60.5	10.0	 16
667	 22	64.0	28.2	 16
668	 22	53.8	10.3	 16
669	 22	54.3	6.6	 16
670	 22	58.3	9.8	 16
671	 22	150.8	17.6	 16
672	 22	91.3	15.8	 16
673	 22	99.3	17.6	 16
674	 22	163.8	22.6	 16
675	 22	88.3	10.8	 16
676	 22	99.3	15.3	 16
677	 22	77.0	13.4	 16
678	 22	68.0	13.8	 16
679	 22	55.5	9.2	 16
680	 22	58.3	9.4	 16
681	 22	84.5	17.0	 16
682	 22	192.3	24.9	 16
683	 22	58.8	13.1	 16
684	 22	53.5	9.0	 16
685	 22	56.0	13.8	 16
686	 22	73.5	13.4	 16
687	 22	152.5	20.9	 16
688	 22	81.3	13.9	 16
689	 22	388.0	56.5	 16
690	 22	489.3	40.1	 16
691	 22	124.0	16.6	 16
692	 22	61.8	10.3	 16
693	 22	163.5	23.8	 16
694	 22	243.8	48.5	 16
695	 22	88.5	16.3	 16
696	 22	119.0	21.0	 16
697	 22	119.0	22.8	 16
698	 22	86.0	15.4	 16
699	 22	58.0	10.1	 16
700	 22	301.5	60.7	 16
701	 22	122.3	14.9	 16
702	 22	74.5	13.8	 16
703	 22	81.3	16.4	 16
704	 22	84.3	11.6	 16
705	 22	406.0	43.1	 16
706	 22	116.0	20.5	 16
707	 22	106.5	22.4	 16
708	 22	262.3	34.0	 16
709	 22	333.5	30.3	 16
710	 22	184.8	29.6	 16
711	 22	5963.5	1078.1	 16
  0	 23	102.0	23.2	 16
  1	 23	234.3	35.3	 16
  2	 23	93.3	13.8	 16
  3	 23	231.5	47.6	 16
  4	 23	2138.3	478.8	 16
  5	 23	78.5	22.4	 16
  6	 23	177.0	30.3	 16
  7	 23	131.3	17.0	 20
  8	 23	101.0	19.4	 16
  9	 23	70.5	8.5	 16
 10	 23	83.3	13.1	 16
 11	 23	145.0	18.3	 16
 12	 23	133.3	25.0	 16
 13	 23	132.0	19.2	 16
 14	 23	74.0	13.0	 16
 15	 23	108.8	18.5	 16
 16	 23	172.3	23.6	 16
 17	 23	155.5	22.6	 16
 18	 23	113.3	15.0	 16
 19	 23	290.0	36.8	 16
 20	 23	156.5	19.9	 16
 21	 23	58.3	8.4	 16
 22	 23	272.3	38.7	 16
 23	 23	327.0	28.1	 16
 24	 23	469.5	63.8	 16
 25	 23	311.5	34.2	 16
 26	 23	174.0	22.9	 16
 27	 23	93.5	16.5	 16
 28	 23	64.8	15.6	 16
 29	 23	78.0	10.8	 16
 30	 23	287.0	37.9	 16
 31	 23	202.0	31.3	 16
 32	 23	394.8	63.0	 16
 33	 23	419.0	80.8	 16
 34	 23	63.8	11.6	 16
 35	 23	267.8	47.1	 16
 36	 23	93.3	20.6	 16
 37	 23	134.5	22.6	 16
 38	 23	51.3	12.6	 16
 39	 23	273.3	51.8	 16
 40	 23	156.3	37.1	 16
 41	 23	69.3	14.4	 16
 42	 23	57.0	9.4	 16
 43	 23	69.3	7.0	 16
 44	 23	327.5	36.9	 16
 45	 23	267.0	24.6	 16
 46	 23	95.3	16.1	 16
 47	 23	74.8	18.2	 16
 48	 23	353.3	40.2	 16
 49	 23	80.0	12.3	 16
 50	 23	70.3	9.1	 16
 51	 23	269.5	32.7	 16
 52	 23	452.8	43.0	 16
 53	 23	380.3	41.0	 16
 54	 23	219.0	33.0	 16
 55	 23	247.8	30.7	 16
 56	 23	92.8	19.6	 16
 57	 23	136.5	15.9	 16
 58	 23	83.0	10.5	 16
 59	 23	82.5	14.4	 16
 60	 23	254.3	43.1	 16
 61	 23	107.3	16.1	 16
 62	 23	266.5	52.4	 16
 63	 23	86.3	11.7	 16
 64	 23	835.5	178.7	 16
 65	 23	91.3	8.9	 16
 66	 23	79.8	20.3	 16
 67	 23	73.3	11.9	 16
 68	 23	55.0	9.8	 16
 69	 23	87.0	13.1	 16
 70	 23	159.0	17.8	 16
 71	 23	68.8	8.3	 16
 72	 23	73.0	19.8	 16
 73	 23	189.8	18.3	 16
 74	 23	190.0	25.2	 16
 75	 23	205.5	22.5	 16
 76	 23	124.3	15.8	 16
 77	 23	56.5	9.6	 16
 78	 23	63.0	9.0	 16
 79	 23	132.0	13.6	 16
 80	 23	87.3	13.8	 16
 81	 23	58.5	11.2	 16
 82	 23	62.3	12.1	 16
 83	 23	76.3	15.0	 16
 84	 23	105.5	16.9	 16
 85	 23	101.0	13.7	 16
 86	 23	69.8	12.3	 16
 87	 23	312.3	35.4	 16
 88	 23	174.5	27.7	 16
 89	 23	102.5	15.3	 16
 90	 23	67.3	10.9	 16
 91	 23	162.0	21.5	 16
 92	 23	151.3	12.9	 16
 93	 23	446.5	38.5	 16
 94	 23	167.0	26.8	 16
 95	 23	71.0	11.2	 16
 96	 23	76.0	11.8	 16
 97	 23	105.8	18.0	 16
 98	 23	84.5	12.6	 16
 99	 23	195.5	26.0	 16
100	 23	77.3	13.4	 16
101	 23	103.5	14.9	 16
102	 23	118.5	18.3	 16
103	 23	62.5	12.8	 16
104	 23	317.5	52.2	 16
105	 23	351.8	39.5	 16
106	 23	293.0	39.5	 16
107	 23	56.3	8.6	 16
108	 23	609.5	86.0	 16
109	 23	57.5	9.5	 16
110	 23	71.3	10.5	 16
111	 23	913.3	155.0	 16
112	 23	340.3	46.0	 16
113	 23	71.3	10.5	 16
114	 23	61.5	13.3	 16
115	 23	237.8	41.9	 16
116	 23	57.5	14.3	 16
117	 23	120.0	24.7	 16
118	 23	89.8	16.8	 16
119	 23	70.0	14.1	 16
120	 23	73.5	17.1	 16
121	 23	216.3	23.1	 16
122	 23	80.3	15.5	 16
123	 23	237.3	31.0	 16
124	 23	97.3	9.0	 16
125	 23	288.3	51.8	 20
126	 23	67.8	17.4	 16
127	 23	111.8	19.3	 16
128	 23	172.3	23.4	 16
129	 23	141.8	24.1	 16
130	 23	98.3	16.1	 16
131	 23	158.5	25.5	 16
132	 23	477.0	58.8	 16
133	 23	1522.5	192.8	 16
134	 23	373.5	40.8	 16
135	 23	218.0	29.2	 16
136	 23	767.0	125.8	 16
137	 23	94.5	13.1	 16
138	 23	341.3	53.4	 16
139	 23	113.5	20.3	 16
140	 23	59.5	13.7	 16
141	 23	55.8	11.4	 16
142	 23	81.3	12.0	 16
143	 23	66.3	13.4	 16
144	 23	516.5	74.2	 16
145	 23	120.8	13.5	 16
146	 23	435.0	40.7	 16
147	 23	90.3	18.5	 16
148	 23	130.5	25.3	 16
149	 23	117.0	16.1	 16
150	 23	64.5	10.7	 16
151	 23	111.0	15.0	 16
152	 23	265.5	27.5	 16
153	 23	338.0	43.9	 16
154	 23	185.5	28.0	 16
155	 23	197.8	29.9	 16
156	 23	204.0	27.9	 16
157	 23	80.5	13.0	 16
158	 23	390.5	50.5	 16
159	 23	164.0	29.6	 16
160	 23	1619.5	192.7	 16
161	 23	1372.8	166.5	 16
162	 23	57.3	11.3	 16
163	 23	73.0	14.9	 16
164	 23	573.3	82.8	 16
165	 23	61.8	10.5	 16
166	 23	53.3	11.4	 16
167	 23	299.3	44.3	 16
168	 23	78.5	15.2	 16
169	 23	160.5	29.0	 16
170	 23	234.0	24.7	 16
171	 23	54.5	9.2	 16
172	 23	242.8	27.1	 16
173	 23	149.8	31.4	 16
174	 23	224.0	26.2	 16
175	 23	153.3	27.7	 16
176	 23	134.3	18.7	 16
177	 23	132.5	17.2	 16
178	 23	95.8	17.0	 16
179	 23	119.5	18.9	 16
180	 23	103.5	13.3	 16
181	 23	174.0	30.0	 16
182	 23	196.0	20.0	 16
183	 23	72.3	11.7	 16
184	 23	129.5	19.4	 16
185	 23	92.5	11.2	 16
186	 23	59.3	12.6	 16
187	 23	128.3	21.1	 16
188	 23	218.8	31.8	 16
189	 23	254.3	41.2	 16
190	 23	141.5	25.2	 16
191	 23	139.8	25.6	 16
192	 23	71.5	14.6	 16
193	 23	84.5	31.0	 16
194	 23	80.3	10.4	 16
195	 23	90.3	17.9	 16
196	 23	469.5	81.4	 16
197	 23	67.0	9.3	 16
198	 23	83.5	10.5	 16
199	 23	72.3	11.1	 16
200	 23	285.0	28.5	 16
201	 23	86.3	34.3	 16
202	 23	56.3	10.6	 16
203	 23	346.8	35.9	 16
204	 23	168.8	32.6	 16
205	 23	185.8	25.5	 16
206	 23	307.3	49.9	 16
207	 23	63.8	13.3	 16
208	 23	124.5	21.2	 16
209	 23	154.0	13.7	 16
210	 23	266.5	35.1	 16
211	 23	665.3	49.4	 16
212	 23	110.0	18.0	 16
213	 23	981.8	127.0	 16
214	 23	69.5	13.2	 16
215	 23	748.5	106.1	 16
216	 23	141.3	23.0	 16
217	 23	83.5	16.7	 16
218	 23	65.3	13.9	 16
219	 23	1662.3	287.9	 16
220	 23	86.3	14.7	 16
221	 23	84.0	16.4	 16
222	 23	301.3	61.9	 16
223	 23	57.0	16.2	 16
224	 23	786.8	112.2	 16
225	 23	355.0	37.1	 16
226	 23	93.0	16.9	 16
227	 23	98.3	13.4	 16
228	 23	95.8	16.3	 16
229	 23	149.8	27.4	 16
230	 23	104.5	18.1	 16
231	 23	616.5	68.5	 16
232	 23	442.5	53.9	 16
233	 23	220.0	18.5	 16
234	 23	58.0	10.7	 16
235	 23	775.3	82.2	 16
236	 23	93.8	17.7	 16
237	 23	62.5	16.1	 16
238	 23	53.3	8.5	 16
239	 23	504.0	63.1	 16
240	 23	164.5	22.8	 16
241	 23	114.0	18.1	 16
242	 23	73.0	16.1	 16
243	 23	74.5	10.4	 16
244	 23	347.0	74.1	 20
245	 23	306.5	38.4	 16
246	 23	72.8	14.8	 16
247	 23	61.5	10.3	 16
248	 23	150.3	31.6	 16
249	 23	131.3	26.9	 16
250	 23	153.8	40.0	 16
251	 23	68.8	14.5	 16
252	 23	132.3	22.9	 16
253	 23	68.0	6.6	 16
254	 23	62.3	10.4	 16
255	 23	57.3	9.2	 16
256	 23	169.8	26.6	 16
257	 23	93.3	10.2	 16
258	 23	127.8	21.7	 16
259	 23	267.5	34.8	 16
260	 23	2585.0	202.6	 16
261	 23	2817.3	108.7	 16
262	 23	2813.8	443.9	 16
263	 23	63.0	11.0	 16
264	 23	75.3	10.5	 16
265	 23	63.0	10.1	 16
266	 23	253.8	21.9	 16
267	 23	116.8	15.0	 16
268	 23	136.0	20.6	 16
269	 23	99.5	18.3	 16
270	 23	184.8	26.3	 16
271	 23	93.8	16.8	 16
272	 23	916.8	162.0	 16
273	 23	7255.0	1113.7	 16
274	 23	89.3	14.8	 16
275	 23	162.0	21.6	 16
276	 23	242.5	37.9	 16
277	 23	66.3	8.7	 16
278	 23	280.3	25.6	 16
279	 23	1052.8	105.2	 16
280	 23	113.0	32.9	 16
281	 23	132.3	19.9	 16
282	 23	175.3	24.1	 16
283	 23	368.5	39.6	 16
284	 23	83.5	14.5	 16
285	 23	68.5	16.0	 16
286	 23	107.8	16.9	 16
287	 23	226.8	32.3	 16
288	 23	68.5	12.4	 16
289	 23	570.5	47.3	 16
290	 23	1124.5	102.0	 16
291	 23	237.5	38.4	 16
292	 23	145.3	18.7	 16
293	 23	151.3	13.8	 16
294	 23	185.0	30.1	 16
295	 23	168.0	22.1	 16
296	 23	57.0	7.0	 16
297	 23	62.0	13.5	 16
298	 23	309.8	26.1	 16
299	 23	1077.8	140.9	 16
300	 23	84.8	9.8	 16
301	 23	84.3	14.4	 16
302	 23	2309.0	405.6	 16
303	 23	63.5	8.6	 16
304	 23	151.8	18.9	 16
305	 23	155.8	20.4	 16
306	 23	350.5	30.8	 16
307	 23	395.5	33.3	 16
308	 23	84.3	15.8	 16
309	 23	108.5	15.3	 16
310	 23	93.8	11.3	 16
311	 23	357.5	39.6	 16
312	 23	631.0	49.8	 16
313	 23	75.8	11.4	 16
314	 23	382.3	60.7	 16
315	 23	62.8	10.6	 16
316	 23	127.0	20.1	 16
317	 23	74.0	10.7	 16
318	 23	74.3	12.9	 16
319	 23	77.3	18.0	 16
320	 23	90.8	10.7	 16
321	 23	88.0	14.9	 16
322	 23	202.3	26.6	 16
323	 23	85.8	10.7	 16
324	 23	162.5	29.7	 16
325	 23	933.0	116.8	 16
326	 23	149.5	20.4	 16
327	 23	72.8	12.6	 16
328	 23	340.0	61.1	 16
329	 23	81.3	10.3	 16
330	 23	462.0	56.2	 16
331	 23	89.3	16.9	 16
332	 23	131.3	16.0	 16
333	 23	57.3	8.8	 16
334	 23	72.5	15.2	 16
335	 23	53.0	10.7	 16
336	 23	88.0	13.6	 16
337	 23	75.8	15.7	 16
338	 23	130.3	15.7	 16
339	 23	53.0	12.0	 16
340	 23	73.5	12.9	 16
341	 23	133.3	19.5	 16
342	 23	110.3	18.8	 16
343	 23	109.0	15.8	 16
344	 23	186.5	29.1	 16
345	 23	402.8	42.6	 16
346	 23	94.5	19.8	 16
347	 23	61.0	10.6	 16
348	 23	169.3	29.8	 16
349	 23	284.5	50.8	 16
350	 23	167.0	24.9	 16
351	 23	57.5	12.0	 16
352	 23	286.8	48.8	 16
353	 23	81.3	14.4	 16
354	 23	556.8	124.8	 16
355	 23	69.8	13.8	 16
356	 23	282.0	38.8	 16
357	 23	96.0	15.3	 16
358	 23	710.0	42.7	 16
359	 23	267.8	22.0	 16
360	 23	161.3	22.2	 16
361	 23	320.5	46.7	 16
362	 23	664.0	83.1	 16
363	 23	223.5	29.7	 20
364	 23	89.5	14.5	 16
365	 23	353.0	45.1	 16
366	 23	57.5	8.4	 16
367	 23	52.3	11.6	 16
368	 23	69.8	15.7	 16
369	 23	57.8	10.4	 16
370	 23	136.3	14.6	 16
371	 23	57.0	12.6	 16
372	 23	410.5	54.7	 16
373	 23	454.8	72.9	 16
374	 23	55.3	6.6	 16
375	 23	69.0	12.4	 16
376	 23	59.3	11.2	 16
377	 23	417.5	57.7	 16
378	 23	140.8	21.7	 16
379	 23	221.8	44.0	 16
380	 23	161.3	31.4	 16
381	 23	3439.8	670.3	 16
382	 23	159.5	20.8	 16
383	 23	67.3	12.7	 16
384	 23	66.0	13.6	 16
385	 23	77.3	12.6	 16
386	 23	75.5	13.9	 16
387	 23	89.3	16.8	 16
388	 23	63.0	10.6	 16
389	 23	113.5	22.3	 16
390	 23	94.5	18.0	 16
391	 23	989.8	100.0	 16
392	 23	57.8	11.3	 16
393	 23	92.8	30.7	 16
394	 23	519.3	74.7	 16
395	 23	123.5	20.8	 16
396	 23	92.8	31.8	 16
397	 23	545.0	62.6	 16
398	 23	119.3	16.6	 16
399	 23	272.8	38.0	 16
400	 23	837.0	115.5	 16
401	 23	137.5	40.0	 16
402	 23	2131.5	341.3	 16
403	 23	6975.0	938.8	 16
404	 23	138.3	22.6	 16
405	 23	2666.5	455.6	 16
406	 23	88.3	13.9	 16
407	 23	130.0	21.3	 16
408	 23	187.3	34.2	 16
409	 23	102.8	18.3	 16
410	 23	171.0	31.2	 16
411	 23	150.8	21.3	 16
412	 23	367.0	27.7	 16
413	 23	561.5	45.1	 16
414	 23	53.5	11.2	 16
415	 23	145.0	19.5	 16
416	 23	176.3	24.4	 16
417	 23	133.3	22.4	 16
418	 23	249.0	25.8	 16
419	 23	150.5	15.7	 16
420	 23	61.3	9.1	 16
421	 23	69.8	12.3	 16
422	 23	447.0	35.8	 16
423	 23	60.5	12.3	 16
424	 23	53.8	10.6	 16
425	 23	76.5	12.0	 16
426	 23	2536.0	260.9	 16
427	 23	262.5	39.6	 16
428	 23	327.8	48.8	 16
429	 23	5181.5	590.5	 16
430	 23	2427.0	352.1	 16
431	 23	59.0	14.0	 16
432	 23	151.0	29.2	 16
433	 23	106.0	18.5	 16
434	 23	245.3	38.5	 16
435	 23	518.3	49.1	 16
436	 23	374.8	37.0	 16
437	 23	183.0	27.5	 16
438	 23	138.8	19.9	 16
439	 23	387.5	40.0	 16
440	 23	67.3	11.4	 16
441	 23	201.0	30.8	 16
442	 23	133.3	21.6	 16
443	 23	90.5	14.2	 16
444	 23	105.0	21.3	 16
445	 23	221.5	22.4	 16
446	 23	290.3	29.0	 16
447	 23	649.3	45.8	 16
448	 23	234.5	26.1	 16
449	 23	159.3	27.8	 16
450	 23	447.5	45.5	 16
451	 23	342.0	32.3	 16
452	 23	276.0	34.6	 16
453	 23	181.8	28.3	 16
454	 23	73.8	10.8	 16
455	 23	907.8	117.7	 16
456	 23	94.5	13.4	 16
457	 23	128.3	12.0	 16
458	 23	421.8	55.7	 16
459	 23	494.3	79.6	 16
460	 23	212.8	41.7	 16
461	 23	786.5	90.3	 16
462	 23	226.5	27.5	 16
463	 23	148.5	17.7	 16
464	 23	232.8	29.3	 16
465	 23	94.5	12.3	 16
466	 23	50.8	10.2	 16
467	 23	66.8	14.1	 16
468	 23	647.0	74.1	 16
469	 23	123.3	16.3	 16
470	 23	55.3	12.7	 16
471	 23	59.8	8.3	 16
472	 23	911.8	131.5	 16
473	 23	192.5	27.6	 16
474	 23	343.3	31.7	 16
475	 23	799.5	127.0	 16
476	 23	198.5	29.9	 16
477	 23	284.0	34.3	 16
478	 23	120.3	18.7	 16
479	 23	685.5	49.9	 16
480	 23	128.3	23.3	 16
481	 23	59.8	8.6	 20
482	 23	84.3	14.9	 16
483	 23	63.0	11.9	 16
484	 23	576.0	74.4	 16
485	 23	176.0	31.9	 16
486	 23	141.5	19.8	 16
487	 23	121.5	22.8	 16
488	 23	81.5	14.7	 16
489	 23	955.5	145.1	 16
490	 23	104.3	24.4	 16
491	 23	121.8	26.2	 16
492	 23	133.3	24.0	 16
493	 23	901.5	114.2	 16
494	 23	100.8	22.5	 16
495	 23	87.3	12.3	 16
496	 23	58.8	12.1	 16
497	 23	1353.3	190.4	 16
498	 23	97.3	16.0	 16
499	 23	189.3	35.5	 16
500	 23	103.5	18.1	 16
501	 23	80.3	16.4	 16
502	 23	222.5	29.0	 16
503	 23	83.5	13.2	 16
504	 23	279.8	53.6	 16
505	 23	517.5	66.5	 16
506	 23	172.8	47.0	 16
507	 23	121.3	18.6	 16
508	 23	62.3	16.0	 16
509	 23	101.0	16.9	 16
510	 23	102.0	21.3	 16
511	 23	686.5	138.3	 16
512	 23	78.3	16.4	 16
513	 23	142.0	26.4	 16
514	 23	65.0	11.7	 16
515	 23	55.5	13.3	 16
516	 23	103.3	16.4	 16
517	 23	53.0	11.7	 16
518	 23	100.5	11.4	 16
519	 23	72.0	8.4	 16
520	 23	106.3	20.6	 16
521	 23	744.5	50.0	 16
522	 23	2033.3	246.5	 16
523	 23	135.5	16.2	 16
524	 23	557.3	73.1	 16
525	 23	71.5	12.5	 16
526	 23	68.5	12.6	 16
527	 23	190.0	28.9	 16
528	 23	228.5	28.2	 16
529	 23	261.3	30.8	 16
530	 23	408.0	39.8	 16
531	 23	102.8	17.2	 16
532	 23	8373.5	1159.4	 16
533	 23	201.3	35.6	 16
534	 23	331.0	47.1	 16
535	 23	575.5	91.7	 16
536	 23	138.3	26.6	 16
537	 23	304.8	54.9	 16
538	 23	100.0	16.6	 16
539	 23	84.5	12.9	 16
540	 23	295.3	64.9	 16
541	 23	62.5	7.1	 16
542	 23	60.3	11.6	 16
543	 23	3521.3	274.7	 16
544	 23	146.3	16.4	 16
545	 23	89.3	13.4	 16
546	 23	79.0	13.2	 16
547	 23	130.0	22.9	 16
548	 23	74.3	14.1	 16
549	 23	245.0	27.7	 16
550	 23	133.8	28.1	 16
551	 23	509.8	47.5	 16
552	 23	97.0	18.6	 16
553	 23	158.8	24.7	 16
554	 23	150.3	21.4	 16
555	 23	194.3	31.2	 16
556	 23	510.8	93.7	 16
557	 23	145.3	25.4	 16
558	 23	109.5	16.9	 16
559	 23	62.0	13.0	 16
560	 23	56.8	10.5	 16
561	 23	5870.0	1046.8	 16
562	 23	89.3	14.7	 16
563	 23	136.0	20.7	 16
564	 23	201.0	56.3	 16
565	 23	521.0	108.1	 16
566	 23	1094.3	305.4	 16
567	 23	1137.8	187.4	 16
568	 23	768.0	91.8	 16
569	 23	112.0	14.9	 16
570	 23	141.5	30.6	 16
571	 23	70.8	10.4	 16
572	 23	192.5	29.3	 16
573	 23	1551.5	234.3	 16
574	 23	531.0	98.3	 16
575	 23	1665.3	269.3	 16
576	 23	146.3	27.4	 16
577	 23	67.0	9.0	 16
578	 23	1711.8	356.9	 16
579	 23	95.0	14.7	 16
580	 23	65.5	13.4	 16
581	 23	607.5	126.9	 16
582	 23	573.5	142.5	 16
583	 23	84.3	15.3	 16
584	 23	246.8	58.6	 16
585	 23	71.0	13.1	 16
586	 23	1673.8	412.6	 16
587	 23	2024.0	522.7	 16
588	 23	139.3	21.1	 16
589	 23	1554.3	422.2	 16
590	 23	967.3	271.6	 16
591	 23	111.0	17.8	 16
592	 23	602.3	147.4	 16
593	 23	780.0	56.3	 16
594	 23	1219.8	290.9	 16
595	 23	84.8	15.6	 16
596	 23	298.3	76.7	 16
597	 23	60.0	9.4	 16
598	 23	75.5	14.0	 16
599	 23	333.0	63.3	 16
600	 23	114.0	19.2	 20
601	 23	60.0	8.8	 16
602	 23	76.8	14.0	 16
603	 23	2705.8	259.1	 16
604	 23	60.3	9.5	 16
605	 23	253.5	26.5	 16
606	 23	173.0	26.2	 16
607	 23	190.8	17.8	 16
608	 23	774.3	78.3	 16
609	 23	241.0	34.2	 16
610	 23	185.8	30.8	 16
611	 23	508.8	73.6	 16
612	 23	793.5	103.7	 16
613	 23	143.3	17.0	 16
614	 23	805.0	95.9	 16
615	 23	185.5	19.5	 16
616	 23	253.8	32.3	 16
617	 23	100.0	19.2	 16
618	 23	429.0	75.8	 16
619	 23	281.3	64.0	 16
620	 23	140.3	16.8	 16
621	 23	138.8	27.4	 16
622	 23	155.0	18.0	 16
623	 23	258.5	30.1	 16
624	 23	128.8	15.0	 16
625	 23	146.5	19.8	 16
626	 23	142.5	22.6	 16
627	 23	110.3	15.5	 16
628	 23	122.3	18.5	 16
629	 23	68.3	13.3	 16
630	 23	68.0	11.5	 16
631	 23	177.8	30.1	 16
632	 23	94.3	17.8	 16
633	 23	172.3	19.8	 16
634	 23	1475.0	228.4	 16
635	 23	650.5	65.3	 16
636	 23	438.0	69.8	 16
637	 23	469.3	64.3	 16
638	 23	114.0	19.4	 16
639	 23	206.5	36.7	 16
640	 23	1939.5	289.6	 16
641	 23	96.8	17.3	 16
642	 23	100.0	17.7	 16
643	 23	79.8	11.9	 16
644	 23	433.5	79.5	 16
645	 23	113.0	16.8	 16
646	 23	413.0	47.5	 16
647	 23	102.5	15.8	 16
648	 23	299.8	43.2	 16
649	 23	188.8	20.2	 16
650	 23	132.3	21.8	 16
651	 23	156.8	21.3	 16
652	 23	107.3	18.2	 16
653	 23	126.8	21.9	 16
654	 23	72.0	15.6	 16
655	 23	75.3	12.3	 16
656	 23	198.3	40.9	 16
657	 23	140.3	25.2	 16
658	 23	129.8	19.9	 16
659	 23	233.5	24.5	 16
660	 23	180.8	29.1	 16
661	 23	59.8	10.3	 16
662	 23	252.5	25.0	 16
663	 23	191.0	26.4	 16
664	 23	199.3	19.1	 16
665	 23	106.5	19.2	 16
666	 23	78.5	12.9	 16
667	 23	99.5	12.7	 16
668	 23	58.5	7.3	 16
669	 23	81.3	18.3	 16
670	 23	80.0	17.5	 16
671	 23	240.5	44.1	 16
672	 23	98.3	13.5	 16
673	 23	66.3	11.9	 16
674	 23	78.3	12.1	 16
675	 23	105.0	23.5	 16
676	 23	185.8	19.6	 16
677	 23	178.3	23.6	 16
678	 23	83.5	13.2	 16
679	 23	68.5	19.2	 16
680	 23	56.5	9.3	 16
681	 23	144.0	19.5	 16
682	 23	1500.8	186.1	 16
683	 23	135.5	16.9	 16
684	 23	319.5	38.6	 16
685	 23	131.0	23.6	 16
686	 23	132.0	23.3	 16
687	 23	108.5	17.9	 16
688	 23	360.0	41.7	 16
689	 23	171.3	36.4	 16
690	 23	122.0	20.0	 16
691	 23	121.0	19.1	 16
692	 23	54.3	8.3	 16
693	 23	124.3	22.6	 16
694	 23	634.8	106.6	 16
695	 23	167.5	40.6	 16
696	 23	57.3	7.5	 16
697	 23	71.3	14.0	 16
698	 23	62.3	11.2	 16
699	 23	62.5	15.4	 16
700	 23	326.0	55.9	 16
701	 23	269.0	27.4	 16
702	 23	286.3	29.6	 16
703	 23	413.8	66.6	 16
704	 23	181.3	28.8	 16
705	 23	192.8	21.7	 16
706	 23	183.0	21.8	 16
707	 23	190.5	24.9	 16
708	 23	170.3	32.6	 16
709	 23	164.3	25.4	 16
710	 23	94.5	13.0	 16
711	 23	91.3	13.0	 16
  0	 24	7891.3	1585.9	 16
  1	 24	120.8	32.3	 16
  2	 24	75.8	21.6	 16
  3	 24	73.0	13.8	 16
  4	 24	341.3	77.3	 16
  5	 24	70.3	9.1	 16
  6	 24	158.3	25.9	 16
  7	 24	138.5	18.1	 16
  8	 24	132.3	26.4	 16
  9	 24	67.0	15.7	 16
 10	 24	79.0	14.5	 20
 11	 24	231.0	35.3	 16
 12	 24	83.3	15.6	 16
 13	 24	417.0	42.6	 16
 14	 24	80.8	12.0	 16
 15	 24	162.0	36.3	 16
 16	 24	81.5	14.9	 16
 17	 24	69.8	14.9	 16
 18	 24	95.5	18.4	 16
 19	 24	135.8	23.1	 16
 20	 24	117.5	19.6	 16
 21	 24	61.0	9.7	 16
 22	 24	134.5	25.8	 16
 23	 24	183.0	26.4	 16
 24	 24	495.3	47.7	 16
 25	 24	388.5	45.0	 16
 26	 24	85.3	16.1	 16
 27	 24	89.5	12.8	 16
 28	 24	67.3	12.9	 16
 29	 24	143.0	24.1	 16
 30	 24	176.3	29.9	 16
 31	 24	423.3	55.1	 16
 32	 24	136.5	18.6	 16
 33	 24	158.3	21.3	 16
 34	 24	76.8	8.1	 16
 35	 24	100.3	22.7	 16
 36	 24	199.5	31.7	 16
 37	 24	64.8	13.2	 16
 38	 24	51.5	11.0	 16
 39	 24	74.3	10.1	 16
 40	 24	74.3	14.9	 16
 41	 24	65.8	14.8	 16
 42	 24	62.8	8.6	 16
 43	 24	59.0	10.0	 16
 44	 24	95.5	20.1	 16
 45	 24	385.3	74.2	 16
 46	 24	87.5	17.5	 16
 47	 24	96.0	15.1	 16
 48	 24	162.8	22.5	 16
 49	 24	106.5	13.8	 16
 50	 24	68.0	11.3	 16
 51	 24	122.3	21.3	 16
 52	 24	499.8	75.0	 16
 53	 24	360.0	41.9	 16
 54	 24	304.3	102.9	 16
 55	 24	344.5	41.1	 16
 56	 24	75.3	14.9	 16
 57	 24	83.0	14.6	 16
 58	 24	59.3	11.9	 16
 59	 24	68.5	13.5	 16
 60	 24	65.3	15.0	 16
 61	 24	80.8	14.7	 16
 62	 24	83.8	15.6	 16
 63	 24	92.3	14.2	 16
 64	 24	158.8	24.4	 16
 65	 24	71.0	11.3	 16
 66	 24	72.3	13.4	 16
 67	 24	71.0	13.1	 16
 68	 24	58.5	11.4	 16
 69	 24	87.8	13.2	 16
 70	 24	143.0	18.6	 16
 71	 24	79.5	20.7	 16
 72	 24	71.8	10.4	 16
 73	 24	158.3	26.9	 16
 74	 24	100.8	17.9	 16
 75	 24	99.3	18.5	 16
 76	 24	134.3	22.0	 16
 77	 24	51.5	8.6	 16
 78	 24	64.5	10.7	 16
 79	 24	76.5	15.2	 16
 80	 24	73.8	16.5	 16
 81	 24	65.3	11.2	 16
 82	 24	108.8	19.6	 16
 83	 24	57.8	9.5	 16
 84	 24	61.0	14.5	 16
 85	 24	66.3	11.6	 16
 86	 24	72.0	14.9	 16
 87	 24	110.3	18.9	 16
 88	 24	133.3	23.3	 16
 89	 24	65.5	11.9	 16
 90	 24	66.3	10.2	 16
 91	 24	71.0	14.7	 16
 92	 24	81.3	13.5	 16
 93	 24	123.8	26.3	 16
 94	 24	166.5	17.7	 16
 95	 24	80.8	16.2	 16
 96	 24	71.0	12.0	 16
 97	 24	61.3	8.7	 16
 98	 24	86.0	17.9	 16
 99	 24	81.0	12.6	 16
100	 24	72.0	10.1	 16
101	 24	98.0	17.9	 16
102	 24	134.3	24.0	 16
103	 24	53.3	10.4	 16
104	 24	115.3	10.7	 16
105	 24	150.8	22.5	 16
106	 24	94.5	18.7	 16
107	 24	66.5	12.7	 16
108	 24	101.3	24.2	 16
109	 24	54.0	10.4	 16
110	 24	67.0	10.9	 16
111	 24	182.5	34.1	 16
112	 24	185.3	15.7	 16
113	 24	79.5	11.3	 16
114	 24	56.5	14.4	 16
115	 24	53.8	10.6	 16
116	 24	62.3	9.2	 16
117	 24	70.0	7.5	 16
118	 24	66.3	19.4	 16
119	 24	62.0	14.5	 16
120	 24	61.5	13.2	 16
121	 24	90.8	14.6	 16
122	 24	52.0	9.2	 16
123	 24	78.0	8.8	 16
124	 24	66.0	11.2	 16
125	 24	61.3	9.9	 16
126	 24	77.3	18.1	 16
127	 24	80.3	9.4	 16
128	 24	85.3	12.0	 20
129	 24	83.3	10.5	 16
130	 24	96.3	12.9	 16
131	 24	81.0	14.1	 16
132	 24	126.3	15.5	 16
133	 24	562.0	64.2	 16
134	 24	408.5	37.5	 16
135	 24	144.3	30.5	 16
136	 24	354.5	39.2	 16
137	 24	97.3	12.6	 16
138	 24	178.0	34.3	 16
139	 24	89.5	15.1	 16
140	 24	61.0	10.7	 16
141	 24	55.8	10.3	 16
142	 24	58.3	8.6	 16
143	 24	56.0	8.0	 16
144	 24	152.8	21.0	 16
145	 24	117.5	24.5	 16
146	 24	199.0	17.5	 16
147	 24	66.3	12.7	 16
148	 24	62.8	10.7	 16
149	 24	62.8	9.3	 16
150	 24	79.3	14.5	 16
151	 24	142.0	23.4	 16
152	 24	190.0	33.5	 16
153	 24	188.8	21.5	 16
154	 24	143.8	26.2	 16
155	 24	126.5	20.2	 16
156	 24	105.8	10.1	 16
157	 24	148.0	23.4	 16
158	 24	125.3	16.6	 16
159	 24	63.0	9.8	 16
160	 24	559.0	65.1	 16
161	 24	371.8	32.3	 16
162	 24	53.3	9.0	 16
163	 24	55.0	13.0	 16
164	 24	167.0	29.2	 16
165	 24	66.5	13.3	 16
166	 24	58.3	9.9	 16
167	 24	118.5	15.7	 16
168	 24	81.8	14.2	 16
169	 24	84.3	20.2	 16
170	 24	126.3	30.0	 16
171	 24	60.3	7.8	 16
172	 24	104.3	18.4	 16
173	 24	1060.5	121.0	 16
174	 24	76.0	11.8	 16
175	 24	57.3	9.0	 16
176	 24	62.3	11.5	 16
177	 24	72.3	13.0	 16
178	 24	76.5	43.6	 16
179	 24	68.3	10.4	 16
180	 24	378.5	51.2	 16
181	 24	210.8	28.7	 16
182	 24	95.5	19.5	 16
183	 24	83.8	14.8	 16
184	 24	127.8	24.6	 16
185	 24	64.5	11.5	 16
186	 24	54.0	7.9	 16
187	 24	74.3	12.3	 16
188	 24	276.8	40.0	 16
189	 24	362.8	35.1	 16
190	 24	177.0	22.9	 16
191	 24	164.0	22.6	 16
192	 24	105.3	19.0	 16
193	 24	87.8	13.1	 16
194	 24	103.8	12.4	 16
195	 24	65.8	14.4	 16
196	 24	191.3	26.2	 16
197	 24	99.5	14.6	 16
198	 24	93.0	20.0	 16
199	 24	70.8	10.8	 16
200	 24	126.5	14.2	 16
201	 24	63.3	11.9	 16
202	 24	59.0	9.6	 16
203	 24	97.5	12.2	 16
204	 24	63.0	8.9	 16
205	 24	73.0	12.3	 16
206	 24	106.0	21.1	 16
207	 24	51.5	8.9	 16
208	 24	69.0	15.9	 16
209	 24	121.0	17.6	 16
210	 24	83.3	14.6	 16
211	 24	94.0	49.8	 16
212	 24	86.8	18.7	 16
213	 24	206.8	31.0	 16
214	 24	68.8	14.5	 16
215	 24	217.5	19.5	 16
216	 24	59.0	10.5	 16
217	 24	52.0	9.0	 16
218	 24	59.5	13.4	 16
219	 24	273.0	42.1	 16
220	 24	70.0	13.2	 16
221	 24	154.3	29.0	 16
222	 24	57.5	10.8	 16
223	 24	55.0	7.0	 16
224	 24	93.3	19.3	 16
225	 24	140.8	27.4	 16
226	 24	65.0	14.1	 16
227	 24	77.0	8.0	 16
228	 24	63.0	9.2	 16
229	 24	80.0	10.2	 16
230	 24	101.8	15.8	 16
231	 24	198.8	34.7	 16
232	 24	786.0	60.4	 16
233	 24	206.3	23.0	 16
234	 24	55.5	13.5	 16
235	 24	138.0	12.6	 16
236	 24	74.0	12.0	 16
237	 24	53.3	8.4	 16
238	 24	57.0	11.3	 16
239	 24	850.3	86.2	 16
240	 24	111.0	25.5	 16
241	 24	105.8	17.0	 16
242	 24	67.3	13.0	 16
243	 24	70.3	11.1	 16
244	 24	72.3	7.0	 16
245	 24	98.0	17.5	 16
246	 24	72.3	24.4	 16
247	 24	53.3	9.6	 20
248	 24	100.0	18.5	 16
249	 24	99.5	17.5	 16
250	 24	77.3	10.7	 16
251	 24	55.5	9.2	 16
252	 24	127.3	16.5	 16
253	 24	56.3	9.9	 16
254	 24	58.5	12.4	 16
255	 24	54.8	10.4	 16
256	 24	198.8	20.7	 16
257	 24	118.5	18.7	 16
258	 24	175.0	29.1	 16
259	 24	123.8	26.8	 16
260	 24	897.3	78.7	 16
261	 24	1000.0	70.2	 16
262	 24	991.0	211.8	 16
263	 24	59.3	12.2	 16
264	 24	58.3	11.0	 16
265	 24	55.3	7.5	 16
266	 24	75.8	9.4	 16
267	 24	101.8	15.2	 16
268	 24	129.0	22.4	 16
269	 24	109.3	20.1	 16
270	 24	102.3	19.1	 16
271	 24	77.3	11.3	 16
272	 24	217.0	43.4	 16
273	 24	1858.8	241.0	 16
274	 24	59.8	7.8	 16
275	 24	92.8	16.9	 16
276	 24	173.0	26.4	 16
277	 24	58.5	11.6	 16
278	 24	126.5	23.2	 16
279	 24	287.5	39.4	 16
280	 24	84.8	18.9	 16
281	 24	97.0	22.1	 16
282	 24	197.0	31.1	 16
283	 24	273.0	37.9	 16
284	 24	71.3	9.8	 16
285	 24	64.8	13.2	 16
286	 24	65.8	11.7	 16
287	 24	54.5	8.5	 16
288	 24	67.3	11.6	 16
289	 24	582.5	69.8	 16
290	 24	208.5	28.3	 16
291	 24	253.5	31.5	 16
292	 24	244.5	25.7	 16
293	 24	94.0	14.7	 16
294	 24	122.5	11.8	 16
295	 24	90.5	14.3	 16
296	 24	59.3	9.0	 16
297	 24	54.3	8.9	 16
298	 24	88.3	14.8	 16
299	 24	225.0	44.9	 16
300	 24	70.3	13.7	 16
301	 24	53.0	8.7	 16
302	 24	181.8	38.6	 16
303	 24	89.5	16.3	 16
304	 24	124.3	15.3	 16
305	 24	124.3	16.1	 16
306	 24	119.5	19.0	 16
307	 24	128.0	15.2	 16
308	 24	64.3	10.6	 16
309	 24	72.0	13.6	 16
310	 24	117.3	19.2	 16
311	 24	190.5	21.9	 16
312	 24	109.0	15.5	 16
313	 24	74.8	11.3	 16
314	 24	183.8	29.7	 16
315	 24	56.3	11.8	 16
316	 24	68.3	12.3	 16
317	 24	58.3	8.7	 16
318	 24	67.0	12.3	 16
319	 24	69.8	10.2	 16
320	 24	146.5	18.3	 16
321	 24	89.3	14.5	 16
322	 24	95.0	20.1	 16
323	 24	70.3	15.0	 16
324	 24	86.3	11.3	 16
325	 24	205.8	25.2	 16
326	 24	280.0	40.7	 16
327	 24	80.8	16.2	 16
328	 24	334.8	42.4	 16
329	 24	74.5	17.3	 16
330	 24	125.8	18.9	 16
331	 24	76.5	11.8	 16
332	 24	81.8	16.4	 16
333	 24	56.8	7.2	 16
334	 24	58.3	11.1	 16
335	 24	62.0	11.9	 16
336	 24	69.8	10.4	 16
337	 24	64.3	11.7	 16
338	 24	92.8	21.6	 16
339	 24	49.3	9.0	 16
340	 24	85.0	16.1	 16
341	 24	112.3	18.2	 16
342	 24	90.0	17.4	 16
343	 24	177.5	24.5	 16
344	 24	94.5	19.3	 16
345	 24	418.8	43.9	 16
346	 24	152.5	20.2	 16
347	 24	66.5	14.5	 16
348	 24	114.0	12.7	 16
349	 24	184.0	27.9	 16
350	 24	91.3	13.5	 16
351	 24	55.8	7.7	 16
352	 24	82.3	35.3	 16
353	 24	74.8	16.7	 16
354	 24	84.8	18.0	 16
355	 24	56.0	11.5	 16
356	 24	361.0	36.2	 16
357	 24	78.5	13.2	 16
358	 24	170.0	25.9	 16
359	 24	180.8	22.2	 16
360	 24	87.5	13.1	 16
361	 24	384.0	61.0	 16
362	 24	259.3	45.2	 16
363	 24	77.3	8.3	 16
364	 24	90.3	12.9	 16
365	 24	176.0	21.2	 16
366	 24	61.3	10.6	 20
367	 24	57.3	10.1	 16
368	 24	51.5	9.0	 16
369	 24	56.5	6.8	 16
370	 24	105.0	16.6	 16
371	 24	67.0	10.8	 16
372	 24	127.0	23.8	 16
373	 24	131.0	17.9	 16
374	 24	61.8	11.9	 16
375	 24	70.3	11.0	 16
376	 24	73.0	12.9	 16
377	 24	202.3	28.1	 16
378	 24	212.8	24.5	 16
379	 24	300.5	27.2	 16
380	 24	112.3	31.7	 16
381	 24	733.3	110.8	 16
382	 24	117.5	17.7	 16
383	 24	65.0	8.6	 16
384	 24	75.3	14.1	 16
385	 24	50.0	12.3	 16
386	 24	62.0	9.6	 16
387	 24	146.8	20.8	 16
388	 24	55.8	9.3	 16
389	 24	76.0	11.8	 16
390	 24	92.3	16.0	 16
391	 24	126.0	19.1	 16
392	 24	59.8	10.9	 16
393	 24	80.3	16.0	 16
394	 24	82.0	11.7	 16
395	 24	58.5	5.8	 16
396	 24	61.5	13.3	 16
397	 24	136.3	21.0	 16
398	 24	86.5	16.8	 16
399	 24	102.5	14.0	 16
400	 24	242.0	30.1	 16
401	 24	61.5	12.2	 16
402	 24	224.3	32.6	 16
403	 24	2836.0	187.2	 16
404	 24	92.5	15.1	 16
405	 24	808.5	93.6	 16
406	 24	46.3	7.4	 16
407	 24	64.3	11.0	 16
408	 24	338.8	27.7	 16
409	 24	223.8	25.6	 16
410	 24	163.5	26.7	 16
411	 24	69.5	9.8	 16
412	 24	108.3	17.4	 16
413	 24	150.3	24.0	 16
414	 24	54.3	8.2	 16
415	 24	77.3	9.9	 16
416	 24	99.3	17.5	 16
417	 24	128.3	17.1	 16
418	 24	95.3	13.2	 16
419	 24	216.8	34.7	 16
420	 24	67.3	14.9	 16
421	 24	56.3	10.0	 16
422	 24	274.8	26.5	 16
423	 24	58.8	11.0	 16
424	 24	65.5	11.3	 16
425	 24	71.0	11.4	 16
426	 24	615.8	55.4	 16
427	 24	103.0	16.6	 16
428	 24	209.3	21.3	 16
429	 24	1040.3	104.4	 16
430	 24	395.5	56.6	 16
431	 24	62.8	11.4	 16
432	 24	87.0	15.8	 16
433	 24	65.5	17.1	 16
434	 24	126.3	20.9	 16
435	 24	435.3	40.8	 16
436	 24	153.0	22.2	 16
437	 24	67.3	11.7	 16
438	 24	96.0	13.7	 16
439	 24	264.8	25.5	 16
440	 24	61.0	11.8	 16
441	 24	148.5	17.9	 16
442	 24	120.8	16.8	 16
443	 24	72.5	10.2	 16
444	 24	72.3	12.9	 16
445	 24	113.5	18.4	 16
446	 24	193.0	23.0	 16
447	 24	461.0	40.0	 16
448	 24	150.8	14.9	 16
449	 24	194.0	27.5	 16
450	 24	402.3	43.9	 16
451	 24	273.5	23.9	 16
452	 24	133.8	20.1	 16
453	 24	112.5	15.9	 16
454	 24	65.8	11.9	 16
455	 24	167.5	21.3	 16
456	 24	59.0	10.7	 16
457	 24	65.3	8.8	 16
458	 24	87.8	16.9	 16
459	 24	90.5	16.2	 16
460	 24	82.0	12.4	 16
461	 24	196.5	35.2	 16
462	 24	387.5	39.0	 16
463	 24	94.0	18.4	 16
464	 24	146.5	16.3	 16
465	 24	60.0	10.5	 16
466	 24	47.5	7.3	 16
467	 24	54.3	8.6	 16
468	 24	178.3	27.2	 16
469	 24	103.8	19.0	 16
470	 24	103.5	18.6	 16
471	 24	65.3	10.3	 16
472	 24	231.3	33.0	 16
473	 24	123.5	21.1	 16
474	 24	310.3	40.9	 16
475	 24	211.8	24.9	 16
476	 24	103.8	19.0	 16
477	 24	68.3	15.8	 16
478	 24	57.5	8.4	 16
479	 24	459.5	64.6	 16
480	 24	128.5	25.0	 16
481	 24	85.5	10.6	 16
482	 24	95.3	16.3	 16
483	 24	52.8	8.7	 16
484	 24	184.5	25.8	 20
485	 24	128.0	18.7	 16
486	 24	97.0	14.9	 16
487	 24	75.3	12.1	 16
488	 24	61.0	9.5	 16
489	 24	111.8	17.1	 16
490	 24	75.8	13.9	 16
491	 24	55.8	9.7	 16
492	 24	64.8	12.6	 16
493	 24	464.5	35.1	 16
494	 24	154.3	31.7	 16
495	 24	80.8	14.9	 16
496	 24	62.0	11.6	 16
497	 24	217.3	27.4	 16
498	 24	54.5	14.6	 16
499	 24	70.0	10.4	 16
500	 24	63.0	11.4	 16
501	 24	61.0	9.0	 16
502	 24	68.3	14.2	 16
503	 24	55.3	9.2	 16
504	 24	162.3	18.0	 16
505	 24	238.8	35.2	 16
506	 24	106.0	13.9	 16
507	 24	61.0	8.0	 16
508	 24	66.3	9.4	 16
509	 24	106.8	13.9	 16
510	 24	87.3	10.4	 16
511	 24	177.0	20.5	 16
512	 24	57.0	11.9	 16
513	 24	63.5	14.4	 16
514	 24	60.5	16.1	 16
515	 24	51.3	7.4	 16
516	 24	84.8	17.4	 16
517	 24	68.5	15.3	 16
518	 24	145.8	15.8	 16
519	 24	83.3	19.8	 16
520	 24	199.0	31.0	 16
521	 24	1237.8	85.1	 16
522	 24	236.8	29.1	 16
523	 24	121.5	11.9	 16
524	 24	199.0	25.5	 16
525	 24	68.3	11.5	 16
526	 24	77.3	13.2	 16
527	 24	141.8	17.9	 16
528	 24	160.3	22.3	 16
529	 24	170.0	25.9	 16
530	 24	127.8	12.4	 16
531	 24	91.3	13.7	 16
532	 24	2283.5	160.5	 16
533	 24	65.3	13.0	 16
534	 24	105.8	16.6	 16
535	 24	129.5	25.0	 16
536	 24	69.0	11.9	 16
537	 24	98.3	12.2	 16
538	 24	67.3	10.1	 16
539	 24	61.8	11.0	 16
540	 24	75.0	12.7	 16
541	 24	62.0	11.9	 16
542	 24	60.8	8.9	 16
543	 24	950.5	95.5	 16
544	 24	159.0	20.5	 16
545	 24	70.0	11.0	 16
546	 24	104.8	20.8	 16
547	 24	88.3	10.8	 16
548	 24	70.0	8.8	 16
549	 24	209.3	22.2	 16
550	 24	73.3	11.9	 16
551	 24	219.5	33.2	 16
552	 24	75.0	12.5	 16
553	 24	144.0	18.9	 16
554	 24	75.3	12.2	 16
555	 24	101.8	15.6	 16
556	 24	95.0	14.5	 16
557	 24	67.0	11.2	 16
558	 24	124.0	20.4	 16
559	 24	65.0	13.9	 16
560	 24	56.0	9.1	 16
561	 24	1276.0	152.9	 16
562	 24	81.5	13.5	 16
563	 24	149.3	16.7	 16
564	 24	141.5	16.8	 16
565	 24	144.3	22.1	 16
566	 24	138.8	22.3	 16
567	 24	99.3	16.8	 16
568	 24	94.3	17.4	 16
569	 24	144.3	23.1	 16
570	 24	160.5	18.0	 16
571	 24	61.0	12.3	 16
572	 24	105.3	15.8	 16
573	 24	292.0	44.2	 16
574	 24	152.8	29.6	 16
575	 24	611.3	93.9	 16
576	 24	63.5	9.7	 16
577	 24	59.3	10.1	 16
578	 24	550.3	116.4	 16
579	 24	87.0	20.8	 16
580	 24	58.3	9.8	 16
581	 24	156.3	25.8	 16
582	 24	113.8	22.2	 16
583	 24	67.0	10.2	 16
584	 24	66.3	13.0	 16
585	 24	56.0	10.4	 16
586	 24	236.3	45.2	 16
587	 24	463.3	123.2	 16
588	 24	90.0	12.1	 16
589	 24	309.0	67.1	 16
590	 24	207.8	52.3	 16
591	 24	73.8	13.2	 16
592	 24	125.5	29.6	 16
593	 24	131.8	22.1	 16
594	 24	240.5	54.1	 16
595	 24	57.0	12.6	 16
596	 24	67.0	10.6	 16
597	 24	72.3	17.6	 16
598	 24	103.3	20.0	 16
599	 24	143.3	29.3	 16
600	 24	86.3	14.7	 16
601	 24	54.0	10.4	 16
602	 24	77.0	17.0	 16
603	 24	342.0	70.8	 20
604	 24	64.3	9.7	 16
605	 24	2473.0	196.1	 16
606	 24	104.0	18.8	 16
607	 24	79.0	7.4	 16
608	 24	99.8	14.2	 16
609	 24	110.5	16.5	 16
610	 24	99.5	19.2	 16
611	 24	92.8	11.4	 16
612	 24	317.5	32.4	 16
613	 24	135.0	19.1	 16
614	 24	323.8	43.3	 16
615	 24	145.3	22.7	 16
616	 24	164.8	23.6	 16
617	 24	59.3	14.1	 16
618	 24	100.5	22.2	 16
619	 24	87.8	12.6	 16
620	 24	213.8	31.0	 16
621	 24	157.0	19.2	 16
622	 24	108.3	16.8	 16
623	 24	157.0	24.8	 16
624	 24	85.5	14.5	 16
625	 24	95.3	16.9	 16
[truncated: 11,024,752 more chars]
